# Supplementary material for: Dynamic chromatin architecture identifies new autoimmune-associated enhancers for IL2 and novel genes regulating CD4+ T cell activation
Source: eLife. 2024 Sep 20;13:RP96852. doi: 10.7554/eLife.96852 (PMC11418197; doi:10.7554/eLife.96852)
Supplement: Supplementary file 1. [file elife-96852-supp1.xlsx]

## Sheet: SupTab_01_Tcell_activation_kmea
Table S1: Expression and clustering of differentially expressed genes.
gene_name	gene_id	cluster	score	CD4_unstim_ND543	CD4_unstim_ND581	CD4_unstim_ND589	CD4_8hr_ND543	CD4_8hr_ND581	CD4_8hr_ND589	CD4_24hr_ND543	CD4_24hr_ND581	CD4_24hr_ND589
A1CF	ENSG00000148584.10	2	0.990989	0.522607	0.550769	0.613973	0.700315	0.671636	0.162222	0.306009	0.130891	0.0403842
A2ML1	ENSG00000166535.15	2	0.984511	1.59569	1.71712	1.55701	1.81719	2.26904	0.46791	1.03564	0.526771	0.0868953
AAAS	ENSG00000094914.8	5	0.958287	15.8282	15.6678	17.037	18.6141	18.9916	19.0783	44.4136	47.9014	51.6477
AADAC	ENSG00000114771.9	2	0.952634	0.866928	0.664863	0.959435	1.07516	1.13028	0.391653	0.317693	0.137011	0.0422726
AAED1	ENSG00000158122.7	5	0.974286	3.91655	4.09385	4.58831	3.08198	3.02441	2.933	6.18575	7.11393	6.9962
AAGAB	ENSG00000103591.8	3	0.97021	10.3192	9.30298	8.83376	16.8201	17.6811	19.7442	29.3216	27.3173	29.9758
AAK1	ENSG00000115977.14	4	0.985387	36.3871	30.1712	39.8569	19.7347	10.5967	9.03636	10.7734	9.04637	9.30632
AAMDC	ENSG00000087884.10	2	0.916187	3.28336	3.46848	3.59802	3.04586	2.50237	0.56899	1.31406	0.940958	0.308462
AAMP	ENSG00000127837.5	3	0.990189	12.911	13.8189	14.9065	21.5307	28.1922	31.696	38.4961	39.8989	43.687
AAR2	ENSG00000131043.7	3	0.901916	15.114	14.6351	15.6994	31.0846	42.5896	49.5553	43.7775	38.4822	41.4629
AARS	ENSG00000090861.11	3	0.942625	27.3262	25.3	28.7253	109.364	137.633	154.711	120.113	152.577	163.485
AARS2	ENSG00000124608.4	3	0.921684	17.317	15.5609	18.1077	25.1397	24.6565	27.0319	30.274	24.5568	28.3241
AARSD1	ENSG00000266967.2	1	0.732607	2.36536	2.41826	2.25124	4.50278	4.23266	4.16507	2.60118	1.67617	1.9893
AASDHPPT	ENSG00000149313.6	3	0.847545	11.0058	7.35381	10.2305	12.8056	11.2819	13.0039	13.183	12.7272	14.2493
AATF	ENSG00000108270.6	3	0.991305	12.7934	11.5456	12.6861	26.8396	32.3528	37.897	41.6642	40.3758	43.4298
ABCA1	ENSG00000165029.11	2	0.965333	2.6605	1.98423	1.96656	2.41749	2.54404	0.580002	1.07383	0.698022	0.170841
ABCA10	ENSG00000154263.13	2	0.978141	1.11323	1.17735	1.25265	1.23754	1.15695	0.388624	0.710715	0.317221	0.142615
ABCA13	ENSG00000179869.10	2	0.971219	0.810322	0.950406	0.847723	1.1486	1.3191	0.281282	0.666345	0.252151	0.0569247
ABCA2	ENSG00000107331.12	4	0.83636	9.54238	5.14451	5.78942	5.1426	3.311	0.98251	4.34519	3.92542	2.98084
ABCA4	ENSG00000198691.7	2	0.979599	1.79561	2.04682	1.86548	2.55486	2.78141	0.562286	1.32257	0.659059	0.105738
ABCA6	ENSG00000154262.8	2	0.990776	0.907653	0.928364	0.851152	1.02652	1.06582	0.316051	0.605961	0.279929	0.0498274
ABCA7	ENSG00000064687.8	4	0.963292	28.2587	36.2848	35.5441	13.3029	6.20388	2.10861	3.43235	3.37862	2.66786
ABCA8	ENSG00000141338.9	2	0.975906	0.776158	1.11093	0.843179	1.27099	1.25703	0.280465	0.571873	0.310436	0.0468489
ABCB1	ENSG00000085563.10	2	0.533439	11.7051	4.67099	6.03798	10.7079	8.23908	10.6623	2.54232	2.1336	2.10186
ABCB10	ENSG00000135776.4	5	0.997377	7.29493	6.73476	7.30269	6.27847	5.26907	3.67209	14.0583	17.2726	16.5839
ABCB4	ENSG00000005471.11	2	0.980426	1.53232	1.60506	1.6522	2.07001	2.14501	0.402339	1.17638	0.386279	0.0423403
ABCB6	ENSG00000115657.8	1	0.860488	0.719055	0.753914	0.906203	1.4471	1.83011	1.34199	1.32351	0.892773	1.09729
ABCB7	ENSG00000131269.11	3	0.928198	14.3327	15.5846	12.4893	17.4311	17.7404	21.1597	19.7549	23.4696	26.0632
ABCB8	ENSG00000197150.8	5	0.974759	9.58176	9.88352	11.8509	10.3216	8.61684	9.00223	14.7323	15.5106	16.8519
ABCC1	ENSG00000103222.14	1	0.918011	35.6414	29.7758	34.87	78.624	70.9715	77.8228	69.7011	58.2476	66.6059
ABCC3	ENSG00000108846.11	2	0.981963	2.16766	2.47562	2.28662	3.04988	3.11695	0.716095	1.69365	0.820102	0.165019
ABCC4	ENSG00000125257.9	1	0.970023	8.66205	5.07277	6.51121	14.6855	25.0525	27.3423	13.9592	11.8439	13.6139
ABCC8	ENSG00000006071.7	2	0.979428	1.68006	2.14672	1.99634	2.36142	2.81638	0.595526	1.28276	0.652002	0.103161
ABCC9	ENSG00000069431.6	2	0.974396	0.759672	0.97848	0.811235	0.847927	1.11207	0.281598	0.569431	0.223446	0.0339558
ABCD1	ENSG00000101986.8	4	0.570503	3.99885	5.11882	5.27298	2.90209	3.51617	1.67388	4.097	4.49008	4.4975
ABCD2	ENSG00000173208.3	4	0.976132	8.63154	10.0651	9.84329	4.29798	1.32026	0.668632	0.988499	1.00138	1.1473
ABCD3	ENSG00000117528.7	3	0.971855	8.17446	6.71866	7.89675	8.54708	10.4803	12.1093	13.7191	13.8321	15.0096
ABCE1	ENSG00000164163.6	3	0.91217	20.325	16.5031	19.8303	79.7068	135.369	153.01	111.065	119.435	138.664
ABCF1	ENSG00000204574.8	3	0.92614	29.8644	29.6302	29.7956	88.1814	128.997	155.578	117.905	122.082	144.155
ABCF2	ENSG00000033050.3	1	0.920359	18.7409	19.1979	19.5043	90.6763	137.016	180.006	115.344	116.717	133.111
ABCF3	ENSG00000161204.7	3	0.934906	19.456	18.7915	20.1553	24.2812	23.0772	24.3974	24.1378	24.5345	25.6477
ABCG1	ENSG00000160179.14	5	0.487811	3.34743	4.33221	5.87288	3.17734	2.8193	0.656461	2.39925	5.59147	4.73219
ABHD10	ENSG00000144827.4	5	0.913559	17.9639	14.8532	15.6133	21.5786	16.4228	17.4493	24.956	27.1453	29.5954
ABHD11	ENSG00000106077.14	5	0.981662	7.2835	9.05618	11.4439	6.34612	6.15559	5.51039	19.1727	26.6574	26.2298
ABHD12	ENSG00000100997.14	5	0.913355	10.0466	9.00587	9.38327	8.39415	6.30836	5.18788	13.1498	12.0855	13.3249
ABHD14A	ENSG00000248487.4	5	0.683544	6.59416	7.75854	7.14974	5.12612	3.48088	2.30694	7.53173	7.65413	7.68014
ABHD14B	ENSG00000114779.15	4	0.643109	39.3955	36.217	39.3563	21.6441	12.0227	9.12519	26.7463	37.4626	36.4265
ABHD15	ENSG00000168792.4	4	0.635047	9.96956	8.62095	10.0361	6.24083	3.67403	2.92391	7.64452	9.47988	9.00033
ABHD17A	ENSG00000129968.11	5	0.78491	22.2802	20.2324	21.7877	18.2287	12.1063	13.2445	22.3645	23.6266	25.9634
ABHD17C	ENSG00000136379.7	5	0.919291	1.78236	1.71696	1.48625	2.54641	3.47443	2.36921	6.14957	11.9298	10.1965
ABHD2	ENSG00000140526.12	5	0.955511	19.5036	16.8965	19.0114	16.6768	10.8866	13.8054	29.7984	28.3322	31.3192
ABHD4	ENSG00000100439.6	4	0.987935	14.054	15.1347	15.5108	8.57272	4.8706	2.61176	4.83748	4.98569	5.825
ABHD5	ENSG00000011198.3	5	0.898623	3.43247	3.20036	3.34577	3.78801	4.1605	3.70712	8.0796	6.83252	7.21335
ABHD6	ENSG00000163686.9	5	0.524332	3.76837	3.85058	3.80189	4.49716	5.05947	1.79222	5.65093	6.78155	3.29076
ABI3	ENSG00000108798.4	5	0.986197	11.6716	8.57933	7.47629	7.55755	5.53503	3.31468	36.66	48.8212	44.0262
ABI3BP	ENSG00000154175.12	2	0.978482	0.829069	1.0879	0.836299	1.23337	1.02137	0.210566	0.500257	0.291446	0.0481719
ABL1	ENSG00000097007.13	5	0.986795	15.749	16.4062	16.5611	16.4592	15.7472	14.3486	26.6967	30.2784	28.9582
ABLIM1	ENSG00000099204.14	4	0.98325	249.849	194.968	218.135	147.116	56.5242	55.9437	76.8166	71.9685	77.9183
ABR	ENSG00000159842.10	5	0.807456	16.5705	13.7042	13.9625	10.6677	6.50832	3.86687	18.2262	20.5263	16.8584
ABRACL	ENSG00000146386.7	5	0.907341	24.1006	20.758	24.707	35.7179	35.1427	40.2436	87.6363	82.2727	101.594
ABT1	ENSG00000146109.3	3	0.955307	26.0652	26.3298	25.6607	45.0926	58.2598	70.6427	59.4109	62.6656	69.5883
ABTB1	ENSG00000114626.13	4	0.982126	39.379	39.4098	48.3964	18.8691	4.82104	2.52322	2.98249	2.69236	1.85042
ABTB2	ENSG00000166016.4	1	0.922054	2.12096	2.77895	2.52363	15.8493	23.3451	29.3146	11.0917	3.57685	4.22526
AC002116.7	ENSG00000267698.1	5	0.811322	5.2915	4.37812	4.32276	5.15976	5.70976	1.71936	7.19237	6.63451	7.18267
AC002117.1	ENSG00000224505.2	4	0.972192	30.6757	24.8812	32.5538	16.2331	7.12834	5.6317	4.15292	2.62684	2.78598
AC002398.5	ENSG00000225872.2	2	0.990302	1.98293	2.19439	2.06508	2.37866	2.27327	0.403956	0.948762	0.688912	0.0991912
AC002472.13	ENSG00000187905.6	2	0.976	1.4581	2.00107	1.30704	1.84449	2.07692	0.444308	0.947483	0.467352	0.0954223
AC003104.1	ENSG00000236194.2	1	0.699817	8.18768	5.87341	8.38905	12.7669	14.5921	18.811	5.05568	3.28443	4.68972
AC003665.1	ENSG00000234494.3	3	0.664388	1.04184	1.17967	0.865246	2.05482	1.96022	1.11186	2.26499	1.70054	1.86654
AC003984.1	ENSG00000235139.2	2	0.95814	0.238712	0.418954	0.334865	0.440373	0.533725	0.0352564	0.123927	0.0712614	0.00824494
AC004067.5	ENSG00000273447.1	4	0.975771	26.4904	18.7675	28.6376	15.1155	3.5438	3.23049	3.44099	3.04714	3.47517
AC004381.6	ENSG00000005189.15	5	0.619702	1.59321	1.53557	1.4342	2.11574	2.07577	0.525624	1.99211	2.47381	1.93815
AC004463.6	ENSG00000260924.2	1	0.944958	6.47523	5.84456	6.76158	12.0385	15.6565	16.8319	8.80132	7.82871	7.97821
AC004840.9	ENSG00000175873.3	4	0.895209	6.17278	7.18114	9.04629	5.55275	3.93641	1.84768	1.91111	0.847655	0.443464
AC005264.2	ENSG00000267551.3	2	0.97864	1.54056	2.24395	1.52548	2.01067	2.26779	0.606753	0.93481	0.459895	0.0608113
AC005339.2	ENSG00000268565.1	1	0.935863	6.07578	5.00526	6.66091	13.7247	14.9346	18.46	9.46273	7.28747	7.46479
AC005540.3	ENSG00000235852.1	1	0.806357	2.12884	3.24891	2.56626	5.95187	6.69428	5.08536	4.29843	2.61112	2.99229
AC005682.5	ENSG00000228649.4	3	0.882557	4.20097	3.6212	5.01932	18.7754	26.6494	32.8587	32.0307	20.3972	26.4775
AC005786.7	ENSG00000267436.1	2	0.865473	3.76376	4.2276	7.0066	4.44374	5.09304	1.24519	1.19369	1.55053	0.56159
AC005943.4	ENSG00000266926.1	1	0.869075	1.75219	2.55602	3.15462	4.53379	7.06106	6.86967	3.96938	2.35383	2.44279
AC005943.5	ENSG00000267161.1	1	0.980404	1.08588	1.36128	2.0161	4.53111	5.70024	5.96076	3.45929	3.20111	3.01921
AC006004.1	ENSG00000236795.1	2	0.93651	0.991386	1.19311	0.942415	1.71394	1.06397	0.374841	0.426715	0.248601	0.0164361
AC006129.1	ENSG00000268355.1	1	0.792818	1.14117	2.28894	0.695383	4.81192	6.75846	3.78576	4.32521	4.12731	3.16534
AC006129.4	ENSG00000270164.1	3	0.876095	1.77828	1.58526	0.880435	5.51965	6.28088	4.93183	16.1139	15.2843	12.3865
AC006132.1	ENSG00000267757.1	5	0.81048	1.44638	2.00316	2.45524	1.96036	2.57105	2.36002	2.76951	6.44586	10.3911
AC006273.4	ENSG00000272473.1	2	0.905246	2.37104	1.78342	2.05435	1.45802	2.99639	0.408554	0.839266	0.353907	0.081894
AC006369.2	ENSG00000236213.1	4	0.885784	6.05361	4.51442	5.07214	4.41796	3.25926	0.366804	1.93399	0.556047	0.321673
AC006372.4	ENSG00000234210.1	2	0.963229	1.42854	2.02259	1.74739	1.57235	2.23008	0.37233	0.880431	0.54561	0.095779
AC006942.4	ENSG00000269194.1	4	0.869426	8.01536	10.8274	8.58481	5.34561	5.53378	2.12605	2.50134	1.53822	0.610189
AC007036.4	ENSG00000230751.1	2	0.894202	4.86619	3.51379	4.04759	3.48824	3.86007	1.60991	0.881902	1.04593	0.564731
AC007040.6	ENSG00000228384.3	2	0.979101	2.04614	1.99343	2.02611	2.03371	2.52328	0.448988	0.761511	0.70681	0.121152
AC007092.1	ENSG00000233723.3	2	0.982803	1.39822	1.32522	1.15631	1.29578	1.59522	0.236011	0.583029	0.275211	0.0636838
AC007099.2	ENSG00000237293.1	2	0.981638	5.06315	4.82391	3.76019	5.3374	5.02039	0.897359	2.15062	0.793525	0.209853
AC007228.11	ENSG00000269696.1	2	0.963674	1.62219	1.91889	1.77106	1.79775	1.55269	0.344024	0.730264	0.447013	0.189638
AC007278.2	ENSG00000236525.1	1	0.580359	1.06326	0.710892	0.912474	2.31643	1.90184	1.88445	0.802898	0.349151	0.117518
AC007292.7	ENSG00000269425.1	3	0.922815	1.21951	0.91728	1.81136	1.92835	4.62345	4.32276	3.62599	5.73386	5.81271
AC007308.6	ENSG00000234252.1	2	0.97867	1.0987	1.6706	1.19323	1.60656	1.57109	0.293137	0.742681	0.33328	0.0440692
AC007383.3	ENSG00000227946.1	4	0.966075	5.67621	6.35265	6.5167	3.90239	2.39909	1.06919	1.86359	1.28929	0.852403
AC007386.4	ENSG00000232613.2	4	0.784227	7.21729	2.7574	4.59427	2.35493	3.60823	0.710636	1.45981	1.30811	0.142446
AC007563.1	ENSG00000236295.1	2	0.916673	0.515521	0.816335	0.617943	0.829468	1.2977	0.160294	0.184398	0.194395	0
AC007743.1	ENSG00000233251.3	2	0.993535	1.0309	1.07984	0.998127	1.06259	1.20258	0.284216	0.454103	0.276975	0.0379805
AC008267.1	ENSG00000267941.1	2	0.914968	1.96799	2.19298	1.94873	1.61357	1.61551	0.129183	1.07328	0.424301	0.120841
AC008271.1	ENSG00000231031.2	2	0.977083	1.3775	1.65011	1.74292	2.25885	2.18718	0.497322	0.65012	0.514024	0.0792968
AC008753.6	ENSG00000228323.2	4	0.945752	8.33171	11.0763	12.4712	5.1064	2.93837	1.83151	1.97524	1.64851	1.04401
AC009133.17	ENSG00000260719.1	4	0.959404	9.60531	12.5179	11.4441	6.28111	2.57653	0.576564	1.16362	1.05803	0.83029
AC009313.1	ENSG00000224467.1	4	0.91054	2.87482	1.69596	2.34433	1.24787	1.18362	0.299714	0.957731	0.302896	0.14018
AC009501.4	ENSG00000231609.1	2	0.977247	1.68365	2.0923	1.5222	1.85201	1.79325	0.324347	0.766968	0.458906	0.0455104
AC010536.1	ENSG00000226180.2	1	0.927639	2.96573	3.17041	3.54985	6.32144	7.98374	8.62565	4.81739	3.51705	3.76868
AC010731.3	ENSG00000231653.1	2	0.840109	1.05199	2.26079	2.08339	2.21794	1.05187	0.177569	0.510677	0.134591	0.186866
AC010760.1	ENSG00000269182.1	4	0.827772	164.967	74.9668	96.9902	103.254	60.1372	10.6595	37.9552	13.8506	3.20503
AC010761.8	ENSG00000264577.1	3	0.364467	0.851555	0.474455	1.49906	2.19433	1.65561	0.950263	3.00082	1.14395	1.2157
AC010907.5	ENSG00000224661.1	2	0.970154	2.52969	3.06556	2.29619	3.11117	4.18054	0.871784	1.31329	0.566382	0.131061
AC011298.2	ENSG00000219159.3	2	0.96579	1.05137	1.40588	0.867567	1.58331	1.37247	0.325352	0.524554	0.369907	0.0207507
AC011343.1	ENSG00000253311.1	2	0.970718	0.637161	0.897648	0.82621	0.79961	0.778663	0.22406	0.335078	0.224174	0.0440142
AC011475.1	ENSG00000226104.1	4	0.930101	33.6043	21.0635	23.9167	8.85613	7.35011	4.34278	7.73161	2.35118	5.65827
AC011518.1	ENSG00000267204.1	2	0.995679	1.60879	1.93613	1.56407	1.97344	2.01319	0.501139	0.944261	0.471531	0.0606179
AC011526.1	ENSG00000267107.2	2	0.98168	0.744612	0.746766	0.563835	0.761857	0.894162	0.129382	0.347289	0.0980669	0.0453854
AC011893.3	ENSG00000226806.1	3	0.37573	0.913651	1.14537	0.769002	2.21522	1.86516	0.755671	2.66483	1.45238	1.21179
AC012146.7	ENSG00000234327.3	5	0.989096	5.46536	5.1822	5.11667	5.13288	3.82532	3.46364	8.10402	10.5902	10.8732
AC012314.8	ENSG00000237017.1	2	0.994131	1.49337	1.92854	1.72184	1.984	2.07617	0.483426	0.868937	0.540467	0.118705
AC013264.2	ENSG00000231621.1	4	0.909684	37.2025	32.0604	22.3992	21.0868	7.19664	5.63266	2.96455	3.85078	2.24705
AC013394.2	ENSG00000272888.1	4	0.91638	31.426	23.4071	25.5398	21.4121	11.3555	11.864	8.45403	6.4526	7.31476
AC013449.1	ENSG00000268412.1	3	0.675164	10.2157	10.2452	5.16105	16.7029	12.6465	13.7947	28.2195	13.1632	17.8005
AC015969.3	ENSG00000203395.2	2	0.910278	1.14135	0.722941	0.654316	1.07653	0.840902	0.212933	0.238148	0.107597	0.0746936
AC016586.1	ENSG00000205147.3	2	0.941827	4.9493	4.71124	3.90407	4.11201	4.10997	1.7841	1.78158	1.10812	0.834447
AC016700.3	ENSG00000226505.1	4	0.944458	8.25748	9.52803	8.7921	6.64556	3.72876	0.944194	2.21258	1.90844	0.846423
AC016735.2	ENSG00000231826.1	2	0.972987	2.12729	2.3808	1.74013	2.21002	2.87717	0.309636	1.01272	0.662661	0.102227
AC016747.3	ENSG00000212978.5	4	0.680076	5.94659	4.3423	5.45422	3.72655	1.88607	1.27897	4.5163	5.19063	4.07754
AC017002.2	ENSG00000224959.1	1	0.583051	0.482752	0.484149	0.191211	3.35874	1.68944	1.59712	0.656171	0.21617	0.0800349
AC017048.2	ENSG00000236231.1	2	0.922121	1.44873	1.34914	0.81974	0.98177	1.44856	0.244536	0.644663	0.0463372	0
AC018462.2	ENSG00000229839.2	2	0.902294	1.34356	1.16159	0.734016	0.879101	1.5673	0.191593	0.288623	0.228203	0.0576068
AC018737.1	ENSG00000236859.2	4	0.950825	7.16931	6.96537	7.02519	5.23524	3.7896	1.6986	2.28392	1.57172	1.95003
AC018755.1	ENSG00000167765.3	4	0.980515	5.15976	4.32061	4.36519	2.69322	0.876559	0.621493	0.992983	0.942135	0.477546
AC020571.3	ENSG00000229056.2	1	0.811165	7.14575	5.89239	8.17649	37.1619	52.114	50.815	3.92706	3.4605	2.58876
AC020743.2	ENSG00000228005.1	3	0.7242	0.443603	0.778552	0.549076	1.63671	1.94054	0.851731	1.88425	1.2415	1.83861
AC021860.1	ENSG00000196355.2	4	0.930512	7.62677	6.74897	12.6609	4.01994	2.25039	0.848137	1.11796	0.421874	0.24173
AC022154.7	ENSG00000268093.1	2	0.977262	2.49427	2.82219	1.89989	2.69679	2.76043	0.453403	1.12285	0.515493	0.265078
AC022182.1	ENSG00000254777.1	2	0.939441	5.61664	3.75526	4.57292	5.65772	4.4408	1.06919	1.69651	0.894244	0.336258
AC022182.3	ENSG00000254802.1	4	0.946741	21.6861	14.8965	16.0808	13.0484	6.93083	3.27604	3.98178	5.01057	3.85798
AC022201.4	ENSG00000229229.1	2	0.916566	2.80097	4.58322	4.08734	3.4189	3.09545	1.1322	1.7533	0.660125	0.183303
AC022816.2	ENSG00000230647.1	2	0.931001	2.01015	2.44037	1.67619	3.45736	2.09807	0.437518	0.898766	0.426372	0.04385
AC023115.1	ENSG00000230906.2	2	0.943288	2.62331	2.03895	2.01317	1.86665	2.67766	0.619918	0.705708	0.352406	0.108729
AC025171.1	ENSG00000215068.3	4	0.985794	27.1164	19.6886	26.7295	15.4567	3.86457	1.79407	4.11728	3.37899	3.47087
AC026806.2	ENSG00000268913.1	3	0.779933	9.21653	9.8209	10.6474	7.69164	12.3193	16.5616	14.0281	13.6708	15.0412
AC027228.1	ENSG00000268838.1	2	0.914161	1.88128	1.88673	1.99593	1.48739	1.48918	0.238162	0.570781	0.391121	0.111391
AC027307.3	ENSG00000268798.1	1	0.90202	2.4745	3.87759	3.29256	6.43981	6.94585	8.7256	5.29913	3.08176	4.03834
AC062029.1	ENSG00000234028.3	4	0.941607	3.81314	3.64492	3.93315	2.80541	2.15458	0.926901	1.38347	0.951563	0.699675
AC064834.2	ENSG00000223466.1	4	0.824242	2.50179	1.50542	4.65733	2.53181	1.28411	0.295601	0.623427	0.492919	0.290338
AC073046.25	ENSG00000235499.1	1	0.909766	45.5839	29.3106	36.283	103.463	120.344	125.759	64.4789	37.2102	46.736
AC073254.1	ENSG00000237126.4	2	0.993194	1.17287	1.42832	1.41026	1.64853	1.59622	0.313457	0.600987	0.35013	0.0578716
AC074138.3	ENSG00000225975.2	4	0.9241	7.99782	8.02096	8.88172	6.53996	4.35969	3.04692	2.07427	1.97475	1.88979
AC078883.3	ENSG00000232788.1	2	0.863848	4.34387	3.24753	3.20646	4.74568	2.21117	0.886528	1.11824	0.601222	0.261878
AC078883.4	ENSG00000226963.1	4	0.949428	3.20122	3.36336	3.01894	2.08905	1.24478	0.630403	1.12233	0.546082	0.315908
AC079807.4	ENSG00000230773.2	2	0.9038	1.59434	1.21402	1.52026	1.15159	1.17102	0.453508	0.652128	0.251196	0.061186
AC079922.3	ENSG00000237753.1	4	0.959191	15.4389	9.9567	12.8717	8.95796	3.48421	3.13144	5.2653	3.20236	4.09743
AC084018.1	ENSG00000212694.4	4	0.977466	54.7215	58.5647	67.8913	28.6359	8.19778	5.61635	4.76789	4.16913	4.70909
AC084082.3	ENSG00000253190.2	1	0.759503	2.65144	3.66525	2.48356	7.0254	8.10865	5.67294	6.73704	4.04317	2.99983
AC084117.3	ENSG00000256006.1	1	0.934788	1.89024	4.42333	1.87174	6.6421	9.18763	11.1671	5.17423	4.65535	4.96187
AC084193.1	ENSG00000230975.1	2	0.881456	0.884899	1.66399	0.547648	1.86566	1.80646	0.457432	0.438514	0.148592	0.0458457
AC087294.2	ENSG00000235530.2	1	0.873606	6.60776	7.18848	6.82033	7.91017	10.5171	10.454	8.49941	8.17451	10.2122
AC091633.3	ENSG00000223711.1	4	0.864133	4.16725	3.52373	2.42733	2.84251	1.71573	0.724094	1.24947	0.76837	0.508002
AC092295.7	ENSG00000233527.4	4	0.905428	5.14555	4.42975	4.91482	3.84018	2.81531	2.23283	1.44418	1.36615	1.24564
AC092594.1	ENSG00000236204.1	2	0.98382	1.20572	1.46833	1.39291	1.42235	1.40652	0.407037	0.520271	0.359938	0.142782
AC092652.1	ENSG00000231758.2	2	0.823602	2.31458	1.39277	0.802175	1.58597	1.21502	0.13674	0.786512	0	0
AC093375.1	ENSG00000226383.1	4	0.877974	1.52652	1.1482	1.84748	1.5645	0.791437	0.150305	0.456283	0.39874	0.10545
AC093609.1	ENSG00000230587.1	4	0.930542	8.30952	6.45179	12.7404	4.52109	3.43957	0.527858	1.41688	1.60039	1.99978
AC093642.3	ENSG00000237940.3	4	0.696931	3.01022	6.09763	7.93883	2.63915	2.95524	1.23253	2.26184	3.97708	3.7553
AC093642.4	ENSG00000226423.1	4	0.927682	85.0609	100.859	108.379	35.2325	31.4363	21.7018	2.04632	7.61784	6.61428
AC093818.1	ENSG00000225205.1	2	0.864723	4.44945	5.02011	5.02547	7.25555	3.48732	2.42327	1.83088	1.19856	0.821233
AC097532.2	ENSG00000230803.1	2	0.974155	5.28329	7.68293	6.80104	6.40488	7.0876	1.87275	2.84256	1.30118	0.328466
AC097713.4	ENSG00000231682.1	4	0.961561	45.3764	39.3237	53.3864	36.334	10.5128	6.44497	14.0582	6.72579	5.04584
AC099850.1	ENSG00000224738.1	5	0.94272	2.73365	2.2315	2.39213	2.07752	2.15065	0.976499	3.38441	4.04235	3.76795
AC103563.8	ENSG00000233850.1	4	0.959446	26.8707	33.9086	32.5988	18.0087	4.98208	3.04877	3.02347	1.99211	1.32761
AC104654.2	ENSG00000234362.1	2	0.949036	2.17862	1.89993	2.62627	2.39648	3.53591	0.2798	1.07291	0.424156	0.0392599
AC104809.3	ENSG00000226321.3	2	0.943079	2.21982	3.77493	2.72372	3.15399	4.09065	0.722232	2.10442	1.10205	0.146675
AC104820.2	ENSG00000234663.1	2	0.911146	3.78814	3.07957	3.23955	3.81181	2.41036	0.932479	1.20272	0.616829	0.380625
AC105053.4	ENSG00000232504.4	2	0.885477	3.58494	4.03111	3.87257	2.63394	2.78797	0.705969	1.78422	0.924259	0.22513
AC108004.2	ENSG00000273172.1	2	0.924743	0.789595	1.51177	0.852945	0.983703	1.4235	0.212034	0.284571	0.224999	0
AC108488.3	ENSG00000234171.1	5	0.974688	8.52724	8.90529	9.83943	9.1377	7.06999	7.70227	19.7166	22.7841	28.3036
AC108676.1	ENSG00000244675.2	2	0.94149	0.744892	0.919442	0.822708	1.38927	0.902362	0.27081	0.405641	0.192434	0.0593725
AC109333.10	ENSG00000227495.1	4	0.861903	13.8607	12.2912	6.6458	9.07449	3.40399	1.03435	2.31367	1.89466	1.7537
AC109826.1	ENSG00000226791.3	4	0.926175	6.92912	6.3501	5.73746	4.53379	3.69312	0.670499	2.09746	1.79212	0.86653
AC112229.7	ENSG00000175772.10	3	0.941505	0.0306636	0.123009	0.121454	0.226272	0.500782	0.507231	0.434155	0.686539	0.851518
AC112721.2	ENSG00000222032.1	2	0.918858	4.71687	4.25747	4.04794	5.13811	3.11802	0.557325	2.3152	1.12648	0.065167
AC114788.2	ENSG00000227744.4	2	0.980349	1.36527	1.78487	1.30362	1.74762	2.13298	0.331269	0.814634	0.316591	0.111152
AC135178.1	ENSG00000198150.2	4	0.984075	6.25725	4.95422	5.40403	3.52127	2.08551	0.639269	1.70527	1.32722	1.73547
AC137056.1	ENSG00000267824.1	2	0.802793	0.390985	1.39419	0.430175	0.915917	0.861517	0.179655	0.172225	0.194531	0.0180058
AC139887.4	ENSG00000233799.1	4	0.758721	46.0995	36.688	48.2988	32.2931	28.7965	34.0871	12.4646	12.9184	12.9434
AC142528.1	ENSG00000235078.1	4	0.961455	8.99515	6.21848	9.42596	5.52372	2.54688	2.01215	2.27515	1.9553	1.08589
AC144521.1	ENSG00000228956.4	4	0.963755	18.3537	12.5728	18.7581	9.14361	4.78931	3.57333	2.33173	2.56345	2.35355
AC145110.1	ENSG00000253490.1	2	0.986015	0.921071	1.12388	0.866453	1.05188	1.30726	0.253936	0.512951	0.261214	0.0763516
AC159540.1	ENSG00000230606.6	2	0.80566	0.628336	0.976738	1.41547	0.596133	1.08114	0.241284	0.311373	0.239157	0.117192
ACAA1	ENSG00000060971.13	5	0.948368	8.17571	8.83563	9.42324	7.54597	6.59089	5.47356	10.8808	12.1514	12.2198
ACAA2	ENSG00000167315.13	5	0.945529	6.39094	6.29538	7.18418	5.10678	3.28986	1.93484	12.2624	13.6164	10.9254
ACACA	ENSG00000132142.15	3	0.912197	4.49218	4.77784	5.27421	16.3235	31.8237	38.6364	24.1429	32.4309	35.9673
ACACB	ENSG00000076555.11	4	0.986417	9.15551	9.20007	11.493	4.93337	3.00644	0.883733	2.47351	2.58788	1.95462
ACAD9	ENSG00000177646.13	3	0.971802	15.1958	13.3471	16.3318	21.4897	20.7305	23.0646	29.0357	28.6615	32.094
ACADL	ENSG00000115361.3	2	0.973748	0.659838	1.03155	0.922418	1.00245	0.928196	0.194909	0.428652	0.173804	0.048262
ACADM	ENSG00000117054.9	5	0.963184	7.65353	6.28334	6.23914	6.02292	5.68907	4.25865	14.4955	15.8685	13.0797
ACADS	ENSG00000122971.4	5	0.63453	8.09492	8.2472	7.47495	7.6191	6.22039	3.52979	8.45954	8.67363	8.12152
ACADSB	ENSG00000196177.8	4	0.61114	14.8476	12.3815	14.783	8.52824	4.94863	4.05648	11.9819	12.0368	14.6747
ACADVL	ENSG00000072778.15	5	0.699405	29.5309	25.4255	31.4406	26.0803	11.1566	8.89354	31.8255	30.9881	33.1756
ACAP1	ENSG00000072818.7	4	0.810734	20.5746	25.1288	24.5727	10.6572	4.96065	1.99763	12.9572	16.9736	16.0956
ACAP2	ENSG00000114331.8	4	0.816886	19.5392	16.5567	19.986	11.5482	7.04286	6.40841	14.281	14.0773	14.6007
ACAP3	ENSG00000131584.14	5	0.931879	5.27225	5.60708	7.1999	5.48657	6.30796	4.56371	7.4812	10.5287	10.7579
ACAT1	ENSG00000075239.9	3	0.911054	3.68638	3.07069	3.39387	4.35174	5.65079	5.07561	8.65301	9.81561	11.1373
ACAT2	ENSG00000120437.7	5	0.988083	7.23426	7.39171	8.16479	8.22062	6.60149	4.91722	27.4792	35.1023	35.747
ACBD6	ENSG00000135847.5	3	0.967204	14.0444	12.0936	16.767	24.6626	33.6932	39.2461	36.3144	35.2115	40.2683
ACCS	ENSG00000110455.9	4	0.959964	6.6285	6.91124	9.94663	5.04827	2.63991	1.17307	2.18296	2.05941	1.73675
ACD	ENSG00000102977.9	5	0.975216	18.1065	17.4431	20.3896	18.4742	16.62	16.0063	49.117	71.6806	77.5552
ACE	ENSG00000159640.10	2	0.97997	0.641877	0.896339	0.708004	0.98499	0.900421	0.187203	0.441751	0.27651	0.033676
ACE2	ENSG00000130234.6	2	0.898722	0.801644	1.32545	0.965429	0.776547	1.4659	0.319996	0.282221	0.329861	0.0628598
ACER3	ENSG00000078124.7	5	0.973333	3.46612	3.06184	3.3823	2.68729	2.22149	2.19057	4.81054	5.00817	5.42069
ACKR3	ENSG00000144476.5	4	0.948188	10.2088	8.31158	6.52788	4.36825	1.84566	0.667654	1.74945	1.14706	0.936812
ACLY	ENSG00000131473.12	3	0.991453	31.3537	29.6784	32.7582	74.9556	115.355	134.054	137.892	151.218	162.261
ACN9	ENSG00000196636.7	5	0.935595	6.31586	6.11188	8.44843	9.65599	8.70332	11.3684	22.4031	27.2231	29.9127
ACO1	ENSG00000122729.14	5	0.718419	6.5032	5.41236	6.49544	5.41533	3.30579	2.48126	6.25352	6.94139	6.83675
ACO2	ENSG00000100412.11	3	0.964213	24.9857	25.6491	26.8463	41.6278	49.7483	54.903	80.6713	85.5758	92.7406
ACOT12	ENSG00000172497.4	2	0.9726	1.42696	1.57071	1.37853	1.54094	1.2992	0.43179	0.611043	0.32728	0.0865517
ACOT13	ENSG00000112304.6	5	0.980447	4.20078	3.55284	3.91046	3.24471	2.66471	2.57322	8.10207	7.89696	8.36051
ACOT4	ENSG00000177465.4	3	0.819749	1.11638	1.51689	0.962813	3.07499	1.89043	2.08497	4.24224	3.54768	3.29866
ACOT6	ENSG00000205669.2	2	0.86381	1.29425	1.15377	0.569591	1.74334	1.00652	0.382307	0.244331	0.160986	0.0596033
ACOT7	ENSG00000097021.15	5	0.943315	2.64294	3.33067	3.1336	5.44389	6.93693	7.22143	29.2273	34.7957	32.5889
ACOT8	ENSG00000101473.12	4	0.825784	10.2768	7.99816	8.69673	6.04458	3.46221	2.70763	6.89505	6.59984	6.78664
ACOT9	ENSG00000123130.12	5	0.813777	2.32628	3.53333	3.87257	2.11465	5.70267	4.06319	4.5157	12.2661	12.702
ACOX1	ENSG00000161533.7	5	0.917656	10.8927	9.2267	10.0664	8.02953	7.1548	6.51166	12.2366	13.1482	12.9045
ACP1	ENSG00000143727.11	3	0.992576	24.4755	23.1313	25.8354	44.4462	51.4737	67.8162	66.8644	71.1242	84.401
ACP2	ENSG00000134575.5	3	0.886284	8.93579	9.10856	9.64613	13.126	11.8479	14.2506	14.6706	12.3429	13.9038
ACP5	ENSG00000102575.6	4	0.888063	8.94742	11.1257	13.6489	6.50047	3.91405	1.10719	6.67655	6.71366	5.82578
ACPL2	ENSG00000155893.7	4	0.96679	11.9052	12.4719	16.2556	8.11236	4.44634	4.06891	4.80236	4.72064	5.65926
ACRBP	ENSG00000111644.3	4	0.926336	6.37284	4.92098	6.63635	4.79408	3.4553	1.0959	1.84698	1.27277	0.930057
ACRC	ENSG00000147174.7	2	0.686576	3.85252	4.14638	6.16418	5.72035	6.2479	5.81487	2.38142	2.2721	1.6065
ACSBG1	ENSG00000103740.5	2	0.979875	1.41596	1.82431	1.45327	1.67788	1.91701	0.323616	0.86631	0.634049	0.0771077
ACSL1	ENSG00000151726.9	1	0.920494	5.949	3.71323	3.99583	18.0535	14.3809	23.9873	15.4166	12.6302	16.0701
ACSL3	ENSG00000123983.9	3	0.912529	9.03479	6.5512	7.67827	10.5893	10.0734	10.453	12.13	14.052	16.4687
ACSL4	ENSG00000068366.15	1	0.977501	8.22101	6.31658	7.0245	38.1457	53.225	69.0761	35.2649	34.2832	43.5155
ACSL5	ENSG00000197142.6	1	0.914734	12.3317	9.93734	12.9912	27.6813	43.018	64.6947	33.425	32.9024	45.0122
ACSL6	ENSG00000164398.8	4	0.803451	10.3994	10.8838	10.6635	5.47823	7.18146	5.51707	1.37707	1.15818	0.98062
ACSM2A	ENSG00000183747.7	2	0.958684	0.965304	1.11383	0.955855	1.4115	1.74358	0.288206	0.705414	0.288167	0.0430206
ACSM2B	ENSG00000066813.10	2	0.981393	1.14736	1.14022	0.857259	1.25349	1.20459	0.246485	0.584821	0.326946	0.0389084
ACSM3	ENSG00000005187.7	4	0.657116	2.6712	2.62869	3.28978	2.4991	2.10333	0.789042	2.04231	2.95294	2.51874
ACSS2	ENSG00000131069.15	4	0.705423	9.8809	8.18403	9.12773	7.93687	6.02098	2.52706	8.55491	8.0504	7.31407
ACTB	ENSG00000075624.9	3	0.929976	615.882	560.653	665.135	1578.53	1772.79	2284.82	4715.7	4980.88	5521.67
ACTG1	ENSG00000184009.5	3	0.90294	187.614	157.084	217.25	555.877	668.078	804.118	2302.93	2106.49	2260.23
ACTL10	ENSG00000182584.4	1	0.942462	3.98461	3.74375	4.40247	5.2616	6.70317	7.18595	5.03593	5.08983	6.2062
ACTL6A	ENSG00000136518.12	3	0.985799	12.8922	10.5154	11.0242	19.4708	25.0564	27.1156	33.7021	37.571	39.9273
ACTN1	ENSG00000072110.9	4	0.872232	60.8779	51.3721	54.6065	26.86	12.3823	11.35	30.5428	38.7703	33.7159
ACTN1-AS1	ENSG00000259062.1	4	0.977563	12.3875	9.57058	15.2647	6.57761	1.71265	0.596303	1.24722	0.698507	0.760634
ACTN4	ENSG00000130402.7	5	0.96315	17.2408	16.4799	14.6568	15.2361	18.8438	15.7846	39.0096	43.5189	42.7824
ACTR1A	ENSG00000138107.7	3	0.912903	24.0624	24.4071	25.8642	27.4107	26.6524	33.7445	37.4871	40.9145	45.8052
ACTR1B	ENSG00000115073.6	3	0.902514	42.3684	42.5205	51.2314	54.7887	58.7385	55.387	59.6041	73.1703	73.2584
ACTR2	ENSG00000138071.9	5	0.938723	97.8161	77.8916	83.8731	94.1433	91.8798	97.8315	150.199	155.73	174.237
ACTR3	ENSG00000115091.7	3	0.981931	20.8823	17.4027	19.3077	40.5662	42.148	48.5255	69.2002	66.8244	77.0182
ACTR3B	ENSG00000133627.13	3	0.887907	2.20277	2.4074	2.46085	3.5129	4.69448	4.23773	3.85455	3.98343	4.52982
ACTR5	ENSG00000101442.8	1	0.968981	12.0592	13.086	13.2972	25.906	29.1555	35.6664	19.4764	15.8251	20.45
ACTR8	ENSG00000113812.9	5	0.959037	17.7193	14.8123	16.6965	15.9004	14.0811	14.8927	19.9401	20.9556	21.8764
ACVR1B	ENSG00000135503.8	1	0.971081	8.98447	8.21586	9.7847	13.2375	18.642	20.4806	13.4447	11.3598	12.7266
ACVR1C	ENSG00000123612.11	4	0.923121	3.5338	2.20806	3.57249	2.22342	1.47841	1.00012	0.681088	0.687635	0.68632
ACVRL1	ENSG00000139567.8	2	0.969838	1.80586	1.94649	1.58764	1.95705	2.69723	0.518474	1.0323	0.63482	0.0909365
ACY1	ENSG00000243989.3	3	0.584479	0.767535	0.928234	1.05062	1.42784	1.65904	0.81353	1.84104	1.24336	1.45026
ACYP1	ENSG00000119640.4	5	0.771252	6.23749	4.72641	7.64048	5.11416	5.49761	3.19364	8.11184	7.30336	7.50685
AD000684.2	ENSG00000268947.1	4	0.907571	5.02328	4.19818	5.96894	3.17722	3.32057	0.494608	0.758644	0.787277	0.555203
ADA	ENSG00000196839.8	4	0.722114	34.3286	21.1174	18.5468	17.7953	7.34109	4.86311	12.111	22.0495	17.0714
ADAL	ENSG00000168803.10	5	0.724815	3.13046	3.17327	3.18314	3.6726	2.86645	2.58519	5.03281	3.27835	4.65979
ADAM15	ENSG00000143537.9	3	0.950339	3.21643	3.43301	3.77333	5.95065	12.2658	9.61544	13.4609	14.8481	13.8612
ADAM17	ENSG00000151694.8	1	0.803701	12.9741	10.677	10.8186	23.2801	24.4038	29.6874	11.3733	7.72069	10.311
ADAM18	ENSG00000168619.11	2	0.917168	0.822812	0.512957	0.836778	0.914265	0.67448	0.170792	0.36524	0.189201	0.0184342
ADAM19	ENSG00000135074.11	1	0.801904	1.85347	1.6486	1.72608	8.15272	7.77338	7.50197	9.20365	3.68047	2.70245
ADAM23	ENSG00000114948.8	4	0.885619	2.55792	2.97737	2.83473	1.92805	1.93258	0.508942	0.893221	0.635018	0.307619
ADAM28	ENSG00000042980.8	2	0.973546	0.946031	0.957891	0.990816	1.05481	0.955019	0.263325	0.649119	0.24847	0.0565534
ADAM32	ENSG00000197140.10	2	0.994761	0.880758	0.8918	0.855365	0.937393	1.00768	0.225144	0.450851	0.257872	0.0351009
ADAM33	ENSG00000149451.13	2	0.956392	1.72143	2.43915	2.00171	2.08105	3.05822	0.485167	1.26114	0.728405	0.0785489
ADAMTS10	ENSG00000142303.9	4	0.916992	30.2804	20.5872	15.968	13.6713	4.54723	1.25214	2.82882	2.42911	1.21634
ADAMTS12	ENSG00000151388.6	2	0.958636	0.948215	1.4657	1.18013	1.72404	1.36997	0.37003	0.778428	0.432389	0.068506
ADAMTS17	ENSG00000140470.9	2	0.653228	2.25739	2.93106	2.36487	4.13854	6.47516	4.03305	1.71697	1.16709	0.58307
ADAMTS18	ENSG00000140873.11	2	0.988805	1.05721	1.11137	1.03425	1.23532	1.48587	0.331101	0.649244	0.336517	0.031676
ADAMTS19-AS1	ENSG00000249421.1	2	0.864383	1.40686	0.976798	2.14321	2.85205	2.90357	0.767208	0.551609	0.436136	0.0448542
ADAMTS2	ENSG00000087116.9	2	0.9736	1.73729	1.94207	1.91752	2.72959	2.74948	0.653729	1.24085	0.708567	0.0963136
ADAMTS7	ENSG00000136378.10	2	0.98098	1.73863	2.15199	1.97223	2.76081	2.68284	0.520074	1.04076	0.758827	0.123143
ADAMTS9	ENSG00000163638.9	2	0.984508	1.33641	1.27645	1.25244	1.55135	1.70744	0.375963	0.905541	0.374017	0.0890204
ADAMTS9-AS1	ENSG00000241158.2	2	0.982344	0.693275	0.75322	0.572074	0.872931	0.763799	0.0796389	0.37082	0.10348	0
ADAMTSL3	ENSG00000156218.8	2	0.95729	1.0988	1.42557	1.32983	1.93053	2.07527	0.556411	0.869244	0.495933	0.108434
ADAMTSL5	ENSG00000185761.6	4	0.579127	3.73943	4.96356	6.53439	2.5275	3.18182	1.09159	4.02383	4.65896	4.55849
ADAP1	ENSG00000105963.9	5	0.83795	1.78191	2.37713	2.44695	2.79992	3.43174	1.40031	7.69259	5.43486	5.37192
ADAR	ENSG00000160710.11	3	0.957215	101.552	94.9342	109.519	169.604	232.332	243.954	227.84	234.16	247.788
ADARB1	ENSG00000197381.11	1	0.990688	8.41691	6.20957	6.64407	15.3103	17.5962	20.5023	12.8624	12.4783	13.1341
ADARB2	ENSG00000185736.11	4	0.599202	1.62717	2.2008	10.4805	2.07726	2.10713	1.3758	0.963816	0.594935	1.08278
ADAT1	ENSG00000065457.6	5	0.936337	15.8707	13.1593	15.0019	14.5916	11.0817	12.143	17.7296	18.9172	21.4393
ADAT2	ENSG00000189007.11	1	0.947232	5.96316	5.81396	5.96348	16.6214	18.1996	22.0969	14.5159	15.087	18.0871
ADAT3	ENSG00000213638.4	3	0.927131	1.75069	2.09928	2.86414	3.8114	3.55173	3.91225	4.07376	4.99335	4.81114
ADC	ENSG00000142920.12	2	0.971729	2.7234	3.12146	3.19757	3.06231	2.87437	0.735509	1.68194	0.963989	0.338632
ADCK1	ENSG00000063761.11	3	0.87688	3.95149	4.47633	4.62567	6.02061	7.35287	5.12256	8.13619	7.7869	7.92367
ADCK2	ENSG00000133597.5	5	0.97603	10.9794	9.25404	10.3225	10.3736	10.5937	6.29661	15.3138	17.0375	17.5611
ADCK4	ENSG00000123815.7	4	0.729707	8.1837	9.27994	10.5746	8.20217	5.44227	3.01256	6.59231	8.60616	8.32561
ADCY1	ENSG00000164742.10	2	0.969446	1.31395	1.53843	1.66216	2.06111	2.28815	0.419696	1.03255	0.501099	0.0859887
ADCY2	ENSG00000078295.11	2	0.98483	0.975733	1.13685	0.91882	1.16976	1.21076	0.302349	0.701588	0.357675	0.0396484
ADCY3	ENSG00000138031.10	5	0.928312	4.11404	4.54839	4.24061	5.4322	10.9087	8.56061	25.7489	49.9033	45.6085
ADCY4	ENSG00000129467.9	2	0.949161	1.8558	2.03036	2.24484	2.26755	1.67284	0.423595	0.985334	0.514655	0.157332
ADCY5	ENSG00000173175.10	2	0.965139	1.71598	2.25934	1.94599	2.73866	3.0194	0.594666	1.42247	0.828493	0.135093
ADCY7	ENSG00000121281.8	4	0.782936	52.998	32.6895	34.355	23.7315	6.88721	4.82141	24.7791	26.9361	29.4299
ADCY9	ENSG00000162104.5	5	0.907302	3.34232	3.19551	3.64301	3.09052	3.31457	1.89695	4.25556	4.43847	4.59498
ADCYAP1R1	ENSG00000078549.10	2	0.982913	1.66933	1.97401	1.98605	2.49516	2.60128	0.691813	1.25585	0.652671	0.134247
ADD1	ENSG00000087274.12	5	0.770006	28.9464	27.5721	29.7556	22.1674	17.686	18.002	30.8613	30.9253	32.5223
ADD2	ENSG00000075340.18	5	0.923859	3.28216	2.71948	4.3799	2.6321	2.41939	1.28475	9.80355	6.72038	9.48359
ADD3	ENSG00000148700.9	4	0.98673	85.9062	78.7339	85.3486	35.053	14.5783	11.3857	17.2928	19.7579	22.6107
ADGB	ENSG00000118492.12	2	0.944776	0.930166	0.834084	0.888553	1.56888	1.17443	0.200414	0.433831	0.176407	0.0589631
ADH5	ENSG00000197894.6	5	0.89032	15.1476	13.0337	16.1944	11.174	8.14134	9.47588	17.7321	18.8292	20.6182
ADHFE1	ENSG00000147576.11	4	0.939443	5.07691	4.20512	6.93487	3.29716	2.30021	1.00424	1.45048	0.751026	0.704544
ADI1	ENSG00000182551.9	5	0.776404	7.31279	6.76626	7.34726	5.16077	4.55085	2.58491	8.12718	8.57692	7.81832
ADIPOR1	ENSG00000159346.8	3	0.993624	40.9987	37.9647	42.0218	59.2547	81.1401	91.1243	101.598	106.884	120.407
ADIPOR2	ENSG00000006831.9	3	0.93336	12.1991	10.609	12.7245	23.462	27.1953	33.0768	26.9882	26.6909	32.4724
ADK	ENSG00000156110.9	3	0.968953	9.50849	7.20945	9.9259	13.5559	23.9213	27.8332	24.6871	30.4842	32.3708
ADM2	ENSG00000128165.7	1	0.68668	2.92422	2.31422	3.05318	6.87821	5.82456	5.01816	2.45601	3.03752	2.49822
ADM5	ENSG00000224420.3	1	0.933242	2.32705	3.37653	4.06924	7.04611	7.5084	11.1444	7.06625	4.85537	7.38762
ADNP	ENSG00000101126.11	3	0.931873	48.3439	43.1259	50.5748	50.8242	53.9604	60.0799	63.5722	59.2884	72.0182
ADNP2	ENSG00000101544.4	3	0.934602	12.6011	11.4505	14.2644	26.902	39.704	49.9196	35.7074	41.0236	49.4221
ADO	ENSG00000181915.3	1	0.996172	13.183	12.0296	12.6919	65.9205	85.2073	92.4326	46.7247	42.0997	48.0015
ADORA2B	ENSG00000170425.3	1	0.800384	1.33377	1.80579	1.55184	4.92104	5.29	4.21558	2.75711	1.79173	1.18854
ADPGK	ENSG00000159322.13	1	0.954007	27.0055	22.6824	27.2808	49.0598	55.0589	61.9785	33.8297	30.6974	34.554
ADPRHL2	ENSG00000116863.10	3	0.94705	13.2079	12.3255	13.9371	25.0512	32.5401	35.068	32.9535	33.1339	33.7124
ADPRM	ENSG00000170222.11	4	0.928961	49.7239	48.446	38.3187	32.8784	18.804	15.7891	12.3408	13.1901	13.0575
ADRA1B	ENSG00000170214.3	2	0.97458	1.27249	1.178	1.59927	1.54778	1.65568	0.375879	0.55436	0.306817	0.04057
ADRB2	ENSG00000169252.4	4	0.928561	2.33386	1.54648	2.39355	1.49374	0.875098	0.517048	1.01493	0.447889	0.224557
ADRBK1	ENSG00000173020.6	5	0.586498	107.586	96.7239	102.603	53.0745	23.3141	24.0517	83.8363	102.466	104.169
ADRBK2	ENSG00000100077.10	1	0.939778	5.65028	7.32561	6.55201	11.8441	18.7113	16.1687	9.51583	10.4076	11.5592
ADRM1	ENSG00000130706.8	3	0.993027	22.8735	23.1388	23.2395	59.6114	79.0754	105.689	127.362	116.704	137.565
ADSL	ENSG00000239900.7	3	0.989289	10.6944	12.1139	12.9259	28.6534	42.4526	53.9077	60.3114	68.2392	81.3725
ADSS	ENSG00000035687.9	3	0.913866	12.019	9.40099	10.7985	16.9259	19.1903	23.44	19.1855	18.7121	22.1765
ADTRP	ENSG00000111863.8	2	0.889224	15.3725	16.5269	15.1205	19.1004	9.80309	5.08576	4.5504	2.12015	1.80949
AE000662.92	ENSG00000259003.1	1	0.987755	4.90108	4.15066	4.20602	14.1219	15.6272	18.5309	12.028	10.8757	10.8339
AEBP1	ENSG00000106624.4	1	0.974344	14.6947	15.6152	18.6135	38.9618	57.8938	69.5822	33.2891	29.5797	30.8867
AEN	ENSG00000181026.13	1	0.949791	5.49829	6.06703	5.76638	29.502	49.9925	54.6861	36.2785	34.26	39.7487
AES	ENSG00000104964.10	4	0.932664	188.553	191.16	225.436	91.1577	35.7537	30.58	78.0802	106.359	105.799
AF001548.5	ENSG00000263335.1	4	0.829224	31.44	36.2249	61.0555	26.2784	12.4627	20.9183	10.6029	7.88209	18.7663
AF001548.6	ENSG00000263065.1	4	0.782503	7.11419	3.72249	11.9451	3.4237	2.88659	3.47196	2.10213	1.38506	0.96151
AF011889.2	ENSG00000238039.1	2	0.741167	2.72714	4.42815	5.01512	4.51764	2.27236	2.30162	0.809027	0.755969	1.13032
AF064860.7	ENSG00000231713.2	2	0.976318	1.66693	1.76728	2.12221	2.61072	2.27787	0.478324	0.97103	0.511837	0.0592196
AF121898.3	ENSG00000253500.1	2	0.924912	1.83759	1.50342	2.05902	2.29396	1.46668	0.39996	0.739451	0.454732	0.0601285
AFF2	ENSG00000155966.9	1	0.797676	1.84017	1.94295	1.79209	2.27276	3.93902	2.93849	2.75505	2.81195	3.06087
AFG3L2	ENSG00000141385.5	3	0.991226	8.56516	7.70133	8.85008	17.9499	23.054	26.7875	26.1742	27.0201	31.9395
AFMID	ENSG00000183077.11	5	0.960848	1.57598	2.36027	2.01832	1.86071	3.21113	1.16692	5.91463	7.75333	8.09968
AFTPH	ENSG00000119844.10	3	0.851164	21.4986	17.3259	20.5986	30.8162	30.264	31.2752	31.8278	26.346	32.5902
AGAP2	ENSG00000135439.7	4	0.824518	30.3307	30.499	31.7209	17.3338	8.68138	7.19787	22.0023	21.794	22.7108
AGAP3	ENSG00000133612.14	5	0.597777	4.3795	4.64735	5.4895	4.09652	3.91257	1.95415	4.28377	5.38952	5.06205
AGAP6	ENSG00000204149.5	1	0.972664	5.92235	4.64695	6.35055	16.0445	16.6093	20.177	10.6705	8.25815	11.0014
AGBL4	ENSG00000186094.12	2	0.982767	1.17325	1.48212	1.4187	1.70061	1.92136	0.346566	0.875308	0.429387	0.0514336
AGER	ENSG00000204305.9	4	0.957644	17.9787	20.6183	26.0349	14.549	5.97174	5.29861	6.19279	5.18981	7.2989
AGFG1	ENSG00000173744.13	3	0.930715	14.9206	12.5476	13.7353	44.7428	69.3978	70.588	62.702	64.7855	67.7799
AGFG2	ENSG00000106351.8	5	0.983872	8.86634	10.2468	9.67134	5.33623	6.30354	4.81606	29.4777	32.5893	36.7356
AGGF1	ENSG00000164252.8	5	0.953705	21.3536	17.9363	20.4609	21.0901	20.0967	21.44	30.3769	32.343	33.5662
AGK	ENSG00000006530.11	3	0.970612	5.70364	4.59957	5.2104	13.4906	16.8535	20.8546	18.7265	18.5006	21.8737
AGL	ENSG00000162688.11	5	0.956664	11.8605	10.3776	12.094	11.3654	11.2592	12.6494	19.1576	21.8807	23.8185
AGMAT	ENSG00000116771.5	3	0.963649	11.126	8.66719	7.3784	12.3384	17.2654	18.3119	24.2026	26.0987	28.8953
AGO1	ENSG00000092847.6	5	0.940833	14.9117	13.6573	15.6743	14.8218	14.9848	16.3516	26.3637	25.8845	31.1624
AGO2	ENSG00000123908.7	1	0.983786	34.1725	26.685	31.7951	146.659	201.909	255.271	100.163	77.9707	108.492
AGO4	ENSG00000134698.10	4	0.953024	21.3852	13.7346	13.955	8.74843	2.99031	1.31387	2.83064	2.91421	2.47908
AGPAT1	ENSG00000204310.6	5	0.92776	25.0193	22.1784	25.4471	17.9781	9.0181	8.87128	32.6776	37.229	40.1587
AGPAT2	ENSG00000169692.8	5	0.975534	2.98044	4.31754	3.93503	4.33879	4.58053	1.70488	11.9229	17.4134	15.3139
AGPAT3	ENSG00000160216.14	3	0.953374	15.3164	12.3701	14.4134	26.4417	27.5297	35.5092	38.9195	30.8497	35.942
AGPAT5	ENSG00000155189.7	1	0.971293	5.77855	5.95928	5.99189	26.9714	43.9852	54.4604	28.9805	28.333	33.621
AGPS	ENSG00000018510.8	3	0.995695	7.36773	5.50536	7.40864	11.6065	16.8626	18.41	21.2572	21.677	24.9975
AGRN	ENSG00000188157.9	1	0.949511	2.46737	2.81554	2.8191	10.0623	15.3415	13.8385	11.9584	9.00528	7.95835
AGTRAP	ENSG00000177674.11	4	0.796471	13.0755	16.0236	16.6172	8.95577	4.81246	1.71431	7.97948	12.2424	11.5779
AGXT	ENSG00000172482.4	2	0.994803	1.6024	1.97054	1.73783	2.17183	2.02503	0.60857	0.972337	0.478357	0.0711591
AHCTF1	ENSG00000153207.10	1	0.915393	14.7566	11.337	14.6473	18.8034	21.4686	25.8138	19.2164	19.1219	22.3002
AHCY	ENSG00000101444.8	3	0.959141	8.36629	9.72684	9.19287	38.9392	59.5766	67.6481	105.948	133.713	124.326
AHCYL1	ENSG00000168710.13	3	0.976286	26.1505	22.1733	22.7822	34.2883	42.1964	45.3288	47.9196	58.871	62.4488
AHDC1	ENSG00000126705.9	4	0.850616	9.71004	11.9313	12.463	6.18921	4.74157	3.11048	8.11087	7.61571	7.37422
AHI1	ENSG00000135541.16	1	0.924922	4.0952	3.11704	2.59373	10.3135	9.54298	11.8138	9.62592	8.57806	8.03302
AHNAK	ENSG00000124942.9	4	0.966404	32.0962	28.6431	31.0549	20.6261	8.95755	4.95731	5.80423	2.80635	2.31135
AHNAK2	ENSG00000185567.6	2	0.953016	0.793014	1.08162	0.77179	1.13214	1.37969	0.235586	0.703193	0.306402	0.0450764
AHR	ENSG00000106546.8	1	0.97826	10.1649	8.28609	9.78723	73.2181	104.977	102.194	72.0402	43.3271	45.6399
AHRR	ENSG00000063438.12	5	0.407693	6.86869	3.05541	4.81587	5.86266	3.26964	1.82604	20.7741	4.99555	4.5596
AHSA1	ENSG00000100591.3	3	0.994828	13.6767	12.3562	13.6857	41.3362	58.4319	78.4294	87.883	91.9154	114.245
AIF1	ENSG00000204472.8	5	0.983481	14.6657	13.2373	18.4827	11.0329	8.554	7.16762	32.3928	49.8503	52.2752
AIF1L	ENSG00000126878.8	5	0.469587	1.62833	1.61749	1.59704	2.64836	3.78092	1.20935	2.88077	5.27068	1.864
AIFM1	ENSG00000156709.9	5	0.938263	9.18535	8.54102	9.60498	13.0732	13.4463	15.1395	35.0448	40.451	45.4715
AIMP1	ENSG00000164022.12	1	0.907756	16.8179	13.5087	14.1983	30.1229	37.4186	47.3077	33.8144	33.9117	40.1708
AIMP2	ENSG00000106305.5	3	0.992487	6.24767	8.72564	7.378	34.4428	56.6854	63.6217	66.5471	75.6396	87.9658
AIP	ENSG00000110711.5	5	0.926918	61.9804	67.9855	73.1348	57.1362	68.0064	76.9715	111.975	132.615	123.48
AJAP1	ENSG00000196581.6	2	0.889998	2.24909	1.88425	1.23576	1.52519	1.4798	0.336229	0.601931	0.331611	0.0795768
AK1	ENSG00000106992.13	4	0.898118	4.11431	3.80635	3.4424	3.16041	2.30673	0.659477	1.01153	0.8569	0.44945
AK2	ENSG00000004455.12	3	0.981526	19.3831	17.4877	20.5865	45.9465	74.3805	89.3008	81.4794	98.7115	103.514
AK3	ENSG00000147853.12	4	0.579067	24.5065	18.6837	20.2172	14.4657	8.79893	9.9681	14.9085	18.909	23.6417
AK4	ENSG00000162433.10	3	0.856665	0.965326	0.844289	1.00034	1.1951	1.66294	1.45226	1.96433	2.92027	2.17264
AK5	ENSG00000154027.14	4	0.909925	6.73994	8.39995	12.3371	3.07279	2.35297	1.00272	2.45885	3.25487	2.55392
AKAP1	ENSG00000121057.8	1	0.913464	12.2101	14.3785	17.0828	37.2026	59.8042	69.0071	48.4237	49.7227	54.7408
AKAP11	ENSG00000023516.7	3	0.91138	31.6029	23.3985	30.4949	36.3178	35.8248	43.079	40.8018	37.9009	47.0202
AKAP7	ENSG00000118507.11	4	0.993275	8.6145	7.06685	8.22348	4.77524	2.68729	1.36095	2.06115	2.20179	2.36694
AKAP8	ENSG00000105127.4	1	0.985121	18.6714	17.1766	18.7435	27.1343	36.8866	39.2332	27.6641	25.6499	26.5236
AKIP1	ENSG00000166452.7	5	0.877979	5.17762	3.96863	3.95507	3.46977	2.37281	1.31092	4.85928	6.39236	6.62188
AKIRIN1	ENSG00000174574.11	1	0.981225	39.0703	35.044	35.5842	75.2088	95.8598	93.2625	75.1168	64.2138	68.9287
AKIRIN2	ENSG00000135334.8	1	0.975616	32.0415	32.6463	31.77	44.6323	47.6029	53.9224	43.9325	42.0334	44.1442
AKNA	ENSG00000106948.12	4	0.969676	108.924	118.308	126.378	64.7158	36.9256	31.362	55.4175	56.6793	56.4266
AKR1A1	ENSG00000117448.9	3	0.970729	11.5286	10.5233	10.1743	38.5278	56.4964	59.0434	60.9235	68.3799	65.0321
AKR1B1	ENSG00000085662.9	5	0.892004	30.027	31.5589	33.5072	21.4861	16.348	16.6271	38.6839	42.5121	43.6165
AKR1C3	ENSG00000196139.7	4	0.821179	3.64118	1.54351	2.88071	2.98762	1.26989	0.443532	0.76534	0.294157	0.108909
AKR7A2	ENSG00000053371.8	5	0.864387	12.3221	15.1359	17.4037	8.35763	6.29567	3.61161	17.744	22.1991	21.3591
AKT1	ENSG00000142208.11	5	0.990347	14.9904	12.2632	14.1754	12.4765	11.0048	11.0909	26.9895	32.5505	32.0545
AKT1S1	ENSG00000204673.6	5	0.909398	8.10245	8.75096	9.38972	9.85538	10.3	9.79268	13.1613	14.4197	16.742
AKT2	ENSG00000105221.12	3	0.967483	15.8298	17.7139	18.6944	20.7248	22.9999	25.3884	24.9408	24.8143	29.2759
AKT3-IT1	ENSG00000228939.1	4	0.812941	5.10037	2.97007	3.58418	4.68287	1.34349	0.874795	1.49087	0.368367	0.0681922
AKTIP	ENSG00000166971.12	4	0.984055	19.5238	18.5635	22.3119	7.82572	3.45252	2.14455	4.8711	5.2865	5.70646
AL109763.2	ENSG00000224141.1	2	0.932608	1.11153	0.938729	1.56407	1.91177	1.50136	0.345613	0.463848	0.209569	0
AL161915.1	ENSG00000212670.1	4	0.973296	7.53765	7.03316	7.79454	4.17413	3.11648	1.66286	3.8096	4.01613	3.85575
AL357673.1	ENSG00000248835.2	5	0.96809	3.60671	4.22534	4.26673	2.82632	2.38292	1.39537	6.05563	7.5035	7.58024
AL359091.2	ENSG00000268211.1	2	0.87716	2.39608	2.07953	1.0038	2.0887	1.61256	0.517221	0.782891	0.412667	0.133688
AL450992.2	ENSG00000234614.1	3	0.926639	2.18536	2.86605	2.99626	16.6577	28.2384	28.4034	22.7541	32.5941	28.1486
AL590452.1	ENSG00000268172.1	2	0.853174	4.46601	2.73712	4.87271	4.40277	2.99078	1.6368	1.54569	0.555506	0.42848
AL592284.1	ENSG00000231360.2	4	0.855849	6.42119	6.28076	4.39589	6.18402	1.84951	0.983499	1.70606	1.38442	0.887134
AL592494.5	ENSG00000227082.1	4	0.853707	2.1602	1.09487	1.97805	1.37122	1.21933	0.205839	0.473583	0.332838	0.0673915
ALAD	ENSG00000148218.11	4	0.636642	16.206	14.3553	15.5586	8.65464	4.95173	3.28534	14.2285	13.4307	13.8908
ALAS1	ENSG00000023330.10	3	0.934837	18.2801	18.5684	22.0535	31.0798	39.5184	47.3789	82.7276	84.6493	102.152
ALCAM	ENSG00000170017.8	1	0.886178	2.39341	2.13891	1.53697	5.23346	9.75817	9.95383	4.79793	8.44127	6.68865
ALDH16A1	ENSG00000161618.5	5	0.912471	7.63955	6.7981	6.694	6.12209	4.33835	2.87897	9.37954	11.7639	9.5371
ALDH18A1	ENSG00000059573.4	1	0.910425	15.2865	14.1724	15.6078	59.8027	109.979	129.443	81.8161	92.3328	95.8447
ALDH1A1	ENSG00000165092.8	2	0.952021	2.08995	1.6768	1.50777	1.60515	2.1942	0.35277	1.01454	0.38771	0.0742479
ALDH1B1	ENSG00000137124.6	5	0.958934	3.93955	4.64653	3.92846	4.85484	9.09414	4.13031	29.0992	41.344	35.8878
ALDH1L1	ENSG00000144908.9	2	0.970352	1.40268	1.82378	1.43197	2.03479	2.25893	0.506005	1.13888	0.636441	0.0874632
ALDH3A2	ENSG00000072210.14	5	0.805552	7.53521	7.57022	7.16143	4.47161	3.45764	2.03125	7.84868	9.68599	9.11278
ALDH4A1	ENSG00000159423.12	5	0.76676	1.22274	1.59647	1.37068	1.45921	1.26489	0.667848	1.93375	2.35539	1.51081
ALDH5A1	ENSG00000112294.8	5	0.789375	16.0884	14.8226	14.7419	10.4031	7.21973	7.10351	17.2728	17.5107	18.0776
ALDH6A1	ENSG00000119711.8	4	0.976752	8.98997	9.27139	9.41895	3.85252	2.24299	0.850073	2.89188	3.59795	2.99776
ALDH9A1	ENSG00000143149.8	3	0.902834	11.6226	14.6476	12.2727	12.984	17.7276	17.014	18.9463	21.3935	24.2461
ALDOA	ENSG00000149925.12	3	0.922153	84.2729	76.4477	83.1332	181.362	252.396	329.24	585.517	759.493	777.372
ALDOC	ENSG00000109107.9	5	0.983987	12.7533	12.3241	13.0312	9.89169	5.79499	4.47944	28.2331	46.1155	44.4425
ALG1	ENSG00000033011.7	3	0.969095	7.35058	7.62249	8.57423	13.4983	18.71	22.286	20.0738	19.7095	23.3797
ALG14	ENSG00000172339.9	5	0.827996	1.04196	0.805869	0.813167	1.19148	1.13307	0.865966	1.26523	1.46299	1.42002
ALG1L	ENSG00000189366.5	2	0.967173	2.11332	2.9672	2.40652	2.78473	3.57462	1.12365	1.01734	0.425842	0.262773
ALG2	ENSG00000119523.8	1	0.935207	15.585	14.1701	15.2629	32.1362	38.1256	51.4831	22.5189	19.6325	20.3724
ALG3	ENSG00000214160.5	3	0.915005	13.0882	15.2932	17.2639	47.5004	68.8054	79.9914	60.0227	62.4667	73.5233
ALG5	ENSG00000120697.4	1	0.915156	7.40503	6.33776	6.87186	16.1027	19.6282	24.3015	18.949	18.2807	19.2346
ALG8	ENSG00000159063.8	3	0.989157	12.4792	11.3776	12.5036	23.0085	22.354	27.8434	32.7817	30.3035	35.562
ALKBH1	ENSG00000100601.5	3	0.936353	11.485	9.89849	11.4318	13.8727	16.468	18.6767	16.6	16.1785	18.3839
ALKBH2	ENSG00000189046.6	3	0.968203	6.0253	5.37132	6.40828	12.3505	16.4871	19.0505	28.1207	31.8937	34.2071
ALKBH3	ENSG00000166199.8	3	0.943967	13.878	10.8612	15.0205	16.8601	17.9043	20.5288	27.2755	26.9129	32.7584
ALKBH5	ENSG00000091542.8	5	0.900919	54.3963	53.6712	60.5969	57.5395	59.7847	69.1085	91.5304	93.5394	110.673
ALKBH7	ENSG00000125652.3	4	0.909996	31.2005	30.8763	29.6675	19.6762	11.168	6.30695	18.6454	20.9413	18.6126
ALKBH8	ENSG00000137760.10	1	0.888215	6.305	5.60383	6.65452	8.97479	10.7022	13.4273	10.7231	9.39128	11.8848
ALOX12	ENSG00000108839.7	2	0.981772	2.24358	2.70661	2.25382	3.39341	3.29996	0.461029	1.49162	0.655204	0.161722
ALOX5	ENSG00000012779.6	2	0.982473	2.37755	2.70853	2.62856	3.26067	2.80042	0.518204	1.60797	0.764885	0.133942
ALOX5AP	ENSG00000132965.5	4	0.846144	18.9235	14.7256	18.4876	10.6081	4.72507	2.28079	8.49495	12.0729	13.7192
ALPK2	ENSG00000198796.6	2	0.929058	1.01016	1.22113	0.919894	1.62584	1.91488	0.559482	0.791745	0.323098	0.119624
ALS2CL	ENSG00000178038.12	4	0.966242	8.7531	10.8412	10.825	5.62345	3.97695	1.49253	2.5797	3.1373	2.59248
ALYREF	ENSG00000183684.6	3	0.974221	9.79196	9.82029	10.442	31.5909	45.7534	54.8292	83.2454	92.4886	98.4519
AMD1	ENSG00000123505.10	1	0.973985	55.3874	45.983	55.3234	206.952	335.449	416.609	182.946	206.642	246.197
AMER1	ENSG00000184675.5	3	0.928534	5.16834	5.49651	5.90586	6.17047	7.90944	9.1005	8.05085	8.22867	8.86082
AMER3	ENSG00000178171.6	2	0.965432	0.936021	1.3429	1.04272	1.05524	1.21322	0.238089	0.596375	0.390031	0.0323295
AMICA1	ENSG00000160593.13	1	0.970862	22.5951	23.3161	28.063	62.3198	67.8188	73.6606	43.7868	32.4914	44.5054
AMIGO1	ENSG00000181754.6	4	0.959381	24.7874	28.7397	33.4686	9.13417	5.05391	3.58525	3.62428	4.13916	5.44868
AMIGO2	ENSG00000139211.5	1	0.974165	10.8154	8.56089	12.3489	25.341	38.3512	46.3397	21.4688	23.541	28.4556
AMMECR1	ENSG00000101935.5	5	0.935474	6.18767	6.67688	6.5149	5.06414	5.51258	5.01287	8.25817	8.21875	9.84727
AMMECR1L	ENSG00000144233.5	1	0.988129	14.5431	11.5929	12.8085	27.78	30.7412	35.7813	26.2675	20.4166	23.8146
AMN	ENSG00000166126.6	2	0.85963	3.67999	5.52678	5.07618	4.47763	6.15093	4.04526	1.98046	1.27073	0.903011
AMPD2	ENSG00000116337.11	3	0.913711	9.13147	9.99496	12.7305	21.7999	31.7385	39.161	31.2481	28.8458	34.8733
AMPD3	ENSG00000133805.11	4	0.795597	23.5286	14.1906	17.5326	17.0941	5.9159	5.22273	14.1834	11.6124	13.2188
AMT	ENSG00000145020.10	4	0.968126	6.13573	6.09737	6.85128	3.9123	2.8282	0.870405	1.52095	1.27771	0.850272
AMY2B	ENSG00000240038.2	4	0.929535	3.58821	2.45979	2.88969	2.47782	0.980211	0.76475	0.765277	0.396604	0.498875
AMZ2	ENSG00000196704.7	5	0.94184	19.981	17.97	19.1446	24.7515	20.8314	21.5776	34.0745	43.9755	48.9183
ANAPC1	ENSG00000153107.7	3	0.996626	9.72289	7.75984	10.2156	18.4667	24.3821	30.229	31.0939	32.1202	38.592
ANAPC10	ENSG00000164162.8	3	0.787958	4.07561	3.92056	4.85933	6.63452	4.68965	6.42074	7.45847	6.21991	6.3547
ANAPC11	ENSG00000141552.13	3	0.933447	4.71855	5.22028	4.98665	8.74378	9.94733	10.1129	17.6278	19.6794	19.101
ANAPC13	ENSG00000129055.8	3	0.943467	15.6853	15.1159	14.7105	19.6138	21.6203	25.7332	37.9836	33.326	40.1573
ANAPC15	ENSG00000110200.4	5	0.970136	10.12	12.3093	12.884	12.4099	13.2508	11.8004	30.3447	36.0942	35.7201
ANAPC5	ENSG00000089053.8	3	0.941368	21.0647	17.1876	20.8106	25.6601	25.4437	34.1848	29.2865	31.8731	36.9459
ANAPC7	ENSG00000196510.8	3	0.960144	8.02622	7.65194	8.55039	12.8631	15.324	15.4461	14.5187	15.5425	16.9559
ANGPTL1	ENSG00000116194.8	2	0.995935	0.649893	0.701909	0.643531	0.790493	0.758122	0.14767	0.26897	0.1567	0.0207202
ANGPTL6	ENSG00000130812.6	3	0.843138	2.10605	2.34682	2.47162	3.74132	6.73339	3.68654	4.48386	6.322	7.7106
ANHX	ENSG00000227059.2	2	0.990239	2.56267	2.52066	2.39119	3.16904	3.07567	0.655083	1.47927	0.904784	0.163408
ANK2	ENSG00000145362.12	2	0.96068	0.929449	1.18976	1.21172	1.52139	1.71625	0.344911	0.830584	0.426652	0.0754974
ANK3	ENSG00000151150.16	2	0.530575	11.1197	9.43352	14.1338	12.8181	10.9768	16.2099	4.75204	3.05654	3.77123
ANKEF1	ENSG00000132623.11	4	0.531975	4.95559	5.34915	5.75449	2.95817	2.53058	1.44619	2.56987	6.31849	5.39472
ANKK1	ENSG00000170209.4	2	0.935029	2.97942	2.8567	2.88542	2.13989	2.74992	0.773705	1.1311	0.747709	0.176413
ANKLE1	ENSG00000160117.10	5	0.945854	1.40616	1.52974	1.652	2.13556	3.00265	2.60483	8.27419	10.9711	12.7923
ANKLE2	ENSG00000176915.10	1	0.966166	9.64285	9.40048	9.94632	16.3996	24.1722	24.9958	17.1772	17.7194	18.8462
ANKMY2	ENSG00000106524.4	4	0.633539	7.89809	6.09763	7.02395	5.37256	3.40722	2.782	5.3339	7.01994	6.91766
ANKRA2	ENSG00000164331.5	4	0.989038	24.4722	21.816	23.9476	15.31	4.92587	4.30894	5.54389	5.7012	5.9002
ANKRD13A	ENSG00000076513.12	5	0.640454	19.8823	17.8274	20.2836	14.0297	9.04513	8.45056	22.3894	18.2984	20.1411
ANKRD13B	ENSG00000198720.8	3	0.978523	2.84893	2.49197	2.88468	13.4807	24.0632	31.0295	25.6944	31.0967	37.031
ANKRD13C	ENSG00000118454.8	3	0.884949	17.1603	14.8336	14.976	20.0022	16.9732	18.9963	23.1172	20.9138	24.767
ANKRD13D	ENSG00000172932.10	4	0.892819	23.2916	19.301	20.7559	12.6208	4.54085	2.56442	11.6247	11.3184	14.7963
ANKRD16	ENSG00000134461.11	1	0.911998	5.7282	4.1552	6.25035	8.41282	9.82858	10.5465	9.57493	7.35885	9.50823
ANKRD17	ENSG00000132466.13	1	0.92446	45.6776	41.0842	47.8746	65.5701	75.0647	85.5217	66.7577	68.1847	76.8058
ANKRD26	ENSG00000107890.12	4	0.927189	9.12436	7.30818	9.43365	5.60359	2.62485	1.56104	4.80511	5.27823	5.33472
ANKRD28	ENSG00000206560.6	1	0.841025	6.14798	4.94775	5.9907	6.85474	8.219	9.74649	7.36536	8.1002	8.86387
ANKRD30BL	ENSG00000163046.11	5	0.892281	1070.04	1093.39	1181.63	973.011	860.765	1055.59	1422.86	1384.35	1799.86
ANKRD32	ENSG00000133302.8	5	0.968148	4.97225	4.33362	4.79463	4.69245	3.32826	3.14731	7.83789	7.29446	8.11094
ANKRD33B	ENSG00000164236.7	3	0.826188	2.1629	3.39177	2.10279	3.39935	5.50493	3.0667	6.9488	5.89916	6.17743
ANKRD34A	ENSG00000181039.7	5	0.932771	2.70895	2.74041	3.49882	5.33888	5.85301	5.88664	15.342	25.2205	29.124
ANKRD36C	ENSG00000174501.10	4	0.800212	10.1307	7.42012	10.484	6.77457	3.82207	3.62431	6.81119	6.78283	8.18824
ANKRD37	ENSG00000186352.4	1	0.85785	1.64847	2.28147	2.70967	4.37915	6.30742	5.60954	3.97715	5.09332	5.8759
ANKRD39	ENSG00000213337.4	5	0.960946	2.50555	2.25671	2.43361	2.25433	1.63826	1.43308	3.29896	3.52307	3.51892
ANKRD40	ENSG00000154945.6	1	0.920337	21.0679	18.3316	20.2016	41.4224	64.4389	66.9683	56.2608	49.3455	54.9007
ANKRD52	ENSG00000139645.9	3	0.964565	27.1192	26.2305	29.1648	36.6603	41.2319	46.6855	64.4503	61.9014	68.4002
ANKRD54	ENSG00000100124.8	5	0.947522	5.9336	5.6846	5.46255	6.77458	7.25346	5.79014	10.8759	11.9862	11.9508
ANKRD55	ENSG00000164512.13	4	0.812844	14.0863	5.87435	27.9818	6.02407	2.09985	2.07625	1.60202	1.57372	2.72379
ANKRD62	ENSG00000181626.10	2	0.986094	0.848488	1.06368	0.945206	1.09942	1.36096	0.167089	0.490549	0.221633	0.0293062
ANKRD9	ENSG00000156381.4	5	0.926025	2.63198	3.83942	2.80366	3.82551	5.4428	3.79306	9.0566	13.8928	12.5286
ANKS1A	ENSG00000064999.12	1	0.816313	8.77513	9.0779	9.28678	10.7878	13.6095	11.3933	12.1467	11.4054	11.2186
ANKS1B	ENSG00000185046.14	2	0.97579	1.06845	1.31052	1.2635	1.70974	1.64092	0.467736	0.892431	0.388946	0.0828339
ANKS6	ENSG00000165138.12	3	0.980989	5.29457	5.46492	6.43863	8.27018	11.6651	12.8998	12.3061	14.2856	15.3572
ANKZF1	ENSG00000163516.9	4	0.947559	31.8197	30.1133	33.862	17.3651	7.10266	4.73038	12.0454	17.9148	17.1812
ANLN	ENSG00000011426.6	5	0.959267	1.10358	0.993262	1.07877	1.25285	1.46892	0.384497	2.82857	5.30917	4.79102
ANO10	ENSG00000160746.8	5	0.753916	4.23133	3.71111	4.85902	3.68035	2.90904	1.43523	5.45794	5.13667	4.62781
ANO2	ENSG00000047617.10	2	0.986507	2.03739	2.29869	2.28364	2.47587	3.02037	0.593463	1.3622	0.684237	0.0938267
ANO4	ENSG00000151572.12	2	0.979458	1.61713	1.33159	1.50016	1.65089	1.84672	0.392202	0.925494	0.388743	0.0634978
ANO6	ENSG00000177119.11	4	0.726472	15.6797	14.3266	14.1864	10.1483	5.5909	5.83376	12.197	11.6048	13.4343
ANO9	ENSG00000185101.8	4	0.90804	10.5795	11.5035	10.4895	7.09314	5.25947	2.39643	6.29435	7.59697	6.75345
ANP32A	ENSG00000140350.11	3	0.995744	13.7784	12.6649	13.2193	22.7855	32.922	36.9031	40.2747	41.3155	47.9808
ANP32B	ENSG00000136938.8	3	0.987776	113.752	106.703	116.144	160.094	222.267	249.739	247.431	248.877	289.399
ANP32E	ENSG00000143401.10	3	0.964467	21.1532	16.1769	18.4709	31.497	37.0277	44.6933	58.204	68.5542	75.6813
ANPEP	ENSG00000166825.9	2	0.914579	4.31329	2.78461	2.5246	3.40559	3.17785	0.649945	1.71096	0.774139	0.123043
ANTXR2	ENSG00000163297.12	2	0.885851	9.09472	8.05691	11.107	13.3158	8.44815	5.39286	1.88861	0.603333	0.310635
ANXA1	ENSG00000135046.9	2	0.866495	12.0104	12.0264	10.951	10.3607	7.09227	4.03251	2.43985	1.47814	1.24449
ANXA11	ENSG00000122359.13	4	0.800824	47.5255	43.4706	48.7026	24.4364	14.3692	12.9097	36.1332	34.4193	33.6353
ANXA2R	ENSG00000177721.3	4	0.980074	30.4986	26.9973	27.2215	18.905	5.64089	3.48661	4.91658	4.84214	4.65548
ANXA5	ENSG00000164111.10	5	0.872838	11.4667	9.72849	6.85709	11.8513	9.68063	6.01237	17.4976	33.3814	20.0563
ANXA6	ENSG00000197043.9	5	0.907368	45.2655	48.4302	68.6305	39.9022	35.3244	46.789	88.8647	95.3388	144.12
ANXA7	ENSG00000138279.11	3	0.997048	36.6755	31.5058	34.2858	56.0192	70.9701	80.6633	88.1	91.2171	98.1533
AOAH	ENSG00000136250.7	4	0.855834	12.3738	12.3387	28.893	5.06853	3.49176	1.94938	2.53617	1.97359	2.17843
AOAH-IT1	ENSG00000230539.1	4	0.820483	3.85966	8.0394	6.46779	3.12978	3.29023	0.6139	2.43812	0.864153	0.184583
AOC2	ENSG00000131480.4	1	0.930694	2.59313	2.79327	3.17005	5.46717	5.86321	7.0735	5.40302	4.48698	6.30271
AP000235.2	ENSG00000226983.2	2	0.986333	0.844665	0.909858	0.898353	0.956374	0.912343	0.147855	0.389785	0.140085	0.0648315
AP000251.3	ENSG00000237594.2	5	0.896632	1.96613	1.97182	3.89377	3.05439	3.74212	0.550206	4.57124	7.27494	6.17612
AP000266.7	ENSG00000232623.1	1	0.945417	2.04614	2.34521	2.31556	8.31974	13.2984	17.0097	5.38024	3.66494	5.45186
AP000479.1	ENSG00000255433.1	2	0.927019	0.733031	0.588121	0.987164	0.896374	0.752493	0.121256	0.381937	0.144426	0.0486113
AP000640.10	ENSG00000254477.1	2	0.892989	1.74186	2.42625	1.2457	1.63219	1.46751	0.400188	0.657664	0.389992	0.120326
AP000692.10	ENSG00000273199.1	2	0.817203	3.19341	2.23215	3.83292	1.63219	3.1608	0.857545	1.20572	0.433324	0.320868
AP000692.9	ENSG00000228107.1	2	0.885701	5.85151	4.00771	4.80497	4.96486	3.49623	0.758841	1.6974	1.21425	0.53238
AP000697.6	ENSG00000224269.1	2	0.826511	3.01101	3.01972	5.71461	6.08369	3.21974	1.6306	0.994741	0.89886	0.103998
AP000997.2	ENSG00000260254.1	2	0.957069	0.941746	1.45225	1.13307	1.34502	1.18127	0.233313	0.739813	0.394495	0.0713502
AP001257.1	ENSG00000254952.1	2	0.906757	1.7675	2.43734	2.84407	1.86324	3.3505	0.652625	0.375381	0.395732	0.0915724
AP001258.4	ENSG00000245571.2	4	0.97314	6.56047	5.96665	5.47723	4.44104	2.17585	0.664962	2.14916	2.07366	1.79942
AP001372.2	ENSG00000254837.1	4	0.984238	4.64031	4.92748	5.47332	2.66163	1.31347	0.947393	1.93237	1.71119	1.20205
AP001432.14	ENSG00000242553.1	3	0.744439	1.63579	1.47647	0.971865	1.55195	2.67148	2.12605	3.61304	2.05096	2.50856
AP001596.6	ENSG00000232692.1	2	0.955584	1.17352	1.78435	1.83675	1.59623	1.72222	0.424918	0.964764	0.271218	0.0627599
AP001607.1	ENSG00000234052.1	2	0.730374	1.09052	2.36964	0.179975	2.49079	2.54427	1.18114	0.411743	0.406936	0.075332
AP001628.6	ENSG00000225218.1	1	0.869624	5.67073	6.5851	8.86614	12.8997	19.149	21.1588	9.29671	6.14773	7.05107
AP001816.1	ENSG00000254531.1	4	0.89638	4.09154	2.91556	5.65076	2.95111	2.13525	0.699713	1.76841	1.06071	0.223135
AP002954.3	ENSG00000255176.1	2	0.754664	1.16438	1.10629	1.0923	3.74695	2.64509	0.977527	0.971807	0.384185	0.1016
AP002954.4	ENSG00000255422.1	4	0.867223	6.0043	3.613	6.14371	5.48559	2.56821	0.591201	1.24685	0.448108	0.0829538
AP003419.16	ENSG00000255949.1	4	0.981683	35.4722	32.4893	33.1537	14.3088	5.48912	4.27678	10.6598	7.21263	10.1265
AP006621.5	ENSG00000255284.1	4	0.932346	7.3093	7.89432	7.55589	6.09643	3.93533	1.56593	2.68391	1.58255	1.43152
AP1AR	ENSG00000138660.7	5	0.838294	6.76733	5.79612	7.19022	6.43092	4.26409	5.28202	9.12003	7.31038	10.5336
AP1B1	ENSG00000100280.12	3	0.927881	15.8833	16.5892	17.758	25.509	30.0588	37.1751	61.5487	69.1057	75.7038
AP1G1	ENSG00000166747.8	3	0.923556	25.9312	21.2821	26.1761	31.7135	28.1348	34.1544	39.0165	33.9087	42.5126
AP1G2	ENSG00000213983.7	4	0.904088	46.7669	48.8935	59.6694	33.0877	15.8831	14.747	29.7551	32.8207	34.5142
AP1M1	ENSG00000072958.4	5	0.822531	36.0723	35.8634	51.4692	32.0765	29.7966	35.3729	43.6382	53.3528	63.5669
AP1S1	ENSG00000106367.9	5	0.988114	7.07459	6.9842	8.9756	7.80738	6.38299	3.52646	37.8129	46.4792	46.4803
AP1S2	ENSG00000182287.9	5	0.822663	8.53465	6.65019	8.63961	7.19086	5.47763	7.1695	8.0769	10.0799	11.7825
AP1S3	ENSG00000152056.12	3	0.977603	1.11191	1.43373	1.04204	4.20713	5.0725	5.57184	5.86993	5.91254	6.56718
AP2A1	ENSG00000196961.8	5	0.99264	13.0908	12.7775	15.2258	12.344	10.6533	9.46321	25.2822	31.3955	34.1267
AP2B1	ENSG00000006125.12	5	0.906144	50.8271	40.7881	49.0657	54.1667	50.9558	57.2901	83.7807	80.9609	92.1514
AP2M1	ENSG00000161203.9	5	0.925339	32.4996	33.491	36.8599	39.3914	43.3189	45.505	77.3032	82.8618	94.2542
AP2S1	ENSG00000042753.7	5	0.923379	16.5729	16.9212	15.6198	23.7853	21.7203	26.3057	48.9372	58.6538	58.2417
AP3B1	ENSG00000132842.9	5	0.914549	12.1133	8.98583	11.9717	12.9289	12.9632	13.2677	21.385	21.1497	22.4168
AP3B2	ENSG00000103723.8	2	0.986881	1.70937	2.02085	2.01771	2.36283	2.65431	0.555087	1.11555	0.664052	0.225214
AP3D1	ENSG00000065000.11	3	0.950938	21.4972	22.4008	22.3814	37.9982	48.4158	51.1618	46.6534	54.1461	51.5044
AP3M1	ENSG00000185009.8	3	0.987507	21.1058	17.484	18.9088	31.1119	33.2559	38.9708	40.9166	37.717	46.0218
AP3M2	ENSG00000070718.7	3	0.937925	13.6211	9.35169	9.99842	21.0598	18.8144	25.6465	22.5287	28.7732	36.7328
AP3S1	ENSG00000177879.10	3	0.968853	8.80399	7.52238	8.24374	10.7389	10.7976	13.4351	16.0278	15.3762	18.234
AP4B1	ENSG00000134262.8	3	0.84772	10.0814	8.01572	10.0545	14.8173	11.5065	13.1886	14.1548	13.3286	15.301
AP4E1	ENSG00000081014.6	3	0.954562	6.3342	5.40197	5.98606	7.46931	7.21377	7.96905	8.23519	7.71721	9.02584
AP4M1	ENSG00000221838.5	5	0.942288	4.73762	4.19128	4.22747	5.18413	3.74043	1.67081	6.93737	7.9292	7.34674
AP5S1	ENSG00000125843.6	5	0.96057	11.1784	10.2911	10.5502	10.1268	8.55752	10.4735	15.4562	20.3351	21.4645
APAF1	ENSG00000120868.9	4	0.986653	9.28016	7.57949	8.63498	5.31132	2.86339	1.39925	3.27419	3.95306	3.8419
APBA1	ENSG00000107282.5	2	0.982815	1.84858	1.81476	1.98518	1.90754	1.95902	0.469143	0.943718	0.501327	0.188849
APBA2	ENSG00000034053.10	4	0.968573	31.8994	37.6175	40.8696	17.8971	9.04291	7.26457	10.2253	11.9829	13.6936
APBA3	ENSG00000011132.7	5	0.68122	11.8804	11.6691	14.2048	16.0744	10.1084	11.948	16.0753	13.8755	17.4881
APBB1	ENSG00000166313.14	4	0.970157	54.9932	53.7727	54.909	26.2755	10.641	7.0144	14.5802	22.4839	24.2253
APBB1IP	ENSG00000077420.11	1	0.82384	52.2416	57.6642	59.2835	104.196	118.867	116.283	57.2738	46.4897	56.7044
APBB3	ENSG00000113108.13	4	0.904059	11.575	11.4123	13.2751	11.3585	6.3261	4.96849	4.07827	3.60669	3.21307
APEH	ENSG00000164062.8	5	0.969969	33.4305	31.2616	37.2524	35.5101	32.4733	37.9393	85.7204	107.325	111.573
APEX1	ENSG00000100823.7	3	0.978575	46.9598	46.5064	53.2581	95.481	131.863	135.617	179.462	211.191	220.543
APEX2	ENSG00000169188.4	5	0.957346	11.8745	8.70158	10.5123	12.9045	12.4454	13.7361	32.6157	42.5026	45.392
APH1A	ENSG00000117362.8	5	0.900367	40.2249	34.9296	42.357	40.1284	38.712	47.7308	62.3566	62.7351	73.3165
APH1B	ENSG00000138613.9	4	0.981004	9.27403	6.81649	9.0606	5.61447	2.94392	1.96655	2.57793	2.36411	2.09838
API5	ENSG00000166181.8	3	0.987058	28.3475	22.12	25.6253	47.3887	58.883	73.0822	67.5325	72.3293	82.7451
APIP	ENSG00000149089.8	3	0.935283	4.55684	3.73768	4.29515	5.29888	6.72226	6.57755	7.63581	9.47321	8.18428
APLP1	ENSG00000105290.7	2	0.97865	2.58254	3.24335	2.8798	3.262	4.04397	0.714746	1.71297	1.18768	0.18322
APLP2	ENSG00000084234.12	3	0.953184	12.3066	11.414	12.7067	15.3824	16.009	15.3241	19.6151	20.2777	20.3178
APMAP	ENSG00000101474.7	1	0.970388	20.1387	17.0336	19.4611	43.5553	45.0846	53.7743	42.481	33.0293	38.7608
APOA1BP	ENSG00000163382.7	3	0.979451	24.2025	22.5514	25.4907	53.3928	95.8385	111.917	113.419	148.416	161.048
APOB	ENSG00000084674.9	2	0.980292	0.728536	0.862965	0.710045	1.0885	1.00377	0.230452	0.526313	0.228617	0.0713286
APOBEC3C	ENSG00000244509.3	5	0.797255	17.6883	12.1694	14.7654	35.1291	9.64799	14.0342	42.8402	35.6833	36.4189
APOBEC3D	ENSG00000243811.3	5	0.822329	9.29153	9.58656	11.2194	15.3264	8.46057	8.80646	17.2631	16.3282	15.4736
APOL1	ENSG00000100342.16	1	0.928958	6.4539	5.74531	6.70188	14.6262	29.9456	26.2042	12.9915	11.4733	10.5896
APOL2	ENSG00000128335.9	3	0.902921	11.2534	11.4577	12.7663	20.3733	26.8257	21.6502	26.754	24.5383	24.1829
APOL6	ENSG00000221963.5	1	0.937722	27.9782	25.716	29.452	68.6621	92.0793	85.9713	38.4972	41.6305	42.8492
APOO	ENSG00000184831.9	5	0.917201	2.14129	3.70256	3.21705	5.29292	8.18274	6.01979	17.8561	20.5655	21.0553
APOOL	ENSG00000155008.9	3	0.899323	7.24913	7.20341	6.65134	7.92222	8.92185	9.42964	10.9229	13.5501	15.2433
APP	ENSG00000142192.16	1	0.950601	16.3316	15.2905	17.4586	27.3284	41.7129	47.7272	23.81	28.3284	33.1286
APPL1	ENSG00000157500.6	5	0.950338	15.0093	12.639	14.3355	11.1432	12.4439	11.861	17.3982	18.8469	19.6704
APPL2	ENSG00000136044.7	4	0.93758	33.8816	21.0937	24.9858	17.9722	8.90792	7.90461	7.21104	6.5043	6.28184
APRT	ENSG00000198931.6	3	0.981037	55.6222	56.824	64.7012	120.801	188.051	215.585	282.257	319.987	336.559
APTX	ENSG00000137074.14	3	0.996651	9.31652	7.47478	9.02526	17.7727	19.1958	23.0107	26.7124	25.5637	30.8543
AQP3	ENSG00000165272.10	4	0.958625	61.1811	77.528	84.7461	19.8446	5.55777	2.62588	4.96875	7.51897	6.201
AQP9	ENSG00000103569.5	2	0.936449	2.36646	2.26782	1.45805	2.21745	2.0244	0.885432	0.625441	0.270804	0.0544905
AQR	ENSG00000021776.6	3	0.927847	23.1202	19.654	23.3159	35.0457	42.4546	47.4926	40.3313	40.2431	46.345
ARAF	ENSG00000078061.8	3	0.908898	39.5994	45.2027	49.7855	45.5906	52.6635	55.7127	57.872	61.1475	66.4075
ARAP1	ENSG00000186635.10	4	0.931653	26.5516	23.6582	25.5934	17.0773	8.82915	7.44867	15.5858	14.8744	17.1776
ARAP2	ENSG00000047365.7	1	0.784668	16.4058	10.3922	14.7745	33.622	40.184	37.6244	11.9931	9.86862	10.7911
ARC	ENSG00000198576.2	1	0.782487	0.980407	1.79549	1.73057	19.1874	18.1745	16.0288	1.56918	1.44111	0.768534
ARCN1	ENSG00000095139.9	3	0.903251	47.1429	44.849	50.0288	100.659	136.285	168.129	126.08	124.818	147.723
AREL1	ENSG00000119682.12	1	0.987711	18.8792	16.8093	18.8327	30.0367	31.1339	36.1488	27.2247	24.0325	27.0397
ARF1	ENSG00000143761.9	3	0.993176	54.4079	53.785	58.9598	100.057	127.089	160.822	169.651	187.415	211.672
ARF3	ENSG00000134287.5	5	0.91296	20.3725	19.374	23.4398	23.8064	27.6136	30.8525	47.1145	57.0348	60.2837
ARF4	ENSG00000168374.6	1	0.947811	20.454	17.0614	20.7082	53.801	69.4776	90.3183	61.8185	55.6733	65.5111
ARF5	ENSG00000004059.6	5	0.978925	40.2346	37.6153	43.2171	39.3467	35.2676	38.5687	77.243	81.9803	83.3617
ARF6	ENSG00000165527.5	3	0.988942	94.5181	90.3187	93.9122	172.539	233.555	247.705	248.112	284.334	306.987
ARFGAP1	ENSG00000101199.8	1	0.972769	15.7511	16.7129	18.2601	28.9625	31.2991	38.9853	23.4747	21.4936	25.7028
ARFGAP2	ENSG00000149182.10	5	0.884091	26.6965	25.2463	28.2136	29.3391	26.5833	28.7167	34.5273	33.1736	35.1065
ARFGAP3	ENSG00000242247.6	1	0.912865	9.66087	8.93188	8.61964	30.4994	44.6387	40.1898	13.8637	14.206	14.3587
ARFGEF2	ENSG00000124198.8	3	0.899547	21.4626	16.966	19.3504	27.8177	28.287	33.9714	28.9797	27.9718	33.5488
ARFIP2	ENSG00000132254.8	3	0.976142	11.7575	11.2868	13.337	19.1434	21.4423	27.7606	24.3321	27.1628	32.6519
ARG2	ENSG00000081181.3	5	0.930068	1.65338	1.48176	1.8462	3.15211	2.5853	1.57947	8.46729	20.5411	23.6056
ARHGAP1	ENSG00000175220.7	5	0.969091	32.2062	32.6746	36.831	23.1256	21.3552	19.4361	49.2177	56.2216	60.0111
ARHGAP10	ENSG00000071205.7	5	0.491076	1.62864	1.56199	1.37784	2.4336	2.16732	0.761325	2.43131	2.2799	1.80881
ARHGAP11A	ENSG00000198826.6	5	0.970942	1.09833	1.59254	1.5724	1.89715	1.66715	0.985029	10.4397	10.4467	12.2472
ARHGAP11B	ENSG00000187951.6	5	0.884671	2.51923	2.07137	2.21026	1.93318	1.87994	0.486982	3.719	3.46303	3.2668
ARHGAP12	ENSG00000165322.13	4	0.9868	16.0281	12.8771	14.4585	8.0261	3.65115	3.25095	4.2955	3.46147	4.07883
ARHGAP17	ENSG00000140750.12	3	0.950336	10.7143	8.92567	11.5971	17.504	16.9022	22.332	22.3678	18.4208	24.5562
ARHGAP18	ENSG00000146376.6	5	0.837102	1.44824	1.32373	0.943938	1.43005	1.77496	0.812265	2.27372	2.07685	2.27184
ARHGAP19	ENSG00000213390.6	5	0.673108	4.98409	4.70774	5.04468	3.63855	2.27089	1.96571	4.58203	5.2055	5.35612
ARHGAP22	ENSG00000128805.10	2	0.965869	1.64278	2.60335	2.30967	2.69679	3.01351	0.718628	1.54117	0.758078	0.0935569
ARHGAP24	ENSG00000138639.13	2	0.966477	1.01109	0.992444	1.0438	1.12255	1.5559	0.247829	0.651822	0.274543	0.0847056
ARHGAP27	ENSG00000159314.7	4	0.827889	17.1281	17.2923	18.262	13.2278	8.77124	6.80543	14.2547	13.0693	14.7261
ARHGAP28	ENSG00000088756.8	2	0.976116	0.835611	0.974119	0.841576	1.24979	1.01643	0.270037	0.606724	0.236658	0.0236812
ARHGAP29	ENSG00000137962.8	2	0.973788	0.48218	0.631944	0.526291	0.722014	0.575263	0.174801	0.356867	0.134946	0.0363364
ARHGAP30	ENSG00000186517.9	4	0.756993	72.6142	80.6239	84.5443	51.4212	22.8668	22.1292	64.2699	60.5185	64.1197
ARHGAP31	ENSG00000031081.6	3	0.895959	3.04566	2.79993	2.86326	12.7852	14.0634	14.9407	12.7365	12.6193	14.6897
ARHGAP31-AS1	ENSG00000241155.1	1	0.795048	0.954209	2.05065	1.88974	6.32277	5.40657	4.67087	2.70206	2.68578	2.03396
ARHGAP35	ENSG00000160007.13	5	0.828826	11.46	8.81518	10.5313	7.94216	7.77399	6.59154	11.7511	11.7164	12.2681
ARHGAP4	ENSG00000089820.11	4	0.788329	42.3628	43.9377	47.035	24.4579	16.4666	13.7878	24.8035	35.0448	37.9659
ARHGAP6	ENSG00000047648.17	2	0.851419	0.692132	1.0412	1.10867	0.633054	1.50793	0.324712	0.363163	0.350947	0.0885919
ARHGAP9	ENSG00000123329.13	4	0.823963	72.4685	77.936	74.0099	50.5445	14.554	13.1634	37.3496	51.4988	60.5812
ARHGDIA	ENSG00000141522.7	3	0.981305	70.8499	78.6952	83.4159	160.958	253.415	309.354	419.343	438.4	495.433
ARHGDIB	ENSG00000111348.4	5	0.899405	694.408	664.234	747.957	449.451	185.282	160.965	830.965	1132.64	1160.09
ARHGEF1	ENSG00000076928.13	4	0.963647	108.164	125.578	143.784	73.0127	30.8832	35.159	47.2361	47.8123	52.9403
ARHGEF10	ENSG00000104728.11	3	0.838815	2.735	2.5453	1.98239	4.27902	6.46369	6.06732	5.41019	6.80114	4.99495
ARHGEF10L	ENSG00000074964.12	2	0.96097	1.75607	2.13077	1.91062	2.97104	2.84516	0.627591	1.52251	0.684411	0.116814
ARHGEF11	ENSG00000132694.14	4	0.959964	14.1829	18.5383	21.6579	7.53283	3.3491	1.01125	2.24148	2.51846	1.86938
ARHGEF12	ENSG00000196914.4	3	0.936831	1.61956	1.41896	1.17344	2.92244	3.14599	2.93829	5.80031	5.72134	6.66052
ARHGEF16	ENSG00000130762.10	2	0.975292	1.55963	2.08552	1.54436	1.9826	2.47932	0.433597	1.09112	0.499822	0.126749
ARHGEF18	ENSG00000104880.13	4	0.956061	21.7188	26.2694	28.5174	10.0239	4.50378	4.64238	6.04974	5.8157	8.60039
ARHGEF2	ENSG00000116584.13	1	0.952291	40.31	40.9729	41.2502	61.1512	71.1807	73.6682	47.8288	46.6554	48.4766
ARHGEF28	ENSG00000214944.5	2	0.977233	0.77343	0.879454	0.949234	1.02202	1.21992	0.263858	0.598433	0.28048	0.05418
ARHGEF3	ENSG00000163947.7	1	0.820629	38.6347	36.8836	37.5413	67.7068	64.9923	67.6582	45.9968	31.2442	38.073
ARHGEF39	ENSG00000137135.13	5	0.657871	1.19159	1.35262	1.10213	1.35275	1.7719	0.363585	1.44611	2.43335	1.5739
ARHGEF40	ENSG00000165801.5	2	0.970015	1.49576	2.2293	1.60454	1.96002	2.16895	0.429558	1.13537	0.623269	0.137767
ARHGEF9	ENSG00000131089.9	4	0.868987	8.19634	8.01551	9.5298	4.40749	3.24163	1.9881	4.94517	6.15888	5.89615
ARID1A	ENSG00000117713.13	5	0.835289	70.7093	71.5228	78.9265	77.7009	74.2857	79.8023	101.516	89.7234	96.7788
ARID3A	ENSG00000116017.6	4	0.828398	4.27345	4.50181	4.73672	3.15464	2.48595	0.950933	3.08148	3.62416	3.42969
ARID4A	ENSG00000032219.14	4	0.995771	19.4557	17.5281	20.3559	10.3436	4.41851	3.43956	6.11722	6.19553	6.21907
ARID4B-IT1	ENSG00000232686.1	4	0.801106	4.40921	2.21098	2.9107	1.54934	1.50018	1.73657	0.624284	0.493596	0.456873
ARID5B	ENSG00000150347.10	1	0.804699	15.1388	20.8252	17.5699	22.9882	78.3092	58.6111	28.8961	46.4078	43.3308
ARIH2	ENSG00000177479.15	3	0.986379	18.0477	17.2912	20.214	27.7159	29.8657	33.1964	32.3282	34.5021	39.5078
ARL1	ENSG00000120805.9	3	0.975491	11.5317	9.26915	12.4676	20.1344	21.2443	30.2784	29.6938	26.3847	34.1154
ARL13B	ENSG00000169379.11	5	0.912543	3.4965	3.07597	2.36892	2.90991	2.52837	2.46429	4.56262	4.19347	5.3561
ARL16	ENSG00000214087.4	3	0.760282	12.6756	15.1102	18.0976	15.9863	21.0527	22.3687	17.1771	20.5626	23.0375
ARL2	ENSG00000213465.3	5	0.945431	6.24488	6.34481	7.5175	8.73449	8.99894	10.007	36.8239	35.3111	39.1463
ARL2BP	ENSG00000102931.3	4	0.979132	67.8405	54.1001	62.6557	30.3538	21.8635	17.7681	19.7549	19.4212	20.1009
ARL3	ENSG00000138175.8	5	0.753738	3.51839	3.70611	3.59351	2.75257	2.14251	1.03276	3.82233	4.47875	3.94376
ARL4A	ENSG00000122644.8	1	0.982003	1.93483	1.50922	2.29434	5.06131	7.21698	7.67682	3.6932	3.63671	3.85126
ARL5A	ENSG00000162980.12	3	0.924515	11.4495	8.82793	11.6385	20.0138	29.106	39.0434	30.6215	27.9827	35.9063
ARL5B	ENSG00000165997.4	1	0.818858	10.6858	8.22722	10.2535	16.7474	19.7598	19.6232	10.1489	7.96083	8.94612
ARL5B-AS1	ENSG00000152487.6	4	0.915345	3.45676	3.59057	3.66742	3.12342	1.51216	0.437609	0.594308	0.110564	0.204676
ARL6	ENSG00000113966.5	5	0.827389	4.70262	5.05579	4.95461	4.60041	5.0469	4.66738	6.49847	5.44131	7.20388
ARL6IP6	ENSG00000177917.6	5	0.821615	8.55943	7.53983	9.25531	6.50624	4.17764	3.33114	8.99035	10.5544	10.6745
ARL8A	ENSG00000143862.3	3	0.866516	20.6078	21.3159	26.0412	20.9059	25.7496	27.5839	31.5706	31.0814	35.8987
ARL8B	ENSG00000134108.8	1	0.986791	21.5567	17.7057	19.9556	38.6263	45.8523	56.9149	33.3242	29.31	36.7938
ARMC1	ENSG00000104442.5	3	0.971662	18.32	15.0188	18.6845	25.7586	28.679	33.9438	42.5479	47.3544	50.7624
ARMC10	ENSG00000170632.9	1	0.898405	8.68462	7.70262	8.69169	16.3693	22.1275	23.2144	20.6429	19.1862	20.5721
ARMC5	ENSG00000140691.12	1	0.992886	3.1754	3.4769	3.7823	8.23105	9.73475	11.0292	6.60273	5.52276	6.44706
ARMC6	ENSG00000105676.9	3	0.967636	5.79242	6.32175	7.0612	25.22	40.4571	45.4642	46.4096	44.8025	46.4019
ARMC8	ENSG00000114098.13	1	0.962095	12.1763	9.68589	12.1856	16.485	18.3633	21.0129	15.973	12.4626	14.907
ARMCX1	ENSG00000126947.7	3	0.706658	1.3508	3.14771	3.3833	2.30348	3.70767	3.94318	3.03759	4.32306	6.20798
ARMCX2	ENSG00000184867.9	4	0.612606	4.45569	4.3735	7.18135	3.27293	3.45592	1.6662	2.91271	4.34062	5.64833
ARMCX3	ENSG00000102401.15	5	0.894217	9.87261	9.43831	10.69	10.3439	9.92499	10.4321	11.7622	14.17	16.534
ARMCX6	ENSG00000198960.6	5	0.96848	8.75577	9.22701	9.92316	7.67967	6.58318	7.8399	13.4236	14.9937	16.7559
ARNT	ENSG00000143437.16	5	0.665723	24.7768	21.5624	25.2065	17.3117	12.015	11.3908	28.0201	24.0366	24.353
ARNT2	ENSG00000172379.14	2	0.979704	1.19773	1.41058	1.24041	1.78387	1.94838	0.389501	0.734339	0.418238	0.0956418
ARNTL	ENSG00000133794.13	4	0.983681	13.6385	12.5265	16.6408	10.1878	4.34171	2.81746	4.53015	4.55918	5.00959
ARNTL2	ENSG00000029153.10	5	0.94912	1.19038	1.02327	1.07769	1.50583	1.30927	0.522413	5.28738	5.39127	4.34173
ARPC1A	ENSG00000241685.4	3	0.902758	19.893	18.3492	20.7853	23.2499	23.3223	27.8283	42.8422	41.9026	47.4576
ARPC1B	ENSG00000130429.8	5	0.975696	16.2896	15.2005	15.8973	17.2621	13.6658	12.4904	53.7552	65.2082	56.281
ARPC2	ENSG00000163466.11	3	0.919106	46.7952	43.4725	45.6697	60.7946	61.2869	68.7846	113.996	105.096	114.561
ARPC3	ENSG00000111229.11	3	0.922775	16.8997	14.1849	15.2029	20.2458	19.8781	20.6657	20.2569	20.2723	23.8455
ARPC4	ENSG00000241553.8	5	0.892013	25.8153	27.7106	26.1696	35.2907	40.6201	44.6391	93.8643	91.6442	89.8777
ARPC5	ENSG00000162704.11	5	0.966487	31.4828	27.2478	25.5205	27.4141	20.7069	22.1285	43.0243	42.9945	47.6739
ARPC5L	ENSG00000136950.9	3	0.984697	6.30693	6.98849	6.26859	12.9485	20.5287	21.5047	29.4314	26.5704	29.8119
ARPP19	ENSG00000128989.6	3	0.991106	35.4287	29.1304	33.7059	47.6537	60.6663	71.9673	71.4077	71.5638	84.0889
ARPP21	ENSG00000172995.12	2	0.928376	1.121	1.33556	1.41883	1.44827	2.07459	0.846498	0.835358	0.441581	0.111789
ARRB1	ENSG00000137486.12	5	0.684035	20.7955	16.9015	18.4496	11.2686	8.71718	11.3017	14.1313	23.2002	23.3856
ARRB2	ENSG00000141480.13	4	0.887623	87.5513	85.7948	86.6172	40.6297	20.9029	21.9192	44.8352	54.7902	55.2135
ARRDC2	ENSG00000105643.5	4	0.967722	70.0372	65.6406	68.8431	49.4268	14.1446	10.9673	9.16311	9.01918	8.43939
ARRDC3	ENSG00000113369.4	4	0.959633	68.5453	52.1974	52.5616	32.8396	8.52696	9.57377	5.9363	4.66272	3.70131
ARRDC4	ENSG00000140450.7	1	0.67976	1.56985	1.9887	1.51357	3.72348	5.06012	3.36804	1.94193	1.03594	0.787638
ARRDC5	ENSG00000205784.2	4	0.963923	27.0554	30.8834	28.8989	17.2439	5.69431	2.36228	2.94102	1.37196	0.68875
ARSA	ENSG00000100299.13	4	0.923836	20.7875	29.9068	32.3955	15.9315	9.59166	7.95345	7.19821	9.39914	11.2678
ARSB	ENSG00000113273.11	3	0.938581	2.86337	2.65806	2.63616	3.8791	6.08692	5.39639	9.07993	9.64283	9.01368
ARV1	ENSG00000173409.9	5	0.926434	7.19187	6.09642	7.24864	7.85218	6.69167	6.75255	15.5892	12.5175	16.6075
ASAP1	ENSG00000153317.10	1	0.985147	12.6184	13.2526	15.12	28.6076	43.488	48.2549	27.5612	24.2302	30.4385
ASB13	ENSG00000196372.8	5	0.896179	6.99635	8.80625	9.36805	4.95669	7.76497	5.87362	10.1225	15.6644	14.0176
ASB2	ENSG00000100628.7	5	0.472365	1.45144	1.87879	1.60435	2.18833	3.32724	0.438709	8.41131	3.39326	1.92366
ASB5	ENSG00000164122.4	2	0.943379	0.732562	1.1545	0.932646	0.772242	1.00105	0.222573	0.486006	0.215564	0.0433752
ASB6	ENSG00000148331.7	3	0.960979	21.247	18.8554	21.7981	25.669	27.6812	29.6337	28.7182	27.6433	32.1232
ASCC1	ENSG00000138303.13	3	0.907772	5.53947	5.7061	5.68351	8.02055	7.70766	7.5802	10.5174	12.4249	14.0593
ASCC2	ENSG00000100325.10	3	0.987524	19.8381	18.9466	21.5177	29.557	29.4883	32.8493	39.2965	38.1457	41.7849
ASCC3	ENSG00000112249.9	3	0.991075	11.9206	8.8863	12.7875	21.4559	26.695	33.8627	40.4495	42.5699	49.2962
ASF1B	ENSG00000105011.4	5	0.935365	2.69507	2.81395	2.88804	2.60754	2.36869	1.28684	24.5888	63.7961	47.1449
ASH2L	ENSG00000129691.11	5	0.932061	9.8198	10.2457	10.8429	10.6612	10.2737	11.1951	14.0324	14.3549	15.5562
ASIC1	ENSG00000110881.7	5	0.927282	2.54665	2.58371	1.84731	3.07479	4.26613	2.45794	6.4735	10.8334	9.96601
ASNA1	ENSG00000198356.7	3	0.980234	13.1814	12.0834	13.3073	30.8303	40.2432	47.0581	68.9948	71.7054	82.1629
ASNS	ENSG00000070669.12	1	0.96995	9.18391	7.54455	11.3817	77.0685	114.773	152.054	39.242	57.557	66.3244
ASNSD1	ENSG00000138381.5	3	0.895034	24.8321	19.3167	24.3872	26.571	42.4011	37.8095	35.8611	41.2988	40.6338
ASPG	ENSG00000166183.11	2	0.982337	2.00749	2.73602	2.77788	3.12008	3.09238	0.699424	1.37015	0.864354	0.11734
ASPHD2	ENSG00000128203.6	3	0.978747	3.75008	4.75198	4.74208	9.00156	17.4097	18.4572	20.9658	22.8853	22.8525
ASPM	ENSG00000066279.12	5	0.956966	0.843812	0.971624	0.835552	1.15308	1.04813	0.253869	2.03103	3.4811	2.8497
ASRGL1	ENSG00000162174.8	5	0.643347	1.6886	2.21456	1.6537	2.03436	2.46767	0.635825	2.57474	2.83342	2.23807
ASTE1	ENSG00000034533.7	4	0.871559	18.9631	15.8068	16.1477	10.4661	8.13616	6.08539	11.4144	12.4482	12.4891
ASTL	ENSG00000188886.3	2	0.617733	2.57137	3.76506	2.95359	5.69237	8.57883	4.89153	3.23295	1.95743	1.27891
ASUN	ENSG00000064102.10	3	0.90903	12.9435	12.1904	12.8923	19.7833	20.2013	27.4321	45.5672	50.5692	64.6928
ASXL1	ENSG00000171456.12	1	0.946292	32.0841	32.485	36.8057	52.009	68.3532	67.5151	39.5182	41.8831	43.9859
ASXL3	ENSG00000141431.5	2	0.981932	0.752572	0.945136	0.906331	0.836218	1.02026	0.260353	0.487652	0.248949	0.0562018
ATAD1	ENSG00000138138.9	1	0.932379	19.9898	15.8341	17.9617	23.8319	26.9168	31.7942	26.2303	21.8218	26.3275
ATAD2	ENSG00000156802.8	5	0.986043	7.76758	6.01631	6.68573	4.59805	2.53712	1.24254	30.3202	47.5178	43.6606
ATAD3A	ENSG00000197785.9	3	0.970498	4.4623	5.75385	5.92809	21.9423	33.7545	39.1996	37.343	37.4935	40.8039
ATAD3B	ENSG00000160072.15	1	0.958454	7.09207	6.63915	8.01191	17.4175	22.2965	26.4492	18.8953	15.9672	20.9403
ATAD5	ENSG00000176208.4	5	0.979432	3.83526	3.81018	4.36916	4.11904	3.07146	3.0755	25.3704	28.9047	32.2705
ATE1	ENSG00000107669.13	3	0.96209	14.2914	11.7991	14.0923	15.0655	17.212	20.4453	22.6053	21.2269	25.8126
ATF1	ENSG00000123268.4	1	0.90352	14.2988	14.2484	14.2796	24.9079	31.5106	35.1585	28.6281	28.6556	31.3887
ATF3	ENSG00000162772.12	1	0.937496	1.97618	2.13108	1.40977	10.4833	14.9472	12.3653	5.99315	5.7091	4.41243
ATF4	ENSG00000128272.10	3	0.92021	83.2346	77.5395	88.5821	245.723	349.246	404.235	292.28	350.875	375.726
ATF5	ENSG00000169136.4	1	0.843254	5.24072	5.94897	5.44604	13.4169	15.6196	15.5656	18.5422	11.0889	13.5579
ATF6	ENSG00000118217.5	1	0.863287	19.7074	16.4559	23.7419	28.0711	31.2771	49.1694	25.418	22.3997	31.3768
ATF6B	ENSG00000213676.6	4	0.84907	52.6634	53.2353	55.1626	37.9498	21.4177	20.4441	39.7105	40.0977	41.8922
ATG3	ENSG00000144848.6	3	0.96867	10.4952	9.61815	10.7784	15.5096	15.9938	19.0779	22.8375	25.3492	29.5497
ATG4A	ENSG00000101844.13	5	0.956414	5.84122	6.12042	6.21569	7.01539	6.57668	6.21499	9.39777	10.007	10.7802
ATG4C	ENSG00000125703.10	5	0.719265	6.67359	5.37626	6.60827	5.21864	2.32911	2.22984	6.83109	6.38086	7.75391
ATG5	ENSG00000057663.8	1	0.906841	12.3126	10.8699	13.2653	16.8642	18.2573	23.7942	18.6115	16.715	19.5234
ATG7	ENSG00000197548.8	3	0.929672	5.45053	4.23976	5.53067	6.76091	6.56043	6.56526	8.38257	7.64544	8.18222
ATG9A	ENSG00000198925.6	4	0.589511	18.1079	18.1917	20.0322	12.8287	6.57363	6.68299	14.0507	18.5343	19.7726
ATHL1	ENSG00000142102.11	2	0.556245	91.1898	127.442	138.384	182.303	186.87	200.11	28.4556	46.0981	49.0023
ATIC	ENSG00000138363.10	3	0.994282	21.835	18.1324	21.5783	82.0491	120.115	138.677	165.419	169.812	178.94
ATL1	ENSG00000198513.7	2	0.892768	3.05247	2.84682	3.25362	2.27501	2.19999	0.48242	1.14516	0.652958	0.177284
ATL2	ENSG00000119787.9	1	0.973651	12.9376	12.1717	13.7938	20.8155	25.6343	31.6326	18.8455	16.3741	19.7242
ATL3	ENSG00000184743.8	1	0.957053	15.5348	12.4481	14.1193	34.8527	48.9996	63.2449	30.6601	18.7238	25.1798
ATM	ENSG00000149311.13	4	0.980592	96.4535	79.0687	100.374	54.3908	18.3763	15.17	12.8416	10.4759	12.7613
ATN1	ENSG00000111676.10	3	0.989148	29.2229	27.4265	31.6785	55.925	61.5737	78.7551	80.1819	75.8264	88.5678
ATOX1	ENSG00000177556.7	3	0.916719	8.34536	7.66933	8.6656	11.262	9.7162	11.6062	15.6871	17.0198	18.5597
ATP10A	ENSG00000206190.7	4	0.631228	21.6346	15.872	22.5851	13.8887	9.82113	11.2209	18.3503	16.1718	19.7205
ATP11A	ENSG00000068650.14	3	0.941307	10.3496	9.4404	10.5528	12.1625	11.8857	12.7777	16.1002	16.0624	16.2519
ATP13A1	ENSG00000105726.12	3	0.961894	21.6511	23.2007	25.6727	30.1142	33.5256	39.7529	38.4425	35.429	41.3417
ATP13A2	ENSG00000159363.13	3	0.938199	14.9136	15.3627	16.1947	17.343	18.8139	18.8266	21.5237	18.7872	20.7183
ATP13A3	ENSG00000133657.10	1	0.978727	14.386	11.0741	12.844	52.6077	68.4632	88.3679	53.8122	42.6717	57.5418
ATP1A1	ENSG00000163399.11	1	0.958656	86.4081	80.1376	82.3491	136.262	179.909	212.317	135.91	144.808	160.681
ATP1A3	ENSG00000105409.11	5	0.776639	3.8931	3.44998	3.73868	4.31625	4.54144	1.64566	5.04643	5.50787	4.97985
ATP1B1	ENSG00000143153.8	1	0.713432	1.94076	2.00199	2.27867	33.611	19.5671	19.082	10.0964	3.4762	2.03396
ATP1B3	ENSG00000069849.6	3	0.888229	11.5214	6.40463	9.84402	79.5355	93.6584	150.192	104.197	89.1057	117.35
ATP2A2	ENSG00000174437.12	3	0.901067	16.3871	12.2514	14.9092	44.5047	62.5029	81.332	63.6091	56.2844	66.2375
ATP2A3	ENSG00000074370.13	4	0.742278	67.0725	59.9858	68.1212	32.2576	9.87062	6.98963	39.7613	55.1589	52.8266
ATP2B2	ENSG00000157087.12	2	0.977838	1.48951	1.77915	1.38378	1.81718	2.12802	0.425153	1.0758	0.588293	0.0763028
ATP2B3	ENSG00000067842.13	2	0.79749	0.711287	2.3212	1.74404	1.13067	2.73946	0.413543	0.620237	0.662289	0.084231
ATP2B4	ENSG00000058668.10	4	0.992378	22.9868	18.5954	20.691	9.90678	3.80737	1.63871	3.96452	4.36492	3.61222
ATP2C1	ENSG00000017260.15	3	0.951855	10.8357	7.92786	10.552	15.3003	14.7566	17.3494	18.4159	16.0472	19.1089
ATP5A1	ENSG00000152234.11	5	0.925511	34.4635	33.0181	33.2613	38.939	47.717	53.9931	102.394	121.449	130.287
ATP5B	ENSG00000110955.4	3	0.94876	80.2603	79.0632	80.7374	169.334	245.047	308.204	475.133	570.8	648.509
ATP5C1	ENSG00000165629.15	3	0.986595	34.829	29.9501	32.5501	57.3465	72.5913	80.6346	108.499	109.967	124.483
ATP5D	ENSG00000099624.3	5	0.903018	20.2706	21.5072	22.661	24.6039	32.7072	39.8436	72.1213	78.9608	92.0723
ATP5E	ENSG00000124172.5	3	0.956872	18.8674	19.8206	17.7297	24.2276	29.4427	29.3023	34.5187	31.8847	31.6514
ATP5EP2	ENSG00000180389.6	3	0.995659	40.6525	38.3328	44.4113	64.9804	70.6183	85.8854	88.715	91.8098	105.675
ATP5F1	ENSG00000116459.6	3	0.939952	13.5776	12.4317	12.8471	20.4093	24.462	27.4953	44.8417	49.0217	55.2643
ATP5G1	ENSG00000159199.9	3	0.909609	11.1246	9.16683	11.1768	23.1457	35.2889	34.1484	78.6625	96.9199	98.9847
ATP5G2	ENSG00000135390.13	5	0.941334	40.6016	41.9161	42.6101	44.2612	46.841	49.547	80.1852	86.2566	92.2152
ATP5G3	ENSG00000154518.5	3	0.935418	5.65818	4.70573	5.59038	10.4613	12.8789	14.6458	27.4051	29.7691	34.0802
ATP5H	ENSG00000167863.7	5	0.981648	19.429	18.8515	16.5537	17.5118	17.0138	13.6712	29.0445	30.6859	30.5634
ATP5I	ENSG00000169020.5	3	0.901062	22.8036	27.7702	26.6126	35.9627	45.4964	54.2616	93.3753	109.405	137.834
ATP5J	ENSG00000154723.8	3	0.909727	9.24304	8.72695	8.41046	14.5278	14.5707	17.6608	36.4311	33.1486	37.3089
ATP5J2	ENSG00000241468.3	3	0.930365	11.1903	10.9989	11.0807	14.9708	19.8626	24.5989	32.5511	39.0547	48.8768
ATP5L	ENSG00000167283.3	3	0.861524	9.67518	8.89457	9.03159	10.2258	9.66988	10.4047	11.9008	11.5644	14.4008
ATP5O	ENSG00000241837.2	5	0.854066	9.94417	8.46421	7.14527	9.00446	7.58476	6.92925	13.9207	11.6574	11.7941
ATP5SL	ENSG00000105341.14	3	0.959062	9.68852	10.9628	10.2666	17.8272	20.407	22.7574	35.2095	36.6981	39.609
ATP6AP1	ENSG00000071553.12	5	0.847517	21.7355	22.8638	25.2995	18.6717	18.1021	15.7321	25.9117	26.4534	27.4305
ATP6V0A1	ENSG00000033627.10	3	0.935965	3.34257	3.41446	4.24674	5.15053	5.18388	5.86916	5.34533	5.8377	7.24844
ATP6V0A2	ENSG00000185344.9	1	0.937719	5.64026	6.32206	6.47767	10.156	16.898	14.3197	10.6643	10.6548	10.9803
ATP6V0A4	ENSG00000105929.11	2	0.988646	2.17186	2.32617	1.87916	2.71183	2.50895	0.5232	1.26585	0.642059	0.148572
ATP6V0B	ENSG00000117410.9	3	0.990419	10.2266	9.94243	11.842	18.5171	24.2522	25.4175	31.4118	32.4108	33.0214
ATP6V0D1	ENSG00000159720.7	5	0.893792	5.27229	5.70306	5.49761	5.88544	5.15949	3.75728	7.12753	7.71802	6.68444
ATP6V0E1	ENSG00000113732.4	3	0.992647	52.3049	50.1435	54.9067	74.4197	88.2217	109.917	116.947	116.028	135.873
ATP6V0E2	ENSG00000171130.13	5	0.798465	30.1236	30.1084	29.9299	11.4642	4.07984	2.32258	33.8461	41.0842	39.3607
ATP6V0E2-AS1	ENSG00000204934.6	4	0.989635	12.7682	13.5828	14.5883	6.48467	2.71358	0.900904	2.63485	3.63416	2.92456
ATP6V1A	ENSG00000114573.5	5	0.961391	8.55584	9.19586	8.89898	10.8721	9.88396	9.73696	33.1583	34.1244	42.4714
ATP6V1B1	ENSG00000116039.7	2	0.976837	1.82754	2.41162	1.80965	2.12933	2.84252	0.549307	0.998705	0.574281	0.106311
ATP6V1B2	ENSG00000147416.6	3	0.985231	13.2772	11.22	12.1666	25.159	29.2373	38.6599	40.9811	35.6867	43.6091
ATP6V1D	ENSG00000100554.7	3	0.803837	4.62222	4.25431	5.15158	6.24366	5.69543	5.39049	8.35195	6.31684	7.10747
ATP6V1E1	ENSG00000131100.8	3	0.977943	20.8415	19.9988	19.5886	26.9954	32.2826	35.3893	43.7044	46.5917	50.3146
ATP6V1F	ENSG00000128524.4	5	0.918971	53.473	50.4922	54.1239	63.7566	72.6906	85.0274	148.185	176.06	202.015
ATP6V1G2	ENSG00000213760.6	2	0.915766	3.2091	3.81438	4.35461	3.38292	3.23514	0.772389	1.1892	1.08218	0.738934
ATP8A2	ENSG00000132932.12	4	0.780561	2.47031	3.29501	3.22889	2.36106	2.08443	0.53025	2.43901	2.20866	1.77471
ATP8B2	ENSG00000143515.12	5	0.766523	51.4949	58.888	60.6462	26.4315	21.0981	23.4404	51.8448	71.1582	76.6846
ATP8B4	ENSG00000104043.10	2	0.938745	1.06512	1.10748	1.04694	1.60166	1.7998	0.675519	0.71855	0.448892	0.152564
ATP9A	ENSG00000054793.9	2	0.992916	1.69774	2.02062	1.80265	2.21017	2.12364	0.622336	1.17003	0.664053	0.16108
ATPAF1	ENSG00000123472.8	5	0.984982	8.9815	6.80464	7.88058	7.73932	6.80931	6.33706	14.1522	14.6186	16.1935
ATPAF2	ENSG00000171953.11	3	0.893735	5.77876	4.82957	5.5254	8.34798	8.43532	8.03817	8.43303	8.08471	8.68712
ATPIF1	ENSG00000130770.13	5	0.761369	50.9601	46.2767	54.3604	29.9029	15.9208	15.1773	48.8018	60.7373	62.7625
ATR	ENSG00000175054.10	3	0.95988	12.4637	9.41408	12.0856	16.045	16.6039	19.0336	18.8131	21.2362	26.1001
ATRAID	ENSG00000138085.12	5	0.955845	38.8019	35.9565	46.2651	34.1086	26.195	27.2292	59.3405	58.709	70.8774
ATRIP	ENSG00000164053.13	5	0.985638	8.83718	6.9404	10.0078	9.18464	7.63727	7.10324	15.2544	18.125	17.3233
ATRNL1	ENSG00000107518.12	2	0.987121	0.736121	0.816418	0.728915	1.01336	1.08096	0.209768	0.47085	0.240433	0.0358943
ATXN1	ENSG00000124788.13	1	0.522438	8.55923	5.51052	5.03725	15.4841	10.9235	9.5981	8.96741	3.9875	4.13989
ATXN10	ENSG00000130638.11	1	0.950261	17.0689	14.7756	16.8688	30.6223	41.127	45.3432	34.4626	34.1891	34.7021
ATXN2	ENSG00000204842.10	3	0.886022	11.269	10.0527	11.4368	12.5229	14.4773	13.9713	13.4834	13.2796	14.3536
ATXN2L	ENSG00000168488.14	3	0.928318	57.2867	63.1938	66.0574	122.323	144.586	162.408	136.246	137.877	161.932
ATXN7L1	ENSG00000146776.10	4	0.989016	24.057	21.8127	23.2631	10.3559	3.60062	1.62963	4.52411	6.87855	6.57505
ATXN7L2	ENSG00000162650.11	3	0.987595	5.56018	5.26647	5.73113	9.99171	10.5637	12.198	12.1448	12.5362	14.117
ATXN7L3	ENSG00000087152.11	3	0.898199	23.2028	23.2217	26.7891	29.2974	35.0035	42.0427	37.8048	33.4691	39.2657
AUNIP	ENSG00000127423.6	5	0.970496	0.976465	1.12437	0.501359	1.14373	1.51877	0.363217	7.88561	12.9879	12.5312
AUP1	ENSG00000115307.12	3	0.967251	62.6493	61.9885	72.3967	124.324	164.473	189.81	183.844	171.156	192.191
AURKA	ENSG00000087586.13	5	0.954218	2.41122	2.01031	2.15749	2.23558	2.37222	0.823805	6.48241	6.049	5.56284
AURKAIP1	ENSG00000175756.9	3	0.975933	9.12277	9.3025	8.57928	17.4071	24.435	27.58	39.6302	41.695	47.9507
AURKB	ENSG00000178999.8	5	0.781872	2.09229	2.21279	1.92113	3.04776	2.84011	0.471956	4.11503	12.4011	5.09279
AUTS2	ENSG00000158321.11	2	0.945504	3.41289	2.8987	2.37696	3.15879	2.70496	0.877893	1.16065	0.961553	0.402706
AVEN	ENSG00000169857.3	3	0.922462	4.14013	3.82183	4.42571	8.08403	8.94575	13.2301	13.7221	8.76388	14.0982
AVIL	ENSG00000135407.6	2	0.879209	3.06214	2.57848	3.94753	3.45639	2.39262	0.998387	1.64424	0.87316	0.616625
AVPI1	ENSG00000119986.6	4	0.693398	2.7439	3.80573	4.56694	2.58481	1.36207	0.344901	2.84348	2.92793	3.24243
AXIN2	ENSG00000168646.8	4	0.930806	8.13612	11.7059	11.2499	5.2807	4.39224	1.33464	1.93771	3.3427	2.00839
AXL	ENSG00000167601.7	2	0.981787	1.81543	1.98619	1.78131	2.43569	2.48355	0.390005	1.22444	0.739022	0.0957655
AZIN1	ENSG00000155096.9	3	0.965562	28.4066	21.0679	24.4716	49.4529	54.5236	69.7164	71.2413	58.0999	75.3552
B2M	ENSG00000166710.13	1	0.904792	1190.56	1128.13	1389.54	1579	2301.39	2652.53	1581.53	1773.22	2131.86
B3GALNT1	ENSG00000169255.9	1	0.714859	0.854066	1.12166	1.46992	1.54342	2.1112	1.74195	1.10559	1.63903	1.82893
B3GALNT2	ENSG00000162885.8	5	0.709316	3.10126	2.7364	2.31794	3.22209	3.32204	2.70419	3.68165	3.67205	3.51009
B3GALT1	ENSG00000172318.4	2	0.979958	0.699174	0.956178	0.786739	0.837552	0.889757	0.140815	0.341978	0.234811	0.0395166
B3GALT4	ENSG00000235863.2	4	0.983088	11.9911	10.8269	12.7347	6.14847	2.57786	1.79778	2.87238	1.52487	0.960964
B3GALT5	ENSG00000183778.13	2	0.980169	0.851149	1.00389	0.854688	1.02363	1.18868	0.240797	0.655173	0.311348	0.0546556
B3GALT6	ENSG00000176022.3	1	0.982464	10.5679	11.7286	13.4802	32.8431	54.9955	64.214	34.4099	30.2068	34.9272
B3GAT1	ENSG00000109956.8	2	0.937749	1.22845	1.76961	1.12796	1.54614	2.23205	0.329883	0.889688	0.52008	0.120347
B3GAT3	ENSG00000149541.5	5	0.868111	20.3544	16.3025	16.2698	17.4314	17.7774	17.8821	20.456	23.3116	25.9043
B3GNT1	ENSG00000174684.6	5	0.777544	7.9642	7.86373	10.0407	4.28434	3.63958	1.40667	7.23073	11.3973	12.2509
B3GNT2	ENSG00000170340.10	1	0.986267	11.833	10.9131	12.306	35.3847	42.6941	48.0214	25.072	27.9711	32.2609
B3GNT5	ENSG00000176597.7	1	0.954416	0.940477	0.869838	1.11753	5.56296	8.59394	11.0937	3.89415	4.53888	7.61845
B3GNTL1	ENSG00000175711.4	3	0.834362	4.70298	3.50339	3.59355	5.84256	6.30695	5.37452	6.31972	5.90324	5.97566
B4GALT2	ENSG00000117411.12	3	0.960827	1.77867	2.30315	2.02879	6.81175	11.3987	11.7184	15.4289	21.2727	18.9715
B4GALT3	ENSG00000158850.10	3	0.931664	22.7891	23.1794	22.1226	32.0225	42.1691	50.7225	44.1723	40.8186	48.1346
B4GALT5	ENSG00000158470.5	1	0.984367	6.39488	5.87141	5.06583	47.5686	76.2165	87.5315	54.5909	33.3946	37.2264
B4GALT6	ENSG00000118276.7	5	0.940243	0.945834	0.868183	1.14294	1.28436	1.10335	0.549307	2.3061	2.5053	3.84713
B4GALT7	ENSG00000027847.9	1	0.956708	10.255	10.3366	11.5735	17.2166	17.34	21.541	13.7668	12.2686	14.7547
B9D1	ENSG00000108641.10	3	0.604367	1.95626	2.34945	2.00885	2.87692	4.226	1.92619	3.46053	3.73105	3.15316
BABAM1	ENSG00000105393.11	5	0.94407	9.08135	8.84833	8.57644	10.0161	9.0103	9.16452	13.7274	13.4875	13.8905
BACH1	ENSG00000156273.11	1	0.645232	19.1131	11.8061	14.7893	30.8848	25.472	32.7091	10.7684	8.11931	10.2335
BACH1-IT1	ENSG00000248476.1	1	0.745728	5.07672	3.53281	2.46222	10.485	8.46023	10.283	4.3421	2.78362	2.61946
BACH1-IT2	ENSG00000228817.3	1	0.816016	2.77452	1.4645	2.38587	7.54291	5.70659	7.89368	3.10132	2.05976	2.26966
BACH2	ENSG00000112182.10	1	0.924974	51.9788	47.509	49.9466	172.144	212.882	268.479	77.853	65.8913	86.51
BAD	ENSG00000002330.9	5	0.807058	5.77697	6.34309	6.41082	5.3024	3.83428	2.23604	6.74096	8.00587	7.26574
BAG1	ENSG00000107262.12	1	0.945878	5.51675	5.58072	5.759	11.9087	18.4828	19.449	14.0564	13.9485	15.0287
BAG2	ENSG00000112208.10	5	0.892368	3.78874	3.68794	4.02138	3.96786	4.60746	6.27603	8.19026	11.7095	12.4087
BAG4	ENSG00000156735.6	3	0.946089	14.7517	10.9095	12.3479	15.3643	16.0529	19.2273	23.0201	24.3077	26.9126
BAG6	ENSG00000204463.8	3	0.974857	37.3403	41.786	42.4473	57.8707	72.8408	81.7188	96.1572	111.341	119.304
BAHD1	ENSG00000140320.7	1	0.944661	24.1137	24.3805	29.843	34.1865	38.4608	46.1902	35.2218	30.9933	35.2282
BAI2	ENSG00000121753.8	2	0.977845	1.95089	2.61604	2.19226	2.98086	3.22189	0.595696	1.45869	0.824505	0.218046
BAIAP2-AS1	ENSG00000226137.3	4	0.869807	3.74342	3.97728	5.11976	2.6373	3.0049	1.10577	1.31192	0.655566	0.407088
BAIAP2L1	ENSG00000006453.9	1	0.471838	1.57783	1.83131	1.56238	2.93412	3.95003	1.47677	2.28921	2.43714	1.83698
BAIAP2L2	ENSG00000128298.12	2	0.965553	3.87698	3.8882	4.29971	4.61829	3.75378	1.21393	1.47113	0.937473	0.610622
BAK1	ENSG00000030110.8	5	0.867484	11.1814	10.9879	12.0379	15.5842	11.7303	14.9626	27.2638	21.4892	27.7906
BANF1	ENSG00000175334.3	3	0.972368	13.5477	13.4313	14.644	35.6493	54.9515	66.7177	91.9843	108.618	122.676
BAP1	ENSG00000163930.5	3	0.989062	19.3343	20.6897	20.0782	28.3462	29.6403	34.8932	38.8441	37.5768	44.5871
BARD1	ENSG00000138376.6	5	0.986255	3.36764	3.13815	3.44583	2.84004	2.89724	2.05584	9.71901	12.9373	11.7654
BATF	ENSG00000156127.6	1	0.899215	4.16625	5.83221	6.01631	46.9386	108.137	137.322	81.2074	84.3792	100.118
BATF3	ENSG00000123685.4	1	0.78723	1.44224	1.88663	1.64545	10.7417	73.8072	40.1572	17.3483	32.2207	16.9065
BAX	ENSG00000087088.15	3	0.974743	24.1669	19.8181	25.0048	31.9229	38.2791	55.6911	57.5777	58.9374	71.6282
BAZ1A	ENSG00000198604.6	3	0.901886	21.6038	22.6712	24.369	51.5027	66.0097	70.7758	56.8857	57.4469	67.7451
BAZ1B	ENSG00000009954.6	3	0.981106	31.1034	28.9074	32.1126	44.4972	53.7565	62.1365	75.4335	80.2989	93.0446
BBS2	ENSG00000125124.7	4	0.995032	14.7941	13.5783	14.7806	8.13113	3.16592	1.53704	3.3052	2.96051	2.55841
BBS4	ENSG00000140463.9	4	0.703804	7.49571	5.60201	7.30033	5.39049	3.35386	2.92389	6.00138	5.34279	6.59655
BBS7	ENSG00000138686.5	5	0.952946	4.1042	3.1798	4.5873	4.08512	4.27399	4.31862	7.6316	8.53438	9.96554
BBS9	ENSG00000122507.16	4	0.988704	10.9337	8.41797	10.9279	6.66318	3.49089	2.78556	3.89392	3.31409	3.70281
BCAP29	ENSG00000075790.6	5	0.912261	3.44937	2.82023	3.42563	3.81749	2.64321	3.04178	4.64037	4.51146	4.71246
BCAP31	ENSG00000185825.11	3	0.911807	20.5453	21.4484	22.2665	23.0225	28.2318	29.7231	45.92	40.9723	46.3322
BCAS1	ENSG00000064787.8	2	0.977038	1.02744	1.29511	1.26006	1.33151	1.69336	0.317417	0.74204	0.405204	0.105485
BCAS2	ENSG00000116752.5	3	0.986191	23.639	18.6506	20.7491	42.7978	43.4641	49.3624	55.7764	55.3891	59.4917
BCAS3	ENSG00000141376.16	4	0.952889	5.77891	4.96077	5.84778	4.27325	2.63178	1.07981	1.85849	1.33438	0.74006
BCAS4	ENSG00000124243.13	4	0.990834	13.3061	11.7891	14.8329	8.77751	5.80884	3.06239	6.51873	5.17238	5.515
BCAT1	ENSG00000060982.10	1	0.850649	1.12354	1.15969	1.02321	8.10058	8.07435	15.1745	7.018	6.5514	13.5386
BCAT2	ENSG00000105552.10	5	0.918783	5.06293	6.91375	6.82632	8.96092	12.3788	12.3064	29.1498	33.647	34.5972
BCCIP	ENSG00000107949.12	3	0.975077	8.8483	6.93985	8.46215	25.2124	35.0678	40.4452	36.9308	36.5822	46.3202
BCKDHB	ENSG00000083123.10	4	0.699219	9.35214	7.23716	8.02859	4.89656	2.80601	2.07036	6.65885	7.04771	7.15077
BCKDK	ENSG00000103507.9	5	0.915176	10.5694	10.5119	12.5331	13.4815	16.7642	17.0969	30.4276	34.8028	37.2408
BCL11A	ENSG00000119866.16	4	0.743987	4.38766	1.72098	1.87219	2.44806	1.48636	0.588845	1.04751	0.699391	0.472741
BCL11B	ENSG00000127152.13	4	0.965668	152.287	150.729	165.09	74.4858	50.2512	54.6408	53.442	58.2515	71.2872
BCL2	ENSG00000171791.10	1	0.978883	10.6756	12.3314	7.97779	49.9756	68.3776	62.9774	34.0957	29.4378	33.9951
BCL2A1	ENSG00000140379.7	1	0.977936	11.0134	9.71356	7.9665	245.044	443.375	475.895	138.815	156.974	180.68
BCL2L1	ENSG00000171552.8	3	0.886711	6.23712	7.18185	8.15851	129.443	316.153	355.071	266.744	231.236	290.383
BCL2L11	ENSG00000153094.17	1	0.802432	20.5883	16.0623	12.6722	57.7055	75.5521	66.0144	19.1538	10.2257	9.29027
BCL2L12	ENSG00000126453.5	5	0.97715	6.7346	6.16677	5.99215	7.30516	6.54678	4.98773	25.5932	27.1847	31.4932
BCL2L13	ENSG00000099968.13	3	0.970699	10.9731	9.88278	10.2166	13.6641	14.7647	14.1002	17.0884	17.2052	17.1148
BCL2L14	ENSG00000121380.8	1	0.54772	0.948449	1.20151	1.16984	2.17505	2.27103	1.15014	1.74338	1.45293	1.92415
BCL3	ENSG00000069399.8	1	0.560691	7.81868	9.92003	11.4573	28.5711	21.8225	12.8498	13.5814	16.5069	14.0065
BCL6	ENSG00000113916.13	1	0.793602	4.15421	4.25242	4.11354	20.8239	17.7465	15.7493	5.58973	5.73455	5.38508
BCL7A	ENSG00000110987.4	5	0.86722	3.11056	4.58836	3.61914	4.09881	6.41048	3.82844	8.17701	10.4407	8.47139
BCL7B	ENSG00000106635.3	3	0.996077	17.0746	18.7618	18.5483	26.7334	32.4125	35.8376	39.6598	40.4227	45.4577
BCL7C	ENSG00000099385.7	5	0.892297	3.73278	5.33411	4.80703	3.64953	3.99342	2.39949	7.1746	6.81587	6.55727
BCL9	ENSG00000116128.5	1	0.892935	14.0178	14.8556	15.6387	29.4285	40.757	42.2916	33.189	35.6864	39.6266
BCL9L	ENSG00000186174.8	4	0.979154	164.14	121.925	137.855	57.5688	12.7165	10.3138	29.0788	32.58	34.943
BCLAF1	ENSG00000029363.11	1	0.928626	59.0495	45.1631	57.9732	81.8174	98.2232	121.158	93.6896	83.3275	98.4549
BCOR	ENSG00000183337.12	1	0.895159	42.5639	27.4161	29.7698	79.0846	68.856	77.2128	71.0316	51.9452	55.5035
BCORL1	ENSG00000085185.11	1	0.913311	3.58498	4.96095	5.8884	8.0854	20.4633	23.9885	9.40463	10.7322	13.0687
BCS1L	ENSG00000074582.8	3	0.907521	9.79245	11.1588	12.3389	17.4348	20.2623	19.274	40.1188	42.4741	47.0976
BDH1	ENSG00000161267.7	5	0.968237	6.21714	6.53471	7.13611	4.99907	7.38318	5.45979	14.6605	16.6578	15.933
BDH2	ENSG00000164039.10	4	0.989832	6.68821	5.27022	6.29907	4.00234	1.49588	0.86155	2.29264	2.27432	2.30311
BDP1	ENSG00000145734.14	1	0.978951	17.7535	14.451	17.4917	28.0943	32.2378	36.4629	24.5091	19.3355	23.7077
BECN1	ENSG00000126581.8	3	0.959225	13.9148	11.5656	12.7137	18.1046	16.8112	18.5232	19.6125	19.0631	21.3137
BEGAIN	ENSG00000183092.11	5	0.51032	1.46719	2.2554	2.10779	2.35802	3.21262	1.27176	2.79249	2.25638	3.36952
BEND2	ENSG00000177324.9	2	0.898614	0.474793	0.824134	0.669053	0.539011	1.04382	0.237344	0.248212	0.204429	0.0302751
BEND3	ENSG00000178409.9	1	0.977916	1.97758	2.33256	2.54939	16.5989	32.7611	36.9819	14.2007	14.9372	15.3724
BEND5	ENSG00000162373.8	4	0.910441	4.37638	4.94765	5.31844	3.73268	2.87747	0.846154	1.50966	1.17581	0.362777
BEST2	ENSG00000039987.2	2	0.983574	1.96097	2.48248	1.81444	2.47384	2.85004	0.626727	1.00135	0.734145	0.13324
BEST3	ENSG00000127325.14	2	0.977392	0.743648	0.857669	0.895915	0.83619	0.925323	0.161088	0.505394	0.160948	0.0667813
BFAR	ENSG00000103429.6	3	0.849354	21.8717	18.7819	23.3679	24.0179	24.8123	25.2006	33.27	25.8881	31.3381
BHLHE40	ENSG00000134107.4	3	0.913417	3.52481	3.20151	3.18298	63.8919	116.475	77.7029	109.48	186.674	139.744
BICD1	ENSG00000151746.9	5	0.983724	3.88149	3.1547	3.82207	3.51372	2.47435	2.31441	6.21071	6.27389	6.76999
BICD2	ENSG00000185963.9	1	0.967473	16.3584	15.1315	16.3293	23.3135	30.631	36.1546	21.5797	20.1025	22.4577
BID	ENSG00000015475.14	3	0.968519	6.23806	6.54574	6.08167	11.2035	12.9367	13.9336	15.7454	20.3206	19.5509
BIK	ENSG00000100290.2	3	0.694059	3.21321	3.40154	2.56309	6.0218	6.14309	3.37475	6.77366	6.35486	5.29016
BIN1	ENSG00000136717.10	4	0.958644	24.0734	24.3031	23.7891	11.5046	4.86896	2.00167	10.1437	11.9561	9.11786
BIN2	ENSG00000110934.6	4	0.980881	76.0542	80.737	88.444	34.009	13.9756	9.65609	12.8189	12.1567	11.0927
BIRC3	ENSG00000023445.9	1	0.82387	62.3636	41.582	52.6146	171.585	201.065	243.76	42.548	31.2745	43.8101
BIRC5	ENSG00000089685.10	5	0.924033	0.981044	1.90068	1.2143	1.50427	1.92471	0.329306	3.77562	9.29516	7.18969
BIRC8	ENSG00000163098.3	2	0.948597	1.22117	1.2247	0.875641	1.68683	2.014	0.248773	0.62006	0.169704	0.0349063
BIVM	ENSG00000134897.9	5	0.547785	1.65106	1.87454	1.61948	1.54346	1.39909	0.450898	1.78193	1.76462	1.73017
BLM	ENSG00000197299.6	5	0.976853	3.56365	2.89321	3.08067	4.26353	3.64573	2.79875	16.947	23.9807	23.9197
BLMH	ENSG00000108578.10	1	0.902924	16.1752	15.2393	16.3129	37.9891	45.6612	58.5621	46.18	40.0896	50.0197
BLOC1S1	ENSG00000135441.3	5	0.979387	7.59748	6.53832	9.75971	8.87484	5.92844	6.09576	16.1646	23.6994	24.4468
BLOC1S2	ENSG00000196072.7	3	0.947791	11.7127	10.7837	10.3432	18.2575	19.1733	21.9612	30.5572	25.5533	25.5462
BLOC1S6	ENSG00000104164.6	3	0.851215	9.67737	7.32598	8.27198	9.754	9.27881	9.98846	12.1354	10.5679	11.6086
BLVRA	ENSG00000106605.6	3	0.957914	5.9856	4.45529	5.00091	7.59149	11.4555	11.4373	16.314	19.0551	19.4593
BLVRB	ENSG00000090013.5	5	0.916159	3.83157	3.94513	4.19877	6.62415	4.76764	4.2254	10.3002	11.1179	9.46496
BMF	ENSG00000104081.9	2	0.382388	5.94974	6.56208	4.94824	25.3514	11.4401	5.81216	19.687	4.65014	3.97408
BMI1	ENSG00000168283.9	1	0.952636	16.1264	13.4643	15.5949	21.7524	22.6578	24.9911	21.933	17.3505	20.9326
BMP4	ENSG00000125378.11	2	0.937392	2.78753	2.74023	3.55278	2.79304	2.67222	0.570676	1.25046	0.803309	0.183026
BMPER	ENSG00000164619.4	2	0.964384	1.32885	1.79624	2.10249	2.17738	2.39262	0.537593	1.1207	0.504493	0.131706
BMPR1B	ENSG00000138696.6	2	0.994619	0.943325	1.18932	1.05419	1.22172	1.25762	0.238841	0.496087	0.253445	0.0837818
BMPR2	ENSG00000204217.8	4	0.979367	16.7862	12.1724	13.5553	8.27847	2.55304	1.88028	4.75946	3.54214	3.69955
BMS1	ENSG00000165733.7	3	0.957136	11.9259	10.9811	11.8526	32.9389	44.5002	54.9513	51.0508	43.6702	55.3909
BNC2	ENSG00000173068.13	2	0.974766	0.84992	0.933009	0.676693	0.920172	0.991461	0.237486	0.585424	0.244293	0.0404632
BNIP1	ENSG00000113734.13	3	0.988141	4.1136	4.05558	4.45305	11.4658	13.2166	14.2312	16.9398	15.6103	18.0323
BNIP3L	ENSG00000104765.10	4	0.98734	33.3963	26.5805	29.3929	17.8212	4.26211	1.92515	3.83646	5.30613	4.0355
BOD1L2	ENSG00000228075.4	2	0.985924	0.656537	0.895473	0.780133	0.941254	0.919047	0.325809	0.327208	0.176393	0.0217693
BOLA3	ENSG00000163170.7	3	0.919493	3.8272	3.91937	3.84312	7.98378	10.1867	9.68102	22.6063	22.5446	23.2131
BOP1	ENSG00000170727.7	1	0.896766	0.44025	0.976	0.711272	2.34491	3.29764	3.40855	3.1626	2.57317	2.8235
BORA	ENSG00000136122.11	3	0.965762	6.46734	5.83745	5.79413	8.57076	8.08325	9.04247	11.4592	10.9082	11.6284
BPGM	ENSG00000172331.7	4	0.532495	19.029	10.0796	11.4118	11.2659	6.21387	5.38345	11.0236	11.4013	14.8298
BPI	ENSG00000101425.8	2	0.991653	1.5724	1.47081	1.42227	1.84883	1.94008	0.41981	0.873398	0.419753	0.0563986
BPIFB6	ENSG00000167104.7	2	0.994483	2.79138	2.69766	2.56303	3.15658	3.43385	0.689617	1.43717	0.772692	0.147248
BPIFC	ENSG00000184459.4	2	0.976083	1.94824	1.54836	1.67437	1.93752	2.14405	0.434331	1.08256	0.362127	0.0761784
BPNT1	ENSG00000162813.13	5	0.963163	4.47833	3.56016	3.86666	5.15269	3.75882	3.48458	8.3821	8.10695	9.58629
BRAT1	ENSG00000106009.11	5	0.920254	11.5567	12.0013	13.6638	13.6143	15.4691	15.9484	22.9151	30.6767	31.8036
BRCA1	ENSG00000012048.15	5	0.980414	1.68519	1.78281	1.92307	1.70064	1.92987	0.522068	18.2092	25.8913	27.4019
BRCA2	ENSG00000139618.10	5	0.979169	2.65697	2.27859	2.41421	2.14045	1.59375	1.01673	12.4613	13.6856	17.8232
BRCC3	ENSG00000185515.10	5	0.973114	5.6137	5.97846	7.83519	5.46689	6.14318	5.87486	13.0654	16.6386	15.8439
BRD2	ENSG00000204256.8	1	0.990847	86.2435	79.947	89.9109	132.688	153.174	176.208	118.619	108.069	124.602
BRD4	ENSG00000141867.13	1	0.886218	50.4393	49.8483	53.6774	64.7901	70.2677	79.3224	69.679	61.2802	76.4445
BRD7	ENSG00000166164.11	1	0.651606	14.6743	9.66384	12.1701	17.5493	14.3839	15.9952	15.7478	14.5414	16.2327
BRE	ENSG00000158019.16	5	0.984704	9.90539	7.3185	9.75877	9.46381	8.62966	7.48152	17.2699	18.7414	18.6359
BRI3	ENSG00000164713.5	5	0.975626	17.2592	19.251	19.239	18.37	16.0834	16.7244	23.7844	25.5024	27.0088
BRI3BP	ENSG00000184992.10	5	0.952389	4.97724	4.52969	4.8145	5.38172	7.14944	6.87112	19.3188	23.5422	25.2324
BRIP1	ENSG00000136492.4	5	0.964906	1.73507	1.70806	1.66538	1.48119	0.881627	0.364738	5.90795	11.3824	8.74436
BRIX1	ENSG00000113460.8	3	0.969218	5.72052	5.3285	6.1856	20.9721	35.2867	41.0762	37.1086	36.4093	44.1624
BRK1	ENSG00000254999.2	5	0.91786	35.3213	36.6689	35.4538	43.3433	38.5478	48.1736	77.3204	83.7777	106.252
BRMS1	ENSG00000174744.9	3	0.960161	11.0302	11.2996	10.9892	15.1587	17.2877	18.8495	26.8846	26.5746	28.8326
BRMS1L	ENSG00000100916.9	3	0.92437	1.94263	1.94825	2.3775	2.89921	3.1064	2.68218	4.27718	3.97801	4.57768
BRPF1	ENSG00000156983.11	1	0.925145	15.8722	15.4042	16.1321	23.6245	29.9292	32.379	27.1083	25.1123	29.0759
BRS3	ENSG00000102239.4	2	0.915392	0.420351	0.602238	0.654085	0.411468	0.665479	0.177381	0.170045	0.107559	0.0373336
BRWD1	ENSG00000185658.9	4	0.905696	28.2763	18.7862	24.723	18.9448	11.5097	10.8303	7.68582	5.88252	6.19471
BRWD1-IT1	ENSG00000237373.1	4	0.822431	6.95795	2.44233	5.33963	4.4009	1.01459	1.95254	0.689606	0.467352	1.08145
BSG	ENSG00000172270.14	3	0.968591	27.3007	21.9943	26.8994	38.3885	44.823	53.4379	70.7658	54.7999	71.9883
BSPRY	ENSG00000119411.10	5	0.352147	1.78195	2.4436	2.12461	2.30017	5.47251	2.08399	1.89483	7.05114	2.86384
BST2	ENSG00000130303.8	5	0.948519	24.0208	26.3773	30.4095	33.8159	27.4003	35.657	79.1705	98.5758	121.551
BTBD1	ENSG00000064726.5	3	0.98961	17.9344	15.7968	16.9709	25.1002	30.4653	35.8961	35.0471	34.6357	41.6993
BTBD10	ENSG00000148925.6	3	0.858919	10.9521	7.9327	10.9412	12.3406	11.2996	12.049	17.4501	14.4619	16.6543
BTBD19	ENSG00000222009.4	1	0.738864	7.20118	6.78578	7.46569	22.7737	19.8735	21.9996	5.76171	4.58802	4.39691
BTBD2	ENSG00000133243.4	4	0.723594	23.0847	25.8168	28.3974	14.0244	11.7702	9.76744	15.3404	23.2341	22.1331
BTBD3	ENSG00000132640.10	3	0.946923	2.55401	2.39703	2.71835	3.0235	3.34579	3.31625	4.47086	4.42172	4.58524
BTBD6	ENSG00000184887.9	5	0.940668	14.0464	12.5892	12.0427	11.2835	8.17208	5.4832	18.1659	19.6815	19.4258
BTBD8	ENSG00000189195.5	4	0.950811	3.95936	3.22901	3.53285	2.66024	1.77643	0.514088	1.05958	0.896216	0.468869
BTD	ENSG00000169814.8	4	0.924455	7.16496	7.23175	7.14031	4.98695	3.96477	2.97117	2.01592	1.9641	1.82749
BTF3	ENSG00000145741.11	3	0.993302	119.506	101.352	98.7045	162.617	209.836	232.052	257.233	248.112	302.936
BTF3L4	ENSG00000134717.13	1	0.948091	10.2406	8.64119	9.84669	15.9324	18.6523	21.421	17.5352	14.8195	18.137
BTG1	ENSG00000133639.3	2	0.686044	397.211	283.608	309.769	422.659	364.209	411.504	97.3583	63.6563	81.4692
BTG2	ENSG00000159388.5	1	0.682553	220.751	161.362	175.086	379.163	325.32	309.733	246.933	148.364	141.201
BTG3	ENSG00000154640.10	1	0.974785	4.90594	4.88314	4.31004	32.741	47.2466	65.7026	22.729	28.2944	31.1733
BTLA	ENSG00000186265.5	1	0.952725	13.8049	12.7141	13.8292	73.1996	118.336	138.591	92.4516	74.2415	102.381
BTN2A2	ENSG00000124508.12	5	0.61924	3.89541	3.73335	4.37071	5.74617	4.15641	3.24385	4.63066	5.08412	5.32302
BTN3A1	ENSG00000026950.12	4	0.940304	48.2119	54.0416	82.2999	35.1431	12.0567	9.50324	7.09538	9.94288	10.7349
BTN3A2	ENSG00000186470.9	4	0.965193	52.6652	52.4256	68.164	38.2167	15.9103	17.195	17.7761	24.3674	26.6662
BTN3A3	ENSG00000111801.11	4	0.886831	43.1468	50.8555	83.0076	40.571	14.5034	16.4487	16.688	19.6101	25.5474
BTNL9	ENSG00000165810.12	2	0.983259	1.57435	1.76286	1.36218	1.77242	2.17531	0.451502	0.917598	0.52702	0.0570168
BTRC	ENSG00000166167.13	5	0.951904	10.2983	9.56351	10.4022	10.3249	9.54129	9.60309	13.5016	12.544	14.1011
BUB1	ENSG00000169679.10	5	0.984445	1.88962	1.79609	1.9549	2.03656	1.49695	0.81643	12.6984	15.2748	17.0315
BUB1B	ENSG00000156970.8	5	0.974472	1.38728	1.10541	1.26079	1.58262	1.81782	0.359265	12.3771	19.5637	17.1236
BUB3	ENSG00000154473.13	3	0.906262	56.1673	53.7197	58.0105	62.3171	67.07	75.5429	82.6461	104.802	105.711
BUD13	ENSG00000137656.7	3	0.926052	25.6035	26.8818	27.5391	35.9735	40.0792	43.0438	61.8188	73.8542	74.9899
BUD31	ENSG00000106245.5	3	0.98938	14.2542	14.6896	13.7256	34.1952	40.7991	46.7486	53.2927	61.717	62.1744
BX322557.10	ENSG00000215447.3	4	0.980656	22.8989	20.7072	21.261	14.2983	5.7012	4.57427	6.0334	4.59824	4.09682
BYSL	ENSG00000112578.5	3	0.923057	4.65413	5.65425	3.89668	44.0763	70.0941	87.0694	64.5461	64.0976	78.1013
BZW1	ENSG00000082153.13	3	0.942028	18.6678	16.363	18.045	56.5967	75.2462	81.7842	69.0146	76.5516	81.8711
BZW2	ENSG00000136261.10	1	0.94824	17.5371	14.3731	17.7105	69.1734	106.57	132.176	74.8129	80.7341	94.4251
C10orf111	ENSG00000176236.4	2	0.907716	1.78658	2.09037	1.57252	2.09261	1.27362	0.615691	0.674547	0.400003	0.287967
C10orf2	ENSG00000107815.3	1	0.981386	8.68068	9.02192	9.86826	41.8691	66.1604	75.6504	45.5372	40.0653	46.3908
C10orf35	ENSG00000171224.7	5	0.976566	5.11882	5.45052	6.1951	3.93048	4.34945	2.50141	9.77078	10.0458	11.3938
C10orf54	ENSG00000107738.15	1	0.949106	35.9784	35.8662	40.3074	103.919	120.84	143.24	72.5802	46.2002	56.6093
C10orf68	ENSG00000150076.18	2	0.86062	7.99427	6.47747	6.78171	6.1663	5.34515	3.65732	2.0153	1.51702	1.40415
C10orf88	ENSG00000119965.8	3	0.686574	6.13897	4.62427	6.71597	6.61279	6.09806	6.44583	7.59122	6.75834	7.19996
C11orf1	ENSG00000137720.3	5	0.845768	6.72761	5.58916	7.0575	5.14932	4.94708	3.39736	6.67719	7.80475	8.46644
C11orf21	ENSG00000110665.7	4	0.984892	19.6294	16.5779	22.3459	6.91892	2.78845	0.478706	2.26012	1.41508	0.646502
C11orf24	ENSG00000171067.6	5	0.953356	7.39226	6.78749	7.86395	7.68736	9.55557	8.38027	22.2907	22.6679	26.2086
C11orf31	ENSG00000211450.5	3	0.917058	11.3703	11.1665	10.7136	15.4701	14.8702	16.526	24.9559	27.6596	28.1945
C11orf35	ENSG00000185522.4	4	0.948535	6.55207	6.77455	9.21516	5.19551	3.88924	1.19893	2.0524	2.49254	2.46331
C11orf48	ENSG00000162194.8	5	0.926375	11.6193	9.55121	11.2058	11.6596	10.2676	11.2802	19.3856	16.9957	21.5508
C11orf49	ENSG00000149179.9	5	0.921427	3.38984	3.26426	3.66856	3.3679	3.84938	2.06467	4.95245	5.17169	4.98586
C11orf57	ENSG00000150776.13	1	0.970147	8.45436	6.77416	8.26916	13.088	17.2935	19.4983	10.6728	10.4174	11.4312
C11orf58	ENSG00000110696.5	3	0.921396	18.836	15.7339	17.7875	23.4223	20.1198	24.1442	24.434	23.9775	26.6031
C11orf68	ENSG00000175573.6	4	0.985359	51.0076	51.3974	51.5606	30.4495	16.3405	16.2656	18.52	21.413	18.979
C11orf73	ENSG00000149196.11	5	0.93021	8.96164	7.21502	8.06048	9.76196	10.425	11.1916	20.2734	22.3162	25.1131
C11orf80	ENSG00000173715.11	4	0.845367	3.83022	3.66865	4.15495	2.85813	2.08343	0.68647	2.10829	3.20863	2.8718
C11orf82	ENSG00000165490.8	5	0.962672	1.08338	1.40607	1.40407	1.98181	2.43466	2.13659	18.8671	23.9636	30.3227
C11orf83	ENSG00000204922.4	3	0.609694	4.29207	4.01989	3.26657	5.12284	7.07578	4.90367	8.03568	4.87631	5.30742
C11orf84	ENSG00000168005.4	5	0.968175	6.57578	6.89871	7.53164	6.1653	7.67087	7.28629	20.0796	26.2431	28.3852
C12orf10	ENSG00000139637.9	5	0.904193	15.629	17.3742	17.7924	21.6219	23.2939	28.7412	51.342	54.3633	58.2156
C12orf29	ENSG00000133641.13	1	0.968757	5.91763	4.42793	4.88091	8.85013	12.1765	14.1008	7.6284	6.59213	8.23208
C12orf4	ENSG00000047621.7	3	0.990398	7.45726	5.78616	6.87265	11.2017	11.9739	13.3185	14.6209	14.0897	15.7254
C12orf40	ENSG00000180116.11	2	0.981149	0.744808	0.957645	0.869893	1.18779	1.02479	0.157955	0.519162	0.20524	0.0395772
C12orf42	ENSG00000179088.10	4	0.909723	6.22696	6.80632	9.45685	4.13031	2.55055	2.62473	1.13921	0.744083	0.797469
C12orf43	ENSG00000157895.7	3	0.959218	6.6318	6.24544	6.68701	13.6197	16.6282	18.8132	18.9283	16.4416	19.266
C12orf44	ENSG00000123395.10	3	0.943565	5.53069	6.48003	5.68719	16.4256	21.0302	22.8719	21.4893	20.2293	22.9342
C12orf45	ENSG00000151131.5	3	0.887749	8.54193	7.84777	9.7596	26.699	39.9275	45.5939	31.0559	38.3299	38.3006
C12orf49	ENSG00000111412.4	3	0.898059	22.4254	20.8181	24.2421	28.8251	35.4635	44.5555	39.6911	33.3234	40.7953
C12orf5	ENSG00000078237.4	3	0.969289	5.20348	4.63278	4.5742	7.72424	11.0871	11.3867	13.8327	11.4363	13.0282
C12orf52	ENSG00000139405.11	5	0.910345	7.33355	8.18582	7.83615	9.87094	11.9381	12.9485	24.4741	26.4565	30.1551
C12orf55	ENSG00000188596.5	2	0.991079	0.896153	0.86521	0.960225	1.07864	1.12341	0.29237	0.443144	0.31444	0.105331
C12orf66	ENSG00000174206.8	5	0.908839	7.22881	7.7016	9.1173	8.48772	7.17575	7.16399	9.0645	10.5267	11.5136
C12orf73	ENSG00000204954.5	5	0.978691	6.67629	6.08942	7.45432	6.51659	6.50613	6.13543	9.05594	9.5346	10.0437
C12orf75	ENSG00000235162.4	5	0.933904	5.4012	3.83296	5.22322	3.62935	2.35815	1.32488	5.84956	11.6686	10.5517
C12orf79	ENSG00000257242.2	1	0.689578	18.4946	9.80163	11.854	33.8659	34.3938	46.716	5.41592	3.05719	3.67284
C14orf1	ENSG00000133935.6	3	0.956822	13.7299	11.9877	10.3966	20.3652	21.2547	22.6927	35.7508	32.433	37.9735
C14orf119	ENSG00000179933.4	5	0.934739	15.4593	17.503	17.9932	14.0488	9.73338	8.46207	21.4879	25.2094	25.6778
C14orf132	ENSG00000227051.4	4	0.892253	8.32884	7.67827	17.1608	3.21932	1.80616	0.580366	1.00992	1.00411	0.7568
C14orf142	ENSG00000170270.4	5	0.929404	10.909	7.31837	9.70742	11.4999	11.6079	14.5879	25.2975	32.9402	35.4692
C14orf166	ENSG00000087302.4	3	0.994821	16.5457	13.8158	13.4607	26.3165	33.0755	38.8625	44.1697	40.7656	50.4813
C14orf2	ENSG00000156411.5	5	0.905034	13.0269	10.1919	11.7402	16.1482	15.3416	16.9371	26.9576	29.4118	34.4708
C14orf28	ENSG00000179476.3	4	0.969003	4.42475	3.31161	3.74929	2.43664	1.25831	0.559224	0.735574	0.522445	0.510947
C14orf64	ENSG00000246223.4	4	0.988032	35.7256	26.19	31.4164	16.7228	5.63131	3.22988	5.80557	6.00312	5.72523
C14orf80	ENSG00000185347.13	3	0.732156	2.64149	3.05669	3.01803	4.57847	4.37023	2.81346	4.68217	4.77679	4.75826
C14orf93	ENSG00000100802.10	4	0.967346	10.3905	8.92443	9.22624	5.98708	2.71728	1.51529	4.37271	4.76994	4.84897
C15orf39	ENSG00000167173.14	3	0.87326	16.0111	16.4244	18.5644	35.7007	52.7375	77.2458	51.4728	49.9642	60.9144
C15orf41	ENSG00000186073.7	3	0.983059	2.16217	1.88435	2.18775	2.75703	3.81089	3.82092	4.03722	4.21522	4.41035
C15orf61	ENSG00000189227.4	3	0.918608	8.60167	9.23651	9.37782	10.3499	15.0005	12.9865	13.901	16.788	15.7911
C16orf13	ENSG00000130731.11	5	0.928143	24.3966	22.9673	27.7676	24.1415	29.4953	36.916	60.5614	87.5214	91.8189
C16orf45	ENSG00000166780.6	3	0.701999	1.96046	1.52664	1.55302	9.40934	5.24652	6.36327	9.94043	5.34984	6.24234
C16orf46	ENSG00000166455.9	1	0.733346	1.61576	1.76448	1.42218	3.44441	3.85345	2.60912	1.93184	1.67213	1.56261
C16orf54	ENSG00000185905.3	4	0.978843	119.381	125.832	120.038	42.7008	8.67512	3.3631	8.90797	15.7367	14.0885
C16orf59	ENSG00000162062.10	5	0.979305	1.25177	2.21188	1.94782	3.07901	2.71187	0.704304	13.3854	17.9235	17.7636
C16orf70	ENSG00000125149.7	1	0.962478	7.35816	6.7931	7.35674	11.0488	11.5778	12.5525	10.9593	9.09926	10.9283
C16orf74	ENSG00000154102.6	4	0.961807	10.3742	7.00135	8.14864	3.86466	2.1838	0.691226	1.32528	0.401674	0.177813
C16orf80	ENSG00000070761.3	3	0.973792	10.3322	10.506	9.73368	21.8971	23.1431	25.4122	37.893	38.9246	42.1696
C16orf91	ENSG00000174109.3	3	0.906313	3.05347	2.89825	2.75362	6.20781	9.92264	7.53782	8.98628	8.30149	8.76864
C17orf103	ENSG00000154035.6	4	0.967439	10.9906	9.34397	8.90121	5.03816	2.85804	1.02951	1.34848	0.996654	0.77948
C17orf107	ENSG00000205710.3	1	0.821186	2.67063	3.05383	4.00381	10.5508	11.8501	11.5014	3.29358	2.91704	2.8345
C17orf49	ENSG00000258315.1	1	0.699188	1.8773	2.36964	1.85892	7.7112	5.13501	4.78045	2.8963	2.42043	2.65623
C17orf51	ENSG00000212719.6	1	0.946474	3.46652	3.14545	3.3749	5.896	7.9064	9.06374	6.3352	6.94389	6.548
C17orf53	ENSG00000125319.10	5	0.976786	1.44363	1.76008	1.65373	2.26782	2.14633	0.752528	13.3861	19.4819	21.5521
C17orf58	ENSG00000186665.8	5	0.941329	1.21377	1.16859	1.29804	1.63778	2.49199	1.69228	6.84663	13.8269	14.1464
C17orf62	ENSG00000178927.12	5	0.818089	24.7869	21.769	25.7203	18.4196	13.8401	12.9764	23.7473	28.6011	31.2396
C17orf70	ENSG00000185504.12	1	0.928339	12.2216	12.3521	14.1685	23.3504	31.3725	38.5297	28.0716	25.9828	30.8517
C17orf75	ENSG00000108666.5	5	0.931929	5.51795	4.71744	5.22508	5.75327	5.7334	4.47121	7.4626	7.08856	8.14835
C17orf76-AS1	ENSG00000175061.13	3	0.823729	118.778	102.35	93.3032	109.611	117.229	113.645	135.935	125.069	145.167
C17orf80	ENSG00000141219.11	3	0.884692	7.62829	8.10792	8.11382	8.21463	9.21799	8.43106	10.6456	10.4437	10.8315
C17orf85	ENSG00000074356.12	3	0.900793	12.8253	10.6541	12.2578	15.0101	15.6381	17.2986	16.0355	14.9039	17.6493
C17orf89	ENSG00000224877.3	3	0.958799	5.13086	7.74955	7.95762	15.9657	19.903	23.9574	22.2664	19.792	26.2109
C17orf96	ENSG00000179294.5	1	0.982953	2.50412	2.14127	2.53181	85.8893	156.604	182.789	58.2058	65.3666	72.1277
C18orf21	ENSG00000141428.12	3	0.865757	14.2823	12.2604	12.9281	18.6844	19.1069	18.8854	18.9783	17.6628	19.0707
C18orf25	ENSG00000152242.6	1	0.896418	19.1516	16.6542	17.9739	28.4626	30.2593	31.6694	31.6897	25.1237	29.7416
C18orf54	ENSG00000166845.9	5	0.821677	2.51271	1.94726	2.60121	1.55016	0.982605	0.514498	2.72484	2.83208	3.28411
C18orf63	ENSG00000206043.6	2	0.989538	0.729994	0.748745	0.591422	0.856982	0.793502	0.186228	0.357052	0.111437	0.0137528
C18orf8	ENSG00000141452.5	3	0.92476	19.5646	18.4935	20.7648	24.3876	22.7899	24.0466	29.245	32.0347	33.0767
C19orf10	ENSG00000074842.3	1	0.973929	5.93095	4.93133	5.42113	20.8407	27.7337	36.5661	24.2305	17.5011	21.4726
C19orf12	ENSG00000131943.13	3	0.932418	7.38972	7.22582	7.57872	9.12541	11.8838	11.9121	17.5477	16.3206	22.5665
C19orf24	ENSG00000228300.9	3	0.989402	6.9243	9.97054	9.24687	19.2864	31.828	35.5593	39.5393	39.796	51.6324
C19orf35	ENSG00000188305.4	2	0.980606	1.75225	1.84981	1.46113	1.71754	2.04406	0.490353	0.766047	0.646979	0.0637069
C19orf40	ENSG00000131944.5	5	0.925797	2.22522	2.41163	2.02574	2.23225	2.93074	1.12378	3.61812	4.19463	4.56684
C19orf43	ENSG00000123144.6	3	0.896237	66.1922	70.217	70.9513	74.6383	81.8158	93.5148	116.689	139.316	144.467
C19orf47	ENSG00000160392.9	5	0.945547	6.43846	6.49208	7.34298	9.03121	8.10095	7.39093	14.5362	14.806	16.4236
C19orf48	ENSG00000167747.9	3	0.980784	11.9911	11.9734	13.8397	49.5709	72.3171	83.8204	131.886	131.16	138.477
C19orf53	ENSG00000104979.4	3	0.961986	73.6857	82.0371	77.4126	125.261	165.913	191.335	245.588	299.944	319.25
C19orf54	ENSG00000188493.10	5	0.981532	4.96504	5.02995	6.23914	4.96829	4.49827	3.11191	7.63645	9.67183	9.95507
C19orf55	ENSG00000167595.10	5	0.811121	9.53037	11.1352	11.7132	9.59315	7.91867	6.90887	11.8684	12.1767	12.6859
C19orf57	ENSG00000132016.7	5	0.985171	2.17083	2.48812	2.47859	2.66203	2.58402	0.850622	5.15611	6.80448	6.895
C19orf70	ENSG00000174917.4	3	0.953995	11.5617	12.4694	13.4475	19.2008	26.5995	29.6525	42.7433	49.9433	51.1336
C19orf71	ENSG00000183397.5	4	0.858033	9.46524	10.252	15.9959	9.71185	6.62491	3.7279	3.78815	2.03444	1.15077
C1D	ENSG00000197223.7	3	0.732666	3.61052	2.38221	2.7049	4.03144	3.65761	3.70471	4.11651	3.79722	3.84944
C1GALT1C1	ENSG00000171155.7	1	0.856475	14.3436	13.8116	16.6569	19.3905	27.2942	29.5038	20.511	24.9233	27.197
C1orf101	ENSG00000179397.13	2	0.969636	1.70987	1.51771	1.59582	1.78176	1.49023	0.383161	0.801414	0.396029	0.154772
C1orf105	ENSG00000180999.6	2	0.965215	1.77518	1.38469	1.80664	1.76738	2.12834	0.436975	0.614392	0.463695	0.143065
C1orf109	ENSG00000116922.10	1	0.978924	5.42328	5.30396	5.56063	16.624	20.0786	25.6885	17.1326	12.4093	16.9063
C1orf112	ENSG00000000460.12	1	0.936028	4.41771	2.79255	3.96353	13.4488	20.7385	29.9504	14.3976	16.6828	19.2811
C1orf122	ENSG00000197982.12	3	0.978767	5.71902	6.11794	6.83341	10.5303	14.1879	13.4696	19.6712	18.7117	22.7082
C1orf131	ENSG00000143633.8	5	0.940919	7.90424	6.76089	7.71795	9.04469	7.58909	7.33404	11.3827	11.3078	11.678
C1orf132	ENSG00000203709.5	4	0.968158	16.8089	13.6845	19.1259	11.7479	4.72446	3.12811	3.14037	2.6631	2.45596
C1orf145	ENSG00000162913.9	4	0.931152	4.08162	4.35073	4.8269	2.13906	2.42148	0.812963	1.1492	0.898182	0.396345
C1orf159	ENSG00000131591.13	1	0.969864	5.73172	5.59987	6.16857	9.99939	10.2177	10.6911	8.47348	6.8563	8.3705
C1orf162	ENSG00000143110.7	4	0.987541	45.7571	45.3656	53.16	19.2424	6.3092	3.35861	6.90933	7.99488	8.85205
C1orf170	ENSG00000187642.5	2	0.950077	2.12583	2.40886	1.80431	1.77532	2.54427	0.391448	1.09451	0.815932	0.0343285
C1orf172	ENSG00000175707.7	4	0.92623	4.26965	3.80622	5.40226	3.05062	2.54569	1.03699	1.6658	0.870974	0.688197
C1orf173	ENSG00000178965.9	2	0.969158	1.34003	1.55066	1.57188	2.08632	2.30871	0.432368	1.05665	0.443112	0.123898
C1orf174	ENSG00000198912.6	3	0.987122	9.26598	8.76788	9.73194	15.367	21.6408	24.5764	30.2239	30.2162	38.1799
C1orf204	ENSG00000188004.5	4	0.915027	3.87723	3.00161	3.43514	2.72483	2.06308	0.421949	1.27128	0.700561	0.366509
C1orf216	ENSG00000142686.7	3	0.888836	2.85958	2.89136	4.01529	10.2542	10.0074	8.89001	13.1685	9.61414	10.9001
C1orf222	ENSG00000142609.13	2	0.953709	1.55978	1.71171	1.91649	2.48792	2.90554	0.549994	1.147	0.654567	0.12862
C1orf228	ENSG00000198520.6	3	0.683654	14.4276	19.3733	17.0798	25.49	38.205	31.9512	18.9439	50.1319	35.1997
C1orf233	ENSG00000228594.1	5	0.953835	5.54834	7.61012	6.82714	4.55868	5.18738	3.59116	10.6976	17.574	14.9307
C1orf35	ENSG00000143793.8	5	0.892902	5.88397	6.47525	5.74817	6.43164	6.14983	6.22902	8.16317	8.5851	7.70904
C1orf43	ENSG00000143612.14	3	0.987315	30.0118	30.0656	29.6202	51.2242	64.6778	76.6627	94.6686	99.3977	115.256
C1orf51	ENSG00000159208.11	1	0.838093	2.1139	2.30987	2.12445	5.82046	11.2255	14.5575	2.46587	1.73775	1.54308
C1orf54	ENSG00000118292.4	2	0.924753	6.17022	6.88265	6.29686	5.6416	4.92093	1.56224	3.17356	2.02992	0.86116
C1orf63	ENSG00000117616.13	4	0.976094	51.5941	44.3586	47.5363	30.8251	14.6273	14.0032	12.447	11.4648	11.8192
C1orf74	ENSG00000162757.3	5	0.962322	5.07343	4.22205	4.16866	4.60859	5.35168	3.1567	7.30556	9.66731	10.2903
C1orf85	ENSG00000198715.7	4	0.610567	10.9492	10.8486	11.6258	7.00881	3.75485	2.71212	9.90673	10.0539	11.0774
C1orf86	ENSG00000162585.12	5	0.859483	5.62997	6.23557	8.03597	5.64194	7.49386	7.69357	9.7589	11.4033	14.9092
C1orf87	ENSG00000162598.9	2	0.97906	1.00026	1.25395	1.2	1.70333	1.50343	0.363652	0.610072	0.36177	0.055809
C1orf95	ENSG00000203685.5	2	0.96004	1.41932	1.40153	0.8865	1.42714	1.47738	0.406351	0.711076	0.464443	0.0724023
C1QBP	ENSG00000108561.4	3	0.992788	22.2943	20.3495	20.7054	101.611	151.283	190.355	228.099	250.573	312.346
C1QTNF6	ENSG00000133466.9	4	0.97938	11.2891	8.39575	11.438	6.85411	3.44507	1.6603	2.58303	2.23427	1.76696
C1RL	ENSG00000139178.6	4	0.920677	7.66804	6.70342	9.03766	4.77492	2.19668	1.45324	4.12178	4.61871	4.94306
C1RL-AS1	ENSG00000205885.3	5	0.886351	3.9362	4.67551	5.59771	3.70798	3.43564	1.37711	5.5494	7.48783	6.87867
C20orf112	ENSG00000197183.8	4	0.947913	27.0542	26.5185	29.1697	11.1516	6.30143	4.04761	9.79998	13.1587	13.6984
C20orf197	ENSG00000176659.5	5	0.814957	0.529296	0.374701	0.462454	0.65643	0.544801	0.183939	0.564262	0.864396	0.81299
C20orf24	ENSG00000101084.12	3	0.940543	4.71003	4.77989	4.99707	7.80238	7.78375	9.47403	14.7665	12.8303	13.061
C20orf26	ENSG00000089101.13	2	0.977362	1.52247	1.39867	1.53059	1.98473	1.76246	0.460021	1.03996	0.431945	0.120424
C20orf27	ENSG00000101220.13	3	0.944752	6.16384	7.10009	8.51003	14.1464	22.3516	29.0276	46.3187	54.7917	58.4816
C20orf96	ENSG00000196476.7	5	0.783872	4.25083	3.90787	6.13845	3.5942	4.70047	2.17123	5.69259	5.8492	6.58859
C21orf128	ENSG00000184385.2	4	0.903707	1.54945	1.47425	1.96703	1.38209	1.01961	0.187771	0.607517	0.320227	0.181135
C21orf49	ENSG00000205930.4	4	0.954753	4.58936	4.94357	5.62644	3.53247	1.89785	0.545127	1.41647	0.685018	0.241544
C21orf58	ENSG00000160298.13	5	0.562831	4.4651	4.22121	3.91428	2.44627	2.33364	0.671289	3.29014	4.88746	3.84061
C21orf59	ENSG00000159079.14	3	0.995799	5.53036	4.80854	5.62694	6.89962	7.84223	8.28793	8.99399	9.16731	10.1991
C21orf62	ENSG00000205929.5	2	0.978428	1.07306	0.951995	1.18516	1.13119	1.17955	0.329162	0.537603	0.304935	0.0342119
C21orf91	ENSG00000154642.6	1	0.628473	17.2714	11.6981	16.6565	21.4571	17.2194	24.4853	23.38	12.8593	22.7252
C22orf46	ENSG00000184208.10	5	0.754352	5.28744	4.9833	5.53532	4.49936	2.91679	2.07933	5.54708	5.81215	6.23124
C2CD2L	ENSG00000172375.8	5	0.708073	6.92378	8.99918	10.1469	6.97766	6.203	5.32299	7.86342	10.0576	10.6065
C2CD3	ENSG00000168014.12	5	0.880944	11.2765	9.29301	11.1527	13.457	11.4252	10.8086	16.1346	15.4788	15.8645
C2CD4C	ENSG00000183186.6	2	0.942868	1.23555	1.78985	1.44096	2.40235	2.40219	0.827262	0.88635	0.491791	0.136561
C2CD4D	ENSG00000225556.1	5	0.664167	1.35555	1.50513	2.20518	2.39864	2.54137	1.02964	1.83702	3.42521	2.78913
C2orf27B	ENSG00000186825.3	2	0.967643	1.47653	2.51092	2.16133	2.16557	2.4713	0.341335	0.981656	0.517438	0.0266078
C2orf43	ENSG00000118961.10	5	0.913516	8.90982	6.08339	8.2515	10.7552	9.9528	11.4791	21.6822	21.32	26.2952
C2orf44	ENSG00000163026.7	3	0.958824	10.0605	10.9322	10.7721	13.4491	16.7914	18.8625	23.2792	26.7525	28.0797
C2orf47	ENSG00000162972.6	3	0.967359	6.0234	4.46496	4.4085	8.83432	8.0652	9.87095	13.1114	12.4306	13.8937
C2orf68	ENSG00000168887.6	4	0.989304	44.2941	42.0253	46.7235	26.0694	16.9537	13.8356	15.0646	16.7789	19.4452
C2orf69	ENSG00000178074.5	3	0.989475	7.34581	6.2352	7.48958	9.74746	10.4169	11.6974	13.0751	12.6432	15.2724
C2orf76	ENSG00000186132.10	3	0.9433	6.42902	4.73928	5.06023	7.00896	8.26887	7.75856	8.34018	8.39045	9.17824
C2orf81	ENSG00000159239.7	4	0.990182	6.84692	6.75276	7.25815	4.34265	2.28678	0.738508	2.81577	2.01005	1.64855
C3orf14	ENSG00000114405.6	3	0.691841	0.422424	0.80878	1.0077	1.27519	1.11994	0.839426	2.17489	0.902791	2.37954
C3orf18	ENSG00000088543.10	5	0.522575	7.4776	7.36766	8.15783	5.69762	4.74402	1.89104	11.8726	7.73063	6.06801
C3orf62	ENSG00000188315.3	1	0.89766	6.06189	5.0337	6.16006	8.75631	10.7205	10.9943	7.3567	5.64255	5.882
C4orf21	ENSG00000138658.11	5	0.989287	2.91637	2.77482	2.89708	2.53239	2.12628	1.38055	10.2118	13.7791	14.6213
C4orf27	ENSG00000056050.6	5	0.961164	6.63428	5.34654	6.33472	7.11851	7.94641	6.12404	13.4525	17.6918	16.8912
C4orf32	ENSG00000174749.5	1	0.933808	1.7297	1.89763	1.82632	5.93356	12.8311	11.4155	8.11828	7.33028	8.72968
C4orf33	ENSG00000151470.8	4	0.81661	1.84309	1.25255	1.86107	1.32937	0.905273	0.293704	1.14683	1.36285	1.14586
C4orf36	ENSG00000163633.6	4	0.908398	2.17898	1.94247	2.55722	1.49731	1.43097	0.46724	0.886692	0.505929	0.207385
C4orf40	ENSG00000187533.9	2	0.831099	0.430406	0.479612	0.331483	0.537741	0.204552	0.141263	0.225702	0.0499671	0.0132142
C4orf46	ENSG00000205208.4	5	0.953822	3.62592	3.179	3.88399	5.38491	6.09192	5.14646	15.6275	20.9235	21.1343
C4orf48	ENSG00000243449.2	3	0.922741	7.74635	12.6989	10.1782	16.0178	16.335	16.3693	24.8041	21.8129	23.4007
C5AR1	ENSG00000197405.3	2	0.810308	7.37906	4.59635	3.96738	4.77056	3.96771	1.97535	2.90578	0.980948	0.884072
C5AR2	ENSG00000134830.3	2	0.966366	2.25746	2.02249	1.93731	1.90379	2.38761	0.337859	1.15917	0.633472	0.0748522
C5orf15	ENSG00000113583.6	3	0.961716	15.1869	12.3685	15.6663	26.9302	38.9671	42.9662	43.105	36.464	45.7853
C5orf22	ENSG00000082213.13	3	0.960639	14.3739	11.1848	13.2036	18.2045	16.7439	20.3201	23.9946	21.9661	23.9233
C5orf28	ENSG00000151881.10	1	0.813585	8.2785	5.24233	6.31527	9.64969	9.24869	9.48599	8.83872	8.19797	8.25148
C5orf30	ENSG00000181751.5	3	0.884066	2.74159	2.17571	2.43148	2.46286	4.47743	3.87313	5.46817	7.71819	7.23288
C5orf34	ENSG00000172244.4	5	0.844397	5.36751	3.59814	5.20308	2.38242	1.41705	1.55212	5.32777	6.18586	9.80031
C5orf42	ENSG00000197603.9	4	0.970942	7.53676	5.6999	7.33508	4.95526	2.24711	1.20106	3.32058	3.45534	3.3356
C5orf45	ENSG00000161010.10	4	0.992256	13.0094	11.7572	14.0182	8.36891	3.35684	1.89682	3.58959	2.77186	2.77656
C5orf51	ENSG00000205765.4	5	0.922633	22.4712	17.6983	21.6617	19.8423	17.2382	19.9042	28.9372	29.0044	37.6344
C5orf55	ENSG00000221990.2	1	0.616595	3.74184	4.06979	3.80958	6.88902	5.28716	5.16843	6.44706	5.07384	4.60897
C6orf1	ENSG00000186577.7	4	0.73862	8.1283	8.91724	9.48466	4.78714	4.45161	2.20938	5.90017	7.17697	7.89252
C6orf106	ENSG00000196821.5	5	0.953449	35.6056	38.3141	36.6452	32.6479	32.5086	36.1957	48.629	53.0537	57.6977
C6orf136	ENSG00000204564.7	5	0.904239	19.0765	20.5413	21.4746	20.1097	22.3002	24.0347	31.1379	34.4205	40.9482
C6orf211	ENSG00000146476.6	5	0.933939	11.311	7.42997	7.15488	7.68126	5.0858	7.61887	13.4334	16.9012	19.6369
C6orf223	ENSG00000181577.11	5	0.725395	0.868633	1.41561	1.07516	1.92294	2.12791	0.590145	1.50044	2.81998	2.78119
C7	ENSG00000112936.14	2	0.966793	1.2703	1.5353	1.17723	1.32193	1.78581	0.355989	0.931565	0.269826	0.0742503
C7orf26	ENSG00000146576.8	3	0.972385	24.6016	24.9229	26.1824	39.6408	46.5942	53.3468	51.847	47.8907	56.4241
C7orf41	ENSG00000180354.11	4	0.955346	9.21971	7.75756	10.0321	4.96937	3.67618	3.5158	2.07977	2.66484	3.06029
C7orf49	ENSG00000122783.12	5	0.959092	9.69318	9.13007	8.3823	8.66477	8.36596	7.76756	18.8615	18.3444	17.4818
C7orf50	ENSG00000146540.10	5	0.90858	8.31577	8.78691	9.10026	7.4829	10.5407	10.018	16.1097	16.177	19.8627
C7orf55-LUC7L2	ENSG00000146963.13	1	0.781733	9.66447	7.01677	8.45114	12.7421	10.5911	11.9981	11.6484	9.52687	10.3131
C7orf63	ENSG00000105792.15	2	0.980095	0.753905	0.868098	0.672794	0.814364	0.792596	0.164959	0.453327	0.187549	0.0424345
C7orf73	ENSG00000243317.3	3	0.904556	13.5707	11.8545	14.3832	16.1269	15.0086	17.8474	19.7227	16.5406	21.1608
C8orf33	ENSG00000182307.8	1	0.896284	12.9933	12.1218	12.9409	35.278	48.5557	64.8309	49.272	41.517	52.7369
C8orf34	ENSG00000165084.11	2	0.986556	0.810181	0.780024	0.810273	1.02488	1.09632	0.229746	0.509315	0.152371	0.0503696
C8orf37	ENSG00000156172.5	5	0.84044	2.72991	1.91902	2.70319	2.33987	2.67858	2.56235	3.00545	3.71295	4.8114
C8orf44	ENSG00000213865.3	4	0.947256	6.3711	6.32156	7.21478	5.07287	2.9254	1.92199	1.99605	1.12295	1.4046
C8orf59	ENSG00000176731.7	3	0.928924	16.3474	14.2178	15.4822	20.0216	21.048	25.4066	25.7773	21.6264	32.1206
C9	ENSG00000113600.6	2	0.961737	1.2971	1.79229	1.22732	1.30659	1.54674	0.306519	0.734607	0.283959	0.0597346
C9orf114	ENSG00000198917.7	3	0.97401	16.4084	18.2204	19.2553	26.4925	41.5442	48.7313	43.8946	49.0358	56.0187
C9orf142	ENSG00000148362.6	5	0.86224	48.784	25.7731	27.0492	36.4708	37.2371	43.4514	62.1292	68.2652	74.4309
C9orf16	ENSG00000171159.4	5	0.891721	34.444	32.3879	32.992	43.0537	36.2397	41.6651	53.2174	60.984	60.7105
C9orf40	ENSG00000135045.6	5	0.93836	5.30032	6.56208	6.18953	5.20207	7.12111	6.52176	11.5932	17.3177	17.9231
C9orf41	ENSG00000156017.8	3	0.990943	10.7941	9.21538	10.1951	13.6156	16.5951	19.9591	20.1891	20.4988	24.067
C9orf64	ENSG00000165118.10	5	0.958491	3.98967	3.87617	4.01234	5.38864	5.23584	4.14318	13.5219	16.7766	14.4303
C9orf69	ENSG00000238227.3	1	0.906128	19.9587	24.434	22.819	31.9532	47.5811	55.3832	42.7194	38.6798	44.0228
C9orf72	ENSG00000147894.10	4	0.959115	12.9114	10.8657	10.5754	8.16646	3.81451	2.61168	4.7848	5.37937	6.50895
C9orf84	ENSG00000165181.12	2	0.980869	0.772779	0.733496	0.669563	0.712808	0.820985	0.138593	0.398583	0.129765	0.0400369
C9orf89	ENSG00000165233.13	4	0.936059	18.9668	17.8034	19.3553	8.87661	5.60383	3.4741	8.56841	10.8173	10.5274
C9orf91	ENSG00000157693.10	1	0.985354	15.2478	14.2238	17.1023	29.9393	36.7958	40.4261	23.5642	23.6865	23.5355
C9orf96	ENSG00000198870.6	2	0.989197	1.9269	2.05615	2.01489	2.29127	2.24779	0.500882	1.0651	0.828326	0.210842
CA11	ENSG00000063180.4	5	0.808898	9.38745	11.7169	13.8419	8.34023	7.36428	5.49746	11.3296	15.6762	15.2405
CA5B	ENSG00000169239.8	4	0.864036	6.08128	9.35234	9.84388	3.79076	3.93827	3.3718	1.91201	2.16175	2.46583
CAAP1	ENSG00000120159.7	3	0.97851	8.43836	7.47215	7.57328	11.5432	14.2552	16.3228	15.2322	15.4682	17.5341
CAB39	ENSG00000135932.6	3	0.940871	28.0733	26.6266	26.4942	29.8281	43.8003	42.0955	59.8399	59.9265	71.8197
CABLES2	ENSG00000149679.7	5	0.988466	8.8769	8.36166	10.3922	8.86022	7.31418	7.56769	15.0313	16.3024	16.4773
CABP4	ENSG00000175544.9	2	0.9682	2.36193	3.15835	2.30763	3.15383	2.57159	0.52094	1.33767	0.860215	0.14358
CACNA1B	ENSG00000148408.8	2	0.976036	2.31901	2.67709	2.33761	2.98982	3.71722	0.84271	1.61099	0.877803	0.183244
CACNA1C	ENSG00000151067.16	2	0.98144	1.54492	2.06988	1.64931	2.34747	2.32314	0.566874	1.18598	0.597213	0.142572
CACNA1C-AS1	ENSG00000246627.2	4	0.977727	4.996	4.6872	4.97901	3.39781	2.1432	1.14253	1.7707	1.25569	1.24242
CACNA1C-AS2	ENSG00000256271.1	4	0.935032	5.30758	4.9027	6.77699	3.97544	3.25867	0.330063	1.66117	1.12579	0.98414
CACNA1D	ENSG00000157388.9	2	0.980887	1.6075	1.71861	1.72691	2.366	2.37054	0.470358	1.12941	0.522886	0.106854
CACNA1E	ENSG00000198216.6	2	0.980437	1.22753	1.51737	1.45108	1.80059	1.94812	0.407571	0.978136	0.498538	0.0847959
CACNA1F	ENSG00000102001.8	2	0.91075	1.90307	2.75819	2.52879	1.74729	2.92179	0.689081	0.827467	0.929139	0.274796
CACNA1G	ENSG00000006283.13	2	0.965463	1.83982	2.27567	1.78711	3.06621	2.92293	0.491704	1.17098	0.765001	0.116199
CACNA1I	ENSG00000100346.13	4	0.92985	17.6802	28.0792	25.8453	8.28165	4.51819	1.1163	1.52306	0.839093	0.211227
CACNA2D1	ENSG00000153956.11	2	0.98973	0.78358	0.861591	0.832	0.885736	1.09028	0.245404	0.497244	0.207144	0.0626067
CACNA2D3-AS1	ENSG00000243715.1	2	0.927936	0.818681	1.60105	1.05387	1.33769	1.14602	0.290195	0.394108	0.366595	0.050898
CACNB1	ENSG00000067191.11	5	0.84386	4.23266	4.14871	4.76114	4.75265	4.86761	2.80516	5.99627	5.65378	5.81957
CACNG8	ENSG00000142408.2	2	0.942872	1.79905	2.34065	1.73329	2.01951	3.19902	0.540037	1.23918	0.657536	0.0967336
CACTIN	ENSG00000105298.9	1	0.927727	8.67473	9.86076	9.43889	13.393	15.0707	18.2029	14.6254	12.498	15.4894
CACTIN-AS1	ENSG00000226800.5	2	0.961021	2.75681	4.23636	3.25818	3.09363	3.89022	0.8406	1.15839	0.736696	0.129006
CACUL1	ENSG00000151893.10	1	0.889186	15.5713	12.7394	13.9018	19.2097	20.1546	23.7715	20.2345	16.3636	22.0414
CACYBP	ENSG00000116161.13	3	0.959937	14.0511	8.81443	10.2531	21.6715	21.9794	34.3631	45.3112	48.9585	57.9017
CAD	ENSG00000084774.9	3	0.966503	14.059	15.7102	18.5218	50.0937	73.9898	80.5812	129.329	150.711	159.746
CADPS	ENSG00000163618.13	2	0.99112	0.924955	1.05598	0.956224	1.12837	1.24186	0.28525	0.655629	0.286542	0.0458112
CALCOCO1	ENSG00000012822.11	4	0.976307	38.6395	40.6482	46.1543	22.3459	7.21819	3.44007	3.3131	2.311	1.47831
CALD1	ENSG00000122786.15	2	0.922731	1.34487	1.35735	1.37412	1.95049	1.96854	1.1184	0.950864	0.533172	0.408295
CALHM2	ENSG00000138172.6	4	0.901089	9.61048	8.67209	7.65501	3.666	1.83651	0.596917	2.86116	5.61868	3.7398
CALM2	ENSG00000143933.12	1	0.908652	22.1795	16.1748	19.5135	32.1591	42.6615	50.1822	37.7956	37.5178	42.9651
CALM3	ENSG00000160014.12	5	0.964932	98.5148	91.1694	109.38	100.452	87.4827	89.7193	236.298	215.988	240.086
CALML4	ENSG00000129007.10	1	0.967729	2.08957	2.19784	2.54014	4.97859	6.4407	7.32655	5.16664	4.93707	5.52031
CALR	ENSG00000179218.9	3	0.986988	118.408	88.073	110.111	320.216	408.642	511.261	728.572	612.136	737.323
CALU	ENSG00000128595.12	3	0.944522	11.9801	11.2439	12.7911	27.6693	36.5675	48.9119	38.193	40.3391	45.3727
CALY	ENSG00000130643.4	2	0.894062	3.06119	2.71775	2.48461	3.49151	1.81476	0.711534	1.30737	0.741559	0.187197
CAMK1	ENSG00000134072.6	5	0.857522	1.8138	2.94811	1.57928	2.43951	3.68451	0.794427	6.07487	8.6821	5.04204
CAMK2D	ENSG00000145349.12	1	0.971017	15.18	15.5019	16.1067	42.7091	50.8328	70.2902	43.2211	34.794	45.5404
CAMK2G	ENSG00000148660.16	4	0.803041	15.806	18.3719	20.7896	9.88073	7.4603	4.03798	11.5916	13.8348	14.2011
CAMK4	ENSG00000152495.6	4	0.961226	109.136	72.8391	85.8511	50.797	19.8025	18.2042	17.7596	11.832	14.4139
CAMKK1	ENSG00000004660.10	1	0.863392	2.56649	2.8382	2.82501	5.19361	8.08621	5.88892	6.37214	5.4743	5.46116
CAMKK2	ENSG00000110931.14	1	0.983534	8.07882	8.34846	8.74136	29.678	52.3202	54.4156	27.5498	26.989	28.2277
CAMKMT	ENSG00000143919.10	5	0.847697	5.52012	4.59559	6.16253	4.78561	4.35095	5.33874	6.18016	6.6711	7.47333
CAMKV	ENSG00000164076.12	1	0.369368	1.13415	1.94675	1.59818	2.41415	3.18033	1.34006	2.34693	2.58811	1.80797
CAMSAP1	ENSG00000130559.14	3	0.939454	10.0297	9.82186	10.7405	13.2811	17.774	16.7178	16.5727	16.691	17.6807
CAMTA2	ENSG00000108509.16	5	0.901618	34.678	26.364	25.092	31.3362	25.7639	33.025	44.1113	50.3104	61.5327
CAND1	ENSG00000111530.8	3	0.970554	21.3042	16.7178	21.5336	29.4385	34.197	38.5383	46.9885	53.6429	60.932
CANT1	ENSG00000171302.12	3	0.885859	17.3051	16.1762	20.8567	24.804	28.9317	35.7025	29.4129	28.0621	31.8369
CANX	ENSG00000127022.10	3	0.955848	63.6422	56.4244	64.5053	153.047	210.962	260.296	236.574	221.29	246.872
CAP1	ENSG00000131236.12	5	0.944552	59.0788	55.0224	61.0622	66.5812	66.706	78.6458	155.611	171.441	181.204
CAPN1	ENSG00000014216.11	5	0.888911	15.0571	16.761	19.0693	10.0199	6.50299	4.00527	22.6295	25.5323	24.7576
CAPN15	ENSG00000103326.6	1	0.978655	11.2607	11.3927	12.1542	44.8109	64.7671	79.095	45.266	42.9441	50.3713
CAPN2	ENSG00000162909.13	4	0.956488	13.9801	12.0994	13.9199	10.821	5.50756	4.81259	4.39987	4.03766	3.53276
CAPN5	ENSG00000149260.10	4	0.866729	2.59349	3.88765	4.12536	2.45766	2.34951	0.529742	1.38287	0.926594	0.628948
CAPN8	ENSG00000203697.7	2	0.95911	1.59161	1.8266	1.49479	2.30052	2.77543	0.504072	1.14301	0.543711	0.0748089
CAPN9	ENSG00000135773.8	2	0.967905	1.54179	2.50032	1.98146	2.31692	2.9083	0.562018	1.22618	0.455366	0.0951746
CAPNS1	ENSG00000126247.6	5	0.963632	42.0413	43.2176	49.1614	40.5029	47.2453	48.7061	103.329	120.411	132.638
CAPRIN1	ENSG00000135387.15	3	0.964398	45.888	39.253	43.9928	104.269	168.552	210.603	178.097	183.005	215.242
CAPRIN2	ENSG00000110888.13	4	0.983424	10.3477	7.68375	9.31952	6.63932	2.91982	1.85139	3.18086	3.11639	3.3189
CAPS	ENSG00000105519.8	4	0.962321	18.5195	13.8882	13.178	7.85719	2.68834	1.04258	1.57562	0.948279	0.653993
CAPS2	ENSG00000180881.15	2	0.893383	2.12618	1.42156	1.92992	1.93963	1.39912	0.378441	0.648391	0.451626	0.254205
CAPZA1	ENSG00000116489.8	3	0.990646	60.7372	48.0652	54.5547	105.908	125.366	151.791	181.089	192.106	230.312
CAPZA2	ENSG00000198898.8	3	0.966853	6.87709	5.95094	6.12679	9.64474	14.0924	14.3158	13.2987	15.411	16.1142
CAPZB	ENSG00000077549.13	5	0.935582	84.7673	84.2763	95.1567	93.9247	94.1167	109.092	168.318	196.286	229.2
CARD11	ENSG00000198286.5	5	0.969123	28.4801	30.6467	31.7802	22.6123	17.6023	17.5728	52.0118	52.056	55.1413
CARD16	ENSG00000204397.3	4	0.930584	10.4311	8.28812	12.3748	9.40242	4.46754	2.76863	2.76829	2.84315	3.07023
CARD17	ENSG00000255221.2	2	0.874559	4.92842	3.47818	3.4342	2.6939	3.40692	0.647023	1.75742	0.572155	0.226966
CARD6	ENSG00000132357.9	4	0.607213	3.38541	2.63856	3.63961	2.91621	2.16642	1.24573	2.30078	2.88463	3.63218
CARD8	ENSG00000105483.12	4	0.954663	30.8671	23.8045	27.8409	19.8683	8.44202	8.19218	14.2534	14.4156	16.359
CARF	ENSG00000138380.13	4	0.978162	8.73246	7.00997	7.93421	4.64266	2.58535	1.61147	1.63065	1.56072	1.39357
CARHSP1	ENSG00000153048.6	4	0.943972	10.3086	9.79992	9.15955	4.98067	2.91685	0.951573	3.99639	5.81813	3.94199
CARM1	ENSG00000142453.7	3	0.960036	12.1808	12.4415	14.146	33.4586	43.1285	55.8303	75.7332	93.356	112.763
CARNS1	ENSG00000172508.6	4	0.954132	5.82075	5.79245	5.67464	3.79548	3.01004	0.983772	1.84369	1.47789	0.945118
CARS	ENSG00000110619.12	1	0.967391	7.42387	6.51893	8.21556	25.7471	31.3883	33.9604	12.9014	17.5475	18.3249
CARS2	ENSG00000134905.12	3	0.908676	9.2949	8.20448	9.6307	11.2385	10.4728	10.6558	11.3895	11.3612	12.3562
CASC1	ENSG00000118307.14	2	0.981304	1.84414	1.58939	1.79756	1.91365	2.25209	0.374508	0.848591	0.464502	0.191086
CASC15	ENSG00000272168.1	2	0.891116	2.51502	2.20127	1.85648	1.88801	1.45804	0.342188	0.794194	0.399286	0.0852876
CASC3	ENSG00000108349.10	3	0.880956	31.6779	27.932	32.556	42.4308	41.6813	54.151	46.6864	40.6563	55.099
CASC5	ENSG00000137812.15	5	0.983769	0.796668	0.923812	0.887479	1.11976	1.13263	0.338283	4.1312	5.43282	5.72685
CASC7	ENSG00000259758.1	1	0.9679	31.1356	24.0605	29.5241	119.929	173.216	217.757	78.5957	56.3554	79.0058
CASP2	ENSG00000106144.15	5	0.972862	22.9304	24.5391	28.1986	19.007	14.7602	15.0318	40.263	44.5957	52.9314
CASP3	ENSG00000164305.13	5	0.976615	20.451	12.5356	16.2413	17.8161	14.4784	13.9194	37.5221	40.2308	40.7158
CASP7	ENSG00000165806.15	3	0.701694	3.92664	4.50409	4.64155	8.09757	6.9281	5.74144	8.03361	6.07713	7.06938
CASP8AP2	ENSG00000118412.8	5	0.806103	16.9427	12.5851	12.6113	9.72409	5.7286	4.78617	15.602	17.6957	18.4145
CASS4	ENSG00000087589.12	4	0.984612	10.2284	10.2792	10.233	6.61652	2.9583	1.57311	3.00414	4.5707	3.83649
CASZ1	ENSG00000130940.10	1	0.673361	2.93391	3.23589	2.66743	6.10656	6.76624	4.31328	4.34313	2.67794	2.49114
CAT	ENSG00000121691.4	4	0.812956	17.9678	17.7903	21.0382	10.4484	4.59519	3.51329	11.9319	14.2137	14.3044
CATSPERB	ENSG00000133962.3	4	0.850548	4.37758	2.13457	4.81305	3.3735	1.98981	1.14149	1.14557	0.55427	0.563085
CATSPERD	ENSG00000174898.11	2	0.956637	1.98586	1.96394	1.39288	2.84938	2.44527	0.456245	1.09344	0.494023	0.102885
CBFA2T2	ENSG00000078699.17	4	0.995369	17.3414	15.2176	18.0445	11.6435	5.95967	4.68141	6.68332	6.00115	6.37855
CBFB	ENSG00000067955.9	3	0.923536	32.6524	22.5406	23.9283	37.9825	45.612	47.6598	51.6857	44.7403	47.9948
CBLB	ENSG00000114423.14	1	0.771855	18.5975	18.5881	17.2159	35.5042	50.087	50.1818	11.1472	15.2445	13.0684
CBLL1	ENSG00000105879.7	1	0.962073	36.0357	32.8092	38.7257	47.1	55.6508	61.1442	42.373	44.1073	49.7473
CBLN3	ENSG00000139899.6	5	0.468332	2.65608	2.99673	4.01087	7.59486	3.9892	2.80486	5.00166	5.41158	5.6282
CBR1	ENSG00000159228.8	3	0.989446	12.1863	12.5349	16.055	27.1933	36.005	47.4011	46.0896	53.1072	58.3656
CBR3	ENSG00000159231.5	4	0.592103	9.60483	6.71364	7.34926	9.58814	3.73478	1.6765	6.38747	8.73217	5.94124
CBR3-AS1	ENSG00000236830.2	2	0.947025	2.40464	2.01408	2.01478	2.36776	1.84951	0.4215	1.15234	0.526551	0.262855
CBR4	ENSG00000145439.7	5	0.59859	7.6405	5.82625	7.69758	4.73786	3.20399	2.81255	5.39246	7.37186	7.81
CBS	ENSG00000160200.13	5	0.620294	1.97932	2.57182	2.26811	2.84765	3.64493	1.37526	2.18556	5.81957	3.53947
CBWD1	ENSG00000172785.14	1	0.937949	0.936915	0.754444	1.21216	1.94649	2.4651	2.86451	1.30524	1.02588	1.68085
CBWD2	ENSG00000136682.10	1	0.89451	1.34124	1.05761	1.33824	2.65508	2.24537	3.29046	1.79173	1.43958	1.57011
CBX1	ENSG00000108468.10	5	0.961696	18.7095	17.382	16.5073	17.1668	19.2539	19.6971	41.682	49.5271	51.4726
CBX2	ENSG00000173894.6	5	0.946884	1.24144	1.48503	1.56993	1.9236	2.28568	0.618542	3.54083	4.58785	4.14733
CBX3	ENSG00000122565.14	5	0.898051	35.3367	23.5095	28.1306	30.9907	36.1543	41.6981	62.0624	68.8905	77.887
CBX4	ENSG00000141582.10	4	0.986518	21.7673	23.0744	21.8175	12.1737	6.09829	3.36759	7.56062	7.35333	7.2959
CBX5	ENSG00000094916.9	5	0.939123	30.7724	29.6474	32.3634	26.2166	23.5611	19.9032	45.8476	48.994	41.0195
CBX6	ENSG00000183741.7	3	0.957651	26.9059	23.4461	27.6705	69.2221	97.1505	116.137	103.985	95.7305	116.966
CBX7	ENSG00000100307.8	4	0.977254	39.0361	36.4278	35.1544	21.2964	10.0942	6.59387	7.00558	6.78469	5.78375
CC2D1A	ENSG00000132024.13	5	0.993698	8.54154	8.3631	9.66144	8.25682	7.48284	6.59191	15.7935	18.1111	19.996
CC2D2A	ENSG00000048342.11	2	0.945777	1.23602	1.2396	1.53547	1.42143	1.20592	0.292086	0.78911	0.47297	0.037258
CCAR1	ENSG00000060339.9	3	0.910212	36.7624	31.3541	36.164	43.6838	39.4624	45.8733	57.669	61.722	71.7854
CCAR2	ENSG00000158941.12	3	0.980629	25.9453	21.96	22.662	35.7493	35.3838	43.2919	51.0861	45.4925	52.759
CCDC106	ENSG00000173581.3	5	0.852448	3.54813	2.92859	3.63777	4.79952	3.62622	2.28166	7.4866	6.1162	5.68719
CCDC108	ENSG00000181378.9	2	0.974026	1.21296	1.63818	1.39326	1.70488	2.06584	0.343964	0.897621	0.546769	0.0703834
CCDC109B	ENSG00000005059.11	4	0.91562	52.5714	44.188	53.4772	30.8219	11.6015	11.3837	29.2591	27.2555	33.0061
CCDC112	ENSG00000164221.8	4	0.94452	4.60348	2.85308	3.84136	1.82663	1.47829	1.02368	1.6844	1.48234	1.24342
CCDC113	ENSG00000103021.5	5	0.395632	1.32033	1.26658	1.15109	1.40698	1.94201	0.551103	1.74749	1.70942	1.26698
CCDC114	ENSG00000105479.11	2	0.967399	2.61178	2.91699	2.93888	4.10902	3.13905	0.748113	1.77052	0.912581	0.344435
CCDC117	ENSG00000159873.5	3	0.978516	12.2078	12.8553	12.7902	20.1961	19.2711	24.4165	29.25	26.8035	33.0764
CCDC12	ENSG00000160799.7	1	0.970602	6.6739	6.28049	7.15781	12.5241	13.4208	14.6718	12.0283	10.5278	12.0583
CCDC124	ENSG00000007080.6	3	0.957962	7.48126	8.47931	9.23467	19.3381	27.1976	36.5993	53.1944	58.1204	75.4805
CCDC134	ENSG00000100147.9	5	0.815483	17.9499	18.7407	23.0136	13.9798	11.7978	7.51803	21.4696	25.9726	23.9015
CCDC136	ENSG00000128596.12	4	0.49617	3.47777	3.54297	4.13791	3.75309	3.20706	0.690276	3.46435	4.08714	3.4811
CCDC137	ENSG00000185298.8	3	0.984774	8.93109	10.285	8.23376	17.7584	23.3876	26.0176	35.9473	33.4694	41.1781
CCDC138	ENSG00000163006.7	5	0.884988	3.08192	2.61985	2.81924	3.34168	3.38972	3.68481	8.22846	6.65049	7.21409
CCDC14	ENSG00000175455.10	5	0.847185	8.6569	5.65708	6.94963	6.18323	3.01096	2.84414	8.27809	9.50931	10.3374
CCDC141	ENSG00000163492.9	4	0.975895	4.23487	3.50705	4.52061	2.88522	1.77947	1.1452	1.34423	1.11708	1.18233
CCDC146	ENSG00000135205.10	4	0.891904	4.69486	3.67488	5.97176	4.06394	2.6493	1.29661	1.44835	0.623853	0.791011
CCDC149	ENSG00000181982.13	2	0.980696	1.30467	1.37075	1.33584	1.81507	1.95678	0.388007	0.894715	0.405373	0.121393
CCDC15	ENSG00000149548.10	5	0.895352	2.32802	2.28169	2.37509	1.822	1.64589	0.635575	2.69686	3.91711	3.30405
CCDC150	ENSG00000144395.13	5	0.516562	1.09762	1.26811	0.982533	1.32369	1.39308	0.249004	1.4571	1.32115	1.32112
CCDC152	ENSG00000198865.5	5	0.911886	3.49565	4.3014	3.73148	3.44979	2.9499	1.93334	4.7177	6.62759	5.44604
CCDC158	ENSG00000163749.13	2	0.980185	0.944153	0.976019	1.02121	1.1331	0.948887	0.26602	0.52649	0.292694	0.0541835
CCDC167	ENSG00000198937.8	5	0.959901	29.8194	22.8772	17.5532	28.1028	22.7628	23.3806	119.384	125.897	117.1
CCDC18	ENSG00000122483.13	5	0.911519	3.41271	2.8471	3.51387	3.8045	3.25881	3.47028	4.24183	4.72649	4.88806
CCDC180	ENSG00000197816.9	2	0.943136	0.820438	0.658249	0.812408	0.831399	0.648337	0.162608	0.332751	0.180136	0.0680097
CCDC22	ENSG00000101997.8	3	0.920744	12.7118	16.6138	17.475	19.3877	20.2318	21.6707	27.5143	24.8428	25.6288
CCDC25	ENSG00000147419.12	5	0.947465	10.2853	9.4635	10.7196	10.9237	10.0397	10.8416	14.8849	18.1287	20.443
CCDC28A	ENSG00000024862.12	4	0.990888	17.7968	15.5674	18.6924	9.71007	3.44905	1.478	5.98953	6.5434	6.29224
CCDC28B	ENSG00000160050.10	5	0.876064	3.10904	4.54083	4.87197	4.58206	5.24654	3.47735	5.84651	8.21797	7.14365
CCDC30	ENSG00000186409.10	2	0.969807	1.5581	1.22866	1.46819	1.68886	1.53175	0.389724	0.793469	0.419181	0.247379
CCDC34	ENSG00000109881.12	5	0.93361	1.41275	1.82817	2.16606	1.77751	1.06324	0.323078	2.6455	3.34671	3.22993
CCDC39	ENSG00000145075.7	2	0.986749	1.11646	1.031	0.996072	1.10702	1.31528	0.280811	0.619781	0.232644	0.0366528
CCDC41	ENSG00000173588.10	1	0.974468	3.07257	2.36656	3.00598	11.2847	15.2689	17.2227	8.05334	5.6245	6.2554
CCDC43	ENSG00000180329.9	3	0.982883	6.5844	5.82657	5.8119	11.4951	14.91	16.739	18.0547	15.9561	18.8687
CCDC47	ENSG00000108588.9	3	0.919103	12.1489	9.79611	11.6587	31.8395	41.9914	49.7094	43.6294	36.2674	45.5903
CCDC50	ENSG00000152492.9	5	0.590023	1.06303	1.08465	1.61097	1.29601	1.28319	1.0922	1.57578	1.09276	3.35236
CCDC51	ENSG00000164051.9	5	0.964029	2.75301	2.90256	2.79596	3.49744	4.03493	3.29454	12.1134	14.7141	14.541
CCDC53	ENSG00000120860.6	4	0.775185	21.093	17.0088	22.7706	15.6997	7.30901	6.20157	16.7763	16.2463	16.3972
CCDC58	ENSG00000160124.5	3	0.981301	9.11019	6.74248	9.59991	29.3759	41.7706	49.9643	43.8421	49.324	58.7993
CCDC59	ENSG00000133773.7	1	0.913944	13.0604	10.731	10.3059	23.4597	30.0249	34.2628	26.9769	25.7384	30.1124
CCDC6	ENSG00000108091.10	3	0.969946	14.9045	12.8919	15.0797	19.7282	26.7351	30.3634	32.3149	37.7729	46.3528
CCDC64	ENSG00000135127.7	1	0.888132	30.6489	29.5807	26.8167	102.259	116.244	138.678	30.1627	35.0058	45.7959
CCDC65	ENSG00000139537.6	4	0.955586	6.70307	6.90221	6.60197	2.6073	2.42526	0.571769	0.933838	0.59389	0.193139
CCDC69	ENSG00000198624.8	4	0.882582	41.1761	35.2128	38.5463	24.4779	6.95559	4.11639	27.0924	21.8557	22.1714
CCDC71	ENSG00000177352.9	5	0.81363	29.8501	27.2063	34.6183	31.2656	30.1412	34.141	34.1085	41.2116	44.6977
CCDC77	ENSG00000120647.5	5	0.966592	5.78998	5.1458	5.84984	5.28482	4.14588	2.78097	7.46469	8.60011	9.16015
CCDC85B	ENSG00000175602.2	3	0.938347	13.0597	15.4537	14.3003	23.1637	35.5474	43.0266	65.158	78.9322	91.2745
CCDC85C	ENSG00000205476.4	1	0.866898	4.91944	4.7728	4.87129	7.86342	13.0212	13.9945	5.79934	5.91421	4.38822
CCDC86	ENSG00000110104.7	3	0.989118	5.53479	6.30203	9.97224	85.6324	128.208	181.316	199.931	169.277	221.312
CCDC88B	ENSG00000168071.17	5	0.610348	11.415	10.977	13.4769	15.7358	10.9219	10.2483	16.2719	12.3352	16.1994
CCDC94	ENSG00000105248.11	3	0.96364	15.6785	16.7449	16.3315	28.4406	37.6479	37.2305	40.1305	35.9465	41.2895
CCER1	ENSG00000197651.3	2	0.970535	1.39014	1.23633	1.19473	1.27189	1.49926	0.154956	0.772446	0.234901	0.0869698
CCHCR1	ENSG00000204536.9	5	0.553079	4.78321	5.14928	7.10459	5.51832	4.03851	1.95634	5.19058	5.57933	6.63378
CCK	ENSG00000187094.7	2	0.935103	1.50947	1.14561	1.77748	2.32234	2.33194	0.650747	0.901094	0.274023	0.0676362
CCL2	ENSG00000108691.5	2	0.652574	1.64586	3.75141	1.77791	10.1734	9.16339	4.28712	3.3048	0.468996	0.279066
CCL20	ENSG00000115009.7	1	0.88157	0.254864	0.766805	0.441647	5.03755	16.1289	19.5362	1.98469	1.11272	3.01057
CCL22	ENSG00000102962.4	5	0.65047	2.00383	2.33	1.12151	2.66342	6.0979	1.40685	9.32557	8.68678	3.88784
CCL28	ENSG00000151882.7	4	0.85576	7.28778	6.20146	6.34173	4.48148	1.67453	1.10898	4.15867	4.61487	4.69105
CCL3	ENSG00000006075.11	3	0.824058	0.626285	1.71299	1.0148	11.5837	19.925	9.04807	36.7592	22.7158	20.0111
CCL4	ENSG00000129277.9	3	0.775469	1.59071	1.3854	1.40933	8.78149	16.7493	7.74061	13.3711	11.6779	9.68135
CCM2	ENSG00000136280.11	4	0.991837	35.8779	29.7575	37.7876	16.6514	5.48433	4.82533	9.3691	9.19234	8.76653
CCNA2	ENSG00000145386.5	5	0.920317	2.28086	2.28746	2.04774	1.95558	1.88023	1.09595	14.7949	42.8963	29.8606
CCNB1	ENSG00000134057.10	3	0.889499	2.39421	3.30156	2.30492	4.97768	5.31432	6.30607	14.9531	11.9717	12.5695
CCNB1IP1	ENSG00000100814.13	3	0.967065	9.61558	8.39161	8.30839	13.3528	17.095	16.4548	21.207	25.0685	24.7458
CCNB2	ENSG00000157456.3	5	0.966222	1.49148	1.0751	1.29227	1.86707	1.90297	0.440567	3.88031	5.59337	4.77155
CCNC	ENSG00000112237.8	3	0.902691	8.26264	6.74761	7.86034	12.8164	15.2325	18.2703	14.4898	13.7557	17.5207
CCND1	ENSG00000110092.3	1	0.899421	1.70826	1.58957	1.58691	18.3792	42.5051	53.0196	5.76491	6.45072	7.37954
CCND2	ENSG00000118971.3	3	0.988488	49.5842	45.0672	60.6086	284.942	568.559	703.586	870.448	746.728	923.659
CCND3	ENSG00000112576.8	5	0.949732	34.0404	33.5916	39.9687	25.5978	42.8733	54.5567	157.029	228.55	261.528
CCNDBP1	ENSG00000166946.9	4	0.97854	28.1778	23.6072	27.0734	14.689	6.9815	5.68507	10.5805	11.8112	12.9003
CCNE1	ENSG00000105173.9	5	0.976944	4.20667	4.78357	5.14947	4.71387	3.47756	2.32866	14.6698	23.2273	19.0692
CCNE2	ENSG00000175305.12	5	0.869486	1.2762	1.08597	0.919063	1.28418	1.10527	0.319859	3.19772	6.6931	3.15768
CCNF	ENSG00000162063.8	5	0.906912	2.06282	2.7043	2.68345	3.11259	3.20846	2.01518	4.80288	6.21236	4.66048
CCNG2	ENSG00000138764.9	4	0.973683	7.94707	6.31439	8.36533	4.69285	1.71332	0.786976	1.01235	0.438451	0.212353
CCNI2	ENSG00000205089.3	1	0.986861	5.55821	4.29016	5.18683	17.3324	18.7047	23.9484	15.3273	12.2881	14.2083
CCNJ	ENSG00000107443.11	1	0.96338	6.06992	5.28542	6.49785	10.506	13.1329	16.9001	11.1608	7.44704	9.83377
CCNK	ENSG00000090061.13	3	0.987401	20.1063	17.1652	19.9709	26.4532	29.5024	35.6228	35.9487	35.3692	43.7304
CCNT1	ENSG00000129315.5	1	0.978817	26.1095	23.7897	25.7612	41.6189	48.8552	54.3193	32.0209	32.7258	36.4103
CCNYL1	ENSG00000163249.5	1	0.840051	5.13221	4.60335	4.93882	8.78205	11.9738	11.4447	5.52664	3.89227	4.58387
CCP110	ENSG00000103540.12	3	0.91444	5.58604	4.63194	5.61467	6.33203	6.13357	6.45609	6.86088	7.73387	8.53228
CCPG1	ENSG00000260916.1	4	0.931901	2.09023	2.08658	1.90688	1.47917	1.07241	0.394471	0.635742	0.441991	0.248673
CCR1	ENSG00000163823.3	2	0.8269	3.42611	2.09285	1.51124	2.95502	3.488	1.93207	1.27005	0.32078	0.284005
CCR4	ENSG00000183813.6	1	0.964878	1.86887	2.70116	2.667	71.0103	168.028	154.069	82.8528	75.9322	89.6705
CCR9	ENSG00000173585.11	4	0.839045	1.81819	3.3126	2.85062	1.53334	1.59073	0.393853	0.686482	0.379942	0.062799
CCRN4L	ENSG00000151014.4	1	0.943478	2.21187	2.21827	2.71397	21.3906	38.1985	41.3323	31.3171	24.9119	27.7619
CCT2	ENSG00000166226.8	3	0.93921	23.007	22.9749	25.4517	132.635	232.477	279.921	216.27	235.039	258.697
CCT3	ENSG00000163468.10	3	0.993577	39.7149	37.1122	37.4395	145.482	216.653	273.398	341.593	365.573	417.142
CCT4	ENSG00000115484.10	3	0.997546	44.424	35.0573	38.6022	119.801	162.023	204.933	239.627	237.243	270.096
CCT5	ENSG00000150753.7	3	0.996972	16.68	15.2235	17.4833	90.1751	136.375	181.386	195.072	198.117	242.652
CCT6A	ENSG00000146731.6	3	0.983644	17.7928	16.5103	17.8346	60.8209	88.3143	119.054	166.096	171.104	201.329
CCT7	ENSG00000135624.11	3	0.997364	29.9433	28.4357	29.5328	109.853	165.848	198.471	235.615	242.443	274.579
CCT8	ENSG00000156261.8	3	0.992586	35.1045	27.7714	30.3464	103.096	148.171	199.789	194.427	220.128	266.342
CCZ1	ENSG00000122674.8	3	0.558642	3.4867	3.8756	3.46696	3.13954	6.3044	5.06383	3.17594	7.31208	5.50959
CCZ1B	ENSG00000146574.11	3	0.614126	3.98796	2.32041	2.97033	5.14772	3.18729	5.22029	5.80115	3.01965	5.70563
CD109	ENSG00000156535.9	1	0.805556	1.93907	1.88223	1.33878	6.31982	12.773	8.58117	11.7374	6.05412	4.43503
CD151	ENSG00000177697.13	3	0.680755	2.2896	5.43729	3.29385	4.44015	9.92768	5.74237	9.22374	18.0677	8.69298
CD163	ENSG00000177575.8	2	0.996986	1.72668	1.80505	1.76774	2.14414	2.27028	0.510042	0.994472	0.471774	0.115233
CD163L1	ENSG00000177675.4	2	0.977141	1.89855	2.1739	1.67272	2.00138	2.52862	0.556394	1.2615	0.649324	0.130116
CD164	ENSG00000135535.10	3	0.881451	51.6686	43.5872	44.9768	60.2782	69.3328	84.388	66.2113	71.0552	76.4713
CD180	ENSG00000134061.4	4	0.826811	2.23547	1.13516	0.980702	0.984383	0.660189	0.150455	0.480777	0.24075	0.0469133
CD2	ENSG00000116824.4	1	0.890861	187.448	149.783	158.273	319.473	575.324	631.578	459.388	475.219	523.413
CD200	ENSG00000091972.14	1	0.984989	4.12365	3.87889	4.02696	296.496	490.327	617.458	193.485	166.148	225.052
CD200R1	ENSG00000163606.6	4	0.967013	13.8101	9.41545	15.3574	7.09539	2.15986	1.35121	0.962244	0.37065	0.613922
CD226	ENSG00000150637.4	1	0.785112	13.6072	21.1058	15.6877	20.1227	30.3422	42.2133	36.1335	19.4248	29.0543
CD247	ENSG00000198821.6	4	0.994852	167.107	153.506	184.45	96.9814	45.0873	37.795	55.148	58.5123	54.9893
CD248	ENSG00000174807.3	4	0.914471	3.9571	5.90279	5.4001	3.08476	2.21107	0.510772	2.14692	2.05485	0.771814
CD27	ENSG00000139193.3	5	0.918817	224.416	246.12	268.814	238.48	183.463	205.463	448.666	376.192	394.835
CD274	ENSG00000120217.9	1	0.913421	4.51394	3.3018	4.7158	19.0556	60.0721	66.277	18.4932	12.6562	14.4609
CD2AP	ENSG00000198087.7	3	0.983783	12.0328	10.3743	12.2518	16.802	20.0187	20.8497	23.0986	21.2139	23.3017
CD2BP2	ENSG00000169217.4	3	0.968433	18.5993	18.6984	20.1809	24.4075	22.6698	26.7843	28.5877	27.1157	30.4525
CD300E	ENSG00000186407.4	2	0.985264	2.14231	2.62344	2.12134	2.42475	3.10411	0.66612	1.28992	0.66646	0.0747728
CD320	ENSG00000167775.6	3	0.979159	11.842	12.4757	13.0948	28.5899	48.1098	57.2481	85.1558	77.9013	88.3629
CD36	ENSG00000135218.13	4	0.782764	2.46121	1.20427	0.995088	0.942648	0.904046	0.256594	0.434086	0.175421	0.0705955
CD37	ENSG00000104894.7	4	0.835471	85.0814	95.0453	95.4021	54.0682	28.33	25.5789	59.2535	64.7818	69.8244
CD38	ENSG00000004468.8	3	0.839883	4.9138	5.69958	3.99332	5.53314	11.1024	7.18411	11.5674	16.8304	13.3976
CD3EAP	ENSG00000117877.6	1	0.898495	2.48607	3.33212	2.92188	23.807	46.1304	52.1875	39.4365	37.1736	39.7141
CD3G	ENSG00000160654.5	4	0.896208	83.5309	66.7601	70.7904	38.4059	22.97	24.0518	45.5115	45.705	45.3927
CD4	ENSG00000010610.5	4	0.74326	110.321	130.203	128.171	50.0092	30.6794	23.3552	72.6235	104.236	90.3039
CD40LG	ENSG00000102245.3	1	0.93689	75.6513	79.3444	80.3344	454.757	681.369	797.535	197.335	161.287	201.54
CD44	ENSG00000026508.12	1	0.784557	193.027	159.293	178.437	375.938	563.973	545.4	146.715	97.0593	117.65
CD48	ENSG00000117091.5	3	0.971746	139.324	144.379	128.099	169.198	274.245	316.866	331.384	344.101	430.755
CD5	ENSG00000110448.6	5	0.991493	186.495	204.17	209.773	179.81	137.734	127.9	392.495	420.069	454.774
CD52	ENSG00000169442.4	4	0.969877	340.244	360.205	388.711	162.266	61.4461	67.9882	139.988	138.832	121.263
CD58	ENSG00000116815.11	5	0.485374	3.578	1.8181	2.9761	4.72733	3.11648	2.79022	3.43134	3.5248	4.8444
CD59	ENSG00000085063.10	1	0.799207	9.39767	10.7713	9.74881	14.479	18.994	19.5945	7.85677	8.91728	10.6009
CD6	ENSG00000013725.10	5	0.784254	182.438	142.98	138.46	190.629	155.071	161.88	209.482	196.615	225.105
CD63	ENSG00000135404.7	3	0.943216	7.79456	6.32504	5.95683	14.456	17.7702	19.0117	27.3657	19.3922	22.3731
CD69	ENSG00000110848.4	1	0.952741	15.0178	10.573	11.391	311.749	396.766	448.596	127.698	97.886	97.9233
CD7	ENSG00000173762.3	3	0.903094	120.578	114.127	131.778	228.908	284.292	300.337	214.695	293.67	323.512
CD74	ENSG00000019582.10	5	0.922238	53.0295	53.3169	52.1665	116.451	139.179	113.272	311.451	384.026	395.527
CD79A	ENSG00000105369.5	4	0.523931	4.86709	4.20008	3.97885	3.75855	2.90483	0.936167	4.64751	4.76432	3.44813
CD79B	ENSG00000007312.8	5	0.991721	5.80704	6.19296	7.2485	4.26787	3.7687	1.57038	13.132	16.0597	17.0853
CD81	ENSG00000110651.7	1	0.914416	16.5083	17.7098	18.4655	37.1091	50.6197	56.2329	45.7241	44.7757	45.2732
CD82	ENSG00000085117.7	1	0.978073	7.19682	8.88001	10.2844	126.938	173.096	231.006	143.654	79.9366	127.568
CD83	ENSG00000112149.5	1	0.995035	6.19626	5.55825	4.56762	86.4749	111.153	126.373	58.0972	52.6251	56.4428
CD84	ENSG00000066294.10	2	0.520901	16.231	15.4207	29.059	27.4963	17.1864	25.2211	7.59435	5.23083	10.0224
CD86	ENSG00000114013.11	2	0.908105	1.21516	1.34303	0.785804	1.90839	2.08289	0.615332	0.702243	0.288723	0.143899
CD96	ENSG00000153283.8	2	0.827708	100.635	76.039	94.9286	131.343	70.6399	66.8924	41.5941	12.7383	11.4785
CD97	ENSG00000123146.15	1	0.886706	32.4313	30.7657	32.3173	112.444	132.597	139.692	104.529	123.298	134.281
CDC123	ENSG00000151465.9	3	0.984953	24.9451	20.1912	22.6337	61.8055	85.8119	106.211	139.933	157.332	169.868
CDC14A	ENSG00000079335.13	4	0.98717	25.3743	24.5245	27.8017	16.5281	6.96265	4.60506	5.28912	5.65122	6.04307
CDC14B	ENSG00000081377.12	4	0.947793	3.53844	3.70368	3.31855	1.98939	1.73649	0.514199	1.15632	0.728492	0.495605
CDC16	ENSG00000130177.10	3	0.755817	32.4675	16.0074	18.4391	35.996	32.9398	37.3574	39.0108	31.7621	37.4786
CDC20	ENSG00000117399.9	5	0.973857	1.41907	2.13477	1.8598	3.16787	2.96998	1.15891	39.0497	44.5371	51.7932
CDC23	ENSG00000094880.6	3	0.906415	14.355	12.2897	13.594	18.124	18.0568	19.28	32.3316	33.0805	38.784
CDC25A	ENSG00000164045.7	5	0.975993	1.83882	1.94774	1.32981	2.178	2.36196	0.476034	26.9947	41.7899	41.2069
CDC25B	ENSG00000101224.13	4	0.977264	123.317	135.393	141.578	50.0535	21.9547	11.1793	29.457	38.438	30.3099
CDC26	ENSG00000176386.4	3	0.772796	5.86377	4.57391	6.73827	7.32609	6.6714	6.20133	8.4048	7.16401	8.5213
CDC34	ENSG00000099804.4	5	0.848711	21.5785	18.9309	24.8962	17.2153	16.3093	19.851	27.8575	25.3753	31.2948
CDC37	ENSG00000105401.2	3	0.958325	35.132	37.0571	40.3831	71.5047	102.522	127.341	99.3893	115.57	135.457
CDC42	ENSG00000070831.11	3	0.994531	76.6284	64.4842	76.8978	103.726	127.879	139.055	153.976	143.971	166.157
CDC42-IT1	ENSG00000230068.2	2	0.841677	9.83363	9.98536	7.0596	6.47892	6.3092	3.84879	2.36692	1.21093	0.967994
CDC42BPG	ENSG00000171219.8	2	0.901689	5.21889	5.95977	5.69148	4.37192	3.9288	0.904407	2.20692	1.17159	0.340325
CDC42EP2	ENSG00000149798.3	1	0.860896	1.31824	2.08745	1.8206	3.29125	4.16816	5.18507	3.22207	3.71261	4.87421
CDC42EP3	ENSG00000163171.6	1	0.868761	4.94579	3.23993	3.49577	7.75031	10.4996	12.0711	4.29585	3.967	3.94104
CDC42EP4	ENSG00000179604.8	2	0.971881	1.47799	1.84006	1.85043	1.61177	2.12048	0.421528	0.952509	0.578146	0.112659
CDC42SE1	ENSG00000197622.8	4	0.978377	238.004	224.033	241.049	134.931	68.1115	67.7515	116.9	102.442	115.102
CDC45	ENSG00000093009.5	5	0.969675	2.36114	2.60777	2.10127	3.46575	3.2076	0.900512	26.7445	47.926	46.5406
CDC5L	ENSG00000096401.7	3	0.97159	15.1634	13.0823	13.7168	20.5219	23.7909	26.3583	26.6858	24.6812	27.3458
CDC6	ENSG00000094804.5	5	0.968774	2.13784	2.14403	1.89277	3.07555	3.11	1.6196	50.9373	80.1427	67.8212
CDC7	ENSG00000097046.8	5	0.980946	5.43596	4.64578	7.09119	4.85838	3.22576	2.69482	15.4065	25.3258	22.1289
CDCA2	ENSG00000184661.9	5	0.961602	0.979463	1.17876	1.1423	1.60614	1.54883	0.398622	5.54715	10.7114	9.08448
CDCA3	ENSG00000111665.7	5	0.625358	1.47461	2.2334	1.81777	1.79241	1.98348	0.382247	1.83219	3.24092	1.9957
CDCA4	ENSG00000170779.10	3	0.89852	7.142	6.61953	7.97706	17.8766	23.0199	26.9758	51.2986	76.0723	73.4709
CDCA5	ENSG00000146670.5	5	0.966627	1.40865	1.97782	1.54508	2.23885	2.62918	0.691367	19.4291	35.8475	35.2374
CDCA7	ENSG00000144354.9	5	0.969331	1.72976	1.92992	1.81988	1.50435	1.91693	0.702559	31.1771	50.5016	41.9767
CDCA7L	ENSG00000164649.15	5	0.937863	40.4008	25.6926	31.5494	27.4463	24.8675	27.3833	44.2717	68.1754	71.5752
CDCA8	ENSG00000134690.6	5	0.979723	2.23935	2.72955	2.28566	3.23227	2.65247	0.976955	18.0481	25.5471	23.4322
CDH11	ENSG00000140937.9	2	0.980147	1.07184	1.35872	1.16323	1.59993	1.75047	0.314076	0.796423	0.380124	0.0533095
CDH13	ENSG00000140945.11	2	0.992197	1.15462	1.21765	1.04902	1.44302	1.5413	0.358642	0.566276	0.37844	0.0345351
CDH15	ENSG00000129910.3	2	0.99365	1.92986	2.10134	2.00197	2.61565	2.61574	0.532056	1.03051	0.641953	0.152357
CDH17	ENSG00000079112.5	2	0.97329	1.37371	1.48702	1.38185	2.04575	2.21295	0.386456	0.963231	0.341738	0.0542251
CDH22	ENSG00000149654.5	2	0.963045	1.48412	2.47492	2.15313	2.21942	2.69757	0.621907	1.29011	0.641388	0.0786791
CDH4	ENSG00000179242.11	2	0.971547	1.35379	1.61148	1.8542	1.97396	2.27292	0.411106	0.996009	0.583547	0.115368
CDH5	ENSG00000179776.13	2	0.986322	1.38415	1.55988	1.2293	1.75997	1.94757	0.53953	0.848559	0.447281	0.0768864
CDH8	ENSG00000150394.9	2	0.977105	0.679029	0.762965	0.628802	1.02069	0.894791	0.282294	0.427294	0.230861	0.0443005
CDHR3	ENSG00000128536.11	4	0.928508	4.58568	3.30114	4.042	2.71916	2.28969	0.559269	1.46578	0.80503	0.453561
CDIP1	ENSG00000089486.12	3	0.968001	16.8806	13.9313	13.1829	16.6605	21.8075	25.8561	27.2925	27.487	30.77
CDIPT	ENSG00000103502.9	5	0.710514	32.1057	32.4295	33.0834	24.6217	18.5621	17.8943	31.208	34.8931	36.0188
CDK1	ENSG00000170312.11	5	0.946865	0.696329	0.80746	0.818797	0.665229	0.913828	0.282821	4.53517	9.2178	6.52977
CDK11B	ENSG00000248333.3	3	0.935202	10.7617	12.2646	13.7779	16.2148	16.1679	19.282	17.5919	20.2737	24.1944
CDK12	ENSG00000167258.9	1	0.974785	28.4691	26.4143	29.6477	46.3189	53.7189	62.4798	48.0004	41.101	49.2631
CDK16	ENSG00000102225.11	1	0.839548	12.634	15.7826	18.6041	21.6749	29.4911	33.9302	22.2778	27.732	30.9484
CDK19	ENSG00000155111.10	4	0.976467	7.18888	6.04538	6.22317	4.76584	2.52624	1.05516	2.4403	1.93445	1.58695
CDK2	ENSG00000123374.6	5	0.985162	9.19637	7.75518	9.82015	6.2404	5.07089	4.09089	34.2685	51.9007	52.3398
CDK2AP1	ENSG00000111328.2	5	0.927458	3.28526	3.56933	2.33139	4.96394	5.94017	4.26989	14.8382	14.1103	17.1795
CDK2AP2	ENSG00000167797.3	3	0.896412	33.8727	30.675	32.0393	49.5196	47.0822	58.9137	112.286	101.684	98.5719
CDK4	ENSG00000135446.12	3	0.985979	13.6667	16.749	18.1591	84.6584	166.881	202.309	231.715	286.006	314.483
CDK5	ENSG00000164885.8	5	0.993824	4.63232	5.1974	5.41836	4.39491	3.74885	1.79594	12.4288	17.2944	17.2917
CDK5R1	ENSG00000176749.4	5	0.726402	33.5327	9.72401	10.3021	10.6358	6.03389	5.97216	20.1495	27.6796	32.6224
CDK5R2	ENSG00000171450.4	2	0.996246	1.59915	1.74026	1.58349	1.8651	1.94484	0.381916	0.770782	0.518013	0.0846129
CDK5RAP1	ENSG00000101391.16	1	0.875538	12.1436	9.89987	11.8956	16.4533	15.7302	18.1335	15.9806	15.204	17.3382
CDK6	ENSG00000105810.5	1	0.948395	8.29101	7.68181	7.70146	46.4432	95.1068	95.4216	69.2431	53.0639	65.7401
CDK7	ENSG00000134058.6	3	0.91474	5.00358	4.65705	5.48928	7.96883	6.50872	7.95357	11.9874	9.81647	11.1003
CDK8	ENSG00000132964.7	3	0.983436	9.49438	7.98764	9.32931	12.9268	15.636	18.1327	16.7639	17.7235	20.2293
CDK9	ENSG00000136807.7	3	0.851556	50.3844	49.08	55.4222	52.0375	55.5999	63.4182	58.9006	72.471	74.4829
CDKAL1	ENSG00000145996.7	5	0.868496	17.9596	13.4896	17.4075	20.6413	16.9317	19.0952	27.4152	25.0109	29.46
CDKN1A	ENSG00000124762.9	1	0.828144	3.24856	3.02933	2.17272	14.7194	16.3549	11.9023	13.7501	13.5258	9.54316
CDKN1B	ENSG00000111276.6	4	0.97161	88.1475	97.2336	87.1648	47.4658	21.8856	15.5172	17.1034	18.0216	15.2761
CDKN1C	ENSG00000129757.8	2	0.875278	2.33539	2.86996	3.38737	2.28852	1.9569	0.73843	1.00595	0.692263	0.0954322
CDKN2A	ENSG00000147889.12	2	0.984999	2.01053	2.53982	2.20142	2.38436	2.84148	0.60531	1.44522	0.605964	0.24839
CDKN2AIPNL	ENSG00000237190.3	3	0.913211	9.00474	8.39961	8.67691	11.4318	15.9824	15.7878	24.6764	30.7402	27.0686
CDKN2D	ENSG00000129355.6	5	0.644344	4.92369	7.83258	6.8369	6.08527	6.46985	7.48934	6.76293	8.61632	10.7432
CDKN3	ENSG00000100526.15	5	0.978999	1.44171	1.3526	2.07232	2.25519	1.41055	0.714355	9.24496	14.7859	13.1268
CDON	ENSG00000064309.10	3	0.766673	1.27591	1.60957	1.97857	1.6411	2.35897	1.84416	2.30871	2.29254	2.32486
CDPF1	ENSG00000205643.6	5	0.862626	8.52731	5.40349	7.09954	5.99279	5.1964	3.93495	8.049	9.02362	9.79414
CDR2L	ENSG00000109089.7	5	0.734195	1.80418	1.56814	1.35775	2.13013	2.38525	0.525828	2.37055	2.81145	2.52251
CDS1	ENSG00000163624.5	2	0.910696	1.81143	1.66369	2.02027	1.78894	1.35683	0.687151	0.701928	0.367145	0.252897
CDT1	ENSG00000167513.4	5	0.977497	1.73386	2.0713	2.55008	2.5535	2.70672	0.858624	46.3255	66.0281	67.2769
CDV3	ENSG00000091527.11	1	0.980332	73.3935	58.5057	67.7761	159.686	229.355	276.369	170.026	154.075	178.311
CEACAM21	ENSG00000007129.13	4	0.927372	17.4892	17.5841	15.9185	11.0805	6.43993	4.279	11.1805	10.6001	8.98774
CEACAM4	ENSG00000105352.6	2	0.969569	2.18265	3.25217	1.97603	2.95827	2.90987	0.626309	1.27145	0.586417	0.129235
CEBPG	ENSG00000153879.4	1	0.973092	10.9918	9.74716	9.12744	23.1133	25.2621	30.2698	15.3444	15.6294	16.6246
CEBPZ	ENSG00000115816.9	1	0.974408	23.8846	20.6627	23.4883	58.7823	88.0433	101.806	61.8866	58.3356	71.0159
CECR1	ENSG00000093072.11	4	0.961785	50.1654	54.3467	75.7333	24.7042	6.68465	5.08783	3.83628	3.04061	3.6793
CECR2	ENSG00000099954.14	2	0.978213	0.921417	1.09058	0.986376	1.47012	1.26853	0.284437	0.653476	0.315954	0.0344056
CECR3	ENSG00000241832.1	2	0.964327	2.62068	2.58371	2.37511	2.38803	2.27988	0.682274	0.930775	0.636477	0.110461
CECR5	ENSG00000069998.8	3	0.903974	6.56568	6.77479	8.46379	16.6221	19.2382	27.3556	20.7101	19.577	23.1846
CELA1	ENSG00000139610.1	4	0.861547	4.46749	6.98944	9.02446	3.67339	3.64803	0.791788	2.68195	1.04025	0.407363
CELF1	ENSG00000149187.13	3	0.899902	40.009	33.6211	41.3357	62.2551	75.8002	97.4817	75.7236	71.3265	88.2786
CELF2	ENSG00000048740.13	4	0.615591	92.2204	74.0485	99.5759	53.3941	44.8142	42.373	85.3107	75.4454	82.8732
CELSR2	ENSG00000143126.7	4	0.71575	4.62879	4.17244	3.79911	3.72499	2.87659	0.878975	3.7723	3.82773	2.5523
CELSR3	ENSG00000008300.10	1	0.98227	2.23554	2.10688	2.59575	7.47021	9.23818	12.6065	7.19764	6.13519	7.34656
CENPB	ENSG00000125817.7	3	0.93711	30.8795	33.3719	39.1484	40.035	57.8239	71.2377	73.0241	98.0394	105.121
CENPBD1	ENSG00000177946.4	5	0.897271	5.09682	4.79988	5.50854	4.97975	5.03927	4.95728	7.1636	6.22063	6.86559
CENPE	ENSG00000138778.7	5	0.816754	1.37805	0.939425	1.01673	1.37674	1.11372	0.276695	2.21384	1.79072	1.70229
CENPF	ENSG00000117724.8	5	0.856496	2.38489	2.44299	2.37599	2.02202	1.8547	0.659228	3.21352	3.62505	2.95936
CENPH	ENSG00000153044.5	5	0.97033	3.56316	2.50903	2.62744	2.71722	3.0953	3.06798	14.4908	18.2299	21.1941
CENPI	ENSG00000102384.9	5	0.972362	0.979965	1.63145	1.45556	0.991723	1.71474	0.416838	4.18469	6.51202	6.22249
CENPJ	ENSG00000151849.10	5	0.972058	4.89862	5.08162	5.08404	3.47813	2.55283	1.00445	8.3134	10.6888	9.9703
CENPK	ENSG00000123219.8	5	0.678803	15.6234	4.13478	3.75043	7.46543	1.74889	0.710895	10.2336	13.0733	11.8308
CENPL	ENSG00000120334.11	5	0.976295	4.27555	3.52408	4.61079	3.63126	3.23082	2.41341	6.75454	6.73576	6.99511
CENPM	ENSG00000100162.10	5	0.941463	2.15284	2.49492	2.13176	3.78241	3.46009	1.3849	17.2591	33.4191	22.7831
CENPN	ENSG00000166451.9	5	0.949522	1.88336	1.8649	2.03017	4.74981	6.11822	5.54914	23.4929	34.3208	36.4213
CENPO	ENSG00000138092.6	5	0.956546	3.59174	3.67943	3.64816	4.79379	6.34776	5.46417	21.3282	25.2225	26.4192
CENPP	ENSG00000188312.9	3	0.903215	1.85973	1.71695	1.81571	2.92237	4.55176	2.96748	5.43851	5.26898	4.77972
CENPQ	ENSG00000031691.6	5	0.985992	4.46656	2.85505	4.56865	4.70849	2.74834	2.46476	16.9012	18.2643	20.0994
CENPV	ENSG00000166582.5	3	0.953965	5.98604	5.74396	6.65923	25.2022	39.0095	52.4788	39.1125	44.9062	51.4434
CENPW	ENSG00000203760.4	5	0.967775	2.0329	1.28765	1.16542	1.69185	1.37294	1.39062	8.96822	15.2357	15.4769
CEP104	ENSG00000116198.8	1	0.912084	13.1112	12.001	13.3572	16.9978	18.7593	20.0983	18.7533	15.8963	19.0064
CEP112	ENSG00000154240.12	2	0.967587	1.40883	1.44551	0.976529	1.79359	1.7193	0.499384	0.816298	0.320281	0.0853423
CEP128	ENSG00000100629.12	5	0.963174	2.23962	1.75196	2.43947	2.00207	2.14233	1.30724	3.64792	3.6625	4.72299
CEP152	ENSG00000103995.9	5	0.986483	5.02993	3.98963	3.89793	4.43511	3.41364	2.99003	8.28652	8.82281	9.82385
CEP170	ENSG00000143702.11	1	0.983892	7.69817	5.56808	7.14543	16.55	18.423	23.6767	12.2604	11.5009	13.9616
CEP170B	ENSG00000099814.11	1	0.530849	2.36313	3.30611	2.3049	5.30611	6.83655	2.97366	4.71099	4.73006	2.64942
CEP192	ENSG00000101639.14	4	0.597286	19.3379	14.3428	18.0167	13.0557	7.54951	8.19002	15.727	15.1479	17.9216
CEP250	ENSG00000126001.11	5	0.697951	10.1903	10.2103	10.1186	8.26864	5.9271	3.4433	11.2959	10.9438	10.7727
CEP44	ENSG00000164118.8	4	0.69231	6.54774	5.05957	5.65695	4.27471	2.79648	2.55065	4.62691	5.15368	5.46725
CEP55	ENSG00000138180.11	5	0.971936	1.1442	0.834553	1.26175	1.17876	1.85045	0.245807	9.10164	15.394	13.6452
CEP57	ENSG00000166037.6	5	0.725501	17.1416	15.0768	16.3332	12.5139	8.46799	7.25369	14.3348	18.2588	19.4225
CEP57L1	ENSG00000183137.10	5	0.838249	2.49946	2.24143	2.1738	2.14691	1.51185	0.804721	3.04083	2.84248	3.0092
CEP68	ENSG00000011523.9	4	0.976164	23.6253	21.5073	24.8006	11.0643	5.50043	4.2309	3.06708	2.57521	2.46947
CEP72	ENSG00000112877.6	5	0.921187	9.13859	9.25831	10.4767	9.21686	9.98232	8.54478	11.4048	11.7454	13.5894
CEP76	ENSG00000101624.6	5	0.916998	3.32895	3.13079	3.02281	3.4219	2.93264	2.35021	3.63768	4.0885	4.06484
CEP78	ENSG00000148019.8	5	0.91899	5.72406	4.58774	5.36292	5.08464	3.38013	3.52868	7.14135	7.20657	7.02897
CEP85	ENSG00000130695.9	3	0.967082	10.2999	8.04157	10.3137	19.2756	20.9446	25.9221	22.762	24.2897	27.1764
CEP97	ENSG00000182504.6	5	0.964474	7.01864	6.11888	6.92348	5.50216	5.68344	4.65687	8.01048	10.1026	10.5212
CERK	ENSG00000100422.9	4	0.928471	94.5007	53.1916	78.1389	38.642	12.7198	12.2526	31.5891	31.5096	33.7346
CERS2	ENSG00000143418.15	3	0.985005	34.3138	30.1505	31.3475	43.7044	56.0139	61.768	78.232	75.801	84.5203
CERS5	ENSG00000139624.8	5	0.85894	8.14457	6.77257	9.32118	8.71516	7.01826	6.89909	11.2419	9.63989	11.111
CES5A	ENSG00000159398.11	2	0.984904	1.85838	2.34301	2.26081	2.57475	2.94211	0.470525	1.33816	0.641953	0.0880284
CETN2	ENSG00000147400.8	5	0.937764	6.57369	6.23874	5.11137	6.18563	6.07299	4.48307	9.69474	9.04816	9.56357
CETN3	ENSG00000153140.4	5	0.843343	3.39586	2.85638	3.22704	2.62711	1.9807	1.14871	3.72239	3.69119	4.37003
CFDP1	ENSG00000153774.4	5	0.954912	6.689	6.47066	6.8843	7.21788	6.85062	7.09442	9.48563	9.90555	10.3147
CFH	ENSG00000000971.11	2	0.969427	0.731123	0.58659	0.765336	0.748704	0.925984	0.172773	0.378577	0.168371	0.051948
CFL1	ENSG00000172757.8	3	0.915505	41.8994	43.752	44.4487	68.8227	91.069	106.83	206.245	230.335	228.658
CFLAR	ENSG00000003402.15	1	0.948324	24.301	17.4946	22.8928	38.1313	48.7852	52.3266	30.6925	23.7719	28.3163
CFP	ENSG00000126759.8	4	0.924603	6.71045	9.76855	10.7678	3.3704	3.20925	1.04326	1.4528	1.45665	1.0555
CGNL1	ENSG00000128849.9	2	0.967546	1.84766	2.17826	1.81984	1.99954	2.8203	0.615451	1.34141	0.541302	0.130349
CGREF1	ENSG00000138028.10	3	0.875408	1.05792	1.50986	1.28931	3.06687	3.37004	2.76441	4.2747	3.68047	3.20427
CHAC1	ENSG00000128965.7	1	0.908016	1.41008	1.33097	2.01228	50.627	58.3457	70.3922	6.99942	11.3655	12.0326
CHAC2	ENSG00000143942.4	3	0.979543	1.93174	2.00191	1.97659	8.34913	13.5958	16.8902	22.4641	26.4404	31.1987
CHAF1A	ENSG00000167670.11	5	0.982156	5.30271	4.74259	5.38795	5.2562	4.87015	2.79373	34.8726	41.9522	47.1138
CHAF1B	ENSG00000159259.7	5	0.978131	1.97777	2.16684	2.23819	2.52291	2.57857	1.46299	17.3098	24.2839	24.1304
CHAMP1	ENSG00000198824.4	5	0.946105	19.5556	19.2847	22.4771	24.5098	25.1698	25.7712	57.2722	60.3467	61.6694
CHCHD1	ENSG00000172586.7	3	0.957032	5.73573	6.61518	5.62279	7.86034	8.6982	9.99621	10.9146	11.455	14.5966
CHCHD10	ENSG00000250479.4	5	0.955153	15.6987	20.3231	18.8275	15.7579	25.1714	24.5718	96.2061	157.258	169.615
CHCHD2	ENSG00000106153.12	3	0.934241	27.5772	37.8305	26.7864	70.4989	108.781	123.633	147.884	226.752	186.835
CHCHD3	ENSG00000106554.7	5	0.900954	99.0624	108.137	103.892	91.6218	106.859	110.871	128.792	164.824	172.92
CHCHD4	ENSG00000163528.8	3	0.980985	5.04884	5.64213	4.38044	11.9625	16.5471	18.5498	21.9764	27.4096	28.6786
CHCHD5	ENSG00000125611.11	5	0.854784	3.55269	4.26649	3.40588	5.65347	4.4083	3.86349	6.02334	6.48499	8.08463
CHCHD6	ENSG00000159685.6	1	0.954557	4.64864	5.58833	5.15186	9.28163	13.0722	12.222	9.99046	9.38789	9.65918
CHD1	ENSG00000153922.6	1	0.950757	33.9045	26.9074	32.6348	48.4663	50.735	56.7899	38.4143	33.3329	41.5405
CHD1L	ENSG00000131778.13	1	0.948572	19.6877	16.0742	21.3445	46.9362	53.1171	70.5617	50.0322	43.0057	52.9458
CHD4	ENSG00000111642.10	1	0.91712	51.3051	52.8461	54.5557	112.703	139.506	149.6	121.537	121.469	134.102
CHD6	ENSG00000124177.10	4	0.978713	24.7971	22.5427	25.9265	16.5758	9.83199	7.83732	8.21266	6.58245	7.09652
CHD7	ENSG00000171316.7	1	0.843641	28.2935	14.5862	17.2715	35.3028	44.0357	46.5359	22.0182	19.4602	20.9822
CHEK1	ENSG00000149554.8	5	0.971248	1.09086	1.38054	1.26021	1.71123	2.02998	1.09711	25.4549	30.861	37.9089
CHEK2	ENSG00000183765.16	5	0.953636	3.57071	3.68395	3.3732	3.87229	3.06417	1.51544	5.0324	7.11243	6.32811
CHERP	ENSG00000085872.10	3	0.961223	18.8128	19.3137	21.4532	36.0991	45.4172	57.4451	50.0258	47.2797	59.7836
CHI3L2	ENSG00000064886.9	4	0.79405	20.6263	5.90288	9.96936	10.6132	2.71028	1.35734	3.24571	2.63561	2.71771
CHIA	ENSG00000134216.14	2	0.966931	1.0651	1.45493	0.945568	1.50996	1.32816	0.206129	0.561613	0.419376	0.0685014
CHID1	ENSG00000177830.13	1	0.895323	5.33583	5.82784	6.11714	10.1619	14.7612	15.9058	14.3022	12.129	13.4381
CHIT1	ENSG00000133063.11	2	0.981169	1.55156	1.4788	1.36204	1.85601	1.98966	0.409558	1.01583	0.52231	0.123143
CHKA	ENSG00000110721.7	3	0.890634	3.15934	2.26635	3.67155	6.61469	9.39286	9.48789	10.2014	7.58444	8.56605
CHML	ENSG00000203668.1	5	0.882551	16.4762	12.0404	16.9099	10.1982	11.5096	14.9663	19.486	23.608	29.3131
CHMP1A	ENSG00000131165.10	3	0.988457	18.3486	18.3485	20.2169	29.0695	32.6012	39.8195	46.7623	48.4901	54.6744
CHMP2A	ENSG00000130724.4	3	0.996111	17.0601	15.1461	15.9832	30.1983	35.701	39.7013	45.3454	48.4658	56.3357
CHMP2B	ENSG00000083937.4	3	0.960335	8.18842	6.81138	8.05403	12.3561	14.6316	17.6513	14.5793	16.825	18.3201
CHMP4B	ENSG00000101421.3	3	0.973262	44.4942	35.5532	40.7325	74.9597	90.3648	97.4513	89.6456	97.6527	110.8
CHMP5	ENSG00000086065.9	5	0.968409	11.4454	9.95312	10.3921	13.8691	10.069	9.95158	18.5417	22.6288	23.9396
CHMP6	ENSG00000176108.5	3	0.766221	18.7953	17.6414	20.9179	19.4747	19.0207	23.8448	27.203	23.7023	23.1707
CHMP7	ENSG00000147457.9	4	0.979397	142.269	125.965	139.092	96.5141	36.2575	35.6821	36.1942	32.3825	40.8564
CHORDC1	ENSG00000110172.7	1	0.926709	10.2983	7.1256	9.36749	22.8905	24.5016	37.2776	26.7839	21.0197	25.1569
CHP1	ENSG00000187446.7	5	0.910537	16.6419	15.4448	17.4712	21.401	20.633	24.7336	46.3234	44.1366	54.4946
CHPF	ENSG00000123989.9	3	0.953903	4.46354	5.03601	4.79654	10.8543	19.6737	22.3243	30.5647	41.4166	41.1628
CHPF2	ENSG00000033100.10	1	0.83574	20.2526	21.144	22.7617	32.0457	28.3268	30.917	30.9575	23.3432	27.9273
CHPT1	ENSG00000111666.6	3	0.794851	2.80514	2.48646	3.75969	2.4493	3.35492	3.8501	4.09205	4.52325	5.64885
CHRAC1	ENSG00000104472.5	3	0.963522	10.3846	10.1821	11.9415	27.5443	36.4321	39.5501	36.7616	36.3469	42.7102
CHRM3-AS2	ENSG00000233355.2	4	0.879506	38.2468	18.9815	35.2755	24.8131	8.59181	11.9562	5.45855	3.04361	4.84626
CHRNA4	ENSG00000101204.11	2	0.944946	1.23714	1.48496	1.57229	2.36185	2.47725	0.374071	0.965464	0.488547	0.0767123
CHRNA5	ENSG00000169684.9	3	0.828105	1.19738	1.36567	0.883433	1.50973	2.13626	2.26086	2.84549	3.88987	6.79223
CHRNA6	ENSG00000147434.4	1	0.979672	0.950218	1.24872	1.0707	13.8509	16.5505	19.7447	7.66403	6.99867	6.6002
CHRNA9	ENSG00000174343.5	2	0.942041	1.74525	1.83108	1.38254	2.26435	1.44079	0.380698	0.897178	0.432832	0.0779001
CHST1	ENSG00000175264.3	2	0.972384	1.51632	2.20748	2.17957	2.57816	2.22532	0.592391	1.19119	0.459961	0.12164
CHST10	ENSG00000115526.6	3	0.95185	3.16938	2.85499	3.42025	4.46141	5.80039	5.00055	8.15796	7.28301	8.29862
CHST14	ENSG00000169105.6	5	0.651385	9.07213	7.5431	9.71275	5.76264	4.56785	3.27532	7.55324	9.4789	9.48071
CHST15	ENSG00000182022.13	4	0.807488	8.16794	4.81664	3.44548	4.75292	2.5345	1.07125	1.62831	1.05336	0.568744
CHST2	ENSG00000175040.4	5	0.988226	7.35779	7.71779	8.36072	7.09514	5.62827	3.66273	16.7775	16.6573	18.2076
CHST3	ENSG00000122863.5	1	0.808661	1.09835	1.28511	1.34137	4.24541	3.41669	3.22277	3.06875	2.29519	1.5832
CHSY1	ENSG00000131873.5	1	0.915017	5.94125	4.60704	5.4737	71.9768	77.8628	86.5096	27.5341	13.1787	15.1684
CHTF18	ENSG00000127586.12	5	0.986271	5.79438	7.0224	6.42106	5.0321	4.79695	2.69268	20.5447	27.3436	31.0123
CHTF8	ENSG00000168802.8	5	0.989044	19.9138	17.3489	18.3246	19.7731	15.692	15.1662	27.711	29.7238	31.7017
CHUK	ENSG00000213341.6	3	0.978079	6.80193	5.86116	6.21257	13.9783	17.23	19.2652	18.8579	19.1765	21.0067
CIAO1	ENSG00000144021.2	3	0.984938	38.6161	34.3471	39.1366	59.9272	71.7059	84.7218	78.4693	82.7077	93.303
CIAPIN1	ENSG00000005194.10	3	0.99114	12.3143	12.5201	13.97	27.6748	37.8921	42.3613	48.8878	53.2315	53.2799
CIB1	ENSG00000185043.6	5	0.973889	62.6872	53.4965	61.3306	49.8317	53.3133	51.7029	103.147	145.301	145.46
CIB2	ENSG00000136425.8	5	0.57948	2.18003	2.74286	2.35494	2.21455	2.86675	0.842999	3.45703	3.79827	2.15212
CIDEB	ENSG00000136305.7	5	0.960198	7.84646	8.42934	8.11205	5.35542	4.28182	2.85988	13.6327	25.095	21.1444
CILP2	ENSG00000160161.5	2	0.835844	2.22407	2.05441	1.87389	4.05153	3.9372	1.93632	1.39218	1.03085	0.37196
CINP	ENSG00000100865.10	5	0.90091	9.54766	9.93798	10.3853	11.2848	14.7658	14.4432	22.7624	26.5912	29.2196
CIRH1A	ENSG00000141076.13	1	0.896842	8.30995	9.32506	10.4822	53.4601	87.3668	105.201	73.0452	75.5951	86.8445
CISD1	ENSG00000122873.7	3	0.989838	5.71638	3.43378	4.51065	13.3074	22.3668	27.5797	34.5159	37.5692	42.4126
CISD2	ENSG00000145354.5	3	0.961358	5.64463	5.66096	5.88015	9.01154	10.543	12.3944	16.6308	19.2418	19.7847
CISD3	ENSG00000230055.2	3	0.910297	5.46204	6.11853	6.86352	10.2363	18.5933	18.946	16.3715	31.0378	33.3754
CISH	ENSG00000114737.11	3	0.911905	4.32626	3.75471	3.39418	19.2773	46.9152	36.4308	95.4619	85.8795	72.1452
CIT	ENSG00000122966.9	5	0.980077	1.77451	1.97309	2.0691	2.49418	2.30253	0.630525	4.66081	6.29926	6.04111
CITED2	ENSG00000164442.8	4	0.970197	54.3966	60.2384	69.2077	26.1783	14.6985	12.1174	13.7871	16.6343	18.4558
CIZ1	ENSG00000148337.15	5	0.913271	33.1426	32.919	38.7444	33.4003	29.588	34.089	58.5796	49.0415	57.4897
CKAP2	ENSG00000136108.10	5	0.905597	9.63413	8.36748	9.57687	5.36393	2.7278	2.53084	10.4357	15.7316	15.8948
CKAP2L	ENSG00000169607.8	5	0.962754	0.543967	0.716997	0.630981	0.606199	1.12407	0.257091	3.88172	5.31704	4.2644
CKAP4	ENSG00000136026.9	3	0.941002	11.1061	7.05811	9.53878	13.2605	14.7012	16.2995	14.5528	18.6258	19.8178
CKAP5	ENSG00000175216.10	3	0.979238	17.8143	15.71	17.6794	23.6367	29.581	33.3544	41.4497	44.4708	48.4344
CKB	ENSG00000166165.8	5	0.826911	2.00781	1.94969	1.92504	2.48612	2.63959	1.33679	2.54497	3.36795	3.17021
CKS1B	ENSG00000173207.8	5	0.882073	1.56442	1.78787	1.62116	2.72303	2.33424	1.41858	2.84345	3.68185	3.92061
CKS2	ENSG00000123975.4	3	0.86286	4.16285	3.89657	2.88547	24.4284	32.5359	24.5932	112.772	87.7356	82.7035
CLASP1	ENSG00000074054.13	5	0.811028	21.5201	18.923	20.5202	15.9963	10.6119	10.6354	22.813	23.2296	24.9573
CLASP2	ENSG00000163539.11	5	0.898101	10.5337	7.79886	10.2265	10.7402	9.57824	10.1031	14.6194	13.4946	15.8407
CLCN1	ENSG00000188037.6	2	0.9927	2.98459	3.22546	3.10824	3.79721	3.75176	0.729613	1.76317	1.12908	0.191953
CLCN2	ENSG00000114859.10	5	0.661455	2.69657	2.86345	3.31809	2.77993	3.67762	2.15534	3.7506	3.18742	4.06793
CLCN4	ENSG00000073464.7	2	0.818851	0.705691	1.54185	1.21039	0.743915	1.82283	0.528578	0.442486	0.394999	0.0835683
CLCN5	ENSG00000171365.11	1	0.887123	1.26562	1.54242	1.49119	2.1617	2.9154	2.51284	2.49965	2.06605	2.49334
CLCN6	ENSG00000011021.17	1	0.872149	6.77127	5.83666	7.75723	10.6159	10.5079	11.5849	8.8734	8.79747	11.7023
CLDN1	ENSG00000163347.5	1	0.780041	0.55732	0.60551	0.643842	6.14435	8.23501	5.172	0.841695	0.50952	0.34649
CLDN11	ENSG00000013297.6	2	0.984261	1.26915	1.31524	1.43825	1.85818	1.7437	0.416546	0.798639	0.435702	0.0526025
CLDND1	ENSG00000080822.12	3	0.795125	26.5764	15.992	22.7806	34.5129	32.4098	32.8849	49.3004	35.4608	35.0999
CLEC16A	ENSG00000038532.10	3	0.974322	9.41482	9.41348	10.1689	12.6575	13.1178	13.922	14.3344	13.5659	14.9948
CLEC2B	ENSG00000110852.4	4	0.861739	12.3496	10.8655	11.4944	12.3727	5.67975	4.81948	3.67056	2.41126	3.64849
CLEC2D	ENSG00000069493.10	1	0.909835	160.371	103.964	130.123	230.257	305.663	377.351	168.96	136.667	166.431
CLEC5A	ENSG00000258227.2	2	0.770449	3.91416	2.06605	1.36675	2.36712	1.70624	0.340775	0.758368	0.44279	0.0341539
CLIC1	ENSG00000213719.4	5	0.910687	18.7029	19.6795	18.6066	67.9207	86.8615	101.85	298.966	326.935	355.531
CLIC3	ENSG00000169583.12	2	0.950327	4.04708	2.97161	2.57623	3.2759	3.54079	0.768512	1.55532	0.51778	0.0898608
CLIC4	ENSG00000169504.10	1	0.957755	0.98402	1.06278	0.655838	5.60552	7.92487	9.0778	3.08656	4.75373	6.21969
CLIC5	ENSG00000112782.11	2	0.932816	2.42583	1.9749	2.50099	2.73773	1.86435	0.53953	1.13141	0.498399	0.189259
CLINT1	ENSG00000113282.9	3	0.926204	20.4103	16.7319	20.8984	34.217	47.0266	54.7739	43.2945	44.9618	51.9308
CLIP1	ENSG00000130779.15	5	0.963803	7.76841	6.8432	7.35117	7.01695	6.77222	5.79227	10.3929	9.70873	10.3713
CLIP3	ENSG00000105270.10	4	0.695361	2.59332	3.23407	7.39119	3.18546	3.18303	1.73191	1.41763	1.15116	0.803808
CLK1	ENSG00000013441.11	4	0.951995	100.762	75.5695	90.7529	63.0215	28.7321	29.4747	19.3635	17.1977	19.2064
CLK4	ENSG00000113240.8	4	0.935891	20.5245	16.0301	19.6327	14.824	7.96416	7.93989	5.97006	4.63377	5.05428
CLN6	ENSG00000128973.7	1	0.92747	9.50267	9.69168	11.7222	68.6997	119.001	141.087	93.4516	95.6332	98.398
CLN8	ENSG00000182372.6	1	0.888156	6.03009	5.44804	5.2753	9.89436	10.3618	10.4395	7.29349	6.0907	5.68537
CLNS1A	ENSG00000074201.4	3	0.980258	25.5072	21.2153	23.4783	34.1333	35.3516	41.4974	42.299	46.9064	55.0712
CLOCK	ENSG00000134852.10	1	0.84317	7.33309	4.94639	5.95084	9.59044	9.79441	14.1032	11.1363	9.26485	12.2863
CLP1	ENSG00000172409.5	3	0.984726	6.3651	6.04754	5.79013	9.50298	11.1199	13.854	13.0223	14.2374	15.0842
CLPB	ENSG00000162129.8	3	0.989785	8.01969	9.33297	10.2499	24.9597	35.3342	42.142	49.0504	57.8178	60.6972
CLPP	ENSG00000125656.4	5	0.90764	25.8621	24.2878	29.9388	36.3637	52.0982	61.5125	124.943	146.583	157.828
CLPTM1	ENSG00000104853.11	3	0.899142	18.5934	18.5656	19.6194	30.6097	40.0967	44.1976	41.3287	35.2411	39.031
CLPTM1L	ENSG00000049656.9	1	0.913514	16.4622	15.7032	16.3139	36.9641	50.4834	58.0999	47.3878	41.5048	49.2941
CLPX	ENSG00000166855.5	3	0.976154	16.3549	14.2152	16.4878	20.262	20.6775	21.2934	24.9206	25.6671	28.07
CLSPN	ENSG00000092853.9	5	0.975312	1.8864	2.14411	1.82124	2.33658	2.54897	0.724388	20.9665	32.5212	29.5217
CLSTN2-AS1	ENSG00000250433.1	2	0.913832	1.01075	1.55219	0.719366	1.29858	1.03169	0.317225	0.554545	0.212157	0.0392745
CLSTN3	ENSG00000139182.9	4	0.838446	9.63983	9.92867	11.9502	6.59614	4.13383	1.79341	6.75768	8.10054	7.56463
CLTA	ENSG00000122705.12	3	0.963467	17.1813	17.5702	18.7881	31.5889	35.5874	43.1789	64.6852	65.3196	76.7488
CLTB	ENSG00000175416.8	3	0.97719	10.9299	10.5013	10.3272	24.9347	31.2425	37.6829	33.9745	34.4839	42.6557
CLTC	ENSG00000141367.7	3	0.983453	29.7378	23.763	26.9781	70.8169	75.1153	95.712	99.2677	92.764	108.085
CLUH	ENSG00000132361.12	3	0.912437	9.09782	9.24777	11.3647	59.285	99.6147	129.243	90.5041	86.4514	114.493
CLVS2	ENSG00000146352.8	2	0.987887	0.548063	0.616498	0.513364	0.663631	0.639335	0.140015	0.369116	0.129341	0.039906
CLYBL	ENSG00000125246.11	4	0.975302	3.81503	2.97583	4.47725	2.37175	1.57221	0.642118	1.38501	1.52337	1.07217
CMAS	ENSG00000111726.8	5	0.947805	10.9171	8.6237	9.47464	10.0421	9.24409	10.7576	17.3073	21.9136	25.4894
CMC1	ENSG00000187118.8	5	0.983047	2.8499	2.42902	2.80601	2.59575	2.31679	2.4754	4.43514	5.53841	5.34385
CMC2	ENSG00000103121.4	3	0.927382	5.95526	4.18074	5.33184	12.0325	12.9967	14.8939	12.9288	12.6557	15.0257
CMIP	ENSG00000153815.12	5	0.594019	18.6655	16.7742	16.7532	11.7866	9.27582	8.04538	14.0392	17.2666	19.2271
CMPK2	ENSG00000134326.7	5	0.903891	3.78886	2.86479	3.98749	4.2032	2.40661	1.44147	5.37013	8.45637	5.75531
CMSS1	ENSG00000184220.6	3	0.963429	4.14779	2.88468	4.45805	17.0284	26.1864	33.2223	27.4689	29.0452	33.3548
CMTM3	ENSG00000140931.15	5	0.945793	22.2939	20.7941	22.3419	16.7543	13.5209	12.2493	29.7146	34.7294	30.8638
CMTM4	ENSG00000183723.8	1	0.750401	1.70814	1.67104	1.75368	2.24254	3.32507	2.43924	2.37991	2.86244	2.4323
CMTM6	ENSG00000091317.7	3	0.900384	17.097	12.4877	15.3264	18.7546	17.5833	20.5768	30.8605	26.3509	32.1956
CMTM7	ENSG00000153551.9	4	0.856598	31.0446	25.4943	30.606	14.7734	8.30635	7.78365	15.4629	21.5375	20.0949
CMTM8	ENSG00000170293.4	5	0.576255	9.99864	8.93762	16.4295	6.26303	6.7616	7.87597	9.06851	12.2314	17.1172
CMTR1	ENSG00000137200.8	3	0.895677	20.854	18.9895	21.3845	24.6018	22.2573	25.2213	28.6266	32.0443	36.6391
CMTR2	ENSG00000180917.12	1	0.899378	10.9608	7.78587	10.698	13.5058	14.6706	19.214	14.1497	11.7051	15.4097
CNBP	ENSG00000169714.12	3	0.913544	152.068	123.024	126.146	263.095	337.174	381.702	349.142	300.78	345.73
CNDP2	ENSG00000133313.10	3	0.954727	11.0289	11.3384	12.5569	17.3406	21.9705	19.4097	25.4803	28.5719	26.002
CNGA2	ENSG00000183862.5	2	0.823931	0.660318	2.07699	1.27799	0.980846	1.99573	0.336906	0.373968	0.456963	0.0248803
CNGB1	ENSG00000070729.9	2	0.965878	1.98602	2.89583	2.1479	3.38539	3.17117	0.532561	1.65127	0.7884	0.0875692
CNIH1	ENSG00000100528.7	1	0.981493	20.154	16.5143	18.3562	33.0133	39.7731	46.1341	29.8655	27.1193	35.2135
CNN2	ENSG00000064666.10	4	0.60165	91.6224	113.41	99.3457	30.7265	11.4939	7.03632	73.0948	96.3478	87.3127
CNN3	ENSG00000117519.11	5	0.829873	6.64492	6.90537	9.08082	6.65618	6.97987	7.24739	7.54367	12.279	13.6959
CNNM1	ENSG00000119946.9	1	0.687984	1.14069	1.11738	1.43161	2.2092	2.92434	1.62205	2.0808	1.75211	1.39086
CNNM3	ENSG00000168763.11	4	0.838559	31.763	32.5503	34.2941	18.8433	10.7855	7.56741	20.2034	24.3578	24.8608
CNNM4	ENSG00000158158.7	3	0.916883	5.4329	5.03833	4.8612	5.76168	5.80316	5.83922	7.19179	7.38628	7.59639
CNOT1	ENSG00000125107.12	3	0.98999	74.8006	64.1453	74.7903	99.8068	108.361	123.722	128.696	140.441	158.445
CNOT10	ENSG00000182973.14	3	0.945782	10.8455	8.62094	10.6757	14.2108	14.8446	15.1402	20.629	23.3255	23.3016
CNOT11	ENSG00000158435.3	3	0.951704	32.4551	25.9044	30.4141	38.9121	40.4243	48.737	64.5488	64.2567	76.0281
CNOT3	ENSG00000088038.13	3	0.979205	22.6084	22.7502	25.2924	34.0624	38.4638	45.975	43.6205	42.1387	49.8324
CNOT6L	ENSG00000138767.8	4	0.99084	60.7513	48.769	55.8855	32.155	12.0233	10.1019	14.9659	15.1877	17.7952
CNOT7	ENSG00000198791.7	3	0.889865	21.8543	18.9926	21.8926	25.6962	27.9005	34.3391	29.2549	27.1169	34.0202
CNP	ENSG00000173786.12	5	0.951141	6.58632	7.31761	6.46514	7.23287	8.47153	7.40315	14.4794	16.7878	16.9156
CNPPD1	ENSG00000115649.11	5	0.956711	34.8565	33.4737	39.0319	28.5574	24.0876	25.9454	55.0509	52	59.3465
CNPY2	ENSG00000257727.1	1	0.969538	5.58248	5.05031	5.07194	7.1589	8.45909	9.57102	7.83885	6.37826	7.21566
CNPY3	ENSG00000137161.12	3	0.973914	70.1853	74.7938	72.2169	88.6159	90.2006	99.8554	116.731	107.964	117.187
CNPY4	ENSG00000166997.3	4	0.982106	14.194	15.2002	15.008	7.8256	4.08933	1.15732	5.58622	5.87882	4.8859
CNTF	ENSG00000242689.1	3	0.579964	1.12753	1.67357	2.00969	2.61493	1.63098	1.86514	2.682	1.83781	2.71051
CNTN2	ENSG00000184144.5	2	0.968027	1.19899	1.52425	1.23742	1.44196	1.901	0.399064	0.9564	0.438589	0.0314968
CNTN3	ENSG00000113805.8	2	0.971722	0.815812	0.851567	0.97269	1.33388	1.28184	0.29508	0.405456	0.201293	0.0414038
CNTN4	ENSG00000144619.10	2	0.962335	0.931664	1.00911	0.977897	1.48301	1.09769	0.32474	0.638449	0.321234	0.0501993
CNTNAP2	ENSG00000174469.13	2	0.979578	0.924217	1.17516	1.17665	1.23524	1.38617	0.273003	0.747751	0.273438	0.112866
CNTROB	ENSG00000170037.9	5	0.874278	8.05036	9.01786	9.30916	10.2556	9.23185	9.82633	14.7597	12.6353	15.3373
COA1	ENSG00000106603.13	3	0.749102	9.75106	6.64702	8.40145	11.1441	9.15872	10.4203	10.1891	10.7952	11.5549
COA3	ENSG00000183978.7	3	0.943809	13.985	12.5164	14.6808	19.5012	23.9031	22.2762	35.6918	37.9307	40.2263
COA4	ENSG00000181924.6	3	0.989642	17.3076	17.3956	20.2883	39.165	49.9225	60.6337	56.8606	62.0518	75.6593
COA6	ENSG00000168275.10	3	0.985598	6.42863	6.3115	5.89665	13.3397	16.5772	22.0278	22.8414	21.9687	30.9361
COASY	ENSG00000068120.10	5	0.943234	12.5524	11.552	12.7638	14.6556	14.8643	17.2368	35.5569	39.8841	45.8442
COBL	ENSG00000106078.13	2	0.975821	0.921731	1.06753	1.05403	1.43555	1.43595	0.305644	0.693779	0.399425	0.061618
COBLL1	ENSG00000082438.11	2	0.986992	0.59923	0.640697	0.666922	0.709996	0.687468	0.152137	0.389856	0.170754	0.0431045
COG2	ENSG00000135775.9	1	0.918305	8.4708	7.53343	8.14476	13.54	15.3324	16.4999	13.7882	13.0423	15.85
COG4	ENSG00000103051.14	5	0.758907	18.5016	16.0597	17.8805	12.2156	6.96617	5.37591	17.9369	21.257	20.0586
COG6	ENSG00000133103.12	5	0.602672	5.43055	4.5774	5.10538	4.04293	2.81004	2.1846	4.68515	4.6411	5.65768
COG7	ENSG00000168434.8	5	0.974274	10.3804	9.13372	10.531	9.49745	8.49925	7.4979	15.2852	15.155	18.7926
COIL	ENSG00000121058.4	1	0.971526	13.1662	11.881	13.0373	21.988	29.6042	34.3307	24.2777	22.1998	25.0395
COL11A1	ENSG00000060718.14	2	0.982472	0.895378	0.970219	1.14139	1.21511	1.34463	0.249285	0.582866	0.248859	0.0725156
COL12A1	ENSG00000111799.16	2	0.976136	1.10451	1.14189	1.22197	1.19309	1.51114	0.298065	0.791571	0.302247	0.059343
COL16A1	ENSG00000084636.13	2	0.961881	2.02548	2.70541	2.53629	3.14055	3.7296	0.627816	1.70782	1.02086	0.199523
COL17A1	ENSG00000065618.12	2	0.982078	2.01202	2.42938	2.17583	2.87452	3.21181	0.680351	1.48435	0.723137	0.1207
COL18A1	ENSG00000182871.10	4	0.85481	27.1197	10.8673	16.6777	14.6835	6.18056	3.90817	3.97258	1.84079	1.6873
COL1A1	ENSG00000108821.9	2	0.965957	1.50734	2.42394	1.76709	2.12778	2.43544	0.803502	1.11371	0.709881	0.193888
COL1A2	ENSG00000164692.13	2	0.986063	0.953512	1.01747	0.9895	1.0132	1.05891	0.306443	0.6221	0.297172	0.0569094
COL20A1	ENSG00000101203.12	2	0.965145	1.45721	2.1766	1.93417	2.2797	2.80301	0.522029	1.14574	0.732351	0.0738904
COL22A1	ENSG00000169436.12	2	0.97406	2.27046	2.58209	2.6355	3.51573	3.53565	0.924177	1.83959	0.86102	0.175601
COL24A1	ENSG00000171502.10	2	0.983871	1.06682	1.11448	1.17962	1.29329	1.57634	0.393908	0.704885	0.314491	0.128965
COL27A1	ENSG00000196739.10	3	0.871046	1.5993	1.84177	1.69805	2.78851	3.93699	2.47884	3.20287	4.4058	4.39054
COL28A1	ENSG00000215018.5	2	0.956477	1.3108	1.4177	1.38705	1.28698	1.39418	0.174618	0.909765	0.402817	0.095875
COL2A1	ENSG00000139219.13	2	0.985017	2.50179	2.88409	2.78377	3.24905	3.85112	0.74662	1.6798	0.970131	0.133624
COL4A1	ENSG00000187498.10	2	0.963439	1.84657	1.85191	1.65741	2.77759	2.26746	0.48485	1.22315	0.594766	0.165602
COL4A4	ENSG00000081052.10	2	0.955986	0.997177	1.21559	1.12361	1.84864	1.67467	0.391047	0.778961	0.365687	0.0748219
COL4A5	ENSG00000188153.8	2	0.894936	0.554872	1.10319	0.98321	0.697808	1.20371	0.287549	0.374894	0.31385	0.0242083
COL5A1	ENSG00000130635.11	2	0.970189	1.95429	2.23449	2.10834	2.64532	3.2289	0.584014	1.47286	0.813813	0.104007
COL5A2	ENSG00000204262.7	5	0.557794	1.20055	1.03713	1.37713	1.39089	1.46982	0.596902	2.06671	1.09647	1.77361
COL5A3	ENSG00000080573.6	2	0.976452	2.59593	3.07105	2.90744	3.8657	4.20426	0.722142	1.9555	1.01571	0.229813
COL6A2	ENSG00000142173.10	4	0.859651	12.1922	11.4038	10.6967	11.8703	5.93222	2.73373	6.43094	2.95605	1.56443
COL6A3	ENSG00000163359.11	2	0.985946	1.65579	1.83447	1.5752	1.90084	1.73434	0.366187	0.964754	0.471651	0.105996
COL6A6	ENSG00000206384.6	2	0.980078	1.16235	1.46371	1.03847	1.41877	1.39669	0.309784	0.777078	0.375687	0.0833118
COL7A1	ENSG00000114270.11	2	0.969721	2.36643	3.33646	2.76171	3.36934	3.99738	0.871503	2.03208	1.10094	0.229283
COL9A1	ENSG00000112280.11	2	0.993072	1.35704	1.30074	1.23673	1.58246	1.61105	0.439875	0.795757	0.414071	0.0696845
COL9A3	ENSG00000092758.11	2	0.944218	2.13048	2.91361	2.38859	4.0463	4.3133	0.572111	1.66529	0.954004	0.138657
COLGALT1	ENSG00000130309.6	3	0.982293	21.8555	21.9361	24.4606	33.4152	47.7907	51.4315	68.751	62.9016	70.3812
COMMD1	ENSG00000173163.6	3	0.975879	5.45262	4.18723	5.52266	8.40846	9.99534	9.64546	11.4523	12.7662	15.5356
COMMD10	ENSG00000145781.4	1	0.890707	10.8743	7.09738	10.4602	13.6832	14.8598	17.009	14.0377	11.4391	15.4815
COMMD2	ENSG00000114744.4	5	0.831188	9.73662	6.99723	8.97106	8.78204	7.6733	8.62315	11.3431	10.1887	11.9988
COMMD4	ENSG00000140365.11	5	0.993258	3.75497	4.32604	4.45571	4.22007	3.05897	1.74168	7.90009	9.88012	9.73671
COMMD5	ENSG00000170619.8	5	0.954336	6.87154	7.27265	7.67291	7.61364	8.01589	7.60087	11.0126	13.1328	12.7254
COMMD7	ENSG00000149600.7	5	0.932324	17.8088	16.5398	19.4925	12.5619	11.4433	9.85984	25.4479	25.6925	25.6366
COMMD8	ENSG00000169019.9	5	0.934601	8.73707	5.58977	7.25935	8.25753	9.19631	8.21714	17.3187	16.9535	19.0429
COMMD9	ENSG00000110442.7	5	0.986439	12.6438	10.7873	13.1134	12.7601	9.43682	10.939	25.0457	29.127	30.3998
COMP	ENSG00000105664.6	2	0.960946	2.55183	2.88943	3.23328	2.95038	4.28914	0.794308	1.6317	0.946086	0.193336
COMT	ENSG00000093010.7	5	0.93097	8.79263	7.14313	7.6527	9.35519	9.9513	8.76389	19.3901	19.3855	18.3097
COMTD1	ENSG00000165644.6	5	0.929576	4.19921	3.99539	6.02392	4.76718	6.65696	5.69312	13.1106	26.3973	23.2507
COPA	ENSG00000122218.10	3	0.985895	44.8918	40.5318	45.6822	67.1361	66.7932	79.7406	94.8327	97.2766	104.533
COPB1	ENSG00000129083.8	3	0.956833	26.0604	21.9461	25.2636	41.7322	35.1963	48.4892	52.5678	46.0619	61.2623
COPB2	ENSG00000184432.5	3	0.946803	12.7014	10.5264	11.8251	14.9246	16.5762	18.3629	23.7482	25.9875	30.0255
COPE	ENSG00000105669.8	3	0.964047	18.28	15.9969	17.8967	25.0201	27.1024	31.2486	43.5485	43.9115	48.05
COPG1	ENSG00000181789.10	3	0.965865	36.7322	34.4468	40.1432	55.9337	67.2577	77.5994	98.1449	116.042	118.416
COPG2	ENSG00000158623.10	5	0.965112	4.35493	3.52608	3.95624	4.00117	3.82178	2.50198	10.4313	8.999	10.7637
COPRS	ENSG00000172301.6	3	0.980465	4.81141	4.76575	5.52895	32.4985	50.029	67.7983	56.2477	65.4857	79.4723
COPS2	ENSG00000166200.10	3	0.910154	15.7724	12.9342	14.9019	27.445	35.0506	43.1314	32.8636	32.2833	40.2511
COPS3	ENSG00000141030.8	3	0.995872	14.5897	14.4786	14.8104	35.8867	49.3813	56.5585	59.3989	64.7968	73.0462
COPS4	ENSG00000138663.4	3	0.979125	8.11013	6.79394	7.84178	12.3967	14.9702	14.3739	20.534	17.9658	21.0287
COPS6	ENSG00000168090.5	3	0.975734	22.6971	19.3893	21.2446	34.3084	47.9341	54.6024	68.734	78.2138	89.8528
COPS7A	ENSG00000111652.5	5	0.950763	14.3453	15.2363	18.1011	18.2332	18.0412	19.2098	35.7319	40.7321	45.3348
COPS7B	ENSG00000144524.13	3	0.965492	13.1806	11.7484	15.0338	17.2679	18.0232	17.7473	21.4523	20.6669	22.7226
COPS8	ENSG00000198612.6	5	0.921212	13.8092	10.7016	12.8038	13.2716	10.7741	12.3962	17.2971	16.9125	20.181
COPZ1	ENSG00000111481.5	3	0.985003	26.6892	26.3509	28.2201	46.7075	51.7117	59.3081	57.0405	60.0386	66.2812
COQ10B	ENSG00000115520.4	1	0.920963	16.3122	13.8835	12.9963	22.6641	24.0229	27.4153	18.2466	14.4968	16.8894
COQ2	ENSG00000173085.9	3	0.921846	4.7222	4.21307	4.4938	6.62653	7.04672	7.97078	13.8582	14.2937	16.6745
COQ3	ENSG00000132423.6	5	0.927683	4.02552	3.74461	4.21719	5.47358	4.83201	5.7559	13.9103	12.9576	17.4584
COQ4	ENSG00000167113.6	3	0.921498	13.4818	12.5462	13.9272	18.6638	16.8607	18.5914	27.6094	26.0943	26.4672
COQ5	ENSG00000110871.10	5	0.94569	7.48455	7.10046	8.4462	8.88509	7.35448	6.83174	16.2107	13.9343	15.5386
COQ6	ENSG00000119723.11	4	0.753772	5.8812	5.15774	6.11355	4.73704	3.35606	2.04558	4.7799	5.15304	4.9385
COQ9	ENSG00000088682.9	5	0.939089	8.87199	8.66091	8.88254	9.18665	10.0512	10.6571	17.0792	18.8156	20.5548
CORO1A	ENSG00000102879.11	5	0.977835	102.314	99.5803	109.82	69.0507	31.2693	37.181	190.263	234.079	233.651
CORO1B	ENSG00000172725.9	5	0.925604	5.23363	6.83494	5.12546	4.15299	4.42795	1.41005	33.3374	80.9814	51.5124
CORO1C	ENSG00000110880.6	3	0.870276	2.50026	2.71645	2.47579	3.66525	6.86625	7.58552	8.47394	15.4234	20.4721
CORO2A	ENSG00000106789.8	4	0.914533	7.70711	7.37129	7.52854	4.34461	2.42989	0.747145	3.44641	5.28998	4.00839
CORO6	ENSG00000167549.14	5	0.883279	1.94886	2.29012	2.57305	4.89741	4.20237	3.70989	6.93454	10.0754	13.8541
CORO7	ENSG00000262246.1	5	0.892832	3.37612	3.95829	3.66876	3.44682	2.93402	2.20028	4.79931	4.85591	4.53472
COTL1	ENSG00000103187.6	3	0.947505	22.0285	19.3339	21.0009	74.8788	88.6592	123.051	233.567	243.021	263.322
COX10	ENSG00000006695.6	3	0.99498	17.2696	14.2806	17.1802	24.7351	31.8138	38.1168	41.4004	41.5475	49.3486
COX14	ENSG00000178449.4	5	0.86497	16.3304	13.8336	15.8566	11.2817	10.7272	11.7552	15.1301	20.6597	22.2112
COX15	ENSG00000014919.8	5	0.969186	16.2098	13.1933	15.3051	13.417	8.78951	9.90124	21.3594	23.9277	26.7644
COX16	ENSG00000133983.10	3	0.949475	11.5515	8.88328	9.67518	15.8833	15.1263	19.529	28.0045	22.4487	27.8182
COX18	ENSG00000163626.12	5	0.747544	13.8896	10.9972	12.7196	10.7338	5.87806	5.15169	13.5591	14.6722	14.2407
COX4I1	ENSG00000131143.4	5	0.854142	31.1346	34.1086	29.6697	35.8149	28.6166	31.0196	40.6945	37.7236	43.7014
COX5A	ENSG00000178741.7	3	0.929553	19.7732	17.2911	20.5348	39.6549	56.7511	70.2319	139.776	152.06	164.084
COX5B	ENSG00000135940.2	5	0.944327	31.5215	29.9551	33.4926	30.8643	30.0227	35.5008	70.84	75.544	100.579
COX6A1	ENSG00000111775.2	3	0.992659	10.8225	9.07656	9.21247	16.7461	20.0077	24.3035	28.8541	26.0446	32.1338
COX6A1P2	ENSG00000226976.1	3	0.940233	35.4545	36.4534	39.5327	89.5113	133.113	158.149	256.477	333.264	346.626
COX6B1	ENSG00000126267.4	5	0.928079	129.863	113.105	120.223	168.032	151.066	199.988	410.404	441.24	477.756
COX6C	ENSG00000164919.6	3	0.921849	10.2928	9.48783	9.28544	12.5758	12.2981	12.3254	18.0534	16.6469	17.6622
COX7A2	ENSG00000112695.7	3	0.98122	22.5265	19.3073	20.2902	37.6961	49.6648	56.0565	76.9479	80.4788	83.6077
COX7A2L	ENSG00000115944.10	3	0.976883	12.5201	13.1499	12.7883	16.8618	18.9955	20.3967	21.1346	22.5953	27.4369
COX7B	ENSG00000131174.4	3	0.980108	8.52297	6.88324	6.71264	13.2249	13.7486	18.5787	23.7843	21.7527	25.5088
COX7C	ENSG00000127184.6	5	0.919993	50.3622	50.4651	41.6281	55.8796	51.6296	55.0428	95.4776	89.824	106.916
COX8A	ENSG00000176340.3	5	0.94855	43.7888	46.1028	45.686	56.4185	64.5853	70.0754	209.229	310.273	269.735
CPAMD8	ENSG00000160111.8	2	0.986689	1.93491	2.30017	2.19676	2.9189	2.88952	0.645458	1.332	0.731982	0.117529
CPB1	ENSG00000153002.7	2	0.966787	0.67118	1.10691	0.827071	1.03772	1.04394	0.40533	0.422356	0.227079	0.0309095
CPD	ENSG00000108582.7	1	0.906662	10.6564	9.79547	10.1354	48.2042	56.9056	65.4256	19.6932	13.3154	14.6879
CPE	ENSG00000109472.9	2	0.984369	1.49532	1.52849	1.62306	1.54601	1.61017	0.339771	0.68401	0.34767	0.0595933
CPEB3	ENSG00000107864.10	4	0.941949	2.86589	2.50681	3.22191	1.97622	1.3448	0.483744	1.69631	1.78023	1.60759
CPM	ENSG00000135678.7	5	0.953609	1.27563	1.1095	1.07311	1.68983	2.69959	1.65395	7.46743	9.22026	10.2187
CPNE1	ENSG00000214078.7	5	0.734913	42.7662	54.7592	57.872	41.9512	64.4367	79.7376	61.3256	117.213	164.727
CPNE3	ENSG00000085719.7	5	0.896574	23.8952	20.4852	24.1574	18.7337	11.9066	11.6086	29.5271	29.638	31.9852
CPNE7	ENSG00000178773.10	3	0.88801	2.40001	3.16263	3.15027	4.64816	7.32479	5.75393	9.49885	14.271	11.8906
CPNE8	ENSG00000139117.9	5	0.76381	1.47846	1.20267	1.59412	2.23392	1.68635	1.02872	3.16321	2.11116	2.62134
CPOX	ENSG00000080819.2	5	0.958974	8.37616	6.32938	7.03051	8.73202	6.902	7.15538	23.719	21.6628	26.254
CPPED1	ENSG00000103381.7	5	0.937233	1.55809	1.85392	1.51669	1.78167	1.66353	0.686462	4.42703	5.78256	3.86375
CPQ	ENSG00000104324.11	4	0.96193	6.88952	6.41592	8.1134	4.64294	3.04252	1.70075	1.68616	1.32216	1.25439
CPSF1	ENSG00000071894.10	3	0.929853	26.442	27.0643	23.7514	31.5663	33.9707	36.8318	49.541	54.2908	54.1612
CPSF2	ENSG00000165934.8	3	0.88898	20.4634	14.8607	18.7398	24.5857	20.7561	27.1195	44.1299	39.6034	52.3748
CPSF3	ENSG00000119203.9	5	0.939279	10.7426	10.0494	10.6598	14.7742	14.5062	16.2263	34.1269	41.6364	45.788
CPSF3L	ENSG00000127054.14	3	0.992684	18.761	17.7048	20.5447	30.7948	36.9625	44.2732	43.4444	46.3836	50.2839
CPSF4	ENSG00000160917.10	3	0.973825	9.84705	9.99597	10.3254	18.3767	21.8999	24.9487	25.0618	22.737	26.7028
CPSF6	ENSG00000111605.12	3	0.940329	46.0086	37.4449	44.1877	51.7058	52.539	62.9724	56.3614	60.9162	65.5387
CPSF7	ENSG00000149532.11	3	0.897789	51.4973	48.8258	57.5982	83.0091	95.4183	113.286	89.5127	90.0813	106.065
CPT1A	ENSG00000110090.8	4	0.604198	17.4398	6.61405	9.01942	11.5005	4.56457	3.23022	10.4493	8.01817	6.55702
CPT2	ENSG00000157184.5	5	0.949001	10.9796	9.1051	11.3427	8.06778	5.48503	4.18152	14.2354	20.0917	17.2182
CPXM2	ENSG00000121898.8	2	0.990948	1.79591	1.91027	1.85019	2.37127	2.45474	0.428681	1.13012	0.568617	0.0977436
CR1	ENSG00000203710.6	4	0.826191	2.48246	1.48677	5.13098	1.1942	1.00336	0.355285	0.554451	0.294343	0.0521701
CR2	ENSG00000117322.12	4	0.815185	7.40039	5.02936	13.9835	4.18513	2.29531	2.55118	2.88945	2.26898	3.89
CRABP1	ENSG00000166426.7	2	0.94388	2.14151	2.14771	2.12055	1.62541	2.09844	0.354245	0.921756	0.613723	0.0710078
CRADD	ENSG00000169372.8	1	0.850241	3.06347	2.77308	2.8759	4.65537	6.14944	5.21795	3.3911	2.50305	3.25675
CRAT	ENSG00000095321.12	4	0.803223	7.40341	6.95377	8.2833	5.61164	3.31364	1.61208	5.26961	7.15111	4.51469
CRB1	ENSG00000134376.10	2	0.977719	0.69658	0.705125	0.696208	0.981369	0.80499	0.176917	0.435062	0.239041	0.043172
CRB2	ENSG00000148204.7	2	0.982669	1.94264	2.2573	1.83076	2.6128	2.75065	0.546133	1.32025	0.7919	0.0943993
CRBN	ENSG00000113851.9	4	0.97252	22.7882	21.294	24.8111	15.3599	9.05963	8.29234	7.1827	6.22147	7.25484
CRCP	ENSG00000241258.2	3	0.981698	11.0522	10.1945	11.9411	16.2252	23.0447	23.3415	27.2506	26.3876	27.0079
CREB3	ENSG00000107175.6	5	0.900804	9.16316	9.68277	8.67512	9.04693	6.72633	5.14932	15.8217	12.0692	15.8399
CREB3L2	ENSG00000182158.10	3	0.929222	7.84016	7.41631	9.45987	10.4382	9.24744	12.7632	13.5071	15.0398	15.8585
CREB5	ENSG00000146592.12	2	0.809045	1.0128	1.04496	0.97403	2.23518	1.76795	1.07615	0.680888	0.30996	0.151
CREBL2	ENSG00000111269.2	4	0.97886	39.7978	34.1489	34.9627	18.7019	8.55139	7.63648	13.5113	13.237	15.1557
CREBRF	ENSG00000164463.8	4	0.966815	21.2842	18.9256	22.1477	14.0568	5.69444	3.68632	2.94815	1.94506	1.90608
CRELD1	ENSG00000163703.13	2	0.621183	21.0964	17.522	21.4249	29.573	21.7994	27.7597	12.3814	7.5513	7.57739
CRELD2	ENSG00000184164.10	1	0.760296	2.88203	3.60057	3.50612	6.70125	6.47421	5.33169	6.93928	4.96303	5.1808
CREM	ENSG00000095794.15	1	0.951167	3.8087	4.53872	4.21511	26.7667	40.8579	40.2899	26.3159	29.9564	27.6224
CRHR1	ENSG00000120088.10	2	0.972521	1.32266	1.85251	2.03232	2.13954	2.07498	0.404173	0.981559	0.490156	0.10397
CRIM1	ENSG00000150938.5	1	0.938454	1.57653	1.67691	1.7858	17.5131	18.5858	31.8927	8.17103	5.93639	8.66286
CRIP1	ENSG00000213145.5	4	0.893513	2.49877	3.84482	2.60989	1.5516	1.15797	0.343777	0.736663	0.628433	0.255371
CRIP2	ENSG00000182809.6	2	0.9344	3.11779	3.25046	2.33725	2.48821	2.50686	0.520316	1.05745	0.607345	0.197121
CRISPLD2	ENSG00000103196.7	2	0.968507	1.46344	1.58551	1.19525	2.01565	1.64484	0.580585	0.792513	0.583559	0.115112
CRKL	ENSG00000099942.8	3	0.975879	39.0402	36.7821	39.0693	44.6573	48.0759	57.9339	60.4593	55.8284	64.8103
CRLS1	ENSG00000088766.7	3	0.926312	6.06673	4.57512	5.55248	13.6423	16.5193	21.8134	17.9688	15.1364	21.1007
CRMP1	ENSG00000072832.10	2	0.973304	1.67989	2.44655	1.96721	2.61783	2.86279	0.560946	1.3816	0.745693	0.102927
CROT	ENSG00000005469.7	4	0.61823	4.76642	4.02634	3.82318	3.36774	2.25198	1.45337	3.87017	3.80968	4.14936
CRTAC1	ENSG00000095713.9	2	0.988515	2.26444	2.51258	2.40925	2.48867	2.83825	0.540804	1.44617	0.722735	0.10983
CRTAM	ENSG00000109943.4	2	0.548288	8.363	3.28472	3.9359	18.7046	5.74957	6.03025	4.70033	1.36694	1.37068
CRTAP	ENSG00000170275.10	4	0.83157	11.2441	11.353	11.4233	5.58502	3.49775	1.29852	6.5551	8.66465	7.70405
CRTC2	ENSG00000160741.12	5	0.567681	60.852	58.5718	65.3399	44.8093	30.2459	33.7658	53.0553	57.2814	67.563
CRX	ENSG00000105392.11	2	0.955038	1.60061	2.02341	1.29193	1.7582	2.33788	0.500614	1.17311	0.48786	0.0780479
CRY1	ENSG00000008405.7	1	0.959155	10.1663	10.6339	10.749	22.5676	23.5423	30.9534	15.6741	14.274	16.2765
CRYL1	ENSG00000165475.9	4	0.974021	13.09	11.9653	13.3445	7.68876	3.94427	1.51241	6.75693	6.35901	4.84486
CS	ENSG00000062485.14	3	0.979007	29.8816	31.2739	33.694	62.356	81.4178	100.065	122.7	138.738	167.625
CSDE1	ENSG00000009307.11	3	0.901674	131.309	119.993	123.789	143.937	171.901	204.283	173.133	165.964	207.942
CSE1L	ENSG00000124207.12	3	0.978276	33.5587	30.4504	36.3497	69.6217	106.736	122.474	165.635	184.527	215.431
CSF1	ENSG00000184371.9	1	0.98297	1.50717	2.15708	1.78779	25.785	36.8482	50.2428	27.3145	16.106	19.0007
CSF1R	ENSG00000182578.9	2	0.874819	4.75588	3.17976	2.38737	3.02898	3.33259	0.643883	1.71148	0.946499	0.171109
CSF2	ENSG00000164400.4	1	0.983998	1.19498	1.08949	1.18328	13.9713	20.7831	28.3671	9.59786	8.41562	11.7968
CSF3R	ENSG00000119535.13	2	0.978134	1.50416	1.98435	1.48944	1.89425	2.01373	0.441331	1.12631	0.6193	0.133892
CSGALNACT1	ENSG00000147408.10	4	0.927646	47.5204	31.504	33.0385	27.7999	8.45988	6.56027	5.16149	1.5282	2.48609
CSK	ENSG00000103653.12	5	0.925496	59.6654	53.3262	59.4314	71.5464	78.2179	93.6127	223.052	214.597	257.961
CSMD1	ENSG00000183117.13	2	0.9887	1.0553	1.14047	1.13956	1.41935	1.42738	0.362783	0.757386	0.387002	0.0716419
CSMD2	ENSG00000121904.13	2	0.973485	1.67338	1.77223	1.70341	2.28284	2.51525	0.476297	1.26627	0.659062	0.104909
CSMD3	ENSG00000164796.13	2	0.988442	0.583147	0.750745	0.65525	0.693211	0.767103	0.21257	0.398189	0.164824	0.0411401
CSNK1A1	ENSG00000113712.12	1	0.927582	19.8953	17.6424	19.4015	27.1504	28.3877	30.1539	27.3488	25.0189	28.5899
CSNK1E	ENSG00000213923.6	1	0.939493	18.3607	16.3254	18.1935	30.6792	42.7182	44.5735	25.5863	35.0302	32.4135
CSNK1G1	ENSG00000169118.11	3	0.980026	9.47256	8.44554	9.69016	12.1277	13.4794	15.3671	17.9779	15.3461	18.8344
CSNK2A1	ENSG00000101266.12	3	0.94414	17.0242	14.4109	18.12	38.6122	54.2412	68.4708	55.1056	52.4289	67.8437
CSNK2A2	ENSG00000070770.4	3	0.986821	21.952	20.5948	22.1885	28.1666	34.5604	38.0257	38.267	36.4123	43.1744
CSNK2A3	ENSG00000254598.2	3	0.974632	11.5337	11.6875	11.8372	26.4699	39.8027	52.275	50.1471	43.4959	58.0867
CSNK2B	ENSG00000204435.9	3	0.927748	8.29438	10.1507	8.52909	13.6964	16.9155	18.1614	34.18	32.2713	35.5439
CSPG4	ENSG00000173546.7	2	0.967331	1.2005	1.57442	1.35131	1.69818	2.15449	0.436448	0.86004	0.560541	0.0467804
CSPP1	ENSG00000104218.9	1	0.820531	7.27813	6.48547	8.17821	12.4596	12.9542	13.9367	8.56623	6.00837	6.70575
CSRNP1	ENSG00000144655.10	1	0.986793	14.2121	12.1033	11.8978	80.2941	109.415	114.811	78.9758	57.7737	60.1118
CSRNP3	ENSG00000178662.11	2	0.98169	0.568652	0.753607	0.56979	0.627999	0.726529	0.143977	0.322054	0.160663	0.0336701
CSRP1	ENSG00000159176.9	5	0.913965	5.18544	4.71264	4.70203	5.2925	4.01983	3.21442	13.9227	11.2001	10.4625
CSRP2BP	ENSG00000149474.9	3	0.90543	10.5851	10.5555	10.6598	10.9053	12.2778	11.9867	14.4714	15.5278	16.4293
CST3	ENSG00000101439.4	2	0.928973	4.24625	3.5431	3.09465	3.36614	3.17017	1.42488	1.69301	1.06479	0.535026
CST7	ENSG00000077984.4	3	0.758443	3.56707	4.40294	5.34352	6.26714	10.5628	7.29466	7.45918	20.56	15.8839
CSTB	ENSG00000160213.5	5	0.916311	18.0029	21.9606	27.6364	20.2744	19.8054	22.1997	31.1292	48.384	54.3556
CSTF1	ENSG00000101138.7	3	0.956229	24.95	21.6712	24.211	36.4401	45.9341	50.8609	42.6915	55.316	55.8339
CSTF2	ENSG00000101811.9	3	0.980963	11.1516	10.6287	12.648	36.3092	48.2062	60.7885	87.2774	92.7528	95.1289
CSTF2T	ENSG00000177613.7	1	0.979097	28.4019	23.4807	24.1472	36.2907	41.1974	45.0912	33.9175	31.072	31.7805
CSTF3	ENSG00000176102.7	1	0.928484	5.49874	4.5137	5.89244	12.0894	16.783	18.3676	13.4379	14.0315	15.4228
CSTL1	ENSG00000125823.8	2	0.969464	2.40512	2.65328	3.17543	3.04247	2.89917	0.47363	1.0443	0.789785	0.232599
CT64	ENSG00000241369.1	2	0.961943	0.939289	1.16366	1.09423	0.873676	1.28907	0.293777	0.547608	0.272154	0.0229005
CTA-211A9.5	ENSG00000244625.1	4	0.888682	15.3271	11.0567	11.4494	11.1495	6.13413	5.15406	5.58391	3.144	2.95962
CTA-217C2.2	ENSG00000273243.1	1	0.896715	6.29415	3.78741	7.1229	14.218	14.0553	13.1739	10.2866	7.24741	8.04985
CTA-223H9.9	ENSG00000273424.1	4	0.963282	7.50538	7.14108	7.43191	5.27461	3.14292	1.70539	2.17981	2.06819	1.03692
CTA-250D10.23	ENSG00000260655.1	4	0.626429	6.70703	12.5824	17.502	8.15166	5.43076	10.5818	2.01097	3.03866	2.9761
CTA-384D8.36	ENSG00000272821.1	5	0.959358	11.242	12.0727	12.4126	12.0606	9.63251	11.2259	21.9177	30.9614	25.5241
CTA-929C8.6	ENSG00000226741.1	2	0.987899	1.06074	1.09758	1.16706	1.47317	1.33559	0.258621	0.610279	0.339274	0.0628065
CTA-989H11.1	ENSG00000273366.1	3	0.825651	2.19429	2.20064	4.21781	3.53775	6.92628	6.93922	9.13769	5.25966	6.90128
CTB-113D17.1	ENSG00000272568.1	2	0.950957	0.692115	0.850294	1.01088	1.40449	1.17069	0.23511	0.519369	0.1937	0.0430293
CTB-114C7.4	ENSG00000250274.1	1	0.941006	0.896609	0.664628	0.501819	10.9722	11.0049	12.6206	10.9065	6.65077	7.83632
CTB-119C2.1	ENSG00000273237.1	2	0.614917	8.30744	5.37319	8.52417	13.7073	11.0954	11.8784	4.87535	1.91389	2.22061
CTB-129O4.1	ENSG00000248367.1	4	0.898134	15.5837	9.98504	18.003	11.4082	8.07951	3.1967	5.39351	2.5199	1.88387
CTB-133G6.1	ENSG00000263264.1	4	0.975162	65.2971	75.8345	85.5258	28.0285	6.49621	2.77387	5.65842	6.94309	6.83384
CTB-25B13.12	ENSG00000267317.1	4	0.926728	9.96131	10.3376	9.69226	3.46985	3.43554	3.53095	2.89436	2.52118	1.83098
CTB-36H16.2	ENSG00000260686.1	4	0.94022	2.61666	2.54589	3.09379	1.81148	1.00229	1.13056	0.641434	0.629573	0.550359
CTB-55O6.4	ENSG00000267670.1	2	0.91771	6.73262	11.0339	7.96754	6.40488	9.19473	0.679083	3.16199	2.50006	0.136121
CTB-58E17.1	ENSG00000261005.1	1	0.860066	3.77884	4.12416	4.21875	13.5518	15.2556	17.1155	3.98651	4.09757	4.7908
CTB-60B18.18	ENSG00000268287.1	2	0.950003	1.99139	2.42512	1.54935	1.94931	2.32303	0.168067	0.402792	0.573249	0.0589555
CTB-92J24.2	ENSG00000269397.1	5	0.986517	1.41768	1.36491	1.40381	0.717346	0.66151	0.23451	4.49623	4.62149	5.05327
CTBP1	ENSG00000159692.11	5	0.925898	24.9252	22.7934	25.88	24.3234	26.0023	27.2988	36.5525	36.9959	38.8311
CTBP1-AS2	ENSG00000196810.4	5	0.683825	8.36469	8.63979	10.7493	6.52446	5.90029	5.69995	7.80515	10.2578	11.1672
CTC-1337H24.1	ENSG00000269913.1	2	0.943268	3.43295	3.63416	2.45509	2.61365	3.33721	0.338019	1.29616	0.597812	0.158096
CTC-205M6.5	ENSG00000260841.1	4	0.913453	3.93903	4.86206	4.60965	3.16511	2.7313	1.12286	1.59124	0.999101	1.16452
CTC-228N24.3	ENSG00000245937.3	5	0.937617	6.0927	4.94897	5.82458	6.18689	5.95604	6.14935	8.31715	8.99197	9.80104
CTC-260E6.6	ENSG00000267383.2	5	0.790722	1.24682	1.5283	1.96624	1.31436	1.88541	0.395579	2.36685	2.54342	2.14365
CTC-264O10.1	ENSG00000253469.1	2	0.91436	0.810104	2.16653	2.00544	2.13496	1.73253	0.239296	0.688198	0.120918	0
CTC-273B12.10	ENSG00000269814.1	4	0.901083	7.11964	4.69752	5.9368	4.93768	3.27841	1.10687	2.65275	1.17456	0.698895
CTC-281F24.1	ENSG00000261996.1	4	0.807912	16.1606	16.8867	34.5921	9.89514	6.77314	7.60356	4.1104	7.49651	11.2705
CTC-297N7.8	ENSG00000273290.1	3	0.914419	9.29338	9.17539	9.32162	12.6393	13.116	14.6788	13.4036	12.6245	14.4095
CTC-325H20.2	ENSG00000266912.1	2	0.852443	5.11128	5.43211	4.00368	4.10142	3.38171	1.84784	1.16654	1.22979	1.13829
CTC-338M12.2	ENSG00000248473.1	1	0.958589	2.89745	4.15119	3.4839	8.72684	10.8642	11.1264	6.91547	5.56047	5.14677
CTC-378H22.1	ENSG00000254887.1	2	0.622482	7.49143	9.51026	11.4558	18.8933	18.8055	16.5266	6.06873	3.18472	3.2229
CTC-430J12.2	ENSG00000249722.1	2	0.950237	2.43902	2.2932	1.35852	2.41044	2.31173	0.630403	0.690665	0.477821	0
CTC-435M10.10	ENSG00000268987.1	2	0.903885	4.41057	4.10737	3.5875	3.4871	3.4913	2.23343	1.42737	0.705355	0.457014
CTC-435M10.6	ENSG00000268475.1	4	0.900019	6.18175	6.69561	8.08004	4.95261	4.32673	1.46082	2.66077	0.885795	0.922379
CTC-444N24.11	ENSG00000268205.1	1	0.722594	13.744	10.0774	10.0093	19.1635	22.3947	21.4085	11.0309	6.95946	8.30464
CTC-457E21.2	ENSG00000269364.1	2	0.923698	1.6143	1.49443	1.59849	1.04722	1.59342	0.440165	0.492288	0.222419	0
CTC-459I6.1	ENSG00000251450.1	4	0.879467	2.26148	2.04854	1.87816	1.53805	1.3616	0.344783	0.908941	0.489998	0.0907085
CTC-461F20.1	ENSG00000250415.1	4	0.956983	8.69941	7.63401	8.7339	4.07583	3.38272	2.56971	1.57386	1.78543	1.75275
CTC-471J1.2	ENSG00000260160.1	2	0.606036	3.78049	2.27485	3.74348	3.58673	5.58608	4.83909	1.35601	0.620713	0.887913
CTC-479C5.12	ENSG00000261884.2	1	0.90502	3.15705	2.80605	3.70397	5.25234	4.59042	5.8517	4.34709	3.79887	4.73793
CTC-487M23.5	ENSG00000270067.1	3	0.86837	2.79722	2.93283	4.02886	7.37183	13.4972	14.7977	14.1137	10.9884	11.2248
CTC-498M16.2	ENSG00000250156.3	2	0.915269	0.84023	0.693956	0.783064	0.625229	0.864844	0.437991	0.279918	0.11066	0
CTC-503J8.6	ENSG00000267427.1	3	0.97608	23.7022	21.7831	26.2337	49.0767	78.5602	94.4587	81.71	90.1788	107.493
CTC-523E23.1	ENSG00000261754.2	4	0.969006	3.05442	3.58927	3.78829	1.366	0.827787	0.291634	0.541672	0.442094	0.268539
CTC-523E23.11	ENSG00000271109.1	4	0.978479	67.483	63.2204	85.2287	24.3872	5.65661	2.44696	2.40297	3.48322	2.80536
CTC-523E23.4	ENSG00000267767.2	4	0.959894	4.57963	4.74346	6.35615	3.20527	1.70778	0.554414	0.892896	0.521079	0.404519
CTC-523E23.5	ENSG00000269086.2	2	0.980095	1.19594	1.27436	1.18423	1.70722	1.49683	0.25023	0.804309	0.373752	0.0619602
CTC-524C5.2	ENSG00000263272.1	1	0.956767	1.79953	1.67269	1.86884	3.56267	4.30084	5.60086	2.88347	2.16193	2.71055
CTC-524C5.5	ENSG00000262099.1	1	0.728208	2.35093	0.428678	0.634887	3.37946	4.98625	2.90402	1.69456	1.33982	0.974395
CTC-529P8.1	ENSG00000250072.1	2	0.978601	1.20304	1.10763	1.07409	1.4969	1.67946	0.302934	0.524965	0.379744	0.0408711
CTC-534A2.2	ENSG00000253251.2	1	0.853621	3.59473	3.38796	4.88902	5.98093	6.16376	8.0342	6.13211	5.91507	7.32393
CTC-550B14.6	ENSG00000267149.2	1	0.77352	1.33849	1.07389	0.927771	1.76374	3.35699	2.29317	1.554	2.54727	1.96942
CTC-558O2.2	ENSG00000254192.1	2	0.954409	1.26016	1.36912	1.4558	1.88193	2.20503	0.372238	0.29737	0.329166	0.130575
CTC-559E9.5	ENSG00000267481.1	4	0.942851	30.2931	26.4906	31.7342	20.2508	10.7738	11.349	5.91058	5.74853	5.66536
CTCF	ENSG00000102974.10	5	0.931032	50.7676	48.5542	52.7186	46.3248	43.0958	47.9504	70.2391	63.5499	74.1092
CTD-2012K14.2	ENSG00000261396.1	4	0.947578	12.6789	14.6471	15.4154	9.13602	6.17825	2.27557	2.81772	1.72479	1.79603
CTD-2017D11.1	ENSG00000268362.1	4	0.973501	14.0539	15.4962	19.2214	9.61755	4.34767	3.69265	4.59532	4.95455	4.68248
CTD-2031P19.3	ENSG00000227908.3	2	0.883847	3.04718	2.64605	2.61259	2.8205	1.73397	0.504936	1.07334	0.632324	0.415856
CTD-2033C11.1	ENSG00000269961.1	4	0.924991	10.7375	5.21601	9.1372	4.42151	3.13141	1.68498	1.80533	1.50253	1.66889
CTD-2035E11.3	ENSG00000251131.1	4	0.946059	7.53704	6.47901	8.07252	6.3238	3.05036	1.36308	1.9165	1.44642	1.14755
CTD-2035E11.4	ENSG00000272382.1	4	0.876356	4.16059	2.5963	3.57055	3.70369	1.1864	0.710084	1.15198	0.455414	0.383211
CTD-2035E11.5	ENSG00000272144.1	4	0.922621	6.58065	3.82945	4.90729	3.59701	2.3693	0.335974	0.966238	0.58207	0.404073
CTD-2044J15.1	ENSG00000248677.1	2	0.977202	1.34014	1.52153	1.47725	1.46604	1.41584	0.253949	0.758982	0.407613	0.052401
CTD-2050B12.2	ENSG00000261439.1	2	0.972449	1.07163	1.20908	1.14957	0.98847	1.40636	0.263791	0.581627	0.219938	0.0555203
CTD-2054N24.2	ENSG00000259363.1	5	0.860609	3.86641	2.90819	5.66308	3.31161	1.5974	2.85523	6.52355	6.20392	11.2176
[truncated: 7,681 more rows]
