# Supplementary material for: Dynamic chromatin architecture identifies new autoimmune-associated enhancers for IL2 and novel genes regulating CD4+ T cell activation
Source: eLife. 2024 Sep 20;13:RP96852. doi: 10.7554/eLife.96852 (PMC11418197; doi:10.7554/eLife.96852)
Supplement: Supplementary file 2. [file elife-96852-supp2.xlsx]

## Sheet: Tcellactivation_GSVA_analysis
Table S2: Pathway enrichment of differentally expressed RNA-seq genes
Pathway	logFC	AveExpr	t	P.Value	adj.P.Val	B	comp
HALLMARK_E2F_TARGETS	1.21275	-0.0987592	-9.9126	1.23476e-06	6.17379e-05	5.88755	hr24 - hr8
HALLMARK_G2M_CHECKPOINT	1.09291	-0.0903192	-9.16058	2.60073e-06	6.50182e-05	5.11604	hr24 - hr8
HALLMARK_FATTY_ACID_METABOLISM	0.703585	-0.0382391	-7.91146	1.0049e-05	0.000167483	3.70761	hr24 - hr8
HALLMARK_CHOLESTEROL_HOMEOSTASIS	0.685748	-0.0493816	-7.14722	2.49039e-05	0.000311299	2.75781	hr24 - hr8
HALLMARK_PEROXISOME	0.603691	-0.0452148	-5.96593	0.000116423	0.00094404	1.14088	hr24 - hr8
HALLMARK_DNA_REPAIR	1.0401	-0.0647354	-5.88236	0.000130752	0.00094404	1.01921	hr24 - hr8
HALLMARK_MITOTIC_SPINDLE	0.54593	-0.0491982	-5.82303	0.000142064	0.00094404	0.932239	hr24 - hr8
HALLMARK_ADIPOGENESIS	0.746082	-0.0381096	-5.7469	0.000158136	0.00094404	0.819914	hr24 - hr8
HALLMARK_OXIDATIVE_PHOSPHORYLATION	1.18663	-0.0557157	-5.69615	0.000169927	0.00094404	0.744563	hr24 - hr8
HALLMARK_MTORC1_SIGNALING	1.10725	-0.0618351	-5.61205	0.000191582	0.000957912	0.618906	hr24 - hr8
HALLMARK_MYC_TARGETS_V2	1.30296	-0.0530587	-5.40196	0.000259643	0.00118019	0.300612	hr24 - hr8
HALLMARK_MYC_TARGETS_V1	1.37736	-0.0630182	-5.2456	0.000326886	0.00127012	0.0596639	hr24 - hr8
HALLMARK_GLYCOLYSIS	0.584589	-0.0331813	-5.23874	0.00033023	0.00127012	0.049018	hr24 - hr8
HALLMARK_UNFOLDED_PROTEIN_RESPONSE	1.04541	-0.0613053	-5.00599	0.000468397	0.00156649	-0.316249	hr24 - hr8
HALLMARK_IL2_STAT5_SIGNALING	0.510191	-0.0282511	-5.00381	0.000469948	0.00156649	-0.3197	hr24 - hr8
HALLMARK_UV_RESPONSE_UP	0.601846	-0.0344777	-4.66735	0.000789693	0.00223643	-0.860947	hr24 - hr8
HALLMARK_REACTIVE_OXYGEN_SPECIES_PATHWAY	0.732561	-0.0287677	-4.66256	0.000795639	0.00223643	-0.868759	hr24 - hr8
HALLMARK_PI3K_AKT_MTOR_SIGNALING	0.751476	-0.0335805	-4.65501	0.000805113	0.00223643	-0.881082	hr24 - hr8
HALLMARK_NOTCH_SIGNALING	0.385797	-0.0461763	-4.34374	0.0013206	0.00347526	-1.39541	hr24 - hr8
HALLMARK_TNFA_SIGNALING_VIA_NFKB	0.454748	-0.0142878	-4.2848	0.0014525	0.00363125	-1.49413	hr24 - hr8
HALLMARK_HEDGEHOG_SIGNALING	-0.49061	0.00658815	4.25195	0.00153194	0.00364749	-1.54931	hr24 - hr8
HALLMARK_INTERFERON_GAMMA_RESPONSE	0.534556	-0.0207487	-3.94079	0.00255466	0.00580604	-2.07783	hr24 - hr8
HALLMARK_KRAS_SIGNALING_UP	-0.318612	0.0131363	3.67308	0.00400373	0.00870377	-2.53969	hr24 - hr8
HALLMARK_E2F_TARGETS	-1.09107	-0.0987592	8.91805	3.34183e-06	0.000105815	4.91244	hr8 - hr0
HALLMARK_FATTY_ACID_METABOLISM	-0.761644	-0.0382391	8.56431	4.86477e-06	0.000105815	4.52527	hr8 - hr0
HALLMARK_MITOTIC_SPINDLE	-0.780042	-0.0491982	8.32013	6.34891e-06	0.000105815	4.25014	hr8 - hr0
HALLMARK_G2M_CHECKPOINT	-0.896714	-0.0903192	7.51611	1.5938e-05	0.000199225	3.29592	hr8 - hr0
HALLMARK_PEROXISOME	-0.608473	-0.0452148	6.01319	0.000109074	0.00109074	1.29241	hr8 - hr0
HALLMARK_CHOLESTEROL_HOMEOSTASIS	-0.531268	-0.0493816	5.53714	0.00021336	0.001778	0.592725	hr8 - hr0
HALLMARK_ADIPOGENESIS	-0.585386	-0.0381096	4.50909	0.00101364	0.00686977	-1.02765	hr8 - hr0
HALLMARK_DNA_REPAIR	-0.788285	-0.0647354	4.45821	0.00109916	0.00686977	-1.11154	hr8 - hr0
HALLMARK_OXIDATIVE_PHOSPHORYLATION	-0.911413	-0.0557157	4.37503	0.00125576	0.00697642	-1.24937	hr8 - hr0
HALLMARK_PI3K_AKT_MTOR_SIGNALING	-0.587373	-0.0335805	3.63848	0.00424559	0.0192306	-2.50225	hr8 - hr0
HALLMARK_REACTIVE_OXYGEN_SPECIES_PATHWAY	-0.549278	-0.0287677	3.49601	0.00541199	0.0192306	-2.74973	hr8 - hr0
HALLMARK_NOTCH_SIGNALING	-0.309359	-0.0461763	3.48312	0.00553271	0.0192306	-2.77218	hr8 - hr0
HALLMARK_TNFA_SIGNALING_VIA_NFKB	0.369542	-0.0142878	-3.48195	0.00554375	0.0192306	-2.77421	hr8 - hr0
HALLMARK_MTORC1_SIGNALING	-0.656282	-0.0618351	3.32635	0.00724344	0.0226357	-3.04565	hr8 - hr0
HALLMARK_GLYCOLYSIS	-0.342493	-0.0331813	3.06922	0.0113115	0.0307871	-3.49505	hr8 - hr0
HALLMARK_KRAS_SIGNALING_UP	0.260639	0.0131363	-3.00475	0.0126561	0.0307871	-3.60761	hr8 - hr0
HALLMARK_MYC_TARGETS_V1	-0.77874	-0.0630182	2.96578	0.0135463	0.0307871	-3.67559	hr8 - hr0
HALLMARK_HEDGEHOG_SIGNALING	0.313026	0.00658815	-2.71289	0.021073	0.0439022	-4.11448	hr8 - hr0
HALLMARK_MYC_TARGETS_V2	-0.587701	-0.0530587	2.43656	0.0341252	0.0609379	-4.58617	hr8 - hr0
HALLMARK_UNFOLDED_PROTEIN_RESPONSE	-0.414853	-0.0613053	1.98655	0.0738668	0.111919	-5.3206	hr8 - hr0
HALLMARK_UV_RESPONSE_UP	-0.24724	-0.0344777	1.91736	0.0829638	0.122006	-5.42809	hr8 - hr0
HALLMARK_IL2_STAT5_SIGNALING	-0.11388	-0.0282511	1.1169	0.289099	0.35256	-6.49984	hr8 - hr0
HALLMARK_INTERFERON_GAMMA_RESPONSE	-0.0826728	-0.0207487	0.60947	0.555254	0.603537	-6.94255	hr8 - hr0
