# Supplementary material for: Dynamic chromatin architecture identifies new autoimmune-associated enhancers for IL2 and novel genes regulating CD4+ T cell activation
Source: eLife. 2024 Sep 20;13:RP96852. doi: 10.7554/eLife.96852 (PMC11418197; doi:10.7554/eLife.96852)
Supplement: Supplementary file 3. [file elife-96852-supp3.xlsx]

## Sheet: Cluster 1
Table S3: Pathway enrichment of differential RNA-seq genes by cluster
Pathway	observed	expected	pathway_size	p.val	p.adjust	Score	genes
REACTOME_METABOLISM_OF_RNA	122	54	672	1.30349e-19	1.95393e-16	15.7091	LAS1L:GCFC2:UTP18:NSUN2:METTL1:TRIT1:GEMIN8:NOP58:RIOK2:DDX20:WDR3:TRMT11:PSME4:TRNT1:EXOSC7:THOC1:DIMT1:XRN2:TRMT6:FUS:PUS7:TFIP11:PSMA6:RNMT:GSPT1:TRMT1:RPL18A:RBM28:PSMA2:UTP6:KRR1:HBS1L:NCBP2:RRP9:SRSF7:PNO1:PRPF3:NSUN4:HEATR1:RCL1:ETF1:UTP20:RPL21:SRSF6:MPHOSPH10:RPS10:RIOK1:RPP40:THOC2:HNRNPH2:LSM7:SNRPA1:UTP3:NIP7:NXT1:RBM17:WDR36:HNRNPA1:LTV1:TRA2B:TEX10:TGS1:ALKBH8:WDR12:PELP1:ZNF473:RPL…
REACTOME_RRNA_PROCESSING	52	17	205	4.09294e-15	2.62183e-12	11.5814	LAS1L:UTP18:NOP58:RIOK2:WDR3:EXOSC7:DIMT1:XRN2:RPL18A:RBM28:UTP6:KRR1:RRP9:PNO1:NSUN4:HEATR1:RCL1:UTP20:RPL21:MPHOSPH10:RPS10:RIOK1:RPP40:UTP3:NIP7:WDR36:LTV1:TEX10:WDR12:PELP1:RPL7:RPP38:RRP1:RPL26:NOL9:RPL9:WDR43:UTP15:RPL36AL:DDX21:TSR1:TRMT10C:RPS26:DDX47:CSNK1E:EXOSC6:WDR46:RPL41:RPL36A:PWP2:BOP1:RPL17
REACTOME_RRNA_PROCESSING_IN_THE_NUCLEUS_AND_CYTOSOL	50	16	193	5.24717e-15	2.62183e-12	11.5814	LAS1L:UTP18:NOP58:RIOK2:WDR3:EXOSC7:DIMT1:XRN2:RPL18A:RBM28:UTP6:KRR1:RRP9:PNO1:HEATR1:RCL1:UTP20:RPL21:MPHOSPH10:RPS10:RIOK1:RPP40:UTP3:NIP7:WDR36:LTV1:TEX10:WDR12:PELP1:RPL7:RPP38:RRP1:RPL26:NOL9:RPL9:WDR43:UTP15:RPL36AL:DDX21:TSR1:RPS26:DDX47:CSNK1E:EXOSC6:WDR46:RPL41:RPL36A:PWP2:BOP1:RPL17
REACTOME_UNFOLDED_PROTEIN_RESPONSE_UPR	26	8	91	8.94229e-10	3.35112e-07	6.47481	NFYA:HSPA5:HERPUD1:PDIA5:ASNS:EXOSC7:DNAJB11:XBP1:ARFGAP1:DNAJC3:GOSR2:ATF6:DNAJB9:SEC31A:PDIA6:SRPRB:HYOU1:CEBPG:TATDN2:LMNA:SYVN1:ATF3:HSP90B1:DDIT3:TSPYL2:EXOSC6
REACTOME_RRNA_MODIFICATION_IN_THE_NUCLEUS_AND_CYTOSOL	19	5	60	1.51069e-08	4.52906e-06	5.34399	UTP18:NOP58:WDR3:DIMT1:UTP6:KRR1:RRP9:PNO1:HEATR1:RCL1:UTP20:MPHOSPH10:UTP3:WDR36:WDR43:UTP15:DDX47:WDR46:PWP2
REACTOME_CYTOKINE_SIGNALING_IN_IMMUNE_SYSTEM	110	68	856	7.38967e-08	1.84619e-05	4.73372	FYN:BIRC3:CD44:TNFRSF1B:MAP2K3:CUL3:TNFRSF9:TAB2:MAP2K4:PSME4:NEDD4:MARK3:IL4R:APBB1IP:HIF1A:PSMA6:NFKBIA:CD40LG:IL21R:PPP2CB:RELB:STX1A:PSMA2:TNFSF8:MAP3K8:LAMTOR3:NFKB1:IL2:CCND1:IL23A:IFNG:SOD2:VEGFA:SKP1:BCL6:KPNA1:CCL20:IL18R1:IL18RAP:RHOU:GBP1:FASLG:IFIT3:EGR1:SOCS2:DUSP4:TNFRSF8:ATF1:CDKN1A:MT2A:IRF1:TNFSF14:STAT5A:SMARCA4:TRAF3:SNRPA1:IRAK2:IL2RA:IL15RA:IL10:IL1RN:MYC:IRF4:DUSP5:IL21:DUSP…
REACTOME_IRE1ALPHA_ACTIVATES_CHAPERONES	16	4	50	1.31381e-07	2.81344e-05	4.55076	HSPA5:PDIA5:DNAJB11:XBP1:ARFGAP1:DNAJC3:GOSR2:DNAJB9:SEC31A:PDIA6:SRPRB:HYOU1:TATDN2:LMNA:SYVN1:TSPYL2
REACTOME_CYTOSOLIC_TRNA_AMINOACYLATION	10	2	24	6.90091e-07	0.000129306	3.88838	SARS:GARS:CARS:TARS:LARS:NARS:YARS:AIMP1:MARS:IARS
REACTOME_ATF6_ATF6_ALPHA_ACTIVATES_CHAPERONE_GENES	6	1	10	1.85386e-06	0.00030877	3.51036	NFYA:HSPA5:XBP1:ATF6:HSP90B1:DDIT3
REACTOME_TRIF_TICAM1_MEDIATED_TLR4_SIGNALING	21	8	97	5.09863e-06	0.000764284	3.11675	BIRC3:MAP2K3:TAB2:MAP2K4:UBE2D1:NFKBIA:PPP2CB:MAP3K8:NFKB1:UBE2D3:SKP1:DUSP4:ATF1:TRAF3:IRAK2:TANK:DUSP6:APP:UBC:FOS:RELA
REACTOME_TRANSLATION	45	24	295	6.22076e-06	0.00084772	3.07175	SARS:EIF5:GSPT1:EIF3J:RPL18A:GARS:MRPL32:SEC61B:EIF3A:CARS:MTRF1L:TARS:EIF2B4:ETF1:RPL21:RPS10:MRPS25:PTCD3:SEC61G:LARS:NARS:YARS:SRPRB:RPL7:EIF4E:SRP19:EEF1A1:EIF4A2:EIF5B:EIF4A1:RPL26:RPL9:RPN1:AIMP1:RPL36AL:SEC11C:MARS:EIF1AX:IARS:RPS26:RPL41:MRPS17:RPL36A:MARS2:RPL17
REACTOME_ATF6_ATF6_ALPHA_ACTIVATES_CHAPERONES	6	1	12	1.06162e-05	0.00122413	2.91217	NFYA:HSPA5:XBP1:ATF6:HSP90B1:DDIT3
REACTOME_GENE_EXPRESSION_TRANSCRIPTION	160	118	1486	1.01768e-05	0.00122413	2.91217	NFYA:ZNF195:TEAD3:JARID2:NFIX:MAMLD1:SNAPC1:FAS:POU2F2:PRDM1:POLR3E:POLR1A:PSME4:UBE2D1:ZNF37A:THOC1:MAPKAPK5:SETD1A:POLR3H:PSMA6:RNMT:INTS6:INTS10:TNFRSF10A:PPP2CB:ELL:CDK6:PSMA2:RHEB:GCK:TFAM:LAMTOR3:UBE2D3:IL2:FBXW7:CCND1:IFNG:CHD4:PRKAB1:SOD2:VEGFA:SKP1:BCL6:NCBP2:GLS:SRSF7:GADD45A:KDM5B:FASLG:CD3EAP:MYB:SGK1:ELL2:NR4A3:TNFRSF10B:BCL2L14:NR4A1:AGO2:SRSF6:CDKN1A:POLR1B:THOC2:NR1D1:HIVEP3:SMARC…
REACTOME_ATF4_ACTIVATES_GENES_IN_RESPONSE_TO_ENDOPLASMIC_RETICULUM_STRESS	9	3	26	1.51628e-05	0.00144835	2.83913	NFYA:HERPUD1:ASNS:EXOSC7:ATF6:CEBPG:ATF3:DDIT3:EXOSC6
REACTOME_PERK_REGULATES_GENE_EXPRESSION	10	3	31	1.39615e-05	0.00144835	2.83913	NFYA:HSPA5:HERPUD1:ASNS:EXOSC7:ATF6:CEBPG:ATF3:DDIT3:EXOSC6
REACTOME_INTERLEUKIN_4_AND_INTERLEUKIN_13_SIGNALING	22	9	111	1.54593e-05	0.00144835	2.83913	TNFRSF1B:IL4R:HIF1A:CCND1:IL23A:VEGFA:BCL6:RHOU:FASLG:CDKN1A:IL10:MYC:IRF4:IL2RG:BATF:HSP90B1:FOS:JUNB:BCL2:SOCS3:SOCS1:TNF
REACTOME_TRNA_MODIFICATION_IN_THE_NUCLEUS_AND_CYTOSOL	12	4	43	1.71786e-05	0.00151475	2.81966	NSUN2:METTL1:TRIT1:TRMT11:TRMT6:PUS7:TRMT1:ALKBH8:TRMT44:TRMT61A:ADAT2:TYW1
REACTOME_INTERFERON_GAMMA_SIGNALING	19	8	93	3.1152e-05	0.00259427	2.58599	CD44:IFNG:GBP1:MT2A:IRF1:IRF4:IRF8:CAMK2D:GBP5:IFNGR2:GBP2:GBP4:PRKCD:B2M:PTPN2:GBP6:SOCS3:SOCS1:IRF9
REACTOME_DEATH_RECEPTOR_SIGNALLING	25	12	141	3.85057e-05	0.0030379	2.51743	CFLAR:BIRC3:FAS:NSMAF:TRIO:TAB2:NFKBIA:TNFRSF10A:NFKB1:PRDM4:USP4:ARHGEF2:FASLG:TNFAIP3:TNFRSF10B:SMPD2:SPPL2A:UBC:ADAM17:BCL2L11:TIAM1:ARHGEF3:RELA:HDAC2:TNF
REACTOME_TOLL_LIKE_RECEPTOR_4_TLR4_CASCADE	23	11	127	5.02669e-05	0.00376751	2.42395	BIRC3:MAP2K3:TAB2:MAP2K4:UBE2D1:NFKBIA:PPP2CB:MAP3K8:NFKB1:UBE2D3:SKP1:DUSP4:ATF1:TRAF3:IRAK2:TANK:DUSP6:APP:UBC:FOS:RELA:SOCS1:PELI1
REACTOME_COPII_MEDIATED_VESICLE_TRANSPORT	15	6	68	6.07194e-05	0.00433421	2.36309	CD59:TMED2:CNIH1:GOSR2:PPP6R3:SEC24A:TBC1D20:NAPG:SEC31A:SEC16A:TMED10:MCFD2:F5:ANKRD28:SEC22B
REACTOME_TRNA_AMINOACYLATION	11	4	42	6.73423e-05	0.00447328	2.34937	SARS:GARS:CARS:TARS:LARS:NARS:YARS:AIMP1:MARS:IARS:MARS2
REACTOME_THE_NLRP3_INFLAMMASOME	6	2	15	6.97583e-05	0.00447328	2.34937	P2RX7:NFKB1:PANX1:APP:NLRP3:RELA
REACTOME_INFLAMMASOMES	7	2	20	7.98414e-05	0.00447328	2.34937	P2RX7:NFKB1:PANX1:APP:NLRP3:BCL2:RELA
REACTOME_REGULATION_BY_C_FLIP	5	1	11	7.92736e-05	0.00447328	2.34937	CFLAR:FAS:TNFRSF10A:FASLG:TNFRSF10B
REACTOME_REGULATED_NECROSIS	7	2	20	7.98414e-05	0.00447328	2.34937	CFLAR:BIRC3:FAS:TNFRSF10A:FASLG:TNFRSF10B:UBC
REACTOME_MYD88_CASCADE_INITIATED_ON_PLASMA_MEMBRANE	17	7	84	8.05728e-05	0.00447328	2.34937	MAP2K3:TAB2:MAP2K4:NFKBIA:PPP2CB:MAP3K8:NFKB1:SKP1:DUSP4:ATF1:IRAK2:DUSP6:APP:UBC:FOS:RELA:PELI1
REACTOME_INTERFERON_SIGNALING	31	17	202	0.000116684	0.00624679	2.20434	CD44:NEDD4:IFNG:KPNA1:GBP1:IFIT3:EGR1:MT2A:IRF1:IRF4:IRF8:CAMK2D:UBC:EIF4E:RANBP2:GBP5:EIF4A2:IFNGR2:EIF4A1:GBP2:GBP4:PRKCD:B2M:PDE12:PTPN2:KPNA2:GBP6:SOCS3:SOCS1:KPNA4:IRF9
REACTOME_SIGNALING_BY_INTERLEUKINS	75	50	631	0.000125704	0.00649759	2.18725	FYN:TNFRSF1B:MAP2K3:CUL3:TAB2:MAP2K4:PSME4:MARK3:IL4R:APBB1IP:HIF1A:PSMA6:NFKBIA:IL21R:PPP2CB:STX1A:PSMA2:MAP3K8:LAMTOR3:NFKB1:IL2:CCND1:IL23A:IFNG:SOD2:VEGFA:SKP1:BCL6:CCL20:IL18R1:IL18RAP:RHOU:FASLG:SOCS2:DUSP4:ATF1:CDKN1A:STAT5A:SMARCA4:SNRPA1:IRAK2:IL2RA:IL15RA:IL10:IL1RN:MYC:IRF4:DUSP5:IL21:DUSP6:KSR1:APP:CAMK2D:IL2RG:UBC:HNRNPDL:BATF:DUSP2:PEA15:IL3:CSF2:HSP90B1:CXCL10:FOS:JUNB:BCL2:RELA:PT…
REACTOME_ASPARAGINE_N_LINKED_GLYCOSYLATION	42	25	304	0.000131225	0.00655686	2.1833	SEL1L:DERL2:CD59:TMED2:NANS:CNIH1:ARFGAP1:MAGT1:GOSR2:GOSR1:PPP6R3:MAN1A1:SEC24A:UAP1:ALG2:ALG5:TBC1D20:NAPG:TMED7:COG2:NPL:KDELR2:UGGT1:SEC31A:PMM2:SEC16A:UBC:NUS1:B4GALT5:GNE:SYVN1:RPN1:PDIA3:MGAT2:ARF4:TMED10:MCFD2:TMED9:F5:ANKRD28:ARFGAP3:SEC22B
REACTOME_TOLL_LIKE_RECEPTOR_CASCADES	25	13	153	0.000158166	0.00742574	2.12926	BIRC3:MAP2K3:TAB2:MAP2K4:UBE2D1:NFKBIA:PPP2CB:MAP3K8:NFKB1:UBE2D3:UNC93B1:SKP1:DUSP4:ATF1:TRAF3:IRAK2:TANK:DUSP6:APP:UBC:HSP90B1:FOS:RELA:SOCS1:PELI1
REACTOME_CARGO_CONCENTRATION_IN_THE_ER	9	3	33	0.000158521	0.00742574	2.12926	CD59:TMED2:CNIH1:GOSR2:SEC24A:TMED10:MCFD2:F5:SEC22B
REACTOME_RNA_POLYMERASE_II_TRANSCRIBES_SNRNA_GENES	16	7	81	0.00016523	0.00750545	2.12462	SNAPC1:POU2F2:INTS6:INTS10:ELL:NCBP2:ELL2:CCNT1:RPRD1A:ZC3H8:PHAX:SNAPC4:ZNF143:NABP1:TAF13:TAF9
REACTOME_TOLL_LIKE_RECEPTOR_TLR1:TLR2_CASCADE	18	8	97	0.000183121	0.00784774	2.10526	MAP2K3:TAB2:MAP2K4:NFKBIA:PPP2CB:MAP3K8:NFKB1:SKP1:DUSP4:ATF1:IRAK2:DUSP6:APP:UBC:FOS:RELA:SOCS1:PELI1
REACTOME_TFAP2_AP_2_FAMILY_REGULATES_TRANSCRIPTION_OF_CELL_CYCLE_FACTORS	3	1	5	0.000183236	0.00784774	2.10526	KDM5B:CDKN1A:MYC
REACTOME_RNA_POLYMERASE_III_TRANSCRIPTION_INITIATION_FROM_TYPE_3_PROMOTER	8	3	28	0.000204861	0.00853018	2.06904	SNAPC1:POLR3E:POLR3H:BDP1:SNAPC4:ZNF143:POLR3D:POLR1C
REACTOME_NUCLEOTIDE_BINDING_DOMAIN_LEUCINE_RICH_REPEAT_CONTAINING_RECEPTOR_NLR_SIGNALING_PATHWAYS	12	5	54	0.000230058	0.00932046	2.03056	BIRC3:TAB2:P2RX7:NFKB1:PANX1:TNFAIP3:IRAK2:APP:UBC:NLRP3:BCL2:RELA
REACTOME_CIRCADIAN_CLOCK	14	6	70	0.000310773	0.0122592	1.91154	CRY1:CREM:HIF1A:NAMPT:SKP1:NR1D1:PER2:CLOCK:TGS1:SIK1:UBC:NFIL3:NRIP1:CSNK1E
REACTOME_REGULATION_OF_IFNG_SIGNALING	5	2	14	0.000418686	0.0145956	1.83578	IFNG:IFNGR2:PTPN2:SOCS3:SOCS1
REACTOME_TOLL_LIKE_RECEPTOR_9_TLR9_CASCADE	17	8	95	0.000411478	0.0145956	1.83578	MAP2K3:TAB2:MAP2K4:NFKBIA:PPP2CB:MAP3K8:NFKB1:SKP1:DUSP4:ATF1:IRAK2:DUSP6:APP:UBC:FOS:RELA:PELI1
REACTOME_RESPONSE_TO_METAL_IONS	5	2	14	0.000418686	0.0145956	1.83578	MT1G:MT2A:MT1E:MT1X:MTF1
REACTOME_TRNA_PROCESSING	19	9	111	0.000402334	0.0145956	1.83578	NSUN2:METTL1:TRIT1:TRMT11:TRNT1:TRMT6:PUS7:TRMT1:RPP40:ALKBH8:RPP38:RANBP2:TSEN2:TRMT44:TRMT61A:TRMT10C:XPOT:ADAT2:TYW1
REACTOME_TNF_SIGNALING	10	4	43	0.000393091	0.0145956	1.83578	BIRC3:NSMAF:TAB2:USP4:TNFAIP3:SMPD2:SPPL2A:UBC:ADAM17:TNF
REACTOME_EUKARYOTIC_TRANSLATION_INITIATION	20	10	120	0.000438688	0.0149453	1.82549	EIF5:EIF3J:RPL18A:EIF3A:EIF2B4:RPL21:RPS10:RPL7:EIF4E:EIF4A2:EIF5B:EIF4A1:RPL26:RPL9:RPL36AL:EIF1AX:RPS26:RPL41:RPL36A:RPL17
REACTOME_TNFR1_MEDIATED_CERAMIDE_PRODUCTION	3	1	6	0.000515119	0.0171592	1.7655	NSMAF:SMPD2:TNF
REACTOME_CAMK_IV_MEDIATED_PHOSPHORYLATION_OF_CREB	4	1	10	0.000554359	0.0173122	1.76165	CAMKK1:CAMKK2:CAMK2D:KPNA2
REACTOME_RUNX1_AND_FOXP3_CONTROL_THE_DEVELOPMENT_OF_REGULATORY_T_LYMPHOCYTES_TREGS	4	1	10	0.000554359	0.0173122	1.76165	IL2:IFNG:IL2RA:TNFRSF18
REACTOME_INTERLEUKIN_21_SIGNALING	4	1	10	0.000554359	0.0173122	1.76165	IL21R:STAT5A:IL21:IL2RG
REACTOME_TNFR2_NON_CANONICAL_NF_KB_PATHWAY	17	8	100	0.000780115	0.0238651	1.62224	BIRC3:TNFRSF1B:TNFRSF9:PSME4:PSMA6:CD40LG:RELB:PSMA2:TNFSF8:SKP1:TNFRSF8:TNFSF14:TRAF3:UBC:TNFRSF4:TNFRSF18:TNF
REACTOME_CASPASE_ACTIVATION_VIA_DEATH_RECEPTORS_IN_THE_PRESENCE_OF_LIGAND	5	2	16	0.00097275	0.0275123	1.56047	CFLAR:FAS:TNFRSF10A:FASLG:TNFRSF10B
REACTOME_METALLOTHIONEINS_BIND_METALS	4	1	11	0.000950263	0.0275123	1.56047	MT1G:MT2A:MT1E:MT1X
REACTOME_MAP3K8_TPL2_DEPENDENT_MAPK1_3_ACTIVATION	5	2	16	0.00097275	0.0275123	1.56047	MAP2K4:MAP3K8:NFKB1:SKP1:UBC
REACTOME_FOXO_MEDIATED_TRANSCRIPTION_OF_CELL_DEATH_GENES	5	2	16	0.00097275	0.0275123	1.56047	NFYA:BCL6:FASLG:BCL2L11:DDIT3
REACTOME_ER_TO_GOLGI_ANTEROGRADE_TRANSPORT	23	13	154	0.00101452	0.0276504	1.5583	CD59:TMED2:CNIH1:ARFGAP1:GOSR2:GOSR1:PPP6R3:SEC24A:TBC1D20:NAPG:TMED7:COG2:KDELR2:SEC31A:SEC16A:ARF4:TMED10:MCFD2:TMED9:F5:ANKRD28:ARFGAP3:SEC22B
REACTOME_NEGATIVE_REGULATORS_OF_DDX58_IFIH1_SIGNALING	8	3	34	0.0010104	0.0276504	1.5583	ATG5:UBE2D1:UBE2D3:IFIH1:TNFAIP3:TRAF3:UBC:PCBP2
REACTOME_DEX_H_BOX_HELICASES_ACTIVATE_TYPE_I_IFN_AND_INFLAMMATORY_CYTOKINES_PRODUCTION	3	1	7	0.00112652	0.0282345	1.54922	NFKB1:RELA:DHX36
REACTOME_IKBA_VARIANT_LEADS_TO_EDA_ID	3	1	7	0.00112652	0.0282345	1.54922	NFKBIA:NFKB1:RELA
REACTOME_TNFS_BIND_THEIR_PHYSIOLOGICAL_RECEPTORS	7	3	28	0.00111401	0.0282345	1.54922	TNFRSF1B:TNFRSF9:TNFSF8:TNFRSF8:TNFSF14:TNFRSF4:TNFRSF18
REACTOME_RNA_POLYMERASE_III_TRANSCRIPTION	9	4	41	0.00107446	0.0282345	1.54922	NFIX:SNAPC1:POLR3E:POLR3H:BDP1:SNAPC4:ZNF143:POLR3D:POLR1C
REACTOME_INSERTION_OF_TAIL_ANCHORED_PROTEINS_INTO_THE_ENDOPLASMIC_RETICULUM_MEMBRANE	6	2	22	0.00113013	0.0282345	1.54922	VAPA:STX1A:SEC61B:SEC61G:APP:PRNP
REACTOME_INTERLEUKIN_17_SIGNALING	13	6	71	0.0011701	0.0287537	1.54131	MAP2K3:TAB2:MAP2K4:PPP2CB:MAP3K8:NFKB1:SKP1:DUSP4:ATF1:IRAK2:DUSP6:UBC:FOS
REACTOME_DEADENYLATION_DEPENDENT_MRNA_DECAY	11	5	56	0.00121414	0.0293547	1.53232	EXOSC7:HBS1L:LSM7:TNKS1BP1:EIF4E:EIF4A2:EIF4A1:LSM6:PAIP1:EXOSC6:DCP1A
REACTOME_TRANSPORT_TO_THE_GOLGI_AND_SUBSEQUENT_MODIFICATION	26	15	185	0.00140478	0.0331925	1.47896	CD59:TMED2:CNIH1:ARFGAP1:GOSR2:GOSR1:PPP6R3:MAN1A1:SEC24A:TBC1D20:NAPG:TMED7:COG2:KDELR2:SEC31A:SEC16A:B4GALT5:MGAT2:ARF4:TMED10:MCFD2:TMED9:F5:ANKRD28:ARFGAP3:SEC22B
REACTOME_CLASS_I_MHC_MEDIATED_ANTIGEN_PROCESSING_PRESENTATION	45	30	370	0.00141716	0.0331925	1.47896	RNF19A:CUL3:HSPA5:PSME4:NEDD4:UBE2D1:UBA5:TRIM9:PSMA6:FBXO31:PSMA2:SEC61B:BLMH:UBE2D3:FBXW7:RNF130:SKP1:SEC24A:UBE3A:CBLB:UBE3D:AREL1:LRRC41:SEC61G:SEC31A:UBC:TRIP12:LONRF1:UBR1:KLHL21:KBTBD8:DTX3L:HECTD2:CUL5:B2M:PDIA3:GLMN:UBE2O:SIAH2:UBE2E2:SOCS3:UBE2G2:SOCS1:GAN:SEC22B
REACTOME_NOTCH2_INTRACELLULAR_DOMAIN_REGULATES_TRANSCRIPTION	4	1	12	0.00152336	0.0340823	1.46747	MAMLD1:GZMB:NOTCH2:RBPJ
REACTOME_TP53_REGULATES_TRANSCRIPTION_OF_DEATH_RECEPTORS_AND_LIGANDS	4	1	12	0.00152336	0.0340823	1.46747	FAS:TNFRSF10A:TNFRSF10B:TP53BP2
REACTOME_INTERLEUKIN_2_SIGNALING	4	1	12	0.00152336	0.0340823	1.46747	IL2:STAT5A:IL2RA:IL2RG
REACTOME_TRANSCRIPTIONAL_REGULATION_BY_TP53	44	29	363	0.00168437	0.0371304	1.43027	FAS:PRDM1:MAPKAPK5:TNFRSF10A:PPP2CB:ELL:RHEB:LAMTOR3:CHD4:PRKAB1:BCL6:GLS:GADD45A:SGK1:TNFRSF10B:BCL2L14:AGO2:CDKN1A:CCNT1:SESN2:MDM2:TTC5:TAF4B:RPTOR:PMAIP1:TP53BP2:TNKS1BP1:UBC:BRPF1:BTG2:WRN:BRD7:CDK12:CRADD:FOS:CYCS:PLK3:PRR5:USP7:HDAC2:TAF13:TXNRD1:TAF15:TAF9
REACTOME_NONSENSE_MEDIATED_DECAY_NMD	18	10	116	0.00182184	0.0395788	1.40254	GSPT1:RPL18A:NCBP2:ETF1:RPL21:RPS10:RPL7:SMG1:RPL26:RPL9:RPL36AL:RPS26:PPP2R2A:RPL41:RPL36A:RBM8A:RPL17:DCP1A
REACTOME_INTERLEUKIN_2_FAMILY_SIGNALING	9	4	44	0.00191474	0.0410029	1.38719	IL21R:IL2:STAT5A:IL2RA:IL15RA:IL21:IL2RG:IL3:CSF2
REACTOME_CREB1_PHOSPHORYLATION_THROUGH_THE_ACTIVATION_OF_CAMKII_CAMKK_CAMKIV_CASCASDE	3	1	8	0.00211207	0.0439722	1.35682	CAMKK1:CAMKK2:KPNA2
REACTOME_TRAIL_SIGNALING	3	1	8	0.00211207	0.0439722	1.35682	CFLAR:TNFRSF10A:TNFRSF10B
REACTOME_NF_KB_IS_ACTIVATED_AND_SIGNALS_SURVIVAL	4	2	13	0.00231523	0.0475415	1.32293	NFKBIA:NFKB1:UBC:RELA
REACTOME_TAK1_ACTIVATES_NFKB_BY_PHOSPHORYLATION_AND_ACTIVATION_OF_IKKS_COMPLEX	7	3	32	0.00284052	0.0575397	1.24003	TAB2:NFKBIA:NFKB1:IRAK2:APP:UBC:RELA
REACTOME_DDX58_IFIH1_MEDIATED_INDUCTION_OF_INTERFERON_ALPHA_BETA	13	7	78	0.0029685	0.0593305	1.22672	ATG5:UBE2D1:NFKBIA:NFKB1:UBE2D3:IFIH1:TNFAIP3:TRAF3:TANK:APP:UBC:RELA:PCBP2
REACTOME_SRP_DEPENDENT_COTRANSLATIONAL_PROTEIN_TARGETING_TO_MEMBRANE	17	9	113	0.00324551	0.0625657	1.20366	RPL18A:SEC61B:RPL21:RPS10:SEC61G:SRPRB:RPL7:SRP19:RPL26:RPL9:RPN1:RPL36AL:SEC11C:RPS26:RPL41:RPL36A:RPL17
REACTOME_NOTCH1_INTRACELLULAR_DOMAIN_REGULATES_TRANSCRIPTION	9	4	47	0.00321921	0.0625657	1.20366	MAMLD1:HIF1A:FBXW7:SKP1:MYC:TLE3:UBC:RBPJ:HDAC2
REACTOME_CALNEXIN_CALRETICULIN_CYCLE	6	3	26	0.00329733	0.0625657	1.20366	SEL1L:DERL2:UGGT1:UBC:SYVN1:PDIA3
REACTOME_MISCELLANEOUS_TRANSPORT_AND_BINDING_EVENTS	6	3	26	0.00329733	0.0625657	1.20366	MAGT1:NIPAL1:LRRC8C:LRRC8D:NIPAL4:LRRC8B
REACTOME_NEGATIVE_REGULATION_OF_MAPK_PATHWAY	8	4	40	0.00342977	0.0642653	1.19202	MARK3:PPP2CB:DUSP4:DUSP5:DUSP6:KSR1:UBC:DUSP2
REACTOME_BH3_ONLY_PROTEINS_ASSOCIATE_WITH_AND_INACTIVATE_ANTI_APOPTOTIC_BCL_2_MEMBERS	3	1	9	0.00356454	0.0651616	1.18601	PMAIP1:BCL2L11:BCL2
REACTOME_REGULATION_OF_PTEN_LOCALIZATION	3	1	9	0.00356454	0.0651616	1.18601	NEDD4:UBC:USP7
REACTOME_INTERLEUKIN_3_INTERLEUKIN_5_AND_GM_CSF_SIGNALING	9	4	48	0.00378425	0.0683444	1.1653	FYN:IL2:STAT5A:IL2RA:IL2RG:UBC:IL3:CSF2:YES1
REACTOME_ANTIGEN_PROCESSING:_UBIQUITINATION_PROTEASOME_DEGRADATION	37	25	308	0.00404728	0.0722247	1.14131	RNF19A:CUL3:PSME4:NEDD4:UBE2D1:UBA5:TRIM9:PSMA6:FBXO31:PSMA2:BLMH:UBE2D3:FBXW7:RNF130:SKP1:UBE3A:CBLB:UBE3D:AREL1:LRRC41:UBC:TRIP12:LONRF1:UBR1:KLHL21:KBTBD8:DTX3L:HECTD2:CUL5:GLMN:UBE2O:SIAH2:UBE2E2:SOCS3:UBE2G2:SOCS1:GAN
REACTOME_RELEASE_OF_APOPTOTIC_FACTORS_FROM_THE_MITOCHONDRIA	2	1	5	0.00438591	0.0738706	1.13153	CYCS:DIABLO
REACTOME_TRANSMISSION_ACROSS_ELECTRICAL_SYNAPSES	2	1	5	0.00438591	0.0738706	1.13153	PANX1:GJC1
REACTOME_FBXW7_MUTANTS_AND_NOTCH1_IN_CANCER	2	1	5	0.00438591	0.0738706	1.13153	FBXW7:SKP1
REACTOME_FASL_CD95L_SIGNALING	2	1	5	0.00438591	0.0738706	1.13153	FAS:FASLG
REACTOME_PTK6_EXPRESSION	2	1	5	0.00438591	0.0738706	1.13153	HIF1A:PELP1
REACTOME_ER_QUALITY_CONTROL_COMPARTMENT_ERQC	5	2	21	0.00468006	0.077949	1.10819	SEL1L:DERL2:UGGT1:UBC:SYVN1
REACTOME_SELENOAMINO_ACID_METABOLISM	17	10	118	0.00519592	0.0855899	1.06758	SARS:RPL18A:RPL21:RPS10:LARS:RPL7:RPL26:RPL9:AIMP1:RPL36AL:MARS:IARS:RPS26:TXNRD1:RPL41:RPL36A:RPL17
REACTOME_ZINC_INFLUX_INTO_CELLS_BY_THE_SLC39_GENE_FAMILY	3	1	10	0.00557133	0.0898003	1.04672	SLC39A14:SLC39A6:SLC39A3
REACTOME_IRAK2_MEDIATED_ACTIVATION_OF_TAK1_COMPLEX	3	1	10	0.00557133	0.0898003	1.04672	TAB2:IRAK2:UBC
REACTOME_MTORC1_MEDIATED_SIGNALLING	5	2	22	0.00601128	0.0938636	1.0275	RHEB:RPS6KB1:LAMTOR3:RPTOR:EIF4E
REACTOME_PINK_PARKIN_MEDIATED_MITOPHAGY	5	2	22	0.00601128	0.0938636	1.0275	ATG5:MAP1LC3A:UBC:TOMM20:TOMM5
REACTOME_NEURODEGENERATIVE_DISEASES	5	2	22	0.00601128	0.0938636	1.0275	SOD2:FASLG:APP:BCL2L11:LMNA
REACTOME_INTERLEUKIN_1_SIGNALING	15	9	102	0.00621952	0.096114	1.01721	TAB2:MAP2K4:PSME4:PSMA6:NFKBIA:PSMA2:MAP3K8:NFKB1:SKP1:IRAK2:IL1RN:APP:UBC:RELA:PELI1
REACTOME_REGULATION_OF_KIT_SIGNALING	4	2	16	0.00643441	0.0964518	1.01569	FYN:SH2B3:YES1:SOCS1
REACTOME_ASSEMBLY_OF_THE_HIV_VIRION	4	2	16	0.00643441	0.0964518	1.01569	FURIN:UBC:VPS37A:VPS37C
REACTOME_P75NTR_SIGNALS_VIA_NF_KB	4	2	16	0.00643441	0.0964518	1.01569	NFKBIA:NFKB1:UBC:RELA
REACTOME_G1_PHASE	8	4	44	0.00669026	0.0983206	1.00736	PPP2CB:CDK6:CCND1:SKP1:CDKN1A:E2F5:UBC:PPP2R2A
REACTOME_TP53_REGULATES_TRANSCRIPTION_OF_CELL_DEATH_GENES	8	4	44	0.00669026	0.0983206	1.00736	FAS:TNFRSF10A:BCL6:TNFRSF10B:BCL2L14:PMAIP1:TP53BP2:CRADD
REACTOME_MRNA_SPLICING	24	15	188	0.00713685	0.103865	0.983529	GCFC2:FUS:TFIP11:NCBP2:SRSF7:PRPF3:SRSF6:HNRNPH2:LSM7:SNRPA1:RBM17:HNRNPA1:TRA2B:CWC22:U2SURP:LSM6:SF1:CSTF3:CSTF2T:SRSF10:PRPF40A:PCBP2:RBM8A:CWC25
REACTOME_REGULATION_OF_TP53_EXPRESSION_AND_DEGRADATION	7	3	37	0.00733345	0.1057	0.975923	PRDM1:PPP2CB:SGK1:MDM2:UBC:PRR5:USP7
REACTOME_GENERIC_TRANSCRIPTION_PATHWAY	118	97	1218	0.00766255	0.106333	0.973332	NFYA:ZNF195:TEAD3:MAMLD1:FAS:PRDM1:PSME4:UBE2D1:ZNF37A:MAPKAPK5:SETD1A:PSMA6:TNFRSF10A:PPP2CB:ELL:CDK6:PSMA2:RHEB:GCK:LAMTOR3:UBE2D3:IL2:FBXW7:CCND1:IFNG:CHD4:PRKAB1:SOD2:VEGFA:SKP1:BCL6:GLS:GADD45A:KDM5B:FASLG:MYB:SGK1:NR4A3:TNFRSF10B:BCL2L14:NR4A1:AGO2:CDKN1A:NR1D1:HIVEP3:SMARCA4:CCNT1:SESN2:ZNF317:RARA:E2F5:NOTCH2:IL2RA:PHC2:MDM2:MED4:TTC5:MYC:TAF4B:RPTOR:PMAIP1:ZNF473:ZNF614:TP53BP2:CAMK2D:NR…
REACTOME_RAF_INDEPENDENT_MAPK1_3_ACTIVATION	5	2	23	0.00759826	0.106333	0.973332	DUSP4:DUSP5:DUSP6:DUSP2:PEA15
REACTOME_TNFR1_INDUCED_NFKAPPAB_SIGNALING_PATHWAY	6	3	30	0.00773202	0.106333	0.973332	BIRC3:TAB2:USP4:TNFAIP3:UBC:TNF
REACTOME_REGULATION_OF_TP53_ACTIVITY	21	13	160	0.0076256	0.106333	0.973332	PRDM1:MAPKAPK5:PPP2CB:CHD4:PRKAB1:SGK1:MDM2:TTC5:TAF4B:TP53BP2:UBC:BRPF1:WRN:BRD7:PLK3:PRR5:USP7:HDAC2:TAF13:TAF15:TAF9
REACTOME_RNA_POLYMERASE_III_TRANSCRIPTION_TERMINATION	5	2	23	0.00759826	0.106333	0.973332	NFIX:POLR3E:POLR3H:POLR3D:POLR1C
REACTOME_REGULATED_PROTEOLYSIS_OF_P75NTR	3	1	11	0.00821194	0.108568	0.964297	NFKB1:ADAM17:RELA
REACTOME_P75NTR_NEGATIVELY_REGULATES_CELL_CYCLE_VIA_SC1	2	1	6	0.0082567	0.108568	0.964297	PRDM4:HDAC2
REACTOME_UPTAKE_AND_FUNCTION_OF_ANTHRAX_TOXINS	3	1	11	0.00821194	0.108568	0.964297	MAP2K3:MAP2K4:FURIN
REACTOME_CLEC7A_INFLAMMASOME_PATHWAY	2	1	6	0.0082567	0.108568	0.964297	NFKB1:RELA
REACTOME_NONSENSE_MEDIATED_DECAY_NMD_INDEPENDENT_OF_THE_EXON_JUNCTION_COMPLEX_EJC	14	8	96	0.00821479	0.108568	0.964297	GSPT1:RPL18A:NCBP2:ETF1:RPL21:RPS10:RPL7:RPL26:RPL9:RPL36AL:RPS26:RPL41:RPL36A:RPL17
REACTOME_METABOLISM_OF_FOLATE_AND_PTERINES	4	2	17	0.00853064	0.109294	0.961403	MTHFD2:MTHFD1L:MTHFD2L:SLC25A32
REACTOME_BUTYRATE_RESPONSE_FACTOR_1_BRF1_BINDS_AND_DESTABILIZES_MRNA	4	2	17	0.00853064	0.109294	0.961403	EXOSC7:ZFP36L1:EXOSC6:DCP1A
REACTOME_TNF_RECEPTOR_SUPERFAMILY_TNFSF_MEMBERS_MEDIATING_NON_CANONICAL_NF_KB_PATHWAY	4	2	17	0.00853064	0.109294	0.961403	BIRC3:CD40LG:TNFSF14:TRAF3
REACTOME_METABOLISM_OF_NON_CODING_RNA	9	5	54	0.00900681	0.112872	0.947412	GEMIN8:DDX20:NCBP2:TGS1:RANBP2:PHAX:SNUPN:SMN1:SMN2
REACTOME_DISEASE	105	86	1075	0.00903582	0.112872	0.947412	GCLC:POMT2:FYN:CLCN6:MAMLD1:GCLM:B4GALT7:MAP2K3:MAP2K4:PSME4:SEL1L:DERL2:MARK3:APBB1IP:DERL3:PSMA6:NFKBIA:RNMT:SLC35A2:DNAJC3:PPP2CB:RPL18A:ELL:CDK6:CBLL1:STX1A:PSMA2:GCK:NFKB1:FBXW7:UNC93B1:CYP27B1:SOD2:QKI:SKP1:CSNK1A1:KPNA1:NCBP2:ABCB6:FASLG:ALG2:RPL21:CHST3:NR4A1:MTRR:RPS10:CDKN1A:LRRFIP1:STAT5A:CCNT1:TRAF3:CHSY1:NOTCH2:MDM2:MYC:FDX1:FURIN:PMM2:KSR1:TAF4B:APP:CAMK2D:RPL7:UBC:MMAA:ADAM17:BCL2L…
REACTOME_INTERLEUKIN_10_SIGNALING	8	4	46	0.00902265	0.112872	0.947412	TNFRSF1B:CCL20:IL10:IL1RN:CSF2:CXCL10:CSF1:TNF
REACTOME_GROWTH_HORMONE_RECEPTOR_SIGNALING	5	2	24	0.00946623	0.114435	0.941443	SOCS2:STAT5A:ADAM17:SOCS3:SOCS1
REACTOME_PROCESSING_OF_CAPPED_INTRON_CONTAINING_PRE_MRNA	29	20	242	0.00931253	0.114435	0.941443	GCFC2:THOC1:FUS:TFIP11:NCBP2:SRSF7:PRPF3:SRSF6:THOC2:HNRNPH2:LSM7:SNRPA1:NXT1:RBM17:HNRNPA1:TRA2B:EIF4E:RANBP2:CWC22:U2SURP:LSM6:SF1:CSTF3:CSTF2T:SRSF10:PRPF40A:PCBP2:RBM8A:CWC25
REACTOME_DISEASES_OF_IMMUNE_SYSTEM	5	2	24	0.00946623	0.114435	0.941443	NFKBIA:NFKB1:UNC93B1:TRAF3:RELA
REACTOME_TRAF6_MEDIATED_NF_KB_ACTIVATION	5	2	24	0.00946623	0.114435	0.941443	NFKBIA:NFKB1:IFIH1:APP:RELA
REACTOME_CYTOSOLIC_SENSORS_OF_PATHOGEN_ASSOCIATED_DNA	10	5	63	0.00986244	0.11827	0.927124	POLR3E:POLR3H:NFKBIA:NFKB1:LRRFIP1:UBC:POLR3D:POLR1C:RELA:DHX36
REACTOME_PRE_NOTCH_PROCESSING_IN_GOLGI	4	2	18	0.0110556	0.130491	0.884418	SEL1L:TMED2:NOTCH2:FURIN
REACTOME_RNA_POLYMERASE_III_CHAIN_ELONGATION	4	2	18	0.0110556	0.130491	0.884418	POLR3E:POLR3H:POLR3D:POLR1C
REACTOME_BASIGIN_INTERACTIONS	5	2	25	0.0116398	0.131188	0.882106	SLC7A5:ATP1B1:SLC7A11:SLC16A1:SLC3A2
REACTOME_COSTIMULATION_BY_THE_CD28_FAMILY	11	6	73	0.0115986	0.131188	0.882106	FYN:PPP2CB:MAP3K8:CD274:ICOSLG:ICOS:YES1:BTLA:PRR5:TRAV8-4:TRAV19
REACTOME_DEADENYLATION_OF_MRNA	5	2	25	0.0116398	0.131188	0.882106	TNKS1BP1:EIF4E:EIF4A2:EIF4A1:PAIP1
REACTOME_GLUTATHIONE_SYNTHESIS_AND_RECYCLING	3	1	12	0.0115562	0.131188	0.882106	GCLC:GCLM:CHAC1
REACTOME_TICAM1_DEPENDENT_ACTIVATION_OF_IRF3_IRF7	3	1	12	0.0115562	0.131188	0.882106	TRAF3:TANK:UBC
REACTOME_ANTIGEN_PRESENTATION:_FOLDING_ASSEMBLY_AND_PEPTIDE_LOADING_OF_CLASS_I_MHC	5	2	25	0.0116398	0.131188	0.882106	HSPA5:SEC24A:SEC31A:B2M:PDIA3
REACTOME_CHEMOKINE_RECEPTORS_BIND_CHEMOKINES	8	4	48	0.0119232	0.13338	0.87491	CCL20:CXCL9:XCL1:XCL2:CXCL3:CXCL10:CXCL11:CCR4
REACTOME_REGULATION_OF_TNFR1_SIGNALING	6	3	33	0.0131918	0.146478	0.834228	BIRC3:USP4:TNFAIP3:SPPL2A:UBC:TNF
REACTOME_ATTACHMENT_OF_GPI_ANCHOR_TO_UPAR	2	1	7	0.0136043	0.146711	0.833536	PIGT:PGAP1
REACTOME_INTERLEUKIN_1_FAMILY_SIGNALING	18	12	139	0.013343	0.146711	0.833536	TAB2:MAP2K4:PSME4:PSMA6:NFKBIA:PSMA2:MAP3K8:NFKB1:SKP1:IL18R1:IL18RAP:IRAK2:IL1RN:APP:UBC:RELA:PTPN2:PELI1
REACTOME_TRNA_PROCESSING_IN_THE_MITOCHONDRION	2	1	7	0.0136043	0.146711	0.833536	TRNT1:TRMT10C
REACTOME_ACTIVATION_OF_RAC1_DOWNSTREAM_OF_NMDARS	2	1	7	0.0136043	0.146711	0.833536	CAMKK1:CAMKK2
REACTOME_FOXO_MEDIATED_TRANSCRIPTION	10	6	66	0.0138673	0.148479	0.828336	NFYA:GCK:SOD2:BCL6:GADD45A:FASLG:CDKN1A:BCL2L11:DDIT3:HDAC2
REACTOME_TICAM1_RIP1_MEDIATED_IKK_COMPLEX_RECRUITMENT	4	2	19	0.014046	0.149293	0.82596	BIRC3:UBE2D1:UBE2D3:UBC
REACTOME_CASPASE_ACTIVATION_VIA_EXTRINSIC_APOPTOTIC_SIGNALLING_PATHWAY	5	3	26	0.0141425	0.149293	0.82596	CFLAR:FAS:TNFRSF10A:FASLG:TNFRSF10B
REACTOME_ERKS_ARE_INACTIVATED	3	2	13	0.0156633	0.160818	0.793667	PPP2CB:DUSP4:DUSP6
REACTOME_MITOCHONDRIAL_IRON_SULFUR_CLUSTER_BIOGENESIS	3	2	13	0.0156633	0.160818	0.793667	ISCA1:FDX1:LYRM4
REACTOME_NUCLEAR_ENVELOPE_REASSEMBLY	3	2	13	0.0156633	0.160818	0.793667	LMNA:ANKLE2:PPP2R2A
REACTOME_TNFR1_INDUCED_PROAPOPTOTIC_SIGNALING	3	2	13	0.0156633	0.160818	0.793667	USP4:TNFAIP3:TNF
REACTOME_INTERLEUKIN_RECEPTOR_SHC_SIGNALING	5	3	27	0.0169968	0.173321	0.761148	IL2:IL2RA:IL2RG:IL3:CSF2
REACTOME_N_GLYCAN_TRIMMING_IN_THE_ER_AND_CALNEXIN_CALRETICULIN_CYCLE	6	3	35	0.0180987	0.18331	0.736814	SEL1L:DERL2:UGGT1:UBC:SYVN1:PDIA3
REACTOME_INFECTIOUS_DISEASE	41	31	382	0.0183255	0.184362	0.734329	FYN:MAP2K3:MAP2K4:PSME4:PSMA6:RNMT:DNAJC3:RPL18A:ELL:CBLL1:STX1A:PSMA2:SKP1:KPNA1:NCBP2:RPL21:RPS10:CCNT1:FURIN:TAF4B:RPL7:UBC:RANBP2:VPS37A:RPL26:RPL9:RPL36AL:CUL5:B2M:VPS37C:LIG4:KPNA2:KPNA4:RPS26:TAF13:TXNRD1:RPL41:RPL36A:RPL17:TAF15:TAF9
REACTOME_REGULATION_OF_PTEN_GENE_TRANSCRIPTION	9	5	60	0.0185076	0.184953	0.732939	RHEB:LAMTOR3:CHD4:EGR1:SNAI1:PHC2:RPTOR:BMI1:HDAC2
REACTOME_SPHINGOLIPID_DE_NOVO_BIOSYNTHESIS	7	4	44	0.0206506	0.186477	0.729374	VAPA:OSBP:PRKD3:KDSR:ORMDL2:SGPP2:SGPL1
REACTOME_VEGF_LIGAND_RECEPTOR_INTERACTIONS	2	1	8	0.0204997	0.186477	0.729374	FLT1:VEGFA
REACTOME_P75_NTR_RECEPTOR_MEDIATED_SIGNALLING	13	8	97	0.0201777	0.186477	0.729374	TRIO:NFKBIA:NFKB1:PRDM4:ARHGEF2:SMPD2:UBC:ADAM17:BCL2L11:TIAM1:ARHGEF3:RELA:HDAC2
REACTOME_SEMA3A_PLEXIN_REPULSION_SIGNALING_BY_INHIBITING_INTEGRIN_ADHESION	3	2	14	0.0205811	0.186477	0.729374	FARP2:FYN:PLXNA1
REACTOME_SMAC_XIAP_REGULATED_APOPTOTIC_RESPONSE	2	1	8	0.0204997	0.186477	0.729374	CYCS:DIABLO
REACTOME_WNT_MEDIATED_ACTIVATION_OF_DVL	2	1	8	0.0204997	0.186477	0.729374	DVL1:CSNK1E
REACTOME_TRANSCRIPTIONAL_ACTIVITY_OF_SMAD2_SMAD3:SMAD4_HETEROTRIMER	7	4	44	0.0206506	0.186477	0.729374	UBE2D1:UBE2D3:CCNT1:E2F5:MYC:UBC:JUNB
REACTOME_INTERLEUKIN_1_PROCESSING	2	1	8	0.0204997	0.186477	0.729374	NFKB1:RELA
REACTOME_SYNTHESIS_OF_DIPHTHAMIDE_EEF2	2	1	8	0.0204997	0.186477	0.729374	DPH2:DPH3
REACTOME_TP53_REGULATES_TRANSCRIPTION_OF_SEVERAL_ADDITIONAL_CELL_DEATH_GENES_WHOSE_SPECIFIC_ROLES_IN_P53_DEPENDENT_APOPTOSIS_REMAIN_UNCERTAIN	3	2	14	0.0205811	0.186477	0.729374	BCL6:BCL2L14:TP53BP2
REACTOME_RNA_POLYMERASE_III_TRANSCRIPTION_INITIATION_FROM_TYPE_1_PROMOTER	5	3	28	0.0202236	0.186477	0.729374	POLR3E:POLR3H:BDP1:POLR3D:POLR1C
REACTOME_RUNX1_REGULATES_TRANSCRIPTION_OF_GENES_INVOLVED_IN_DIFFERENTIATION_OF_KERATINOCYTES	2	1	8	0.0204997	0.186477	0.729374	SOCS4:SOCS3
REACTOME_RUNX3_REGULATES_WNT_SIGNALING	2	1	8	0.0204997	0.186477	0.729374	CCND1:MYC
REACTOME_GLUTAMATE_AND_GLUTAMINE_METABOLISM	3	2	14	0.0205811	0.186477	0.729374	ALDH18A1:GLS:GLUL
REACTOME_INTERLEUKIN_15_SIGNALING	3	2	14	0.0205811	0.186477	0.729374	STAT5A:IL15RA:IL2RG
REACTOME_INTERLEUKIN_18_SIGNALING	2	1	8	0.0204997	0.186477	0.729374	IL18R1:IL18RAP
REACTOME_CD209_DC_SIGN_SIGNALING	4	2	21	0.0215522	0.193453	0.713424	FYN:RELB:NFKB1:RELA
REACTOME_MITOPHAGY	5	3	29	0.0238421	0.211475	0.67474	ATG5:MAP1LC3A:UBC:TOMM20:TOMM5
REACTOME_UPTAKE_AND_ACTIONS_OF_BACTERIAL_TOXINS	5	3	29	0.0238421	0.211475	0.67474	MAP2K3:MAP2K4:STX1A:FURIN:TXNRD1
REACTOME_CLEC7A_DECTIN_1_SIGNALING	13	8	100	0.0256375	0.226062	0.645772	TAB2:PSME4:UBE2D1:PSMA6:NFKBIA:RELB:PSMA2:NFKB1:SKP1:UBC:ITPR1:PRKCD:RELA
REACTOME_JNK_C_JUN_KINASES_PHOSPHORYLATION_AND_ACTIVATION_MEDIATED_BY_ACTIVATED_HUMAN_TAK1	4	2	22	0.026123	0.228997	0.640171	TAB2:MAP2K4:IRAK2:UBC
REACTOME_MRNA_DECAY_BY_5_TO_3_EXORIBONUCLEASE	3	2	15	0.026346	0.229609	0.639011	LSM7:LSM6:DCP1A
REACTOME_SIGNALING_BY_NOTCH1	10	6	73	0.027853	0.23081	0.636745	MAMLD1:HIF1A:FBXW7:SKP1:MYC:TLE3:UBC:ADAM17:RBPJ:HDAC2
REACTOME_SIGNALING_BY_TGF_BETA_RECEPTOR_COMPLEX	10	6	73	0.027853	0.23081	0.636745	UBE2D1:PPP1R15A:UBE2D3:CCNT1:E2F5:MYC:FURIN:UBC:ZFYVE9:JUNB
REACTOME_REGULATION_OF_CHOLESTEROL_BIOSYNTHESIS_BY_SREBP_SREBF	8	5	55	0.0276279	0.23081	0.636745	NFYA:HMGCS1:HMGCR:SEC24A:SCAP:TGS1:INSIG1:MTF1
REACTOME_TRANSCRIPTIONAL_ACTIVATION_OF_MITOCHONDRIAL_BIOGENESIS	8	5	55	0.0276279	0.23081	0.636745	GABPB1:TFAM:SOD2:NR1D1:TGS1:PPRC1:TFB2M:CYCS
REACTOME_HSF1_DEPENDENT_TRANSACTIVATION	6	4	38	0.0276636	0.23081	0.636745	DNAJB6:HSPA2:RPTOR:CAMK2D:TNFRSF21:HSPA6
REACTOME_OVARIAN_TUMOR_DOMAIN_PROTEASES	6	4	38	0.0276636	0.23081	0.636745	TNIP3:UBE2D1:IFIH1:TNFAIP3:TRAF3:UBC
REACTOME_COPI_MEDIATED_ANTEROGRADE_TRANSPORT	13	9	101	0.0276804	0.23081	0.636745	CD59:TMED2:ARFGAP1:GOSR2:GOSR1:NAPG:TMED7:COG2:KDELR2:ARF4:TMED10:TMED9:ARFGAP3
REACTOME_SYNTHESIS_OF_ACTIVE_UBIQUITIN:_ROLES_OF_E1_AND_E2_ENZYMES	5	3	30	0.0278697	0.23081	0.636745	UBE2D1:UCHL3:UBC:UBE2G2:USP7
REACTOME_METABOLISM_OF_STEROIDS	18	12	150	0.0277219	0.23081	0.636745	NFYA:MSMO1:OSBPL3:SLC27A5:OSBP:CYP27B1:HMGCS1:HMGCR:SEC24A:SCAP:TGS1:FDX1:SLC27A2:NSDHL:STARD4:HSD11B2:INSIG1:MTF1
REACTOME_INTEGRATION_OF_PROVIRUS	2	1	9	0.0289673	0.232203	0.634132	KPNA1:LIG4
REACTOME_DOWNREGULATION_OF_ERBB4_SIGNALING	2	1	9	0.0289673	0.232203	0.634132	NEDD4:UBC
REACTOME_SMALL_INTERFERING_RNA_SIRNA_BIOGENESIS	2	1	9	0.0289673	0.232203	0.634132	AGO2:PRKRA
REACTOME_TRNA_MODIFICATION_IN_THE_MITOCHONDRION	2	1	9	0.0289673	0.232203	0.634132	TRIT1:TRMT10C
REACTOME_INLA_MEDIATED_ENTRY_OF_LISTERIA_MONOCYTOGENES_INTO_HOST_CELLS	2	1	9	0.0289673	0.232203	0.634132	CBLL1:UBC
REACTOME_INTERLEUKIN_9_SIGNALING	2	1	9	0.0289673	0.232203	0.634132	STAT5A:IL2RG
REACTOME_INTRA_GOLGI_AND_RETROGRADE_GOLGI_TO_ER_TRAFFIC	23	17	202	0.0294287	0.234647	0.629585	TMED2:KIF9:ARFGAP1:GOSR2:GOSR1:MAN1A1:RAB9A:NAPG:TMED7:COG2:STX6:KDELR2:GALNT1:GOLGA4:SURF4:USP6NL:RHOBTB3:ARF4:TMED10:TMED9:BICD2:ARFGAP3:SEC22B
REACTOME_RNA_POLYMERASE_I_TRANSCRIPTION_INITIATION	7	4	47	0.0297605	0.236037	0.627021	POLR1A:CHD4:CD3EAP:POLR1B:TAF1D:POLR1C:HDAC2
REACTOME_TCR_SIGNALING	15	10	122	0.0310387	0.24286	0.614644	TAB2:PSME4:UBE2D1:PSMA6:NFKBIA:PSMA2:NFKB1:ITK:SKP1:VASP:PTPN22:UBC:RELA:TRAV8-4:TRAV19
REACTOME_ACTIVATED_TAK1_MEDIATES_P38_MAPK_ACTIVATION	4	2	23	0.0312688	0.24286	0.614644	MAP2K3:TAB2:IRAK2:UBC
REACTOME_IKK_COMPLEX_RECRUITMENT_MEDIATED_BY_RIP1	4	2	23	0.0312688	0.24286	0.614644	BIRC3:UBE2D1:UBE2D3:UBC
REACTOME_SIGNALING_BY_BRAF_AND_RAF_FUSIONS	9	6	65	0.0308436	0.24286	0.614644	CLCN6:MARK3:APBB1IP:QKI:KSR1:CAMK2D:BCL2L11:LMNA:TRAK1
REACTOME_MTOR_SIGNALLING	6	4	39	0.0314929	0.243339	0.613788	RHEB:RPS6KB1:LAMTOR3:PRKAB1:RPTOR:EIF4E
REACTOME_MAPK_TARGETS_NUCLEAR_EVENTS_MEDIATED_BY_MAP_KINASES	5	3	31	0.0323215	0.247193	0.606963	PPP2CB:DUSP4:ATF1:DUSP6:FOS
REACTOME_RNA_POLYMERASE_I_TRANSCRIPTION_TERMINATION	5	3	31	0.0323215	0.247193	0.606963	POLR1A:CD3EAP:POLR1B:TAF1D:POLR1C
REACTOME_CRMPS_IN_SEMA3A_SIGNALING	3	2	16	0.0329833	0.248452	0.604758	FYN:PLXNA1:DPYSL4
REACTOME_MRNA_DECAY_BY_3_TO_5_EXORIBONUCLEASE	3	2	16	0.0329833	0.248452	0.604758	EXOSC7:HBS1L:EXOSC6
REACTOME_TRAF6_MEDIATED_INDUCTION_OF_TAK1_COMPLEX_WITHIN_TLR4_COMPLEX	3	2	16	0.0329833	0.248452	0.604758	TAB2:IRAK2:UBC
REACTOME_METABOLISM_OF_WATER_SOLUBLE_VITAMINS_AND_COFACTORS	15	10	123	0.0331673	0.248589	0.604518	MTHFD2:SLC23A2:ABCC1:NAMPT:SLC19A2:PANK3:MTHFD1L:MTRR:RFK:NT5E:PARP9:MMAA:MTHFD2L:SLC25A32:PARP14
REACTOME_RNA_POLYMERASE_II_TRANSCRIPTION_TERMINATION	9	6	66	0.033875	0.25263	0.597515	THOC1:NCBP2:SRSF7:SRSF6:THOC2:ZNF473:CSTF3:CSTF2T:RBM8A
REACTOME_DAG_AND_IP3_SIGNALING	6	4	40	0.0356615	0.264637	0.57735	CAMKK1:CAMKK2:CAMK2D:ITPR1:PRKCD:KPNA2
REACTOME_ACTIVATION_OF_NF_KAPPAB_IN_B_CELLS	9	6	67	0.0371087	0.272092	0.565284	PSME4:PSMA6:NFKBIA:PSMA2:NFKB1:SKP1:UBC:REL:RELA
REACTOME_SMAD2_SMAD3:SMAD4_HETEROTRIMER_REGULATES_TRANSCRIPTION	5	3	32	0.0372107	0.272092	0.565284	CCNT1:E2F5:MYC:UBC:JUNB
REACTOME_RETROGRADE_TRANSPORT_AT_THE_TRANS_GOLGI_NETWORK	7	4	49	0.0371752	0.272092	0.565284	RAB9A:NAPG:COG2:STX6:GOLGA4:USP6NL:RHOBTB3
REACTOME_SIGNALING_BY_NOTCH1_IN_CANCER	8	5	58	0.0375189	0.273014	0.563815	MAMLD1:FBXW7:SKP1:MYC:UBC:ADAM17:RBPJ:HDAC2
REACTOME_SYNTHESIS_OF_PYROPHOSPHATES_IN_THE_CYTOSOL	2	1	10	0.0389941	0.279816	0.553127	NUDT4:NUDT11
REACTOME_TRANSCRIPTIONAL_REGULATION_BY_RUNX3	12	8	96	0.0390138	0.279816	0.553127	TEAD3:MAMLD1:PSMA6:PSMA2:CCND1:CDKN1A:MDM2:MYC:UBC:BCL2L11:RBPJ:BRD2
REACTOME_RUNX3_REGULATES_P14_ARF	2	1	10	0.0389941	0.279816	0.553127	CCND1:BRD2
REACTOME_ZINC_TRANSPORTERS	3	2	17	0.0405071	0.283739	0.547081	SLC39A14:SLC39A6:SLC39A3
REACTOME_ACTIVATION_OF_IRF3_IRF7_MEDIATED_BY_TBK1_IKK_EPSILON	3	2	17	0.0405071	0.283739	0.547081	TRAF3:TANK:UBC
REACTOME_RIP_MEDIATED_NFKB_ACTIVATION_VIA_ZBP1	3	2	17	0.0405071	0.283739	0.547081	NFKBIA:NFKB1:RELA
REACTOME_TRISTETRAPROLIN_TTP_ZFP36_BINDS_AND_DESTABILIZES_MRNA	3	2	17	0.0405071	0.283739	0.547081	EXOSC7:EXOSC6:DCP1A
REACTOME_REGULATION_OF_RUNX1_EXPRESSION_AND_ACTIVITY	3	2	17	0.0405071	0.283739	0.547081	CDK6:CCND1:AGO2
REACTOME_SIGNALING_BY_NOTCH2	5	3	33	0.0425483	0.293917	0.531776	MAMLD1:GZMB:NOTCH2:UBC:RBPJ
REACTOME_AMINO_ACID_TRANSPORT_ACROSS_THE_PLASMA_MEMBRANE	5	3	33	0.0425483	0.293917	0.531776	SLC7A5:SLC38A1:SLC7A1:SLC7A11:SLC3A2
REACTOME_PROGRAMMED_CELL_DEATH	20	15	178	0.0423833	0.293917	0.531776	CFLAR:BIRC3:FAS:PSME4:GZMB:PSMA6:TNFRSF10A:PSMA2:KPNA1:FASLG:TNFRSF10B:PMAIP1:TP53BP2:UBC:BCL2L11:LMNA:PRKCD:BCL2:CYCS:DIABLO
REACTOME_NUCLEAR_EVENTS_KINASE_AND_TRANSCRIPTION_FACTOR_ACTIVATION	4	2	25	0.043348	0.296706	0.527674	PPP2CB:DUSP4:ATF1:DUSP6
REACTOME_CHOLESTEROL_BIOSYNTHESIS	4	2	25	0.043348	0.296706	0.527674	MSMO1:HMGCS1:HMGCR:NSDHL
REACTOME_POST_TRANSLATIONAL_PROTEIN_MODIFICATION	129	114	1429	0.044934	0.305823	0.51453	POMT2:BIRC3:CUL3:RCN1:TNIP3:NOP58:PSME4:RAB27A:SEL1L:UBE2D1:DERL2:RAB21:CD59:TMED2:UIMC1:NANS:LGALS1:APOL1:CNIH1:HIF1A:PSMA6:NFKBIA:ARFGAP1:ACTR5:USP14:MAGT1:DNAJC3:FBXO31:USP42:PSMA2:GOSR2:GOSR1:UBE2D3:FBXW7:PPP6R3:MAN1A1:SKP1:SEC24A:USP4:IFIH1:UAP1:TNFAIP3:UCHL3:SENP5:ALG2:DCAF4:ALG5:SOCS2:RAB9A:PIGT:TBC1D20:INO80:TRAF3:RARA:LRRC41:DPH2:NAPG:PHC2:TMED7:MDM2:COG2:NPL:TTLL4:KDELR2:UGGT1:MYC:SEC31…
REACTOME_PTEN_REGULATION	16	11	138	0.045088	0.305823	0.51453	PSME4:NEDD4:PSMA6:PSMA2:RHEB:LAMTOR3:CHD4:EGR1:AGO2:SNAI1:PHC2:RPTOR:UBC:BMI1:USP7:HDAC2
REACTOME_ACTIVATION_OF_THE_MRNA_UPON_BINDING_OF_THE_CAP_BINDING_COMPLEX_AND_EIFS_AND_SUBSEQUENT_BINDING_TO_43S	8	5	60	0.0453126	0.305962	0.514333	EIF3J:EIF3A:RPS10:EIF4E:EIF4A2:EIF4A1:EIF1AX:RPS26
REACTOME_INTRINSIC_PATHWAY_FOR_APOPTOSIS	7	5	51	0.0457388	0.307455	0.512219	GZMB:PMAIP1:TP53BP2:BCL2L11:BCL2:CYCS:DIABLO
REACTOME_SLBP_DEPENDENT_PROCESSING_OF_REPLICATION_DEPENDENT_HISTONE_PRE_MRNAS	2	1	11	0.0505374	0.31606	0.500231	NCBP2:ZNF473
REACTOME_METAL_ION_SLC_TRANSPORTERS	4	3	26	0.0503017	0.31606	0.500231	SLC39A14:SLC41A2:SLC39A6:SLC39A3
REACTOME_INTERFERON_ALPHA_BETA_SIGNALING	9	6	70	0.0480743	0.31606	0.500231	IFIT3:EGR1:IRF1:IRF4:IRF8:GBP2:SOCS3:SOCS1:IRF9
REACTOME_ACTIVATION_OF_NOXA_AND_TRANSLOCATION_TO_MITOCHONDRIA	1	1	5	0.0533443	0.31606	0.500231	PMAIP1
REACTOME_REGULATION_OF_GENE_EXPRESSION_BY_HYPOXIA_INDUCIBLE_FACTOR	2	1	11	0.0505374	0.31606	0.500231	HIF1A:VEGFA
REACTOME_INTERLEUKIN_7_SIGNALING	5	3	34	0.0483427	0.31606	0.500231	SOCS2:STAT5A:SMARCA4:IL2RG:SOCS1
REACTOME_VITAMIN_B1_THIAMIN_METABOLISM	1	1	5	0.0533443	0.31606	0.500231	SLC19A2
REACTOME_SIGNALING_BY_LEPTIN	2	1	11	0.0505374	0.31606	0.500231	STAT5A:SOCS3
REACTOME_LRR_FLII_INTERACTING_PROTEIN_1_LRRFIP1_ACTIVATES_TYPE_I_IFN_PRODUCTION	1	1	5	0.0533443	0.31606	0.500231	LRRFIP1
REACTOME_REGULATION_OF_LIPID_METABOLISM_BY_PEROXISOME_PROLIFERATOR_ACTIVATED_RECEPTOR_ALPHA_PPARALPHA	14	10	119	0.0485059	0.31606	0.500231	NFYA:AHR:HMGCS1:HMGCR:NR1D1:CLOCK:MED4:TGS1:MED9:TNFRSF21:ACSL1:MED19:MTF1:TXNRD1
REACTOME_SODIUM_COUPLED_PHOSPHATE_COTRANSPORTERS	1	1	5	0.0533443	0.31606	0.500231	SLC20A1
REACTOME_SYNTHESIS_OF_GDP_MANNOSE	1	1	5	0.0533443	0.31606	0.500231	PMM2
REACTOME_SUMOYLATION_OF_IMMUNE_RESPONSE_PROTEINS	2	1	11	0.0505374	0.31606	0.500231	NFKBIA:RELA
REACTOME_DEFECTIVE_LFNG_CAUSES_SCDO3	1	1	5	0.0533443	0.31606	0.500231	NOTCH2
REACTOME_NEGATIVE_REGULATION_OF_TCF_DEPENDENT_SIGNALING_BY_DVL_INTERACTING_PROTEINS	1	1	5	0.0533443	0.31606	0.500231	DVL1
REACTOME_DISEASES_ASSOCIATED_WITH_GLYCOSYLATION_PRECURSOR_BIOSYNTHESIS	3	2	18	0.0489219	0.31606	0.500231	PMM2:NUS1:GNE
REACTOME_CONSTITUTIVE_SIGNALING_BY_AKT1_E17K_IN_CANCER	4	3	26	0.0503017	0.31606	0.500231	NR4A1:CDKN1A:MDM2:PRR5
REACTOME_COPI_DEPENDENT_GOLGI_TO_ER_RETROGRADE_TRAFFIC	12	8	99	0.0482112	0.31606	0.500231	TMED2:KIF9:ARFGAP1:NAPG:TMED7:KDELR2:SURF4:ARF4:TMED10:TMED9:ARFGAP3:SEC22B
REACTOME_GALACTOSE_CATABOLISM	1	1	5	0.0533443	0.31606	0.500231	PGM2L1
REACTOME_PROPIONYL_COA_CATABOLISM	1	1	5	0.0533443	0.31606	0.500231	MMAA
REACTOME_PTK6_REGULATES_PROTEINS_INVOLVED_IN_RNA_PROCESSING	1	1	5	0.0533443	0.31606	0.500231	SFPQ
REACTOME_REELIN_SIGNALLING_PATHWAY	1	1	5	0.0533443	0.31606	0.500231	FYN
REACTOME_RECEPTOR_MEDIATED_MITOPHAGY	2	1	11	0.0505374	0.31606	0.500231	ATG5:MAP1LC3A
REACTOME_RUNX1_REGULATES_TRANSCRIPTION_OF_GENES_INVOLVED_IN_INTERLEUKIN_SIGNALING	1	1	5	0.0533443	0.31606	0.500231	IL3
REACTOME_RUNX3_REGULATES_BCL2L11_BIM_TRANSCRIPTION	1	1	5	0.0533443	0.31606	0.500231	BCL2L11
REACTOME_ASPARTATE_AND_ASPARAGINE_METABOLISM	2	1	11	0.0505374	0.31606	0.500231	ASNS:GOT1
REACTOME_REGULATION_OF_EXPRESSION_OF_SLITS_AND_ROBOS	19	14	172	0.0530013	0.31606	0.500231	PSME4:PSMA6:GSPT1:RPL18A:PSMA2:NCBP2:ETF1:RPL21:RPS10:RPL7:UBC:RPL26:RPL9:RPL36AL:RPS26:RPL41:RPL36A:RBM8A:RPL17
REACTOME_TICAM1_TRAF6_DEPENDENT_INDUCTION_OF_TAK1_COMPLEX	2	1	11	0.0505374	0.31606	0.500231	TAB2:UBC
REACTOME_NTRK2_ACTIVATES_RAC1	1	1	5	0.0533443	0.31606	0.500231	FYN
REACTOME_N_GLYCAN_TRIMMING_AND_ELONGATION_IN_THE_CIS_GOLGI	1	1	5	0.0533443	0.31606	0.500231	MAN1A1
REACTOME_DOWNSTREAM_TCR_SIGNALING	12	9	101	0.0551155	0.321219	0.493198	TAB2:PSME4:UBE2D1:PSMA6:NFKBIA:PSMA2:NFKB1:SKP1:UBC:RELA:TRAV8-4:TRAV19
REACTOME_NUCLEAR_RECEPTOR_TRANSCRIPTION_PATHWAY	7	5	53	0.0555009	0.321219	0.493198	NR4A3:NR4A1:NR1D1:RARA:NR6A1:NRBF2:NR4A2
REACTOME_NOD1_2_SIGNALING_PATHWAY	5	3	35	0.0546001	0.321219	0.493198	BIRC3:TAB2:TNFAIP3:IRAK2:UBC
REACTOME_G_PROTEIN_MEDIATED_EVENTS	7	5	53	0.0555009	0.321219	0.493198	CAMKK1:CAMKK2:GNAI1:CAMK2D:ITPR1:PRKCD:KPNA2
REACTOME_CELLULAR_RESPONSE_TO_HEAT_STRESS	12	9	101	0.0551155	0.321219	0.493198	HSPA5:DNAJC2:DNAJB6:BAG1:HSPA2:RPTOR:CAMK2D:TNFRSF21:RANBP2:HSPA13:EEF1A1:HSPA6
REACTOME_INTRACELLULAR_SIGNALING_BY_SECOND_MESSENGERS	31	24	302	0.0551257	0.321219	0.493198	CAMKK1:FYN:PSME4:NEDD4:PSMA6:PPP2CB:PSMA2:RHEB:LAMTOR3:CAMKK2:CHD4:EGR1:NR4A1:AGO2:SNAI1:CDKN1A:PHC2:MDM2:IER3:RPTOR:CAMK2D:UBC:ITPR1:ICOS:PRKCD:BMI1:KPNA2:PRR5:USP7:HDAC2:PDGFA
REACTOME_INTRA_GOLGI_TRAFFIC	6	4	44	0.0559004	0.322287	0.491757	GOSR2:GOSR1:MAN1A1:NAPG:COG2:STX6
REACTOME_PROCESSING_OF_INTRONLESS_PRE_MRNAS	3	2	19	0.0582221	0.328101	0.483992	NCBP2:CSTF3:CSTF2T
REACTOME_ANTIVIRAL_MECHANISM_BY_IFN_STIMULATED_GENES	10	7	82	0.0579025	0.328101	0.483992	NEDD4:KPNA1:UBC:EIF4E:RANBP2:EIF4A2:EIF4A1:PDE12:KPNA2:KPNA4
REACTOME_NICOTINAMIDE_SALVAGING	3	2	19	0.0582221	0.328101	0.483992	NAMPT:PARP9:PARP14
REACTOME_VEGFR2_MEDIATED_CELL_PROLIFERATION	3	2	19	0.0582221	0.328101	0.483992	VEGFA:ITPR1:PRKCD
REACTOME_PHASE_4_RESTING_MEMBRANE_POTENTIAL	3	2	19	0.0582221	0.328101	0.483992	KCNK15:KCNK5:KCNJ14
REACTOME_REGULATION_OF_TP53_ACTIVITY_THROUGH_METHYLATION	3	2	19	0.0582221	0.328101	0.483992	MDM2:TTC5:UBC
REACTOME_PROTEIN_LOCALIZATION	18	13	164	0.0599513	0.33658	0.472911	UBE2D1:VAPA:STX1A:SEC61B:PITRM1:UBE2D3:GRPEL1:TIMM8A:SEC61G:ATAD1:PEX5:SLC27A2:APP:UBC:PRNP:TOMM20:TOMM5:PEX26
REACTOME_CA_DEPENDENT_EVENTS	5	3	36	0.0613243	0.343004	0.464701	CAMKK1:CAMKK2:CAMK2D:PRKCD:KPNA2
REACTOME_PECAM1_INTERACTIONS	2	1	12	0.0635311	0.350122	0.455781	FYN:YES1
REACTOME_PREGNENOLONE_BIOSYNTHESIS	2	1	12	0.0635311	0.350122	0.455781	FDX1:STARD4
REACTOME_RRNA_PROCESSING_IN_THE_MITOCHONDRION	2	1	12	0.0635311	0.350122	0.455781	NSUN4:TRMT10C
REACTOME_REGULATION_OF_GLYCOLYSIS_BY_FRUCTOSE_2_6_BISPHOSPHATE_METABOLISM	2	1	12	0.0635311	0.350122	0.455781	PPP2CB:PFKFB2
REACTOME_NOTCH_HLH_TRANSCRIPTION_PATHWAY	4	3	28	0.0660551	0.358756	0.445201	MAMLD1:NOTCH2:RBPJ:HDAC2
REACTOME_PROCESSING_OF_CAPPED_INTRONLESS_PRE_MRNA	4	3	28	0.0660551	0.358756	0.445201	NCBP2:ZNF473:CSTF3:CSTF2T
REACTOME_ENERGY_DEPENDENT_REGULATION_OF_MTOR_BY_LKB1_AMPK	4	3	28	0.0660551	0.358756	0.445201	RHEB:LAMTOR3:PRKAB1:RPTOR
REACTOME_ATTENUATION_PHASE	4	3	28	0.0660551	0.358756	0.445201	DNAJB6:HSPA2:TNFRSF21:HSPA6
REACTOME_CHONDROITIN_SULFATE_BIOSYNTHESIS	3	2	20	0.0683939	0.368124	0.434006	CHPF2:CHST3:CHSY1
REACTOME_RUNX1_INTERACTS_WITH_CO_FACTORS_WHOSE_PRECISE_EFFECT_ON_RUNX1_TARGETS_IS_NOT_KNOWN	5	3	37	0.0685168	0.368124	0.434006	SMARCA4:PHC2:RYBP:BMI1:PCGF5
REACTOME_NOTCH4_INTRACELLULAR_DOMAIN_REGULATES_TRANSCRIPTION	3	2	20	0.0683939	0.368124	0.434006	MAMLD1:NOTCH2:RBPJ
REACTOME_HEDGEHOG_LIGAND_BIOGENESIS	8	6	65	0.0692893	0.370945	0.43069	PSME4:SEL1L:DERL2:PSMA6:PSMA2:UBC:ADAM17:SYVN1
REACTOME_DEUBIQUITINATION	30	24	298	0.070858	0.377993	0.422516	BIRC3:TNIP3:PSME4:UBE2D1:UIMC1:HIF1A:PSMA6:NFKBIA:ACTR5:USP14:USP42:PSMA2:USP4:IFIH1:TNFAIP3:UCHL3:INO80:TRAF3:MDM2:MYC:PTRH2:FOXK2:OGT:UBC:USP12:NLRP3:ASXL1:TOMM20:SIAH2:USP7
REACTOME_ACTIVATION_OF_CASPASES_THROUGH_APOPTOSOME_MEDIATED_CLEAVAGE	1	1	6	0.0758882	0.384312	0.415316	CYCS
REACTOME_METHIONINE_SALVAGE_PATHWAY	1	1	6	0.0758882	0.384312	0.415316	GOT1
REACTOME_PRE_NOTCH_PROCESSING_IN_THE_ENDOPLASMIC_RETICULUM	1	1	6	0.0758882	0.384312	0.415316	NOTCH2
REACTOME_VITAMINS	1	1	6	0.0758882	0.384312	0.415316	CYP27B1
REACTOME_SCAVENGING_BY_CLASS_F_RECEPTORS	1	1	6	0.0758882	0.384312	0.415316	HYOU1
REACTOME_SUMO_IS_PROTEOLYTICALLY_PROCESSED	1	1	6	0.0758882	0.384312	0.415316	SENP5
REACTOME_ALPHA_OXIDATION_OF_PHYTANATE	1	1	6	0.0758882	0.384312	0.415316	SLC27A2
REACTOME_PROTON_COUPLED_MONOCARBOXYLATE_TRANSPORT	1	1	6	0.0758882	0.384312	0.415316	SLC16A1
REACTOME_SYNTHESIS_OF_DOLICHYL_PHOSPHATE	1	1	6	0.0758882	0.384312	0.415316	NUS1
REACTOME_UPTAKE_AND_FUNCTION_OF_DIPHTHERIA_TOXIN	1	1	6	0.0758882	0.384312	0.415316	TXNRD1
REACTOME_SENSING_OF_DNA_DOUBLE_STRAND_BREAKS	1	1	6	0.0758882	0.384312	0.415316	KPNA2
REACTOME_SYNTHESIS_OF_WYBUTOSINE_AT_G37_OF_TRNA_PHE	1	1	6	0.0758882	0.384312	0.415316	TYW1
REACTOME_PTK6_REGULATES_CELL_CYCLE	1	1	6	0.0758882	0.384312	0.415316	CCND1
REACTOME_PTK6_PROMOTES_HIF1A_STABILIZATION	1	1	6	0.0758882	0.384312	0.415316	HIF1A
REACTOME_ACTIVATED_NTRK2_SIGNALS_THROUGH_CDK5	1	1	6	0.0758882	0.384312	0.415316	TIAM1
REACTOME_GENE_AND_PROTEIN_EXPRESSION_BY_JAK_STAT_SIGNALING_AFTER_INTERLEUKIN_12_STIMULATION	5	4	38	0.0761767	0.384475	0.415132	IFNG:SOD2:SNRPA1:IL10:HNRNPDL
REACTOME_TRAFFICKING_AND_PROCESSING_OF_ENDOSOMAL_TLR	2	2	13	0.0778915	0.390499	0.40838	UNC93B1:HSP90B1
REACTOME_CYTOCHROME_C_MEDIATED_APOPTOTIC_RESPONSE	2	2	13	0.0778915	0.390499	0.40838	CYCS:DIABLO
REACTOME_CTLA4_INHIBITORY_SIGNALING	3	2	21	0.0794154	0.391591	0.407167	FYN:PPP2CB:YES1
REACTOME_ZBP1_DAI_MEDIATED_INDUCTION_OF_TYPE_I_IFNS	3	2	21	0.0794154	0.391591	0.407167	NFKBIA:NFKB1:RELA
REACTOME_COBALAMIN_CBL_VITAMIN_B12_TRANSPORT_AND_METABOLISM	3	2	21	0.0794154	0.391591	0.407167	ABCC1:MTRR:MMAA
REACTOME_VXPX_CARGO_TARGETING_TO_CILIUM	3	2	21	0.0794154	0.391591	0.407167	EXOC2:ASAP1:ARF4
REACTOME_TP53_REGULATES_TRANSCRIPTION_OF_ADDITIONAL_CELL_CYCLE_GENES_WHOSE_EXACT_ROLE_IN_THE_P53_PATHWAY_REMAIN_UNCERTAIN	3	2	21	0.0794154	0.391591	0.407167	TNKS1BP1:BTG2:PLK3
REACTOME_ACTIVATION_OF_BH3_ONLY_PROTEINS	4	3	30	0.0842455	0.411349	0.38579	PMAIP1:TP53BP2:BCL2L11:BCL2
REACTOME_RAF_ACTIVATION	4	3	30	0.0842455	0.411349	0.38579	MARK3:PPP2CB:KSR1:CAMK2D
REACTOME_REGULATION_OF_TP53_ACTIVITY_THROUGH_ACETYLATION	4	3	30	0.0842455	0.411349	0.38579	CHD4:BRPF1:BRD7:HDAC2
REACTOME_AUTOPHAGY	12	9	109	0.0892984	0.434605	0.361906	ATG5:MAP1LC3A:RHEB:LAMTOR3:PRKAB1:RPTOR:UBC:VPS37A:EEF1A1:VPS37C:TOMM20:TOMM5
REACTOME_SYNTHESIS_OF_BILE_ACIDS_AND_BILE_SALTS_VIA_24_HYDROXYCHOLESTEROL	2	2	14	0.0935215	0.434622	0.361888	SLC27A5:SLC27A2
REACTOME_AKT_PHOSPHORYLATES_TARGETS_IN_THE_CYTOSOL	2	2	14	0.0935215	0.434622	0.361888	CDKN1A:MDM2
REACTOME_SPHINGOLIPID_METABOLISM	10	8	89	0.0923561	0.434622	0.361888	VAPA:OSBP:PRKD3:KDSR:ORMDL2:SMPD2:UGCG:SGPP2:SGPL1:B3GALNT1
REACTOME_CD28_DEPENDENT_PI3K_AKT_SIGNALING	3	2	22	0.0912582	0.434622	0.361888	FYN:MAP3K8:PRR5
REACTOME_DCC_MEDIATED_ATTRACTIVE_SIGNALING	2	2	14	0.0935215	0.434622	0.361888	FYN:TRIO
REACTOME_REGULATION_OF_SIGNALING_BY_CBL	3	2	22	0.0912582	0.434622	0.361888	FYN:UBC:YES1
REACTOME_IRAK1_RECRUITS_IKK_COMPLEX	2	2	14	0.0935215	0.434622	0.361888	UBC:PELI1
REACTOME_TRAF3_DEPENDENT_IRF_ACTIVATION_PATHWAY	2	2	14	0.0935215	0.434622	0.361888	IFIH1:TRAF3
REACTOME_ENDOSOMAL_SORTING_COMPLEX_REQUIRED_FOR_TRANSPORT_ESCRT	4	3	31	0.0942309	0.434622	0.361888	VPS36:UBC:VPS37A:VPS37C
REACTOME_EARLY_PHASE_OF_HIV_LIFE_CYCLE	2	2	14	0.0935215	0.434622	0.361888	KPNA1:LIG4
REACTOME_TRYPTOPHAN_CATABOLISM	2	2	14	0.0935215	0.434622	0.361888	SLC7A5:SLC3A2
REACTOME_METHYLATION	2	2	14	0.0935215	0.434622	0.361888	MTRR:MAT2A
REACTOME_NICOTINATE_METABOLISM	4	3	31	0.0942309	0.434622	0.361888	NAMPT:NT5E:PARP9:PARP14
REACTOME_DEFECTS_IN_COBALAMIN_B12_METABOLISM	2	2	14	0.0935215	0.434622	0.361888	MTRR:MMAA
REACTOME_HSF1_ACTIVATION	4	3	31	0.0942309	0.434622	0.361888	DNAJB6:TNFRSF21:EEF1A1:HSPA6
REACTOME_REPRESSION_OF_WNT_TARGET_GENES	2	2	14	0.0935215	0.434622	0.361888	MYC:TLE3
REACTOME_RUNX3_REGULATES_NOTCH_SIGNALING	2	2	14	0.0935215	0.434622	0.361888	MAMLD1:RBPJ
REACTOME_CHONDROITIN_SULFATE_DERMATAN_SULFATE_METABOLISM	6	4	50	0.0974224	0.437976	0.35855	B4GALT7:CHPF2:CHST3:CHSY1:B3GALT6:AGRN
REACTOME_ACYL_CHAIN_REMODELING_OF_DAG_AND_TAG	1	1	7	0.100802	0.437976	0.35855	DGAT2
REACTOME_PP2A_MEDIATED_DEPHOSPHORYLATION_OF_KEY_METABOLIC_FACTORS	1	1	7	0.100802	0.437976	0.35855	PPP2CB
REACTOME_2_LTR_CIRCLE_FORMATION	1	1	7	0.100802	0.437976	0.35855	LIG4
REACTOME_VITAMIN_B2_RIBOFLAVIN_METABOLISM	1	1	7	0.100802	0.437976	0.35855	RFK
REACTOME_CREB_PHOSPHORYLATION	1	1	7	0.100802	0.437976	0.35855	ATF1
REACTOME_SIGNALING_BY_NOTCH1_T_7_9_NOTCH1:M1580_K2555_TRANSLOCATION_MUTANT	1	1	7	0.100802	0.437976	0.35855	ADAM17
REACTOME_LOSS_OF_FUNCTION_OF_TGFBR1_IN_CANCER	1	1	7	0.100802	0.437976	0.35855	ZFYVE9
REACTOME_CATION_COUPLED_CHLORIDE_COTRANSPORTERS	1	1	7	0.100802	0.437976	0.35855	SLC12A2
REACTOME_POST_TRANSCRIPTIONAL_SILENCING_BY_SMALL_RNAS	1	1	7	0.100802	0.437976	0.35855	AGO2
REACTOME_NEUROFASCIN_INTERACTIONS	1	1	7	0.100802	0.437976	0.35855	SDCBP
REACTOME_APEX1_INDEPENDENT_RESOLUTION_OF_AP_SITES_VIA_THE_SINGLE_NUCLEOTIDE_REPLACEMENT_PATHWAY	1	1	7	0.100802	0.437976	0.35855	LIG3
REACTOME_MAPK_FAMILY_SIGNALING_CASCADES	29	24	296	0.0962582	0.437976	0.35855	FYN:CUL3:PSME4:MAPK6:MARK3:APBB1IP:MAPKAPK5:PSMA6:PPP2CB:PSMA2:LAMTOR3:IL2:DUSP4:AGO2:IL2RA:MYC:DUSP5:DUSP6:KSR1:CAMK2D:IL2RG:CDC42EP2:UBC:DUSP2:PEA15:CDC42EP3:IL3:CSF2:PDGFA
REACTOME_WAX_AND_PLASMALOGEN_BIOSYNTHESIS	1	1	7	0.100802	0.437976	0.35855	FAR1
REACTOME_ARYL_HYDROCARBON_RECEPTOR_SIGNALLING	1	1	7	0.100802	0.437976	0.35855	AHR
REACTOME_RUNX1_REGULATES_TRANSCRIPTION_OF_GENES_INVOLVED_IN_DIFFERENTIATION_OF_MYELOID_CELLS	1	1	7	0.100802	0.437976	0.35855	CSF2
REACTOME_RUNX3_REGULATES_CDKN1A_TRANSCRIPTION	1	1	7	0.100802	0.437976	0.35855	CDKN1A
REACTOME_ERYTHROPOIETIN_ACTIVATES_STAT5	1	1	7	0.100802	0.437976	0.35855	STAT5A
REACTOME_ACTIVATED_NTRK2_SIGNALS_THROUGH_FYN	1	1	7	0.100802	0.437976	0.35855	FYN
REACTOME_STAT5_ACTIVATION	1	1	7	0.100802	0.437976	0.35855	STAT5A
REACTOME_DISEASES_ASSOCIATED_WITH_GLYCOSAMINOGLYCAN_METABOLISM	5	4	41	0.10192	0.440282	0.356269	B4GALT7:CHST3:CHSY1:B3GALT6:AGRN
REACTOME_DUAL_INCISION_IN_GG_NER	5	4	41	0.10192	0.440282	0.356269	ERCC1:POLE4:CHD1L:CUL4A:UBC
REACTOME_TRANSLOCATION_OF_ZAP_70_TO_IMMUNOLOGICAL_SYNAPSE	3	2	23	0.103888	0.443668	0.352942	PTPN22:TRAV8-4:TRAV19
REACTOME_DOPAMINE_NEUROTRANSMITTER_RELEASE_CYCLE	3	2	23	0.103888	0.443668	0.352942	STX1A:PPFIA1:LIN7C
REACTOME_DOWNREGULATION_OF_SMAD2_3:SMAD4_TRANSCRIPTIONAL_ACTIVITY	3	2	23	0.103888	0.443668	0.352942	UBE2D1:UBE2D3:UBC
REACTOME_GOLGI_TO_ER_RETROGRADE_TRANSPORT	14	11	133	0.103882	0.443668	0.352942	TMED2:KIF9:ARFGAP1:NAPG:TMED7:KDELR2:GALNT1:SURF4:ARF4:TMED10:TMED9:BICD2:ARFGAP3:SEC22B
REACTOME_TGF_BETA_RECEPTOR_SIGNALING_ACTIVATES_SMADS	4	3	32	0.10479	0.446251	0.350421	PPP1R15A:FURIN:UBC:ZFYVE9
REACTOME_DOWNSTREAM_SIGNALING_EVENTS_OF_B_CELL_RECEPTOR_BCR	9	7	81	0.105794	0.447979	0.348743	PSME4:PSMA6:NFKBIA:PSMA2:NFKB1:SKP1:UBC:REL:RELA
REACTOME_ONCOGENIC_MAPK_SIGNALING	9	7	81	0.105794	0.447979	0.348743	CLCN6:MARK3:APBB1IP:QKI:KSR1:CAMK2D:BCL2L11:LMNA:TRAK1
REACTOME_DEFECTIVE_CFTR_CAUSES_CYSTIC_FIBROSIS	7	5	61	0.107003	0.451823	0.345031	PSME4:SEL1L:DERL2:DERL3:PSMA6:PSMA2:UBC
REACTOME_SIGNALING_BY_TGF_BETA_FAMILY_MEMBERS	11	9	102	0.107697	0.453475	0.343447	UBE2D1:PPP1R15A:UBE2D3:CCNT1:E2F5:ACVR1B:MYC:FURIN:UBC:ZFYVE9:JUNB
REACTOME_PROLACTIN_RECEPTOR_SIGNALING	2	2	15	0.110315	0.458069	0.339069	SKP1:STAT5A
REACTOME_SIGNALING_BY_NOTCH1_HD_DOMAIN_MUTANTS_IN_CANCER	2	2	15	0.110315	0.458069	0.339069	UBC:ADAM17
REACTOME_PHOSPHORYLATION_SITE_MUTANTS_OF_CTNNB1_ARE_NOT_TARGETED_TO_THE_PROTEASOME_BY_THE_DESTRUCTION_COMPLEX	2	2	15	0.110315	0.458069	0.339069	PPP2CB:CSNK1A1
REACTOME_REGULATION_OF_TP53_ACTIVITY_THROUGH_PHOSPHORYLATION	10	8	92	0.110251	0.458069	0.339069	MAPKAPK5:PRKAB1:MDM2:TAF4B:UBC:WRN:PLK3:TAF13:TAF15:TAF9
REACTOME_PENTOSE_PHOSPHATE_PATHWAY	2	2	15	0.110315	0.458069	0.339069	RPIA:RPE
REACTOME_INFLUENZA_INFECTION	16	13	156	0.111035	0.459785	0.337445	DNAJC3:RPL18A:KPNA1:RPL21:RPS10:RPL7:RANBP2:RPL26:RPL9:RPL36AL:KPNA2:KPNA4:RPS26:RPL41:RPL36A:RPL17
REACTOME_ACTIVATION_OF_GENE_EXPRESSION_BY_SREBF_SREBP	5	4	42	0.111397	0.460013	0.33723	NFYA:HMGCS1:HMGCR:TGS1:MTF1
REACTOME_REGULATION_OF_HSF1_MEDIATED_HEAT_SHOCK_RESPONSE	9	7	82	0.112445	0.463064	0.334359	HSPA5:DNAJC2:DNAJB6:BAG1:HSPA2:TNFRSF21:RANBP2:HSPA13:HSPA6
REACTOME_SYNTHESIS_OF_BILE_ACIDS_AND_BILE_SALTS	4	3	34	0.127553	0.466296	0.331339	OSBPL3:SLC27A5:OSBP:SLC27A2
REACTOME_SIGNALING_BY_SCF_KIT	5	4	43	0.121306	0.466296	0.331339	FYN:SH2B3:STAT5A:YES1:SOCS1
REACTOME_SPRY_REGULATION_OF_FGF_SIGNALING	2	2	16	0.128161	0.466296	0.331339	PPP2CB:UBC
REACTOME_GLUTAMATE_NEUROTRANSMITTER_RELEASE_CYCLE	3	2	24	0.117264	0.466296	0.331339	STX1A:GLS:PPFIA1
REACTOME_TRANSPORT_OF_MATURE_TRANSCRIPT_TO_CYTOPLASM	9	7	84	0.126438	0.466296	0.331339	THOC1:NCBP2:SRSF7:SRSF6:THOC2:NXT1:EIF4E:RANBP2:RBM8A
REACTOME_NUCLEOTIDE_LIKE_PURINERGIC_RECEPTORS	2	2	16	0.128161	0.466296	0.331339	ADORA2B:P2RY11
REACTOME_CD28_CO_STIMULATION	4	3	33	0.115905	0.466296	0.331339	FYN:MAP3K8:YES1:PRR5
REACTOME_SEMA3A_PAK_DEPENDENT_AXON_REPULSION	2	2	16	0.128161	0.466296	0.331339	FYN:PLXNA1
REACTOME_SYNTHESIS_OF_SUBSTRATES_IN_N_GLYCAN_BIOSYTHESIS	7	5	63	0.122973	0.466296	0.331339	NANS:UAP1:ALG5:NPL:PMM2:NUS1:GNE
REACTOME_TRANSCRIPTIONAL_REGULATION_OF_WHITE_ADIPOCYTE_DIFFERENTIATION	9	7	84	0.126438	0.466296	0.331339	NFKB1:EGR2:MED4:TGS1:MED9:MED19:RELA:LPL:TNF
REACTOME_SYNTHESIS_OF_VERY_LONG_CHAIN_FATTY_ACYL_COAS	3	2	24	0.117264	0.466296	0.331339	ACSL4:ACSL1:ACSL5
REACTOME_CYTOSOLIC_SULFONATION_OF_SMALL_MOLECULES	3	2	24	0.117264	0.466296	0.331339	IMPAD1:PODXL2:TPST2
REACTOME_APOPTOTIC_FACTOR_MEDIATED_RESPONSE	2	2	16	0.128161	0.466296	0.331339	CYCS:DIABLO
REACTOME_ELEVATION_OF_CYTOSOLIC_CA2PLUS_LEVELS	2	2	16	0.128161	0.466296	0.331339	P2RX7:ITPR1
REACTOME_SYNTHESIS_OF_PG	1	1	8	0.127569	0.466296	0.331339	PLD6
REACTOME_MITOCHONDRIAL_BIOGENESIS	10	8	94	0.123217	0.466296	0.331339	GABPB1:TFAM:PRKAB1:SOD2:NR1D1:TGS1:PPRC1:CHCHD6:TFB2M:CYCS
REACTOME_NEF_AND_SIGNAL_TRANSDUCTION	1	1	8	0.127569	0.466296	0.331339	FYN
REACTOME_TRANSCRIPTION_OF_THE_HIV_GENOME	8	6	73	0.121537	0.466296	0.331339	RNMT:ELL:NCBP2:CCNT1:TAF4B:TAF13:TAF15:TAF9
REACTOME_DEGRADATION_OF_BETA_CATENIN_BY_THE_DESTRUCTION_COMPLEX	9	7	84	0.126438	0.466296	0.331339	PSME4:PSMA6:PPP2CB:PSMA2:SKP1:CSNK1A1:MYC:TLE3:UBC
REACTOME_COENZYME_A_BIOSYNTHESIS	1	1	8	0.127569	0.466296	0.331339	PANK3
REACTOME_VITAMIN_C_ASCORBATE_METABOLISM	1	1	8	0.127569	0.466296	0.331339	SLC23A2
REACTOME_LINOLEIC_ACID_LA_METABOLISM	1	1	8	0.127569	0.466296	0.331339	ACSL1
REACTOME_REGULATION_OF_GENE_EXPRESSION_IN_LATE_STAGE_BRANCHING_MORPHOGENESIS_PANCREATIC_BUD_PRECURSOR_CELLS	2	2	16	0.128161	0.466296	0.331339	MAMLD1:RBPJ
REACTOME_SIGNALING_BY_TGF_BETA_RECEPTOR_COMPLEX_IN_CANCER	1	1	8	0.127569	0.466296	0.331339	ZFYVE9
REACTOME_GLYCOGEN_SYNTHESIS	2	2	16	0.128161	0.466296	0.331339	UBC:PGM2L1
REACTOME_DEFECTIVE_CHST3_CAUSES_SEDCJD	1	1	8	0.127569	0.466296	0.331339	CHST3
REACTOME_DEFECTIVE_CHSY1_CAUSES_TPBS	1	1	8	0.127569	0.466296	0.331339	CHSY1
REACTOME_BINDING_OF_TCF_LEF:CTNNB1_TO_TARGET_GENE_PROMOTERS	1	1	8	0.127569	0.466296	0.331339	MYC
REACTOME_FORMYL_PEPTIDE_RECEPTORS_BIND_FORMYL_PEPTIDES_AND_MANY_OTHER_LIGANDS	1	1	8	0.127569	0.466296	0.331339	APP
REACTOME_SYNTHESIS_OF_UDP_N_ACETYL_GLUCOSAMINE	1	1	8	0.127569	0.466296	0.331339	UAP1
REACTOME_REGULATION_OF_CYTOSKELETAL_REMODELING_AND_CELL_SPREADING_BY_IPP_COMPLEX_COMPONENTS	1	1	8	0.127569	0.466296	0.331339	TESK1
REACTOME_HUR_ELAVL1_BINDS_AND_STABILIZES_MRNA	1	1	8	0.127569	0.466296	0.331339	PRKCD
REACTOME_SUMOYLATION_OF_DNA_METHYLATION_PROTEINS	2	2	16	0.128161	0.466296	0.331339	PHC2:BMI1
REACTOME_RELEASE_OF_HH_NP_FROM_THE_SECRETING_CELL	1	1	8	0.127569	0.466296	0.331339	ADAM17
REACTOME_DECTIN_1_MEDIATED_NONCANONICAL_NF_KB_SIGNALING	7	5	62	0.114838	0.466296	0.331339	PSME4:PSMA6:RELB:PSMA2:SKP1:UBC:RELA
REACTOME_TP53_REGULATES_METABOLIC_GENES	9	7	84	0.126438	0.466296	0.331339	RHEB:LAMTOR3:PRKAB1:GLS:AGO2:SESN2:RPTOR:CYCS:TXNRD1
REACTOME_MAPK6_MAPK4_SIGNALING	10	8	93	0.116632	0.466296	0.331339	PSME4:MAPK6:MAPKAPK5:PSMA6:PSMA2:AGO2:MYC:CDC42EP2:UBC:CDC42EP3
REACTOME_RRNA_MODIFICATION_IN_THE_MITOCHONDRION	1	1	8	0.127569	0.466296	0.331339	NSUN4
REACTOME_DNA_REPLICATION_INITIATION	1	1	8	0.127569	0.466296	0.331339	POLE4
REACTOME_RECYCLING_OF_EIF2:GDP	1	1	8	0.127569	0.466296	0.331339	EIF2B4
REACTOME_PHOSPHATE_BOND_HYDROLYSIS_BY_NTPDASE_PROTEINS	1	1	8	0.127569	0.466296	0.331339	ENTPD7
REACTOME_TRANSCRIPTIONAL_REGULATION_BY_RUNX1	23	19	237	0.126755	0.466296	0.331339	PSME4:SETD1A:PSMA6:CDK6:PSMA2:IL2:CCND1:IFNG:MYB:NR4A3:AGO2:SMARCA4:IL2RA:PHC2:UBC:RYBP:IL3:CSF2:BMI1:SOCS4:PCGF5:SOCS3:TNFRSF18
REACTOME_COMPETING_ENDOGENOUS_RNAS_CERNAS_REGULATE_PTEN_TRANSLATION	1	1	8	0.127569	0.466296	0.331339	AGO2
REACTOME_RUNX3_REGULATES_YAP1_MEDIATED_TRANSCRIPTION	1	1	8	0.127569	0.466296	0.331339	TEAD3
REACTOME_TRANSCRIPTIONAL_REGULATION_BY_E2F6	4	3	34	0.127553	0.466296	0.331339	RYBP:BMI1:E2F6:MGA
REACTOME_CELLULAR_RESPONSES_TO_EXTERNAL_STIMULI	49	43	535	0.12238	0.466296	0.331339	MAP2K3:HSPA5:ATG5:MAP2K4:PSME4:UBE2D1:MAPKAPK5:HIF1A:PSMA6:MAP1LC3A:CDK6:DNAJC2:DNAJB6:PSMA2:RHEB:BAG1:LAMTOR3:NFKB1:UBE2D3:PRKAB1:SOD2:VEGFA:CDKN1A:MT1G:MT2A:HSPA2:KDM6B:PHC2:MDM2:RPTOR:CAMK2D:TNFRSF21:UBC:RANBP2:HSPA13:EEF1A1:ETS2:BMI1:MT1E:FOS:CYCS:RELA:HSPA6:TOMM20:TOMM5:EP400:MT1X:MTF1:TXNRD1
REACTOME_CHAPERONE_MEDIATED_AUTOPHAGY	2	2	16	0.128161	0.466296	0.331339	PRKAB1:EEF1A1
REACTOME_ESTROGEN_DEPENDENT_NUCLEAR_EVENTS_DOWNSTREAM_OF_ESR_MEMBRANE_SIGNALING	3	2	24	0.117264	0.466296	0.331339	CCND1:FOS:BCL2
REACTOME_DISEASES_OF_SIGNAL_TRANSDUCTION	36	31	386	0.128949	0.468024	0.329732	FYN:CLCN6:MAMLD1:PSME4:SEL1L:DERL2:MARK3:APBB1IP:PSMA6:PPP2CB:PSMA2:FBXW7:QKI:SKP1:CSNK1A1:NCBP2:NR4A1:CDKN1A:LRRFIP1:STAT5A:MDM2:MYC:KSR1:CAMK2D:UBC:ADAM17:BCL2L11:ZFYVE9:LMNA:SYVN1:ICOS:RBPJ:TRAK1:PRR5:HDAC2:PDGFA
REACTOME_GAP_FILLING_DNA_REPAIR_SYNTHESIS_AND_LIGATION_IN_GG_NER	3	2	25	0.131343	0.475563	0.322792	LIG3:POLE4:UBC
REACTOME_ADAPTIVE_IMMUNE_SYSTEM	72	65	811	0.13274	0.47831	0.320291	FYN:RNF19A:CUL3:HSPA5:TAB2:PSME4:CLEC2D:NEDD4:UBE2D1:UBA5:CD200:TRIM9:PSMA6:NFKBIA:CD40LG:FBXO31:PPP2CB:PSMA2:SEC61B:MAP3K8:BLMH:NFKB1:UBE2D3:FBXW7:CD81:ULBP1:ITK:RNF130:SKP1:SEC24A:UBE3A:CBLB:UBE3D:AREL1:CD274:VASP:LRRC41:SEC61G:PTPN22:SEC31A:CD226:UBC:ITPR1:TRIP12:LONRF1:UBR1:ICOSLG:KLHL21:REL:KBTBD8:ICOS:DTX3L:HECTD2:CUL5:B2M:PDIA3:RELA:GLMN:UBE2O:YES1:SIAH2:UBE2E2:SOCS3:UBE2G2:SOCS1:BTLA:PRR5…
REACTOME_SIGNALING_BY_NON_RECEPTOR_TYROSINE_KINASES	6	5	54	0.132447	0.47831	0.320291	HIF1A:CCND1:SFPQ:PELP1:UBC:SOCS3
REACTOME_CELLULAR_RESPONSE_TO_HYPOXIA	8	6	75	0.137224	0.493283	0.306904	PSME4:UBE2D1:HIF1A:PSMA6:PSMA2:UBE2D3:VEGFA:UBC
REACTOME_ONCOGENE_INDUCED_SENESCENCE	4	3	35	0.139712	0.501026	0.30014	CDK6:MDM2:UBC:ETS2
REACTOME_C_TYPE_LECTIN_RECEPTORS_CLRS	14	12	140	0.142046	0.50818	0.293983	FYN:TAB2:PSME4:UBE2D1:PSMA6:NFKBIA:RELB:PSMA2:NFKB1:SKP1:UBC:ITPR1:PRKCD:RELA
REACTOME_DOWNREGULATION_OF_TGF_BETA_RECEPTOR_SIGNALING	3	3	26	0.146078	0.514648	0.288489	PPP1R15A:UBC:ZFYVE9
REACTOME_A_TETRASACCHARIDE_LINKER_SEQUENCE_IS_REQUIRED_FOR_GAG_SYNTHESIS	3	3	26	0.146078	0.514648	0.288489	B4GALT7:B3GALT6:AGRN
REACTOME_PHOSPHORYLATION_OF_CD3_AND_TCR_ZETA_CHAINS	3	3	26	0.146078	0.514648	0.288489	PTPN22:TRAV8-4:TRAV19
REACTOME_ACETYLCHOLINE_NEUROTRANSMITTER_RELEASE_CYCLE	2	2	17	0.146944	0.514648	0.288489	STX1A:PPFIA1
REACTOME_BETA_CATENIN_PHOSPHORYLATION_CASCADE	2	2	17	0.146944	0.514648	0.288489	PPP2CB:CSNK1A1
REACTOME_FORMATION_OF_SENESCENCE_ASSOCIATED_HETEROCHROMATIN_FOCI_SAHF	2	2	17	0.146944	0.514648	0.288489	CDKN1A:EP400
REACTOME_DISEASES_ASSOCIATED_WITH_N_GLYCOSYLATION_OF_PROTEINS	2	2	17	0.146944	0.514648	0.288489	ALG2:MGAT2
REACTOME_KSRP_KHSRP_BINDS_AND_DESTABILIZES_MRNA	2	2	17	0.146944	0.514648	0.288489	EXOSC7:EXOSC6
REACTOME_FOXO_MEDIATED_TRANSCRIPTION_OF_CELL_CYCLE_GENES	2	2	17	0.146944	0.514648	0.288489	GADD45A:CDKN1A
REACTOME_HIV_LIFE_CYCLE	15	13	152	0.147887	0.516741	0.286727	RNMT:ELL:KPNA1:NCBP2:CCNT1:FURIN:TAF4B:UBC:RANBP2:VPS37A:VPS37C:LIG4:TAF13:TAF15:TAF9
REACTOME_REGULATION_OF_MRNA_STABILITY_BY_PROTEINS_THAT_BIND_AU_RICH_ELEMENTS	9	7	87	0.149103	0.51978	0.284181	PSME4:EXOSC7:PSMA6:PSMA2:UBC:PRKCD:ZFP36L1:EXOSC6:DCP1A
REACTOME_PROSTANOID_LIGAND_RECEPTORS	1	1	9	0.155741	0.521106	0.283074	PTGER4
REACTOME_OPSINS	1	1	9	0.155741	0.521106	0.283074	RRH
REACTOME_DISPLACEMENT_OF_DNA_GLYCOSYLASE_BY_APEX1	1	1	9	0.155741	0.521106	0.283074	TDG
REACTOME_ACTIVATION_OF_PUMA_AND_TRANSLOCATION_TO_MITOCHONDRIA	1	1	9	0.155741	0.521106	0.283074	TP53BP2
REACTOME_GLUCOCORTICOID_BIOSYNTHESIS	1	1	9	0.155741	0.521106	0.283074	HSD11B2
REACTOME_SHC_RELATED_EVENTS_TRIGGERED_BY_IGF1R	1	1	9	0.155741	0.521106	0.283074	IGF2
REACTOME_MYOCLONIC_EPILEPSY_OF_LAFORA	1	1	9	0.155741	0.521106	0.283074	UBC
REACTOME_METABOLIC_DISORDERS_OF_BIOLOGICAL_OXIDATION_ENZYMES	4	3	36	0.152356	0.521106	0.283074	GCLC:GCLM:CYP27B1:FDX1
REACTOME_ABC_TRANSPORTER_DISORDERS	8	7	77	0.153901	0.521106	0.283074	PSME4:SEL1L:DERL2:DERL3:PSMA6:PSMA2:ABCB6:UBC
REACTOME_RHO_GTPASES_ACTIVATE_RHOTEKIN_AND_RHOPHILINS	1	1	9	0.155741	0.521106	0.283074	RHOB
REACTOME_HIGHLY_CALCIUM_PERMEABLE_NICOTINIC_ACETYLCHOLINE_RECEPTORS	1	1	9	0.155741	0.521106	0.283074	CHRNA6
REACTOME_TRANSPORT_OF_NUCLEOTIDE_SUGARS	1	1	9	0.155741	0.521106	0.283074	SLC35A2
REACTOME_PTK6_REGULATES_RTKS_AND_THEIR_EFFECTORS_AKT1_AND_DOK1	1	1	9	0.155741	0.521106	0.283074	UBC
REACTOME_REGULATION_OF_PTEN_MRNA_TRANSLATION	1	1	9	0.155741	0.521106	0.283074	AGO2
REACTOME_OAS_ANTIVIRAL_RESPONSE	1	1	9	0.155741	0.521106	0.283074	PDE12
REACTOME_INTERLEUKIN_23_SIGNALING	1	1	9	0.155741	0.521106	0.283074	IL23A
REACTOME_LIPOPHAGY	1	1	9	0.155741	0.521106	0.283074	PRKAB1
REACTOME_SERINE_BIOSYNTHESIS	1	1	9	0.155741	0.521106	0.283074	PSAT1
REACTOME_METABOLISM_OF_AMINO_ACIDS_AND_DERIVATIVES	34	30	372	0.162272	0.534496	0.272055	SARS:ALDH18A1:BCAT1:PSME4:ASNS:PSMA6:SLC7A5:RPL18A:PSMA2:GLS:GOT1:RPL21:AMD1:MTRR:RPS10:LARS:PSAT1:GLUL:RPL7:RPL26:RPL9:AIMP1:RPL36AL:GPT2:MARS:SLC3A2:NQO1:ADO:IARS:RPS26:TXNRD1:RPL41:RPL36A:RPL17
REACTOME_BIOSYNTHESIS_OF_THE_N_GLYCAN_PRECURSOR_DOLICHOL_LIPID_LINKED_OLIGOSACCHARIDE_LLO_AND_TRANSFER_TO_A_NASCENT_PROTEIN	8	7	78	0.162595	0.534496	0.272055	NANS:UAP1:ALG2:ALG5:NPL:PMM2:NUS1:GNE
REACTOME_BMAL1:CLOCK_NPAS2_ACTIVATES_CIRCADIAN_GENE_EXPRESSION	3	3	27	0.161418	0.534496	0.272055	NAMPT:CLOCK:TGS1
REACTOME_INSULIN_PROCESSING	3	3	27	0.161418	0.534496	0.272055	RAB27A:STX1A:EXOC2
REACTOME_PD_1_SIGNALING	3	3	27	0.161418	0.534496	0.272055	CD274:TRAV8-4:TRAV19
REACTOME_INTERLEUKIN_12_FAMILY_SIGNALING	6	5	57	0.162264	0.534496	0.272055	IL23A:IFNG:SOD2:SNRPA1:IL10:HNRNPDL
REACTOME_DEGRADATION_OF_DVL	6	5	57	0.162264	0.534496	0.272055	CUL3:PSME4:PSMA6:PSMA2:DVL1:UBC
REACTOME_RESPONSE_TO_ELEVATED_PLATELET_CYTOSOLIC_CA2PLUS	13	11	132	0.160859	0.534496	0.272055	HSPA5:PHACTR2:VEGFA:SRGN:ABCC4:APP:MANF:CD109:IGF2:CHID1:FAM3C:PDGFA:F5
REACTOME_GENERATION_OF_SECOND_MESSENGER_MOLECULES	4	3	37	0.165455	0.538053	0.269175	ITK:VASP:TRAV8-4:TRAV19
REACTOME_NOREPINEPHRINE_NEUROTRANSMITTER_RELEASE_CYCLE	2	2	18	0.166549	0.538053	0.269175	STX1A:PPFIA1
REACTOME_CELL_EXTRACELLULAR_MATRIX_INTERACTIONS	2	2	18	0.166549	0.538053	0.269175	TESK1:VASP
REACTOME_HIV_INFECTION	22	19	234	0.165144	0.538053	0.269175	FYN:PSME4:PSMA6:RNMT:ELL:PSMA2:SKP1:KPNA1:NCBP2:CCNT1:FURIN:TAF4B:UBC:RANBP2:VPS37A:CUL5:B2M:VPS37C:LIG4:TAF13:TAF15:TAF9
REACTOME_SEROTONIN_NEUROTRANSMITTER_RELEASE_CYCLE	2	2	18	0.166549	0.538053	0.269175	STX1A:PPFIA1
REACTOME_SIGNALING_BY_CYTOSOLIC_FGFR1_FUSION_MUTANTS	2	2	18	0.166549	0.538053	0.269175	LRRFIP1:STAT5A
REACTOME_NEDDYLATION	22	19	234	0.165144	0.538053	0.269175	CUL3:PSME4:UBE2D1:HIF1A:PSMA6:FBXO31:PSMA2:UBE2D3:FBXW7:SKP1:UCHL3:DCAF4:SOCS2:LRRC41:CUL4A:COMMD10:UBC:KLHL21:KBTBD8:CUL5:SOCS3:GAN
REACTOME_INTERLEUKIN_12_SIGNALING	5	4	47	0.164973	0.538053	0.269175	IFNG:SOD2:SNRPA1:IL10:HNRNPDL
REACTOME_MACROAUTOPHAGY	9	8	90	0.17368	0.559884	0.251902	ATG5:MAP1LC3A:RHEB:LAMTOR3:PRKAB1:RPTOR:UBC:TOMM20:TOMM5
REACTOME_SULFUR_AMINO_ACID_METABOLISM	3	3	28	0.177312	0.567928	0.245706	GOT1:MTRR:ADO
REACTOME_BUDDING_AND_MATURATION_OF_HIV_VIRION	3	3	28	0.177312	0.567928	0.245706	UBC:VPS37A:VPS37C
REACTOME_MICROAUTOPHAGY	3	3	28	0.177312	0.567928	0.245706	PRKAB1:VPS37A:VPS37C
REACTOME_NEF_MEDIATED_DOWNREGULATION_OF_MHC_CLASS_I_COMPLEX_CELL_SURFACE_EXPRESSION	1	1	10	0.184928	0.570384	0.243833	B2M
REACTOME_REMOVAL_OF_AMINOTERMINAL_PROPEPTIDES_FROM_GAMMA_CARBOXYLATED_PROTEINS	1	1	10	0.184928	0.570384	0.243833	FURIN
REACTOME_NEUROTOXICITY_OF_CLOSTRIDIUM_TOXINS	1	1	10	0.184928	0.570384	0.243833	STX1A
REACTOME_AKT_PHOSPHORYLATES_TARGETS_IN_THE_NUCLEUS	1	1	10	0.184928	0.570384	0.243833	NR4A1
REACTOME_ACTIVATION_OF_PPARGC1A_PGC_1ALPHA_BY_PHOSPHORYLATION	1	1	10	0.184928	0.570384	0.243833	PRKAB1
REACTOME_MASTL_FACILITATES_MITOTIC_PROGRESSION	1	1	10	0.184928	0.570384	0.243833	PPP2CB
REACTOME_PROCESSING_AND_ACTIVATION_OF_SUMO	1	1	10	0.184928	0.570384	0.243833	SENP5
REACTOME_CALCITONIN_LIKE_LIGAND_RECEPTORS	1	1	10	0.184928	0.570384	0.243833	ADM2
REACTOME_ACTIVATION_OF_THE_AP_1_FAMILY_OF_TRANSCRIPTION_FACTORS	1	1	10	0.184928	0.570384	0.243833	FOS
REACTOME_HDR_THROUGH_MMEJ_ALT_NHEJ	1	1	10	0.184928	0.570384	0.243833	LIG3
REACTOME_UCH_PROTEINASES	10	9	102	0.182929	0.570384	0.243833	PSME4:PSMA6:ACTR5:PSMA2:UCHL3:INO80:FOXK2:OGT:UBC:ASXL1
REACTOME_DNA_DAMAGE_RECOGNITION_IN_GG_NER	4	4	38	0.178982	0.570384	0.243833	ACTR5:INO80:CUL4A:UBC
REACTOME_TRNA_PROCESSING_IN_THE_NUCLEUS	6	5	59	0.183668	0.570384	0.243833	TRNT1:RPP40:RPP38:RANBP2:TSEN2:XPOT
REACTOME_MRNA_EDITING	1	1	10	0.184928	0.570384	0.243833	ADARB1
REACTOME_TRANSCRIPTIONAL_REGULATION_BY_THE_AP_2_TFAP2_FAMILY_OF_TRANSCRIPTION_FACTORS	4	4	38	0.178982	0.570384	0.243833	VEGFA:KDM5B:CDKN1A:MYC
REACTOME_MET_RECEPTOR_RECYCLING	1	1	10	0.184928	0.570384	0.243833	GGA3
REACTOME_CHYLOMICRON_REMODELING	1	1	10	0.184928	0.570384	0.243833	LPL
REACTOME_REACTIONS_SPECIFIC_TO_THE_COMPLEX_N_GLYCAN_SYNTHESIS_PATHWAY	1	1	10	0.184928	0.570384	0.243833	MGAT2
REACTOME_OTHER_SEMAPHORIN_INTERACTIONS	2	2	19	0.18686	0.570475	0.243763	PLXNA1:SEMA7A
REACTOME_TRANSCRIPTION_OF_E2F_TARGETS_UNDER_NEGATIVE_CONTROL_BY_DREAM_COMPLEX	2	2	19	0.18686	0.570475	0.243763	E2F5:MYC
REACTOME_SCAVENGING_BY_CLASS_A_RECEPTORS	2	2	19	0.18686	0.570475	0.243763	HSP90B1:FTH1
REACTOME_EPHRIN_SIGNALING	2	2	19	0.18686	0.570475	0.243763	FYN:SDCBP
REACTOME_ASSEMBLY_OF_ACTIVE_LPL_AND_LIPC_LIPASE_COMPLEXES	2	2	19	0.18686	0.570475	0.243763	FURIN:LPL
REACTOME_SIGNALING_BY_ERBB2	5	4	49	0.188989	0.574633	0.240609	FYN:UBC:PRKCD:CUL5:YES1
REACTOME_TP53_REGULATES_TRANSCRIPTION_OF_CELL_CYCLE_GENES	5	4	49	0.188989	0.574633	0.240609	GADD45A:CDKN1A:TNKS1BP1:BTG2:PLK3
REACTOME_ABC_FAMILY_PROTEINS_MEDIATED_TRANSPORT	10	9	103	0.191214	0.580221	0.236406	PSME4:SEL1L:DERL2:DERL3:PSMA6:ABCC1:PSMA2:ABCB6:ABCC4:UBC
REACTOME_SYNTHESIS_OF_PA	4	4	39	0.192906	0.582997	0.234334	PLA2G12A:GPD1L:AGPAT5:PLD6
REACTOME_GAMMA_CARBOXYLATION_HYPUSINE_FORMATION_AND_ARYLSULFATASE_ACTIVATION	4	4	39	0.192906	0.582997	0.234334	DPH2:FURIN:DPH3:EIF5A2
REACTOME_SCF_SKP2_MEDIATED_DEGRADATION_OF_P27_P21	6	5	60	0.194788	0.587499	0.230993	PSMA6:PSMA2:CCND1:SKP1:CDKN1A:UBC
REACTOME_SIGNALING_BY_NOTCH4	8	7	82	0.199587	0.600765	0.221296	MAMLD1:PSMA6:PSMA2:FBXW7:SKP1:NOTCH2:UBC:RBPJ
REACTOME_SIGNALING_BY_ROBO_RECEPTORS	20	18	218	0.203073	0.610034	0.214646	PSME4:PSMA6:GSPT1:RPL18A:PSMA2:NCBP2:ETF1:RPL21:RPS10:VASP:RPL7:UBC:RPL26:RPL9:RPL36AL:RPS26:RPL41:RPL36A:RBM8A:RPL17
REACTOME_OTHER_INTERLEUKIN_SIGNALING	26	23	288	0.204479	0.613028	0.21252	FYN:CUL3:PSME4:MARK3:APBB1IP:PSMA6:PPP2CB:STX1A:PSMA2:LAMTOR3:IL2:DUSP4:STAT5A:IL2RA:DUSP5:DUSP6:KSR1:CAMK2D:IL2RG:UBC:DUSP2:PEA15:IL3:CSF2:CSF1:PDGFA
REACTOME_SIGNALING_BY_NODAL	2	2	20	0.207766	0.614282	0.211632	ACVR1B:FURIN
REACTOME_SIGNALING_BY_HIPPO	2	2	20	0.207766	0.614282	0.211632	STK4:NPHP4
REACTOME_DEFECTIVE_B4GALT7_CAUSES_EDS_PROGEROID_TYPE	2	2	20	0.207766	0.614282	0.211632	B4GALT7:AGRN
REACTOME_MAP2K_AND_MAPK_ACTIVATION	4	4	40	0.207195	0.614282	0.211632	MARK3:APBB1IP:LAMTOR3:KSR1
REACTOME_TP53_REGULATES_TRANSCRIPTION_OF_GENES_INVOLVED_IN_CYTOCHROME_C_RELEASE	2	2	20	0.207766	0.614282	0.211632	PMAIP1:TP53BP2
REACTOME_LISTERIA_MONOCYTOGENES_ENTRY_INTO_HOST_CELLS	2	2	20	0.207766	0.614282	0.211632	CBLL1:UBC
REACTOME_CLASS_I_PEROXISOMAL_MEMBRANE_PROTEIN_IMPORT	2	2	20	0.207766	0.614282	0.211632	ATAD1:PEX26
REACTOME_GLYCOLYSIS	7	6	72	0.208513	0.615279	0.210928	PFKP:PPP2CB:GCK:PFKFB2:RANBP2:ADPGK:PGM2L1
REACTOME_RECOGNITION_OF_DNA_DAMAGE_BY_PCNA_CONTAINING_REPLICATION_COMPLEX	3	3	30	0.210546	0.61884	0.208422	POLE4:CUL4A:UBC
REACTOME_FOXO_MEDIATED_TRANSCRIPTION_OF_OXIDATIVE_STRESS_METABOLIC_AND_NEURONAL_GENES	3	3	30	0.210546	0.61884	0.208422	GCK:SOD2:HDAC2
REACTOME_ENDOSOMAL_VACUOLAR_PATHWAY	1	1	11	0.214792	0.620373	0.207347	B2M
REACTOME_GAMMA_CARBOXYLATION_TRANSPORT_AND_AMINO_TERMINAL_CLEAVAGE_OF_PROTEINS	1	1	11	0.214792	0.620373	0.207347	FURIN
REACTOME_HIGHLY_CALCIUM_PERMEABLE_POSTSYNAPTIC_NICOTINIC_ACETYLCHOLINE_RECEPTORS	1	1	11	0.214792	0.620373	0.207347	CHRNA6
REACTOME_INTERLEUKIN_6_SIGNALING	1	1	11	0.214792	0.620373	0.207347	SOCS3
REACTOME_REGULATION_OF_SIGNALING_BY_NODAL	1	1	11	0.214792	0.620373	0.207347	ACVR1B
REACTOME_VITAMIN_D_CALCIFEROL_METABOLISM	1	1	11	0.214792	0.620373	0.207347	CYP27B1
REACTOME_FREE_FATTY_ACIDS_REGULATE_INSULIN_SECRETION	1	1	11	0.214792	0.620373	0.207347	ACSL4
REACTOME_CLEC7A_DECTIN_1_INDUCES_NFAT_ACTIVATION	1	1	11	0.214792	0.620373	0.207347	ITPR1
REACTOME_PYRIMIDINE_SALVAGE	1	1	11	0.214792	0.620373	0.207347	UCKL1
REACTOME_O_LINKED_GLYCOSYLATION_OF_MUCINS	6	5	62	0.217791	0.627825	0.202161	GALNT1:B4GALT5:B3GNT2:C1GALT1C1:B3GNT5:GALNT11
REACTOME_GLOBAL_GENOME_NUCLEOTIDE_EXCISION_REPAIR_GG_NER	8	7	84	0.219298	0.628541	0.201666	LIG3:ERCC1:ACTR5:POLE4:INO80:CHD1L:CUL4A:UBC
REACTOME_RNA_POLYMERASE_II_PRE_TRANSCRIPTION_EVENTS	8	7	84	0.219298	0.628541	0.201666	ELL:NCBP2:CCNT1:TAF4B:EAF1:TAF13:TAF15:TAF9
REACTOME_REGULATION_OF_RUNX2_EXPRESSION_AND_ACTIVITY	7	6	73	0.219218	0.628541	0.201666	PSME4:PSMA6:PSMA2:FBXW7:SKP1:HIVEP3:UBC
REACTOME_MITOCHONDRIAL_TRNA_AMINOACYLATION	2	2	21	0.229158	0.648278	0.188239	GARS:MARS2
REACTOME_GLUTAMATE_BINDING_ACTIVATION_OF_AMPA_RECEPTORS_AND_SYNAPTIC_PLASTICITY	3	3	31	0.227778	0.648278	0.188239	MDM2:CAMK2D:GRIP1
REACTOME_DISASSEMBLY_OF_THE_DESTRUCTION_COMPLEX_AND_RECRUITMENT_OF_AXIN_TO_THE_MEMBRANE	3	3	31	0.227778	0.648278	0.188239	PPP2CB:DVL1:CSNK1A1
REACTOME_REGULATION_OF_FZD_BY_UBIQUITINATION	2	2	21	0.229158	0.648278	0.188239	UBC:ZNRF3
REACTOME_NEGATIVE_REGULATION_OF_MET_ACTIVITY	2	2	21	0.229158	0.648278	0.188239	UBC:PTPN2
REACTOME_CYCLIN_A:CDK2_ASSOCIATED_EVENTS_AT_S_PHASE_ENTRY	8	7	85	0.229425	0.648278	0.188239	PSMA6:PSMA2:CCND1:SKP1:CDKN1A:E2F5:MYC:UBC
REACTOME_INTERLEUKIN_37_SIGNALING	2	2	21	0.229158	0.648278	0.188239	IL18R1:PTPN2
REACTOME_PEROXISOMAL_PROTEIN_IMPORT	6	5	63	0.229643	0.648278	0.188239	UBE2D1:UBE2D3:PEX5:SLC27A2:UBC:PEX26
REACTOME_METABOLISM_OF_VITAMINS_AND_COFACTORS	17	15	189	0.239842	0.675796	0.170184	MTHFD2:SLC23A2:ABCC1:NAMPT:SLC19A2:PANK3:MTHFD1L:MTRR:RFK:NT5E:PARP9:MMAA:MTHFD2L:SLC25A32:PARP14:LPL:AGRN
REACTOME_PYRIMIDINE_CATABOLISM	1	1	12	0.245044	0.677303	0.169217	NT5E
REACTOME_NUCLEAR_SIGNALING_BY_ERBB4	3	3	32	0.245347	0.677303	0.169217	TAB2:STAT5A:ADAM17
REACTOME_HYALURONAN_UPTAKE_AND_DEGRADATION	1	1	12	0.245044	0.677303	0.169217	CD44
REACTOME_P2Y_RECEPTORS	1	1	12	0.245044	0.677303	0.169217	P2RY11
REACTOME_CD28_DEPENDENT_VAV1_PATHWAY	1	1	12	0.245044	0.677303	0.169217	FYN
REACTOME_SEMAPHORIN_INTERACTIONS	6	6	64	0.241708	0.677303	0.169217	FARP2:FYN:PLXNA1:SEMA7A:RHOB:DPYSL4
REACTOME_DISEASES_OF_GLYCOSYLATION	13	12	143	0.241782	0.677303	0.169217	POMT2:B4GALT7:ALG2:CHST3:CHSY1:NOTCH2:PMM2:NUS1:GNE:MGAT2:C1GALT1C1:B3GALT6:AGRN
REACTOME_JOSEPHIN_DOMAIN_DUBS	1	1	12	0.245044	0.677303	0.169217	UBC
REACTOME_TP53_REGULATES_TRANSCRIPTION_OF_CASPASE_ACTIVATORS_AND_CASPASES	1	1	12	0.245044	0.677303	0.169217	CRADD
REACTOME_REGULATION_OF_MECP2_EXPRESSION_AND_ACTIVITY	3	3	32	0.245347	0.677303	0.169217	AGO2:CAMK2D:HDAC2
REACTOME_NF_KB_ACTIVATION_THROUGH_FADD_RIP_1_PATHWAY_MEDIATED_BY_CASPASE_8_AND_10	1	1	12	0.245044	0.677303	0.169217	IFIH1
REACTOME_BILE_ACID_AND_BILE_SALT_METABOLISM	4	4	43	0.251926	0.687865	0.162497	OSBPL3:SLC27A5:OSBP:SLC27A2
REACTOME_FORMATION_OF_INCISION_COMPLEX_IN_GG_NER	4	4	43	0.251926	0.687865	0.162497	ERCC1:CHD1L:CUL4A:UBC
REACTOME_COMMON_PATHWAY_OF_FIBRIN_CLOT_FORMATION	2	2	22	0.250931	0.687865	0.162497	SERPINE2:F5
REACTOME_HOST_INTERACTIONS_WITH_INFLUENZA_FACTORS	4	4	43	0.251926	0.687865	0.162497	KPNA1:RANBP2:KPNA2:KPNA4
REACTOME_NOTCH2_ACTIVATION_AND_TRANSMISSION_OF_SIGNAL_TO_THE_NUCLEUS	2	2	22	0.250931	0.687865	0.162497	NOTCH2:UBC
REACTOME_DEFECTS_IN_VITAMIN_AND_COFACTOR_METABOLISM	2	2	22	0.250931	0.687865	0.162497	MTRR:MMAA
REACTOME_NUCLEOTIDE_EXCISION_REPAIR	10	9	110	0.253538	0.688811	0.1619	LIG3:ERCC1:ACTR5:ELL:POLE4:INO80:CHD1L:CUL4A:UBC:USP7
REACTOME_VIF_MEDIATED_DEGRADATION_OF_APOBEC3G	5	5	54	0.254111	0.688811	0.1619	PSME4:PSMA6:PSMA2:UBC:CUL5
REACTOME_ION_HOMEOSTASIS	5	5	54	0.254111	0.688811	0.1619	ATP1B1:CAMK2D:ITPR1:ATP1A1:PLN
REACTOME_NEGATIVE_REGULATION_OF_NOTCH4_SIGNALING	5	5	54	0.254111	0.688811	0.1619	PSMA6:PSMA2:FBXW7:SKP1:UBC
REACTOME_ANTIGEN_PROCESSING_CROSS_PRESENTATION	9	8	99	0.257274	0.696127	0.157312	PSME4:PSMA6:PSMA2:SEC61B:SEC61G:UBC:B2M:PDIA3:SEC22B
REACTOME_SIALIC_ACID_METABOLISM	3	3	33	0.263202	0.710881	0.148203	NANS:NPL:GNE
REACTOME_EPIGENETIC_REGULATION_OF_GENE_EXPRESSION	13	12	146	0.266266	0.717865	0.143957	JARID2:POLR1A:CHD4:CD3EAP:POLR1B:RRP8:MYBBP1A:TDG:DDX21:TAF1D:POLR1C:TET3:HDAC2
REACTOME_SYNTHESIS_OF_PE	1	2	13	0.275436	0.720702	0.142244	ETNK1
REACTOME_APOPTOSIS_INDUCED_DNA_FRAGMENTATION	1	2	13	0.275436	0.720702	0.142244	KPNA1
REACTOME_P75NTR_RECRUITS_SIGNALLING_COMPLEXES	1	2	13	0.275436	0.720702	0.142244	UBC
REACTOME_OPIOID_SIGNALLING	8	8	89	0.271527	0.720702	0.142244	CAMKK1:PPP2CB:CAMKK2:GNAI1:CAMK2D:ITPR1:PRKCD:KPNA2
REACTOME_ADVANCED_GLYCOSYLATION_ENDPRODUCT_RECEPTOR_SIGNALING	1	2	13	0.275436	0.720702	0.142244	APP
REACTOME_INHIBITION_OF_REPLICATION_INITIATION_OF_DAMAGED_DNA_BY_RB1_E2F1	1	2	13	0.275436	0.720702	0.142244	PPP2CB
REACTOME_DOWNREGULATION_OF_ERBB2:ERBB3_SIGNALING	1	2	13	0.275436	0.720702	0.142244	UBC
REACTOME_SIGNALING_BY_ACTIVIN	1	2	13	0.275436	0.720702	0.142244	ACVR1B
REACTOME_APC_C:CDC20_MEDIATED_DEGRADATION_OF_CYCLIN_B	2	2	23	0.272988	0.720702	0.142244	UBE2D1:UBC
REACTOME_ALPHA_LINOLENIC_OMEGA3_AND_LINOLEIC_OMEGA6_ACID_METABOLISM	1	2	13	0.275436	0.720702	0.142244	ACSL1
REACTOME_POU5F1_OCT4_SOX2_NANOG_ACTIVATE_GENES_RELATED_TO_PROLIFERATION	1	2	13	0.275436	0.720702	0.142244	NR6A1
REACTOME_SYNTHESIS_SECRETION_AND_INACTIVATION_OF_GLUCOSE_DEPENDENT_INSULINOTROPIC_POLYPEPTIDE_GIP	1	2	13	0.275436	0.720702	0.142244	SEC11C
REACTOME_FGFRL1_MODULATION_OF_FGFR1_SIGNALING	1	2	13	0.275436	0.720702	0.142244	FGFRL1
REACTOME_TRANSCRIPTION_COUPLED_NUCLEOTIDE_EXCISION_REPAIR_TC_NER	7	7	78	0.275492	0.720702	0.142244	LIG3:ERCC1:ELL:POLE4:CUL4A:UBC:USP7
REACTOME_DISSOLUTION_OF_FIBRIN_CLOT	1	2	13	0.275436	0.720702	0.142244	SERPINE2
REACTOME_FBXL7_DOWN_REGULATES_AURKA_DURING_MITOTIC_ENTRY_AND_IN_EARLY_MITOSIS	5	5	55	0.267831	0.720702	0.142244	PSME4:PSMA6:PSMA2:SKP1:UBC
REACTOME_MITOCHONDRIAL_CALCIUM_ION_TRANSPORT	2	2	23	0.272988	0.720702	0.142244	AKAP1:YME1L1
REACTOME_GOLGI_ASSOCIATED_VESICLE_BIOGENESIS	5	5	56	0.28173	0.734458	0.134033	SNX5:CPD:SNX9:FTH1:TXNDC5
REACTOME_METABOLISM_OF_STEROID_HORMONES	3	3	34	0.281288	0.734458	0.134033	FDX1:STARD4:HSD11B2
REACTOME_SIGNALING_BY_MODERATE_KINASE_ACTIVITY_BRAF_MUTANTS	4	4	45	0.282972	0.736414	0.132878	MARK3:APBB1IP:KSR1:CAMK2D
REACTOME_GLYCOGEN_BREAKDOWN_GLYCOGENOLYSIS	1	2	15	0.335822	0.741761	0.129736	PGM2L1
REACTOME_SYNTHESIS_OF_BILE_ACIDS_AND_BILE_SALTS_VIA_7ALPHA_HYDROXYCHOLESTEROL	2	2	24	0.295234	0.741761	0.129736	SLC27A5:SLC27A2
REACTOME_SIGNALING_BY_ERBB4	5	5	58	0.309973	0.741761	0.129736	TAB2:NEDD4:STAT5A:UBC:ADAM17
REACTOME_YAP1_AND_WWTR1_TAZ_STIMULATED_GENE_EXPRESSION	1	2	15	0.335822	0.741761	0.129736	TEAD3
REACTOME_TRIGLYCERIDE_BIOSYNTHESIS	1	2	14	0.305755	0.741761	0.129736	DGAT2
REACTOME_SIGNALLING_TO_P38_VIA_RIT_AND_RIN	0	1	5	0.338146	0.741761	0.129736
REACTOME_PLATELET_ADHESION_TO_EXPOSED_COLLAGEN	1	2	15	0.335822	0.741761	0.129736	FYN
REACTOME_MICRORNA_MIRNA_BIOGENESIS	2	2	25	0.317583	0.741761	0.129736	AGO2:PRKRA
REACTOME_FATTY_ACYL_COA_BIOSYNTHESIS	3	3	37	0.336441	0.741761	0.129736	ACSL4:ACSL1:ACSL5
REACTOME_NRAGE_SIGNALS_DEATH_THROUGH_JNK	5	5	59	0.324272	0.741761	0.129736	TRIO:ARHGEF2:BCL2L11:TIAM1:ARHGEF3
REACTOME_METABOLISM_OF_POLYAMINES	5	5	59	0.324272	0.741761	0.129736	PSME4:PSMA6:PSMA2:AMD1:NQO1
REACTOME_ADENYLATE_CYCLASE_INHIBITORY_PATHWAY	1	2	14	0.305755	0.741761	0.129736	GNAI1
REACTOME_P130CAS_LINKAGE_TO_MAPK_SIGNALING_FOR_INTEGRINS	1	2	15	0.335822	0.741761	0.129736	APBB1IP
REACTOME_ACETYLCHOLINE_BINDING_AND_DOWNSTREAM_EVENTS	1	2	14	0.305755	0.741761	0.129736	CHRNA6
REACTOME_EICOSANOID_LIGAND_BINDING_RECEPTORS	1	2	15	0.335822	0.741761	0.129736	PTGER4
REACTOME_MITOTIC_G1_G1_S_PHASES	13	12	149	0.29157	0.741761	0.129736	PSMA6:PPP2CB:CDK6:PSMA2:CCND1:SKP1:POLE4:CDKN1A:E2F5:MYC:UBC:E2F6:PPP2R2A
REACTOME_IRON_UPTAKE_AND_TRANSPORT	5	5	58	0.309973	0.741761	0.129736	SKP1:IREB2:UBC:FTH1:ATP6V0A2
REACTOME_N_GLYCAN_ANTENNAE_ELONGATION	1	2	15	0.335822	0.741761	0.129736	B4GALT5
REACTOME_TRAF6_MEDIATED_IRF7_ACTIVATION_IN_TLR7_8_OR_9_SIGNALING	1	2	14	0.305755	0.741761	0.129736	UBC
REACTOME_N_GLYCAN_ANTENNAE_ELONGATION_IN_THE_MEDIAL_TRANS_GOLGI	2	3	26	0.339953	0.741761	0.129736	B4GALT5:MGAT2
REACTOME_REGULATION_OF_IFNA_SIGNALING	2	3	26	0.339953	0.741761	0.129736	SOCS3:SOCS1
REACTOME_GLUTATHIONE_CONJUGATION	3	3	36	0.317956	0.741761	0.129736	GCLC:GCLM:CHAC1
REACTOME_GLUCOSE_METABOLISM	8	8	92	0.304485	0.741761	0.129736	PFKP:PPP2CB:GCK:GOT1:PFKFB2:RANBP2:ADPGK:PGM2L1
REACTOME_APC_CDC20_MEDIATED_DEGRADATION_OF_NEK2A	2	2	25	0.317583	0.741761	0.129736	UBE2D1:UBC
REACTOME_ACTIVATION_OF_BAD_AND_TRANSLOCATION_TO_MITOCHONDRIA	1	2	15	0.335822	0.741761	0.129736	BCL2
REACTOME_DISINHIBITION_OF_SNARE_FORMATION	0	1	5	0.338146	0.741761	0.129736
REACTOME_ACTIVATION_OF_RAS_IN_B_CELLS	0	1	5	0.338146	0.741761	0.129736
REACTOME_GRB7_EVENTS_IN_ERBB2_SIGNALING	0	1	5	0.338146	0.741761	0.129736
REACTOME_EXTRINSIC_PATHWAY_OF_FIBRIN_CLOT_FORMATION	0	1	5	0.338146	0.741761	0.129736
REACTOME_SYNTHESIS_OF_PI	0	1	5	0.338146	0.741761	0.129736
REACTOME_SYNTHESIS_OF_PIPS_AT_THE_ER_MEMBRANE	0	1	5	0.338146	0.741761	0.129736
REACTOME_TRANSPORT_OF_THE_SLBP_DEPENDANT_MATURE_MRNA	3	3	36	0.317956	0.741761	0.129736	NCBP2:EIF4E:RANBP2
REACTOME_IRF3_MEDIATED_ACTIVATION_OF_TYPE_1_IFN	0	1	5	0.338146	0.741761	0.129736
REACTOME_DEGRADATION_OF_CYSTEINE_AND_HOMOCYSTEINE	1	2	14	0.305755	0.741761	0.129736	ADO
REACTOME_GOLGI_CISTERNAE_PERICENTRIOLAR_STACK_REORGANIZATION	1	2	14	0.305755	0.741761	0.129736	GORASP2
REACTOME_PKA_MEDIATED_PHOSPHORYLATION_OF_KEY_METABOLIC_FACTORS	0	1	5	0.338146	0.741761	0.129736
REACTOME_MITOCHONDRIAL_UNCOUPLING_PROTEINS	0	1	5	0.338146	0.741761	0.129736
REACTOME_ALTERNATIVE_COMPLEMENT_ACTIVATION	0	1	5	0.338146	0.741761	0.129736
REACTOME_APOBEC3G_MEDIATED_RESISTANCE_TO_HIV_1_INFECTION	0	1	5	0.338146	0.741761	0.129736
REACTOME_NGF_INDEPENDANT_TRKA_ACTIVATION	0	1	5	0.338146	0.741761	0.129736
REACTOME_HEME_DEGRADATION	0	1	5	0.338146	0.741761	0.129736
REACTOME_NOSTRIN_MEDIATED_ENOS_TRAFFICKING	0	1	5	0.338146	0.741761	0.129736
REACTOME_SEROTONIN_AND_MELATONIN_BIOSYNTHESIS	0	1	5	0.338146	0.741761	0.129736
REACTOME_REGULATION_OF_GENE_EXPRESSION_IN_ENDOCRINE_COMMITTED_NEUROG3PLUS_PROGENITOR_CELLS	0	1	5	0.338146	0.741761	0.129736
REACTOME_HYALURONAN_BIOSYNTHESIS_AND_EXPORT	0	1	5	0.338146	0.741761	0.129736
REACTOME_ABACAVIR_TRANSMEMBRANE_TRANSPORT	0	1	5	0.338146	0.741761	0.129736
REACTOME_ABACAVIR_METABOLISM	0	1	5	0.338146	0.741761	0.129736
REACTOME_CELLULAR_RESPONSES_TO_STRESS	37	35	440	0.310349	0.741761	0.129736	MAP2K3:HSPA5:MAP2K4:PSME4:UBE2D1:MAPKAPK5:HIF1A:PSMA6:CDK6:DNAJC2:DNAJB6:PSMA2:BAG1:NFKB1:UBE2D3:SOD2:VEGFA:CDKN1A:HSPA2:KDM6B:PHC2:MDM2:RPTOR:CAMK2D:TNFRSF21:UBC:RANBP2:HSPA13:EEF1A1:ETS2:BMI1:FOS:CYCS:RELA:HSPA6:EP400:TXNRD1
REACTOME_FICOLINS_BIND_TO_REPETITIVE_CARBOHYDRATE_STRUCTURES_ON_THE_TARGET_CELL_SURFACE	0	1	5	0.338146	0.741761	0.129736
REACTOME_SUMOYLATION	16	15	187	0.312126	0.741761	0.129736	NOP58:NFKBIA:SENP5:RARA:PHC2:MDM2:TDG:RANBP2:NR4A2:WRN:BMI1:RELA:NRIP1:HDAC2:TOP1:EID3
REACTOME_SUMO_IS_CONJUGATED_TO_E1_UBA2:SAE1	0	1	5	0.338146	0.741761	0.129736
REACTOME_REGULATION_OF_INNATE_IMMUNE_RESPONSES_TO_CYTOSOLIC_DNA	1	2	15	0.335822	0.741761	0.129736	UBC
REACTOME_PKMTS_METHYLATE_HISTONE_LYSINES	6	6	69	0.304634	0.741761	0.129736	SETD1A:SETD6:DOT1L:NFKB1:SETD7:RELA
REACTOME_DETOXIFICATION_OF_REACTIVE_OXYGEN_SPECIES	3	3	37	0.336441	0.741761	0.129736	SOD2:CYCS:TXNRD1
REACTOME_GRB2:SOS_PROVIDES_LINKAGE_TO_MAPK_SIGNALING_FOR_INTEGRINS	1	2	15	0.335822	0.741761	0.129736	APBB1IP
REACTOME_DEFECTIVE_EXT2_CAUSES_EXOSTOSES_2	1	2	14	0.305755	0.741761	0.129736	AGRN
REACTOME_TACHYKININ_RECEPTORS_BIND_TACHYKININS	0	1	5	0.338146	0.741761	0.129736
REACTOME_MUSCARINIC_ACETYLCHOLINE_RECEPTORS	0	1	5	0.338146	0.741761	0.129736
REACTOME_DOPAMINE_RECEPTORS	0	1	5	0.338146	0.741761	0.129736
REACTOME_LEUKOTRIENE_RECEPTORS	0	1	5	0.338146	0.741761	0.129736
REACTOME_LYSOSPHINGOLIPID_AND_LPA_RECEPTORS	1	2	14	0.305755	0.741761	0.129736	S1PR2
REACTOME_ARACHIDONATE_PRODUCTION_FROM_DAG	0	1	5	0.338146	0.741761	0.129736
REACTOME_SODIUM_COUPLED_SULPHATE_DI_AND_TRI_CARBOXYLATE_TRANSPORTERS	0	1	5	0.338146	0.741761	0.129736
REACTOME_DEPOLYMERISATION_OF_THE_NUCLEAR_LAMINA	1	2	15	0.335822	0.741761	0.129736	LMNA
REACTOME_FREE_FATTY_ACID_RECEPTORS	0	1	5	0.338146	0.741761	0.129736
REACTOME_SUMOYLATION_OF_RNA_BINDING_PROTEINS	4	4	47	0.31469	0.741761	0.129736	NOP58:PHC2:RANBP2:BMI1
REACTOME_POSITIVE_EPIGENETIC_REGULATION_OF_RRNA_EXPRESSION	9	9	104	0.308619	0.741761	0.129736	POLR1A:CHD4:CD3EAP:POLR1B:MYBBP1A:DDX21:TAF1D:POLR1C:HDAC2
REACTOME_TOXICITY_OF_BOTULINUM_TOXIN_TYPE_D_BONT_D	0	1	5	0.338146	0.741761	0.129736
REACTOME_DISEASES_OF_MISMATCH_REPAIR_MMR	0	1	5	0.338146	0.741761	0.129736
REACTOME_ORGANIC_ANION_TRANSPORT	0	1	5	0.338146	0.741761	0.129736
REACTOME_DEGRADATION_OF_GLI1_BY_THE_PROTEASOME	5	5	60	0.338659	0.741761	0.129736	PSME4:PSMA6:PSMA2:SKP1:UBC
REACTOME_TRAFFICKING_OF_MYRISTOYLATED_PROTEINS_TO_THE_CILIUM	0	1	5	0.338146	0.741761	0.129736
REACTOME_FORMATION_OF_XYLULOSE_5_PHOSPHATE	0	1	5	0.338146	0.741761	0.129736
REACTOME_MELANIN_BIOSYNTHESIS	0	1	5	0.338146	0.741761	0.129736
REACTOME_LGI_ADAM_INTERACTIONS	1	2	14	0.305755	0.741761	0.129736	STX1A
REACTOME_METALLOPROTEASE_DUBS	3	3	37	0.336441	0.741761	0.129736	UIMC1:UBC:NLRP3
REACTOME_NEUREXINS_AND_NEUROLIGINS	5	5	57	0.295785	0.741761	0.129736	EPB41L2:STX1A:LIN7C:HOMER1:SIPA1L1
REACTOME_TP53_REGULATES_TRANSCRIPTION_OF_GENES_INVOLVED_IN_G1_CELL_CYCLE_ARREST	1	2	14	0.305755	0.741761	0.129736	CDKN1A
REACTOME_REGULATION_OF_TP53_ACTIVITY_THROUGH_ASSOCIATION_WITH_CO_FACTORS	1	2	14	0.305755	0.741761	0.129736	TP53BP2
REACTOME_G2_PHASE	0	1	5	0.338146	0.741761	0.129736
REACTOME_CYCLIN_A_B1_B2_ASSOCIATED_EVENTS_DURING_G2_M_TRANSITION	2	2	25	0.317583	0.741761	0.129736	PPP2CB:PPP2R2A
REACTOME_G2_M_DNA_REPLICATION_CHECKPOINT	0	1	5	0.338146	0.741761	0.129736
REACTOME_STABILIZATION_OF_P53	5	5	57	0.295785	0.741761	0.129736	PSME4:PSMA6:PSMA2:MDM2:UBC
REACTOME_G1_S_DNA_DAMAGE_CHECKPOINTS	6	6	68	0.291758	0.741761	0.129736	PSME4:PSMA6:PSMA2:CDKN1A:MDM2:UBC
REACTOME_FRUCTOSE_CATABOLISM	0	1	5	0.338146	0.741761	0.129736
REACTOME_RNA_POLYMERASE_II_TRANSCRIPTION_PRE_INITIATION_AND_PROMOTER_OPENING	4	4	47	0.31469	0.741761	0.129736	TAF4B:TAF13:TAF15:TAF9
REACTOME_IRS_ACTIVATION	0	1	5	0.338146	0.741761	0.129736
REACTOME_BETA_OXIDATION_OF_LAUROYL_COA_TO_DECANOYL_COA_COA	0	1	5	0.338146	0.741761	0.129736
REACTOME_BETA_OXIDATION_OF_OCTANOYL_COA_TO_HEXANOYL_COA	0	1	5	0.338146	0.741761	0.129736
REACTOME_BETA_OXIDATION_OF_HEXANOYL_COA_TO_BUTANOYL_COA	0	1	5	0.338146	0.741761	0.129736
REACTOME_BETA_OXIDATION_OF_BUTANOYL_COA_TO_ACETYL_COA	0	1	5	0.338146	0.741761	0.129736
REACTOME_PROTEIN_UBIQUITINATION	7	7	79	0.287207	0.741761	0.129736	UBE2D1:UBE2D3:UCHL3:PEX5:UBC:UBE2G2:USP7
REACTOME_SIGNALING_BY_MST1	0	1	5	0.338146	0.741761	0.129736
REACTOME_INTERLEUKIN_20_FAMILY_SIGNALING	2	3	26	0.339953	0.741761	0.129736	STAT5A:SOCS3
REACTOME_MET_ACTIVATES_PTPN11	0	1	5	0.338146	0.741761	0.129736
REACTOME_VLDL_ASSEMBLY	0	1	5	0.338146	0.741761	0.129736
REACTOME_TFAP2_AP_2_FAMILY_REGULATES_TRANSCRIPTION_OF_GROWTH_FACTORS_AND_THEIR_RECEPTORS	1	2	15	0.335822	0.741761	0.129736	VEGFA
REACTOME_TFAP2A_ACTS_AS_A_TRANSCRIPTIONAL_REPRESSOR_DURING_RETINOIC_ACID_INDUCED_CELL_DIFFERENTIATION	0	1	5	0.338146	0.741761	0.129736
REACTOME_INLB_MEDIATED_ENTRY_OF_LISTERIA_MONOCYTOGENES_INTO_HOST_CELL	1	2	15	0.335822	0.741761	0.129736	UBC
REACTOME_MET_INTERACTS_WITH_TNS_PROTEINS	0	1	5	0.338146	0.741761	0.129736
REACTOME_RUNX1_REGULATES_EXPRESSION_OF_COMPONENTS_OF_TIGHT_JUNCTIONS	0	1	5	0.338146	0.741761	0.129736
REACTOME_RUNX2_REGULATES_CHONDROCYTE_MATURATION	0	1	5	0.338146	0.741761	0.129736
REACTOME_NUCLEOBASE_BIOSYNTHESIS	1	2	15	0.335822	0.741761	0.129736	DHODH
REACTOME_INTESTINAL_ABSORPTION	0	1	5	0.338146	0.741761	0.129736
REACTOME_TYROSINE_CATABOLISM	0	1	5	0.338146	0.741761	0.129736
REACTOME_HDL_CLEARANCE	0	1	5	0.338146	0.741761	0.129736
REACTOME_CHYLOMICRON_CLEARANCE	0	1	5	0.338146	0.741761	0.129736
REACTOME_SIGNALING_BY_NTRK2_TRKB	2	2	25	0.317583	0.741761	0.129736	FYN:TIAM1
REACTOME_NOTCH3_INTRACELLULAR_DOMAIN_REGULATES_TRANSCRIPTION	2	2	25	0.317583	0.741761	0.129736	MAMLD1:RBPJ
REACTOME_BIOSYNTHESIS_OF_E_SERIES_18_S_RESOLVINS	0	1	5	0.338146	0.741761	0.129736
REACTOME_MECP2_REGULATES_TRANSCRIPTION_FACTORS	0	1	5	0.338146	0.741761	0.129736
REACTOME_HOST_INTERACTIONS_OF_HIV_FACTORS	11	11	131	0.343115	0.747573	0.126347	FYN:PSME4:PSMA6:PSMA2:SKP1:KPNA1:CCNT1:UBC:RANBP2:CUL5:B2M
REACTOME_TRANS_GOLGI_NETWORK_VESICLE_BUDDING	6	6	72	0.343861	0.748111	0.126034	SNX5:CPD:SNX9:APP:FTH1:TXNDC5
REACTOME_TRANSCRIPTIONAL_REGULATION_BY_RUNX2	10	10	120	0.352288	0.765333	0.11615	PSME4:PSMA6:PSMA2:FBXW7:CCND1:SKP1:CDKN1A:HIVEP3:UBC:YES1
REACTOME_RESOLUTION_OF_ABASIC_SITES_AP_SITES	3	4	38	0.354965	0.770033	0.113491	LIG3:POLE4:TDG
REACTOME_RECYCLING_OF_BILE_ACIDS_AND_SALTS	1	2	16	0.365488	0.772254	0.11224	SLC27A5
REACTOME_G0_AND_EARLY_G1	2	3	27	0.36227	0.772254	0.11224	E2F5:MYC
REACTOME_VITAMIN_B5_PANTOTHENATE_METABOLISM	1	2	17	0.394628	0.772254	0.11224	PANK3
REACTOME_SIGNALING_BY_BMP	2	3	28	0.384465	0.772254	0.11224	UBE2D1:UBE2D3
REACTOME_ACYL_CHAIN_REMODELLING_OF_PI	1	2	17	0.394628	0.772254	0.11224	PLA2G12A
REACTOME_TGF_BETA_RECEPTOR_SIGNALING_IN_EMT_EPITHELIAL_TO_MESENCHYMAL_TRANSITION	1	2	16	0.365488	0.772254	0.11224	UBC
REACTOME_HYALURONAN_METABOLISM	1	2	17	0.394628	0.772254	0.11224	CD44
REACTOME_KERATAN_SULFATE_BIOSYNTHESIS	2	3	28	0.384465	0.772254	0.11224	B4GALT5:B3GNT2
REACTOME_REGULATION_OF_PYRUVATE_DEHYDROGENASE_PDH_COMPLEX	1	2	16	0.365488	0.772254	0.11224	PDP2
REACTOME_NRIF_SIGNALS_CELL_DEATH_FROM_THE_NUCLEUS	1	2	16	0.365488	0.772254	0.11224	UBC
REACTOME_NEUROTRANSMITTER_RELEASE_CYCLE	4	5	51	0.379144	0.772254	0.11224	STX1A:GLS:PPFIA1:LIN7C
REACTOME_ENDOGENOUS_STEROLS	2	3	27	0.36227	0.772254	0.11224	AHR:FDX1
REACTOME_TRAFFICKING_OF_GLUR2_CONTAINING_AMPA_RECEPTORS	1	2	17	0.394628	0.772254	0.11224	GRIP1
REACTOME_EFFECTS_OF_PIP2_HYDROLYSIS	2	3	27	0.36227	0.772254	0.11224	ITPR1:PRKCD
REACTOME_CGMP_EFFECTS	1	2	16	0.365488	0.772254	0.11224	ITPR1
REACTOME_PLATELET_SENSITIZATION_BY_LDL	1	2	17	0.394628	0.772254	0.11224	PPP2CB
REACTOME_PLATELET_CALCIUM_HOMEOSTASIS	2	3	28	0.384465	0.772254	0.11224	P2RX7:ITPR1
REACTOME_ACROSOME_REACTION_AND_SPERM:OOCYTE_MEMBRANE_BINDING	0	1	6	0.390598	0.772254	0.11224
REACTOME_TRANSCRIPTION_OF_E2F_TARGETS_UNDER_NEGATIVE_CONTROL_BY_P107_RBL1_AND_P130_RBL2_IN_COMPLEX_WITH_HDAC1	1	2	16	0.365488	0.772254	0.11224	E2F5
REACTOME_ACYL_CHAIN_REMODELING_OF_CL	0	1	6	0.390598	0.772254	0.11224
REACTOME_FIBRONECTIN_MATRIX_FORMATION	0	1	6	0.390598	0.772254	0.11224
REACTOME_SULFIDE_OXIDATION_TO_SULFATE	0	1	6	0.390598	0.772254	0.11224
REACTOME_THE_ROLE_OF_NEF_IN_HIV_1_REPLICATION_AND_DISEASE_PATHOGENESIS	2	3	28	0.384465	0.772254	0.11224	FYN:B2M
REACTOME_TELOMERE_EXTENSION_BY_TELOMERASE	0	1	6	0.390598	0.772254	0.11224
REACTOME_TRANSPORT_AND_SYNTHESIS_OF_PAPS	0	1	6	0.390598	0.772254	0.11224
REACTOME_PHOSPHORYLATION_OF_EMI1	0	1	6	0.390598	0.772254	0.11224
REACTOME_CONJUGATION_OF_BENZOATE_WITH_GLYCINE	0	1	6	0.390598	0.772254	0.11224
REACTOME_ACTIVATION_OF_TRKA_RECEPTORS	0	1	6	0.390598	0.772254	0.11224
REACTOME_FGFR1B_LIGAND_BINDING_AND_ACTIVATION	0	1	6	0.390598	0.772254	0.11224
REACTOME_ESTROGEN_BIOSYNTHESIS	0	1	6	0.390598	0.772254	0.11224
REACTOME_MINERALOCORTICOID_BIOSYNTHESIS	0	1	6	0.390598	0.772254	0.11224
REACTOME_NADE_MODULATES_DEATH_SIGNALLING	0	1	6	0.390598	0.772254	0.11224
REACTOME_SYNTHESIS_OF_LIPOXINS_LX	0	1	6	0.390598	0.772254	0.11224
REACTOME_SYNTHESIS_OF_15_EICOSATETRAENOIC_ACID_DERIVATIVES	0	1	6	0.390598	0.772254	0.11224
REACTOME_OXIDATIVE_STRESS_INDUCED_SENESCENCE	10	10	124	0.393544	0.772254	0.11224	MAP2K3:MAP2K4:MAPKAPK5:CDK6:KDM6B:PHC2:MDM2:UBC:BMI1:FOS
REACTOME_CELLULAR_SENESCENCE	16	16	194	0.368187	0.772254	0.11224	MAP2K3:MAP2K4:UBE2D1:MAPKAPK5:CDK6:NFKB1:CDKN1A:KDM6B:PHC2:MDM2:UBC:ETS2:BMI1:FOS:RELA:EP400
REACTOME_SCAVENGING_BY_CLASS_B_RECEPTORS	0	1	6	0.390598	0.772254	0.11224
REACTOME_GLYCOGEN_STORAGE_DISEASES	1	2	16	0.365488	0.772254	0.11224	UBC
REACTOME_REGULATION_OF_INSULIN_LIKE_GROWTH_FACTOR_IGF_TRANSPORT_AND_UPTAKE_BY_INSULIN_LIKE_GROWTH_FACTOR_BINDING_PROTEINS_IGFBPS	10	10	124	0.393544	0.772254	0.11224	RCN1:LGALS1:APOL1:DNAJC3:APP:PDIA6:HSP90B1:IGF2:CSF1:F5
REACTOME_VASOPRESSIN_LIKE_RECEPTORS	0	1	6	0.390598	0.772254	0.11224
REACTOME_DEFECTIVE_C1GALT1C1_CAUSES_TN_POLYAGGLUTINATION_SYNDROME_TNPS	1	2	17	0.394628	0.772254	0.11224	C1GALT1C1
REACTOME_VEGFR2_MEDIATED_VASCULAR_PERMEABILITY	2	3	27	0.36227	0.772254	0.11224	CTNNA1:PRR5
REACTOME_MISSPLICED_LRP5_MUTANTS_HAVE_ENHANCED_BETA_CATENIN_DEPENDENT_SIGNALING	0	1	6	0.390598	0.772254	0.11224
REACTOME_TRANSLESION_SYNTHESIS_BY_POLK	1	2	17	0.394628	0.772254	0.11224	UBC
REACTOME_NEGATIVE_FEEDBACK_REGULATION_OF_MAPK_PATHWAY	0	1	6	0.390598	0.772254	0.11224
REACTOME_PROTEIN_REPAIR	0	1	6	0.390598	0.772254	0.11224
REACTOME_UB_SPECIFIC_PROCESSING_PROTEASES	18	18	221	0.389049	0.772254	0.11224	BIRC3:PSME4:HIF1A:PSMA6:NFKBIA:USP14:USP42:PSMA2:USP4:IFIH1:MDM2:MYC:PTRH2:UBC:USP12:TOMM20:SIAH2:USP7
REACTOME_GDP_FUCOSE_BIOSYNTHESIS	0	1	6	0.390598	0.772254	0.11224
REACTOME_CHOLINE_CATABOLISM	0	1	6	0.390598	0.772254	0.11224
REACTOME_METAL_SEQUESTRATION_BY_ANTIMICROBIAL_PROTEINS	0	1	6	0.390598	0.772254	0.11224
REACTOME_FGFR2_ALTERNATIVE_SPLICING	2	3	27	0.36227	0.772254	0.11224	NCBP2:HNRNPA1
REACTOME_MET_RECEPTOR_ACTIVATION	0	1	6	0.390598	0.772254	0.11224
REACTOME_ASSEMBLY_OF_THE_ORC_COMPLEX_AT_THE_ORIGIN_OF_REPLICATION	0	1	6	0.390598	0.772254	0.11224
REACTOME_MITOCHONDRIAL_FATTY_ACID_BETA_OXIDATION_OF_UNSATURATED_FATTY_ACIDS	0	1	6	0.390598	0.772254	0.11224
REACTOME_BETA_OXIDATION_OF_DECANOYL_COA_TO_OCTANOYL_COA_COA	0	1	6	0.390598	0.772254	0.11224
REACTOME_MET_ACTIVATES_PI3K_AKT_SIGNALING	0	1	6	0.390598	0.772254	0.11224
REACTOME_DOWNREGULATION_OF_ERBB2_SIGNALING	2	3	28	0.384465	0.772254	0.11224	UBC:CUL5
REACTOME_PROTEIN_METHYLATION	1	2	17	0.394628	0.772254	0.11224	EEF1A1
REACTOME_RUNX1_REGULATES_ESTROGEN_RECEPTOR_MEDIATED_TRANSCRIPTION	0	1	6	0.390598	0.772254	0.11224
REACTOME_RUNX1_REGULATES_TRANSCRIPTION_OF_GENES_INVOLVED_IN_BCR_SIGNALING	0	1	6	0.390598	0.772254	0.11224
REACTOME_RUNX1_REGULATES_TRANSCRIPTION_OF_GENES_INVOLVED_IN_WNT_SIGNALING	0	1	6	0.390598	0.772254	0.11224
REACTOME_RUNX3_REGULATES_IMMUNE_RESPONSE_AND_CELL_MIGRATION	0	1	6	0.390598	0.772254	0.11224
REACTOME_PROCESSING_OF_SMDT1	1	2	16	0.365488	0.772254	0.11224	YME1L1
REACTOME_VLDL_CLEARANCE	0	1	6	0.390598	0.772254	0.11224
REACTOME_PHENYLALANINE_METABOLISM	0	1	6	0.390598	0.772254	0.11224
REACTOME_LIPID_PARTICLE_ORGANIZATION	0	1	6	0.390598	0.772254	0.11224
REACTOME_GLYCOGEN_METABOLISM	2	3	27	0.36227	0.772254	0.11224	UBC:PGM2L1
REACTOME_TLR3_MEDIATED_TICAM1_DEPENDENT_PROGRAMMED_CELL_DEATH	0	1	6	0.390598	0.772254	0.11224
REACTOME_ESTROGEN_DEPENDENT_GENE_EXPRESSION	12	12	148	0.39075	0.772254	0.11224	CCND1:MYB:AGO2:FOSB:CCNT1:MYC:TLE3:CHD1:FOS:BCL2:NRIP1:KPNA2
REACTOME_BIOSYNTHESIS_OF_EPA_DERIVED_SPMS	0	1	6	0.390598	0.772254	0.11224
REACTOME_BIOSYNTHESIS_OF_MARESIN_LIKE_SPMS	0	1	6	0.390598	0.772254	0.11224
REACTOME_MOLYBDENUM_COFACTOR_BIOSYNTHESIS	0	1	6	0.390598	0.772254	0.11224
REACTOME_ACTIVATED_NTRK3_SIGNALS_THROUGH_PI3K	0	1	6	0.390598	0.772254	0.11224
REACTOME_ACTIVATION_OF_AMPK_DOWNSTREAM_OF_NMDARS	2	3	28	0.384465	0.772254	0.11224	CAMKK2:PRKAB1
REACTOME_ESTROGEN_STIMULATED_SIGNALING_THROUGH_PRKCZ	0	1	6	0.390598	0.772254	0.11224
REACTOME_CELL_DEATH_SIGNALLING_VIA_NRAGE_NRIF_AND_NADE	6	7	76	0.396944	0.775774	0.110265	TRIO:ARHGEF2:UBC:BCL2L11:TIAM1:ARHGEF3
REACTOME_MRNA_CAPPING	2	3	29	0.406476	0.785189	0.105026	RNMT:NCBP2
REACTOME_DOWNSTREAM_SIGNAL_TRANSDUCTION	2	3	29	0.406476	0.785189	0.105026	STAT5A:PDGFA
REACTOME_MYOGENESIS	2	3	29	0.406476	0.785189	0.105026	SPAG9:CTNNA1
REACTOME_TRAF6_MEDIATED_IRF7_ACTIVATION	2	3	29	0.406476	0.785189	0.105026	IFIH1:TANK
REACTOME_G1_S_SPECIFIC_TRANSCRIPTION	2	3	29	0.406476	0.785189	0.105026	E2F5:E2F6
REACTOME_DAP12_SIGNALING	2	3	29	0.406476	0.785189	0.105026	FYN:B2M
REACTOME_FC_EPSILON_RECEPTOR_FCERI_SIGNALING	15	15	186	0.403104	0.785189	0.105026	FYN:TAB2:MAP2K4:PSME4:UBE2D1:PSMA6:NFKBIA:PSMA2:NFKB1:ITK:SKP1:UBC:ITPR1:FOS:RELA
REACTOME_EPHA_MEDIATED_GROWTH_CONE_COLLAPSE	2	3	29	0.406476	0.785189	0.105026	FYN:YES1
REACTOME_NEGATIVE_REGULATION_OF_FGFR3_SIGNALING	2	3	29	0.406476	0.785189	0.105026	PPP2CB:UBC
REACTOME_MITOCHONDRIAL_PROTEIN_IMPORT	5	6	65	0.411172	0.78964	0.102571	PITRM1:GRPEL1:TIMM8A:TOMM20:TOMM5
REACTOME_REGULATION_OF_APOPTOSIS	4	5	53	0.411413	0.78964	0.102571	PSME4:PSMA6:PSMA2:UBC
REACTOME_SUMOYLATION_OF_DNA_DAMAGE_RESPONSE_AND_REPAIR_PROTEINS	6	7	77	0.410247	0.78964	0.102571	PHC2:TDG:RANBP2:WRN:BMI1:EID3
REACTOME_SIGNALING_BY_HEDGEHOG	12	12	150	0.409726	0.78964	0.102571	CUL3:PSME4:SEL1L:DERL2:PSMA6:RPGRIP1L:PSMA2:SKP1:CSNK1A1:UBC:ADAM17:SYVN1
REACTOME_DUAL_INCISION_IN_TC_NER	5	6	65	0.411172	0.78964	0.102571	ERCC1:POLE4:CUL4A:UBC:USP7
REACTOME_ACTIVATED_NOTCH1_TRANSMITS_SIGNAL_TO_THE_NUCLEUS	2	3	31	0.449724	0.802792	0.0953968	UBC:ADAM17
REACTOME_ARMS_MEDIATED_ACTIVATION	0	1	7	0.438897	0.802792	0.0953968
REACTOME_ACYL_CHAIN_REMODELLING_OF_PG	1	2	18	0.423137	0.802792	0.0953968	PLA2G12A
REACTOME_EGFR_DOWNREGULATION	2	3	31	0.449724	0.802792	0.0953968	UBC:SPRY1
REACTOME_REGULATION_OF_BETA_CELL_DEVELOPMENT	3	4	42	0.428633	0.802792	0.0953968	MAMLD1:GCK:RBPJ
REACTOME_SYNTHESIS_SECRETION_AND_DEACYLATION_OF_GHRELIN	1	2	19	0.450935	0.802792	0.0953968	SEC11C
REACTOME_BRANCHED_CHAIN_AMINO_ACID_CATABOLISM	1	2	19	0.450935	0.802792	0.0953968	BCAT1
REACTOME_PYRUVATE_METABOLISM	2	3	31	0.449724	0.802792	0.0953968	SLC16A1:PDP2
REACTOME_PURINE_CATABOLISM	1	2	18	0.423137	0.802792	0.0953968	NT5E
REACTOME_GABA_SYNTHESIS_RELEASE_REUPTAKE_AND_DEGRADATION	1	2	19	0.450935	0.802792	0.0953968	STX1A
REACTOME_ION_TRANSPORT_BY_P_TYPE_ATPASES	4	5	55	0.443428	0.802792	0.0953968	ATP1B1:CAMK2D:ATP1A1:PLN
REACTOME_SOS_MEDIATED_SIGNALLING	0	1	7	0.438897	0.802792	0.0953968
REACTOME_PHOSPHORYLATION_OF_THE_APC_C	1	2	19	0.450935	0.802792	0.0953968	UBE2D1
REACTOME_TRANSLESION_SYNTHESIS_BY_POLH	1	2	19	0.450935	0.802792	0.0953968	UBC
REACTOME_RORA_ACTIVATES_GENE_EXPRESSION	1	2	18	0.423137	0.802792	0.0953968	TGS1
REACTOME_TRANSPORT_OF_MATURE_MRNAS_DERIVED_FROM_INTRONLESS_TRANSCRIPTS	3	4	43	0.446757	0.802792	0.0953968	NCBP2:EIF4E:RANBP2
REACTOME_ACTIVATION_OF_C3_AND_C5	0	1	7	0.438897	0.802792	0.0953968
REACTOME_CONVERSION_FROM_APC_C:CDC20_TO_APC_C:CDH1_IN_LATE_ANAPHASE	1	2	19	0.450935	0.802792	0.0953968	UBE2D1
REACTOME_NEF_MEDIATED_CD8_DOWN_REGULATION	0	1	7	0.438897	0.802792	0.0953968
REACTOME_FGFR1_MUTANT_RECEPTOR_ACTIVATION	2	3	31	0.449724	0.802792	0.0953968	LRRFIP1:STAT5A
REACTOME_FGFR3B_LIGAND_BINDING_AND_ACTIVATION	0	1	7	0.438897	0.802792	0.0953968
REACTOME_DIGESTION_OF_DIETARY_LIPID	0	1	7	0.438897	0.802792	0.0953968
REACTOME_SYNTHESIS_OF_12_EICOSATETRAENOIC_ACID_DERIVATIVES	0	1	7	0.438897	0.802792	0.0953968
REACTOME_THE_RETINOID_CYCLE_IN_CONES_DAYLIGHT_VISION	0	1	7	0.438897	0.802792	0.0953968
REACTOME_PHOSPHATE_BOND_HYDROLYSIS_BY_NUDT_PROTEINS	0	1	7	0.438897	0.802792	0.0953968
REACTOME_ACTIVATION_OF_NIMA_KINASES_NEK9_NEK6_NEK7	0	1	7	0.438897	0.802792	0.0953968
REACTOME_SUMO_IS_TRANSFERRED_FROM_E1_TO_E2_UBE2I_UBC9	0	1	7	0.438897	0.802792	0.0953968
REACTOME_DEACTIVATION_OF_THE_BETA_CATENIN_TRANSACTIVATING_COMPLEX	3	4	42	0.428633	0.802792	0.0953968	BCL9:TLE3:UBC
REACTOME_SUMOYLATION_OF_TRANSCRIPTION_COFACTORS	3	4	43	0.446757	0.802792	0.0953968	PHC2:BMI1:NRIP1
REACTOME_EPHB_MEDIATED_FORWARD_SIGNALING	3	4	42	0.428633	0.802792	0.0953968	FYN:TIAM1:YES1
REACTOME_SUMOYLATION_OF_INTRACELLULAR_RECEPTORS	2	3	30	0.428246	0.802792	0.0953968	RARA:NR4A2
REACTOME_NECTIN_NECL_TRANS_HETERODIMERIZATION	0	1	7	0.438897	0.802792	0.0953968
REACTOME_ZINC_EFFLUX_AND_COMPARTMENTALIZATION_BY_THE_SLC30_FAMILY	0	1	7	0.438897	0.802792	0.0953968
REACTOME_NAPLUS_CL_DEPENDENT_NEUROTRANSMITTER_TRANSPORTERS	1	2	19	0.450935	0.802792	0.0953968	SLC6A9
REACTOME_RSK_ACTIVATION	0	1	7	0.438897	0.802792	0.0953968
REACTOME_NRCAM_INTERACTIONS	0	1	7	0.438897	0.802792	0.0953968
REACTOME_AUF1_HNRNP_D0_BINDS_AND_DESTABILIZES_MRNA	4	5	55	0.443428	0.802792	0.0953968	PSME4:PSMA6:PSMA2:UBC
REACTOME_TRANSCRIPTIONAL_REGULATION_OF_PLURIPOTENT_STEM_CELLS	2	3	31	0.449724	0.802792	0.0953968	FOXP1:NR6A1
REACTOME_DEGRADATION_OF_AXIN	4	5	55	0.443428	0.802792	0.0953968	PSME4:PSMA6:PSMA2:UBC
REACTOME_PHASE_1_INACTIVATION_OF_FAST_NAPLUS_CHANNELS	0	1	7	0.438897	0.802792	0.0953968
REACTOME_RHO_GTPASES_ACTIVATE_CIT	1	2	19	0.450935	0.802792	0.0953968	RHOB
REACTOME_RHO_GTPASES_ACTIVATE_ROCKS	1	2	19	0.450935	0.802792	0.0953968	RHOB
REACTOME_ACTIVATION_OF_SMO	1	2	18	0.423137	0.802792	0.0953968	CSNK1A1
REACTOME_GLI_PROTEINS_BIND_PROMOTERS_OF_HH_RESPONSIVE_GENES_TO_PROMOTE_TRANSCRIPTION	0	1	7	0.438897	0.802792	0.0953968
REACTOME_SIGNALING_BY_LIGAND_RESPONSIVE_EGFR_VARIANTS_IN_CANCER	1	2	18	0.423137	0.802792	0.0953968	UBC
REACTOME_FRUCTOSE_METABOLISM	0	1	7	0.438897	0.802792	0.0953968
REACTOME_VESICLE_MEDIATED_TRANSPORT	58	58	723	0.423857	0.802792	0.0953968	RAB27A:SYNJ2:RAB21:CD59:TMED2:KIF9:SNX5:APOL1:CNIH1:ARFGAP1:GOSR2:CPD:GOSR1:PPP6R3:PRKAB1:MAN1A1:EXOC2:SEC24A:RAB9A:GGA3:TBC1D20:SNX9:NAPG:TMED7:UBQLN1:COG2:STX6:VPS36:KDELR2:TOR1B:SEC31A:GALNT1:APP:GOLGA4:SURF4:SEC16A:USP6NL:HYOU1:UBC:VPS37A:RHOBTB3:RAB8B:HSP90B1:VPS37C:FTH1:ARF4:TMED10:DENND4A:MCFD2:GJC1:TMED9:BICD2:FNBP1:F5:ANKRD28:TXNDC5:ARFGAP3:SEC22B
REACTOME_NEGATIVE_REGULATION_OF_FGFR4_SIGNALING	2	3	31	0.449724	0.802792	0.0953968	PPP2CB:UBC
REACTOME_DISEASES_OF_METABOLISM	8	9	104	0.44208	0.802792	0.0953968	GCLC:GCLM:CYP27B1:MTRR:FDX1:UBC:MMAA:RPIA
REACTOME_SURFACTANT_METABOLISM	2	3	30	0.428246	0.802792	0.0953968	CCDC59:ADORA2B
REACTOME_HIGHLY_SODIUM_PERMEABLE_ACETYLCHOLINE_NICOTINIC_RECEPTORS	0	1	7	0.438897	0.802792	0.0953968
REACTOME_TP53_REGULATES_TRANSCRIPTION_OF_GENES_INVOLVED_IN_G2_CELL_CYCLE_ARREST	1	2	18	0.423137	0.802792	0.0953968	GADD45A
REACTOME_GLYCEROPHOSPHOLIPID_CATABOLISM	0	1	7	0.438897	0.802792	0.0953968
REACTOME_SIGNALING_BY_FGFR2_IIIA_TM	1	2	19	0.450935	0.802792	0.0953968	NCBP2
REACTOME_REGULATION_OF_RUNX3_EXPRESSION_AND_ACTIVITY	4	5	55	0.443428	0.802792	0.0953968	PSMA6:PSMA2:MDM2:UBC
REACTOME_INTERLEUKIN_36_PATHWAY	0	1	7	0.438897	0.802792	0.0953968
REACTOME_LOSS_OF_MECP2_BINDING_ABILITY_TO_THE_NCOR_SMRT_COMPLEX	0	1	7	0.438897	0.802792	0.0953968
REACTOME_MECP2_REGULATES_NEURONAL_RECEPTORS_AND_CHANNELS	1	2	18	0.423137	0.802792	0.0953968	HDAC2
REACTOME_ERYTHROPOIETIN_ACTIVATES_PHOSPHOLIPASE_C_GAMMA_PLCG	0	1	7	0.438897	0.802792	0.0953968
REACTOME_ACTIVATED_NTRK2_SIGNALS_THROUGH_PI3K	0	1	7	0.438897	0.802792	0.0953968
REACTOME_TYSND1_CLEAVES_PEROXISOMAL_PROTEINS	0	1	7	0.438897	0.802792	0.0953968
REACTOME_REGULATION_OF_RAS_BY_GAPS	5	6	68	0.454424	0.808045	0.0925645	CUL3:PSME4:PSMA6:PSMA2:UBC
REACTOME_INHIBITION_OF_THE_PROTEOLYTIC_ACTIVITY_OF_APC_C_REQUIRED_FOR_THE_ONSET_OF_ANAPHASE_BY_MITOTIC_SPINDLE_CHECKPOINT_COMPONENTS	1	2	20	0.477953	0.811395	0.0907679	UBE2D1
REACTOME_GLYCOSPHINGOLIPID_METABOLISM	3	4	45	0.482427	0.811395	0.0907679	SMPD2:UGCG:B3GALNT1
REACTOME_SEMA4D_INDUCED_CELL_MIGRATION_AND_GROWTH_CONE_COLLAPSE	1	2	20	0.477953	0.811395	0.0907679	RHOB
REACTOME_SIGNALING_BY_NOTCH	19	20	244	0.470714	0.811395	0.0907679	MAMLD1:SEL1L:TMED2:GZMB:HIF1A:PSMA6:PSMA2:FBXW7:CCND1:SKP1:AGO2:NOTCH2:MYC:TLE3:FURIN:UBC:ADAM17:RBPJ:HDAC2
REACTOME_POLB_DEPENDENT_LONG_PATCH_BASE_EXCISION_REPAIR	0	1	8	0.483373	0.811395	0.0907679
REACTOME_CROSS_PRESENTATION_OF_PARTICULATE_EXOGENOUS_ANTIGENS_PHAGOSOMES	0	1	8	0.483373	0.811395	0.0907679
REACTOME_AMPK_INHIBITS_CHREBP_TRANSCRIPTIONAL_ACTIVATION_ACTIVITY	0	1	8	0.483373	0.811395	0.0907679
REACTOME_CHREBP_ACTIVATES_METABOLIC_GENE_EXPRESSION	0	1	8	0.483373	0.811395	0.0907679
REACTOME_LECTIN_PATHWAY_OF_COMPLEMENT_ACTIVATION	0	1	8	0.483373	0.811395	0.0907679
REACTOME_TERMINAL_PATHWAY_OF_COMPLEMENT	0	1	8	0.483373	0.811395	0.0907679
REACTOME_REGULATION_OF_GENE_EXPRESSION_IN_EARLY_PANCREATIC_PRECURSOR_CELLS	0	1	8	0.483373	0.811395	0.0907679
REACTOME_SYNTHESIS_OF_EPOXY_EET_AND_DIHYDROXYEICOSATRIENOIC_ACIDS_DHET	0	1	8	0.483373	0.811395	0.0907679
REACTOME_UBIQUINOL_BIOSYNTHESIS	0	1	8	0.483373	0.811395	0.0907679
REACTOME_METABOLISM_OF_INGESTED_SEMET_SEC_MESEC_INTO_H2SE	0	1	8	0.483373	0.811395	0.0907679
REACTOME_STIMULI_SENSING_CHANNELS	8	9	106	0.465087	0.811395	0.0907679	CLCN6:WNK1:TRPM7:SGK1:UBC:SLC9B2:WNK2:CLCN5
REACTOME_SUMOYLATION_OF_TRANSCRIPTION_FACTORS	1	2	20	0.477953	0.811395	0.0907679	MDM2
REACTOME_DEFECTS_IN_BIOTIN_BTN_METABOLISM	0	1	8	0.483373	0.811395	0.0907679
REACTOME_DEFECTIVE_CHST14_CAUSES_EDS_MUSCULOCONTRACTURAL_TYPE	0	1	8	0.483373	0.811395	0.0907679
REACTOME_DEFECTIVE_CHST6_CAUSES_MCDC1	0	1	8	0.483373	0.811395	0.0907679
REACTOME_DEFECTIVE_ST3GAL3_CAUSES_MCT12_AND_EIEE15	0	1	8	0.483373	0.811395	0.0907679
REACTOME_DEFECTIVE_B4GALT1_CAUSES_B4GALT1_CDG_CDG_2D	0	1	8	0.483373	0.811395	0.0907679
REACTOME_RECEPTOR_TYPE_TYROSINE_PROTEIN_PHOSPHATASES	1	2	20	0.477953	0.811395	0.0907679	PPFIA1
REACTOME_OREXIN_AND_NEUROPEPTIDES_FF_AND_QRFP_BIND_TO_THEIR_RESPECTIVE_RECEPTORS	0	1	8	0.483373	0.811395	0.0907679
REACTOME_SEMA4D_MEDIATED_INHIBITION_OF_CELL_ATTACHMENT_AND_MIGRATION	0	1	8	0.483373	0.811395	0.0907679
REACTOME_NETRIN_MEDIATED_REPULSION_SIGNALS	0	1	8	0.483373	0.811395	0.0907679
REACTOME_INACTIVATION_OF_CDC42_AND_RAC1	0	1	8	0.483373	0.811395	0.0907679
REACTOME_ROLE_OF_ABL_IN_ROBO_SLIT_SIGNALING	0	1	8	0.483373	0.811395	0.0907679
REACTOME_FATTY_ACIDS_BOUND_TO_GPR40_FFAR1_REGULATE_INSULIN_SECRETION	0	1	8	0.483373	0.811395	0.0907679
REACTOME_RAS_ACTIVATION_UPON_CA2PLUS_INFLUX_THROUGH_NMDA_RECEPTOR	1	2	20	0.477953	0.811395	0.0907679	CAMK2D
REACTOME_RELAXIN_RECEPTORS	0	1	8	0.483373	0.811395	0.0907679
REACTOME_RNF_MUTANTS_SHOW_ENHANCED_WNT_SIGNALING_AND_PROLIFERATION	0	1	8	0.483373	0.811395	0.0907679
REACTOME_PHASE_3_RAPID_REPOLARISATION	0	1	8	0.483373	0.811395	0.0907679
REACTOME_DEFECTIVE_TPR_MAY_CONFER_SUSCEPTIBILITY_TOWARDS_THYROID_PAPILLARY_CARCINOMA_TPC	2	3	32	0.470867	0.811395	0.0907679	GCK:RANBP2
REACTOME_LIGAND_RECEPTOR_INTERACTIONS	0	1	8	0.483373	0.811395	0.0907679
REACTOME_TERMINATION_OF_TRANSLESION_DNA_SYNTHESIS	2	3	32	0.470867	0.811395	0.0907679	POLE4:UBC
REACTOME_DEFECTIVE_CSF2RB_CAUSES_PULMONARY_SURFACTANT_METABOLISM_DYSFUNCTION_5_SMDP5	0	1	8	0.483373	0.811395	0.0907679
REACTOME_HISTIDINE_CATABOLISM	0	1	8	0.483373	0.811395	0.0907679
REACTOME_MRNA_EDITING:_C_TO_U_CONVERSION	0	1	8	0.483373	0.811395	0.0907679
REACTOME_DNA_DAMAGE_REVERSAL	0	1	8	0.483373	0.811395	0.0907679
REACTOME_SYNTHESIS_OF_KETONE_BODIES	0	1	8	0.483373	0.811395	0.0907679
REACTOME_TRANSPORT_OF_FATTY_ACIDS	0	1	8	0.483373	0.811395	0.0907679
REACTOME_TBC_RABGAPS	3	4	44	0.464697	0.811395	0.0907679	GGA3:TBC1D20:RAB8B
REACTOME_RUNX2_REGULATES_GENES_INVOLVED_IN_CELL_MIGRATION	0	1	8	0.483373	0.811395	0.0907679
REACTOME_REGULATION_OF_PTEN_STABILITY_AND_ACTIVITY	5	6	69	0.46869	0.811395	0.0907679	PSME4:NEDD4:PSMA6:PSMA2:UBC
REACTOME_HDL_ASSEMBLY	0	1	8	0.483373	0.811395	0.0907679
REACTOME_PLASMA_LIPOPROTEIN_REMODELING	2	3	32	0.470867	0.811395	0.0907679	FURIN:LPL
REACTOME_NONCANONICAL_ACTIVATION_OF_NOTCH3	0	1	8	0.483373	0.811395	0.0907679
REACTOME_BIOSYNTHESIS_OF_MARESINS	0	1	8	0.483373	0.811395	0.0907679
REACTOME_MECP2_REGULATES_TRANSCRIPTION_OF_NEURONAL_LIGANDS	0	1	8	0.483373	0.811395	0.0907679
REACTOME_ACTIVATED_NTRK3_SIGNALS_THROUGH_RAS	0	1	8	0.483373	0.811395	0.0907679
REACTOME_SIGNALING_BY_RAS_MUTANTS	4	5	58	0.49057	0.822556	0.0848347	MARK3:APBB1IP:KSR1:CAMK2D
REACTOME_NEGATIVE_REGULATION_OF_FGFR1_SIGNALING	2	3	33	0.491633	0.823417	0.0843801	PPP2CB:UBC
REACTOME_ORC1_REMOVAL_FROM_CHROMATIN	5	6	71	0.496897	0.831305	0.0802398	PSME4:PSMA6:PSMA2:SKP1:UBC
REACTOME_PHASE_II_CONJUGATION_OF_COMPOUNDS	8	9	109	0.499233	0.834281	0.0786877	GCLC:GCLM:IMPAD1:PODXL2:MTRR:TPST2:CHAC1:MAT2A
REACTOME_NEF_MEDIATES_DOWN_MODULATION_OF_CELL_SURFACE_RECEPTORS_BY_RECRUITING_THEM_TO_CLATHRIN_ADAPTERS	1	2	21	0.504142	0.836888	0.0773328	B2M
REACTOME_REGULATION_OF_GENE_EXPRESSION_IN_BETA_CELLS	1	2	21	0.504142	0.836888	0.0773328	GCK
REACTOME_SYNTHESIS_OF_LEUKOTRIENES_LT_AND_EOXINS_EX	1	2	21	0.504142	0.836888	0.0773328	ABCC1
REACTOME_UNBLOCKING_OF_NMDA_RECEPTORS_GLUTAMATE_BINDING_AND_ACTIVATION	1	2	21	0.504142	0.836888	0.0773328	CAMK2D
REACTOME_PCNA_DEPENDENT_LONG_PATCH_BASE_EXCISION_REPAIR	1	2	21	0.504142	0.836888	0.0773328	POLE4
REACTOME_NEGATIVE_REGULATION_OF_NMDA_RECEPTOR_MEDIATED_NEURONAL_TRANSMISSION	1	2	21	0.504142	0.836888	0.0773328	CAMK2D
REACTOME_HS_GAG_DEGRADATION	1	2	22	0.529464	0.838084	0.0767122	AGRN
REACTOME_KERATAN_SULFATE_KERATIN_METABOLISM	2	3	34	0.511989	0.838084	0.0767122	B4GALT5:B3GNT2
REACTOME_GLYCOSAMINOGLYCAN_METABOLISM	9	10	124	0.524562	0.838084	0.0767122	CD44:B4GALT7:CHPF2:CHST3:CHSY1:B4GALT5:B3GNT2:B3GALT6:AGRN
REACTOME_ACYL_CHAIN_REMODELLING_OF_PS	1	2	22	0.529464	0.838084	0.0767122	PLA2G12A
REACTOME_CDK_MEDIATED_PHOSPHORYLATION_AND_REMOVAL_OF_CDC6	5	6	72	0.51081	0.838084	0.0767122	PSME4:UBE2D1:PSMA6:PSMA2:UBC
REACTOME_PI3K_AKT_ACTIVATION	0	1	9	0.524326	0.838084	0.0767122
REACTOME_E2F_ENABLED_INHIBITION_OF_PRE_REPLICATION_COMPLEX_FORMATION	0	1	9	0.524326	0.838084	0.0767122
REACTOME_CITRIC_ACID_CYCLE_TCA_CYCLE	1	2	22	0.529464	0.838084	0.0767122	ME3
REACTOME_REGULATION_OF_MITOTIC_CELL_CYCLE	6	7	86	0.527566	0.838084	0.0767122	PSME4:UBE2D1:PSMA6:PSMA2:SKP1:UBC
REACTOME_NITRIC_OXIDE_STIMULATES_GUANYLATE_CYCLASE	1	2	22	0.529464	0.838084	0.0767122	ITPR1
REACTOME_E2F_MEDIATED_REGULATION_OF_DNA_REPLICATION	1	2	22	0.529464	0.838084	0.0767122	PPP2CB
REACTOME_MAPK1_ERK2_ACTIVATION	0	1	9	0.524326	0.838084	0.0767122
REACTOME_ERYTHROCYTES_TAKE_UP_OXYGEN_AND_RELEASE_CARBON_DIOXIDE	0	1	9	0.524326	0.838084	0.0767122
REACTOME_SHC1_EVENTS_IN_ERBB2_SIGNALING	1	2	22	0.529464	0.838084	0.0767122	PRKCD
REACTOME_CA2PLUS_ACTIVATED_KPLUS_CHANNELS	0	1	9	0.524326	0.838084	0.0767122
REACTOME_SPERM_MOTILITY_AND_TAXES	0	1	9	0.524326	0.838084	0.0767122
REACTOME_INTRINSIC_PATHWAY_OF_FIBRIN_CLOT_FORMATION	1	2	22	0.529464	0.838084	0.0767122	SERPINE2
REACTOME_HYDROLYSIS_OF_LPC	0	1	9	0.524326	0.838084	0.0767122
REACTOME_AMINO_ACID_CONJUGATION	0	1	9	0.524326	0.838084	0.0767122
REACTOME_NEF_MEDIATED_CD4_DOWN_REGULATION	0	1	9	0.524326	0.838084	0.0767122
REACTOME_APC_C:CDH1_MEDIATED_DEGRADATION_OF_CDC20_AND_OTHER_APC_C:CDH1_TARGETED_PROTEINS_IN_LATE_MITOSIS_EARLY_G1	5	6	72	0.51081	0.838084	0.0767122	PSME4:UBE2D1:PSMA6:PSMA2:UBC
REACTOME_CALCINEURIN_ACTIVATES_NFAT	0	1	9	0.524326	0.838084	0.0767122
REACTOME_EGFR_INTERACTS_WITH_PHOSPHOLIPASE_C_GAMMA	0	1	9	0.524326	0.838084	0.0767122
REACTOME_SYNTHESIS_OF_5_EICOSATETRAENOIC_ACIDS	0	1	9	0.524326	0.838084	0.0767122
REACTOME_SYNTHESIS_OF_16_20_HYDROXYEICOSATETRAENOIC_ACIDS_HETE	0	1	9	0.524326	0.838084	0.0767122
REACTOME_EGFR_TRANSACTIVATION_BY_GASTRIN	0	1	9	0.524326	0.838084	0.0767122
REACTOME_TRIF_MEDIATED_PROGRAMMED_CELL_DEATH	0	1	9	0.524326	0.838084	0.0767122
REACTOME_FCERI_MEDIATED_NF_KB_ACTIVATION	10	11	136	0.51719	0.838084	0.0767122	TAB2:PSME4:UBE2D1:PSMA6:NFKBIA:PSMA2:NFKB1:SKP1:UBC:RELA
REACTOME_BETA_OXIDATION_OF_PRISTANOYL_COA	0	1	9	0.524326	0.838084	0.0767122
REACTOME_ADRENOCEPTORS	0	1	9	0.524326	0.838084	0.0767122
REACTOME_ADP_SIGNALLING_THROUGH_P2Y_PURINOCEPTOR_12	1	2	22	0.529464	0.838084	0.0767122	GNAI1
REACTOME_TRANSPORT_OF_BILE_SALTS_AND_ORGANIC_ACIDS_METAL_IONS_AND_AMINE_COMPOUNDS	6	7	86	0.527566	0.838084	0.0767122	SLC39A14:SLC41A2:SLC39A6:SLC39A3:SLC16A1:SLC6A9
REACTOME_SODIUM_PROTON_EXCHANGERS	0	1	9	0.524326	0.838084	0.0767122
REACTOME_MULTIFUNCTIONAL_ANION_EXCHANGERS	0	1	9	0.524326	0.838084	0.0767122
REACTOME_CHL1_INTERACTIONS	0	1	9	0.524326	0.838084	0.0767122
REACTOME_SIGNALING_BY_WNT_IN_CANCER	2	3	34	0.511989	0.838084	0.0767122	PPP2CB:CSNK1A1
REACTOME_HEDGEHOG_ON_STATE	6	7	86	0.527566	0.838084	0.0767122	CUL3:PSME4:PSMA6:PSMA2:CSNK1A1:UBC
REACTOME_NEGATIVE_REGULATION_OF_FGFR2_SIGNALING	2	3	34	0.511989	0.838084	0.0767122	PPP2CB:UBC
REACTOME_DISEASES_OF_CARBOHYDRATE_METABOLISM	2	3	34	0.511989	0.838084	0.0767122	UBC:RPIA
REACTOME_PI5P_REGULATES_TP53_ACETYLATION	0	1	9	0.524326	0.838084	0.0767122
REACTOME_E3_UBIQUITIN_LIGASES_UBIQUITINATE_TARGET_PROTEINS	4	5	59	0.505968	0.838084	0.0767122	UBE2D1:UBE2D3:PEX5:UBC
REACTOME_CREB3_FACTORS_ACTIVATE_GENES	0	1	9	0.524326	0.838084	0.0767122
REACTOME_ROBO_RECEPTORS_BIND_AKAP5	0	1	9	0.524326	0.838084	0.0767122
REACTOME_ACTIVATED_NTRK2_SIGNALS_THROUGH_RAS	0	1	9	0.524326	0.838084	0.0767122
REACTOME_GPVI_MEDIATED_ACTIVATION_CASCADE	2	3	35	0.531905	0.838337	0.0765815	FYN:RHOB
REACTOME_LYSOSOME_VESICLE_BIOGENESIS	2	3	35	0.531905	0.838337	0.0765815	APP:TXNDC5
REACTOME_G_ALPHA_Z_SIGNALLING_EVENTS	3	4	48	0.534097	0.838337	0.0765815	GNAI1:RGS16:PRKCD
REACTOME_INOSITOL_PHOSPHATE_METABOLISM	3	4	48	0.534097	0.838337	0.0765815	ITPKC:NUDT4:NUDT11
REACTOME_SIGNALING_BY_NTRKS	7	8	99	0.530265	0.838337	0.0765815	FYN:PPP2CB:DUSP4:ATF1:DUSP6:FURIN:TIAM1
REACTOME_FORMATION_OF_HIV_ELONGATION_COMPLEX_IN_THE_ABSENCE_OF_HIV_TAT	3	4	48	0.534097	0.838337	0.0765815	ELL:NCBP2:CCNT1
REACTOME_HDMS_DEMETHYLATE_HISTONES	3	4	48	0.534097	0.838337	0.0765815	KDM5B:KDM6B:ARID5B
REACTOME_DNA_DAMAGE_BYPASS	3	4	48	0.534097	0.838337	0.0765815	POLE4:CUL4A:UBC
REACTOME_RNA_POLYMERASE_II_TRANSCRIPTION_ELONGATION	4	5	61	0.536184	0.840732	0.0753424	ELL:NCBP2:CCNT1:EAF1
REACTOME_APOPTOTIC_CLEAVAGE_OF_CELLULAR_PROTEINS	2	4	38	0.588777	0.84292	0.0742136	LMNA:PRKCD
REACTOME_ANDROGEN_BIOSYNTHESIS	0	1	11	0.596762	0.84292	0.0742136
REACTOME_CROSS_PRESENTATION_OF_SOLUBLE_EXOGENOUS_ANTIGENS_ENDOSOMES	3	4	50	0.567071	0.84292	0.0742136	PSME4:PSMA6:PSMA2
REACTOME_TETRAHYDROBIOPTERIN_BH4_SYNTHESIS_RECYCLING_SALVAGE_AND_REGULATION	0	1	10	0.562037	0.84292	0.0742136
REACTOME_RESOLUTION_OF_AP_SITES_VIA_THE_MULTIPLE_NUCLEOTIDE_PATCH_REPLACEMENT_PATHWAY	1	2	25	0.599997	0.84292	0.0742136	POLE4
REACTOME_SIGNALING_BY_EGFR_IN_CANCER	1	2	24	0.577404	0.84292	0.0742136	UBC
REACTOME_PI3K_EVENTS_IN_ERBB4_SIGNALING	0	1	10	0.562037	0.84292	0.0742136
REACTOME_PRE_NOTCH_EXPRESSION_AND_PROCESSING	8	10	118	0.597096	0.84292	0.0742136	MAMLD1:SEL1L:TMED2:CCND1:AGO2:NOTCH2:FURIN:RBPJ
REACTOME_SIGNALING_BY_NOTCH3	3	4	49	0.550743	0.84292	0.0742136	MAMLD1:UBC:RBPJ
REACTOME_SYNTHESIS_OF_PIPS_AT_THE_LATE_ENDOSOME_MEMBRANE	0	1	11	0.596762	0.84292	0.0742136
REACTOME_ABACAVIR_TRANSPORT_AND_METABOLISM	0	1	10	0.562037	0.84292	0.0742136
REACTOME_XENOBIOTICS	1	2	24	0.577404	0.84292	0.0742136	AHR
REACTOME_APOPTOTIC_CLEAVAGE_OF_CELL_ADHESION_PROTEINS	0	1	11	0.596762	0.84292	0.0742136
REACTOME_ADENYLATE_CYCLASE_ACTIVATING_PATHWAY	0	1	10	0.562037	0.84292	0.0742136
REACTOME_DARPP_32_EVENTS	1	2	24	0.577404	0.84292	0.0742136	PPP2CB
REACTOME_MRNA_SPLICING_MINOR_PATHWAY	3	5	52	0.598711	0.84292	0.0742136	NCBP2:SRSF7:SRSF6
REACTOME_REGULATION_OF_INSULIN_SECRETION	5	7	78	0.590818	0.84292	0.0742136	ACSL4:STX1A:GLP1R:GNAI1:ITPR1
REACTOME_SEMA4D_IN_SEMAPHORIN_SIGNALING	1	2	24	0.577404	0.84292	0.0742136	RHOB
REACTOME_IONOTROPIC_ACTIVITY_OF_KAINATE_RECEPTORS	0	1	10	0.562037	0.84292	0.0742136
REACTOME_INCRETIN_SYNTHESIS_SECRETION_AND_INACTIVATION	1	2	23	0.55389	0.84292	0.0742136	SEC11C
REACTOME_DSCAM_INTERACTIONS	0	1	11	0.596762	0.84292	0.0742136
REACTOME_ION_CHANNEL_TRANSPORT	13	15	183	0.594664	0.84292	0.0742136	CLCN6:WNK1:TRPM7:SGK1:ATP1B1:CAMK2D:UBC:ATP1A1:SLC9B2:WNK2:CLCN5:ATP6V0A2:PLN
REACTOME_SIGNAL_ATTENUATION	0	1	10	0.562037	0.84292	0.0742136
REACTOME_INTERACTIONS_OF_VPR_WITH_HOST_CELLULAR_PROTEINS	2	3	37	0.570318	0.84292	0.0742136	KPNA1:RANBP2
REACTOME_PLATELET_ACTIVATION_SIGNALING_AND_AGGREGATION	19	21	260	0.589046	0.84292	0.0742136	FYN:HSPA5:APBB1IP:PHACTR2:VEGFA:SRGN:ABCC4:GNAI1:APP:RHOB:MANF:ITPR1:CD109:PRKCD:IGF2:CHID1:FAM3C:PDGFA:F5
REACTOME_DIGESTION_OF_DIETARY_CARBOHYDRATE	0	1	11	0.596762	0.84292	0.0742136
REACTOME_APOPTOTIC_EXECUTION_PHASE	3	5	52	0.598711	0.84292	0.0742136	KPNA1:LMNA:PRKCD
REACTOME_MAPK3_ERK1_ACTIVATION	0	1	10	0.562037	0.84292	0.0742136
REACTOME_NEUROTRANSMITTER_CLEARANCE	0	1	10	0.562037	0.84292	0.0742136
REACTOME_ALPHA_DEFENSINS	0	1	10	0.562037	0.84292	0.0742136
REACTOME_TRIGLYCERIDE_CATABOLISM	1	2	24	0.577404	0.84292	0.0742136	FABP5
REACTOME_ABORTIVE_ELONGATION_OF_HIV_1_TRANSCRIPT_IN_THE_ABSENCE_OF_TAT	1	2	23	0.55389	0.84292	0.0742136	NCBP2
REACTOME_HIV_ELONGATION_ARREST_AND_RECOVERY	2	3	36	0.551355	0.84292	0.0742136	ELL:CCNT1
REACTOME_FRS2_MEDIATED_ACTIVATION	0	1	10	0.562037	0.84292	0.0742136
REACTOME_PROCESSIVE_SYNTHESIS_ON_THE_C_STRAND_OF_THE_TELOMERE	0	1	11	0.596762	0.84292	0.0742136
REACTOME_TELOMERE_C_STRAND_LAGGING_STRAND_SYNTHESIS	1	2	24	0.577404	0.84292	0.0742136	POLE4
REACTOME_ACTIVATION_OF_APC_C_AND_APC_C:CDC20_MEDIATED_DEGRADATION_OF_MITOTIC_PROTEINS	5	7	76	0.564882	0.84292	0.0742136	PSME4:UBE2D1:PSMA6:PSMA2:UBC
REACTOME_SIGNALING_BY_EGFR	3	4	49	0.550743	0.84292	0.0742136	UBC:ADAM17:SPRY1
REACTOME_HEME_BIOSYNTHESIS	0	1	11	0.596762	0.84292	0.0742136
REACTOME_FGFR2B_LIGAND_BINDING_AND_ACTIVATION	0	1	10	0.562037	0.84292	0.0742136
REACTOME_P75NTR_REGULATES_AXONOGENESIS	0	1	10	0.562037	0.84292	0.0742136
REACTOME_SIGNALING_BY_VEGF	7	9	105	0.598536	0.84292	0.0742136	FYN:CTNNA1:FLT1:VEGFA:ITPR1:PRKCD:PRR5
REACTOME_BIOTIN_TRANSPORT_AND_METABOLISM	0	1	11	0.596762	0.84292	0.0742136
REACTOME_DERMATAN_SULFATE_BIOSYNTHESIS	0	1	11	0.596762	0.84292	0.0742136
REACTOME_ENOS_ACTIVATION	0	1	11	0.596762	0.84292	0.0742136
REACTOME_THYROXINE_BIOSYNTHESIS	0	1	10	0.562037	0.84292	0.0742136
REACTOME_CYP2E1_REACTIONS	0	1	11	0.596762	0.84292	0.0742136
REACTOME_MUCOPOLYSACCHARIDOSES	0	1	11	0.596762	0.84292	0.0742136
REACTOME_PI3K_AKT_SIGNALING_IN_CANCER	7	9	102	0.564985	0.84292	0.0742136	FYN:NR4A1:CDKN1A:MDM2:ICOS:PRR5:PDGFA
REACTOME_ESTABLISHMENT_OF_SISTER_CHROMATID_COHESION	0	1	11	0.596762	0.84292	0.0742136
REACTOME_COHESIN_LOADING_ONTO_CHROMATIN	0	1	10	0.562037	0.84292	0.0742136
REACTOME_ACTIVATION_OF_THE_PHOTOTRANSDUCTION_CASCADE	0	1	11	0.596762	0.84292	0.0742136
REACTOME_CONDENSATION_OF_PROMETAPHASE_CHROMOSOMES	0	1	11	0.596762	0.84292	0.0742136
REACTOME_INTERACTION_WITH_CUMULUS_CELLS_AND_THE_ZONA_PELLUCIDA	0	1	11	0.596762	0.84292	0.0742136
REACTOME_POU5F1_OCT4_SOX2_NANOG_REPRESS_GENES_RELATED_TO_DIFFERENTIATION	0	1	10	0.562037	0.84292	0.0742136
REACTOME_NETRIN_1_SIGNALING	3	4	50	0.567071	0.84292	0.0742136	FYN:TRIO:SIAH2
REACTOME_NEPHRIN_FAMILY_INTERACTIONS	1	2	23	0.55389	0.84292	0.0742136	FYN
REACTOME_BETA_OXIDATION_OF_VERY_LONG_CHAIN_FATTY_ACIDS	0	1	11	0.596762	0.84292	0.0742136
REACTOME_FOLDING_OF_ACTIN_BY_CCT_TRIC	0	1	10	0.562037	0.84292	0.0742136
REACTOME_EPH_EPHRIN_MEDIATED_REPULSION_OF_CELLS	3	5	51	0.583064	0.84292	0.0742136	FYN:TIAM1:YES1
REACTOME_ACETYLCHOLINE_REGULATES_INSULIN_SECRETION	0	1	10	0.562037	0.84292	0.0742136
REACTOME_CASPASE_ACTIVATION_VIA_DEPENDENCE_RECEPTORS_IN_THE_ABSENCE_OF_LIGAND	0	1	10	0.562037	0.84292	0.0742136
REACTOME_ROLE_OF_SECOND_MESSENGERS_IN_NETRIN_1_SIGNALING	0	1	10	0.562037	0.84292	0.0742136
REACTOME_BICARBONATE_TRANSPORTERS	0	1	10	0.562037	0.84292	0.0742136
REACTOME_SODIUM_CALCIUM_EXCHANGERS	0	1	11	0.596762	0.84292	0.0742136
REACTOME_REGULATION_OF_COMMISSURAL_AXON_PATHFINDING_BY_SLIT_AND_ROBO	0	1	10	0.562037	0.84292	0.0742136
REACTOME_ORGANIC_ANION_TRANSPORTERS	0	1	10	0.562037	0.84292	0.0742136
REACTOME_TYPE_I_HEMIDESMOSOME_ASSEMBLY	0	1	11	0.596762	0.84292	0.0742136
REACTOME_ASYMMETRIC_LOCALIZATION_OF_PCP_PROTEINS	4	6	64	0.579837	0.84292	0.0742136	PSME4:PSMA6:PSMA2:UBC
REACTOME_CHROMATIN_ORGANIZATION	20	22	272	0.582698	0.84292	0.0742136	SETD1A:SETD6:DOT1L:NFKB1:CCND1:CHD4:KDM5B:SMARCA4:KDM6B:ELP3:CLOCK:KANSL2:SETD7:OGT:ARID5B:BRPF1:RELA:EP400:HDAC2:TAF9
REACTOME_ORGANIC_CATION_TRANSPORT	0	1	10	0.562037	0.84292	0.0742136
REACTOME_IRAK4_DEFICIENCY_TLR2_4	0	1	11	0.596762	0.84292	0.0742136
REACTOME_DISORDERS_OF_TRANSMEMBRANE_TRANSPORTERS	13	15	177	0.543087	0.84292	0.0742136	PSME4:SEL1L:DERL2:DERL3:PSMA6:SLC35A2:PSMA2:GCK:ABCB6:UBC:RANBP2:SLC16A1:SLC3A2
REACTOME_CARGO_TRAFFICKING_TO_THE_PERICILIARY_MEMBRANE	3	5	51	0.583064	0.84292	0.0742136	EXOC2:ASAP1:ARF4
REACTOME_RHO_GTPASES_ACTIVATE_KTN1	0	1	11	0.596762	0.84292	0.0742136
REACTOME_SIGNALING_BY_FGFR1	3	4	50	0.567071	0.84292	0.0742136	PPP2CB:FGFRL1:UBC
REACTOME_SIGNALING_BY_FGFR4_IN_DISEASE	0	1	11	0.596762	0.84292	0.0742136
REACTOME_SIGNALING_BY_FGFR1_IN_DISEASE	2	4	38	0.588777	0.84292	0.0742136	LRRFIP1:STAT5A
REACTOME_RHO_GTPASES_ACTIVATE_NADPH_OXIDASES	1	2	24	0.577404	0.84292	0.0742136	PRKCD
REACTOME_HDR_THROUGH_SINGLE_STRAND_ANNEALING_SSA	2	3	37	0.570318	0.84292	0.0742136	ERCC1:WRN
REACTOME_DISEASES_ASSOCIATED_WITH_SURFACTANT_METABOLISM	0	1	10	0.562037	0.84292	0.0742136
REACTOME_INTERLEUKIN_6_FAMILY_SIGNALING	1	2	24	0.577404	0.84292	0.0742136	SOCS3
REACTOME_PROTEIN_PROTEIN_INTERACTIONS_AT_SYNAPSES	6	7	88	0.55251	0.84292	0.0742136	EPB41L2:STX1A:PPFIA1:LIN7C:HOMER1:SIPA1L1
REACTOME_TP53_REGULATES_TRANSCRIPTION_OF_DNA_REPAIR_GENES	4	6	65	0.593892	0.84292	0.0742136	ELL:CCNT1:CDK12:FOS
REACTOME_CDC6_ASSOCIATION_WITH_THE_ORC:ORIGIN_COMPLEX	0	1	11	0.596762	0.84292	0.0742136
REACTOME_SWITCHING_OF_ORIGINS_TO_A_POST_REPLICATIVE_STATE	6	8	90	0.576868	0.84292	0.0742136	PSME4:UBE2D1:PSMA6:PSMA2:SKP1:UBC
REACTOME_UREA_CYCLE	0	1	10	0.562037	0.84292	0.0742136
REACTOME_CREATINE_METABOLISM	0	1	11	0.596762	0.84292	0.0742136
REACTOME_KETONE_BODY_METABOLISM	0	1	10	0.562037	0.84292	0.0742136
REACTOME_MITOCHONDRIAL_FATTY_ACID_BETA_OXIDATION_OF_SATURATED_FATTY_ACIDS	0	1	11	0.596762	0.84292	0.0742136
REACTOME_MET_ACTIVATES_RAS_SIGNALING	0	1	11	0.596762	0.84292	0.0742136
REACTOME_THE_ROLE_OF_GTSE1_IN_G2_M_PROGRESSION_AFTER_G2_CHECKPOINT	5	7	78	0.590818	0.84292	0.0742136	PSME4:PSMA6:PSMA2:CDKN1A:UBC
REACTOME_SIGNALING_BY_FGFR3_FUSIONS_IN_CANCER	0	1	10	0.562037	0.84292	0.0742136
REACTOME_NEGATIVE_REGULATION_OF_ACTIVITY_OF_TFAP2_AP_2_FAMILY_TRANSCRIPTION_FACTORS	0	1	10	0.562037	0.84292	0.0742136
REACTOME_RAB_GERANYLGERANYLATION	4	6	65	0.593892	0.84292	0.0742136	RAB27A:RAB21:RAB9A:RAB8B
REACTOME_MET_ACTIVATES_RAP1_AND_RAC1	0	1	11	0.596762	0.84292	0.0742136
REACTOME_RUNX2_REGULATES_OSTEOBLAST_DIFFERENTIATION	1	2	24	0.577404	0.84292	0.0742136	YES1
REACTOME_NUCLEOBASE_CATABOLISM	2	3	36	0.551355	0.84292	0.0742136	NT5E:ENTPD7
REACTOME_NUCLEOTIDE_SALVAGE	1	2	23	0.55389	0.84292	0.0742136	UCKL1
REACTOME_PHENYLALANINE_AND_TYROSINE_METABOLISM	0	1	11	0.596762	0.84292	0.0742136
REACTOME_CHYLOMICRON_ASSEMBLY	0	1	10	0.562037	0.84292	0.0742136
REACTOME_HDL_REMODELING	0	1	10	0.562037	0.84292	0.0742136
REACTOME_TRIGLYCERIDE_METABOLISM	2	4	38	0.588777	0.84292	0.0742136	DGAT2:FABP5
REACTOME_TRANSCRIPTIONAL_REGULATION_BY_MECP2	4	5	63	0.565526	0.84292	0.0742136	SGK1:AGO2:CAMK2D:HDAC2
REACTOME_SIGNALING_BY_ERYTHROPOIETIN	1	2	25	0.599997	0.84292	0.0742136	STAT5A
REACTOME_NOTCH3_ACTIVATION_AND_TRANSMISSION_OF_SIGNAL_TO_THE_NUCLEUS	1	2	25	0.599997	0.84292	0.0742136	UBC
REACTOME_NOTCH4_ACTIVATION_AND_TRANSMISSION_OF_SIGNAL_TO_THE_NUCLEUS	0	1	11	0.596762	0.84292	0.0742136
REACTOME_INTERLEUKIN_27_SIGNALING	0	1	11	0.596762	0.84292	0.0742136
REACTOME_ACTIVATED_NTRK2_SIGNALS_THROUGH_FRS2_AND_FRS3	0	1	11	0.596762	0.84292	0.0742136
REACTOME_REGULATION_OF_FOXO_TRANSCRIPTIONAL_ACTIVITY_BY_ACETYLATION	0	1	10	0.562037	0.84292	0.0742136
REACTOME_LONG_TERM_POTENTIATION	1	2	23	0.55389	0.84292	0.0742136	CAMK2D
REACTOME_ACTIVATION_OF_NMDA_RECEPTORS_AND_POSTSYNAPTIC_EVENTS	6	8	92	0.600576	0.842943	0.0742018	CAMKK1:CAMKK2:PRKAB1:CAMK2D:LIN7C:KPNA2
REACTOME_GAP_JUNCTION_DEGRADATION	0	1	12	0.628736	0.84755	0.0718346
REACTOME_INSULIN_RECEPTOR_RECYCLING	1	3	26	0.621668	0.84755	0.0718346	ATP6V0A2
REACTOME_PROLONGED_ERK_ACTIVATION_EVENTS	0	1	12	0.628736	0.84755	0.0718346
REACTOME_SYNTHESIS_OF_PIPS_AT_THE_PLASMA_MEMBRANE	3	5	53	0.614001	0.84755	0.0718346	MTMR1:SYNJ2:RUFY1
REACTOME_REVERSIBLE_HYDRATION_OF_CARBON_DIOXIDE	0	1	12	0.628736	0.84755	0.0718346
REACTOME_CASPASE_MEDIATED_CLEAVAGE_OF_CYTOSKELETAL_PROTEINS	0	1	12	0.628736	0.84755	0.0718346
REACTOME_ASSOCIATION_OF_TRIC_CCT_WITH_TARGET_PROTEINS_DURING_BIOSYNTHESIS	2	4	39	0.606718	0.84755	0.0718346	XRN2:FBXW7
REACTOME_HORMONE_LIGAND_BINDING_RECEPTORS	0	1	12	0.628736	0.84755	0.0718346
REACTOME_SEROTONIN_RECEPTORS	0	1	12	0.628736	0.84755	0.0718346
REACTOME_PURINE_RIBONUCLEOSIDE_MONOPHOSPHATE_BIOSYNTHESIS	0	1	12	0.628736	0.84755	0.0718346
REACTOME_FANCONI_ANEMIA_PATHWAY	2	4	39	0.606718	0.84755	0.0718346	ERCC1:UBC
REACTOME_TRANSPORT_OF_INORGANIC_CATIONS_ANIONS_AND_AMINO_ACIDS_OLIGOPEPTIDES	7	9	106	0.609429	0.84755	0.0718346	SLC12A2:SLC7A5:SLC38A1:SLC7A1:SLC20A1:SLC7A11:SLC3A2
REACTOME_FORMATION_OF_FIBRIN_CLOT_CLOTTING_CASCADE	2	4	39	0.606718	0.84755	0.0718346	SERPINE2:F5
REACTOME_TRANSPORT_OF_ORGANIC_ANIONS	0	1	12	0.628736	0.84755	0.0718346
REACTOME_ETHANOL_OXIDATION	0	1	12	0.628736	0.84755	0.0718346
REACTOME_UNWINDING_OF_DNA	0	1	12	0.628736	0.84755	0.0718346
REACTOME_TANDEM_PORE_DOMAIN_POTASSIUM_CHANNELS	0	1	12	0.628736	0.84755	0.0718346
REACTOME_TRANSLESION_SYNTHESIS_BY_Y_FAMILY_DNA_POLYMERASES_BYPASSES_LESIONS_ON_DNA_TEMPLATE	2	4	39	0.606718	0.84755	0.0718346	POLE4:UBC
REACTOME_PRESYNAPTIC_DEPOLARIZATION_AND_CALCIUM_CHANNEL_OPENING	0	1	12	0.628736	0.84755	0.0718346
REACTOME_SYNTHESIS_OF_IP3_AND_IP4_IN_THE_CYTOSOL	1	3	26	0.621668	0.84755	0.0718346	ITPKC
REACTOME_FGFR1C_LIGAND_BINDING_AND_ACTIVATION	0	1	12	0.628736	0.84755	0.0718346
REACTOME_MISCELLANEOUS_SUBSTRATES	0	1	12	0.628736	0.84755	0.0718346
REACTOME_EICOSANOIDS	0	1	12	0.628736	0.84755	0.0718346
REACTOME_DAP12_INTERACTIONS	2	4	40	0.62413	0.84755	0.0718346	FYN:B2M
REACTOME_SUMOYLATION_OF_UBIQUITINYLATION_PROTEINS	2	4	39	0.606718	0.84755	0.0718346	MDM2:RANBP2
REACTOME_G_ALPHA_12_13_SIGNALLING_EVENTS	5	7	80	0.615923	0.84755	0.0718346	TRIO:ARHGEF2:RHOB:TIAM1:ARHGEF3
REACTOME_REDUCTION_OF_CYTOSOLIC_CAPLUSPLUS_LEVELS	0	1	12	0.628736	0.84755	0.0718346
REACTOME_GP1B_IX_V_ACTIVATION_SIGNALLING	0	1	12	0.628736	0.84755	0.0718346
REACTOME_CREB1_PHOSPHORYLATION_THROUGH_THE_ACTIVATION_OF_ADENYLATE_CYCLASE	0	1	12	0.628736	0.84755	0.0718346
REACTOME_NEGATIVE_EPIGENETIC_REGULATION_OF_RRNA_EXPRESSION	7	9	107	0.620169	0.84755	0.0718346	POLR1A:CD3EAP:POLR1B:RRP8:TAF1D:POLR1C:HDAC2
REACTOME_PHYSIOLOGICAL_FACTORS	0	1	12	0.628736	0.84755	0.0718346
REACTOME_DECTIN_2_FAMILY	1	3	26	0.621668	0.84755	0.0718346	FYN
REACTOME_SIGNALING_BY_FGFR3	2	4	40	0.62413	0.84755	0.0718346	PPP2CB:UBC
REACTOME_RESOLUTION_OF_D_LOOP_STRUCTURES_THROUGH_SYNTHESIS_DEPENDENT_STRAND_ANNEALING_SDSA	1	3	26	0.621668	0.84755	0.0718346	WRN
REACTOME_FORMATION_OF_TC_NER_PRE_INCISION_COMPLEX	3	5	53	0.614001	0.84755	0.0718346	CUL4A:UBC:USP7
REACTOME_LYSINE_CATABOLISM	0	1	12	0.628736	0.84755	0.0718346
REACTOME_TRANSPORT_OF_NUCLEOSIDES_AND_FREE_PURINE_AND_PYRIMIDINE_BASES_ACROSS_THE_PLASMA_MEMBRANE	0	1	12	0.628736	0.84755	0.0718346
REACTOME_BUTYROPHILIN_BTN_FAMILY_INTERACTIONS	0	1	12	0.628736	0.84755	0.0718346
REACTOME_VLDLR_INTERNALISATION_AND_DEGRADATION	0	1	12	0.628736	0.84755	0.0718346
REACTOME_ACTIVATION_OF_THE_TFAP2_AP_2_FAMILY_OF_TRANSCRIPTION_FACTORS	0	1	12	0.628736	0.84755	0.0718346
REACTOME_INTERLEUKIN_35_SIGNALLING	0	1	12	0.628736	0.84755	0.0718346
REACTOME_ERYTHROPOIETIN_ACTIVATES_PHOSPHOINOSITIDE_3_KINASE_PI3K	0	1	12	0.628736	0.84755	0.0718346
REACTOME_REGULATION_OF_LOCALIZATION_OF_FOXO_TRANSCRIPTION_FACTORS	0	1	12	0.628736	0.84755	0.0718346
REACTOME_AMYLOID_FIBER_FORMATION	7	9	107	0.620169	0.84755	0.0718346	GGA3:FURIN:APP:UBC:B2M:TSPAN5:SIAH2
REACTOME_S_PHASE	11	13	161	0.630383	0.848738	0.0712265	PSME4:UBE2D1:PSMA6:PSMA2:CCND1:SKP1:POLE4:CDKN1A:E2F5:MYC:UBC
REACTOME_SENESCENCE_ASSOCIATED_SECRETORY_PHENOTYPE_SASP	7	9	108	0.63075	0.848738	0.0712265	UBE2D1:CDK6:NFKB1:CDKN1A:UBC:FOS:RELA
REACTOME_ASSEMBLY_OF_THE_PRE_REPLICATIVE_COMPLEX	4	6	68	0.634436	0.852932	0.0690855	PSME4:PSMA6:PSMA2:UBC
REACTOME_SIGNALING_BY_FGFR4	2	4	41	0.641007	0.860438	0.0652805	PPP2CB:UBC
REACTOME_RNA_POLYMERASE_I_TRANSCRIPTION	7	9	109	0.641167	0.860438	0.0652805	POLR1A:CHD4:CD3EAP:POLR1B:TAF1D:POLR1C:HDAC2
REACTOME_PYRUVATE_METABOLISM_AND_CITRIC_ACID_TCA_CYCLE	3	5	55	0.643473	0.860451	0.0652739	ME3:SLC16A1:PDP2
REACTOME_ACYL_CHAIN_REMODELLING_OF_PC	1	3	27	0.642419	0.860451	0.0652739	PLA2G12A
REACTOME_HEPARAN_SULFATE_HEPARIN_HS_GAG_METABOLISM	3	5	55	0.643473	0.860451	0.0652739	B4GALT7:B3GALT6:AGRN
REACTOME_INTEGRIN_SIGNALING	1	3	27	0.642419	0.860451	0.0652739	APBB1IP
REACTOME_P38MAPK_EVENTS	0	2	13	0.658178	0.865446	0.0627599
REACTOME_THE_ACTIVATION_OF_ARYLSULFATASES	0	2	13	0.658178	0.865446	0.0627599
REACTOME_KERATAN_SULFATE_DEGRADATION	0	2	13	0.658178	0.865446	0.0627599
REACTOME_NCAM1_INTERACTIONS	2	4	42	0.657343	0.865446	0.0627599	PRNP:AGRN
REACTOME_PURINE_SALVAGE	0	2	13	0.658178	0.865446	0.0627599
REACTOME_PASSIVE_TRANSPORT_BY_AQUAPORINS	0	2	13	0.658178	0.865446	0.0627599
REACTOME_FGFR2C_LIGAND_BINDING_AND_ACTIVATION	0	2	13	0.658178	0.865446	0.0627599
REACTOME_O2_CO2_EXCHANGE_IN_ERYTHROCYTES	0	2	13	0.658178	0.865446	0.0627599
REACTOME_FGFR3_LIGAND_BINDING_AND_ACTIVATION	0	2	13	0.658178	0.865446	0.0627599
REACTOME_DISEASES_ASSOCIATED_WITH_VISUAL_TRANSDUCTION	0	2	13	0.658178	0.865446	0.0627599
REACTOME_CYTOSOLIC_IRON_SULFUR_CLUSTER_ASSEMBLY	0	2	13	0.658178	0.865446	0.0627599
REACTOME_IRF3_MEDIATED_INDUCTION_OF_TYPE_I_IFN	0	2	13	0.658178	0.865446	0.0627599
REACTOME_GLUCAGON_LIKE_PEPTIDE_1_GLP1_REGULATES_INSULIN_SECRETION	2	4	42	0.657343	0.865446	0.0627599	GLP1R:ITPR1
REACTOME_ACTIVATION_OF_RAC1	0	2	13	0.658178	0.865446	0.0627599
REACTOME_WNT5A_DEPENDENT_INTERNALIZATION_OF_FZD2_FZD5_AND_ROR2	0	2	13	0.658178	0.865446	0.0627599
REACTOME_CHK1_CHK2_CDS1_MEDIATED_INACTIVATION_OF_CYCLIN_B:CDK1_COMPLEX	0	2	13	0.658178	0.865446	0.0627599
REACTOME_ERBB2_ACTIVATES_PTK6_SIGNALING	0	2	13	0.658178	0.865446	0.0627599
REACTOME_PERVASIVE_DEVELOPMENTAL_DISORDERS	0	2	13	0.658178	0.865446	0.0627599
REACTOME_ASSEMBLY_AND_CELL_SURFACE_PRESENTATION_OF_NMDA_RECEPTORS	2	4	42	0.657343	0.865446	0.0627599	CAMK2D:LIN7C
REACTOME_SYNTHESIS_OF_PC	1	3	28	0.662262	0.866257	0.0623532	MFSD2A
REACTOME_G_PROTEIN_ACTIVATION	1	3	28	0.662262	0.866257	0.0623532	GNAI1
REACTOME_TRP_CHANNELS	1	3	28	0.662262	0.866257	0.0623532	TRPM7
REACTOME_ADRENALINE_NORADRENALINE_INHIBITS_INSULIN_SECRETION	1	3	28	0.662262	0.866257	0.0623532	GNAI1
REACTOME_CREB1_PHOSPHORYLATION_THROUGH_NMDA_RECEPTOR_MEDIATED_ACTIVATION_OF_RAS_SIGNALING	1	3	28	0.662262	0.866257	0.0623532	CAMK2D
REACTOME_O_LINKED_GLYCOSYLATION	7	9	111	0.661495	0.866257	0.0623532	POMT2:GALNT1:B4GALT5:B3GNT2:C1GALT1C1:B3GNT5:GALNT11
REACTOME_SIGNALING_BY_THE_B_CELL_RECEPTOR_BCR	11	14	166	0.672316	0.87742	0.0567925	FYN:PSME4:PSMA6:NFKBIA:PSMA2:NFKB1:SKP1:UBC:ITPR1:REL:RELA
REACTOME_VOLTAGE_GATED_POTASSIUM_CHANNELS	2	4	43	0.673137	0.87742	0.0567925	KCNH4:KCNG3
REACTOME_SUMOYLATION_OF_CHROMATIN_ORGANIZATION_PROTEINS	4	6	71	0.6724	0.87742	0.0567925	PHC2:RANBP2:BMI1:HDAC2
REACTOME_SIGNALING_BY_RETINOIC_ACID	2	4	43	0.673137	0.87742	0.0567925	RARA:FABP5
REACTOME_DNA_REPLICATION_PRE_INITIATION	5	7	85	0.674702	0.878696	0.0561615	PSME4:PSMA6:PSMA2:POLE4:UBC
REACTOME_SHC1_EVENTS_IN_ERBB4_SIGNALING	0	2	14	0.685287	0.878739	0.0561401
REACTOME_CS_DS_DEGRADATION	0	2	14	0.685287	0.878739	0.0561401
REACTOME_ACYL_CHAIN_REMODELLING_OF_PE	1	3	29	0.681209	0.878739	0.0561401	PLA2G12A
REACTOME_RETROGRADE_NEUROTROPHIN_SIGNALLING	0	2	14	0.685287	0.878739	0.0561401
REACTOME_SHC1_EVENTS_IN_EGFR_SIGNALING	0	2	14	0.685287	0.878739	0.0561401
REACTOME_PEPTIDE_HORMONE_BIOSYNTHESIS	0	2	14	0.685287	0.878739	0.0561401
REACTOME_SIGNALING_BY_PDGF	3	5	58	0.684822	0.878739	0.0561401	STAT5A:FURIN:PDGFA
REACTOME_PEROXISOMAL_LIPID_METABOLISM	1	3	29	0.681209	0.878739	0.0561401	SLC27A2
REACTOME_SYNTHESIS_OF_IP2_IP_AND_INS_IN_THE_CYTOSOL	0	2	14	0.685287	0.878739	0.0561401
REACTOME_IMPORT_OF_PALMITOYL_COA_INTO_THE_MITOCHONDRIAL_MATRIX	0	2	14	0.685287	0.878739	0.0561401
REACTOME_INTERCONVERSION_OF_NUCLEOTIDE_DI_AND_TRIPHOSPHATES	1	3	29	0.681209	0.878739	0.0561401	TXNRD1
REACTOME_PIWI_INTERACTING_RNA_PIRNA_BIOGENESIS	1	3	29	0.681209	0.878739	0.0561401	PLD6
REACTOME_HEDGEHOG_OFF_STATE	7	9	113	0.681125	0.878739	0.0561401	PSME4:PSMA6:RPGRIP1L:PSMA2:SKP1:CSNK1A1:UBC
REACTOME_SIGNALING_BY_EGFRVIII_IN_CANCER	0	2	14	0.685287	0.878739	0.0561401
REACTOME_MITOTIC_TELOPHASE_CYTOKINESIS	0	2	14	0.685287	0.878739	0.0561401
REACTOME_LEADING_STRAND_SYNTHESIS	0	2	14	0.685287	0.878739	0.0561401
REACTOME_PTK6_REGULATES_RHO_GTPASES_RAS_GTPASE_AND_MAP_KINASES	0	2	14	0.685287	0.878739	0.0561401
REACTOME_ERYTHROPOIETIN_ACTIVATES_RAS	0	2	14	0.685287	0.878739	0.0561401
REACTOME_GLYCEROPHOSPHOLIPID_BIOSYNTHESIS	8	11	128	0.693736	0.888813	0.0511897	DGAT2:PLA2G12A:ETNK1:GPD1L:AGPAT5:MFSD2A:PTDSS2:PLD6
REACTOME_SIGNALING_BY_FGFR	5	7	87	0.696525	0.890863	0.0501893	PPP2CB:NCBP2:FGFRL1:HNRNPA1:UBC
REACTOME_SIGNALING_BY_FGFR2	4	6	73	0.696216	0.890863	0.0501893	PPP2CB:NCBP2:HNRNPA1:UBC
REACTOME_TIGHT_JUNCTION_INTERACTIONS	1	3	30	0.699278	0.89286	0.0492166	CLDN1
REACTOME_EXTENSION_OF_TELOMERES	1	3	30	0.699278	0.89286	0.0492166	POLE4
REACTOME_PROCESSIVE_SYNTHESIS_ON_THE_LAGGING_STRAND	0	2	15	0.710249	0.896181	0.047604
REACTOME_ORGANIC_CATION_ANION_ZWITTERION_TRANSPORT	0	2	15	0.710249	0.896181	0.047604
REACTOME_ELASTIC_FIBRE_FORMATION	2	4	45	0.703101	0.896181	0.047604	LTBP4:FURIN
REACTOME_SYNTHESIS_OF_BILE_ACIDS_AND_BILE_SALTS_VIA_27_HYDROXYCHOLESTEROL	0	2	15	0.710249	0.896181	0.047604
REACTOME_METABOLISM_OF_NITRIC_OXIDE:_ENOS_ACTIVATION_AND_REGULATION	0	2	15	0.710249	0.896181	0.047604
REACTOME_FATTY_ACIDS	0	2	15	0.710249	0.896181	0.047604
REACTOME_SYNTHESIS_OF_PROSTAGLANDINS_PG_AND_THROMBOXANES_TX	0	2	15	0.710249	0.896181	0.047604
REACTOME_ANCHORING_FIBRIL_FORMATION	0	2	15	0.710249	0.896181	0.047604
REACTOME_NEGATIVE_REGULATION_OF_TCF_DEPENDENT_SIGNALING_BY_WNT_LIGAND_ANTAGONISTS	0	2	15	0.710249	0.896181	0.047604
REACTOME_WNT5A_DEPENDENT_INTERNALIZATION_OF_FZD4	0	2	15	0.710249	0.896181	0.047604
REACTOME_MISMATCH_REPAIR	0	2	15	0.710249	0.896181	0.047604
REACTOME_PHOSPHOLIPASE_C_MEDIATED_CASCADE_FGFR4	0	2	15	0.710249	0.896181	0.047604
REACTOME_ERBB2_REGULATES_CELL_MOTILITY	0	2	15	0.710249	0.896181	0.047604
REACTOME_TRANSCRIPTIONAL_REGULATION_OF_GRANULOPOIESIS	5	7	88	0.707063	0.896181	0.047604	MYB:CDKN1A:RARA:MYC:GFI1
REACTOME_HS_GAG_BIOSYNTHESIS	1	3	31	0.716489	0.89836	0.0465497	AGRN
REACTOME_TRANSFERRIN_ENDOCYTOSIS_AND_RECYCLING	1	3	31	0.716489	0.89836	0.0465497	ATP6V0A2
REACTOME_METABOLISM_OF_CARBOHYDRATES	20	24	293	0.717369	0.89836	0.0465497	CD44:B4GALT7:CHPF2:PFKP:PPP2CB:GCK:GOT1:CHST3:PFKFB2:CHSY1:UBC:RANBP2:RPIA:B4GALT5:ADPGK:PGM2L1:B3GNT2:B3GALT6:AGRN:RPE
REACTOME_INWARDLY_RECTIFYING_KPLUS_CHANNELS	1	3	31	0.716489	0.89836	0.0465497	KCNJ14
REACTOME_SUMOYLATION_OF_DNA_REPLICATION_PROTEINS	2	4	46	0.717276	0.89836	0.0465497	RANBP2:TOP1
REACTOME_RHO_GTPASES_ACTIVATE_IQGAPS	1	3	31	0.716489	0.89836	0.0465497	CTNNA1
REACTOME_RNA_POLYMERASE_I_PROMOTER_ESCAPE	5	8	89	0.717349	0.89836	0.0465497	POLR1A:CD3EAP:POLR1B:TAF1D:POLR1C
REACTOME_RUNX2_REGULATES_BONE_DEVELOPMENT	1	3	31	0.716489	0.89836	0.0465497	YES1
REACTOME_CRISTAE_FORMATION	1	3	31	0.716489	0.89836	0.0465497	CHCHD6
REACTOME_EXTRA_NUCLEAR_ESTROGEN_SIGNALING	4	6	75	0.718813	0.899416	0.0460392	CCND1:GNAI1:FOS:BCL2
REACTOME_CA2PLUS_PATHWAY	3	5	61	0.722677	0.903496	0.0440735	AGO2:MYC:ITPR1
REACTOME_GRB2_EVENTS_IN_ERBB2_SIGNALING	0	2	16	0.733233	0.907611	0.0421003
REACTOME_PI3K_EVENTS_IN_ERBB2_SIGNALING	0	2	16	0.733233	0.907611	0.0421003
REACTOME_SYNTHESIS_OF_PIPS_AT_THE_EARLY_ENDOSOME_MEMBRANE	0	2	16	0.733233	0.907611	0.0421003
REACTOME_SIGNAL_AMPLIFICATION	1	3	32	0.732863	0.907611	0.0421003	GNAI1
REACTOME_RAP1_SIGNALLING	0	2	16	0.733233	0.907611	0.0421003
REACTOME_METABOLISM_OF_PORPHYRINS	0	2	16	0.733233	0.907611	0.0421003
REACTOME_FGFR1_LIGAND_BINDING_AND_ACTIVATION	0	2	16	0.733233	0.907611	0.0421003
REACTOME_POLO_LIKE_KINASE_MEDIATED_EVENTS	0	2	16	0.733233	0.907611	0.0421003
REACTOME_STING_MEDIATED_INDUCTION_OF_HOST_IMMUNE_RESPONSES	0	2	16	0.733233	0.907611	0.0421003
REACTOME_SIGNAL_REGULATORY_PROTEIN_FAMILY_INTERACTIONS	0	2	16	0.733233	0.907611	0.0421003
REACTOME_DEFECTIVE_GALNT3_CAUSES_FAMILIAL_HYPERPHOSPHATEMIC_TUMORAL_CALCINOSIS_HFTC	0	2	16	0.733233	0.907611	0.0421003
REACTOME_RAB_GEFS_EXCHANGE_GTP_FOR_GDP_ON_RABS	5	8	90	0.727383	0.907611	0.0421003	RAB27A:RAB21:RAB9A:RAB8B:DENND4A
REACTOME_PEPTIDE_LIGAND_BINDING_RECEPTORS	12	15	188	0.735641	0.909839	0.0410352	CCL20:ECE1:CXCL9:APP:XCL1:XCL2:ECE2:CXCL3:CXCL10:CXCL11:CCR4:NPW
REACTOME_ACTIVATION_OF_THE_PRE_REPLICATIVE_COMPLEX	1	3	33	0.748427	0.917327	0.0374756	POLE4
REACTOME_SIGNALING_BY_FGFR_IN_DISEASE	3	5	63	0.745976	0.917327	0.0374756	NCBP2:LRRFIP1:STAT5A
REACTOME_NCAM_SIGNALING_FOR_NEURITE_OUT_GROWTH	3	5	63	0.745976	0.917327	0.0374756	FYN:PRNP:AGRN
REACTOME_GLUCAGON_TYPE_LIGAND_RECEPTORS	1	3	33	0.748427	0.917327	0.0374756	GLP1R
REACTOME_ADHERENS_JUNCTIONS_INTERACTIONS	1	3	33	0.748427	0.917327	0.0374756	CTNNA1
REACTOME_FORMATION_OF_THE_EARLY_ELONGATION_COMPLEX	1	3	33	0.748427	0.917327	0.0374756	NCBP2
REACTOME_ACTIVATION_OF_MATRIX_METALLOPROTEINASES	1	3	33	0.748427	0.917327	0.0374756	FURIN
REACTOME_EXPORT_OF_VIRAL_RIBONUCLEOPROTEINS_FROM_NUCLEUS	1	3	33	0.748427	0.917327	0.0374756	RANBP2
REACTOME_FGFR2_MUTANT_RECEPTOR_ACTIVATION	1	3	33	0.748427	0.917327	0.0374756	NCBP2
REACTOME_PCP_CE_PATHWAY	5	8	92	0.746695	0.917327	0.0374756	PSME4:PSMA6:PSMA2:DVL1:UBC
REACTOME_METABOLISM_OF_FAT_SOLUBLE_VITAMINS	2	4	48	0.744043	0.917327	0.0374756	LPL:AGRN
REACTOME_SIGNALING_BY_NTRK1_TRKA	4	7	78	0.750419	0.919018	0.0366759	PPP2CB:DUSP4:ATF1:DUSP6
REACTOME_GAB1_SIGNALOSOME	0	2	17	0.754396	0.920879	0.0357973
REACTOME_PKA_ACTIVATION_IN_GLUCAGON_SIGNALLING	0	2	17	0.754396	0.920879	0.0357973
REACTOME_IL_6_TYPE_CYTOKINE_RECEPTOR_LIGAND_INTERACTIONS	0	2	17	0.754396	0.920879	0.0357973
REACTOME_SIGNALING_BY_NTRK3_TRKC	0	2	17	0.754396	0.920879	0.0357973
REACTOME_METABOLISM_OF_LIPIDS	53	59	738	0.75543	0.921391	0.0355561	NFYA:MSMO1:DGAT2:MTMR1:ACSL4:OSBPL3:SYNJ2:SLC27A5:VAPA:ABCC1:AHR:OSBP:CYP27B1:HMGCS1:HMGCR:SEC24A:SCAP:PRKD3:KDSR:ORMDL2:PLA2G12A:NR1D1:CLOCK:SMPD2:MED4:TGS1:FDX1:ETNK1:SLC27A2:MED9:TNFRSF21:NSDHL:UGCG:MMAA:ACSL1:GPD1L:AGPAT5:MED19:SGPP2:STARD4:FABP5:SGPL1:MFSD2A:B3GALNT1:PTDSS2:HSD11B2:RUFY1:PLD6:INSIG1:MTF1:ACSL5:FAR1:TXNRD1
REACTOME_RAB_REGULATION_OF_TRAFFICKING	7	10	122	0.760375	0.926668	0.0330757	RAB27A:RAB21:RAB9A:GGA3:TBC1D20:RAB8B:DENND4A
REACTOME_INTEGRATION_OF_ENERGY_METABOLISM	6	9	108	0.762016	0.927101	0.0328729	ACSL4:PPP2CB:STX1A:GLP1R:GNAI1:ITPR1
REACTOME_GLUCONEOGENESIS	1	3	34	0.763204	0.927101	0.0328729	GOT1
REACTOME_NUCLEAR_IMPORT_OF_REV_PROTEIN	1	3	34	0.763204	0.927101	0.0328729	RANBP2
REACTOME_RESOLUTION_OF_D_LOOP_STRUCTURES	1	3	34	0.763204	0.927101	0.0328729	WRN
REACTOME_SYNTHESIS_OF_PIPS_AT_THE_GOLGI_MEMBRANE	0	2	18	0.773882	0.930272	0.0313901
REACTOME_GASTRIN_CREB_SIGNALLING_PATHWAY_VIA_PKC_AND_MAPK	0	2	18	0.773882	0.930272	0.0313901
REACTOME_TIE2_SIGNALING	0	2	18	0.773882	0.930272	0.0313901
REACTOME_CYTOCHROME_P450_ARRANGED_BY_SUBSTRATE_TYPE	3	6	65	0.76775	0.930272	0.0313901	AHR:CYP27B1:FDX1
REACTOME_FORMATION_OF_ATP_BY_CHEMIOSMOTIC_COUPLING	0	2	18	0.773882	0.930272	0.0313901
REACTOME_SYNTHESIS_OF_GLYCOSYLPHOSPHATIDYLINOSITOL_GPI	0	2	18	0.773882	0.930272	0.0313901
REACTOME_ABC_TRANSPORTERS_IN_LIPID_HOMEOSTASIS	0	2	18	0.773882	0.930272	0.0313901
REACTOME_METABOLISM_OF_ANGIOTENSINOGEN_TO_ANGIOTENSINS	0	2	18	0.773882	0.930272	0.0313901
REACTOME_METABOLISM_OF_AMINE_DERIVED_HORMONES	0	2	18	0.773882	0.930272	0.0313901
REACTOME_CROSSLINKING_OF_COLLAGEN_FIBRILS	0	2	18	0.773882	0.930272	0.0313901
REACTOME_PHOSPHOLIPASE_C_MEDIATED_CASCADE_FGFR2	0	2	18	0.773882	0.930272	0.0313901
REACTOME_SHC_MEDIATED_CASCADE:FGFR3	0	2	18	0.773882	0.930272	0.0313901
REACTOME_PI_3K_CASCADE:FGFR3	0	2	18	0.773882	0.930272	0.0313901
REACTOME_CELL_SURFACE_INTERACTIONS_AT_THE_VASCULAR_WALL	12	16	194	0.774705	0.930515	0.0312764	FYN:CD44:SLC7A5:TNFRSF10A:CD2:TNFRSF10B:ATP1B1:SLC7A11:SLC16A1:JAM3:SLC3A2:YES1
REACTOME_SUMOYLATION_OF_SUMOYLATION_PROTEINS	1	3	35	0.777222	0.932791	0.0302157	RANBP2
REACTOME_FACTORS_INVOLVED_IN_MEGAKARYOCYTE_DEVELOPMENT_AND_PLATELET_PRODUCTION	10	14	167	0.780294	0.935729	0.0288499	KIF9:SH2B3:MYB:AKAP1:IRF1:DOCK10:MAFF:HDAC2:MAFG:MAFK
REACTOME_RHO_GTPASE_CYCLE	8	12	139	0.781651	0.935859	0.0287896	TRIO:ARAP2:RHOU:ARHGEF2:RHOB:TIAM1:ARHGEF3:TAGAP
REACTOME_CARDIAC_CONDUCTION	8	12	139	0.781651	0.935859	0.0287896	KCNK15:ATP1B1:CAMK2D:ITPR1:ATP1A1:KCNK5:KCNJ14:PLN
REACTOME_MITOCHONDRIAL_TRANSLATION	5	8	96	0.782307	0.935896	0.0287723	MRPL32:MTRF1L:MRPS25:PTCD3:MRPS17
REACTOME_PKA_MEDIATED_PHOSPHORYLATION_OF_CREB	0	2	19	0.791823	0.937554	0.0280037
REACTOME_PROSTACYCLIN_SIGNALLING_THROUGH_PROSTACYCLIN_RECEPTOR	0	2	19	0.791823	0.937554	0.0280037
REACTOME_ROS_AND_RNS_PRODUCTION_IN_PHAGOCYTES	1	3	36	0.790508	0.937554	0.0280037	ATP6V0A2
REACTOME_NUCLEAR_PORE_COMPLEX_NPC_DISASSEMBLY	1	3	36	0.790508	0.937554	0.0280037	RANBP2
REACTOME_AFLATOXIN_ACTIVATION_AND_DETOXIFICATION	0	2	19	0.791823	0.937554	0.0280037
REACTOME_ANCHORING_OF_THE_BASAL_BODY_TO_THE_PLASMA_MEMBRANE	5	8	97	0.790591	0.937554	0.0280037	RPGRIP1L:TCTN3:NPHP4:AHI1:CSNK1E
REACTOME_HDR_THROUGH_HOMOLOGOUS_RECOMBINATION_HRR	3	6	67	0.788038	0.937554	0.0280037	POLE4:UBC:WRN
REACTOME_REGULATION_OF_TLR_BY_ENDOGENOUS_LIGAND	0	2	19	0.791823	0.937554	0.0280037
REACTOME_COPI_INDEPENDENT_GOLGI_TO_ER_RETROGRADE_TRAFFIC	2	5	52	0.791476	0.937554	0.0280037	GALNT1:BICD2
REACTOME_PLASMA_LIPOPROTEIN_ASSEMBLY	0	2	19	0.791823	0.937554	0.0280037
REACTOME_LDL_CLEARANCE	0	2	19	0.791823	0.937554	0.0280037
REACTOME_METABOLISM_OF_COFACTORS	0	2	19	0.791823	0.937554	0.0280037
REACTOME_BIOSYNTHESIS_OF_SPECIALIZED_PRORESOLVING_MEDIATORS_SPMS	0	2	19	0.791823	0.937554	0.0280037
REACTOME_DNA_REPLICATION	7	11	127	0.797852	0.943201	0.0253955	PSME4:UBE2D1:PSMA6:PSMA2:SKP1:POLE4:UBC
REACTOME_DISEASES_ASSOCIATED_WITH_O_GLYCOSYLATION_OF_PROTEINS	3	6	68	0.797638	0.943201	0.0253955	POMT2:NOTCH2:C1GALT1C1
REACTOME_ORGANELLE_BIOGENESIS_AND_MAINTENANCE	19	24	295	0.798876	0.943668	0.0251809	RPGRIP1L:GABPB1:TTC26:TFAM:PRKAB1:SOD2:EXOC2:TCTN3:NR1D1:NPHP4:AHI1:TGS1:PPRC1:ASAP1:CHCHD6:TFB2M:ARF4:CYCS:CSNK1E
REACTOME_SIGNALLING_TO_RAS	0	2	20	0.808343	0.945169	0.0244907
REACTOME_MITOCHONDRIAL_FATTY_ACID_BETA_OXIDATION	1	3	37	0.803091	0.945169	0.0244907	MMAA
REACTOME_METABOLISM_OF_NUCLEOTIDES	5	8	99	0.806434	0.945169	0.0244907	DHODH:NT5E:ENTPD7:UCKL1:TXNRD1
REACTOME_LAGGING_STRAND_SYNTHESIS	0	2	20	0.808343	0.945169	0.0244907
REACTOME_GAP_JUNCTION_ASSEMBLY	1	3	37	0.803091	0.945169	0.0244907	GJC1
REACTOME_INTERACTIONS_OF_REV_WITH_HOST_CELLULAR_PROTEINS	1	3	37	0.803091	0.945169	0.0244907	RANBP2
REACTOME_FGFR2_LIGAND_BINDING_AND_ACTIVATION	0	2	20	0.808343	0.945169	0.0244907
REACTOME_TRANSPORT_OF_CONNEXONS_TO_THE_PLASMA_MEMBRANE	0	2	20	0.808343	0.945169	0.0244907
REACTOME_NUCLEAR_ENVELOPE_BREAKDOWN	2	5	53	0.802125	0.945169	0.0244907	RANBP2:LMNA
REACTOME_FRS_MEDIATED_FGFR3_SIGNALING	0	2	20	0.808343	0.945169	0.0244907
REACTOME_SHC_MEDIATED_CASCADE:FGFR4	0	2	20	0.808343	0.945169	0.0244907
REACTOME_PI_3K_CASCADE:FGFR4	0	2	20	0.808343	0.945169	0.0244907
REACTOME_G_BETA:GAMMA_SIGNALLING_THROUGH_CDC42	0	2	20	0.808343	0.945169	0.0244907
REACTOME_MOLECULES_ASSOCIATED_WITH_ELASTIC_FIBRES	1	4	38	0.814997	0.950724	0.0219455	LTBP4
REACTOME_MITOTIC_METAPHASE_AND_ANAPHASE	12	16	201	0.814994	0.950724	0.0219455	PSME4:UBE2D1:PSMA6:PPP2CB:PSMA2:UBC:RANBP2:AHCTF1:LMNA:MIS12:ANKLE2:PPP2R2A
REACTOME_SLC_TRANSPORTER_DISORDERS	5	8	100	0.813998	0.950724	0.0219455	SLC35A2:GCK:RANBP2:SLC16A1:SLC3A2
REACTOME_SIGNAL_TRANSDUCTION_BY_L1	0	2	21	0.823553	0.953286	0.0207766
REACTOME_CELLULAR_HEXOSE_TRANSPORT	0	2	21	0.823553	0.953286	0.0207766
REACTOME_BETA_CATENIN_INDEPENDENT_WNT_SIGNALING	8	12	145	0.821153	0.953286	0.0207766	PSME4:PSMA6:PSMA2:DVL1:AGO2:MYC:UBC:ITPR1
REACTOME_PRESYNAPTIC_FUNCTION_OF_KAINATE_RECEPTORS	0	2	21	0.823553	0.953286	0.0207766
REACTOME_RHO_GTPASES_ACTIVATE_PAKS	0	2	21	0.823553	0.953286	0.0207766
REACTOME_SHC_MEDIATED_CASCADE:FGFR1	0	2	21	0.823553	0.953286	0.0207766
REACTOME_PI_3K_CASCADE:FGFR1	0	2	21	0.823553	0.953286	0.0207766
REACTOME_COMPLEX_I_BIOGENESIS	2	5	55	0.822054	0.953286	0.0207766	NDUFAF4:NDUFAF2
REACTOME_SYNAPTIC_ADHESION_LIKE_MOLECULES	0	2	21	0.823553	0.953286	0.0207766
REACTOME_BLOOD_GROUP_SYSTEMS_BIOSYNTHESIS	0	2	21	0.823553	0.953286	0.0207766
REACTOME_GABA_B_RECEPTOR_ACTIVATION	1	4	39	0.826255	0.95494	0.0200241	GNAI1
REACTOME_PLATELET_AGGREGATION_PLUG_FORMATION	1	4	39	0.826255	0.95494	0.0200241	APBB1IP
REACTOME_TCF_DEPENDENT_SIGNALING_IN_RESPONSE_TO_WNT	14	19	232	0.829221	0.957629	0.0188029	CUL3:PSME4:PSMA6:PPP2CB:PSMA2:DVL1:CSNK1A1:BCL9:SMARCA4:MYC:TLE3:UBC:ZNRF3:CSNK1E
REACTOME_GABA_RECEPTOR_ACTIVATION	2	5	56	0.831361	0.959361	0.0180181	GNAI1:NPTN
REACTOME_ESR_MEDIATED_SIGNALING	13	18	219	0.834545	0.96224	0.0167164	CCND1:MYB:AGO2:FOSB:GNAI1:CCNT1:MYC:TLE3:CHD1:FOS:BCL2:NRIP1:KPNA2
REACTOME_SIGNALING_BY_RECEPTOR_TYROSINE_KINASES	31	38	468	0.83514	0.96224	0.0167164	FYN:CTNNA1:TAB2:NEDD4:FLT1:PPP2CB:SH2B3:VEGFA:NCBP2:DUSP4:ATF1:GGA3:STAT5A:FGFRL1:HNRNPA1:DUSP6:FURIN:UBC:ITPR1:ADAM17:TIAM1:PRKCD:SPRY1:CUL5:IGF2:PTPN2:YES1:SOCS1:ATP6V0A2:PRR5:PDGFA
REACTOME_RA_BIOSYNTHESIS_PATHWAY	0	2	22	0.837557	0.963544	0.0161283
REACTOME_FRS_MEDIATED_FGFR4_SIGNALING	0	2	22	0.837557	0.963544	0.0161283
REACTOME_TERMINATION_OF_O_GLYCAN_BIOSYNTHESIS	0	2	23	0.850451	0.969575	0.0134188
REACTOME_POST_CHAPERONIN_TUBULIN_FOLDING_PATHWAY	0	2	23	0.850451	0.969575	0.0134188
REACTOME_THROMBOXANE_SIGNALLING_THROUGH_TP_RECEPTOR	0	2	23	0.850451	0.969575	0.0134188
REACTOME_FORMATION_OF_THE_BETA_CATENIN:TCF_TRANSACTIVATING_COMPLEX	4	8	90	0.850561	0.969575	0.0134188	BCL9:SMARCA4:MYC:TLE3
REACTOME_THE_CANONICAL_RETINOID_CYCLE_IN_RODS_TWILIGHT_VISION	0	2	23	0.850451	0.969575	0.0134188
REACTOME_PEPTIDE_HORMONE_METABOLISM	4	8	90	0.850561	0.969575	0.0134188	RAB27A:STX1A:EXOC2:SEC11C
REACTOME_CLASS_A_1_RHODOPSIN_LIKE_RECEPTORS	20	26	321	0.85017	0.969575	0.0134188	HRH2:CCL20:ECE1:CXCL9:APP:XCL1:XCL2:ECE2:CXCL3:CXCL10:CXCL11:GPR183:ADORA2B:PTGER4:RRH:CCR4:NPW:HCAR1:P2RY11:S1PR2
REACTOME_BBSOME_MEDIATED_CARGO_TARGETING_TO_CILIUM	0	2	23	0.850451	0.969575	0.0134188
REACTOME_FRS_MEDIATED_FGFR1_SIGNALING	0	2	23	0.850451	0.969575	0.0134188
REACTOME_PI_3K_CASCADE:FGFR2	0	2	23	0.850451	0.969575	0.0134188
REACTOME_SHC_MEDIATED_CASCADE:FGFR2	0	2	23	0.850451	0.969575	0.0134188
REACTOME_DIGESTION	0	2	23	0.850451	0.969575	0.0134188
REACTOME_AMINE_LIGAND_BINDING_RECEPTORS	1	4	42	0.856419	0.971523	0.0125468	HRH2
REACTOME_CONSTITUTIVE_SIGNALING_BY_ABERRANT_PI3K_IN_CANCER	3	6	75	0.855348	0.971523	0.0125468	FYN:ICOS:PDGFA
REACTOME_NON_INTEGRIN_MEMBRANE_ECM_INTERACTIONS	2	5	59	0.856807	0.971523	0.0125468	AGRN:PDGFA
REACTOME_DNA_DOUBLE_STRAND_BREAK_REPAIR	9	14	166	0.856493	0.971523	0.0125468	LIG3:ERCC1:UIMC1:POLE4:UBC:PPP4R2:WRN:LIG4:KPNA2
REACTOME_HOMOLOGOUS_DNA_PAIRING_AND_STRAND_EXCHANGE	1	4	42	0.856419	0.971523	0.0125468	WRN
REACTOME_COOPERATION_OF_PDCL_PHLP1_AND_TRIC_CCT_IN_G_PROTEIN_BETA_FOLDING	1	4	42	0.856419	0.971523	0.0125468	GNAI1
REACTOME_CARBOXYTERMINAL_POST_TRANSLATIONAL_MODIFICATIONS_OF_TUBULIN	1	4	42	0.856419	0.971523	0.0125468	TTLL4
REACTOME_CELL_JUNCTION_ORGANIZATION	4	8	92	0.863502	0.977635	0.00982315	CTNNA1:TESK1:VASP:CLDN1
REACTOME_EPH_EPHRIN_SIGNALING	4	8	92	0.863502	0.977635	0.00982315	FYN:SDCBP:TIAM1:YES1
REACTOME_HOMOLOGY_DIRECTED_REPAIR	7	11	138	0.864553	0.978086	0.00962283	LIG3:ERCC1:UIMC1:POLE4:UBC:PPP4R2:WRN
REACTOME_SIGNALING_BY_FGFR2_IN_DISEASE	1	4	43	0.865359	0.978261	0.00954544	NCBP2
REACTOME_TRANSMISSION_ACROSS_CHEMICAL_SYNAPSES	16	22	269	0.866067	0.978323	0.00951768	CAMKK1:STX1A:CAMKK2:SLC38A1:PRKAB1:GLS:GNAI1:PPFIA1:MDM2:GLUL:CAMK2D:CHRNA6:LIN7C:GRIP1:NPTN:KPNA2
REACTOME_TRANSPORT_OF_VITAMINS_NUCLEOSIDES_AND_RELATED_MOLECULES	1	4	44	0.873786	0.97966	0.00892449	SLC35A2
REACTOME_VIRAL_MESSENGER_RNA_SYNTHESIS	1	4	44	0.873786	0.97966	0.00892449	RANBP2
REACTOME_GLUCURONIDATION	0	2	25	0.873253	0.97966	0.00892449
REACTOME_G_PROTEIN_GATED_POTASSIUM_CHANNELS	0	2	25	0.873253	0.97966	0.00892449
REACTOME_G_BETA:GAMMA_SIGNALLING_THROUGH_PI3KGAMMA	0	2	25	0.873253	0.97966	0.00892449
REACTOME_ADP_SIGNALLING_THROUGH_P2Y_PURINOCEPTOR_1	0	2	25	0.873253	0.97966	0.00892449
REACTOME_PHASE_0_RAPID_DEPOLARISATION	1	4	44	0.873786	0.97966	0.00892449	CAMK2D
REACTOME_FRS_MEDIATED_FGFR2_SIGNALING	0	2	25	0.873253	0.97966	0.00892449
REACTOME_DOWNSTREAM_SIGNALING_OF_ACTIVATED_FGFR3	0	2	25	0.873253	0.97966	0.00892449
REACTOME_DNA_DOUBLE_STRAND_BREAK_RESPONSE	3	7	77	0.869024	0.97966	0.00892449	UIMC1:UBC:KPNA2
REACTOME_HATS_ACETYLATE_HISTONES	7	12	140	0.874523	0.979753	0.00888345	ELP3:CLOCK:KANSL2:OGT:BRPF1:EP400:TAF9
REACTOME_NEGATIVE_REGULATION_OF_THE_PI3K_AKT_NETWORK	5	9	110	0.877397	0.981506	0.00810715	FYN:PPP2CB:IER3:ICOS:PDGFA
REACTOME_MITOTIC_SPINDLE_CHECKPOINT	5	9	110	0.877397	0.981506	0.00810715	UBE2D1:PPP2CB:RANBP2:AHCTF1:MIS12
REACTOME_TRANSPORT_OF_SMALL_MOLECULES	49	58	728	0.878551	0.982065	0.00785998	CLCN6:WNK1:SLC12A2:PSME4:SEL1L:DERL2:TRPM7:DERL3:PSMA6:SLC35A2:MAGT1:ABCC1:SLC7A5:SLC39A14:PSMA2:SLC38A1:SKP1:ABCB6:SGK1:AKAP1:ABCC4:SLC41A2:IREB2:YME1L1:SLC7A1:FURIN:SLC39A6:SLC39A3:ATP1B1:SLC20A1:CAMK2D:UBC:SLC7A11:SLC16A1:NIPAL1:ATP1A1:SLC9B2:WNK2:FTH1:SLC3A2:CLCN5:LRRC8C:LRRC8D:NIPAL4:LPL:ATP6V0A2:SLC6A9:LRRC8B:PLN
REACTOME_IMMUNOREGULATORY_INTERACTIONS_BETWEEN_A_LYMPHOID_AND_A_NON_LYMPHOID_CELL	10	15	186	0.880329	0.983319	0.00730573	CLEC2D:CD200:CD40LG:CD81:ULBP1:CD226:B2M:NCR3LG1:TRAV8-4:TRAV19
REACTOME_FORMATION_OF_TUBULIN_FOLDING_INTERMEDIATES_BY_CCT_TRIC	0	3	26	0.883316	0.983723	0.0071271
REACTOME_FERTILIZATION	0	3	26	0.883316	0.983723	0.0071271
REACTOME_WNT_LIGAND_BIOGENESIS_AND_TRAFFICKING	0	3	26	0.883316	0.983723	0.0071271
REACTOME_SIGNALING_BY_MET	3	7	79	0.881573	0.983723	0.0071271	GGA3:UBC:PTPN2
REACTOME_G_ALPHA_I_SIGNALLING_EVENTS	25	32	403	0.888946	0.989178	0.00472565	CAMKK1:RGS1:PPP2CB:CAMKK2:CCL20:GNAI1:CXCL9:APP:RGS16:CAMK2D:ITPR1:GPSM1:CXCL3:PRKCD:CXCL10:CXCL11:GPR183:LPL:RRH:KPNA2:CCR4:NPW:AGRN:HCAR1:S1PR2
REACTOME_NEUROTRANSMITTER_RECEPTORS_AND_POSTSYNAPTIC_SIGNAL_TRANSMISSION	11	17	204	0.892834	0.989178	0.00472565	CAMKK1:CAMKK2:PRKAB1:GNAI1:MDM2:CAMK2D:CHRNA6:LIN7C:GRIP1:NPTN:KPNA2
REACTOME_COLLAGEN_DEGRADATION	2	6	64	0.891788	0.989178	0.00472565	FURIN:ADAM17
REACTOME_SYNDECAN_INTERACTIONS	0	3	27	0.892582	0.989178	0.00472565
REACTOME_PHASE_2_PLATEAU_PHASE	0	3	27	0.892582	0.989178	0.00472565
REACTOME_DOWNSTREAM_SIGNALING_OF_ACTIVATED_FGFR4	0	3	27	0.892582	0.989178	0.00472565
REACTOME_SIGNALING_BY_NUCLEAR_RECEPTORS	15	21	262	0.891648	0.989178	0.00472565	CCND1:MYB:AGO2:FOSB:GNAI1:CCNT1:RARA:MYC:TLE3:CHD1:FABP5:FOS:BCL2:NRIP1:KPNA2
REACTOME_BINDING_AND_UPTAKE_OF_LIGANDS_BY_SCAVENGER_RECEPTORS	4	8	98	0.896794	0.991411	0.00374636	APOL1:HYOU1:HSP90B1:FTH1
REACTOME_PROCESSING_OF_DNA_DOUBLE_STRAND_BREAK_ENDS	4	8	98	0.896794	0.991411	0.00374636	UIMC1:UBC:PPP4R2:WRN
REACTOME_CLATHRIN_MEDIATED_ENDOCYTOSIS	7	12	145	0.896833	0.991411	0.00374636	SYNJ2:ARFGAP1:SNX9:UBQLN1:TOR1B:UBC:FNBP1
REACTOME_CELL_CELL_JUNCTION_ORGANIZATION	2	6	65	0.897789	0.991736	0.00360373	CTNNA1:CLDN1
REACTOME_BIOLOGICAL_OXIDATIONS	12	18	221	0.900607	0.99229	0.0033615	GCLC:GCLM:IMPAD1:AHR:CYP27B1:PODXL2:MTRR:TPST2:CHAC1:AOC2:FDX1:MAT2A
REACTOME_PREFOLDIN_MEDIATED_TRANSFER_OF_SUBSTRATE_TO_CCT_TRIC	0	3	28	0.901112	0.99229	0.0033615
REACTOME_SLC_MEDIATED_TRANSMEMBRANE_TRANSPORT	14	20	250	0.899638	0.99229	0.0033615	SLC12A2:SLC35A2:SLC7A5:SLC39A14:SLC38A1:SLC41A2:SLC7A1:SLC39A6:SLC39A3:SLC20A1:SLC7A11:SLC16A1:SLC3A2:SLC6A9
REACTOME_RESPIRATORY_ELECTRON_TRANSPORT	4	8	99	0.9016	0.99229	0.0033615	COQ10B:NDUFAF4:NDUFAF2:CYCS
REACTOME_DIGESTION_AND_ABSORPTION	0	3	28	0.901112	0.99229	0.0033615
REACTOME_SIRT1_NEGATIVELY_REGULATES_RRNA_EXPRESSION	2	6	66	0.90349	0.99364	0.00277088	RRP8:TAF1D
REACTOME_PI_METABOLISM	3	7	84	0.908467	0.998381	0.000703543	MTMR1:SYNJ2:RUFY1
REACTOME_BASE_EXCISION_REPAIR	3	8	91	0.936991	1	1.15719e-15	LIG3:POLE4:TDG
REACTOME_SIGNALING_BY_RHO_GTPASES	15	36	450	0.999964	1	1.15719e-15	TRIO:CTNNA1:ARAP2:PPP2CB:DVL1:RHOU:ARHGEF2:RHOB:RANBP2:AHCTF1:TIAM1:PRKCD:ARHGEF3:TAGAP:MIS12
REACTOME_SIGNALING_BY_WNT	17	26	327	0.965282	1	1.15719e-15	CUL3:PSME4:PSMA6:PPP2CB:PSMA2:DVL1:SKP1:CSNK1A1:BCL9:AGO2:SMARCA4:MYC:TLE3:UBC:ITPR1:ZNRF3:CSNK1E
REACTOME_DEVELOPMENTAL_BIOLOGY	59	88	1104	0.99971	1	1.15719e-15	FARP2:SPAG9:FYN:MAMLD1:TRIO:CTNNA1:PSME4:PSMA6:GSPT1:RPL18A:STX1A:PSMA2:GCK:NFKB1:NCBP2:PLXNA1:FOXP1:MYB:ETF1:RPL21:EGR2:RPS10:CDKN1A:VASP:RARA:ACVR1B:MED4:MYC:TGS1:SDCBP:SEMA7A:FURIN:MED9:RHOB:RPL7:NR6A1:UBC:DPYSL4:TIAM1:MED19:PKNOX1:RPL26:GFI1:RPL9:RPL36AL:RBPJ:ALCAM:PRNP:RELA:LPL:YES1:SIAH2:AGRN:RPS26:RPL41:TNF:RPL36A:RBM8A:RPL17
REACTOME_CELL_CELL_COMMUNICATION	5	11	130	0.95117	1	1.15719e-15	FYN:CTNNA1:TESK1:VASP:CLDN1
REACTOME_MEIOSIS	3	10	117	0.98584	1	1.15719e-15	MLH3:HSPA2:LMNA
REACTOME_CELL_CYCLE	28	51	642	0.999849	1	1.15719e-15	PSME4:UBE2D1:UIMC1:PSMA6:PPP2CB:CDK6:PSMA2:CCND1:SKP1:POLE4:GORASP2:MLH3:CDKN1A:HSPA2:E2F5:MDM2:MYC:PHLDA1:UBC:RANBP2:AHCTF1:LMNA:WRN:MIS12:E2F6:ANKLE2:CSNK1E:PPP2R2A
REACTOME_DEFENSINS	0	5	52	0.986459	1	1.15719e-15
REACTOME_BETA_DEFENSINS	0	4	42	0.968977	1	1.15719e-15
REACTOME_DEGRADATION_OF_THE_EXTRACELLULAR_MATRIX	4	12	140	0.988773	1	1.15719e-15	CD44:CAPN15:FURIN:ADAM17
REACTOME_EXTRACELLULAR_MATRIX_ORGANIZATION	11	24	301	0.998188	1	1.15719e-15	CD44:LTBP4:CAPN15:P4HA1:ADAM19:FURIN:APP:ADAM17:JAM3:AGRN:PDGFA
REACTOME_INSULIN_RECEPTOR_SIGNALLING_CASCADE	0	5	54	0.988529	1	1.15719e-15
REACTOME_SIGNALLING_TO_ERKS	0	3	32	0.928982	1	1.15719e-15
REACTOME_COLLAGEN_FORMATION	1	8	90	0.994925	1	1.15719e-15	P4HA1
REACTOME_PHOSPHOLIPID_METABOLISM	11	17	211	0.915794	1	1.15719e-15	DGAT2:MTMR1:SYNJ2:PLA2G12A:ETNK1:GPD1L:AGPAT5:MFSD2A:PTDSS2:RUFY1:PLD6
REACTOME_MHC_CLASS_II_ANTIGEN_PRESENTATION	2	10	124	0.997647	1	1.15719e-15	SEC24A:SEC31A
REACTOME_INTEGRIN_CELL_SURFACE_INTERACTIONS	3	7	85	0.913146	1	1.15719e-15	CD44:JAM3:AGRN
REACTOME_NEURONAL_SYSTEM	24	33	411	0.937714	1	1.15719e-15	CAMKK1:EPB41L2:KCNH4:STX1A:PANX1:CAMKK2:SLC38A1:PRKAB1:GLS:GNAI1:PPFIA1:MDM2:GLUL:CAMK2D:CHRNA6:LIN7C:HOMER1:GRIP1:NPTN:KCNG3:KCNJ14:KPNA2:GJC1:SIPA1L1
REACTOME_SIGNALING_BY_GPCR	40	93	1174	1	1	1.15719e-15	CAMKK1:TRIO:RGS1:PPP2CB:CAMKK2:GLP1R:HRH2:CCL20:ARHGEF2:ECE1:GNAI1:ADM2:CXCL9:APP:XCL1:XCL2:RGS16:RHOB:ECE2:CAMK2D:ITPR1:TIAM1:GPSM1:CXCL3:PRKCD:ARHGEF3:CXCL10:CXCL11:GPR183:ADORA2B:PTGER4:LPL:RRH:KPNA2:CCR4:NPW:AGRN:HCAR1:P2RY11:S1PR2
REACTOME_CELL_CYCLE_MITOTIC	23	43	536	0.999582	1	1.15719e-15	PSME4:UBE2D1:PSMA6:PPP2CB:CDK6:PSMA2:CCND1:SKP1:POLE4:GORASP2:CDKN1A:E2F5:MYC:PHLDA1:UBC:RANBP2:AHCTF1:LMNA:MIS12:E2F6:ANKLE2:CSNK1E:PPP2R2A
REACTOME_CELL_CYCLE_CHECKPOINTS	13	24	291	0.987074	1	1.15719e-15	PSME4:UBE2D1:UIMC1:PSMA6:PPP2CB:PSMA2:CDKN1A:MDM2:UBC:RANBP2:AHCTF1:WRN:MIS12
REACTOME_OLFACTORY_SIGNALING_PATHWAY	0	32	399	1	1	1.15719e-15
REACTOME_RECRUITMENT_OF_NUMA_TO_MITOTIC_CENTROSOMES	1	8	94	0.996218	1	1.15719e-15	CSNK1E
REACTOME_GLUCAGON_SIGNALING_IN_METABOLIC_REGULATION	0	3	33	0.934624	1	1.15719e-15
REACTOME_PROTEIN_FOLDING	3	9	102	0.965872	1	1.15719e-15	XRN2:FBXW7:GNAI1
REACTOME_STRIATED_MUSCLE_CONTRACTION	0	3	36	0.949004	1	1.15719e-15
REACTOME_MUSCLE_CONTRACTION	8	17	207	0.986176	1	1.15719e-15	KCNK15:ATP1B1:CAMK2D:ITPR1:ATP1A1:KCNK5:KCNJ14:PLN
REACTOME_AXON_GUIDANCE	34	44	554	0.938955	1	1.15719e-15	FARP2:FYN:TRIO:PSME4:PSMA6:GSPT1:RPL18A:PSMA2:NCBP2:PLXNA1:ETF1:RPL21:RPS10:VASP:SDCBP:SEMA7A:RHOB:RPL7:UBC:DPYSL4:TIAM1:RPL26:RPL9:RPL36AL:ALCAM:PRNP:YES1:SIAH2:AGRN:RPS26:RPL41:RPL36A:RBM8A:RPL17
REACTOME_G_ALPHA_Q_SIGNALLING_EVENTS	9	18	217	0.981149	1	1.15719e-15	TRIO:RGS1:APP:XCL1:XCL2:RGS16:ITPR1:PRKCD:P2RY11
REACTOME_CLASS_C_3_METABOTROPIC_GLUTAMATE_PHEROMONE_RECEPTORS	0	4	39	0.960223	1	1.15719e-15
REACTOME_CLASS_B_2_SECRETIN_FAMILY_RECEPTORS	2	8	94	0.98263	1	1.15719e-15	GLP1R:ADM2
REACTOME_G_ALPHA_S_SIGNALLING_EVENTS	7	43	541	1	1	1.15719e-15	GLP1R:HRH2:GNAI1:ADM2:ADORA2B:PTGER4:P2RY11
REACTOME_SMOOTH_MUSCLE_CONTRACTION	0	4	38	0.956788	1	1.15719e-15
REACTOME_ACTIVATION_OF_KAINATE_RECEPTORS_UPON_GLUTAMATE_BINDING	0	3	30	0.916196	1	1.15719e-15
REACTOME_GPCR_LIGAND_BINDING	22	36	454	0.994177	1	1.15719e-15	GLP1R:HRH2:CCL20:ECE1:ADM2:CXCL9:APP:XCL1:XCL2:ECE2:CXCL3:CXCL10:CXCL11:GPR183:ADORA2B:PTGER4:RRH:CCR4:NPW:HCAR1:P2RY11:S1PR2
REACTOME_THROMBIN_SIGNALLING_THROUGH_PROTEINASE_ACTIVATED_RECEPTORS_PARS	0	3	32	0.928982	1	1.15719e-15
REACTOME_MITOTIC_G2_G2_M_PHASES	10	16	199	0.924683	1	1.15719e-15	PSME4:PSMA6:PPP2CB:PSMA2:SKP1:CDKN1A:PHLDA1:UBC:CSNK1E:PPP2R2A
REACTOME_DNA_REPAIR	16	27	331	0.982637	1	1.15719e-15	LIG3:ERCC1:UIMC1:ACTR5:ELL:POLE4:INO80:CHD1L:TDG:CUL4A:UBC:PPP4R2:WRN:LIG4:KPNA2:USP7
REACTOME_CHROMOSOME_MAINTENANCE	1	9	109	0.998761	1	1.15719e-15	POLE4
REACTOME_L1CAM_INTERACTIONS	2	10	120	0.996907	1	1.15719e-15	SDCBP:ALCAM
REACTOME_INTERACTION_BETWEEN_L1_AND_ANKYRINS	0	3	31	0.922853	1	1.15719e-15
REACTOME_RECYCLING_PATHWAY_OF_L1	0	4	48	0.981133	1	1.15719e-15
REACTOME_PLATELET_HOMEOSTASIS	3	7	86	0.91761	1	1.15719e-15	P2RX7:PPP2CB:ITPR1
REACTOME_AQUAPORIN_MEDIATED_TRANSPORT	0	5	52	0.986459	1	1.15719e-15
REACTOME_KINESINS	1	5	60	0.956824	1	1.15719e-15	KIF9
REACTOME_MEIOTIC_RECOMBINATION	1	7	85	0.992688	1	1.15719e-15	MLH3
REACTOME_SIGNALING_BY_INSULIN_RECEPTOR	1	7	78	0.987868	1	1.15719e-15	ATP6V0A2
REACTOME_HEMOSTASIS	43	54	674	0.930547	1	1.15719e-15	FYN:CD44:HSPA5:APBB1IP:KIF9:P2RX7:SLC7A5:TNFRSF10A:PPP2CB:SH2B3:PHACTR2:VEGFA:CD2:MYB:TNFRSF10B:AKAP1:SRGN:ABCC4:IRF1:GNAI1:DOCK10:SERPINE2:APP:ATP1B1:RHOB:MANF:ITPR1:SLC7A11:SLC16A1:CD109:PRKCD:JAM3:IGF2:SLC3A2:YES1:CHID1:MAFF:HDAC2:FAM3C:MAFG:PDGFA:MAFK:F5
REACTOME_ACTIVATION_OF_ATR_IN_RESPONSE_TO_REPLICATION_STRESS	0	3	37	0.953057	1	1.15719e-15
REACTOME_INNATE_IMMUNE_SYSTEM	74	88	1104	0.938561	1	1.15719e-15	FYN:ERP44:BIRC3:CD44:TNFRSF1B:MAP2K3:TAB2:ATG5:POLR3E:MAP2K4:PSME4:RAB27A:UBE2D1:CD59:P2RX7:POLR3H:PSMA6:NFKBIA:VAPA:MAGT1:DNAJC3:PPP2CB:RELB:PSMA2:MAP3K8:LAMTOR3:NFKB1:UBE2D3:UNC93B1:PANX1:CD81:ITK:SKP1:ARMC8:IFIH1:QPCT:TNFAIP3:DUSP4:ATF1:LRRFIP1:TRAF3:IRAK2:TANK:SDCBP:DUSP6:SLC27A2:APP:STK11IP:DOK3:SURF4:UBC:ITPR1:EEF1A1:ATAD3B:NLRP3:PRKCD:FABP5:HSP90B1:B2M:FTH1:POLR3D:FOS:POLR1C:BCL2:RELA:HSPA…
REACTOME_MITOTIC_PROMETAPHASE	5	16	198	0.998832	1	1.15719e-15	PPP2CB:RANBP2:AHCTF1:MIS12:CSNK1E
REACTOME_COMPLEMENT_CASCADE	2	10	114	0.995354	1	1.15719e-15	CD59:CD81
REACTOME_MEIOTIC_SYNAPSIS	2	7	79	0.955437	1	1.15719e-15	HSPA2:LMNA
REACTOME_POTASSIUM_CHANNELS	3	8	99	0.959542	1	1.15719e-15	KCNH4:KCNG3:KCNJ14
REACTOME_TELOMERE_MAINTENANCE	1	7	82	0.990909	1	1.15719e-15	POLE4
REACTOME_CREATION_OF_C4_AND_C2_ACTIVATORS	0	6	71	0.997203	1	1.15719e-15
REACTOME_INITIAL_TRIGGERING_OF_COMPLEMENT	0	7	79	0.998562	1	1.15719e-15
REACTOME_G2_M_CHECKPOINTS	6	14	168	0.98267	1	1.15719e-15	PSME4:UIMC1:PSMA6:PSMA2:UBC:WRN
REACTOME_G2_M_DNA_DAMAGE_CHECKPOINT	2	8	95	0.983713	1	1.15719e-15	UIMC1:WRN
REACTOME_DNA_STRAND_ELONGATION	0	3	32	0.928982	1	1.15719e-15
REACTOME_IRS_MEDIATED_SIGNALLING	0	4	48	0.981133	1	1.15719e-15
REACTOME_THE_CITRIC_ACID_TCA_CYCLE_AND_RESPIRATORY_ELECTRON_TRANSPORT	7	14	173	0.96911	1	1.15719e-15	COQ10B:NDUFAF4:ME3:SLC16A1:NDUFAF2:CYCS:PDP2
REACTOME_TRANSLOCATION_OF_SLC2A4_GLUT4_TO_THE_PLASMA_MEMBRANE	2	6	71	0.927901	1	1.15719e-15	PRKAB1:EXOC2
REACTOME_REPRODUCTION	3	12	143	0.997192	1	1.15719e-15	MLH3:HSPA2:LMNA
REACTOME_GAP_JUNCTION_TRAFFICKING_AND_REGULATION	1	4	50	0.91492	1	1.15719e-15	GJC1
REACTOME_POST_TRANSLATIONAL_MODIFICATION:_SYNTHESIS_OF_GPI_ANCHORED_PROTEINS	3	8	94	0.946533	1	1.15719e-15	PIGT:CD109:PGAP1
REACTOME_RESPIRATORY_ELECTRON_TRANSPORT_ATP_SYNTHESIS_BY_CHEMIOSMOTIC_COUPLING_AND_HEAT_PRODUCTION_BY_UNCOUPLING_PROTEINS	4	10	122	0.969504	1	1.15719e-15	COQ10B:NDUFAF4:NDUFAF2:CYCS
REACTOME_COLLAGEN_BIOSYNTHESIS_AND_MODIFYING_ENZYMES	1	6	67	0.973477	1	1.15719e-15	P4HA1
REACTOME_PLASMA_LIPOPROTEIN_ASSEMBLY_REMODELING_AND_CLEARANCE	2	6	71	0.927901	1	1.15719e-15	FURIN:LPL
REACTOME_RHO_GTPASE_EFFECTORS	8	26	321	0.999973	1	1.15719e-15	CTNNA1:PPP2CB:DVL1:RHOB:RANBP2:AHCTF1:PRKCD:MIS12
REACTOME_ASSEMBLY_OF_COLLAGEN_FIBRILS_AND_OTHER_MULTIMERIC_STRUCTURES	0	5	61	0.993583	1	1.15719e-15
REACTOME_FCGAMMA_RECEPTOR_FCGR_DEPENDENT_PHAGOCYTOSIS	4	12	143	0.990551	1	1.15719e-15	FYN:ITPR1:PRKCD:YES1
REACTOME_FCGR_ACTIVATION	2	6	69	0.918908	1	1.15719e-15	FYN:YES1
REACTOME_REGULATION_OF_ACTIN_DYNAMICS_FOR_PHAGOCYTIC_CUP_FORMATION	0	10	118	0.999944	1	1.15719e-15
REACTOME_ROLE_OF_PHOSPHOLIPIDS_IN_PHAGOCYTOSIS	2	7	82	0.962947	1	1.15719e-15	ITPR1:PRKCD
REACTOME_GENE_SILENCING_BY_RNA	4	11	136	0.985907	1	1.15719e-15	AGO2:RANBP2:PLD6:PRKRA
REACTOME_PHASE_I_FUNCTIONALIZATION_OF_COMPOUNDS	4	9	105	0.926539	1	1.15719e-15	AHR:CYP27B1:AOC2:FDX1
REACTOME_PRC2_METHYLATES_HISTONES_AND_DNA	1	6	71	0.980001	1	1.15719e-15	JARID2
REACTOME_ARACHIDONIC_ACID_METABOLISM	1	5	59	0.953746	1	1.15719e-15	ABCC1
REACTOME_SCAVENGING_OF_HEME_FROM_PLASMA	1	6	69	0.976961	1	1.15719e-15	APOL1
REACTOME_VISUAL_PHOTOTRANSDUCTION	2	8	100	0.988228	1	1.15719e-15	LPL:AGRN
REACTOME_CONDENSATION_OF_PROPHASE_CHROMOSOMES	0	6	72	0.997426	1	1.15719e-15
REACTOME_SIGNALING_BY_TYPE_1_INSULIN_LIKE_GROWTH_FACTOR_1_RECEPTOR_IGF1R	1	5	54	0.934953	1	1.15719e-15	IGF2
REACTOME_RESOLUTION_OF_SISTER_CHROMATID_COHESION	4	10	125	0.974067	1	1.15719e-15	PPP2CB:RANBP2:AHCTF1:MIS12
REACTOME_THE_PHOTOTRANSDUCTION_CASCADE	0	3	34	0.939819	1	1.15719e-15
REACTOME_DNA_DAMAGE_TELOMERE_STRESS_INDUCED_SENESCENCE	2	7	80	0.958086	1	1.15719e-15	CDKN1A:EP400
REACTOME_REGULATION_OF_PLK1_ACTIVITY_AT_G2_M_TRANSITION	3	7	87	0.921868	1	1.15719e-15	SKP1:UBC:CSNK1E
REACTOME_ROLE_OF_LAT2_NTAL_LAB_ON_CALCIUM_MOBILIZATION	1	6	71	0.980001	1	1.15719e-15	FYN
REACTOME_FCERI_MEDIATED_MAPK_ACTIVATION	2	7	87	0.97288	1	1.15719e-15	MAP2K4:FOS
REACTOME_FCERI_MEDIATED_CAPLUS2_MOBILIZATION	2	7	86	0.971121	1	1.15719e-15	ITK:ITPR1
REACTOME_LAMININ_INTERACTIONS	0	3	30	0.916196	1	1.15719e-15
REACTOME_ECM_PROTEOGLYCANS	2	7	76	0.946521	1	1.15719e-15	APP:AGRN
REACTOME_HDACS_DEACETYLATE_HISTONES	2	8	92	0.980253	1	1.15719e-15	CHD4:HDAC2
REACTOME_RMTS_METHYLATE_HISTONE_ARGININES	2	7	77	0.949663	1	1.15719e-15	CCND1:SMARCA4
REACTOME_HSP90_CHAPERONE_CYCLE_FOR_STEROID_HORMONE_RECEPTORS_SHR	1	5	56	0.943208	1	1.15719e-15	HSPA2
REACTOME_CENTROSOME_MATURATION	1	7	81	0.990227	1	1.15719e-15	CSNK1E
REACTOME_GLYOXYLATE_METABOLISM_AND_GLYCINE_DEGRADATION	0	3	31	0.922853	1	1.15719e-15
REACTOME_COOPERATION_OF_PREFOLDIN_AND_TRIC_CCT_IN_ACTIN_AND_TUBULIN_FOLDING	0	3	33	0.934624	1	1.15719e-15
REACTOME_G_PROTEIN_BETA:GAMMA_SIGNALLING	0	3	32	0.928982	1	1.15719e-15
REACTOME_ERCC6_CSB_AND_EHMT2_G9A_POSITIVELY_REGULATE_RRNA_EXPRESSION	2	6	74	0.939684	1	1.15719e-15	CHD4:HDAC2
REACTOME_VASOPRESSIN_REGULATES_RENAL_WATER_HOMEOSTASIS_VIA_AQUAPORINS	0	4	43	0.971444	1	1.15719e-15
REACTOME_O_GLYCOSYLATION_OF_TSR_DOMAIN_CONTAINING_PROTEINS	0	4	39	0.960223	1	1.15719e-15
REACTOME_DNA_METHYLATION	0	5	63	0.994565	1	1.15719e-15
REACTOME_TRANSCRIPTIONAL_REGULATION_BY_SMALL_RNAS	2	9	105	0.991526	1	1.15719e-15	AGO2:RANBP2
REACTOME_CILIUM_ASSEMBLY	9	16	201	0.962336	1	1.15719e-15	RPGRIP1L:TTC26:EXOC2:TCTN3:NPHP4:AHI1:ASAP1:ARF4:CSNK1E
REACTOME_ACTIVATION_OF_HOX_GENES_DURING_DIFFERENTIATION	3	10	120	0.988186	1	1.15719e-15	EGR2:RARA:PKNOX1
REACTOME_INTRAFLAGELLAR_TRANSPORT	1	5	54	0.934953	1	1.15719e-15	TTC26
REACTOME_RHO_GTPASES_ACTIVATE_PKNS	1	8	92	0.995618	1	1.15719e-15	RHOB
REACTOME_ACTIVATED_PKN1_STIMULATES_TRANSCRIPTION_OF_AR_ANDROGEN_RECEPTOR_REGULATED_GENES_KLK2_AND_KLK3	0	6	65	0.995397	1	1.15719e-15
REACTOME_DOWNSTREAM_SIGNALING_OF_ACTIVATED_FGFR1	0	3	31	0.922853	1	1.15719e-15
REACTOME_DOWNSTREAM_SIGNALING_OF_ACTIVATED_FGFR2	0	3	30	0.916196	1	1.15719e-15
REACTOME_RHO_GTPASES_ACTIVATE_WASPS_AND_WAVES	0	3	36	0.949004	1	1.15719e-15
REACTOME_RHO_GTPASES_ACTIVATE_FORMINS	6	12	139	0.931272	1	1.15719e-15	PPP2CB:DVL1:RHOB:RANBP2:AHCTF1:MIS12
REACTOME_CD22_MEDIATED_BCR_REGULATION	0	5	61	0.993583	1	1.15719e-15
REACTOME_NONHOMOLOGOUS_END_JOINING_NHEJ	2	6	69	0.918908	1	1.15719e-15	UIMC1:LIG4
REACTOME_NEUTROPHIL_DEGRANULATION	27	38	478	0.968082	1	1.15719e-15	ERP44:CD44:TNFRSF1B:RAB27A:CD59:VAPA:MAGT1:DNAJC3:PSMA2:LAMTOR3:NFKB1:ARMC8:QPCT:SDCBP:SLC27A2:STK11IP:DOK3:SURF4:EEF1A1:ATAD3B:PRKCD:FABP5:B2M:FTH1:HSPA6:DDX3X:TXNDC5
REACTOME_ANTIMICROBIAL_PEPTIDES	0	8	97	0.999679	1	1.15719e-15
REACTOME_KERATINIZATION	1	18	216	1	1	1.15719e-15	FURIN
REACTOME_FORMATION_OF_THE_CORNIFIED_ENVELOPE	1	11	128	0.999706	1	1.15719e-15	FURIN
REACTOME_MITOTIC_PROPHASE	4	12	141	0.989398	1	1.15719e-15	PPP2CB:GORASP2:RANBP2:LMNA
REACTOME_M_PHASE	14	32	392	0.999724	1	1.15719e-15	PSME4:UBE2D1:PSMA6:PPP2CB:PSMA2:GORASP2:UBC:RANBP2:AHCTF1:LMNA:MIS12:ANKLE2:CSNK1E:PPP2R2A
REACTOME_DEPURINATION	0	5	56	0.990283	1	1.15719e-15
REACTOME_BASE_EXCISION_REPAIR_AP_SITE_FORMATION	1	5	63	0.964922	1	1.15719e-15	TDG
REACTOME_NUCLEOSOME_ASSEMBLY	0	6	73	0.997632	1	1.15719e-15
REACTOME_RET_SIGNALING	0	4	41	0.966297	1	1.15719e-15
REACTOME_AURKA_ACTIVATION_BY_TPX2	1	6	72	0.981371	1	1.15719e-15	CSNK1E
REACTOME_CARGO_RECOGNITION_FOR_CLATHRIN_MEDIATED_ENDOCYTOSIS	3	9	105	0.971271	1	1.15719e-15	UBQLN1:TOR1B:UBC
REACTOME_MET_ACTIVATES_PTK2_SIGNALING	0	3	30	0.916196	1	1.15719e-15
REACTOME_MET_PROMOTES_CELL_MOTILITY	0	4	41	0.966297	1	1.15719e-15
REACTOME_RUNX1_REGULATES_GENES_INVOLVED_IN_MEGAKARYOCYTE_DIFFERENTIATION_AND_PLATELET_FUNCTION	2	8	96	0.984731	1	1.15719e-15	SETD1A:NR4A3
REACTOME_RUNX1_REGULATES_TRANSCRIPTION_OF_GENES_INVOLVED_IN_DIFFERENTIATION_OF_HSCS	5	11	128	0.946213	1	1.15719e-15	PSME4:PSMA6:PSMA2:MYB:UBC
REACTOME_COLLAGEN_CHAIN_TRIMERIZATION	0	4	44	0.973715	1	1.15719e-15
REACTOME_PLASMA_LIPOPROTEIN_CLEARANCE	0	3	33	0.934624	1	1.15719e-15
REACTOME_FATTY_ACID_METABOLISM	6	15	177	0.989069	1	1.15719e-15	ACSL4:ABCC1:SLC27A2:MMAA:ACSL1:ACSL5
REACTOME_ANTIGEN_ACTIVATES_B_CELL_RECEPTOR_BCR_LEADING_TO_GENERATION_OF_SECOND_MESSENGERS	2	7	86	0.971121	1	1.15719e-15	FYN:ITPR1

## Sheet: Cluster 2
Pathway	observed	expected	pathway_size	p.val	p.adjust	Score	genes
REACTOME_COLLAGEN_CHAIN_TRIMERIZATION	21	3	44	5.77054e-16	8.65004e-13	12.063	COL11A1:COL17A1:COL5A3:COL4A4:COL16A1:COL9A3:COL20A1:COL1A1:COL12A1:COL9A1:COL7A1:COL5A1:COL2A1:COL6A3:COL1A2:COL22A1:COL24A1:COL4A1:COL4A5:COL6A6:COL28A1
REACTOME_NEURONAL_SYSTEM	67	25	411	9.53762e-15	5.43606e-12	11.2647	ABCC8:NRXN3:LRRC7:KCNH2:ABCC9:KCNQ2:ADCY2:RIMS1:HCN2:KCNK10:CHRNA4:NCALD:KCNA7:SLC1A6:APBA1:SLC1A2:SLC22A2:PRKAG3:GRIN3B:GRIA2:GRIA3:KCNC1:ADCY4:HCN4:NTRK3:CACNG8:KCNN3:SYT2:GRIP2:CACNA1B:DLG2:KCNJ1:PTPRD:KCNMA1:LRFN2:KCNJ6:GRIN2C:SHANK1:SHANK2:SLC1A7:PRKAA2:KCNJ9:LRRTM1:GRIK3:GRIK2:HCN1:ADCY1:SLITRK5:GABRB3:GNG4:KCNK9:NLGN1:DLGAP1:SYT9:ADCY5:SYT12:CHRNA9:GRIN1:ERBB4:SLITRK6:SYN3:GLRA4:DLGAP2:CAC…
REACTOME_ECM_PROTEOGLYCANS	26	5	76	1.08794e-14	5.43606e-12	11.2647	LAMA3:COL5A3:COL4A4:LAMB1:COL9A3:TGFB2:LAMA1:COMP:COL1A1:COL9A1:LAMA4:ITGB6:FN1:TNR:NCAN:COL5A1:LAMA5:LAMC1:COL2A1:HSPG2:NCAM1:COL6A3:COL1A2:COL4A1:COL4A5:COL6A6
REACTOME_EXTRACELLULAR_MATRIX_ORGANIZATION	53	19	301	2.26456e-13	8.11045e-11	10.091	LAMA3:LAMC2:COL11A1:COL17A1:FBLN1:COL5A3:COL4A4:COL16A1:ADAMTS2:NID2:LAMB1:COL9A3:TGFB2:TLL2:COL20A1:LAMA1:ICAM5:COMP:COL1A1:VWF:COL12A1:COL9A1:LAMA4:COL7A1:ITGB6:FN1:TNR:BMP4:KDR:NCAN:COL5A1:LAMA5:CAPN9:LAMC1:FBN2:COL2A1:ADAMTS18:FBN3:HSPG2:NCAM1:SCUBE1:COL6A3:ADAMTS9:COL1A2:KLK2:COL22A1:COL24A1:COL4A1:COL4A5:DMD:CAPN8:COL6A6:COL28A1
REACTOME_COLLAGEN_BIOSYNTHESIS_AND_MODIFYING_ENZYMES	23	5	67	2.70529e-13	8.11045e-11	10.091	COL11A1:COL17A1:COL5A3:COL4A4:COL16A1:ADAMTS2:COL9A3:TLL2:COL20A1:COL1A1:COL12A1:COL9A1:COL7A1:COL5A1:COL2A1:COL6A3:COL1A2:COL22A1:COL24A1:COL4A1:COL4A5:COL6A6:COL28A1
REACTOME_NCAM1_INTERACTIONS	18	3	42	5.85274e-13	1.25332e-10	9.90194	CACNA1G:COL5A3:COL4A4:COL9A3:COL9A1:NCAN:COL5A1:COL2A1:NCAM1:CACNA1C:GFRA1:CACNA1D:COL6A3:GFRA2:CNTN2:COL4A1:COL4A5:COL6A6
REACTOME_NCAM_SIGNALING_FOR_NEURITE_OUT_GROWTH	22	4	63	5.349e-13	1.25332e-10	9.90194	CACNA1G:SPTB:COL5A3:COL4A4:COL9A3:COL9A1:NCAN:COL5A1:SPTBN5:COL2A1:NCAM1:CACNA1C:GFRA1:CACNA1D:SPTBN4:COL6A3:SPTA1:GFRA2:CNTN2:COL4A1:COL4A5:COL6A6
REACTOME_DEGRADATION_OF_THE_EXTRACELLULAR_MATRIX	33	9	140	1.21227e-12	2.27149e-10	9.64369	LAMA3:LAMC2:COL11A1:COL17A1:COL5A3:COL4A4:COL16A1:LAMB1:COL9A3:TLL2:COL1A1:COL12A1:COL9A1:COL7A1:FN1:COL5A1:LAMA5:CAPN9:LAMC1:FBN2:COL2A1:ADAMTS18:FBN3:HSPG2:SCUBE1:COL6A3:ADAMTS9:COL1A2:KLK2:COL4A1:COL4A5:CAPN8:COL6A6
REACTOME_MET_ACTIVATES_PTK2_SIGNALING	15	2	30	1.58898e-12	2.64654e-10	9.57732	LAMA3:LAMC2:COL11A1:COL5A3:LAMB1:LAMA1:COL1A1:LAMA4:FN1:COL5A1:LAMA5:LAMC1:COL2A1:COL1A2:COL24A1
REACTOME_MET_PROMOTES_CELL_MOTILITY	17	3	41	4.53446e-12	6.79715e-10	9.16767	LAMA3:LAMC2:COL11A1:COL5A3:LAMB1:LAMA1:COL1A1:GAB1:LAMA4:FN1:COL5A1:LAMA5:LAMC1:TNS3:COL2A1:COL1A2:COL24A1
REACTOME_COLLAGEN_FORMATION	25	6	90	8.13208e-12	1.10818e-09	8.95539	LAMA3:LAMC2:COL11A1:COL17A1:COL5A3:COL4A4:COL16A1:ADAMTS2:COL9A3:TLL2:COL20A1:COL1A1:COL12A1:COL9A1:COL7A1:COL5A1:COL2A1:COL6A3:COL1A2:COL22A1:COL24A1:COL4A1:COL4A5:COL6A6:COL28A1
REACTOME_ASSEMBLY_OF_COLLAGEN_FIBRILS_AND_OTHER_MULTIMERIC_STRUCTURES	20	4	61	2.05249e-11	2.5639e-09	8.5911	LAMA3:LAMC2:COL11A1:COL17A1:COL5A3:COL4A4:COL9A3:TLL2:COL1A1:COL12A1:COL9A1:COL7A1:COL5A1:COL2A1:COL6A3:COL1A2:COL24A1:COL4A1:COL4A5:COL6A6
REACTOME_NON_INTEGRIN_MEMBRANE_ECM_INTERACTIONS	19	4	59	8.57033e-11	9.88225e-09	8.00514	LAMA3:LAMC2:COL11A1:COL5A3:COL4A4:LAMB1:LAMA1:COL1A1:LAMA4:FN1:COL5A1:LAMA5:LAMC1:COL2A1:HSPG2:COL1A2:COL4A1:COL4A5:DMD
REACTOME_LAMININ_INTERACTIONS	13	2	30	4.12364e-10	4.41524e-08	7.35505	LAMA3:LAMC2:COL4A4:NID2:LAMB1:LAMA1:LAMA4:COL7A1:LAMA5:LAMC1:HSPG2:COL4A1:COL4A5
REACTOME_ANCHORING_FIBRIL_FORMATION	9	1	15	1.30785e-09	1.30697e-07	6.88373	LAMA3:LAMC2:COL4A4:TLL2:COL1A1:COL7A1:COL1A2:COL4A1:COL4A5
REACTOME_INTEGRIN_CELL_SURFACE_INTERACTIONS	21	6	85	3.33009e-09	3.11988e-07	6.50586	COL5A3:COL4A4:COL16A1:COL9A3:ICAM5:COMP:COL1A1:VWF:COL9A1:COL7A1:ITGB6:FN1:KDR:COL5A1:COL2A1:HSPG2:COL6A3:COL1A2:COL4A1:COL4A5:COL6A6
REACTOME_PROTEIN_PROTEIN_INTERACTIONS_AT_SYNAPSES	21	6	88	6.72915e-09	5.93353e-07	6.22669	NRXN3:APBA1:GRIA3:NTRK3:SYT2:DLG2:PTPRD:LRFN2:GRIN2C:SHANK1:SHANK2:LRRTM1:SLITRK5:NLGN1:DLGAP1:SYT9:SYT12:GRIN1:SLITRK6:DLGAP2:GRIN2B
REACTOME_COLLAGEN_DEGRADATION	17	4	64	2.18626e-08	1.82067e-06	5.73977	COL11A1:COL17A1:COL5A3:COL4A4:COL16A1:COL9A3:COL1A1:COL12A1:COL9A1:COL7A1:COL5A1:COL2A1:COL6A3:COL1A2:COL4A1:COL4A5:COL6A6
REACTOME_NEUREXINS_AND_NEUROLIGINS	15	4	57	1.37242e-07	1.05673e-05	4.97604	NRXN3:APBA1:SYT2:DLG2:GRIN2C:SHANK1:SHANK2:LRRTM1:NLGN1:DLGAP1:SYT9:SYT12:GRIN1:DLGAP2:GRIN2B
REACTOME_SIGNALING_BY_MET	18	5	79	1.40991e-07	1.05673e-05	4.97604	LAMA3:LAMC2:COL11A1:COL5A3:LAMB1:LAMA1:COL1A1:GAB1:HGFAC:LAMA4:FN1:COL5A1:LAMA5:LAMC1:TNS3:COL2A1:COL1A2:COL24A1
REACTOME_MUSCLE_CONTRACTION	32	13	207	2.24302e-07	1.60109e-05	4.79558	VIM:KCNH2:MYLK:ATP2B3:ABCC9:NOS1:SORBS1:KCNK10:SLC8A3:CACNA1F:CALD1:MYH8:MYBPC3:ANXA1:DYSF:CACNG8:SCN2B:CACNA1C:GUCY1A2:CACNA2D1:ATP2B2:CACNA1D:SCN11A:KCNK9:NPPA:KCNIP1:SLC8A1:MYBPC1:MYH6:RYR2:RYR3:DMD
REACTOME_TRANSMISSION_ACROSS_CHEMICAL_SYNAPSES	38	17	269	2.3982e-07	1.63405e-05	4.78673	LRRC7:ADCY2:RIMS1:CHRNA4:NCALD:SLC1A6:APBA1:SLC1A2:SLC22A2:PRKAG3:GRIN3B:GRIA2:GRIA3:ADCY4:CACNG8:GRIP2:CACNA1B:DLG2:KCNJ6:GRIN2C:SLC1A7:PRKAA2:KCNJ9:GRIK3:GRIK2:ADCY1:GABRB3:GNG4:ADCY5:CHRNA9:GRIN1:ERBB4:SYN3:GLRA4:CACNA1E:GNAT3:TUBB8:GRIN2B
REACTOME_DISEASES_ASSOCIATED_WITH_O_GLYCOSYLATION_OF_PROTEINS	16	5	68	3.52885e-07	2.29989e-05	4.63829	NOTCH3:SEMA5B:ADAMTS2:SEMA5A:MUC5B:ADAMTS7:ADAMTS17:ADAMTS18:ADAMTS12:ADAMTSL3:ADAMTS9:MUCL1:MUC16:THSD4:SSPO:MUC5AC
REACTOME_INTERACTION_BETWEEN_L1_AND_ANKYRINS	10	2	31	9.47977e-07	5.92091e-05	4.22761	SPTB:KCNQ2:SPTBN5:ANK2:SCN2B:ANK3:SPTBN4:NFASC:SPTA1:SCN11A
REACTOME_TRANSPORT_OF_SMALL_MOLECULES	75	44	728	1.11392e-06	6.67905e-05	4.17529	ABCB4:SLC11A1:BEST2:ANO2:ATP9A:ATP2B3:ABCC9:TRPM5:CLCN4:SLC12A1:ADCY2:SLC4A4:TRPM3:APOB:ABCB1:SLC15A1:HEPH:TF:SLC5A1:SLC8A3:NALCN:AQP9:ATP8B4:SGK3:SLC1A6:ATP6V0A4:CUBN:ABCC3:SLC2A9:SLC1A2:SLC22A2:ATP6V1B1:BEST3:ADCY4:UNC79:SLCO2B1:SLC44A5:SLC12A6:SLC5A2:ABCA8:SLC14A1:TTYH2:UNC80:SLC5A12:ANO4:ABCA6:ABCA10:SLC28A1:ATP2B2:SLC1A7:SLC6A20:ADCY1:ABCA1:TRPV6:LIPC:AMN:SLC43A2:GNG4:SLC30A1:SLC9C1:ADCY5:SL…
REACTOME_NEUROTRANSMITTER_RECEPTORS_AND_POSTSYNAPTIC_SIGNAL_TRANSMISSION	30	13	204	1.51416e-06	8.72973e-05	4.059	LRRC7:ADCY2:CHRNA4:NCALD:APBA1:PRKAG3:GRIN3B:GRIA2:GRIA3:ADCY4:CACNG8:GRIP2:DLG2:KCNJ6:GRIN2C:PRKAA2:KCNJ9:GRIK3:GRIK2:ADCY1:GABRB3:GNG4:ADCY5:CHRNA9:GRIN1:ERBB4:GLRA4:GNAT3:TUBB8:GRIN2B
REACTOME_O_GLYCOSYLATION_OF_TSR_DOMAIN_CONTAINING_PROTEINS	11	3	39	1.74121e-06	9.66695e-05	4.01471	SEMA5B:ADAMTS2:SEMA5A:ADAMTS7:ADAMTS17:ADAMTS18:ADAMTS12:ADAMTSL3:ADAMTS9:THSD4:SSPO
REACTOME_SIGNALING_BY_RECEPTOR_TYROSINE_KINASES	53	29	468	2.42889e-06	0.000130032	3.88595	LAMA3:LAMC2:COL11A1:ERBB3:FGFR2:FGFR3:PAK3:ADCYAP1R1:COL5A3:COL4A4:MEF2C:LAMB1:COL9A3:LAMA1:FGF9:ATP6V0A4:COL1A1:GAB1:HGFAC:COL9A1:LAMA4:FGF1:FN1:ATP6V1B1:FLT3:KDR:COL5A1:LAMA5:LAMC1:TNS3:EGF:COL2A1:NTRK3:EGFR:NTRK2:PTPRO:RIT2:FGF17:COL6A3:COL1A2:CYBB:GABRB3:AXL:COL24A1:JUP:ERBB4:CDH5:COL4A1:COL4A5:NTRK1:COL6A6:ATP6V1G2:GRIN2B
REACTOME_DEVELOPMENTAL_BIOLOGY	102	67	1104	2.63759e-06	0.000136336	3.86539	CACNA1G:PAX6:EPHA3:NGEF:SPI1:SPTB:CRMP1:KCNQ2:PLXNA2:PAK3:COL5A3:COL4A4:MEF2C:PKP1:LAMB1:SEMA6A:COL9A3:DSP:HNF4A:LAMA1:MYH14:HOXA3:GAB1:PPARGC1A:COL9A1:SEMA5A:UNC5A:NR5A2:CSF3R:PCK1:HIF3A:KRT17:CDH15:ZSCAN10:NCAN:HELZ2:COL5A1:PPARG:SPINK5:DSG3:EPHA7:LAMC1:PLXNC1:SEMA6D:SPTBN5:COL2A1:CACNG8:MEIS1:SLIT2:ANK2:EGFR:NCAM1:ST14:SCN2B:CACNA1C:ANK3:GFRA1:HHEX:LGI2:CACNA1D:SPTBN4:KRT84:TAL1:COL6A3:EOMES:N…
REACTOME_AXON_GUIDANCE	59	34	554	5.21518e-06	0.000260585	3.58405	CACNA1G:EPHA3:NGEF:SPTB:CRMP1:KCNQ2:PLXNA2:PAK3:COL5A3:COL4A4:LAMB1:SEMA6A:COL9A3:LAMA1:MYH14:GAB1:COL9A1:SEMA5A:UNC5A:NCAN:COL5A1:EPHA7:LAMC1:PLXNC1:SEMA6D:SPTBN5:COL2A1:SLIT2:ANK2:EGFR:NCAM1:SCN2B:CACNA1C:ANK3:GFRA1:CACNA1D:SPTBN4:COL6A3:NFASC:SPTA1:RET:SCN11A:GFRA2:DAB1:GRIN1:DSCAML1:UNC5C:EPHA10:CNTN2:SLIT3:COL4A1:COL4A5:RELN:DOK6:COL6A6:ARHGEF28:PLXNA4:TUBB8:GRIN2B
REACTOME_FGFR3B_LIGAND_BINDING_AND_ACTIVATION	4	1	7	1.46377e-05	0.000707805	3.15009	FGFR3:FGF9:FGF1:FGF17
REACTOME_UNBLOCKING_OF_NMDA_RECEPTORS_GLUTAMATE_BINDING_AND_ACTIVATION	7	2	21	1.64411e-05	0.000770161	3.11342	LRRC7:GRIA2:GRIA3:DLG2:GRIN2C:GRIN1:GRIN2B
REACTOME_POTASSIUM_CHANNELS	17	6	99	2.10407e-05	0.000955757	3.01965	ABCC8:KCNH2:ABCC9:KCNQ2:HCN2:KCNK10:KCNA7:KCNC1:HCN4:KCNN3:KCNJ1:KCNMA1:KCNJ6:KCNJ9:HCN1:GNG4:KCNK9
REACTOME_LONG_TERM_POTENTIATION	7	2	23	3.55783e-05	0.00156859	2.80449	LRRC7:GRIA2:DLG2:GRIN2C:GRIN1:ERBB4:GRIN2B
REACTOME_CROSSLINKING_OF_COLLAGEN_FIBRILS	6	2	18	4.85928e-05	0.00208116	2.68169	COL4A4:TLL2:COL1A1:COL1A2:COL4A1:COL4A5
REACTOME_STIMULI_SENSING_CHANNELS	17	7	106	5.44181e-05	0.00226591	2.64476	BEST2:ANO2:TRPM5:CLCN4:TRPM3:NALCN:SGK3:BEST3:UNC79:TTYH2:UNC80:ANO4:TRPV6:SLC9C1:CLCN1:RYR2:RYR3
REACTOME_NGF_INDEPENDANT_TRKA_ACTIVATION	3	1	5	6.15151e-05	0.00236439	2.62628	ADCYAP1R1:NTRK2:NTRK1
REACTOME_INTESTINAL_ABSORPTION	3	1	5	6.15151e-05	0.00236439	2.62628	NPC1L1:SLC5A1:SLC2A5
REACTOME_MECP2_REGULATES_TRANSCRIPTION_FACTORS	3	1	5	6.15151e-05	0.00236439	2.62628	RBFOX1:MEF2C:PPARG
REACTOME_OTHER_SEMAPHORIN_INTERACTIONS	6	2	19	7.29715e-05	0.00273461	2.5631	PLXNA2:SEMA6A:SEMA5A:PLXNC1:SEMA6D:PLXNA4
REACTOME_CARDIAC_CONDUCTION	20	9	139	8.00388e-05	0.0029263	2.53368	KCNH2:ATP2B3:ABCC9:NOS1:KCNK10:SLC8A3:CACNA1F:CACNG8:SCN2B:CACNA1C:CACNA2D1:ATP2B2:CACNA1D:SCN11A:KCNK9:NPPA:KCNIP1:SLC8A1:RYR2:RYR3
REACTOME_ADENYLATE_CYCLASE_INHIBITORY_PATHWAY	5	1	14	9.10522e-05	0.00318231	2.49726	ADCY2:ADCY4:ADCY1:ADCY5:GNAT3
REACTOME_L1CAM_INTERACTIONS	18	8	120	9.1287e-05	0.00318231	2.49726	SPTB:KCNQ2:LAMB1:LAMA1:NCAN:LAMC1:SPTBN5:ANK2:EGFR:NCAM1:SCN2B:ANK3:SPTBN4:NFASC:SPTA1:SCN11A:CNTN2:TUBB8
REACTOME_ION_CHANNEL_TRANSPORT	24	11	183	9.5217e-05	0.00324387	2.48894	BEST2:ANO2:ATP9A:ATP2B3:TRPM5:CLCN4:TRPM3:NALCN:ATP8B4:SGK3:ATP6V0A4:ATP6V1B1:BEST3:UNC79:TTYH2:UNC80:ANO4:ATP2B2:TRPV6:SLC9C1:CLCN1:RYR2:RYR3:ATP6V1G2
REACTOME_ADHERENS_JUNCTIONS_INTERACTIONS	8	2	33	0.000100959	0.00336305	2.47327	CDH17:CDH15:CDH11:CDH13:CDH8:JUP:CDH4:CDH5
REACTOME_ADENYLATE_CYCLASE_ACTIVATING_PATHWAY	4	1	10	0.000150842	0.0048319	2.31588	ADCY2:ADCY4:ADCY1:ADCY5
REACTOME_SYNAPTIC_ADHESION_LIKE_MOLECULES	6	2	21	0.0001515	0.0048319	2.31588	GRIA3:PTPRD:LRFN2:GRIN2C:GRIN1:GRIN2B
REACTOME_ACTIVATION_OF_TRKA_RECEPTORS	3	1	6	0.000175744	0.00526881	2.27829	ADCYAP1R1:NTRK2:NTRK1
REACTOME_METAL_SEQUESTRATION_BY_ANTIMICROBIAL_PROTEINS	3	1	6	0.000175744	0.00526881	2.27829	LTF:S100A8:S100A9
REACTOME_DIGESTION_AND_ABSORPTION	7	2	28	0.000172513	0.00526881	2.27829	NPC1L1:SLC5A1:CHIT1:CHIA:SLC2A5:PNLIPRP1:MGAM
REACTOME_NITRIC_OXIDE_STIMULATES_GUANYLATE_CYCLASE	6	2	22	0.000210775	0.00619513	2.20795	NOS1:PDE10A:PRKG2:PDE5A:GUCY1A2:KCNMA1
REACTOME_PI3K_EVENTS_IN_ERBB2_SIGNALING	5	1	16	0.000218864	0.00620815	2.20704	ERBB3:GAB1:EGF:EGFR:ERBB4
REACTOME_SLC_MEDIATED_TRANSMEMBRANE_TRANSPORT	29	16	250	0.000219501	0.00620815	2.20704	SLC11A1:SLC12A1:SLC4A4:SLC15A1:HEPH:SLC5A1:SLC8A3:SLC1A6:SLC2A9:SLC1A2:SLC22A2:SLCO2B1:SLC44A5:SLC12A6:SLC5A2:SLC14A1:SLC5A12:SLC28A1:SLC1A7:SLC6A20:SLC43A2:SLC30A1:SLCO3A1:SLC47A2:SLC8A1:SLC24A3:SLC2A10:SLC34A3:SLC6A14
REACTOME_APOPTOTIC_CLEAVAGE_OF_CELL_ADHESION_PROTEINS	4	1	11	0.000262897	0.00729783	2.13681	PKP1:DSP:TJP1:DSG3
REACTOME_O_LINKED_GLYCOSYLATION	16	7	111	0.000317476	0.00865266	2.06285	SEMA5B:ADAMTS2:SEMA5A:MUC5B:ADAMTS7:ADAMTS17:ADAMTS18:ADAMTS12:ADAMTSL3:ADAMTS9:MUCL1:GALNTL6:MUC16:THSD4:SSPO:MUC5AC
REACTOME_DISEASES_OF_GLYCOSYLATION	19	9	143	0.000339969	0.00910023	2.04095	NOTCH3:SEMA5B:ADAMTS2:SEMA5A:MUC5B:NCAN:ADAMTS7:ADAMTS17:ADAMTS18:HSPG2:ADAMTS12:ADAMTSL3:ADAMTS9:MUCL1:CSPG4:MUC16:THSD4:SSPO:MUC5AC
REACTOME_CELL_JUNCTION_ORGANIZATION	14	6	92	0.000354303	0.00915691	2.03825	CLDN11:LAMA3:LAMC2:COL17A1:CDH17:CDH15:CDH11:CDH13:SDK1:CDH8:JUP:CDH4:CDH5:PARVA
REACTOME_ACTIVATION_OF_NMDA_RECEPTORS_AND_POSTSYNAPTIC_EVENTS	14	6	92	0.000354303	0.00915691	2.03825	LRRC7:APBA1:PRKAG3:GRIN3B:GRIA2:GRIA3:DLG2:GRIN2C:PRKAA2:ADCY1:GRIN1:ERBB4:TUBB8:GRIN2B
REACTOME_RUNX2_REGULATES_BONE_DEVELOPMENT	7	2	31	0.000373007	0.00947691	2.02333	GLI2:COL1A1:HEY2:SMAD6:SMAD1:MAF:ZNF521
REACTOME_INTERLEUKIN_36_PATHWAY	3	1	7	0.000390552	0.0097573	2.01067	IL1RL2:IL36A:IL36RN
REACTOME_GABA_B_RECEPTOR_ACTIVATION	8	3	39	0.000401179	0.00985847	2.00619	ADCY2:ADCY4:KCNJ6:KCNJ9:ADCY1:GNG4:ADCY5:GNAT3
REACTOME_REDUCTION_OF_CYTOSOLIC_CAPLUSPLUS_LEVELS	4	1	12	0.000428475	0.0103594	1.98466	ATP2B3:SLC8A3:ATP2B2:SLC8A1
REACTOME_METABOLISM_OF_ANGIOTENSINOGEN_TO_ANGIOTENSINS	5	2	18	0.000457453	0.0107144	1.97003	ACE2:CPB1:ACE:ANPEP:MME
REACTOME_PI_3K_CASCADE:FGFR3	5	2	18	0.000457453	0.0107144	1.97003	FGFR3:FGF9:GAB1:FGF1:FGF17
REACTOME_TRANSPORT_OF_INORGANIC_CATIONS_ANIONS_AND_AMINO_ACIDS_OLIGOPEPTIDES	15	7	106	0.000557146	0.0127458	1.89463	SLC12A1:SLC4A4:SLC15A1:SLC8A3:SLC1A6:SLC1A2:SLC12A6:SLC5A12:SLC1A7:SLC6A20:SLC43A2:SLC8A1:SLC24A3:SLC34A3:SLC6A14
REACTOME_PLATELET_HOMEOSTASIS	13	6	86	0.000561188	0.0127458	1.89463	FGR:ATP2B3:APOB:NOS1:SLC8A3:PDE10A:PRKG2:PDE5A:GUCY1A2:KCNMA1:ATP2B2:GNG4:SLC8A1
REACTOME_SIGNALING_BY_PDGF	10	4	58	0.000577252	0.0129149	1.88891	COL5A3:COL4A4:COL9A3:COL9A1:COL5A1:COL2A1:COL6A3:COL4A1:COL4A5:COL6A6
REACTOME_FGFR2C_LIGAND_BINDING_AND_ACTIVATION	4	1	13	0.000662018	0.0137828	1.86066	FGFR2:FGF9:FGF1:FGF17
REACTOME_FGFR3_LIGAND_BINDING_AND_ACTIVATION	4	1	13	0.000662018	0.0137828	1.86066	FGFR3:FGF9:FGF1:FGF17
REACTOME_SCAVENGING_BY_CLASS_A_RECEPTORS	5	2	19	0.000634906	0.0137828	1.86066	MSR1:APOB:COL1A1:COL1A2:COL4A1
REACTOME_WNT_LIGAND_BIOGENESIS_AND_TRAFFICKING	6	2	26	0.000658553	0.0137828	1.86066	WNT11:WNT2:WLS:WNT2B:WNT9A:WNT10B
REACTOME_ERBB2_ACTIVATES_PTK6_SIGNALING	4	1	13	0.000662018	0.0137828	1.86066	ERBB3:EGF:EGFR:ERBB4
REACTOME_ASSEMBLY_AND_CELL_SURFACE_PRESENTATION_OF_NMDA_RECEPTORS	8	3	42	0.000718195	0.0147476	1.83128	LRRC7:APBA1:GRIN3B:DLG2:GRIN2C:GRIN1:TUBB8:GRIN2B
REACTOME_ENDOGENOUS_STEROLS	6	2	27	0.000843548	0.0170875	1.76732	CYP46A1:CYP27A1:CYP19A1:CYP1B1:ARNT2:CYP8B1
REACTOME_OTHER_INTERLEUKIN_SIGNALING	30	18	288	0.00113316	0.02259	1.64608	LRRC7:ERBB3:FGFR2:FGFR3:SPTB:FGF9:GAB1:VWF:FGF1:FN1:CSF3R:FLT3:SPTBN5:EGF:IL17RD:EGFR:NCAM1:DLG2:GFRA1:FGF17:SPTBN4:SPTA1:RET:GFRA2:KSR2:GRIN1:ERBB4:CSF1R:DUSP8:GRIN2B
REACTOME_NEGATIVE_REGULATION_OF_NMDA_RECEPTOR_MEDIATED_NEURONAL_TRANSMISSION	5	2	21	0.00114532	0.02259	1.64608	LRRC7:DLG2:GRIN2C:GRIN1:GRIN2B
REACTOME_ERBB2_REGULATES_CELL_MOTILITY	4	1	15	0.00139679	0.0271921	1.56556	ERBB3:EGF:EGFR:ERBB4
REACTOME_CELL_CELL_JUNCTION_ORGANIZATION	10	4	65	0.00154887	0.0297662	1.52628	CLDN11:CDH17:CDH15:CDH11:CDH13:SDK1:CDH8:JUP:CDH4:CDH5
REACTOME_MOLECULES_ASSOCIATED_WITH_ELASTIC_FIBRES	7	3	38	0.00159322	0.0298756	1.52468	FBLN1:TGFB2:ITGB6:FN1:BMP4:FBN2:FBN3
REACTOME_CONSTITUTIVE_SIGNALING_BY_ABERRANT_PI3K_IN_CANCER	11	5	75	0.00159443	0.0298756	1.52468	ERBB3:FGFR2:FGFR3:FGF9:GAB1:FGF1:CD86:EGF:EGFR:FGF17:ERBB4
REACTOME_GABA_RECEPTOR_ACTIVATION	9	4	56	0.00164755	0.0304899	1.51584	ADCY2:ADCY4:KCNJ6:KCNJ9:ADCY1:GABRB3:GNG4:ADCY5:GNAT3
REACTOME_SIGNALLING_TO_P38_VIA_RIT_AND_RIN	2	1	5	0.00197062	0.0313038	1.5044	RIT2:NTRK1
REACTOME_ABACAVIR_TRANSPORT_AND_METABOLISM	3	1	10	0.00202567	0.0313038	1.5044	ABCB1:SLC22A2:PCK1
REACTOME_IONOTROPIC_ACTIVITY_OF_KAINATE_RECEPTORS	3	1	10	0.00202567	0.0313038	1.5044	NCALD:GRIK3:GRIK2
REACTOME_CGMP_EFFECTS	4	1	16	0.00193222	0.0313038	1.5044	PDE10A:PRKG2:PDE5A:KCNMA1
REACTOME_INWARDLY_RECTIFYING_KPLUS_CHANNELS	6	2	31	0.00202554	0.0313038	1.5044	ABCC8:ABCC9:KCNJ1:KCNJ6:KCNJ9:GNG4
REACTOME_IRF3_MEDIATED_ACTIVATION_OF_TYPE_1_IFN	2	1	5	0.00197062	0.0313038	1.5044	DTX4:ZBP1
REACTOME_NEUROTOXICITY_OF_CLOSTRIDIUM_TOXINS	3	1	10	0.00202567	0.0313038	1.5044	SV2C:SYT2:SV2B
REACTOME_ACTIVATION_OF_PPARGC1A_PGC_1ALPHA_BY_PHOSPHORYLATION	3	1	10	0.00202567	0.0313038	1.5044	PPARGC1A:PRKAG3:PRKAA2
REACTOME_ABACAVIR_TRANSMEMBRANE_TRANSPORT	2	1	5	0.00197062	0.0313038	1.5044	ABCB1:SLC22A2
REACTOME_TRANSCRIPTIONAL_REGULATION_OF_PLURIPOTENT_STEM_CELLS	6	2	31	0.00202554	0.0313038	1.5044	HIF3A:ZSCAN10:HHEX:EOMES:PBX1:TDGF1
REACTOME_DEFECTIVE_GALNT3_CAUSES_FAMILIAL_HYPERPHOSPHATEMIC_TUMORAL_CALCINOSIS_HFTC	4	1	16	0.00193222	0.0313038	1.5044	MUC5B:MUCL1:MUC16:MUC5AC
REACTOME_TOXICITY_OF_BOTULINUM_TOXIN_TYPE_D_BONT_D	2	1	5	0.00197062	0.0313038	1.5044	SV2C:SV2B
REACTOME_PI_3K_CASCADE:FGFR2	5	2	23	0.00192226	0.0313038	1.5044	FGFR2:FGF9:GAB1:FGF1:FGF17
REACTOME_REELIN_SIGNALLING_PATHWAY	2	1	5	0.00197062	0.0313038	1.5044	DAB1:RELN
REACTOME_HDL_CLEARANCE	2	1	5	0.00197062	0.0313038	1.5044	CUBN:AMN
REACTOME_CHYLOMICRON_CLEARANCE	2	1	5	0.00197062	0.0313038	1.5044	APOB:LIPC
REACTOME_PKA_ACTIVATION_IN_GLUCAGON_SIGNALLING	4	2	17	0.00260349	0.0394205	1.40428	ADCY2:ADCY4:ADCY1:ADCY5
REACTOME_DEFECTIVE_C1GALT1C1_CAUSES_TN_POLYAGGLUTINATION_SYNDROME_TNPS	4	2	17	0.00260349	0.0394205	1.40428	MUC5B:MUCL1:MUC16:MUC5AC
REACTOME_DIGESTION_OF_DIETARY_CARBOHYDRATE	3	1	11	0.00303296	0.0442913	1.35368	CHIT1:CHIA:MGAM
REACTOME_SODIUM_CALCIUM_EXCHANGERS	3	1	11	0.00303296	0.0442913	1.35368	SLC8A3:SLC8A1:SLC24A3
REACTOME_TYPE_I_HEMIDESMOSOME_ASSEMBLY	3	1	11	0.00303296	0.0442913	1.35368	LAMA3:LAMC2:COL17A1
REACTOME_DOWNSTREAM_SIGNALING_OF_ACTIVATED_FGFR3	5	2	25	0.00304336	0.0442913	1.35368	FGFR3:FGF9:GAB1:FGF1:FGF17
REACTOME_SIGNALING_BY_INTERLEUKINS	54	38	631	0.00317315	0.0457361	1.33974	ALOX5:IL20RA:VIM:LRRC7:ERBB3:FGFR2:FGFR3:SPTB:MEF2C:FGF9:CCL2:GAB1:PTPN5:VWF:FGF1:CD86:FN1:IL1R1:IL1RL2:IL1RL1:CSF3R:FLT3:LAMA5:IL13RA1:ANXA1:IL36A:IL36RN:SPTBN5:EGF:IL19:IL17RD:EGFR:NCAM1:DLG2:GFRA1:FGF17:SPTBN4:S100A12:SPTA1:PTPN13:CCR1:COL1A2:RET:NOD2:GFRA2:IL12A:FPR1:KSR2:GRIN1:JUN:ERBB4:CSF1R:DUSP8:GRIN2B
REACTOME_PHOSPHOLIPASE_C_MEDIATED_CASCADE_FGFR2	4	2	18	0.00342889	0.0480365	1.31843	FGFR2:FGF9:FGF1:FGF17
REACTOME_SHC_MEDIATED_CASCADE:FGFR3	4	2	18	0.00342889	0.0480365	1.31843	FGFR3:FGF9:FGF1:FGF17
REACTOME_MAPK_FAMILY_SIGNALING_CASCADES	29	18	296	0.00339691	0.0480365	1.31843	LRRC7:ERBB3:FGFR2:FGFR3:SPTB:PAK3:FGF9:VWF:FGF1:FN1:FLT3:SPTBN5:EGF:IL17RD:EGFR:NCAM1:DLG2:GFRA1:FGF17:SPTBN4:SPTA1:RET:GFRA2:KSR2:GRIN1:JUN:ERBB4:DUSP8:GRIN2B
REACTOME_SYNTHESIS_OF_LIPOXINS_LX	2	1	6	0.00376549	0.0517841	1.2858	ALOX5:ALOX12
REACTOME_PTK6_PROMOTES_HIF1A_STABILIZATION	2	1	6	0.00376549	0.0517841	1.2858	EGFR:LRRK2
REACTOME_PHASE_0_RAPID_DEPOLARISATION	7	3	44	0.00420331	0.0572797	1.242	CACNA1F:CACNG8:SCN2B:CACNA1C:CACNA2D1:CACNA1D:SCN11A
REACTOME_FGFR1C_LIGAND_BINDING_AND_ACTIVATION	3	1	12	0.00433521	0.0580221	1.23641	FGF9:FGF1:FGF17
REACTOME_GP1B_IX_V_ACTIVATION_SIGNALLING	3	1	12	0.00433521	0.0580221	1.23641	COL1A1:VWF:COL1A2
REACTOME_PKA_MEDIATED_PHOSPHORYLATION_OF_CREB	4	2	19	0.00442674	0.0582077	1.23502	ADCY2:ADCY4:ADCY1:ADCY5
REACTOME_REGULATION_OF_TLR_BY_ENDOGENOUS_LIGAND	4	2	19	0.00442674	0.0582077	1.23502	APOB:TLR4:S100A8:S100A9
REACTOME_SEMAPHORIN_INTERACTIONS	9	4	64	0.00455306	0.0583306	1.2341	CRMP1:PLXNA2:PAK3:SEMA6A:MYH14:SEMA5A:PLXNC1:SEMA6D:PLXNA4
REACTOME_SYNDECAN_INTERACTIONS	5	2	27	0.00459174	0.0583306	1.2341	COL5A3:COL1A1:FN1:COL5A1:COL1A2
REACTOME_PHASE_2_PLATEAU_PHASE	5	2	27	0.00459174	0.0583306	1.2341	CACNA1F:CACNG8:CACNA1C:CACNA2D1:CACNA1D
REACTOME_ION_HOMEOSTASIS	8	4	54	0.00450431	0.0583306	1.2341	ATP2B3:ABCC9:NOS1:SLC8A3:ATP2B2:SLC8A1:RYR2:RYR3
REACTOME_CELL_CELL_COMMUNICATION	15	8	130	0.00483117	0.060578	1.21769	CLDN11:LAMA3:LAMC2:COL17A1:CDH17:CDH15:CDH11:CDH13:SDK1:KIRREL3:CDH8:JUP:CDH4:CDH5:PARVA
REACTOME_ELASTIC_FIBRE_FORMATION	7	3	45	0.00484947	0.060578	1.21769	FBLN1:TGFB2:ITGB6:FN1:BMP4:FBN2:FBN3
REACTOME_STRIATED_MUSCLE_CONTRACTION	6	3	36	0.00495425	0.0608722	1.21558	VIM:MYH8:MYBPC3:MYBPC1:MYH6:DMD
REACTOME_ROS_AND_RNS_PRODUCTION_IN_PHAGOCYTES	6	3	36	0.00495425	0.0608722	1.21558	SLC11A1:NOS1:ATP6V0A4:ATP6V1B1:CYBB:ATP6V1G2
REACTOME_FGFR2_LIGAND_BINDING_AND_ACTIVATION	4	2	20	0.00561519	0.0662769	1.17864	FGFR2:FGF9:FGF1:FGF17
REACTOME_RECEPTOR_TYPE_TYROSINE_PROTEIN_PHOSPHATASES	4	2	20	0.00561519	0.0662769	1.17864	NTRK3:PTPRD:SLITRK5:SLITRK6
REACTOME_RAS_ACTIVATION_UPON_CA2PLUS_INFLUX_THROUGH_NMDA_RECEPTOR	4	2	20	0.00561519	0.0662769	1.17864	LRRC7:DLG2:GRIN1:GRIN2B
REACTOME_FRS_MEDIATED_FGFR3_SIGNALING	4	2	20	0.00561519	0.0662769	1.17864	FGFR3:FGF9:FGF1:FGF17
REACTOME_PI_3K_CASCADE:FGFR4	4	2	20	0.00561519	0.0662769	1.17864	FGF9:GAB1:FGF1:FGF17
REACTOME_CATION_COUPLED_CHLORIDE_COTRANSPORTERS	2	1	7	0.00629669	0.0726057	1.13903	SLC12A1:SLC12A6
REACTOME_ACTIVATED_NTRK2_SIGNALS_THROUGH_PI3K	2	1	7	0.00629669	0.0726057	1.13903	GAB1:NTRK2
REACTOME_ACTIVATED_NTRK2_SIGNALS_THROUGH_FYN	2	1	7	0.00629669	0.0726057	1.13903	NTRK2:GRIN2B
REACTOME_G_ALPHA_I_SIGNALLING_EVENTS	36	25	403	0.00645931	0.0739123	1.13128	CNGB1:ADCY2:LRP2:APOB:HRH3:GRM6:GRK7:RPE65:RGSL1:GRM4:OPN5:ADCY4:SAG:PPP1R1B:ANXA1:MYO7A:STRA6:HSPG2:RGR:PDE1C:CCR1:GRM2:NPY5R:ADCY1:GNG4:TAS1R3:FPR1:ADCY5:PCP2:GRM8:S1PR5:PDE4B:C5AR1:LPAR1:ABCA4:GNAT3
REACTOME_APOPTOTIC_CLEAVAGE_OF_CELLULAR_PROTEINS	6	3	38	0.00675084	0.0749593	1.12517	VIM:PKP1:DSP:TJP1:DSG3:GSN
REACTOME_SMOOTH_MUSCLE_CONTRACTION	6	3	38	0.00675084	0.0749593	1.12517	MYLK:SORBS1:CALD1:ANXA1:DYSF:GUCY1A2
REACTOME_SIGNALING_BY_INSULIN_RECEPTOR	10	5	78	0.00664951	0.0749593	1.12517	FGFR2:FGFR3:FGF9:ATP6V0A4:GAB1:FGF1:ATP6V1B1:FLT3:FGF17:ATP6V1G2
REACTOME_EPHA_MEDIATED_GROWTH_CONE_COLLAPSE	5	2	29	0.00665332	0.0749593	1.12517	EPHA3:NGEF:MYH14:EPHA7:EPHA10
REACTOME_CELLULAR_HEXOSE_TRANSPORT	4	2	21	0.00701202	0.0761668	1.11823	SLC5A1:SLC2A9:SLC5A2:SLC2A10
REACTOME_PI_3K_CASCADE:FGFR1	4	2	21	0.00701202	0.0761668	1.11823	FGF9:GAB1:FGF1:FGF17
REACTOME_BLOOD_GROUP_SYSTEMS_BIOSYNTHESIS	4	2	21	0.00701202	0.0761668	1.11823	ST3GAL6:B3GALT1:FUT9:B3GALT5
REACTOME_G_ALPHA_Z_SIGNALLING_EVENTS	7	3	48	0.00724918	0.077618	1.11004	ADCY2:RGSL1:ADCY4:ADCY1:GNG4:ADCY5:GNAT3
REACTOME_IRS_MEDIATED_SIGNALLING	7	3	48	0.00724918	0.077618	1.11004	FGFR2:FGFR3:FGF9:GAB1:FGF1:FLT3:FGF17
REACTOME_SYNTHESIS_OF_BILE_ACIDS_AND_BILE_SALTS_VIA_24_HYDROXYCHOLESTEROL	3	1	14	0.00796314	0.0828941	1.08148	CYP46A1:CYP27A1:CYP8B1
REACTOME_SIGNALING_BY_EGFRVIII_IN_CANCER	3	1	14	0.00796314	0.0828941	1.08148	GAB1:EGF:EGFR
REACTOME_DOWNSTREAM_SIGNALING_OF_ACTIVATED_FGFR2	5	2	30	0.00790356	0.0828941	1.08148	FGFR2:FGF9:GAB1:FGF1:FGF17
REACTOME_FOXO_MEDIATED_TRANSCRIPTION_OF_OXIDATIVE_STRESS_METABOLIC_AND_NEURONAL_GENES	5	2	30	0.00790356	0.0828941	1.08148	PPARGC1A:PCK1:ABCA6:TRIM63:PLXNA4
REACTOME_IMMUNOREGULATORY_INTERACTIONS_BETWEEN_A_LYMPHOID_AND_A_NON_LYMPHOID_CELL	19	12	186	0.00815908	0.084348	1.07393	COL17A1:LILRB1:ICAM5:COL1A1:CRTAM:TREML2:LILRB2:COL2A1:CD96:COL1A2:CD300E:LILRA5:SELL:KIR2DL4:NCR1:SH2D1B:FCGR3A:IGLV3-21:LILRA2
REACTOME_SHC1_EVENTS_IN_ERBB2_SIGNALING	4	2	22	0.00863445	0.088651	1.05232	ERBB3:EGF:EGFR:ERBB4
REACTOME_TERMINAL_PATHWAY_OF_COMPLEMENT	2	1	8	0.00962831	0.0943322	1.02534	C7:C9
REACTOME_REGULATION_OF_GENE_EXPRESSION_IN_EARLY_PANCREATIC_PRECURSOR_CELLS	2	1	8	0.00962831	0.0943322	1.02534	NR5A2:ONECUT3
REACTOME_DEFECTIVE_CHST3_CAUSES_SEDCJD	2	1	8	0.00962831	0.0943322	1.02534	NCAN:CSPG4
REACTOME_DEFECTIVE_CHST14_CAUSES_EDS_MUSCULOCONTRACTURAL_TYPE	2	1	8	0.00962831	0.0943322	1.02534	NCAN:CSPG4
REACTOME_DEFECTIVE_CHSY1_CAUSES_TPBS	2	1	8	0.00962831	0.0943322	1.02534	NCAN:CSPG4
REACTOME_NETRIN_MEDIATED_REPULSION_SIGNALS	2	1	8	0.00962831	0.0943322	1.02534	UNC5A:UNC5C
REACTOME_FORMYL_PEPTIDE_RECEPTORS_BIND_FORMYL_PEPTIDES_AND_MANY_OTHER_LIGANDS	2	1	8	0.00962831	0.0943322	1.02534	ANXA1:FPR1
REACTOME_TERMINATION_OF_O_GLYCAN_BIOSYNTHESIS	4	2	23	0.0104989	0.098362	1.00717	MUC5B:MUCL1:MUC16:MUC5AC
REACTOME_PLATELET_ADHESION_TO_EXPOSED_COLLAGEN	3	1	15	0.0103509	0.098362	1.00717	COL1A1:VWF:COL1A2
REACTOME_NEUROTRANSMITTER_RELEASE_CYCLE	7	4	51	0.0104503	0.098362	1.00717	RIMS1:SLC1A6:APBA1:SLC1A2:SLC22A2:SLC1A7:SYN3
REACTOME_THE_CANONICAL_RETINOID_CYCLE_IN_RODS_TWILIGHT_VISION	4	2	23	0.0104989	0.098362	1.00717	RPE65:MYO7A:STRA6:ABCA4
REACTOME_PHOSPHOLIPASE_C_MEDIATED_CASCADE_FGFR4	3	1	15	0.0103509	0.098362	1.00717	FGF9:FGF1:FGF17
REACTOME_SHC_MEDIATED_CASCADE:FGFR2	4	2	23	0.0104989	0.098362	1.00717	FGFR2:FGF9:FGF1:FGF17
REACTOME_DIGESTION	4	2	23	0.0104989	0.098362	1.00717	CHIT1:CHIA:PNLIPRP1:MGAM
REACTOME_GLUTAMATE_NEUROTRANSMITTER_RELEASE_CYCLE	4	2	24	0.0126211	0.116411	0.934005	RIMS1:SLC1A6:SLC1A2:SLC1A7
REACTOME_GLUCAGON_SIGNALING_IN_METABOLIC_REGULATION	5	2	33	0.0126585	0.116411	0.934005	ADCY2:ADCY4:ADCY1:GNG4:ADCY5
REACTOME_RUNX2_REGULATES_OSTEOBLAST_DIFFERENTIATION	4	2	24	0.0126211	0.116411	0.934005	COL1A1:HEY2:MAF:ZNF521
REACTOME_GRB2_EVENTS_IN_ERBB2_SIGNALING	3	1	16	0.0131571	0.116701	0.932924	EGF:EGFR:ERBB4
REACTOME_CRMPS_IN_SEMA3A_SIGNALING	3	1	16	0.0131571	0.116701	0.932924	CRMP1:PLXNA2:PLXNA4
REACTOME_SEMA3A_PAK_DEPENDENT_AXON_REPULSION	3	1	16	0.0131571	0.116701	0.932924	PLXNA2:PAK3:PLXNA4
REACTOME_FGFR1_LIGAND_BINDING_AND_ACTIVATION	3	1	16	0.0131571	0.116701	0.932924	FGF9:FGF1:FGF17
REACTOME_NEUTROPHIL_DEGRANULATION	40	29	478	0.0131165	0.116701	0.932924	FGR:MGST1:LTF:ALOX5:SLC11A1:LRRC7:PKP1:LYZ:DSP:BPI:CST3:CRISPLD2:ATP8B4:PADI2:PTPRB:LILRB2:LGALS3:CHIT1:GLIPR1:SLC2A5:S100A8:GSN:MS4A3:PIGR:S100A9:S100A12:NFASC:CYBB:ANPEP:KRT1:FPR1:JUP:ABCA13:SELL:MME:SERPINA1:C5AR1:HBB:MGAM:CLEC5A
REACTOME_CHAPERONE_MEDIATED_AUTOPHAGY	3	1	16	0.0131571	0.116701	0.932924	PRKAG3:PRKAA2:HBB
REACTOME_OPSINS	2	1	9	0.0138046	0.118926	0.924724	OPN5:RGR
REACTOME_CA2PLUS_ACTIVATED_KPLUS_CHANNELS	2	1	9	0.0138046	0.118926	0.924724	KCNN3:KCNMA1
REACTOME_AMINO_ACID_CONJUGATION	2	1	9	0.0138046	0.118926	0.924724	ACSM2B:ACSM2A
REACTOME_EGFR_INTERACTS_WITH_PHOSPHOLIPASE_C_GAMMA	2	1	9	0.0138046	0.118926	0.924724	EGF:EGFR
REACTOME_LIPOPHAGY	2	1	9	0.0138046	0.118926	0.924724	PRKAG3:PRKAA2
REACTOME_INSULIN_RECEPTOR_SIGNALLING_CASCADE	7	4	54	0.0145945	0.1236	0.907982	FGFR2:FGFR3:FGF9:GAB1:FGF1:FLT3:FGF17
REACTOME_NEGATIVE_REGULATION_OF_THE_PI3K_AKT_NETWORK	12	7	110	0.0144817	0.1236	0.907982	ERBB3:FGFR2:FGFR3:FGF9:GAB1:FGF1:CD86:IL1RL1:EGF:EGFR:FGF17:ERBB4
REACTOME_SIGNALING_BY_TYPE_1_INSULIN_LIKE_GROWTH_FACTOR_1_RECEPTOR_IGF1R	7	4	54	0.0145945	0.1236	0.907982	FGFR2:FGFR3:FGF9:GAB1:FGF1:FLT3:FGF17
REACTOME_FRS_MEDIATED_FGFR2_SIGNALING	4	2	25	0.0150156	0.125745	0.90051	FGFR2:FGF9:FGF1:FGF17
REACTOME_NOTCH3_INTRACELLULAR_DOMAIN_REGULATES_TRANSCRIPTION	4	2	25	0.0150156	0.125745	0.90051	NOTCH3:HEY2:MAML2:PBX1
REACTOME_GAB1_SIGNALOSOME	3	2	17	0.0164044	0.135526	0.867977	GAB1:EGF:EGFR
REACTOME_TRAFFICKING_OF_GLUR2_CONTAINING_AMPA_RECEPTORS	3	2	17	0.0164044	0.135526	0.867977	GRIA2:GRIA3:GRIP2
REACTOME_SLC_TRANSPORTER_DISORDERS	11	7	100	0.0164548	0.135526	0.867977	SLC12A1:SLC4A4:HEPH:SLC5A1:SLC2A9:SLC12A6:SLC5A2:SLC6A20:SLC2A10:SLC34A3:SLC6A14
REACTOME_REGULATION_OF_INSULIN_LIKE_GROWTH_FACTOR_IGF_TRANSPORT_AND_UPTAKE_BY_INSULIN_LIKE_GROWTH_FACTOR_BINDING_PROTEINS_IGFBPS	13	8	124	0.0166121	0.136074	0.866225	APOB:LAMB1:TF:CST3:FN1:PAPPA2:BMP4:LAMC1:IGFBP3:KLK2:PAPPA:GAS6:SERPINA1
REACTOME_A_TETRASACCHARIDE_LINKER_SEQUENCE_IS_REQUIRED_FOR_GAG_SYNTHESIS	4	2	26	0.0176957	0.143383	0.843501	B3GAT1:NCAN:HSPG2:CSPG4
REACTOME_DECTIN_2_FAMILY	4	2	26	0.0176957	0.143383	0.843501	MUC5B:MUCL1:MUC16:MUC5AC
REACTOME_FGFR2B_LIGAND_BINDING_AND_ACTIVATION	2	1	10	0.0188527	0.148321	0.828796	FGFR2:FGF1
REACTOME_THYROXINE_BIOSYNTHESIS	2	1	10	0.0188527	0.148321	0.828796	IYD:DUOX2
REACTOME_PI3K_AKT_SIGNALING_IN_CANCER	11	7	102	0.0189978	0.148321	0.828796	ERBB3:FGFR2:FGFR3:FGF9:GAB1:FGF1:CD86:EGF:EGFR:FGF17:ERBB4
REACTOME_POU5F1_OCT4_SOX2_NANOG_REPRESS_GENES_RELATED_TO_DIFFERENTIATION	2	1	10	0.0188527	0.148321	0.828796	HHEX:EOMES
REACTOME_REGULATION_OF_COMMISSURAL_AXON_PATHFINDING_BY_SLIT_AND_ROBO	2	1	10	0.0188527	0.148321	0.828796	SLIT2:SLIT3
REACTOME_INTERLEUKIN_10_SIGNALING	6	3	46	0.0189412	0.148321	0.828796	CCL2:CD86:IL1R1:CCR1:IL12A:FPR1
REACTOME_SIGNALING_BY_FGFR3_FUSIONS_IN_CANCER	2	1	10	0.0188527	0.148321	0.828796	FGFR3:GAB1
REACTOME_CA_DEPENDENT_EVENTS	5	3	36	0.0191272	0.148558	0.828104	ADCY2:ADCY4:PDE1C:ADCY1:ADCY5
REACTOME_METABOLISM_OF_AMINE_DERIVED_HORMONES	3	2	18	0.0201117	0.154602	0.810784	IYD:DBH:DUOX2
REACTOME_SIGNALING_BY_LIGAND_RESPONSIVE_EGFR_VARIANTS_IN_CANCER	3	2	18	0.0201117	0.154602	0.810784	GAB1:EGF:EGFR
REACTOME_DOWNSTREAM_SIGNALING_OF_ACTIVATED_FGFR4	4	2	27	0.0206739	0.158113	0.801032	FGF9:GAB1:FGF1:FGF17
REACTOME_FORMATION_OF_THE_CORNIFIED_ENVELOPE	13	8	128	0.0213557	0.162498	0.789151	PKP1:DSP:KRT17:SPINK5:DSG3:ST14:KRT84:KRT1:KRT4:KRT2:JUP:DSG4:KRT77
REACTOME_SIGNALING_BY_BMP	4	2	28	0.0239611	0.176123	0.754185	SMAD6:BMPR1B:ACVRL1:SMAD1
REACTOME_PLATELET_CALCIUM_HOMEOSTASIS	4	2	28	0.0239611	0.176123	0.754185	ATP2B3:SLC8A3:ATP2B2:SLC8A1
REACTOME_ARACHIDONIC_ACID_METABOLISM	7	4	59	0.0239687	0.176123	0.754185	ALOX5:PTGDS:ALOX12:CYP1B1:DPEP3:FAAH2:CYP8B1
REACTOME_ADRENALINE_NORADRENALINE_INHIBITS_INSULIN_SECRETION	4	2	28	0.0239611	0.176123	0.754185	CACNA1C:CACNA1D:GNG4:ADCY5
REACTOME_CREB1_PHOSPHORYLATION_THROUGH_NMDA_RECEPTOR_MEDIATED_ACTIVATION_OF_RAS_SIGNALING	4	2	28	0.0239611	0.176123	0.754185	LRRC7:DLG2:GRIN1:GRIN2B
REACTOME_CARGO_RECOGNITION_FOR_CLATHRIN_MEDIATED_ENDOCYTOSIS	11	7	105	0.0233479	0.176123	0.754185	SNAP91:LRP2:APOB:TF:SGIP1:EGF:SYT2:EGFR:DAB2:REPS2:SYT9
REACTOME_DOWNREGULATION_OF_ERBB2_SIGNALING	4	2	28	0.0239611	0.176123	0.754185	ERBB3:EGF:EGFR:ERBB4
REACTOME_HIGHLY_CALCIUM_PERMEABLE_POSTSYNAPTIC_NICOTINIC_ACETYLCHOLINE_RECEPTORS	2	1	11	0.0247851	0.176918	0.752227	CHRNA4:CHRNA9
REACTOME_VITAMIN_D_CALCIFEROL_METABOLISM	2	1	11	0.0247851	0.176918	0.752227	LRP2:CUBN
REACTOME_DERMATAN_SULFATE_BIOSYNTHESIS	2	1	11	0.0247851	0.176918	0.752227	NCAN:CSPG4
REACTOME_ACTIVATION_OF_THE_PHOTOTRANSDUCTION_CASCADE	2	1	11	0.0247851	0.176918	0.752227	CNGB1:SAG
REACTOME_NAPLUS_CL_DEPENDENT_NEUROTRANSMITTER_TRANSPORTERS	3	2	19	0.0242944	0.176918	0.752227	SLC22A2:SLC6A20:SLC6A14
REACTOME_ASPARTATE_AND_ASPARAGINE_METABOLISM	2	1	11	0.0247851	0.176918	0.752227	GADL1:ASPG
REACTOME_CLASS_B_2_SECRETIN_FAMILY_RECEPTORS	10	6	94	0.0249768	0.177442	0.750944	ADCYAP1R1:WNT11:WNT2:FZD10:CRHR1:WNT2B:WNT9A:PTH1R:GNG4:WNT10B
REACTOME_SIGNALING_BY_NOTCH3	6	3	49	0.0260624	0.184281	0.734519	NOTCH3:HEY2:EGF:EGFR:MAML2:PBX1
REACTOME_DAG_AND_IP3_SIGNALING	5	3	40	0.0308215	0.189132	0.723235	ADCY2:ADCY4:PDE1C:ADCY1:ADCY5
REACTOME_CASPASE_MEDIATED_CLEAVAGE_OF_CYTOSKELETAL_PROTEINS	2	1	12	0.0316017	0.189132	0.723235	VIM:GSN
REACTOME_CLASS_C_3_METABOTROPIC_GLUTAMATE_PHEROMONE_RECEPTORS	5	3	39	0.0275469	0.189132	0.723235	GRM6:GRM4:GRM2:TAS1R3:GRM8
REACTOME_CD28_DEPENDENT_VAV1_PATHWAY	2	1	12	0.0316017	0.189132	0.723235	PAK3:CD86
REACTOME_MYOGENESIS	4	2	29	0.0275669	0.189132	0.723235	MEF2C:CDH15:CDH4:TCF4
REACTOME_ACTIVATION_OF_KAINATE_RECEPTORS_UPON_GLUTAMATE_BINDING	4	2	30	0.0314995	0.189132	0.723235	NCALD:GRIK3:GRIK2:GNG4
REACTOME_TRANSPORT_OF_ORGANIC_ANIONS	2	1	12	0.0316017	0.189132	0.723235	SLCO2B1:SLCO3A1
REACTOME_PLATELET_AGGREGATION_PLUG_FORMATION	5	3	39	0.0275469	0.189132	0.723235	COL1A1:VWF:FN1:MPL:COL1A2
REACTOME_TANDEM_PORE_DOMAIN_POTASSIUM_CHANNELS	2	1	12	0.0316017	0.189132	0.723235	KCNK10:KCNK9
REACTOME_RELEASE_OF_APOPTOTIC_FACTORS_FROM_THE_MITOCHONDRIA	1	1	5	0.0319215	0.189132	0.723235	2022-09-04
REACTOME_PRESYNAPTIC_DEPOLARIZATION_AND_CALCIUM_CHANNEL_OPENING	2	1	12	0.0316017	0.189132	0.723235	CACNA1B:CACNA1E
REACTOME_GRB7_EVENTS_IN_ERBB2_SIGNALING	1	1	5	0.0319215	0.189132	0.723235	ERBB3
REACTOME_EXTRINSIC_PATHWAY_OF_FIBRIN_CLOT_FORMATION	1	1	5	0.0319215	0.189132	0.723235	TFPI
REACTOME_SYNTHESIS_OF_PI	1	1	5	0.0319215	0.189132	0.723235	CDS1
REACTOME_HYALURONAN_BIOSYNTHESIS_AND_EXPORT	1	1	5	0.0319215	0.189132	0.723235	HAS1
REACTOME_ABACAVIR_METABOLISM	1	1	5	0.0319215	0.189132	0.723235	PCK1
REACTOME_SUMOYLATION_OF_TRANSCRIPTION_FACTORS	3	2	20	0.0289641	0.189132	0.723235	TFAP2A:CDKN2A:MITF
REACTOME_DEFECTIVE_B4GALT7_CAUSES_EDS_PROGEROID_TYPE	3	2	20	0.0289641	0.189132	0.723235	NCAN:HSPG2:CSPG4
REACTOME_LEUKOTRIENE_RECEPTORS	1	1	5	0.0319215	0.189132	0.723235	CYSLTR1
REACTOME_SODIUM_COUPLED_PHOSPHATE_COTRANSPORTERS	1	1	5	0.0319215	0.189132	0.723235	SLC34A3
REACTOME_DEFECTIVE_LFNG_CAUSES_SCDO3	1	1	5	0.0319215	0.189132	0.723235	NOTCH3
REACTOME_UPTAKE_AND_ACTIONS_OF_BACTERIAL_TOXINS	4	2	29	0.0275669	0.189132	0.723235	SV2C:SYT2:ANTXR2:SV2B
REACTOME_NEGATIVE_REGULATION_OF_TCF_DEPENDENT_SIGNALING_BY_DVL_INTERACTING_PROTEINS	1	1	5	0.0319215	0.189132	0.723235	CXXC4
REACTOME_SHC_MEDIATED_CASCADE:FGFR4	3	2	20	0.0289641	0.189132	0.723235	FGF9:FGF1:FGF17
REACTOME_NEGATIVE_REGULATION_OF_FGFR3_SIGNALING	4	2	29	0.0275669	0.189132	0.723235	FGFR3:FGF9:FGF1:FGF17
REACTOME_SIGNALING_BY_FGFR3	5	3	40	0.0308215	0.189132	0.723235	FGFR3:FGF9:GAB1:FGF1:FGF17
REACTOME_MELANIN_BIOSYNTHESIS	1	1	5	0.0319215	0.189132	0.723235	DCT
REACTOME_TP53_REGULATES_TRANSCRIPTION_OF_CASPASE_ACTIVATORS_AND_CASPASES	2	1	12	0.0316017	0.189132	0.723235	TP63:NLRC4
REACTOME_TP53_REGULATES_TRANSCRIPTION_OF_DEATH_RECEPTORS_AND_LIGANDS	2	1	12	0.0316017	0.189132	0.723235	TP63:IGFBP3
REACTOME_FRUCTOSE_CATABOLISM	1	1	5	0.0319215	0.189132	0.723235	ALDH1A1
REACTOME_RESPONSE_TO_ELEVATED_PLATELET_CYTOSOLIC_CA2PLUS	13	8	132	0.0270515	0.189132	0.723235	RAB27B:TF:TGFB2:VWF:FN1:PLEK:MMRN1:EGF:LHFPL2:PCDH7:SELP:GAS6:SERPINA1
REACTOME_BETA_OXIDATION_OF_LAUROYL_COA_TO_DECANOYL_COA_COA	1	1	5	0.0319215	0.189132	0.723235	ACADL
REACTOME_MET_ACTIVATES_PTPN11	1	1	5	0.0319215	0.189132	0.723235	GAB1
REACTOME_VLDL_ASSEMBLY	1	1	5	0.0319215	0.189132	0.723235	APOB
REACTOME_TFAP2_AP_2_FAMILY_REGULATES_TRANSCRIPTION_OF_CELL_CYCLE_FACTORS	1	1	5	0.0319215	0.189132	0.723235	TFAP2A
REACTOME_TFAP2A_ACTS_AS_A_TRANSCRIPTIONAL_REPRESSOR_DURING_RETINOIC_ACID_INDUCED_CELL_DIFFERENTIATION	1	1	5	0.0319215	0.189132	0.723235	TFAP2A
REACTOME_MET_INTERACTS_WITH_TNS_PROTEINS	1	1	5	0.0319215	0.189132	0.723235	TNS3
REACTOME_RUNX1_REGULATES_EXPRESSION_OF_COMPONENTS_OF_TIGHT_JUNCTIONS	1	1	5	0.0319215	0.189132	0.723235	TJP1
REACTOME_RUNX2_REGULATES_CHONDROCYTE_MATURATION	1	1	5	0.0319215	0.189132	0.723235	GLI2
REACTOME_BIOSYNTHESIS_OF_E_SERIES_18_S_RESOLVINS	1	1	5	0.0319215	0.189132	0.723235	ALOX5
REACTOME_NTRK2_ACTIVATES_RAC1	1	1	5	0.0319215	0.189132	0.723235	NTRK2
REACTOME_TRANSPORT_OF_BILE_SALTS_AND_ORGANIC_ACIDS_METAL_IONS_AND_AMINE_COMPOUNDS	9	6	86	0.0329244	0.194306	0.711514	SLC11A1:HEPH:SLC22A2:SLC44A5:SLC14A1:SLC6A20:SLC30A1:SLC47A2:SLC6A14
REACTOME_REGULATION_OF_FZD_BY_UBIQUITINATION	3	2	21	0.0341293	0.199066	0.701004	LGR6:LGR5:LGR4
REACTOME_RHO_GTPASES_ACTIVATE_PAKS	3	2	21	0.0341293	0.199066	0.701004	MYLK:PAK3:MYH14
REACTOME_SHC_MEDIATED_CASCADE:FGFR1	3	2	21	0.0341293	0.199066	0.701004	FGF9:FGF1:FGF17
REACTOME_RET_SIGNALING	5	3	41	0.0343403	0.19952	0.700014	GAB1:GFRA1:RET:GFRA2:DOK6
REACTOME_AQUAPORIN_MEDIATED_TRANSPORT	6	4	52	0.0348217	0.20076	0.697322	ADCY2:AQP9:ADCY4:ADCY1:GNG4:ADCY5
REACTOME_APOPTOTIC_EXECUTION_PHASE	6	4	52	0.0348217	0.20076	0.697322	VIM:PKP1:DSP:TJP1:DSG3:GSN
REACTOME_TRANSFERRIN_ENDOCYTOSIS_AND_RECYCLING	4	2	31	0.0357659	0.203852	0.690685	TF:ATP6V0A4:ATP6V1B1:ATP6V1G2
REACTOME_GLUTAMATE_BINDING_ACTIVATION_OF_AMPA_RECEPTORS_AND_SYNAPTIC_PLASTICITY	4	2	31	0.0357659	0.203852	0.690685	GRIA2:GRIA3:CACNG8:GRIP2
REACTOME_DOWNSTREAM_SIGNALING_OF_ACTIVATED_FGFR1	4	2	31	0.0357659	0.203852	0.690685	FGF9:GAB1:FGF1:FGF17
REACTOME_VISUAL_PHOTOTRANSDUCTION	10	7	100	0.037208	0.211268	0.675166	CNGB1:LRP2:APOB:GRK7:RPE65:SAG:MYO7A:STRA6:HSPG2:ABCA4
REACTOME_REGULATION_OF_BETA_CELL_DEVELOPMENT	5	3	42	0.0381084	0.21486	0.667845	PAX6:HNF4A:NR5A2:MAML2:ONECUT3
REACTOME_G_PROTEIN_MEDIATED_EVENTS	6	4	53	0.0381272	0.21486	0.667845	ADCY2:ADCY4:PDE1C:ADCY1:ADCY5:GNAT3
REACTOME_ADVANCED_GLYCOSYLATION_ENDPRODUCT_RECEPTOR_SIGNALING	2	1	13	0.0392919	0.218954	0.659647	LGALS3:S100A12
REACTOME_DISEASES_ASSOCIATED_WITH_VISUAL_TRANSDUCTION	2	1	13	0.0392919	0.218954	0.659647	STRA6:ABCA4
REACTOME_ACTIVATION_OF_RAC1	2	1	13	0.0392919	0.218954	0.659647	PAK3:SLIT2
REACTOME_FRS_MEDIATED_FGFR4_SIGNALING	3	2	22	0.0397949	0.220935	0.655735	FGF9:FGF1:FGF17
REACTOME_OPIOID_SIGNALLING	9	6	89	0.040357	0.223229	0.651249	ADCY2:ADCY4:PPP1R1B:PDE1C:ADCY1:GNG4:ADCY5:PDE4B:GNAT3
REACTOME_VASOPRESSIN_REGULATES_RENAL_WATER_HOMEOSTASIS_VIA_AQUAPORINS	5	3	43	0.04213	0.231329	0.635769	ADCY2:ADCY4:ADCY1:GNG4:ADCY5
REACTOME_SIGNALING_BY_FGFR2_IN_DISEASE	5	3	43	0.04213	0.231329	0.635769	FGFR2:FGF9:GAB1:FGF1:FGF17
REACTOME_DOPAMINE_NEUROTRANSMITTER_RELEASE_CYCLE	3	2	23	0.0459624	0.234535	0.629792	RIMS1:APBA1:SYN3
REACTOME_INCRETIN_SYNTHESIS_SECRETION_AND_INACTIVATION	3	2	23	0.0459624	0.234535	0.629792	PAX6:TCF7L2:GNAT3
REACTOME_FIBRONECTIN_MATRIX_FORMATION	1	1	6	0.0459995	0.234535	0.629792	FN1
REACTOME_CONJUGATION_OF_BENZOATE_WITH_GLYCINE	1	1	6	0.0459995	0.234535	0.629792	ACSM2B
REACTOME_FGFR2_MUTANT_RECEPTOR_ACTIVATION	4	2	33	0.0453202	0.234535	0.629792	FGFR2:FGF9:FGF1:FGF17
REACTOME_FGFR1B_LIGAND_BINDING_AND_ACTIVATION	1	1	6	0.0459995	0.234535	0.629792	FGF1
REACTOME_PRE_NOTCH_PROCESSING_IN_THE_ENDOPLASMIC_RETICULUM	1	1	6	0.0459995	0.234535	0.629792	NOTCH3
REACTOME_ESTROGEN_BIOSYNTHESIS	1	1	6	0.0459995	0.234535	0.629792	CYP19A1
REACTOME_PEPTIDE_HORMONE_METABOLISM	9	6	90	0.0430711	0.234535	0.629792	PAX6:CPE:ACE2:TCF7L2:CPB1:ACE:ANPEP:MME:GNAT3
REACTOME_SCAVENGING_BY_CLASS_B_RECEPTORS	1	1	6	0.0459995	0.234535	0.629792	APOB
REACTOME_SCAVENGING_BY_CLASS_F_RECEPTORS	1	1	6	0.0459995	0.234535	0.629792	APOB
REACTOME_TNFR1_MEDIATED_CERAMIDE_PRODUCTION	1	1	6	0.0459995	0.234535	0.629792	SMPD3
REACTOME_FRS_MEDIATED_FGFR1_SIGNALING	3	2	23	0.0459624	0.234535	0.629792	FGF9:FGF1:FGF17
REACTOME_MET_RECEPTOR_ACTIVATION	1	1	6	0.0459995	0.234535	0.629792	HGFAC
REACTOME_MITOCHONDRIAL_FATTY_ACID_BETA_OXIDATION_OF_UNSATURATED_FATTY_ACIDS	1	1	6	0.0459995	0.234535	0.629792	ACADL
REACTOME_MET_ACTIVATES_PI3K_AKT_SIGNALING	1	1	6	0.0459995	0.234535	0.629792	GAB1
REACTOME_PLASMA_LIPOPROTEIN_CLEARANCE	4	2	33	0.0453202	0.234535	0.629792	APOB:CUBN:LIPC:AMN
REACTOME_VLDL_CLEARANCE	1	1	6	0.0459995	0.234535	0.629792	APOB
REACTOME_BIOSYNTHESIS_OF_EPA_DERIVED_SPMS	1	1	6	0.0459995	0.234535	0.629792	ALOX5
REACTOME_ACTIVATED_NTRK2_SIGNALS_THROUGH_CDK5	1	1	6	0.0459995	0.234535	0.629792	NTRK2
REACTOME_ACTIVATED_NTRK3_SIGNALS_THROUGH_PI3K	1	1	6	0.0459995	0.234535	0.629792	NTRK3
REACTOME_CS_DS_DEGRADATION	2	1	14	0.0478362	0.238227	0.623009	NCAN:CSPG4
REACTOME_SHC1_EVENTS_IN_EGFR_SIGNALING	2	1	14	0.0478362	0.238227	0.623009	EGF:EGFR
REACTOME_ACETYLCHOLINE_BINDING_AND_DOWNSTREAM_EVENTS	2	1	14	0.0478362	0.238227	0.623009	CHRNA4:CHRNA9
REACTOME_SEMA3A_PLEXIN_REPULSION_SIGNALING_BY_INHIBITING_INTEGRIN_ADHESION	2	1	14	0.0478362	0.238227	0.623009	PLXNA2:PLXNA4
REACTOME_DEFECTS_IN_COBALAMIN_B12_METABOLISM	2	1	14	0.0478362	0.238227	0.623009	CUBN:AMN
REACTOME_LYSOSPHINGOLIPID_AND_LPA_RECEPTORS	2	1	14	0.0478362	0.238227	0.623009	S1PR5:LPAR1
REACTOME_LGI_ADAM_INTERACTIONS	2	1	14	0.0478362	0.238227	0.623009	CACNG8:LGI2
REACTOME_EPH_EPHRIN_SIGNALING	9	6	92	0.0488662	0.242551	0.615196	EPHA3:NGEF:PAK3:MYH14:EPHA7:GRIN1:EPHA10:ARHGEF28:GRIN2B
REACTOME_G_ALPHA_12_13_SIGNALLING_EVENTS	8	5	80	0.049888	0.246806	0.607645	NGEF:ARHGEF10L:ARHGEF16:FGD4:TIAM2:ARHGEF40:GNG4:ADRA1B
REACTOME_NEGATIVE_REGULATION_OF_FGFR2_SIGNALING	4	3	34	0.0506148	0.249578	0.602794	FGFR2:FGF9:FGF1:FGF17
REACTOME_SIGNALING_BY_EGFR_IN_CANCER	3	2	24	0.0526307	0.257706	0.588875	GAB1:EGF:EGFR
REACTOME_GPCR_LIGAND_BINDING	35	28	454	0.0527791	0.257706	0.588875	EDN1:ADCYAP1R1:WNT11:HRH3:NTSR1:BRS3:WNT2:FZD10:GRM6:CRHR1:GRM4:OPN5:WNT2B:C5AR2:ANXA1:WNT9A:RGR:EDNRA:PTH1R:CCR1:GRM2:NPY5R:GNG4:WNT10B:TAS1R3:ADRA1B:FPR1:RXFP1:CYSLTR1:GRM8:S1PR5:MC2R:CCK:C5AR1:LPAR1
REACTOME_RHO_GTPASES_ACTIVATE_NADPH_OXIDASES	3	2	24	0.0526307	0.257706	0.588875	S100A8:S100A9:CYBB
REACTOME_P130CAS_LINKAGE_TO_MAPK_SIGNALING_FOR_INTEGRINS	2	1	15	0.0572075	0.273102	0.563675	VWF:FN1
REACTOME_N_GLYCAN_ANTENNAE_ELONGATION	2	1	15	0.0572075	0.273102	0.563675	ST8SIA6:MGAT4C
REACTOME_SYNTHESIS_OF_BILE_ACIDS_AND_BILE_SALTS_VIA_27_HYDROXYCHOLESTEROL	2	1	15	0.0572075	0.273102	0.563675	CYP27A1:CYP8B1
REACTOME_SYNTHESIS_OF_PROSTAGLANDINS_PG_AND_THROMBOXANES_TX	2	1	15	0.0572075	0.273102	0.563675	PTGDS:CYP8B1
REACTOME_REGULATION_OF_INNATE_IMMUNE_RESPONSES_TO_CYTOSOLIC_DNA	2	1	15	0.0572075	0.273102	0.563675	DTX4:ZBP1
REACTOME_GRB2:SOS_PROVIDES_LINKAGE_TO_MAPK_SIGNALING_FOR_INTEGRINS	2	1	15	0.0572075	0.273102	0.563675	VWF:FN1
REACTOME_TFAP2_AP_2_FAMILY_REGULATES_TRANSCRIPTION_OF_GROWTH_FACTORS_AND_THEIR_RECEPTORS	2	1	15	0.0572075	0.273102	0.563675	TFAP2A:EGFR
REACTOME_IRON_UPTAKE_AND_TRANSPORT	6	4	58	0.057703	0.274593	0.561311	HEPH:TF:ATP6V0A4:ATP6V1B1:FTMT:ATP6V1G2
REACTOME_ARMS_MEDIATED_ACTIVATION	1	1	7	0.0618807	0.277694	0.556433	NTRK1
REACTOME_NRAGE_SIGNALS_DEATH_THROUGH_JNK	6	4	59	0.0622441	0.277694	0.556433	NGEF:ARHGEF10L:ARHGEF16:FGD4:TIAM2:ARHGEF40
REACTOME_INTEGRATION_OF_ENERGY_METABOLISM	10	7	108	0.0593006	0.277694	0.556433	ABCC8:ADCY2:ADCY4:CACNA1C:CACNA1D:PRKAA2:ADCY1:GNG4:ADCY5:CACNA1E
REACTOME_G_PROTEIN_GATED_POTASSIUM_CHANNELS	3	2	25	0.0597955	0.277694	0.556433	KCNJ6:KCNJ9:GNG4
REACTOME_ACYL_CHAIN_REMODELING_OF_DAG_AND_TAG	1	1	7	0.0618807	0.277694	0.556433	DGAT2L6
REACTOME_DIGESTION_OF_DIETARY_LIPID	1	1	7	0.0618807	0.277694	0.556433	PNLIPRP1
REACTOME_SYNTHESIS_OF_12_EICOSATETRAENOIC_ACID_DERIVATIVES	1	1	7	0.0618807	0.277694	0.556433	ALOX12
REACTOME_ZINC_EFFLUX_AND_COMPARTMENTALIZATION_BY_THE_SLC30_FAMILY	1	1	7	0.0618807	0.277694	0.556433	SLC30A1
REACTOME_NRCAM_INTERACTIONS	1	1	7	0.0618807	0.277694	0.556433	CNTN2
REACTOME_NEUROFASCIN_INTERACTIONS	1	1	7	0.0618807	0.277694	0.556433	NFASC
REACTOME_PHASE_1_INACTIVATION_OF_FAST_NAPLUS_CHANNELS	1	1	7	0.0618807	0.277694	0.556433	KCNIP1
REACTOME_METABOLIC_DISORDERS_OF_BIOLOGICAL_OXIDATION_ENZYMES	4	3	36	0.062245	0.277694	0.556433	CYP27A1:CYP19A1:CYP1B1:MC2R
REACTOME_GLI_PROTEINS_BIND_PROMOTERS_OF_HH_RESPONSIVE_GENES_TO_PROMOTE_TRANSCRIPTION	1	1	7	0.0618807	0.277694	0.556433	GLI2
REACTOME_FRUCTOSE_METABOLISM	1	1	7	0.0618807	0.277694	0.556433	ALDH1A1
REACTOME_HIGHLY_SODIUM_PERMEABLE_ACETYLCHOLINE_NICOTINIC_RECEPTORS	1	1	7	0.0618807	0.277694	0.556433	CHRNA4
REACTOME_GLYCEROPHOSPHOLIPID_CATABOLISM	1	1	7	0.0618807	0.277694	0.556433	PNPLA7
REACTOME_ARYL_HYDROCARBON_RECEPTOR_SIGNALLING	1	1	7	0.0618807	0.277694	0.556433	ARNT2
REACTOME_RUNX1_REGULATES_TRANSCRIPTION_OF_GENES_INVOLVED_IN_DIFFERENTIATION_OF_MYELOID_CELLS	1	1	7	0.0618807	0.277694	0.556433	LGALS3
REACTOME_SIGNALING_BY_NTRK2_TRKB	3	2	25	0.0597955	0.277694	0.556433	GAB1:NTRK2:GRIN2B
REACTOME_NOTCH3_ACTIVATION_AND_TRANSMISSION_OF_SIGNAL_TO_THE_NUCLEUS	3	2	25	0.0597955	0.277694	0.556433	NOTCH3:EGF:EGFR
REACTOME_STAT5_ACTIVATION	1	1	7	0.0618807	0.277694	0.556433	FLT3
REACTOME_DISORDERS_OF_TRANSMEMBRANE_TRANSPORTERS	15	11	177	0.0665716	0.296115	0.528539	ABCB4:ABCC8:ABCC9:SLC12A1:SLC4A4:HEPH:SLC5A1:SLC2A9:SLC12A6:SLC5A2:SLC6A20:ABCA1:SLC2A10:SLC34A3:SLC6A14
REACTOME_INSULIN_RECEPTOR_RECYCLING	3	2	26	0.06745	0.297375	0.526695	ATP6V0A4:ATP6V1B1:ATP6V1G2
REACTOME_METAL_ION_SLC_TRANSPORTERS	3	2	26	0.06745	0.297375	0.526695	SLC11A1:HEPH:SLC30A1
REACTOME_REGULATION_OF_GENE_EXPRESSION_IN_LATE_STAGE_BRANCHING_MORPHOGENESIS_PANCREATIC_BUD_PRECURSOR_CELLS	2	1	16	0.0673729	0.297375	0.526695	MAML2:ONECUT3
REACTOME_BINDING_AND_UPTAKE_OF_LIGANDS_BY_SCAVENGER_RECEPTORS	9	6	98	0.0692989	0.30463	0.516227	STAB1:MSR1:APOB:COL1A1:COL1A2:CD163:COL4A1:IGLV3-21:HBB
REACTOME_SIGNALING_BY_ERBB2	5	3	49	0.071734	0.314413	0.502499	ERBB3:GAB1:EGF:EGFR:ERBB4
REACTOME_SIGNALING_BY_NTRKS	9	6	99	0.0731611	0.319733	0.495212	ADCYAP1R1:MEF2C:GAB1:NTRK3:NTRK2:PTPRO:RIT2:NTRK1:GRIN2B
REACTOME_VEGF_LIGAND_RECEPTOR_INTERACTIONS	1	1	8	0.0792981	0.323891	0.489602	KDR
REACTOME_PLATELET_SENSITIZATION_BY_LDL	2	2	17	0.0782948	0.323891	0.489602	FGR:APOB
REACTOME_SMAC_XIAP_REGULATED_APOPTOTIC_RESPONSE	1	1	8	0.0792981	0.323891	0.489602	2022-09-04
REACTOME_CROSS_PRESENTATION_OF_PARTICULATE_EXOGENOUS_ANTIGENS_PHAGOSOMES	1	1	8	0.0792981	0.323891	0.489602	CYBB
REACTOME_AMPK_INHIBITS_CHREBP_TRANSCRIPTIONAL_ACTIVATION_ACTIVITY	1	1	8	0.0792981	0.323891	0.489602	PRKAA2
REACTOME_SYNTHESIS_OF_EPOXY_EET_AND_DIHYDROXYEICOSATRIENOIC_ACIDS_DHET	1	1	8	0.0792981	0.323891	0.489602	CYP1B1
REACTOME_NETRIN_1_SIGNALING	5	4	50	0.0775896	0.323891	0.489602	UNC5A:SLIT2:DSCAML1:UNC5C:SLIT3
REACTOME_INACTIVATION_OF_CDC42_AND_RAC1	1	1	8	0.0792981	0.323891	0.489602	SLIT2
REACTOME_ROLE_OF_ABL_IN_ROBO_SLIT_SIGNALING	1	1	8	0.0792981	0.323891	0.489602	SLIT2
REACTOME_BINDING_OF_TCF_LEF:CTNNB1_TO_TARGET_GENE_PROMOTERS	1	1	8	0.0792981	0.323891	0.489602	TCF7L2
REACTOME_RELAXIN_RECEPTORS	1	1	8	0.0792981	0.323891	0.489602	RXFP1
REACTOME_REGULATION_OF_CYTOSKELETAL_REMODELING_AND_CELL_SPREADING_BY_IPP_COMPLEX_COMPONENTS	1	1	8	0.0792981	0.323891	0.489602	PARVA
REACTOME_VEGFR2_MEDIATED_VASCULAR_PERMEABILITY	3	2	27	0.075585	0.323891	0.489602	PAK3:JUP:CDH5
REACTOME_RELEASE_OF_HH_NP_FROM_THE_SECRETING_CELL	1	1	8	0.0792981	0.323891	0.489602	SCUBE2
REACTOME_PHASE_3_RAPID_REPOLARISATION	1	1	8	0.0792981	0.323891	0.489602	KCNH2
REACTOME_SIGNALING_BY_FGFR1_IN_DISEASE	4	3	38	0.0752562	0.323891	0.489602	FGF9:GAB1:FGF1:FGF17
REACTOME_MRNA_EDITING:_C_TO_U_CONVERSION	1	1	8	0.0792981	0.323891	0.489602	A1CF
REACTOME_RUNX3_REGULATES_WNT_SIGNALING	1	1	8	0.0792981	0.323891	0.489602	TCF7L2
REACTOME_HDL_ASSEMBLY	1	1	8	0.0792981	0.323891	0.489602	ABCA1
REACTOME_INTERLEUKIN_18_SIGNALING	1	1	8	0.0792981	0.323891	0.489602	ALOX5
REACTOME_NONCANONICAL_ACTIVATION_OF_NOTCH3	1	1	8	0.0792981	0.323891	0.489602	NOTCH3
REACTOME_BIOSYNTHESIS_OF_MARESINS	1	1	8	0.0792981	0.323891	0.489602	ALOX5
REACTOME_SIGNALING_BY_NTRK3_TRKC	2	2	17	0.0782948	0.323891	0.489602	NTRK3:PTPRO
REACTOME_ACTIVATED_NTRK3_SIGNALS_THROUGH_RAS	1	1	8	0.0792981	0.323891	0.489602	NTRK3
REACTOME_SIGNALING_BY_FGFR_IN_DISEASE	6	4	63	0.0825312	0.335269	0.474606	FGFR2:FGFR3:FGF9:GAB1:FGF1:FGF17
REACTOME_TRANSCRIPTIONAL_REGULATION_BY_MECP2	6	4	63	0.0825312	0.335269	0.474606	RBFOX1:MEF2C:GRIA2:PPARG:MOBP:GRIN2B
REACTOME_NOTCH_HLH_TRANSCRIPTION_PATHWAY	3	2	28	0.0841889	0.338336	0.470652	HDAC9:NOTCH3:MAML2
REACTOME_TRP_CHANNELS	3	2	28	0.0841889	0.338336	0.470652	TRPM5:TRPM3:TRPV6
REACTOME_MICROAUTOPHAGY	3	2	28	0.0841889	0.338336	0.470652	PRKAG3:PRKAA2:HBB
REACTOME_ACTIVATION_OF_AMPK_DOWNSTREAM_OF_NMDARS	3	2	28	0.0841889	0.338336	0.470652	PRKAG3:PRKAA2:TUBB8
REACTOME_PRE_NOTCH_PROCESSING_IN_GOLGI	2	2	18	0.0899314	0.355692	0.448926	ST3GAL6:NOTCH3
REACTOME_NOREPINEPHRINE_NEUROTRANSMITTER_RELEASE_CYCLE	2	2	18	0.0899314	0.355692	0.448926	RIMS1:SLC22A2
REACTOME_ABC_TRANSPORTERS_IN_LIPID_HOMEOSTASIS	2	2	18	0.0899314	0.355692	0.448926	ABCA6:ABCA10
REACTOME_SEROTONIN_NEUROTRANSMITTER_RELEASE_CYCLE	2	2	18	0.0899314	0.355692	0.448926	RIMS1:SYN3
REACTOME_MAP2K_AND_MAPK_ACTIVATION	4	3	40	0.0896224	0.355692	0.448926	VWF:FN1:IL17RD:KSR2
REACTOME_MECP2_REGULATES_NEURONAL_RECEPTORS_AND_CHANNELS	2	2	18	0.0899314	0.355692	0.448926	GRIA2:GRIN2B
REACTOME_CYTOCHROME_P450_ARRANGED_BY_SUBSTRATE_TYPE	6	4	65	0.093944	0.370584	0.431113	CYP46A1:CYP27A1:CYP19A1:CYP1B1:ARNT2:CYP8B1
REACTOME_PI3K_AKT_ACTIVATION	1	1	9	0.0980105	0.371005	0.430621	NTRK1
REACTOME_NUCLEAR_RECEPTOR_TRANSCRIPTION_PATHWAY	5	4	53	0.0967155	0.371005	0.430621	HNF4A:NR5A2:PPARG:THRB:RORB
REACTOME_BH3_ONLY_PROTEINS_ASSOCIATE_WITH_AND_INACTIVATE_ANTI_APOPTOTIC_BCL_2_MEMBERS	1	1	9	0.0980105	0.371005	0.430621	BMF
REACTOME_ERYTHROCYTES_TAKE_UP_OXYGEN_AND_RELEASE_CARBON_DIOXIDE	1	1	9	0.0980105	0.371005	0.430621	HBB
REACTOME_DOWNREGULATION_OF_ERBB4_SIGNALING	1	1	9	0.0980105	0.371005	0.430621	ERBB4
REACTOME_SPERM_MOTILITY_AND_TAXES	1	1	9	0.0980105	0.371005	0.430621	CATSPERD
REACTOME_ACTIVATION_OF_PUMA_AND_TRANSLOCATION_TO_MITOCHONDRIA	1	1	9	0.0980105	0.371005	0.430621	TP63
REACTOME_SYNTHESIS_OF_5_EICOSATETRAENOIC_ACIDS	1	1	9	0.0980105	0.371005	0.430621	ALOX5
REACTOME_SYNTHESIS_OF_16_20_HYDROXYEICOSATETRAENOIC_ACIDS_HETE	1	1	9	0.0980105	0.371005	0.430621	CYP1B1
REACTOME_EGFR_TRANSACTIVATION_BY_GASTRIN	1	1	9	0.0980105	0.371005	0.430621	EGFR
REACTOME_TRIF_MEDIATED_PROGRAMMED_CELL_DEATH	1	1	9	0.0980105	0.371005	0.430621	TLR4
REACTOME_ADRENOCEPTORS	1	1	9	0.0980105	0.371005	0.430621	ADRA1B
REACTOME_MULTIFUNCTIONAL_ANION_EXCHANGERS	1	1	9	0.0980105	0.371005	0.430621	SLC5A12
REACTOME_SIGNALING_BY_FGFR4	4	3	41	0.0973004	0.371005	0.430621	FGF9:GAB1:FGF1:FGF17
REACTOME_HIGHLY_CALCIUM_PERMEABLE_NICOTINIC_ACETYLCHOLINE_RECEPTORS	1	1	9	0.0980105	0.371005	0.430621	CHRNA4
REACTOME_ACTIVATED_NTRK2_SIGNALS_THROUGH_RAS	1	1	9	0.0980105	0.371005	0.430621	NTRK2
REACTOME_FOXO_MEDIATED_TRANSCRIPTION	6	4	66	0.0999635	0.377444	0.423147	PPARGC1A:PCK1:BTG1:ABCA6:TRIM63:PLXNA4
REACTOME_PLATELET_ACTIVATION_SIGNALING_AND_AGGREGATION	20	16	260	0.102143	0.380286	0.41989	RAB27B:TF:TGFB2:COL1A1:VWF:FN1:PLEK:MPL:DGKB:MMRN1:EGF:LHFPL2:DGKI:COL1A2:GNG4:PCDH7:SELP:GAS6:SERPINA1:GNAT3
REACTOME_AFLATOXIN_ACTIVATION_AND_DETOXIFICATION	2	2	19	0.102238	0.380286	0.41989	MGST1:DPEP3
REACTOME_PHASE_4_RESTING_MEMBRANE_POTENTIAL	2	2	19	0.102238	0.380286	0.41989	KCNK10:KCNK9
REACTOME_SIGNALING_BY_FGFR2_IIIA_TM	2	2	19	0.102238	0.380286	0.41989	FGFR2:FGF1
REACTOME_PLASMA_LIPOPROTEIN_ASSEMBLY	2	2	19	0.102238	0.380286	0.41989	APOB:ABCA1
REACTOME_BIOSYNTHESIS_OF_SPECIALIZED_PRORESOLVING_MEDIATORS_SPMS	2	2	19	0.102238	0.380286	0.41989	ALOX5:ALOX12
REACTOME_SUMOYLATION_OF_INTRACELLULAR_RECEPTORS	3	2	30	0.102748	0.381237	0.418805	NR5A2:PPARG:THRB
REACTOME_SIGNALING_BY_NON_RECEPTOR_TYROSINE_KINASES	5	4	54	0.103601	0.383452	0.41629	ERBB3:EGF:EGFR:ERBB4:LRRK2
REACTOME_CARBOXYTERMINAL_POST_TRANSLATIONAL_MODIFICATIONS_OF_TUBULIN	4	3	42	0.105299	0.388778	0.410299	TTLL7:TTLL6:AGBL4:TUBB8
REACTOME_TRANSCRIPTIONAL_REGULATION_BY_RUNX2	10	8	120	0.106176	0.391052	0.407765	GLI2:COL1A1:PPARGC1A:LGALS3:HEY2:SMAD6:SMAD1:MAF:ZNF521:TWIST2
REACTOME_HEPARAN_SULFATE_HEPARIN_HS_GAG_METABOLISM	5	4	55	0.110735	0.406843	0.390573	HS3ST1:B3GAT1:NCAN:HSPG2:CSPG4
REACTOME_BILE_ACID_AND_BILE_SALT_METABOLISM	4	3	43	0.113611	0.409703	0.38753	CYP46A1:ABCC3:CYP27A1:CYP8B1
REACTOME_TETRAHYDROBIOPTERIN_BH4_SYNTHESIS_RECYCLING_SALVAGE_AND_REGULATION	1	1	10	0.1178	0.409703	0.38753	PRKG2
REACTOME_PI3K_EVENTS_IN_ERBB4_SIGNALING	1	1	10	0.1178	0.409703	0.38753	ERBB4
REACTOME_CHONDROITIN_SULFATE_BIOSYNTHESIS	2	2	20	0.115169	0.409703	0.38753	NCAN:CSPG4
REACTOME_VOLTAGE_GATED_POTASSIUM_CHANNELS	4	3	43	0.113611	0.409703	0.38753	KCNH2:KCNQ2:KCNA7:KCNC1
REACTOME_NEUROTRANSMITTER_CLEARANCE	1	1	10	0.1178	0.409703	0.38753	SLC22A2
REACTOME_REMOVAL_OF_AMINOTERMINAL_PROPEPTIDES_FROM_GAMMA_CARBOXYLATED_PROTEINS	1	1	10	0.1178	0.409703	0.38753	GAS6
REACTOME_FRS2_MEDIATED_ACTIVATION	1	1	10	0.1178	0.409703	0.38753	NTRK1
REACTOME_FGFR1_MUTANT_RECEPTOR_ACTIVATION	3	2	31	0.112672	0.409703	0.38753	FGF9:FGF1:FGF17
REACTOME_P75NTR_REGULATES_AXONOGENESIS	1	1	10	0.1178	0.409703	0.38753	LINGO1
REACTOME_CASPASE_ACTIVATION_VIA_DEPENDENCE_RECEPTORS_IN_THE_ABSENCE_OF_LIGAND	1	1	10	0.1178	0.409703	0.38753	UNC5A
REACTOME_BICARBONATE_TRANSPORTERS	1	1	10	0.1178	0.409703	0.38753	SLC4A4
REACTOME_ACTIVATION_OF_THE_AP_1_FAMILY_OF_TRANSCRIPTION_FACTORS	1	1	10	0.1178	0.409703	0.38753	JUN
REACTOME_ORGANIC_CATION_TRANSPORT	1	1	10	0.1178	0.409703	0.38753	SLC22A2
REACTOME_NEGATIVE_REGULATION_OF_FGFR4_SIGNALING	3	2	31	0.112672	0.409703	0.38753	FGF9:FGF1:FGF17
REACTOME_TP53_REGULATES_TRANSCRIPTION_OF_GENES_INVOLVED_IN_CYTOCHROME_C_RELEASE	2	2	20	0.115169	0.409703	0.38753	TP63:TP53INP1
REACTOME_MRNA_EDITING	1	1	10	0.1178	0.409703	0.38753	A1CF
REACTOME_NEGATIVE_REGULATION_OF_ACTIVITY_OF_TFAP2_AP_2_FAMILY_TRANSCRIPTION_FACTORS	1	1	10	0.1178	0.409703	0.38753	TFAP2A
REACTOME_MET_RECEPTOR_RECYCLING	1	1	10	0.1178	0.409703	0.38753	GAB1
REACTOME_RUNX3_REGULATES_P14_ARF	1	1	10	0.1178	0.409703	0.38753	CDKN2A
REACTOME_CHYLOMICRON_ASSEMBLY	1	1	10	0.1178	0.409703	0.38753	APOB
REACTOME_CHYLOMICRON_REMODELING	1	1	10	0.1178	0.409703	0.38753	APOB
REACTOME_NOTCH4_INTRACELLULAR_DOMAIN_REGULATES_TRANSCRIPTION	2	2	20	0.115169	0.409703	0.38753	HEY2:MAML2
REACTOME_TP53_REGULATES_TRANSCRIPTION_OF_CELL_DEATH_GENES	4	3	44	0.122227	0.424116	0.372516	TP63:NLRC4:IGFBP3:TP53INP1
REACTOME_REGULATION_OF_GENE_EXPRESSION_IN_BETA_CELLS	2	2	21	0.128676	0.437381	0.359141	PAX6:HNF4A
REACTOME_SIGNAL_TRANSDUCTION_BY_L1	2	2	21	0.128676	0.437381	0.359141	EGFR:NCAM1
REACTOME_ZBP1_DAI_MEDIATED_INDUCTION_OF_TYPE_I_IFNS	2	2	21	0.128676	0.437381	0.359141	DTX4:ZBP1
REACTOME_COBALAMIN_CBL_VITAMIN_B12_TRANSPORT_AND_METABOLISM	2	2	21	0.128676	0.437381	0.359141	CUBN:AMN
REACTOME_SYNTHESIS_OF_LEUKOTRIENES_LT_AND_EOXINS_EX	2	2	21	0.128676	0.437381	0.359141	ALOX5:DPEP3
REACTOME_PRESYNAPTIC_FUNCTION_OF_KAINATE_RECEPTORS	2	2	21	0.128676	0.437381	0.359141	GRIK3:GNG4
REACTOME_VXPX_CARGO_TARGETING_TO_CILIUM	2	2	21	0.128676	0.437381	0.359141	CNGB1:CNGA2
REACTOME_ANTIMICROBIAL_PEPTIDES	8	6	97	0.12796	0.437381	0.359141	LTF:SLC11A1:LYZ:BPI:S100A8:S100A9:BPIFB6:DEFB119
REACTOME_INTERLEUKIN_37_SIGNALING	2	2	21	0.128676	0.437381	0.359141	PTPN5:PTPN13
REACTOME_INTERLEUKIN_4_AND_INTERLEUKIN_13_SIGNALING	9	7	111	0.12984	0.440341	0.356211	ALOX5:VIM:CCL2:FN1:LAMA5:IL13RA1:ANXA1:COL1A2:IL12A
REACTOME_RHO_GTPASE_CYCLE	11	9	139	0.130803	0.442604	0.353985	ARHGAP6:NGEF:ARHGEF10L:ARHGAP28:ARHGAP22:ARHGEF16:ARHGAP29:ARHGAP24:FGD4:TIAM2:ARHGEF40
REACTOME_SIGNALING_BY_ERBB4	5	4	58	0.133579	0.448408	0.348327	ERBB3:EGF:EGFR:GABRB3:ERBB4
REACTOME_AMINO_ACID_TRANSPORT_ACROSS_THE_PLASMA_MEMBRANE	3	2	33	0.133715	0.448408	0.348327	SLC6A20:SLC43A2:SLC6A14
REACTOME_SIALIC_ACID_METABOLISM	3	2	33	0.133715	0.448408	0.348327	ST3GAL6:ST6GALNAC1:ST8SIA6
REACTOME_NEGATIVE_REGULATION_OF_FGFR1_SIGNALING	3	2	33	0.133715	0.448408	0.348327	FGF9:FGF1:FGF17
REACTOME_GAMMA_CARBOXYLATION_TRANSPORT_AND_AMINO_TERMINAL_CLEAVAGE_OF_PROTEINS	1	1	11	0.13847	0.451232	0.345601	GAS6
REACTOME_SYNTHESIS_OF_PIPS_AT_THE_LATE_ENDOSOME_MEMBRANE	1	1	11	0.13847	0.451232	0.345601	MTMR7
REACTOME_DSCAM_INTERACTIONS	1	1	11	0.13847	0.451232	0.345601	DSCAML1
REACTOME_REGULATION_OF_GENE_EXPRESSION_BY_HYPOXIA_INDUCIBLE_FACTOR	1	1	11	0.13847	0.451232	0.345601	HIF3A
REACTOME_REGULATION_OF_SIGNALING_BY_NODAL	1	1	11	0.13847	0.451232	0.345601	TDGF1
REACTOME_INTERACTION_WITH_CUMULUS_CELLS_AND_THE_ZONA_PELLUCIDA	1	1	11	0.13847	0.451232	0.345601	SPAM1
REACTOME_BETA_OXIDATION_OF_VERY_LONG_CHAIN_FATTY_ACIDS	1	1	11	0.13847	0.451232	0.345601	ACOT6
REACTOME_UPTAKE_AND_FUNCTION_OF_ANTHRAX_TOXINS	1	1	11	0.13847	0.451232	0.345601	ANTXR2
REACTOME_IRAK4_DEFICIENCY_TLR2_4	1	1	11	0.13847	0.451232	0.345601	TLR4
REACTOME_SIGNALING_BY_FGFR4_IN_DISEASE	1	1	11	0.13847	0.451232	0.345601	GAB1
REACTOME_MITOCHONDRIAL_FATTY_ACID_BETA_OXIDATION_OF_SATURATED_FATTY_ACIDS	1	1	11	0.13847	0.451232	0.345601	ACADL
REACTOME_MET_ACTIVATES_RAP1_AND_RAC1	1	1	11	0.13847	0.451232	0.345601	GAB1
REACTOME_ACTIVATED_NTRK2_SIGNALS_THROUGH_FRS2_AND_FRS3	1	1	11	0.13847	0.451232	0.345601	NTRK2
REACTOME_DEFECTS_IN_VITAMIN_AND_COFACTOR_METABOLISM	2	2	22	0.142709	0.462034	0.335327	CUBN:AMN
REACTOME_ADP_SIGNALLING_THROUGH_P2Y_PURINOCEPTOR_12	2	2	22	0.142709	0.462034	0.335327	GNG4:GNAT3
REACTOME_RA_BIOSYNTHESIS_PATHWAY	2	2	22	0.142709	0.462034	0.335327	ALDH1A1:CRABP1
REACTOME_SYNTHESIS_OF_BILE_ACIDS_AND_BILE_SALTS	3	3	34	0.144795	0.465767	0.331832	CYP46A1:CYP27A1:CYP8B1
REACTOME_GLUCONEOGENESIS	3	3	34	0.144795	0.465767	0.331832	PCK1:SLC37A2:PGK2
REACTOME_THE_PHOTOTRANSDUCTION_CASCADE	3	3	34	0.144795	0.465767	0.331832	CNGB1:GRK7:SAG
REACTOME_PYRIMIDINE_CATABOLISM	1	1	12	0.159844	0.499178	0.301744	UPB1
REACTOME_GAP_JUNCTION_DEGRADATION	1	1	12	0.159844	0.499178	0.301744	DAB2
REACTOME_PROLONGED_ERK_ACTIVATION_EVENTS	1	1	12	0.159844	0.499178	0.301744	NTRK1
REACTOME_ETHANOL_OXIDATION	1	1	12	0.159844	0.499178	0.301744	ALDH1A1
REACTOME_EICOSANOIDS	1	1	12	0.159844	0.499178	0.301744	CYP8B1
REACTOME_DOWNREGULATION_OF_SMAD2_3:SMAD4_TRANSCRIPTIONAL_ACTIVITY	2	2	23	0.157222	0.499178	0.301744	SKIL:TGIF1
REACTOME_NOTCH2_INTRACELLULAR_DOMAIN_REGULATES_TRANSCRIPTION	1	1	12	0.159844	0.499178	0.301744	MAML2
REACTOME_CREB1_PHOSPHORYLATION_THROUGH_THE_ACTIVATION_OF_ADENYLATE_CYCLASE	1	1	12	0.159844	0.499178	0.301744	ADCY1
REACTOME_PHYSIOLOGICAL_FACTORS	1	1	12	0.159844	0.499178	0.301744	NPPA
REACTOME_TRANSPORT_OF_NUCLEOSIDES_AND_FREE_PURINE_AND_PYRIMIDINE_BASES_ACROSS_THE_PLASMA_MEMBRANE	1	1	12	0.159844	0.499178	0.301744	SLC28A1
REACTOME_BUTYROPHILIN_BTN_FAMILY_INTERACTIONS	1	1	12	0.159844	0.499178	0.301744	BTNL9
REACTOME_ACTIVATION_OF_THE_TFAP2_AP_2_FAMILY_OF_TRANSCRIPTION_FACTORS	1	1	12	0.159844	0.499178	0.301744	TFAP2A
REACTOME_INTERLEUKIN_35_SIGNALLING	1	1	12	0.159844	0.499178	0.301744	IL12A
REACTOME_ERYTHROPOIETIN_ACTIVATES_PHOSPHOINOSITIDE_3_KINASE_PI3K	1	1	12	0.159844	0.499178	0.301744	GAB1
REACTOME_CLATHRIN_MEDIATED_ENDOCYTOSIS	11	9	145	0.162064	0.505059	0.296657	SNAP91:LRP2:APOB:TF:SGIP1:EGF:SYT2:EGFR:DAB2:REPS2:SYT9
REACTOME_ABC_FAMILY_PROTEINS_MEDIATED_TRANSPORT	8	7	103	0.16562	0.515073	0.288132	ABCB4:ABCC9:ABCB1:ABCC3:ABCA8:ABCA6:ABCA10:ABCA4
REACTOME_O_LINKED_GLYCOSYLATION_OF_MUCINS	5	4	62	0.16717	0.518814	0.284988	MUC5B:MUCL1:GALNTL6:MUC16:MUC5AC
REACTOME_CELL_DEATH_SIGNALLING_VIA_NRAGE_NRIF_AND_NADE	6	5	76	0.170937	0.529409	0.276209	NGEF:ARHGEF10L:ARHGEF16:FGD4:TIAM2:ARHGEF40
REACTOME_SYNTHESIS_OF_BILE_ACIDS_AND_BILE_SALTS_VIA_7ALPHA_HYDROXYCHOLESTEROL	2	2	24	0.172163	0.529923	0.275787	CYP27A1:CYP8B1
REACTOME_DARPP_32_EVENTS	2	2	24	0.172163	0.529923	0.275787	PPP1R1B:PDE4B
REACTOME_ESTROGEN_DEPENDENT_NUCLEAR_EVENTS_DOWNSTREAM_OF_ESR_MEMBRANE_SIGNALING	2	2	24	0.172163	0.529923	0.275787	EGF:EGFR
REACTOME_CHONDROITIN_SULFATE_DERMATAN_SULFATE_METABOLISM	4	4	50	0.179712	0.543835	0.264533	B3GAT1:NCAN:HSPG2:CSPG4
REACTOME_MITOCHONDRIAL_FATTY_ACID_BETA_OXIDATION	3	3	37	0.180013	0.543835	0.264533	ACADL:ACOT12:THEM5
REACTOME_PASSIVE_TRANSPORT_BY_AQUAPORINS	1	1	13	0.181762	0.543835	0.264533	AQP9
REACTOME_CYTOKINE_SIGNALING_IN_IMMUNE_SYSTEM	57	52	856	0.180595	0.543835	0.264533	ALOX5:IL20RA:VIM:LRRC7:ERBB3:FGFR2:FGFR3:SPTB:MEF2C:FGF9:CCL2:GAB1:PTPN5:VWF:PRLR:FGF1:CD86:FN1:IL1R1:IL1RL2:IL1RL1:GBP3:CSF3R:FLT3:LAMA5:IL13RA1:ANXA1:IL36A:IL36RN:TRIM29:SPTBN5:EGF:IL19:IL17RD:EGFR:NCAM1:DLG2:GFRA1:FGF17:SPTBN4:S100A12:SPTA1:PTPN13:CCR1:COL1A2:RET:NOD2:GFRA2:IL12A:FPR1:KSR2:GRIN1:JUN:ERBB4:CSF1R:DUSP8:GRIN2B
REACTOME_DOWNREGULATION_OF_ERBB2:ERBB3_SIGNALING	1	1	13	0.181762	0.543835	0.264533	ERBB3
REACTOME_O2_CO2_EXCHANGE_IN_ERYTHROCYTES	1	1	13	0.181762	0.543835	0.264533	HBB
REACTOME_PHASE_I_FUNCTIONALIZATION_OF_COMPOUNDS	8	7	105	0.179227	0.543835	0.264533	CYP46A1:AADAC:CYP27A1:CYP19A1:CYP1B1:ALDH1A1:ARNT2:CYP8B1
REACTOME_POU5F1_OCT4_SOX2_NANOG_ACTIVATE_GENES_RELATED_TO_PROLIFERATION	1	1	13	0.181762	0.543835	0.264533	TDGF1
REACTOME_IRF3_MEDIATED_INDUCTION_OF_TYPE_I_IFN	1	1	13	0.181762	0.543835	0.264533	DTX4
REACTOME_REGULATION_OF_LIPID_METABOLISM_BY_PEROXISOME_PROLIFERATOR_ACTIVATED_RECEPTOR_ALPHA_PPARALPHA	9	8	119	0.177767	0.543835	0.264533	ABCB4:ME1:PPARGC1A:HELZ2:PPARG:GLIPR1:TIAM2:ABCA1:ARNT2
REACTOME_SYNTHESIS_SECRETION_AND_INACTIVATION_OF_GLUCOSE_DEPENDENT_INSULINOTROPIC_POLYPEPTIDE_GIP	1	1	13	0.181762	0.543835	0.264533	PAX6
REACTOME_SIGNALING_BY_FGFR1	4	4	50	0.179712	0.543835	0.264533	FGF9:GAB1:FGF1:FGF17
REACTOME_FGFRL1_MODULATION_OF_FGFR1_SIGNALING	1	1	13	0.181762	0.543835	0.264533	FGF17
REACTOME_FATTY_ACID_METABOLISM	13	11	177	0.17796	0.543835	0.264533	ALOX5:ACSBG1:PTGDS:ALOX12:ACADL:CYP1B1:DPEP3:PRKAA2:FAAH2:ACOT12:CYP8B1:THEM5:ACOT6
REACTOME_REGULATION_OF_INSULIN_SECRETION	6	5	78	0.18726	0.559169	0.252457	ABCC8:CACNA1C:CACNA1D:GNG4:ADCY5:CACNA1E
REACTOME_SHC1_EVENTS_IN_ERBB4_SIGNALING	1	1	14	0.204083	0.591723	0.227882	ERBB4
REACTOME_RETROGRADE_NEUROTROPHIN_SIGNALLING	1	1	14	0.204083	0.591723	0.227882	NTRK1
REACTOME_N_GLYCAN_ANTENNAE_ELONGATION_IN_THE_MEDIAL_TRANS_GOLGI	2	2	26	0.203143	0.591723	0.227882	ST8SIA6:MGAT4C
REACTOME_FERTILIZATION	2	2	26	0.203143	0.591723	0.227882	SPAM1:CATSPERD
REACTOME_DEGRADATION_OF_CYSTEINE_AND_HOMOCYSTEINE	1	1	14	0.204083	0.591723	0.227882	GADL1
REACTOME_SYNTHESIS_OF_IP2_IP_AND_INS_IN_THE_CYTOSOL	1	1	14	0.204083	0.591723	0.227882	MTMR7
REACTOME_SYNTHESIS_OF_IP3_AND_IP4_IN_THE_CYTOSOL	2	2	26	0.203143	0.591723	0.227882	PLCE1:PLCH2
REACTOME_IMPORT_OF_PALMITOYL_COA_INTO_THE_MITOCHONDRIAL_MATRIX	1	1	14	0.204083	0.591723	0.227882	PRKAA2
REACTOME_DEFECTIVE_EXT2_CAUSES_EXOSTOSES_2	1	1	14	0.204083	0.591723	0.227882	HSPG2
REACTOME_REPRESSION_OF_WNT_TARGET_GENES	1	1	14	0.204083	0.591723	0.227882	TCF7L2
REACTOME_CASPASE_ACTIVATION_VIA_EXTRINSIC_APOPTOTIC_SIGNALLING_PATHWAY	2	2	26	0.203143	0.591723	0.227882	UNC5A:TLR4
REACTOME_TP53_REGULATES_TRANSCRIPTION_OF_SEVERAL_ADDITIONAL_CELL_DEATH_GENES_WHOSE_SPECIFIC_ROLES_IN_P53_DEPENDENT_APOPTOSIS_REMAIN_UNCERTAIN	1	1	14	0.204083	0.591723	0.227882	TP63
REACTOME_REGULATION_OF_TP53_ACTIVITY_THROUGH_ASSOCIATION_WITH_CO_FACTORS	1	1	14	0.204083	0.591723	0.227882	TP63
REACTOME_INTERLEUKIN_20_FAMILY_SIGNALING	2	2	26	0.203143	0.591723	0.227882	IL20RA:IL19
REACTOME_RUNX3_REGULATES_NOTCH_SIGNALING	1	1	14	0.204083	0.591723	0.227882	MAML2
REACTOME_INTERLEUKIN_1_FAMILY_SIGNALING	10	9	139	0.213707	0.618431	0.208708	ALOX5:PTPN5:IL1R1:IL1RL2:IL1RL1:IL36A:IL36RN:S100A12:PTPN13:NOD2
REACTOME_EFFECTS_OF_PIP2_HYDROLYSIS	2	2	27	0.219088	0.631562	0.199584	DGKB:DGKI
REACTOME_INTEGRIN_SIGNALING	2	2	27	0.219088	0.631562	0.199584	VWF:FN1
REACTOME_GLYCOGEN_BREAKDOWN_GLYCOGENOLYSIS	1	1	15	0.226679	0.645745	0.189939	PYGM
REACTOME_PROLACTIN_RECEPTOR_SIGNALING	1	1	15	0.226679	0.645745	0.189939	PRLR
REACTOME_YAP1_AND_WWTR1_TAZ_STIMULATED_GENE_EXPRESSION	1	1	15	0.226679	0.645745	0.189939	NPPA
REACTOME_P75_NTR_RECEPTOR_MEDIATED_SIGNALLING	7	6	97	0.227023	0.645745	0.189939	NGEF:ARHGEF10L:ARHGEF16:FGD4:TIAM2:ARHGEF40:LINGO1
REACTOME_EICOSANOID_LIGAND_BINDING_RECEPTORS	1	1	15	0.226679	0.645745	0.189939	CYSLTR1
REACTOME_ORGANIC_CATION_ANION_ZWITTERION_TRANSPORT	1	1	15	0.226679	0.645745	0.189939	SLC22A2
REACTOME_NEGATIVE_REGULATION_OF_TCF_DEPENDENT_SIGNALING_BY_WNT_LIGAND_ANTAGONISTS	1	1	15	0.226679	0.645745	0.189939	WNT9A
REACTOME_DISEASES_ASSOCIATED_WITH_GLYCOSAMINOGLYCAN_METABOLISM	3	3	41	0.230745	0.655089	0.1837	NCAN:HSPG2:CSPG4
REACTOME_ION_TRANSPORT_BY_P_TYPE_ATPASES	4	4	55	0.233851	0.66265	0.178716	ATP9A:ATP2B3:ATP8B4:ATP2B2
REACTOME_KERATAN_SULFATE_BIOSYNTHESIS	2	2	28	0.235275	0.662928	0.178534	ST3GAL6:CHST1
REACTOME_G_PROTEIN_ACTIVATION	2	2	28	0.235275	0.662928	0.178534	GNG4:GNAT3
REACTOME_ENERGY_DEPENDENT_REGULATION_OF_MTOR_BY_LKB1_AMPK	2	2	28	0.235275	0.662928	0.178534	PRKAG3:PRKAA2
REACTOME_PEPTIDE_LIGAND_BINDING_RECEPTORS	13	12	188	0.24005	0.675112	0.170624	EDN1:NTSR1:BRS3:C5AR2:ANXA1:EDNRA:CCR1:NPY5R:FPR1:RXFP1:MC2R:CCK:C5AR1
REACTOME_RECYCLING_OF_BILE_ACIDS_AND_SALTS	1	1	16	0.249437	0.675683	0.170257	ABCC3
REACTOME_VITAMIN_B5_PANTOTHENATE_METABOLISM	1	2	17	0.272256	0.675683	0.170257	ENPP2
REACTOME_ACYL_CHAIN_REMODELLING_OF_PI	1	2	17	0.272256	0.675683	0.170257	PLA2R1
REACTOME_HYALURONAN_METABOLISM	1	2	17	0.272256	0.675683	0.170257	HAS1
REACTOME_REGULATION_OF_PYRUVATE_DEHYDROGENASE_PDH_COMPLEX	1	1	16	0.249437	0.675683	0.170257	PDK4
REACTOME_BIOLOGICAL_OXIDATIONS	15	14	221	0.254827	0.675683	0.170257	MGST1:CYP46A1:ACSM2B:AADAC:GSTM5:CYP27A1:CYP19A1:CYP1B1:DPEP3:ALDH1A1:UGT1A6:ARNT2:CYP8B1:ACSM2A:SULT1C2
REACTOME_ACETYLCHOLINE_NEUROTRANSMITTER_RELEASE_CYCLE	1	2	17	0.272256	0.675683	0.170257	RIMS1
REACTOME_ZINC_TRANSPORTERS	1	2	17	0.272256	0.675683	0.170257	SLC30A1
REACTOME_TRANSPORT_OF_VITAMINS_NUCLEOSIDES_AND_RELATED_MOLECULES	3	3	44	0.270827	0.675683	0.170257	SLCO2B1:SLC28A1:SLCO3A1
REACTOME_ACTIVATION_OF_IRF3_IRF7_MEDIATED_BY_TBK1_IKK_EPSILON	1	2	17	0.272256	0.675683	0.170257	TLR4
REACTOME_ACTIVATION_OF_BH3_ONLY_PROTEINS	2	2	30	0.268209	0.675683	0.170257	TP63:BMF
REACTOME_SIGNALING_BY_FGFR	6	6	87	0.267496	0.675683	0.170257	FGFR2:FGFR3:FGF9:GAB1:FGF1:FGF17
REACTOME_ACTIVATION_OF_NOXA_AND_TRANSLOCATION_TO_MITOCHONDRIA	0	1	5	0.266475	0.675683	0.170257
REACTOME_APOPTOTIC_FACTOR_MEDIATED_RESPONSE	1	1	16	0.249437	0.675683	0.170257	2022-09-04
REACTOME_TRANSMISSION_ACROSS_ELECTRICAL_SYNAPSES	0	1	5	0.266475	0.675683	0.170257
REACTOME_DISINHIBITION_OF_SNARE_FORMATION	0	1	5	0.266475	0.675683	0.170257
REACTOME_ACTIVATION_OF_RAS_IN_B_CELLS	0	1	5	0.266475	0.675683	0.170257
REACTOME_CASPASE_ACTIVATION_VIA_DEATH_RECEPTORS_IN_THE_PRESENCE_OF_LIGAND	1	1	16	0.249437	0.675683	0.170257	TLR4
REACTOME_SYNTHESIS_OF_PIPS_AT_THE_ER_MEMBRANE	0	1	5	0.266475	0.675683	0.170257
REACTOME_PKA_MEDIATED_PHOSPHORYLATION_OF_KEY_METABOLIC_FACTORS	0	1	5	0.266475	0.675683	0.170257
REACTOME_MITOCHONDRIAL_UNCOUPLING_PROTEINS	0	1	5	0.266475	0.675683	0.170257
REACTOME_ALTERNATIVE_COMPLEMENT_ACTIVATION	0	1	5	0.266475	0.675683	0.170257
REACTOME_PLASMA_LIPOPROTEIN_ASSEMBLY_REMODELING_AND_CLEARANCE	5	5	71	0.253395	0.675683	0.170257	APOB:CUBN:ABCA1:LIPC:AMN
REACTOME_APOBEC3G_MEDIATED_RESISTANCE_TO_HIV_1_INFECTION	0	1	5	0.266475	0.675683	0.170257
REACTOME_RIP_MEDIATED_NFKB_ACTIVATION_VIA_ZBP1	1	2	17	0.272256	0.675683	0.170257	ZBP1
REACTOME_STING_MEDIATED_INDUCTION_OF_HOST_IMMUNE_RESPONSES	1	1	16	0.249437	0.675683	0.170257	DTX4
REACTOME_HEME_DEGRADATION	0	1	5	0.266475	0.675683	0.170257
REACTOME_METABOLISM_OF_FOLATE_AND_PTERINES	1	2	17	0.272256	0.675683	0.170257	ALDH1L1
REACTOME_VITAMIN_B1_THIAMIN_METABOLISM	0	1	5	0.266475	0.675683	0.170257
REACTOME_NOSTRIN_MEDIATED_ENOS_TRAFFICKING	0	1	5	0.266475	0.675683	0.170257
REACTOME_SEROTONIN_AND_MELATONIN_BIOSYNTHESIS	0	1	5	0.266475	0.675683	0.170257
REACTOME_REGULATION_OF_GENE_EXPRESSION_IN_ENDOCRINE_COMMITTED_NEUROG3PLUS_PROGENITOR_CELLS	0	1	5	0.266475	0.675683	0.170257
REACTOME_FBXW7_MUTANTS_AND_NOTCH1_IN_CANCER	0	1	5	0.266475	0.675683	0.170257
REACTOME_FICOLINS_BIND_TO_REPETITIVE_CARBOHYDRATE_STRUCTURES_ON_THE_TARGET_CELL_SURFACE	0	1	5	0.266475	0.675683	0.170257
REACTOME_SUMO_IS_CONJUGATED_TO_E1_UBA2:SAE1	0	1	5	0.266475	0.675683	0.170257
REACTOME_LRR_FLII_INTERACTING_PROTEIN_1_LRRFIP1_ACTIVATES_TYPE_I_IFN_PRODUCTION	0	1	5	0.266475	0.675683	0.170257
REACTOME_DEACTIVATION_OF_THE_BETA_CATENIN_TRANSACTIVATING_COMPLEX	3	3	42	0.24395	0.675683	0.170257	SOX6:SOX3:TCF7L2
REACTOME_TACHYKININ_RECEPTORS_BIND_TACHYKININS	0	1	5	0.266475	0.675683	0.170257
REACTOME_MUSCARINIC_ACETYLCHOLINE_RECEPTORS	0	1	5	0.266475	0.675683	0.170257
REACTOME_DOPAMINE_RECEPTORS	0	1	5	0.266475	0.675683	0.170257
REACTOME_EPHB_MEDIATED_FORWARD_SIGNALING	3	3	42	0.24395	0.675683	0.170257	GRIN1:ARHGEF28:GRIN2B
REACTOME_ARACHIDONATE_PRODUCTION_FROM_DAG	0	1	5	0.266475	0.675683	0.170257
REACTOME_SODIUM_COUPLED_SULPHATE_DI_AND_TRI_CARBOXYLATE_TRANSPORTERS	0	1	5	0.266475	0.675683	0.170257
REACTOME_FREE_FATTY_ACID_RECEPTORS	0	1	5	0.266475	0.675683	0.170257
REACTOME_SYNTHESIS_OF_GDP_MANNOSE	0	1	5	0.266475	0.675683	0.170257
REACTOME_SUMOYLATION_OF_DNA_METHYLATION_PROTEINS	1	1	16	0.249437	0.675683	0.170257	PCGF2
REACTOME_SIGNALING_BY_RETINOIC_ACID	3	3	43	0.257318	0.675683	0.170257	PDK4:ALDH1A1:CRABP1
REACTOME_DISEASES_OF_MISMATCH_REPAIR_MMR	0	1	5	0.266475	0.675683	0.170257
REACTOME_ORGANIC_ANION_TRANSPORT	0	1	5	0.266475	0.675683	0.170257
REACTOME_TRAFFICKING_OF_MYRISTOYLATED_PROTEINS_TO_THE_CILIUM	0	1	5	0.266475	0.675683	0.170257
REACTOME_FORMATION_OF_XYLULOSE_5_PHOSPHATE	0	1	5	0.266475	0.675683	0.170257
REACTOME_COPI_MEDIATED_ANTEROGRADE_TRANSPORT	7	7	101	0.260732	0.675683	0.170257	SPTB:SPTBN5:ANK2:ANK3:SPTBN4:SPTA1:TUBB8
REACTOME_G2_PHASE	0	1	5	0.266475	0.675683	0.170257
REACTOME_G2_M_DNA_REPLICATION_CHECKPOINT	0	1	5	0.266475	0.675683	0.170257
REACTOME_GALACTOSE_CATABOLISM	0	1	5	0.266475	0.675683	0.170257
REACTOME_PROPIONYL_COA_CATABOLISM	0	1	5	0.266475	0.675683	0.170257
REACTOME_IRS_ACTIVATION	0	1	5	0.266475	0.675683	0.170257
REACTOME_FASL_CD95L_SIGNALING	0	1	5	0.266475	0.675683	0.170257
REACTOME_BETA_OXIDATION_OF_OCTANOYL_COA_TO_HEXANOYL_COA	0	1	5	0.266475	0.675683	0.170257
REACTOME_BETA_OXIDATION_OF_HEXANOYL_COA_TO_BUTANOYL_COA	0	1	5	0.266475	0.675683	0.170257
REACTOME_BETA_OXIDATION_OF_BUTANOYL_COA_TO_ACETYL_COA	0	1	5	0.266475	0.675683	0.170257
REACTOME_PTK6_REGULATES_PROTEINS_INVOLVED_IN_RNA_PROCESSING	0	1	5	0.266475	0.675683	0.170257
REACTOME_PTK6_EXPRESSION	0	1	5	0.266475	0.675683	0.170257
REACTOME_SIGNALING_BY_MST1	0	1	5	0.266475	0.675683	0.170257
REACTOME_RUNX1_REGULATES_TRANSCRIPTION_OF_GENES_INVOLVED_IN_INTERLEUKIN_SIGNALING	0	1	5	0.266475	0.675683	0.170257
REACTOME_RUNX3_REGULATES_BCL2L11_BIM_TRANSCRIPTION	0	1	5	0.266475	0.675683	0.170257
REACTOME_TYROSINE_CATABOLISM	0	1	5	0.266475	0.675683	0.170257
REACTOME_SIGNALING_BY_TGF_BETA_FAMILY_MEMBERS	7	7	102	0.26939	0.675683	0.170257	PMEPA1:SKIL:SMAD6:BMPR1B:ACVRL1:SMAD1:TGIF1
REACTOME_TRAF6_MEDIATED_INDUCTION_OF_TAK1_COMPLEX_WITHIN_TLR4_COMPLEX	1	1	16	0.249437	0.675683	0.170257	TLR4
REACTOME_FOXO_MEDIATED_TRANSCRIPTION_OF_CELL_CYCLE_GENES	1	2	17	0.272256	0.675683	0.170257	BTG1
REACTOME_N_GLYCAN_TRIMMING_AND_ELONGATION_IN_THE_CIS_GOLGI	0	1	5	0.266475	0.675683	0.170257
REACTOME_SIGNALING_BY_FGFR2	5	5	73	0.274063	0.677921	0.168821	FGFR2:FGF9:GAB1:FGF1:FGF17
REACTOME_INTRACELLULAR_SIGNALING_BY_SECOND_MESSENGERS	20	19	302	0.273987	0.677921	0.168821	PREX2:ERBB3:FGFR2:FGFR3:ADCY2:FGF9:GAB1:FGF1:CD86:IL1RL1:ADCY4:PPARG:EGF:EGFR:PDE1C:FGF17:ADCY1:ADCY5:JUN:ERBB4
REACTOME_HS_GAG_BIOSYNTHESIS	2	2	31	0.284874	0.697755	0.156297	HS3ST1:HSPG2
REACTOME_EGFR_DOWNREGULATION	2	2	31	0.284874	0.697755	0.156297	EGF:EGFR
REACTOME_PYRUVATE_METABOLISM	2	2	31	0.284874	0.697755	0.156297	PDK4:ME1
REACTOME_MAPK_TARGETS_NUCLEAR_EVENTS_MEDIATED_BY_MAP_KINASES	2	2	31	0.284874	0.697755	0.156297	MEF2C:JUN
REACTOME_GLYOXYLATE_METABOLISM_AND_GLYCINE_DEGRADATION	2	2	31	0.284874	0.697755	0.156297	DAO:AGXT
REACTOME_SIGNALING_BY_MODERATE_KINASE_ACTIVITY_BRAF_MUTANTS	3	3	45	0.284455	0.697755	0.156297	VWF:FN1:KSR2
REACTOME_SIGNALLING_TO_ERKS	2	2	32	0.301619	0.701121	0.154207	RIT2:NTRK1
REACTOME_GASTRIN_CREB_SIGNALLING_PATHWAY_VIA_PKC_AND_MAPK	1	2	18	0.295047	0.701121	0.154207	EGFR
REACTOME_ACYL_CHAIN_REMODELLING_OF_PG	1	2	18	0.295047	0.701121	0.154207	PLA2R1
REACTOME_SIGNAL_AMPLIFICATION	2	2	32	0.301619	0.701121	0.154207	GNG4:GNAT3
REACTOME_CELL_EXTRACELLULAR_MATRIX_INTERACTIONS	1	2	18	0.295047	0.701121	0.154207	PARVA
REACTOME_TAK1_ACTIVATES_NFKB_BY_PHOSPHORYLATION_AND_ACTIVATION_OF_IKKS_COMPLEX	2	2	32	0.301619	0.701121	0.154207	S100A12:NOD2
REACTOME_ACTIVATION_OF_CASPASES_THROUGH_APOPTOSOME_MEDIATED_CLEAVAGE	0	1	6	0.31057	0.701121	0.154207
REACTOME_METHIONINE_SALVAGE_PATHWAY	0	1	6	0.31057	0.701121	0.154207
REACTOME_ACROSOME_REACTION_AND_SPERM:OOCYTE_MEMBRANE_BINDING	0	1	6	0.31057	0.701121	0.154207
REACTOME_RORA_ACTIVATES_GENE_EXPRESSION	1	2	18	0.295047	0.701121	0.154207	HELZ2
REACTOME_ACYL_CHAIN_REMODELING_OF_CL	0	1	6	0.31057	0.701121	0.154207
REACTOME_SULFIDE_OXIDATION_TO_SULFATE	0	1	6	0.31057	0.701121	0.154207
REACTOME_DISEASE	68	65	1075	0.294567	0.701121	0.154207	ABCB4:ABCC8:LTF:HDAC9:ERBB3:FGFR2:FGFR3:ABCC9:NOTCH3:SLC12A1:SLC4A4:SEMA5B:ADAMTS2:HEPH:SLC5A1:FGF9:CUBN:GAB1:SLC2A9:VWF:SEMA5A:FGF1:CD86:FN1:MUC5B:SV2C:NCAN:HEY2:CYP27A1:ADAMTS7:TLR4:STRA6:CYP19A1:CYP1B1:EGF:SLC12A6:ADAMTS17:SLC5A2:ADAMTS18:HSPG2:SYT2:EGFR:CDKN2A:TCF7L2:ADAMTS12:ADAMTSL3:FGF17:ANTXR2:ADAMTS9:SLC6A20:ABCA1:AMN:KSR2:MUCL1:CSPG4:JUN:ERBB4:MUC16:MAML2:MC2R:SV2B:THSD4:SLC2A10:SSPO:SL…
REACTOME_TELOMERE_EXTENSION_BY_TELOMERASE	0	1	6	0.31057	0.701121	0.154207
REACTOME_TRANSPORT_AND_SYNTHESIS_OF_PAPS	0	1	6	0.31057	0.701121	0.154207
REACTOME_PHOSPHORYLATION_OF_EMI1	0	1	6	0.31057	0.701121	0.154207
REACTOME_P75NTR_NEGATIVELY_REGULATES_CELL_CYCLE_VIA_SC1	0	1	6	0.31057	0.701121	0.154207
REACTOME_MINERALOCORTICOID_BIOSYNTHESIS	0	1	6	0.31057	0.701121	0.154207
REACTOME_NADE_MODULATES_DEATH_SIGNALLING	0	1	6	0.31057	0.701121	0.154207
REACTOME_VITAMINS	0	1	6	0.31057	0.701121	0.154207
REACTOME_SYNTHESIS_OF_15_EICOSATETRAENOIC_ACID_DERIVATIVES	0	1	6	0.31057	0.701121	0.154207
REACTOME_SUMO_IS_PROTEOLYTICALLY_PROCESSED	0	1	6	0.31057	0.701121	0.154207
REACTOME_VASOPRESSIN_LIKE_RECEPTORS	0	1	6	0.31057	0.701121	0.154207
REACTOME_ALPHA_OXIDATION_OF_PHYTANATE	0	1	6	0.31057	0.701121	0.154207
REACTOME_CA2PLUS_PATHWAY	4	4	61	0.30376	0.701121	0.154207	WNT11:PRKG2:TCF7L2:GNG4
REACTOME_PROTON_COUPLED_MONOCARBOXYLATE_TRANSPORT	0	1	6	0.31057	0.701121	0.154207
REACTOME_SYNTHESIS_OF_DOLICHYL_PHOSPHATE	0	1	6	0.31057	0.701121	0.154207
REACTOME_UPTAKE_AND_FUNCTION_OF_DIPHTHERIA_TOXIN	0	1	6	0.31057	0.701121	0.154207
REACTOME_MISSPLICED_LRP5_MUTANTS_HAVE_ENHANCED_BETA_CATENIN_DEPENDENT_SIGNALING	0	1	6	0.31057	0.701121	0.154207
REACTOME_ACTIVATION_OF_SMO	1	2	18	0.295047	0.701121	0.154207	EVC
REACTOME_CLEC7A_INFLAMMASOME_PATHWAY	0	1	6	0.31057	0.701121	0.154207
REACTOME_NEGATIVE_FEEDBACK_REGULATION_OF_MAPK_PATHWAY	0	1	6	0.31057	0.701121	0.154207
REACTOME_PROTEIN_REPAIR	0	1	6	0.31057	0.701121	0.154207
REACTOME_SENSING_OF_DNA_DOUBLE_STRAND_BREAKS	0	1	6	0.31057	0.701121	0.154207
REACTOME_SYNTHESIS_OF_WYBUTOSINE_AT_G37_OF_TRNA_PHE	0	1	6	0.31057	0.701121	0.154207
REACTOME_GDP_FUCOSE_BIOSYNTHESIS	0	1	6	0.31057	0.701121	0.154207
REACTOME_CHOLINE_CATABOLISM	0	1	6	0.31057	0.701121	0.154207
REACTOME_ASSEMBLY_OF_THE_ORC_COMPLEX_AT_THE_ORIGIN_OF_REPLICATION	0	1	6	0.31057	0.701121	0.154207
REACTOME_BETA_OXIDATION_OF_DECANOYL_COA_TO_OCTANOYL_COA_COA	0	1	6	0.31057	0.701121	0.154207
REACTOME_PTK6_REGULATES_CELL_CYCLE	0	1	6	0.31057	0.701121	0.154207
REACTOME_RAB_GEFS_EXCHANGE_GTP_FOR_GDP_ON_RABS	6	6	90	0.296134	0.701121	0.154207	RAB27B:DENND3:RIN2:ST5:DENND5B:DENND2C
REACTOME_RUNX1_REGULATES_ESTROGEN_RECEPTOR_MEDIATED_TRANSCRIPTION	0	1	6	0.31057	0.701121	0.154207
REACTOME_RUNX1_REGULATES_TRANSCRIPTION_OF_GENES_INVOLVED_IN_BCR_SIGNALING	0	1	6	0.31057	0.701121	0.154207
REACTOME_RUNX1_REGULATES_TRANSCRIPTION_OF_GENES_INVOLVED_IN_WNT_SIGNALING	0	1	6	0.31057	0.701121	0.154207
REACTOME_RUNX3_REGULATES_IMMUNE_RESPONSE_AND_CELL_MIGRATION	0	1	6	0.31057	0.701121	0.154207
REACTOME_PLASMA_LIPOPROTEIN_REMODELING	2	2	32	0.301619	0.701121	0.154207	APOB:LIPC
REACTOME_PHENYLALANINE_METABOLISM	0	1	6	0.31057	0.701121	0.154207
REACTOME_LIPID_PARTICLE_ORGANIZATION	0	1	6	0.31057	0.701121	0.154207
REACTOME_TLR3_MEDIATED_TICAM1_DEPENDENT_PROGRAMMED_CELL_DEATH	0	1	6	0.31057	0.701121	0.154207
REACTOME_BIOSYNTHESIS_OF_MARESIN_LIKE_SPMS	0	1	6	0.31057	0.701121	0.154207
REACTOME_MOLYBDENUM_COFACTOR_BIOSYNTHESIS	0	1	6	0.31057	0.701121	0.154207
REACTOME_ESTROGEN_STIMULATED_SIGNALING_THROUGH_PRKCZ	0	1	6	0.31057	0.701121	0.154207
REACTOME_NOTCH1_INTRACELLULAR_DOMAIN_REGULATES_TRANSCRIPTION	3	3	47	0.311985	0.701907	0.153721	HDAC9:HEY2:MAML2
REACTOME_GLUCAGON_TYPE_LIGAND_RECEPTORS	2	2	33	0.31841	0.701907	0.153721	ADCYAP1R1:GNG4
REACTOME_CD28_CO_STIMULATION	2	2	33	0.31841	0.701907	0.153721	PAK3:CD86
REACTOME_PROSTACYCLIN_SIGNALLING_THROUGH_PROSTACYCLIN_RECEPTOR	1	2	19	0.31773	0.701907	0.153721	GNG4
REACTOME_GABA_SYNTHESIS_RELEASE_REUPTAKE_AND_DEGRADATION	1	2	19	0.31773	0.701907	0.153721	RIMS1
REACTOME_NICOTINAMIDE_SALVAGING	1	2	19	0.31773	0.701907	0.153721	CYP8B1
REACTOME_EPHRIN_SIGNALING	1	2	19	0.31773	0.701907	0.153721	PAK3
REACTOME_VEGFR2_MEDIATED_CELL_PROLIFERATION	1	2	19	0.31773	0.701907	0.153721	KDR
REACTOME_RHO_GTPASES_ACTIVATE_CIT	1	2	19	0.31773	0.701907	0.153721	MYH14
REACTOME_RHO_GTPASES_ACTIVATE_ROCKS	1	2	19	0.31773	0.701907	0.153721	MYH14
REACTOME_CARGO_CONCENTRATION_IN_THE_ER	2	2	33	0.31841	0.701907	0.153721	COL7A1:SERPINA1
REACTOME_KERATINIZATION	14	13	216	0.318211	0.701907	0.153721	PKP1:DSP:KRT17:SPINK5:DSG3:ST14:KRT84:KRT1:KRT4:KRT2:JUP:DSG4:KRT77:KRTAP10-11
REACTOME_ASSEMBLY_OF_ACTIVE_LPL_AND_LIPC_LIPASE_COMPLEXES	1	2	19	0.31773	0.701907	0.153721	LIPC
REACTOME_LDL_CLEARANCE	1	2	19	0.31773	0.701907	0.153721	APOB
REACTOME_METABOLISM_OF_COFACTORS	1	2	19	0.31773	0.701907	0.153721	PRKG2
REACTOME_AMYLOID_FIBER_FORMATION	7	7	107	0.31378	0.701907	0.153721	LTF:LYZ:CST3:TGFBI:HSPG2:GSN:NPPA
REACTOME_G_ALPHA_Q_SIGNALLING_EVENTS	14	14	217	0.32458	0.714458	0.146023	EDN1:NTSR1:BRS3:RGSL1:ANXA1:DGKB:EGFR:EDNRA:DGKI:GNG4:ADRA1B:CYSLTR1:CCK:LPAR1
REACTOME_INOSITOL_PHOSPHATE_METABOLISM	3	3	48	0.325845	0.715141	0.145608	MTMR7:PLCE1:PLCH2
REACTOME_METABOLISM_OF_FAT_SOLUBLE_VITAMINS	3	3	48	0.325845	0.715141	0.145608	LRP2:APOB:HSPG2
REACTOME_SIGNALING_BY_NTRK1_TRKA	5	5	78	0.327233	0.717138	0.144397	ADCYAP1R1:MEF2C:NTRK2:RIT2:NTRK1
REACTOME_GLYCOSAMINOGLYCAN_METABOLISM	8	8	124	0.328352	0.718541	0.143549	HS3ST1:ST3GAL6:HAS1:B3GAT1:NCAN:HSPG2:CSPG4:CHST1
REACTOME_SIGNALING_BY_NODAL	1	2	20	0.340237	0.729841	0.136772	TDGF1
REACTOME_SIGNALING_BY_HIPPO	1	2	20	0.340237	0.729841	0.136772	TJP1
REACTOME_SIGNALLING_TO_RAS	1	2	20	0.340237	0.729841	0.136772	NTRK1
REACTOME_KERATAN_SULFATE_KERATIN_METABOLISM	2	3	34	0.335211	0.729841	0.136772	ST3GAL6:CHST1
REACTOME_GPVI_MEDIATED_ACTIVATION_CASCADE	2	3	35	0.351992	0.729841	0.136772	COL1A1:COL1A2
REACTOME_SEMA4D_INDUCED_CELL_MIGRATION_AND_GROWTH_CONE_COLLAPSE	1	2	20	0.340237	0.729841	0.136772	MYH14
REACTOME_SOS_MEDIATED_SIGNALLING	0	1	7	0.352018	0.729841	0.136772
REACTOME_INFLAMMASOMES	1	2	20	0.340237	0.729841	0.136772	NLRC4
REACTOME_ATTACHMENT_OF_GPI_ANCHOR_TO_UPAR	0	1	7	0.352018	0.729841	0.136772
REACTOME_PP2A_MEDIATED_DEPHOSPHORYLATION_OF_KEY_METABOLIC_FACTORS	0	1	7	0.352018	0.729841	0.136772
REACTOME_2_LTR_CIRCLE_FORMATION	0	1	7	0.352018	0.729841	0.136772
REACTOME_ACTIVATION_OF_C3_AND_C5	0	1	7	0.352018	0.729841	0.136772
REACTOME_SIGNALING_BY_EGFR	3	3	49	0.339742	0.729841	0.136772	GAB1:EGF:EGFR
REACTOME_NEF_MEDIATED_CD8_DOWN_REGULATION	0	1	7	0.352018	0.729841	0.136772
REACTOME_TRANSPORT_OF_CONNEXONS_TO_THE_PLASMA_MEMBRANE	1	2	20	0.340237	0.729841	0.136772	TUBB8
REACTOME_VITAMIN_B2_RIBOFLAVIN_METABOLISM	0	1	7	0.352018	0.729841	0.136772
REACTOME_CREB_PHOSPHORYLATION	0	1	7	0.352018	0.729841	0.136772
REACTOME_THE_RETINOID_CYCLE_IN_CONES_DAYLIGHT_VISION	0	1	7	0.352018	0.729841	0.136772
REACTOME_PHOSPHATE_BOND_HYDROLYSIS_BY_NUDT_PROTEINS	0	1	7	0.352018	0.729841	0.136772
REACTOME_SIGNALING_BY_NOTCH1_T_7_9_NOTCH1:M1580_K2555_TRANSLOCATION_MUTANT	0	1	7	0.352018	0.729841	0.136772
REACTOME_ACTIVATION_OF_NIMA_KINASES_NEK9_NEK6_NEK7	0	1	7	0.352018	0.729841	0.136772
REACTOME_SUMO_IS_TRANSFERRED_FROM_E1_TO_E2_UBE2I_UBC9	0	1	7	0.352018	0.729841	0.136772
REACTOME_DEX_H_BOX_HELICASES_ACTIVATE_TYPE_I_IFN_AND_INFLAMMATORY_CYTOKINES_PRODUCTION	0	1	7	0.352018	0.729841	0.136772
REACTOME_LOSS_OF_FUNCTION_OF_TGFBR1_IN_CANCER	0	1	7	0.352018	0.729841	0.136772
REACTOME_NECTIN_NECL_TRANS_HETERODIMERIZATION	0	1	7	0.352018	0.729841	0.136772
REACTOME_POST_TRANSCRIPTIONAL_SILENCING_BY_SMALL_RNAS	0	1	7	0.352018	0.729841	0.136772
REACTOME_RSK_ACTIVATION	0	1	7	0.352018	0.729841	0.136772
REACTOME_IKBA_VARIANT_LEADS_TO_EDA_ID	0	1	7	0.352018	0.729841	0.136772
REACTOME_APEX1_INDEPENDENT_RESOLUTION_OF_AP_SITES_VIA_THE_SINGLE_NUCLEOTIDE_REPLACEMENT_PATHWAY	0	1	7	0.352018	0.729841	0.136772
REACTOME_TRNA_PROCESSING_IN_THE_MITOCHONDRION	0	1	7	0.352018	0.729841	0.136772
REACTOME_WAX_AND_PLASMALOGEN_BIOSYNTHESIS	0	1	7	0.352018	0.729841	0.136772
REACTOME_RUNX3_REGULATES_CDKN1A_TRANSCRIPTION	0	1	7	0.352018	0.729841	0.136772
REACTOME_G_BETA:GAMMA_SIGNALLING_THROUGH_CDC42	1	2	20	0.340237	0.729841	0.136772	GNG4
REACTOME_LOSS_OF_MECP2_BINDING_ABILITY_TO_THE_NCOR_SMRT_COMPLEX	0	1	7	0.352018	0.729841	0.136772
REACTOME_ERYTHROPOIETIN_ACTIVATES_PHOSPHOLIPASE_C_GAMMA_PLCG	0	1	7	0.352018	0.729841	0.136772
REACTOME_ERYTHROPOIETIN_ACTIVATES_STAT5	0	1	7	0.352018	0.729841	0.136772
REACTOME_TYSND1_CLEAVES_PEROXISOMAL_PROTEINS	0	1	7	0.352018	0.729841	0.136772
REACTOME_ACTIVATION_OF_RAC1_DOWNSTREAM_OF_NMDARS	0	1	7	0.352018	0.729841	0.136772
REACTOME_GAP_JUNCTION_TRAFFICKING_AND_REGULATION	3	4	50	0.353658	0.732228	0.135354	TJP1:DAB2:TUBB8
REACTOME_CTLA4_INHIBITORY_SIGNALING	1	2	21	0.362507	0.747452	0.126416	CD86
REACTOME_HEMOSTASIS	42	41	674	0.361605	0.747452	0.126416	FGR:TFPI:RAB27B:CD84:ATP2B3:APOB:NOS1:TF:TGFB2:SLC8A3:COL1A1:VWF:PDE10A:FN1:PLEK:MPL:DOCK4:DGKB:PRKG2:MMRN1:PDE5A:EGF:LHFPL2:DOCK5:GUCY1A2:KCNMA1:ATP2B2:DGKI:COL1A2:GNG4:PCDH7:SELP:SLC8A1:GAS6:SELL:KIF19:HBG2:SERPINA1:IGLV3-21:GNAT3:HBB:TUBB8
REACTOME_CD209_DC_SIGN_SIGNALING	1	2	21	0.362507	0.747452	0.126416	PAK3
REACTOME_HS_GAG_DEGRADATION	1	2	22	0.384487	0.750417	0.124697	HSPG2
REACTOME_ACYL_CHAIN_REMODELLING_OF_PS	1	2	22	0.384487	0.750417	0.124697	PLA2R1
REACTOME_CD28_DEPENDENT_PI3K_AKT_SIGNALING	1	2	22	0.384487	0.750417	0.124697	CD86
REACTOME_JNK_C_JUN_KINASES_PHOSPHORYLATION_AND_ACTIVATION_MEDIATED_BY_ACTIVATED_HUMAN_TAK1	1	2	22	0.384487	0.750417	0.124697	NOD2
REACTOME_GLUTATHIONE_CONJUGATION	2	3	36	0.368722	0.750417	0.124697	MGST1:GSTM5
REACTOME_INTRINSIC_PATHWAY_FOR_APOPTOSIS	3	4	51	0.367574	0.750417	0.124697	TP63:BMF:SEPT4
REACTOME_POLB_DEPENDENT_LONG_PATCH_BASE_EXCISION_REPAIR	0	1	8	0.390978	0.750417	0.124697
REACTOME_INTRINSIC_PATHWAY_OF_FIBRIN_CLOT_FORMATION	1	2	22	0.384487	0.750417	0.124697	VWF
REACTOME_SYNTHESIS_OF_PG	0	1	8	0.390978	0.750417	0.124697
REACTOME_CHREBP_ACTIVATES_METABOLIC_GENE_EXPRESSION	0	1	8	0.390978	0.750417	0.124697
REACTOME_NEF_AND_SIGNAL_TRANSDUCTION	0	1	8	0.390978	0.750417	0.124697
REACTOME_LECTIN_PATHWAY_OF_COMPLEMENT_ACTIVATION	0	1	8	0.390978	0.750417	0.124697
REACTOME_COENZYME_A_BIOSYNTHESIS	0	1	8	0.390978	0.750417	0.124697
REACTOME_VITAMIN_C_ASCORBATE_METABOLISM	0	1	8	0.390978	0.750417	0.124697
REACTOME_WNT_MEDIATED_ACTIVATION_OF_DVL	0	1	8	0.390978	0.750417	0.124697
REACTOME_LINOLEIC_ACID_LA_METABOLISM	0	1	8	0.390978	0.750417	0.124697
REACTOME_UBIQUINOL_BIOSYNTHESIS	0	1	8	0.390978	0.750417	0.124697
REACTOME_METABOLISM_OF_INGESTED_SEMET_SEC_MESEC_INTO_H2SE	0	1	8	0.390978	0.750417	0.124697
REACTOME_DETOXIFICATION_OF_REACTIVE_OXYGEN_SPECIES	2	3	37	0.385372	0.750417	0.124697	CYBB:NOX5
REACTOME_SIGNALING_BY_TGF_BETA_RECEPTOR_COMPLEX_IN_CANCER	0	1	8	0.390978	0.750417	0.124697
REACTOME_DEFECTS_IN_BIOTIN_BTN_METABOLISM	0	1	8	0.390978	0.750417	0.124697
REACTOME_DEFECTIVE_CHST6_CAUSES_MCDC1	0	1	8	0.390978	0.750417	0.124697
REACTOME_DEFECTIVE_ST3GAL3_CAUSES_MCT12_AND_EIEE15	0	1	8	0.390978	0.750417	0.124697
REACTOME_DEFECTIVE_B4GALT1_CAUSES_B4GALT1_CDG_CDG_2D	0	1	8	0.390978	0.750417	0.124697
REACTOME_CLASS_A_1_RHODOPSIN_LIKE_RECEPTORS	20	20	321	0.37482	0.750417	0.124697	EDN1:HRH3:NTSR1:BRS3:OPN5:C5AR2:ANXA1:RGR:EDNRA:CCR1:NPY5R:ADRA1B:FPR1:RXFP1:CYSLTR1:S1PR5:MC2R:CCK:C5AR1:LPAR1
REACTOME_OREXIN_AND_NEUROPEPTIDES_FF_AND_QRFP_BIND_TO_THEIR_RESPECTIVE_RECEPTORS	0	1	8	0.390978	0.750417	0.124697
REACTOME_EPH_EPHRIN_MEDIATED_REPULSION_OF_CELLS	3	4	51	0.367574	0.750417	0.124697	EPHA3:EPHA7:EPHA10
REACTOME_SEMA4D_MEDIATED_INHIBITION_OF_CELL_ATTACHMENT_AND_MIGRATION	0	1	8	0.390978	0.750417	0.124697
REACTOME_FATTY_ACIDS_BOUND_TO_GPR40_FFAR1_REGULATE_INSULIN_SECRETION	0	1	8	0.390978	0.750417	0.124697
REACTOME_CREB1_PHOSPHORYLATION_THROUGH_THE_ACTIVATION_OF_CAMKII_CAMKK_CAMKIV_CASCASDE	0	1	8	0.390978	0.750417	0.124697
REACTOME_SYNTHESIS_OF_UDP_N_ACETYL_GLUCOSAMINE	0	1	8	0.390978	0.750417	0.124697
REACTOME_INTERLEUKIN_1_PROCESSING	0	1	8	0.390978	0.750417	0.124697
REACTOME_HUR_ELAVL1_BINDS_AND_STABILIZES_MRNA	0	1	8	0.390978	0.750417	0.124697
REACTOME_RNF_MUTANTS_SHOW_ENHANCED_WNT_SIGNALING_AND_PROLIFERATION	0	1	8	0.390978	0.750417	0.124697
REACTOME_PROGRAMMED_CELL_DEATH	11	11	178	0.382851	0.750417	0.124697	VIM:TP63:PKP1:DSP:TJP1:BMF:SEPT4:UNC5A:DSG3:TLR4:GSN
REACTOME_SYNTHESIS_OF_DIPHTHAMIDE_EEF2	0	1	8	0.390978	0.750417	0.124697
REACTOME_CARGO_TRAFFICKING_TO_THE_PERICILIARY_MEMBRANE	3	4	51	0.367574	0.750417	0.124697	CNGB1:LZTFL1:CNGA2
REACTOME_LIGAND_RECEPTOR_INTERACTIONS	0	1	8	0.390978	0.750417	0.124697
REACTOME_DEFECTIVE_CSF2RB_CAUSES_PULMONARY_SURFACTANT_METABOLISM_DYSFUNCTION_5_SMDP5	0	1	8	0.390978	0.750417	0.124697
REACTOME_RRNA_MODIFICATION_IN_THE_MITOCHONDRION	0	1	8	0.390978	0.750417	0.124697
REACTOME_DNA_REPLICATION_INITIATION	0	1	8	0.390978	0.750417	0.124697
REACTOME_HISTIDINE_CATABOLISM	0	1	8	0.390978	0.750417	0.124697
REACTOME_RECYCLING_OF_EIF2:GDP	0	1	8	0.390978	0.750417	0.124697
REACTOME_DNA_DAMAGE_REVERSAL	0	1	8	0.390978	0.750417	0.124697
REACTOME_TRAIL_SIGNALING	0	1	8	0.390978	0.750417	0.124697
REACTOME_SYNTHESIS_OF_KETONE_BODIES	0	1	8	0.390978	0.750417	0.124697
REACTOME_TRANSPORT_OF_FATTY_ACIDS	0	1	8	0.390978	0.750417	0.124697
REACTOME_PHOSPHATE_BOND_HYDROLYSIS_BY_NTPDASE_PROTEINS	0	1	8	0.390978	0.750417	0.124697
REACTOME_NEURODEGENERATIVE_DISEASES	1	2	22	0.384487	0.750417	0.124697	JUN
REACTOME_RUNX1_REGULATES_TRANSCRIPTION_OF_GENES_INVOLVED_IN_DIFFERENTIATION_OF_KERATINOCYTES	0	1	8	0.390978	0.750417	0.124697
REACTOME_RUNX2_REGULATES_GENES_INVOLVED_IN_CELL_MIGRATION	0	1	8	0.390978	0.750417	0.124697
REACTOME_COMPETING_ENDOGENOUS_RNAS_CERNAS_REGULATE_PTEN_TRANSLATION	0	1	8	0.390978	0.750417	0.124697
REACTOME_RUNX3_REGULATES_YAP1_MEDIATED_TRANSCRIPTION	0	1	8	0.390978	0.750417	0.124697
REACTOME_MECP2_REGULATES_TRANSCRIPTION_OF_NEURONAL_LIGANDS	0	1	8	0.390978	0.750417	0.124697
REACTOME_TRANSCRIPTIONAL_REGULATION_OF_WHITE_ADIPOCYTE_DIFFERENTIATION	5	6	84	0.392518	0.752409	0.123546	PPARGC1A:PCK1:HELZ2:PPARG:WNT10B
REACTOME_TRANSCRIPTIONAL_REGULATION_BY_THE_AP_2_TFAP2_FAMILY_OF_TRANSCRIPTION_FACTORS	2	3	38	0.401918	0.769445	0.113822	TFAP2A:EGFR
REACTOME_THROMBOXANE_SIGNALLING_THROUGH_TP_RECEPTOR	1	2	23	0.406131	0.770621	0.113159	GNG4
REACTOME_ACTIVATED_TAK1_MEDIATES_P38_MAPK_ACTIVATION	1	2	23	0.406131	0.770621	0.113159	NOD2
REACTOME_IKK_COMPLEX_RECRUITMENT_MEDIATED_BY_RIP1	1	2	23	0.406131	0.770621	0.113159	TLR4
REACTOME_RAF_INDEPENDENT_MAPK1_3_ACTIVATION	1	2	23	0.406131	0.770621	0.113159	DUSP8
REACTOME_NEPHRIN_FAMILY_INTERACTIONS	1	2	23	0.406131	0.770621	0.113159	KIRREL3
REACTOME_BBSOME_MEDIATED_CARGO_TARGETING_TO_CILIUM	1	2	23	0.406131	0.770621	0.113159	LZTFL1
REACTOME_MITOCHONDRIAL_CALCIUM_ION_TRANSPORT	1	2	23	0.406131	0.770621	0.113159	SLC8A3
REACTOME_GROWTH_HORMONE_RECEPTOR_SIGNALING	1	2	24	0.427401	0.771325	0.112763	PRLR
REACTOME_SYNTHESIS_OF_PA	2	3	39	0.418335	0.771325	0.112763	PLA2R1:LIPI
REACTOME_E2F_ENABLED_INHIBITION_OF_PRE_REPLICATION_COMPLEX_FORMATION	0	1	9	0.427599	0.771325	0.112763
REACTOME_XENOBIOTICS	1	2	24	0.427401	0.771325	0.112763	ARNT2
REACTOME_ASSOCIATION_OF_TRIC_CCT_WITH_TARGET_PROTEINS_DURING_BIOSYNTHESIS	2	3	39	0.418335	0.771325	0.112763	FKBP9:KIF13A
REACTOME_PROSTANOID_LIGAND_RECEPTORS	0	1	9	0.427599	0.771325	0.112763
REACTOME_SEMA4D_IN_SEMAPHORIN_SIGNALING	1	2	24	0.427401	0.771325	0.112763	MYH14
REACTOME_FORMATION_OF_FIBRIN_CLOT_CLOTTING_CASCADE	2	3	39	0.418335	0.771325	0.112763	TFPI:VWF
REACTOME_SYNTHESIS_OF_VERY_LONG_CHAIN_FATTY_ACYL_COAS	1	2	24	0.427401	0.771325	0.112763	ACSBG1
REACTOME_CYTOSOLIC_SULFONATION_OF_SMALL_MOLECULES	1	2	24	0.427401	0.771325	0.112763	SULT1C2
REACTOME_INTEGRATION_OF_PROVIRUS	0	1	9	0.427599	0.771325	0.112763
REACTOME_DISPLACEMENT_OF_DNA_GLYCOSYLASE_BY_APEX1	0	1	9	0.427599	0.771325	0.112763
REACTOME_MAPK1_ERK2_ACTIVATION	0	1	9	0.427599	0.771325	0.112763
REACTOME_HYDROLYSIS_OF_LPC	0	1	9	0.427599	0.771325	0.112763
REACTOME_MTOR_SIGNALLING	2	3	39	0.418335	0.771325	0.112763	PRKAG3:PRKAA2
REACTOME_NEF_MEDIATED_CD4_DOWN_REGULATION	0	1	9	0.427599	0.771325	0.112763
REACTOME_GLUCOCORTICOID_BIOSYNTHESIS	0	1	9	0.427599	0.771325	0.112763
REACTOME_CALCINEURIN_ACTIVATES_NFAT	0	1	9	0.427599	0.771325	0.112763
REACTOME_TRANSCRIPTIONAL_ACTIVATION_OF_MITOCHONDRIAL_BIOGENESIS	3	4	55	0.422899	0.771325	0.112763	MEF2C:PPARGC1A:HELZ2
REACTOME_SHC_RELATED_EVENTS_TRIGGERED_BY_IGF1R	0	1	9	0.427599	0.771325	0.112763
REACTOME_MYOCLONIC_EPILEPSY_OF_LAFORA	0	1	9	0.427599	0.771325	0.112763
REACTOME_BETA_OXIDATION_OF_PRISTANOYL_COA	0	1	9	0.427599	0.771325	0.112763
REACTOME_SODIUM_PROTON_EXCHANGERS	0	1	9	0.427599	0.771325	0.112763
REACTOME_SMALL_INTERFERING_RNA_SIRNA_BIOGENESIS	0	1	9	0.427599	0.771325	0.112763
REACTOME_CHL1_INTERACTIONS	0	1	9	0.427599	0.771325	0.112763
REACTOME_DISEASES_OF_IMMUNE_SYSTEM	1	2	24	0.427401	0.771325	0.112763	TLR4
REACTOME_RHO_GTPASES_ACTIVATE_RHOTEKIN_AND_RHOPHILINS	0	1	9	0.427599	0.771325	0.112763
REACTOME_TRNA_MODIFICATION_IN_THE_MITOCHONDRION	0	1	9	0.427599	0.771325	0.112763
REACTOME_PI5P_REGULATES_TP53_ACETYLATION	0	1	9	0.427599	0.771325	0.112763
REACTOME_TRANSPORT_OF_NUCLEOTIDE_SUGARS	0	1	9	0.427599	0.771325	0.112763
REACTOME_PTK6_REGULATES_RTKS_AND_THEIR_EFFECTORS_AKT1_AND_DOK1	0	1	9	0.427599	0.771325	0.112763
REACTOME_CREB3_FACTORS_ACTIVATE_GENES	0	1	9	0.427599	0.771325	0.112763
REACTOME_INLA_MEDIATED_ENTRY_OF_LISTERIA_MONOCYTOGENES_INTO_HOST_CELLS	0	1	9	0.427599	0.771325	0.112763
REACTOME_REGULATION_OF_PTEN_MRNA_TRANSLATION	0	1	9	0.427599	0.771325	0.112763
REACTOME_REGULATION_OF_PTEN_LOCALIZATION	0	1	9	0.427599	0.771325	0.112763
REACTOME_OAS_ANTIVIRAL_RESPONSE	0	1	9	0.427599	0.771325	0.112763
REACTOME_INTERLEUKIN_9_SIGNALING	0	1	9	0.427599	0.771325	0.112763
REACTOME_ROBO_RECEPTORS_BIND_AKAP5	0	1	9	0.427599	0.771325	0.112763
REACTOME_INTERLEUKIN_23_SIGNALING	0	1	9	0.427599	0.771325	0.112763
REACTOME_TRAF6_MEDIATED_NF_KB_ACTIVATION	1	2	24	0.427401	0.771325	0.112763	S100A12
REACTOME_SERINE_BIOSYNTHESIS	0	1	9	0.427599	0.771325	0.112763
REACTOME_INNATE_IMMUNE_SYSTEM	67	67	1104	0.432122	0.778547	0.108715	FGR:CFH:MGST1:LTF:ALOX5:SLC11A1:LRRC7:PAK3:MEF2C:PKP1:APOB:NOS1:LYZ:NLRC4:DSP:BPI:CST3:CRISPLD2:ATP8B4:ATP6V0A4:DTX4:C7:C9:ATP6V1B1:PADI2:MUC5B:ZBP1:MYH2:PTPRB:LILRB2:LGALS3:CHIT1:C5AR2:TLR4:GLIPR1:SLC2A5:S100A8:GSN:MS4A3:PIGR:S100A9:S100A12:NFASC:CYBB:ANPEP:BPIFB6:NOD2:KRT1:FPR1:MUCL1:JUP:JUN:ABCA13:DEFB119:MUC16:CD300E:SELL:MME:SERPINA1:C5AR1:FCGR3A:IGLV3-21:ATP6V1G2:MUC5AC:HBB:MGAM:CLEC5A
REACTOME_TRANSPORT_TO_THE_GOLGI_AND_SUBSEQUENT_MODIFICATION	11	12	185	0.435019	0.780949	0.107377	SPTB:COL7A1:SPTBN5:ANK2:ST8SIA6:ANK3:SPTBN4:SPTA1:MGAT4C:SERPINA1:TUBB8
REACTOME_DAP12_INTERACTIONS	2	3	40	0.434601	0.780949	0.107377	CD300E:CLEC5A
REACTOME_DISEASES_OF_METABOLISM	6	7	104	0.434967	0.780949	0.107377	CUBN:CYP27A1:CYP19A1:CYP1B1:AMN:MC2R
REACTOME_TOLL_LIKE_RECEPTOR_CASCADES	9	10	153	0.438907	0.786987	0.104032	MEF2C:APOB:BPI:TLR4:S100A8:S100A9:S100A12:NOD2:JUN
REACTOME_NEF_MEDIATED_DOWNREGULATION_OF_MHC_CLASS_I_COMPLEX_CELL_SURFACE_EXPRESSION	0	1	10	0.462021	0.795143	0.0995548
REACTOME_SIGNALING_BY_NOTCH1	4	5	73	0.448677	0.795143	0.0995548	HDAC9:DTX4:HEY2:MAML2
REACTOME_NUCLEAR_EVENTS_KINASE_AND_TRANSCRIPTION_FACTOR_ACTIVATION	1	2	25	0.448263	0.795143	0.0995548	MEF2C
REACTOME_SIGNAL_ATTENUATION	0	1	10	0.462021	0.795143	0.0995548
REACTOME_GLUCURONIDATION	1	2	25	0.448263	0.795143	0.0995548	UGT1A6
REACTOME_MAPK3_ERK1_ACTIVATION	0	1	10	0.462021	0.795143	0.0995548
REACTOME_CAMK_IV_MEDIATED_PHOSPHORYLATION_OF_CREB	0	1	10	0.462021	0.795143	0.0995548
REACTOME_ALPHA_DEFENSINS	0	1	10	0.462021	0.795143	0.0995548
REACTOME_SYNTHESIS_OF_PYROPHOSPHATES_IN_THE_CYTOSOL	0	1	10	0.462021	0.795143	0.0995548
REACTOME_SIGNALING_BY_VEGF	6	7	105	0.444906	0.795143	0.0995548	PAK3:KDR:CYBB:AXL:JUP:CDH5
REACTOME_AKT_PHOSPHORYLATES_TARGETS_IN_THE_NUCLEUS	0	1	10	0.462021	0.795143	0.0995548
REACTOME_ER_TO_GOLGI_ANTEROGRADE_TRANSPORT	9	10	154	0.447109	0.795143	0.0995548	SPTB:COL7A1:SPTBN5:ANK2:ANK3:SPTBN4:SPTA1:SERPINA1:TUBB8
REACTOME_MASTL_FACILITATES_MITOTIC_PROGRESSION	0	1	10	0.462021	0.795143	0.0995548
REACTOME_COHESIN_LOADING_ONTO_CHROMATIN	0	1	10	0.462021	0.795143	0.0995548
REACTOME_PROCESSING_AND_ACTIVATION_OF_SUMO	0	1	10	0.462021	0.795143	0.0995548
REACTOME_ATF6_ATF6_ALPHA_ACTIVATES_CHAPERONE_GENES	0	1	10	0.462021	0.795143	0.0995548
REACTOME_FOLDING_OF_ACTIN_BY_CCT_TRIC	0	1	10	0.462021	0.795143	0.0995548
REACTOME_G_BETA:GAMMA_SIGNALLING_THROUGH_PI3KGAMMA	1	2	25	0.448263	0.795143	0.0995548	GNG4
REACTOME_ACETYLCHOLINE_REGULATES_INSULIN_SECRETION	0	1	10	0.462021	0.795143	0.0995548
REACTOME_ADP_SIGNALLING_THROUGH_P2Y_PURINOCEPTOR_1	1	2	25	0.448263	0.795143	0.0995548	GNG4
REACTOME_ROLE_OF_SECOND_MESSENGERS_IN_NETRIN_1_SIGNALING	0	1	10	0.462021	0.795143	0.0995548
REACTOME_CALCITONIN_LIKE_LIGAND_RECEPTORS	0	1	10	0.462021	0.795143	0.0995548
REACTOME_ORGANIC_ANION_TRANSPORTERS	0	1	10	0.462021	0.795143	0.0995548
REACTOME_ZINC_INFLUX_INTO_CELLS_BY_THE_SLC39_GENE_FAMILY	0	1	10	0.462021	0.795143	0.0995548
REACTOME_HDR_THROUGH_MMEJ_ALT_NHEJ	0	1	10	0.462021	0.795143	0.0995548
REACTOME_DISEASES_ASSOCIATED_WITH_SURFACTANT_METABOLISM	0	1	10	0.462021	0.795143	0.0995548
REACTOME_UREA_CYCLE	0	1	10	0.462021	0.795143	0.0995548
REACTOME_KETONE_BODY_METABOLISM	0	1	10	0.462021	0.795143	0.0995548
REACTOME_RUNX1_AND_FOXP3_CONTROL_THE_DEVELOPMENT_OF_REGULATORY_T_LYMPHOCYTES_TREGS	0	1	10	0.462021	0.795143	0.0995548
REACTOME_HDL_REMODELING	0	1	10	0.462021	0.795143	0.0995548
REACTOME_SIGNALING_BY_ERYTHROPOIETIN	1	2	25	0.448263	0.795143	0.0995548	GAB1
REACTOME_INTERLEUKIN_21_SIGNALING	0	1	10	0.462021	0.795143	0.0995548
REACTOME_IRAK2_MEDIATED_ACTIVATION_OF_TAK1_COMPLEX	0	1	10	0.462021	0.795143	0.0995548
REACTOME_REGULATION_OF_FOXO_TRANSCRIPTIONAL_ACTIVITY_BY_ACETYLATION	0	1	10	0.462021	0.795143	0.0995548
REACTOME_REACTIONS_SPECIFIC_TO_THE_COMPLEX_N_GLYCAN_SYNTHESIS_PATHWAY	0	1	10	0.462021	0.795143	0.0995548
REACTOME_SIGNALING_BY_NOTCH1_IN_CANCER	3	4	58	0.463615	0.796058	0.0990551	HDAC9:HEY2:MAML2
REACTOME_SIGNALING_BY_RAS_MUTANTS	3	4	58	0.463615	0.796058	0.0990551	VWF:FN1:KSR2
REACTOME_AMINE_LIGAND_BINDING_RECEPTORS	2	3	42	0.466598	0.798437	0.0977595	HRH3:ADRA1B
REACTOME_GLUCAGON_LIKE_PEPTIDE_1_GLP1_REGULATES_INSULIN_SECRETION	2	3	42	0.466598	0.798437	0.0977595	GNG4:ADCY5
REACTOME_COOPERATION_OF_PDCL_PHLP1_AND_TRIC_CCT_IN_G_PROTEIN_BETA_FOLDING	2	3	42	0.466598	0.798437	0.0977595	GNG4:GNAT3
REACTOME_DOWNREGULATION_OF_TGF_BETA_RECEPTOR_SIGNALING	1	2	26	0.46869	0.800189	0.0968075	PMEPA1
REACTOME_ATF4_ACTIVATES_GENES_IN_RESPONSE_TO_ENDOPLASMIC_RETICULUM_STRESS	1	2	26	0.46869	0.800189	0.0968075	CCL2
REACTOME_EXTRA_NUCLEAR_ESTROGEN_SIGNALING	4	5	75	0.47239	0.805588	0.093887	EGF:EGFR:GNG4:GNAT3
REACTOME_ANDROGEN_BIOSYNTHESIS	0	1	11	0.494376	0.809028	0.0920363
REACTOME_ENDOSOMAL_VACUOLAR_PATHWAY	0	1	11	0.494376	0.809028	0.0920363
REACTOME_ACYL_CHAIN_REMODELLING_OF_PC	1	2	27	0.488658	0.809028	0.0920363	PLA2R1
REACTOME_REGULATED_PROTEOLYSIS_OF_P75NTR	0	1	11	0.494376	0.809028	0.0920363
REACTOME_SLBP_DEPENDENT_PROCESSING_OF_REPLICATION_DEPENDENT_HISTONE_PRE_MRNAS	0	1	11	0.494376	0.809028	0.0920363
REACTOME_INTERLEUKIN_6_SIGNALING	0	1	11	0.494376	0.809028	0.0920363
REACTOME_BMAL1:CLOCK_NPAS2_ACTIVATES_CIRCADIAN_GENE_EXPRESSION	1	2	27	0.488658	0.809028	0.0920363	HELZ2
REACTOME_PHASE_II_CONJUGATION_OF_COMPOUNDS	6	7	109	0.484302	0.809028	0.0920363	MGST1:ACSM2B:GSTM5:UGT1A6:ACSM2A:SULT1C2
REACTOME_PROCESSIVE_SYNTHESIS_ON_THE_C_STRAND_OF_THE_TELOMERE	0	1	11	0.494376	0.809028	0.0920363
REACTOME_HEME_BIOSYNTHESIS	0	1	11	0.494376	0.809028	0.0920363
REACTOME_BIOTIN_TRANSPORT_AND_METABOLISM	0	1	11	0.494376	0.809028	0.0920363
REACTOME_ENOS_ACTIVATION	0	1	11	0.494376	0.809028	0.0920363
REACTOME_CYP2E1_REACTIONS	0	1	11	0.494376	0.809028	0.0920363
REACTOME_MUCOPOLYSACCHARIDOSES	0	1	11	0.494376	0.809028	0.0920363
REACTOME_ESTABLISHMENT_OF_SISTER_CHROMATID_COHESION	0	1	11	0.494376	0.809028	0.0920363
REACTOME_CONDENSATION_OF_PROMETAPHASE_CHROMOSOMES	0	1	11	0.494376	0.809028	0.0920363
REACTOME_SIGNALING_BY_LEPTIN	0	1	11	0.494376	0.809028	0.0920363
REACTOME_INSULIN_PROCESSING	1	2	27	0.488658	0.809028	0.0920363	CPE
REACTOME_REGULATION_BY_C_FLIP	0	1	11	0.494376	0.809028	0.0920363
REACTOME_SUMOYLATION_OF_TRANSCRIPTION_COFACTORS	2	3	43	0.482294	0.809028	0.0920363	PPARGC1A:PCGF2
REACTOME_FREE_FATTY_ACIDS_REGULATE_INSULIN_SECRETION	0	1	11	0.494376	0.809028	0.0920363
REACTOME_SUMOYLATION_OF_IMMUNE_RESPONSE_PROTEINS	0	1	11	0.494376	0.809028	0.0920363
REACTOME_CLEC7A_DECTIN_1_INDUCES_NFAT_ACTIVATION	0	1	11	0.494376	0.809028	0.0920363
REACTOME_RHO_GTPASES_ACTIVATE_KTN1	0	1	11	0.494376	0.809028	0.0920363
REACTOME_METALLOTHIONEINS_BIND_METALS	0	1	11	0.494376	0.809028	0.0920363
REACTOME_FGFR2_ALTERNATIVE_SPLICING	1	2	27	0.488658	0.809028	0.0920363	FGFR2
REACTOME_CDC6_ASSOCIATION_WITH_THE_ORC:ORIGIN_COMPLEX	0	1	11	0.494376	0.809028	0.0920363
REACTOME_CREATINE_METABOLISM	0	1	11	0.494376	0.809028	0.0920363
REACTOME_PYRIMIDINE_SALVAGE	0	1	11	0.494376	0.809028	0.0920363
REACTOME_DEATH_RECEPTOR_SIGNALLING	8	9	141	0.475446	0.809028	0.0920363	NGEF:ARHGEF10L:SMPD3:ARHGEF16:FGD4:TIAM2:ARHGEF40:LINGO1
REACTOME_MET_ACTIVATES_RAS_SIGNALING	0	1	11	0.494376	0.809028	0.0920363
REACTOME_RECEPTOR_MEDIATED_MITOPHAGY	0	1	11	0.494376	0.809028	0.0920363
REACTOME_PHENYLALANINE_AND_TYROSINE_METABOLISM	0	1	11	0.494376	0.809028	0.0920363
REACTOME_GLYCOGEN_METABOLISM	1	2	27	0.488658	0.809028	0.0920363	PYGM
REACTOME_NOTCH4_ACTIVATION_AND_TRANSMISSION_OF_SIGNAL_TO_THE_NUCLEUS	0	1	11	0.494376	0.809028	0.0920363
REACTOME_TICAM1_TRAF6_DEPENDENT_INDUCTION_OF_TAK1_COMPLEX	0	1	11	0.494376	0.809028	0.0920363
REACTOME_INTERLEUKIN_27_SIGNALING	0	1	11	0.494376	0.809028	0.0920363
REACTOME_SIGNALING_BY_GPCR	70	71	1174	0.496159	0.810177	0.09142	NGEF:CNGB1:ARHGEF10L:ADCY2:EDN1:ADCYAP1R1:LRP2:APOB:WNT11:HRH3:NTSR1:BRS3:WNT2:FZD10:PDE10A:GRM6:GRK7:RPE65:CRHR1:RGSL1:GRM4:OPN5:ADCY4:SAG:ARHGEF16:PPP1R1B:WNT2B:C5AR2:ANXA1:DGKB:MYO7A:STRA6:FGD4:HSPG2:WNT9A:TIAM2:EGFR:RGR:EDNRA:OR14K1:GPR15:PDE1C:DGKI:PTH1R:CCR1:GRM2:NPY5R:ADCY1:ARHGEF40:GNG4:WNT10B:TAS1R3:ADRA1B:FPR1:RXFP1:ADCY5:CYSLTR1:PCP2:GRM8:S1PR5:PDE4B:MC2R:CCK:C5AR1:LPAR1:ABCA4:OR10R2:G…
REACTOME_ABC_TRANSPORTER_DISORDERS	4	5	77	0.495767	0.810177	0.09142	ABCB4:ABCC8:ABCC9:ABCA1
REACTOME_G1_PHASE	2	3	44	0.497767	0.811036	0.0909598	CDKN1C:CDKN2A
REACTOME_TRANSCRIPTIONAL_ACTIVITY_OF_SMAD2_SMAD3:SMAD4_HETEROTRIMER	2	3	44	0.497767	0.811036	0.0909598	SKIL:TGIF1
REACTOME_MITOCHONDRIAL_BIOGENESIS	5	6	94	0.500116	0.813095	0.0898588	MEF2C:PPARGC1A:PRKAG3:HELZ2:PRKAA2
REACTOME_POST_TRANSLATIONAL_MODIFICATION:_SYNTHESIS_OF_GPI_ANCHORED_PROTEINS	5	6	94	0.500116	0.813095	0.0898588	MDGA1:CNTN3:CNTN4:NTNG1:NTNG2
REACTOME_SIGNALING_BY_WNT	19	20	327	0.50089	0.813472	0.0896574	HECW1:WNT11:WNT2:SOX6:WLS:LGR6:WNT2B:SOX3:PRKG2:PRICKLE1:LGR5:WNT9A:TCF7L2:DACT1:GNG4:CXXC4:WNT10B:TCF4:LGR4
REACTOME_SULFUR_AMINO_ACID_METABOLISM	1	2	28	0.508149	0.823476	0.0843492	GADL1
REACTOME_SYNTHESIS_OF_PC	1	2	28	0.508149	0.823476	0.0843492	SLC44A5
REACTOME_TOLL_LIKE_RECEPTOR_9_TLR9_CASCADE	5	6	95	0.510562	0.826494	0.0827605	MEF2C:TLR4:S100A12:NOD2:JUN
REACTOME_HYALURONAN_UPTAKE_AND_DEGRADATION	0	1	12	0.524788	0.830684	0.0805643
REACTOME_REVERSIBLE_HYDRATION_OF_CARBON_DIOXIDE	0	1	12	0.524788	0.830684	0.0805643
REACTOME_PECAM1_INTERACTIONS	0	1	12	0.524788	0.830684	0.0805643
REACTOME_HORMONE_LIGAND_BINDING_RECEPTORS	0	1	12	0.524788	0.830684	0.0805643
REACTOME_SEROTONIN_RECEPTORS	0	1	12	0.524788	0.830684	0.0805643
REACTOME_PURINE_RIBONUCLEOSIDE_MONOPHOSPHATE_BIOSYNTHESIS	0	1	12	0.524788	0.830684	0.0805643
REACTOME_P2Y_RECEPTORS	0	1	12	0.524788	0.830684	0.0805643
REACTOME_UNWINDING_OF_DNA	0	1	12	0.524788	0.830684	0.0805643
REACTOME_GLUTATHIONE_SYNTHESIS_AND_RECYCLING	0	1	12	0.524788	0.830684	0.0805643
REACTOME_PREGNENOLONE_BIOSYNTHESIS	0	1	12	0.524788	0.830684	0.0805643
REACTOME_MISCELLANEOUS_SUBSTRATES	0	1	12	0.524788	0.830684	0.0805643
REACTOME_ATF6_ATF6_ALPHA_ACTIVATES_CHAPERONES	0	1	12	0.524788	0.830684	0.0805643
REACTOME_JOSEPHIN_DOMAIN_DUBS	0	1	12	0.524788	0.830684	0.0805643
REACTOME_LYSINE_CATABOLISM	0	1	12	0.524788	0.830684	0.0805643
REACTOME_VLDLR_INTERNALISATION_AND_DEGRADATION	0	1	12	0.524788	0.830684	0.0805643
REACTOME_RRNA_PROCESSING_IN_THE_MITOCHONDRION	0	1	12	0.524788	0.830684	0.0805643
REACTOME_TICAM1_DEPENDENT_ACTIVATION_OF_IRF3_IRF7	0	1	12	0.524788	0.830684	0.0805643
REACTOME_INTERLEUKIN_2_SIGNALING	0	1	12	0.524788	0.830684	0.0805643
REACTOME_NF_KB_ACTIVATION_THROUGH_FADD_RIP_1_PATHWAY_MEDIATED_BY_CASPASE_8_AND_10	0	1	12	0.524788	0.830684	0.0805643
REACTOME_REGULATION_OF_LOCALIZATION_OF_FOXO_TRANSCRIPTION_FACTORS	0	1	12	0.524788	0.830684	0.0805643
REACTOME_REGULATION_OF_GLYCOLYSIS_BY_FRUCTOSE_2_6_BISPHOSPHATE_METABOLISM	0	1	12	0.524788	0.830684	0.0805643
REACTOME_ACYL_CHAIN_REMODELLING_OF_PE	1	2	29	0.527148	0.83266	0.0795323	PLA2R1
REACTOME_PEROXISOMAL_LIPID_METABOLISM	1	2	29	0.527148	0.83266	0.0795323	ACOT6
REACTOME_SYNTHESIS_OF_SUBSTRATES_IN_N_GLYCAN_BIOSYTHESIS	3	4	63	0.52898	0.834675	0.0784825	ST3GAL6:ST6GALNAC1:ST8SIA6
REACTOME_TOLL_LIKE_RECEPTOR_TLR1:TLR2_CASCADE	5	6	97	0.531205	0.836424	0.0775734	MEF2C:TLR4:S100A12:NOD2:JUN
REACTOME_TRIF_TICAM1_MEDIATED_TLR4_SIGNALING	5	6	97	0.531205	0.836424	0.0775734	MEF2C:TLR4:S100A12:NOD2:JUN
REACTOME_COMPLEMENT_CASCADE	6	7	114	0.532351	0.83735	0.0770928	CFH:C7:C9:C5AR2:C5AR1:IGLV3-21
REACTOME_TRAFFICKING_AND_PROCESSING_OF_ENDOSOMAL_TLR	0	1	13	0.553374	0.849035	0.0710744
REACTOME_P38MAPK_EVENTS	0	1	13	0.553374	0.849035	0.0710744
REACTOME_SYNTHESIS_OF_PE	0	1	13	0.553374	0.849035	0.0710744
REACTOME_THE_ACTIVATION_OF_ARYLSULFATASES	0	1	13	0.553374	0.849035	0.0710744
REACTOME_APOPTOSIS_INDUCED_DNA_FRAGMENTATION	0	1	13	0.553374	0.849035	0.0710744
REACTOME_KERATAN_SULFATE_DEGRADATION	0	1	13	0.553374	0.849035	0.0710744
REACTOME_ERKS_ARE_INACTIVATED	0	1	13	0.553374	0.849035	0.0710744
REACTOME_P75NTR_RECRUITS_SIGNALLING_COMPLEXES	0	1	13	0.553374	0.849035	0.0710744
REACTOME_PURINE_SALVAGE	0	1	13	0.553374	0.849035	0.0710744
REACTOME_TIGHT_JUNCTION_INTERACTIONS	1	2	30	0.545643	0.849035	0.0710744	CLDN11
REACTOME_INHIBITION_OF_REPLICATION_INITIATION_OF_DAMAGED_DNA_BY_RB1_E2F1	0	1	13	0.553374	0.849035	0.0710744
REACTOME_CYTOCHROME_C_MEDIATED_APOPTOTIC_RESPONSE	0	1	13	0.553374	0.849035	0.0710744
REACTOME_MITOCHONDRIAL_IRON_SULFUR_CLUSTER_BIOGENESIS	0	1	13	0.553374	0.849035	0.0710744
REACTOME_SIGNALING_BY_ACTIVIN	0	1	13	0.553374	0.849035	0.0710744
REACTOME_ALPHA_LINOLENIC_OMEGA3_AND_LINOLEIC_OMEGA6_ACID_METABOLISM	0	1	13	0.553374	0.849035	0.0710744
REACTOME_NF_KB_IS_ACTIVATED_AND_SIGNALS_SURVIVAL	0	1	13	0.553374	0.849035	0.0710744
REACTOME_CYTOSOLIC_IRON_SULFUR_CLUSTER_ASSEMBLY	0	1	13	0.553374	0.849035	0.0710744
REACTOME_NUCLEAR_ENVELOPE_REASSEMBLY	0	1	13	0.553374	0.849035	0.0710744
REACTOME_WNT5A_DEPENDENT_INTERNALIZATION_OF_FZD2_FZD5_AND_ROR2	0	1	13	0.553374	0.849035	0.0710744
REACTOME_TNFR1_INDUCED_PROAPOPTOTIC_SIGNALING	0	1	13	0.553374	0.849035	0.0710744
REACTOME_CHK1_CHK2_CDS1_MEDIATED_INACTIVATION_OF_CYCLIN_B:CDK1_COMPLEX	0	1	13	0.553374	0.849035	0.0710744
REACTOME_DISSOLUTION_OF_FIBRIN_CLOT	0	1	13	0.553374	0.849035	0.0710744
REACTOME_METABOLISM_OF_STEROIDS	8	10	150	0.551101	0.849035	0.0710744	CYP46A1:LRP2:CUBN:ABCC3:HELZ2:CYP27A1:CYP19A1:CYP8B1
REACTOME_PERVASIVE_DEVELOPMENTAL_DISORDERS	0	1	13	0.553374	0.849035	0.0710744
REACTOME_SIGNALING_BY_BRAF_AND_RAF_FUSIONS	3	4	65	0.554021	0.849159	0.0710111	VWF:FN1:KSR2
REACTOME_ACTIVATED_NOTCH1_TRANSMITS_SIGNAL_TO_THE_NUCLEUS	1	2	31	0.563627	0.860364	0.0653178	DTX4
REACTOME_NICOTINATE_METABOLISM	1	2	31	0.563627	0.860364	0.0653178	CYP8B1
REACTOME_PERK_REGULATES_GENE_EXPRESSION	1	2	31	0.563627	0.860364	0.0653178	CCL2
REACTOME_RHO_GTPASES_ACTIVATE_IQGAPS	1	2	31	0.563627	0.860364	0.0653178	TUBB8
REACTOME_NUCLEAR_SIGNALING_BY_ERBB4	1	2	32	0.581095	0.864148	0.0634121	ERBB4
REACTOME_TRIGLYCERIDE_BIOSYNTHESIS	0	1	14	0.580242	0.864148	0.0634121
REACTOME_TGF_BETA_RECEPTOR_SIGNALING_ACTIVATES_SMADS	1	2	32	0.581095	0.864148	0.0634121	PMEPA1
REACTOME_AKT_PHOSPHORYLATES_TARGETS_IN_THE_CYTOSOL	0	1	14	0.580242	0.864148	0.0634121
REACTOME_PEPTIDE_HORMONE_BIOSYNTHESIS	0	1	14	0.580242	0.864148	0.0634121
REACTOME_THROMBIN_SIGNALLING_THROUGH_PROTEINASE_ACTIVATED_RECEPTORS_PARS	1	2	32	0.581095	0.864148	0.0634121	GNG4
REACTOME_DCC_MEDIATED_ATTRACTIVE_SIGNALING	0	1	14	0.580242	0.864148	0.0634121
REACTOME_IRAK1_RECRUITS_IKK_COMPLEX	0	1	14	0.580242	0.864148	0.0634121
REACTOME_REGULATION_OF_IFNG_SIGNALING	0	1	14	0.580242	0.864148	0.0634121
REACTOME_TRAF3_DEPENDENT_IRF_ACTIVATION_PATHWAY	0	1	14	0.580242	0.864148	0.0634121
REACTOME_TRAF6_MEDIATED_IRF7_ACTIVATION_IN_TLR7_8_OR_9_SIGNALING	0	1	14	0.580242	0.864148	0.0634121
REACTOME_EARLY_PHASE_OF_HIV_LIFE_CYCLE	0	1	14	0.580242	0.864148	0.0634121
REACTOME_TRYPTOPHAN_CATABOLISM	0	1	14	0.580242	0.864148	0.0634121
REACTOME_METHYLATION	0	1	14	0.580242	0.864148	0.0634121
REACTOME_GOLGI_CISTERNAE_PERICENTRIOLAR_STACK_REORGANIZATION	0	1	14	0.580242	0.864148	0.0634121
REACTOME_SMAD2_SMAD3:SMAD4_HETEROTRIMER_REGULATES_TRANSCRIPTION	1	2	32	0.581095	0.864148	0.0634121	TGIF1
REACTOME_G_PROTEIN_BETA:GAMMA_SIGNALLING	1	2	32	0.581095	0.864148	0.0634121	GNG4
REACTOME_RESPONSE_TO_METAL_IONS	0	1	14	0.580242	0.864148	0.0634121
REACTOME_TP53_REGULATES_TRANSCRIPTION_OF_GENES_INVOLVED_IN_G1_CELL_CYCLE_ARREST	0	1	14	0.580242	0.864148	0.0634121
REACTOME_MITOTIC_TELOPHASE_CYTOKINESIS	0	1	14	0.580242	0.864148	0.0634121
REACTOME_LEADING_STRAND_SYNTHESIS	0	1	14	0.580242	0.864148	0.0634121
REACTOME_PTK6_REGULATES_RHO_GTPASES_RAS_GTPASE_AND_MAP_KINASES	0	1	14	0.580242	0.864148	0.0634121
REACTOME_GLUTAMATE_AND_GLUTAMINE_METABOLISM	0	1	14	0.580242	0.864148	0.0634121
REACTOME_INTERLEUKIN_15_SIGNALING	0	1	14	0.580242	0.864148	0.0634121
REACTOME_ERYTHROPOIETIN_ACTIVATES_RAS	0	1	14	0.580242	0.864148	0.0634121
REACTOME_MYD88_CASCADE_INITIATED_ON_PLASMA_MEMBRANE	4	6	84	0.574105	0.864148	0.0634121	MEF2C:S100A12:NOD2:JUN
REACTOME_ACTIVATION_OF_HOX_GENES_DURING_DIFFERENTIATION	6	8	120	0.587526	0.872846	0.0590626	PAX6:HOXA3:MEIS1:JUN:PBX1:PCGF2
REACTOME_SIGNALING_BY_NOTCH2	1	2	33	0.598042	0.88206	0.054502	MAML2
REACTOME_PROCESSIVE_SYNTHESIS_ON_THE_LAGGING_STRAND	0	1	15	0.605497	0.88206	0.054502
REACTOME_MRNA_DECAY_BY_5_TO_3_EXORIBONUCLEASE	0	1	15	0.605497	0.88206	0.054502
REACTOME_METABOLISM_OF_CARBOHYDRATES	16	18	293	0.595958	0.88206	0.054502	HS3ST1:ST3GAL6:PYGM:HAS1:B3GAT1:PCK1:NCAN:SLC37A2:HSPG2:ALDH1A1:PGK2:B3GALT1:FUT9:CSPG4:CHST1:B3GALT5
REACTOME_THE_NLRP3_INFLAMMASOME	0	1	15	0.605497	0.88206	0.054502
REACTOME_ACTIVATION_OF_BAD_AND_TRANSLOCATION_TO_MITOCHONDRIA	0	1	15	0.605497	0.88206	0.054502
REACTOME_ACTIVATION_OF_MATRIX_METALLOPROTEINASES	1	2	33	0.598042	0.88206	0.054502	KLK2
REACTOME_METABOLISM_OF_NITRIC_OXIDE:_ENOS_ACTIVATION_AND_REGULATION	0	1	15	0.605497	0.88206	0.054502
REACTOME_FCGR_ACTIVATION	3	5	69	0.601879	0.88206	0.054502	FGR:FCGR3A:IGLV3-21
REACTOME_FATTY_ACIDS	0	1	15	0.605497	0.88206	0.054502
REACTOME_SCAVENGING_OF_HEME_FROM_PLASMA	3	5	69	0.601879	0.88206	0.054502	CD163:IGLV3-21:HBB
REACTOME_SIGNALING_BY_NOTCH1_HD_DOMAIN_MUTANTS_IN_CANCER	0	1	15	0.605497	0.88206	0.054502
REACTOME_DEPOLYMERISATION_OF_THE_NUCLEAR_LAMINA	0	1	15	0.605497	0.88206	0.054502
REACTOME_PHOSPHORYLATION_SITE_MUTANTS_OF_CTNNB1_ARE_NOT_TARGETED_TO_THE_PROTEASOME_BY_THE_DESTRUCTION_COMPLEX	0	1	15	0.605497	0.88206	0.054502
REACTOME_WNT5A_DEPENDENT_INTERNALIZATION_OF_FZD4	0	1	15	0.605497	0.88206	0.054502
REACTOME_MISMATCH_REPAIR	0	1	15	0.605497	0.88206	0.054502
REACTOME_PENTOSE_PHOSPHATE_PATHWAY	0	1	15	0.605497	0.88206	0.054502
REACTOME_INLB_MEDIATED_ENTRY_OF_LISTERIA_MONOCYTOGENES_INTO_HOST_CELL	0	1	15	0.605497	0.88206	0.054502
REACTOME_NUCLEOBASE_BIOSYNTHESIS	0	1	15	0.605497	0.88206	0.054502
REACTOME_RAB_REGULATION_OF_TRAFFICKING	6	8	122	0.605188	0.88206	0.054502	RAB27B:DENND3:RIN2:ST5:DENND5B:DENND2C
REACTOME_CIRCADIAN_CLOCK	3	5	70	0.613348	0.891664	0.0497988	MEF2C:PPARGC1A:HELZ2
REACTOME_METABOLISM_OF_STEROID_HORMONES	1	3	34	0.614469	0.891664	0.0497988	CYP19A1
REACTOME_SIGNALING_BY_WNT_IN_CANCER	1	3	34	0.614469	0.891664	0.0497988	TCF7L2
REACTOME_TRANSCRIPTIONAL_REGULATION_BY_E2F6	1	3	34	0.614469	0.891664	0.0497988	PCGF2
REACTOME_SPRY_REGULATION_OF_FGF_SIGNALING	0	1	16	0.629234	0.893133	0.049084
REACTOME_REGULATION_OF_KIT_SIGNALING	0	1	16	0.629234	0.893133	0.049084
REACTOME_TGF_BETA_RECEPTOR_SIGNALING_IN_EMT_EPITHELIAL_TO_MESENCHYMAL_TRANSITION	0	1	16	0.629234	0.893133	0.049084
REACTOME_SYNTHESIS_OF_PIPS_AT_THE_EARLY_ENDOSOME_MEMBRANE	0	1	16	0.629234	0.893133	0.049084
REACTOME_NRIF_SIGNALS_CELL_DEATH_FROM_THE_NUCLEUS	0	1	16	0.629234	0.893133	0.049084
REACTOME_NUCLEOTIDE_LIKE_PURINERGIC_RECEPTORS	0	1	16	0.629234	0.893133	0.049084
REACTOME_LYSOSOME_VESICLE_BIOGENESIS	1	3	35	0.630377	0.893133	0.049084	CLVS2
REACTOME_MRNA_DECAY_BY_3_TO_5_EXORIBONUCLEASE	0	1	16	0.629234	0.893133	0.049084
REACTOME_RAP1_SIGNALLING	0	1	16	0.629234	0.893133	0.049084
REACTOME_NOD1_2_SIGNALING_PATHWAY	1	3	35	0.630377	0.893133	0.049084	NOD2
REACTOME_METABOLISM_OF_PORPHYRINS	0	1	16	0.629234	0.893133	0.049084
REACTOME_TRANSCRIPTION_OF_E2F_TARGETS_UNDER_NEGATIVE_CONTROL_BY_P107_RBL1_AND_P130_RBL2_IN_COMPLEX_WITH_HDAC1	0	1	16	0.629234	0.893133	0.049084
REACTOME_ELEVATION_OF_CYTOSOLIC_CA2PLUS_LEVELS	0	1	16	0.629234	0.893133	0.049084
REACTOME_TRANSLOCATION_OF_SLC2A4_GLUT4_TO_THE_PLASMA_MEMBRANE	3	5	71	0.62461	0.893133	0.049084	PRKAG3:PRKAA2:TUBB8
REACTOME_POLO_LIKE_KINASE_MEDIATED_EVENTS	0	1	16	0.629234	0.893133	0.049084
REACTOME_ASSEMBLY_OF_THE_HIV_VIRION	0	1	16	0.629234	0.893133	0.049084
REACTOME_P75NTR_SIGNALS_VIA_NF_KB	0	1	16	0.629234	0.893133	0.049084
REACTOME_ONCOGENE_INDUCED_SENESCENCE	1	3	35	0.630377	0.893133	0.049084	CDKN2A
REACTOME_GLYCOGEN_STORAGE_DISEASES	0	1	16	0.629234	0.893133	0.049084
REACTOME_GLYCOGEN_SYNTHESIS	0	1	16	0.629234	0.893133	0.049084
REACTOME_SIGNAL_REGULATORY_PROTEIN_FAMILY_INTERACTIONS	0	1	16	0.629234	0.893133	0.049084
REACTOME_INTERLEUKIN_17_SIGNALING	3	5	71	0.62461	0.893133	0.049084	MEF2C:NOD2:JUN
REACTOME_MAP3K8_TPL2_DEPENDENT_MAPK1_3_ACTIVATION	0	1	16	0.629234	0.893133	0.049084
REACTOME_PROCESSING_OF_SMDT1	0	1	16	0.629234	0.893133	0.049084
REACTOME_FOXO_MEDIATED_TRANSCRIPTION_OF_CELL_DEATH_GENES	0	1	16	0.629234	0.893133	0.049084
REACTOME_NUCLEOTIDE_BINDING_DOMAIN_LEUCINE_RICH_REPEAT_CONTAINING_RECEPTOR_NLR_SIGNALING_PATHWAYS	2	4	54	0.637886	0.902919	0.0443514	NLRC4:NOD2
REACTOME_PYRUVATE_METABOLISM_AND_CITRIC_ACID_TCA_CYCLE	2	4	55	0.650289	0.909372	0.0412582	PDK4:ME1
REACTOME_SIGNALING_BY_TGF_BETA_RECEPTOR_COMPLEX	3	5	73	0.646502	0.909372	0.0412582	PMEPA1:SKIL:TGIF1
REACTOME_TOLL_LIKE_RECEPTOR_4_TLR4_CASCADE	6	8	127	0.647536	0.909372	0.0412582	MEF2C:BPI:TLR4:S100A12:NOD2:JUN
REACTOME_BETA_CATENIN_PHOSPHORYLATION_CASCADE	0	2	17	0.651545	0.909372	0.0412582
REACTOME_FORMATION_OF_SENESCENCE_ASSOCIATED_HETEROCHROMATIN_FOCI_SAHF	0	2	17	0.651545	0.909372	0.0412582
REACTOME_DISEASES_ASSOCIATED_WITH_N_GLYCOSYLATION_OF_PROTEINS	0	2	17	0.651545	0.909372	0.0412582
REACTOME_BUTYRATE_RESPONSE_FACTOR_1_BRF1_BINDS_AND_DESTABILIZES_MRNA	0	2	17	0.651545	0.909372	0.0412582
REACTOME_TRISTETRAPROLIN_TTP_ZFP36_BINDS_AND_DESTABILIZES_MRNA	0	2	17	0.651545	0.909372	0.0412582
REACTOME_KSRP_KHSRP_BINDS_AND_DESTABILIZES_MRNA	0	2	17	0.651545	0.909372	0.0412582
REACTOME_TRANSLESION_SYNTHESIS_BY_POLK	0	2	17	0.651545	0.909372	0.0412582
REACTOME_TNF_RECEPTOR_SUPERFAMILY_TNFSF_MEMBERS_MEDIATING_NON_CANONICAL_NF_KB_PATHWAY	0	2	17	0.651545	0.909372	0.0412582
REACTOME_IL_6_TYPE_CYTOKINE_RECEPTOR_LIGAND_INTERACTIONS	0	2	17	0.651545	0.909372	0.0412582
REACTOME_PROTEIN_METHYLATION	0	2	17	0.651545	0.909372	0.0412582
REACTOME_REGULATION_OF_RUNX1_EXPRESSION_AND_ACTIVITY	0	2	17	0.651545	0.909372	0.0412582
REACTOME_NUCLEOBASE_CATABOLISM	1	3	36	0.645768	0.909372	0.0412582	UPB1
REACTOME_GENERATION_OF_SECOND_MESSENGER_MOLECULES	1	3	37	0.660648	0.917804	0.0372498	PAK3
REACTOME_FATTY_ACYL_COA_BIOSYNTHESIS	1	3	37	0.660648	0.917804	0.0372498	ACSBG1
REACTOME_GAP_JUNCTION_ASSEMBLY	1	3	37	0.660648	0.917804	0.0372498	TUBB8
REACTOME_REGULATION_OF_TP53_EXPRESSION_AND_DEGRADATION	1	3	37	0.660648	0.917804	0.0372498	CDKN2A
REACTOME_RUNX1_INTERACTS_WITH_CO_FACTORS_WHOSE_PRECISE_EFFECT_ON_RUNX1_TARGETS_IS_NOT_KNOWN	1	3	37	0.660648	0.917804	0.0372498	AUTS2
REACTOME_SYNTHESIS_OF_PIPS_AT_THE_GOLGI_MEMBRANE	0	2	18	0.672516	0.926563	0.033125
REACTOME_TIE2_SIGNALING	0	2	18	0.672516	0.926563	0.033125
REACTOME_PURINE_CATABOLISM	0	2	18	0.672516	0.926563	0.033125
REACTOME_FORMATION_OF_ATP_BY_CHEMIOSMOTIC_COUPLING	0	2	18	0.672516	0.926563	0.033125
REACTOME_SYNTHESIS_OF_GLYCOSYLPHOSPHATIDYLINOSITOL_GPI	0	2	18	0.672516	0.926563	0.033125
REACTOME_SIGNALING_BY_CYTOSOLIC_FGFR1_FUSION_MUTANTS	0	2	18	0.672516	0.926563	0.033125
REACTOME_DISEASES_ASSOCIATED_WITH_GLYCOSYLATION_PRECURSOR_BIOSYNTHESIS	0	2	18	0.672516	0.926563	0.033125
REACTOME_TP53_REGULATES_TRANSCRIPTION_OF_GENES_INVOLVED_IN_G2_CELL_CYCLE_ARREST	0	2	18	0.672516	0.926563	0.033125
REACTOME_RNA_POLYMERASE_III_CHAIN_ELONGATION	0	2	18	0.672516	0.926563	0.033125
REACTOME_DEGRADATION_OF_DVL	2	4	57	0.674177	0.928	0.0324521	HECW1:DACT1
REACTOME_OVARIAN_TUMOR_DOMAIN_PROTEASES	1	3	38	0.675022	0.92831	0.0323072	NOD2
REACTOME_HEDGEHOG_OFF_STATE	5	7	113	0.680425	0.934882	0.0292431	GLI2:ADCY2:ADCY4:ADCY1:ADCY5
REACTOME_PROCESSING_OF_INTRONLESS_PRE_MRNAS	0	2	19	0.692226	0.941603	0.0261322
REACTOME_SYNTHESIS_SECRETION_AND_DEACYLATION_OF_GHRELIN	0	2	19	0.692226	0.941603	0.0261322
REACTOME_BRANCHED_CHAIN_AMINO_ACID_CATABOLISM	0	2	19	0.692226	0.941603	0.0261322
REACTOME_PHOSPHORYLATION_OF_THE_APC_C	0	2	19	0.692226	0.941603	0.0261322
REACTOME_TRANSLESION_SYNTHESIS_BY_POLH	0	2	19	0.692226	0.941603	0.0261322
REACTOME_TRANSCRIPTION_OF_E2F_TARGETS_UNDER_NEGATIVE_CONTROL_BY_DREAM_COMPLEX	0	2	19	0.692226	0.941603	0.0261322
REACTOME_GAMMA_CARBOXYLATION_HYPUSINE_FORMATION_AND_ARYLSULFATASE_ACTIVATION	1	3	39	0.688897	0.941603	0.0261322	GAS6
REACTOME_TICAM1_RIP1_MEDIATED_IKK_COMPLEX_RECRUITMENT	0	2	19	0.692226	0.941603	0.0261322
REACTOME_CONVERSION_FROM_APC_C:CDC20_TO_APC_C:CDH1_IN_LATE_ANAPHASE	0	2	19	0.692226	0.941603	0.0261322
REACTOME_SIGNALING_BY_HEDGEHOG	7	10	150	0.686563	0.941603	0.0261322	EVC:GLI2:ADCY2:ADCY4:ADCY1:ADCY5:SCUBE2
REACTOME_REGULATION_OF_TP53_ACTIVITY_THROUGH_METHYLATION	0	2	19	0.692226	0.941603	0.0261322
REACTOME_BIOSYNTHESIS_OF_THE_N_GLYCAN_PRECURSOR_DOLICHOL_LIPID_LINKED_OLIGOSACCHARIDE_LLO_AND_TRANSFER_TO_A_NASCENT_PROTEIN	3	5	78	0.697445	0.947842	0.0232639	ST3GAL6:ST6GALNAC1:ST8SIA6
REACTOME_NEGATIVE_REGULATION_OF_MAPK_PATHWAY	1	3	40	0.702281	0.953549	0.0206568	DUSP8
REACTOME_INHIBITION_OF_THE_PROTEOLYTIC_ACTIVITY_OF_APC_C_REQUIRED_FOR_THE_ONSET_OF_ANAPHASE_BY_MITOTIC_SPINDLE_CHECKPOINT_COMPONENTS	0	2	20	0.710752	0.958108	0.0185854
REACTOME_METABOLISM_OF_VITAMINS_AND_COFACTORS	9	12	189	0.706399	0.958108	0.0185854	LRP2:APOB:CUBN:ENPP2:PRKG2:HSPG2:ALDH1L1:AMN:CYP8B1
REACTOME_KINESINS	2	4	60	0.707719	0.958108	0.0185854	KIF19:TUBB8
REACTOME_LAGGING_STRAND_SYNTHESIS	0	2	20	0.710752	0.958108	0.0185854
REACTOME_REGULATED_NECROSIS	0	2	20	0.710752	0.958108	0.0185854
REACTOME_LISTERIA_MONOCYTOGENES_ENTRY_INTO_HOST_CELLS	0	2	20	0.710752	0.958108	0.0185854
REACTOME_REGULATION_OF_PTEN_GENE_TRANSCRIPTION	2	4	60	0.707719	0.958108	0.0185854	PPARG:JUN
REACTOME_CLASS_I_PEROXISOMAL_MEMBRANE_PROTEIN_IMPORT	0	2	20	0.710752	0.958108	0.0185854
REACTOME_DISEASES_OF_SIGNAL_TRANSDUCTION	20	24	386	0.714869	0.962793	0.0164669	HDAC9:ERBB3:FGFR2:FGFR3:FGF9:GAB1:VWF:FGF1:CD86:FN1:HEY2:STRA6:EGF:EGFR:TCF7L2:FGF17:KSR2:ERBB4:MAML2:ABCA4
REACTOME_PRE_NOTCH_EXPRESSION_AND_PROCESSING	5	8	118	0.720146	0.969029	0.0136631	ST3GAL6:NOTCH3:AC016586.1:JUN:MAML2
REACTOME_NEF_MEDIATES_DOWN_MODULATION_OF_CELL_SURFACE_RECEPTORS_BY_RECRUITING_THEM_TO_CLATHRIN_ADAPTERS	0	2	21	0.728164	0.971966	0.0123491
REACTOME_BETA_DEFENSINS	1	3	42	0.727612	0.971966	0.0123491	DEFB119
REACTOME_MITOCHONDRIAL_TRNA_AMINOACYLATION	0	2	21	0.728164	0.971966	0.0123491
REACTOME_ACTIVATION_OF_GENE_EXPRESSION_BY_SREBF_SREBP	1	3	42	0.727612	0.971966	0.0123491	HELZ2
REACTOME_PCNA_DEPENDENT_LONG_PATCH_BASE_EXCISION_REPAIR	0	2	21	0.728164	0.971966	0.0123491
REACTOME_ONCOGENIC_MAPK_SIGNALING	3	5	81	0.725378	0.971966	0.0123491	VWF:FN1:KSR2
REACTOME_TP53_REGULATES_TRANSCRIPTION_OF_ADDITIONAL_CELL_CYCLE_GENES_WHOSE_EXACT_ROLE_IN_THE_P53_PATHWAY_REMAIN_UNCERTAIN	0	2	21	0.728164	0.971966	0.0123491
REACTOME_NEGATIVE_REGULATION_OF_MET_ACTIVITY	0	2	21	0.728164	0.971966	0.0123491
REACTOME_ER_QUALITY_CONTROL_COMPARTMENT_ERQC	0	2	21	0.728164	0.971966	0.0123491
REACTOME_VESICLE_MEDIATED_TRANSPORT	39	44	723	0.734515	0.979571	0.00896392	STAB1:MSR1:RAB27B:SNAP91:SPTB:LRP2:APOB:TF:TJP1:DENND3:COL1A1:COL7A1:PRKAG3:SGIP1:RIN2:SPTBN5:EGF:SYT2:ANK2:CLVS2:EGFR:ANK3:DAB2:SPTBN4:PRKAA2:SPTA1:COL1A2:ST5:REPS2:DENND5B:SYT9:DENND2C:CD163:COL4A1:KIF19:SERPINA1:IGLV3-21:HBB:TUBB8
REACTOME_CELL_SURFACE_INTERACTIONS_AT_THE_VASCULAR_WALL	9	12	194	0.73644	0.981266	0.00821342	CD84:APOB:COL1A1:FN1:COL1A2:SELP:GAS6:SELL:IGLV3-21
REACTOME_PROTEIN_FOLDING	4	7	102	0.74154	0.981574	0.00807703	FKBP9:KIF13A:GNG4:GNAT3
REACTOME_CITRIC_ACID_CYCLE_TCA_CYCLE	0	2	22	0.744529	0.981574	0.00807703
REACTOME_REGULATION_OF_SIGNALING_BY_CBL	0	2	22	0.744529	0.981574	0.00807703
REACTOME_E2F_MEDIATED_REGULATION_OF_DNA_REPLICATION	0	2	22	0.744529	0.981574	0.00807703
REACTOME_MTORC1_MEDIATED_SIGNALLING	0	2	22	0.744529	0.981574	0.00807703
REACTOME_COMMON_PATHWAY_OF_FIBRIN_CLOT_FORMATION	0	2	22	0.744529	0.981574	0.00807703
REACTOME_CYTOSOLIC_SENSORS_OF_PATHOGEN_ASSOCIATED_DNA	2	4	63	0.738549	0.981574	0.00807703	DTX4:ZBP1
REACTOME_NOTCH2_ACTIVATION_AND_TRANSMISSION_OF_SIGNAL_TO_THE_NUCLEUS	0	2	22	0.744529	0.981574	0.00807703
REACTOME_PINK_PARKIN_MEDIATED_MITOPHAGY	0	2	22	0.744529	0.981574	0.00807703
REACTOME_TNF_SIGNALING	1	3	43	0.739578	0.981574	0.00807703	SMPD3
REACTOME_PEROXISOMAL_PROTEIN_IMPORT	2	4	63	0.738549	0.981574	0.00807703	DAO:AGXT
REACTOME_INSERTION_OF_TAIL_ANCHORED_PROTEINS_INTO_THE_ENDOPLASMIC_RETICULUM_MEMBRANE	0	2	22	0.744529	0.981574	0.00807703
REACTOME_TCF_DEPENDENT_SIGNALING_IN_RESPONSE_TO_WNT	11	14	232	0.745399	0.981857	0.00795157	HECW1:SOX6:LGR6:SOX3:LGR5:WNT9A:TCF7L2:DACT1:CXXC4:TCF4:LGR4
REACTOME_PI_METABOLISM	3	6	84	0.751347	0.987956	0.00526247	MTMR7:PNPLA7:PTPN13
REACTOME_TP53_REGULATES_METABOLIC_GENES	3	6	84	0.751347	0.987956	0.00526247	TP63:PRKAG3:PRKAA2
REACTOME_TRANSLOCATION_OF_ZAP_70_TO_IMMUNOLOGICAL_SYNAPSE	0	2	23	0.759911	0.993118	0.00299902
REACTOME_POST_CHAPERONIN_TUBULIN_FOLDING_PATHWAY	0	2	23	0.759911	0.993118	0.00299902
REACTOME_ABORTIVE_ELONGATION_OF_HIV_1_TRANSCRIPT_IN_THE_ABSENCE_OF_TAT	0	2	23	0.759911	0.993118	0.00299902
REACTOME_APC_C:CDC20_MEDIATED_DEGRADATION_OF_CYCLIN_B	0	2	23	0.759911	0.993118	0.00299902
REACTOME_METABOLISM_OF_WATER_SOLUBLE_VITAMINS_AND_COFACTORS	5	8	123	0.756312	0.993118	0.00299902	CUBN:ENPP2:ALDH1L1:AMN:CYP8B1
REACTOME_RNA_POLYMERASE_III_TRANSCRIPTION_TERMINATION	0	2	23	0.759911	0.993118	0.00299902
REACTOME_NUCLEOTIDE_SALVAGE	0	2	23	0.759911	0.993118	0.00299902
REACTOME_GLYCOSPHINGOLIPID_METABOLISM	1	3	45	0.762167	0.995199	0.00209007	SMPD3
REACTOME_TRANSLATION	0	18	295	1	1	0
REACTOME_ACTIVATION_OF_THE_PRE_REPLICATIVE_COMPLEX	0	2	33	0.871015	1	0
REACTOME_BASE_EXCISION_REPAIR	0	6	91	0.99653	1	0
REACTOME_SIGNALING_BY_RHO_GTPASES	19	28	450	0.941931	1	0	ARHGAP6:MYLK:NGEF:ARHGEF10L:PAK3:ARHGAP28:MYH14:ARHGAP22:ARHGEF16:ARHGAP29:ARHGAP24:FGD4:S100A8:TIAM2:S100A9:CYBB:ARHGEF40:KLK2:TUBB8
REACTOME_METABOLISM_OF_NON_CODING_RNA	0	4	54	0.965083	1	0
REACTOME_SIGNALING_BY_SCF_KIT	0	3	43	0.930746	1	0
REACTOME_CROSS_PRESENTATION_OF_SOLUBLE_EXOGENOUS_ANTIGENS_ENDOSOMES	0	4	50	0.955205	1	0
REACTOME_ANTIGEN_PROCESSING_CROSS_PRESENTATION	2	6	99	0.94198	1	0	TLR4:CYBB
REACTOME_MEIOSIS	2	8	117	0.974843	1	0	SYNE2:SPO11
REACTOME_G0_AND_EARLY_G1	0	2	27	0.812729	1	0
REACTOME_TRANS_GOLGI_NETWORK_VESICLE_BUDDING	1	5	72	0.935935	1	0	CLVS2
REACTOME_RESOLUTION_OF_AP_SITES_VIA_THE_MULTIPLE_NUCLEOTIDE_PATCH_REPLACEMENT_PATHWAY	0	2	25	0.787956	1	0
REACTOME_CELL_CYCLE	5	39	642	1	1	0	SYNE2:SPO11:CDKN1C:CDKN2A:TUBB8
REACTOME_ORC1_REMOVAL_FROM_CHROMATIN	0	5	71	0.9879	1	0
REACTOME_ANTIVIRAL_MECHANISM_BY_IFN_STIMULATED_GENES	0	5	82	0.99391	1	0
REACTOME_SPHINGOLIPID_DE_NOVO_BIOSYNTHESIS	0	3	44	0.934924	1	0
REACTOME_DEFENSINS	1	4	52	0.828311	1	0	DEFB119
REACTOME_SRP_DEPENDENT_COTRANSLATIONAL_PROTEIN_TARGETING_TO_MEMBRANE	0	7	113	0.999124	1	0
REACTOME_MITOCHONDRIAL_PROTEIN_IMPORT	0	4	65	0.982408	1	0
REACTOME_SIGNALING_BY_NOTCH4	2	5	82	0.877878	1	0	HEY2:MAML2
REACTOME_DOWNSTREAM_SIGNALING_EVENTS_OF_B_CELL_RECEPTOR_BCR	0	5	81	0.993518	1	0
REACTOME_ACTIVATION_OF_NF_KAPPAB_IN_B_CELLS	0	5	67	0.984471	1	0
REACTOME_SIGNALING_BY_THE_B_CELL_RECEPTOR_BCR	1	10	166	0.99963	1	0	IGLV3-21
REACTOME_PHOSPHOLIPID_METABOLISM	8	13	211	0.894288	1	0	MTMR7:PNPLA7:SLC44A5:PLA2R1:CDS1:PTPN13:DGAT2L6:LIPI
REACTOME_SYNTHESIS_OF_PIPS_AT_THE_PLASMA_MEMBRANE	1	4	53	0.836277	1	0	PTPN13
REACTOME_MHC_CLASS_II_ANTIGEN_PRESENTATION	1	8	124	0.996033	1	0	TUBB8
REACTOME_GLYCEROPHOSPHOLIPID_BIOSYNTHESIS	5	8	128	0.788942	1	0	SLC44A5:PLA2R1:CDS1:DGAT2L6:LIPI
REACTOME_CDK_MEDIATED_PHOSPHORYLATION_AND_REMOVAL_OF_CDC6	0	5	72	0.988632	1	0
REACTOME_MICRORNA_MIRNA_BIOGENESIS	0	2	25	0.787956	1	0
REACTOME_PROCESSING_OF_CAPPED_INTRON_CONTAINING_PRE_MRNA	0	15	242	1	1	0
REACTOME_TCR_SIGNALING	1	8	122	0.995568	1	0	PAK3
REACTOME_DOWNSTREAM_TCR_SIGNALING	0	7	101	0.998143	1	0
REACTOME_BASIGIN_INTERACTIONS	0	2	25	0.787956	1	0
REACTOME_ACTIVATION_OF_THE_MRNA_UPON_BINDING_OF_THE_CAP_BINDING_COMPLEX_AND_EIFS_AND_SUBSEQUENT_BINDING_TO_43S	0	4	60	0.975974	1	0
REACTOME_PHOSPHORYLATION_OF_CD3_AND_TCR_ZETA_CHAINS	0	2	26	0.800726	1	0
REACTOME_GENERIC_TRANSCRIPTION_PATHWAY	60	74	1218	0.950615	1	0	HDAC9:SPI1:TP63:GLI2:NOTCH3:RBFOX1:MEF2C:ZNF416:NLRC4:HNF4A:TJP1:ZNF419:COL1A1:PPARGC1A:PRKAG3:NR5A2:GRIA2:ZNF549:PCK1:LGALS3:ZNF20:PPARG:BTG1:HEY2:SKIL:TFAP2A:SMAD6:EGFR:IGFBP3:CDKN2A:TCF7L2:THRB:ABCA6:TRIM63:AUTS2:ZNF222:TAL1:PRKAA2:TP53INP1:ZNF610:ZNF528:MOBP:SMAD1:NPPA:TGIF1:JUN:ZNF454:MAF:ZNF571:MAML2:ZNF529:ZNF555:ZNF667:ZNF521:RORB:PLXNA4:TWIST2:ZNF550:GRIN2B:PCGF2
REACTOME_TRANSPORT_OF_MATURE_TRANSCRIPT_TO_CYTOPLASM	0	6	84	0.994626	1	0
REACTOME_METABOLISM_OF_AMINO_ACIDS_AND_DERIVATIVES	9	23	372	0.999204	1	0	IYD:DCT:DAO:DBH:SDSL:DUOX2:GADL1:ASPG:AGXT
REACTOME_REGULATION_OF_APOPTOSIS	0	4	53	0.962839	1	0
REACTOME_GLYCOLYSIS	1	5	72	0.935935	1	0	PGK2
REACTOME_MRNA_CAPPING	0	2	29	0.834612	1	0
REACTOME_METABOLISM_OF_POLYAMINES	0	4	59	0.974429	1	0
REACTOME_CELL_CYCLE_MITOTIC	3	33	536	1	1	0	CDKN1C:CDKN2A:TUBB8
REACTOME_CYTOSOLIC_TRNA_AMINOACYLATION	0	2	24	0.774368	1	0
REACTOME_CHEMOKINE_RECEPTORS_BIND_CHEMOKINES	1	3	48	0.792858	1	0	CCR1
REACTOME_CELL_CYCLE_CHECKPOINTS	1	18	291	1	1	0	CDKN2A
REACTOME_TRNA_AMINOACYLATION	0	3	42	0.9263	1	0
REACTOME_OLFACTORY_SIGNALING_PATHWAY	4	24	399	1	1	0	OR14K1:OR10R2:OR5V1:OR52R1
REACTOME_RECRUITMENT_OF_NUMA_TO_MITOTIC_CENTROSOMES	1	6	94	0.979676	1	0	TUBB8
REACTOME_PREFOLDIN_MEDIATED_TRANSFER_OF_SUBSTRATE_TO_CCT_TRIC	0	2	28	0.82401	1	0
REACTOME_FORMATION_OF_TUBULIN_FOLDING_INTERMEDIATES_BY_CCT_TRIC	0	2	26	0.800726	1	0
REACTOME_METABOLISM_OF_NUCLEOTIDES	1	6	99	0.984448	1	0	UPB1
REACTOME_DOWNSTREAM_SIGNAL_TRANSDUCTION	0	2	29	0.834612	1	0
REACTOME_MRNA_SPLICING	0	12	188	0.999992	1	0
REACTOME_MRNA_SPLICING_MINOR_PATHWAY	0	4	52	0.960451	1	0
REACTOME_PROCESSING_OF_CAPPED_INTRONLESS_PRE_MRNA	0	2	28	0.82401	1	0
REACTOME_NUCLEOTIDE_EXCISION_REPAIR	0	7	110	0.998943	1	0
REACTOME_FANCONI_ANEMIA_PATHWAY	0	3	39	0.911179	1	0
REACTOME_SPHINGOLIPID_METABOLISM	1	6	89	0.973498	1	0	SMPD3
REACTOME_G_ALPHA_S_SIGNALLING_EVENTS	17	33	541	0.99865	1	0	ADCY2:ADCYAP1R1:PDE10A:CRHR1:ADCY4:OR14K1:GPR15:PTH1R:ADCY1:GNG4:RXFP1:ADCY5:MC2R:OR10R2:GNAT3:OR5V1:OR52R1
REACTOME_COSTIMULATION_BY_THE_CD28_FAMILY	2	5	73	0.822945	1	0	PAK3:CD86
REACTOME_GOLGI_ASSOCIATED_VESICLE_BIOGENESIS	0	4	56	0.969173	1	0
REACTOME_DEADENYLATION_OF_MRNA	0	2	25	0.787956	1	0
REACTOME_DEADENYLATION_DEPENDENT_MRNA_DECAY	0	4	56	0.969173	1	0
REACTOME_METABOLISM_OF_RNA	1	41	672	1	1	0	A1CF
REACTOME_MITOTIC_G1_G1_S_PHASES	2	9	149	0.994786	1	0	CDKN1C:CDKN2A
REACTOME_REGULATION_OF_MITOTIC_CELL_CYCLE	0	6	86	0.995257	1	0
REACTOME_MITOTIC_G2_G2_M_PHASES	1	12	199	0.999945	1	0	TUBB8
REACTOME_DNA_REPAIR	2	20	331	1	1	0	EYA2:AC016586.1
REACTOME_POST_TRANSLATIONAL_PROTEIN_MODIFICATION	60	86	1429	0.9992	1	0	RAB27B:ST3GAL6:SPTB:ST6GALNAC1:SEMA5B:APOB:ADAMTS2:LAMB1:TF:CST3:PPARGC1A:MDGA1:SEMA5A:CNTN3:COL7A1:FN1:NR5A2:MUC5B:HIF3A:BMP4:PPARG:LAMC1:ADAMTS7:TFAP2A:SPTBN5:TTLL7:ADAMTS17:ADAMTS18:CNTN4:ANK2:IGFBP3:CDKN2A:ST8SIA6:THRB:ANK3:ADAMTS12:ADAMTSL3:SPTBN4:NTNG1:SPTA1:ADAMTS9:ASB5:NOD2:SMAD1:TTLL6:SPSB1:MUCL1:GALNTL6:MUC16:MGAT4C:GAS6:AGBL4:MITF:THSD4:NTNG2:SERPINA1:SSPO:MUC5AC:TUBB8:PCGF2
REACTOME_CHROMOSOME_MAINTENANCE	0	7	109	0.998875	1	0
REACTOME_RECYCLING_PATHWAY_OF_L1	1	3	48	0.792858	1	0	TUBB8
REACTOME_RESPIRATORY_ELECTRON_TRANSPORT	0	6	99	0.997896	1	0
REACTOME_ASPARAGINE_N_LINKED_GLYCOSYLATION	13	19	304	0.881569	1	0	ST3GAL6:SPTB:ST6GALNAC1:COL7A1:SPTBN5:ANK2:ST8SIA6:ANK3:SPTBN4:SPTA1:MGAT4C:SERPINA1:TUBB8
REACTOME_ASSEMBLY_OF_THE_PRE_REPLICATIVE_COMPLEX	0	5	68	0.985409	1	0
REACTOME_CALNEXIN_CALRETICULIN_CYCLE	0	2	26	0.800726	1	0
REACTOME_N_GLYCAN_TRIMMING_IN_THE_ER_AND_CALNEXIN_CALRETICULIN_CYCLE	0	3	35	0.886095	1	0
REACTOME_TRAF6_MEDIATED_IRF7_ACTIVATION	0	2	29	0.834612	1	0
REACTOME_FACTORS_INVOLVED_IN_MEGAKARYOCYTE_DEVELOPMENT_AND_PLATELET_PRODUCTION	6	11	167	0.881597	1	0	DOCK4:DOCK5:KIF19:HBG2:HBB:TUBB8
REACTOME_REGULATION_OF_MRNA_STABILITY_BY_PROTEINS_THAT_BIND_AU_RICH_ELEMENTS	0	6	87	0.995544	1	0
REACTOME_INTERFERON_GAMMA_SIGNALING	3	6	93	0.817939	1	0	GBP3:TRIM29:NCAM1
REACTOME_INTERFERON_ALPHA_BETA_SIGNALING	0	5	70	0.987121	1	0
REACTOME_REGULATION_OF_IFNA_SIGNALING	0	2	26	0.800726	1	0
REACTOME_INTERFERON_SIGNALING	3	13	202	0.998464	1	0	GBP3:TRIM29:NCAM1
REACTOME_FORMATION_OF_INCISION_COMPLEX_IN_GG_NER	0	3	43	0.930746	1	0
REACTOME_ENDOSOMAL_SORTING_COMPLEX_REQUIRED_FOR_TRANSPORT_ESCRT	0	2	31	0.853941	1	0
REACTOME_MEIOTIC_RECOMBINATION	1	6	85	0.967286	1	0	SPO11
REACTOME_SIGNALING_BY_NOTCH	11	15	244	0.802963	1	0	HDAC9:ST3GAL6:NOTCH3:AC016586.1:DTX4:HEY2:EGF:EGFR:JUN:MAML2:PBX1
REACTOME_DNA_REPLICATION	0	8	127	0.999636	1	0
REACTOME_HIV_INFECTION	0	15	234	1	1	0
REACTOME_HIV_LIFE_CYCLE	0	10	152	0.999924	1	0
REACTOME_HOST_INTERACTIONS_OF_HIV_FACTORS	0	8	131	0.999717	1	0
REACTOME_VIRAL_MESSENGER_RNA_SYNTHESIS	0	3	44	0.934924	1	0
REACTOME_INTERACTIONS_OF_VPR_WITH_HOST_CELLULAR_PROTEINS	0	3	37	0.899415	1	0
REACTOME_ACTIVATION_OF_ATR_IN_RESPONSE_TO_REPLICATION_STRESS	0	3	37	0.899415	1	0
REACTOME_MITOTIC_PROMETAPHASE	1	12	198	0.999942	1	0	TUBB8
REACTOME_G1_S_SPECIFIC_TRANSCRIPTION	0	2	29	0.834612	1	0
REACTOME_GLUCOSE_METABOLISM	3	6	92	0.811342	1	0	PCK1:SLC37A2:PGK2
REACTOME_ADAPTIVE_IMMUNE_SYSTEM	28	49	811	0.999544	1	0	COL17A1:PAK3:LILRB1:ICAM5:COL1A1:CRTAM:TREML2:CD86:LILRB2:TLR4:COL2A1:CD96:TRIM63:ASB5:COL1A2:CYBB:BTNL9:SPSB1:CD300E:LILRA5:SELL:KIR2DL4:NCR1:SH2D1B:FCGR3A:IGLV3-21:LILRA2:TUBB8
REACTOME_MEIOTIC_SYNAPSIS	1	5	79	0.955276	1	0	SYNE2
REACTOME_CLASS_I_MHC_MEDIATED_ANTIGEN_PROCESSING_PRESENTATION	5	23	370	0.999994	1	0	TLR4:TRIM63:ASB5:CYBB:SPSB1
REACTOME_TELOMERE_MAINTENANCE	0	5	82	0.99391	1	0
REACTOME_CREATION_OF_C4_AND_C2_ACTIVATORS	1	5	71	0.932595	1	0	IGLV3-21
REACTOME_APC_CDC20_MEDIATED_DEGRADATION_OF_NEK2A	0	2	25	0.787956	1	0
REACTOME_INITIAL_TRIGGERING_OF_COMPLEMENT	1	5	79	0.955276	1	0	IGLV3-21
REACTOME_EXTENSION_OF_TELOMERES	0	2	30	0.844576	1	0
REACTOME_G2_M_CHECKPOINTS	0	11	168	0.999972	1	0
REACTOME_G2_M_DNA_DAMAGE_CHECKPOINT	0	6	95	0.997298	1	0
REACTOME_S_PHASE	0	10	161	0.999957	1	0
REACTOME_DNA_STRAND_ELONGATION	0	2	32	0.862743	1	0
REACTOME_CHOLESTEROL_BIOSYNTHESIS	0	2	25	0.787956	1	0
REACTOME_VIF_MEDIATED_DEGRADATION_OF_APOBEC3G	0	4	54	0.965083	1	0
REACTOME_TRANSLESION_SYNTHESIS_BY_Y_FAMILY_DNA_POLYMERASES_BYPASSES_LESIONS_ON_DNA_TEMPLATE	0	3	39	0.911179	1	0
REACTOME_RECOGNITION_OF_DNA_DAMAGE_BY_PCNA_CONTAINING_REPLICATION_COMPLEX	0	2	30	0.844576	1	0
REACTOME_FORMATION_OF_THE_EARLY_ELONGATION_COMPLEX	0	2	33	0.871015	1	0
REACTOME_CELLULAR_RESPONSE_TO_HYPOXIA	2	5	75	0.836718	1	0	HIF3A:EGLN3
REACTOME_INTERLEUKIN_7_SIGNALING	0	3	34	0.878789	1	0
REACTOME_THE_CITRIC_ACID_TCA_CYCLE_AND_RESPIRATORY_ELECTRON_TRANSPORT	2	11	173	0.998484	1	0	PDK4:ME1
REACTOME_REPRODUCTION	4	9	143	0.936696	1	0	SYNE2:SPO11:SPAM1:CATSPERD
REACTOME_TRANSPORT_OF_THE_SLBP_DEPENDANT_MATURE_MRNA	0	3	36	0.892962	1	0
REACTOME_TRANSPORT_OF_MATURE_MRNAS_DERIVED_FROM_INTRONLESS_TRANSCRIPTS	0	3	43	0.930746	1	0
REACTOME_BUDDING_AND_MATURATION_OF_HIV_VIRION	0	2	28	0.82401	1	0
REACTOME_RESPIRATORY_ELECTRON_TRANSPORT_ATP_SYNTHESIS_BY_CHEMIOSMOTIC_COUPLING_AND_HEAT_PRODUCTION_BY_UNCOUPLING_PROTEINS	0	8	122	0.999502	1	0
REACTOME_MACROAUTOPHAGY	2	6	90	0.913421	1	0	PRKAG3:PRKAA2
REACTOME_TRIGLYCERIDE_CATABOLISM	0	2	24	0.774368	1	0
REACTOME_THE_ROLE_OF_NEF_IN_HIV_1_REPLICATION_AND_DISEASE_PATHOGENESIS	0	2	28	0.82401	1	0
REACTOME_REGULATION_OF_CHOLESTEROL_BIOSYNTHESIS_BY_SREBP_SREBF	1	4	55	0.851214	1	0	HELZ2
REACTOME_FORMATION_OF_HIV_ELONGATION_COMPLEX_IN_THE_ABSENCE_OF_HIV_TAT	0	3	48	0.949266	1	0
REACTOME_TRANSCRIPTION_OF_THE_HIV_GENOME	0	5	73	0.989319	1	0
REACTOME_HIV_ELONGATION_ARREST_AND_RECOVERY	0	3	36	0.892962	1	0
REACTOME_HOST_INTERACTIONS_WITH_INFLUENZA_FACTORS	0	3	43	0.930746	1	0
REACTOME_INFLUENZA_INFECTION	0	10	156	0.999941	1	0
REACTOME_EXPORT_OF_VIRAL_RIBONUCLEOPROTEINS_FROM_NUCLEUS	0	2	33	0.871015	1	0
REACTOME_DDX58_IFIH1_MEDIATED_INDUCTION_OF_INTERFERON_ALPHA_BETA	1	5	78	0.952903	1	0	S100A12
REACTOME_APC_C:CDH1_MEDIATED_DEGRADATION_OF_CDC20_AND_OTHER_APC_C:CDH1_TARGETED_PROTEINS_IN_LATE_MITOSIS_EARLY_G1	0	5	72	0.988632	1	0
REACTOME_TELOMERE_C_STRAND_LAGGING_STRAND_SYNTHESIS	0	2	24	0.774368	1	0
REACTOME_ACTIVATION_OF_APC_C_AND_APC_C:CDC20_MEDIATED_DEGRADATION_OF_MITOTIC_PROTEINS	0	5	76	0.991143	1	0
REACTOME_INTERACTIONS_OF_REV_WITH_HOST_CELLULAR_PROTEINS	0	3	37	0.899415	1	0
REACTOME_NUCLEAR_IMPORT_OF_REV_PROTEIN	0	3	34	0.878789	1	0
REACTOME_ORGANELLE_BIOGENESIS_AND_MAINTENANCE	10	18	295	0.970814	1	0	CC2D2A:CNGB1:MEF2C:PPARGC1A:PRKAG3:HELZ2:PRKAA2:LZTFL1:CNGA2:TUBB8
REACTOME_SCF_SKP2_MEDIATED_DEGRADATION_OF_P27_P21	0	4	60	0.975974	1	0
REACTOME_DEGRADATION_OF_BETA_CATENIN_BY_THE_DESTRUCTION_COMPLEX	1	6	84	0.965526	1	0	TCF7L2
REACTOME_RHO_GTPASE_EFFECTORS	8	20	321	0.997667	1	0	MYLK:PAK3:MYH14:S100A8:S100A9:CYBB:KLK2:TUBB8
REACTOME_FORMATION_OF_THE_BETA_CATENIN:TCF_TRANSACTIVATING_COMPLEX	2	6	90	0.913421	1	0	TCF7L2:TCF4
REACTOME_FCGAMMA_RECEPTOR_FCGR_DEPENDENT_PHAGOCYTOSIS	4	9	143	0.936696	1	0	FGR:MYH2:FCGR3A:IGLV3-21
REACTOME_REGULATION_OF_ACTIN_DYNAMICS_FOR_PHAGOCYTIC_CUP_FORMATION	3	8	118	0.93	1	0	MYH2:FCGR3A:IGLV3-21
REACTOME_ROLE_OF_PHOSPHOLIPIDS_IN_PHAGOCYTOSIS	2	5	82	0.877878	1	0	FCGR3A:IGLV3-21
REACTOME_COPII_MEDIATED_VESICLE_TRANSPORT	2	5	68	0.784133	1	0	COL7A1:SERPINA1
REACTOME_GENE_SILENCING_BY_RNA	0	9	136	0.999793	1	0
REACTOME_EPIGENETIC_REGULATION_OF_GENE_EXPRESSION	0	9	146	0.99989	1	0
REACTOME_PRC2_METHYLATES_HISTONES_AND_DNA	0	5	71	0.9879	1	0
REACTOME_CELLULAR_RESPONSES_TO_STRESS	8	27	440	0.999986	1	0	HIF3A:EGLN3:HSPA12B:CDKN2A:CYBB:JUN:NOX5:TUBB8
REACTOME_CONDENSATION_OF_PROPHASE_CHROMOSOMES	0	5	72	0.988632	1	0
REACTOME_SELENOAMINO_ACID_METABOLISM	0	8	118	0.99936	1	0
REACTOME_DAP12_SIGNALING	0	2	29	0.834612	1	0
REACTOME_FC_EPSILON_RECEPTOR_FCERI_SIGNALING	2	12	186	0.999235	1	0	JUN:IGLV3-21
REACTOME_RESOLUTION_OF_SISTER_CHROMATID_COHESION	1	8	125	0.996247	1	0	TUBB8
REACTOME_MITOTIC_METAPHASE_AND_ANAPHASE	1	13	201	0.999951	1	0	TUBB8
REACTOME_OXIDATIVE_STRESS_INDUCED_SENESCENCE	2	8	124	0.982016	1	0	CDKN2A:JUN
REACTOME_SENESCENCE_ASSOCIATED_SECRETORY_PHENOTYPE_SASP	2	7	108	0.961591	1	0	CDKN2A:JUN
REACTOME_CELLULAR_SENESCENCE	2	12	194	0.9995	1	0	CDKN2A:JUN
REACTOME_DNA_DAMAGE_TELOMERE_STRESS_INDUCED_SENESCENCE	0	5	80	0.9931	1	0
REACTOME_REGULATION_OF_PLK1_ACTIVITY_AT_G2_M_TRANSITION	0	6	87	0.995544	1	0
REACTOME_ROLE_OF_LAT2_NTAL_LAB_ON_CALCIUM_MOBILIZATION	1	5	71	0.932595	1	0	IGLV3-21
REACTOME_FCERI_MEDIATED_MAPK_ACTIVATION	2	6	87	0.901364	1	0	JUN:IGLV3-21
REACTOME_FCERI_MEDIATED_CAPLUS2_MOBILIZATION	1	6	86	0.968959	1	0	IGLV3-21
REACTOME_FCERI_MEDIATED_NF_KB_ACTIVATION	1	9	136	0.997969	1	0	IGLV3-21
REACTOME_NUCLEAR_ENVELOPE_BREAKDOWN	0	4	53	0.962839	1	0
REACTOME_SUMOYLATION	8	12	187	0.798956	1	0	PPARGC1A:NR5A2:PPARG:TFAP2A:CDKN2A:THRB:MITF:PCGF2
REACTOME_SUMOYLATION_OF_DNA_DAMAGE_RESPONSE_AND_REPAIR_PROTEINS	2	5	77	0.849559	1	0	CDKN2A:PCGF2
REACTOME_HDACS_DEACETYLATE_HISTONES	0	6	92	0.99674	1	0
REACTOME_PKMTS_METHYLATE_HISTONE_LYSINES	1	5	69	0.925414	1	0	PRDM16
REACTOME_HDMS_DEMETHYLATE_HISTONES	0	3	48	0.949266	1	0
REACTOME_HATS_ACETYLATE_HISTONES	0	9	140	0.999839	1	0
REACTOME_RMTS_METHYLATE_HISTONE_ARGININES	0	5	77	0.991679	1	0
REACTOME_SUMOYLATION_OF_UBIQUITINYLATION_PROTEINS	0	3	39	0.911179	1	0
REACTOME_NUCLEAR_PORE_COMPLEX_NPC_DISASSEMBLY	0	3	36	0.892962	1	0
REACTOME_REGULATION_OF_HSF1_MEDIATED_HEAT_SHOCK_RESPONSE	1	5	82	0.96173	1	0	HSPA12B
REACTOME_HSP90_CHAPERONE_CYCLE_FOR_STEROID_HORMONE_RECEPTORS_SHR	1	4	56	0.858208	1	0	TUBB8
REACTOME_HSF1_ACTIVATION	0	2	31	0.853941	1	0
REACTOME_CELLULAR_RESPONSE_TO_HEAT_STRESS	1	7	101	0.986035	1	0	HSPA12B
REACTOME_ATTENUATION_PHASE	0	2	28	0.82401	1	0
REACTOME_HSF1_DEPENDENT_TRANSACTIVATION	0	3	38	0.90548	1	0
REACTOME_TRANSCRIPTIONAL_REGULATION_BY_TP53	8	22	363	0.999584	1	0	TP63:NLRC4:PRKAG3:IGFBP3:CDKN2A:PRKAA2:TP53INP1:JUN
REACTOME_SIGNALING_BY_ROBO_RECEPTORS	4	14	218	0.997362	1	0	PAK3:SLIT2:SLIT3:COL4A5
REACTOME_CENTROSOME_MATURATION	0	5	81	0.993518	1	0
REACTOME_IRE1ALPHA_ACTIVATES_CHAPERONES	0	4	50	0.955205	1	0
REACTOME_UNFOLDED_PROTEIN_RESPONSE_UPR	1	6	91	0.97616	1	0	CCL2
REACTOME_BETA_CATENIN_INDEPENDENT_WNT_SIGNALING	5	9	145	0.875209	1	0	WNT11:PRKG2:PRICKLE1:TCF7L2:GNG4
REACTOME_PD_1_SIGNALING	0	2	27	0.812729	1	0
REACTOME_COOPERATION_OF_PREFOLDIN_AND_TRIC_CCT_IN_ACTIN_AND_TUBULIN_FOLDING	0	2	33	0.871015	1	0
REACTOME_SUMOYLATION_OF_SUMOYLATION_PROTEINS	0	3	35	0.886095	1	0
REACTOME_PCP_CE_PATHWAY	2	6	92	0.920699	1	0	WNT11:PRICKLE1
REACTOME_SIRT1_NEGATIVELY_REGULATES_RRNA_EXPRESSION	0	4	66	0.983471	1	0
REACTOME_ERCC6_CSB_AND_EHMT2_G9A_POSITIVELY_REGULATE_RRNA_EXPRESSION	0	5	74	0.989965	1	0
REACTOME_INTERLEUKIN_12_FAMILY_SIGNALING	1	4	57	0.8649	1	0	IL12A
REACTOME_AUF1_HNRNP_D0_BINDS_AND_DESTABILIZES_MRNA	0	4	55	0.967191	1	0
REACTOME_INTERLEUKIN_2_FAMILY_SIGNALING	0	3	44	0.934924	1	0
REACTOME_SUMOYLATION_OF_CHROMATIN_ORGANIZATION_PROTEINS	1	5	71	0.932595	1	0	PCGF2
REACTOME_SUMOYLATION_OF_RNA_BINDING_PROTEINS	1	3	47	0.783038	1	0	PCGF2
REACTOME_ASYMMETRIC_LOCALIZATION_OF_PCP_PROTEINS	1	4	64	0.904187	1	0	PRICKLE1
REACTOME_SUMOYLATION_OF_DNA_REPLICATION_PROTEINS	0	3	46	0.94254	1	0
REACTOME_DEGRADATION_OF_AXIN	0	4	55	0.967191	1	0
REACTOME_DISASSEMBLY_OF_THE_DESTRUCTION_COMPLEX_AND_RECRUITMENT_OF_AXIN_TO_THE_MEMBRANE	0	2	31	0.853941	1	0
REACTOME_CHROMATIN_ORGANIZATION	2	17	272	0.999993	1	0	PADI2:PRDM16
REACTOME_INTERCONVERSION_OF_NUCLEOTIDE_DI_AND_TRIPHOSPHATES	0	2	29	0.834612	1	0
REACTOME_INTERLEUKIN_3_INTERLEUKIN_5_AND_GM_CSF_SIGNALING	0	3	48	0.949266	1	0
REACTOME_MITOPHAGY	0	2	29	0.834612	1	0
REACTOME_MISCELLANEOUS_TRANSPORT_AND_BINDING_EVENTS	0	2	26	0.800726	1	0
REACTOME_POSITIVE_EPIGENETIC_REGULATION_OF_RRNA_EXPRESSION	0	7	104	0.998461	1	0
REACTOME_NEGATIVE_EPIGENETIC_REGULATION_OF_RRNA_EXPRESSION	0	7	107	0.998725	1	0
REACTOME_DNA_METHYLATION	0	4	63	0.980071	1	0
REACTOME_REGULATION_OF_TNFR1_SIGNALING	0	2	33	0.871015	1	0
REACTOME_TNFR1_INDUCED_NFKAPPAB_SIGNALING_PATHWAY	0	2	30	0.844576	1	0
REACTOME_HEDGEHOG_LIGAND_BIOGENESIS	1	4	65	0.90884	1	0	SCUBE2
REACTOME_MITOCHONDRIAL_TRANSLATION	0	6	96	0.997461	1	0
REACTOME_METABOLISM_OF_LIPIDS	37	45	738	0.865137	1	0	MTMR7:ABCB4:ALOX5:CYP46A1:ME1:LRP2:SMPD3:ACSBG1:PTGDS:CUBN:ALOX12:ABCC3:PPARGC1A:ACADL:HELZ2:PNPLA7:PPARG:CYP27A1:CYP19A1:SLC44A5:CYP1B1:GLIPR1:DPEP3:TIAM2:PLA2R1:PRKAA2:CDS1:PTPN13:ABCA1:FAAH2:ARNT2:ACOT12:CYP8B1:DGAT2L6:LIPI:THEM5:ACOT6
REACTOME_TRANSCRIPTIONAL_REGULATION_BY_SMALL_RNAS	0	7	105	0.998554	1	0
REACTOME_PIWI_INTERACTING_RNA_PIRNA_BIOGENESIS	0	2	29	0.834612	1	0
REACTOME_DECTIN_1_MEDIATED_NONCANONICAL_NF_KB_SIGNALING	0	4	62	0.97879	1	0
REACTOME_CLEC7A_DECTIN_1_SIGNALING	0	7	100	0.998023	1	0
REACTOME_DEGRADATION_OF_GLI1_BY_THE_PROTEASOME	0	4	60	0.975974	1	0
REACTOME_CILIUM_ASSEMBLY	5	13	201	0.983888	1	0	CC2D2A:CNGB1:LZTFL1:CNGA2:TUBB8
REACTOME_DEFECTIVE_TPR_MAY_CONFER_SUSCEPTIBILITY_TOWARDS_THYROID_PAPILLARY_CARCINOMA_TPC	0	2	32	0.862743	1	0
REACTOME_ANCHORING_OF_THE_BASAL_BODY_TO_THE_PLASMA_MEMBRANE	1	6	97	0.982686	1	0	CC2D2A
REACTOME_INTRAFLAGELLAR_TRANSPORT	0	4	54	0.965083	1	0
REACTOME_C_TYPE_LECTIN_RECEPTORS_CLRS	5	9	140	0.853539	1	0	PAK3:MUC5B:MUCL1:MUC16:MUC5AC
REACTOME_RHO_GTPASES_ACTIVATE_PKNS	2	6	92	0.920699	1	0	MYH14:KLK2
REACTOME_ACTIVATED_PKN1_STIMULATES_TRANSCRIPTION_OF_AR_ANDROGEN_RECEPTOR_REGULATED_GENES_KLK2_AND_KLK3	1	4	65	0.90884	1	0	KLK2
REACTOME_HEDGEHOG_ON_STATE	2	6	86	0.89702	1	0	EVC:GLI2
REACTOME_REGULATION_OF_TP53_ACTIVITY	5	10	160	0.924723	1	0	TP63:PRKAG3:CDKN2A:PRKAA2:TP53INP1
REACTOME_TERMINATION_OF_TRANSLESION_DNA_SYNTHESIS	0	2	32	0.862743	1	0
REACTOME_REGULATION_OF_RAS_BY_GAPS	0	5	68	0.985409	1	0
REACTOME_DISEASES_OF_CARBOHYDRATE_METABOLISM	0	3	34	0.878789	1	0
REACTOME_INFECTIOUS_DISEASE	5	23	382	0.999997	1	0	LTF:SV2C:SYT2:ANTXR2:SV2B
REACTOME_RHO_GTPASES_ACTIVATE_WASPS_AND_WAVES	0	3	36	0.892962	1	0
REACTOME_RHO_GTPASES_ACTIVATE_FORMINS	1	9	139	0.998284	1	0	TUBB8
REACTOME_TNFR2_NON_CANONICAL_NF_KB_PATHWAY	0	7	100	0.998023	1	0
REACTOME_TNFS_BIND_THEIR_PHYSIOLOGICAL_RECEPTORS	0	2	28	0.82401	1	0
REACTOME_RAF_ACTIVATION	0	2	30	0.844576	1	0
REACTOME_CONSTITUTIVE_SIGNALING_BY_AKT1_E17K_IN_CANCER	0	2	26	0.800726	1	0
REACTOME_DEFECTIVE_CFTR_CAUSES_CYSTIC_FIBROSIS	0	4	61	0.977425	1	0
REACTOME_SURFACTANT_METABOLISM	0	2	30	0.844576	1	0
REACTOME_HDR_THROUGH_SINGLE_STRAND_ANNEALING_SSA	0	3	37	0.899415	1	0
REACTOME_HDR_THROUGH_HOMOLOGOUS_RECOMBINATION_HRR	0	5	67	0.984471	1	0
REACTOME_MAPK6_MAPK4_SIGNALING	2	6	93	0.924124	1	0	PAK3:JUN
REACTOME_DEUBIQUITINATION	2	18	298	0.999998	1	0	NOD2:SMAD1
REACTOME_UCH_PROTEINASES	0	7	102	0.998256	1	0
REACTOME_UB_SPECIFIC_PROCESSING_PROTEASES	1	14	221	0.999985	1	0	SMAD1
REACTOME_METALLOPROTEASE_DUBS	0	3	37	0.899415	1	0
REACTOME_CD22_MEDIATED_BCR_REGULATION	1	4	61	0.888867	1	0	IGLV3-21
REACTOME_DNA_DOUBLE_STRAND_BREAK_REPAIR	2	10	166	0.997817	1	0	EYA2:AC016586.1
REACTOME_RESOLUTION_OF_D_LOOP_STRUCTURES	0	3	34	0.878789	1	0
REACTOME_HOMOLOGY_DIRECTED_REPAIR	1	9	138	0.998184	1	0	AC016586.1
REACTOME_RESOLUTION_OF_D_LOOP_STRUCTURES_THROUGH_SYNTHESIS_DEPENDENT_STRAND_ANNEALING_SDSA	0	2	26	0.800726	1	0
REACTOME_NONHOMOLOGOUS_END_JOINING_NHEJ	0	5	69	0.986292	1	0
REACTOME_HOMOLOGOUS_DNA_PAIRING_AND_STRAND_EXCHANGE	0	3	42	0.9263	1	0
REACTOME_DNA_DOUBLE_STRAND_BREAK_RESPONSE	1	5	77	0.950409	1	0	EYA2
REACTOME_PROCESSING_OF_DNA_DOUBLE_STRAND_BREAK_ENDS	1	6	98	0.98359	1	0	AC016586.1
REACTOME_DNA_DAMAGE_RECOGNITION_IN_GG_NER	0	3	38	0.90548	1	0
REACTOME_GAP_FILLING_DNA_REPAIR_SYNTHESIS_AND_LIGATION_IN_GG_NER	0	2	25	0.787956	1	0
REACTOME_GLOBAL_GENOME_NUCLEOTIDE_EXCISION_REPAIR_GG_NER	0	6	84	0.994626	1	0
REACTOME_DUAL_INCISION_IN_GG_NER	0	3	41	0.921569	1	0
REACTOME_RNA_POLYMERASE_II_PRE_TRANSCRIPTION_EVENTS	0	6	84	0.994626	1	0
REACTOME_FORMATION_OF_TC_NER_PRE_INCISION_COMPLEX	0	4	53	0.962839	1	0
REACTOME_TRANSCRIPTION_COUPLED_NUCLEOTIDE_EXCISION_REPAIR_TC_NER	0	5	78	0.992183	1	0
REACTOME_DUAL_INCISION_IN_TC_NER	0	4	65	0.982408	1	0
REACTOME_TRNA_MODIFICATION_IN_THE_NUCLEUS_AND_CYTOSOL	0	3	43	0.930746	1	0
REACTOME_INTERLEUKIN_6_FAMILY_SIGNALING	0	2	24	0.774368	1	0
REACTOME_TRNA_PROCESSING_IN_THE_NUCLEUS	0	4	59	0.974429	1	0
REACTOME_RRNA_MODIFICATION_IN_THE_NUCLEUS_AND_CYTOSOL	0	4	60	0.975974	1	0
REACTOME_TP53_REGULATES_TRANSCRIPTION_OF_CELL_CYCLE_GENES	0	3	49	0.952328	1	0
REACTOME_TP53_REGULATES_TRANSCRIPTION_OF_DNA_REPAIR_GENES	1	4	65	0.90884	1	0	JUN
REACTOME_COMPLEX_I_BIOGENESIS	0	4	55	0.967191	1	0
REACTOME_REGULATION_OF_TP53_ACTIVITY_THROUGH_PHOSPHORYLATION	3	6	92	0.811342	1	0	PRKAG3:PRKAA2:TP53INP1
REACTOME_REGULATION_OF_TP53_ACTIVITY_THROUGH_ACETYLATION	0	2	30	0.844576	1	0
REACTOME_PTEN_REGULATION	3	9	138	0.969754	1	0	PREX2:PPARG:JUN
REACTOME_RNA_POLYMERASE_II_TRANSCRIBES_SNRNA_GENES	0	5	81	0.993518	1	0
REACTOME_COPI_DEPENDENT_GOLGI_TO_ER_RETROGRADE_TRAFFIC	2	6	99	0.94198	1	0	KIF19:TUBB8
REACTOME_COPI_INDEPENDENT_GOLGI_TO_ER_RETROGRADE_TRAFFIC	1	4	52	0.828311	1	0	TUBB8
REACTOME_INTRA_GOLGI_TRAFFIC	0	3	44	0.934924	1	0
REACTOME_RETROGRADE_TRANSPORT_AT_THE_TRANS_GOLGI_NETWORK	0	3	49	0.952328	1	0
REACTOME_INTRA_GOLGI_AND_RETROGRADE_GOLGI_TO_ER_TRAFFIC	2	13	202	0.999675	1	0	KIF19:TUBB8
REACTOME_MITOTIC_PROPHASE	0	9	141	0.999849	1	0
REACTOME_M_PHASE	1	24	392	1	1	0	TUBB8
REACTOME_DNA_REPLICATION_PRE_INITIATION	0	6	85	0.994951	1	0
REACTOME_SWITCHING_OF_ORIGINS_TO_A_POST_REPLICATIVE_STATE	0	6	90	0.996306	1	0
REACTOME_CYCLIN_A_B1_B2_ASSOCIATED_EVENTS_DURING_G2_M_TRANSITION	0	2	25	0.787956	1	0
REACTOME_STABILIZATION_OF_P53	1	4	57	0.8649	1	0	CDKN2A
REACTOME_G1_S_DNA_DAMAGE_CHECKPOINTS	1	5	68	0.921559	1	0	CDKN2A
REACTOME_MITOTIC_SPINDLE_CHECKPOINT	0	7	110	0.998943	1	0
REACTOME_CYCLIN_A:CDK2_ASSOCIATED_EVENTS_AT_S_PHASE_ENTRY	0	6	85	0.994951	1	0
REACTOME_TRNA_PROCESSING	0	7	111	0.999007	1	0
REACTOME_RRNA_PROCESSING	0	13	205	0.999997	1	0
REACTOME_EUKARYOTIC_TRANSLATION_INITIATION	0	8	120	0.999435	1	0
REACTOME_RNA_POLYMERASE_I_TRANSCRIPTION_INITIATION	0	3	47	0.946007	1	0
REACTOME_RNA_POLYMERASE_I_PROMOTER_ESCAPE	0	6	89	0.996068	1	0
REACTOME_RNA_POLYMERASE_II_TRANSCRIPTION_PRE_INITIATION_AND_PROMOTER_OPENING	0	3	47	0.946007	1	0
REACTOME_RNA_POLYMERASE_II_TRANSCRIPTION_TERMINATION	0	4	66	0.983471	1	0
REACTOME_RNA_POLYMERASE_I_TRANSCRIPTION_TERMINATION	0	2	31	0.853941	1	0
REACTOME_RNA_POLYMERASE_I_TRANSCRIPTION	0	7	109	0.998875	1	0
REACTOME_DNA_DAMAGE_BYPASS	0	3	48	0.949266	1	0
REACTOME_DEPURINATION	0	4	56	0.969173	1	0
REACTOME_BASE_EXCISION_REPAIR_AP_SITE_FORMATION	0	4	63	0.980071	1	0
REACTOME_RESOLUTION_OF_ABASIC_SITES_AP_SITES	0	3	38	0.90548	1	0
REACTOME_RNA_POLYMERASE_III_TRANSCRIPTION	0	3	41	0.921569	1	0
REACTOME_GENE_EXPRESSION_TRANSCRIPTION	60	90	1486	0.9998	1	0	HDAC9:SPI1:TP63:GLI2:NOTCH3:RBFOX1:MEF2C:ZNF416:NLRC4:HNF4A:TJP1:ZNF419:COL1A1:PPARGC1A:PRKAG3:NR5A2:GRIA2:ZNF549:PCK1:LGALS3:ZNF20:PPARG:BTG1:HEY2:SKIL:TFAP2A:SMAD6:EGFR:IGFBP3:CDKN2A:TCF7L2:THRB:ABCA6:TRIM63:AUTS2:ZNF222:TAL1:PRKAA2:TP53INP1:ZNF610:ZNF528:MOBP:SMAD1:NPPA:TGIF1:JUN:ZNF454:MAF:ZNF571:MAML2:ZNF529:ZNF555:ZNF667:ZNF521:RORB:PLXNA4:TWIST2:ZNF550:GRIN2B:PCGF2
REACTOME_RNA_POLYMERASE_II_TRANSCRIPTION_ELONGATION	0	4	61	0.977425	1	0
REACTOME_RNA_POLYMERASE_III_TRANSCRIPTION_INITIATION_FROM_TYPE_1_PROMOTER	0	2	28	0.82401	1	0
REACTOME_RNA_POLYMERASE_III_TRANSCRIPTION_INITIATION_FROM_TYPE_3_PROMOTER	0	2	28	0.82401	1	0
REACTOME_NUCLEOSOME_ASSEMBLY	0	5	73	0.989319	1	0
REACTOME_PROTEIN_UBIQUITINATION	0	5	79	0.992656	1	0
REACTOME_THE_ROLE_OF_GTSE1_IN_G2_M_PROGRESSION_AFTER_G2_CHECKPOINT	1	5	78	0.952903	1	0	TUBB8
REACTOME_FBXL7_DOWN_REGULATES_AURKA_DURING_MITOTIC_ENTRY_AND_IN_EARLY_MITOSIS	0	4	55	0.967191	1	0
REACTOME_TBC_RABGAPS	0	3	44	0.934924	1	0
REACTOME_AURKA_ACTIVATION_BY_TPX2	0	5	72	0.988632	1	0
REACTOME_GOLGI_TO_ER_RETROGRADE_TRANSPORT	2	8	133	0.988407	1	0	KIF19:TUBB8
REACTOME_SYNTHESIS_OF_ACTIVE_UBIQUITIN:_ROLES_OF_E1_AND_E2_ENZYMES	0	2	30	0.844576	1	0
REACTOME_E3_UBIQUITIN_LIGASES_UBIQUITINATE_TARGET_PROTEINS	0	4	59	0.974429	1	0
REACTOME_RRNA_PROCESSING_IN_THE_NUCLEUS_AND_CYTOSOL	0	12	193	0.999994	1	0
REACTOME_RAB_GERANYLGERANYLATION	1	4	65	0.90884	1	0	RAB27B
REACTOME_TRANSCRIPTIONAL_REGULATION_BY_RUNX3	3	6	96	0.836598	1	0	CDKN2A:TCF7L2:MAML2
REACTOME_TRANSCRIPTIONAL_REGULATION_BY_RUNX1	5	15	237	0.996417	1	0	SPI1:TJP1:LGALS3:AUTS2:TAL1
REACTOME_RUNX1_REGULATES_GENES_INVOLVED_IN_MEGAKARYOCYTE_DIFFERENTIATION_AND_PLATELET_FUNCTION	0	6	96	0.997461	1	0
REACTOME_ESR_MEDIATED_SIGNALING	8	14	219	0.916226	1	0	NR5A2:FOXA1:EGF:EGFR:GNG4:JUN:ERBB4:GNAT3
REACTOME_RUNX1_REGULATES_TRANSCRIPTION_OF_GENES_INVOLVED_IN_DIFFERENTIATION_OF_HSCS	2	8	128	0.98519	1	0	SPI1:TAL1
REACTOME_REGULATION_OF_RUNX2_EXPRESSION_AND_ACTIVITY	1	5	73	0.939117	1	0	PPARGC1A
REACTOME_REGULATION_OF_RUNX3_EXPRESSION_AND_ACTIVITY	1	4	55	0.851214	1	0	CDKN2A
REACTOME_REGULATION_OF_PTEN_STABILITY_AND_ACTIVITY	1	5	69	0.925414	1	0	PREX2
REACTOME_CRISTAE_FORMATION	0	2	31	0.853941	1	0
REACTOME_GENE_AND_PROTEIN_EXPRESSION_BY_JAK_STAT_SIGNALING_AFTER_INTERLEUKIN_12_STIMULATION	0	3	38	0.90548	1	0
REACTOME_NEDDYLATION	3	15	234	0.999692	1	0	HIF3A:ASB5:SPSB1
REACTOME_CELLULAR_RESPONSES_TO_EXTERNAL_STIMULI	10	33	535	0.999998	1	0	PRKAG3:HIF3A:EGLN3:HSPA12B:CDKN2A:PRKAA2:CYBB:JUN:NOX5:TUBB8
REACTOME_TRIGLYCERIDE_METABOLISM	0	3	38	0.90548	1	0
REACTOME_SIGNALING_BY_NUCLEAR_RECEPTORS	11	16	262	0.870604	1	0	PDK4:NR5A2:FOXA1:EGF:EGFR:ALDH1A1:CRABP1:GNG4:JUN:ERBB4:GNAT3
REACTOME_REGULATION_OF_EXPRESSION_OF_SLITS_AND_ROBOS	2	11	172	0.998402	1	0	SLIT2:COL4A5
REACTOME_ESTROGEN_DEPENDENT_GENE_EXPRESSION	4	9	148	0.947722	1	0	NR5A2:FOXA1:JUN:ERBB4
REACTOME_INTERLEUKIN_12_SIGNALING	1	3	47	0.783038	1	0	IL12A
REACTOME_INTERLEUKIN_1_SIGNALING	3	7	102	0.869135	1	0	IL1R1:S100A12:NOD2
REACTOME_REGULATION_OF_MECP2_EXPRESSION_AND_ACTIVITY	0	2	32	0.862743	1	0
REACTOME_INTERLEUKIN_RECEPTOR_SHC_SIGNALING	0	2	27	0.812729	1	0
REACTOME_NONSENSE_MEDIATED_DECAY_NMD	0	7	116	0.999274	1	0
REACTOME_NEGATIVE_REGULATORS_OF_DDX58_IFIH1_SIGNALING	0	3	34	0.878789	1	0
REACTOME_NEGATIVE_REGULATION_OF_NOTCH4_SIGNALING	0	4	54	0.965083	1	0
REACTOME_PROTEIN_LOCALIZATION	2	10	164	0.997579	1	0	DAO:AGXT
REACTOME_AUTOPHAGY	3	7	109	0.899909	1	0	PRKAG3:PRKAA2:HBB
REACTOME_TRANSCRIPTIONAL_REGULATION_OF_GRANULOPOIESIS	3	6	88	0.782986	1	0	SPI1:CSF3R:TAL1
REACTOME_NONSENSE_MEDIATED_DECAY_NMD_INDEPENDENT_OF_THE_EXON_JUNCTION_COMPLEX_EJC	0	6	96	0.997461	1	0
REACTOME_ANTIGEN_PROCESSING:_UBIQUITINATION_PROTEASOME_DEGRADATION	3	19	308	0.999994	1	0	TRIM63:ASB5:SPSB1
REACTOME_ANTIGEN_PRESENTATION:_FOLDING_ASSEMBLY_AND_PEPTIDE_LOADING_OF_CLASS_I_MHC	0	2	25	0.787956	1	0
REACTOME_ANTIGEN_ACTIVATES_B_CELL_RECEPTOR_BCR_LEADING_TO_GENERATION_OF_SECOND_MESSENGERS	1	6	86	0.968959	1	0	IGLV3-21

## Sheet: Cluster 3
Pathway	observed	expected	pathway_size	p.val	p.adjust	Score	genes
REACTOME_METABOLISM_OF_RNA	352	107	672	7.16304e-117	1.07374e-113	112.969	UPF1:ELAC2:TSR3:PSMB1:PTBP1:PSMC4:MNAT1:AQR:NUP160:RPL26L1:EDC4:PSMA4:POLR2B:NDC1:CCAR1:SNRNP40:EIF4B:U2AF2:WDR18:YBX1:ELAVL1:FTSJ1:NUP133:CPSF1:HSD17B10:CLNS1A:XAB2:SNRPA:EXOSC5:DDX1:GEMIN5:XPO1:TNPO1:DIS3:RPS5:WBP11:SEH1L:CHERP:RBM22:SRRT:PSMC5:NOP14:SF3B2:CNOT3:KHSRP:RPLP0:PAPOLA:PSME1:OSGEP:HNRNPC:NUP50:PSMD5:NUP188:CDC5L:PSMD8:HNRNPM:POLR2E:SF3A1:SNRPD3:PES1:POLR2F:RTCB:POLDIP3:THOC5:PHF5A:P…
REACTOME_PROCESSING_OF_CAPPED_INTRON_CONTAINING_PRE_MRNA	149	39	242	4.97048e-61	3.72538e-58	57.4288	PTBP1:AQR:NUP160:POLR2B:NDC1:CCAR1:SNRNP40:U2AF2:YBX1:ELAVL1:NUP133:CPSF1:XAB2:SNRPA:WBP11:SEH1L:CHERP:RBM22:SRRT:SF3B2:PAPOLA:HNRNPC:NUP50:NUP188:CDC5L:HNRNPM:POLR2E:SF3A1:SNRPD3:POLR2F:POLDIP3:THOC5:PHF5A:SNW1:PABPN1:CSTF1:RAE1:CSTF2:PQBP1:NUP93:POLR2C:HNRNPL:SF3A2:POLR2I:PRPF31:BUD31:LSM5:CASC3:NUP88:EFTUD2:DHX15:HSPA8:PRPF19:NUP98:MAGOHB:NUP107:SRSF9:SRSF3:NUP155:SRSF4:BCAS2:SMNDC1:WBP4:HNRNP…
REACTOME_TRANSLATION	162	47	295	2.38587e-56	1.19214e-53	52.9237	LARS2:RPL26L1:MRPS10:SEC61A1:MRPS35:EIF4B:KARS:EIF2B3:MRPS34:MRPL22:RPS5:EIF3I:MRPL28:RPLP0:AARS:MRPS18A:EIF3D:SRP54:MRPS31:EARS2:EIF3E:SARS2:MRPL4:RPS19:EIF3B:AIMP2:EIF4H:MRPL27:RPS13:EIF2B1:MRPL51:MRPL18:MRPL2:MRPS30:MRPS27:RARS:RPL24:MRPL3:SSR3:EIF4G1:SPCS1:EEF1B2:RPS15:MRPL19:DARS:FARSB:MRPL37:WARS2:MRPS15:RPN2:EIF2B2:MRPS2:RPL5:TSFM:AARS2:SSR1:EEF1E1:MRPS7:RPL23:MRPS26:EIF2S2:MRPS12:SPCS3:RP…
REACTOME_MRNA_SPLICING	121	30	188	7.18225e-53	2.69155e-50	49.57	PTBP1:AQR:POLR2B:CCAR1:SNRNP40:U2AF2:YBX1:ELAVL1:CPSF1:XAB2:SNRPA:WBP11:CHERP:RBM22:SRRT:SF3B2:PAPOLA:HNRNPC:CDC5L:HNRNPM:POLR2E:SF3A1:SNRPD3:POLR2F:PHF5A:SNW1:PABPN1:CSTF1:CSTF2:PQBP1:POLR2C:HNRNPL:SF3A2:POLR2I:PRPF31:BUD31:LSM5:CASC3:EFTUD2:DHX15:HSPA8:PRPF19:MAGOHB:SRSF9:SRSF3:SRSF4:BCAS2:SMNDC1:WBP4:HNRNPA2B1:SNRNP27:SNRPC:UPF3B:GTF2F1:SNRPD2:SYMPK:SNRPB:SNRPB2:HNRNPR:DNAJC8:LSM4:CTNNBL1:SRRM…
REACTOME_INFECTIOUS_DISEASE	178	61	382	4.98164e-48	1.4935e-45	44.8258	SLC25A5:PSMB1:VTA1:PSMC4:MNAT1:NUP160:RPL26L1:PSMA4:POLR2B:NDC1:TAF2:TAF11:IPO5:NUP133:XRCC5:HSP90AA1:XPO1:RPS5:CHMP2B:SEH1L:PSMC5:RPLP0:CCNK:PSME1:SUPT16H:NUP50:PSMD5:NUP188:HSP90AB1:PSMD8:POLR2E:RANBP1:POLR2F:AP1B1:RBX1:RANGAP1:PSMC6:PSMA3:PSMB5:PABPN1:PSME2:RAE1:NELFCD:PSMA7:CHMP4B:KPNA3:NUP93:POLR2C:PSMD7:POLR2I:TGFB1:RPS19:PSMD3:KPNB1:NUP88:PSMD11:RPS13:NUP98:GTF2H1:GTF2H3:NUP107:RNGTT:TBP:H…
REACTOME_HIV_INFECTION	127	38	234	1.33579e-43	3.33726e-41	40.4766	SLC25A5:PSMB1:VTA1:PSMC4:MNAT1:NUP160:PSMA4:POLR2B:NDC1:TAF2:TAF11:NUP133:XRCC5:XPO1:CHMP2B:SEH1L:PSMC5:CCNK:PSME1:SUPT16H:NUP50:PSMD5:NUP188:PSMD8:POLR2E:RANBP1:POLR2F:AP1B1:RBX1:RANGAP1:PSMC6:PSMA3:PSMB5:PSME2:RAE1:NELFCD:PSMA7:CHMP4B:NUP93:POLR2C:PSMD7:POLR2I:PSMD3:KPNB1:NUP88:PSMD11:NUP98:GTF2H1:GTF2H3:NUP107:RNGTT:TBP:NUP155:PSMD14:NUP153:NUP85:GTF2F1:PSMF1:PSMB2:NUP214:PSMA1:CHMP2A:PSME3:RA…
REACTOME_MITOCHONDRIAL_TRANSLATION	69	16	96	8.42323e-36	1.80377e-33	32.7438	MRPS10:MRPS35:MRPS34:MRPL22:MRPL28:MRPS18A:MRPS31:MRPL4:MRPL27:MRPL51:MRPL18:MRPL2:MRPS30:MRPS27:MRPL3:MRPL19:MRPL37:MRPS15:MRPS2:TSFM:MRPS7:MRPS26:MRPS12:MRPL35:ERAL1:DAP3:MRPS36:MRPL44:MRPS9:MRPL47:MRPL50:MRPL15:MRPL24:MRPL9:MRPS5:MRPS28:MRRF:MRPL49:MRPL39:MRPL17:MRPS18C:GFM2:GFM1:MRPL1:MRPL36:MRPL13:CHCHD1:MRPL52:MRPL11:MRPS22:MRPL48:AURKAIP1:TUFM:GADD45GIP1:MRPL14:MRPS23:MRPS11:MRPS16:MRPL54:…
REACTOME_HOST_INTERACTIONS_OF_HIV_FACTORS	78	21	131	3.13741e-31	5.87872e-29	28.2307	SLC25A5:PSMB1:PSMC4:NUP160:PSMA4:NDC1:NUP133:XPO1:SEH1L:PSMC5:PSME1:NUP50:PSMD5:NUP188:PSMD8:RANBP1:AP1B1:RBX1:RANGAP1:PSMC6:PSMA3:PSMB5:PSME2:RAE1:PSMA7:NUP93:PSMD7:PSMD3:KPNB1:NUP88:PSMD11:NUP98:NUP107:NUP155:PSMD14:NUP153:NUP85:PSMF1:PSMB2:NUP214:PSMA1:PSME3:RAN:NUPL2:CDK9:PSMB7:HMGA1:NUP54:PSMB6:PSMA5:ARF1:AP1S3:NUP205:ELMO1:SEC13:PSMD4:PSMB4:PSMC2:NUP35:PSMD6:PSMC3:AP1G1:UBB:PSMD1:PSMD2:BANF…
REACTOME_HIV_LIFE_CYCLE	83	25	152	2.58446e-29	4.30455e-27	26.3661	VTA1:MNAT1:NUP160:POLR2B:NDC1:TAF2:TAF11:NUP133:XRCC5:XPO1:CHMP2B:SEH1L:CCNK:SUPT16H:NUP50:NUP188:POLR2E:RANBP1:POLR2F:RANGAP1:RAE1:NELFCD:CHMP4B:NUP93:POLR2C:POLR2I:NUP88:NUP98:GTF2H1:GTF2H3:NUP107:RNGTT:TBP:NUP155:NUP153:NUP85:GTF2F1:NUP214:CHMP2A:RAN:VPS4A:CDK7:NUPL2:NMT1:CDK9:NCBP1:HMGA1:GTF2B:NUP54:GTF2A2:POLR2D:GTF2H2:POLR2K:TAF5:SSRP1:GTF2E1:NUP205:SEC13:NUP35:ERCC3:POLR2H:UBAP1:TAF10:UBB:…
REACTOME_INFLUENZA_INFECTION	84	25	156	4.71895e-29	7.07371e-27	26.1504	NUP160:RPL26L1:POLR2B:NDC1:IPO5:NUP133:HSP90AA1:XPO1:RPS5:SEH1L:RPLP0:NUP50:NUP188:POLR2E:POLR2F:PABPN1:RAE1:KPNA3:NUP93:POLR2C:POLR2I:TGFB1:RPS19:KPNB1:NUP88:RPS13:NUP98:NUP107:NUP155:RPL24:RPS15:RPL5:CLTA:NUP153:NUP85:GTF2F1:RPL23:NUP214:CANX:RPL36:RPL27:RAN:GRSF1:NUPL2:RPL35:RPLP1:RPS24:NUP54:CLTC:RPS8:POLR2D:POLR2K:RPL7A:FAU:NUP205:SEC13:CPSF4:RPL8:RPL29:NUP35:RPL22L1:POLR2H:RPL27A:RPSA:RPS9:…
REACTOME_REGULATION_OF_MRNA_STABILITY_BY_PROTEINS_THAT_BIND_AU_RICH_ELEMENTS	59	14	87	1.11408e-28	1.51819e-26	25.8187	PSMB1:PSMC4:PSMA4:ELAVL1:EXOSC5:XPO1:TNPO1:DIS3:PSMC5:KHSRP:PSME1:PSMD5:PSMD8:PSMC6:PSMA3:PSMB5:PSME2:PSMA7:PSMD7:EXOSC3:PSMD3:PSMD11:HSPA8:EIF4G1:PSMD14:SET:EXOSC8:EXOSC9:PSMF1:PSMB2:NUP214:PSMA1:EXOSC2:PSME3:PSMB7:HNRNPD:ANP32A:PSMB6:PSMA5:PSMD4:PSMB4:PSMC2:MAPKAPK2:PSMD6:YWHAZ:PSMC3:YWHAB:UBB:EXOSC1:PSMD1:PSMD2:EXOSC4:PSMD13:PSMD12:HSPA1A:PSMB10:UBA52:PSMB9:PSMB3
REACTOME_RRNA_PROCESSING_IN_THE_NUCLEUS_AND_CYTOSOL	88	31	193	1.5037e-23	1.87838e-21	20.7262	TSR3:RPL26L1:WDR18:EXOSC5:DIS3:RPS5:NOP14:RPLP0:PES1:NOP56:ERI1:FBL:RPS19:DDX49:EXOSC3:FTSJ3:GAR1:RPS13:NOP2:BYSL:RPL24:NCL:RPS15:WDR75:EBNA1BP2:FCF1:EXOSC8:RPL5:EXOSC9:RRP36:RPL23:EMG1:RPL36:EXOSC2:DKC1:NOL11:RPL27:NAT10:MPHOSPH6:IMP4:RPL35:RPLP1:RPS24:NOB1:RPS8:ISG20L2:NHP2:RPL7A:RPP30:PDCD11:FAU:DHX37:UTP14A:RPL8:SENP3:RPL29:RPL22L1:GNL3:DCAF13:NOL6:BMS1:RPL27A:RPSA:RPS9:EXOSC1:EXOSC10:RPS21:R…
REACTOME_AUF1_HNRNP_D0_BINDS_AND_DESTABILIZES_MRNA	41	9	55	2.75237e-23	3.17369e-21	20.4984	PSMB1:PSMC4:PSMA4:PSMC5:PSME1:PSMD5:PSMD8:PSMC6:PSMA3:PSMB5:PSME2:PSMA7:PSMD7:PSMD3:PSMD11:HSPA8:EIF4G1:PSMD14:PSMF1:PSMB2:PSMA1:PSME3:PSMB7:HNRNPD:PSMB6:PSMA5:PSMD4:PSMB4:PSMC2:PSMD6:PSMC3:UBB:PSMD1:PSMD2:PSMD13:PSMD12:HSPA1A:PSMB10:UBA52:PSMB9:PSMB3
REACTOME_RRNA_PROCESSING	91	33	205	2.97411e-23	3.18443e-21	20.497	ELAC2:TSR3:RPL26L1:WDR18:HSD17B10:EXOSC5:DIS3:RPS5:NOP14:RPLP0:PES1:NOP56:ERI1:FBL:RPS19:DDX49:EXOSC3:FTSJ3:GAR1:RPS13:NOP2:BYSL:RPL24:NCL:RPS15:WDR75:EBNA1BP2:FCF1:EXOSC8:RPL5:EXOSC9:RRP36:RPL23:EMG1:RPL36:EXOSC2:DKC1:NOL11:RPL27:NAT10:MPHOSPH6:IMP4:RPL35:RPLP1:RPS24:NOB1:RPS8:ISG20L2:NHP2:RPL7A:RPP30:PDCD11:FAU:DHX37:UTP14A:RPL8:SENP3:RPL29:RPL22L1:GNL3:DCAF13:NOL6:BMS1:RPL27A:RPSA:RPS9:EXOSC1:…
REACTOME_REGULATION_OF_EXPRESSION_OF_SLITS_AND_ROBOS	81	28	172	5.76501e-23	5.76116e-21	20.2395	PSMB1:PSMC4:RPL26L1:PSMA4:RPS5:PSMC5:RPLP0:PSME1:PSMD5:PSMD8:RBX1:PSMC6:PSMA3:PSMB5:PSME2:PSMA7:PSMD7:RPS19:CUL2:PSMD3:CASC3:PSMD11:RPS13:MAGOHB:RPL24:EIF4G1:PSMD14:RPS15:RPL5:UPF3B:RPL23:PSMF1:PSMB2:PSMA1:RPL36:PSME3:RPL27:PSMB7:NCBP1:RPL35:RPLP1:RPS24:EIF4A3:PSMB6:RPS8:PSMA5:RPL7A:FAU:UPF2:PSMD4:PSMB4:RPL8:PSMC2:RPL29:MAGOH:RPL22L1:PSMD6:PSMC3:RPL27A:RPSA:UBB:RPS9:RPS21:RPS7:PSMD1:RPL4:RPL15:PS…
REACTOME_ACTIVATION_OF_APC_C_AND_APC_C:CDC20_MEDIATED_DEGRADATION_OF_MITOTIC_PROTEINS	49	13	76	1.13855e-22	1.06668e-20	19.972	PSMB1:PSMC4:PSMA4:PSMC5:ANAPC5:PSME1:CDC23:PSMD5:PSMD8:PSMC6:PSMA3:PSMB5:PSME2:PSMA7:PSMD7:PSMD3:PSMD11:PSMD14:PSMF1:PSMB2:PSMA1:CDC16:PSME3:CCNB1:PSMB7:ANAPC11:PSMB6:PSMA5:ANAPC1:BUB3:PSMD4:PSMB4:PSMC2:PSMD6:ANAPC10:PTTG1:PSMC3:UBE2E1:UBB:PSMD1:PSMD2:CDC26:PSMD13:ANAPC7:PSMD12:PSMB10:UBA52:PSMB9:PSMB3
REACTOME_NEGATIVE_REGULATION_OF_NOTCH4_SIGNALING	40	9	54	1.35459e-22	1.19443e-20	19.9228	PSMB1:PSMC4:PSMA4:CUL1:PSMC5:PSME1:PSMD5:PSMD8:RBX1:PSMC6:PSMA3:PSMB5:PSME2:PSMA7:PSMD7:PSMD3:PSMD11:PSMD14:PSMF1:PSMB2:PSMA1:PSME3:PSMB7:PSMB6:PSMA5:PSMD4:PSMB4:PSMC2:PSMD6:YWHAZ:PSMC3:UBB:PSMD1:PSMD2:PSMD13:PSMD12:PSMB10:UBA52:PSMB9:PSMB3
REACTOME_TRNA_PROCESSING	61	18	111	2.82339e-22	2.35125e-20	19.6287	ELAC2:NUP160:NDC1:FTSJ1:NUP133:CPSF1:HSD17B10:DDX1:SEH1L:OSGEP:NUP50:NUP188:RTCB:RAE1:CSTF2:NUP93:POP1:POP4:NUP88:PUS3:NUP98:NUP107:THG1L:NUP155:THADA:NUP153:NUP85:TRMT5:NUP214:GTPBP3:RAN:NUPL2:EPRS:NUP54:CTU1:TPRKB:RPP30:NUP205:SEC13:WDR4:CPSF4:TYW3:NUP35:URM1:DUS2:LCMT2:TRMT61B:FAM98B:POP7:CLP1:TRMT112:CTU2:PUS1:RPP25:TSEN54:POM121:TSEN15:NUP62:QTRT1:ADAT3:POM121C
REACTOME_APC_C:CDH1_MEDIATED_DEGRADATION_OF_CDC20_AND_OTHER_APC_C:CDH1_TARGETED_PROTEINS_IN_LATE_MITOSIS_EARLY_G1	47	12	72	3.42012e-22	2.6983e-20	19.5689	PSMB1:PSMC4:PSMA4:PSMC5:ANAPC5:PSME1:CDC23:PSMD5:PSMD8:PSMC6:PSMA3:PSMB5:PSME2:PSMA7:PSMD7:PSMD3:PSMD11:PSMD14:PSMF1:PSMB2:PSMA1:CDC16:PSME3:PSMB7:ANAPC11:PSMB6:PSMA5:ANAPC1:PSMD4:PSMB4:PSMC2:PSMD6:ANAPC10:PTTG1:PSMC3:UBE2E1:UBB:PSMD1:PSMD2:CDC26:PSMD13:ANAPC7:PSMD12:PSMB10:UBA52:PSMB9:PSMB3
REACTOME_REGULATION_OF_RUNX3_EXPRESSION_AND_ACTIVITY	40	9	55	4.51554e-22	3.3844e-20	19.4705	PSMB1:PSMC4:RUNX3:PSMA4:CBFB:PSMC5:PSME1:PSMD5:PSMD8:PSMC6:PSMA3:PSMB5:PSME2:PSMA7:PSMD7:TGFB1:PSMD3:PSMD11:PSMD14:PSMF1:PSMB2:PSMA1:PSME3:PSMB7:PSMB6:PSMA5:PSMD4:PSMB4:PSMC2:PSMD6:PSMC3:UBB:PSMD1:PSMD2:PSMD13:PSMD12:PSMB10:UBA52:PSMB9:PSMB3
REACTOME_VIRAL_MESSENGER_RNA_SYNTHESIS	35	7	44	5.43594e-22	3.88023e-20	19.4111	NUP160:POLR2B:NDC1:NUP133:SEH1L:NUP50:NUP188:POLR2E:POLR2F:RAE1:NUP93:POLR2C:POLR2I:NUP88:NUP98:NUP107:NUP155:NUP153:NUP85:GTF2F1:NUP214:NUPL2:NUP54:POLR2D:POLR2K:NUP205:SEC13:NUP35:POLR2H:POLR2L:POLR2A:GTF2F2:POM121:NUP62:POM121C
REACTOME_DOWNSTREAM_SIGNALING_EVENTS_OF_B_CELL_RECEPTOR_BCR	50	13	81	8.35931e-22	5.69573e-20	19.2445	PSMB1:PSMC4:PSMA4:CUL1:FBXW11:PSMC5:FKBP1A:PSME1:PSMD5:PSMD8:PSMC6:PSMA3:PSMB5:PSME2:PSMA7:PSMD7:NFKBIB:PPP3CB:PSMD3:PSMD11:PSMD14:PSMF1:PSMB2:PSMA1:NFATC1:PSME3:PSMB7:PSMB6:PSMA5:NFKBIE:PSMD4:PSMB4:PSMC2:PSMD6:PSMC3:UBB:PSMD1:HRAS:PSMD2:PSMD13:PPIA:PSMD12:PSMB10:NRAS:CHUK:PPP3R1:UBA52:PSMB9:IKBKG:PSMB3
REACTOME_METABOLISM_OF_POLYAMINES	41	10	59	2.72837e-21	1.77819e-19	18.75	PSMB1:PSMC4:PSMA4:PSMC5:PSME1:PSMD5:PSMD8:PSMC6:PSMA3:PSMB5:PSME2:PSMA7:SMS:PSMD7:OAZ1:PSMD3:PSMD11:PSMD14:ODC1:SRM:AGMAT:PSMF1:PSMB2:PSMA1:PSME3:PSMB7:PSMB6:PSMA5:AZIN1:PSMD4:PSMB4:PSMC2:PSMD6:PSMC3:PSMD1:PSMD2:PSMD13:PSMD12:PSMB10:PSMB9:PSMB3
REACTOME_CDK_MEDIATED_PHOSPHORYLATION_AND_REMOVAL_OF_CDC6	46	12	72	3.60057e-21	2.24886e-19	18.648	PSMB1:PSMC4:PSMA4:PSMC5:ANAPC5:PSME1:CDC23:PSMD5:PSMD8:PSMC6:PSMA3:PSMB5:PSME2:PSMA7:PSMD7:PSMD3:PSMD11:PSMD14:PSMF1:PSMB2:PSMA1:CDC16:PSME3:PSMB7:ANAPC11:PSMB6:PSMA5:ANAPC1:PSMD4:PSMB4:PSMC2:PSMD6:ANAPC10:PSMC3:UBE2E1:UBB:PSMD1:PSMD2:CDC26:PSMD13:ANAPC7:PSMD12:PSMB10:UBA52:PSMB9:PSMB3
REACTOME_REGULATION_OF_MITOTIC_CELL_CYCLE	51	14	86	4.83313e-21	2.78649e-19	18.5549	PSMB1:PSMC4:PSMA4:CUL1:PSMC5:ANAPC5:PSME1:CDC23:PSMD5:PSMD8:PSMC6:PSMA3:PSMB5:PSME2:PSMA7:PSMD7:PSMD3:PSMD11:FBXO5:PSMD14:PSMF1:PSMB2:PSMA1:CDC16:PSME3:CCNB1:PSMB7:ANAPC11:PSMB6:PSMA5:ANAPC1:BUB3:PSMD4:PSMB4:PSMC2:PSMD6:ANAPC10:PTTG1:PSMC3:UBE2E1:UBB:PSMD1:PSMD2:CDC26:PSMD13:ANAPC7:PSMD12:PSMB10:UBA52:PSMB9:PSMB3
REACTOME_DECTIN_1_MEDIATED_NONCANONICAL_NF_KB_SIGNALING	42	10	62	4.70063e-21	2.78649e-19	18.5549	MAP3K14:PSMB1:PSMC4:PSMA4:CUL1:FBXW11:NFKB2:PSMC5:PSME1:PSMD5:PSMD8:PSMC6:PSMA3:PSMB5:PSME2:PSMA7:PSMD7:PSMD3:PSMD11:PSMD14:PSMF1:PSMB2:PSMA1:PSME3:PSMB7:PSMB6:PSMA5:PSMD4:PSMB4:PSMC2:PSMD6:PSMC3:UBB:PSMD1:PSMD2:PSMD13:PSMD12:PSMB10:CHUK:UBA52:PSMB9:PSMB3
REACTOME_FBXL7_DOWN_REGULATES_AURKA_DURING_MITOTIC_ENTRY_AND_IN_EARLY_MITOSIS	39	9	55	6.74715e-21	3.74592e-19	18.4264	PSMB1:PSMC4:PSMA4:CUL1:PSMC5:PSME1:PSMD5:PSMD8:RBX1:PSMC6:PSMA3:PSMB5:PSME2:PSMA7:PSMD7:PSMD3:PSMD11:PSMD14:PSMF1:PSMB2:PSMA1:PSME3:PSMB7:PSMB6:PSMA5:PSMD4:PSMB4:PSMC2:PSMD6:PSMC3:UBB:PSMD1:PSMD2:PSMD13:PSMD12:PSMB10:UBA52:PSMB9:PSMB3
REACTOME_TRANSPORT_OF_MATURE_TRANSCRIPT_TO_CYTOPLASM	50	14	84	8.91753e-21	4.77406e-19	18.3211	NUP160:NDC1:U2AF2:NUP133:CPSF1:SEH1L:NUP50:NUP188:POLDIP3:THOC5:RAE1:NUP93:CASC3:NUP88:NUP98:MAGOHB:NUP107:SRSF9:SRSF3:NUP155:SRSF4:DDX39A:NUP153:UPF3B:NUP85:SYMPK:NUP214:THOC6:SRRM1:NUPL2:SRSF1:NCBP1:NUP54:DHX38:EIF4A3:FIP1L1:NUP205:SEC13:U2AF1:CPSF4:SRSF2:MAGOH:NUP35:THOC7:CPSF2:ALYREF:POM121:RNPS1:NUP62:POM121C
REACTOME_REGULATION_OF_APOPTOSIS	38	9	53	1.03439e-20	5.34671e-19	18.2719	PSMB1:PSMC4:PSMA4:PSMC5:PSME1:PSMD5:PSMD8:PSMC6:PSMA3:PSMB5:PSME2:PSMA7:PSMD7:PSMD3:PSMD11:PSMD14:PSMF1:PSMB2:PSMA1:PSME3:PSMB7:PSMB6:PSMA5:PSMD4:PSMB4:PSMC2:PSMD6:PSMC3:UBB:PSMD1:PSMD2:PSMD13:PSMD12:OPA1:PSMB10:UBA52:PSMB9:PSMB3
REACTOME_DEFECTIVE_CFTR_CAUSES_CYSTIC_FIBROSIS	41	10	61	2.10227e-20	1.05044e-18	17.9786	PSMB1:PSMC4:PSMA4:PSMC5:PSME1:PSMD5:PSMD8:PSMC6:PSMA3:PSMB5:PSME2:PSMA7:PSMD7:ERLIN1:PSMD3:PSMD11:PSMD14:PSMF1:PSMB2:PSMA1:PSME3:PSMB7:DERL1:RNF185:PSMB6:PSMA5:PSMD4:PSMB4:PSMC2:PSMD6:VCP:PSMC3:UBB:PSMD1:PSMD2:PSMD13:PSMD12:PSMB10:UBA52:PSMB9:PSMB3
REACTOME_CELLULAR_RESPONSES_TO_STRESS	145	70	440	2.88325e-20	1.39419e-18	17.8557	FKBP4:PSMB1:SCMH1:PSMC4:NUP160:PSMA4:NDC1:NUP133:DNAJA2:HSP90AA1:SEH1L:DNAJA1:PSMC5:ANAPC5:PSME1:NUP50:CDC23:PSMD5:NUP188:HSP90AB1:PSMD8:MAPK1:HIRA:ST13:RBX1:PSMC6:PSMA3:PSMB5:PSME2:RAE1:PSMA7:RBBP7:NUP93:PSMD7:NBN:DCTN6:GSR:ERF:EZH2:CUL2:PSMD3:NUP88:PSMD11:YWHAE:HSPA8:NUP98:PTGES3:NUP107:MRPL18:HSPA9:NUP155:MAPKAPK3:IL1A:PSMD14:CAPZA1:PRDX1:UBN1:HSPH1:RNF2:NUP153:NUP85:PSMF1:PSMB2:NUP214:PSMA1:C…
REACTOME_VIF_MEDIATED_DEGRADATION_OF_APOBEC3G	38	9	54	3.15997e-20	1.48025e-18	17.8297	PSMB1:PSMC4:PSMA4:PSMC5:PSME1:PSMD5:PSMD8:RBX1:PSMC6:PSMA3:PSMB5:PSME2:PSMA7:PSMD7:PSMD3:PSMD11:PSMD14:PSMF1:PSMB2:PSMA1:PSME3:PSMB7:PSMB6:PSMA5:PSMD4:PSMB4:PSMC2:PSMD6:PSMC3:UBB:PSMD1:PSMD2:PSMD13:PSMD12:PSMB10:UBA52:PSMB9:PSMB3
REACTOME_ACTIVATION_OF_NF_KAPPAB_IN_B_CELLS	43	11	67	4.68088e-20	2.12626e-18	17.6724	PSMB1:PSMC4:PSMA4:CUL1:FBXW11:PSMC5:PSME1:PSMD5:PSMD8:PSMC6:PSMA3:PSMB5:PSME2:PSMA7:PSMD7:NFKBIB:PSMD3:PSMD11:PSMD14:PSMF1:PSMB2:PSMA1:PSME3:PSMB7:PSMB6:PSMA5:NFKBIE:PSMD4:PSMB4:PSMC2:PSMD6:PSMC3:UBB:PSMD1:PSMD2:PSMD13:PSMD12:PSMB10:CHUK:UBA52:PSMB9:IKBKG:PSMB3
REACTOME_DEGRADATION_OF_DVL	39	10	57	5.70147e-20	2.44186e-18	17.6123	DVL2:PSMB1:PSMC4:PSMA4:PSMC5:PSME1:PSMD5:PSMD8:RBX1:PSMC6:PSMA3:PSMB5:PSME2:PSMA7:PSMD7:PSMD3:PSMD11:PSMD14:PSMF1:PSMB2:PSMA1:PSME3:PSMB7:PSMB6:PSMA5:PSMD4:PSMB4:PSMC2:PSMD6:PSMC3:UBB:PSMD1:PSMD2:PSMD13:PSMD12:PSMB10:UBA52:PSMB9:PSMB3
REACTOME_CELLULAR_RESPONSES_TO_EXTERNAL_STIMULI	166	85	535	5.66932e-20	2.44186e-18	17.6123	FKBP4:PSMB1:SCMH1:PSMC4:RRAGD:NUP160:PSMA4:NDC1:NUP133:DNAJA2:CSNK2A2:HSP90AA1:CHMP2B:SEH1L:DNAJA1:PSMC5:ANAPC5:PSME1:NUP50:CDC23:PSMD5:NUP188:HSP90AB1:PSMD8:MAPK1:HIRA:TOMM22:ST13:RBX1:PSMC6:PSMA3:PSMB5:PSME2:RAE1:PSMA7:CSNK2A1:CHMP4B:RBBP7:NUP93:PSMD7:NBN:DCTN6:GSR:ERF:EZH2:CUL2:PSMD3:NUP88:PSMD11:YWHAE:HSPA8:NUP98:PTGES3:NUP107:MRPL18:HSPA9:NUP155:MAPKAPK3:IL1A:PSMD14:CAPZA1:MFN2:PRDX1:UBN1:HS…
REACTOME_INTERACTIONS_OF_REV_WITH_HOST_CELLULAR_PROTEINS	30	6	37	1.0798e-19	4.49617e-18	17.3472	NUP160:NDC1:NUP133:XPO1:SEH1L:NUP50:NUP188:RANBP1:RANGAP1:RAE1:NUP93:KPNB1:NUP88:NUP98:NUP107:NUP155:NUP153:NUP85:NUP214:RAN:NUPL2:NUP54:NUP205:SEC13:NUP35:RCC1:NPM1:POM121:NUP62:POM121C
REACTOME_ASYMMETRIC_LOCALIZATION_OF_PCP_PROTEINS	41	11	64	3.47486e-19	1.40779e-17	16.8515	DVL2:PSMB1:PSMC4:PSMA4:PSMC5:PSME1:PSMD5:PSMD8:PSMC6:PSMA3:PSMB5:PSME2:PSMA7:PSMD7:FZD3:PSMD3:PSMD11:PSMD14:PSMF1:PSMB2:PSMA1:PSME3:PSMB7:PSMB6:PSMA5:PSMD4:PSMB4:PSMC2:FZD5:PSMD6:PSMC3:UBB:PSMD1:PSMD2:SCRIB:PSMD13:PSMD12:PSMB10:UBA52:PSMB9:PSMB3
REACTOME_METABOLISM_OF_NON_CODING_RNA	37	9	54	4.2076e-19	1.61723e-17	16.7912	NUP160:NDC1:NUP133:CLNS1A:GEMIN5:SEH1L:NUP50:NUP188:SNRPD3:PRMT5:RAE1:NUP93:NUP88:NUP98:NUP107:NUP155:WDR77:NUP153:NUP85:SNRPD2:SNRPB:NUP214:NUPL2:NCBP1:NUP54:SNRPF:GEMIN7:SNRPG:NUP205:SEC13:NUP35:SNRPD1:GEMIN4:SNRPE:POM121:NUP62:POM121C
REACTOME_TRNA_PROCESSING_IN_THE_NUCLEUS	39	10	59	4.10792e-19	1.61723e-17	16.7912	ELAC2:NUP160:NDC1:NUP133:CPSF1:DDX1:SEH1L:NUP50:NUP188:RTCB:RAE1:CSTF2:NUP93:POP1:POP4:NUP88:NUP98:NUP107:NUP155:NUP153:NUP85:NUP214:RAN:NUPL2:NUP54:RPP30:NUP205:SEC13:CPSF4:NUP35:FAM98B:POP7:CLP1:RPP25:TSEN54:POM121:TSEN15:NUP62:POM121C
REACTOME_INTERLEUKIN_1_SIGNALING	54	17	102	6.04588e-19	2.26569e-17	16.6448	PSMB1:PSMC4:PSMA4:CUL1:FBXW11:NFKB2:PSMC5:PSME1:PSMD5:PSMD8:RBX1:PSMC6:PSMA3:PSMB5:PSME2:PSMA7:PSMD7:RIPK2:NFKBIB:PSMD3:PSMD11:IL1A:PSMD14:IL1B:PSMF1:PSMB2:PSMA1:PSME3:PSMB7:PSMB6:PSMA5:TAB3:PSMD4:PSMB4:SQSTM1:PSMC2:PSMD6:PSMC3:NKIRAS2:TNIP2:UBB:MYD88:PSMD1:PSMD2:UBE2N:IRAK1:PSMD13:PSMD12:PSMB10:CHUK:UBA52:PSMB9:IKBKG:PSMB3
REACTOME_STABILIZATION_OF_P53	38	10	57	6.92434e-19	2.53161e-17	16.5966	PSMB1:PSMC4:PSMA4:PSMC5:PSME1:PSMD5:PSMD8:PSMC6:PSMA3:PSMB5:PSME2:PSMA7:PSMD7:PSMD3:PSMD11:PSMD14:PSMF1:PSMB2:PSMA1:PSME3:PSMB7:TP53:PSMB6:PSMA5:PSMD4:PSMB4:PSMC2:PSMD6:PSMC3:UBB:PSMD1:PSMD2:PSMD13:PSMD12:PSMB10:UBA52:PSMB9:PSMB3
REACTOME_SCF_SKP2_MEDIATED_DEGRADATION_OF_P27_P21	39	10	60	1.04577e-18	3.64562e-17	16.4382	PSMB1:PSMC4:PSMA4:CUL1:PSMC5:PSME1:PSMD5:PSMD8:PSMC6:PSMA3:PSMB5:PSME2:PSMA7:PSMD7:PSMD3:PSMD11:PSMD14:PSMF1:PSMB2:PSMA1:PSME3:CDK4:PSMB7:PSMB6:PSMA5:PSMD4:PSMB4:PSMC2:PSMD6:PSMC3:UBB:PSMD1:PSMD2:PSMD13:PSMD12:PSMB10:UBA52:PSMB9:PSMB3
REACTOME_DEGRADATION_OF_GLI1_BY_THE_PROTEASOME	39	10	60	1.04577e-18	3.64562e-17	16.4382	PSMB1:PSMC4:PSMA4:CUL1:PSMC5:PSME1:PSMD5:PSMD8:RBX1:PSMC6:PSMA3:PSMB5:PSME2:PSMA7:PSMD7:PSMD3:PSMD11:PSMD14:PSMF1:PSMB2:PSMA1:PSME3:PSMB7:PSMB6:PSMA5:PSMD4:PSMB4:PSMC2:PSMD6:PSMC3:UBB:PSMD1:PSMD2:PSMD13:PSMD12:PSMB10:UBA52:PSMB9:PSMB3
REACTOME_CROSS_PRESENTATION_OF_SOLUBLE_EXOGENOUS_ANTIGENS_ENDOSOMES	35	8	50	1.07487e-18	3.66187e-17	16.4363	PSMB1:PSMC4:PSMA4:PSMC5:PSME1:PSMD5:PSMD8:PSMC6:PSMA3:PSMB5:PSME2:PSMA7:PSMD7:PSMD3:PSMD11:PSMD14:PSMF1:PSMB2:PSMA1:PSME3:PSMB7:PSMB6:PSMA5:PSMD4:PSMB4:PSMC2:PSMD6:PSMC3:PSMD1:PSMD2:PSMD13:PSMD12:PSMB10:PSMB9:PSMB3
REACTOME_DEGRADATION_OF_AXIN	37	9	55	1.15524e-18	3.84822e-17	16.4147	PSMB1:PSMC4:PSMA4:PSMC5:PSME1:PSMD5:PSMD8:PSMC6:PSMA3:PSMB5:PSME2:PSMA7:PSMD7:PSMD3:PSMD11:PSMD14:PSMF1:PSMB2:PSMA1:PSME3:PSMB7:PSMB6:PSMA5:PSMD4:PSMB4:PSMC2:PSMD6:PSMC3:UBB:PSMD1:PSMD2:PSMD13:PSMD12:PSMB10:UBA52:PSMB9:PSMB3
REACTOME_RNA_POLYMERASE_II_TRANSCRIPTION_TERMINATION	41	11	66	1.94448e-18	6.33646e-17	16.1982	U2AF2:CPSF1:PAPOLA:SNRPD3:POLDIP3:THOC5:PABPN1:CSTF1:CSTF2:CASC3:MAGOHB:SRSF9:SRSF3:SRSF4:DDX39A:UPF3B:SYMPK:SNRPB:THOC6:SRRM1:SRSF1:NCBP1:SNRPF:DHX38:EIF4A3:SNRPG:FIP1L1:CPSF7:LSM11:U2AF1:CPSF4:SRSF2:MAGOH:THOC7:CPSF2:NUDT21:CLP1:LSM10:SNRPE:ALYREF:RNPS1
REACTOME_REGULATION_OF_PTEN_STABILITY_AND_ACTIVITY	42	11	69	2.44162e-18	7.7872e-17	16.1086	PSMB1:PSMC4:PSMA4:CSNK2A2:PSMC5:PSME1:PSMD5:PSMD8:PSMC6:PSMA3:PSMB5:PSME2:PSMA7:CSNK2A1:PSMD7:AKT2:PSMD3:PSMD11:PSMD14:PSMF1:PSMB2:PSMA1:PSME3:PSMB7:PSMB6:PSMA5:PSMD4:PSMB4:PSMC2:PSMD6:PSMC3:UBB:PSMD1:PSMD2:PSMD13:PSMD12:CSNK2B:TRIM27:PSMB10:UBA52:PSMB9:PSMB3
REACTOME_PTEN_REGULATION	64	22	138	4.07121e-18	1.27141e-16	15.8957	KDM1A:PSMB1:SCMH1:PSMC4:RRAGD:PSMA4:CSNK2A2:MBD3:PSMC5:PSME1:PSMD5:PSMD8:MAPK1:PSMC6:PSMA3:PSMB5:PSME2:PSMA7:CSNK2A1:RBBP7:PSMD7:AKT2:EZH2:PSMD3:PSMD11:ATN1:PSMD14:RNF2:PSMF1:PSMB2:PSMA1:PSME3:LAMTOR5:PSMB7:TP53:PSMB6:PSMA5:MTA2:RRAGA:PSMD4:PSMB4:PSMC2:RBBP4:PSMD6:PSMC3:GATAD2A:MLST8:UBB:PSMD1:PSMD2:SUZ12:MAF1:MTA1:CBX6:PSMD13:PSMD12:MTOR:RING1:CSNK2B:TRIM27:PSMB10:UBA52:PSMB9:PSMB3
REACTOME_RNA_POLYMERASE_II_PRE_TRANSCRIPTION_EVENTS	47	14	84	4.29824e-18	1.31491e-16	15.8811	PAF1:MNAT1:POLR2B:TAF2:TAF11:CCNK:SUPT16H:POLR2E:POLR2F:NELFCD:POLR2C:POLR2I:SUPT6H:GTF2H1:GTF2H3:TBP:GTF2F1:MLLT1:CDK7:CDK9:NCBP1:RTF1:GTF2B:GTF2A2:WDR61:POLR2D:GTF2H2:POLR2K:TAF5:SSRP1:GTF2E1:ERCC3:IWS1:POLR2H:TAF10:LEO1:POLR2L:POLR2A:NELFA:TCEA1:GTF2F2:NELFB:SUPT5H:GTF2E2:CTR9:NELFE:SUPT4H1
REACTOME_SWITCHING_OF_ORIGINS_TO_A_POST_REPLICATIVE_STATE	49	15	90	4.44424e-18	1.33238e-16	15.8754	PSMB1:PSMC4:PSMA4:CUL1:PSMC5:ANAPC5:PSME1:CDC23:PSMD5:PSMD8:RBX1:PSMC6:PSMA3:PSMB5:PSME2:PSMA7:PSMD7:PSMD3:PSMD11:PSMD14:ORC2:PSMF1:PSMB2:PSMA1:CDC16:PSME3:PSMB7:ANAPC11:PSMB6:PSMA5:ANAPC1:PSMD4:PSMB4:PSMC2:PSMD6:ANAPC10:PSMC3:UBE2E1:UBB:PSMD1:PSMD2:CDC26:PSMD13:ANAPC7:PSMD12:PSMB10:UBA52:PSMB9:PSMB3
REACTOME_DISEASE	273	171	1075	4.95499e-18	1.45638e-16	15.8367	DPM1:SLC25A5:AGK:PSMB1:VTA1:PSMC4:MNAT1:NUP160:ALG1:RPL26L1:PSMA4:POLR2B:CUL1:NDC1:TAF2:TAF11:IPO5:NUP133:ACTB:NFKB2:ARAF:XRCC5:HSP90AA1:XPO1:RPS5:CHMP2B:SEH1L:POMGNT1:PSMC5:FKBP1A:RPLP0:PEBP1:CCNK:PSME1:SUPT16H:NUP50:PSMD5:NUP188:HSP90AB1:JAK2:PSMD8:POLR2E:RANBP1:MAPK1:POLR2F:AP1B1:RBX1:RANGAP1:PSMC6:PSMA3:SNW1:PSMB5:PABPN1:PSME2:RAE1:NELFCD:PSMA7:CHMP4B:AHCY:KPNA3:NUP93:POLR2C:PSMD7:AKT2:POLR2I…
REACTOME_REGULATION_OF_RUNX2_EXPRESSION_AND_ACTIVITY	43	12	73	6.26037e-18	1.80467e-16	15.7436	PSMB1:PSMC4:PSMA4:CUL1:CBFB:PSMC5:PSME1:PSMD5:PSMD8:RBX1:PSMC6:PSMA3:PSMB5:PSME2:PSMA7:PSMD7:PSMD3:PSMD11:PSMD14:STAT1:PSMF1:PSMB2:PSMA1:PSME3:PSMB7:PSMB6:PSMA5:PPARGC1B:PSMD4:PSMB4:PSMC2:PSMD6:PSMC3:UBB:ESRRA:PSMD1:PSMD2:PSMD13:PSMD12:PSMB10:UBA52:PSMB9:PSMB3
REACTOME_CLEC7A_DECTIN_1_SIGNALING	52	16	100	7.31546e-18	2.06903e-16	15.6842	MAP3K14:PSMB1:PSMC4:PSMA4:CUL1:FBXW11:NFKB2:PSMC5:PSME1:PSMD5:PSMD8:PSMC6:PSMA3:PSMB5:PSME2:PSMA7:PSMD7:PPP3CB:PSMD3:PSMD11:PSMD14:IL1B:PSMF1:PSMB2:PSMA1:NFATC1:PSME3:UBE2D2:PSMB7:PDPK1:PSMB6:PSMA5:TAB3:PSMD4:PSMB4:PSMC2:PSMD6:PSMC3:AHCYL1:UBB:PSMD1:PSMD2:UBE2N:PSMD13:PSMD12:PSMB10:CHUK:PPP3R1:UBA52:PSMB9:IKBKG:PSMB3
REACTOME_MITOTIC_METAPHASE_AND_ANAPHASE	81	32	201	9.8854e-18	2.74411e-16	15.5616	PSMB1:PSMC4:VRK2:NUP160:PSMA4:NUP133:SMC1A:XPO1:SEH1L:ZW10:PSMC5:ANAPC5:NUDC:PSME1:CDC23:PSMD5:PSMD8:RANGAP1:PSMC6:PSMA3:PSMB5:PSME2:PSMA7:MAPRE1:EMD:PSMD7:PPP2R1A:SMC3:PSMD3:PSMD11:NUP98:NUP107:FBXO5:PPP2CA:PSMD14:STAG1:PDS5A:NUP85:PSMF1:PSMB2:PSMA1:CDC16:PSME3:PSMB7:PPP2R1B:ANAPC11:PSMB6:PSMA5:DYNC1LI1:ANAPC1:PPP2R5E:BUB3:SEC13:PSMD4:PSMB4:PMF1:PSMC2:PSMD6:ANAPC10:PTTG1:PSMC3:TUBA1C:UBE2E1:UBB:…
REACTOME_NUCLEAR_IMPORT_OF_REV_PROTEIN	27	6	34	1.64432e-17	4.48151e-16	15.3486	NUP160:NDC1:NUP133:SEH1L:NUP50:NUP188:RAE1:NUP93:KPNB1:NUP88:NUP98:NUP107:NUP155:NUP153:NUP85:NUP214:RAN:NUPL2:NUP54:NUP205:SEC13:NUP35:RCC1:NPM1:POM121:NUP62:POM121C
REACTOME_SIGNALING_BY_ROBO_RECEPTORS	85	35	218	1.88081e-17	5.03454e-16	15.298	PSMB1:PSMC4:RPL26L1:PSMA4:RHOA:CDC42:RPS5:PSMC5:RPLP0:PSME1:PSMD5:PSMD8:RBX1:PSMC6:PSMA3:PSMB5:PSME2:PSMA7:PSMD7:RPS19:PPP3CB:CUL2:PSMD3:CASC3:PSMD11:RPS13:MAGOHB:RPL24:EIF4G1:PSMD14:RPS15:RPL5:UPF3B:RPL23:PSMF1:PSMB2:PSMA1:RPL36:PAK4:PSME3:RPL27:PSMB7:NCBP1:RPL35:RPLP1:RPS24:EIF4A3:PSMB6:RPS8:PSMA5:RPL7A:FAU:UPF2:PSMD4:PSMB4:RPL8:PSMC2:RPL29:MAGOH:RPL22L1:PSMD6:PSMC3:RPL27A:RPSA:UBB:RPS9:RPS21:R…
REACTOME_RNA_POLYMERASE_II_TRANSCRIPTION_ELONGATION	38	10	61	2.56195e-17	6.73748e-16	15.1715	PAF1:MNAT1:POLR2B:CCNK:SUPT16H:POLR2E:POLR2F:NELFCD:POLR2C:POLR2I:SUPT6H:GTF2H1:GTF2H3:GTF2F1:MLLT1:CDK7:CDK9:NCBP1:RTF1:WDR61:POLR2D:GTF2H2:POLR2K:SSRP1:ERCC3:IWS1:POLR2H:LEO1:POLR2L:POLR2A:NELFA:TCEA1:GTF2F2:NELFB:SUPT5H:CTR9:NELFE:SUPT4H1
REACTOME_THE_ROLE_OF_GTSE1_IN_G2_M_PROGRESSION_AFTER_G2_CHECKPOINT	44	13	78	2.88182e-17	7.44801e-16	15.128	PSMB1:PSMC4:PSMA4:HSP90AA1:PSMC5:PSME1:PSMD5:HSP90AB1:PSMD8:PSMC6:PSMA3:PSMB5:PSME2:PSMA7:MAPRE1:PSMD7:PSMD3:PSMD11:PSMD14:PSMF1:PSMB2:PSMA1:PSME3:CCNB1:PSMB7:TP53:PSMB6:PSMA5:PSMD4:PSMB4:PSMC2:PSMD6:PSMC3:TUBA1C:UBB:PSMD1:PSMD2:PSMD13:TUBB4B:PSMD12:PSMB10:UBA52:PSMB9:PSMB3
REACTOME_SUMOYLATION_OF_SUMOYLATION_PROTEINS	27	6	35	6.98244e-17	1.77401e-15	14.751	NUP160:NDC1:NUP133:SEH1L:NUP50:NUP188:RAE1:NUP93:UBE2I:PIAS4:NUP88:NUP98:NUP107:NUP155:SUMO1:NUP153:NUP85:NUP214:NUPL2:NUP54:NUP205:SEC13:NUP35:SUMO2:POM121:NUP62:POM121C
REACTOME_HEDGEHOG_LIGAND_BIOGENESIS	39	11	65	7.15463e-17	1.78747e-15	14.7478	PSMB1:PSMC4:PSMA4:PSMC5:PSME1:PSMD5:PSMD8:PSMC6:PSMA3:PSMB5:PSME2:PSMA7:PSMD7:PSMD3:PSMD11:PSMD14:PSMF1:PSMB2:PSMA1:PSME3:PSMB7:PSMB6:PSMA5:PSMD4:PSMB4:PSMC2:PSMD6:VCP:PSMC3:UBB:PSMD1:PSMD2:P4HB:PSMD13:PSMD12:PSMB10:UBA52:PSMB9:PSMB3
REACTOME_REGULATION_OF_RAS_BY_GAPS	40	11	68	8.35187e-17	2.05237e-15	14.6877	PSMB1:PSMC4:PSMA4:PSMC5:PSME1:PSMD5:PSMD8:RBX1:PSMC6:PSMA3:PSMB5:PSME2:PSMA7:PSMD7:PSMD3:PSMD11:PSMD14:PSMF1:PSMB2:PSMA1:PSME3:PSMB7:PSMB6:PSMA5:PSMD4:PSMB4:PSMC2:PSMD6:PSMC3:UBB:PSMD1:HRAS:PSMD2:PSMD13:PSMD12:PSMB10:NRAS:UBA52:PSMB9:PSMB3
REACTOME_EXPORT_OF_VIRAL_RIBONUCLEOPROTEINS_FROM_NUCLEUS	26	6	33	8.67123e-17	2.09648e-15	14.6785	NUP160:NDC1:NUP133:XPO1:SEH1L:NUP50:NUP188:RAE1:NUP93:NUP88:NUP98:NUP107:NUP155:NUP153:NUP85:NUP214:RAN:NUPL2:NUP54:NUP205:SEC13:NUP35:POM121:HSPA1A:NUP62:POM121C
REACTOME_MRNA_SPLICING_MINOR_PATHWAY	34	9	52	9.88794e-17	2.3527e-15	14.6284	POLR2B:SNRNP40:YBX1:SF3B2:POLR2E:SNRPD3:POLR2F:POLR2C:POLR2I:EFTUD2:GTF2F1:SNRPD2:SNRPB:SRSF1:NCBP1:SNRPF:TXNL4A:SF3B4:SNRPG:SNRNP200:POLR2D:POLR2K:SRSF2:POLR2H:SNRPD1:SF3B5:PRPF8:DDX23:POLR2L:POLR2A:SNRPE:GTF2F2:SF3B3:DDX42
REACTOME_M_PHASE	125	63	392	2.27638e-16	5.3317e-15	14.2731	PSMB1:PSMC4:VRK2:NUP160:PSMA4:NDC1:NUP133:CSNK2A2:SMC1A:HSP90AA1:XPO1:SEH1L:ZW10:PSMC5:ANAPC5:NUDC:PSME1:NUP50:CDC23:PSMD5:NUP188:PSMD8:MAPK1:RANGAP1:PSMC6:PSMA3:PSMB5:PSME2:RAE1:PSMA7:CSNK2A1:MAPRE1:LPIN2:EMD:NUP93:PSMD7:CCP110:PPP2R1A:SMC3:PSMD3:NUP88:PSMD11:YWHAE:NUP98:NUP107:FBXO5:NUP155:PPP2CA:PSMD14:STAG1:SET:PDS5A:NUP153:NUP85:PSMF1:PSMB2:TUBGCP3:NUP214:ARPP19:PSMA1:CDC16:PSME3:H3F3B:CCNB1…
REACTOME_TRANSPORT_OF_MATURE_MRNAS_DERIVED_FROM_INTRONLESS_TRANSCRIPTS	30	7	43	2.66821e-16	6.15329e-15	14.2109	NUP160:NDC1:NUP133:CPSF1:SEH1L:NUP50:NUP188:RAE1:NUP93:NUP88:NUP98:NUP107:NUP155:NUP153:NUP85:SYMPK:NUP214:NUPL2:NCBP1:NUP54:FIP1L1:NUP205:SEC13:CPSF4:NUP35:CPSF2:ALYREF:POM121:NUP62:POM121C
REACTOME_CELLULAR_RESPONSE_TO_HEAT_STRESS	50	17	101	4.43252e-16	1.00672e-14	13.9971	FKBP4:NUP160:NDC1:NUP133:HSP90AA1:SEH1L:NUP50:NUP188:HSP90AB1:MAPK1:ST13:RAE1:NUP93:NUP88:YWHAE:HSPA8:NUP98:PTGES3:NUP107:MRPL18:HSPA9:NUP155:HSPH1:NUP153:NUP85:NUP214:NUPL2:NUP54:NUP205:BAG4:SEC13:CCAR2:MAPKAPK2:NUP35:VCP:MLST8:DNAJC7:UBB:HSPA4:ATR:HSF1:RPS19BP1:HSPA14:POM121:MTOR:HSPA1B:HSPA1A:NUP62:HSBP1:POM121C
REACTOME_PCP_CE_PATHWAY	47	15	92	6.06405e-16	1.35672e-14	13.8675	DVL2:PSMB1:PSMC4:PSMA4:RHOA:PSMC5:PSME1:PSMD5:PSMD8:PSMC6:PSMA3:PSMB5:PSME2:PSMA7:PSMD7:FZD3:PSMD3:PSMD11:PSMD14:CLTA:PSMF1:PSMB2:PSMA1:PSME3:PSMB7:CLTC:PSMB6:PSMA5:PSMD4:PSMB4:PSMC2:FZD5:PSMD6:RYK:FZD6:PSMC3:UBB:PSMD1:PSMD2:CLTB:SCRIB:PSMD13:PSMD12:PSMB10:UBA52:PSMB9:PSMB3
REACTOME_SUMOYLATION_OF_UBIQUITINYLATION_PROTEINS	28	7	39	6.30971e-16	1.39092e-14	13.8567	NUP160:NDC1:NUP133:PIAS2:SEH1L:NUP50:NUP188:RAE1:NUP93:UBE2I:PIAS4:NUP88:NUP98:NUP107:NUP155:SUMO1:NUP153:NUP85:NUP214:NUPL2:NUP54:NUP205:SEC13:NUP35:POM121:TRIM27:NUP62:POM121C
REACTOME_ORC1_REMOVAL_FROM_CHROMATIN	40	12	71	7.18487e-16	1.56089e-14	13.8066	PSMB1:PSMC4:PSMA4:CUL1:PSMC5:PSME1:PSMD5:PSMD8:RBX1:PSMC6:PSMA3:PSMB5:PSME2:PSMA7:PSMD7:PSMD3:PSMD11:PSMD14:ORC2:PSMF1:PSMB2:PSMA1:PSME3:PSMB7:PSMB6:PSMA5:PSMD4:PSMB4:PSMC2:PSMD6:PSMC3:UBB:PSMD1:PSMD2:PSMD13:PSMD12:PSMB10:UBA52:PSMB9:PSMB3
REACTOME_SUMOYLATION_OF_RNA_BINDING_PROTEINS	31	8	47	1.24656e-15	2.66943e-14	13.5736	SCMH1:NUP160:NDC1:NUP133:SEH1L:HNRNPC:NUP50:NUP188:RAE1:NUP93:UBE2I:NUP88:NUP98:NUP107:NUP155:SUMO1:RNF2:NUP153:NUP85:NUP214:NUPL2:NUP54:NUP205:SEC13:NUP35:HNRNPK:SUMO2:POM121:RING1:NUP62:POM121C
REACTOME_DEGRADATION_OF_BETA_CATENIN_BY_THE_DESTRUCTION_COMPLEX	44	14	84	1.34004e-15	2.82918e-14	13.5483	PSMB1:PSMC4:PSMA4:CUL1:PSMC5:PSME1:PSMD5:PSMD8:RBX1:PSMC6:PSMA3:PSMB5:PSME2:PSMA7:PSMD7:PPP2R1A:PSMD3:PSMD11:PPP2CA:PSMD14:PSMF1:PSMB2:PSMA1:PSME3:PSMB7:PPP2R1B:PSMB6:PSMA5:PPP2R5E:PSMD4:PSMB4:PSMC2:PSMD6:PSMC3:UBB:PSMD1:PSMD2:AMER1:PSMD13:PSMD12:PSMB10:UBA52:PSMB9:PSMB3
REACTOME_CELLULAR_RESPONSE_TO_HYPOXIA	41	12	75	1.44456e-15	3.00749e-14	13.5218	PSMB1:PSMC4:PSMA4:PSMC5:PSME1:PSMD5:PSMD8:RBX1:PSMC6:PSMA3:PSMB5:PSME2:PSMA7:PSMD7:CUL2:PSMD3:PSMD11:PSMD14:PSMF1:PSMB2:PSMA1:PSME3:UBE2D2:PSMB7:PSMB6:PSMA5:PSMD4:PSMB4:PSMC2:PSMD6:PSMC3:UBB:PSMD1:PSMD2:HIGD1A:PSMD13:PSMD12:PSMB10:UBA52:PSMB9:PSMB3
REACTOME_FORMATION_OF_THE_EARLY_ELONGATION_COMPLEX	25	6	33	1.8188e-15	3.73476e-14	13.4277	MNAT1:POLR2B:POLR2E:POLR2F:NELFCD:POLR2C:POLR2I:GTF2H1:GTF2H3:GTF2F1:CDK7:NCBP1:POLR2D:GTF2H2:POLR2K:ERCC3:POLR2H:POLR2L:POLR2A:NELFA:GTF2F2:NELFB:SUPT5H:NELFE:SUPT4H1
REACTOME_CYCLIN_A:CDK2_ASSOCIATED_EVENTS_AT_S_PHASE_ENTRY	44	14	85	2.41626e-15	4.89457e-14	13.3103	PSMB1:PSMC4:MNAT1:PSMA4:CUL1:PSMC5:PSME1:PSMD5:PSMD8:PSMC6:PSMA3:PSMB5:PSME2:PSMA7:PSMD7:AKT2:PSMD3:PSMD11:PSMD14:PSMF1:PSMB2:PSMA1:PSME3:CDK7:CDK4:PSMB7:PSMB6:PSMA5:PSMD4:PSMB4:PSMC2:RBBP4:PSMD6:PSMC3:UBB:PSMD1:PSMD2:PSMD13:PSMD12:PSMB10:E2F4:UBA52:PSMB9:PSMB3
REACTOME_SIGNALING_BY_NOTCH4	43	13	82	2.56657e-15	5.06222e-14	13.2957	PSMB1:PSMC4:PSMA4:CUL1:PSMC5:PSME1:PSMD5:PSMD8:RBX1:PSMC6:PSMA3:SNW1:PSMB5:PSME2:PSMA7:PSMD7:PSMD3:PSMD11:PSMD14:PSMF1:PSMB2:PSMA1:PSME3:PSMB7:PSMB6:PSMA5:NOTCH1:PSMD4:PSMB4:PSMC2:NCSTN:PSMD6:YWHAZ:PSMC3:UBB:PSMD1:PSMD2:PSMD13:PSMD12:PSMB10:UBA52:PSMB9:PSMB3
REACTOME_REGULATION_OF_HSF1_MEDIATED_HEAT_SHOCK_RESPONSE	43	13	82	2.56657e-15	5.06222e-14	13.2957	FKBP4:NUP160:NDC1:NUP133:SEH1L:NUP50:NUP188:MAPK1:ST13:RAE1:NUP93:NUP88:YWHAE:HSPA8:NUP98:NUP107:MRPL18:HSPA9:NUP155:HSPH1:NUP153:NUP85:NUP214:NUPL2:NUP54:NUP205:BAG4:SEC13:CCAR2:MAPKAPK2:NUP35:DNAJC7:UBB:HSPA4:ATR:HSF1:RPS19BP1:HSPA14:POM121:HSPA1B:HSPA1A:NUP62:POM121C
REACTOME_TRANSCRIPTION_OF_THE_HIV_GENOME	40	12	73	2.74146e-15	5.33695e-14	13.2727	MNAT1:POLR2B:TAF2:TAF11:CCNK:SUPT16H:POLR2E:POLR2F:NELFCD:POLR2C:POLR2I:GTF2H1:GTF2H3:RNGTT:TBP:GTF2F1:CDK7:CDK9:NCBP1:GTF2B:GTF2A2:POLR2D:GTF2H2:POLR2K:TAF5:SSRP1:GTF2E1:ERCC3:POLR2H:TAF10:POLR2L:POLR2A:NELFA:TCEA1:GTF2F2:NELFB:SUPT5H:GTF2E2:NELFE:SUPT4H1
REACTOME_INTERLEUKIN_1_FAMILY_SIGNALING	60	23	139	2.8453e-15	5.46809e-14	13.2622	PSMB1:PSMC4:PSMA4:CUL1:FBXW11:PTPN23:NFKB2:PSMC5:PSME1:PSMD5:PSMD8:RBX1:PSMC6:PSMA3:PSMB5:PSME2:PSMA7:PSMD7:RIPK2:NFKBIB:PSMD3:PSMD11:PTPN6:IL1A:PSMD14:IL1B:PSMF1:PSMB2:PSMA1:PSME3:PSMB7:PSMB6:PSMA5:PTPN7:TAB3:PSMD4:PSMB4:SQSTM1:PSMC2:PSMD6:PSMC3:NKIRAS2:STAT3:TNIP2:PTPN9:UBB:MYD88:PSMD1:PSMD2:UBE2N:PTPN11:IRAK1:PSMD13:PSMD12:PSMB10:CHUK:UBA52:PSMB9:IKBKG:PSMB3
REACTOME_ASSEMBLY_OF_THE_PRE_REPLICATIVE_COMPLEX	38	11	68	5.04529e-15	9.45361e-14	13.0244	PSMB1:PSMC4:PSMA4:PSMC5:PSME1:PSMD5:PSMD8:PSMC6:PSMA3:PSMB5:PSME2:PSMA7:PSMD7:PSMD3:PSMD11:PSMD14:ORC2:PSMF1:PSMB2:PSMA1:PSME3:PSMB7:PSMB6:PSMA5:PSMD4:PSMB4:PSMC2:PSMD6:PSMC3:UBB:PSMD1:PSMD2:PSMD13:PSMD12:PSMB10:UBA52:PSMB9:PSMB3
REACTOME_G1_S_DNA_DAMAGE_CHECKPOINTS	38	11	68	5.04529e-15	9.45361e-14	13.0244	PSMB1:PSMC4:PSMA4:PSMC5:PSME1:PSMD5:PSMD8:PSMC6:PSMA3:PSMB5:PSME2:PSMA7:PSMD7:PSMD3:PSMD11:PSMD14:PSMF1:PSMB2:PSMA1:PSME3:PSMB7:TP53:PSMB6:PSMA5:PSMD4:PSMB4:PSMC2:PSMD6:PSMC3:UBB:PSMD1:PSMD2:PSMD13:PSMD12:PSMB10:UBA52:PSMB9:PSMB3
REACTOME_ABC_TRANSPORTER_DISORDERS	41	13	77	5.11555e-15	9.46692e-14	13.0238	PSMB1:PSMC4:PSMA4:PSMC5:PSME1:PSMD5:PSMD8:PSMC6:PSMA3:PSMB5:PSME2:PSMA7:PSMD7:ERLIN1:PSMD3:PSMD11:PSMD14:PSMF1:PSMB2:PSMA1:PSME3:PSMB7:DERL1:RNF185:PSMB6:PSMA5:PSMD4:PSMB4:PSMC2:PSMD6:VCP:PSMC3:UBB:PSMD1:PSMD2:PSMD13:PSMD12:PSMB10:UBA52:PSMB9:PSMB3
REACTOME_EUKARYOTIC_TRANSLATION_INITIATION	54	20	120	6.85101e-15	1.2524e-13	12.9023	RPL26L1:EIF4B:EIF2B3:RPS5:EIF3I:RPLP0:EIF3D:EIF3E:RPS19:EIF3B:EIF4H:RPS13:EIF2B1:RPL24:EIF4G1:RPS15:EIF2B2:RPL5:RPL23:EIF2S2:RPL36:EIF2S3:EIF3G:RPL27:EIF2S1:RPL35:RPLP1:RPS24:RPS8:EIF2B5:EIF3H:RPL7A:EIF3M:FAU:RPL8:RPL29:RPL22L1:RPL27A:RPSA:RPS9:RPS21:RPS7:RPL4:RPL15:EIF3F:EIF3K:EIF4EBP1:RPL14:RPL37A:RPL12:RPL23A:RPL10A:UBA52:RPS28
REACTOME_INTERACTIONS_OF_VPR_WITH_HOST_CELLULAR_PROTEINS	26	6	37	1.41987e-14	2.56432e-13	12.591	SLC25A5:NUP160:NDC1:NUP133:SEH1L:NUP50:NUP188:RAE1:NUP93:NUP88:NUP98:NUP107:NUP155:NUP153:NUP85:NUP214:NUPL2:HMGA1:NUP54:NUP205:SEC13:NUP35:BANF1:POM121:NUP62:POM121C
REACTOME_DISORDERS_OF_TRANSMEMBRANE_TRANSPORTERS	69	29	177	1.66931e-14	2.97892e-13	12.5259	PSMB1:PSMC4:NUP160:PSMA4:NDC1:NUP133:SEH1L:PSMC5:PSME1:NUP50:PSMD5:NUP188:PSMD8:PSMC6:PSMA3:PSMB5:PSME2:RAE1:PSMA7:NUP93:PSMD7:ERLIN1:PSMD3:NUP88:PSMD11:NUP98:NUP107:NUP155:PSMD14:SLC2A1:NUP153:NUP85:PSMF1:PSMB2:NUP214:PSMA1:PSME3:NUPL2:PSMB7:DERL1:NUP54:RNF185:PSMB6:PSMA5:SLC39A4:NUP205:SEC13:PSMD4:PSMB4:PSMC2:NUP35:PSMD6:VCP:PSMC3:SLC27A4:UBB:BSG:PSMD1:PSMD2:SLC35C1:PSMD13:POM121:PSMD12:PSMB10:…
REACTOME_FORMATION_OF_TC_NER_PRE_INCISION_COMPLEX	32	9	53	2.3044e-14	4.06387e-13	12.3911	MNAT1:AQR:POLR2B:ERCC8:XAB2:POLR2E:POLR2F:RBX1:POLR2C:POLR2I:PRPF19:GTF2H1:GTF2H3:CDK7:COPS4:COPS3:POLR2D:COPS7B:GTF2H2:POLR2K:ERCC3:POLR2H:COPS2:DDB1:COPS6:GPS1:UBB:POLR2L:POLR2A:TCEA1:UBA52:ISY1
REACTOME_GENE_EXPRESSION_TRANSCRIPTION	337	236	1486	3.18162e-14	5.54563e-13	12.256	PAF1:PSMB1:BAZ1B:SCMH1:PSMC4:POLR3B:BID:MNAT1:RUNX3:RRAGD:NUP160:PSMA4:POLR2B:CUL1:NDC1:U2AF2:TAF2:TAF11:SMARCD1:NFYC:ZNRD1:CBFB:NUP133:CSNK2A2:TCF3:MBD3:CPSF1:SREBF1:SMARCE1:ACTB:HSP90AA1:SEH1L:RRN3:SRRT:BAX:PSMC5:CNOT3:PAPOLA:CCNK:PSME1:SUPT16H:NUP50:PSMD5:NUP188:PSMD8:POLR2E:POLRMT:SMARCB1:SNRPD3:MAPK1:POLR2F:POLDIP3:THOC5:RBX1:L3MBTL2:PRMT5:PSMC6:PSMA3:SNW1:DICER1:PSMB5:PABPN1:PSME2:RABGGTA:C…
REACTOME_FORMATION_OF_HIV_ELONGATION_COMPLEX_IN_THE_ABSENCE_OF_HIV_TAT	30	8	48	3.2586e-14	5.61453e-13	12.2507	MNAT1:POLR2B:CCNK:SUPT16H:POLR2E:POLR2F:NELFCD:POLR2C:POLR2I:GTF2H1:GTF2H3:GTF2F1:CDK7:CDK9:NCBP1:POLR2D:GTF2H2:POLR2K:SSRP1:ERCC3:POLR2H:POLR2L:POLR2A:NELFA:TCEA1:GTF2F2:NELFB:SUPT5H:NELFE:SUPT4H1
REACTOME_ABC_FAMILY_PROTEINS_MEDIATED_TRANSPORT	48	17	103	3.39386e-14	5.78113e-13	12.238	PSMB1:PSMC4:PEX3:PSMA4:PSMC5:PSME1:PSMD5:PSMD8:PSMC6:PSMA3:PSMB5:PSME2:PSMA7:PSMD7:ERLIN1:PSMD3:PSMD11:PSMD14:ABCD3:PSMF1:EIF2S2:PSMB2:PSMA1:EIF2S3:ABCB7:PSME3:EIF2S1:PSMB7:DERL1:RNF185:PSMB6:PSMA5:PSMD4:PSMB4:PSMC2:PSMD6:VCP:PSMC3:UBB:PSMD1:PSMD2:PSMD13:PSMD12:ABCF1:PSMB10:UBA52:PSMB9:PSMB3
REACTOME_HOST_INTERACTIONS_WITH_INFLUENZA_FACTORS	28	7	43	4.0468e-14	6.8159e-13	12.1665	NUP160:NDC1:NUP133:SEH1L:NUP50:NUP188:PABPN1:RAE1:KPNA3:NUP93:TGFB1:KPNB1:NUP88:NUP98:NUP107:NUP155:NUP153:NUP85:NUP214:NUPL2:NUP54:NUP205:SEC13:CPSF4:NUP35:POM121:NUP62:POM121C
REACTOME_TRANSPORT_OF_THE_SLBP_DEPENDANT_MATURE_MRNA	25	6	36	6.63686e-14	1.10541e-12	11.9565	NUP160:NDC1:NUP133:SEH1L:NUP50:NUP188:RAE1:NUP93:NUP88:NUP98:NUP107:NUP155:NUP153:NUP85:NUP214:NUPL2:NCBP1:NUP54:NUP205:SEC13:NUP35:ALYREF:POM121:NUP62:POM121C
REACTOME_CELL_CYCLE	172	102	642	8.60279e-14	1.4171e-12	11.8486	DBF4:PSMB1:PSMC4:MNAT1:VRK2:NUP160:PSMA4:CUL1:NDC1:TP53BP1:NUP133:CSNK2A2:SMC1A:FBXW11:HSP90AA1:XPO1:SEH1L:ZW10:PSMC5:ANAPC5:NUDC:PSME1:NUP50:CDC23:PSMD5:NUP188:HSP90AB1:JAK2:PSMD8:MAPK1:RBX1:RANGAP1:PSMC6:PSMA3:PSMB5:PSME2:RAE1:PSMA7:CSNK2A1:MAPRE1:LPIN2:RBBP8:RBBP7:EMD:NUP93:PSMD7:UBE2I:CCP110:NBN:AKT2:PIAS4:PPP2R1A:POLD2:SMC3:PSMD3:NUP88:PSMD11:YWHAE:NUP98:NUP107:FBXO5:RAD1:NUP155:PPP2CA:PSMD1…
REACTOME_ABORTIVE_ELONGATION_OF_HIV_1_TRANSCRIPT_IN_THE_ABSENCE_OF_TAT	19	4	23	9.83766e-14	1.6029e-12	11.7951	POLR2B:POLR2E:POLR2F:NELFCD:POLR2C:POLR2I:GTF2F1:NCBP1:POLR2D:POLR2K:POLR2H:POLR2L:POLR2A:NELFA:GTF2F2:NELFB:SUPT5H:NELFE:SUPT4H1
REACTOME_UCH_PROTEINASES	47	17	102	1.04409e-13	1.68289e-12	11.7739	PSMB1:PSMC4:PSMA4:ACTB:PSMC5:PSME1:PSMD5:PSMD8:PSMC6:PSMA3:PSMB5:PSME2:PSMA7:PSMD7:TGFB1:PSMD3:PSMD11:PSMD14:UCHL5:PSMF1:PSMB2:PSMA1:ADRM1:PSME3:ACTL6A:PSMB7:PSMB6:PSMA5:INO80C:PSMD4:PSMB4:PSMC2:PSMD6:BAP1:PSMC3:UBB:HCFC1:PSMD1:PSMD2:RUVBL1:PSMD13:MCRS1:PSMD12:PSMB10:UBA52:PSMB9:PSMB3
REACTOME_DEFECTIVE_TPR_MAY_CONFER_SUSCEPTIBILITY_TOWARDS_THYROID_PAPILLARY_CARCINOMA_TPC	23	6	32	1.55831e-13	2.485e-12	11.6047	NUP160:NDC1:NUP133:SEH1L:NUP50:NUP188:RAE1:NUP93:NUP88:NUP98:NUP107:NUP155:NUP153:NUP85:NUP214:NUPL2:NUP54:NUP205:SEC13:NUP35:POM121:NUP62:POM121C
REACTOME_GLYCOLYSIS	37	12	72	4.12857e-13	6.51446e-12	11.1861	NUP160:NDC1:PKM:NUP133:ENO1:SEH1L:NUP50:NUP188:RAE1:PGK1:NUP93:GPI:PPP2R1A:ENO3:NUP88:NUP98:NUP107:TPI1:GNPDA1:NUP155:PPP2CA:NUP153:NUP85:NUP214:NUPL2:PPP2R1B:NUP54:ALDOA:NUP205:SEC13:HK2:NUP35:GNPDA2:PGAM1:POM121:NUP62:POM121C
REACTOME_NONSENSE_MEDIATED_DECAY_NMD	50	19	116	5.00371e-13	7.81308e-12	11.1072	UPF1:RPL26L1:RPS5:RPLP0:RPS19:PPP2R1A:SMG9:CASC3:RPS13:MAGOHB:PPP2CA:RPL24:EIF4G1:RPS15:SMG7:RPL5:UPF3B:RPL23:RPL36:RPL27:NCBP1:RPL35:RPLP1:RPS24:EIF4A3:RPS8:RPL7A:FAU:UPF2:RPL8:RPL29:MAGOH:RPL22L1:RPL27A:SMG8:RPSA:RPS9:RPS21:RPS7:RPL4:RPL15:RPL14:RPL37A:RPL12:RPL23A:RPL10A:SMG5:RNPS1:UBA52:RPS28
REACTOME_SUMOYLATION_OF_DNA_REPLICATION_PROTEINS	28	8	46	5.5351e-13	8.55373e-12	11.0678	NUP160:NDC1:NUP133:SEH1L:NUP50:NUP188:RANGAP1:RAE1:NUP93:UBE2I:PIAS4:NUP88:NUP98:NUP107:NUP155:SUMO1:NUP153:NUP85:NUP214:NUPL2:NUP54:NUP205:SEC13:NUP35:SUMO2:POM121:NUP62:POM121C
REACTOME_ANTIGEN_PROCESSING_CROSS_PRESENTATION	45	16	99	6.07962e-13	9.29933e-12	11.0315	PSMB1:PSMC4:PSMA4:SEC61A1:PSMC5:PSME1:PSMD5:PSMD8:PSMC6:PSMA3:PSMB5:PSME2:PSMA7:PSMD7:PSMD3:PSMD11:PSMD14:PSMF1:PSMB2:PSMA1:PSME3:PSMB7:PSMB6:PSMA5:PSMD4:PSMB4:PSMC2:PSMD6:PSMC3:TAP1:UBB:MYD88:PSMD1:PSMD2:CALR:PSMD13:PSMD12:TAP2:PSMB10:CHUK:UBA52:TAPBP:PSMB9:IKBKG:PSMB3
REACTOME_HEDGEHOG_ON_STATE	41	14	86	7.57478e-13	1.14693e-11	10.9405	PSMB1:PSMC4:PSMA4:CDON:PSMC5:PSME1:PSMD5:PSMD8:RBX1:PSMC6:PSMA3:PSMB5:PSME2:PSMA7:PSMD7:PSMD3:PSMD11:PSMD14:PSMF1:PSMB2:PSMA1:PSME3:PSMB7:ULK3:PSMB6:PSMA5:SPOPL:PSMD4:PSMB4:PSMC2:PSMD6:PSMC3:UBB:PSMD1:PSMD2:PSMD13:PSMD12:PSMB10:UBA52:PSMB9:PSMB3
REACTOME_NUCLEOTIDE_EXCISION_REPAIR	48	18	110	7.83885e-13	1.17504e-11	10.9299	MNAT1:AQR:POLR2B:ERCC8:ACTB:XAB2:POLR2E:POLR2F:RBX1:POLR2C:UBE2I:POLR2I:POLD2:PRPF19:GTF2H1:GTF2H3:SUMO1:RAD23B:USP45:CDK7:ACTL6A:COPS4:COPS3:POLR2D:COPS7B:GTF2H2:POLR2K:POLE3:INO80C:ERCC3:POLR2H:COPS2:DDB1:COPS6:UBE2V2:GPS1:UBB:ERCC4:RUVBL1:POLR2L:UBE2N:RAD23A:POLR2A:TCEA1:MCRS1:SUMO2:UBA52:ISY1
REACTOME_NUCLEAR_PORE_COMPLEX_NPC_DISASSEMBLY	24	6	36	8.53699e-13	1.26703e-11	10.8972	NUP160:NDC1:NUP133:SEH1L:NUP50:NUP188:RAE1:NUP93:NUP88:NUP98:NUP107:NUP155:NUP153:NUP85:NUP214:CCNB1:NUPL2:NUP54:NUP205:SEC13:NUP35:POM121:NUP62:POM121C
REACTOME_TNFR2_NON_CANONICAL_NF_KB_PATHWAY	45	16	100	9.55362e-13	1.40401e-11	10.8526	MAP3K14:PSMB1:PSMC4:PSMA4:CUL1:FBXW11:NFKB2:PSMC5:PSME1:PSMD5:PSMD8:PSMC6:PSMA3:PSMB5:PSME2:PSMA7:PSMD7:PSMD3:PSMD11:PSMD14:PSMF1:PSMB2:TRAF2:PSMA1:PSME3:PSMB7:PSMB6:PSMA5:PSMD4:PSMB4:PSMC2:PSMD6:PSMC3:UBB:PSMD1:PSMD2:TNFSF15:PSMD13:PSMD12:PSMB10:CHUK:UBA52:LTA:PSMB9:PSMB3
REACTOME_MRNA_CAPPING	21	5	29	1.11241e-12	1.60337e-11	10.795	MNAT1:POLR2B:POLR2E:POLR2F:POLR2C:POLR2I:GTF2H1:GTF2H3:RNGTT:GTF2F1:CDK7:NCBP1:POLR2D:GTF2H2:POLR2K:ERCC3:POLR2H:POLR2L:POLR2A:GTF2F2:SUPT5H
REACTOME_ANTIGEN_PROCESSING:_UBIQUITINATION_PROTEASOME_DEGRADATION	97	49	308	1.11228e-12	1.60337e-11	10.795	PSMB1:UBE3C:PSMC4:RNF14:UBA6:PSMA4:CUL1:RNF4:BTBD1:FBXW11:UBE2A:UBE2K:UBE2D4:KEAP1:HUWE1:PSMC5:ANAPC5:PSME1:CDC23:PSMD5:PSMD8:RBX1:PSMC6:PSMA3:PSMB5:PSME2:PSMA7:PSMD7:CUL2:UBE2S:PSMD3:TRIM37:PSMD11:UBE4A:RNF7:PSMD14:FBXO6:RBBP6:PSMF1:RBCK1:PSMB2:UBR4:RNF6:ANAPC13:PSMA1:CDC16:UBA1:PSME3:UBE2D2:TRAF7:FBXW9:TRIM21:UBE2G1:RNF138:PSMB7:NPEPPS:ANAPC11:PSMB6:PSMA5:ASB6:ANAPC1:UBE2L6:UBE2Z:PSMD4:PSMB4:UB…
REACTOME_MITOTIC_G2_G2_M_PHASES	71	32	199	1.32244e-12	1.88795e-11	10.724	PSMB1:PSMC4:MNAT1:PSMA4:CUL1:FBXW11:HSP90AA1:XPO1:PSMC5:PSME1:PSMD5:HSP90AB1:PSMD8:RBX1:PSMC6:PSMA3:PSMB5:PSME2:PSMA7:MAPRE1:PSMD7:CCP110:PPP2R1A:PSMD3:PSMD11:YWHAE:PPP2CA:PSMD14:PSMF1:PSMB2:TUBGCP3:PSMA1:PSME3:CCNB1:CDK7:BORA:ODF2:PSMB7:PPP2R1B:HAUS2:TUBGCP4:ACTR1A:TP53:PSMB6:PSMA5:HAUS6:PSMD4:PSMB4:PSMC2:RBBP4:PSMD6:PSMC3:TUBA1C:YWHAG:UBB:PSMD1:PSMD2:CKAP5:SSNA1:PSMD13:TUBB4B:PSMD12:MZT1:PSMB10…
REACTOME_DOWNSTREAM_TCR_SIGNALING	45	17	101	1.48873e-12	2.10528e-11	10.6767	PSMB1:PSMC4:PSMA4:CUL1:FBXW11:PSMC5:PSME1:PSMD5:PSMD8:PSMC6:PSMA3:PSMB5:PSME2:PSMA7:PSMD7:RIPK2:PSMD3:PSMD11:PSMD14:PSMF1:PSMB2:PSMA1:PSME3:UBE2D2:PSMB7:PDPK1:PSMB6:PSMA5:PSMD4:PSMB4:PSMC2:PSMD6:PSMC3:UBB:PSMD1:PSMD2:UBE2N:PSMD13:PSMD12:PSMB10:CHUK:UBA52:PSMB9:IKBKG:PSMB3
REACTOME_MITOCHONDRIAL_PROTEIN_IMPORT	34	11	65	1.61132e-12	2.25735e-11	10.6464	SLC25A13:CS:BCS1L:TIMM21:TIMM13:HSCB:TOMM22:SAMM50:ACO2:TIMM9:CMC2:TIMM44:TIMM50:PMPCB:CHCHD2:HSPA9:MTX2:TOMM40:TIMM17A:TIMM10:HSPD1:TIMM8B:CHCHD4:GRPEL2:FXN:PMPCA:COA6:COQ2:MTX1:TIMM22:CYC1:COA4:VDAC1:TIMM23
REACTOME_CELL_CYCLE_MITOTIC	146	85	536	1.72719e-12	2.39727e-11	10.6203	DBF4:PSMB1:PSMC4:MNAT1:VRK2:NUP160:PSMA4:CUL1:NDC1:NUP133:CSNK2A2:SMC1A:FBXW11:HSP90AA1:XPO1:SEH1L:ZW10:PSMC5:ANAPC5:NUDC:PSME1:NUP50:CDC23:PSMD5:NUP188:HSP90AB1:JAK2:PSMD8:MAPK1:RBX1:RANGAP1:PSMC6:PSMA3:PSMB5:PSME2:RAE1:PSMA7:CSNK2A1:MAPRE1:LPIN2:EMD:NUP93:PSMD7:CCP110:AKT2:PPP2R1A:POLD2:SMC3:PSMD3:NUP88:PSMD11:YWHAE:NUP98:NUP107:FBXO5:NUP155:PPP2CA:PSMD14:ORC2:STAG1:CCND2:SET:PDS5A:NUP153:NUP85…
REACTOME_S_PHASE	61	26	161	2.14767e-12	2.95354e-11	10.5297	PSMB1:PSMC4:MNAT1:PSMA4:CUL1:SMC1A:PSMC5:ANAPC5:PSME1:CDC23:PSMD5:PSMD8:RBX1:PSMC6:PSMA3:PSMB5:PSME2:PSMA7:PSMD7:AKT2:POLD2:SMC3:PSMD3:PSMD11:PSMD14:ORC2:STAG1:PDS5A:PSMF1:PSMB2:PSMA1:CDC16:PSME3:CDK7:CDK4:PSMB7:ANAPC11:PSMB6:PSMA5:POLE3:ANAPC1:PSMD4:PSMB4:PSMC2:RBBP4:PSMD6:ANAPC10:PSMC3:UBE2E1:UBB:PSMD1:PSMD2:CDC26:PSMD13:ANAPC7:PSMD12:PSMB10:E2F4:UBA52:PSMB9:PSMB3
REACTOME_DNA_REPLICATION	52	21	127	2.18528e-12	2.97793e-11	10.5261	DBF4:PSMB1:PSMC4:PSMA4:CUL1:PSMC5:ANAPC5:PSME1:CDC23:PSMD5:PSMD8:RBX1:PSMC6:PSMA3:PSMB5:PSME2:PSMA7:PSMD7:POLD2:PSMD3:PSMD11:PSMD14:ORC2:PSMF1:PSMB2:PSMA1:CDC16:PSME3:PSMB7:ANAPC11:PSMB6:PSMA5:POLE3:ANAPC1:PSMD4:PSMB4:PSMC2:PSMD6:ANAPC10:PSMC3:UBE2E1:UBB:PSMD1:PSMD2:CDC26:PSMD13:ANAPC7:PSMD12:PSMB10:UBA52:PSMB9:PSMB3
REACTOME_DNA_REPLICATION_PRE_INITIATION	40	14	85	2.38702e-12	3.22355e-11	10.4917	DBF4:PSMB1:PSMC4:PSMA4:PSMC5:PSME1:PSMD5:PSMD8:PSMC6:PSMA3:PSMB5:PSME2:PSMA7:PSMD7:PSMD3:PSMD11:PSMD14:ORC2:PSMF1:PSMB2:PSMA1:PSME3:PSMB7:PSMB6:PSMA5:POLE3:PSMD4:PSMB4:PSMC2:PSMD6:PSMC3:UBB:PSMD1:PSMD2:PSMD13:PSMD12:PSMB10:UBA52:PSMB9:PSMB3
REACTOME_CLASS_I_MHC_MEDIATED_ANTIGEN_PROCESSING_PRESENTATION	110	59	370	2.53802e-12	3.39687e-11	10.4689	PSMB1:UBE3C:PSMC4:RNF14:UBA6:PSMA4:CUL1:SEC61A1:RNF4:BTBD1:FBXW11:UBE2A:UBE2K:UBE2D4:KEAP1:HUWE1:PSMC5:ANAPC5:PSME1:CDC23:PSMD5:PSMD8:RBX1:PSMC6:PSMA3:PSMB5:PSME2:PSMA7:PSMD7:CUL2:UBE2S:PSMD3:TRIM37:PSMD11:UBE4A:RNF7:PSMD14:FBXO6:RBBP6:PSMF1:RBCK1:PSMB2:CANX:UBR4:RNF6:ANAPC13:PSMA1:CDC16:UBA1:PSME3:UBE2D2:TRAF7:FBXW9:TRIM21:UBE2G1:RNF138:PSMB7:NPEPPS:ANAPC11:PSMB6:PSMA5:ASB6:SEC24D:ANAPC1:UBE2L6:…
REACTOME_GLUCOSE_METABOLISM	42	15	92	2.69541e-12	3.57559e-11	10.4467	SLC25A13:MDH1:NUP160:NDC1:PKM:NUP133:ENO1:SEH1L:NUP50:NUP188:PCK2:RAE1:PGK1:NUP93:GPI:PPP2R1A:ENO3:NUP88:NUP98:NUP107:TPI1:GNPDA1:NUP155:PPP2CA:NUP153:GOT2:NUP85:NUP214:NUPL2:PPP2R1B:NUP54:ALDOA:NUP205:SEC13:HK2:SLC37A1:NUP35:GNPDA2:PGAM1:POM121:NUP62:POM121C
REACTOME_ANTIVIRAL_MECHANISM_BY_IFN_STIMULATED_GENES	39	13	82	2.79808e-12	3.67923e-11	10.4342	NUP160:NDC1:NUP133:EIF4G3:SEH1L:NUP50:NUP188:RAE1:KPNA3:NUP93:KPNB1:NUP88:EIF4G2:NUP98:OAS3:NUP107:NUP155:EIF4G1:STAT1:TRIM25:NUP153:NUP85:NUP214:EIF4E2:NUPL2:NUP54:EIF4A3:NUP205:UBE2L6:SEC13:NUP35:ABCE1:UBE2E1:UBB:UBE2N:POM121:NUP62:UBA52:POM121C
REACTOME_CELL_CYCLE_CHECKPOINTS	92	47	291	3.22217e-12	4.16382e-11	10.3805	DBF4:PSMB1:PSMC4:NUP160:PSMA4:TP53BP1:NUP133:XPO1:SEH1L:ZW10:PSMC5:ANAPC5:NUDC:PSME1:CDC23:PSMD5:PSMD8:RANGAP1:PSMC6:PSMA3:PSMB5:PSME2:PSMA7:MAPRE1:RBBP8:PSMD7:NBN:PIAS4:PPP2R1A:PSMD3:PSMD11:YWHAE:NUP98:NUP107:RAD1:PPP2CA:PSMD14:ORC2:SUMO1:NUP85:PSMF1:PSMB2:PSMA1:CDC16:PSME3:CCNB1:YWHAQ:PSMB7:MDC1:PPP2R1B:TP53:ANAPC11:PSMB6:PSMA5:DYNC1LI1:ANAPC1:PPP2R5E:BUB3:SEC13:PSMD4:PSMB4:PMF1:PSMC2:PSMD6:ANA…
REACTOME_PROGRAMMED_CELL_DEATH	65	29	178	3.19612e-12	4.16382e-11	10.3805	PSMB1:PSMC4:BID:PSMA4:BAX:PSMC5:DNM1L:PSME1:PSMD5:PSMD8:MAPK1:PSMC6:PSMA3:PSMB5:PSME2:PSMA7:STK24:PSMD7:AKT2:PSMD3:KPNB1:PSMD11:YWHAE:PSMD14:PSMF1:PSMB2:TRAF2:TICAM1:PSMA1:PSME3:YWHAQ:NMT1:PSMB7:TP53:PSMB6:PSMA5:APIP:PSMD4:PSMB4:DFFA:PSMC2:PSMD6:YWHAZ:CASP7:PSMC3:YWHAB:FADD:MLKL:STAT3:AVEN:YWHAG:UBB:BCL2L1:PSMD1:PSMD2:PSMD13:BCAP31:PSMD12:OPA1:PSMB10:PPP3R1:UBA52:PSMB9:DYNLL2:PSMB3
REACTOME_TRANSCRIPTIONAL_REGULATION_BY_RUNX3	43	16	96	3.48598e-12	4.46623e-11	10.3501	PSMB1:PSMC4:RUNX3:PSMA4:CBFB:PSMC5:PSME1:PSMD5:PSMD8:PSMC6:PSMA3:SNW1:PSMB5:PSME2:PSMA7:PSMD7:TGFB1:PSMD3:PSMD11:PSMD14:PSMF1:PSMB2:PSMA1:PSME3:PSMB7:TP53:PSMB6:PSMA5:NOTCH1:PSMD4:PSMB4:PSMC2:PSMD6:PSMC3:UBB:PSMD1:PSMD2:PSMD13:PSMD12:PSMB10:UBA52:PSMB9:PSMB3
REACTOME_METABOLISM_OF_AMINO_ACIDS_AND_DERIVATIVES	110	59	372	3.72057e-12	4.72639e-11	10.3255	NDUFAB1:SLC25A13:PSMB1:PSMC4:RPL26L1:PSMA4:OAT:KARS:HSD17B10:ACAT1:RPS5:PSMC5:RPLP0:DLD:PSME1:PHGDH:PSMD5:PSMD8:MTAP:PSMC6:PSMA3:PSMB5:PSME2:PSMA7:AHCY:SMS:SLC25A15:PSMD7:GSR:OAZ1:RPS19:GCDH:AIMP2:PSMD3:PSMD11:RPS13:RARS:RPL24:PSMD14:RPS15:ODC1:DARS:SRM:AGMAT:DLST:RPL5:EEF1E1:GOT2:RPL23:PSMF1:PSMB2:IVD:PSMA1:RPL36:IDO1:PSME3:RPL27:PDHA1:MCCC2:SCLY:EPRS:PSMB7:RPL35:RPLP1:RPS24:PSMB6:RPS8:PSMA5:ALD…
REACTOME_C_TYPE_LECTIN_RECEPTORS_CLRS	55	23	140	4.16478e-12	5.24623e-11	10.2802	MAP3K14:PSMB1:PSMC4:PSMA4:CUL1:FBXW11:NFKB2:PSMC5:PSME1:PSMD5:PSMD8:PSMC6:PSMA3:PSMB5:PSME2:PSMA7:PSMD7:PPP3CB:PSMD3:PSMD11:PSMD14:IL1B:PSMF1:PSMB2:PSMA1:NFATC1:PSME3:UBE2D2:RAF1:PSMB7:PDPK1:PSMB6:PSMA5:TAB3:PSMD4:PSMB4:PSMC2:PSMD6:PSMC3:AHCYL1:UBB:PSMD1:HRAS:PSMD2:UBE2N:PSMD13:PSMD12:PSMB10:NRAS:CHUK:PPP3R1:UBA52:PSMB9:IKBKG:PSMB3
REACTOME_PROCESSING_OF_CAPPED_INTRONLESS_PRE_MRNA	20	5	28	5.39395e-12	6.68225e-11	10.1751	CPSF1:PAPOLA:SNRPD3:PABPN1:CSTF1:CSTF2:SYMPK:SNRPB:NCBP1:SNRPF:SNRPG:FIP1L1:CPSF7:LSM11:CPSF4:CPSF2:NUDT21:CLP1:LSM10:SNRPE
REACTOME_RNA_POLYMERASE_III_TRANSCRIPTION_INITIATION_FROM_TYPE_1_PROMOTER	20	5	28	5.39395e-12	6.68225e-11	10.1751	POLR3B:POLR2E:POLR2F:TBP:POLR3G:GTF3C2:GTF3C3:GTF3A:GTF3C4:POLR3F:POLR2K:GTF3C5:POLR3A:GTF3C6:POLR3K:POLR2H:POLR2L:POLR3C:POLR1D:CRCP
REACTOME_TRANSCRIPTIONAL_REGULATION_BY_TP53	107	58	363	8.99763e-12	1.10553e-10	9.95643	BID:MNAT1:RRAGD:POLR2B:TAF2:TAF11:CSNK2A2:MBD3:BAX:CNOT3:CCNK:SUPT16H:POLR2E:POLR2F:PRMT5:RABGGTA:NELFCD:CSNK2A1:RBBP8:RBBP7:POLR2C:NBN:GSR:GPI:AKT2:POLR2I:PPP2R1A:YWHAE:GTF2H1:GTF2H3:COX6A1:TBP:RAD1:PPP2CA:COX7A2L:PRDX1:PLAGL1:MAPKAP1:PMS2:CNOT1:GTF2F1:PRMT1:COX7B:SCO1:COX16:CCNB1:CDK7:LAMTOR5:YWHAQ:TACO1:CDK9:TXN:MDC1:PPP2R1B:RABGGTB:LRPPRC:PDPK1:TP53:CARM1:POLR2D:GTF2H2:POLR2K:TAF5:SSRP1:MTA2:…
REACTOME_HIV_ELONGATION_ARREST_AND_RECOVERY	23	6	36	9.68119e-12	1.17985e-10	9.92817	POLR2B:CCNK:SUPT16H:POLR2E:POLR2F:NELFCD:POLR2C:POLR2I:GTF2F1:CDK9:POLR2D:POLR2K:SSRP1:POLR2H:POLR2L:POLR2A:NELFA:TCEA1:GTF2F2:NELFB:SUPT5H:NELFE:SUPT4H1
REACTOME_TRANSCRIPTIONAL_REGULATION_BY_RUNX2	49	20	120	9.86076e-12	1.19204e-10	9.92371	PSMB1:PSMC4:PSMA4:CUL1:CBFB:BAX:PSMC5:PSME1:PSMD5:PSMD8:MAPK1:RBX1:PSMC6:PSMA3:PSMB5:PSME2:PSMA7:PSMD7:AKT2:PSMD3:PSMD11:PSMD14:STAT1:PSMF1:PSMB2:PSMA1:PSME3:CCNB1:CDK4:PSMB7:PSMB6:PSMA5:PPARGC1B:PSMD4:PSMB4:PSMC2:PSMD6:PSMC3:UBB:ESRRA:PSMD1:PSMD2:PSMD13:PSMD12:PSMB10:UBA52:RBM14:PSMB9:PSMB3
REACTOME_TP53_REGULATES_TRANSCRIPTION_OF_DNA_REPAIR_GENES	33	11	65	9.94107e-12	1.19213e-10	9.92368	MNAT1:POLR2B:CCNK:SUPT16H:POLR2E:POLR2F:NELFCD:POLR2C:POLR2I:GTF2H1:GTF2H3:PMS2:GTF2F1:CDK7:CDK9:MDC1:TP53:POLR2D:GTF2H2:POLR2K:SSRP1:ERCC3:POLR2H:ATR:POLR2L:POLR2A:NELFA:TCEA1:GTF2F2:NELFB:SUPT5H:NELFE:SUPT4H1
REACTOME_RNA_POLYMERASE_II_TRANSCRIPTION_PRE_INITIATION_AND_PROMOTER_OPENING	27	8	47	1.02161e-11	1.21539e-10	9.91529	MNAT1:POLR2B:TAF2:TAF11:POLR2E:POLR2F:POLR2C:POLR2I:GTF2H1:GTF2H3:TBP:GTF2F1:CDK7:GTF2B:GTF2A2:POLR2D:GTF2H2:POLR2K:TAF5:GTF2E1:ERCC3:POLR2H:TAF10:POLR2L:POLR2A:GTF2F2:GTF2E2
REACTOME_NUCLEAR_ENVELOPE_BREAKDOWN	29	9	53	1.15324e-11	1.36119e-10	9.86608	VRK2:NUP160:NDC1:NUP133:SEH1L:NUP50:NUP188:RAE1:LPIN2:EMD:NUP93:NUP88:NUP98:NUP107:NUP155:NUP153:NUP85:NUP214:CCNB1:NUPL2:NUP54:NUP205:SEC13:NUP35:BANF1:CTDNEP1:POM121:NUP62:POM121C
REACTOME_RRNA_MODIFICATION_IN_THE_NUCLEUS_AND_CYTOSOL	31	10	60	2.0518e-11	2.40285e-10	9.61927	TSR3:NOP14:NOP56:FBL:DDX49:GAR1:NOP2:WDR75:FCF1:RRP36:EMG1:DKC1:NOL11:NAT10:IMP4:NHP2:PDCD11:DHX37:UTP14A:DCAF13:NOL6:BMS1:RPS9:RPS7:TRMT112:IMP3:NOP10:TBL3:NOC4L:RRP7A:DDX52
REACTOME_SUMOYLATION_OF_DNA_DAMAGE_RESPONSE_AND_REPAIR_PROTEINS	36	13	77	3.2448e-11	3.7705e-10	9.4236	SCMH1:NUP160:NDC1:NUP133:SMC1A:PIAS2:SEH1L:NUP50:NUP188:RAE1:NUP93:UBE2I:PIAS4:SMC3:NUP88:NUP98:NUP107:NUP155:SUMO1:STAG1:RNF2:NUP153:NUP85:NUP214:NUPL2:MDC1:NUP54:NUP205:SEC13:NUP35:SUMO2:POM121:SMC5:RING1:NUP62:POM121C
REACTOME_SRP_DEPENDENT_COTRANSLATIONAL_PROTEIN_TARGETING_TO_MEMBRANE	46	18	113	4.44464e-11	5.12501e-10	9.29031	RPL26L1:SEC61A1:RPS5:RPLP0:SRP54:RPS19:RPS13:RPL24:SSR3:SPCS1:RPS15:RPN2:RPL5:SSR1:RPL23:SPCS3:RPL36:RPL27:RPL35:RPLP1:RPS24:SRP14:RPS8:RPL7A:FAU:RPL8:RPL29:RPL22L1:RPL27A:SRP68:RPSA:RPS9:RPS21:RPS7:RPL4:RPL15:SRP72:SSR4:RPL14:RPL37A:RPL12:RPL23A:RPL10A:UBA52:RPS28:DDOST
REACTOME_RNA_POLYMERASE_I_TRANSCRIPTION_INITIATION	26	8	47	7.80001e-11	8.92536e-10	9.04937	MNAT1:ZNRD1:MBD3:RRN3:POLR2E:POLR2F:RBBP7:TWISTNB:GTF2H1:GTF2H3:TBP:TAF1B:TTF1:CDK7:POLR1E:TAF1A:GTF2H2:POLR2K:MTA2:RBBP4:ERCC3:POLR2H:GATAD2A:POLR2L:MTA1:POLR1D
REACTOME_MAPK6_MAPK4_SIGNALING	40	15	93	8.69912e-11	9.87877e-10	9.0053	PSMB1:PSMC4:PSMA4:CDC42:XPO1:PSMC5:PSME1:PSMD5:PSMD8:PSMC6:PSMA3:PSMB5:PSME2:PSMA7:PSMD7:PSMD3:PSMD11:PSMD14:NCOA3:PSMF1:PSMB2:PSMA1:PSME3:PSMB7:PSMB6:PSMA5:PSMD4:PSMB4:PSMC2:PSMD6:PSMC3:UBB:PSMD1:PSMD2:PSMD13:PSMD12:PSMB10:UBA52:PSMB9:PSMB3
REACTOME_TRNA_AMINOACYLATION	24	7	42	1.36432e-10	1.5334e-09	8.81434	LARS2:KARS:AARS:EARS2:SARS2:AIMP2:RARS:DARS:FARSB:WARS2:AARS2:EEF1E1:CARS2:EPRS:VARS2:NARS2:YARS2:WARS:FARS2:PARS2:HARS:FARSA:PPA1:VARS
REACTOME_NEDDYLATION	75	38	234	1.37075e-10	1.5334e-09	8.81434	PSMB1:PSMC4:PSMA4:DCUN1D1:ERCC8:CUL1:BTBD1:FBXW11:KEAP1:PSMC5:PSME1:PSMD5:PSMD8:RBX1:PSMC6:PSMA3:PSMB5:PSME2:PSMA7:CCDC22:RBBP7:PSMD7:CUL2:PSMD3:PSMD11:CAND1:RNF7:CISH:PSMD14:DCAF17:FBXO6:RBBP5:PSMF1:PSMB2:PSMA1:DDA1:PSME3:UBE2D2:FBXW9:DCAF7:PSMB7:DCUN1D5:COPS4:COPS3:FEM1A:PSMB6:PSMA5:COPS7B:ASB6:PSMD4:PSMB4:NAE1:PSMC2:FBXO41:PSMD6:DCAF13:PSMC3:COPS2:FBXO22:DDB1:COPS6:GPS1:UBB:COMMD1:PSMD1:PSMD2:…
REACTOME_G2_M_CHECKPOINTS	59	27	168	1.82842e-10	2.03022e-09	8.69246	DBF4:PSMB1:PSMC4:PSMA4:TP53BP1:PSMC5:PSME1:PSMD5:PSMD8:PSMC6:PSMA3:PSMB5:PSME2:PSMA7:RBBP8:PSMD7:NBN:PIAS4:PSMD3:PSMD11:YWHAE:RAD1:PSMD14:ORC2:SUMO1:PSMF1:PSMB2:PSMA1:PSME3:CCNB1:YWHAQ:PSMB7:MDC1:TP53:PSMB6:PSMA5:PSMD4:PSMB4:PSMC2:PSMD6:YWHAZ:PSMC3:YWHAB:UBE2V2:YWHAG:UBB:KAT5:PSMD1:ATR:PSMD2:TOP3A:UBE2N:PSMD13:H2AFX:PSMD12:PSMB10:UBA52:PSMB9:PSMB3
REACTOME_MITOTIC_G1_G1_S_PHASES	54	24	149	2.52129e-10	2.74428e-09	8.56157	DBF4:PSMB1:PSMC4:MNAT1:PSMA4:CUL1:PSMC5:PSME1:PSMD5:JAK2:PSMD8:PSMC6:PSMA3:PSMB5:PSME2:PSMA7:PSMD7:AKT2:PPP2R1A:PSMD3:PSMD11:FBXO5:PPP2CA:PSMD14:ORC2:CCND2:PSMF1:PSMB2:PSMA1:PSME3:CCNB1:CDK7:CDK4:PSMB7:PPP2R1B:PSMB6:PSMA5:POLE3:PSMD4:PSMB4:PSMC2:RBBP4:PSMD6:PSMC3:UBB:PSMD1:PSMD2:PSMD13:PSMD12:PSMB10:E2F4:UBA52:PSMB9:PSMB3
REACTOME_BETA_CATENIN_INDEPENDENT_WNT_SIGNALING	53	23	145	2.50018e-10	2.74428e-09	8.56157	DVL2:PSMB1:PSMC4:PSMA4:RHOA:GNB1:PSMC5:PSME1:PSMD5:PSMD8:PSMC6:PSMA3:PSMB5:PSME2:PSMA7:PSMD7:FZD3:PPP3CB:PSMD3:PSMD11:PSMD14:CLTA:PSMF1:PSMB2:PSMA1:NFATC1:PSME3:PSMB7:CLTC:PSMB6:PSMA5:PSMD4:PSMB4:PSMC2:FZD5:PSMD6:RYK:FZD6:PSMC3:UBB:PSMD1:GNG5:PSMD2:CLTB:SCRIB:PSMD13:GNG2:PSMD12:PSMB10:PPP3R1:UBA52:PSMB9:PSMB3
REACTOME_TRANSCRIPTION_COUPLED_NUCLEOTIDE_EXCISION_REPAIR_TC_NER	35	13	78	2.52642e-10	2.74428e-09	8.56157	MNAT1:AQR:POLR2B:ERCC8:XAB2:POLR2E:POLR2F:RBX1:POLR2C:POLR2I:POLD2:PRPF19:GTF2H1:GTF2H3:CDK7:COPS4:COPS3:POLR2D:COPS7B:GTF2H2:POLR2K:POLE3:ERCC3:POLR2H:COPS2:DDB1:COPS6:GPS1:UBB:ERCC4:POLR2L:POLR2A:TCEA1:UBA52:ISY1
REACTOME_RNA_POLYMERASE_III_TRANSCRIPTION	23	7	41	5.20794e-10	5.61634e-09	8.25055	POLR3B:POLR2E:POLR2F:SNAPC2:TBP:POLR3G:GTF3C2:GTF3C3:GTF3A:GTF3C4:POLR3F:SSB:POLR2K:GTF3C5:POLR3A:GTF3C6:POLR3K:POLR2H:SNAPC5:POLR2L:POLR3C:POLR1D:CRCP
REACTOME_CYTOSOLIC_SENSORS_OF_PATHOGEN_ASSOCIATED_DNA	30	10	63	6.06804e-10	6.49714e-09	8.18728	POLR3B:NFKB2:XRCC5:POLR2E:POLR2F:NFKBIB:POLR3G:TICAM1:TRIM21:POLR3F:DHX9:POLR2K:POLR3A:POLR3K:IFI16:POLR2H:STAT6:NKIRAS2:UBB:MYD88:POLR2L:DDX41:POLR3C:POLR1D:XRCC6:CHUK:UBA52:CRCP:PRKDC:IKBKG
REACTOME_HEDGEHOG_OFF_STATE	44	18	113	6.35143e-10	6.75234e-09	8.17055	PSMB1:PSMC4:PSMA4:CUL1:PSMC5:PSME1:PSMD5:PSMD8:RBX1:PSMC6:PSMA3:PSMB5:PSME2:PSMA7:PSMD7:PSMD3:PSMD11:PRKAR1A:IFT57:PSMD14:WDR35:PSMF1:PSMB2:PSMA1:PSME3:PSMB7:PSMB6:PSMA5:PSMD4:PSMB4:PSMC2:PSMD6:PSMC3:TUBA1C:UBB:PSMD1:PSMD2:PSMD13:TUBB4B:PSMD12:PSMB10:UBA52:PSMB9:PSMB3
REACTOME_SUMOYLATION_OF_CHROMATIN_ORGANIZATION_PROTEINS	32	12	71	1.12342e-09	1.18592e-08	7.92595	SCMH1:NUP160:NDC1:NUP133:PIAS2:SEH1L:NUP50:NUP188:L3MBTL2:RAE1:NUP93:UBE2I:NUP88:NUP98:NUP107:NUP155:SUMO1:RNF2:NUP153:NUP85:NUP214:NUPL2:NUP54:NUP205:SEC13:NUP35:SUZ12:SUMO2:POM121:RING1:NUP62:POM121C
REACTOME_RNA_POLYMERASE_I_TRANSCRIPTION_TERMINATION	19	5	31	1.293e-09	1.35539e-08	7.86794	MNAT1:ZNRD1:POLR2E:POLR2F:TWISTNB:GTF2H1:GTF2H3:TBP:TAF1B:TTF1:CDK7:POLR1E:TAF1A:GTF2H2:POLR2K:ERCC3:POLR2H:POLR2L:POLR1D
REACTOME_PROTEIN_LOCALIZATION	56	26	164	1.69835e-09	1.76793e-08	7.75253	SLC25A13:AGPS:PEX3:CS:BCS1L:TIMM21:TIMM13:HSCB:TOMM22:SAMM50:SLC25A17:ACO2:TIMM9:EMD:CMC2:SGTA:TIMM44:TIMM50:PMPCB:CHCHD2:PEX12:HSPA9:MPV17:ABCD3:IDE:SERP1:MTX2:TOMM40:UBE2D2:TIMM17A:TIMM10:PEX14:HSPD1:TIMM8B:PEX10:UBE2J2:CHCHD4:GRPEL2:FXN:PMPCA:COA6:UBB:COQ2:MTX1:TIMM22:ACOT4:CYC1:COA4:ASNA1:BAG6:VDAC1:NUDT19:FIS1:UBA52:DECR2:TIMM23
REACTOME_DISEASES_OF_SIGNAL_TRANSDUCTION	105	62	386	2.3495e-09	2.42889e-08	7.61459	AGK:PSMB1:PSMC4:PSMA4:POLR2B:CUL1:ACTB:ARAF:HSP90AA1:PSMC5:FKBP1A:PEBP1:PSME1:PSMD5:JAK2:PSMD8:POLR2E:MAPK1:POLR2F:RBX1:PSMC6:PSMA3:SNW1:PSMB5:PSME2:PSMA7:POLR2C:PSMD7:AKT2:POLR2I:TGFB1:PPP2R1A:GSK3A:PSMD3:PSMD11:CPSF6:CCNC:HBEGF:PPP2CA:FXR1:PSMD14:STAT1:RAP1A:MAPKAP1:GTF2F1:PSMF1:PSMB2:PSMA1:PSME3:RAF1:CDK8:PSMB7:NCBP1:PPP2R1B:PDPK1:PSMB6:PSMA5:POLR2D:POLR2K:NOTCH1:PPP2R5E:PIK3AP1:BAG4:PSMD4:PSM…
REACTOME_NUCLEOBASE_BIOSYNTHESIS	12	3	15	2.91659e-09	2.9945e-08	7.52368	ADSS:CAD:IMPDH1:UMPS:PAICS:PPAT:ATIC:GART:GMPS:IMPDH2:PFAS:ADSL
REACTOME_TCR_SIGNALING	45	20	122	3.34572e-09	3.41172e-08	7.46703	PSMB1:PSMC4:PSMA4:CUL1:FBXW11:PSMC5:PSME1:PSMD5:PSMD8:PSMC6:PSMA3:PSMB5:PSME2:PSMA7:PSMD7:RIPK2:PSMD3:PSMD11:PSMD14:PSMF1:PSMB2:PSMA1:PSME3:UBE2D2:PSMB7:PDPK1:PSMB6:PSMA5:PSMD4:PSMB4:PSMC2:PSMD6:PSMC3:UBB:PSMD1:PSMD2:UBE2N:PSMD13:PSMD12:PSMB10:CHUK:UBA52:PSMB9:IKBKG:PSMB3
REACTOME_RESPIRATORY_ELECTRON_TRANSPORT	39	16	99	3.43184e-09	3.4759e-08	7.45893	NDUFAB1:NDUFB2:NDUFB7:NDUFAF5:COX6A1:COX7A2L:SDHB:NDUFA1:TRAP1:UQCR11:ECSIT:COX7B:SCO1:COX16:TACO1:NDUFAF1:LRPPRC:NDUFA9:ETFA:UQCRC2:NDUFS6:NDUFB9:NDUFC2:NDUFV3:UQCRQ:COX6C:NDUFB6:UQCRFS1:NDUFA3:TMEM126B:ETFDH:UQCRH:ACAD9:NDUFAF3:COX5A:CYC1:NDUFA6:SDHD:NDUFS3
REACTOME_INTERLEUKIN_12_SIGNALING	24	8	47	3.52925e-09	3.55057e-08	7.4497	CDC42:IL12RB2:RPLP0:JAK2:IL12RB1:MTAP:PSME2:HSPA9:CAPZA1:TCP1:HNRNPA2B1:LCP1:STAT4:SOD1:ARF1:MSN:GSTO1:HNRNPF:CFL1:PITPNA:TALDO1:P4HB:PPIA:MIF
REACTOME_ACTIVATION_OF_THE_MRNA_UPON_BINDING_OF_THE_CAP_BINDING_COMPLEX_AND_EIFS_AND_SUBSEQUENT_BINDING_TO_43S	28	10	60	3.69323e-09	3.69076e-08	7.43288	EIF4B:RPS5:EIF3I:EIF3D:EIF3E:RPS19:EIF3B:EIF4H:RPS13:EIF4G1:RPS15:EIF2S2:EIF2S3:EIF3G:EIF2S1:RPS24:RPS8:EIF3H:EIF3M:FAU:RPSA:RPS9:RPS21:RPS7:EIF3F:EIF3K:EIF4EBP1:RPS28
REACTOME_FGFR2_ALTERNATIVE_SPLICING	17	5	27	4.03939e-09	4.00996e-08	7.39686	PTBP1:POLR2B:HNRNPM:POLR2E:POLR2F:RBFOX2:POLR2C:POLR2I:GTF2F1:NCBP1:POLR2D:POLR2K:POLR2H:HNRNPF:POLR2L:POLR2A:GTF2F2
REACTOME_INTERLEUKIN_12_FAMILY_SIGNALING	27	10	57	4.32129e-09	4.26159e-08	7.37043	CDC42:IL12RB2:RPLP0:JAK2:IL12RB1:MTAP:PSME2:HSPA9:STAT1:CAPZA1:TCP1:HNRNPA2B1:CANX:LCP1:STAT4:SOD1:ARF1:MSN:GSTO1:STAT3:HNRNPF:CFL1:PITPNA:TALDO1:P4HB:PPIA:MIF
REACTOME_DUAL_INCISION_IN_TC_NER	29	11	65	7.86456e-09	7.70521e-08	7.11322	MNAT1:AQR:POLR2B:ERCC8:XAB2:POLR2E:POLR2F:RBX1:POLR2C:POLR2I:POLD2:PRPF19:GTF2H1:GTF2H3:CDK7:POLR2D:GTF2H2:POLR2K:POLE3:ERCC3:POLR2H:DDB1:UBB:ERCC4:POLR2L:POLR2A:TCEA1:UBA52:ISY1
REACTOME_SIGNALING_BY_THE_B_CELL_RECEPTOR_BCR	55	27	166	8.11378e-09	7.89776e-08	7.1025	PSMB1:PSMC4:PSMA4:CUL1:FBXW11:PSMC5:FKBP1A:PSME1:PSMD5:PSMD8:PSMC6:PSMA3:PSMB5:PSME2:PSMA7:PSMD7:NFKBIB:PPP3CB:PSMD3:PSMD11:PTPN6:PSMD14:PSMF1:PSMB2:PSMA1:NFATC1:PSME3:PSMB7:PSMB6:PSMA5:NFKBIE:PIK3AP1:PSMD4:PSMB4:PSMC2:PSMD6:PSMC3:AHCYL1:UBB:PSMD1:HRAS:PSMD2:GRB2:PSMD13:PPIA:PSMD12:PSMB10:NRAS:CHUK:PPP3R1:UBA52:PSMB9:IKBKG:PSMB3:ORAI1
REACTOME_FOLDING_OF_ACTIN_BY_CCT_TRIC	9	2	10	9.7394e-09	9.35856e-08	7.02879	ACTB:CCT4:TCP1:CCT7:CCT6A:CCT5:CCT8:CCT3:CCT2
REACTOME_RNA_POLYMERASE_III_CHAIN_ELONGATION	13	3	18	9.72856e-09	9.35856e-08	7.02879	POLR3B:POLR2E:POLR2F:POLR3G:POLR3F:POLR2K:POLR3A:POLR3K:POLR2H:POLR2L:POLR3C:POLR1D:CRCP
REACTOME_SELENOAMINO_ACID_METABOLISM	43	19	118	1.08776e-08	1.03857e-07	6.98356	RPL26L1:KARS:RPS5:RPLP0:AHCY:GSR:RPS19:AIMP2:RPS13:RARS:RPL24:RPS15:DARS:RPL5:EEF1E1:RPL23:RPL36:RPL27:SCLY:EPRS:RPL35:RPLP1:RPS24:RPS8:RPL7A:FAU:RPL8:RPL29:RPL22L1:RPL27A:RPSA:RPS9:RPS21:RPS7:RPL4:RPL15:RPL14:RPL37A:RPL12:RPL23A:RPL10A:UBA52:RPS28
REACTOME_PURINE_RIBONUCLEOSIDE_MONOPHOSPHATE_BIOSYNTHESIS	10	2	12	1.57628e-08	1.49547e-07	6.82522	ADSS:IMPDH1:PAICS:PPAT:ATIC:GART:GMPS:IMPDH2:PFAS:ADSL
REACTOME_RNA_POLYMERASE_II_TRANSCRIBES_SNRNA_GENES	33	13	81	1.62533e-08	1.53231e-07	6.81465	POLR2B:TAF11:SRRT:CCNK:POLR2E:POLR2F:RPRD1B:POLR2C:INTS9:SNAPC2:POLR2I:TBP:GTF2F1:CDK7:CDK9:NCBP1:GTF2B:INTS12:GTF2A2:POLR2D:POLR2K:TAF5:GTF2E1:SSU72:POLR2H:SNAPC5:POLR2L:POLR2A:INTS5:GTF2F2:SUPT5H:GTF2E2:SUPT4H1
REACTOME_NONSENSE_MEDIATED_DECAY_NMD_INDEPENDENT_OF_THE_EXON_JUNCTION_COMPLEX_EJC	37	16	96	1.64893e-08	1.54484e-07	6.81112	UPF1:RPL26L1:RPS5:RPLP0:RPS19:RPS13:RPL24:EIF4G1:RPS15:RPL5:RPL23:RPL36:RPL27:NCBP1:RPL35:RPLP1:RPS24:RPS8:RPL7A:FAU:RPL8:RPL29:RPL22L1:RPL27A:RPSA:RPS9:RPS21:RPS7:RPL4:RPL15:RPL14:RPL37A:RPL12:RPL23A:RPL10A:UBA52:RPS28
REACTOME_POST_TRANSLATIONAL_PROTEIN_MODIFICATION	299	227	1429	1.76492e-08	1.64323e-07	6.7843	DPM1:PAF1:PRSS21:PSMB1:SCMH1:PSMC4:NUP160:ALG1:UBA6:PSMA4:DCUN1D1:ERCC8:TRAPPC3:CUL1:NDC1:BTBD1:TP53BP1:RHOA:NUP133:SMC1A:FBXW11:LMAN1:ACTB:RAB7A:NFKB2:UBE2A:PIAS2:UBE2K:SENP1:KEAP1:APLP2:RAB10:SEH1L:POMGNT1:PSMC5:MUL1:PSME1:SCFD1:HNRNPC:NUP50:DHPS:ARCN1:PSMD5:NUP188:PSMD8:JOSD1:TTLL12:RBX1:L3MBTL2:RANGAP1:PSMC6:GNPNAT1:PSMA3:PSMB5:PSME2:RABGGTA:RAE1:PSMA7:PIGU:STS:CCDC22:RBBP7:NUP93:PSMD7:USP10:…
REACTOME_GENE_AND_PROTEIN_EXPRESSION_BY_JAK_STAT_SIGNALING_AFTER_INTERLEUKIN_12_STIMULATION	20	7	38	2.6082e-08	2.41339e-07	6.61737	CDC42:RPLP0:MTAP:PSME2:HSPA9:CAPZA1:TCP1:HNRNPA2B1:LCP1:STAT4:SOD1:ARF1:MSN:GSTO1:HNRNPF:CFL1:PITPNA:TALDO1:PPIA:MIF
REACTOME_INTRACELLULAR_SIGNALING_BY_SECOND_MESSENGERS	84	48	302	2.78532e-08	2.56147e-07	6.59151	KDM1A:PSMB1:SCMH1:PSMC4:RRAGD:PHLPP2:PSMA4:CSNK2A2:MBD3:PSMC5:PSME1:PSMD5:PSMD8:MAPK1:PSMC6:PSMA3:PSMB5:PSME2:PSMA7:TRIB3:CSNK2A1:RBBP7:PSMD7:AKT2:PPP2R1A:GSK3A:EZH2:PSMD3:PSMD11:PRKAR1A:ATN1:HBEGF:PPP2CA:PSMD14:MAPKAP1:RNF2:PSMF1:PSMB2:PSMA1:PSME3:LAMTOR5:PSMB7:PPP2R1B:PDPK1:TP53:PSMB6:PSMA5:PIP5K1A:MTA2:PPP2R5E:PIK3AP1:RRAGA:PSMD4:PSMB4:PSMC2:RBBP4:PSMD6:PSMC3:GATAD2A:MLST8:AHCYL1:UBB:MYD88:PSM…
REACTOME_DNA_REPAIR	90	53	331	3.08704e-08	2.82163e-07	6.5495	REV3L:BAZ1B:PPP5C:MNAT1:AQR:TDP1:POLR2B:ERCC8:RNF4:TP53BP1:TIPIN:ACTB:XAB2:XRCC5:PALB2:POLR2E:POLR2F:ASCC2:RBX1:APEX1:RBBP8:POLR2C:USP10:UBE2I:NBN:PIAS4:POLR2I:POLD2:PRPF19:GTF2H1:GTF2H3:ASCC3:RAD1:SUMO1:MSH6:ADPRHL2:RAD23B:TRIM25:PMS2:USP45:TERF2:CDK7:ACTL6A:MDC1:ASCC1:COPS4:COPS3:TP53:POLR2D:COPS7B:GTF2H2:POLR2K:POLE3:PPP4C:SMARCA5:INO80C:UBE2L6:PAXIP1:EYA3:ERCC3:POLR2H:BAP1:VCP:ALKBH3:COPS2:TE…
REACTOME_PROCESSING_OF_INTRONLESS_PRE_MRNAS	13	4	19	3.15555e-08	2.8495e-07	6.54523	CPSF1:PAPOLA:PABPN1:CSTF1:CSTF2:SYMPK:NCBP1:FIP1L1:CPSF7:CPSF4:CPSF2:NUDT21:CLP1
REACTOME_SIGNALING_BY_FGFR2_IIIA_TM	13	4	19	3.15555e-08	2.8495e-07	6.54523	POLR2B:POLR2E:POLR2F:POLR2C:POLR2I:GTF2F1:NCBP1:POLR2D:POLR2K:POLR2H:POLR2L:POLR2A:GTF2F2
REACTOME_SUMOYLATION	58	30	187	5.19309e-08	4.66135e-07	6.33149	SCMH1:NUP160:NDC1:TP53BP1:NUP133:SMC1A:NFKB2:PIAS2:SENP1:SEH1L:HNRNPC:NUP50:NUP188:L3MBTL2:RANGAP1:RAE1:NUP93:UBE2I:PIAS4:SMC3:NUP88:NUP98:NUP107:NUP155:SUMO1:PARK7:STAG1:DNMT3A:RNF2:NUP153:NUP85:UBA2:NUP214:TRIM28:NR1H2:NUPL2:MDC1:NUP54:TP53:NUP205:SEC13:SAFB:NUP35:HNRNPK:HIC1:SUZ12:NPM1:MTA1:SUMO2:POM121:NCOR2:SMC5:DAXX:RING1:TRIM27:NUP62:IKBKG:POM121C
REACTOME_DEADENYLATION_DEPENDENT_MRNA_DECAY	25	9	56	6.72069e-08	5.99661e-07	6.22209	EDC4:EIF4B:EXOSC5:DIS3:CNOT3:LSM5:EXOSC3:EIF4G1:EXOSC8:EXOSC9:CNOT1:LSM4:EXOSC2:WDR61:EIF4A3:CNOT11:PATL1:LSM3:EXOSC1:LSM1:EXOSC4:EDC3:CNOT10:CNOT7:SKIV2L
REACTOME_MICRORNA_MIRNA_BIOGENESIS	15	4	25	7.19959e-08	6.38591e-07	6.19478	POLR2B:POLR2E:POLR2F:DICER1:POLR2C:POLR2I:XPO5:DGCR8:RAN:TARBP2:POLR2D:POLR2K:POLR2H:POLR2L:POLR2A
REACTOME_SIGNALING_BY_HEDGEHOG	49	24	150	7.85337e-08	6.92482e-07	6.15959	PSMB1:PSMC4:PSMA4:CUL1:CDON:PSMC5:PSME1:PSMD5:PSMD8:RBX1:PSMC6:PSMA3:PSMB5:PSME2:PSMA7:PSMD7:PSMD3:PSMD11:PRKAR1A:IFT57:PSMD14:WDR35:PSMF1:PSMB2:PSMA1:PSME3:PSMB7:ULK3:PSMB6:PSMA5:SPOPL:PSMD4:PSMB4:PSMC2:PSMD6:VCP:PSMC3:TUBA1C:UBB:PSMD1:PSMD2:P4HB:PSMD13:TUBB4B:PSMD12:PSMB10:UBA52:PSMB9:PSMB3
REACTOME_PREFOLDIN_MEDIATED_TRANSFER_OF_SUBSTRATE_TO_CCT_TRIC	16	5	28	8.597e-08	7.49239e-07	6.12538	ACTB:PFDN4:PFDN1:CCT4:TCP1:CCT7:PFDN2:CCT6A:CCT5:VBP1:CCT8:CCT3:CCT2:TUBA1C:TUBB4B:PFDN6
REACTOME_RNA_POLYMERASE_III_TRANSCRIPTION_INITIATION_FROM_TYPE_3_PROMOTER	16	5	28	8.597e-08	7.49239e-07	6.12538	POLR3B:POLR2E:POLR2F:SNAPC2:TBP:POLR3G:POLR3F:POLR2K:POLR3A:POLR3K:POLR2H:SNAPC5:POLR2L:POLR3C:POLR1D:CRCP
REACTOME_RNA_POLYMERASE_III_TRANSCRIPTION_TERMINATION	14	4	23	1.29522e-07	1.12227e-06	5.9499	POLR3B:POLR2E:POLR2F:POLR3G:POLR3F:SSB:POLR2K:POLR3A:POLR3K:POLR2H:POLR2L:POLR3C:POLR1D:CRCP
REACTOME_FCERI_MEDIATED_NF_KB_ACTIVATION	45	22	136	1.58508e-07	1.36553e-06	5.8647	PSMB1:PSMC4:PSMA4:CUL1:FBXW11:PSMC5:PSME1:PSMD5:PSMD8:PSMC6:PSMA3:PSMB5:PSME2:PSMA7:PSMD7:PSMD3:PSMD11:PSMD14:PSMF1:PSMB2:PSMA1:PSME3:UBE2D2:PSMB7:PDPK1:PSMB6:PSMA5:TAB3:PSMD4:PSMB4:PSMC2:PSMD6:PSMC3:UBB:PSMD1:PSMD2:UBE2N:PSMD13:PSMD12:PSMB10:CHUK:UBA52:PSMB9:IKBKG:PSMB3
REACTOME_RUNX1_REGULATES_TRANSCRIPTION_OF_GENES_INVOLVED_IN_DIFFERENTIATION_OF_HSCS	43	21	128	1.73666e-07	1.48757e-06	5.82752	PSMB1:PSMC4:MNAT1:PSMA4:CBFB:TCF3:PSMC5:PSME1:PSMD5:PSMD8:PSMC6:PSMA3:PSMB5:PSME2:PSMA7:PSMD7:PSMD3:PSMD11:PSMD14:PSMF1:PSMB2:PSMA1:PSME3:H3F3B:CDK7:PSMB7:PSMB6:PSMA5:PSMD4:PSMB4:PSMC2:PSMD6:PSMC3:UBB:PSMD1:PSMD2:PSMD13:H2AFX:PSMD12:PSMB10:UBA52:PSMB9:PSMB3
REACTOME_GLOBAL_GENOME_NUCLEOTIDE_EXCISION_REPAIR_GG_NER	32	14	84	1.77004e-07	1.50755e-06	5.82173	MNAT1:ACTB:RBX1:UBE2I:POLD2:GTF2H1:GTF2H3:SUMO1:RAD23B:USP45:CDK7:ACTL6A:COPS4:COPS3:COPS7B:GTF2H2:POLE3:INO80C:ERCC3:COPS2:DDB1:COPS6:UBE2V2:GPS1:UBB:ERCC4:RUVBL1:UBE2N:RAD23A:MCRS1:SUMO2:UBA52
REACTOME_THE_CITRIC_ACID_TCA_CYCLE_AND_RESPIRATORY_ELECTRON_TRANSPORT	53	28	173	2.80419e-07	2.37485e-06	5.62436	NDUFAB1:CS:ME2:NDUFB2:DLD:NDUFB7:ACO2:NDUFAF5:IDH3B:LDHB:COX6A1:COX7A2L:SDHB:DLST:NDUFA1:TRAP1:UQCR11:ECSIT:COX7B:PDHA1:SCO1:COX16:LDHA:SUCLA2:TACO1:NDUFAF1:LRPPRC:NDUFA9:ETFA:UQCRC2:NDUFS6:NDUFB9:DLAT:NDUFC2:NDUFV3:UQCRQ:COX6C:NDUFB6:IDH3A:UQCRFS1:NDUFA3:TMEM126B:ETFDH:BSG:UQCRH:ACAD9:NDUFAF3:COX5A:CYC1:NDUFA6:SDHD:VDAC1:NDUFS3
REACTOME_RECYCLING_OF_EIF2:GDP	7	2	8	3.9134e-07	3.29561e-06	5.48206	EIF2B3:EIF2B1:EIF2B2:EIF2S2:EIF2S3:EIF2S1:EIF2B5
REACTOME_TRISTETRAPROLIN_TTP_ZFP36_BINDS_AND_DESTABILIZES_MRNA	11	3	17	6.83582e-07	5.72452e-06	5.24226	EXOSC5:TNPO1:DIS3:EXOSC3:EXOSC8:EXOSC9:EXOSC2:MAPKAPK2:YWHAB:EXOSC1:EXOSC4
REACTOME_TRANSCRIPTIONAL_REGULATION_BY_SMALL_RNAS	36	17	105	8.1698e-07	6.80363e-06	5.16726	NUP160:POLR2B:NDC1:NUP133:SEH1L:NUP50:NUP188:POLR2E:POLR2F:RAE1:NUP93:POLR2C:POLR2I:NUP88:NUP98:NUP107:NUP155:NUP153:NUP85:NUP214:RAN:H3F3B:NUPL2:NUP54:POLR2D:POLR2K:NUP205:SEC13:NUP35:POLR2H:POLR2L:POLR2A:H2AFX:POM121:NUP62:POM121C
REACTOME_PROTEIN_FOLDING	35	17	102	1.09751e-06	9.08932e-06	5.04147	GNAI3:CSNK2A2:ACTB:GNB1:PFDN4:CSNK2A1:NOP56:PFDN1:CCT4:FBXO6:TCP1:ARFGEF2:FBXW9:CCT7:DCAF7:TP53:TBCD:PFDN2:CCT6A:CCT5:VBP1:CCT8:CCT3:CCT2:TUBA1C:STAT3:TBCA:GNG5:SPHK1:AP3M1:GNG2:TUBB4B:PFDN6:SKIV2L:CSNK2B
REACTOME_FC_EPSILON_RECEPTOR_FCERI_SIGNALING	54	30	186	1.49891e-06	1.23454e-05	4.90849	PSMB1:PSMC4:PSMA4:CUL1:FBXW11:PSMC5:PSME1:PSMD5:PSMD8:MAPK1:PSMC6:PSMA3:PSMB5:PSME2:PSMA7:PSMD7:PPP3CB:PSMD3:PSMD11:PSMD14:PSMF1:PSMB2:PSMA1:NFATC1:PSME3:UBE2D2:VAV3:PSMB7:PDPK1:PSMB6:PSMA5:TAB3:PSMD4:PSMB4:PSMC2:PSMD6:PSMC3:AHCYL1:UBB:PSMD1:HRAS:PSMD2:GRB2:UBE2N:PSMD13:PSMD12:PSMB10:NRAS:CHUK:PPP3R1:UBA52:PSMB9:IKBKG:PSMB3
REACTOME_ASSOCIATION_OF_TRIC_CCT_WITH_TARGET_PROTEINS_DURING_BIOSYNTHESIS	18	7	39	1.5904e-06	1.30273e-05	4.88514	NOP56:CCT4:FBXO6:TCP1:ARFGEF2:FBXW9:CCT7:DCAF7:TP53:CCT6A:CCT5:CCT8:CCT3:CCT2:STAT3:SPHK1:AP3M1:SKIV2L
REACTOME_COOPERATION_OF_PREFOLDIN_AND_TRIC_CCT_IN_ACTIN_AND_TUBULIN_FOLDING	16	6	33	2.10484e-06	1.71476e-05	4.7658	ACTB:PFDN4:PFDN1:CCT4:TCP1:CCT7:PFDN2:CCT6A:CCT5:VBP1:CCT8:CCT3:CCT2:TUBA1C:TUBB4B:PFDN6
REACTOME_FORMATION_OF_INCISION_COMPLEX_IN_GG_NER	19	7	43	2.13155e-06	1.71784e-05	4.76502	MNAT1:RBX1:UBE2I:GTF2H1:GTF2H3:SUMO1:RAD23B:USP45:CDK7:GTF2H2:ERCC3:DDB1:UBE2V2:UBB:ERCC4:UBE2N:RAD23A:SUMO2:UBA52
REACTOME_TRNA_MODIFICATION_IN_THE_NUCLEUS_AND_CYTOSOL	19	7	43	2.13155e-06	1.71784e-05	4.76502	FTSJ1:OSGEP:PUS3:THG1L:THADA:TRMT5:EPRS:CTU1:TPRKB:WDR4:TYW3:URM1:DUS2:LCMT2:TRMT112:CTU2:PUS1:QTRT1:ADAT3
REACTOME_MITOCHONDRIAL_TRNA_AMINOACYLATION	12	4	21	2.19863e-06	1.76243e-05	4.75389	LARS2:KARS:EARS2:SARS2:WARS2:AARS2:CARS2:VARS2:NARS2:YARS2:FARS2:PARS2
REACTOME_CYTOSOLIC_TRNA_AMINOACYLATION	13	4	24	2.41644e-06	1.92672e-05	4.71518	KARS:AARS:AIMP2:RARS:DARS:FARSB:EEF1E1:EPRS:WARS:HARS:FARSA:PPA1:VARS
REACTOME_RESPIRATORY_ELECTRON_TRANSPORT_ATP_SYNTHESIS_BY_CHEMIOSMOTIC_COUPLING_AND_HEAT_PRODUCTION_BY_UNCOUPLING_PROTEINS	39	20	122	2.46319e-06	1.95361e-05	4.70916	NDUFAB1:NDUFB2:NDUFB7:NDUFAF5:COX6A1:COX7A2L:SDHB:NDUFA1:TRAP1:UQCR11:ECSIT:COX7B:SCO1:COX16:TACO1:NDUFAF1:LRPPRC:NDUFA9:ETFA:UQCRC2:NDUFS6:NDUFB9:NDUFC2:NDUFV3:UQCRQ:COX6C:NDUFB6:UQCRFS1:NDUFA3:TMEM126B:ETFDH:UQCRH:ACAD9:NDUFAF3:COX5A:CYC1:NDUFA6:SDHD:NDUFS3
REACTOME_SLBP_DEPENDENT_PROCESSING_OF_REPLICATION_DEPENDENT_HISTONE_PRE_MRNAS	8	2	11	2.50125e-06	1.97336e-05	4.70479	SNRPD3:SNRPB:NCBP1:SNRPF:SNRPG:LSM11:LSM10:SNRPE
REACTOME_TCF_DEPENDENT_SIGNALING_IN_RESPONSE_TO_WNT	63	37	232	3.04523e-06	2.38994e-05	4.62161	DVL2:PSMB1:PSMC4:RUNX3:PSMA4:CSNK2A2:XPO1:PSMC5:PSME1:PSMD5:PSMD8:RBX1:PSMC6:PSMA3:PSMB5:PSME2:PSMA7:CSNK2A1:PSMD7:AKT2:PPP2R1A:PSMD3:PSMD11:PPP2CA:PSMD14:RBBP5:PSMF1:PSMB2:PSMA1:PSME3:H3F3B:PSMB7:PPP2R1B:PSMB6:PSMA5:PPP2R5E:PSMD4:PSMB4:PSMC2:LRP5:FZD5:PSMD6:RYK:TERT:YWHAZ:FZD6:PSMC3:LEO1:UBB:KAT5:PSMD1:PSMD2:RUVBL1:AMER1:PSMD13:H2AFX:TRRAP:PSMD12:CSNK2B:PSMB10:UBA52:PSMB9:PSMB3
REACTOME_MRNA_DECAY_BY_3_TO_5_EXORIBONUCLEASE	10	3	16	3.08019e-06	2.3972e-05	4.6203	EXOSC5:DIS3:EXOSC3:EXOSC8:EXOSC9:EXOSC2:WDR61:EXOSC1:EXOSC4:SKIV2L
REACTOME_GENE_SILENCING_BY_RNA	42	22	136	3.08645e-06	2.3972e-05	4.6203	NUP160:POLR2B:NDC1:NUP133:HSP90AA1:SEH1L:NUP50:NUP188:POLR2E:POLR2F:DICER1:RAE1:NUP93:POLR2C:POLR2I:NUP88:NUP98:NUP107:NUP155:XPO5:NUP153:NUP85:NUP214:DGCR8:RAN:H3F3B:NUPL2:NUP54:TARBP2:POLR2D:POLR2K:NUP205:SEC13:NUP35:POLR2H:POLR2L:POLR2A:H2AFX:POM121:TSN:NUP62:POM121C
REACTOME_TRANSCRIPTIONAL_REGULATION_BY_RUNX1	64	38	237	3.16789e-06	2.44777e-05	4.61123	PSMB1:SCMH1:PSMC4:MNAT1:PSMA4:SMARCD1:CBFB:CSNK2A2:TCF3:SMARCE1:PSMC5:PSME1:PSMD5:PSMD8:SMARCB1:PSMC6:PSMA3:PSMB5:PSME2:PSMA7:CSNK2A1:PSMD7:PSMD3:PSMD11:PSMD14:RBBP5:CCND2:GPAM:RNF2:PSMF1:PSMB2:PRMT1:PSMA1:PSME3:H3F3B:CDK7:ACTL6A:PSMB7:PSMB6:PSMA5:PSMD4:PSMB4:PSMC2:CTLA4:PSMD6:PBRM1:PSMC3:UBB:SMARCC1:PSMD1:PSMD2:PTPN11:CBX6:PSMD13:H2AFX:WDR5:PSMD12:PRMT6:RING1:CSNK2B:PSMB10:UBA52:PSMB9:PSMB3
REACTOME_REGULATION_OF_CHOLESTEROL_BIOSYNTHESIS_BY_SREBP_SREBF	22	9	55	3.64967e-06	2.80556e-05	4.55198	CYP51A1:NFYC:IDI1:SREBF1:SCD:SQLE:KPNB1:SC5D:GPAM:MED1:RAN:CARM1:SEC24D:PMVK:MVD:FASN:ELOVL6:DHCR7:SEC24C:TBL1XR1:SREBF2:ACACA
REACTOME_METABOLISM_OF_NUCLEOTIDES	33	16	99	4.3643e-06	3.3378e-05	4.47654	AK2:TYMP:ADSS:CAD:GSR:IMPDH1:UMPS:AMPD2:NT5C:ITPA:PAICS:PPAT:DCTD:NUDT15:TXN:ATIC:UCK2:GUK1:ADK:GART:AK4:GMPS:NUDT5:HPRT1:NUDT9:CTPS1:IMPDH2:PFAS:DCTPP1:PNP:APRT:NME1:ADSL
REACTOME_DEUBIQUITINATION	76	48	298	4.80955e-06	3.65966e-05	4.43656	PSMB1:PSMC4:PSMA4:RHOA:ACTB:KEAP1:PSMC5:MUL1:PSME1:PSMD5:PSMD8:JOSD1:PSMC6:PSMA3:PSMB5:PSME2:PSMA7:PSMD7:USP10:CCP110:RIPK2:TGFB1:PSMD3:PSMD11:PSMD14:UCHL5:RAD23B:IDE:TRIM25:PSMF1:PSMB2:BECN1:TRAF2:PSMA1:ADRM1:PSME3:USP37:ACTL6A:PSMB7:STAMBPL1:TP53:PSMB6:PSMA5:INO80C:USP16:PSMD4:PSMB4:PSMC2:PSMD6:BAP1:USP49:VCP:VDAC2:PSMC3:TAF10:OTUB1:TNIP2:UBB:HCFC1:RCE1:PSMD1:PSMD2:RUVBL1:RAD23A:HGS:PSMD13:MCRS…
REACTOME_PROTEIN_UBIQUITINATION	28	13	79	4.89995e-06	3.70961e-05	4.43067	PAF1:UBA6:UBE2A:UBE2K:UBE2S:PEX12:UBA1:UBE2D2:UBE2G1:DERL1:RTF1:WDR61:PEX14:RRAGA:PEX10:UBE2Z:UBE2J2:VCP:LEO1:UBE2V2:UBE2E3:UBE2E1:UBB:UBE2N:UBE2L3:CTR9:UBA52:PRKDC
REACTOME_DNA_DAMAGE_RECOGNITION_IN_GG_NER	17	7	38	4.98281e-06	3.75338e-05	4.42558	ACTB:RBX1:RAD23B:ACTL6A:COPS4:COPS3:COPS7B:INO80C:COPS2:DDB1:COPS6:GPS1:UBB:RUVBL1:RAD23A:MCRS1:UBA52
REACTOME_ACTIVATION_OF_GENE_EXPRESSION_BY_SREBF_SREBP	18	7	42	6.38178e-06	4.78314e-05	4.32029	CYP51A1:NFYC:IDI1:SREBF1:SCD:SQLE:SC5D:GPAM:MED1:CARM1:PMVK:MVD:FASN:ELOVL6:DHCR7:TBL1XR1:SREBF2:ACACA
REACTOME_BUTYRATE_RESPONSE_FACTOR_1_BRF1_BINDS_AND_DESTABILIZES_MRNA	10	3	17	7.47398e-06	5.54628e-05	4.256	EXOSC5:DIS3:EXOSC3:EXOSC8:EXOSC9:EXOSC2:MAPKAPK2:YWHAB:EXOSC1:EXOSC4
REACTOME_KSRP_KHSRP_BINDS_AND_DESTABILIZES_MRNA	10	3	17	7.47398e-06	5.54628e-05	4.256	EXOSC5:DIS3:KHSRP:EXOSC3:EXOSC8:EXOSC9:EXOSC2:YWHAZ:EXOSC1:EXOSC4
REACTOME_CYTOKINE_SIGNALING_IN_IMMUNE_SYSTEM	181	136	856	7.654e-06	5.6519e-05	4.24781	MAP3K14:PSMB1:IL32:RANBP9:PPP5C:PSMC4:NUP160:PSMA4:CUL1:NDC1:NUP133:CDC42:FBXW11:EIF4G3:ACTB:DLG1:PTPN23:NFKB2:ARAF:HSP90AA1:IL12RB2:TXLNA:SEH1L:PSMC5:RPLP0:PEBP1:ICAM1:PSME1:NUP50:PSMD5:NUP188:JAK2:IL12RB1:PSMD8:MTAP:CRKL:OSM:MAPK1:IL2RB:RBX1:PSMC6:PSMA3:PSMB5:PSME2:RAE1:PSMA7:TRIB3:KPNA3:NUP93:PSMD7:RIPK2:NFKBIB:AKT2:TGFB1:PPP2R1A:JAK3:RAPGEF1:PSMD3:KPNB1:NUP88:PSMD11:DUSP3:HSPA8:EIF4G2:NUP98:O…
REACTOME_SIGNALING_BY_FGFR2	26	12	73	8.77189e-06	6.44562e-05	4.19074	PTBP1:POLR2B:HNRNPM:POLR2E:MAPK1:POLR2F:RBFOX2:POLR2C:POLR2I:PPP2R1A:PPP2CA:GTF2F1:NCBP1:POLR2D:POLR2K:POLR2H:HNRNPF:UBB:HRAS:POLR2L:GRB2:PTPN11:POLR2A:GTF2F2:NRAS:UBA52
REACTOME_APC_C:CDC20_MEDIATED_DEGRADATION_OF_CYCLIN_B	12	4	23	9.03443e-06	6.60615e-05	4.18005	ANAPC5:CDC23:CDC16:CCNB1:ANAPC11:ANAPC1:ANAPC10:UBE2E1:UBB:CDC26:ANAPC7:UBA52
REACTOME_ADAPTIVE_IMMUNE_SYSTEM	172	129	811	1.07103e-05	7.79355e-05	4.10826	MAP3K14:PSMB1:UBE3C:PSMC4:RNF14:SLAMF7:UBA6:PSMA4:CUL1:SEC61A1:RNF4:BTBD1:CDC42:FBXW11:PVR:RAB7A:UBE2A:UBE2K:UBE2D4:KEAP1:HUWE1:PSMC5:FKBP1A:ANAPC5:LAG3:ICAM1:PSME1:CDC23:PSMD5:PSMD8:AP1B1:RBX1:PSMC6:PSMA3:PSMB5:PSME2:PSMA7:TRIB3:KIF3B:PSMD7:RIPK2:DCTN6:NFKBIB:AKT2:PPP2R1A:NPDC1:PPP3CB:CUL2:UBE2S:PSMD3:TRIM37:PSMD11:UBE4A:PTPN6:PPP2CA:RNF7:ACTR1B:PSMD14:RAP1A:CAPZA1:FBXO6:MAPKAP1:RBBP6:CLTA:PSMF1…
REACTOME_TELOMERE_EXTENSION_BY_TELOMERASE	5	1	6	1.56932e-05	0.000113096	3.94655	DKC1:NHP2:TERT:RUVBL1:RUVBL2
REACTOME_SYNTHESIS_OF_DOLICHYL_PHOSPHATE	5	1	6	1.56932e-05	0.000113096	3.94655	DHDDS:SRD5A3:DOLPP1:MVD:DOLK
REACTOME_SIGNALING_BY_INTERLEUKINS	138	100	631	1.58919e-05	0.00011398	3.94317	PSMB1:IL32:RANBP9:PPP5C:PSMC4:PSMA4:CUL1:CDC42:FBXW11:ACTB:DLG1:PTPN23:NFKB2:ARAF:HSP90AA1:IL12RB2:TXLNA:PSMC5:RPLP0:PEBP1:ICAM1:PSME1:PSMD5:JAK2:IL12RB1:PSMD8:MTAP:CRKL:OSM:MAPK1:IL2RB:RBX1:PSMC6:PSMA3:PSMB5:PSME2:PSMA7:TRIB3:PSMD7:RIPK2:NFKBIB:AKT2:TGFB1:PPP2R1A:JAK3:RAPGEF1:PSMD3:PSMD11:DUSP3:HSPA8:PTPN6:HSPA9:HBEGF:PPP2CA:CISH:MAPKAPK3:IL1A:PSMD14:STAT1:RAP1A:CAPZA1:TCP1:HNRNPA2B1:WDR83:IL1B:…
REACTOME_OTHER_INTERLEUKIN_SIGNALING	72	46	288	1.72903e-05	0.00012342	3.90861	PSMB1:IL32:RANBP9:PPP5C:PSMC4:PSMA4:ACTB:DLG1:ARAF:TXLNA:PSMC5:PEBP1:PSME1:PSMD5:JAK2:PSMD8:MAPK1:IL2RB:RBX1:PSMC6:PSMA3:PSMB5:PSME2:PSMA7:TRIB3:PSMD7:AKT2:PPP2R1A:JAK3:PSMD3:PSMD11:HBEGF:PPP2CA:PSMD14:RAP1A:WDR83:PSMF1:PSMB2:PSMA1:PSME3:RAF1:PSMB7:PPP2R1B:PDPK1:PSMB6:PSMA5:PPP2R5E:PSMD4:PSMB4:PSMC2:PSMD6:DUSP7:PSMC3:YWHAB:PHB:UBB:MAP3K11:PSMD1:HRAS:PSMD2:GRB2:PTPN11:ACTG1:IFNLR1:PSMD13:PIK3R4:PS…
REACTOME_TP53_REGULATES_METABOLIC_GENES	28	14	84	1.93504e-05	0.000137471	3.86179	RRAGD:GSR:GPI:AKT2:YWHAE:COX6A1:COX7A2L:PRDX1:COX7B:SCO1:COX16:LAMTOR5:YWHAQ:TACO1:TXN:LRPPRC:TP53:RRAGA:G6PD:COX6C:YWHAZ:YWHAB:MLST8:DDIT4:YWHAG:COX5A:PRKAG1:MTOR
REACTOME_ASPARAGINE_N_LINKED_GLYCOSYLATION	75	49	304	1.96549e-05	0.000138322	3.85911	DPM1:ALG1:TRAPPC3:LMAN1:SCFD1:ARCN1:GNPNAT1:TSTA3:DCTN6:COPE:YKT6:SEC23IP:MLEC:COPZ1:GMDS:TFG:MOGS:CHST10:CAPZA1:B4GALT2:DHDDS:RPN2:RAD23B:PPP6C:COPA:CANX:SRD5A3:COPB1:MPDU1:DAD1:DCTN4:STT3A:DPM2:DERL1:RAB1A:PREB:ACTR1A:USO1:RNF185:ARF1:GMPPA:DYNC1LI1:FUOM:SEC24D:SEC13:B4GALT3:ALG8:NEU3:VCP:TMED3:DCTN5:DOLPP1:MVD:TRAPPC2L:TUBA1C:LMAN2:NANP:UBB:DPAGT1:MANEA:DOLK:SEC24C:CALR:COPG1:SLC35C1:COPB2:TUB…
REACTOME_HSP90_CHAPERONE_CYCLE_FOR_STEROID_HORMONE_RECEPTORS_SHR	21	9	56	1.9606e-05	0.000138322	3.85911	FKBP4:DNAJA2:HSP90AA1:DNAJA1:HSP90AB1:DCTN6:HSPA8:PTGES3:CAPZA1:DCTN4:ACTR1A:DNAJA4:DYNC1LI1:DCTN5:TUBA1C:STIP1:TUBB4B:CAPZA2:HSPA1B:HSPA1A:DYNLL2
REACTOME_REGULATION_OF_PTEN_GENE_TRANSCRIPTION	22	10	60	2.04634e-05	0.000143339	3.84363	KDM1A:SCMH1:RRAGD:MBD3:MAPK1:RBBP7:EZH2:ATN1:RNF2:LAMTOR5:TP53:MTA2:RRAGA:RBBP4:GATAD2A:MLST8:SUZ12:MAF1:MTA1:CBX6:MTOR:RING1
REACTOME_MITOTIC_PROPHASE	41	23	141	2.07765e-05	0.000144856	3.83906	VRK2:NUP160:NDC1:NUP133:SEH1L:NUP50:NUP188:MAPK1:RAE1:LPIN2:EMD:NUP93:PPP2R1A:NUP88:NUP98:NUP107:NUP155:PPP2CA:SET:NUP153:NUP85:NUP214:ARPP19:H3F3B:CCNB1:NUPL2:PPP2R1B:RAB1A:NUP54:USO1:ENSA:MCPH1:NUP205:SEC13:NUP35:BANF1:CTDNEP1:H2AFX:POM121:NUP62:POM121C
REACTOME_UB_SPECIFIC_PROCESSING_PROTEASES	58	36	221	2.16292e-05	0.000150103	3.82361	PSMB1:PSMC4:PSMA4:KEAP1:PSMC5:MUL1:PSME1:PSMD5:PSMD8:PSMC6:PSMA3:PSMB5:PSME2:PSMA7:PSMD7:USP10:CCP110:PSMD3:PSMD11:PSMD14:IDE:PSMF1:PSMB2:BECN1:TRAF2:PSMA1:ADRM1:PSME3:USP37:PSMB7:TP53:PSMB6:PSMA5:USP16:PSMD4:PSMB4:PSMC2:PSMD6:USP49:VDAC2:PSMC3:TAF10:OTUB1:UBB:RCE1:PSMD1:PSMD2:RUVBL1:HGS:PSMD13:TRRAP:PSMD12:PSMB10:VDAC1:UBA52:PSMB9:IKBKG:PSMB3
REACTOME_PERK_REGULATES_GENE_EXPRESSION	14	5	31	2.24001e-05	0.000154736	3.81041	NFYC:EXOSC5:DIS3:KHSRP:EXOSC3:EXOSC8:EXOSC9:EIF2S2:ATF4:EXOSC2:EIF2S3:EIF2S1:EXOSC1:EXOSC4
REACTOME_APC_CDC20_MEDIATED_DEGRADATION_OF_NEK2A	12	4	25	3.00335e-05	0.000206515	3.68505	ANAPC5:CDC23:CDC16:ANAPC11:ANAPC1:BUB3:ANAPC10:UBE2E1:UBB:CDC26:ANAPC7:UBA52
REACTOME_PHOSPHORYLATION_OF_THE_APC_C	10	4	19	3.34977e-05	0.000229284	3.63963	ANAPC5:CDC23:CDC16:CCNB1:ANAPC11:ANAPC1:ANAPC10:UBE2E1:CDC26:ANAPC7
REACTOME_AXON_GUIDANCE	122	88	554	3.40906e-05	0.000232281	3.63399	PSMB1:RANBP9:LYPLA2:PSMC4:RPL26L1:PSMA4:RHOA:CSNK2A2:CDC42:ACTB:DLG1:HSP90AA1:RPS5:PSMC5:RPLP0:EFNB1:PSME1:EZR:PSMD5:HSP90AB1:PSMD8:MAPK1:MYH9:RBX1:PSMC6:PSMA3:PSMB5:PSME2:PSMA7:CSNK2A1:PSMD7:RPS19:PPP3CB:CUL2:GIT1:PSMD3:CASC3:PSMD11:HSPA8:RPS13:MAGOHB:ARPC3:RPL24:EIF4G1:ACTR3:PSMD14:RPS15:RPL5:CLTA:UPF3B:RPL23:PSMF1:PSMB2:PSMA1:RPL36:PAK4:PSME3:RPL27:VAV3:PSMB7:NCBP1:RPL35:RPLP1:RPS24:CLTC:EIF4A…
REACTOME_SIGNALING_BY_WNT	78	52	327	4.91548e-05	0.000333407	3.47702	DVL2:PSMB1:PSMC4:RUNX3:PSMA4:CUL1:RHOA:VPS35:CSNK2A2:GNB1:XPO1:PSMC5:PSME1:PSMD5:PSMD8:RBX1:PSMC6:PSMA3:PSMB5:PSME2:PSMA7:CSNK2A1:PSMD7:FZD3:AKT2:PPP2R1A:PPP3CB:PSMD3:PSMD11:PPP2CA:PSMD14:RBBP5:CLTA:VPS26A:PSMF1:PSMB2:PSMA1:NFATC1:PSME3:H3F3B:PSMB7:PPP2R1B:CLTC:PSMB6:PSMA5:PPP2R5E:PSMD4:PSMB4:PSMC2:LRP5:FZD5:PSMD6:RYK:TERT:YWHAZ:FZD6:PSMC3:LEO1:UBB:KAT5:PSMD1:GNG5:PSMD2:CLTB:RUVBL1:SCRIB:AMER1:PS…
REACTOME_E3_UBIQUITIN_LIGASES_UBIQUITINATE_TARGET_PROTEINS	21	10	59	5.07184e-05	0.000342464	3.46539	PAF1:UBE2A:PEX12:UBE2D2:DERL1:RTF1:WDR61:PEX14:RRAGA:PEX10:UBE2J2:VCP:LEO1:UBE2V2:UBE2E1:UBB:UBE2N:UBE2L3:CTR9:UBA52:PRKDC
REACTOME_MITOTIC_SPINDLE_CHECKPOINT	33	18	110	5.43883e-05	0.000365597	3.437	NUP160:NUP133:XPO1:SEH1L:ZW10:ANAPC5:NUDC:CDC23:RANGAP1:MAPRE1:PPP2R1A:NUP98:NUP107:PPP2CA:NUP85:CDC16:PPP2R1B:ANAPC11:DYNC1LI1:ANAPC1:PPP2R5E:BUB3:SEC13:PMF1:ANAPC10:UBE2E1:CKAP5:CDC26:RCC2:PPP1CC:CENPP:ANAPC7:DYNLL2
REACTOME_INHIBITION_OF_THE_PROTEOLYTIC_ACTIVITY_OF_APC_C_REQUIRED_FOR_THE_ONSET_OF_ANAPHASE_BY_MITOTIC_SPINDLE_CHECKPOINT_COMPONENTS	10	4	20	6.37906e-05	0.000426884	3.36969	ANAPC5:CDC23:CDC16:ANAPC11:ANAPC1:BUB3:ANAPC10:UBE2E1:CDC26:ANAPC7
REACTOME_SYNTHESIS_OF_ACTIVE_UBIQUITIN:_ROLES_OF_E1_AND_E2_ENZYMES	13	5	30	6.97932e-05	0.000464978	3.33257	UBA6:UBE2A:UBE2K:UBE2S:UBA1:UBE2D2:UBE2G1:UBE2Z:UBE2E3:UBE2E1:UBB:UBE2L3:UBA52
REACTOME_HSF1_ACTIVATION	13	5	31	0.000108823	0.000721794	3.14159	FKBP4:HSP90AA1:HSP90AB1:YWHAE:PTGES3:MRPL18:HSPH1:VCP:UBB:HSF1:HSPA1B:HSPA1A:HSBP1
REACTOME_ACTIVATION_OF_BAD_AND_TRANSLOCATION_TO_MITOCHONDRIA	8	3	15	0.000123855	0.000817879	3.08731	BID:AKT2:YWHAE:YWHAQ:YWHAZ:YWHAB:YWHAG:PPP3R1
REACTOME_ATTENUATION_PHASE	12	5	28	0.000135424	0.000890357	3.05044	FKBP4:HSP90AA1:HSP90AB1:HSPA8:PTGES3:MRPL18:HSPH1:UBB:HSF1:HSPA1B:HSPA1A:HSBP1
REACTOME_SIGNALING_BY_FGFR2_IN_DISEASE	16	7	43	0.00015554	0.00101814	2.99219	POLR2B:POLR2E:POLR2F:POLR2C:POLR2I:GTF2F1:NCBP1:POLR2D:POLR2K:POLR2H:HRAS:POLR2L:GRB2:POLR2A:GTF2F2:NRAS
REACTOME_INTRINSIC_PATHWAY_FOR_APOPTOSIS	18	9	51	0.000165069	0.00107117	2.97014	BID:BAX:MAPK1:AKT2:YWHAE:YWHAQ:NMT1:TP53:APIP:YWHAZ:CASP7:YWHAB:STAT3:AVEN:YWHAG:BCL2L1:PPP3R1:DYNLL2
REACTOME_COMPLEX_I_BIOGENESIS	19	9	55	0.000164821	0.00107117	2.97014	NDUFAB1:NDUFB2:NDUFB7:NDUFAF5:NDUFA1:ECSIT:NDUFAF1:NDUFA9:NDUFS6:NDUFB9:NDUFC2:NDUFV3:NDUFB6:NDUFA3:TMEM126B:ACAD9:NDUFAF3:NDUFA6:NDUFS3
REACTOME_MASTL_FACILITATES_MITOTIC_PROGRESSION	6	2	10	0.000190656	0.00123187	2.90944	PPP2R1A:PPP2CA:ARPP19:CCNB1:PPP2R1B:ENSA
REACTOME_CITRIC_ACID_CYCLE_TCA_CYCLE	10	4	22	0.000196882	0.00126664	2.89735	CS:ME2:DLD:ACO2:IDH3B:SDHB:DLST:SUCLA2:IDH3A:SDHD
REACTOME_NEGATIVE_REGULATION_OF_MAPK_PATHWAY	15	7	40	0.000205882	0.00131887	2.8798	PPP5C:ARAF:PEBP1:MAPK1:PPP2R1A:PPP2CA:RAF1:PPP2R1B:PPP2R5E:DUSP7:YWHAB:UBB:HRAS:NRAS:UBA52
REACTOME_CONVERSION_FROM_APC_C:CDC20_TO_APC_C:CDH1_IN_LATE_ANAPHASE	9	4	19	0.000225502	0.00143842	2.84212	ANAPC5:CDC23:CDC16:ANAPC11:ANAPC1:ANAPC10:UBE2E1:CDC26:ANAPC7
REACTOME_FGFR2_MUTANT_RECEPTOR_ACTIVATION	13	6	33	0.000245789	0.00156118	2.80655	POLR2B:POLR2E:POLR2F:POLR2C:POLR2I:GTF2F1:NCBP1:POLR2D:POLR2K:POLR2H:POLR2L:POLR2A:GTF2F2
REACTOME_AUTOPHAGY	31	18	109	0.000258519	0.0016351	2.78645	RRAGD:CSNK2A2:HSP90AA1:CHMP2B:HSP90AB1:TOMM22:CSNK2A1:CHMP4B:HSPA8:MFN2:BECN1:TOMM40:CHMP2A:LAMTOR5:ATG3:PLIN2:RRAGA:SQSTM1:UBAP1:MLST8:UBB:CHMP6:PRKAG1:PIK3R4:ATG7:MTOR:CSNK2B:VDAC1:UBA52:PGAM5:DYNLL2
REACTOME_ATF4_ACTIVATES_GENES_IN_RESPONSE_TO_ENDOPLASMIC_RETICULUM_STRESS	11	5	26	0.000263187	0.00165764	2.78051	NFYC:EXOSC5:DIS3:KHSRP:EXOSC3:EXOSC8:EXOSC9:ATF4:EXOSC2:EXOSC1:EXOSC4
REACTOME_RUNX1_INTERACTS_WITH_CO_FACTORS_WHOSE_PRECISE_EFFECT_ON_RUNX1_TARGETS_IS_NOT_KNOWN	14	6	37	0.000271766	0.00170451	2.7684	SCMH1:SMARCD1:CBFB:CSNK2A2:SMARCE1:SMARCB1:CSNK2A1:RNF2:ACTL6A:PBRM1:SMARCC1:CBX6:RING1:CSNK2B
REACTOME_SIGNALING_BY_FGFR	26	14	87	0.000286286	0.00178809	2.74761	PTBP1:POLR2B:HNRNPM:POLR2E:MAPK1:POLR2F:RBFOX2:POLR2C:POLR2I:PPP2R1A:PPP2CA:GTF2F1:NCBP1:POLR2D:POLR2K:POLR2H:HNRNPF:UBB:HRAS:POLR2L:GRB2:PTPN11:POLR2A:GTF2F2:NRAS:UBA52
REACTOME_RAF_ACTIVATION	12	5	30	0.000317359	0.00197395	2.70466	ARAF:JAK2:PPP2R1A:PPP2CA:RAF1:PPP2R1B:PPP2R5E:YWHAB:PHB:MAP3K11:HRAS:NRAS
REACTOME_MITOCHONDRIAL_CALCIUM_ION_TRANSPORT	10	4	23	0.000323597	0.00200443	2.69801	PMPCB:AFG3L2:STOML2:VDAC2:PMPCA:PHB:LETM1:PARL:VDAC1:PHB2
REACTOME_HUR_ELAVL1_BINDS_AND_STABILIZES_MRNA	5	2	8	0.000328645	0.00201901	2.69486	ELAVL1:XPO1:SET:NUP214:ANP32A
REACTOME_DNA_DAMAGE_REVERSAL	5	2	8	0.000328645	0.00201901	2.69486	ASCC2:ASCC3:ASCC1:ALKBH3:ALKBH2
REACTOME_HSF1_DEPENDENT_TRANSACTIVATION	14	7	38	0.000383896	0.00234882	2.62915	FKBP4:HSP90AA1:HSP90AB1:HSPA8:PTGES3:MRPL18:HSPH1:MLST8:UBB:HSF1:MTOR:HSPA1B:HSPA1A:HSBP1
REACTOME_MYD88_CASCADE_INITIATED_ON_PLASMA_MEMBRANE	25	14	84	0.000385645	0.00234992	2.62895	CUL1:FBXW11:NFKB2:MAPK1:RIPK2:NFKBIB:PPP2R1A:DUSP3:PPP2CA:MAPKAPK3:ELK1:ECSIT:PPP2R1B:TAB3:MAPKAPK2:DUSP7:NKIRAS2:TNIP2:UBB:MYD88:UBE2N:IRAK1:CHUK:UBA52:IKBKG
REACTOME_SUMOYLATION_OF_TRANSCRIPTION_FACTORS	9	4	20	0.000387213	0.00234993	2.62894	TP53BP1:PIAS2:UBE2I:PIAS4:SUMO1:TP53:HIC1:MTA1:SUMO2
REACTOME_COOPERATION_OF_PDCL_PHLP1_AND_TRIC_CCT_IN_G_PROTEIN_BETA_FOLDING	15	7	42	0.000398237	0.00240708	2.61851	GNAI3:CSNK2A2:GNB1:CSNK2A1:CCT4:TCP1:CCT7:CCT6A:CCT5:CCT8:CCT3:CCT2:GNG5:GNG2:CSNK2B
REACTOME_MAPK_FAMILY_SIGNALING_CASCADES	68	47	296	0.000437491	0.00263373	2.57943	PSMB1:RANBP9:PPP5C:PSMC4:PSMA4:CDC42:ACTB:DLG1:ARAF:XPO1:PSMC5:PEBP1:PSME1:PSMD5:JAK2:PSMD8:MAPK1:IL2RB:RBX1:PSMC6:PSMA3:PSMB5:PSME2:PSMA7:PSMD7:PPP2R1A:JAK3:PSMD3:PSMD11:HBEGF:PPP2CA:PSMD14:RAP1A:WDR83:NCOA3:PSMF1:PSMB2:PSMA1:PSME3:RAF1:PSMB7:PPP2R1B:PSMB6:PSMA5:PPP2R5E:PSMD4:PSMB4:PSMC2:PSMD6:DUSP7:PSMC3:YWHAB:PHB:UBB:MAP3K11:PSMD1:HRAS:PSMD2:GRB2:PTPN11:ACTG1:PSMD13:PSMD12:PSMB10:NRAS:UBA52:PS…
REACTOME_RIP_MEDIATED_NFKB_ACTIVATION_VIA_ZBP1	8	3	17	0.000444544	0.00266549	2.57422	NFKB2:NFKBIB:TICAM1:DHX9:NKIRAS2:MYD88:CHUK:IKBKG
REACTOME_SIGNALING_BY_FGFR_IN_DISEASE	20	10	63	0.000456039	0.00272352	2.56487	POLR2B:POLR2E:POLR2F:POLR2C:POLR2I:CPSF6:STAT1:GTF2F1:NCBP1:POLR2D:POLR2K:BAG4:POLR2H:STAT3:HRAS:POLR2L:GRB2:POLR2A:GTF2F2:NRAS
REACTOME_TRANS_GOLGI_NETWORK_VESICLE_BUDDING	22	12	72	0.000498682	0.00296636	2.52778	M6PR:TFRC:AP4E1:FTL:NECAP1:AP1B1:BLOC1S6:RAB5C:HSPA8:CLINT1:CLTA:CHMP2A:AP4B1:CLTC:SNAPIN:ARF1:AP1S3:AP1G1:CLTB:AP3S1:GAK:HGS
REACTOME_LYSOSOME_VESICLE_BIOGENESIS	13	6	35	0.00050976	0.00302028	2.51995	M6PR:AP4E1:AP1B1:HSPA8:CLTA:CHMP2A:AP4B1:CLTC:ARF1:AP1S3:AP1G1:CLTB:HGS
REACTOME_UPTAKE_AND_FUNCTION_OF_DIPHTHERIA_TOXIN	4	1	6	0.000517356	0.00302936	2.51865	HSP90AA1:HSP90AB1:HBEGF:EEF2
REACTOME_GDP_FUCOSE_BIOSYNTHESIS	4	1	6	0.000517356	0.00302936	2.51865	TSTA3:GMDS:FUOM:SLC35C1
REACTOME_ESTROGEN_STIMULATED_SIGNALING_THROUGH_PRKCZ	4	1	6	0.000517356	0.00302936	2.51865	MAPK1:PDPK1:HRAS:NRAS
REACTOME_MACROAUTOPHAGY	26	15	90	0.000523069	0.0030509	2.51557	RRAGD:CSNK2A2:CHMP2B:TOMM22:CSNK2A1:CHMP4B:MFN2:BECN1:TOMM40:CHMP2A:LAMTOR5:ATG3:RRAGA:SQSTM1:MLST8:UBB:CHMP6:PRKAG1:PIK3R4:ATG7:MTOR:CSNK2B:VDAC1:UBA52:PGAM5:DYNLL2
REACTOME_TOLL_LIKE_RECEPTOR_9_TLR9_CASCADE	27	16	95	0.000570586	0.00331515	2.4795	CUL1:FBXW11:NFKB2:MAPK1:RIPK2:NFKBIB:PPP2R1A:DUSP3:PPP2CA:MAPKAPK3:ELK1:TICAM1:ECSIT:PPP2R1B:TAB3:MAPKAPK2:DUSP7:NKIRAS2:TNIP2:UBB:MYD88:UBE2N:IRAK1:PIK3R4:CHUK:UBA52:IKBKG
REACTOME_SLC_TRANSPORTER_DISORDERS	28	16	100	0.000615424	0.00356185	2.44832	NUP160:NDC1:NUP133:SEH1L:NUP50:NUP188:RAE1:NUP93:NUP88:NUP98:NUP107:NUP155:SLC2A1:NUP153:NUP85:NUP214:NUPL2:NUP54:SLC39A4:NUP205:SEC13:NUP35:SLC27A4:BSG:SLC35C1:POM121:NUP62:POM121C
REACTOME_UNFOLDED_PROTEIN_RESPONSE_UPR	26	15	91	0.000633462	0.00365215	2.43745	EXTL3:NFYC:EXOSC5:DIS3:KHSRP:GSK3A:EXOSC3:ZBTB17:EXOSC8:SERP1:EXOSC9:SSR1:EIF2S2:ATF4:EXOSC2:EIF2S3:EIF2S1:PREB:HDGF:CXXC1:EXOSC1:YIF1A:EXOSC4:CALR:CREB3L2:GFPT1
REACTOME_GOLGI_ASSOCIATED_VESICLE_BIOGENESIS	18	9	56	0.000654818	0.00376081	2.42472	TFRC:AP4E1:FTL:NECAP1:AP1B1:BLOC1S6:RAB5C:HSPA8:CLINT1:CLTA:AP4B1:CLTC:SNAPIN:ARF1:AP1S3:AP1G1:AP3S1:GAK
REACTOME_TRIF_TICAM1_MEDIATED_TLR4_SIGNALING	27	16	97	0.000821296	0.00469894	2.328	CUL1:FBXW11:NFKB2:MAPK1:RIPK2:NFKBIB:PPP2R1A:DUSP3:PPP2CA:MAPKAPK3:ELK1:TICAM1:UBE2D2:PPP2R1B:TAB3:MAPKAPK2:DUSP7:FADD:NKIRAS2:TNIP2:UBB:UBE2N:PTPN11:IRAK1:CHUK:UBA52:IKBKG
REACTOME_INTEGRATION_OF_PROVIRUS	5	2	9	0.000853312	0.00482685	2.31634	XRCC5:HMGA1:BANF1:PPIA:XRCC6
REACTOME_CALCINEURIN_ACTIVATES_NFAT	5	2	9	0.000853312	0.00482685	2.31634	FKBP1A:PPP3CB:NFATC1:PPIA:PPP3R1
REACTOME_INTERLEUKIN_23_SIGNALING	5	2	9	0.000853312	0.00482685	2.31634	JAK2:IL12RB1:STAT4:STAT3:P4HB
REACTOME_MRNA_DECAY_BY_5_TO_3_EXORIBONUCLEASE	7	3	15	0.000880448	0.00496162	2.30438	EDC4:LSM5:LSM4:PATL1:LSM3:LSM1:EDC3
REACTOME_MITOPHAGY	11	5	29	0.000890212	0.00497921	2.30284	CSNK2A2:TOMM22:CSNK2A1:MFN2:TOMM40:SQSTM1:UBB:CSNK2B:VDAC1:UBA52:PGAM5
REACTOME_PIWI_INTERACTING_RNA_PIRNA_BIOGENESIS	11	5	29	0.000890212	0.00497921	2.30284	POLR2B:HSP90AA1:POLR2E:POLR2F:POLR2C:POLR2I:POLR2D:POLR2K:POLR2H:POLR2L:POLR2A
REACTOME_METABOLISM_OF_CARBOHYDRATES	66	47	293	0.000910338	0.00507285	2.29475	SLC25A13:MDH1:NUP160:NDC1:PHKA1:PKM:HYAL2:NUP133:NDST1:ENO1:SEH1L:NUP50:NUP188:PCK2:RAE1:PRPS2:PGK1:NUP93:GPI:PPP2R1A:ENO3:NUP88:NUP98:NUP107:TPI1:ARSB:GNPDA1:NUP155:PPP2CA:GBE1:SLC2A1:B4GALT2:AKR1A1:CHPF:SDC4:NUP153:GOT2:NUP85:NUP214:NUPL2:HS6ST1:PPP2R1B:NUP54:SORD:PGD:PRPS1:ALDOA:EXT2:NUP205:SEC13:SLC35B2:B4GALT3:HK2:SLC37A1:G6PD:NUP35:GNPDA2:GYG1:TKT:UBB:PGAM1:TALDO1:POM121:NUP62:UBA52:POM121C
REACTOME_JOSEPHIN_DOMAIN_DUBS	6	2	12	0.000937367	0.00518492	2.28526	JOSD1:RAD23B:VCP:UBB:RAD23A:UBA52
REACTOME_INTERLEUKIN_35_SIGNALLING	6	2	12	0.000937367	0.00518492	2.28526	IL12RB2:JAK2:STAT1:CANX:STAT4:STAT3
REACTOME_MTORC1_MEDIATED_SIGNALLING	9	4	22	0.000999808	0.00550997	2.25885	RRAGD:EIF4B:EIF4G1:LAMTOR5:RRAGA:YWHAB:MLST8:EIF4EBP1:MTOR
REACTOME_FORMATION_OF_TUBULIN_FOLDING_INTERMEDIATES_BY_CCT_TRIC	10	5	26	0.00116776	0.00641199	2.19301	CCT4:TCP1:CCT7:CCT6A:CCT5:CCT8:CCT3:CCT2:TUBA1C:TUBB4B
REACTOME_RNA_POLYMERASE_I_TRANSCRIPTION	29	18	109	0.00127899	0.00699709	2.15508	MNAT1:ZNRD1:MBD3:RRN3:POLR2E:POLR2F:RBBP7:TWISTNB:GTF2H1:GTF2H3:TBP:TAF1B:TTF1:H3F3B:MBD2:CDK7:POLR1E:TAF1A:GTF2H2:POLR2K:MTA2:RBBP4:ERCC3:POLR2H:GATAD2A:POLR2L:MTA1:POLR1D:H2AFX
REACTOME_MITOTIC_PROMETAPHASE	47	32	198	0.00129827	0.00707674	2.15017	NUP160:NUP133:CSNK2A2:SMC1A:HSP90AA1:XPO1:SEH1L:ZW10:NUDC:RANGAP1:CSNK2A1:MAPRE1:CCP110:PPP2R1A:SMC3:YWHAE:NUP98:NUP107:PPP2CA:STAG1:PDS5A:NUP85:TUBGCP3:CCNB1:ODF2:PPP2R1B:HAUS2:TUBGCP4:ACTR1A:DYNC1LI1:HAUS6:PPP2R5E:BUB3:SEC13:PMF1:TUBA1C:YWHAG:CKAP5:SSNA1:RCC2:PPP1CC:TUBB4B:CENPP:CSNK2B:MZT1:DYNLL2:TUBGCP5
REACTOME_GLUCONEOGENESIS	12	6	34	0.00132315	0.00718623	2.1435	SLC25A13:MDH1:ENO1:PCK2:PGK1:GPI:ENO3:TPI1:GOT2:ALDOA:SLC37A1:PGAM1
REACTOME_SPRY_REGULATION_OF_FGF_SIGNALING	7	3	16	0.00151758	0.00810831	2.09107	MAPK1:PPP2R1A:PPP2CA:UBB:GRB2:PTPN11:UBA52
REACTOME_ACTIVATED_TAK1_MEDIATES_P38_MAPK_ACTIVATION	9	4	23	0.00151997	0.00810831	2.09107	RIPK2:MAPKAPK3:TAB3:MAPKAPK2:UBB:UBE2N:IRAK1:UBA52:IKBKG
REACTOME_STING_MEDIATED_INDUCTION_OF_HOST_IMMUNE_RESPONSES	7	3	16	0.00151758	0.00810831	2.09107	XRCC5:TRIM21:IFI16:STAT6:DDX41:XRCC6:PRKDC
REACTOME_MAP3K8_TPL2_DEPENDENT_MAPK1_3_ACTIVATION	7	3	16	0.00151758	0.00810831	2.09107	CUL1:FBXW11:TNIP2:UBB:CHUK:UBA52:IKBKG
REACTOME_PROCESSING_OF_SMDT1	7	3	16	0.00151758	0.00810831	2.09107	PMPCB:AFG3L2:STOML2:PMPCA:PHB:PARL:PHB2
REACTOME_2_LTR_CIRCLE_FORMATION	4	2	7	0.0015733	0.00833347	2.07917	XRCC5:HMGA1:BANF1:XRCC6
REACTOME_SUMO_IS_TRANSFERRED_FROM_E1_TO_E2_UBE2I_UBC9	4	2	7	0.0015733	0.00833347	2.07917	UBE2I:SUMO1:UBA2:SUMO2
REACTOME_BIOSYNTHESIS_OF_THE_N_GLYCAN_PRECURSOR_DOLICHOL_LIPID_LINKED_OLIGOSACCHARIDE_LLO_AND_TRANSFER_TO_A_NASCENT_PROTEIN	22	13	78	0.00169859	0.00896545	2.04743	DPM1:ALG1:GNPNAT1:TSTA3:GMDS:DHDDS:SRD5A3:MPDU1:DPM2:GMPPA:FUOM:ALG8:NEU3:DOLPP1:MVD:NANP:DPAGT1:DOLK:SLC35C1:GFPT1:NEU1:ALG3
REACTOME_CLATHRIN_MEDIATED_ENDOCYTOSIS	36	23	145	0.00171373	0.00901364	2.0451	M6PR:DVL2:EPN1:EPN2:TFRC:ACTB:CTTN:NECAP1:RAB5C:HSPA8:ARPC3:HBEGF:ACTR3:CLTA:TRIP10:LDLR:TOR1A:COPS4:COPS3:CLTC:SH3GL1:COPS7B:ARPC2:ARF6:COPS2:COPS6:GPS1:UBB:AGFG1:CLTB:GRB2:GAK:ACTG1:HGS:UBA52:ARPC1A
REACTOME_SUMOYLATION_OF_TRANSCRIPTION_COFACTORS	14	7	43	0.00172224	0.00902672	2.04447	SCMH1:PIAS2:UBE2I:PIAS4:SUMO1:PARK7:RNF2:TRIM28:SAFB:NPM1:SUMO2:NCOR2:DAXX:RING1
REACTOME_ERKS_ARE_INACTIVATED	6	3	13	0.00175406	0.00909804	2.04105	MAPK1:PPP2R1A:DUSP3:PPP2CA:PPP2R1B:DUSP7
REACTOME_P75NTR_RECRUITS_SIGNALLING_COMPLEXES	6	3	13	0.00175406	0.00909804	2.04105	RIPK2:SQSTM1:UBB:MYD88:IRAK1:UBA52
REACTOME_CHK1_CHK2_CDS1_MEDIATED_INACTIVATION_OF_CYCLIN_B:CDK1_COMPLEX	6	3	13	0.00175406	0.00909804	2.04105	YWHAE:CCNB1:YWHAQ:YWHAZ:YWHAB:YWHAG
REACTOME_ENDOSOMAL_SORTING_COMPLEX_REQUIRED_FOR_TRANSPORT_ESCRT	11	5	31	0.00177999	0.00920073	2.03618	VTA1:CHMP2B:CHMP4B:CHMP2A:VPS4A:SNF8:UBAP1:UBB:CHMP6:HGS:UBA52
REACTOME_FRS2_MEDIATED_ACTIVATION	5	2	10	0.0018473	0.00948321	2.02304	CRKL:MAPK1:RAPGEF1:RAP1A:YWHAB
REACTOME_PROCESSING_AND_ACTIVATION_OF_SUMO	5	2	10	0.0018473	0.00948321	2.02304	SENP1:UBE2I:SUMO1:UBA2:SUMO2
REACTOME_INTERFERON_SIGNALING	47	33	202	0.00202442	0.010357	1.98476	NUP160:NDC1:NUP133:EIF4G3:SEH1L:ICAM1:NUP50:NUP188:JAK2:RAE1:KPNA3:NUP93:KPNB1:NUP88:EIF4G2:NUP98:OAS3:NUP107:PTPN6:NUP155:EIF4G1:STAT1:SUMO1:TRIM25:NUP153:NUP85:NUP214:TRIM21:EIF4E2:NUPL2:NUP54:EIF4A3:NUP205:UBE2L6:SEC13:ADAR:NUP35:ABCE1:UBE2E1:UBB:UBE2N:PTPN11:POM121:PTPN1:NUP62:UBA52:POM121C
REACTOME_SIGNALING_BY_NOTCH	55	39	244	0.00211397	0.0107784	1.96745	PSMB1:PSMC4:PSMA4:CUL1:YBX1:PSMC5:PSME1:PSMD5:PSMD8:RBX1:PSMC6:PSMA3:SNW1:PSMB5:PSME2:PSMA7:POFUT1:PSMD7:PSMD3:PSMD11:CCNC:PSMD14:STAT1:PSMF1:PSMB2:PSMA1:PSME3:H3F3B:CDK8:PSMB7:TP53:PSMB6:PSMA5:NOTCH1:PSMD4:PSMB4:PSMC2:NCSTN:PSMD6:YWHAZ:PSMC3:UBB:PSMD1:ATP2A2:PSMD2:TBL1XR1:JAG2:PSMD13:H2AFX:NCOR2:PSMD12:PSMB10:UBA52:PSMB9:PSMB3
REACTOME_ESR_MEDIATED_SIGNALING	50	35	219	0.00236285	0.0120065	1.92058	FKBP4:KDM1A:PPP5C:POLR2B:GNAI3:CBFB:SMC1A:GNB1:HSP90AA1:XPO1:HSP90AB1:POLR2E:MAPK1:POLR2F:POLR2C:AKT2:POLR2I:SMC3:PTGES3:TBP:SRF:HBEGF:STAG1:GPAM:NCOA3:GTF2F1:MED1:PRMT1:ELK1:JUND:H3F3B:CDK9:GTF2A2:PDPK1:CARM1:POLR2D:POLR2K:UHMK1:POLR2H:PPID:KAT5:GNG5:HRAS:SPHK1:POLR2L:POLR2A:GNG2:GTF2F2:H2AFX:NRAS
REACTOME_SYNTHESIS_OF_PC	10	5	28	0.00239214	0.0120734	1.91817	CSNK2A2:STARD7:CSNK2A1:LPIN2:CHKA:CHPT1:PEMT:LPCAT1:PCYT1A:CSNK2B
REACTOME_BUDDING_AND_MATURATION_OF_HIV_VIRION	10	5	28	0.00239214	0.0120734	1.91817	VTA1:CHMP2B:CHMP4B:CHMP2A:VPS4A:UBAP1:UBB:CHMP6:PPIA:UBA52
REACTOME_SIGNALLING_TO_ERKS	11	6	32	0.00244302	0.0122478	1.91194	CRKL:MAPK1:RAPGEF1:MAPKAPK3:RAP1A:MAPK13:MAPKAPK2:YWHAB:HRAS:GRB2:NRAS
REACTOME_TAK1_ACTIVATES_NFKB_BY_PHOSPHORYLATION_AND_ACTIVATION_OF_IKKS_COMPLEX	11	6	32	0.00244302	0.0122478	1.91194	NFKB2:RIPK2:NFKBIB:TAB3:NKIRAS2:UBB:UBE2N:IRAK1:CHUK:UBA52:IKBKG
REACTOME_PLATELET_SENSITIZATION_BY_LDL	7	3	17	0.00247138	0.0123487	1.90838	PPP2R1A:PTPN6:PPP2CA:PPP2R1B:PPP2R5E:LRP8:PTPN11
REACTOME_GOLGI_TO_ER_RETROGRADE_TRANSPORT	33	22	133	0.00249722	0.0124363	1.90531	PAFAH1B3:ZW10:ARCN1:KIF3B:DCTN6:COPE:COPZ1:BNIP1:CAPZA1:RAB3GAP2:COPA:COPB1:DCTN4:RINT1:RAB1A:ACTR1A:KIF21A:GALNT2:ARF1:DYNC1LI1:AGPAT3:TMED3:DCTN5:TUBA1C:PAFAH1B2:STX18:KIF5B:KLC2:COPG1:COPB2:TUBB4B:CAPZA2:DYNLL2
REACTOME_INTERLEUKIN_17_SIGNALING	20	12	71	0.0025403	0.012609	1.89932	CUL1:FBXW11:MAPK1:RIPK2:PPP2R1A:DUSP3:PPP2CA:MAPKAPK3:ELK1:PPP2R1B:TAB3:MAPKAPK2:DUSP7:TNIP2:UBB:UBE2N:IRAK1:CHUK:UBA52:IKBKG
REACTOME_APOBEC3G_MEDIATED_RESISTANCE_TO_HIV_1_INFECTION	3	1	5	0.0027431	0.0134376	1.87168	HMGA1:BANF1:PPIA
REACTOME_FBXW7_MUTANTS_AND_NOTCH1_IN_CANCER	3	1	5	0.0027431	0.0134376	1.87168	CUL1:RBX1:NOTCH1
REACTOME_SUMO_IS_CONJUGATED_TO_E1_UBA2:SAE1	3	1	5	0.0027431	0.0134376	1.87168	SUMO1:UBA2:SUMO2
REACTOME_TFAP2A_ACTS_AS_A_TRANSCRIPTIONAL_REPRESSOR_DURING_RETINOIC_ACID_INDUCED_CELL_DIFFERENTIATION	3	1	5	0.0027431	0.0134376	1.87168	NOP2:HSPD1:NPM1
REACTOME_IRON_UPTAKE_AND_TRANSPORT	17	10	58	0.00281846	0.0137618	1.86132	ATP6V0A1:CUL1:TFRC:SLC46A1:FTL:MCOLN1:ATP6V1D:HMOX2:GLRX3:CAND1:ATP6V0E1:ATP6V0B:ATP6V1E1:ATP6V1B2:FLVCR1:UBB:UBA52
REACTOME_ZBP1_DAI_MEDIATED_INDUCTION_OF_TYPE_I_IFNS	8	4	21	0.0029463	0.0142929	1.84488	NFKB2:NFKBIB:TICAM1:DHX9:NKIRAS2:MYD88:CHUK:IKBKG
REACTOME_TP53_REGULATES_TRANSCRIPTION_OF_ADDITIONAL_CELL_CYCLE_GENES_WHOSE_EXACT_ROLE_IN_THE_P53_PATHWAY_REMAIN_UNCERTAIN	8	4	21	0.0029463	0.0142929	1.84488	CNOT3:PLAGL1:CNOT1:TP53:CNOT11:NPM1:CNOT10:CNOT7
REACTOME_IRAK1_RECRUITS_IKK_COMPLEX	6	3	14	0.00303118	0.0145168	1.83813	UBB:UBE2N:IRAK1:CHUK:UBA52:IKBKG
REACTOME_REGULATION_OF_IFNG_SIGNALING	6	3	14	0.00303118	0.0145168	1.83813	JAK2:PTPN6:STAT1:SUMO1:PTPN11:PTPN1
REACTOME_GLUTAMATE_AND_GLUTAMINE_METABOLISM	6	3	14	0.00303118	0.0145168	1.83813	OAT:GOT2:PYCR2:GLUD1:GLUD2:PYCR1
REACTOME_ERYTHROPOIETIN_ACTIVATES_RAS	6	3	14	0.00303118	0.0145168	1.83813	JAK2:CRKL:RAPGEF1:HRAS:GRB2:NRAS
REACTOME_REGULATION_OF_TP53_ACTIVITY	38	26	160	0.00317661	0.0151648	1.81916	TAF2:TAF11:CSNK2A2:MBD3:SUPT16H:PRMT5:CSNK2A1:RBBP8:RBBP7:NBN:AKT2:PPP2R1A:TBP:RAD1:PPP2CA:MAPKAP1:PPP2R1B:PDPK1:TP53:TAF5:SSRP1:MTA2:RBBP4:MEAF6:TAF10:GATAD2A:MLST8:UBB:KAT5:ATR:TOP3A:EHMT1:PRKAG1:NOC2L:MTOR:DAXX:CSNK2B:UBA52
REACTOME_RESOLUTION_OF_SISTER_CHROMATID_COHESION	31	20	125	0.00321263	0.0151916	1.8184	NUP160:NUP133:SMC1A:XPO1:SEH1L:ZW10:NUDC:RANGAP1:MAPRE1:PPP2R1A:SMC3:NUP98:NUP107:PPP2CA:STAG1:PDS5A:NUP85:CCNB1:PPP2R1B:DYNC1LI1:PPP2R5E:BUB3:SEC13:PMF1:TUBA1C:CKAP5:RCC2:PPP1CC:TUBB4B:CENPP:DYNLL2
REACTOME_REGULATION_OF_TP53_EXPRESSION_AND_DEGRADATION	12	6	37	0.00319813	0.0151916	1.8184	AKT2:PPP2R1A:PPP2CA:MAPKAP1:PPP2R1B:PDPK1:TP53:MLST8:UBB:MTOR:DAXX:UBA52
REACTOME_ANTIGEN_PRESENTATION:_FOLDING_ASSEMBLY_AND_PEPTIDE_LOADING_OF_CLASS_I_MHC	9	4	25	0.00320938	0.0151916	1.8184	CANX:SEC24D:SEC13:TAP1:SEC24C:CALR:BCAP31:TAP2:TAPBP
REACTOME_NEUTROPHIL_DEGRANULATION	97	76	478	0.00335376	0.0158091	1.80109	PSMB1:ATP6V0A1:GDI2:PKM:RHOA:ATP11A:RAB7A:XRCC5:HSP90AA1:RAB10:HUWE1:FTL:CMTM6:HSP90AB1:MAPK1:ATP6V1D:PGRMC1:GLA:PSMD7:COTL1:HMOX2:GPI:PDAP1:IMPDH1:PSMD3:KPNB1:PSMD11:RAB5C:HSPA8:MLEC:LTA4H:CAND1:PTPN6:FAF2:ARSB:ACTR1B:PSMD14:RAP1A:RAB14:CYSTM1:PRDX4:RAP2C:UBR4:COPB1:ACLY:DIAPH1:CD63:CAB39:CKAP4:PSMB7:SLC15A4:RHOF:SRP14:PSMA5:ILF2:ARL8A:DYNC1LI1:STOM:PTGES2:ALDOA:NDUFC2:LPCAT1:CCT8:PDXK:PSMC2:NCS…
REACTOME_SUMOYLATION_OF_IMMUNE_RESPONSE_PROTEINS	5	2	11	0.00352114	0.0164943	1.78266	NFKB2:UBE2I:PIAS4:SUMO1:IKBKG
REACTOME_RHO_GTPASES_ACTIVATE_KTN1	5	2	11	0.00352114	0.0164943	1.78266	RHOA:CDC42:KIF5B:KLC2:RHOG
REACTOME_CHREBP_ACTIVATES_METABOLIC_GENE_EXPRESSION	4	2	8	0.00364772	0.0169673	1.77039	MLX:ACLY:FASN:ACACA
REACTOME_WNT_MEDIATED_ACTIVATION_OF_DVL	4	2	8	0.00364772	0.0169673	1.77039	DVL2:CSNK2A2:CSNK2A1:CSNK2B
REACTOME_EPIGENETIC_REGULATION_OF_GENE_EXPRESSION	35	24	146	0.00365607	0.0169673	1.77039	BAZ1B:MNAT1:ZNRD1:MBD3:ACTB:POLR2E:POLR2F:RBBP7:TWISTNB:EZH2:GTF2H1:GTF2H3:TBP:TAF1B:DNMT3A:TTF1:H3F3B:MBD2:CDK7:POLR1E:TAF1A:GTF2H2:POLR2K:MTA2:SAP18:SMARCA5:RBBP4:ERCC3:POLR2H:GATAD2A:POLR2L:SUZ12:MTA1:POLR1D:H2AFX
REACTOME_PYRUVATE_METABOLISM_AND_CITRIC_ACID_TCA_CYCLE	16	9	55	0.00382348	0.0176895	1.75229	CS:ME2:DLD:ACO2:IDH3B:LDHB:SDHB:DLST:PDHA1:LDHA:SUCLA2:DLAT:IDH3A:BSG:SDHD:VDAC1
REACTOME_DISEASES_ASSOCIATED_WITH_GLYCOSYLATION_PRECURSOR_BIOSYNTHESIS	7	3	18	0.00383678	0.0176964	1.75212	DPM1:DHDDS:SRD5A3:DPM2:DOLK:GFPT1:NEU1
REACTOME_TOLL_LIKE_RECEPTOR_TLR1:TLR2_CASCADE	25	16	97	0.00387023	0.0177959	1.74968	CUL1:FBXW11:NFKB2:MAPK1:RIPK2:NFKBIB:PPP2R1A:DUSP3:PPP2CA:MAPKAPK3:ELK1:ECSIT:PPP2R1B:TAB3:MAPKAPK2:DUSP7:NKIRAS2:TNIP2:UBB:MYD88:UBE2N:IRAK1:CHUK:UBA52:IKBKG
REACTOME_SIGNALING_BY_NTRK1_TRKA	21	13	78	0.0038916	0.0178395	1.74862	RHOA:CRKL:MAPK1:PPP2R1A:RAPGEF1:DUSP3:PPP2CA:MAPKAPK3:RAP1A:CLTA:ELK1:PPP2R1B:CLTC:MAPK13:MAPKAPK2:DUSP7:YWHAB:STAT3:HRAS:GRB2:NRAS
[truncated: 1,172 more rows]

## Sheet: Cluster 4
Pathway	observed	expected	pathway_size	p.val	p.adjust	Score	genes
REACTOME_SYNTHESIS_OF_IP3_AND_IP4_IN_THE_CYTOSOL	7	2	26	5.37938e-05	0.0608553	1.2157	PLCG1:PLCB2:ITPKB:SYNJ1:INPP5D:PLCD1:INPP5B
[truncated: 1,498 more rows]

## Sheet: Cluster 5
Pathway	observed	expected	pathway_size	p.val	p.adjust	Score	genes
[truncated: 1,499 more rows]
