# Supplementary material for: Dynamic chromatin architecture identifies new autoimmune-associated enhancers for IL2 and novel genes regulating CD4+ T cell activation
Source: eLife. 2024 Sep 20;13:RP96852. doi: 10.7554/eLife.96852 (PMC11418197; doi:10.7554/eLife.96852)
Supplement: Supplementary file 4. [file elife-96852-supp4.xlsx]

## Sheet: SupTab_03_atac_fpkm
id	chr	start	end	sample	count	fpkm	log2fpkm	condition		Table S4: Accessible chromatin regions
OCR_1	chr1	540831	541071	CD4_unstim_ND517	3	2.43142	1.69684	CD4_unstim
OCR_2	chr1	713678	714740	CD4_unstim_ND517	146	26.8272	4.75547	CD4_unstim
OCR_3	chr1	762217	762411	CD4_unstim_ND517	1	1.00166	1.0024	CD4_unstim
OCR_4	chr1	762596	763258	CD4_unstim_ND517	41	12.0789	3.62918	CD4_unstim
OCR_5	chr1	778048	778357	CD4_unstim_ND517	6	3.78047	2.14096	CD4_unstim
OCR_6	chr1	779714	780280	CD4_unstim_ND517	15	5.16731	2.46252	CD4_unstim
OCR_7	chr1	805001	805636	CD4_unstim_ND517	26	7.98496	3.05173	CD4_unstim
OCR_8	chr1	834128	834421	CD4_unstim_ND517	12	7.97242	3.11049	CD4_unstim
OCR_9	chr1	839418	841098	CD4_unstim_ND517	36	4.18303	2.10408	CD4_unstim
OCR_10	chr1	846599	846838	CD4_unstim_ND517	3	2.44155	1.70284	CD4_unstim
OCR_11	chr1	856527	856758	CD4_unstim_ND517	5	4.20958	2.33671	CD4_unstim
OCR_12	chr1	858720	859623	CD4_unstim_ND517	24	5.1856	2.4334	CD4_unstim
OCR_13	chr1	859924	861306	CD4_unstim_ND517	22	3.10711	1.6997	CD4_unstim
OCR_14	chr1	875621	876080	CD4_unstim_ND517	13	5.52003	2.57159	CD4_unstim
OCR_15	chr1	876616	877443	CD4_unstim_ND517	17	4.01028	2.08617	CD4_unstim
OCR_16	chr1	877767	879274	CD4_unstim_ND517	10	1.29525	0.510738	CD4_unstim
OCR_17	chr1	894407	895441	CD4_unstim_ND517	51	9.62468	3.29475	CD4_unstim
OCR_18	chr1	895800	896798	CD4_unstim_ND517	40	7.82079	3.00294	CD4_unstim
OCR_19	chr1	901444	902760	CD4_unstim_ND517	42	6.22902	2.67295	CD4_unstim
OCR_20	chr1	911236	912092	CD4_unstim_ND517	19	4.33041	2.1885	CD4_unstim
OCR_21	chr1	919427	919862	CD4_unstim_ND517	6	2.68795	1.6489	CD4_unstim
OCR_22	chr1	934297	936425	CD4_unstim_ND517	58	5.32119	2.43641	CD4_unstim
OCR_23	chr1	937137	937506	CD4_unstim_ND517	15	7.91855	3.07835	CD4_unstim
OCR_24	chr1	948258	949490	CD4_unstim_ND517	101	15.9998	4.0142	CD4_unstim
OCR_25	chr1	949731	949960	CD4_unstim_ND517	5	4.24618	2.3492	CD4_unstim
OCR_26	chr1	954532	956368	CD4_unstim_ND517	98	10.4201	3.39595	CD4_unstim
OCR_27	chr1	968201	969671	CD4_unstim_ND517	46	6.10803	2.64173	CD4_unstim
OCR_28	chr1	969799	970052	CD4_unstim_ND517	5	3.84497	2.20601	CD4_unstim
OCR_29	chr1	975003	975230	CD4_unstim_ND517	2	1.71337	1.3618	CD4_unstim
OCR_30	chr1	975368	976416	CD4_unstim_ND517	64	11.9168	3.5973	CD4_unstim
OCR_31	chr1	994263	995513	CD4_unstim_ND517	59	9.21194	3.22775	CD4_unstim
OCR_32	chr1	999077	1000223	CD4_unstim_ND517	35	5.9602	2.616	CD4_unstim
OCR_33	chr1	1003914	1005080	CD4_unstim_ND517	74	12.3856	3.64996	CD4_unstim
OCR_34	chr1	1005275	1005538	CD4_unstim_ND517	2	1.47973	1.1503	CD4_unstim
OCR_35	chr1	1014736	1015931	CD4_unstim_ND517	20	3.26629	1.77804	CD4_unstim
OCR_36	chr1	1034402	1035165	CD4_unstim_ND517	12	3.06792	1.73274	CD4_unstim
OCR_37	chr1	1039638	1039840	CD4_unstim_ND517	7	6.73532	2.94439	CD4_unstim
OCR_38	chr1	1051154	1052433	CD4_unstim_ND517	243	37.0811	5.21854	CD4_unstim
OCR_39	chr1	1057323	1058157	CD4_unstim_ND517	25	5.84803	2.60453	CD4_unstim
OCR_40	chr1	1071843	1072144	CD4_unstim_ND517	5	3.23385	1.95629	CD4_unstim
OCR_41	chr1	1072176	1073506	CD4_unstim_ND517	21	3.08175	1.69086	CD4_unstim
OCR_42	chr1	1079048	1080660	CD4_unstim_ND517	61	7.38672	2.90839	CD4_unstim
OCR_43	chr1	1092742	1094014	CD4_unstim_ND517	38	5.83058	2.58111	CD4_unstim
OCR_44	chr1	1107237	1107750	CD4_unstim_ND517	7	2.66006	1.6041	CD4_unstim
OCR_45	chr1	1108898	1109488	CD4_unstim_ND517	29	9.58444	3.3096	CD4_unstim
OCR_46	chr1	1136106	1137247	CD4_unstim_ND517	60	10.2622	3.38312	CD4_unstim
OCR_47	chr1	1141874	1142265	CD4_unstim_ND517	11	5.48104	2.57998	CD4_unstim
OCR_48	chr1	1143383	1144795	CD4_unstim_ND517	27	3.73231	1.95254	CD4_unstim
OCR_49	chr1	1148218	1148518	CD4_unstim_ND517	8	5.19134	2.54603	CD4_unstim
OCR_50	chr1	1148604	1149718	CD4_unstim_ND517	24	4.20429	2.13076	CD4_unstim
OCR_51	chr1	1150121	1150452	CD4_unstim_ND517	2	1.17665	0.819651	CD4_unstim
OCR_52	chr1	1150532	1150924	CD4_unstim_ND517	3	1.49103	0.991342	CD4_unstim
OCR_53	chr1	1166513	1166985	CD4_unstim_ND517	21	8.6719	3.18346	CD4_unstim
OCR_54	chr1	1167049	1168094	CD4_unstim_ND517	179	33.4255	5.07091	CD4_unstim
OCR_55	chr1	1173503	1173777	CD4_unstim_ND517	2	1.42054	1.0914	CD4_unstim
OCR_56	chr1	1182006	1182199	CD4_unstim_ND517	7	7.04778	3.00981	CD4_unstim
OCR_57	chr1	1185556	1185883	CD4_unstim_ND517	0	0	-0.747824	CD4_unstim
OCR_58	chr1	1185961	1186908	CD4_unstim_ND517	35	7.21134	2.89091	CD4_unstim
OCR_59	chr1	1196646	1196868	CD4_unstim_ND517	7	6.13126	2.80883	CD4_unstim
OCR_60	chr1	1208408	1209895	CD4_unstim_ND517	87	11.4202	3.53	CD4_unstim
OCR_61	chr1	1225613	1225846	CD4_unstim_ND517	5	4.1736	2.32433	CD4_unstim
OCR_62	chr1	1226928	1227562	CD4_unstim_ND517	14	4.30636	2.20601	CD4_unstim
OCR_63	chr1	1235440	1235840	CD4_unstim_ND517	10	4.87093	2.4217	CD4_unstim
OCR_64	chr1	1240749	1240951	CD4_unstim_ND517	37	35.601	5.19232	CD4_unstim
OCR_65	chr1	1240977	1241257	CD4_unstim_ND517	39	27.1091	4.79723	CD4_unstim
OCR_66	chr1	1243150	1244464	CD4_unstim_ND517	222	32.9749	5.04978	CD4_unstim
OCR_67	chr1	1259644	1260819	CD4_unstim_ND517	114	18.9345	4.25555	CD4_unstim
OCR_68	chr1	1268443	1268676	CD4_unstim_ND517	3	2.50416	1.73936	CD4_unstim
OCR_69	chr1	1268944	1269550	CD4_unstim_ND517	5	1.60893	0.949137	CD4_unstim
OCR_70	chr1	1273227	1273413	CD4_unstim_ND517	1	1.04451	1.06283	CD4_unstim
OCR_71	chr1	1284393	1285424	CD4_unstim_ND517	93	17.6019	4.15309	CD4_unstim
OCR_72	chr1	1290104	1291115	CD4_unstim_ND517	11	2.12309	1.2117	CD4_unstim
OCR_73	chr1	1293900	1294078	CD4_unstim_ND517	4	4.36479	2.44784	CD4_unstim
OCR_74	chr1	1294713	1294982	CD4_unstim_ND517	4	2.89369	1.85484	CD4_unstim
OCR_75	chr1	1306640	1307244	CD4_unstim_ND517	123	39.7106	5.32313	CD4_unstim
OCR_76	chr1	1307353	1307732	CD4_unstim_ND517	41	21.0745	4.43219	CD4_unstim
OCR_77	chr1	1310016	1311203	CD4_unstim_ND517	139	22.8536	4.52469	CD4_unstim
OCR_78	chr1	1334042	1335788	CD4_unstim_ND517	240	26.8333	4.75195	CD4_unstim
OCR_79	chr1	1341814	1343445	CD4_unstim_ND517	87	10.4125	3.39673	CD4_unstim
OCR_80	chr1	1355239	1355648	CD4_unstim_ND517	7	3.3348	1.93025	CD4_unstim
OCR_81	chr1	1362062	1362626	CD4_unstim_ND517	7	2.41995	1.46762	CD4_unstim
OCR_82	chr1	1369218	1370179	CD4_unstim_ND517	9	1.82736	1.02176	CD4_unstim
OCR_83	chr1	1370674	1371229	CD4_unstim_ND517	16	5.62084	2.57825	CD4_unstim
OCR_84	chr1	1376196	1376721	CD4_unstim_ND517	10	3.71339	2.03024	CD4_unstim
OCR_85	chr1	1406266	1407891	CD4_unstim_ND517	93	11.1717	3.4972	CD4_unstim
OCR_86	chr1	1440119	1440691	CD4_unstim_ND517	22	7.49936	2.9709	CD4_unstim
OCR_87	chr1	1440786	1441168	CD4_unstim_ND517	6	3.05991	1.83588	CD4_unstim
OCR_88	chr1	1446402	1446551	CD4_unstim_ND517	1	1.30216	1.38091	CD4_unstim
OCR_89	chr1	1446824	1448280	CD4_unstim_ND517	93	12.4675	3.65553	CD4_unstim
OCR_90	chr1	1475413	1476549	CD4_unstim_ND517	30	5.15368	2.41291	CD4_unstim
OCR_91	chr1	1509525	1510881	CD4_unstim_ND517	113	16.265	4.03641	CD4_unstim
OCR_92	chr1	1532705	1533299	CD4_unstim_ND517	8	2.62621	1.56291	CD4_unstim
OCR_93	chr1	1534905	1536037	CD4_unstim_ND517	38	6.55104	2.7492	CD4_unstim
OCR_94	chr1	1542404	1542868	CD4_unstim_ND517	18	7.56094	2.99657	CD4_unstim
OCR_95	chr1	1549700	1550431	CD4_unstim_ND517	54	14.4092	3.87539	CD4_unstim
OCR_96	chr1	1550481	1551731	CD4_unstim_ND517	297	46.372	5.54003	CD4_unstim
OCR_97	chr1	1564189	1566112	CD4_unstim_ND517	286	29.0347	4.86474	CD4_unstim
OCR_98	chr1	1590046	1591052	CD4_unstim_ND517	61	11.832	3.58808	CD4_unstim
OCR_99	chr1	1608870	1610632	CD4_unstim_ND517	49	5.42875	2.46977	CD4_unstim
OCR_100	chr1	1623737	1624988	CD4_unstim_ND517	28	4.36827	2.17769	CD4_unstim
OCR_101	chr1	1655470	1656329	CD4_unstim_ND517	47	10.6747	3.4465	CD4_unstim
OCR_102	chr1	1677449	1678250	CD4_unstim_ND517	33	8.03703	3.04973	CD4_unstim
OCR_103	chr1	1709468	1710925	CD4_unstim_ND517	81	10.8513	3.4575	CD4_unstim
OCR_104	chr1	1711588	1712107	CD4_unstim_ND517	46	17.2787	4.14195	CD4_unstim
OCR_105	chr1	1729498	1729721	CD4_unstim_ND517	2	1.74397	1.38734	CD4_unstim
OCR_106	chr1	1771775	1772020	CD4_unstim_ND517	3	2.382	1.66721	CD4_unstim
OCR_107	chr1	1772095	1772522	CD4_unstim_ND517	1	0.456365	-0.131739	CD4_unstim
OCR_108	chr1	1772955	1773234	CD4_unstim_ND517	0	0	-0.519555	CD4_unstim
OCR_109	chr1	1790166	1790423	CD4_unstim_ND517	6	4.54243	2.40586	CD4_unstim
OCR_110	chr1	1791688	1791896	CD4_unstim_ND517	4	3.73826	2.2243	CD4_unstim
OCR_111	chr1	1821332	1823563	CD4_unstim_ND517	201	17.5897	4.14382	CD4_unstim
OCR_112	chr1	1837770	1837961	CD4_unstim_ND517	11	11.1905	3.60973	CD4_unstim
OCR_113	chr1	1839896	1841309	CD4_unstim_ND517	117	16.1619	4.0268	CD4_unstim
OCR_114	chr1	1850254	1851359	CD4_unstim_ND517	145	25.6076	4.68842	CD4_unstim
OCR_115	chr1	1875315	1875872	CD4_unstim_ND517	17	5.95074	2.65553	CD4_unstim
OCR_116	chr1	1891247	1891803	CD4_unstim_ND517	7	2.4547	1.48819	CD4_unstim
OCR_117	chr1	1950603	1951378	CD4_unstim_ND517	7	1.76195	1.00981	CD4_unstim
OCR_118	chr1	1957085	1957419	CD4_unstim_ND517	8	4.66446	2.39164	CD4_unstim
OCR_119	chr1	1975802	1976798	CD4_unstim_ND517	19	3.72233	1.97021	CD4_unstim
OCR_120	chr1	1981348	1982363	CD4_unstim_ND517	114	21.9163	4.46653	CD4_unstim
OCR_121	chr1	2058263	2058829	CD4_unstim_ND517	9	3.10039	1.78445	CD4_unstim
OCR_122	chr1	2063751	2063960	CD4_unstim_ND517	3	2.79035	1.89548	CD4_unstim
OCR_123	chr1	2064413	2065433	CD4_unstim_ND517	186	35.5831	5.16085	CD4_unstim
OCR_124	chr1	2071236	2071670	CD4_unstim_ND517	8	3.59217	2.01478	CD4_unstim
OCR_125	chr1	2077736	2078434	CD4_unstim_ND517	39	10.8979	3.48251	CD4_unstim
OCR_126	chr1	2080002	2080703	CD4_unstim_ND517	32	8.90367	3.19879	CD4_unstim
OCR_127	chr1	2084360	2084884	CD4_unstim_ND517	18	6.69683	2.82148	CD4_unstim
OCR_128	chr1	2105799	2106191	CD4_unstim_ND517	6	2.98205	1.7987	CD4_unstim
OCR_129	chr1	2120732	2121368	CD4_unstim_ND517	49	15.0249	3.93843	CD4_unstim
OCR_130	chr1	2125790	2127078	CD4_unstim_ND517	183	27.7303	4.80125	CD4_unstim
OCR_131	chr1	2130439	2131240	CD4_unstim_ND517	128	31.174	4.9735	CD4_unstim
OCR_132	chr1	2135942	2137559	CD4_unstim_ND517	90	10.8648	3.45753	CD4_unstim
OCR_133	chr1	2143848	2144818	CD4_unstim_ND517	21	4.22432	2.14583	CD4_unstim
OCR_134	chr1	2158825	2159764	CD4_unstim_ND517	273	56.7272	5.83124	CD4_unstim
OCR_135	chr1	2160660	2160894	CD4_unstim_ND517	35	29.0909	4.90314	CD4_unstim
OCR_136	chr1	2162437	2162794	CD4_unstim_ND517	65	35.4639	5.17031	CD4_unstim
OCR_137	chr1	2163269	2163754	CD4_unstim_ND517	99	39.7883	5.32877	CD4_unstim
OCR_138	chr1	2165783	2166149	CD4_unstim_ND517	106	56.4152	5.83156	CD4_unstim
OCR_139	chr1	2168708	2169033	CD4_unstim_ND517	46	27.5611	4.81559	CD4_unstim
OCR_140	chr1	2171714	2172031	CD4_unstim_ND517	21	12.8988	3.75628	CD4_unstim
OCR_141	chr1	2172095	2172545	CD4_unstim_ND517	24	10.3942	3.4366	CD4_unstim
OCR_142	chr1	2174832	2175054	CD4_unstim_ND517	7	6.13126	2.80883	CD4_unstim
OCR_143	chr1	2177594	2178395	CD4_unstim_ND517	19	4.62738	2.2842	CD4_unstim
OCR_144	chr1	2186805	2187869	CD4_unstim_ND517	308	56.4882	5.82455	CD4_unstim
OCR_145	chr1	2187929	2188315	CD4_unstim_ND517	27	13.6273	3.82089	CD4_unstim
OCR_146	chr1	2190489	2190793	CD4_unstim_ND517	31	19.8526	4.35706	CD4_unstim
OCR_147	chr1	2206638	2206888	CD4_unstim_ND517	2	1.55637	1.22315	CD4_unstim
OCR_148	chr1	2207373	2207811	CD4_unstim_ND517	6	2.66958	1.63901	CD4_unstim
OCR_149	chr1	2219780	2220059	CD4_unstim_ND517	23	16.0445	4.06541	CD4_unstim
OCR_150	chr1	2221568	2222880	CD4_unstim_ND517	85	12.6448	3.67734	CD4_unstim
OCR_151	chr1	2231674	2233003	CD4_unstim_ND517	361	53.0166	5.73236	CD4_unstim
OCR_152	chr1	2242850	2243220	CD4_unstim_ND517	28	14.7415	3.93243	CD4_unstim
OCR_153	chr1	2245795	2247426	CD4_unstim_ND517	66	7.89914	3.00339	CD4_unstim
OCR_154	chr1	2313131	2313789	CD4_unstim_ND517	23	6.81708	2.83056	CD4_unstim
OCR_155	chr1	2314097	2314303	CD4_unstim_ND517	4	3.77438	2.23817	CD4_unstim
OCR_156	chr1	2322484	2323902	CD4_unstim_ND517	202	27.8051	4.8044	CD4_unstim
OCR_157	chr1	2343439	2344872	CD4_unstim_ND517	156	21.2487	4.41852	CD4_unstim
OCR_158	chr1	2345897	2346123	CD4_unstim_ND517	9	7.74413	3.10511	CD4_unstim
OCR_159	chr1	2347244	2347546	CD4_unstim_ND517	12	7.73562	3.06699	CD4_unstim
OCR_160	chr1	2398762	2398961	CD4_unstim_ND517	2	1.95324	1.55083	CD4_unstim
OCR_161	chr1	2399544	2399756	CD4_unstim_ND517	5	4.58508	2.45998	CD4_unstim
OCR_162	chr1	2425259	2425816	CD4_unstim_ND517	20	7.00087	2.87792	CD4_unstim
OCR_163	chr1	2431293	2431674	CD4_unstim_ND517	14	7.15848	2.93919	CD4_unstim
OCR_164	chr1	2437840	2438076	CD4_unstim_ND517	6	4.94492	2.52834	CD4_unstim
OCR_165	chr1	2454768	2455106	CD4_unstim_ND517	28	16.133	4.06257	CD4_unstim
OCR_166	chr1	2455411	2455956	CD4_unstim_ND517	30	10.7321	3.47117	CD4_unstim
OCR_167	chr1	2457390	2458628	CD4_unstim_ND517	156	24.5929	4.62939	CD4_unstim
OCR_168	chr1	2460481	2460707	CD4_unstim_ND517	7	6.02322	2.78318	CD4_unstim
OCR_169	chr1	2460936	2461214	CD4_unstim_ND517	17	11.9015	3.65553	CD4_unstim
OCR_170	chr1	2470853	2471054	CD4_unstim_ND517	6	5.80171	2.75887	CD4_unstim
OCR_171	chr1	2472097	2472590	CD4_unstim_ND517	7	2.76775	1.66136	CD4_unstim
OCR_172	chr1	2474994	2475156	CD4_unstim_ND517	17	20.3712	4.43092	CD4_unstim
OCR_173	chr1	2477481	2478878	CD4_unstim_ND517	214	29.8994	4.90877	CD4_unstim
OCR_174	chr1	2479023	2480011	CD4_unstim_ND517	74	14.6148	3.88872	CD4_unstim
OCR_175	chr1	2480071	2480647	CD4_unstim_ND517	131	44.3457	5.48169	CD4_unstim
OCR_176	chr1	2486365	2486843	CD4_unstim_ND517	23	9.37883	3.29081	CD4_unstim
OCR_177	chr1	2486962	2488800	CD4_unstim_ND517	104	11.0461	3.47927	CD4_unstim
OCR_178	chr1	2493439	2493642	CD4_unstim_ND517	8	7.65978	3.10723	CD4_unstim
OCR_179	chr1	2496668	2496951	CD4_unstim_ND517	1	0.687762	0.45998	CD4_unstim
OCR_180	chr1	2508853	2510180	CD4_unstim_ND517	59	8.67781	3.14158	CD4_unstim
OCR_181	chr1	2510243	2510534	CD4_unstim_ND517	10	6.68919	2.87933	CD4_unstim
OCR_182	chr1	2515623	2515879	CD4_unstim_ND517	20	15.2003	3.99642	CD4_unstim
OCR_183	chr1	2516691	2517506	CD4_unstim_ND517	113	27.0486	4.77019	CD4_unstim
OCR_184	chr1	2517658	2519000	CD4_unstim_ND517	133	19.3434	4.28457	CD4_unstim
OCR_185	chr1	2524198	2524623	CD4_unstim_ND517	5	2.29254	1.45998	CD4_unstim
OCR_186	chr1	2573773	2574968	CD4_unstim_ND517	114	18.6179	4.23122	CD4_unstim
OCR_187	chr1	2687004	2687214	CD4_unstim_ND517	0	0	-0.111372	CD4_unstim
OCR_188	chr1	2688616	2689357	CD4_unstim_ND517	13	3.42212	1.88181	CD4_unstim
OCR_189	chr1	2703261	2703493	CD4_unstim_ND517	9	7.54471	3.06747	CD4_unstim
OCR_190	chr1	2718186	2718463	CD4_unstim_ND517	5	3.51303	2.07575	CD4_unstim
OCR_191	chr1	2738584	2738992	CD4_unstim_ND517	14	6.68592	2.84066	CD4_unstim
OCR_192	chr1	2756485	2757472	CD4_unstim_ND517	44	8.69865	3.15321	CD4_unstim
OCR_193	chr1	2810990	2811732	CD4_unstim_ND517	37	9.72678	3.32044	CD4_unstim
OCR_194	chr1	2838671	2838898	CD4_unstim_ND517	1	0.856685	0.776838	CD4_unstim
OCR_195	chr1	2929094	2929352	CD4_unstim_ND517	5	3.77074	2.17788	CD4_unstim
OCR_196	chr1	2949095	2950204	CD4_unstim_ND517	73	12.8457	3.70284	CD4_unstim
OCR_197	chr1	2985447	2987276	CD4_unstim_ND517	17	1.81449	0.942025	CD4_unstim
OCR_198	chr1	3229542	3230020	CD4_unstim_ND517	2	0.81555	0.290808	CD4_unstim
OCR_199	chr1	3233074	3233523	CD4_unstim_ND517	15	6.51081	2.79595	CD4_unstim
OCR_200	chr1	3236551	3236753	CD4_unstim_ND517	3	2.88657	1.94439	CD4_unstim
OCR_201	chr1	3341356	3341574	CD4_unstim_ND517	9	8.02703	3.15687	CD4_unstim
OCR_202	chr1	3369736	3370225	CD4_unstim_ND517	11	4.38483	2.25805	CD4_unstim
OCR_203	chr1	3370832	3371691	CD4_unstim_ND517	11	2.49833	1.4465	CD4_unstim
OCR_204	chr1	3407676	3408503	CD4_unstim_ND517	25	5.89747	2.61668	CD4_unstim
OCR_205	chr1	3447404	3448739	CD4_unstim_ND517	115	16.8131	4.084	CD4_unstim
OCR_206	chr1	3481870	3482084	CD4_unstim_ND517	8	7.26788	3.03146	CD4_unstim
OCR_207	chr1	3501350	3501874	CD4_unstim_ND517	2	0.744093	0.158516	CD4_unstim
OCR_208	chr1	3513789	3514763	CD4_unstim_ND517	24	4.80798	2.32433	CD4_unstim
OCR_209	chr1	3514846	3515029	CD4_unstim_ND517	4	4.24618	2.40809	CD4_unstim
OCR_210	chr1	3527034	3528725	CD4_unstim_ND517	28	3.23232	1.74319	CD4_unstim
OCR_211	chr1	3535436	3536053	CD4_unstim_ND517	16	5.05694	2.42573	CD4_unstim
OCR_212	chr1	3540885	3542347	CD4_unstim_ND517	204	27.2359	4.77449	CD4_unstim
OCR_213	chr1	3566169	3567072	CD4_unstim_ND517	69	14.9086	3.91883	CD4_unstim
OCR_214	chr1	3568801	3569139	CD4_unstim_ND517	8	4.60942	2.37451	CD4_unstim
OCR_215	chr1	3612224	3612474	CD4_unstim_ND517	5	3.89092	2.22315	CD4_unstim
OCR_216	chr1	3640862	3641268	CD4_unstim_ND517	4	1.91965	1.26277	CD4_unstim
OCR_217	chr1	3663140	3664183	CD4_unstim_ND517	70	13.0965	3.73157	CD4_unstim
OCR_218	chr1	3688264	3689546	CD4_unstim_ND517	112	17.0509	4.1046	CD4_unstim
OCR_219	chr1	3692564	3692786	CD4_unstim_ND517	20	17.5179	4.20115	CD4_unstim
OCR_220	chr1	3712333	3713681	CD4_unstim_ND517	123	17.8094	4.16625	CD4_unstim
OCR_221	chr1	3718111	3718267	CD4_unstim_ND517	3	3.73231	2.31511	CD4_unstim
OCR_222	chr1	3773176	3774616	CD4_unstim_ND517	250	33.8869	5.08842	CD4_unstim
OCR_223	chr1	3816569	3818136	CD4_unstim_ND517	423	52.6927	5.72294	CD4_unstim
OCR_224	chr1	3819089	3819455	CD4_unstim_ND517	50	26.6109	4.76252	CD4_unstim
OCR_225	chr1	3827275	3828199	CD4_unstim_ND517	15	3.16742	1.75642	CD4_unstim
OCR_226	chr1	3838951	3839450	CD4_unstim_ND517	0	0	-1.35606	CD4_unstim
OCR_227	chr1	4087625	4087874	CD4_unstim_ND517	1	0.781297	0.643943	CD4_unstim
OCR_228	chr1	4439648	4439830	CD4_unstim_ND517	0	0	0.0940277	CD4_unstim
OCR_229	chr1	4645345	4645568	CD4_unstim_ND517	4	3.48793	2.1243	CD4_unstim
OCR_230	chr1	4712678	4713634	CD4_unstim_ND517	11	2.24511	1.29231	CD4_unstim
OCR_231	chr1	4714528	4714878	CD4_unstim_ND517	3	1.66944	1.1544	CD4_unstim
OCR_232	chr1	4716395	4716627	CD4_unstim_ND517	4	3.35321	2.06747	CD4_unstim
OCR_233	chr1	4768950	4769259	CD4_unstim_ND517	3	1.89024	1.3336	CD4_unstim
OCR_234	chr1	4770391	4771576	CD4_unstim_ND517	8	1.31753	0.567764	CD4_unstim
OCR_235	chr1	4771643	4771878	CD4_unstim_ND517	1	0.827645	0.727084	CD4_unstim
OCR_236	chr1	4773659	4774033	CD4_unstim_ND517	6	3.12519	1.86634	CD4_unstim
OCR_237	chr1	4796400	4796614	CD4_unstim_ND517	3	2.72546	1.86153	CD4_unstim
OCR_238	chr1	4805635	4805862	CD4_unstim_ND517	0	0	-0.223162	CD4_unstim
OCR_239	chr1	4886208	4886376	CD4_unstim_ND517	0	0	0.208848	CD4_unstim
OCR_240	chr1	5389177	5389698	CD4_unstim_ND517	7	2.61929	1.58182	CD4_unstim
OCR_241	chr1	5448636	5449615	CD4_unstim_ND517	27	5.38138	2.48044	CD4_unstim
OCR_242	chr1	5449830	5450278	CD4_unstim_ND517	1	0.435021	-0.200844	CD4_unstim
OCR_243	chr1	5450626	5450868	CD4_unstim_ND517	2	1.60761	1.26988	CD4_unstim
OCR_244	chr1	5483289	5483551	CD4_unstim_ND517	9	6.6841	2.89274	CD4_unstim
OCR_245	chr1	5541932	5542441	CD4_unstim_ND517	9	3.4469	1.9373	CD4_unstim
OCR_246	chr1	5569829	5570259	CD4_unstim_ND517	11	4.98507	2.44315	CD4_unstim
OCR_247	chr1	5574671	5574922	CD4_unstim_ND517	2	1.55019	1.21741	CD4_unstim
OCR_248	chr1	5805931	5806200	CD4_unstim_ND517	3	2.17027	1.53291	CD4_unstim
OCR_249	chr1	5975932	5976526	CD4_unstim_ND517	4	1.3131	0.71491	CD4_unstim
OCR_250	chr1	6035299	6035510	CD4_unstim_ND517	7	6.44939	2.88181	CD4_unstim
OCR_251	chr1	6051604	6053061	CD4_unstim_ND517	341	45.6828	5.51781	CD4_unstim
OCR_252	chr1	6053123	6053512	CD4_unstim_ND517	35	17.5291	4.17232	CD4_unstim
OCR_253	chr1	6054838	6055068	CD4_unstim_ND517	38	32.1313	5.04338	CD4_unstim
OCR_254	chr1	6066781	6067087	CD4_unstim_ND517	0	0	-0.652367	CD4_unstim
OCR_255	chr1	6067156	6067978	CD4_unstim_ND517	1	0.237332	-1.07502	CD4_unstim
OCR_256	chr1	6085414	6085568	CD4_unstim_ND517	1	1.26016	1.3336	CD4_unstim
OCR_257	chr1	6086047	6087655	CD4_unstim_ND517	175	21.2441	4.41721	CD4_unstim
OCR_258	chr1	6088194	6088717	CD4_unstim_ND517	133	49.5766	5.64239	CD4_unstim
OCR_259	chr1	6094584	6094821	CD4_unstim_ND517	3	2.46207	1.71491	CD4_unstim
OCR_260	chr1	6159824	6160190	CD4_unstim_ND517	5	2.66109	1.67505	CD4_unstim
OCR_261	chr1	6160307	6161792	CD4_unstim_ND517	16	2.10309	1.15997	CD4_unstim
OCR_262	chr1	6161970	6162163	CD4_unstim_ND517	4	4.0273	2.33174	CD4_unstim
OCR_263	chr1	6168972	6169186	CD4_unstim_ND517	3	2.72546	1.86153	CD4_unstim
OCR_264	chr1	6187546	6188450	CD4_unstim_ND517	16	3.45325	1.87542	CD4_unstim
OCR_265	chr1	6201738	6201949	CD4_unstim_ND517	0	0	-0.118193	CD4_unstim
OCR_266	chr1	6208183	6209425	CD4_unstim_ND517	23	3.61421	1.91508	CD4_unstim
OCR_267	chr1	6240963	6241354	CD4_unstim_ND517	7	3.48793	1.99502	CD4_unstim
OCR_268	chr1	6243127	6243328	CD4_unstim_ND517	2	1.9339	1.53648	CD4_unstim
OCR_269	chr1	6243647	6244070	CD4_unstim_ND517	3	1.38201	0.881807	CD4_unstim
OCR_270	chr1	6245778	6246083	CD4_unstim_ND517	3	1.91494	1.35234	CD4_unstim
OCR_271	chr1	6257942	6258157	CD4_unstim_ND517	0	0	-0.14516	CD4_unstim
OCR_272	chr1	6258961	6259970	CD4_unstim_ND517	177	34.2301	5.10532	CD4_unstim
OCR_273	chr1	6260022	6260198	CD4_unstim_ND517	9	9.93174	3.46405	CD4_unstim
OCR_274	chr1	6265294	6265653	CD4_unstim_ND517	9	4.88311	2.4398	CD4_unstim
OCR_275	chr1	6265778	6266714	CD4_unstim_ND517	19	3.96068	2.05975	CD4_unstim
OCR_276	chr1	6268764	6269011	CD4_unstim_ND517	6	4.72559	2.46289	CD4_unstim
OCR_277	chr1	6269188	6269660	CD4_unstim_ND517	9	3.71653	2.04596	CD4_unstim
OCR_278	chr1	6269800	6269988	CD4_unstim_ND517	3	3.10039	2.04749	CD4_unstim
OCR_279	chr1	6295333	6296477	CD4_unstim_ND517	83	14.1589	3.84091	CD4_unstim
OCR_280	chr1	6305140	6305605	CD4_unstim_ND517	17	7.12556	2.91547	CD4_unstim
OCR_281	chr1	6305953	6306307	CD4_unstim_ND517	3	1.65063	1.13805	CD4_unstim
OCR_282	chr1	6306665	6307215	CD4_unstim_ND517	11	3.8994	2.08878	CD4_unstim
OCR_283	chr1	6320006	6321486	CD4_unstim_ND517	52	6.85811	2.80529	CD4_unstim
OCR_284	chr1	6321853	6322014	CD4_unstim_ND517	4	4.82282	2.59181	CD4_unstim
OCR_285	chr1	6403618	6403810	CD4_unstim_ND517	4	4.04817	2.3392	CD4_unstim
OCR_286	chr1	6408054	6409298	CD4_unstim_ND517	62	9.72699	3.30508	CD4_unstim
OCR_287	chr1	6418441	6418622	CD4_unstim_ND517	10	10.7321	3.56136	CD4_unstim
OCR_288	chr1	6418780	6420321	CD4_unstim_ND517	40	5.06678	2.37669	CD4_unstim
OCR_289	chr1	6424972	6425566	CD4_unstim_ND517	34	11.1614	3.52226	CD4_unstim
OCR_290	chr1	6425616	6425770	CD4_unstim_ND517	3	3.78047	2.3336	CD4_unstim
OCR_291	chr1	6453023	6454296	CD4_unstim_ND517	249	38.1756	5.26036	CD4_unstim
OCR_292	chr1	6464782	6465021	CD4_unstim_ND517	4	3.2554	2.02477	CD4_unstim
OCR_293	chr1	6474335	6474922	CD4_unstim_ND517	9	2.98966	1.73198	CD4_unstim
OCR_294	chr1	6479692	6480166	CD4_unstim_ND517	12	4.93451	2.41838	CD4_unstim
OCR_295	chr1	6483552	6485245	CD4_unstim_ND517	48	5.53457	2.49822	CD4_unstim
OCR_296	chr1	6498132	6498593	CD4_unstim_ND517	6	2.53668	1.56533	CD4_unstim
OCR_297	chr1	6500149	6501006	CD4_unstim_ND517	28	6.37422	2.72287	CD4_unstim
OCR_298	chr1	6507825	6508498	CD4_unstim_ND517	30	8.69396	3.16732	CD4_unstim
OCR_299	chr1	6508634	6509600	CD4_unstim_ND517	14	2.82786	1.59925	CD4_unstim
OCR_300	chr1	6514928	6515614	CD4_unstim_ND517	17	4.83335	2.35549	CD4_unstim
OCR_301	chr1	6519566	6521020	CD4_unstim_ND517	247	33.1581	5.05712	CD4_unstim
OCR_302	chr1	6524656	6524842	CD4_unstim_ND517	7	7.3116	3.06283	CD4_unstim
OCR_303	chr1	6525351	6526613	CD4_unstim_ND517	105	16.2384	4.03501	CD4_unstim
OCR_304	chr1	6535445	6536189	CD4_unstim_ND517	20	5.24361	2.46095	CD4_unstim
OCR_305	chr1	6546559	6546839	CD4_unstim_ND517	32	22.2433	4.5197	CD4_unstim
OCR_306	chr1	6549983	6551172	CD4_unstim_ND517	74	12.1462	3.6218	CD4_unstim
OCR_307	chr1	6551711	6551892	CD4_unstim_ND517	2	2.14642	1.6869	CD4_unstim
OCR_308	chr1	6553364	6553614	CD4_unstim_ND517	22	17.1201	4.16175	CD4_unstim
OCR_309	chr1	6555314	6555590	CD4_unstim_ND517	11	7.75656	3.08095	CD4_unstim
OCR_310	chr1	6557074	6558112	CD4_unstim_ND517	53	9.96361	3.34364	CD4_unstim
OCR_311	chr1	6604928	6605230	CD4_unstim_ND517	2	1.28927	0.951516	CD4_unstim
OCR_312	chr1	6605455	6606185	CD4_unstim_ND517	47	12.5585	3.68096	CD4_unstim
OCR_313	chr1	6606389	6606614	CD4_unstim_ND517	4	3.45707	2.11148	CD4_unstim
OCR_314	chr1	6613912	6614999	CD4_unstim_ND517	72	12.9259	3.71209	CD4_unstim
OCR_315	chr1	6639505	6640898	CD4_unstim_ND517	153	21.438	4.4315	CD4_unstim
OCR_316	chr1	6659415	6659639	CD4_unstim_ND517	17	14.7578	3.96587	CD4_unstim
OCR_317	chr1	6659838	6660067	CD4_unstim_ND517	38	32.271	5.04964	CD4_unstim
OCR_318	chr1	6661001	6661908	CD4_unstim_ND517	53	11.4011	3.53807	CD4_unstim
OCR_319	chr1	6662000	6662472	CD4_unstim_ND517	50	20.6474	4.39646	CD4_unstim
OCR_320	chr1	6662524	6664013	CD4_unstim_ND517	234	30.6751	4.94515	CD4_unstim
OCR_321	chr1	6672948	6674965	CD4_unstim_ND517	258	24.9721	4.64783	CD4_unstim
OCR_322	chr1	6684873	6685894	CD4_unstim_ND517	90	17.2008	4.12034	CD4_unstim
OCR_323	chr1	6685952	6686143	CD4_unstim_ND517	6	6.10388	2.83212	CD4_unstim
OCR_324	chr1	6694725	6695059	CD4_unstim_ND517	8	4.66446	2.39164	CD4_unstim
OCR_325	chr1	6706619	6706891	CD4_unstim_ND517	9	6.43926	2.8389	CD4_unstim
OCR_326	chr1	6761209	6762482	CD4_unstim_ND517	88	13.4918	3.77031	CD4_unstim
OCR_327	chr1	6780121	6780373	CD4_unstim_ND517	2	1.54407	1.2117	CD4_unstim
OCR_328	chr1	6787594	6787766	CD4_unstim_ND517	9	10.1614	3.49703	CD4_unstim
OCR_329	chr1	6802046	6802272	CD4_unstim_ND517	17	14.6278	3.9531	CD4_unstim
OCR_330	chr1	6802370	6802536	CD4_unstim_ND517	15	17.5441	4.22602	CD4_unstim
OCR_331	chr1	6802940	6804235	CD4_unstim_ND517	34	5.12425	2.39916	CD4_unstim
OCR_332	chr1	6844339	6846048	CD4_unstim_ND517	516	58.94	5.88397	CD4_unstim
OCR_333	chr1	6950025	6950255	CD4_unstim_ND517	5	4.2278	2.34294	CD4_unstim
OCR_334	chr1	6962301	6962506	CD4_unstim_ND517	2	1.89635	1.50819	CD4_unstim
OCR_335	chr1	7022146	7024300	CD4_unstim_ND517	55	4.98507	2.34361	CD4_unstim
OCR_336	chr1	7028483	7029629	CD4_unstim_ND517	13	2.21379	1.25343	CD4_unstim
OCR_337	chr1	7056482	7056789	CD4_unstim_ND517	9	5.70753	2.66487	CD4_unstim
OCR_338	chr1	7102847	7103071	CD4_unstim_ND517	3	2.60432	1.79595	CD4_unstim
OCR_339	chr1	7130525	7130760	CD4_unstim_ND517	6	4.96587	2.53444	CD4_unstim
OCR_340	chr1	7268053	7268227	CD4_unstim_ND517	2	2.23228	1.74348	CD4_unstim
OCR_341	chr1	7609314	7610173	CD4_unstim_ND517	1	0.227121	-1.13847	CD4_unstim
OCR_342	chr1	7707362	7707638	CD4_unstim_ND517	2	1.41028	1.08095	CD4_unstim
OCR_343	chr1	7727630	7728097	CD4_unstim_ND517	10	4.1736	2.19879	CD4_unstim
OCR_344	chr1	7729431	7730084	CD4_unstim_ND517	19	5.67456	2.57851	CD4_unstim
OCR_345	chr1	7740011	7741402	CD4_unstim_ND517	21	2.9467	1.62622	CD4_unstim
OCR_346	chr1	7763946	7765291	CD4_unstim_ND517	109	15.8175	3.99662	CD4_unstim
OCR_347	chr1	7765389	7765918	CD4_unstim_ND517	18	6.63366	2.80781	CD4_unstim
OCR_348	chr1	7812953	7813204	CD4_unstim_ND517	5	3.87548	2.21741	CD4_unstim
OCR_349	chr1	7830660	7832153	CD4_unstim_ND517	55	7.19065	2.87212	CD4_unstim
OCR_350	chr1	7843507	7844693	CD4_unstim_ND517	220	36.2016	5.18453	CD4_unstim
OCR_351	chr1	7868361	7868609	CD4_unstim_ND517	3	2.3533	1.64973	CD4_unstim
OCR_352	chr1	7887214	7887759	CD4_unstim_ND517	3	1.07321	0.51697	CD4_unstim
OCR_353	chr1	7962533	7963139	CD4_unstim_ND517	4	1.28715	0.686103	CD4_unstim
OCR_354	chr1	7972309	7972674	CD4_unstim_ND517	1	0.533673	0.0940277	CD4_unstim
OCR_355	chr1	7975951	7976242	CD4_unstim_ND517	3	2.00676	1.4199	CD4_unstim
OCR_356	chr1	7976299	7976703	CD4_unstim_ND517	0	0	-1.05205	CD4_unstim
OCR_357	chr1	7980065	7980264	CD4_unstim_ND517	0	0	-0.0341286	CD4_unstim
OCR_358	chr1	7980438	7981193	CD4_unstim_ND517	2	0.516731	-0.367552	CD4_unstim
OCR_359	chr1	7990655	7991791	CD4_unstim_ND517	12	2.06147	1.15915	CD4_unstim
OCR_360	chr1	7999853	8000024	CD4_unstim_ND517	0	0	0.183463	CD4_unstim
OCR_361	chr1	8000445	8001611	CD4_unstim_ND517	5	0.836865	0.0061012	CD4_unstim
OCR_362	chr1	8002300	8002801	CD4_unstim_ND517	13	5.0582	2.44554	CD4_unstim
OCR_363	chr1	8008912	8009515	CD4_unstim_ND517	16	5.17415	2.45879	CD4_unstim
OCR_364	chr1	8013807	8014779	CD4_unstim_ND517	50	10.0372	3.35586	CD4_unstim
OCR_365	chr1	8014849	8015031	CD4_unstim_ND517	2	2.13469	1.67899	CD4_unstim
OCR_366	chr1	8021141	8022527	CD4_unstim_ND517	335	47.1764	5.56429	CD4_unstim
OCR_367	chr1	8035389	8035637	CD4_unstim_ND517	5	3.92217	2.23469	CD4_unstim
OCR_368	chr1	8041736	8042079	CD4_unstim_ND517	5	2.83902	1.76843	CD4_unstim
OCR_369	chr1	8042266	8042828	CD4_unstim_ND517	20	6.9387	2.86505	CD4_unstim
OCR_370	chr1	8075068	8075381	CD4_unstim_ND517	5	3.11026	1.90007	CD4_unstim
OCR_371	chr1	8085434	8086922	CD4_unstim_ND517	53	6.95244	2.82449	CD4_unstim
OCR_372	chr1	8156787	8157149	CD4_unstim_ND517	0	0	-0.894098	CD4_unstim
OCR_373	chr1	8157464	8157803	CD4_unstim_ND517	0	0	-0.799663	CD4_unstim
OCR_374	chr1	8181107	8181709	CD4_unstim_ND517	4	1.29568	0.695641	CD4_unstim
OCR_375	chr1	8182137	8182519	CD4_unstim_ND517	2	1.01997	0.613489	CD4_unstim
OCR_376	chr1	8209867	8210120	CD4_unstim_ND517	25	19.2248	4.32148	CD4_unstim
OCR_377	chr1	8212550	8213784	CD4_unstim_ND517	196	30.9988	4.96148	CD4_unstim
OCR_378	chr1	8227371	8227600	CD4_unstim_ND517	2	1.69847	1.3492	CD4_unstim
OCR_379	chr1	8229634	8230289	CD4_unstim_ND517	37	11.0168	3.5001	CD4_unstim
OCR_380	chr1	8242252	8242927	CD4_unstim_ND517	16	4.62306	2.29631	CD4_unstim
OCR_381	chr1	8277073	8277805	CD4_unstim_ND517	8	2.13178	1.26198	CD4_unstim
OCR_382	chr1	8377712	8378829	CD4_unstim_ND517	48	8.38602	3.09773	CD4_unstim
OCR_383	chr1	8408930	8409504	CD4_unstim_ND517	12	4.07633	2.14275	CD4_unstim
OCR_384	chr1	8411852	8412176	CD4_unstim_ND517	6	3.60599	2.07279	CD4_unstim
OCR_385	chr1	8434887	8435148	CD4_unstim_ND517	0	0	-0.423695	CD4_unstim
OCR_386	chr1	8442661	8443549	CD4_unstim_ND517	18	3.95482	2.06162	CD4_unstim
OCR_387	chr1	8444434	8444998	CD4_unstim_ND517	3	1.03712	0.46762	CD4_unstim
OCR_388	chr1	8450056	8450360	CD4_unstim_ND517	3	1.92122	1.35706	CD4_unstim
OCR_389	chr1	8454677	8456009	CD4_unstim_ND517	28	4.10284	2.08725	CD4_unstim
OCR_390	chr1	8456856	8457490	CD4_unstim_ND517	8	2.46078	1.46904	CD4_unstim
OCR_391	chr1	8457620	8458121	CD4_unstim_ND517	7	2.72365	1.63818	CD4_unstim
OCR_392	chr1	8467814	8468140	CD4_unstim_ND517	7	4.18125	2.25658	CD4_unstim
OCR_393	chr1	8468452	8468701	CD4_unstim_ND517	0	0	-0.356057	CD4_unstim
OCR_394	chr1	8469083	8469690	CD4_unstim_ND517	16	5.14011	2.44926	CD4_unstim
OCR_395	chr1	8478019	8478202	CD4_unstim_ND517	1	1.06155	1.08617	CD4_unstim
OCR_396	chr1	8483399	8484968	CD4_unstim_ND517	140	17.4175	4.13273	CD4_unstim
OCR_397	chr1	8487670	8487839	CD4_unstim_ND517	8	9.19173	3.37026	CD4_unstim
OCR_398	chr1	8490563	8491477	CD4_unstim_ND517	49	10.46	3.41596	CD4_unstim
OCR_399	chr1	8508966	8509762	CD4_unstim_ND517	7	1.71552	0.971292	CD4_unstim
OCR_400	chr1	8521431	8521779	CD4_unstim_ND517	5	2.79834	1.74761	CD4_unstim
OCR_401	chr1	8523114	8523649	CD4_unstim_ND517	14	5.10175	2.45053	CD4_unstim
OCR_402	chr1	8532637	8533425	CD4_unstim_ND517	46	11.3877	3.54043	CD4_unstim
OCR_403	chr1	8555918	8556580	CD4_unstim_ND517	3	0.88382	0.236862	CD4_unstim
OCR_404	chr1	8556637	8556805	CD4_unstim_ND517	3	3.4673	2.20885	CD4_unstim
OCR_405	chr1	8569827	8570900	CD4_unstim_ND517	61	11.0938	3.49515	CD4_unstim
OCR_406	chr1	8571811	8572095	CD4_unstim_ND517	6	4.11209	2.26226	CD4_unstim
OCR_407	chr1	8576930	8577460	CD4_unstim_ND517	14	5.14979	2.46405	CD4_unstim
OCR_408	chr1	8585216	8586382	CD4_unstim_ND517	194	32.4704	5.02847	CD4_unstim
OCR_409	chr1	8593193	8593890	CD4_unstim_ND517	18	5.03702	2.41057	CD4_unstim
OCR_410	chr1	8594051	8594265	CD4_unstim_ND517	0	0	-0.138465	CD4_unstim
OCR_411	chr1	8599828	8600067	CD4_unstim_ND517	3	2.44155	1.70284	CD4_unstim
OCR_412	chr1	8600620	8600995	CD4_unstim_ND517	3	1.55844	1.05514	CD4_unstim
OCR_413	chr1	8612280	8612493	CD4_unstim_ND517	6	5.47638	2.67562	CD4_unstim
OCR_414	chr1	8615337	8615508	CD4_unstim_ND517	0	0	0.183463	CD4_unstim
OCR_415	chr1	8620746	8620951	CD4_unstim_ND517	4	3.7927	2.24516	CD4_unstim
OCR_416	chr1	8621153	8621434	CD4_unstim_ND517	14	9.69695	3.37707	CD4_unstim
OCR_417	chr1	8623630	8623857	CD4_unstim_ND517	0	0	-0.223162	CD4_unstim
OCR_418	chr1	8623946	8624281	CD4_unstim_ND517	1	0.581322	0.21741	CD4_unstim
OCR_419	chr1	8631321	8631479	CD4_unstim_ND517	2	2.45691	1.88181	CD4_unstim
OCR_420	chr1	8650203	8650470	CD4_unstim_ND517	0	0	-0.456362	CD4_unstim
OCR_421	chr1	8650801	8651298	CD4_unstim_ND517	9	3.52996	1.97165	CD4_unstim
OCR_422	chr1	8662629	8662793	CD4_unstim_ND517	3	3.55135	2.24341	CD4_unstim
OCR_423	chr1	8662977	8663204	CD4_unstim_ND517	3	2.57006	1.77684	CD4_unstim
OCR_424	chr1	8663763	8664684	CD4_unstim_ND517	7	1.48294	0.761105	CD4_unstim
OCR_425	chr1	8683746	8684124	CD4_unstim_ND517	4	2.06147	1.3656	CD4_unstim
OCR_426	chr1	8689503	8690207	CD4_unstim_ND517	17	4.70995	2.31817	CD4_unstim
OCR_427	chr1	8690654	8690832	CD4_unstim_ND517	2	2.18239	1.71087	CD4_unstim
OCR_428	chr1	8691989	8692196	CD4_unstim_ND517	2	1.87812	1.49425	CD4_unstim
OCR_429	chr1	8703709	8703919	CD4_unstim_ND517	1	0.925708	0.888628	CD4_unstim
OCR_430	chr1	8707719	8707955	CD4_unstim_ND517	0	0	-0.279016	CD4_unstim
OCR_431	chr1	8709144	8709400	CD4_unstim_ND517	0	0	-0.395897	CD4_unstim
OCR_432	chr1	8711272	8711532	CD4_unstim_ND517	17	12.7223	3.75175	CD4_unstim
OCR_433	chr1	8720535	8720927	CD4_unstim_ND517	5	2.48504	1.5763	CD4_unstim
OCR_434	chr1	8721563	8722387	CD4_unstim_ND517	5	1.18378	0.50644	CD4_unstim
OCR_435	chr1	8724198	8724606	CD4_unstim_ND517	6	2.86539	1.74113	CD4_unstim
OCR_436	chr1	8729763	8730305	CD4_unstim_ND517	6	2.15828	1.33227	CD4_unstim
OCR_437	chr1	8730715	8731038	CD4_unstim_ND517	0	0	-0.730122	CD4_unstim
OCR_438	chr1	8731399	8731664	CD4_unstim_ND517	1	0.734302	0.554445	CD4_unstim
OCR_439	chr1	8739042	8739783	CD4_unstim_ND517	5	1.3162	0.659415	CD4_unstim
OCR_440	chr1	8742124	8742322	CD4_unstim_ND517	0	0	-0.0268971	CD4_unstim
OCR_441	chr1	8761091	8762050	CD4_unstim_ND517	135	27.4675	4.7903	CD4_unstim
OCR_442	chr1	8762271	8762444	CD4_unstim_ND517	3	3.36766	2.16678	CD4_unstim
OCR_443	chr1	8762980	8763775	CD4_unstim_ND517	11	2.6992	1.55807	CD4_unstim
OCR_444	chr1	8772680	8773087	CD4_unstim_ND517	6	2.87242	1.74466	CD4_unstim
OCR_445	chr1	8783764	8783995	CD4_unstim_ND517	1	0.841915	0.751747	CD4_unstim
OCR_446	chr1	8786493	8786825	CD4_unstim_ND517	3	1.75968	1.23035	CD4_unstim
OCR_447	chr1	8801666	8801871	CD4_unstim_ND517	0	0	-0.076773	CD4_unstim
OCR_448	chr1	8812119	8812885	CD4_unstim_ND517	3	0.76398	0.0266448	CD4_unstim
OCR_449	chr1	8876518	8878330	CD4_unstim_ND517	192	20.6852	4.37802	CD4_unstim
OCR_450	chr1	8889495	8890137	CD4_unstim_ND517	15	4.55655	2.28105	CD4_unstim
OCR_451	chr1	8900097	8900325	CD4_unstim_ND517	3	2.55883	1.77052	CD4_unstim
OCR_452	chr1	8908879	8909384	CD4_unstim_ND517	11	4.24618	2.2117	CD4_unstim
OCR_453	chr1	8919389	8919957	CD4_unstim_ND517	10	3.43276	1.91687	CD4_unstim
OCR_454	chr1	8922587	8923016	CD4_unstim_ND517	9	4.08818	2.18346	CD4_unstim
OCR_455	chr1	8933648	8934003	CD4_unstim_ND517	4	2.19465	1.45592	CD4_unstim
OCR_456	chr1	8937950	8939646	CD4_unstim_ND517	315	36.2564	5.18474	CD4_unstim
OCR_457	chr1	8940167	8940358	CD4_unstim_ND517	2	2.03463	1.60973	CD4_unstim
OCR_458	chr1	8959728	8960669	CD4_unstim_ND517	14	2.90291	1.63703	CD4_unstim
OCR_459	chr1	8978168	8978498	CD4_unstim_ND517	18	10.6219	3.48697	CD4_unstim
OCR_460	chr1	8980761	8981107	CD4_unstim_ND517	4	2.25158	1.49286	CD4_unstim
OCR_461	chr1	8985761	8986578	CD4_unstim_ND517	7	1.67148	0.933771	CD4_unstim
OCR_462	chr1	8986752	8988045	CD4_unstim_ND517	39	5.8869	2.59403	CD4_unstim
OCR_463	chr1	8998217	8999078	CD4_unstim_ND517	10	2.26594	1.31762	CD4_unstim
OCR_464	chr1	8999718	9000031	CD4_unstim_ND517	2	1.2441	0.900069	CD4_unstim
OCR_465	chr1	9001941	9002191	CD4_unstim_ND517	1	0.778184	0.638184	CD4_unstim
OCR_466	chr1	9006324	9007685	CD4_unstim_ND517	33	4.73253	2.28568	CD4_unstim
OCR_467	chr1	9016619	9016828	CD4_unstim_ND517	4	3.72046	2.21741	CD4_unstim
OCR_468	chr1	9019250	9019486	CD4_unstim_ND517	0	0	-0.279016	CD4_unstim
OCR_469	chr1	9020360	9020735	CD4_unstim_ND517	2	1.03896	0.640101	CD4_unstim
OCR_470	chr1	9022759	9023364	CD4_unstim_ND517	11	3.54549	1.95152	CD4_unstim
OCR_471	chr1	9029625	9029799	CD4_unstim_ND517	17	18.9744	4.32844	CD4_unstim
OCR_472	chr1	9030015	9030327	CD4_unstim_ND517	29	18.0971	4.2266	CD4_unstim
OCR_473	chr1	9030404	9031505	CD4_unstim_ND517	82	14.5341	3.87886	CD4_unstim
OCR_474	chr1	9043712	9044072	CD4_unstim_ND517	6	3.24639	1.92123	CD4_unstim
OCR_475	chr1	9046701	9047234	CD4_unstim_ND517	13	4.75509	2.35639	CD4_unstim
OCR_476	chr1	9047769	9048397	CD4_unstim_ND517	18	5.58957	2.56074	CD4_unstim
OCR_477	chr1	9064294	9065473	CD4_unstim_ND517	34	5.62799	2.53444	CD4_unstim
OCR_478	chr1	9143402	9143633	CD4_unstim_ND517	12	10.103	3.45219	CD4_unstim
OCR_479	chr1	9170851	9171124	CD4_unstim_ND517	8	5.7029	2.68162	CD4_unstim
OCR_480	chr1	9181861	9182668	CD4_unstim_ND517	23	5.55997	2.53648	CD4_unstim
OCR_481	chr1	9188187	9188349	CD4_unstim_ND517	9	10.7848	3.58293	CD4_unstim
OCR_482	chr1	9188415	9190010	CD4_unstim_ND517	165	20.1933	4.34452	CD4_unstim
OCR_483	chr1	9202337	9202943	CD4_unstim_ND517	14	4.50501	2.27107	CD4_unstim
OCR_484	chr1	9223960	9224272	CD4_unstim_ND517	0	0	-0.680291	CD4_unstim
OCR_485	chr1	9241237	9241841	CD4_unstim_ND517	12	3.8742	2.06938	CD4_unstim
OCR_486	chr1	9242004	9242736	CD4_unstim_ND517	6	1.59883	0.899413	CD4_unstim
OCR_487	chr1	9256362	9256802	CD4_unstim_ND517	8	3.5433	1.99502	CD4_unstim
OCR_488	chr1	9261577	9262233	CD4_unstim_ND517	11	3.27027	1.83494	CD4_unstim
OCR_489	chr1	9262578	9263173	CD4_unstim_ND517	5	1.63863	0.975522	CD4_unstim
OCR_490	chr1	9263645	9263971	CD4_unstim_ND517	13	7.76519	3.06394	CD4_unstim
OCR_491	chr1	9294114	9295365	CD4_unstim_ND517	101	15.757	3.99213	CD4_unstim
OCR_492	chr1	9299797	9300444	CD4_unstim_ND517	18	5.42567	2.51781	CD4_unstim
OCR_493	chr1	9327018	9327470	CD4_unstim_ND517	17	7.33005	2.95629	CD4_unstim
OCR_494	chr1	9335456	9336063	CD4_unstim_ND517	3	0.963771	0.3618	CD4_unstim
OCR_495	chr1	9339273	9339583	CD4_unstim_ND517	10	6.28052	2.78839	CD4_unstim
OCR_496	chr1	9340301	9341006	CD4_unstim_ND517	10	2.76663	1.60563	CD4_unstim
OCR_497	chr1	9349153	9349355	CD4_unstim_ND517	7	6.73532	2.94439	CD4_unstim
OCR_498	chr1	9349789	9350341	CD4_unstim_ND517	8	2.82567	1.66852	CD4_unstim
OCR_499	chr1	9352573	9354105	CD4_unstim_ND517	72	9.17374	3.21741	CD4_unstim
OCR_500	chr1	9354377	9354821	CD4_unstim_ND517	6	2.63359	1.61942	CD4_unstim
OCR_501	chr1	9375344	9376509	CD4_unstim_ND517	8	1.34013	0.5923	CD4_unstim
OCR_502	chr1	9428506	9428674	CD4_unstim_ND517	8	9.24612	3.37877	CD4_unstim
OCR_503	chr1	9460030	9460290	CD4_unstim_ND517	6	4.49021	2.38918	CD4_unstim
OCR_504	chr1	9460344	9460957	CD4_unstim_ND517	33	10.4979	3.4351	CD4_unstim
OCR_505	chr1	9473044	9474081	CD4_unstim_ND517	15	2.82261	1.59014	CD4_unstim
OCR_506	chr1	9477844	9478180	CD4_unstim_ND517	10	5.79597	2.67255	CD4_unstim
OCR_507	chr1	9486358	9487018	CD4_unstim_ND517	154	45.5067	5.51735	CD4_unstim
OCR_508	chr1	9488523	9489456	CD4_unstim_ND517	154	32.2055	5.01857	CD4_unstim
OCR_509	chr1	9515893	9516145	CD4_unstim_ND517	2	1.54407	1.2117	CD4_unstim
OCR_510	chr1	9551164	9551412	CD4_unstim_ND517	5	3.92217	2.23469	CD4_unstim
OCR_511	chr1	9555019	9555940	CD4_unstim_ND517	15	3.17773	1.7611	CD4_unstim
OCR_512	chr1	9599084	9600392	CD4_unstim_ND517	161	24.0238	4.59533	CD4_unstim
OCR_513	chr1	9606769	9607001	CD4_unstim_ND517	3	2.5149	1.74554	CD4_unstim
OCR_514	chr1	9618715	9619026	CD4_unstim_ND517	10	6.26039	2.78376	CD4_unstim
OCR_515	chr1	9619511	9620105	CD4_unstim_ND517	16	5.25242	2.48044	CD4_unstim
OCR_516	chr1	9621609	9621804	CD4_unstim_ND517	1	0.996552	0.995018	CD4_unstim
OCR_517	chr1	9648375	9649850	CD4_unstim_ND517	114	15.086	3.92774	CD4_unstim
OCR_518	chr1	9675544	9675960	CD4_unstim_ND517	13	6.08925	2.71318	CD4_unstim
OCR_519	chr1	9687065	9687744	CD4_unstim_ND517	73	20.9686	4.40979	CD4_unstim
OCR_520	chr1	9688598	9688894	CD4_unstim_ND517	8	5.26126	2.56533	CD4_unstim
OCR_521	chr1	9689009	9690197	CD4_unstim_ND517	141	23.1629	4.54394	CD4_unstim
OCR_522	chr1	9690463	9690819	CD4_unstim_ND517	19	10.3954	3.45188	CD4_unstim
OCR_523	chr1	9699341	9699562	CD4_unstim_ND517	6	5.27903	2.62267	CD4_unstim
OCR_524	chr1	9703636	9704336	CD4_unstim_ND517	10	2.78637	1.61589	CD4_unstim
OCR_525	chr1	9704602	9705037	CD4_unstim_ND517	7	3.13594	1.84154	CD4_unstim
OCR_526	chr1	9711566	9713037	CD4_unstim_ND517	110	14.5962	3.88058	CD4_unstim
OCR_527	chr1	9713336	9714822	CD4_unstim_ND517	49	6.43638	2.71539	CD4_unstim
OCR_528	chr1	9715019	9715622	CD4_unstim_ND517	17	5.49754	2.54125	CD4_unstim
OCR_529	chr1	9717810	9717965	CD4_unstim_ND517	3	3.75624	2.32433	CD4_unstim
OCR_530	chr1	9730201	9730532	CD4_unstim_ND517	0	0	-0.765312	CD4_unstim
OCR_531	chr1	9731333	9731786	CD4_unstim_ND517	4	1.72092	1.10511	CD4_unstim
OCR_532	chr1	9731838	9732096	CD4_unstim_ND517	3	2.26244	1.59292	CD4_unstim
OCR_533	chr1	9746785	9746983	CD4_unstim_ND517	4	3.92612	2.29503	CD4_unstim
OCR_534	chr1	9747200	9747876	CD4_unstim_ND517	43	12.4061	3.66615	CD4_unstim
OCR_535	chr1	9749161	9749944	CD4_unstim_ND517	76	18.9345	4.2618	CD4_unstim
OCR_536	chr1	9750047	9750254	CD4_unstim_ND517	10	9.39059	3.36872	CD4_unstim
OCR_537	chr1	9751196	9751425	CD4_unstim_ND517	6	5.09542	2.57159	CD4_unstim
OCR_538	chr1	9762364	9762600	CD4_unstim_ND517	4	3.29661	2.04291	CD4_unstim
OCR_539	chr1	9764871	9765117	CD4_unstim_ND517	4	3.16315	1.98329	CD4_unstim
OCR_540	chr1	9774332	9774932	CD4_unstim_ND517	10	3.24999	1.83794	CD4_unstim
OCR_541	chr1	9775579	9775842	CD4_unstim_ND517	46	34.0338	5.11992	CD4_unstim
OCR_542	chr1	9776537	9776811	CD4_unstim_ND517	14	9.94378	3.41333	CD4_unstim
OCR_543	chr1	9777075	9778192	CD4_unstim_ND517	197	34.4176	5.11238	CD4_unstim
OCR_544	chr1	9779271	9779445	CD4_unstim_ND517	3	3.34842	2.15852	CD4_unstim
OCR_545	chr1	9781703	9782092	CD4_unstim_ND517	29	14.5241	3.90929	CD4_unstim
OCR_546	chr1	9785162	9785375	CD4_unstim_ND517	16	14.6037	3.95572	CD4_unstim
OCR_547	chr1	9788170	9789503	CD4_unstim_ND517	155	22.6951	4.51359	CD4_unstim
OCR_548	chr1	9833749	9834002	CD4_unstim_ND517	0	0	-0.378957	CD4_unstim
OCR_549	chr1	9844560	9844890	CD4_unstim_ND517	5	2.95052	1.824	CD4_unstim
OCR_550	chr1	9847275	9847677	CD4_unstim_ND517	14	6.78546	2.86198	CD4_unstim
OCR_551	chr1	9847765	9848347	CD4_unstim_ND517	39	13.0663	3.7443	CD4_unstim
OCR_552	chr1	9858133	9858633	CD4_unstim_ND517	2	0.779738	0.226023	CD4_unstim
OCR_553	chr1	9859874	9860465	CD4_unstim_ND517	2	0.659879	-0.0147633	CD4_unstim
OCR_554	chr1	9867640	9867852	CD4_unstim_ND517	3	2.75105	1.87502	CD4_unstim
OCR_555	chr1	9882930	9883594	CD4_unstim_ND517	20	5.87441	2.62483	CD4_unstim
OCR_556	chr1	9883652	9884810	CD4_unstim_ND517	83	13.9878	3.82338	CD4_unstim
OCR_557	chr1	9885509	9885978	CD4_unstim_ND517	24	9.97401	3.37707	CD4_unstim
OCR_558	chr1	9909895	9911223	CD4_unstim_ND517	33	4.85004	2.32106	CD4_unstim
OCR_559	chr1	9918756	9919010	CD4_unstim_ND517	1	0.765978	0.615374	CD4_unstim
OCR_560	chr1	9927421	9927866	CD4_unstim_ND517	14	6.13126	2.71572	CD4_unstim
OCR_561	chr1	9934971	9935361	CD4_unstim_ND517	12	5.99461	2.69914	CD4_unstim
OCR_562	chr1	9960397	9960998	CD4_unstim_ND517	12	3.89351	2.07655	CD4_unstim
OCR_563	chr1	9963857	9964247	CD4_unstim_ND517	0	0	-1.0013	CD4_unstim
OCR_564	chr1	9969677	9969921	CD4_unstim_ND517	32	25.5117	4.71748	CD4_unstim
OCR_565	chr1	9970020	9971369	CD4_unstim_ND517	600	86.8108	6.44221	CD4_unstim
OCR_566	chr1	10002459	10003700	CD4_unstim_ND517	50	7.8633	3.0037	CD4_unstim
OCR_567	chr1	10010263	10010885	CD4_unstim_ND517	30	9.40566	3.28084	CD4_unstim
OCR_568	chr1	10056822	10058307	CD4_unstim_ND517	24	3.15463	1.71637	CD4_unstim
OCR_569	chr1	10092491	10093850	CD4_unstim_ND517	252	36.1924	5.18333	CD4_unstim
OCR_570	chr1	10134147	10134751	CD4_unstim_ND517	2	0.6457	-0.0461013	CD4_unstim
OCR_571	chr1	10213128	10213286	CD4_unstim_ND517	1	1.22845	1.29684	CD4_unstim
OCR_572	chr1	10230049	10230816	CD4_unstim_ND517	7	1.7803	1.02477	CD4_unstim
OCR_573	chr1	10269799	10271325	CD4_unstim_ND517	168	21.4895	4.43412	CD4_unstim
OCR_574	chr1	10276293	10276482	CD4_unstim_ND517	0	0	0.0398719	CD4_unstim
OCR_575	chr1	10341100	10341405	CD4_unstim_ND517	1	0.638315	0.35234	CD4_unstim
OCR_576	chr1	10343378	10343736	CD4_unstim_ND517	0	0	-0.878112	CD4_unstim
OCR_577	chr1	10368048	10368333	CD4_unstim_ND517	12	8.19542	3.1503	CD4_unstim
OCR_578	chr1	10447917	10448611	CD4_unstim_ND517	7	1.96729	1.16886	CD4_unstim
OCR_579	chr1	10458267	10459726	CD4_unstim_ND517	242	32.3757	5.02279	CD4_unstim
OCR_580	chr1	10475223	10475802	CD4_unstim_ND517	6	2.0206	1.23717	CD4_unstim
OCR_581	chr1	10488161	10488400	CD4_unstim_ND517	10	8.13851	3.16227	CD4_unstim
OCR_582	chr1	10489930	10491430	CD4_unstim_ND517	89	11.5815	3.54987	CD4_unstim
OCR_583	chr1	10517624	10517869	CD4_unstim_ND517	1	0.794001	0.667213	CD4_unstim
OCR_584	chr1	10531983	10532997	CD4_unstim_ND517	109	20.9757	4.40382	CD4_unstim
OCR_585	chr1	10534811	10535688	CD4_unstim_ND517	84	18.6871	4.24104	CD4_unstim
OCR_586	chr1	10554596	10555039	CD4_unstim_ND517	35	15.3972	3.98524	CD4_unstim
OCR_587	chr1	10555156	10555712	CD4_unstim_ND517	54	18.9363	4.26955	CD4_unstim
OCR_588	chr1	10556014	10556468	CD4_unstim_ND517	26	11.1614	3.53489	CD4_unstim
OCR_589	chr1	10567475	10567766	CD4_unstim_ND517	13	8.69594	3.22726	CD4_unstim
OCR_590	chr1	10570608	10571720	CD4_unstim_ND517	54	9.47665	3.27085	CD4_unstim
OCR_591	chr1	10585276	10585506	CD4_unstim_ND517	8	6.76448	2.9279	CD4_unstim
OCR_592	chr1	10604364	10604588	CD4_unstim_ND517	10	8.68108	3.25538	CD4_unstim
OCR_593	chr1	10622124	10622383	CD4_unstim_ND517	2	1.50249	1.17232	CD4_unstim
OCR_594	chr1	10698327	10698618	CD4_unstim_ND517	10	6.68919	2.87933	CD4_unstim
OCR_595	chr1	10698668	10699314	CD4_unstim_ND517	12	3.62271	1.97255	CD4_unstim
OCR_596	chr1	10704667	10704871	CD4_unstim_ND517	2	1.9056	1.51521	CD4_unstim
OCR_597	chr1	10752489	10752742	CD4_unstim_ND517	13	9.99691	3.4284	CD4_unstim
OCR_598	chr1	10753591	10755376	CD4_unstim_ND517	99	10.827	3.45107	CD4_unstim
OCR_599	chr1	10791063	10791391	CD4_unstim_ND517	0	0	-0.752216	CD4_unstim
OCR_600	chr1	10793819	10794341	CD4_unstim_ND517	2	0.746938	0.164023	CD4_unstim
OCR_601	chr1	10815860	10816489	CD4_unstim_ND517	30	9.30116	3.26472	CD4_unstim
OCR_602	chr1	10853245	10853468	CD4_unstim_ND517	3	2.61595	1.80237	CD4_unstim
OCR_603	chr1	10863962	10864444	CD4_unstim_ND517	2	0.808796	0.278811	CD4_unstim
OCR_604	chr1	10926442	10927701	CD4_unstim_ND517	24	3.72046	1.95438	CD4_unstim
OCR_605	chr1	10963835	10964259	CD4_unstim_ND517	8	3.67669	2.04833	CD4_unstim
OCR_606	chr1	10964664	10965444	CD4_unstim_ND517	31	7.75295	3.00055	CD4_unstim
OCR_607	chr1	10965964	10966169	CD4_unstim_ND517	2	1.89635	1.50819	CD4_unstim
OCR_608	chr1	10970009	10970374	CD4_unstim_ND517	15	8.00509	3.09403	CD4_unstim
OCR_609	chr1	10977890	10978545	CD4_unstim_ND517	25	7.44376	2.95262	CD4_unstim
OCR_610	chr1	10992120	10992530	CD4_unstim_ND517	4	1.90097	1.24866	CD4_unstim
OCR_611	chr1	10999756	11000783	CD4_unstim_ND517	13	2.47005	1.41146	CD4_unstim
OCR_612	chr1	11000846	11001147	CD4_unstim_ND517	1	0.646769	0.371323	CD4_unstim
OCR_613	chr1	11002100	11002319	CD4_unstim_ND517	5	4.43919	2.41333	CD4_unstim
OCR_614	chr1	11020937	11021421	CD4_unstim_ND517	11	4.43004	2.27285	CD4_unstim
OCR_615	chr1	11025089	11025299	CD4_unstim_ND517	3	2.77712	1.88863	CD4_unstim
OCR_616	chr1	11025586	11026304	CD4_unstim_ND517	14	3.80325	2.02677	CD4_unstim
OCR_617	chr1	11071850	11072055	CD4_unstim_ND517	10	9.48176	3.38266	CD4_unstim
OCR_618	chr1	11072109	11073576	CD4_unstim_ND517	159	21.1557	4.41202	CD4_unstim
OCR_619	chr1	11097688	11098193	CD4_unstim_ND517	27	10.4224	3.43409	CD4_unstim
OCR_620	chr1	11112179	11114413	CD4_unstim_ND517	11	0.961328	0.0686309	CD4_unstim
OCR_621	chr1	11119511	11120601	CD4_unstim_ND517	193	34.5532	5.11821	CD4_unstim
OCR_622	chr1	11120653	11120865	CD4_unstim_ND517	16	14.6722	3.96248	CD4_unstim
OCR_623	chr1	11120950	11121218	CD4_unstim_ND517	13	9.43946	3.34562	CD4_unstim
OCR_624	chr1	11159210	11160298	CD4_unstim_ND517	59	10.5823	3.42783	CD4_unstim
OCR_625	chr1	11301775	11302068	CD4_unstim_ND517	3	1.9931	1.41006	CD4_unstim
OCR_626	chr1	11322061	11323043	CD4_unstim_ND517	175	34.7729	5.12811	CD4_unstim
OCR_627	chr1	11332676	11334185	CD4_unstim_ND517	108	13.9702	3.81758	CD4_unstim
OCR_628	chr1	11339838	11340024	CD4_unstim_ND517	1	1.04451	1.06283	CD4_unstim
OCR_629	chr1	11340855	11341556	CD4_unstim_ND517	38	10.5731	3.4398	CD4_unstim
OCR_630	chr1	11344813	11345207	CD4_unstim_ND517	6	2.96695	1.79137	CD4_unstim
OCR_631	chr1	11351655	11351826	CD4_unstim_ND517	3	3.40682	2.18346	CD4_unstim
OCR_632	chr1	11355023	11355316	CD4_unstim_ND517	6	3.98621	2.21741	CD4_unstim
OCR_633	chr1	11356046	11356222	CD4_unstim_ND517	6	6.62116	2.94948	CD4_unstim
OCR_634	chr1	11380331	11380530	CD4_unstim_ND517	1	0.976621	0.965871	CD4_unstim
OCR_635	chr1	11397601	11397866	CD4_unstim_ND517	14	10.2802	3.46134	CD4_unstim
OCR_636	chr1	11412991	11413177	CD4_unstim_ND517	7	7.3116	3.06283	CD4_unstim
OCR_637	chr1	11443590	11444919	CD4_unstim_ND517	31	4.55267	2.23252	CD4_unstim
OCR_638	chr1	11467336	11467719	CD4_unstim_ND517	8	4.06926	2.19469	CD4_unstim
OCR_639	chr1	11517028	11517361	CD4_unstim_ND517	14	8.18725	3.13291	CD4_unstim
OCR_640	chr1	11538738	11539611	CD4_unstim_ND517	49	10.9507	3.48209	CD4_unstim
OCR_641	chr1	11540201	11540444	CD4_unstim_ND517	8	6.40408	2.84892	CD4_unstim
OCR_642	chr1	11561535	11561918	CD4_unstim_ND517	12	6.10388	2.7252	CD4_unstim
OCR_643	chr1	11702236	11702794	CD4_unstim_ND517	16	5.59068	2.57049	CD4_unstim
OCR_644	chr1	11705803	11706046	CD4_unstim_ND517	5	4.00255	2.26395	CD4_unstim
OCR_645	chr1	11708916	11709357	CD4_unstim_ND517	10	4.4191	2.28126	CD4_unstim
OCR_646	chr1	11710437	11710777	CD4_unstim_ND517	32	18.3296	4.24049	CD4_unstim
OCR_647	chr1	11714166	11715553	CD4_unstim_ND517	76	10.695	3.43772	CD4_unstim
OCR_648	chr1	11723934	11725229	CD4_unstim_ND517	76	11.4542	3.53666	CD4_unstim
OCR_649	chr1	11740401	11741997	CD4_unstim_ND517	160	19.5691	4.2995	CD4_unstim
OCR_650	chr1	11751347	11751956	CD4_unstim_ND517	10	3.20204	1.81649	CD4_unstim
OCR_651	chr1	11753030	11753464	CD4_unstim_ND517	9	4.04119	2.16678	CD4_unstim
OCR_652	chr1	11771258	11771462	CD4_unstim_ND517	3	2.8584	1.93025	CD4_unstim
OCR_653	chr1	11779160	11780139	CD4_unstim_ND517	101	20.1304	4.34551	CD4_unstim
OCR_654	chr1	11790105	11790334	CD4_unstim_ND517	8	6.79389	2.93416	CD4_unstim
OCR_655	chr1	11790429	11790890	CD4_unstim_ND517	23	9.72394	3.34294	CD4_unstim
OCR_656	chr1	11791603	11792118	CD4_unstim_ND517	7	2.64975	1.5985	CD4_unstim
OCR_657	chr1	11795837	11796330	CD4_unstim_ND517	25	9.88483	3.3618	CD4_unstim
OCR_658	chr1	11796409	11797318	CD4_unstim_ND517	33	7.08319	2.86747	CD4_unstim
OCR_659	chr1	11809019	11809542	CD4_unstim_ND517	8	2.98205	1.74623	CD4_unstim
OCR_660	chr1	11822092	11822321	CD4_unstim_ND517	8	6.79389	2.93416	CD4_unstim
OCR_661	chr1	11845004	11845656	CD4_unstim_ND517	4	1.19647	0.580716	CD4_unstim
OCR_662	chr1	11863160	11863421	CD4_unstim_ND517	29	21.6199	4.4832	CD4_unstim
OCR_663	chr1	11863530	11863896	CD4_unstim_ND517	66	35.1264	5.15618	CD4_unstim
OCR_664	chr1	11864890	11865185	CD4_unstim_ND517	5	3.2994	1.98524	CD4_unstim
OCR_665	chr1	11865457	11866610	CD4_unstim_ND517	239	40.4528	5.34419	CD4_unstim
OCR_666	chr1	11898685	11899033	CD4_unstim_ND517	8	4.47735	2.33257	CD4_unstim
OCR_667	chr1	11919395	11919614	CD4_unstim_ND517	6	5.32703	2.63572	CD4_unstim
OCR_668	chr1	11925686	11925845	CD4_unstim_ND517	5	6.10388	2.87276	CD4_unstim
OCR_669	chr1	11954044	11954306	CD4_unstim_ND517	7	5.19875	2.57081	CD4_unstim
OCR_670	chr1	11965719	11965982	CD4_unstim_ND517	22	16.277	4.0889	CD4_unstim
OCR_671	chr1	11967774	11968040	CD4_unstim_ND517	69	50.4771	5.67831	CD4_unstim
OCR_672	chr1	11968128	11969376	CD4_unstim_ND517	171	26.7418	4.74943	CD4_unstim
OCR_673	chr1	11969429	11970030	CD4_unstim_ND517	46	14.9251	3.9307	CD4_unstim
OCR_674	chr1	11985597	11986872	CD4_unstim_ND517	58	8.87838	3.17496	CD4_unstim
OCR_675	chr1	11994179	11995204	CD4_unstim_ND517	63	11.9936	3.60691	CD4_unstim
OCR_676	chr1	12039897	12040976	CD4_unstim_ND517	168	30.3838	4.93379	CD4_unstim
OCR_677	chr1	12079022	12080580	CD4_unstim_ND517	171	21.4243	4.42959	CD4_unstim
OCR_678	chr1	12107097	12108148	CD4_unstim_ND517	9	1.67103	0.892737	CD4_unstim
OCR_679	chr1	12117587	12117808	CD4_unstim_ND517	2	1.75968	1.40027	CD4_unstim
OCR_680	chr1	12119747	12119952	CD4_unstim_ND517	2	1.89635	1.50819	CD4_unstim
OCR_681	chr1	12123054	12124176	CD4_unstim_ND517	14	2.43503	1.38348	CD4_unstim
OCR_682	chr1	12127976	12128336	CD4_unstim_ND517	4	2.16426	1.4358	CD4_unstim
OCR_683	chr1	12147541	12149186	CD4_unstim_ND517	45	5.33997	2.44854	CD4_unstim
OCR_684	chr1	12178710	12178906	CD4_unstim_ND517	5	4.95747	2.57264	CD4_unstim
OCR_685	chr1	12181336	12181591	CD4_unstim_ND517	6	4.57791	2.41708	CD4_unstim
OCR_686	chr1	12184905	12185350	CD4_unstim_ND517	6	2.62768	1.61618	CD4_unstim
OCR_687	chr1	12186376	12186719	CD4_unstim_ND517	2	1.13561	0.768425	CD4_unstim
OCR_688	chr1	12187069	12187252	CD4_unstim_ND517	1	1.06155	1.08617	CD4_unstim
OCR_689	chr1	12187364	12188043	CD4_unstim_ND517	1	0.287242	-0.799663	CD4_unstim
OCR_690	chr1	12192790	12193531	CD4_unstim_ND517	28	7.37073	2.93243	CD4_unstim
OCR_691	chr1	12203299	12203458	CD4_unstim_ND517	2	2.44155	1.87276	CD4_unstim
OCR_692	chr1	12203557	12204347	CD4_unstim_ND517	9	2.2224	1.30412	CD4_unstim
OCR_693	chr1	12210400	12211244	CD4_unstim_ND517	61	14.1003	3.84112	CD4_unstim
OCR_694	chr1	12212118	12212536	CD4_unstim_ND517	8	3.72934	2.06885	CD4_unstim
OCR_695	chr1	12217407	12217744	CD4_unstim_ND517	4	2.31153	1.53078	CD4_unstim
OCR_696	chr1	12217902	12218264	CD4_unstim_ND517	2	1.07617	0.690864	CD4_unstim
OCR_697	chr1	12219928	12220159	CD4_unstim_ND517	8	6.73532	2.92167	CD4_unstim
OCR_698	chr1	12221778	12222423	CD4_unstim_ND517	24	7.25663	2.91819	CD4_unstim
OCR_699	chr1	12226741	12228118	CD4_unstim_ND517	60	8.50469	3.1121	CD4_unstim
OCR_700	chr1	12233701	12234208	CD4_unstim_ND517	170	65.3644	6.0389	CD4_unstim
OCR_701	chr1	12237833	12238908	CD4_unstim_ND517	205	37.2133	5.22477	CD4_unstim
OCR_702	chr1	12239021	12239565	CD4_unstim_ND517	152	54.4758	5.777	CD4_unstim
OCR_703	chr1	12248669	12248877	CD4_unstim_ND517	0	0	-0.0976316	CD4_unstim
OCR_704	chr1	12259099	12259324	CD4_unstim_ND517	2	1.72853	1.37451	CD4_unstim
OCR_705	chr1	12263521	12264583	CD4_unstim_ND517	15	2.75622	1.5558	CD4_unstim
OCR_706	chr1	12268825	12269216	CD4_unstim_ND517	14	6.97587	2.90191	CD4_unstim
OCR_707	chr1	12269849	12270040	CD4_unstim_ND517	6	6.10388	2.83212	CD4_unstim
OCR_708	chr1	12270371	12271068	CD4_unstim_ND517	37	10.3539	3.41057	CD4_unstim
OCR_709	chr1	12289695	12290833	CD4_unstim_ND517	93	15.9483	4.01076	CD4_unstim
OCR_710	chr1	12290904	12291104	CD4_unstim_ND517	4	3.88705	2.2806	CD4_unstim
OCR_711	chr1	12332200	12332421	CD4_unstim_ND517	4	3.51936	2.13724	CD4_unstim
OCR_712	chr1	12356622	12357061	CD4_unstim_ND517	1	0.443919	-0.171632	CD4_unstim
OCR_713	chr1	12357905	12358133	CD4_unstim_ND517	1	0.852944	0.770524	CD4_unstim
OCR_714	chr1	12399993	12400170	CD4_unstim_ND517	1	1.09733	1.13399	CD4_unstim
OCR_715	chr1	12404692	12406224	CD4_unstim_ND517	34	4.33205	2.15687	CD4_unstim
OCR_716	chr1	12444982	12445507	CD4_unstim_ND517	9	3.34205	1.89274	CD4_unstim
OCR_717	chr1	12446041	12446716	CD4_unstim_ND517	13	3.75624	2.0162	CD4_unstim
OCR_718	chr1	12457989	12458183	CD4_unstim_ND517	2	2.00333	1.58736	CD4_unstim
OCR_719	chr1	12467508	12467987	CD4_unstim_ND517	6	2.44155	1.51019	CD4_unstim
OCR_720	chr1	12474474	12475609	CD4_unstim_ND517	4	0.687762	-0.218091	CD4_unstim
OCR_721	chr1	12476130	12476489	CD4_unstim_ND517	2	1.08513	0.702837	CD4_unstim
OCR_722	chr1	12477411	12477832	CD4_unstim_ND517	18	8.33137	3.13656	CD4_unstim
OCR_723	chr1	12484396	12484603	CD4_unstim_ND517	1	0.939059	0.909288	CD4_unstim
OCR_724	chr1	12493862	12494044	CD4_unstim_ND517	3	3.20204	2.09403	CD4_unstim
OCR_725	chr1	12494179	12494845	CD4_unstim_ND517	17	4.97828	2.39811	CD4_unstim
OCR_726	chr1	12495670	12496135	CD4_unstim_ND517	11	4.61066	2.3305	CD4_unstim
OCR_727	chr1	12497119	12497337	CD4_unstim_ND517	1	0.891892	0.83494	CD4_unstim
OCR_728	chr1	12498489	12498940	CD4_unstim_ND517	15	6.482	2.78955	CD4_unstim
OCR_729	chr1	12508917	12509144	CD4_unstim_ND517	7	5.9968	2.77684	CD4_unstim
OCR_730	chr1	12509276	12510156	CD4_unstim_ND517	63	13.9676	3.82673	CD4_unstim
OCR_731	chr1	12510339	12510717	CD4_unstim_ND517	19	9.79198	3.3656	CD4_unstim
OCR_732	chr1	12513421	12513898	CD4_unstim_ND517	22	8.98982	3.23242	CD4_unstim
OCR_733	chr1	12518649	12518940	CD4_unstim_ND517	13	8.69594	3.22726	CD4_unstim
OCR_734	chr1	12527611	12528075	CD4_unstim_ND517	1	0.420052	-0.251359	CD4_unstim
OCR_735	chr1	12532808	12533757	CD4_unstim_ND517	53	10.897	3.47283	CD4_unstim
OCR_736	chr1	12536056	12536226	CD4_unstim_ND517	8	9.13798	3.3618	CD4_unstim
OCR_737	chr1	12538114	12538382	CD4_unstim_ND517	7	5.08279	2.53827	CD4_unstim
OCR_738	chr1	12538456	12539120	CD4_unstim_ND517	19	5.58069	2.55445	CD4_unstim
OCR_739	chr1	12540270	12540429	CD4_unstim_ND517	2	2.44155	1.87276	CD4_unstim
OCR_740	chr1	12540851	12541477	CD4_unstim_ND517	11	3.42674	1.90237	CD4_unstim
OCR_741	chr1	12555853	12556112	CD4_unstim_ND517	5	3.75624	2.17232	CD4_unstim
OCR_742	chr1	12556265	12556760	CD4_unstim_ND517	10	3.93799	2.11496	CD4_unstim
OCR_743	chr1	12570291	12571524	CD4_unstim_ND517	144	22.7931	4.52051	CD4_unstim
OCR_744	chr1	12576928	12577150	CD4_unstim_ND517	1	0.875894	0.808828	CD4_unstim
OCR_745	chr1	12578977	12580031	CD4_unstim_ND517	4	0.740566	-0.111372	CD4_unstim
OCR_746	chr1	12609859	12610088	CD4_unstim_ND517	1	0.849236	0.764237	CD4_unstim
OCR_747	chr1	12625929	12626573	CD4_unstim_ND517	3	0.908485	0.276572	CD4_unstim
OCR_748	chr1	12632183	12632349	CD4_unstim_ND517	0	0	0.226023	CD4_unstim
OCR_749	chr1	12632518	12633027	CD4_unstim_ND517	4	1.53196	0.937302	CD4_unstim
OCR_750	chr1	12648286	12648762	CD4_unstim_ND517	1	0.409485	-0.288118	CD4_unstim
OCR_751	chr1	12655082	12656331	CD4_unstim_ND517	34	5.31282	2.4513	CD4_unstim
OCR_752	chr1	12656602	12656802	CD4_unstim_ND517	3	2.91529	1.95868	CD4_unstim
OCR_753	chr1	12661370	12661563	CD4_unstim_ND517	15	15.1024	4.00981	CD4_unstim
OCR_754	chr1	12664173	12664807	CD4_unstim_ND517	55	16.9179	4.10647	CD4_unstim
OCR_755	chr1	12665081	12665377	CD4_unstim_ND517	2	1.31532	0.980371	CD4_unstim
OCR_756	chr1	12676491	12676858	CD4_unstim_ND517	21	11.1462	3.5456	CD4_unstim
OCR_757	chr1	12677514	12677836	CD4_unstim_ND517	21	12.6991	3.73377	CD4_unstim
OCR_758	chr1	12677895	12678691	CD4_unstim_ND517	77	18.8707	4.25669	CD4_unstim
OCR_759	chr1	12678804	12679564	CD4_unstim_ND517	30	7.70004	2.99217	CD4_unstim
OCR_760	chr1	12679907	12680158	CD4_unstim_ND517	18	13.9517	3.88038	CD4_unstim
OCR_761	chr1	12719066	12719302	CD4_unstim_ND517	7	5.76907	2.72098	CD4_unstim
OCR_762	chr1	13820607	13820815	CD4_unstim_ND517	2	1.86913	1.48733	CD4_unstim
OCR_763	chr1	13825125	13825366	CD4_unstim_ND517	9	7.26413	3.01279	CD4_unstim
OCR_764	chr1	13840446	13840657	CD4_unstim_ND517	4	3.68536	2.20374	CD4_unstim
OCR_765	chr1	13856905	13857380	CD4_unstim_ND517	2	0.82069	0.299872	CD4_unstim
OCR_766	chr1	13897041	13897233	CD4_unstim_ND517	1	1.01204	1.01727	CD4_unstim
OCR_767	chr1	13992041	13992507	CD4_unstim_ND517	11	4.60079	2.32741	CD4_unstim
OCR_768	chr1	14026053	14027668	CD4_unstim_ND517	88	10.6365	3.42725	CD4_unstim
OCR_769	chr1	14029329	14029608	CD4_unstim_ND517	18	12.5566	3.72837	CD4_unstim
OCR_770	chr1	14032886	14033225	CD4_unstim_ND517	3	1.72345	1.20034	CD4_unstim
OCR_771	chr1	14049575	14049792	CD4_unstim_ND517	2	1.79197	1.42651	CD4_unstim
OCR_772	chr1	14050361	14050560	CD4_unstim_ND517	7	6.83635	2.96587	CD4_unstim
OCR_773	chr1	14052215	14052654	CD4_unstim_ND517	15	6.65878	2.82837	CD4_unstim
OCR_774	chr1	14056879	14057976	CD4_unstim_ND517	229	40.737	5.35456	CD4_unstim
OCR_775	chr1	14059592	14059819	CD4_unstim_ND517	24	20.5605	4.42069	CD4_unstim
OCR_776	chr1	14063943	14064256	CD4_unstim_ND517	1	0.622052	0.315107	CD4_unstim
OCR_777	chr1	14075256	14076651	CD4_unstim_ND517	282	39.4566	5.3073	CD4_unstim
OCR_778	chr1	14083531	14083708	CD4_unstim_ND517	1	1.09733	1.13399	CD4_unstim
OCR_779	chr1	14083810	14084065	CD4_unstim_ND517	2	1.52597	1.19469	CD4_unstim
OCR_780	chr1	14084321	14084507	CD4_unstim_ND517	3	3.13354	2.06283	CD4_unstim
OCR_781	chr1	14084737	14085074	CD4_unstim_ND517	2	1.15577	0.793811	CD4_unstim
OCR_782	chr1	14092590	14092815	CD4_unstim_ND517	0	0	-0.210451	CD4_unstim
OCR_783	chr1	14093480	14093994	CD4_unstim_ND517	1	0.37927	-0.398701	CD4_unstim
OCR_784	chr1	14117200	14117484	CD4_unstim_ND517	8	5.48279	2.62483	CD4_unstim
OCR_785	chr1	14119853	14120176	CD4_unstim_ND517	1	0.602853	0.269878	CD4_unstim
OCR_786	chr1	14121130	14121735	CD4_unstim_ND517	3	0.966952	0.366554	CD4_unstim
OCR_787	chr1	14137763	14138016	CD4_unstim_ND517	7	5.38295	2.62104	CD4_unstim
OCR_788	chr1	14140181	14140433	CD4_unstim_ND517	3	2.3161	1.62673	CD4_unstim
OCR_789	chr1	14155398	14155615	CD4_unstim_ND517	10	8.95983	3.30097	CD4_unstim
OCR_790	chr1	14286779	14287189	CD4_unstim_ND517	6	2.85145	1.73409	CD4_unstim
OCR_791	chr1	14330117	14330353	CD4_unstim_ND517	1	0.824153	0.720984	CD4_unstim
OCR_792	chr1	14647095	14647424	CD4_unstim_ND517	6	3.55135	2.05076	CD4_unstim
OCR_793	chr1	14659193	14659673	CD4_unstim_ND517	14	5.68511	2.60673	CD4_unstim
OCR_794	chr1	14661092	14661719	CD4_unstim_ND517	7	2.17718	1.31511	CD4_unstim
OCR_795	chr1	14926345	14926700	CD4_unstim_ND517	0	0	-0.866006	CD4_unstim
OCR_796	chr1	15241911	15242160	CD4_unstim_ND517	2	1.56259	1.22891	CD4_unstim
OCR_797	chr1	15250248	15251711	CD4_unstim_ND517	28	3.73571	1.95201	CD4_unstim
OCR_798	chr1	15295526	15296028	CD4_unstim_ND517	28	10.8729	3.49329	CD4_unstim
OCR_799	chr1	15296741	15296936	CD4_unstim_ND517	2	1.9931	1.57998	CD4_unstim
OCR_800	chr1	15364750	15364933	CD4_unstim_ND517	2	2.12309	1.67113	CD4_unstim
OCR_801	chr1	15373100	15373312	CD4_unstim_ND517	2	1.83403	1.45998	CD4_unstim
OCR_802	chr1	15426778	15427191	CD4_unstim_ND517	4	1.88719	1.23817	CD4_unstim
OCR_803	chr1	15438800	15439069	CD4_unstim_ND517	2	1.44685	1.11787	CD4_unstim
OCR_804	chr1	15455061	15455340	CD4_unstim_ND517	7	4.88311	2.48044	CD4_unstim
OCR_805	chr1	15478900	15479106	CD4_unstim_ND517	0	0	-0.0837594	CD4_unstim
OCR_806	chr1	15479163	15479407	CD4_unstim_ND517	1	0.797242	0.67309	CD4_unstim
OCR_807	chr1	15479495	15480349	CD4_unstim_ND517	3	0.685348	-0.130053	CD4_unstim
OCR_808	chr1	15480399	15480821	CD4_unstim_ND517	3	1.38528	0.885214	CD4_unstim
OCR_809	chr1	15482813	15483167	CD4_unstim_ND517	0	0	-0.861948	CD4_unstim
OCR_810	chr1	15557960	15558672	CD4_unstim_ND517	6	1.64368	0.939324	CD4_unstim
OCR_811	chr1	15570001	15570483	CD4_unstim_ND517	0	0	-1.30615	CD4_unstim
OCR_812	chr1	15573525	15574121	CD4_unstim_ND517	9	2.94459	1.71007	CD4_unstim
OCR_813	chr1	15575514	15576003	CD4_unstim_ND517	9	3.58759	1.99502	CD4_unstim
OCR_814	chr1	15579471	15579787	CD4_unstim_ND517	3	1.84849	1.30139	CD4_unstim
OCR_815	chr1	15587617	15588249	CD4_unstim_ND517	4	1.23428	0.625594	CD4_unstim
OCR_816	chr1	15599069	15599323	CD4_unstim_ND517	3	2.29793	1.61537	CD4_unstim
OCR_817	chr1	15616994	15617211	CD4_unstim_ND517	0	0	-0.158457	CD4_unstim
OCR_818	chr1	15631283	15631510	CD4_unstim_ND517	5	4.28343	2.3618	CD4_unstim
OCR_819	chr1	15638527	15638751	CD4_unstim_ND517	0	0	-0.204054	CD4_unstim
OCR_820	chr1	15650032	15650341	CD4_unstim_ND517	8	5.04063	2.50353	CD4_unstim
OCR_821	chr1	15666967	15667191	CD4_unstim_ND517	4	3.47243	2.11787	CD4_unstim
OCR_822	chr1	15672422	15672729	CD4_unstim_ND517	5	3.17085	1.9279	CD4_unstim
OCR_823	chr1	15679010	15679580	CD4_unstim_ND517	3	1.02622	0.452381	CD4_unstim
OCR_824	chr1	15710944	15711155	CD4_unstim_ND517	2	1.84268	1.46677	CD4_unstim
OCR_825	chr1	15735714	15737245	CD4_unstim_ND517	147	18.742	4.23798	CD4_unstim
OCR_826	chr1	15743506	15744615	CD4_unstim_ND517	23	4.04726	2.07835	CD4_unstim
OCR_827	chr1	15757390	15758105	CD4_unstim_ND517	8	2.18239	1.29584	CD4_unstim
OCR_828	chr1	15850533	15851983	CD4_unstim_ND517	450	60.5761	5.92388	CD4_unstim
OCR_829	chr1	15852921	15853772	CD4_unstim_ND517	130	29.803	4.90844	CD4_unstim
OCR_830	chr1	15904213	15904919	CD4_unstim_ND517	15	4.14408	2.14416	CD4_unstim
OCR_831	chr1	15905367	15906421	CD4_unstim_ND517	76	14.0708	3.83349	CD4_unstim
OCR_832	chr1	15910892	15911884	CD4_unstim_ND517	49	9.63836	3.29793	CD4_unstim
OCR_833	chr1	15921667	15921853	CD4_unstim_ND517	1	1.04451	1.06283	CD4_unstim
OCR_834	chr1	15929486	15930542	CD4_unstim_ND517	78	14.4137	3.86775	CD4_unstim
OCR_835	chr1	15943010	15943285	CD4_unstim_ND517	5	3.53848	2.08617	CD4_unstim
OCR_836	chr1	15943337	15945270	CD4_unstim_ND517	115	11.6144	3.55034	CD4_unstim
OCR_837	chr1	16010551	16011830	CD4_unstim_ND517	62	9.46102	3.26508	CD4_unstim
OCR_838	chr1	16023125	16024100	CD4_unstim_ND517	62	12.4079	3.65627	CD4_unstim
OCR_839	chr1	16067727	16068345	CD4_unstim_ND517	15	4.73322	2.33593	CD4_unstim
OCR_840	chr1	16082786	16083274	CD4_unstim_ND517	13	5.19267	2.48339	CD4_unstim
OCR_841	chr1	16084602	16086051	CD4_unstim_ND517	31	4.1759	2.10789	CD4_unstim
OCR_842	chr1	16118555	16118838	CD4_unstim_ND517	3	2.06328	1.45998	CD4_unstim
OCR_843	chr1	16125621	16125831	CD4_unstim_ND517	1	0.925708	0.888628	CD4_unstim
OCR_844	chr1	16142052	16142347	CD4_unstim_ND517	5	3.2994	1.98524	CD4_unstim
OCR_845	chr1	16159912	16160093	CD4_unstim_ND517	20	21.4642	4.49425	CD4_unstim
OCR_846	chr1	16160771	16162872	CD4_unstim_ND517	271	25.1822	4.65964	CD4_unstim
OCR_847	chr1	16173578	16175418	CD4_unstim_ND517	191	20.2645	4.34842	CD4_unstim
OCR_848	chr1	16175835	16176110	CD4_unstim_ND517	15	10.6155	3.5012	CD4_unstim
OCR_849	chr1	16176325	16176804	CD4_unstim_ND517	10	4.06926	2.16227	CD4_unstim
OCR_850	chr1	16212689	16213292	CD4_unstim_ND517	14	4.52738	2.27821	CD4_unstim
OCR_851	chr1	16224378	16224592	CD4_unstim_ND517	1	0.908485	0.861535	CD4_unstim
OCR_852	chr1	16230975	16231281	CD4_unstim_ND517	1	0.636235	0.347633	CD4_unstim
OCR_853	chr1	16242533	16242788	CD4_unstim_ND517	1	0.762986	0.609728	CD4_unstim
OCR_854	chr1	16242971	16243208	CD4_unstim_ND517	3	2.46207	1.71491	CD4_unstim
OCR_855	chr1	16245825	16246326	CD4_unstim_ND517	0	0	-1.36182	CD4_unstim
OCR_856	chr1	16275737	16276696	CD4_unstim_ND517	29	5.90042	2.60973	CD4_unstim
OCR_857	chr1	16276824	16277201	CD4_unstim_ND517	6	3.10039	1.85484	CD4_unstim
OCR_858	chr1	16277297	16277753	CD4_unstim_ND517	4	1.70962	1.09561	CD4_unstim
OCR_859	chr1	16277798	16278098	CD4_unstim_ND517	0	0	-0.623892	CD4_unstim
OCR_860	chr1	16282651	16283002	CD4_unstim_ND517	1	0.554899	0.150296	CD4_unstim
OCR_861	chr1	16286100	16286708	CD4_unstim_ND517	1	0.32073	-0.640571	CD4_unstim
OCR_862	chr1	16290595	16290877	CD4_unstim_ND517	3	2.07058	1.46507	CD4_unstim
OCR_863	chr1	16291728	16292133	CD4_unstim_ND517	3	1.44328	0.944392	CD4_unstim
OCR_864	chr1	16292327	16293213	CD4_unstim_ND517	16	3.52332	1.9044	CD4_unstim
OCR_865	chr1	16301440	16301791	CD4_unstim_ND517	6	3.32939	1.95765	CD4_unstim
OCR_866	chr1	16301838	16302806	CD4_unstim_ND517	95	19.1494	4.27434	CD4_unstim
OCR_867	chr1	16321069	16321275	CD4_unstim_ND517	2	1.88719	1.5012	CD4_unstim
OCR_868	chr1	16333607	16333955	CD4_unstim_ND517	5	2.79834	1.74761	CD4_unstim
OCR_869	chr1	16339214	16340239	CD4_unstim_ND517	15	2.85562	1.60691	CD4_unstim
OCR_870	chr1	16353178	16353563	CD4_unstim_ND517	11	5.56624	2.60223	CD4_unstim
OCR_871	chr1	16359372	16359634	CD4_unstim_ND517	2	1.48536	1.15577	CD4_unstim
OCR_872	chr1	16375006	16375459	CD4_unstim_ND517	4	1.72092	1.10511	CD4_unstim
OCR_873	chr1	16382229	16383048	CD4_unstim_ND517	22	5.24041	2.45381	CD4_unstim
OCR_874	chr1	16399569	16400669	CD4_unstim_ND517	26	4.61256	2.26002	CD4_unstim
OCR_875	chr1	16405422	16406108	CD4_unstim_ND517	16	4.54904	2.27302	CD4_unstim
OCR_876	chr1	16408906	16409112	CD4_unstim_ND517	5	4.71798	2.5012	CD4_unstim
OCR_877	chr1	16449475	16449733	CD4_unstim_ND517	3	2.26244	1.59292	CD4_unstim
OCR_878	chr1	16466115	16466316	CD4_unstim_ND517	4	3.86781	2.27344	CD4_unstim
OCR_879	chr1	16481055	16481803	CD4_unstim_ND517	11	2.86858	1.64587	CD4_unstim
OCR_880	chr1	16481854	16482926	CD4_unstim_ND517	12	2.18443	1.24273	CD4_unstim
OCR_881	chr1	16484453	16484927	CD4_unstim_ND517	49	20.1492	4.3618	CD4_unstim
OCR_882	chr1	16488232	16489215	CD4_unstim_ND517	55	10.9175	3.47457	CD4_unstim
OCR_883	chr1	16493931	16494787	CD4_unstim_ND517	48	10.94	3.48129	CD4_unstim
OCR_884	chr1	16514178	16514593	CD4_unstim_ND517	14	6.57341	2.81618	CD4_unstim
OCR_885	chr1	16532727	16533848	CD4_unstim_ND517	289	50.3108	5.65778	CD4_unstim
OCR_886	chr1	16542741	16544398	CD4_unstim_ND517	102	12.0163	3.601	CD4_unstim
OCR_887	chr1	16562682	16564050	CD4_unstim_ND517	103	14.6957	3.89126	CD4_unstim
OCR_888	chr1	16570758	16571220	CD4_unstim_ND517	10	4.21867	2.21429	CD4_unstim
OCR_889	chr1	16575697	16575934	CD4_unstim_ND517	3	2.46207	1.71491	CD4_unstim
OCR_890	chr1	16678370	16679693	CD4_unstim_ND517	132	19.4734	4.29432	CD4_unstim
OCR_891	chr1	16693387	16694549	CD4_unstim_ND517	262	44.0025	5.46501	CD4_unstim
OCR_892	chr1	16694694	16694869	CD4_unstim_ND517	19	21.0861	4.47222	CD4_unstim
OCR_893	chr1	16712638	16713146	CD4_unstim_ND517	4	1.53496	0.940134	CD4_unstim
OCR_894	chr1	16713268	16714247	CD4_unstim_ND517	14	2.79035	1.57998	CD4_unstim
OCR_895	chr1	16745568	16745784	CD4_unstim_ND517	1	0.900112	0.848176	CD4_unstim
OCR_896	chr1	16746919	16747992	CD4_unstim_ND517	50	9.09331	3.21337	CD4_unstim
OCR_897	chr1	16766698	16768225	CD4_unstim_ND517	108	13.8056	3.80048	CD4_unstim
OCR_898	chr1	16825167	16826593	CD4_unstim_ND517	72	9.85518	3.32078	CD4_unstim
OCR_899	chr1	16860841	16861229	CD4_unstim_ND517	8	4.01695	2.17603	CD4_unstim
OCR_900	chr1	16861442	16861699	CD4_unstim_ND517	5	3.78535	2.18346	CD4_unstim
OCR_901	chr1	16918307	16918557	CD4_unstim_ND517	4	3.11274	1.96011	CD4_unstim
OCR_902	chr1	16928782	16929391	CD4_unstim_ND517	2	0.640408	-0.0579754	CD4_unstim
OCR_903	chr1	16939104	16940539	CD4_unstim_ND517	95	12.9219	3.70685	CD4_unstim
OCR_904	chr1	16947329	16947852	CD4_unstim_ND517	15	5.59134	2.5763	CD4_unstim
OCR_905	chr1	16951466	16951709	CD4_unstim_ND517	15	12.0076	3.67899	CD4_unstim
OCR_906	chr1	16970419	16970662	CD4_unstim_ND517	7	5.60357	2.67899	CD4_unstim
OCR_907	chr1	16970743	16971732	CD4_unstim_ND517	92	18.1513	4.1976	CD4_unstim
OCR_908	chr1	17003342	17003677	CD4_unstim_ND517	3	1.74397	1.21741	CD4_unstim
OCR_909	chr1	17004207	17004975	CD4_unstim_ND517	6	1.52399	0.830243	CD4_unstim
OCR_910	chr1	17019793	17020134	CD4_unstim_ND517	4	2.28449	1.5138	CD4_unstim
OCR_911	chr1	17025944	17026558	CD4_unstim_ND517	7	2.2232	1.34528	CD4_unstim
OCR_912	chr1	17026627	17028160	CD4_unstim_ND517	77	9.80441	3.31205	CD4_unstim
OCR_913	chr1	17029751	17029913	CD4_unstim_ND517	10	11.9831	3.72043	CD4_unstim
OCR_914	chr1	17033901	17034737	CD4_unstim_ND517	24	5.6007	2.5445	CD4_unstim
OCR_915	chr1	17036133	17036595	CD4_unstim_ND517	20	8.43733	3.14718	CD4_unstim
OCR_916	chr1	17199914	17200297	CD4_unstim_ND517	2	1.01731	0.609728	CD4_unstim
OCR_917	chr1	17215379	17216524	CD4_unstim_ND517	15	2.5566	1.44734	CD4_unstim
OCR_918	chr1	17222070	17223663	CD4_unstim_ND517	65	7.96492	3.01569	CD4_unstim
OCR_919	chr1	17230233	17231003	CD4_unstim_ND517	46	11.6536	3.57373	CD4_unstim
OCR_920	chr1	17231065	17232223	CD4_unstim_ND517	249	41.9635	5.39685	CD4_unstim
OCR_921	chr1	17240127	17241242	CD4_unstim_ND517	205	35.8795	5.17211	CD4_unstim
OCR_922	chr1	17248052	17248819	CD4_unstim_ND517	26	6.61254	2.77965	CD4_unstim
OCR_923	chr1	17278062	17278509	CD4_unstim_ND517	9	3.92393	2.1243	CD4_unstim
OCR_924	chr1	17287041	17287982	CD4_unstim_ND517	11	2.28086	1.31511	CD4_unstim
OCR_925	chr1	17307020	17307471	CD4_unstim_ND517	9	3.8892	2.11148	CD4_unstim
OCR_926	chr1	17337748	17338813	CD4_unstim_ND517	121	22.171	4.48247	CD4_unstim
OCR_927	chr1	17380171	17381275	CD4_unstim_ND517	145	25.6308	4.68972	CD4_unstim
OCR_928	chr1	17386218	17386441	CD4_unstim_ND517	3	2.61595	1.80237	CD4_unstim
OCR_929	chr1	17445716	17446345	CD4_unstim_ND517	25	7.75096	3.01096	CD4_unstim
OCR_930	chr1	17452291	17452584	CD4_unstim_ND517	7	4.65058	2.41006	CD4_unstim
OCR_931	chr1	17507688	17508094	CD4_unstim_ND517	5	2.39956	1.52581	CD4_unstim
OCR_932	chr1	17508258	17508861	CD4_unstim_ND517	23	7.43785	2.95629	CD4_unstim
OCR_933	chr1	17512606	17513466	CD4_unstim_ND517	15	3.40286	1.85986	CD4_unstim
OCR_934	chr1	17513533	17513807	CD4_unstim_ND517	9	6.39243	2.82837	CD4_unstim
OCR_935	chr1	17527714	17528741	CD4_unstim_ND517	22	4.18009	2.12766	CD4_unstim
OCR_936	chr1	17534182	17534956	CD4_unstim_ND517	8	2.01625	1.1816	CD4_unstim
OCR_937	chr1	17539160	17539636	CD4_unstim_ND517	18	7.37073	2.95981	CD4_unstim
OCR_938	chr1	17539708	17539989	CD4_unstim_ND517	5	3.4632	2.05514	CD4_unstim
OCR_939	chr1	17563422	17563845	CD4_unstim_ND517	4	1.84268	1.20374	CD4_unstim
OCR_940	chr1	17662659	17663081	CD4_unstim_ND517	8	3.69408	2.05514	CD4_unstim
OCR_941	chr1	17682425	17683588	CD4_unstim_ND517	15	2.51707	1.42485	CD4_unstim
OCR_942	chr1	17732226	17733133	CD4_unstim_ND517	6	1.29069	0.590534	CD4_unstim
OCR_943	chr1	17746217	17746784	CD4_unstim_ND517	8	2.75105	1.62991	CD4_unstim
OCR_944	chr1	17764037	17765614	CD4_unstim_ND517	54	6.6841	2.76721	CD4_unstim
OCR_945	chr1	17765738	17765892	CD4_unstim_ND517	8	10.0813	3.50353	CD4_unstim
OCR_946	chr1	17766059	17766655	CD4_unstim_ND517	70	22.9023	4.53789	CD4_unstim
OCR_947	chr1	17803916	17804092	CD4_unstim_ND517	4	4.41411	2.46405	CD4_unstim
OCR_948	chr1	17814412	17814610	CD4_unstim_ND517	2	1.96306	1.55807	CD4_unstim
OCR_949	chr1	17820650	17821216	CD4_unstim_ND517	2	0.688975	0.0474851	CD4_unstim
OCR_950	chr1	17828863	17829094	CD4_unstim_ND517	1	0.841915	0.751747	CD4_unstim
OCR_951	chr1	17866092	17866445	CD4_unstim_ND517	2	1.10353	0.727084	CD4_unstim
OCR_952	chr1	18285146	18285316	CD4_unstim_ND517	3	3.42674	2.19188	CD4_unstim
OCR_953	chr1	18396186	18396736	CD4_unstim_ND517	12	4.25389	2.20426	CD4_unstim
OCR_954	chr1	18427127	18427295	CD4_unstim_ND517	2	2.31153	1.79381	CD4_unstim
OCR_955	chr1	18436794	18436994	CD4_unstim_ND517	4	3.88705	2.2806	CD4_unstim
OCR_956	chr1	18437560	18437856	CD4_unstim_ND517	4	2.63063	1.71734	CD4_unstim
OCR_957	chr1	18626300	18626491	CD4_unstim_ND517	3	3.05194	2.02477	CD4_unstim
OCR_958	chr1	18779197	18779348	CD4_unstim_ND517	2	2.57006	1.94676	CD4_unstim
OCR_959	chr1	18884144	18884599	CD4_unstim_ND517	4	1.71337	1.09877	CD4_unstim
OCR_960	chr1	18907999	18908199	CD4_unstim_ND517	7	6.80234	2.95868	CD4_unstim
OCR_961	chr1	18923963	18924161	CD4_unstim_ND517	3	2.94459	1.9731	CD4_unstim
OCR_962	chr1	18945128	18945352	CD4_unstim_ND517	1	0.868108	0.795946	CD4_unstim
OCR_963	chr1	18969747	18970437	CD4_unstim_ND517	10	2.82669	1.63662	CD4_unstim
OCR_964	chr1	18971559	18972188	CD4_unstim_ND517	16	4.96062	2.39798	CD4_unstim
OCR_965	chr1	18973152	18973503	CD4_unstim_ND517	5	2.77449	1.73526	CD4_unstim
OCR_966	chr1	18978043	18978608	CD4_unstim_ND517	33	11.3882	3.55253	CD4_unstim
OCR_967	chr1	18979288	18979567	CD4_unstim_ND517	5	3.48793	2.06541	CD4_unstim
OCR_968	chr1	18979863	18980259	CD4_unstim_ND517	8	3.93601	2.14666	CD4_unstim
OCR_969	chr1	18993193	18993377	CD4_unstim_ND517	6	6.33484	2.8857	CD4_unstim
OCR_970	chr1	19147319	19147561	CD4_unstim_ND517	2	1.60761	1.26988	CD4_unstim
OCR_971	chr1	19201648	19202043	CD4_unstim_ND517	6	2.95946	1.78773	CD4_unstim
OCR_972	chr1	19210678	19210919	CD4_unstim_ND517	7	5.64988	2.69086	CD4_unstim
OCR_973	chr1	19228479	19229751	CD4_unstim_ND517	163	25.0101	4.65326	CD4_unstim
OCR_974	chr1	19236049	19236246	CD4_unstim_ND517	1	0.986486	0.980371	CD4_unstim
OCR_975	chr1	19239578	19239871	CD4_unstim_ND517	8	5.31495	2.57998	CD4_unstim
OCR_976	chr1	19252931	19254760	CD4_unstim_ND517	108	11.5273	3.54028	CD4_unstim
OCR_977	chr1	19260790	19261047	CD4_unstim_ND517	3	2.27121	1.5985	CD4_unstim
OCR_978	chr1	19261166	19261431	CD4_unstim_ND517	2	1.4686	1.13941	CD4_unstim
OCR_979	chr1	19274885	19275456	CD4_unstim_ND517	43	14.6835	3.90929	CD4_unstim
OCR_980	chr1	19276022	19276379	CD4_unstim_ND517	9	4.91039	2.44784	CD4_unstim
OCR_981	chr1	19277094	19277422	CD4_unstim_ND517	6	3.56215	2.05514	CD4_unstim
OCR_982	chr1	19278523	19278855	CD4_unstim_ND517	33	19.3565	4.31781	CD4_unstim
OCR_983	chr1	19281847	19284037	CD4_unstim_ND517	216	19.2561	4.27391	CD4_unstim
OCR_984	chr1	19292212	19292434	CD4_unstim_ND517	1	0.875894	0.808828	CD4_unstim
OCR_985	chr1	19298622	19298800	CD4_unstim_ND517	1	1.0912	1.12591	CD4_unstim
OCR_986	chr1	19299056	19299246	CD4_unstim_ND517	1	1.02264	1.0323	CD4_unstim
OCR_987	chr1	19329865	19330265	CD4_unstim_ND517	0	0	-1.03773	CD4_unstim
OCR_988	chr1	19337291	19338237	CD4_unstim_ND517	21	4.33137	2.18194	CD4_unstim
OCR_989	chr1	19400809	19402150	CD4_unstim_ND517	146	21.2499	4.41923	CD4_unstim
OCR_990	chr1	19414180	19414571	CD4_unstim_ND517	4	1.9931	1.31695	CD4_unstim
OCR_991	chr1	19450457	19450717	CD4_unstim_ND517	10	7.48369	3.04125	CD4_unstim
OCR_992	chr1	19450783	19451433	CD4_unstim_ND517	6	1.80022	1.07057	CD4_unstim
OCR_993	chr1	19496140	19496534	CD4_unstim_ND517	0	0	-1.01598	CD4_unstim
OCR_994	chr1	19506130	19506793	CD4_unstim_ND517	23	6.76575	2.81965	CD4_unstim
OCR_995	chr1	19512534	19512942	CD4_unstim_ND517	0	0	-1.06623	CD4_unstim
OCR_996	chr1	19529028	19529286	CD4_unstim_ND517	4	3.01659	1.91485	CD4_unstim
OCR_997	chr1	19530036	19530257	CD4_unstim_ND517	1	0.879839	0.815312	CD4_unstim
OCR_998	chr1	19535999	19537293	CD4_unstim_ND517	162	24.4344	4.61972	CD4_unstim
OCR_999	chr1	19546809	19547232	CD4_unstim_ND517	2	0.921341	0.46677	CD4_unstim
OCR_1000	chr1	19567803	19568143	CD4_unstim_ND517	10	5.72798	2.65553	CD4_unstim
OCR_1001	chr1	19577378	19577700	CD4_unstim_ND517	4	2.41888	1.59627	CD4_unstim
OCR_1002	chr1	19577766	19579024	CD4_unstim_ND517	91	14.118	3.83523	CD4_unstim
OCR_1003	chr1	19586995	19588456	CD4_unstim_ND517	3	0.400802	-0.904	CD4_unstim
OCR_1004	chr1	19588585	19589019	CD4_unstim_ND517	0	0	-1.15514	CD4_unstim
OCR_1005	chr1	19614878	19615716	CD4_unstim_ND517	17	3.9577	2.06713	CD4_unstim
OCR_1006	chr1	19637785	19639686	CD4_unstim_ND517	99	10.1667	3.36028	CD4_unstim
OCR_1007	chr1	19663005	19663369	CD4_unstim_ND517	6	3.21081	1.90533	CD4_unstim
OCR_1008	chr1	19667995	19668465	CD4_unstim_ND517	14	5.80582	2.63703	CD4_unstim
OCR_1009	chr1	19670916	19671157	CD4_unstim_ND517	12	9.6855	3.3913	CD4_unstim
OCR_1010	chr1	19686633	19686830	CD4_unstim_ND517	9	8.87838	3.3023	CD4_unstim
OCR_1011	chr1	19687923	19688109	CD4_unstim_ND517	4	4.17806	2.38476	CD4_unstim
OCR_1012	chr1	19700926	19701135	CD4_unstim_ND517	0	0	-0.104518	CD4_unstim
OCR_1013	chr1	19716533	19718275	CD4_unstim_ND517	43	4.81867	2.3018	CD4_unstim
OCR_1014	chr1	19718564	19718839	CD4_unstim_ND517	5	3.53848	2.08617	CD4_unstim
OCR_1015	chr1	19726081	19726456	CD4_unstim_ND517	3	1.55844	1.05514	CD4_unstim
OCR_1016	chr1	19732754	19733043	CD4_unstim_ND517	6	4.04119	2.23717	CD4_unstim
OCR_1017	chr1	19756001	19756430	CD4_unstim_ND517	1	0.454243	-0.138465	CD4_unstim
OCR_1018	chr1	19756893	19757466	CD4_unstim_ND517	4	1.36114	0.766749	CD4_unstim
OCR_1019	chr1	19762219	19762926	CD4_unstim_ND517	1	0.275882	-0.857878	CD4_unstim
OCR_1020	chr1	19765982	19766190	CD4_unstim_ND517	7	6.54196	2.90237	CD4_unstim
OCR_1021	chr1	19766399	19766666	CD4_unstim_ND517	5	3.64411	2.1286	CD4_unstim
OCR_1022	chr1	19772333	19772531	CD4_unstim_ND517	9	8.83376	3.29503	CD4_unstim
OCR_1023	chr1	19774081	19774586	CD4_unstim_ND517	8	3.08813	1.79666	CD4_unstim
OCR_1024	chr1	19774850	19775466	CD4_unstim_ND517	5	1.58285	0.925563	CD4_unstim
OCR_1025	chr1	19777254	19777639	CD4_unstim_ND517	4	2.02409	1.3392	CD4_unstim
OCR_1026	chr1	19781091	19781361	CD4_unstim_ND517	4	2.88302	1.84951	CD4_unstim
OCR_1027	chr1	19786087	19786499	CD4_unstim_ND517	11	5.20234	2.50469	CD4_unstim
OCR_1028	chr1	19787277	19788023	CD4_unstim_ND517	11	2.87626	1.64973	CD4_unstim
OCR_1029	chr1	19789658	19790116	CD4_unstim_ND517	69	29.3625	4.89666	CD4_unstim
OCR_1030	chr1	19794866	19795397	CD4_unstim_ND517	70	25.7006	4.70419	CD4_unstim
OCR_1031	chr1	19795940	19796373	CD4_unstim_ND517	4	1.80022	1.1701	CD4_unstim
OCR_1032	chr1	19803313	19804719	CD4_unstim_ND517	66	9.16233	3.21741	CD4_unstim
OCR_1033	chr1	19811420	19812801	CD4_unstim_ND517	303	42.8244	5.42511	CD4_unstim
OCR_1034	chr1	19814803	19814977	CD4_unstim_ND517	6	6.69683	2.96587	CD4_unstim
OCR_1035	chr1	19886181	19886380	CD4_unstim_ND517	0	0	-0.0341286	CD4_unstim
OCR_1036	chr1	19908720	19909206	CD4_unstim_ND517	10	4.01077	2.14138	CD4_unstim
OCR_1037	chr1	19922835	19924374	CD4_unstim_ND517	243	30.8207	4.95175	CD4_unstim
OCR_1038	chr1	19926743	19927070	CD4_unstim_ND517	48	28.584	4.86689	CD4_unstim
OCR_1039	chr1	19932467	19932838	CD4_unstim_ND517	1	0.525065	0.0705687	CD4_unstim
OCR_1040	chr1	19933079	19933630	CD4_unstim_ND517	4	1.41539	0.823131	CD4_unstim
OCR_1041	chr1	19970166	19971724	CD4_unstim_ND517	91	11.4012	3.52688	CD4_unstim
OCR_1042	chr1	19977693	19977941	CD4_unstim_ND517	18	14.1198	3.89765	CD4_unstim
OCR_1043	chr1	19979939	19980578	CD4_unstim_ND517	21	6.40908	2.74723	CD4_unstim
OCR_1044	chr1	19985903	19986098	CD4_unstim_ND517	1	0.996552	0.995018	CD4_unstim
OCR_1045	chr1	19986172	19986614	CD4_unstim_ND517	19	8.37734	3.14049	CD4_unstim
OCR_1046	chr1	19988278	19988475	CD4_unstim_ND517	2	1.97297	1.56533	CD4_unstim
OCR_1047	chr1	19990657	19990841	CD4_unstim_ND517	3	3.16742	2.07835	CD4_unstim
OCR_1048	chr1	19991055	19992290	CD4_unstim_ND517	12	1.89635	1.0387	CD4_unstim
OCR_1049	chr1	19992334	19992692	CD4_unstim_ND517	4	2.17632	1.44382	CD4_unstim
OCR_1050	chr1	20014238	20015309	CD4_unstim_ND517	40	7.28822	2.90119	CD4_unstim
OCR_1051	chr1	20031055	20031326	CD4_unstim_ND517	10	7.18104	2.9817	CD4_unstim
OCR_1052	chr1	20037279	20038086	CD4_unstim_ND517	4	0.966952	0.273444	CD4_unstim
OCR_1053	chr1	20042084	20042587	CD4_unstim_ND517	21	8.13851	3.09188	CD4_unstim
OCR_1054	chr1	20088774	20088983	CD4_unstim_ND517	1	0.930116	0.895482	CD4_unstim
OCR_1055	chr1	20091344	20091493	CD4_unstim_ND517	2	2.60432	1.96587	CD4_unstim
OCR_1056	chr1	20092093	20092444	CD4_unstim_ND517	0	0	-0.849704	CD4_unstim
OCR_1057	chr1	20125689	20127364	CD4_unstim_ND517	57	6.64289	2.7569	CD4_unstim
OCR_1058	chr1	20137802	20138009	CD4_unstim_ND517	4	3.75624	2.23122	CD4_unstim
OCR_1059	chr1	20208582	20209722	CD4_unstim_ND517	97	16.6051	4.06835	CD4_unstim
OCR_1060	chr1	20244567	20244832	CD4_unstim_ND517	4	2.93721	1.87637	CD4_unstim
OCR_1061	chr1	20301396	20301666	CD4_unstim_ND517	4	2.88302	1.84951	CD4_unstim
OCR_1062	chr1	20375950	20376210	CD4_unstim_ND517	1	0.748369	0.581822	CD4_unstim
OCR_1063	chr1	20384978	20385871	CD4_unstim_ND517	6	1.3109	0.612951	CD4_unstim
OCR_1064	chr1	20404830	20405078	CD4_unstim_ND517	2	1.56887	1.23469	CD4_unstim
OCR_1065	chr1	20427475	20427890	CD4_unstim_ND517	7	3.28671	1.90929	CD4_unstim
OCR_1066	chr1	20435856	20436262	CD4_unstim_ND517	1	0.479912	-0.0591574	CD4_unstim
OCR_1067	chr1	20438876	20439055	CD4_unstim_ND517	2	2.17027	1.70284	CD4_unstim
OCR_1068	chr1	20478427	20479317	CD4_unstim_ND517	30	6.57658	2.76464	CD4_unstim
OCR_1069	chr1	20497401	20498377	CD4_unstim_ND517	9	1.7993	0.999441	CD4_unstim
OCR_1070	chr1	20501518	20501784	CD4_unstim_ND517	2	1.4631	1.13399	CD4_unstim
OCR_1071	chr1	20511648	20513239	CD4_unstim_ND517	65	7.97492	3.0175	CD4_unstim
OCR_1072	chr1	20513706	20514482	CD4_unstim_ND517	10	2.51383	1.46739	CD4_unstim
OCR_1073	chr1	20521703	20521988	CD4_unstim_ND517	1	0.682952	0.449856	CD4_unstim
OCR_1074	chr1	20539034	20539823	CD4_unstim_ND517	16	3.95593	2.07148	CD4_unstim
OCR_1075	chr1	20543222	20543422	CD4_unstim_ND517	6	5.83058	2.76603	CD4_unstim
OCR_1076	chr1	20559927	20560183	CD4_unstim_ND517	1	0.760017	0.604103	CD4_unstim
OCR_1077	chr1	20575299	20576204	CD4_unstim_ND517	23	4.95856	2.37132	CD4_unstim
OCR_1078	chr1	20598045	20598230	CD4_unstim_ND517	0	0	0.0705687	CD4_unstim
OCR_1079	chr1	20617969	20618594	CD4_unstim_ND517	7	2.18414	1.31971	CD4_unstim
OCR_1080	chr1	20647287	20647586	CD4_unstim_ND517	2	1.30216	0.965871	CD4_unstim
OCR_1081	chr1	20648470	20649305	CD4_unstim_ND517	15	3.50462	1.90237	CD4_unstim
OCR_1082	chr1	20649369	20650011	CD4_unstim_ND517	23	6.98672	2.86602	CD4_unstim
OCR_1083	chr1	20669181	20670591	CD4_unstim_ND517	24	3.32231	1.79108	CD4_unstim
OCR_1084	chr1	20682565	20682833	CD4_unstim_ND517	2	1.45223	1.12323	CD4_unstim
OCR_1085	chr1	20685850	20686577	CD4_unstim_ND517	2	0.536605	-0.313105	CD4_unstim
OCR_1086	chr1	20698500	20698718	CD4_unstim_ND517	0	0	-0.16506	CD4_unstim
OCR_1087	chr1	20703410	20703710	CD4_unstim_ND517	3	1.94675	1.37611	CD4_unstim
OCR_1088	chr1	20753430	20753729	CD4_unstim_ND517	2	1.30216	0.965871	CD4_unstim
OCR_1089	chr1	20756889	20757191	CD4_unstim_ND517	1	0.644635	0.366554	CD4_unstim
OCR_1090	chr1	20767315	20767601	CD4_unstim_ND517	2	1.36114	1.02978	CD4_unstim
OCR_1091	chr1	20792750	20793076	CD4_unstim_ND517	2	1.19464	0.841543	CD4_unstim
OCR_1092	chr1	20811755	20813615	CD4_unstim_ND517	46	4.828	2.30245	CD4_unstim
OCR_1093	chr1	20820350	20821004	CD4_unstim_ND517	9	2.68385	1.5763	CD4_unstim
OCR_1094	chr1	20822578	20823188	CD4_unstim_ND517	3	0.959039	0.354699	CD4_unstim
OCR_1095	chr1	20833790	20835119	CD4_unstim_ND517	70	10.2802	3.38226	CD4_unstim
OCR_1096	chr1	20848889	20849210	CD4_unstim_ND517	3	1.81979	1.27881	CD4_unstim
OCR_1097	chr1	20901785	20902052	CD4_unstim_ND517	3	2.18647	1.54364	CD4_unstim
OCR_1098	chr1	20959732	20961406	CD4_unstim_ND517	88	10.2618	3.37552	CD4_unstim
OCR_1099	chr1	20966683	20966930	CD4_unstim_ND517	6	4.72559	2.46289	CD4_unstim
OCR_1100	chr1	20987349	20988511	CD4_unstim_ND517	291	48.8731	5.61592	CD4_unstim
OCR_1101	chr1	21022774	21023788	CD4_unstim_ND517	69	13.2782	3.75175	CD4_unstim
OCR_1102	chr1	21043896	21044885	CD4_unstim_ND517	35	6.9054	2.82837	CD4_unstim
OCR_1103	chr1	21057847	21058453	CD4_unstim_ND517	48	15.4457	3.97888	CD4_unstim
OCR_1104	chr1	21058564	21060209	CD4_unstim_ND517	67	7.95062	3.01244	CD4_unstim
OCR_1105	chr1	21112477	21114304	CD4_unstim_ND517	295	31.5212	4.98313	CD4_unstim
OCR_1106	chr1	21193663	21193932	CD4_unstim_ND517	0	0	-0.467088	CD4_unstim
OCR_1107	chr1	21258396	21259620	CD4_unstim_ND517	3	0.478345	-0.648838	CD4_unstim
OCR_1108	chr1	21348654	21349723	CD4_unstim_ND517	8	1.46037	0.716257	CD4_unstim
OCR_1109	chr1	21410471	21411067	CD4_unstim_ND517	3	0.981529	0.38814	CD4_unstim
OCR_1110	chr1	21417625	21417879	CD4_unstim_ND517	1	0.765978	0.615374	CD4_unstim
OCR_1111	chr1	21471918	21472118	CD4_unstim_ND517	0	0	-0.0413241	CD4_unstim
OCR_1112	chr1	21492207	21492457	CD4_unstim_ND517	1	0.778184	0.638184	CD4_unstim
OCR_1113	chr1	21501889	21502128	CD4_unstim_ND517	8	6.51081	2.87276	CD4_unstim
OCR_1114	chr1	21502215	21502457	CD4_unstim_ND517	10	8.03804	3.14435	CD4_unstim
OCR_1115	chr1	21502584	21503965	CD4_unstim_ND517	143	20.2108	4.34711	CD4_unstim
OCR_1116	chr1	21521741	21521967	CD4_unstim_ND517	5	4.3023	2.36814	CD4_unstim
OCR_1117	chr1	21543343	21544033	CD4_unstim_ND517	10	2.82669	1.63662	CD4_unstim
OCR_1118	chr1	21544446	21544704	CD4_unstim_ND517	3	2.26244	1.59292	CD4_unstim
OCR_1119	chr1	21558507	21558717	CD4_unstim_ND517	8	7.40566	3.05855	CD4_unstim
OCR_1120	chr1	21558767	21558949	CD4_unstim_ND517	8	8.53877	3.26395	CD4_unstim
OCR_1121	chr1	21578524	21579218	CD4_unstim_ND517	1	0.281042	-0.831142	CD4_unstim
OCR_1122	chr1	21581773	21582193	CD4_unstim_ND517	5	2.31977	1.47701	CD4_unstim
OCR_1123	chr1	21584776	21585112	CD4_unstim_ND517	9	5.21638	2.53505	CD4_unstim
OCR_1124	chr1	21588296	21588616	CD4_unstim_ND517	2	1.21697	0.868261	CD4_unstim
OCR_1125	chr1	21596728	21597240	CD4_unstim_ND517	17	6.47273	2.77684	CD4_unstim
OCR_1126	chr1	21606436	21607283	CD4_unstim_ND517	17	3.9157	2.05173	CD4_unstim
OCR_1127	chr1	21607678	21608023	CD4_unstim_ND517	1	0.564521	0.175099	CD4_unstim
OCR_1128	chr1	21619401	21620599	CD4_unstim_ND517	90	14.6615	3.88991	CD4_unstim
OCR_1129	chr1	21620746	21621448	CD4_unstim_ND517	347	96.4118	6.59529	CD4_unstim
OCR_1130	chr1	21621504	21621804	CD4_unstim_ND517	17	11.0316	3.54603	CD4_unstim
OCR_1131	chr1	21633755	21634841	CD4_unstim_ND517	16	2.87506	1.61105	CD4_unstim
OCR_1132	chr1	21635760	21635964	CD4_unstim_ND517	4	3.81121	2.25218	CD4_unstim
OCR_1133	chr1	21650709	21652342	CD4_unstim_ND517	36	4.30335	2.14499	CD4_unstim
OCR_1134	chr1	21655997	21656327	CD4_unstim_ND517	24	14.1625	3.8829	CD4_unstim
OCR_1135	chr1	21660575	21662018	CD4_unstim_ND517	100	13.5266	3.77208	CD4_unstim
OCR_1136	chr1	21664373	21664550	CD4_unstim_ND517	2	2.19465	1.71896	CD4_unstim
OCR_1137	chr1	21669975	21670309	CD4_unstim_ND517	16	9.32892	3.30917	CD4_unstim
OCR_1138	chr1	21671121	21672457	CD4_unstim_ND517	126	18.4075	4.21363	CD4_unstim
OCR_1139	chr1	21682474	21682804	CD4_unstim_ND517	4	2.36041	1.56097	CD4_unstim
OCR_1140	chr1	21695028	21695419	CD4_unstim_ND517	9	4.48449	2.31695	CD4_unstim
OCR_1141	chr1	21724285	21724680	CD4_unstim_ND517	4	1.97297	1.3023	CD4_unstim
OCR_1142	chr1	21766210	21767567	CD4_unstim_ND517	50	7.19162	2.87489	CD4_unstim
OCR_1143	chr1	21815330	21815506	CD4_unstim_ND517	3	3.31058	2.14212	CD4_unstim
OCR_1144	chr1	21835132	21836378	CD4_unstim_ND517	20	3.13271	1.7178	CD4_unstim
OCR_1145	chr1	21934020	21934657	CD4_unstim_ND517	6	1.83691	1.09967	CD4_unstim
OCR_1146	chr1	21948510	21949432	CD4_unstim_ND517	6	1.26971	0.566896	CD4_unstim
OCR_1147	chr1	21965110	21965800	CD4_unstim_ND517	1	0.282669	-0.822814	CD4_unstim
OCR_1148	chr1	21977744	21979219	CD4_unstim_ND517	30	3.97001	2.03645	CD4_unstim
OCR_1149	chr1	21985537	21986316	CD4_unstim_ND517	33	8.26372	3.08986	CD4_unstim
OCR_1150	chr1	21995509	21996729	CD4_unstim_ND517	39	6.23886	2.67781	CD4_unstim
OCR_1151	chr1	22069197	22069377	CD4_unstim_ND517	0	0	0.109882	CD4_unstim
OCR_1152	chr1	22092669	22093299	CD4_unstim_ND517	0	0	-1.69177	CD4_unstim
OCR_1153	chr1	22106271	22106630	CD4_unstim_ND517	5	2.71284	1.70284	CD4_unstim
OCR_1154	chr1	22108766	22110342	CD4_unstim_ND517	246	30.4691	4.93513	CD4_unstim
OCR_1155	chr1	22140790	22141444	CD4_unstim_ND517	17	5.06949	2.4243	CD4_unstim
OCR_1156	chr1	22141497	22141906	CD4_unstim_ND517	5	2.382	1.51521	CD4_unstim
OCR_1157	chr1	22145207	22145496	CD4_unstim_ND517	6	4.04119	2.23717	CD4_unstim
OCR_1158	chr1	22231357	22231688	CD4_unstim_ND517	2	1.17665	0.819651	CD4_unstim
OCR_1159	chr1	22236076	22236906	CD4_unstim_ND517	5	1.17524	0.495985	CD4_unstim
OCR_1160	chr1	22240327	22240600	CD4_unstim_ND517	5	3.56431	2.09666	CD4_unstim
OCR_1161	chr1	22262987	22264544	CD4_unstim_ND517	81	10.1549	3.3618	CD4_unstim
OCR_1162	chr1	22283224	22284121	CD4_unstim_ND517	70	15.2257	3.9489	CD4_unstim
OCR_1163	chr1	22290342	22290792	CD4_unstim_ND517	9	3.89782	2.11467	CD4_unstim
OCR_1164	chr1	22345380	22346043	CD4_unstim_ND517	36	10.5899	3.44414	CD4_unstim
OCR_1165	chr1	22350912	22351237	CD4_unstim_ND517	104	62.312	5.97524	CD4_unstim
OCR_1166	chr1	22351408	22352864	CD4_unstim_ND517	300	40.2178	5.33456	CD4_unstim
OCR_1167	chr1	22353477	22353683	CD4_unstim_ND517	0	0	-0.0837594	CD4_unstim
OCR_1168	chr1	22357743	22358481	CD4_unstim_ND517	29	7.66496	2.98719	CD4_unstim
OCR_1169	chr1	22366065	22367204	CD4_unstim_ND517	232	39.7502	5.3191	CD4_unstim
OCR_1170	chr1	22374792	22375235	CD4_unstim_ND517	1	0.43992	-0.184688	CD4_unstim
OCR_1171	chr1	22378873	22380299	CD4_unstim_ND517	194	26.5542	4.73829	CD4_unstim
OCR_1172	chr1	22383526	22383726	CD4_unstim_ND517	2	1.94353	1.54364	CD4_unstim
OCR_1173	chr1	22392679	22393032	CD4_unstim_ND517	4	2.20705	1.46405	CD4_unstim
OCR_1174	chr1	22401135	22401423	CD4_unstim_ND517	4	2.70345	1.75673	CD4_unstim
OCR_1175	chr1	22402136	22402741	CD4_unstim_ND517	9	2.90086	1.68848	CD4_unstim
OCR_1176	chr1	22403524	22403883	CD4_unstim_ND517	1	0.542567	0.117874	CD4_unstim
OCR_1177	chr1	22404317	22404581	CD4_unstim_ND517	2	1.47415	1.14484	CD4_unstim
OCR_1178	chr1	22415465	22415831	CD4_unstim_ND517	2	1.06444	0.675054	CD4_unstim
OCR_1179	chr1	22416296	22416795	CD4_unstim_ND517	12	4.68778	2.34438	CD4_unstim
OCR_1180	chr1	22418875	22419433	CD4_unstim_ND517	10	3.49417	1.94245	CD4_unstim
OCR_1181	chr1	22430414	22430807	CD4_unstim_ND517	0	0	-1.01232	CD4_unstim
OCR_1182	chr1	22431311	22431758	CD4_unstim_ND517	32	13.9517	3.84677	CD4_unstim
OCR_1183	chr1	22432025	22432453	CD4_unstim_ND517	10	4.55301	2.32433	CD4_unstim
OCR_1184	chr1	22447219	22447670	CD4_unstim_ND517	1	0.432133	-0.210451	CD4_unstim
OCR_1185	chr1	22458422	22458834	CD4_unstim_ND517	3	1.41882	0.91973	CD4_unstim
OCR_1186	chr1	22468739	22470300	CD4_unstim_ND517	31	3.87647	2.00055	CD4_unstim
OCR_1187	chr1	22502583	22503205	CD4_unstim_ND517	3	0.940566	0.326639	CD4_unstim
OCR_1188	chr1	22503799	22504354	CD4_unstim_ND517	5	1.75651	1.07575	CD4_unstim
OCR_1189	chr1	22602416	22602637	CD4_unstim_ND517	7	6.15887	2.81531	CD4_unstim
OCR_1190	chr1	22725283	22725731	CD4_unstim_ND517	7	3.04514	1.79916	CD4_unstim
OCR_1191	chr1	22743071	22743405	CD4_unstim_ND517	8	4.66446	2.39164	CD4_unstim
OCR_1192	chr1	22747016	22747234	CD4_unstim_ND517	3	2.67568	1.83494	CD4_unstim
OCR_1193	chr1	22755184	22755580	CD4_unstim_ND517	10	4.92001	2.43616	CD4_unstim
OCR_1194	chr1	22777954	22779165	CD4_unstim_ND517	131	21.1118	4.41095	CD4_unstim
OCR_1195	chr1	22779212	22779395	CD4_unstim_ND517	12	12.7385	3.78661	CD4_unstim
OCR_1196	chr1	22866091	22866288	CD4_unstim_ND517	7	6.9054	2.98037	CD4_unstim
OCR_1197	chr1	22968369	22968977	CD4_unstim_ND517	15	4.81094	2.35943	CD4_unstim
OCR_1198	chr1	23030665	23031460	CD4_unstim_ND517	6	1.47229	0.780458	CD4_unstim
OCR_1199	chr1	23036775	23037915	CD4_unstim_ND517	11	1.88306	1.03861	CD4_unstim
OCR_1200	chr1	23158628	23158825	CD4_unstim_ND517	3	2.95946	1.98037	CD4_unstim
OCR_1201	chr1	23215818	23215993	CD4_unstim_ND517	0	0	0.150296	CD4_unstim
OCR_1202	chr1	23290582	23291002	CD4_unstim_ND517	3	1.39186	0.892051	CD4_unstim
OCR_1203	chr1	23302955	23303213	CD4_unstim_ND517	9	6.78733	2.91485	CD4_unstim
OCR_1204	chr1	23345457	23346950	CD4_unstim_ND517	102	13.3354	3.75126	CD4_unstim
OCR_1205	chr1	23353034	23353407	CD4_unstim_ND517	2	1.04451	0.647796	CD4_unstim
OCR_1206	chr1	23356766	23357216	CD4_unstim_ND517	1	0.433092	-0.207256	CD4_unstim
OCR_1207	chr1	23425279	23425555	CD4_unstim_ND517	2	1.41028	1.08095	CD4_unstim
OCR_1208	chr1	23429848	23430343	CD4_unstim_ND517	27	10.6326	3.46289	CD4_unstim
OCR_1209	chr1	23435439	23435813	CD4_unstim_ND517	1	0.520865	0.0589808	CD4_unstim
OCR_1210	chr1	23437255	23437754	CD4_unstim_ND517	9	3.51584	1.96587	CD4_unstim
OCR_1211	chr1	23437938	23438479	CD4_unstim_ND517	4	1.44151	0.849507	CD4_unstim
OCR_1212	chr1	23440840	23441077	CD4_unstim_ND517	11	9.02759	3.29987	CD4_unstim
OCR_1213	chr1	23445710	23446176	CD4_unstim_ND517	13	5.43729	2.5498	CD4_unstim
OCR_1214	chr1	23474375	23475026	CD4_unstim_ND517	7	2.09704	1.261	CD4_unstim
OCR_1215	chr1	23475400	23475600	CD4_unstim_ND517	4	3.88705	2.2806	CD4_unstim
OCR_1216	chr1	23494116	23495828	CD4_unstim_ND517	87	9.92015	3.32685	CD4_unstim
OCR_1217	chr1	23496167	23496431	CD4_unstim_ND517	20	14.7415	3.9522	CD4_unstim
OCR_1218	chr1	23500960	23501187	CD4_unstim_ND517	2	1.71337	1.3618	CD4_unstim
OCR_1219	chr1	23503974	23504625	CD4_unstim_ND517	19	5.69197	2.58293	CD4_unstim
OCR_1220	chr1	23511100	23511482	CD4_unstim_ND517	5	2.54993	1.61349	CD4_unstim
OCR_1221	chr1	23543275	23544627	CD4_unstim_ND517	19	2.74291	1.52971	CD4_unstim
OCR_1222	chr1	23655240	23655444	CD4_unstim_ND517	1	0.952801	0.930247	CD4_unstim
OCR_1223	chr1	23669779	23671665	CD4_unstim_ND517	171	17.7003	4.15411	CD4_unstim
OCR_1224	chr1	23694383	23695116	CD4_unstim_ND517	376	100.057	6.64851	CD4_unstim
OCR_1225	chr1	23695220	23695789	CD4_unstim_ND517	227	77.787	6.2878	CD4_unstim
OCR_1226	chr1	23730108	23730922	CD4_unstim_ND517	19	4.55357	2.261	CD4_unstim
OCR_1227	chr1	23748618	23749236	CD4_unstim_ND517	77	24.2972	4.62133	CD4_unstim
OCR_1228	chr1	23749284	23749488	CD4_unstim_ND517	20	19.056	4.32256	CD4_unstim
OCR_1229	chr1	23749539	23750020	CD4_unstim_ND517	6	2.43142	1.50419	CD4_unstim
OCR_1230	chr1	23750252	23751849	CD4_unstim_ND517	47	5.74483	2.55264	CD4_unstim
OCR_1231	chr1	23763126	23763506	CD4_unstim_ND517	5	2.56331	1.62104	CD4_unstim
OCR_1232	chr1	23778392	23778788	CD4_unstim_ND517	14	6.88801	2.88362	CD4_unstim
OCR_1233	chr1	23810146	23811572	CD4_unstim_ND517	173	23.6798	4.5739	CD4_unstim
OCR_1234	chr1	23823614	23823863	CD4_unstim_ND517	3	2.34389	1.64394	CD4_unstim
OCR_1235	chr1	23851196	23851911	CD4_unstim_ND517	8	2.18239	1.29584	CD4_unstim
OCR_1236	chr1	23854743	23855009	CD4_unstim_ND517	19	13.8995	3.87096	CD4_unstim
OCR_1237	chr1	23857027	23858186	CD4_unstim_ND517	60	10.103	3.36056	CD4_unstim
OCR_1238	chr1	23866009	23866893	CD4_unstim_ND517	39	8.60751	3.14212	CD4_unstim
OCR_1239	chr1	23871262	23871664	CD4_unstim_ND517	5	2.42338	1.54005	CD4_unstim
OCR_1240	chr1	23880908	23882085	CD4_unstim_ND517	151	25.0373	4.65553	CD4_unstim
OCR_1241	chr1	23882790	23882969	CD4_unstim_ND517	11	11.9365	3.70284	CD4_unstim
OCR_1242	chr1	23883244	23883461	CD4_unstim_ND517	11	9.85581	3.42651	CD4_unstim
OCR_1243	chr1	23885651	23886392	CD4_unstim_ND517	70	18.4268	4.2242	CD4_unstim
OCR_1244	chr1	23894219	23894431	CD4_unstim_ND517	1	0.917015	0.875018	CD4_unstim
OCR_1245	chr1	23894524	23894740	CD4_unstim_ND517	1	0.900112	0.848176	CD4_unstim
OCR_1246	chr1	23894862	23895344	CD4_unstim_ND517	4	1.61759	1.01578	CD4_unstim
OCR_1247	chr1	23903111	23904330	CD4_unstim_ND517	15	2.40153	1.35706	CD4_unstim
OCR_1248	chr1	23904879	23905097	CD4_unstim_ND517	7	6.24324	2.83494	CD4_unstim
OCR_1249	chr1	23905481	23905708	CD4_unstim_ND517	2	1.71337	1.3618	CD4_unstim
OCR_1250	chr1	23916958	23917201	CD4_unstim_ND517	0	0	-0.32101	CD4_unstim
OCR_1251	chr1	23917885	23918447	CD4_unstim_ND517	6	2.08161	1.28009	CD4_unstim
OCR_1252	chr1	23918535	23918710	CD4_unstim_ND517	5	5.54899	2.73526	CD4_unstim
OCR_1253	chr1	23926780	23926988	CD4_unstim_ND517	2	1.86913	1.48733	CD4_unstim
OCR_1254	chr1	23927562	23929093	CD4_unstim_ND517	42	5.35484	2.45479	CD4_unstim
OCR_1255	chr1	23933323	23934352	CD4_unstim_ND517	14	2.65489	1.50819	CD4_unstim
OCR_1256	chr1	23938521	23938797	CD4_unstim_ND517	8	5.64113	2.66591	CD4_unstim
OCR_1257	chr1	23939530	23940350	CD4_unstim_ND517	35	8.32686	3.09841	CD4_unstim
OCR_1258	chr1	23943574	23943804	CD4_unstim_ND517	3	2.53668	1.75798	CD4_unstim
OCR_1259	chr1	23945261	23945478	CD4_unstim_ND517	4	3.58393	2.16347	CD4_unstim
OCR_1260	chr1	23945746	23946861	CD4_unstim_ND517	107	18.7273	4.24049	CD4_unstim
OCR_1261	chr1	23950947	23951252	CD4_unstim_ND517	1	0.638315	0.35234	CD4_unstim
OCR_1262	chr1	23953451	23954212	CD4_unstim_ND517	37	9.48425	3.28401	CD4_unstim
OCR_1263	chr1	23954399	23954684	CD4_unstim_ND517	4	2.73181	1.77178	CD4_unstim
OCR_1264	chr1	23955418	23955701	CD4_unstim_ND517	10	6.87762	2.91941	CD4_unstim
OCR_1265	chr1	23961174	23962387	CD4_unstim_ND517	17	2.73518	1.5341	CD4_unstim
OCR_1266	chr1	23963759	23964209	CD4_unstim_ND517	13	5.63019	2.6001	CD4_unstim
OCR_1267	chr1	23984273	23984458	CD4_unstim_ND517	8	8.40104	3.24049	CD4_unstim
OCR_1268	chr1	24018058	24018924	CD4_unstim_ND517	87	19.6	4.30927	CD4_unstim
OCR_1269	chr1	24019078	24019303	CD4_unstim_ND517	2	1.72853	1.37451	CD4_unstim
OCR_1270	chr1	24026324	24026576	CD4_unstim_ND517	3	2.3161	1.62673	CD4_unstim
OCR_1271	chr1	24036307	24036784	CD4_unstim_ND517	0	0	-1.29114	CD4_unstim
OCR_1272	chr1	24047050	24047518	CD4_unstim_ND517	1	0.41647	-0.263717	CD4_unstim
OCR_1273	chr1	24069369	24070769	CD4_unstim_ND517	105	14.6389	3.88541	CD4_unstim
OCR_1274	chr1	24072131	24072306	CD4_unstim_ND517	1	1.1098	1.1503	CD4_unstim
OCR_1275	chr1	24077873	24078086	CD4_unstim_ND517	2	1.82546	1.45322	CD4_unstim
OCR_1276	chr1	24098661	24099105	CD4_unstim_ND517	13	5.7061	2.61942	CD4_unstim
OCR_1277	chr1	24104321	24105566	CD4_unstim_ND517	78	12.2274	3.63042	CD4_unstim
OCR_1278	chr1	24106294	24106516	CD4_unstim_ND517	1	0.875894	0.808828	CD4_unstim
OCR_1279	chr1	24106573	24106787	CD4_unstim_ND517	2	1.81697	1.4465	CD4_unstim
OCR_1280	chr1	24117269	24118577	CD4_unstim_ND517	70	10.4451	3.40523	CD4_unstim
OCR_1281	chr1	24118806	24118983	CD4_unstim_ND517	5	5.48664	2.71896	CD4_unstim
OCR_1282	chr1	24125992	24127898	CD4_unstim_ND517	115	11.7789	3.57062	CD4_unstim
OCR_1283	chr1	24136215	24136562	CD4_unstim_ND517	22	12.3481	3.69035	CD4_unstim
OCR_1284	chr1	24137301	24137609	CD4_unstim_ND517	13	8.21753	3.14562	CD4_unstim
OCR_1285	chr1	24151382	24152227	CD4_unstim_ND517	52	12.0057	3.61313	CD4_unstim
OCR_1286	chr1	24152294	24152717	CD4_unstim_ND517	15	6.91006	2.88181	CD4_unstim
OCR_1287	chr1	24164349	24165462	CD4_unstim_ND517	41	7.18878	2.88051	CD4_unstim
OCR_1288	chr1	24194044	24195440	CD4_unstim_ND517	119	16.6382	4.0685	CD4_unstim
OCR_1289	chr1	24222893	24223483	CD4_unstim_ND517	27	8.92344	3.21007	CD4_unstim
OCR_1290	chr1	24234313	24234532	CD4_unstim_ND517	3	2.66351	1.82837	CD4_unstim
OCR_1291	chr1	24235256	24236177	CD4_unstim_ND517	21	4.44882	2.22054	CD4_unstim
OCR_1292	chr1	24237320	24237656	CD4_unstim_ND517	3	1.73879	1.21312	CD4_unstim
OCR_1293	chr1	24239796	24239999	CD4_unstim_ND517	12	11.4897	3.63774	CD4_unstim
OCR_1294	chr1	24243292	24243614	CD4_unstim_ND517	11	6.65191	2.8593	CD4_unstim
OCR_1295	chr1	24275715	24275948	CD4_unstim_ND517	4	3.33888	2.06129	CD4_unstim
OCR_1296	chr1	24285416	24286983	CD4_unstim_ND517	417	51.9453	5.70238	CD4_unstim
OCR_1297	chr1	24290736	24291041	CD4_unstim_ND517	0	0	-0.64766	CD4_unstim
OCR_1298	chr1	24291100	24291651	CD4_unstim_ND517	0	0	-1.4988	CD4_unstim
OCR_1299	chr1	24306260	24307181	CD4_unstim_ND517	166	35.1668	5.14481	CD4_unstim
OCR_1300	chr1	24307277	24307552	CD4_unstim_ND517	22	15.5693	4.02477	CD4_unstim
OCR_1301	chr1	24354674	24354855	CD4_unstim_ND517	1	1.07321	1.10193	CD4_unstim
OCR_1302	chr1	24397352	24397954	CD4_unstim_ND517	22	7.12626	2.89728	CD4_unstim
OCR_1303	chr1	24398008	24398211	CD4_unstim_ND517	4	3.82989	2.25923	CD4_unstim
OCR_1304	chr1	24418556	24418771	CD4_unstim_ND517	2	1.80856	1.4398	CD4_unstim
OCR_1305	chr1	24438727	24439325	CD4_unstim_ND517	8	2.60867	1.55324	CD4_unstim
OCR_1306	chr1	24476256	24478013	CD4_unstim_ND517	32	3.55539	1.8744	CD4_unstim
OCR_1307	chr1	24513470	24514542	CD4_unstim_ND517	50	9.10178	3.21472	CD4_unstim
OCR_1308	chr1	24516736	24516949	CD4_unstim_ND517	5	4.56365	2.45322	CD4_unstim
OCR_1309	chr1	24518413	24518752	CD4_unstim_ND517	7	4.02138	2.20034	CD4_unstim
OCR_1310	chr1	24521641	24521922	CD4_unstim_ND517	1	0.692639	0.470176	CD4_unstim
OCR_1311	chr1	24525815	24526900	CD4_unstim_ND517	15	2.69785	1.52492	CD4_unstim
OCR_1312	chr1	24562732	24563031	CD4_unstim_ND517	2	1.30216	0.965871	CD4_unstim
OCR_1313	chr1	24603980	24604328	CD4_unstim_ND517	2	1.11934	0.747607	CD4_unstim
OCR_1314	chr1	24636253	24636612	CD4_unstim_ND517	3	1.6277	1.11787	CD4_unstim
OCR_1315	chr1	24643634	24643839	CD4_unstim_ND517	2	1.89635	1.50819	CD4_unstim
OCR_1316	chr1	24645764	24646302	CD4_unstim_ND517	10	3.62383	1.99502	CD4_unstim
OCR_1317	chr1	24648095	24649143	CD4_unstim_ND517	44	8.19282	3.06678	CD4_unstim
OCR_1318	chr1	24649214	24649577	CD4_unstim_ND517	13	6.97587	2.90929	CD4_unstim
OCR_1319	chr1	24676196	24676836	CD4_unstim_ND517	1	0.304718	-0.714453	CD4_unstim
OCR_1320	chr1	24677780	24678295	CD4_unstim_ND517	5	1.89268	1.18346	CD4_unstim
OCR_1321	chr1	24678748	24678988	CD4_unstim_ND517	1	0.810474	0.696838	CD4_unstim
OCR_1322	chr1	24691727	24692229	CD4_unstim_ND517	1	0.388319	-0.364687	CD4_unstim
OCR_1323	chr1	24710764	24711128	CD4_unstim_ND517	7	3.74595	2.09797	CD4_unstim
OCR_1324	chr1	24711753	24711990	CD4_unstim_ND517	6	4.92414	2.52226	CD4_unstim
OCR_1325	chr1	24717821	24718109	CD4_unstim_ND517	18	12.1655	3.68273	CD4_unstim
OCR_1326	chr1	24718470	24720079	CD4_unstim_ND517	47	5.70201	2.54185	CD4_unstim
OCR_1327	chr1	24739791	24740454	CD4_unstim_ND517	23	6.76575	2.81965	CD4_unstim
OCR_1328	chr1	24741756	24742765	CD4_unstim_ND517	170	32.8764	5.04744	CD4_unstim
OCR_1329	chr1	24743258	24743652	CD4_unstim_ND517	29	14.3403	3.89091	CD4_unstim
OCR_1330	chr1	24750704	24751040	CD4_unstim_ND517	2	1.15919	0.798085	CD4_unstim
OCR_1331	chr1	24756097	24756321	CD4_unstim_ND517	1	0.868108	0.795946	CD4_unstim
OCR_1332	chr1	24762252	24762740	CD4_unstim_ND517	4	1.59774	0.997965	CD4_unstim
OCR_1333	chr1	24790272	24790824	CD4_unstim_ND517	11	3.88529	2.08355	CD4_unstim
OCR_1334	chr1	24801953	24802678	CD4_unstim_ND517	15	4.03563	2.1059	CD4_unstim
OCR_1335	chr1	24807587	24807967	CD4_unstim_ND517	43	22.0445	4.49551	CD4_unstim
OCR_1336	chr1	24808166	24808793	CD4_unstim_ND517	54	16.7954	4.09647	CD4_unstim
OCR_1337	chr1	24809810	24810218	CD4_unstim_ND517	31	14.8045	3.93377	CD4_unstim
OCR_1338	chr1	24810690	24810938	CD4_unstim_ND517	2	1.56887	1.23469	CD4_unstim
OCR_1339	chr1	24812805	24813220	CD4_unstim_ND517	43	20.1898	4.36872	CD4_unstim
OCR_1340	chr1	24813321	24813498	CD4_unstim_ND517	27	29.6278	4.94135	CD4_unstim
OCR_1341	chr1	24814430	24815158	CD4_unstim_ND517	4	1.07174	0.421881	CD4_unstim
OCR_1342	chr1	24825767	24825998	CD4_unstim_ND517	1	0.841915	0.751747	CD4_unstim
OCR_1343	chr1	24828012	24828196	CD4_unstim_ND517	31	32.73	5.07835	CD4_unstim
OCR_1344	chr1	24828405	24829932	CD4_unstim_ND517	401	51.2598	5.68335	CD4_unstim
OCR_1345	chr1	24833089	24833351	CD4_unstim_ND517	27	20.0523	4.37816	CD4_unstim
OCR_1346	chr1	24834674	24834965	CD4_unstim_ND517	10	6.68919	2.87933	CD4_unstim
OCR_1347	chr1	24840287	24840498	CD4_unstim_ND517	2	1.84268	1.46677	CD4_unstim
OCR_1348	chr1	24853526	24853978	CD4_unstim_ND517	5	2.1559	1.37132	CD4_unstim
OCR_1349	chr1	24861490	24862208	CD4_unstim_ND517	54	14.6697	3.90124	CD4_unstim
OCR_1350	chr1	24862923	24863452	CD4_unstim_ND517	111	40.9075	5.36723	CD4_unstim
OCR_1351	chr1	24867561	24867973	CD4_unstim_ND517	2	0.94588	0.504692	CD4_unstim
OCR_1352	chr1	24881874	24883361	CD4_unstim_ND517	24	3.15039	1.71442	CD4_unstim
OCR_1353	chr1	24894631	24894821	CD4_unstim_ND517	2	2.04528	1.61726	CD4_unstim
OCR_1354	chr1	24913368	24914212	CD4_unstim_ND517	21	4.85421	2.34635	CD4_unstim
OCR_1355	chr1	24961704	24962046	CD4_unstim_ND517	5	2.84729	1.77263	CD4_unstim
OCR_1356	chr1	24968625	24970423	CD4_unstim_ND517	408	44.2981	5.47271	CD4_unstim
OCR_1357	chr1	24986448	24986819	CD4_unstim_ND517	2	1.05013	0.655531	CD4_unstim
OCR_1358	chr1	24993378	24993603	CD4_unstim_ND517	0	0	-0.210451	CD4_unstim
OCR_1359	chr1	25015100	25015342	CD4_unstim_ND517	4	3.21521	2.00684	CD4_unstim
OCR_1360	chr1	25031826	25032115	CD4_unstim_ND517	8	5.38826	2.59974	CD4_unstim
OCR_1361	chr1	25048478	25049659	CD4_unstim_ND517	16	2.64398	1.49018	CD4_unstim
OCR_1362	chr1	25071218	25072578	CD4_unstim_ND517	215	30.8558	4.95416	CD4_unstim
OCR_1363	chr1	25130490	25130955	CD4_unstim_ND517	1	0.419151	-0.254459	CD4_unstim
OCR_1364	chr1	25131023	25131274	CD4_unstim_ND517	1	0.775096	0.632448	CD4_unstim
OCR_1365	chr1	25157243	25157489	CD4_unstim_ND517	2	1.58157	1.24632	CD4_unstim
OCR_1366	chr1	25161557	25161716	CD4_unstim_ND517	1	1.22078	1.2878	CD4_unstim
OCR_1367	chr1	25174294	25175452	CD4_unstim_ND517	81	13.6508	3.78861	CD4_unstim
OCR_1368	chr1	25197186	25197765	CD4_unstim_ND517	8	2.69413	1.59974	CD4_unstim
OCR_1369	chr1	25197841	25198270	CD4_unstim_ND517	2	0.908485	0.446497	CD4_unstim
OCR_1370	chr1	25224305	25225078	CD4_unstim_ND517	8	2.01886	1.18346	CD4_unstim
OCR_1371	chr1	25226117	25226532	CD4_unstim_ND517	2	0.939059	0.49425	CD4_unstim
OCR_1372	chr1	25237332	25238126	CD4_unstim_ND517	71	17.4441	4.14484	CD4_unstim
OCR_1373	chr1	25248813	25249087	CD4_unstim_ND517	7	4.97189	2.50644	CD4_unstim
OCR_1374	chr1	25251274	25251959	CD4_unstim_ND517	67	19.0769	4.27513	CD4_unstim
OCR_1375	chr1	25255051	25255256	CD4_unstim_ND517	28	26.5489	4.78121	CD4_unstim
OCR_1376	chr1	25255379	25257247	CD4_unstim_ND517	255	26.6494	4.74168	CD4_unstim
OCR_1377	chr1	25258811	25259014	CD4_unstim_ND517	9	8.61725	3.25923	CD4_unstim
OCR_1378	chr1	25280490	25280987	CD4_unstim_ND517	6	2.3533	1.45708	CD4_unstim
OCR_1379	chr1	25281149	25282164	CD4_unstim_ND517	13	2.49923	1.4284	CD4_unstim
OCR_1380	chr1	25284115	25284326	CD4_unstim_ND517	3	2.76402	1.88181	CD4_unstim
OCR_1381	chr1	25290080	25290288	CD4_unstim_ND517	14	13.0839	3.80926	CD4_unstim
OCR_1382	chr1	25291329	25292062	CD4_unstim_ND517	84	22.3532	4.49948	CD4_unstim
OCR_1383	chr1	25293286	25293457	CD4_unstim_ND517	1	1.13561	1.18346	CD4_unstim
OCR_1384	chr1	25297359	25298476	CD4_unstim_ND517	12	2.0965	1.18346	CD4_unstim
OCR_1385	chr1	25304972	25305374	CD4_unstim_ND517	7	3.39273	1.95509	CD4_unstim
OCR_1386	chr1	25307096	25307268	CD4_unstim_ND517	1	1.12904	1.1751	CD4_unstim
OCR_1387	chr1	25307470	25308583	CD4_unstim_ND517	17	2.98071	1.65812	CD4_unstim
OCR_1388	chr1	25311617	25311866	CD4_unstim_ND517	10	7.81297	3.10337	CD4_unstim
OCR_1389	chr1	25314704	25315081	CD4_unstim_ND517	7	3.61712	2.04749	CD4_unstim
OCR_1390	chr1	25317828	25318063	CD4_unstim_ND517	3	2.48294	1.72708	CD4_unstim
OCR_1391	chr1	25318229	25318517	CD4_unstim_ND517	4	2.70345	1.75673	CD4_unstim
OCR_1392	chr1	25318980	25319784	CD4_unstim_ND517	24	5.82333	2.60074	CD4_unstim
OCR_1393	chr1	25324018	25324605	CD4_unstim_ND517	16	5.31495	2.49752	CD4_unstim
OCR_1394	chr1	25329963	25330477	CD4_unstim_ND517	4	1.51708	0.923227	CD4_unstim
OCR_1395	chr1	25333973	25334177	CD4_unstim_ND517	4	3.81121	2.25218	CD4_unstim
OCR_1396	chr1	25336302	25336675	CD4_unstim_ND517	5	2.61129	1.6478	CD4_unstim
OCR_1397	chr1	25338861	25339232	CD4_unstim_ND517	8	4.20052	2.24049	CD4_unstim
OCR_1398	chr1	25347875	25348069	CD4_unstim_ND517	1	1.00166	1.0024	CD4_unstim
OCR_1399	chr1	25348587	25349843	CD4_unstim_ND517	364	56.5617	5.82571	CD4_unstim
OCR_1400	chr1	25357117	25357641	CD4_unstim_ND517	15	5.58069	2.57355	CD4_unstim
OCR_1401	chr1	25357974	25358507	CD4_unstim_ND517	10	3.65776	2.00846	CD4_unstim
OCR_1402	chr1	25358623	25359177	CD4_unstim_ND517	54	19.0045	4.27474	CD4_unstim
OCR_1403	chr1	25363700	25363949	CD4_unstim_ND517	5	3.90649	2.22891	CD4_unstim
OCR_1404	chr1	25364092	25364488	CD4_unstim_ND517	12	5.90401	2.67717	CD4_unstim
OCR_1405	chr1	25391050	25391350	CD4_unstim_ND517	0	0	-0.623892	CD4_unstim
OCR_1406	chr1	25422253	25422505	CD4_unstim_ND517	7	5.40423	2.62673	CD4_unstim
OCR_1407	chr1	25425928	25426420	CD4_unstim_ND517	13	5.15054	2.47164	CD4_unstim
OCR_1408	chr1	25427859	25428579	CD4_unstim_ND517	5	1.35454	0.700835	CD4_unstim
OCR_1409	chr1	25432783	25433032	CD4_unstim_ND517	2	1.56259	1.22891	CD4_unstim
OCR_1410	chr1	25436198	25436507	CD4_unstim_ND517	15	9.45118	3.3336	CD4_unstim
OCR_1411	chr1	25444881	25445772	CD4_unstim_ND517	3	0.65692	-0.191172	CD4_unstim
OCR_1412	chr1	25446864	25447343	CD4_unstim_ND517	5	2.03463	1.2878	CD4_unstim
OCR_1413	chr1	25475261	25475480	CD4_unstim_ND517	1	0.887838	0.828368	CD4_unstim
OCR_1414	chr1	25524558	25525530	CD4_unstim_ND517	14	2.81042	1.59032	CD4_unstim
OCR_1415	chr1	25531248	25531639	CD4_unstim_ND517	3	1.49483	0.995018	CD4_unstim
OCR_1416	chr1	25558486	25559932	CD4_unstim_ND517	122	16.4683	4.05339	CD4_unstim
OCR_1417	chr1	25566053	25566992	CD4_unstim_ND517	98	20.3636	4.36257	CD4_unstim
OCR_1418	chr1	25572649	25574615	CD4_unstim_ND517	194	19.2643	4.27528	CD4_unstim
OCR_1419	chr1	25593031	25593321	CD4_unstim_ND517	10	6.71217	2.88428	CD4_unstim
OCR_1420	chr1	25593743	25595033	CD4_unstim_ND517	55	8.32133	3.08281	CD4_unstim
OCR_1421	chr1	25664096	25665811	CD4_unstim_ND517	87	9.9028	3.32433	CD4_unstim
OCR_1422	chr1	25682371	25682708	CD4_unstim_ND517	2	1.15577	0.793811	CD4_unstim
OCR_1423	chr1	25683456	25683709	CD4_unstim_ND517	2	1.53799	1.20601	CD4_unstim
OCR_1424	chr1	25683780	25684235	CD4_unstim_ND517	1	0.428343	-0.223162	CD4_unstim
OCR_1425	chr1	25756374	25757937	CD4_unstim_ND517	427	53.327	5.74017	CD4_unstim
OCR_1426	chr1	25769666	25770200	CD4_unstim_ND517	9	3.28583	1.86826	CD4_unstim
OCR_1427	chr1	25772730	25772926	CD4_unstim_ND517	5	4.95747	2.57264	CD4_unstim
OCR_1428	chr1	25793718	25794012	CD4_unstim_ND517	9	5.95905	2.72708	CD4_unstim
OCR_1429	chr1	25794131	25794409	CD4_unstim_ND517	7	4.90061	2.48561	CD4_unstim
OCR_1430	chr1	25795703	25796144	CD4_unstim_ND517	2	0.88382	0.406787	CD4_unstim
OCR_1431	chr1	25799114	25799304	CD4_unstim_ND517	4	4.09056	2.35423	CD4_unstim
OCR_1432	chr1	25800038	25800663	CD4_unstim_ND517	8	2.49616	1.48963	CD4_unstim
OCR_1433	chr1	25800970	25801462	CD4_unstim_ND517	22	8.7163	3.18785	CD4_unstim
OCR_1434	chr1	25813170	25813380	CD4_unstim_ND517	3	2.77712	1.88863	CD4_unstim
OCR_1435	chr1	25814177	25814355	CD4_unstim_ND517	4	4.36479	2.44784	CD4_unstim
OCR_1436	chr1	25830348	25830621	CD4_unstim_ND517	21	14.9701	3.97113	CD4_unstim
OCR_1437	chr1	25832685	25833039	CD4_unstim_ND517	2	1.10042	0.723015	CD4_unstim
OCR_1438	chr1	25833116	25833277	CD4_unstim_ND517	5	6.02853	2.85484	CD4_unstim
OCR_1439	chr1	25833337	25833834	CD4_unstim_ND517	27	10.5899	3.45708	CD4_unstim
OCR_1440	chr1	25846854	25847459	CD4_unstim_ND517	6	1.9339	1.17391	CD4_unstim
OCR_1441	chr1	25869770	25871441	CD4_unstim_ND517	32	3.73826	1.94676	CD4_unstim
OCR_1442	chr1	25875888	25876984	CD4_unstim_ND517	64	11.3954	3.53275	CD4_unstim
OCR_1443	chr1	25878998	25879181	CD4_unstim_ND517	7	7.43082	3.08617	CD4_unstim
OCR_1444	chr1	25883213	25883663	CD4_unstim_ND517	10	4.33092	2.25218	CD4_unstim
OCR_1445	chr1	25886516	25886720	CD4_unstim_ND517	7	6.66961	2.93025	CD4_unstim
OCR_1446	chr1	25887949	25888507	CD4_unstim_ND517	26	9.08485	3.23791	CD4_unstim
OCR_1447	chr1	25888782	25889402	CD4_unstim_ND517	135	42.4618	5.41874	CD4_unstim
OCR_1448	chr1	25889829	25890111	CD4_unstim_ND517	11	7.59211	3.05003	CD4_unstim
OCR_1449	chr1	25891854	25892149	CD4_unstim_ND517	32	21.1161	4.44467	CD4_unstim
OCR_1450	chr1	25899024	25899736	CD4_unstim_ND517	14	3.83526	2.03886	CD4_unstim
OCR_1451	chr1	25903951	25904254	CD4_unstim_ND517	6	3.85508	2.16915	CD4_unstim
OCR_1452	chr1	25917093	25917293	CD4_unstim_ND517	6	5.83058	2.76603	CD4_unstim
OCR_1453	chr1	25934949	25935410	CD4_unstim_ND517	26	10.9923	3.51287	CD4_unstim
OCR_1454	chr1	25941626	25941832	CD4_unstim_ND517	3	2.83079	1.91624	CD4_unstim
OCR_1455	chr1	25942319	25942582	CD4_unstim_ND517	13	9.61824	3.37269	CD4_unstim
OCR_1456	chr1	25942647	25944121	CD4_unstim_ND517	121	16.0232	4.01397	CD4_unstim
OCR_1457	chr1	25945626	25945838	CD4_unstim_ND517	17	15.5893	4.04494	CD4_unstim
OCR_1458	chr1	25949091	25949416	CD4_unstim_ND517	15	8.98731	3.261	CD4_unstim
OCR_1459	chr1	25949645	25950031	CD4_unstim_ND517	10	5.04714	2.47297	CD4_unstim
OCR_1460	chr1	25950773	25950968	CD4_unstim_ND517	9	8.96897	3.31695	CD4_unstim
OCR_1461	chr1	25955434	25956171	CD4_unstim_ND517	10	2.64667	1.54168	CD4_unstim
OCR_1462	chr1	25958264	25959152	CD4_unstim_ND517	12	2.63655	1.51413	CD4_unstim
OCR_1463	chr1	25968587	25969657	CD4_unstim_ND517	77	14.0429	3.83039	CD4_unstim
OCR_1464	chr1	25983289	25983517	CD4_unstim_ND517	3	2.55883	1.77052	CD4_unstim
OCR_1465	chr1	25983584	25984153	CD4_unstim_ND517	10	3.42674	1.91434	CD4_unstim
OCR_1466	chr1	25993332	25993520	CD4_unstim_ND517	4	4.13385	2.36941	CD4_unstim
OCR_1467	chr1	25993873	25994126	CD4_unstim_ND517	4	3.07597	1.94297	CD4_unstim
OCR_1468	chr1	25994198	25994473	CD4_unstim_ND517	2	1.41539	1.08617	CD4_unstim
OCR_1469	chr1	25995309	25995781	CD4_unstim_ND517	10	4.12948	2.18346	CD4_unstim
OCR_1470	chr1	26002304	26003367	CD4_unstim_ND517	113	20.744	4.38734	CD4_unstim
OCR_1471	chr1	26003713	26004055	CD4_unstim_ND517	12	6.8335	2.8881	CD4_unstim
OCR_1472	chr1	26016563	26016841	CD4_unstim_ND517	12	8.40104	3.18605	CD4_unstim
OCR_1473	chr1	26019156	26019392	CD4_unstim_ND517	6	4.94492	2.52834	CD4_unstim
OCR_1474	chr1	26022255	26022738	CD4_unstim_ND517	2	0.807125	0.275827	CD4_unstim
OCR_1475	chr1	26023661	26023824	CD4_unstim_ND517	0	0	0.252176	CD4_unstim
OCR_1476	chr1	26024288	26024773	CD4_unstim_ND517	31	12.459	3.68492	CD4_unstim
OCR_1477	chr1	26024951	26025172	CD4_unstim_ND517	3	2.63952	1.81531	CD4_unstim
OCR_1478	chr1	26030103	26031352	CD4_unstim_ND517	25	3.90649	2.02245	CD4_unstim
OCR_1479	chr1	26037133	26037536	CD4_unstim_ND517	1	0.483476	-0.0484839	CD4_unstim
OCR_1480	chr1	26038034	26038356	CD4_unstim_ND517	16	9.67551	3.3618	CD4_unstim
OCR_1481	chr1	26054880	26055194	CD4_unstim_ND517	4	2.48031	1.63245	CD4_unstim
OCR_1482	chr1	26056904	26057604	CD4_unstim_ND517	8	2.22909	1.32638	CD4_unstim
OCR_1483	chr1	26065052	26065232	CD4_unstim_ND517	2	2.15828	1.69484	CD4_unstim
OCR_1484	chr1	26081103	26082138	CD4_unstim_ND517	39	7.35294	2.91485	CD4_unstim
OCR_1485	chr1	26082511	26082959	CD4_unstim_ND517	4	1.74008	1.12108	CD4_unstim
OCR_1486	chr1	26091914	26092096	CD4_unstim_ND517	3	3.20204	2.09403	CD4_unstim
OCR_1487	chr1	26092586	26093112	CD4_unstim_ND517	18	6.67142	2.816	CD4_unstim
OCR_1488	chr1	26097099	26097406	CD4_unstim_ND517	6	3.80502	2.1503	CD4_unstim
OCR_1489	chr1	26097824	26098118	CD4_unstim_ND517	25	16.5529	4.1056	CD4_unstim
OCR_1490	chr1	26101194	26102315	CD4_unstim_ND517	264	45.9587	5.52772	CD4_unstim
OCR_1491	chr1	26122477	26122774	CD4_unstim_ND517	6	3.9327	2.19791	CD4_unstim
OCR_1492	chr1	26122844	26123664	CD4_unstim_ND517	80	19.0328	4.26834	CD4_unstim
OCR_1493	chr1	26126297	26127188	CD4_unstim_ND517	34	7.4451	2.93811	CD4_unstim
OCR_1494	chr1	26137046	26137647	CD4_unstim_ND517	12	3.89351	2.07655	CD4_unstim
OCR_1495	chr1	26146029	26147619	CD4_unstim_ND517	252	30.9376	4.957	CD4_unstim
OCR_1496	chr1	26158334	26158608	CD4_unstim_ND517	7	4.97189	2.50644	CD4_unstim
OCR_1497	chr1	26185449	26186841	CD4_unstim_ND517	75	10.5164	3.41368	CD4_unstim
OCR_1498	chr1	26201142	26202816	CD4_unstim_ND517	65	7.57975	2.94418	CD4_unstim
OCR_1499	chr1	26221856	26222348	CD4_unstim_ND517	40	15.8478	4.02184	CD4_unstim
OCR_1500	chr1	26231521	26231757	CD4_unstim_ND517	60	49.4492	5.65172	CD4_unstim
OCR_1501	chr1	26231890	26233187	CD4_unstim_ND517	185	27.839	4.80681	CD4_unstim
OCR_1502	chr1	26233343	26233611	CD4_unstim_ND517	28	20.3312	4.39625	CD4_unstim
OCR_1503	chr1	26244568	26244817	CD4_unstim_ND517	4	3.12519	1.96587	CD4_unstim
OCR_1504	chr1	26248838	26250070	CD4_unstim_ND517	41	6.49497	2.73409	CD4_unstim
OCR_1505	chr1	26250120	26250369	CD4_unstim_ND517	3	2.34389	1.64394	CD4_unstim
OCR_1506	chr1	26297504	26298862	CD4_unstim_ND517	29	4.16807	2.10829	CD4_unstim
OCR_1507	chr1	26316375	26317898	CD4_unstim_ND517	33	4.22946	2.12354	CD4_unstim
OCR_1508	chr1	26323489	26324025	CD4_unstim_ND517	15	5.45599	2.54095	CD4_unstim
OCR_1509	chr1	26324087	26325285	CD4_unstim_ND517	171	27.8569	4.80838	CD4_unstim
OCR_1510	chr1	26342941	26343233	CD4_unstim_ND517	4	2.66654	1.7369	CD4_unstim
OCR_1511	chr1	26343338	26343979	CD4_unstim_ND517	22	6.69336	2.80686	CD4_unstim
OCR_1512	chr1	26354239	26354503	CD4_unstim_ND517	1	0.737073	0.559879	CD4_unstim
OCR_1513	chr1	26361609	26363057	CD4_unstim_ND517	125	16.8499	4.08617	CD4_unstim
OCR_1514	chr1	26437120	26439126	CD4_unstim_ND517	181	17.6152	4.1467	CD4_unstim
OCR_1515	chr1	26449758	26449911	CD4_unstim_ND517	0	0	0.342941	CD4_unstim
OCR_1516	chr1	26450019	26450215	CD4_unstim_ND517	0	0	-0.0123243	CD4_unstim
OCR_1517	chr1	26452808	26453438	CD4_unstim_ND517	104	32.1929	5.02248	CD4_unstim
OCR_1518	chr1	26453733	26454101	CD4_unstim_ND517	2	1.05867	0.667213	CD4_unstim
OCR_1519	chr1	26465543	26465781	CD4_unstim_ND517	5	4.08628	2.29382	CD4_unstim
OCR_1520	chr1	26471503	26472084	CD4_unstim_ND517	13	4.36291	2.23221	CD4_unstim
OCR_1521	chr1	26487853	26488797	CD4_unstim_ND517	12	2.48031	1.426	CD4_unstim
OCR_1522	chr1	26490566	26491154	CD4_unstim_ND517	15	4.9743	2.4076	CD4_unstim
OCR_1523	chr1	26496018	26497322	CD4_unstim_ND517	48	7.18434	2.8746	CD4_unstim
OCR_1524	chr1	26503846	26504035	CD4_unstim_ND517	4	4.11209	2.3618	CD4_unstim
OCR_1525	chr1	26508067	26508410	CD4_unstim_ND517	0	0	-0.816537	CD4_unstim
OCR_1526	chr1	26518215	26518517	CD4_unstim_ND517	2	1.28927	0.951516	CD4_unstim
OCR_1527	chr1	26527422	26528140	CD4_unstim_ND517	8	2.17329	1.2898	CD4_unstim
OCR_1528	chr1	26528423	26528913	CD4_unstim_ND517	35	13.9233	3.84007	CD4_unstim
OCR_1529	chr1	26551542	26552424	CD4_unstim_ND517	21	4.64531	2.28289	CD4_unstim
OCR_1530	chr1	26560267	26561829	CD4_unstim_ND517	262	32.7415	5.03854	CD4_unstim
OCR_1531	chr1	26591971	26592202	CD4_unstim_ND517	1	0.841915	0.751747	CD4_unstim
OCR_1532	chr1	26602086	26602359	CD4_unstim_ND517	13	9.26721	3.31905	CD4_unstim
OCR_1533	chr1	26602452	26603084	CD4_unstim_ND517	19	5.86281	2.62559	CD4_unstim
OCR_1534	chr1	26605387	26605727	CD4_unstim_ND517	3	1.7184	1.1961	CD4_unstim
OCR_1535	chr1	26606110	26606740	CD4_unstim_ND517	93	28.7879	4.86282	CD4_unstim
OCR_1536	chr1	26611038	26611866	CD4_unstim_ND517	85	20.0272	4.34076	CD4_unstim
OCR_1537	chr1	26613753	26614241	CD4_unstim_ND517	86	34.3515	5.11898	CD4_unstim
OCR_1538	chr1	26615052	26615479	CD4_unstim_ND517	13	5.93275	2.67562	CD4_unstim
OCR_1539	chr1	26615623	26615872	CD4_unstim_ND517	16	12.5008	3.73141	CD4_unstim
OCR_1540	chr1	26632831	26634330	CD4_unstim_ND517	131	17.0583	4.10337	CD4_unstim
OCR_1541	chr1	26641795	26642175	CD4_unstim_ND517	16	8.20259	3.12354	CD4_unstim
OCR_1542	chr1	26644217	26644880	CD4_unstim_ND517	60	17.6498	4.16543	CD4_unstim
OCR_1543	chr1	26645077	26645502	CD4_unstim_ND517	4	1.83403	1.19695	CD4_unstim
OCR_1544	chr1	26645861	26646413	CD4_unstim_ND517	12	4.2385	2.19903	CD4_unstim
OCR_1545	chr1	26647871	26648338	CD4_unstim_ND517	28	11.6861	3.59734	CD4_unstim
OCR_1546	chr1	26662419	26663614	CD4_unstim_ND517	44	7.18584	2.87758	CD4_unstim
OCR_1547	chr1	26685232	26685897	CD4_unstim_ND517	38	11.1446	3.51575	CD4_unstim
OCR_1548	chr1	26686767	26687112	CD4_unstim_ND517	6	3.38713	1.98245	CD4_unstim
OCR_1549	chr1	26690308	26690771	CD4_unstim_ND517	13	5.47245	2.5591	CD4_unstim
OCR_1550	chr1	26698610	26698803	CD4_unstim_ND517	3	3.02048	2.00981	CD4_unstim
OCR_1551	chr1	26699841	26700094	CD4_unstim_ND517	8	6.15195	2.79097	CD4_unstim
OCR_1552	chr1	26701554	26701811	CD4_unstim_ND517	6	4.54243	2.40586	CD4_unstim
OCR_1553	chr1	26704609	26705311	CD4_unstim_ND517	70	19.4491	4.30209	CD4_unstim
OCR_1554	chr1	26722820	26723089	CD4_unstim_ND517	4	2.89369	1.85484	CD4_unstim
OCR_1555	chr1	26735096	26735354	CD4_unstim_ND517	12	9.04977	3.29336	CD4_unstim
OCR_1556	chr1	26743446	26743986	CD4_unstim_ND517	22	7.94295	3.0538	CD4_unstim
OCR_1557	chr1	26758334	26759334	CD4_unstim_ND517	105	20.4886	4.37042	CD4_unstim
OCR_1558	chr1	26798042	26799825	CD4_unstim_ND517	176	19.2697	4.27643	CD4_unstim
OCR_1559	chr1	26826539	26828193	CD4_unstim_ND517	162	19.1194	4.26584	CD4_unstim
OCR_1560	chr1	26855747	26857173	CD4_unstim_ND517	38	5.20135	2.41636	CD4_unstim
OCR_1561	chr1	26868366	26869082	CD4_unstim_ND517	68	18.5245	4.23242	CD4_unstim
OCR_1562	chr1	26871936	26872749	CD4_unstim_ND517	128	30.7144	4.95207	CD4_unstim
OCR_1563	chr1	26872925	26873130	CD4_unstim_ND517	4	3.7927	2.24516	CD4_unstim
OCR_1564	chr1	26896824	26897037	CD4_unstim_ND517	2	1.82546	1.45322	CD4_unstim
OCR_1565	chr1	26906654	26906867	CD4_unstim_ND517	0	0	-0.131739	CD4_unstim
OCR_1566	chr1	26907259	26908091	CD4_unstim_ND517	4	0.937932	0.229483	CD4_unstim
OCR_1567	chr1	26909263	26909718	CD4_unstim_ND517	3	1.28503	0.776838	CD4_unstim
OCR_1568	chr1	26924125	26924425	CD4_unstim_ND517	3	1.94675	1.37611	CD4_unstim
OCR_1569	chr1	26946535	26948179	CD4_unstim_ND517	174	20.6604	4.37707	CD4_unstim
OCR_1570	chr1	26993387	26993651	CD4_unstim_ND517	0	0	-0.440121	CD4_unstim
OCR_1571	chr1	27003783	27004601	CD4_unstim_ND517	15	3.57737	1.93201	CD4_unstim
OCR_1572	chr1	27018718	27019195	CD4_unstim_ND517	63	25.7436	4.70886	CD4_unstim
OCR_1573	chr1	27019465	27019840	CD4_unstim_ND517	58	30.1298	4.93778	CD4_unstim
OCR_1574	chr1	27021790	27022991	CD4_unstim_ND517	150	24.3749	4.61691	CD4_unstim
OCR_1575	chr1	27023362	27024231	CD4_unstim_ND517	58	13.0216	3.7275	CD4_unstim
OCR_1576	chr1	27024673	27024897	CD4_unstim_ND517	19	16.4941	4.11787	CD4_unstim
OCR_1577	chr1	27029194	27029476	CD4_unstim_ND517	3	2.07058	1.46507	CD4_unstim
OCR_1578	chr1	27039669	27039881	CD4_unstim_ND517	0	0	-0.124982	CD4_unstim
OCR_1579	chr1	27048204	27048579	CD4_unstim_ND517	9	4.67532	2.37707	CD4_unstim
OCR_1580	chr1	27049839	27050487	CD4_unstim_ND517	12	3.61154	1.96809	CD4_unstim
OCR_1581	chr1	27059907	27060201	CD4_unstim_ND517	1	0.662116	0.405156	CD4_unstim
OCR_1582	chr1	27065585	27066281	CD4_unstim_ND517	14	3.9233	2.0716	CD4_unstim
OCR_1583	chr1	27070493	27071466	CD4_unstim_ND517	70	14.0377	3.8317	CD4_unstim
OCR_1584	chr1	27098240	27098528	CD4_unstim_ND517	2	1.35173	1.01976	CD4_unstim
OCR_1585	chr1	27113717	27115310	CD4_unstim_ND517	146	17.8904	4.17096	CD4_unstim
OCR_1586	chr1	27115368	27115936	CD4_unstim_ND517	23	7.89536	3.04241	CD4_unstim
OCR_1587	chr1	27125329	27125538	CD4_unstim_ND517	0	0	-0.104518	CD4_unstim
OCR_1588	chr1	27126054	27127314	CD4_unstim_ND517	16	2.47834	1.39684	CD4_unstim
OCR_1589	chr1	27136573	27137005	CD4_unstim_ND517	9	4.05986	2.17343	CD4_unstim
OCR_1590	chr1	27147244	27147793	CD4_unstim_ND517	25	8.87838	3.20688	CD4_unstim
OCR_1591	chr1	27152647	27154004	CD4_unstim_ND517	64	9.20527	3.22483	CD4_unstim
OCR_1592	chr1	27154596	27154807	CD4_unstim_ND517	3	2.76402	1.88181	CD4_unstim
OCR_1593	chr1	27154963	27155242	CD4_unstim_ND517	4	2.79035	1.80237	CD4_unstim
OCR_1594	chr1	27159712	27160606	CD4_unstim_ND517	141	30.7718	4.95373	CD4_unstim
OCR_1595	chr1	27179629	27179911	CD4_unstim_ND517	9	6.21173	2.787	CD4_unstim
OCR_1596	chr1	27191092	27192511	CD4_unstim_ND517	222	30.5366	4.93895	CD4_unstim
OCR_1597	chr1	27204511	27204752	CD4_unstim_ND517	8	6.457	2.86079	CD4_unstim
OCR_1598	chr1	27216012	27217295	CD4_unstim_ND517	66	10.04	3.34939	CD4_unstim
OCR_1599	chr1	27226259	27227631	CD4_unstim_ND517	43	6.11722	2.64604	CD4_unstim
OCR_1600	chr1	27247721	27248931	CD4_unstim_ND517	210	33.8713	5.08884	CD4_unstim
OCR_1601	chr1	27275901	27276214	CD4_unstim_ND517	0	0	-0.684893	CD4_unstim
OCR_1602	chr1	27286151	27287580	CD4_unstim_ND517	42	5.7368	2.55419	CD4_unstim
OCR_1603	chr1	27293461	27293694	CD4_unstim_ND517	4	3.33888	2.06129	CD4_unstim
OCR_1604	chr1	27317859	27318361	CD4_unstim_ND517	8	3.10655	1.80524	CD4_unstim
OCR_1605	chr1	27319756	27320923	CD4_unstim_ND517	47	7.8598	3.00487	CD4_unstim
OCR_1606	chr1	27324166	27324635	CD4_unstim_ND517	29	12.0519	3.6401	CD4_unstim
OCR_1607	chr1	27328287	27328624	CD4_unstim_ND517	7	4.04518	2.20885	CD4_unstim
OCR_1608	chr1	27338787	27339882	CD4_unstim_ND517	27	4.81182	2.31905	CD4_unstim
OCR_1609	chr1	27371075	27371677	CD4_unstim_ND517	20	6.47842	2.76603	CD4_unstim
OCR_1610	chr1	27371777	27372025	CD4_unstim_ND517	5	3.92217	2.23469	CD4_unstim
OCR_1611	chr1	27372276	27372709	CD4_unstim_ND517	6	2.70034	1.65553	CD4_unstim
OCR_1612	chr1	27423914	27424399	CD4_unstim_ND517	8	3.21521	1.85484	CD4_unstim
OCR_1613	chr1	27429147	27429645	CD4_unstim_ND517	10	3.91431	2.10626	CD4_unstim
OCR_1614	chr1	27438215	27439117	CD4_unstim_ND517	58	12.5457	3.67379	CD4_unstim
OCR_1615	chr1	27440335	27440705	CD4_unstim_ND517	5	2.6324	1.65941	CD4_unstim
OCR_1616	chr1	27462529	27462985	CD4_unstim_ND517	4	1.70962	1.09561	CD4_unstim
OCR_1617	chr1	27463354	27464312	CD4_unstim_ND517	57	11.6095	3.56232	CD4_unstim
OCR_1618	chr1	27468913	27469581	CD4_unstim_ND517	13	3.79554	2.03122	CD4_unstim
OCR_1619	chr1	27481148	27482302	CD4_unstim_ND517	121	20.4625	4.36679	CD4_unstim
OCR_1620	chr1	27487965	27488531	CD4_unstim_ND517	41	14.124	3.85484	CD4_unstim
OCR_1621	chr1	27524309	27524912	CD4_unstim_ND517	10	3.23385	1.83075	CD4_unstim
OCR_1622	chr1	27560138	27562221	CD4_unstim_ND517	268	25.1185	4.65605	CD4_unstim
OCR_1623	chr1	27579154	27579808	CD4_unstim_ND517	3	0.894615	0.254376	CD4_unstim
OCR_1624	chr1	27580058	27580455	CD4_unstim_ND517	1	0.490765	-0.0268971	CD4_unstim
OCR_1625	chr1	27585101	27585486	CD4_unstim_ND517	17	8.60237	3.1872	CD4_unstim
OCR_1626	chr1	27611049	27611476	CD4_unstim_ND517	9	4.10729	2.19019	CD4_unstim
OCR_1627	chr1	27623223	27623432	CD4_unstim_ND517	6	5.58069	2.70284	CD4_unstim
OCR_1628	chr1	27626991	27627630	CD4_unstim_ND517	20	6.10388	2.68012	CD4_unstim
OCR_1629	chr1	27648327	27649235	CD4_unstim_ND517	146	31.3722	4.98126	CD4_unstim
OCR_1630	chr1	27659167	27659576	CD4_unstim_ND517	8	3.81121	2.10017	CD4_unstim
OCR_1631	chr1	27668016	27668767	CD4_unstim_ND517	58	15.0649	3.93778	CD4_unstim
OCR_1632	chr1	27668824	27669317	CD4_unstim_ND517	30	11.8618	3.61556	CD4_unstim
OCR_1633	chr1	27669384	27670467	CD4_unstim_ND517	76	13.6943	3.79437	CD4_unstim
OCR_1634	chr1	27675577	27676600	CD4_unstim_ND517	24	4.57791	2.25358	CD4_unstim
OCR_1635	chr1	27682982	27683309	CD4_unstim_ND517	5	2.9775	1.83714	CD4_unstim
OCR_1636	chr1	27683384	27683725	CD4_unstim_ND517	11	6.28236	2.77684	CD4_unstim
OCR_1637	chr1	27683772	27684334	CD4_unstim_ND517	58	20.1222	4.35538	CD4_unstim
OCR_1638	chr1	27686512	27687393	CD4_unstim_ND517	32	7.0866	2.86949	CD4_unstim
OCR_1639	chr1	27691777	27693165	CD4_unstim_ND517	86	12.0935	3.61284	CD4_unstim
OCR_1640	chr1	27693370	27693700	CD4_unstim_ND517	14	8.26145	3.14593	CD4_unstim
OCR_1641	chr1	27709615	27710008	CD4_unstim_ND517	12	5.94896	2.68812	CD4_unstim
OCR_1642	chr1	27718133	27719471	CD4_unstim_ND517	96	14.0038	3.8227	CD4_unstim
OCR_1643	chr1	27721885	27722188	CD4_unstim_ND517	26	16.7054	4.11669	CD4_unstim
OCR_1644	chr1	27728798	27729316	CD4_unstim_ND517	16	6.02156	2.6776	CD4_unstim
OCR_1645	chr1	27729335	27730351	CD4_unstim_ND517	25	4.80148	2.32006	CD4_unstim
OCR_1646	chr1	27743078	27743309	CD4_unstim_ND517	4	3.36766	2.07367	CD4_unstim
OCR_1647	chr1	27748502	27749164	CD4_unstim_ND517	39	11.4897	3.55879	CD4_unstim
OCR_1648	chr1	27753921	27754112	CD4_unstim_ND517	4	4.06926	2.34669	CD4_unstim
OCR_1649	chr1	27754809	27755818	CD4_unstim_ND517	16	3.09425	1.71705	CD4_unstim
OCR_1650	chr1	27757434	27757995	CD4_unstim_ND517	29	10.079	3.38219	CD4_unstim
OCR_1651	chr1	27762422	27763340	CD4_unstim_ND517	29	6.16366	2.6727	CD4_unstim
OCR_1652	chr1	27770559	27770806	CD4_unstim_ND517	2	1.5752	1.24049	CD4_unstim
OCR_1653	chr1	27771723	27772492	CD4_unstim_ND517	7	1.77568	1.02101	CD4_unstim
OCR_1654	chr1	27781812	27782475	CD4_unstim_ND517	17	5.00077	2.40461	CD4_unstim
OCR_1655	chr1	27782701	27783040	CD4_unstim_ND517	3	1.72345	1.20034	CD4_unstim
OCR_1656	chr1	27795978	27796214	CD4_unstim_ND517	1	0.824153	0.720984	CD4_unstim
OCR_1657	chr1	27800359	27800656	CD4_unstim_ND517	6	3.9327	2.19791	CD4_unstim
OCR_1658	chr1	27802647	27803034	CD4_unstim_ND517	2	1.00683	0.594777	CD4_unstim
OCR_1659	chr1	27808452	27808801	CD4_unstim_ND517	3	1.67421	1.15852	CD4_unstim
OCR_1660	chr1	27816129	27817387	CD4_unstim_ND517	161	24.9779	4.65151	CD4_unstim
OCR_1661	chr1	27847871	27849967	CD4_unstim_ND517	133	12.3882	3.64171	CD4_unstim
OCR_1662	chr1	27851970	27852321	CD4_unstim_ND517	23	12.7627	3.73526	CD4_unstim
OCR_1663	chr1	27852511	27852751	CD4_unstim_ND517	19	15.399	4.01877	CD4_unstim
OCR_1664	chr1	27853649	27853956	CD4_unstim_ND517	19	12.0492	3.66487	CD4_unstim
OCR_1665	chr1	27854562	27855099	CD4_unstim_ND517	41	14.8853	3.93058	CD4_unstim
OCR_1666	chr1	27868960	27869294	CD4_unstim_ND517	1	0.583058	0.22171	CD4_unstim
OCR_1667	chr1	27882564	27884104	CD4_unstim_ND517	25	3.16879	1.72052	CD4_unstim
OCR_1668	chr1	27894640	27896153	CD4_unstim_ND517	146	18.8358	4.24525	CD4_unstim
OCR_1669	chr1	27901784	27902809	CD4_unstim_ND517	14	2.66524	1.5138	CD4_unstim
OCR_1670	chr1	27921595	27921977	CD4_unstim_ND517	1	0.509985	0.028527	CD4_unstim
OCR_1671	chr1	27923610	27923906	CD4_unstim_ND517	11	7.23423	2.98037	CD4_unstim
OCR_1672	chr1	27925703	27926098	CD4_unstim_ND517	7	3.4527	1.98037	CD4_unstim
OCR_1673	chr1	27929528	27931033	CD4_unstim_ND517	105	13.6182	3.78114	CD4_unstim
OCR_1674	chr1	27935240	27935421	CD4_unstim_ND517	8	8.58568	3.27186	CD4_unstim
OCR_1675	chr1	27935699	27935886	CD4_unstim_ND517	4	4.15584	2.37707	CD4_unstim
OCR_1676	chr1	27936186	27936591	CD4_unstim_ND517	5	2.40547	1.52935	CD4_unstim
OCR_1677	chr1	27940588	27940796	CD4_unstim_ND517	9	8.41109	3.2243	CD4_unstim
OCR_1678	chr1	27944663	27945575	CD4_unstim_ND517	32	6.84598	2.81965	CD4_unstim
OCR_1679	chr1	27951113	27951354	CD4_unstim_ND517	2	1.61425	1.27583	CD4_unstim
OCR_1680	chr1	27951417	27952090	CD4_unstim_ND517	7	2.02859	1.21312	CD4_unstim
OCR_1681	chr1	27958768	27959277	CD4_unstim_ND517	13	4.97885	2.42273	CD4_unstim
OCR_1682	chr1	27959359	27959737	CD4_unstim_ND517	8	4.12294	2.2136	CD4_unstim
OCR_1683	chr1	27960664	27961122	CD4_unstim_ND517	14	5.9576	2.67427	CD4_unstim
OCR_1684	chr1	27963169	27963388	CD4_unstim_ND517	9	7.99054	3.1503	CD4_unstim
OCR_1685	chr1	27963573	27963886	CD4_unstim_ND517	4	2.48821	1.63703	CD4_unstim
OCR_1686	chr1	27970273	27970882	CD4_unstim_ND517	29	9.28591	3.26395	CD4_unstim
OCR_1687	chr1	27977064	27977335	CD4_unstim_ND517	1	0.718104	0.522265	CD4_unstim
OCR_1688	chr1	27985683	27986889	CD4_unstim_ND517	82	13.2698	3.74756	CD4_unstim
OCR_1689	chr1	27987008	27987169	CD4_unstim_ND517	6	7.23423	3.07723	CD4_unstim
OCR_1690	chr1	27989097	27989976	CD4_unstim_ND517	89	19.7544	4.32022	CD4_unstim
OCR_1691	chr1	27995710	27996190	CD4_unstim_ND517	23	9.33983	3.2848	CD4_unstim
OCR_1692	chr1	27998304	27999267	CD4_unstim_ND517	75	15.1964	3.94477	CD4_unstim
OCR_1693	chr1	28046180	28046369	CD4_unstim_ND517	6	6.16814	2.84723	CD4_unstim
OCR_1694	chr1	28051915	28053097	CD4_unstim_ND517	421	69.511	6.12259	CD4_unstim
OCR_1695	chr1	28099167	28100535	CD4_unstim_ND517	213	30.3901	4.93229	CD4_unstim
OCR_1696	chr1	28156692	28157987	CD4_unstim_ND517	75	11.3035	3.51781	CD4_unstim
OCR_1697	chr1	28184371	28185345	CD4_unstim_ND517	28	5.60931	2.53845	CD4_unstim
OCR_1698	chr1	28189655	28190058	CD4_unstim_ND517	6	2.90086	1.75887	CD4_unstim
OCR_1699	chr1	28190662	28191266	CD4_unstim_ND517	11	3.55135	1.9539	CD4_unstim
OCR_1700	chr1	28195436	28196063	CD4_unstim_ND517	75	23.3269	4.56303	CD4_unstim
OCR_1701	chr1	28198726	28200104	CD4_unstim_ND517	83	11.7563	3.57264	CD4_unstim
OCR_1702	chr1	28213318	28214502	CD4_unstim_ND517	70	11.5381	3.5488	CD4_unstim
OCR_1703	chr1	28214610	28214969	CD4_unstim_ND517	14	7.59594	3.02477	CD4_unstim
OCR_1704	chr1	28218028	28218437	CD4_unstim_ND517	14	6.66961	2.83714	CD4_unstim
OCR_1705	chr1	28240413	28241704	CD4_unstim_ND517	214	32.3525	5.02253	CD4_unstim
OCR_1706	chr1	28261332	28261666	CD4_unstim_ND517	5	2.91529	1.80667	CD4_unstim
OCR_1707	chr1	28266769	28267494	CD4_unstim_ND517	21	5.64988	2.56533	CD4_unstim
OCR_1708	chr1	28269952	28270364	CD4_unstim_ND517	36	17.0258	4.12918	CD4_unstim
OCR_1709	chr1	28285942	28287091	CD4_unstim_ND517	129	21.9103	4.46468	CD4_unstim
OCR_1710	chr1	28306186	28306447	CD4_unstim_ND517	5	3.72756	2.16127	CD4_unstim
OCR_1711	chr1	28318648	28319246	CD4_unstim_ND517	28	9.13035	3.2413	CD4_unstim
OCR_1712	chr1	28319821	28320208	CD4_unstim_ND517	8	4.0273	2.17974	CD4_unstim
OCR_1713	chr1	28322963	28323166	CD4_unstim_ND517	2	1.91494	1.52226	CD4_unstim
OCR_1714	chr1	28382556	28383324	CD4_unstim_ND517	7	1.77798	1.02289	CD4_unstim
OCR_1715	chr1	28385812	28386101	CD4_unstim_ND517	3	2.0206	1.42982	CD4_unstim
OCR_1716	chr1	28388997	28389310	CD4_unstim_ND517	1	0.622052	0.315107	CD4_unstim
OCR_1717	chr1	28389368	28389804	CD4_unstim_ND517	4	1.78787	1.16017	CD4_unstim
OCR_1718	chr1	28414225	28415645	CD4_unstim_ND517	135	18.5565	4.2245	CD4_unstim
OCR_1719	chr1	28417798	28417975	CD4_unstim_ND517	6	6.58396	2.94135	CD4_unstim
OCR_1720	chr1	28441859	28442139	CD4_unstim_ND517	0	0	-0.524699	CD4_unstim
OCR_1721	chr1	28471042	28471525	CD4_unstim_ND517	1	0.403563	-0.309136	CD4_unstim
OCR_1722	chr1	28495722	28496311	CD4_unstim_ND517	30	9.93174	3.35935	CD4_unstim
OCR_1723	chr1	28498463	28498643	CD4_unstim_ND517	5	5.3957	2.69484	CD4_unstim
OCR_1724	chr1	28499207	28499453	CD4_unstim_ND517	10	7.90787	3.12079	CD4_unstim
OCR_1725	chr1	28525851	28526972	CD4_unstim_ND517	48	8.35612	3.09258	CD4_unstim
OCR_1726	chr1	28535439	28535678	CD4_unstim_ND517	3	2.44155	1.70284	CD4_unstim
OCR_1727	chr1	28559064	28559686	CD4_unstim_ND517	31	9.71919	3.32664	CD4_unstim
OCR_1728	chr1	28562356	28563616	CD4_unstim_ND517	132	20.4463	4.36466	CD4_unstim
OCR_1729	chr1	28570658	28570913	CD4_unstim_ND517	12	9.15583	3.31017	CD4_unstim
OCR_1730	chr1	28572869	28573330	CD4_unstim_ND517	130	54.9614	5.7914	CD4_unstim
OCR_1731	chr1	28573394	28573560	CD4_unstim_ND517	76	88.8901	6.49281	CD4_unstim
OCR_1732	chr1	28573617	28574091	CD4_unstim_ND517	286	117.606	6.88285	CD4_unstim
OCR_1733	chr1	28575040	28575300	CD4_unstim_ND517	32	23.9478	4.62622	CD4_unstim
OCR_1734	chr1	28575540	28575764	CD4_unstim_ND517	29	25.1751	4.70284	CD4_unstim
OCR_1735	chr1	28582842	28583070	CD4_unstim_ND517	15	12.7942	3.77052	CD4_unstim
OCR_1736	chr1	28585570	28587094	CD4_unstim_ND517	140	17.9314	4.17469	CD4_unstim
OCR_1737	chr1	28655118	28656347	CD4_unstim_ND517	78	12.3864	3.64907	CD4_unstim
OCR_1738	chr1	28686238	28686515	CD4_unstim_ND517	6	4.21563	2.29814	CD4_unstim
OCR_1739	chr1	28695843	28696877	CD4_unstim_ND517	63	11.8893	3.59431	CD4_unstim
OCR_1740	chr1	28696943	28697159	CD4_unstim_ND517	6	5.40067	2.65553	CD4_unstim
OCR_1741	chr1	28736333	28736583	CD4_unstim_ND517	4	3.11274	1.96011	CD4_unstim
OCR_1742	chr1	28743951	28744369	CD4_unstim_ND517	3	1.3985	0.898921	CD4_unstim
OCR_1743	chr1	28764401	28765024	CD4_unstim_ND517	4	1.25208	0.646253	CD4_unstim
OCR_1744	chr1	28765440	28765642	CD4_unstim_ND517	1	0.962189	0.944392	CD4_unstim
OCR_1745	chr1	28765917	28766139	CD4_unstim_ND517	2	1.75179	1.39379	CD4_unstim
OCR_1746	chr1	28776250	28776908	CD4_unstim_ND517	10	2.96395	1.70502	CD4_unstim
OCR_1747	chr1	28782599	28783079	CD4_unstim_ND517	2	0.812159	0.284797	CD4_unstim
OCR_1748	chr1	28798021	28798309	CD4_unstim_ND517	1	0.675863	0.434802	CD4_unstim
OCR_1749	chr1	28821258	28821567	CD4_unstim_ND517	10	6.30078	2.79303	CD4_unstim
OCR_1750	chr1	28831964	28833217	CD4_unstim_ND517	102	15.8876	4.00391	CD4_unstim
OCR_1751	chr1	28836383	28836716	CD4_unstim_ND517	7	4.09362	2.22602	CD4_unstim
OCR_1752	chr1	28836873	28838300	CD4_unstim_ND517	11	1.5046	0.71491	CD4_unstim
OCR_1753	chr1	28844237	28845629	CD4_unstim_ND517	90	12.6197	3.67354	CD4_unstim
OCR_1754	chr1	28878842	28880451	CD4_unstim_ND517	146	17.7126	4.15655	CD4_unstim
OCR_1755	chr1	28907522	28908968	CD4_unstim_ND517	144	19.4379	4.29079	CD4_unstim
OCR_1756	chr1	28909175	28909631	CD4_unstim_ND517	7	2.99184	1.77368	CD4_unstim
OCR_1757	chr1	28918425	28919589	CD4_unstim_ND517	26	4.35917	2.1785	CD4_unstim
OCR_1758	chr1	28968910	28970606	CD4_unstim_ND517	144	16.5744	4.06087	CD4_unstim
OCR_1759	chr1	28974249	28974425	CD4_unstim_ND517	13	14.3459	3.94948	CD4_unstim
OCR_1760	chr1	28974477	28974960	CD4_unstim_ND517	122	49.2346	5.63338	CD4_unstim
OCR_1761	chr1	28975029	28975866	CD4_unstim_ND517	126	29.3686	4.88761	CD4_unstim
OCR_1762	chr1	28994889	28996670	CD4_unstim_ND517	142	15.5646	3.97032	CD4_unstim
OCR_1763	chr1	29062842	29064398	CD4_unstim_ND517	158	19.821	4.31806	CD4_unstim
OCR_1764	chr1	29083446	29083634	CD4_unstim_ND517	0	0	0.0474851	CD4_unstim
OCR_1765	chr1	29101525	29102279	CD4_unstim_ND517	54	13.9702	3.83075	CD4_unstim
OCR_1766	chr1	29111655	29112457	CD4_unstim_ND517	30	7.2973	2.91467	CD4_unstim
OCR_1767	chr1	29203619	29204147	CD4_unstim_ND517	10	3.69233	2.02204	CD4_unstim
OCR_1768	chr1	29211336	29211925	CD4_unstim_ND517	86	28.471	4.8481	CD4_unstim
OCR_1769	chr1	29213232	29213795	CD4_unstim_ND517	73	25.2813	4.67963	CD4_unstim
OCR_1770	chr1	29214000	29214436	CD4_unstim_ND517	22	9.83326	3.3618	CD4_unstim
OCR_1771	chr1	29240590	29242228	CD4_unstim_ND517	143	17.0417	4.10105	CD4_unstim
OCR_1772	chr1	29244315	29244507	CD4_unstim_ND517	1	1.01204	1.01727	CD4_unstim
OCR_1773	chr1	29247968	29248326	CD4_unstim_ND517	3	1.63224	1.12189	CD4_unstim
OCR_1774	chr1	29253305	29253748	CD4_unstim_ND517	37	16.277	4.06324	CD4_unstim
OCR_1775	chr1	29254412	29255106	CD4_unstim_ND517	13	3.65355	1.97621	CD4_unstim
OCR_1776	chr1	29255175	29255337	CD4_unstim_ND517	4	4.79323	2.58293	CD4_unstim
OCR_1777	chr1	29259742	29260426	CD4_unstim_ND517	5	1.42572	0.77473	CD4_unstim
OCR_1778	chr1	29276547	29276804	CD4_unstim_ND517	1	0.757071	0.5985	CD4_unstim
OCR_1779	chr1	29282451	29283061	CD4_unstim_ND517	1	0.31968	-0.645301	CD4_unstim
OCR_1780	chr1	29288914	29289357	CD4_unstim_ND517	1	0.43992	-0.184688	CD4_unstim
OCR_1781	chr1	29291333	29291547	CD4_unstim_ND517	2	1.81697	1.4465	CD4_unstim
OCR_1782	chr1	29291788	29292229	CD4_unstim_ND517	9	3.97719	2.14375	CD4_unstim
OCR_1783	chr1	29298462	29299428	CD4_unstim_ND517	5	1.00995	0.277318	CD4_unstim
OCR_1784	chr1	29310214	29310403	CD4_unstim_ND517	2	2.05605	1.62483	CD4_unstim
OCR_1785	chr1	29360426	29360608	CD4_unstim_ND517	1	1.06735	1.09403	CD4_unstim
OCR_1786	chr1	29368310	29369145	CD4_unstim_ND517	3	0.700924	-0.0976316	CD4_unstim
OCR_1787	chr1	29388480	29389478	CD4_unstim_ND517	2	0.39104	-0.769651	CD4_unstim
OCR_1788	chr1	29447724	29448412	CD4_unstim_ND517	29	8.2212	3.08826	CD4_unstim
OCR_1789	chr1	29449541	29450257	CD4_unstim_ND517	20	5.44838	2.51622	CD4_unstim
OCR_1790	chr1	29450361	29450686	CD4_unstim_ND517	13	7.78901	3.06835	CD4_unstim
OCR_1791	chr1	29450759	29451551	CD4_unstim_ND517	32	7.88194	3.02294	CD4_unstim
OCR_1792	chr1	29507510	29508911	CD4_unstim_ND517	192	26.7491	4.74891	CD4_unstim
OCR_1793	chr1	29523937	29524349	CD4_unstim_ND517	12	5.67528	2.62017	CD4_unstim
OCR_1794	chr1	29529223	29529858	CD4_unstim_ND517	8	2.45691	1.46677	CD4_unstim
OCR_1795	chr1	29556793	29557955	CD4_unstim_ND517	56	9.40512	3.25898	CD4_unstim
OCR_1796	chr1	29562581	29563488	CD4_unstim_ND517	39	8.38948	3.10511	CD4_unstim
OCR_1797	chr1	29563664	29564368	CD4_unstim_ND517	5	1.38528	0.733211	CD4_unstim
OCR_1798	chr1	29585738	29586880	CD4_unstim_ND517	16	2.7342	1.53858	CD4_unstim
OCR_1799	chr1	29609553	29610289	CD4_unstim_ND517	4	1.0601	0.406135	CD4_unstim
OCR_1800	chr1	30447101	30447521	CD4_unstim_ND517	4	1.85581	1.21398	CD4_unstim
OCR_1801	chr1	30558846	30559093	CD4_unstim_ND517	2	1.5752	1.24049	CD4_unstim
OCR_1802	chr1	30853021	30853712	CD4_unstim_ND517	11	3.10487	1.76006	CD4_unstim
OCR_1803	chr1	31091191	31091577	CD4_unstim_ND517	1	0.504714	0.0135378	CD4_unstim
OCR_1804	chr1	31158054	31159003	CD4_unstim_ND517	25	5.14011	2.41838	CD4_unstim
OCR_1805	chr1	31180998	31181242	CD4_unstim_ND517	5	3.98621	2.25805	CD4_unstim
OCR_1806	chr1	31190768	31192502	CD4_unstim_ND517	539	60.68	5.92582	CD4_unstim
OCR_1807	chr1	31204458	31205582	CD4_unstim_ND517	13	2.25708	1.28137	CD4_unstim
OCR_1808	chr1	31216373	31217529	CD4_unstim_ND517	160	27.0111	4.76447	CD4_unstim
OCR_1809	chr1	31221506	31222255	CD4_unstim_ND517	31	8.0734	3.05898	CD4_unstim
OCR_1810	chr1	31222553	31223028	CD4_unstim_ND517	68	27.9035	4.82343	CD4_unstim
OCR_1811	chr1	31226639	31226936	CD4_unstim_ND517	36	23.5962	4.60001	CD4_unstim
OCR_1812	chr1	31227542	31227744	CD4_unstim_ND517	9	8.6597	3.26632	CD4_unstim
OCR_1813	chr1	31229169	31229361	CD4_unstim_ND517	34	34.4095	5.14655	CD4_unstim
OCR_1814	chr1	31229408	31230043	CD4_unstim_ND517	67	20.5766	4.38431	CD4_unstim
OCR_1815	chr1	31230148	31230853	CD4_unstim_ND517	51	14.1098	3.84664	CD4_unstim
OCR_1816	chr1	31232634	31233045	CD4_unstim_ND517	27	12.8004	3.73058	CD4_unstim
OCR_1817	chr1	31235592	31235886	CD4_unstim_ND517	4	2.64846	1.72708	CD4_unstim
OCR_1818	chr1	31238438	31239197	CD4_unstim_ND517	12	3.08407	1.74031	CD4_unstim
OCR_1819	chr1	31241016	31241216	CD4_unstim_ND517	1	0.971763	0.958676	CD4_unstim
OCR_1820	chr1	31251275	31251538	CD4_unstim_ND517	0	0	-0.434667	CD4_unstim
OCR_1821	chr1	31252330	31252970	CD4_unstim_ND517	22	6.7038	2.80911	CD4_unstim
OCR_1822	chr1	31255211	31255487	CD4_unstim_ND517	18	12.6926	3.74391	CD4_unstim
OCR_1823	chr1	31255774	31256179	CD4_unstim_ND517	10	4.81094	2.40382	CD4_unstim
OCR_1824	chr1	31263798	31264041	CD4_unstim_ND517	9	7.20458	3.00092	CD4_unstim
OCR_1825	chr1	31274447	31275053	CD4_unstim_ND517	11	3.53965	1.94914	CD4_unstim
OCR_1826	chr1	31296774	31297581	CD4_unstim_ND517	9	2.17564	1.27344	CD4_unstim
OCR_1827	chr1	31327003	31327253	CD4_unstim_ND517	6	4.66911	2.44554	CD4_unstim
OCR_1828	chr1	31381053	31382607	CD4_unstim_ND517	32	4.01954	2.05142	CD4_unstim
OCR_1829	chr1	31384299	31384458	CD4_unstim_ND517	0	0	0.287799	CD4_unstim
OCR_1830	chr1	31401980	31402991	CD4_unstim_ND517	21	4.05317	2.08617	CD4_unstim
OCR_1831	chr1	31424988	31425377	CD4_unstim_ND517	2	1.00166	0.58736	CD4_unstim
OCR_1832	chr1	31449911	31450354	CD4_unstim_ND517	2	0.879839	0.400274	CD4_unstim
OCR_1833	chr1	31482745	31483432	CD4_unstim_ND517	14	3.97462	2.09035	CD4_unstim
OCR_1834	chr1	31483580	31483991	CD4_unstim_ND517	1	0.474088	-0.076773	CD4_unstim
OCR_1835	chr1	31492238	31492684	CD4_unstim_ND517	4	1.74787	1.12752	CD4_unstim
OCR_1836	chr1	31498020	31498503	CD4_unstim_ND517	4	1.61425	1.01279	CD4_unstim
OCR_1837	chr1	31501983	31502176	CD4_unstim_ND517	2	2.01365	1.59478	CD4_unstim
OCR_1838	chr1	31509455	31509965	CD4_unstim_ND517	2	0.764479	0.197511	CD4_unstim
OCR_1839	chr1	31527047	31527584	CD4_unstim_ND517	2	0.726113	0.123228	CD4_unstim
OCR_1840	chr1	31527638	31528214	CD4_unstim_ND517	1	0.338517	-0.5627	CD4_unstim
OCR_1841	chr1	31530903	31531618	CD4_unstim_ND517	10	2.72799	1.58534	CD4_unstim
OCR_1842	chr1	31537730	31539072	CD4_unstim_ND517	154	22.3976	4.49461	CD4_unstim
OCR_1843	chr1	31627420	31628678	CD4_unstim_ND517	47	7.29169	2.89663	CD4_unstim
OCR_1844	chr1	31635584	31635848	CD4_unstim_ND517	3	2.21122	1.55988	CD4_unstim
OCR_1845	chr1	31643657	31644043	CD4_unstim_ND517	4	2.01886	1.33547	CD4_unstim
OCR_1846	chr1	31654356	31654832	CD4_unstim_ND517	4	1.63794	1.03381	CD4_unstim
OCR_1847	chr1	31655050	31655606	CD4_unstim_ND517	8	2.80538	1.65812	CD4_unstim
OCR_1848	chr1	31769163	31770522	CD4_unstim_ND517	284	40.7883	5.35515	CD4_unstim
OCR_1849	chr1	31845609	31847005	CD4_unstim_ND517	22	3.07597	1.68517	CD4_unstim
OCR_1850	chr1	31867176	31868183	CD4_unstim_ND517	35	6.78209	2.80237	CD4_unstim
OCR_1851	chr1	31885687	31887019	CD4_unstim_ND517	41	6.00772	2.62158	CD4_unstim
OCR_1852	chr1	31895466	31895885	CD4_unstim_ND517	8	3.72046	2.06541	CD4_unstim
OCR_1853	chr1	31960062	31960366	CD4_unstim_ND517	0	0	-0.642938	CD4_unstim
OCR_1854	chr1	31971535	31971943	CD4_unstim_ND517	7	3.34296	1.93377	CD4_unstim
OCR_1855	chr1	32001591	32001940	CD4_unstim_ND517	7	3.90649	2.15852	CD4_unstim
OCR_1856	chr1	32014130	32015377	CD4_unstim_ND517	30	4.6953	2.27852	CD4_unstim
OCR_1857	chr1	32015446	32015699	CD4_unstim_ND517	1	0.768993	0.621043	CD4_unstim
OCR_1858	chr1	32029731	32029961	CD4_unstim_ND517	6	5.07336	2.56533	CD4_unstim
OCR_1859	chr1	32053444	32053667	CD4_unstim_ND517	3	2.61595	1.80237	CD4_unstim
OCR_1860	chr1	32059488	32059897	CD4_unstim_ND517	11	5.24041	2.51521	CD4_unstim
OCR_1861	chr1	32071465	32071795	CD4_unstim_ND517	1	0.590104	0.23904	CD4_unstim
OCR_1862	chr1	32082986	32084161	CD4_unstim_ND517	27	4.48449	2.21741	CD4_unstim
OCR_1863	chr1	32109806	32111084	CD4_unstim_ND517	216	32.9867	5.05048	CD4_unstim
OCR_1864	chr1	32129488	32129727	CD4_unstim_ND517	6	4.88311	2.51019	CD4_unstim
OCR_1865	chr1	32135588	32136363	CD4_unstim_ND517	13	3.27219	1.81717	CD4_unstim
OCR_1866	chr1	32169665	32169904	CD4_unstim_ND517	8	6.51081	2.87276	CD4_unstim
OCR_1867	chr1	32170306	32170618	CD4_unstim_ND517	3	1.87212	1.31971	CD4_unstim
OCR_1868	chr1	32170774	32171174	CD4_unstim_ND517	10	4.87093	2.4217	CD4_unstim
OCR_1869	chr1	32179995	32181599	CD4_unstim_ND517	13	1.58207	0.768725	CD4_unstim
OCR_1870	chr1	32202146	32202859	CD4_unstim_ND517	9	2.46207	1.45188	CD4_unstim
OCR_1871	chr1	32204872	32205282	CD4_unstim_ND517	26	12.3563	3.68162	CD4_unstim
OCR_1872	chr1	32211283	32211536	CD4_unstim_ND517	6	4.61396	2.4284	CD4_unstim
OCR_1873	chr1	32226024	32226839	CD4_unstim_ND517	47	11.2503	3.52226	CD4_unstim
OCR_1874	chr1	32228289	32228707	CD4_unstim_ND517	15	6.99252	2.89892	CD4_unstim
OCR_1875	chr1	32229331	32230448	CD4_unstim_ND517	41	7.16306	2.87534	CD4_unstim
OCR_1876	chr1	32237021	32237255	CD4_unstim_ND517	13	10.8052	3.54057	CD4_unstim
OCR_1877	chr1	32237399	32238516	CD4_unstim_ND517	50	8.73543	3.15545	CD4_unstim
OCR_1878	chr1	32253723	32255289	CD4_unstim_ND517	72	8.9747	3.18576	CD4_unstim
OCR_1879	chr1	32277562	32277971	CD4_unstim_ND517	3	1.4292	0.930247	CD4_unstim
OCR_1880	chr1	32281354	32281850	CD4_unstim_ND517	14	5.50209	2.55952	CD4_unstim
OCR_1881	chr1	32291792	32292050	CD4_unstim_ND517	0	0	-0.407081	CD4_unstim
OCR_1882	chr1	32292448	32293340	CD4_unstim_ND517	80	17.4983	4.14706	CD4_unstim
OCR_1883	chr1	32311076	32311286	CD4_unstim_ND517	6	5.55425	2.69598	CD4_unstim
OCR_1884	chr1	32313699	32314929	CD4_unstim_ND517	43	6.82286	2.80354	CD4_unstim
OCR_1885	chr1	32321027	32321467	CD4_unstim_ND517	0	0	-1.17491	CD4_unstim
OCR_1886	chr1	32354559	32355518	CD4_unstim_ND517	102	20.7532	4.38934	CD4_unstim
OCR_1887	chr1	32370036	32370788	CD4_unstim_ND517	7	1.81576	1.05322	CD4_unstim
OCR_1888	chr1	32376580	32376925	CD4_unstim_ND517	0	0	-0.824901	CD4_unstim
OCR_1889	chr1	32378536	32378815	CD4_unstim_ND517	2	1.39517	1.06541	CD4_unstim
OCR_1890	chr1	32388194	32388444	CD4_unstim_ND517	8	6.22548	2.80811	CD4_unstim
OCR_1891	chr1	32389560	32389775	CD4_unstim_ND517	3	2.71284	1.85484	CD4_unstim
OCR_1892	chr1	32391979	32392146	CD4_unstim_ND517	5	5.81322	2.80237	CD4_unstim
OCR_1893	chr1	32394185	32394341	CD4_unstim_ND517	5	6.22052	2.90007	CD4_unstim
OCR_1894	chr1	32394404	32394700	CD4_unstim_ND517	2	1.31532	0.980371	CD4_unstim
OCR_1895	chr1	32397277	32397535	CD4_unstim_ND517	1	0.754148	0.592919	CD4_unstim
OCR_1896	chr1	32398225	32398435	CD4_unstim_ND517	7	6.47995	2.88863	CD4_unstim
OCR_1897	chr1	32400317	32400618	CD4_unstim_ND517	5	3.23385	1.95629	CD4_unstim
OCR_1898	chr1	32402329	32402522	CD4_unstim_ND517	6	6.04096	2.81717	CD4_unstim
OCR_1899	chr1	32403014	32404510	CD4_unstim_ND517	157	20.4849	4.36565	CD4_unstim
OCR_1900	chr1	32405478	32405961	CD4_unstim_ND517	43	17.3532	4.1503	CD4_unstim
OCR_1901	chr1	32409240	32409470	CD4_unstim_ND517	7	5.91892	2.75798	CD4_unstim
OCR_1902	chr1	32409515	32409766	CD4_unstim_ND517	35	27.1284	4.80237	CD4_unstim
OCR_1903	chr1	32409909	32410690	CD4_unstim_ND517	75	18.7331	4.24663	CD4_unstim
OCR_1904	chr1	32421617	32421983	CD4_unstim_ND517	9	4.78997	2.41202	CD4_unstim
OCR_1905	chr1	32423150	32423816	CD4_unstim_ND517	6	1.75704	1.03554	CD4_unstim
OCR_1906	chr1	32429739	32430163	CD4_unstim_ND517	9	4.13628	2.20034	CD4_unstim
OCR_1907	chr1	32447079	32447316	CD4_unstim_ND517	7	5.74483	2.71491	CD4_unstim
OCR_1908	chr1	32447530	32448085	CD4_unstim_ND517	37	12.9982	3.73871	CD4_unstim
OCR_1909	chr1	32450323	32450630	CD4_unstim_ND517	10	6.3417	2.80237	CD4_unstim
OCR_1910	chr1	32450908	32451407	CD4_unstim_ND517	6	2.34389	1.4513	CD4_unstim
OCR_1911	chr1	32455325	32455516	CD4_unstim_ND517	6	6.10388	2.83212	CD4_unstim
OCR_1912	chr1	32457734	32457886	CD4_unstim_ND517	0	0	0.35234	CD4_unstim
OCR_1913	chr1	32469114	32469483	CD4_unstim_ND517	12	6.33484	2.77879	CD4_unstim
OCR_1914	chr1	32478872	32480467	CD4_unstim_ND517	209	25.5782	4.68373	CD4_unstim
OCR_1915	chr1	32529066	32529305	CD4_unstim_ND517	4	3.2554	2.02477	CD4_unstim
OCR_1916	chr1	32531899	32532415	CD4_unstim_ND517	8	3.02243	1.76563	CD4_unstim
OCR_1917	chr1	32537965	32539296	CD4_unstim_ND517	287	42.0856	5.40027	CD4_unstim
OCR_1918	chr1	32573419	32574534	CD4_unstim_ND517	94	16.452	4.05546	CD4_unstim
OCR_1919	chr1	32578440	32578814	CD4_unstim_ND517	10	5.20865	2.51841	CD4_unstim
OCR_1920	chr1	32587774	32588099	CD4_unstim_ND517	9	5.39239	2.58293	CD4_unstim
OCR_1921	chr1	32610775	32611035	CD4_unstim_ND517	1	0.748369	0.581822	CD4_unstim
OCR_1922	chr1	32644940	32645919	CD4_unstim_ND517	78	15.5462	3.97687	CD4_unstim
OCR_1923	chr1	32645964	32646378	CD4_unstim_ND517	13	6.11859	2.72011	CD4_unstim
OCR_1924	chr1	32665814	32667431	CD4_unstim_ND517	116	14.0035	3.8201	CD4_unstim
OCR_1925	chr1	32671076	32671557	CD4_unstim_ND517	47	19.0461	4.2818	CD4_unstim
OCR_1926	chr1	32681254	32681691	CD4_unstim_ND517	9	4.01351	2.15687	CD4_unstim
OCR_1927	chr1	32681839	32682110	CD4_unstim_ND517	8	5.74483	2.69219	CD4_unstim
OCR_1928	chr1	32687426	32688652	CD4_unstim_ND517	63	10.0289	3.34881	CD4_unstim
OCR_1929	chr1	32705858	32707310	CD4_unstim_ND517	57	7.66241	2.96289	CD4_unstim
OCR_1930	chr1	32713857	32714067	CD4_unstim_ND517	11	10.1828	3.47359	CD4_unstim
OCR_1931	chr1	32715358	32716289	CD4_unstim_ND517	115	24.1012	4.60352	CD4_unstim
OCR_1932	chr1	32716507	32717162	CD4_unstim_ND517	40	11.91	3.60973	CD4_unstim
OCR_1933	chr1	32719496	32719647	CD4_unstim_ND517	9	11.5653	3.68373	CD4_unstim
OCR_1934	chr1	32729325	32729781	CD4_unstim_ND517	47	20.0881	4.35864	CD4_unstim
OCR_1935	chr1	32732493	32732843	CD4_unstim_ND517	15	8.34719	3.1544	CD4_unstim
OCR_1936	chr1	32732922	32733170	CD4_unstim_ND517	12	9.41322	3.35017	CD4_unstim
OCR_1937	chr1	32738212	32739936	CD4_unstim_ND517	128	14.4936	3.86857	CD4_unstim
OCR_1938	chr1	32757107	32758472	CD4_unstim_ND517	188	26.8821	4.75623	CD4_unstim
OCR_1939	chr1	32772995	32773256	CD4_unstim_ND517	1	0.745513	0.576305	CD4_unstim
OCR_1940	chr1	32774265	32774605	CD4_unstim_ND517	5	2.86399	1.78106	CD4_unstim
OCR_1941	chr1	32785639	32785952	CD4_unstim_ND517	9	5.59847	2.63703	CD4_unstim
OCR_1942	chr1	32787016	32787266	CD4_unstim_ND517	3	2.33455	1.63818	CD4_unstim
OCR_1943	chr1	32787465	32788014	CD4_unstim_ND517	47	16.6913	4.0914	CD4_unstim
OCR_1944	chr1	32788142	32788447	CD4_unstim_ND517	12	7.65978	3.05278	CD4_unstim
OCR_1945	chr1	32800592	32802201	CD4_unstim_ND517	91	11.0401	3.48044	CD4_unstim
OCR_1946	chr1	32803019	32803276	CD4_unstim_ND517	17	12.8702	3.76843	CD4_unstim
OCR_1947	chr1	32805198	32805466	CD4_unstim_ND517	2	1.45223	1.12323	CD4_unstim
OCR_1948	chr1	32811121	32811333	CD4_unstim_ND517	7	6.41911	2.87502	CD4_unstim
OCR_1949	chr1	32816588	32817729	CD4_unstim_ND517	107	18.301	4.20727	CD4_unstim
OCR_1950	chr1	32825576	32825833	CD4_unstim_ND517	19	14.3843	3.92043	CD4_unstim
OCR_1951	chr1	32827115	32828306	CD4_unstim_ND517	24	3.9327	2.03442	CD4_unstim
OCR_1952	chr1	32837573	32838294	CD4_unstim_ND517	46	12.4445	3.66846	CD4_unstim
OCR_1953	chr1	32852472	32853060	CD4_unstim_ND517	11	3.64782	1.99257	CD4_unstim
OCR_1954	chr1	32859541	32860742	CD4_unstim_ND517	238	38.6749	5.27937	CD4_unstim
OCR_1955	chr1	32866334	32866899	CD4_unstim_ND517	9	3.10586	1.787	CD4_unstim
OCR_1956	chr1	32879597	32879858	CD4_unstim_ND517	10	7.45513	3.03574	CD4_unstim
OCR_1957	chr1	32914001	32914204	CD4_unstim_ND517	3	2.87242	1.9373	CD4_unstim
OCR_1958	chr1	32929919	32930116	CD4_unstim_ND517	4	3.94595	2.3023	CD4_unstim
OCR_1959	chr1	32930329	32930767	CD4_unstim_ND517	7	3.11451	1.83165	CD4_unstim
OCR_1960	chr1	32965782	32966752	CD4_unstim_ND517	12	2.41389	1.38684	CD4_unstim
OCR_1961	chr1	32986072	32987037	CD4_unstim_ND517	30	6.06597	2.64804	CD4_unstim
OCR_1962	chr1	33004841	33005931	CD4_unstim_ND517	11	1.96936	1.10325	CD4_unstim
OCR_1963	chr1	33077565	33078356	CD4_unstim_ND517	17	4.19257	2.1503	CD4_unstim
OCR_1964	chr1	33088674	33089935	CD4_unstim_ND517	6	0.928642	0.115586	CD4_unstim
OCR_1965	chr1	33093185	33093391	CD4_unstim_ND517	1	0.943596	0.916241	CD4_unstim
OCR_1966	chr1	33115847	33116349	CD4_unstim_ND517	163	63.2959	5.99286	CD4_unstim
OCR_1967	chr1	33116437	33117508	CD4_unstim_ND517	284	51.7464	5.69846	CD4_unstim
OCR_1968	chr1	33168131	33168455	CD4_unstim_ND517	4	2.40399	1.58736	CD4_unstim
OCR_1969	chr1	33168660	33168961	CD4_unstim_ND517	6	3.88061	2.17868	CD4_unstim
OCR_1970	chr1	33177778	33178309	CD4_unstim_ND517	16	5.87441	2.64191	CD4_unstim
OCR_1971	chr1	33182294	33182616	CD4_unstim_ND517	7	4.23303	2.27434	CD4_unstim
OCR_1972	chr1	33190751	33191104	CD4_unstim_ND517	3	1.65529	1.14212	CD4_unstim
OCR_1973	chr1	33207062	33207678	CD4_unstim_ND517	8	2.53257	1.51053	CD4_unstim
OCR_1974	chr1	33219177	33220497	CD4_unstim_ND517	105	15.5254	3.97023	CD4_unstim
OCR_1975	chr1	33225323	33226181	CD4_unstim_ND517	14	3.1834	1.7701	CD4_unstim
OCR_1976	chr1	33226871	33227623	CD4_unstim_ND517	7	1.81576	1.05322	CD4_unstim
OCR_1977	chr1	33238510	33240119	CD4_unstim_ND517	23	2.79035	1.54185	CD4_unstim
OCR_1978	chr1	33264499	33265082	CD4_unstim_ND517	25	8.36148	3.12034	CD4_unstim
OCR_1979	chr1	33266730	33267335	CD4_unstim_ND517	22	7.09098	2.89012	CD4_unstim
OCR_1980	chr1	33282406	33284085	CD4_unstim_ND517	266	30.9263	4.95618	CD4_unstim
OCR_1981	chr1	33284514	33284822	CD4_unstim_ND517	3	1.89635	1.33826	CD4_unstim
OCR_1982	chr1	33336176	33336420	CD4_unstim_ND517	13	10.3641	3.48044	CD4_unstim
OCR_1983	chr1	33336694	33336927	CD4_unstim_ND517	8	6.67775	2.90929	CD4_unstim
OCR_1984	chr1	33337135	33337521	CD4_unstim_ND517	1	0.504714	0.0135378	CD4_unstim
OCR_1985	chr1	33338160	33338558	CD4_unstim_ND517	12	5.87441	2.66992	CD4_unstim
OCR_1986	chr1	33342019	33342573	CD4_unstim_ND517	11	3.87129	2.07835	CD4_unstim
OCR_1987	chr1	33352238	33352451	CD4_unstim_ND517	9	8.21457	3.19019	CD4_unstim
OCR_1988	chr1	33358359	33359605	CD4_unstim_ND517	21	3.28934	1.78491	CD4_unstim
OCR_1989	chr1	33366132	33367460	CD4_unstim_ND517	12	1.76365	0.934042	CD4_unstim
OCR_1990	chr1	33390468	33390875	CD4_unstim_ND517	11	5.2661	2.52226	CD4_unstim
OCR_1991	chr1	33391086	33391292	CD4_unstim_ND517	9	8.49236	3.23817	CD4_unstim
OCR_1992	chr1	33399097	33399354	CD4_unstim_ND517	5	3.78535	2.18346	CD4_unstim
OCR_1993	chr1	33408739	33409030	CD4_unstim_ND517	3	2.00676	1.4199	CD4_unstim
OCR_1994	chr1	33429377	33430744	CD4_unstim_ND517	157	22.4166	4.49566	CD4_unstim
OCR_1995	chr1	33438388	33438959	CD4_unstim_ND517	7	2.39033	1.44986	CD4_unstim
OCR_1996	chr1	33446200	33446401	CD4_unstim_ND517	1	0.966952	0.951516	CD4_unstim
OCR_1997	chr1	33446481	33447359	CD4_unstim_ND517	38	8.44405	3.11541	CD4_unstim
OCR_1998	chr1	33457970	33458557	CD4_unstim_ND517	7	2.32529	1.41006	CD4_unstim
OCR_1999	chr1	33470329	33470688	CD4_unstim_ND517	1	0.542567	0.117874	CD4_unstim
[truncated: 1,046,576+ more rows]
