# Supplementary material for: Dynamic chromatin architecture identifies new autoimmune-associated enhancers for IL2 and novel genes regulating CD4+ T cell activation
Source: eLife. 2024 Sep 20;13:RP96852. doi: 10.7554/eLife.96852 (PMC11418197; doi:10.7554/eLife.96852)
Supplement: Supplementary file 5. [file elife-96852-supp5.xlsx]

## Sheet: Table S5
id	chr	start	end	logFC	logCPM	F	PValue	FDR	comp	direction		Table S5: Differential accessible open chromatin regions
OCR_99812	chr21	26952164	26953463	7.37547	5.91366	531.796	1.45e-117	1.11e-112	CD4_8hr_vs_unstim	up
OCR_99810	chr21	26950127	26951348	6.01791	6.45028	506.187	5.29e-112	2.02e-107	CD4_8hr_vs_unstim	up
OCR_34283	chr12	14373801	14374846	5.64042	5.33247	329.786	1.17e-73	2.99e-69	CD4_8hr_vs_unstim	up
OCR_23434	chr10	101908214	101909075	6.55185	4.91791	323.402	2.87e-72	5.48e-68	CD4_8hr_vs_unstim	up
OCR_99794	chr21	26873809	26875417	4.8744	5.56189	319.623	1.9e-71	2.91e-67	CD4_8hr_vs_unstim	up
OCR_7431	chr1	104058587	104059897	5.49269	5.07124	287.164	2.21e-64	2.82e-60	CD4_8hr_vs_unstim	up
OCR_99771	chr21	26768294	26769101	5.71452	5.19687	283.779	1.2e-63	1.32e-59	CD4_8hr_vs_unstim	up
OCR_109642	chr3	105838362	105839162	5.68516	4.73864	282.09	2.81e-63	2.69e-59	CD4_8hr_vs_unstim	up
OCR_66461	chr17	45798225	45799000	4.48269	5.17872	268.745	2.26e-60	1.92e-56	CD4_8hr_vs_unstim	up
OCR_148988	chr6	138225565	138226743	4.49436	5.14224	260.039	1.78e-58	1.36e-54	CD4_8hr_vs_unstim	up
OCR_129443	chr5	32462492	32463343	6.43671	4.20294	258.638	3.59e-58	2.5e-54	CD4_8hr_vs_unstim	up
OCR_25762	chr11	9780930	9781669	3.82041	5.71763	257.863	5.3e-58	3.38e-54	CD4_8hr_vs_unstim	up
OCR_91056	chr2	191586789	191587558	4.21857	5.33938	252.437	8.05e-57	4.74e-53	CD4_8hr_vs_unstim	up
OCR_102252	chr22	39269879	39270589	5.16534	4.4846	250.357	2.29e-56	1.25e-52	CD4_8hr_vs_unstim	up
OCR_1341	chr1	24814430	24815158	5.58545	4.21603	247.186	1.12e-55	5.72e-52	CD4_8hr_vs_unstim	up
OCR_97702	chr20	50147625	50148338	4.67974	4.95107	244.191	5.04e-55	2.41e-51	CD4_8hr_vs_unstim	up
OCR_53016	chr14	50810792	50811386	5.31423	4.57322	241.509	1.93e-54	8.71e-51	CD4_8hr_vs_unstim	up
OCR_88113	chr2	162023074	162023967	4.28741	5.18991	240.132	3.86e-54	1.64e-50	CD4_8hr_vs_unstim	up
OCR_35917	chr12	28650570	28651545	4.72074	5.18447	238.969	6.94e-54	2.8e-50	CD4_8hr_vs_unstim	up
OCR_124687	chr4	146728947	146730076	5.28142	4.67164	237.976	1.14e-53	4.36e-50	CD4_8hr_vs_unstim	up
OCR_152729	chr7	16659316	16660232	4.41806	5.35017	235.274	4.42e-53	1.61e-49	CD4_8hr_vs_unstim	up
OCR_167516	chr8	95271289	95271765	5.74396	4.19908	233.504	1.07e-52	3.73e-49	CD4_8hr_vs_unstim	up
OCR_62541	chr16	69200047	69200821	4.21415	4.97158	230.332	5.27e-52	1.75e-48	CD4_8hr_vs_unstim	up
OCR_163876	chr8	29326593	29327484	5.61877	4.13349	230.072	6e-52	1.91e-48	CD4_8hr_vs_unstim	up
OCR_2216	chr1	38493543	38494275	4.87489	4.76253	229.646	7.44e-52	2.28e-48	CD4_8hr_vs_unstim	up
OCR_164941	chr8	59636632	59637560	5.09656	4.49906	228.893	1.09e-51	3.19e-48	CD4_8hr_vs_unstim	up
OCR_42466	chr12	92991623	92992127	5.72131	3.9029	228.744	1.17e-51	3.31e-48	CD4_8hr_vs_unstim	up
OCR_17261	chr10	7298944	7299728	4.50541	4.68527	225.895	4.88e-51	1.34e-47	CD4_8hr_vs_unstim	up
OCR_120433	chr4	83354922	83355275	5.88754	4.11028	225.723	5.32e-51	1.41e-47	CD4_8hr_vs_unstim	up
OCR_58575	chr15	72555907	72556791	6.19592	4.11654	225.532	5.86e-51	1.5e-47	CD4_8hr_vs_unstim	up
OCR_33275	chr12	903928	905010	4.43308	4.72211	223.01	2.08e-50	5.13e-47	CD4_8hr_vs_unstim	up
OCR_94572	chr2	228275617	228276569	4.16937	5.04588	222.37	2.87e-50	6.85e-47	CD4_8hr_vs_unstim	up
OCR_122935	chr4	120130254	120130633	4.67136	4.66754	221.498	4.44e-50	1.03e-46	CD4_8hr_vs_unstim	up
OCR_64573	chr17	15931350	15931980	4.24526	4.88035	220.497	7.33e-50	1.64e-46	CD4_8hr_vs_unstim	up
OCR_140008	chr6	30778367	30779163	4.74776	4.50822	220.456	7.49e-50	1.64e-46	CD4_8hr_vs_unstim	up
OCR_80077	chr2	39326842	39327995	4.86707	4.4716	220.007	9.38e-50	1.99e-46	CD4_8hr_vs_unstim	up
OCR_14805	chr1	218550313	218551224	4.22933	5.12688	219.451	1.24e-49	2.5e-46	CD4_8hr_vs_unstim	up
OCR_20882	chr10	63642151	63643315	4.52537	4.73653	219.499	1.21e-49	2.5e-46	CD4_8hr_vs_unstim	up
OCR_24111	chr10	112272106	112273304	4.97871	4.20499	218.732	1.78e-49	3.49e-46	CD4_8hr_vs_unstim	up
OCR_145228	chr6	97355219	97356021	4.84525	4.83561	218.3	2.21e-49	4.23e-46	CD4_8hr_vs_unstim	up
OCR_64238	chr17	9193127	9193834	4.1959	4.9446	218.083	2.46e-49	4.52e-46	CD4_8hr_vs_unstim	up
OCR_174816	chr9	102015466	102016743	4.32785	4.88744	218.071	2.48e-49	4.52e-46	CD4_8hr_vs_unstim	up
OCR_133055	chr5	95205717	95206483	3.75227	5.32514	217.878	2.73e-49	4.86e-46	CD4_8hr_vs_unstim	up
OCR_99796	chr21	26882140	26882884	5.68941	4.19872	216.619	5.14e-49	8.93e-46	CD4_8hr_vs_unstim	up
OCR_74519	chr19	6661566	6662241	4.71081	4.36335	216.103	6.65e-49	1.13e-45	CD4_8hr_vs_unstim	up
OCR_91966	chr2	197852387	197853269	4.47597	4.60211	214.496	1.49e-48	2.48e-45	CD4_8hr_vs_unstim	up
OCR_9294	chr1	154142866	154144002	5.95618	3.76195	214.086	1.83e-48	2.98e-45	CD4_8hr_vs_unstim	up
OCR_28312	chr11	57173581	57174482	4.92739	4.3567	213.113	2.99e-48	4.76e-45	CD4_8hr_vs_unstim	up
OCR_27885	chr11	43852299	43853019	5.20056	4.22866	212.217	4.68e-48	7.27e-45	CD4_8hr_vs_unstim	up
OCR_40198	chr12	75882985	75883792	4.21258	4.88738	212.187	4.75e-48	7.27e-45	CD4_8hr_vs_unstim	up
OCR_163897	chr8	29427097	29427896	5.52712	4.20404	211.664	6.18e-48	9.27e-45	CD4_8hr_vs_unstim	up
OCR_70973	chr18	32445800	32446723	4.38119	4.90425	211.388	7.09e-48	1.04e-44	CD4_8hr_vs_unstim	up
OCR_71397	chr18	39562582	39563754	4.57504	4.78741	211.007	8.59e-48	1.24e-44	CD4_8hr_vs_unstim	up
OCR_3635	chr1	66749282	66749787	5.24958	4.31488	210.669	1.02e-47	1.44e-44	CD4_8hr_vs_unstim	up
OCR_109561	chr3	105312860	105313717	5.94523	3.57619	210.668	1.03e-47	1.44e-44	CD4_8hr_vs_unstim	up
OCR_42003	chr12	89888142	89889304	4.16648	5.13097	210.565	1.07e-47	1.47e-44	CD4_8hr_vs_unstim	up
OCR_99803	chr21	26927669	26928210	6.17137	3.54827	209.82	1.56e-47	2.09e-44	CD4_8hr_vs_unstim	up
OCR_148092	chr6	128976811	128977711	4.99564	4.56952	209.75	1.62e-47	2.13e-44	CD4_8hr_vs_unstim	up
OCR_18331	chr10	22535107	22536354	3.7407	5.16739	209.032	2.32e-47	3e-44	CD4_8hr_vs_unstim	up
OCR_52674	chr14	45583337	45584002	4.7475	4.53487	208.796	2.61e-47	3.33e-44	CD4_8hr_vs_unstim	up
OCR_39097	chr12	65642534	65643920	4.57817	4.7392	208.236	3.45e-47	4.33e-44	CD4_8hr_vs_unstim	up
OCR_152224	chr7	12295703	12296214	4.4805	4.41278	207.905	4.08e-47	5.03e-44	CD4_8hr_vs_unstim	up
OCR_96686	chr20	30791614	30792435	4.92522	4.21671	207.012	6.39e-47	7.64e-44	CD4_8hr_vs_unstim	up
OCR_157205	chr7	92260620	92261300	4.01012	5.15597	207.013	6.38e-47	7.64e-44	CD4_8hr_vs_unstim	up
OCR_152802	chr7	17300716	17301591	4.52718	4.5378	206.752	7.27e-47	8.57e-44	CD4_8hr_vs_unstim	up
OCR_21102	chr10	65466887	65467542	5.21463	4.19307	205.754	1.2e-46	1.38e-43	CD4_8hr_vs_unstim	up
OCR_165489	chr8	68417823	68418906	4.24974	4.82035	205.735	1.21e-46	1.38e-43	CD4_8hr_vs_unstim	up
OCR_102641	chr22	43259190	43260066	5.54243	3.67031	205.509	1.36e-46	1.53e-43	CD4_8hr_vs_unstim	up
OCR_147148	chr6	119854695	119855405	4.54737	4.68662	204.826	1.91e-46	2.12e-43	CD4_8hr_vs_unstim	up
OCR_169749	chr8	129088802	129089708	4.39482	4.59945	204.668	2.07e-46	2.27e-43	CD4_8hr_vs_unstim	up
OCR_89581	chr2	179379216	179380009	5.21249	4.04227	204.067	2.8e-46	3.02e-43	CD4_8hr_vs_unstim	up
OCR_138130	chr6	2110742	2111962	5.4837	4.07719	203.294	4.13e-46	4.39e-43	CD4_8hr_vs_unstim	up
OCR_43789	chr12	111214247	111214914	5.2004	4.01594	203.065	4.63e-46	4.86e-43	CD4_8hr_vs_unstim	up
OCR_178121	chrX	45569222	45570157	4.91991	4.12446	202.813	5.26e-46	5.44e-43	CD4_8hr_vs_unstim	up
OCR_9142	chr1	151284005	151284843	4.43264	4.42631	202.49	6.25e-46	6.38e-43	CD4_8hr_vs_unstim	up
OCR_32357	chr11	118103300	118103910	5.59213	3.65231	201.679	9.29e-46	9.36e-43	CD4_8hr_vs_unstim	up
OCR_67525	chr17	57920166	57921568	4.38042	4.50549	201.053	1.29e-45	1.28e-42	CD4_8hr_vs_unstim	up
OCR_56150	chr15	22474453	22475447	3.5609	5.35981	200.252	1.9e-45	1.87e-42	CD4_8hr_vs_unstim	up
OCR_125800	chr4	166125287	166125933	3.83235	4.95863	200.176	1.98e-45	1.91e-42	CD4_8hr_vs_unstim	up
OCR_158608	chr7	110726581	110727083	4.71111	4.25467	199.726	2.48e-45	2.37e-42	CD4_8hr_vs_unstim	up
OCR_42444	chr12	92864114	92864887	4.33769	4.62049	199.519	2.75e-45	2.6e-42	CD4_8hr_vs_unstim	up
OCR_42790	chr12	96570481	96571309	3.88238	5.00862	199.438	2.86e-45	2.67e-42	CD4_8hr_vs_unstim	up
OCR_71773	chr18	48426700	48427632	5.44426	4.09646	198.887	3.77e-45	3.48e-42	CD4_8hr_vs_unstim	up
OCR_20790	chr10	62370875	62371723	4.91414	4.25867	198.33	4.99e-45	4.55e-42	CD4_8hr_vs_unstim	up
OCR_140855	chr6	41925760	41926783	5.4258	3.79898	197.787	6.56e-45	5.9e-42	CD4_8hr_vs_unstim	up
OCR_10418	chr1	169563405	169564326	5.70976	3.8255	196.978	9.84e-45	8.76e-42	CD4_8hr_vs_unstim	up
OCR_71510	chr18	42466901	42467744	4.83859	4.95347	196.752	1.1e-44	9.7e-42	CD4_8hr_vs_unstim	up
OCR_68054	chr17	64651712	64652521	5.33924	3.56252	196.426	1.3e-44	1.13e-41	CD4_8hr_vs_unstim	up
OCR_60682	chr16	15666164	15666926	6.01582	3.49264	195.563	2e-44	1.72e-41	CD4_8hr_vs_unstim	up
OCR_171009	chr9	7755808	7756789	4.17307	4.72714	195.214	2.39e-44	2.03e-41	CD4_8hr_vs_unstim	up
OCR_35575	chr12	24992151	24992773	3.89809	5.25835	195.158	2.46e-44	2.05e-41	CD4_8hr_vs_unstim	up
OCR_80425	chr2	44843569	44844409	3.74992	5.08322	195.148	2.47e-44	2.05e-41	CD4_8hr_vs_unstim	up
OCR_64572	chr17	15930822	15931292	4.78839	4.12009	194.998	2.66e-44	2.19e-41	CD4_8hr_vs_unstim	up
OCR_7091	chr1	101619182	101619846	5.47302	3.8325	194.761	3e-44	2.42e-41	CD4_8hr_vs_unstim	up
OCR_111528	chr3	133958047	133958924	4.75623	4.41336	194.767	2.99e-44	2.42e-41	CD4_8hr_vs_unstim	up
OCR_101962	chr22	36075368	36076078	5.47053	3.53022	194.191	3.99e-44	3.18e-41	CD4_8hr_vs_unstim	up
OCR_95004	chr2	234156092	234156809	3.79216	4.90871	194.17	4.03e-44	3.18e-41	CD4_8hr_vs_unstim	up
OCR_31344	chr11	102470004	102470901	4.67277	4.47834	194.15	4.11e-44	3.21e-41	CD4_8hr_vs_unstim	up
OCR_42659	chr12	94563213	94563822	4.70874	3.81562	193.17	6.67e-44	5.15e-41	CD4_8hr_vs_unstim	up
OCR_35905	chr12	28405878	28406993	3.15622	5.80906	192.775	8.13e-44	6.22e-41	CD4_8hr_vs_unstim	up
OCR_51995	chr14	36784391	36784983	4.99513	4.22571	192.499	9.33e-44	7.07e-41	CD4_8hr_vs_unstim	up
OCR_57866	chr15	60211257	60212329	4.01185	4.70152	192.414	9.74e-44	7.31e-41	CD4_8hr_vs_unstim	up
OCR_8617	chr1	117619739	117620504	4.63828	4.24521	192.351	1.01e-43	7.47e-41	CD4_8hr_vs_unstim	up
OCR_49987	chr13	95071423	95072224	3.05874	5.92983	192.278	1.04e-43	7.68e-41	CD4_8hr_vs_unstim	up
OCR_114301	chr3	172268229	172269117	4.10981	4.55433	192.075	1.16e-43	8.42e-41	CD4_8hr_vs_unstim	up
OCR_118504	chr4	48911603	48912136	4.8963	4.36859	192	1.2e-43	8.66e-41	CD4_8hr_vs_unstim	up
OCR_110240	chr3	111721017	111722048	3.08333	5.76903	191.808	1.32e-43	9.45e-41	CD4_8hr_vs_unstim	up
OCR_71870	chr18	51675048	51676013	4.37496	4.60944	191.756	1.36e-43	9.61e-41	CD4_8hr_vs_unstim	up
OCR_163884	chr8	29381488	29382186	4.96003	3.94267	191.412	1.61e-43	1.13e-40	CD4_8hr_vs_unstim	up
OCR_171865	chr9	21684577	21685663	4.2948	4.48948	191.349	1.66e-43	1.16e-40	CD4_8hr_vs_unstim	up
OCR_140861	chr6	41944496	41945242	4.96691	3.8986	191.326	1.68e-43	1.16e-40	CD4_8hr_vs_unstim	up
OCR_76547	chr19	41120800	41121423	3.56888	5.02916	191.303	1.7e-43	1.16e-40	CD4_8hr_vs_unstim	up
OCR_100151	chr21	32666224	32666808	5.02424	3.86843	190.759	2.24e-43	1.52e-40	CD4_8hr_vs_unstim	up
OCR_153161	chr7	21978657	21979803	3.84324	5.13844	190.399	2.68e-43	1.8e-40	CD4_8hr_vs_unstim	up
OCR_120626	chr4	87979192	87980109	4.03276	4.4863	190.33	2.78e-43	1.85e-40	CD4_8hr_vs_unstim	up
OCR_81614	chr2	62532703	62533453	3.74501	4.97405	189.751	3.71e-43	2.45e-40	CD4_8hr_vs_unstim	up
OCR_170803	chr9	4970716	4971804	3.51635	5.17948	189.135	5.06e-43	3.31e-40	CD4_8hr_vs_unstim	up
OCR_19158	chr10	33422847	33423597	3.57937	5.12909	188.394	7.34e-43	4.76e-40	CD4_8hr_vs_unstim	up
OCR_63352	chr16	87908267	87909265	4.70656	3.96869	187.971	9.08e-43	5.84e-40	CD4_8hr_vs_unstim	up
OCR_109897	chr3	107849528	107850378	4.60993	3.97386	187.618	1.08e-42	6.91e-40	CD4_8hr_vs_unstim	up
OCR_55452	chr14	97846751	97847413	5.24782	3.54621	187.316	1.26e-42	7.98e-40	CD4_8hr_vs_unstim	up
OCR_35586	chr12	25072326	25072979	4.82691	4.29394	186.823	1.62e-42	1.01e-39	CD4_8hr_vs_unstim	up
OCR_100293	chr21	34806818	34807737	4.85382	4.07453	186.621	1.81e-42	1.12e-39	CD4_8hr_vs_unstim	up
OCR_52671	chr14	45559075	45559797	4.28714	4.45177	186.306	2.09e-42	1.29e-39	CD4_8hr_vs_unstim	up
OCR_18982	chr10	31389854	31390677	4.0581	4.56358	185.944	2.51e-42	1.54e-39	CD4_8hr_vs_unstim	up
OCR_65686	chr17	36857068	36857465	4.21676	4.31537	185.815	2.71e-42	1.65e-39	CD4_8hr_vs_unstim	up
OCR_24092	chr10	112124244	112124835	5.39139	3.30418	185.613	2.97e-42	1.79e-39	CD4_8hr_vs_unstim	up
OCR_38873	chr12	63034289	63035318	3.73099	4.96864	185.103	3.83e-42	2.29e-39	CD4_8hr_vs_unstim	up
OCR_48332	chr13	75882119	75882732	5.26714	3.83088	185.012	4.01e-42	2.38e-39	CD4_8hr_vs_unstim	up
OCR_122415	chr4	114305304	114306384	4.82555	4.20773	184.638	4.84e-42	2.85e-39	CD4_8hr_vs_unstim	up
OCR_139960	chr6	30495374	30496311	4.75815	3.89605	184.549	5.06e-42	2.96e-39	CD4_8hr_vs_unstim	up
OCR_2749	chr1	46650360	46651354	4.15941	4.2732	184.401	5.45e-42	3.16e-39	CD4_8hr_vs_unstim	up
OCR_2124	chr1	36765456	36766046	4.58012	3.93765	184.022	6.6e-42	3.8e-39	CD4_8hr_vs_unstim	up
OCR_6096	chr1	90190195	90191011	4.02976	4.61866	183.963	6.8e-42	3.87e-39	CD4_8hr_vs_unstim	up
OCR_121399	chr4	99403995	99404834	4.29545	4.37245	183.954	6.83e-42	3.87e-39	CD4_8hr_vs_unstim	up
OCR_115508	chr3	190037221	190038030	4.21238	4.35905	183.441	8.83e-42	4.97e-39	CD4_8hr_vs_unstim	up
OCR_3781	chr1	68149546	68150218	3.57325	4.97598	183.047	1.08e-41	6.02e-39	CD4_8hr_vs_unstim	up
OCR_6026	chr1	89916203	89917209	4.83863	4.03605	182.978	1.11e-41	6.18e-39	CD4_8hr_vs_unstim	up
OCR_4517	chr1	75229284	75230065	4.67315	4.41263	182.818	1.21e-41	6.65e-39	CD4_8hr_vs_unstim	up
OCR_64039	chr17	6963421	6964373	4.92984	3.70609	182.389	1.52e-41	8.29e-39	CD4_8hr_vs_unstim	up
OCR_97647	chr20	49341019	49341938	5.45556	3.64284	182.328	1.55e-41	8.38e-39	CD4_8hr_vs_unstim	up
OCR_169030	chr8	116635184	116635815	5.45612	3.69733	182.317	1.55e-41	8.38e-39	CD4_8hr_vs_unstim	up
OCR_71214	chr18	36520115	36521833	2.89136	6.04869	182.165	1.68e-41	8.98e-39	CD4_8hr_vs_unstim	up
OCR_67864	chr17	62925872	62926274	5.90185	3.10941	181.727	2.1e-41	1.12e-38	CD4_8hr_vs_unstim	up
OCR_37646	chr12	51378523	51379650	5.10187	3.55964	181.627	2.2e-41	1.16e-38	CD4_8hr_vs_unstim	up
OCR_50483	chr13	103045153	103045611	4.79953	3.96678	181.549	2.29e-41	1.2e-38	CD4_8hr_vs_unstim	up
OCR_10375	chr1	169107842	169108757	4.99272	3.85187	181.201	2.72e-41	1.42e-38	CD4_8hr_vs_unstim	up
OCR_154282	chr7	42908452	42909634	5.27892	4.09123	180.575	3.73e-41	1.93e-38	CD4_8hr_vs_unstim	up
OCR_53022	chr14	50987968	50989172	3.90128	4.72833	180.381	4.11e-41	2.11e-38	CD4_8hr_vs_unstim	up
OCR_34008	chr12	10853474	10854394	3.87527	4.6847	180.244	4.4e-41	2.25e-38	CD4_8hr_vs_unstim	up
OCR_95494	chr20	413791	414788	4.06363	4.28195	179.916	5.19e-41	2.63e-38	CD4_8hr_vs_unstim	up
OCR_155508	chr7	77022280	77023103	5.32938	3.72096	179.681	5.84e-41	2.94e-38	CD4_8hr_vs_unstim	up
OCR_66602	chr17	46992877	46993822	4.82898	3.76409	179.498	6.41e-41	3.2e-38	CD4_8hr_vs_unstim	up
OCR_35741	chr12	26901437	26902500	4.31536	4.53805	179.267	7.2e-41	3.55e-38	CD4_8hr_vs_unstim	up
OCR_45188	chr13	27705095	27706002	3.84153	4.73807	179.273	7.17e-41	3.55e-38	CD4_8hr_vs_unstim	up
OCR_137749	chr5	176080166	176080868	4.59661	3.7851	179.101	7.82e-41	3.84e-38	CD4_8hr_vs_unstim	up
OCR_173842	chr9	79919236	79920019	6.22817	3.77344	178.852	8.86e-41	4.32e-38	CD4_8hr_vs_unstim	up
OCR_81362	chr2	58269731	58270142	4.26655	4.35522	178.835	8.94e-41	4.33e-38	CD4_8hr_vs_unstim	up
OCR_74526	chr19	6678540	6679079	5.15161	3.38189	178.838	9.02e-41	4.34e-38	CD4_8hr_vs_unstim	up
OCR_38811	chr12	62650544	62650983	3.55035	4.95285	178.606	1e-40	4.77e-38	CD4_8hr_vs_unstim	up
OCR_150566	chr6	157849669	157850632	5.49895	3.63206	178.625	1e-40	4.77e-38	CD4_8hr_vs_unstim	up
OCR_159049	chr7	114529294	114530422	3.73823	4.83557	178.334	1.15e-40	5.43e-38	CD4_8hr_vs_unstim	up
OCR_122421	chr4	114366882	114367613	4.48037	3.91786	178.301	1.17e-40	5.49e-38	CD4_8hr_vs_unstim	up
OCR_42361	chr12	92458831	92459893	4.22826	4.28118	177.984	1.37e-40	6.4e-38	CD4_8hr_vs_unstim	up
OCR_99809	chr21	26949579	26950044	4.99835	4.22862	177.832	1.48e-40	6.86e-38	CD4_8hr_vs_unstim	up
OCR_169750	chr8	129089937	129090297	6.98555	2.98267	177.618	1.65e-40	7.6e-38	CD4_8hr_vs_unstim	up
OCR_169682	chr8	128710160	128710810	5.6459	3.13273	177.401	1.84e-40	8.42e-38	CD4_8hr_vs_unstim	up
OCR_3650	chr1	66812103	66812532	4.80026	3.62434	177.273	1.96e-40	8.93e-38	CD4_8hr_vs_unstim	up
OCR_165573	chr8	71042534	71043257	5.50861	3.83986	176.747	2.56e-40	1.16e-37	CD4_8hr_vs_unstim	up
OCR_66399	chr17	44361649	44362389	5.45644	3.41596	176.476	3.02e-40	1.36e-37	CD4_8hr_vs_unstim	up
OCR_15253	chr1	225642139	225643066	4.1064	4.2644	175.789	4.13e-40	1.84e-37	CD4_8hr_vs_unstim	up
OCR_71041	chr18	33058407	33059090	4.77192	3.86359	175.798	4.11e-40	1.84e-37	CD4_8hr_vs_unstim	up
OCR_43942	chr12	114399572	114400164	3.8583	4.8669	175.426	4.96e-40	2.19e-37	CD4_8hr_vs_unstim	up
OCR_39042	chr12	65068249	65068835	-3.34807	4.73727	175.411	4.99e-40	2.2e-37	CD4_8hr_vs_unstim	down
OCR_167515	chr8	95254130	95255076	4.15202	4.26446	175.131	5.75e-40	2.51e-37	CD4_8hr_vs_unstim	up
OCR_98431	chr21	15920203	15920832	4.20512	4.24583	174.962	6.26e-40	2.72e-37	CD4_8hr_vs_unstim	up
OCR_20972	chr10	64185555	64186671	4.44601	4.32329	174.939	6.33e-40	2.74e-37	CD4_8hr_vs_unstim	up
OCR_22980	chr10	92954323	92955070	4.71977	3.66582	174.707	7.11e-40	3.06e-37	CD4_8hr_vs_unstim	up
OCR_173170	chr9	37290405	37291627	4.76592	3.95228	174.563	7.65e-40	3.27e-37	CD4_8hr_vs_unstim	up
OCR_133686	chr5	102097755	102098283	3.86847	4.75178	174.461	8.05e-40	3.42e-37	CD4_8hr_vs_unstim	up
OCR_178167	chrX	46184700	46185338	4.89126	3.59079	174.068	9.81e-40	4.15e-37	CD4_8hr_vs_unstim	up
OCR_48466	chr13	77865097	77865914	4.81138	3.9054	173.443	1.34e-39	5.65e-37	CD4_8hr_vs_unstim	up
OCR_102351	chr22	40235852	40236519	5.05833	3.42789	173.387	1.38e-39	5.79e-37	CD4_8hr_vs_unstim	up
OCR_2001	chr1	33490043	33490964	5.48631	3.42932	172.954	1.72e-39	7.14e-37	CD4_8hr_vs_unstim	up
OCR_144505	chr6	90735278	90735990	4.41388	4.2098	172.526	2.13e-39	8.81e-37	CD4_8hr_vs_unstim	up
OCR_4641	chr1	76723523	76724108	5.13367	3.65709	172.313	2.37e-39	9.75e-37	CD4_8hr_vs_unstim	up
OCR_124812	chr4	149033169	149033999	4.05072	4.42355	172.287	2.4e-39	9.82e-37	CD4_8hr_vs_unstim	up
OCR_170688	chr9	3385855	3386309	4.38434	4.23598	171.754	3.14e-39	1.28e-36	CD4_8hr_vs_unstim	up
OCR_76712	chr19	42625450	42627746	3.14792	5.33243	171.709	3.21e-39	1.3e-36	CD4_8hr_vs_unstim	up
OCR_22690	chr10	89521488	89522325	4.71045	3.75315	171.685	3.25e-39	1.31e-36	CD4_8hr_vs_unstim	up
OCR_16896	chr10	3137455	3138247	4.20679	4.19553	171.269	4e-39	1.6e-36	CD4_8hr_vs_unstim	up
OCR_115529	chr3	190335934	190336908	3.75535	4.84782	171.208	4.13e-39	1.65e-36	CD4_8hr_vs_unstim	up
OCR_23244	chr10	98348669	98349146	5.33883	3.82183	171.179	4.19e-39	1.65e-36	CD4_8hr_vs_unstim	up
OCR_140641	chr6	37482177	37482579	4.34157	3.96515	171.179	4.19e-39	1.65e-36	CD4_8hr_vs_unstim	up
OCR_122490	chr4	114743473	114744305	5.18208	4.05483	170.951	4.78e-39	1.88e-36	CD4_8hr_vs_unstim	up
OCR_66200	chr17	42163812	42164823	4.36728	3.65522	170.744	5.21e-39	2.04e-36	CD4_8hr_vs_unstim	up
OCR_18352	chr10	22667588	22668547	3.84359	4.55875	170.634	5.51e-39	2.14e-36	CD4_8hr_vs_unstim	up
OCR_118646	chr4	56184268	56185323	3.71963	4.80255	170.36	6.32e-39	2.44e-36	CD4_8hr_vs_unstim	up
OCR_9028	chr1	149978896	149979174	6.15941	2.76975	170.251	6.68e-39	2.57e-36	CD4_8hr_vs_unstim	up
OCR_87595	chr2	157241734	157242853	4.9568	3.63318	170.127	7.11e-39	2.72e-36	CD4_8hr_vs_unstim	up
OCR_4808	chr1	78506161	78507050	3.86318	4.81272	170.062	7.35e-39	2.8e-36	CD4_8hr_vs_unstim	up
OCR_74623	chr19	7837167	7838192	4.05171	4.22281	169.428	1.01e-38	3.84e-36	CD4_8hr_vs_unstim	up
OCR_141112	chr6	45131740	45132531	4.02828	4.38703	169.393	1.03e-38	3.88e-36	CD4_8hr_vs_unstim	up
OCR_81199	chr2	55817871	55818640	4.77076	3.69445	169.322	1.07e-38	4e-36	CD4_8hr_vs_unstim	up
OCR_129561	chr5	35736320	35736858	5.292	3.56735	169.106	1.2e-38	4.48e-36	CD4_8hr_vs_unstim	up
OCR_33888	chr12	9819933	9820527	4.09884	4.25925	168.465	1.64e-38	6.05e-36	CD4_8hr_vs_unstim	up
OCR_77551	chr19	51992118	51992939	6.10816	2.74856	168.46	1.64e-38	6.05e-36	CD4_8hr_vs_unstim	up
OCR_78598	chr2	12841967	12843094	4.54479	3.76664	168.459	1.64e-38	6.05e-36	CD4_8hr_vs_unstim	up
OCR_109679	chr3	106052678	106053010	4.35944	3.8516	168.446	1.65e-38	6.06e-36	CD4_8hr_vs_unstim	up
OCR_103710	chr3	15352039	15352757	3.89073	4.49271	168.136	1.93e-38	7.05e-36	CD4_8hr_vs_unstim	up
OCR_149296	chr6	141628518	141629130	4.25852	4.14119	167.917	2.16e-38	7.83e-36	CD4_8hr_vs_unstim	up
OCR_137685	chr5	174944011	174945285	4.01265	4.4426	167.823	2.26e-38	8.17e-36	CD4_8hr_vs_unstim	up
OCR_76636	chr19	42041366	42042008	4.42589	3.86915	167.542	2.61e-38	9.37e-36	CD4_8hr_vs_unstim	up
OCR_136962	chr5	158590133	158590899	5.11956	3.2958	167.504	2.66e-38	9.5e-36	CD4_8hr_vs_unstim	up
OCR_89196	chr2	173562767	173563652	3.75002	4.56612	167.384	2.82e-38	1e-35	CD4_8hr_vs_unstim	up
OCR_43943	chr12	114400238	114400592	4.20542	4.45838	167.353	2.87e-38	1.02e-35	CD4_8hr_vs_unstim	up
OCR_175595	chr9	117453010	117454461	3.61069	4.86271	167.178	3.13e-38	1.1e-35	CD4_8hr_vs_unstim	up
OCR_75928	chr19	30195551	30196569	4.84238	4.16226	167.156	3.16e-38	1.11e-35	CD4_8hr_vs_unstim	up
OCR_87985	chr2	161080435	161081234	4.03139	4.45063	166.903	3.59e-38	1.26e-35	CD4_8hr_vs_unstim	up
OCR_138921	chr6	14732835	14733811	3.43993	4.85183	166.604	4.18e-38	1.45e-35	CD4_8hr_vs_unstim	up
OCR_94417	chr2	225875532	225876158	4.67977	3.67587	166.543	4.31e-38	1.49e-35	CD4_8hr_vs_unstim	up
OCR_112564	chr3	150455729	150456089	4.65574	3.78729	166.271	4.94e-38	1.7e-35	CD4_8hr_vs_unstim	up
OCR_17137	chr10	6178100	6178954	4.45433	3.88833	166.135	5.29e-38	1.81e-35	CD4_8hr_vs_unstim	up
OCR_13359	chr1	198850066	198850783	5.00286	3.38251	166.112	5.35e-38	1.83e-35	CD4_8hr_vs_unstim	up
OCR_148981	chr6	138194320	138194923	3.63168	4.64248	166.02	5.63e-38	1.91e-35	CD4_8hr_vs_unstim	up
OCR_135572	chr5	131434742	131435268	4.90645	3.94452	165.816	6.21e-38	2.1e-35	CD4_8hr_vs_unstim	up
OCR_89852	chr2	181971442	181971968	3.92764	4.4703	165.807	6.24e-38	2.1e-35	CD4_8hr_vs_unstim	up
OCR_146342	chr6	111265699	111266452	3.8325	4.69246	165.607	7.1e-38	2.38e-35	CD4_8hr_vs_unstim	up
OCR_3786	chr1	68189196	68189963	4.82617	3.78435	165.416	7.59e-38	2.54e-35	CD4_8hr_vs_unstim	up
OCR_136994	chr5	158883671	158884405	4.53249	4.06776	165.353	7.83e-38	2.61e-35	CD4_8hr_vs_unstim	up
OCR_140647	chr6	37521296	37521859	4.26422	3.98165	165.246	8.27e-38	2.74e-35	CD4_8hr_vs_unstim	up
OCR_87702	chr2	158117529	158118205	3.73566	4.85397	165.223	8.37e-38	2.76e-35	CD4_8hr_vs_unstim	up
OCR_101785	chr22	31045260	31046004	4.08263	4.04007	165.127	8.78e-38	2.88e-35	CD4_8hr_vs_unstim	up
OCR_138673	chr6	11369032	11369424	4.88233	3.47549	164.925	9.72e-38	3.18e-35	CD4_8hr_vs_unstim	up
OCR_9904	chr1	161062142	161062934	4.43355	3.7267	164.79	1.04e-37	3.38e-35	CD4_8hr_vs_unstim	up
OCR_72339	chr18	60826128	60826543	4.42617	3.98267	164.784	1.04e-37	3.38e-35	CD4_8hr_vs_unstim	up
OCR_50200	chr13	99316290	99316839	5.50445	3.44963	164.754	1.06e-37	3.42e-35	CD4_8hr_vs_unstim	up
OCR_2483	chr1	42204545	42205566	3.51021	4.70765	164.103	1.47e-37	4.72e-35	CD4_8hr_vs_unstim	up
OCR_138670	chr6	11364396	11364917	4.50038	3.71106	163.985	1.56e-37	4.99e-35	CD4_8hr_vs_unstim	up
OCR_8103	chr1	110432788	110433519	5.11437	2.97693	163.784	1.72e-37	5.5e-35	CD4_8hr_vs_unstim	up
OCR_130062	chr5	43315461	43315764	5.62664	3.45177	163.534	1.96e-37	6.21e-35	CD4_8hr_vs_unstim	up
OCR_123065	chr4	122177229	122178555	2.90294	5.62851	163.421	2.07e-37	6.55e-35	CD4_8hr_vs_unstim	up
OCR_138210	chr6	3209463	3210520	4.84278	4.05647	163.3	2.2e-37	6.93e-35	CD4_8hr_vs_unstim	up
OCR_58667	chr15	74688823	74689681	4.34662	3.67393	163.211	2.3e-37	7.21e-35	CD4_8hr_vs_unstim	up
OCR_3107	chr1	54865489	54866387	4.64758	3.73053	163.143	2.38e-37	7.44e-35	CD4_8hr_vs_unstim	up
OCR_50016	chr13	95319227	95320134	4.0526	4.41731	162.892	2.7e-37	8.4e-35	CD4_8hr_vs_unstim	up
OCR_2504	chr1	42327996	42329067	4.40431	3.90506	162.534	3.23e-37	1e-34	CD4_8hr_vs_unstim	up
OCR_149558	chr6	143461025	143461473	4.85262	3.55543	162.346	3.55e-37	1.1e-34	CD4_8hr_vs_unstim	up
OCR_1566	chr1	26907259	26908091	5.31198	3.38688	162.276	3.68e-37	1.13e-34	CD4_8hr_vs_unstim	up
OCR_10633	chr1	172606694	172607080	5.20144	3.04027	162.198	3.83e-37	1.17e-34	CD4_8hr_vs_unstim	up
OCR_125683	chr4	164082959	164083319	4.21569	3.7132	162.142	3.94e-37	1.2e-34	CD4_8hr_vs_unstim	up
OCR_7933	chr1	108363462	108364520	3.55742	4.7767	161.599	5.17e-37	1.57e-34	CD4_8hr_vs_unstim	up
OCR_87761	chr2	158333754	158334387	4.97342	3.6063	161.585	5.21e-37	1.58e-34	CD4_8hr_vs_unstim	up
OCR_20967	chr10	64112027	64112975	4.28507	3.99166	161.509	5.41e-37	1.63e-34	CD4_8hr_vs_unstim	up
OCR_19773	chr10	52299930	52300855	4.31357	4.09067	161.478	5.5e-37	1.65e-34	CD4_8hr_vs_unstim	up
OCR_169818	chr8	129696884	129698027	4.75881	3.50935	161.326	5.93e-37	1.77e-34	CD4_8hr_vs_unstim	up
OCR_22800	chr10	90660921	90662113	3.72279	4.50322	161.312	5.98e-37	1.78e-34	CD4_8hr_vs_unstim	up
OCR_149754	chr6	146141068	146141779	5.29035	3.66176	161.057	6.79e-37	2.02e-34	CD4_8hr_vs_unstim	up
OCR_29545	chr11	76082108	76082788	4.29995	3.68581	161.029	6.89e-37	2.04e-34	CD4_8hr_vs_unstim	up
OCR_87943	chr2	160611945	160612910	4.02243	4.15192	160.932	7.23e-37	2.13e-34	CD4_8hr_vs_unstim	up
OCR_79198	chr2	25554493	25554997	5.16761	3.09346	160.852	7.53e-37	2.21e-34	CD4_8hr_vs_unstim	up
OCR_91055	chr2	191583504	191583945	4.4282	3.83958	160.43	9.31e-37	2.72e-34	CD4_8hr_vs_unstim	up
OCR_85497	chr2	134974799	134976046	2.99193	5.48165	160.373	9.58e-37	2.79e-34	CD4_8hr_vs_unstim	up
OCR_38084	chr12	56292740	56293346	4.68275	3.54779	160.226	1.03e-36	2.99e-34	CD4_8hr_vs_unstim	up
OCR_79423	chr2	28806562	28807622	3.8062	4.22228	160.177	1.06e-36	3.05e-34	CD4_8hr_vs_unstim	up
OCR_169753	chr8	129115525	129116377	4.12425	4.11326	160.131	1.08e-36	3.11e-34	CD4_8hr_vs_unstim	up
OCR_74960	chr19	12441995	12442318	4.1776	3.63009	160.036	1.13e-36	3.24e-34	CD4_8hr_vs_unstim	up
OCR_169094	chr8	117658967	117659437	5.0814	3.27378	160.037	1.13e-36	3.24e-34	CD4_8hr_vs_unstim	up
OCR_424	chr1	8663763	8664684	4.00779	4.13556	160.03	1.14e-36	3.25e-34	CD4_8hr_vs_unstim	up
OCR_69577	chr18	2627621	2628276	4.99447	3.45488	159.94	1.19e-36	3.38e-34	CD4_8hr_vs_unstim	up
OCR_134667	chr5	114973491	114974302	4.54991	4.31796	159.932	1.2e-36	3.38e-34	CD4_8hr_vs_unstim	up
OCR_134491	chr5	111491020	111491401	5.07704	3.26548	159.916	1.21e-36	3.39e-34	CD4_8hr_vs_unstim	up
OCR_102353	chr22	40269918	40270320	9.61203	2.21765	159.887	1.22e-36	3.43e-34	CD4_8hr_vs_unstim	up
OCR_15583	chr1	230245476	230246416	2.96657	5.52043	159.86	1.24e-36	3.46e-34	CD4_8hr_vs_unstim	up
OCR_66143	chr17	41419044	41419940	5.53838	3.36852	159.674	1.36e-36	3.79e-34	CD4_8hr_vs_unstim	up
OCR_8895	chr1	145606246	145607015	5.74563	3.33459	159.606	1.41e-36	3.91e-34	CD4_8hr_vs_unstim	up
OCR_51078	chr14	21555441	21556175	-3.51579	4.08714	159.565	1.44e-36	3.97e-34	CD4_8hr_vs_unstim	down
OCR_3748	chr1	67805044	67806070	3.90067	4.54717	159.481	1.5e-36	4.13e-34	CD4_8hr_vs_unstim	up
OCR_65867	chr17	38439884	38440324	4.19551	3.77399	159.297	1.66e-36	4.55e-34	CD4_8hr_vs_unstim	up
OCR_167472	chr8	94815450	94816545	5.12328	3.91305	159.252	1.68e-36	4.6e-34	CD4_8hr_vs_unstim	up
OCR_161580	chr7	144518028	144518686	3.44043	4.8302	159.204	1.72e-36	4.7e-34	CD4_8hr_vs_unstim	up
OCR_19039	chr10	32034313	32035078	3.54853	4.65477	159.182	1.75e-36	4.73e-34	CD4_8hr_vs_unstim	up
OCR_177182	chrX	14045662	14046115	4.3529	3.73053	159.176	1.75e-36	4.73e-34	CD4_8hr_vs_unstim	up
OCR_6241	chr1	92219534	92220564	4.33045	4.18365	159.073	1.84e-36	4.96e-34	CD4_8hr_vs_unstim	up
OCR_169095	chr8	117661784	117662610	4.37422	4.02169	158.765	2.15e-36	5.78e-34	CD4_8hr_vs_unstim	up
OCR_101784	chr22	31039867	31040572	5.52425	3.13094	158.753	2.16e-36	5.79e-34	CD4_8hr_vs_unstim	up
OCR_106585	chr3	71132807	71133544	4.51011	3.74525	158.593	2.34e-36	6.25e-34	CD4_8hr_vs_unstim	up
OCR_25922	chr11	12214307	12214797	-3.63587	3.63967	158.509	2.45e-36	6.5e-34	CD4_8hr_vs_unstim	down
OCR_111017	chr3	122387679	122388695	4.34778	3.84839	158.37	2.62e-36	6.92e-34	CD4_8hr_vs_unstim	up
OCR_115527	chr3	190303481	190305093	3.24447	5.08931	158.371	2.62e-36	6.92e-34	CD4_8hr_vs_unstim	up
OCR_68753	chr17	73246057	73246855	3.69233	4.31669	158.303	2.71e-36	7.14e-34	CD4_8hr_vs_unstim	up
OCR_17025	chr10	4693703	4694731	4.56354	4.02804	158.164	2.91e-36	7.62e-34	CD4_8hr_vs_unstim	up
OCR_13240	chr1	198227403	198228015	4.61216	3.6216	158.152	2.93e-36	7.65e-34	CD4_8hr_vs_unstim	up
OCR_37998	chr12	55257579	55258453	5.04648	3.20745	157.87	3.37e-36	8.78e-34	CD4_8hr_vs_unstim	up
OCR_148362	chr6	130923145	130924142	3.85648	4.29394	157.735	3.61e-36	9.36e-34	CD4_8hr_vs_unstim	up
OCR_140184	chr6	32222472	32223534	3.91405	3.95668	157.684	3.7e-36	9.58e-34	CD4_8hr_vs_unstim	up
OCR_82247	chr2	74058076	74058768	4.48867	3.51082	157.549	4.07e-36	1.05e-33	CD4_8hr_vs_unstim	up
OCR_83131	chr2	85226475	85227197	5.35443	3.35232	157.18	4.77e-36	1.23e-33	CD4_8hr_vs_unstim	up
OCR_91220	chr2	192546906	192547222	5.95582	3.37705	157.011	5.2e-36	1.33e-33	CD4_8hr_vs_unstim	up
OCR_30103	chr11	86303828	86304593	3.26155	5.17851	156.919	5.44e-36	1.39e-33	CD4_8hr_vs_unstim	up
OCR_27887	chr11	43890321	43891219	3.17715	5.19953	156.843	5.67e-36	1.44e-33	CD4_8hr_vs_unstim	up
OCR_14080	chr1	207563052	207563800	5.70478	3.08031	156.784	5.82e-36	1.48e-33	CD4_8hr_vs_unstim	up
OCR_40246	chr12	76337643	76339176	3.07226	5.21612	156.642	6.25e-36	1.58e-33	CD4_8hr_vs_unstim	up
OCR_91057	chr2	191587560	191588005	3.98224	4.18037	156.626	6.31e-36	1.59e-33	CD4_8hr_vs_unstim	up
OCR_165392	chr8	66885865	66886889	4.70652	3.38665	156.603	6.38e-36	1.6e-33	CD4_8hr_vs_unstim	up
OCR_96663	chr20	30305000	30305596	4.31114	3.86889	156.433	6.95e-36	1.73e-33	CD4_8hr_vs_unstim	up
OCR_121694	chr4	103548927	103549591	3.71772	4.43188	156.432	6.95e-36	1.73e-33	CD4_8hr_vs_unstim	up
OCR_15543	chr1	229576411	229577566	4.62337	3.80884	156.402	7.06e-36	1.75e-33	CD4_8hr_vs_unstim	up
OCR_138060	chr6	506310	506966	4.36878	3.67768	156.385	7.12e-36	1.76e-33	CD4_8hr_vs_unstim	up
OCR_110560	chr3	115509581	115510091	3.84203	4.41091	156.309	7.4e-36	1.83e-33	CD4_8hr_vs_unstim	up
OCR_14193	chr1	209897115	209898208	3.52345	4.64015	156.286	7.48e-36	1.84e-33	CD4_8hr_vs_unstim	up
OCR_121873	chr4	105979301	105979835	5.1892	3.48248	156.174	7.91e-36	1.94e-33	CD4_8hr_vs_unstim	up
OCR_138985	chr6	15417960	15418644	5.0819	3.16578	156.064	8.37e-36	2.05e-33	CD4_8hr_vs_unstim	up
OCR_122426	chr4	114395126	114395710	4.87262	3.77859	156.044	8.45e-36	2.06e-33	CD4_8hr_vs_unstim	up
OCR_144610	chr6	91036030	91036972	5.34232	3.45254	156.035	8.49e-36	2.06e-33	CD4_8hr_vs_unstim	up
OCR_23298	chr10	99182628	99183235	4.44297	3.72629	156.02	8.55e-36	2.07e-33	CD4_8hr_vs_unstim	up
OCR_104660	chr3	31118392	31119198	4.61528	3.81072	155.469	1.13e-35	2.72e-33	CD4_8hr_vs_unstim	up
OCR_177229	chrX	15741868	15742745	9.48926	2.50706	155.412	1.16e-35	2.79e-33	CD4_8hr_vs_unstim	up
OCR_99811	chr21	26951607	26951805	5.35902	3.53685	155.34	1.2e-35	2.89e-33	CD4_8hr_vs_unstim	up
OCR_160549	chr7	128602930	128604068	4.50243	3.85802	155.194	1.3e-35	3.1e-33	CD4_8hr_vs_unstim	up
OCR_110199	chr3	111323839	111324613	4.53394	3.35244	154.725	1.64e-35	3.91e-33	CD4_8hr_vs_unstim	up
OCR_9979	chr1	161931861	161932754	3.73037	4.41889	154.545	1.8e-35	4.27e-33	CD4_8hr_vs_unstim	up
OCR_94739	chr2	230686849	230687532	4.14188	4.05143	154.549	1.84e-35	4.35e-33	CD4_8hr_vs_unstim	up
OCR_179519	chrX	107088626	107089448	5.67424	3.0656	154.28	2.05e-35	4.85e-33	CD4_8hr_vs_unstim	up
OCR_153261	chr7	23412548	23413719	3.23063	5.00663	154.245	2.11e-35	4.98e-33	CD4_8hr_vs_unstim	up
OCR_121903	chr4	106227094	106228080	3.90492	4.74484	154.17	2.17e-35	5.09e-33	CD4_8hr_vs_unstim	up
OCR_49805	chr13	91998397	91998630	4.24387	3.81088	154.054	2.3e-35	5.38e-33	CD4_8hr_vs_unstim	up
OCR_23427	chr10	101765928	101766439	4.26072	3.53339	153.79	2.62e-35	6.12e-33	CD4_8hr_vs_unstim	up
OCR_30663	chr11	95801149	95801951	4.07909	3.9242	153.762	2.66e-35	6.19e-33	CD4_8hr_vs_unstim	up
OCR_40252	chr12	76372470	76373399	2.88059	5.43894	153.758	2.67e-35	6.19e-33	CD4_8hr_vs_unstim	up
OCR_179860	chrX	120294474	120295775	3.73491	4.41071	153.683	2.77e-35	6.41e-33	CD4_8hr_vs_unstim	up
OCR_173379	chr9	73081838	73082723	3.95046	4.06448	153.671	2.79e-35	6.42e-33	CD4_8hr_vs_unstim	up
OCR_127084	chr4	185240048	185241092	4.07621	4.05766	153.651	2.82e-35	6.47e-33	CD4_8hr_vs_unstim	up
OCR_78442	chr2	10793890	10794539	4.14352	3.86532	153.541	2.98e-35	6.82e-33	CD4_8hr_vs_unstim	up
OCR_129527	chr5	34923854	34924500	4.30107	3.85311	153.511	3.02e-35	6.9e-33	CD4_8hr_vs_unstim	up
OCR_94565	chr2	228246856	228247693	4.81415	3.38817	153.493	3.05e-35	6.94e-33	CD4_8hr_vs_unstim	up
OCR_33492	chr12	4255085	4255944	4.48195	4.05949	153.446	3.12e-35	7.09e-33	CD4_8hr_vs_unstim	up
OCR_28729	chr11	63435425	63435877	5.13763	2.91125	153.401	3.19e-35	7.23e-33	CD4_8hr_vs_unstim	up
OCR_14740	chr1	217799710	217799996	4.73494	3.55075	153.364	3.25e-35	7.34e-33	CD4_8hr_vs_unstim	up
OCR_38053	chr12	56017653	56018486	5.07039	3.41817	153.35	3.28e-35	7.37e-33	CD4_8hr_vs_unstim	up
OCR_94301	chr2	224806228	224806920	3.38388	4.80753	153.317	3.33e-35	7.47e-33	CD4_8hr_vs_unstim	up
OCR_6357	chr1	93494676	93495405	-3.35209	4.17543	153.282	3.39e-35	7.59e-33	CD4_8hr_vs_unstim	down
OCR_144552	chr6	90854668	90855144	4.45862	3.72885	153.117	3.68e-35	8.22e-33	CD4_8hr_vs_unstim	up
OCR_162186	chr7	151110994	151111896	4.54614	3.52426	152.615	4.74e-35	1.05e-32	CD4_8hr_vs_unstim	up
OCR_169999	chr8	133715188	133716833	3.4268	4.68683	152.564	4.86e-35	1.08e-32	CD4_8hr_vs_unstim	up
OCR_42459	chr12	92945384	92946133	4.25414	3.69567	152.375	5.35e-35	1.18e-32	CD4_8hr_vs_unstim	up
OCR_37323	chr12	47749662	47750617	3.88964	4.1618	152.331	5.52e-35	1.22e-32	CD4_8hr_vs_unstim	up
OCR_58207	chr15	65541812	65542599	4.38286	3.70913	152.105	6.13e-35	1.35e-32	CD4_8hr_vs_unstim	up
OCR_177537	chrX	22078689	22079140	7.35185	2.82136	152.088	6.18e-35	1.36e-32	CD4_8hr_vs_unstim	up
OCR_131616	chr5	74862282	74863047	4.13217	4.03998	151.942	6.65e-35	1.45e-32	CD4_8hr_vs_unstim	up
OCR_43440	chr12	105065103	105065929	3.56787	4.49507	151.902	6.79e-35	1.48e-32	CD4_8hr_vs_unstim	up
OCR_122496	chr4	114790837	114791717	3.75843	4.50522	151.804	7.13e-35	1.55e-32	CD4_8hr_vs_unstim	up
OCR_53206	chr14	53657536	53658150	4.87676	3.63419	151.793	7.17e-35	1.55e-32	CD4_8hr_vs_unstim	up
OCR_14982	chr1	221613163	221613978	3.41031	4.75616	151.654	7.83e-35	1.69e-32	CD4_8hr_vs_unstim	up
OCR_22767	chr10	90430130	90430891	4.50985	3.7733	151.419	8.65e-35	1.87e-32	CD4_8hr_vs_unstim	up
OCR_153126	chr7	21378168	21378982	3.11344	5.0796	151.304	9.17e-35	1.97e-32	CD4_8hr_vs_unstim	up
OCR_85662	chr2	136893729	136894466	-2.62991	5.65453	151.185	9.73e-35	2.08e-32	CD4_8hr_vs_unstim	down
OCR_134824	chr5	118371827	118372505	5.64289	3.07746	151.181	9.75e-35	2.08e-32	CD4_8hr_vs_unstim	up
OCR_150393	chr6	155506709	155507590	4.12643	4.03588	151.145	9.93e-35	2.12e-32	CD4_8hr_vs_unstim	up
OCR_92140	chr2	198909291	198909888	4.94285	3.1009	151.071	1.03e-34	2.19e-32	CD4_8hr_vs_unstim	up
OCR_103387	chr3	9819498	9820551	4.35947	3.82057	151.037	1.05e-34	2.22e-32	CD4_8hr_vs_unstim	up
OCR_140002	chr6	30736449	30737726	3.07198	5.02646	151.007	1.06e-34	2.25e-32	CD4_8hr_vs_unstim	up
OCR_110055	chr3	109645859	109646537	5.16824	3.4646	150.993	1.07e-34	2.26e-32	CD4_8hr_vs_unstim	up
OCR_99791	chr21	26859287	26859993	4.57073	3.84565	150.982	1.08e-34	2.27e-32	CD4_8hr_vs_unstim	up
OCR_66261	chr17	43049326	43049932	4.08636	3.49983	150.975	1.08e-34	2.27e-32	CD4_8hr_vs_unstim	up
OCR_91064	chr2	191628626	191629324	3.68282	4.19724	150.787	1.19e-34	2.49e-32	CD4_8hr_vs_unstim	up
OCR_138428	chr6	6918678	6919202	3.62246	4.49618	150.692	1.25e-34	2.6e-32	CD4_8hr_vs_unstim	up
OCR_120453	chr4	83826457	83826948	4.09727	3.95735	150.659	1.27e-34	2.64e-32	CD4_8hr_vs_unstim	up
OCR_37783	chr12	53038842	53040480	-3.01472	4.87449	150.643	1.28e-34	2.65e-32	CD4_8hr_vs_unstim	down
OCR_35812	chr12	27613081	27614172	3.87245	3.94144	149.962	1.8e-34	3.72e-32	CD4_8hr_vs_unstim	up
OCR_73585	chr18	71806671	71807525	4.32072	3.87282	149.93	1.83e-34	3.77e-32	CD4_8hr_vs_unstim	up
OCR_65328	chr17	30246610	30247733	4.92888	3.43778	149.857	1.9e-34	3.9e-32	CD4_8hr_vs_unstim	up
OCR_148989	chr6	138229885	138230313	4.59007	3.13694	149.834	1.92e-34	3.94e-32	CD4_8hr_vs_unstim	up
OCR_81716	chr2	64552590	64552973	3.77258	4.03234	149.78	1.97e-34	4.04e-32	CD4_8hr_vs_unstim	up
OCR_160080	chr7	123463888	123465182	2.99433	5.42523	149.773	1.98e-34	4.04e-32	CD4_8hr_vs_unstim	up
OCR_19187	chr10	33654221	33655398	4.38998	3.76749	149.755	2e-34	4.07e-32	CD4_8hr_vs_unstim	up
OCR_35687	chr12	26012799	26013446	-3.24183	4.29421	149.599	2.16e-34	4.39e-32	CD4_8hr_vs_unstim	down
OCR_19175	chr10	33541679	33542103	4.94509	3.35438	149.585	2.18e-34	4.41e-32	CD4_8hr_vs_unstim	up
OCR_13909	chr1	205741763	205742237	4.60593	3.39118	149.503	2.27e-34	4.58e-32	CD4_8hr_vs_unstim	up
OCR_62390	chr16	67345470	67346314	4.90993	3.6946	149.422	2.36e-34	4.76e-32	CD4_8hr_vs_unstim	up
OCR_169645	chr8	128228066	128229102	4.55918	3.50398	149.241	2.59e-34	5.2e-32	CD4_8hr_vs_unstim	up
OCR_69704	chr18	3624697	3625513	3.39214	4.59799	149.2	2.64e-34	5.29e-32	CD4_8hr_vs_unstim	up
OCR_74523	chr19	6669389	6670675	2.98798	5.11624	149.056	2.84e-34	5.68e-32	CD4_8hr_vs_unstim	up
OCR_114721	chr3	177055271	177056101	4.04867	4.08002	148.918	3.04e-34	6.07e-32	CD4_8hr_vs_unstim	up
OCR_2706	chr1	45711914	45712902	4.00194	3.65059	148.902	3.07e-34	6.1e-32	CD4_8hr_vs_unstim	up
OCR_99777	chr21	26800699	26801336	4.54362	3.93056	148.783	3.26e-34	6.46e-32	CD4_8hr_vs_unstim	up
OCR_170787	chr9	4832841	4833583	4.4453	3.52096	148.761	3.29e-34	6.51e-32	CD4_8hr_vs_unstim	up
OCR_168275	chr8	109255168	109255811	3.80463	3.98798	148.672	3.45e-34	6.8e-32	CD4_8hr_vs_unstim	up
OCR_125730	chr4	164816471	164817114	-3.32122	4.39074	148.589	3.59e-34	7.07e-32	CD4_8hr_vs_unstim	down
OCR_169751	chr8	129090347	129090842	5.80853	2.89375	148.484	3.79e-34	7.43e-32	CD4_8hr_vs_unstim	up
OCR_134895	chr5	118733151	118733913	3.86425	4.16949	148.428	3.9e-34	7.63e-32	CD4_8hr_vs_unstim	up
OCR_6283	chr1	92798963	92799858	5.22194	3.02758	148.296	4.16e-34	8.13e-32	CD4_8hr_vs_unstim	up
OCR_59565	chr15	92612442	92613524	4.11178	3.77069	148.27	4.22e-34	8.21e-32	CD4_8hr_vs_unstim	up
OCR_31833	chr11	107433526	107433889	4.8434	3.2654	148.09	4.62e-34	8.97e-32	CD4_8hr_vs_unstim	up
OCR_58011	chr15	63504252	63505233	4.02124	3.98807	148.099	4.65e-34	9.02e-32	CD4_8hr_vs_unstim	up
OCR_67534	chr17	58017957	58019034	4.73813	3.29025	148.027	4.76e-34	9.21e-32	CD4_8hr_vs_unstim	up
OCR_80283	chr2	42647803	42648560	4.59616	3.28764	148.022	4.78e-34	9.21e-32	CD4_8hr_vs_unstim	up
OCR_170842	chr9	5455225	5455585	4.63512	3.41646	147.998	4.83e-34	9.3e-32	CD4_8hr_vs_unstim	up
OCR_30203	chr11	88090308	88090959	3.847	4.32941	147.956	4.94e-34	9.47e-32	CD4_8hr_vs_unstim	up
OCR_90924	chr2	190309125	190309564	4.14078	4.04264	147.883	5.12e-34	9.81e-32	CD4_8hr_vs_unstim	up
OCR_57073	chr15	44925135	44925748	4.99616	3.14893	147.864	5.17e-34	9.87e-32	CD4_8hr_vs_unstim	up
OCR_154640	chr7	50236494	50237812	3.86193	4.0105	147.848	5.22e-34	9.93e-32	CD4_8hr_vs_unstim	up
OCR_67479	chr17	57438716	57439169	4.32412	3.25467	147.782	5.39e-34	1.02e-31	CD4_8hr_vs_unstim	up
OCR_121889	chr4	106112688	106113385	3.90097	4.47214	147.76	5.45e-34	1.03e-31	CD4_8hr_vs_unstim	up
OCR_66350	chr17	44128969	44129944	5.55098	2.91689	147.625	5.83e-34	1.1e-31	CD4_8hr_vs_unstim	up
OCR_97223	chr20	42379700	42380366	4.26872	3.89143	147.521	6.15e-34	1.16e-31	CD4_8hr_vs_unstim	up
OCR_179865	chrX	120441934	120442711	3.70033	4.51637	147.343	6.72e-34	1.26e-31	CD4_8hr_vs_unstim	up
OCR_58128	chr15	64735964	64737093	3.91356	3.8299	146.99	8.03e-34	1.51e-31	CD4_8hr_vs_unstim	up
OCR_75259	chr19	15411470	15412171	4.6977	3.01527	146.875	8.51e-34	1.59e-31	CD4_8hr_vs_unstim	up
OCR_55026	chr14	89888540	89888983	4.75961	3.22304	146.855	8.59e-34	1.6e-31	CD4_8hr_vs_unstim	up
OCR_17365	chr10	8296319	8296805	4.92909	3.40341	146.85	8.62e-34	1.6e-31	CD4_8hr_vs_unstim	up
OCR_132510	chr5	88123704	88124562	3.43271	4.5703	146.743	9.09e-34	1.69e-31	CD4_8hr_vs_unstim	up
OCR_68115	chr17	65427455	65428135	4.07104	3.71908	146.593	9.8e-34	1.82e-31	CD4_8hr_vs_unstim	up
OCR_120231	chr4	80752902	80753763	4.48127	3.98492	146.585	9.87e-34	1.83e-31	CD4_8hr_vs_unstim	up
OCR_60002	chr16	575594	576061	4.43895	3.5162	146.558	9.99e-34	1.84e-31	CD4_8hr_vs_unstim	up
OCR_6056	chr1	90069074	90069672	3.4949	4.43151	146.411	1.07e-33	1.98e-31	CD4_8hr_vs_unstim	up
OCR_105987	chr3	56896486	56897290	4.79729	3.28729	146.387	1.09e-33	2e-31	CD4_8hr_vs_unstim	up
OCR_41948	chr12	89556269	89557033	3.25022	4.81385	146.281	1.15e-33	2.1e-31	CD4_8hr_vs_unstim	up
OCR_161262	chr7	139615906	139617234	3.58512	4.34176	146.283	1.15e-33	2.1e-31	CD4_8hr_vs_unstim	up
OCR_180626	chrX	149650866	149651478	5.38226	2.97308	146.244	1.17e-33	2.13e-31	CD4_8hr_vs_unstim	up
OCR_59027	chr15	81247856	81248582	5.07324	3.11959	146.224	1.18e-33	2.15e-31	CD4_8hr_vs_unstim	up
OCR_62757	chr16	75045387	75046300	4.16635	3.7483	146.166	1.22e-33	2.2e-31	CD4_8hr_vs_unstim	up
OCR_155776	chr7	79848039	79848572	5.58024	2.83587	146.146	1.23e-33	2.22e-31	CD4_8hr_vs_unstim	up
OCR_95275	chr2	239347772	239348884	4.1759	3.58472	146.132	1.24e-33	2.23e-31	CD4_8hr_vs_unstim	up
OCR_18800	chr10	28580741	28581339	4.08055	3.72529	146.122	1.24e-33	2.24e-31	CD4_8hr_vs_unstim	up
OCR_123224	chr4	124593177	124593538	4.99785	3.33914	146.086	1.27e-33	2.28e-31	CD4_8hr_vs_unstim	up
OCR_58986	chr15	80258144	80258853	4.69127	3.46893	146.005	1.32e-33	2.36e-31	CD4_8hr_vs_unstim	up
OCR_111898	chr3	142217068	142218078	4.50855	3.84641	145.951	1.35e-33	2.42e-31	CD4_8hr_vs_unstim	up
OCR_160578	chr7	129078626	129079223	5.13513	3.5266	145.72	1.52e-33	2.71e-31	CD4_8hr_vs_unstim	up
OCR_106550	chr3	70905419	70906354	9.36332	2.76885	145.552	1.66e-33	2.95e-31	CD4_8hr_vs_unstim	up
OCR_166440	chr8	82371640	82372189	4.33068	3.65922	145.527	1.68e-33	2.98e-31	CD4_8hr_vs_unstim	up
OCR_149750	chr6	146052618	146052847	5.09459	2.74092	145.347	1.84e-33	3.25e-31	CD4_8hr_vs_unstim	up
OCR_56937	chr15	41782526	41782919	5.40756	2.9903	145.252	1.93e-33	3.4e-31	CD4_8hr_vs_unstim	up
OCR_111014	chr3	122328462	122329326	3.87487	4.2857	144.931	2.26e-33	3.99e-31	CD4_8hr_vs_unstim	up
OCR_65220	chr17	28699646	28700319	4.85434	2.92491	144.728	2.51e-33	4.41e-31	CD4_8hr_vs_unstim	up
OCR_124704	chr4	146860643	146861464	3.27594	4.7358	144.613	2.65e-33	4.66e-31	CD4_8hr_vs_unstim	up
OCR_56733	chr15	38848085	38848623	3.63251	4.20405	144.416	2.93e-33	5.14e-31	CD4_8hr_vs_unstim	up
OCR_12488	chr1	193448206	193448911	-2.73855	5.2618	144.185	3.29e-33	5.76e-31	CD4_8hr_vs_unstim	down
OCR_3784	chr1	68166088	68167171	4.24703	3.63595	144.178	3.3e-33	5.76e-31	CD4_8hr_vs_unstim	up
OCR_177569	chrX	23680840	23681425	4.02223	3.90942	144.17	3.32e-33	5.77e-31	CD4_8hr_vs_unstim	up
OCR_2125	chr1	36766138	36766628	4.17588	3.36931	143.998	3.62e-33	6.28e-31	CD4_8hr_vs_unstim	up
OCR_94384	chr2	225789871	225790902	3.4593	4.57322	143.877	3.84e-33	6.66e-31	CD4_8hr_vs_unstim	up
OCR_28382	chr11	58359984	58360825	3.5894	4.26334	143.784	4.03e-33	6.96e-31	CD4_8hr_vs_unstim	up
OCR_9695	chr1	158938928	158939511	4.95693	3.58295	143.738	4.12e-33	7.1e-31	CD4_8hr_vs_unstim	up
OCR_173535	chr9	75730984	75731523	4.48722	3.89992	143.735	4.13e-33	7.1e-31	CD4_8hr_vs_unstim	up
OCR_94426	chr2	225902834	225903362	3.95568	3.89952	143.704	4.19e-33	7.2e-31	CD4_8hr_vs_unstim	up
OCR_59359	chr15	89710490	89711664	4.31067	3.57002	143.682	4.24e-33	7.26e-31	CD4_8hr_vs_unstim	up
OCR_149300	chr6	141647500	141648409	2.89006	5.3423	145.777	4.29e-33	7.34e-31	CD4_8hr_vs_unstim	up
OCR_50981	chr13	114908037	114909103	-2.9554	4.75514	143.644	4.32e-33	7.37e-31	CD4_8hr_vs_unstim	down
OCR_170731	chr9	4306607	4307272	4.69286	3.32201	143.612	4.39e-33	7.47e-31	CD4_8hr_vs_unstim	up
OCR_167944	chr8	103547690	103548758	2.9315	5.16172	143.56	4.51e-33	7.66e-31	CD4_8hr_vs_unstim	up
OCR_99814	chr21	26955205	26955638	3.82673	3.75462	143.492	4.67e-33	7.9e-31	CD4_8hr_vs_unstim	up
OCR_3589	chr1	66277602	66278196	3.71163	4.60887	143.397	4.89e-33	8.27e-31	CD4_8hr_vs_unstim	up
OCR_17631	chr10	12164408	12165164	4.32852	4.03331	143.377	4.95e-33	8.34e-31	CD4_8hr_vs_unstim	up
OCR_92664	chr2	204884214	204884854	4.74208	3.28567	143.284	5.18e-33	8.72e-31	CD4_8hr_vs_unstim	up
OCR_137997	chr6	193685	194403	3.33409	4.46523	143.205	5.39e-33	9.05e-31	CD4_8hr_vs_unstim	up
OCR_3619	chr1	66709029	66709950	3.59156	4.43997	143.191	5.43e-33	9.09e-31	CD4_8hr_vs_unstim	up
OCR_61552	chr16	48192105	48192703	5.50283	3.2945	143.114	5.65e-33	9.44e-31	CD4_8hr_vs_unstim	up
OCR_117784	chr4	36387410	36388333	-2.63118	5.45589	143.051	5.83e-33	9.72e-31	CD4_8hr_vs_unstim	down
OCR_30513	chr11	93885299	93885922	3.89224	4.01289	142.947	6.14e-33	1.02e-30	CD4_8hr_vs_unstim	up
OCR_45379	chr13	31004155	31005094	4.09177	3.6844	142.86	6.41e-33	1.07e-30	CD4_8hr_vs_unstim	up
OCR_87760	chr2	158330102	158330441	4.59958	3.27015	142.845	6.46e-33	1.07e-30	CD4_8hr_vs_unstim	up
OCR_80423	chr2	44805535	44806882	4.10428	3.76241	142.817	6.56e-33	1.08e-30	CD4_8hr_vs_unstim	up
OCR_144631	chr6	91176140	91177026	3.99943	4.00841	142.804	6.6e-33	1.09e-30	CD4_8hr_vs_unstim	up
OCR_118406	chr4	48038351	48039123	3.62884	4.34468	142.766	6.73e-33	1.11e-30	CD4_8hr_vs_unstim	up
OCR_112565	chr3	150456175	150456495	4.34107	3.42594	142.603	7.3e-33	1.2e-30	CD4_8hr_vs_unstim	up
OCR_2224	chr1	38999367	39000228	5.04457	3.13865	142.559	7.46e-33	1.22e-30	CD4_8hr_vs_unstim	up
OCR_74705	chr19	8812559	8813316	4.01324	3.41187	142.536	7.55e-33	1.23e-30	CD4_8hr_vs_unstim	up
OCR_455	chr1	8933648	8934003	4.04175	3.47509	142.201	8.94e-33	1.46e-30	CD4_8hr_vs_unstim	up
OCR_45341	chr13	30532619	30532982	-3.94035	2.62578	142.202	8.95e-33	1.46e-30	CD4_8hr_vs_unstim	down
OCR_83222	chr2	86265342	86265926	-3.09529	4.41048	142.024	9.77e-33	1.59e-30	CD4_8hr_vs_unstim	down
OCR_67726	chr17	61352603	61353280	4.57308	3.35919	141.931	1.02e-32	1.66e-30	CD4_8hr_vs_unstim	up
OCR_148228	chr6	129822344	129823189	3.94547	3.66892	141.85	1.07e-32	1.73e-30	CD4_8hr_vs_unstim	up
OCR_121657	chr4	103442809	103443694	3.38993	4.55722	141.805	1.09e-32	1.76e-30	CD4_8hr_vs_unstim	up
OCR_2492	chr1	42248536	42249458	4.11246	3.47851	141.784	1.1e-32	1.78e-30	CD4_8hr_vs_unstim	up
OCR_28110	chr11	47684491	47685251	5.1487	3.58408	141.639	1.19e-32	1.91e-30	CD4_8hr_vs_unstim	up
OCR_151439	chr7	2797352	2798454	3.53683	4.30865	142.171	1.19e-32	1.91e-30	CD4_8hr_vs_unstim	up
OCR_54172	chr14	70151619	70152369	4.36814	3.58344	141.615	1.2e-32	1.92e-30	CD4_8hr_vs_unstim	up
OCR_145234	chr6	97497128	97497992	3.30788	4.59233	141.6	1.21e-32	1.93e-30	CD4_8hr_vs_unstim	up
OCR_148351	chr6	130838486	130838995	3.82789	3.9104	141.555	1.24e-32	1.97e-30	CD4_8hr_vs_unstim	up
OCR_173029	chr9	34992370	34992689	4.74733	3.00808	141.559	1.23e-32	1.97e-30	CD4_8hr_vs_unstim	up
OCR_79396	chr2	28498867	28499523	4.9702	2.72124	141.509	1.27e-32	2.01e-30	CD4_8hr_vs_unstim	up
OCR_64976	chr17	25798709	25799531	3.64528	4.40105	141.459	1.3e-32	2.06e-30	CD4_8hr_vs_unstim	up
OCR_63728	chr17	2098901	2099555	4.33194	3.29405	141.406	1.33e-32	2.11e-30	CD4_8hr_vs_unstim	up
OCR_101856	chr22	32042136	32043101	4.98382	3.03796	141.35	1.37e-32	2.16e-30	CD4_8hr_vs_unstim	up
OCR_149608	chr6	144127446	144128154	4.80097	3.20453	141.345	1.38e-32	2.16e-30	CD4_8hr_vs_unstim	up
OCR_176865	chrX	2628052	2629034	3.05656	4.9926	141.345	1.37e-32	2.16e-30	CD4_8hr_vs_unstim	up
OCR_38113	chr12	56433891	56434308	6.47048	2.58212	141.315	1.4e-32	2.19e-30	CD4_8hr_vs_unstim	up
OCR_1411	chr1	25444881	25445772	4.75037	2.79045	141.256	1.44e-32	2.25e-30	CD4_8hr_vs_unstim	up
OCR_44381	chr12	123217775	123218597	4.27105	3.32212	141.244	1.45e-32	2.26e-30	CD4_8hr_vs_unstim	up
OCR_53073	chr14	51726788	51727519	6.46776	2.9353	141.125	1.54e-32	2.39e-30	CD4_8hr_vs_unstim	up
OCR_160691	chr7	130654755	130655528	4.53152	3.50319	141.036	1.61e-32	2.5e-30	CD4_8hr_vs_unstim	up
OCR_2259	chr1	39651277	39651794	4.3453	3.14739	140.804	1.81e-32	2.81e-30	CD4_8hr_vs_unstim	up
OCR_22727	chr10	89824723	89825751	-2.78698	5.0449	140.797	1.81e-32	2.81e-30	CD4_8hr_vs_unstim	down
OCR_138924	chr6	14743740	14744676	3.93114	3.65426	140.794	1.81e-32	2.81e-30	CD4_8hr_vs_unstim	up
OCR_88202	chr2	162915592	162916269	2.91453	5.18129	140.778	1.83e-32	2.82e-30	CD4_8hr_vs_unstim	up
OCR_173031	chr9	35001658	35002436	5.00705	2.84737	140.765	1.84e-32	2.84e-30	CD4_8hr_vs_unstim	up
OCR_51938	chr14	35756598	35757148	4.51886	3.67687	140.753	1.85e-32	2.85e-30	CD4_8hr_vs_unstim	up
OCR_65218	chr17	28690520	28691351	2.69391	5.48883	140.74	1.87e-32	2.86e-30	CD4_8hr_vs_unstim	up
OCR_87798	chr2	158711898	158712844	4.6114	3.01465	140.737	1.87e-32	2.86e-30	CD4_8hr_vs_unstim	up
OCR_144584	chr6	90932394	90932778	4.58194	3.1007	140.69	1.91e-32	2.92e-30	CD4_8hr_vs_unstim	up
OCR_136964	chr5	158605817	158606411	4.38305	3.305	140.538	2.06e-32	3.15e-30	CD4_8hr_vs_unstim	up
OCR_19277	chr10	35508125	35508710	4.19693	3.50669	140.501	2.1e-32	3.2e-30	CD4_8hr_vs_unstim	up
OCR_8317	chr1	113278351	113279071	6.11754	2.82763	140.472	2.13e-32	3.24e-30	CD4_8hr_vs_unstim	up
OCR_63993	chr17	6278066	6278634	4.56732	3.3765	140.45	2.16e-32	3.27e-30	CD4_8hr_vs_unstim	up
OCR_120232	chr4	80772599	80773399	5.18129	3.1522	140.225	2.42e-32	3.66e-30	CD4_8hr_vs_unstim	up
OCR_150453	chr6	156571595	156572150	4.16282	3.46667	140.185	2.46e-32	3.72e-30	CD4_8hr_vs_unstim	up
OCR_154644	chr7	50249115	50249797	3.45116	4.313	140.181	2.47e-32	3.72e-30	CD4_8hr_vs_unstim	up
OCR_68025	chr17	64462889	64463489	5.13646	2.92685	140.103	2.57e-32	3.86e-30	CD4_8hr_vs_unstim	up
OCR_79984	chr2	38098688	38099454	4.38205	3.44222	139.981	2.73e-32	4.1e-30	CD4_8hr_vs_unstim	up
OCR_864	chr1	16292327	16293213	3.36917	4.48183	139.899	2.85e-32	4.26e-30	CD4_8hr_vs_unstim	up
OCR_116125	chr4	2747641	2748540	3.62161	4.3486	139.808	2.98e-32	4.46e-30	CD4_8hr_vs_unstim	up
OCR_2498	chr1	42271538	42273087	2.95233	4.96789	139.695	3.15e-32	4.71e-30	CD4_8hr_vs_unstim	up
OCR_110404	chr3	113436252	113437228	4.17029	3.26506	139.549	3.4e-32	5.06e-30	CD4_8hr_vs_unstim	up
OCR_7138	chr1	101917470	101918146	3.3741	4.78392	139.333	3.79e-32	5.63e-30	CD4_8hr_vs_unstim	up
OCR_24114	chr10	112288291	112289272	3.52982	4.28737	139.28	3.89e-32	5.77e-30	CD4_8hr_vs_unstim	up
OCR_24116	chr10	112295637	112296664	3.31293	4.43372	139.216	4.02e-32	5.94e-30	CD4_8hr_vs_unstim	up
OCR_156773	chr7	87203582	87204523	3.93097	3.51889	139.077	4.31e-32	6.36e-30	CD4_8hr_vs_unstim	up
OCR_105463	chr3	45911443	45912102	-3.02668	4.45454	138.895	4.72e-32	6.96e-30	CD4_8hr_vs_unstim	down
OCR_50929	chr13	114288457	114289603	-3.76597	2.75199	138.887	4.74e-32	6.97e-30	CD4_8hr_vs_unstim	down
OCR_13967	chr1	206751466	206751972	3.67551	3.80658	138.817	4.91e-32	7.21e-30	CD4_8hr_vs_unstim	up
OCR_30089	chr11	85997888	85998777	4.96262	4.06053	138.788	4.98e-32	7.3e-30	CD4_8hr_vs_unstim	up
OCR_42456	chr12	92932461	92933694	3.5026	4.11016	138.684	5.25e-32	7.68e-30	CD4_8hr_vs_unstim	up
OCR_77013	chr19	46618533	46619245	6.01453	2.51505	138.592	5.5e-32	8.03e-30	CD4_8hr_vs_unstim	up
OCR_14006	chr1	206967646	206968742	4.44979	3.00436	138.547	5.62e-32	8.2e-30	CD4_8hr_vs_unstim	up
OCR_169114	chr8	117740727	117741210	3.99641	3.82241	138.463	5.86e-32	8.53e-30	CD4_8hr_vs_unstim	up
OCR_10552	chr1	171762944	171763897	3.50696	4.12319	138.439	5.93e-32	8.62e-30	CD4_8hr_vs_unstim	up
OCR_101039	chr21	47238270	47239352	3.6733	3.87721	138.445	6e-32	8.7e-30	CD4_8hr_vs_unstim	up
OCR_65322	chr17	30205217	30206130	4.67719	3.15748	138.396	6.07e-32	8.78e-30	CD4_8hr_vs_unstim	up
OCR_25744	chr11	9587350	9588002	4.23422	3.49676	138.225	6.62e-32	9.56e-30	CD4_8hr_vs_unstim	up
OCR_101151	chr22	18155411	18156314	4.6454	2.94571	138.139	6.9e-32	9.95e-30	CD4_8hr_vs_unstim	up
OCR_48	chr1	1143383	1144795	3.23484	4.6406	138.115	6.99e-32	1.01e-29	CD4_8hr_vs_unstim	up
OCR_1261	chr1	23950947	23951252	5.23395	2.58714	138.059	7.19e-32	1.03e-29	CD4_8hr_vs_unstim	up
OCR_65581	chr17	34879967	34880948	5.27472	2.66269	138.028	7.3e-32	1.05e-29	CD4_8hr_vs_unstim	up
OCR_86374	chr2	144971065	144971773	5.24034	2.98235	137.941	7.63e-32	1.09e-29	CD4_8hr_vs_unstim	up
OCR_116841	chr4	22502491	22504200	3.67324	4.31919	137.896	7.8e-32	1.11e-29	CD4_8hr_vs_unstim	up
OCR_169733	chr8	129002503	129002974	4.68219	3.11099	137.664	8.77e-32	1.25e-29	CD4_8hr_vs_unstim	up
OCR_10328	chr1	168377957	168378583	3.64043	3.98854	137.616	8.98e-32	1.28e-29	CD4_8hr_vs_unstim	up
OCR_76829	chr19	44280425	44280823	3.99747	3.46936	137.615	8.99e-32	1.28e-29	CD4_8hr_vs_unstim	up
OCR_148293	chr6	130347919	130348413	4.88038	3.36295	137.608	9.02e-32	1.28e-29	CD4_8hr_vs_unstim	up
OCR_51021	chr14	20868776	20869986	4.47333	3.16801	137.58	9.15e-32	1.29e-29	CD4_8hr_vs_unstim	up
OCR_65075	chr17	27065459	27066238	3.89285	3.42936	137.573	9.18e-32	1.3e-29	CD4_8hr_vs_unstim	up
OCR_175414	chr9	114678465	114678978	4.26936	3.3855	137.53	9.38e-32	1.32e-29	CD4_8hr_vs_unstim	up
OCR_30557	chr11	94817714	94817999	5.98994	2.75021	137.301	1.05e-31	1.48e-29	CD4_8hr_vs_unstim	up
OCR_162305	chr7	154990081	154991157	5.08954	2.92444	137.275	1.07e-31	1.5e-29	CD4_8hr_vs_unstim	up
OCR_17120	chr10	6100400	6101037	5.07727	3.14513	137.128	1.15e-31	1.61e-29	CD4_8hr_vs_unstim	up
OCR_118070	chr4	40911369	40911972	3.96044	3.72848	137.108	1.16e-31	1.62e-29	CD4_8hr_vs_unstim	up
OCR_169190	chr8	119068342	119069101	3.78384	4.12573	137.054	1.19e-31	1.66e-29	CD4_8hr_vs_unstim	up
OCR_170843	chr9	5459282	5460035	4.83445	3.30873	136.965	1.25e-31	1.74e-29	CD4_8hr_vs_unstim	up
OCR_33247	chr12	778223	778651	3.85342	3.68719	136.945	1.26e-31	1.75e-29	CD4_8hr_vs_unstim	up
OCR_95183	chr2	238336541	238337319	3.45019	4.36334	136.896	1.29e-31	1.79e-29	CD4_8hr_vs_unstim	up
OCR_105550	chr3	47000317	47001219	3.41337	4.17378	136.848	1.32e-31	1.83e-29	CD4_8hr_vs_unstim	up
OCR_27290	chr11	35095191	35095735	6.45312	2.77286	136.833	1.33e-31	1.84e-29	CD4_8hr_vs_unstim	up
OCR_79150	chr2	24800289	24800939	4.43135	3.23107	136.826	1.34e-31	1.85e-29	CD4_8hr_vs_unstim	up
OCR_178146	chrX	45683571	45684404	4.74607	2.92471	136.741	1.4e-31	1.92e-29	CD4_8hr_vs_unstim	up
OCR_42684	chr12	94851108	94851374	5.42268	2.53388	136.656	1.46e-31	2.01e-29	CD4_8hr_vs_unstim	up
OCR_92392	chr2	201991515	201991960	3.76003	3.77518	136.649	1.46e-31	2.01e-29	CD4_8hr_vs_unstim	up
OCR_170839	chr9	5446956	5447174	4.84475	2.84041	136.641	1.47e-31	2.01e-29	CD4_8hr_vs_unstim	up
OCR_61888	chr16	56978606	56979640	4.11887	3.77173	136.548	1.54e-31	2.1e-29	CD4_8hr_vs_unstim	up
OCR_80112	chr2	39740587	39741237	4.06508	3.79783	136.546	1.54e-31	2.1e-29	CD4_8hr_vs_unstim	up
OCR_35857	chr12	27974955	27975698	2.81298	5.33726	136.528	1.55e-31	2.12e-29	CD4_8hr_vs_unstim	up
OCR_2995	chr1	52605493	52605822	4.03888	3.42474	136.334	1.71e-31	2.33e-29	CD4_8hr_vs_unstim	up
OCR_66205	chr17	42215481	42216008	4.01934	3.29364	136.222	1.81e-31	2.46e-29	CD4_8hr_vs_unstim	up
OCR_149076	chr6	139437100	139437744	3.09118	4.67651	136.181	1.85e-31	2.51e-29	CD4_8hr_vs_unstim	up
OCR_166429	chr8	82198761	82199378	4.18977	3.4406	136.156	1.87e-31	2.54e-29	CD4_8hr_vs_unstim	up
OCR_18635	chr10	26645987	26646664	5.08024	2.85696	136.013	2.01e-31	2.72e-29	CD4_8hr_vs_unstim	up
OCR_116100	chr4	2283009	2284273	-2.9258	4.61078	135.924	2.11e-31	2.84e-29	CD4_8hr_vs_unstim	down
OCR_39455	chr12	69220746	69221460	4.55631	2.90757	135.866	2.17e-31	2.92e-29	CD4_8hr_vs_unstim	up
OCR_35789	chr12	27332522	27333173	3.46958	4.34366	135.821	2.22e-31	2.98e-29	CD4_8hr_vs_unstim	up
OCR_8615	chr1	117604555	117604936	4.0886	3.76956	135.768	2.29e-31	3.07e-29	CD4_8hr_vs_unstim	up
OCR_71873	chr18	51708117	51709333	4.11582	4.0228	135.719	2.33e-31	3.13e-29	CD4_8hr_vs_unstim	up
OCR_138941	chr6	15184163	15185199	3.37743	4.33851	135.717	2.34e-31	3.13e-29	CD4_8hr_vs_unstim	up
OCR_38022	chr12	55375601	55375969	3.31642	4.43649	135.704	2.35e-31	3.14e-29	CD4_8hr_vs_unstim	up
OCR_42451	chr12	92909214	92910654	3.87798	3.58797	135.699	2.36e-31	3.14e-29	CD4_8hr_vs_unstim	up
OCR_166162	chr8	79517476	79518305	3.87537	3.30275	135.678	2.38e-31	3.17e-29	CD4_8hr_vs_unstim	up
OCR_19155	chr10	33409283	33410195	3.49306	4.5837	135.609	2.47e-31	3.28e-29	CD4_8hr_vs_unstim	up
OCR_37533	chr12	50019876	50020547	3.55114	3.76776	135.587	2.51e-31	3.33e-29	CD4_8hr_vs_unstim	up
OCR_170838	chr9	5446436	5446891	4.44627	3.06612	135.55	2.54e-31	3.36e-29	CD4_8hr_vs_unstim	up
OCR_118033	chr4	40303454	40304417	-2.79	4.91031	135.429	2.7e-31	3.57e-29	CD4_8hr_vs_unstim	down
OCR_111502	chr3	133314079	133315061	4.0538	3.54877	135.419	2.71e-31	3.58e-29	CD4_8hr_vs_unstim	up
OCR_96916	chr20	34248304	34248781	5.04934	3.11282	135.342	2.82e-31	3.72e-29	CD4_8hr_vs_unstim	up
OCR_96557	chr20	25218081	25218983	3.77837	3.99949	135.279	2.91e-31	3.83e-29	CD4_8hr_vs_unstim	up
OCR_53872	chr14	65802654	65803565	3.45064	4.29062	135.255	2.95e-31	3.87e-29	CD4_8hr_vs_unstim	up
OCR_1787	chr1	29388480	29389478	4.63574	3.14882	135.232	2.98e-31	3.91e-29	CD4_8hr_vs_unstim	up
OCR_73672	chr18	73120470	73121418	3.94507	3.46726	135.225	2.99e-31	3.92e-29	CD4_8hr_vs_unstim	up
OCR_2376	chr1	40916530	40917215	3.20953	4.48796	135.163	3.09e-31	4.03e-29	CD4_8hr_vs_unstim	up
OCR_131502	chr5	72683340	72684136	-3.32204	3.56748	135.123	3.15e-31	4.11e-29	CD4_8hr_vs_unstim	down
OCR_5601	chr1	85085138	85085437	4.35246	3.12867	135.007	3.34e-31	4.35e-29	CD4_8hr_vs_unstim	up
OCR_76382	chr19	39329158	39329667	4.52198	3.0887	134.996	3.36e-31	4.37e-29	CD4_8hr_vs_unstim	up
OCR_102568	chr22	42258617	42259357	3.65295	3.9241	134.992	3.37e-31	4.37e-29	CD4_8hr_vs_unstim	up
OCR_66167	chr17	41796916	41797368	5.65712	2.27495	134.956	3.43e-31	4.44e-29	CD4_8hr_vs_unstim	up
OCR_158187	chr7	106820638	106821523	3.62424	3.77146	134.805	3.7e-31	4.78e-29	CD4_8hr_vs_unstim	up
OCR_1170	chr1	22374792	22375235	4.44386	3.04094	134.701	3.9e-31	5.03e-29	CD4_8hr_vs_unstim	up
OCR_125332	chr4	159998463	159999200	3.56735	4.12956	134.688	3.92e-31	5.05e-29	CD4_8hr_vs_unstim	up
OCR_124898	chr4	151439316	151440117	4.81967	3.06491	134.684	3.93e-31	5.06e-29	CD4_8hr_vs_unstim	up
OCR_158086	chr7	105661917	105663563	-2.45475	5.70603	134.67	3.96e-31	5.08e-29	CD4_8hr_vs_unstim	down
OCR_117902	chr4	38655890	38656281	-3.42789	3.18019	134.524	4.26e-31	5.46e-29	CD4_8hr_vs_unstim	down
OCR_152806	chr7	17344588	17345090	3.52745	4.04858	134.49	4.33e-31	5.55e-29	CD4_8hr_vs_unstim	up
OCR_166347	chr8	81790713	81791118	5.21547	2.82487	134.466	4.39e-31	5.61e-29	CD4_8hr_vs_unstim	up
OCR_140735	chr6	39079006	39079493	3.59778	3.9993	134.429	4.47e-31	5.7e-29	CD4_8hr_vs_unstim	up
OCR_79215	chr2	25784039	25784394	5.92823	2.1429	134.369	4.6e-31	5.86e-29	CD4_8hr_vs_unstim	up
OCR_171885	chr9	21831848	21832617	4.04528	4.06739	134.327	4.7e-31	5.98e-29	CD4_8hr_vs_unstim	up
OCR_140616	chr6	37207398	37208540	3.64866	3.78494	134.319	4.72e-31	6e-29	CD4_8hr_vs_unstim	up
OCR_121675	chr4	103485431	103486239	3.68225	3.84222	134.241	4.91e-31	6.22e-29	CD4_8hr_vs_unstim	up
OCR_110320	chr3	112395610	112396225	2.92933	4.99658	134.176	5.08e-31	6.42e-29	CD4_8hr_vs_unstim	up
OCR_94533	chr2	227737852	227739079	3.84828	4.08431	134.168	5.09e-31	6.43e-29	CD4_8hr_vs_unstim	up
OCR_2996	chr1	52605896	52606181	4.44809	2.94143	133.941	5.71e-31	7.2e-29	CD4_8hr_vs_unstim	up
OCR_80298	chr2	42845949	42846625	4.62317	2.86288	133.92	5.77e-31	7.27e-29	CD4_8hr_vs_unstim	up
OCR_27308	chr11	35167492	35168087	3.30087	4.46153	133.909	5.81e-31	7.3e-29	CD4_8hr_vs_unstim	up
OCR_153533	chr7	28076521	28077264	4.42111	3.535	133.896	5.84e-31	7.33e-29	CD4_8hr_vs_unstim	up
OCR_95030	chr2	234335214	234335634	5.05361	2.56191	133.881	5.89e-31	7.38e-29	CD4_8hr_vs_unstim	up
OCR_99815	chr21	26955804	26956378	3.65168	3.75399	133.78	6.2e-31	7.75e-29	CD4_8hr_vs_unstim	up
OCR_23031	chr10	93734712	93735106	4.71225	2.98117	133.74	6.32e-31	7.89e-29	CD4_8hr_vs_unstim	up
OCR_8367	chr1	114411032	114411495	4.13761	3.38997	133.728	6.36e-31	7.93e-29	CD4_8hr_vs_unstim	up
OCR_36128	chr12	31885917	31886104	4.90001	2.98081	133.696	6.46e-31	8.04e-29	CD4_8hr_vs_unstim	up
OCR_51814	chr14	32548031	32548409	3.66693	4.03727	133.671	6.55e-31	8.13e-29	CD4_8hr_vs_unstim	up
OCR_157371	chr7	93651719	93652587	4.40187	3.88092	133.603	6.77e-31	8.4e-29	CD4_8hr_vs_unstim	up
OCR_1319	chr1	24676196	24676836	4.9164	2.57572	133.584	6.84e-31	8.47e-29	CD4_8hr_vs_unstim	up
OCR_150423	chr6	155831791	155832610	5.38536	2.72794	133.56	6.92e-31	8.56e-29	CD4_8hr_vs_unstim	up
OCR_50329	chr13	100027293	100028026	-3.22196	3.75528	133.519	7.07e-31	8.72e-29	CD4_8hr_vs_unstim	down
OCR_157267	chr7	92533469	92534470	2.64041	5.56354	133.491	7.16e-31	8.83e-29	CD4_8hr_vs_unstim	up
OCR_8581	chr1	117369517	117370650	3.32912	4.55642	133.401	7.5e-31	9.23e-29	CD4_8hr_vs_unstim	up
OCR_86368	chr2	144951858	144952595	4.38403	3.25416	133.323	7.8e-31	9.58e-29	CD4_8hr_vs_unstim	up
OCR_163004	chr8	12583864	12584636	5.62001	2.5381	133.215	8.23e-31	1.01e-28	CD4_8hr_vs_unstim	up
OCR_133687	chr5	102098348	102098928	3.54204	4.18572	133.202	8.29e-31	1.02e-28	CD4_8hr_vs_unstim	up
OCR_31338	chr11	102434886	102435241	4.69239	3.26643	133.172	8.41e-31	1.03e-28	CD4_8hr_vs_unstim	up
OCR_115249	chr3	186600580	186601031	4.55332	3.27396	133.172	8.41e-31	1.03e-28	CD4_8hr_vs_unstim	up
OCR_174686	chr9	99824591	99825246	5.02024	3.18784	133.169	8.43e-31	1.03e-28	CD4_8hr_vs_unstim	up
OCR_98526	chr21	16594936	16595453	4.18283	3.79312	133.155	8.49e-31	1.03e-28	CD4_8hr_vs_unstim	up
OCR_111875	chr3	141609118	141609892	4.08795	3.19166	133.13	8.61e-31	1.05e-28	CD4_8hr_vs_unstim	up
OCR_104037	chr3	18910733	18911356	4.61734	3.2425	133.097	8.74e-31	1.06e-28	CD4_8hr_vs_unstim	up
OCR_136242	chr5	142816499	142816791	5.42025	2.5363	133.082	8.81e-31	1.07e-28	CD4_8hr_vs_unstim	up
OCR_85620	chr2	136572477	136573287	4.31511	3.62037	133.077	8.83e-31	1.07e-28	CD4_8hr_vs_unstim	up
OCR_120270	chr4	81101868	81102163	3.78443	3.70933	133.051	8.94e-31	1.08e-28	CD4_8hr_vs_unstim	up
OCR_109076	chr3	101439647	101440301	3.05875	4.79498	133.014	9.11e-31	1.1e-28	CD4_8hr_vs_unstim	up
OCR_79837	chr2	36254824	36255492	4.43378	3.01366	132.993	9.21e-31	1.11e-28	CD4_8hr_vs_unstim	up
OCR_73163	chr18	67607158	67607585	3.90493	3.49775	132.982	9.26e-31	1.11e-28	CD4_8hr_vs_unstim	up
OCR_146493	chr6	112337228	112338124	4.17385	3.51526	132.888	9.71e-31	1.16e-28	CD4_8hr_vs_unstim	up
OCR_6309	chr1	93042561	93043810	3.89496	3.53856	132.773	1.03e-30	1.23e-28	CD4_8hr_vs_unstim	up
OCR_136120	chr5	141484044	141484477	-3.21706	3.67959	132.752	1.04e-30	1.24e-28	CD4_8hr_vs_unstim	down
OCR_140602	chr6	37141261	37141774	3.5412	3.78945	132.603	1.12e-30	1.34e-28	CD4_8hr_vs_unstim	up
OCR_164034	chr8	33418604	33419208	3.54424	4.01205	132.586	1.13e-30	1.35e-28	CD4_8hr_vs_unstim	up
OCR_91078	chr2	191708683	191709504	3.96579	3.76028	132.504	1.18e-30	1.4e-28	CD4_8hr_vs_unstim	up
OCR_65988	chr17	39704122	39704653	4.44158	2.8919	132.501	1.18e-30	1.4e-28	CD4_8hr_vs_unstim	up
OCR_158158	chr7	106413042	106413793	4.57895	3.11355	132.435	1.22e-30	1.45e-28	CD4_8hr_vs_unstim	up
OCR_10414	chr1	169553825	169554923	3.56772	3.88189	132.421	1.23e-30	1.45e-28	CD4_8hr_vs_unstim	up
OCR_21048	chr10	64933298	64934060	3.80194	3.968	132.408	1.24e-30	1.46e-28	CD4_8hr_vs_unstim	up
OCR_144252	chr6	86173753	86174999	3.6326	4.18522	132.405	1.24e-30	1.46e-28	CD4_8hr_vs_unstim	up
OCR_175620	chr9	117655606	117656402	4.23807	2.98038	132.4	1.24e-30	1.46e-28	CD4_8hr_vs_unstim	up
OCR_131292	chr5	66327599	66328516	4.00924	3.5644	132.336	1.28e-30	1.51e-28	CD4_8hr_vs_unstim	up
OCR_97639	chr20	49177935	49178625	4.60862	3.18318	132.298	1.31e-30	1.54e-28	CD4_8hr_vs_unstim	up
OCR_115962	chr3	197633363	197633860	4.31115	3.53988	132.242	1.34e-30	1.58e-28	CD4_8hr_vs_unstim	up
OCR_37709	chr12	52221509	52222571	3.47366	4.03273	132.238	1.35e-30	1.58e-28	CD4_8hr_vs_unstim	up
OCR_129597	chr5	35852337	35852904	3.37989	4.21092	132.15	1.41e-30	1.65e-28	CD4_8hr_vs_unstim	up
OCR_150407	chr6	155654317	155654919	3.57941	3.75536	131.936	1.57e-30	1.83e-28	CD4_8hr_vs_unstim	up
OCR_171907	chr9	22052302	22053343	3.48691	4.23164	131.914	1.58e-30	1.85e-28	CD4_8hr_vs_unstim	up
OCR_32654	chr11	122727176	122727917	3.44952	4.08512	131.947	1.59e-30	1.85e-28	CD4_8hr_vs_unstim	up
OCR_53662	chr14	62060919	62062085	3.57979	4.02206	131.907	1.59e-30	1.85e-28	CD4_8hr_vs_unstim	up
OCR_148971	chr6	138144877	138145941	-2.45056	5.62018	131.883	1.61e-30	1.87e-28	CD4_8hr_vs_unstim	down
OCR_78344	chr2	9734456	9735249	4.8291	3.14275	131.76	1.71e-30	1.99e-28	CD4_8hr_vs_unstim	up
OCR_51996	chr14	36786859	36787214	3.99441	3.51816	131.688	1.78e-30	2.06e-28	CD4_8hr_vs_unstim	up
OCR_75358	chr19	16479639	16480333	-2.89836	4.53222	131.681	1.78e-30	2.06e-28	CD4_8hr_vs_unstim	down
OCR_46101	chr13	45780281	45781242	4.93582	2.9829	131.409	2.04e-30	2.36e-28	CD4_8hr_vs_unstim	up
OCR_120097	chr4	77946914	77947556	4.75725	3.27399	131.369	2.1e-30	2.42e-28	CD4_8hr_vs_unstim	up
OCR_13431	chr1	199194953	199195791	2.81726	5.08184	131.251	2.21e-30	2.55e-28	CD4_8hr_vs_unstim	up
OCR_122427	chr4	114397781	114398365	4.38254	3.08417	131.177	2.3e-30	2.64e-28	CD4_8hr_vs_unstim	up
OCR_77548	chr19	51982622	51983331	5.94531	2.25457	131.141	2.34e-30	2.68e-28	CD4_8hr_vs_unstim	up
OCR_130966	chr5	60267965	60268539	4.52907	3.47815	131.089	2.4e-30	2.75e-28	CD4_8hr_vs_unstim	up
OCR_158118	chr7	105985902	105986739	3.73592	3.92343	131.067	2.47e-30	2.83e-28	CD4_8hr_vs_unstim	up
OCR_101401	chr22	23064409	23064838	4.11212	3.04114	130.879	2.68e-30	3.06e-28	CD4_8hr_vs_unstim	up
OCR_73173	chr18	67625720	67626079	3.38543	4.05486	130.816	2.76e-30	3.14e-28	CD4_8hr_vs_unstim	up
OCR_84307	chr2	110907247	110908069	5.59342	2.81984	130.816	2.75e-30	3.14e-28	CD4_8hr_vs_unstim	up
OCR_166380	chr8	81973113	81974138	3.30332	4.34458	130.796	2.78e-30	3.17e-28	CD4_8hr_vs_unstim	up
OCR_66529	chr17	46488789	46489250	4.78572	2.78198	130.767	2.82e-30	3.21e-28	CD4_8hr_vs_unstim	up
OCR_21811	chr10	74322994	74323563	4.566	3.35757	130.706	2.91e-30	3.3e-28	CD4_8hr_vs_unstim	up
OCR_56874	chr15	40785182	40786185	4.17184	3.27795	130.688	2.94e-30	3.33e-28	CD4_8hr_vs_unstim	up
OCR_3737	chr1	67751517	67752501	4.41209	3.26997	130.642	3.01e-30	3.4e-28	CD4_8hr_vs_unstim	up
OCR_157933	chr7	102965583	102966693	4.00045	3.54942	130.629	3.03e-30	3.42e-28	CD4_8hr_vs_unstim	up
OCR_74434	chr19	5718708	5718990	5.01954	2.50223	130.585	3.1e-30	3.49e-28	CD4_8hr_vs_unstim	up
OCR_146822	chr6	116332341	116333180	3.78315	4.00834	130.533	3.18e-30	3.58e-28	CD4_8hr_vs_unstim	up
OCR_140013	chr6	30787126	30787611	4.99649	2.54941	130.418	3.37e-30	3.78e-28	CD4_8hr_vs_unstim	up
OCR_130146	chr5	44875697	44876454	2.82475	5.21542	130.329	3.54e-30	3.97e-28	CD4_8hr_vs_unstim	up
OCR_149039	chr6	138975681	138976540	4.09584	3.6375	130.289	3.59e-30	4.03e-28	CD4_8hr_vs_unstim	up
OCR_55528	chr14	98643883	98644399	4.13433	3.40529	130.044	4.06e-30	4.55e-28	CD4_8hr_vs_unstim	up
OCR_46159	chr13	46723312	46724355	3.97855	3.4444	129.955	4.25e-30	4.74e-28	CD4_8hr_vs_unstim	up
OCR_134685	chr5	115411972	115412881	4.23199	3.87645	129.954	4.25e-30	4.74e-28	CD4_8hr_vs_unstim	up
OCR_149557	chr6	143460454	143460920	4.44733	3.05322	129.957	4.25e-30	4.74e-28	CD4_8hr_vs_unstim	up
OCR_136977	chr5	158667149	158668009	4.49343	3.19229	129.915	4.34e-30	4.82e-28	CD4_8hr_vs_unstim	up
OCR_42679	chr12	94766209	94766657	4.63434	3.03324	129.726	4.77e-30	5.3e-28	CD4_8hr_vs_unstim	up
OCR_15582	chr1	230240309	230241026	3.61142	3.89426	129.718	4.79e-30	5.31e-28	CD4_8hr_vs_unstim	up
OCR_38170	chr12	57051296	57052087	4.95388	2.87828	129.649	4.96e-30	5.49e-28	CD4_8hr_vs_unstim	up
OCR_133693	chr5	102113842	102114808	3.98027	3.67137	129.616	5.04e-30	5.58e-28	CD4_8hr_vs_unstim	up
OCR_104552	chr3	30139773	30140946	4.64991	2.75703	129.61	5.06e-30	5.59e-28	CD4_8hr_vs_unstim	up
OCR_67513	chr17	57839569	57840251	4.33439	3.03752	129.602	5.08e-30	5.6e-28	CD4_8hr_vs_unstim	up
OCR_91006	chr2	191269234	191269763	3.32631	4.23214	129.577	5.14e-30	5.66e-28	CD4_8hr_vs_unstim	up
OCR_26122	chr11	15074541	15075374	4.24286	3.40346	129.556	5.2e-30	5.71e-28	CD4_8hr_vs_unstim	up
OCR_75406	chr19	17190659	17191108	3.77004	3.59299	129.549	5.22e-30	5.73e-28	CD4_8hr_vs_unstim	up
OCR_35633	chr12	25429115	25429497	5.18665	2.6213	129.538	5.24e-30	5.75e-28	CD4_8hr_vs_unstim	up
OCR_64568	chr17	15884464	15885283	3.6706	3.76226	129.489	5.42e-30	5.93e-28	CD4_8hr_vs_unstim	up
OCR_135743	chr5	133846282	133847378	3.94944	3.22118	129.375	5.69e-30	6.23e-28	CD4_8hr_vs_unstim	up
OCR_46092	chr13	45629650	45630294	4.21588	3.39713	129.39	5.72e-30	6.25e-28	CD4_8hr_vs_unstim	up
OCR_56423	chr15	31653121	31654068	-2.46185	5.52956	129.349	5.77e-30	6.29e-28	CD4_8hr_vs_unstim	down
OCR_39255	chr12	67358030	67358880	-3.01098	4.21786	129.231	6.12e-30	6.66e-28	CD4_8hr_vs_unstim	down
OCR_124323	chr4	139156513	139157552	3.8463	3.48622	129.212	6.18e-30	6.72e-28	CD4_8hr_vs_unstim	up
OCR_39176	chr12	66597441	66598486	3.99372	3.53328	129.207	6.19e-30	6.73e-28	CD4_8hr_vs_unstim	up
OCR_102254	chr22	39337396	39338498	3.68661	3.48051	129.221	6.21e-30	6.73e-28	CD4_8hr_vs_unstim	up
OCR_49812	chr13	92021024	92021958	4.72349	3.56902	129.184	6.27e-30	6.79e-28	CD4_8hr_vs_unstim	up
OCR_151148	chr6	167533027	167533827	-3.41365	3.19454	129.094	6.56e-30	7.09e-28	CD4_8hr_vs_unstim	down
OCR_25808	chr11	10548209	10549359	3.84263	3.57121	128.993	6.9e-30	7.45e-28	CD4_8hr_vs_unstim	up
OCR_139260	chr6	20630910	20631741	4.27675	3.2213	128.944	7.07e-30	7.62e-28	CD4_8hr_vs_unstim	up
OCR_106401	chr3	67399454	67400492	4.42175	3.8392	128.933	7.11e-30	7.66e-28	CD4_8hr_vs_unstim	up
OCR_140466	chr6	35581192	35581886	4.44069	2.73331	128.908	7.2e-30	7.74e-28	CD4_8hr_vs_unstim	up
OCR_123129	chr4	123370768	123372561	3.50154	4.35095	128.817	7.54e-30	8.1e-28	CD4_8hr_vs_unstim	up
OCR_14862	chr1	219362355	219363104	4.41536	4.1242	128.784	7.66e-30	8.22e-28	CD4_8hr_vs_unstim	up
OCR_169109	chr8	117719807	117720236	5.30663	2.77188	128.777	7.69e-30	8.24e-28	CD4_8hr_vs_unstim	up
OCR_53802	chr14	64974171	64974393	3.96747	3.19534	128.708	7.96e-30	8.51e-28	CD4_8hr_vs_unstim	up
OCR_162088	chr7	150362153	150362782	4.24141	3.21087	128.646	8.22e-30	8.77e-28	CD4_8hr_vs_unstim	up
OCR_45419	chr13	31619476	31620444	3.01835	4.7498	128.613	8.35e-30	8.91e-28	CD4_8hr_vs_unstim	up
OCR_44531	chr12	125247288	125247872	4.87451	2.5162	128.595	8.43e-30	8.98e-28	CD4_8hr_vs_unstim	up
OCR_85776	chr2	139260716	139261557	2.91529	5.03794	128.551	8.62e-30	9.16e-28	CD4_8hr_vs_unstim	up
OCR_23182	chr10	96995619	96996641	4.46194	4.03462	128.538	8.68e-30	9.21e-28	CD4_8hr_vs_unstim	up
OCR_34120	chr12	12159905	12160343	3.84964	3.18046	128.444	9.1e-30	9.64e-28	CD4_8hr_vs_unstim	up
OCR_115023	chr3	182983620	182984119	4.96077	2.82157	128.439	9.12e-30	9.65e-28	CD4_8hr_vs_unstim	up
OCR_131962	chr5	80852504	80853144	4.18267	3.3574	128.427	9.18e-30	9.7e-28	CD4_8hr_vs_unstim	up
OCR_161368	chr7	141285510	141286391	4.06674	3.72097	128.344	9.57e-30	1.01e-27	CD4_8hr_vs_unstim	up
OCR_102416	chr22	40592635	40593076	4.96739	2.57654	128.33	9.64e-30	1.02e-27	CD4_8hr_vs_unstim	up
OCR_91912	chr2	197117203	197118223	3.73185	3.8004	128.288	9.84e-30	1.04e-27	CD4_8hr_vs_unstim	up
OCR_15061	chr1	222589190	222590074	3.74979	3.64621	128.224	1.02e-29	1.07e-27	CD4_8hr_vs_unstim	up
OCR_179944	chrX	123373198	123374371	3.24024	4.3327	128.197	1.03e-29	1.08e-27	CD4_8hr_vs_unstim	up
OCR_153349	chr7	24946900	24947568	3.1902	4.45978	128.159	1.05e-29	1.1e-27	CD4_8hr_vs_unstim	up
OCR_166164	chr8	79525030	79526026	3.61309	3.71397	128.111	1.08e-29	1.13e-27	CD4_8hr_vs_unstim	up
OCR_148297	chr6	130355117	130356151	3.22399	4.39125	128.081	1.09e-29	1.14e-27	CD4_8hr_vs_unstim	up
OCR_173097	chr9	35924243	35924766	6.27806	2.37466	128.083	1.09e-29	1.14e-27	CD4_8hr_vs_unstim	up
OCR_86262	chr2	143908854	143909337	4.10196	3.31598	128.074	1.1e-29	1.14e-27	CD4_8hr_vs_unstim	up
OCR_149628	chr6	144451795	144453075	3.92503	3.71842	128.068	1.1e-29	1.15e-27	CD4_8hr_vs_unstim	up
OCR_146293	chr6	110008429	110008731	4.14667	3.1904	127.982	1.15e-29	1.19e-27	CD4_8hr_vs_unstim	up
OCR_108312	chr3	93729992	93730769	3.59059	4.54463	127.846	1.23e-29	1.28e-27	CD4_8hr_vs_unstim	up
OCR_55219	chr14	92446343	92447127	4.39417	3.06538	127.779	1.27e-29	1.32e-27	CD4_8hr_vs_unstim	up
OCR_138897	chr6	14542129	14543612	3.48193	3.90009	127.739	1.3e-29	1.34e-27	CD4_8hr_vs_unstim	up
OCR_137580	chr5	171701858	171702829	3.78859	3.65588	127.712	1.32e-29	1.36e-27	CD4_8hr_vs_unstim	up
OCR_71267	chr18	36993803	36994848	4.06526	4.32192	127.696	1.33e-29	1.37e-27	CD4_8hr_vs_unstim	up
OCR_13280	chr1	198570825	198572189	3.25051	4.43461	127.693	1.33e-29	1.37e-27	CD4_8hr_vs_unstim	up
OCR_159337	chr7	116650118	116651083	3.29162	4.38065	127.658	1.35e-29	1.39e-27	CD4_8hr_vs_unstim	up
OCR_152286	chr7	12758994	12759838	4.0058	3.17765	127.579	1.41e-29	1.45e-27	CD4_8hr_vs_unstim	up
OCR_67913	chr17	63354956	63355863	5.00467	2.8201	127.565	1.42e-29	1.45e-27	CD4_8hr_vs_unstim	up
OCR_67689	chr17	60729606	60731481	2.34544	6.04368	127.497	1.47e-29	1.5e-27	CD4_8hr_vs_unstim	up
OCR_132426	chr5	86596593	86596951	4.09895	3.09432	127.377	1.56e-29	1.6e-27	CD4_8hr_vs_unstim	up
OCR_77540	chr19	51944104	51945639	2.4712	5.64418	127.264	1.65e-29	1.69e-27	CD4_8hr_vs_unstim	up
OCR_71801	chr18	48697683	48698592	3.91772	4.25136	127.207	1.7e-29	1.73e-27	CD4_8hr_vs_unstim	up
OCR_86307	chr2	144155240	144156138	3.86344	3.77534	127.15	1.75e-29	1.78e-27	CD4_8hr_vs_unstim	up
OCR_19161	chr10	33432035	33432751	3.2439	4.33175	127.001	1.88e-29	1.92e-27	CD4_8hr_vs_unstim	up
OCR_46422	chr13	50818883	50819744	3.73962	3.76627	126.948	1.94e-29	1.97e-27	CD4_8hr_vs_unstim	up
OCR_25917	chr11	12195735	12196775	3.94331	3.66427	126.876	2e-29	2.04e-27	CD4_8hr_vs_unstim	up
OCR_86728	chr2	148386291	148387173	4.29301	3.31755	126.807	2.08e-29	2.11e-27	CD4_8hr_vs_unstim	up
OCR_176952	chrX	9253245	9254154	3.62967	3.77712	126.753	2.13e-29	2.16e-27	CD4_8hr_vs_unstim	up
OCR_116889	chr4	23374679	23375418	3.6072	3.83062	126.73	2.16e-29	2.18e-27	CD4_8hr_vs_unstim	up
OCR_117936	chr4	38950899	38951706	-3.37694	3.06947	126.614	2.29e-29	2.31e-27	CD4_8hr_vs_unstim	down
OCR_15443	chr1	228122323	228123181	3.9887	3.26287	126.605	2.3e-29	2.32e-27	CD4_8hr_vs_unstim	up
OCR_175286	chr9	111647686	111648685	4.60291	3.67819	126.602	2.3e-29	2.32e-27	CD4_8hr_vs_unstim	up
OCR_67527	chr17	57923642	57923932	3.80221	3.34199	126.579	2.33e-29	2.34e-27	CD4_8hr_vs_unstim	up
OCR_116403	chr4	10107532	10108629	2.77396	5.08808	126.381	2.57e-29	2.59e-27	CD4_8hr_vs_unstim	up
OCR_92335	chr2	201270320	201271236	3.64436	3.67821	126.273	2.72e-29	2.73e-27	CD4_8hr_vs_unstim	up
OCR_108839	chr3	98276084	98276744	3.70979	4.14095	126.259	2.73e-29	2.74e-27	CD4_8hr_vs_unstim	up
OCR_30080	chr11	85925676	85926375	4.08535	3.62791	126.233	2.77e-29	2.78e-27	CD4_8hr_vs_unstim	up
OCR_132484	chr5	87546654	87547441	4.2234	3.46227	126.22	2.79e-29	2.79e-27	CD4_8hr_vs_unstim	up
OCR_89215	chr2	173827379	173828400	3.5402	3.84674	126.118	2.94e-29	2.93e-27	CD4_8hr_vs_unstim	up
OCR_62562	chr16	69597745	69598672	2.83159	4.98087	126.109	2.95e-29	2.94e-27	CD4_8hr_vs_unstim	up
OCR_68752	chr17	73245638	73245943	5.07384	2.52109	126.068	3.01e-29	3e-27	CD4_8hr_vs_unstim	up
OCR_178667	chrX	67723628	67724815	3.68512	3.90667	125.928	3.23e-29	3.22e-27	CD4_8hr_vs_unstim	up
OCR_78275	chr2	8436453	8437047	4.28837	2.8646	125.921	3.24e-29	3.22e-27	CD4_8hr_vs_unstim	up
OCR_51807	chr14	32406877	32407727	3.30386	4.37195	125.735	3.56e-29	3.54e-27	CD4_8hr_vs_unstim	up
OCR_174586	chr9	97633149	97633959	-3.17787	3.50675	125.677	3.67e-29	3.64e-27	CD4_8hr_vs_unstim	down
OCR_97572	chr20	48315629	48316548	4.59117	2.89563	125.563	3.88e-29	3.84e-27	CD4_8hr_vs_unstim	up
OCR_32101	chr11	111803143	111803728	4.6793	3.15169	125.522	3.98e-29	3.93e-27	CD4_8hr_vs_unstim	up
OCR_52967	chr14	50361448	50361838	3.98516	3.30207	125.515	3.98e-29	3.93e-27	CD4_8hr_vs_unstim	up
OCR_17768	chr10	14548899	14549583	-3.296	3.16995	125.488	4.03e-29	3.98e-27	CD4_8hr_vs_unstim	down
OCR_58089	chr15	64161834	64163110	3.75844	3.48776	125.452	4.11e-29	4.05e-27	CD4_8hr_vs_unstim	up
OCR_9796	chr1	160430506	160431228	3.64554	3.61891	125.411	4.19e-29	4.12e-27	CD4_8hr_vs_unstim	up
OCR_144329	chr6	87891705	87892532	3.93569	3.69441	125.39	4.24e-29	4.16e-27	CD4_8hr_vs_unstim	up
OCR_124576	chr4	143503089	143504141	4.27562	3.18439	125.315	4.4e-29	4.32e-27	CD4_8hr_vs_unstim	up
OCR_71172	chr18	36143223	36144133	4.45845	3.19518	125.298	4.44e-29	4.35e-27	CD4_8hr_vs_unstim	up
OCR_16894	chr10	3113701	3113938	4.9237	2.56724	125.142	4.8e-29	4.69e-27	CD4_8hr_vs_unstim	up
OCR_55475	chr14	98179125	98180084	4.67225	2.52706	125.142	4.8e-29	4.69e-27	CD4_8hr_vs_unstim	up
OCR_10361	chr1	168960662	168961707	3.28154	4.25107	125.127	4.84e-29	4.72e-27	CD4_8hr_vs_unstim	up
OCR_174898	chr9	104332086	104332978	-2.54211	5.20148	125.068	4.98e-29	4.86e-27	CD4_8hr_vs_unstim	down
OCR_112566	chr3	150456901	150458184	3.07636	4.64571	124.953	5.28e-29	5.14e-27	CD4_8hr_vs_unstim	up
OCR_42605	chr12	94174690	94175209	3.3988	3.91776	124.909	5.4e-29	5.25e-27	CD4_8hr_vs_unstim	up
OCR_15139	chr1	223575091	223576159	3.97819	3.22003	124.902	5.42e-29	5.26e-27	CD4_8hr_vs_unstim	up
OCR_154544	chr7	48124526	48124929	3.44481	4.16097	124.885	5.46e-29	5.3e-27	CD4_8hr_vs_unstim	up
OCR_6447	chr1	95006881	95008384	2.91446	4.94324	124.793	5.72e-29	5.54e-27	CD4_8hr_vs_unstim	up
OCR_174136	chr9	86910856	86911791	3.17606	4.57253	124.785	5.75e-29	5.56e-27	CD4_8hr_vs_unstim	up
OCR_695	chr1	12217407	12217744	4.24108	3.04118	124.748	5.85e-29	5.66e-27	CD4_8hr_vs_unstim	up
OCR_111949	chr3	142884423	142884875	3.59953	3.75881	124.722	5.93e-29	5.72e-27	CD4_8hr_vs_unstim	up
OCR_27344	chr11	35358652	35359472	4.32821	3.21445	124.655	6.13e-29	5.91e-27	CD4_8hr_vs_unstim	up
OCR_121155	chr4	95428483	95429484	4.06191	3.35936	124.584	6.36e-29	6.12e-27	CD4_8hr_vs_unstim	up
OCR_61872	chr16	56766757	56767089	4.64962	2.94563	124.57	6.4e-29	6.16e-27	CD4_8hr_vs_unstim	up
OCR_5683	chr1	85763538	85764468	2.8454	4.92736	124.565	6.42e-29	6.16e-27	CD4_8hr_vs_unstim	up
OCR_25374	chr11	3035075	3036153	-2.81158	4.56214	124.565	6.47e-29	6.2e-27	CD4_8hr_vs_unstim	down
OCR_109129	chr3	101743144	101743849	4.639	3.06825	124.441	6.83e-29	6.55e-27	CD4_8hr_vs_unstim	up
OCR_138763	chr6	12229377	12230055	4.79056	2.67342	124.427	6.9e-29	6.61e-27	CD4_8hr_vs_unstim	up
OCR_83701	chr2	101269955	101270713	-2.98567	4.04959	124.412	6.93e-29	6.63e-27	CD4_8hr_vs_unstim	down
OCR_106783	chr3	72387652	72388425	3.66647	3.51774	124.336	7.2e-29	6.87e-27	CD4_8hr_vs_unstim	up
OCR_144551	chr6	90854127	90854553	4.03908	3.46007	124.329	7.23e-29	6.89e-27	CD4_8hr_vs_unstim	up
OCR_11324	chr1	185213385	185213857	4.10915	3.00091	124.308	7.3e-29	6.95e-27	CD4_8hr_vs_unstim	up
OCR_99785	chr21	26831708	26832114	3.83277	3.53572	124.309	7.3e-29	6.95e-27	CD4_8hr_vs_unstim	up
OCR_159119	chr7	114870767	114871566	3.17304	4.54067	124.288	7.38e-29	7.01e-27	CD4_8hr_vs_unstim	up
OCR_35829	chr12	27771883	27772802	4.08289	3.00603	124.272	7.44e-29	7.06e-27	CD4_8hr_vs_unstim	up
OCR_177517	chrX	21944769	21945492	4.62729	2.94052	124.255	7.5e-29	7.11e-27	CD4_8hr_vs_unstim	up
OCR_167483	chr8	94947486	94948524	3.26604	4.26549	124.245	7.54e-29	7.14e-27	CD4_8hr_vs_unstim	up
OCR_153966	chr7	37071462	37072078	3.61405	3.81626	124.24	7.56e-29	7.14e-27	CD4_8hr_vs_unstim	up
OCR_161943	chr7	148623550	148624550	4.73927	3.24775	124.231	7.61e-29	7.18e-27	CD4_8hr_vs_unstim	up
OCR_27116	chr11	32109629	32109899	4.17096	3.20515	124.213	7.67e-29	7.23e-27	CD4_8hr_vs_unstim	up
OCR_37771	chr12	52979697	52980372	-3.00598	4.07932	124.154	7.9e-29	7.43e-27	CD4_8hr_vs_unstim	down
OCR_169002	chr8	116439652	116440346	2.6366	5.34781	124.077	8.23e-29	7.74e-27	CD4_8hr_vs_unstim	up
OCR_169279	chr8	121699520	121700542	3.6099	3.90721	124.067	8.25e-29	7.75e-27	CD4_8hr_vs_unstim	up
OCR_63931	chr17	4872628	4872864	4.89925	2.71942	123.975	8.64e-29	8.11e-27	CD4_8hr_vs_unstim	up
OCR_103872	chr3	17067099	17067562	3.43889	3.89272	123.954	8.73e-29	8.18e-27	CD4_8hr_vs_unstim	up
OCR_153915	chr7	36640469	36641463	3.55716	3.85423	123.868	9.12e-29	8.53e-27	CD4_8hr_vs_unstim	up
OCR_122209	chr4	110738005	110738380	4.57687	2.81948	123.846	9.22e-29	8.62e-27	CD4_8hr_vs_unstim	up
OCR_75286	chr19	15643516	15644551	3.5922	3.56642	123.813	9.37e-29	8.75e-27	CD4_8hr_vs_unstim	up
OCR_173509	chr9	75172412	75173009	3.9005	3.11248	123.701	9.92e-29	9.25e-27	CD4_8hr_vs_unstim	up
OCR_171867	chr9	21688763	21689066	4.49384	2.74607	123.671	1.01e-28	9.38e-27	CD4_8hr_vs_unstim	up
OCR_26016	chr11	13961290	13962685	-3.02623	3.89925	123.59	1.05e-28	9.76e-27	CD4_8hr_vs_unstim	down
OCR_21668	chr10	72416073	72416821	4.72422	2.77565	123.558	1.07e-28	9.89e-27	CD4_8hr_vs_unstim	up
OCR_76578	chr19	41332577	41333406	-3.38054	2.90301	123.559	1.07e-28	9.89e-27	CD4_8hr_vs_unstim	down
OCR_76827	chr19	44269045	44270255	3.00881	4.57447	123.435	1.13e-28	1.05e-26	CD4_8hr_vs_unstim	up
OCR_169663	chr8	128399171	128399775	-3.18625	3.32011	123.361	1.18e-28	1.09e-26	CD4_8hr_vs_unstim	down
OCR_48341	chr13	75939786	75940549	3.4459	4.09798	123.337	1.19e-28	1.1e-26	CD4_8hr_vs_unstim	up
OCR_91791	chr2	196409160	196409705	3.65034	3.5439	123.258	1.24e-28	1.14e-26	CD4_8hr_vs_unstim	up
OCR_148439	chr6	131853473	131854302	3.17214	4.26796	123.235	1.25e-28	1.16e-26	CD4_8hr_vs_unstim	up
OCR_140697	chr6	38025572	38026452	3.21447	4.19857	123.231	1.26e-28	1.16e-26	CD4_8hr_vs_unstim	up
OCR_1685	chr1	27963573	27963886	3.8957	3.1731	123.186	1.29e-28	1.18e-26	CD4_8hr_vs_unstim	up
OCR_176028	chr9	130189008	130189431	5.45674	2.51339	123.091	1.35e-28	1.24e-26	CD4_8hr_vs_unstim	up
OCR_167850	chr8	101821555	101822473	-2.38249	5.61652	123.059	1.37e-28	1.26e-26	CD4_8hr_vs_unstim	down
OCR_63258	chr16	85922109	85923033	3.49766	3.864	123.027	1.39e-28	1.28e-26	CD4_8hr_vs_unstim	up
OCR_121414	chr4	99522556	99523260	3.6967	3.94731	123.025	1.39e-28	1.28e-26	CD4_8hr_vs_unstim	up
OCR_54159	chr14	70110108	70110771	3.47281	3.76325	122.994	1.42e-28	1.3e-26	CD4_8hr_vs_unstim	up
OCR_17363	chr10	8284322	8284882	4.17932	2.9722	122.965	1.44e-28	1.31e-26	CD4_8hr_vs_unstim	up
OCR_99806	chr21	26938233	26938496	4.29645	3.12171	122.964	1.44e-28	1.31e-26	CD4_8hr_vs_unstim	up
OCR_71547	chr18	43454333	43455234	2.84383	4.8816	122.925	1.47e-28	1.34e-26	CD4_8hr_vs_unstim	up
OCR_100022	chr21	30360583	30360824	4.53669	2.6841	122.917	1.47e-28	1.34e-26	CD4_8hr_vs_unstim	up
OCR_106812	chr3	72533715	72534315	4.58566	2.98364	122.852	1.52e-28	1.38e-26	CD4_8hr_vs_unstim	up
OCR_18505	chr10	24498841	24499429	3.90947	4.04332	122.803	1.56e-28	1.42e-26	CD4_8hr_vs_unstim	up
OCR_59180	chr15	85535682	85536298	5.04826	2.58022	122.766	1.59e-28	1.44e-26	CD4_8hr_vs_unstim	up
OCR_178388	chrX	53215539	53215969	5.47278	2.23992	122.757	1.6e-28	1.45e-26	CD4_8hr_vs_unstim	up
OCR_6252	chr1	92343204	92343855	3.64287	3.56014	122.66	1.68e-28	1.52e-26	CD4_8hr_vs_unstim	up
OCR_114792	chr3	177712619	177713866	3.21699	4.18472	122.64	1.69e-28	1.53e-26	CD4_8hr_vs_unstim	up
OCR_10835	chr1	175996930	175997602	4.43454	3.35234	122.62	1.71e-28	1.54e-26	CD4_8hr_vs_unstim	up
OCR_141667	chr6	53171661	53172145	3.89826	3.52165	122.578	1.75e-28	1.57e-26	CD4_8hr_vs_unstim	up
OCR_11177	chr1	182683049	182683433	4.42299	2.9108	122.565	1.76e-28	1.58e-26	CD4_8hr_vs_unstim	up
OCR_134416	chr5	110590304	110591392	2.82629	4.90984	122.556	1.77e-28	1.59e-26	CD4_8hr_vs_unstim	up
OCR_24146	chr10	112533721	112534649	3.8571	3.77392	122.543	1.78e-28	1.6e-26	CD4_8hr_vs_unstim	up
OCR_115233	chr3	186470723	186471419	5.55636	2.36129	122.518	1.8e-28	1.62e-26	CD4_8hr_vs_unstim	up
OCR_147914	chr6	127741519	127742309	2.40177	5.8034	122.508	1.81e-28	1.63e-26	CD4_8hr_vs_unstim	up
OCR_98132	chr20	61076716	61077664	3.80566	3.53248	122.528	1.85e-28	1.66e-26	CD4_8hr_vs_unstim	up
OCR_1964	chr1	33088674	33089935	4.01307	3.24253	122.387	1.92e-28	1.72e-26	CD4_8hr_vs_unstim	up
OCR_148215	chr6	129770096	129770632	3.77598	3.68446	122.325	1.98e-28	1.77e-26	CD4_8hr_vs_unstim	up
OCR_103871	chr3	17064189	17065145	3.14297	4.37528	122.314	2e-28	1.78e-26	CD4_8hr_vs_unstim	up
OCR_167825	chr8	101514361	101515449	2.90149	4.81317	122.28	2.03e-28	1.81e-26	CD4_8hr_vs_unstim	up
OCR_174518	chr9	95908574	95909467	3.84605	3.04655	122.281	2.03e-28	1.81e-26	CD4_8hr_vs_unstim	up
OCR_123058	chr4	122148415	122149255	2.73156	5.10317	122.255	2.05e-28	1.83e-26	CD4_8hr_vs_unstim	up
OCR_150503	chr6	157178460	157179080	3.88269	3.57704	122.253	2.06e-28	1.83e-26	CD4_8hr_vs_unstim	up
OCR_50212	chr13	99542386	99542951	4.0222	2.99651	122.218	2.09e-28	1.86e-26	CD4_8hr_vs_unstim	up
OCR_66137	chr17	41369516	41370196	3.92494	3.05796	122.205	2.11e-28	1.87e-26	CD4_8hr_vs_unstim	up
OCR_40220	chr12	76132010	76132710	3.68608	3.77452	122.202	2.11e-28	1.87e-26	CD4_8hr_vs_unstim	up
OCR_57930	chr15	60987788	60988486	4.10852	3.15411	122.142	2.18e-28	1.93e-26	CD4_8hr_vs_unstim	up
OCR_72007	chr18	55505053	55505640	4.18233	3.55672	122.08	2.24e-28	1.98e-26	CD4_8hr_vs_unstim	up
OCR_31295	chr11	102231305	102232839	-2.50869	5.19411	122.038	2.29e-28	2.02e-26	CD4_8hr_vs_unstim	down
OCR_15333	chr1	226815372	226816005	3.51942	3.56748	121.886	2.48e-28	2.18e-26	CD4_8hr_vs_unstim	up
OCR_136938	chr5	158246996	158247917	3.61214	3.68581	121.835	2.54e-28	2.23e-26	CD4_8hr_vs_unstim	up
OCR_163964	chr8	29991140	29991876	-3.03131	3.77415	121.806	2.58e-28	2.26e-26	CD4_8hr_vs_unstim	down
OCR_131654	chr5	75663551	75664433	3.63325	3.70406	121.786	2.6e-28	2.28e-26	CD4_8hr_vs_unstim	up
OCR_148732	chr6	135411346	135411726	3.78465	3.31779	121.688	2.73e-28	2.4e-26	CD4_8hr_vs_unstim	up
OCR_114724	chr3	177069341	177070240	3.47619	3.94891	121.629	2.82e-28	2.47e-26	CD4_8hr_vs_unstim	up
OCR_15169	chr1	224019368	224020640	2.69731	5.10051	121.616	2.84e-28	2.48e-26	CD4_8hr_vs_unstim	up
OCR_37672	chr12	51687470	51688038	5.01811	2.3137	121.607	2.85e-28	2.49e-26	CD4_8hr_vs_unstim	up
OCR_67512	chr17	57831790	57832507	3.71007	3.39607	121.605	2.85e-28	2.49e-26	CD4_8hr_vs_unstim	up
OCR_135906	chr5	138581587	138582483	3.93267	3.0798	121.482	3.03e-28	2.64e-26	CD4_8hr_vs_unstim	up
OCR_58665	chr15	74675910	74677108	3.42693	3.90679	121.438	3.1e-28	2.7e-26	CD4_8hr_vs_unstim	up
OCR_67386	chr17	55956876	55957928	3.5117	3.65053	121.41	3.15e-28	2.73e-26	CD4_8hr_vs_unstim	up
OCR_135611	chr5	131808663	131809121	-3.04598	3.71218	121.413	3.14e-28	2.73e-26	CD4_8hr_vs_unstim	down
OCR_64731	chr17	17941411	17941744	4.74002	2.61562	121.375	3.2e-28	2.78e-26	CD4_8hr_vs_unstim	up
OCR_153267	chr7	23444157	23445266	4.17707	3.10698	121.37	3.21e-28	2.78e-26	CD4_8hr_vs_unstim	up
OCR_151721	chr7	7758768	7759596	2.85094	4.81096	121.322	3.29e-28	2.85e-26	CD4_8hr_vs_unstim	up
OCR_27200	chr11	33753397	33753714	4.74022	2.8963	121.294	3.34e-28	2.89e-26	CD4_8hr_vs_unstim	up
OCR_98595	chr21	17167781	17168358	3.59088	3.5762	121.278	3.36e-28	2.91e-26	CD4_8hr_vs_unstim	up
OCR_133020	chr5	94983564	94983864	4.11236	2.98173	121.268	3.38e-28	2.92e-26	CD4_8hr_vs_unstim	up
OCR_55556	chr14	99014389	99015351	3.87941	3.18128	121.256	3.4e-28	2.93e-26	CD4_8hr_vs_unstim	up
OCR_124354	chr4	139935412	139935714	4.86782	2.73259	121.215	3.47e-28	2.99e-26	CD4_8hr_vs_unstim	up
OCR_3605	chr1	66594189	66594880	4.26683	3.34102	121.19	3.52e-28	3.02e-26	CD4_8hr_vs_unstim	up
OCR_31889	chr11	108111969	108112767	3.20307	4.25704	121.185	3.52e-28	3.03e-26	CD4_8hr_vs_unstim	up
OCR_28114	chr11	47819035	47819670	5.22726	2.86983	121.152	3.58e-28	3.07e-26	CD4_8hr_vs_unstim	up
OCR_146382	chr6	111808912	111809222	3.8888	3.40615	121.156	3.59e-28	3.08e-26	CD4_8hr_vs_unstim	up
OCR_166428	chr8	82195969	82196196	4.41626	2.74956	121.121	3.64e-28	3.12e-26	CD4_8hr_vs_unstim	up
OCR_115966	chr3	197798510	197799306	3.17632	4.3136	121.115	3.65e-28	3.12e-26	CD4_8hr_vs_unstim	up
OCR_167226	chr8	90738966	90739626	4.70473	3.45429	120.99	3.89e-28	3.32e-26	CD4_8hr_vs_unstim	up
OCR_170282	chr8	142036496	142037508	3.90638	3.42045	120.963	3.94e-28	3.36e-26	CD4_8hr_vs_unstim	up
OCR_139427	chr6	24743453	24744161	3.98868	3.28034	120.9	4.07e-28	3.47e-26	CD4_8hr_vs_unstim	up
OCR_110231	chr3	111682288	111682637	5.01435	2.22111	120.859	4.15e-28	3.54e-26	CD4_8hr_vs_unstim	up
OCR_27237	chr11	34236425	34237238	4.42718	3.12809	120.815	4.25e-28	3.61e-26	CD4_8hr_vs_unstim	up
OCR_123150	chr4	123499394	123500322	-2.1682	6.17808	120.805	4.27e-28	3.63e-26	CD4_8hr_vs_unstim	down
OCR_81056	chr2	53978545	53979451	4.01853	3.68554	120.797	4.28e-28	3.64e-26	CD4_8hr_vs_unstim	up
OCR_15218	chr1	224685312	224686639	3.1095	4.62502	120.791	4.3e-28	3.64e-26	CD4_8hr_vs_unstim	up
OCR_177630	chrX	24700946	24701931	4.70557	3.29244	120.72	4.45e-28	3.77e-26	CD4_8hr_vs_unstim	up
OCR_60971	chr16	23973249	23973734	5.00176	2.71689	120.649	4.62e-28	3.91e-26	CD4_8hr_vs_unstim	up
OCR_64977	chr17	25800566	25801142	2.99147	4.57071	120.608	4.71e-28	3.98e-26	CD4_8hr_vs_unstim	up
OCR_33881	chr12	9797637	9797912	4.70527	2.40247	120.565	4.82e-28	4.06e-26	CD4_8hr_vs_unstim	up
OCR_97577	chr20	48392478	48393413	4.41166	2.78883	120.538	4.88e-28	4.12e-26	CD4_8hr_vs_unstim	up
OCR_68195	chr17	66245104	66245436	4.13416	3.06383	120.535	4.89e-28	4.12e-26	CD4_8hr_vs_unstim	up
OCR_21720	chr10	73520754	73521392	3.63263	3.29547	120.467	5.06e-28	4.26e-26	CD4_8hr_vs_unstim	up
OCR_104038	chr3	18911607	18912017	4.36157	3.12613	120.443	5.12e-28	4.3e-26	CD4_8hr_vs_unstim	up
OCR_175715	chr9	123607606	123608074	5.42281	2.54443	120.377	5.29e-28	4.44e-26	CD4_8hr_vs_unstim	up
OCR_59319	chr15	89166338	89166875	3.92508	3.22668	120.375	5.3e-28	4.44e-26	CD4_8hr_vs_unstim	up
OCR_109894	chr3	107836815	107837797	4.10085	2.97303	120.207	5.77e-28	4.83e-26	CD4_8hr_vs_unstim	up
OCR_21009	chr10	64520807	64521490	3.61852	3.24296	120.151	5.93e-28	4.96e-26	CD4_8hr_vs_unstim	up
OCR_61223	chr16	29040252	29041263	3.25156	4.00028	119.977	6.48e-28	5.41e-26	CD4_8hr_vs_unstim	up
OCR_13858	chr1	205206776	205207941	3.75462	3.49385	119.951	6.57e-28	5.49e-26	CD4_8hr_vs_unstim	up
OCR_76465	chr19	40169714	40170846	3.43797	3.6044	119.936	6.61e-28	5.51e-26	CD4_8hr_vs_unstim	up
OCR_165059	chr8	61512035	61513034	4.05179	3.22886	119.931	6.63e-28	5.52e-26	CD4_8hr_vs_unstim	up
OCR_104615	chr3	30681456	30681982	3.2824	4.13388	119.918	6.67e-28	5.55e-26	CD4_8hr_vs_unstim	up
OCR_146320	chr6	110858225	110858965	3.91417	3.18575	119.859	6.88e-28	5.71e-26	CD4_8hr_vs_unstim	up
OCR_37077	chr12	45626770	45627261	4.39558	3.02857	119.844	6.93e-28	5.75e-26	CD4_8hr_vs_unstim	up
OCR_2262	chr1	39658960	39659287	4.3538	2.64221	119.797	7.09e-28	5.87e-26	CD4_8hr_vs_unstim	up
OCR_20618	chr10	60042138	60042958	2.34667	5.95041	119.877	7.08e-28	5.87e-26	CD4_8hr_vs_unstim	up
OCR_31719	chr11	105962203	105962852	3.62249	4.25381	119.795	7.1e-28	5.87e-26	CD4_8hr_vs_unstim	up
OCR_97966	chr20	56273095	56273775	3.73164	3.49658	119.768	7.19e-28	5.95e-26	CD4_8hr_vs_unstim	up
OCR_76587	chr19	41501147	41501684	6.16993	1.91635	119.75	7.26e-28	6e-26	CD4_8hr_vs_unstim	up
OCR_180337	chrX	135668453	135668974	-3.23747	2.99094	119.722	7.37e-28	6.08e-26	CD4_8hr_vs_unstim	down
OCR_66459	chr17	45795447	45795961	3.57386	3.45236	119.712	7.4e-28	6.1e-26	CD4_8hr_vs_unstim	up
OCR_15657	chr1	231600777	231601208	4.96943	2.71719	119.592	7.86e-28	6.47e-26	CD4_8hr_vs_unstim	up
OCR_147182	chr6	120177281	120177706	3.10318	4.51256	119.579	7.91e-28	6.51e-26	CD4_8hr_vs_unstim	up
OCR_131288	chr5	66307819	66308516	4.14381	3.07997	119.562	7.98e-28	6.56e-26	CD4_8hr_vs_unstim	up
OCR_83132	chr2	85230932	85231807	3.91184	3.25668	119.5	8.24e-28	6.76e-26	CD4_8hr_vs_unstim	up
OCR_55135	chr14	91689179	91689755	3.8429	3.12573	119.452	8.45e-28	6.93e-26	CD4_8hr_vs_unstim	up
OCR_97687	chr20	50096785	50097684	3.29634	4.35897	119.416	8.59e-28	7.03e-26	CD4_8hr_vs_unstim	up
OCR_141167	chr6	45677544	45678630	3.68667	3.82831	119.376	8.77e-28	7.17e-26	CD4_8hr_vs_unstim	up
OCR_48195	chr13	74296114	74296769	3.16026	4.15095	119.365	8.82e-28	7.2e-26	CD4_8hr_vs_unstim	up
OCR_101510	chr22	24680728	24681734	3.08185	4.31429	119.361	8.84e-28	7.21e-26	CD4_8hr_vs_unstim	up
OCR_133314	chr5	98373320	98373991	-3.05197	3.57088	119.339	8.93e-28	7.28e-26	CD4_8hr_vs_unstim	down
OCR_88894	chr2	169352078	169352676	4.12963	3.10688	119.32	9.02e-28	7.34e-26	CD4_8hr_vs_unstim	up
OCR_109990	chr3	108620919	108621631	3.33986	3.94168	119.318	9.03e-28	7.34e-26	CD4_8hr_vs_unstim	up
OCR_76711	chr19	42624875	42625209	5.43154	2.23546	119.229	9.44e-28	7.67e-26	CD4_8hr_vs_unstim	up
OCR_180309	chrX	135147118	135147900	-3.21294	3.07619	119.211	9.53e-28	7.73e-26	CD4_8hr_vs_unstim	down
OCR_136889	chr5	157156899	157157287	4.13727	3.27162	119.195	9.6e-28	7.79e-26	CD4_8hr_vs_unstim	up
OCR_15063	chr1	222593679	222594676	-2.58528	4.9464	119.189	9.63e-28	7.8e-26	CD4_8hr_vs_unstim	down
OCR_154741	chr7	51190923	51191854	3.39349	4.24092	119.177	9.69e-28	7.84e-26	CD4_8hr_vs_unstim	up
OCR_7085	chr1	101593641	101594337	-2.90155	4.13687	119.087	1.01e-27	8.2e-26	CD4_8hr_vs_unstim	down
OCR_60479	chr16	11187954	11189344	2.91099	4.68618	119.02	1.05e-27	8.47e-26	CD4_8hr_vs_unstim	up
OCR_155023	chr7	55063223	55064202	3.59627	3.9151	119.008	1.06e-27	8.51e-26	CD4_8hr_vs_unstim	up
OCR_127144	chr4	185713904	185715197	3.08442	4.33698	118.991	1.06e-27	8.58e-26	CD4_8hr_vs_unstim	up
OCR_35891	chr12	28342083	28342539	3.96732	3.35792	118.957	1.08e-27	8.71e-26	CD4_8hr_vs_unstim	up
OCR_76556	chr19	41221464	41222459	2.7878	4.74274	118.949	1.09e-27	8.74e-26	CD4_8hr_vs_unstim	up
OCR_153178	chr7	22294889	22295809	4.29187	3.40382	118.927	1.11e-27	8.92e-26	CD4_8hr_vs_unstim	up
OCR_26350	chr11	20389197	20389519	4.19307	3.03852	118.847	1.15e-27	9.2e-26	CD4_8hr_vs_unstim	up
OCR_154653	chr7	50304354	50305137	3.22184	4.08022	118.78	1.18e-27	9.49e-26	CD4_8hr_vs_unstim	up
OCR_131806	chr5	78856790	78857720	4.00771	3.49676	118.763	1.19e-27	9.56e-26	CD4_8hr_vs_unstim	up
OCR_45792	chr13	41092522	41093159	3.94418	3.41144	118.703	1.23e-27	9.84e-26	CD4_8hr_vs_unstim	up
OCR_21016	chr10	64570933	64571659	3.3158	3.97065	118.662	1.26e-27	1e-25	CD4_8hr_vs_unstim	up
OCR_162997	chr8	12468310	12469046	4.74317	3.19128	118.654	1.26e-27	1.01e-25	CD4_8hr_vs_unstim	up
OCR_158147	chr7	106358479	106359324	3.06413	4.24802	118.625	1.28e-27	1.02e-25	CD4_8hr_vs_unstim	up
OCR_119591	chr4	68579549	68580431	3.95917	3.40657	118.612	1.29e-27	1.03e-25	CD4_8hr_vs_unstim	up
OCR_65225	chr17	28740169	28740596	5.37803	2.11454	118.573	1.31e-27	1.05e-25	CD4_8hr_vs_unstim	up
OCR_155055	chr7	55536894	55537720	-2.97609	3.83752	118.571	1.32e-27	1.05e-25	CD4_8hr_vs_unstim	down
OCR_138457	chr6	7148172	7149107	4.10772	2.9024	118.563	1.32e-27	1.05e-25	CD4_8hr_vs_unstim	up
OCR_111409	chr3	130614965	130615245	3.53459	3.60109	118.559	1.32e-27	1.05e-25	CD4_8hr_vs_unstim	up
OCR_2534	chr1	42748475	42749171	3.99708	3.26307	118.524	1.35e-27	1.07e-25	CD4_8hr_vs_unstim	up
OCR_17542	chr10	11274048	11274620	3.89758	3.52564	118.497	1.37e-27	1.08e-25	CD4_8hr_vs_unstim	up
OCR_80612	chr2	48341175	48341866	3.66008	3.3289	118.496	1.37e-27	1.08e-25	CD4_8hr_vs_unstim	up
OCR_46017	chr13	43635723	43636585	4.2567	3.08617	118.481	1.38e-27	1.09e-25	CD4_8hr_vs_unstim	up
OCR_53667	chr14	62087077	62087698	4.68207	2.86174	118.461	1.39e-27	1.1e-25	CD4_8hr_vs_unstim	up
OCR_69014	chr17	75838536	75839229	4.14961	2.71477	118.443	1.4e-27	1.11e-25	CD4_8hr_vs_unstim	up
OCR_161939	chr7	148611371	148612163	3.70937	3.59692	118.376	1.45e-27	1.14e-25	CD4_8hr_vs_unstim	up
OCR_91201	chr2	192436969	192437416	4.2978	2.93478	118.329	1.49e-27	1.17e-25	CD4_8hr_vs_unstim	up
OCR_101891	chr22	32878768	32879285	4.97621	2.70092	118.294	1.51e-27	1.19e-25	CD4_8hr_vs_unstim	up
OCR_52046	chr14	38064763	38065591	2.8319	5.07613	118.167	1.61e-27	1.27e-25	CD4_8hr_vs_unstim	up
OCR_1752	chr1	28836873	28838300	3.33609	3.87983	118.15	1.63e-27	1.28e-25	CD4_8hr_vs_unstim	up
OCR_17765	chr10	14451117	14451868	4.03986	3.05105	118.085	1.68e-27	1.32e-25	CD4_8hr_vs_unstim	up
OCR_106349	chr3	66274691	66275011	4.2352	3.24064	118.078	1.69e-27	1.32e-25	CD4_8hr_vs_unstim	up
OCR_2485	chr1	42206999	42207308	3.87091	3.06882	118.068	1.69e-27	1.33e-25	CD4_8hr_vs_unstim	up
OCR_148777	chr6	135858759	135859528	3.33447	3.68837	118.064	1.7e-27	1.33e-25	CD4_8hr_vs_unstim	up
OCR_157279	chr7	92745065	92745603	3.49931	3.78768	118.062	1.7e-27	1.33e-25	CD4_8hr_vs_unstim	up
OCR_11036	chr1	180540924	180541869	4.06258	3.4811	118.041	1.72e-27	1.34e-25	CD4_8hr_vs_unstim	up
OCR_18445	chr10	23654400	23654671	4.16555	3.05202	118.04	1.72e-27	1.34e-25	CD4_8hr_vs_unstim	up
OCR_137163	chr5	162861355	162861805	3.89425	3.1775	118.031	1.73e-27	1.34e-25	CD4_8hr_vs_unstim	up
OCR_147097	chr6	119418886	119419663	3.84235	3.18693	118.013	1.74e-27	1.35e-25	CD4_8hr_vs_unstim	up
OCR_87056	chr2	152676316	152677180	3.90043	3.68278	117.985	1.77e-27	1.37e-25	CD4_8hr_vs_unstim	up
OCR_95574	chr20	1605542	1606624	3.98673	3.06485	117.958	1.79e-27	1.39e-25	CD4_8hr_vs_unstim	up
OCR_174285	chr9	92036991	92037499	3.70377	3.50165	117.91	1.84e-27	1.42e-25	CD4_8hr_vs_unstim	up
OCR_167950	chr8	103579659	103580761	3.51221	3.71531	117.892	1.85e-27	1.43e-25	CD4_8hr_vs_unstim	up
OCR_123221	chr4	124578666	124579519	4.21581	3.15029	117.878	1.87e-27	1.44e-25	CD4_8hr_vs_unstim	up
OCR_101863	chr22	32225130	32226015	4.81527	2.68049	117.865	1.88e-27	1.45e-25	CD4_8hr_vs_unstim	up
OCR_158621	chr7	110753294	110754249	3.69736	3.55763	117.803	1.94e-27	1.49e-25	CD4_8hr_vs_unstim	up
OCR_153878	chr7	36030943	36032077	4.35479	2.73749	117.752	1.99e-27	1.53e-25	CD4_8hr_vs_unstim	up
OCR_18523	chr10	24911085	24911519	-2.92591	3.92873	117.724	2.02e-27	1.55e-25	CD4_8hr_vs_unstim	down
OCR_19579	chr10	46076997	46077642	3.32801	3.85882	117.708	2.03e-27	1.56e-25	CD4_8hr_vs_unstim	up
OCR_63266	chr16	85956834	85958723	4.03757	3.24686	117.654	2.09e-27	1.6e-25	CD4_8hr_vs_unstim	up
OCR_1108	chr1	21348654	21349723	3.72505	3.15478	117.605	2.15e-27	1.65e-25	CD4_8hr_vs_unstim	up
OCR_168316	chr8	110207693	110208474	4.45863	3.57435	117.532	2.22e-27	1.7e-25	CD4_8hr_vs_unstim	up
OCR_30083	chr11	85939426	85940355	4.15467	3.51243	117.505	2.25e-27	1.72e-25	CD4_8hr_vs_unstim	up
OCR_14981	chr1	221612729	221613064	2.95241	4.64434	117.456	2.31e-27	1.77e-25	CD4_8hr_vs_unstim	up
OCR_83839	chr2	102753531	102753982	5.39099	2.37776	117.454	2.31e-27	1.77e-25	CD4_8hr_vs_unstim	up
OCR_110271	chr3	112056911	112057567	3.28312	3.89268	117.445	2.32e-27	1.77e-25	CD4_8hr_vs_unstim	up
OCR_109984	chr3	108581166	108582869	2.44552	5.51691	117.436	2.33e-27	1.78e-25	CD4_8hr_vs_unstim	up
OCR_64583	chr17	16132669	16133366	4.31475	2.8586	117.377	2.4e-27	1.83e-25	CD4_8hr_vs_unstim	up
OCR_110817	chr3	119419239	119419983	3.54687	3.77191	117.357	2.43e-27	1.85e-25	CD4_8hr_vs_unstim	up
OCR_24912	chr10	129789218	129789875	3.18272	4.31342	117.351	2.43e-27	1.85e-25	CD4_8hr_vs_unstim	up
OCR_18440	chr10	23624005	23624561	4.38069	3.23253	117.318	2.47e-27	1.88e-25	CD4_8hr_vs_unstim	up
OCR_124441	chr4	141077600	141078014	2.98176	4.39932	117.319	2.47e-27	1.88e-25	CD4_8hr_vs_unstim	up
OCR_58472	chr15	70049627	70049906	3.88862	3.06215	117.291	2.51e-27	1.9e-25	CD4_8hr_vs_unstim	up
OCR_22136	chr10	81090997	81092162	2.90731	4.7439	117.189	2.64e-27	2e-25	CD4_8hr_vs_unstim	up
OCR_93830	chr2	217060261	217060718	4.8143	3.17525	117.184	2.65e-27	2.01e-25	CD4_8hr_vs_unstim	up
OCR_169647	chr8	128237313	128238159	4.34804	2.76309	117.145	2.7e-27	2.04e-25	CD4_8hr_vs_unstim	up
OCR_106143	chr3	59545189	59546177	3.5728	3.63837	117.115	2.74e-27	2.07e-25	CD4_8hr_vs_unstim	up
OCR_96532	chr20	24967935	24968299	4.65899	2.37313	117.083	2.78e-27	2.1e-25	CD4_8hr_vs_unstim	up
OCR_79526	chr2	30633018	30633980	3.57562	3.34498	117.053	2.83e-27	2.13e-25	CD4_8hr_vs_unstim	up
OCR_439	chr1	8739042	8739783	4.34907	2.91409	117.064	2.84e-27	2.14e-25	CD4_8hr_vs_unstim	up
OCR_148791	chr6	135968568	135969282	3.80381	3.45279	117	2.9e-27	2.19e-25	CD4_8hr_vs_unstim	up
OCR_53388	chr14	57527073	57528043	3.92797	3.7326	116.965	2.96e-27	2.22e-25	CD4_8hr_vs_unstim	up
OCR_180446	chrX	138926146	138926776	4.26297	2.878	116.952	2.97e-27	2.23e-25	CD4_8hr_vs_unstim	up
OCR_29487	chr11	75037090	75037892	3.62735	3.31944	116.941	2.99e-27	2.24e-25	CD4_8hr_vs_unstim	up
OCR_69874	chr18	9016895	9018024	3.22893	4.10728	116.939	2.99e-27	2.24e-25	CD4_8hr_vs_unstim	up
OCR_116435	chr4	10672828	10674046	-2.57397	4.92889	116.805	3.2e-27	2.4e-25	CD4_8hr_vs_unstim	down
OCR_17544	chr10	11277114	11277676	3.62889	3.52423	116.639	3.48e-27	2.61e-25	CD4_8hr_vs_unstim	up
OCR_5602	chr1	85085489	85085731	4.65073	2.46803	116.58	3.59e-27	2.68e-25	CD4_8hr_vs_unstim	up
OCR_127331	chr5	458798	459579	4.49881	2.88754	116.451	3.83e-27	2.86e-25	CD4_8hr_vs_unstim	up
OCR_43389	chr12	104674263	104674908	4.21493	2.65631	116.379	3.97e-27	2.96e-25	CD4_8hr_vs_unstim	up
OCR_54295	chr14	72021781	72023146	2.35749	5.65112	116.375	3.98e-27	2.96e-25	CD4_8hr_vs_unstim	up
OCR_30141	chr11	86963697	86964674	3.86464	3.55217	116.369	3.99e-27	2.97e-25	CD4_8hr_vs_unstim	up
OCR_118445	chr4	48339884	48340033	4.80421	2.68932	116.364	4e-27	2.98e-25	CD4_8hr_vs_unstim	up
OCR_109121	chr3	101682441	101683310	3.50789	3.91597	116.34	4.05e-27	3.01e-25	CD4_8hr_vs_unstim	up
OCR_100442	chr21	36460495	36461228	5.39755	2.51682	116.331	4.07e-27	3.02e-25	CD4_8hr_vs_unstim	up
OCR_66460	chr17	45796754	45797107	4.06917	2.8563	116.264	4.21e-27	3.12e-25	CD4_8hr_vs_unstim	up
OCR_137036	chr5	159891446	159891906	3.80034	3.37026	116.264	4.21e-27	3.12e-25	CD4_8hr_vs_unstim	up
OCR_33853	chr12	9396473	9397144	4.51461	3.12161	116.258	4.22e-27	3.12e-25	CD4_8hr_vs_unstim	up
OCR_29224	chr11	68933736	68934947	3.8108	3.3359	116.232	4.27e-27	3.16e-25	CD4_8hr_vs_unstim	up
OCR_22734	chr10	89876503	89877639	2.76795	4.75563	116.222	4.3e-27	3.17e-25	CD4_8hr_vs_unstim	up
OCR_106083	chr3	58309603	58310563	4.3042	3.15088	116.192	4.36e-27	3.22e-25	CD4_8hr_vs_unstim	up
OCR_102425	chr22	40620723	40621255	3.58665	3.13443	116.152	4.45e-27	3.28e-25	CD4_8hr_vs_unstim	up
OCR_2465	chr1	42104913	42106138	3.1449	4.1277	116.128	4.51e-27	3.32e-25	CD4_8hr_vs_unstim	up
OCR_161944	chr7	148636289	148636863	4.90111	2.89423	116.102	4.57e-27	3.36e-25	CD4_8hr_vs_unstim	up
OCR_50317	chr13	100008546	100009067	-2.9481	3.92399	116.091	4.61e-27	3.39e-25	CD4_8hr_vs_unstim	down
OCR_123195	chr4	124350729	124351915	3.901	2.95098	116.083	4.61e-27	3.39e-25	CD4_8hr_vs_unstim	up
OCR_39089	chr12	65598634	65599558	3.76418	3.50895	116.056	4.67e-27	3.43e-25	CD4_8hr_vs_unstim	up
OCR_105337	chr3	43546796	43547391	4.20586	3.04593	116.053	4.68e-27	3.43e-25	CD4_8hr_vs_unstim	up
OCR_75987	chr19	31705908	31706235	4.56685	2.79205	116.028	4.74e-27	3.47e-25	CD4_8hr_vs_unstim	up
OCR_81078	chr2	54268230	54268921	3.36481	3.94251	116.021	4.76e-27	3.48e-25	CD4_8hr_vs_unstim	up
OCR_144609	chr6	91029760	91030541	4.33843	3.32895	116.01	4.78e-27	3.5e-25	CD4_8hr_vs_unstim	up
OCR_23032	chr10	93735171	93735595	4.94342	2.48156	115.952	4.92e-27	3.6e-25	CD4_8hr_vs_unstim	up
OCR_1533	chr1	26602452	26603084	2.99049	4.32159	115.937	4.96e-27	3.62e-25	CD4_8hr_vs_unstim	up
OCR_64603	chr17	16322436	16322765	4.2326	3.05316	115.915	5.02e-27	3.66e-25	CD4_8hr_vs_unstim	up
OCR_16939	chr10	3731838	3732359	4.53355	2.57639	115.883	5.1e-27	3.71e-25	CD4_8hr_vs_unstim	up
OCR_75725	chr19	21205921	21206209	4.00691	3.04729	115.815	5.28e-27	3.84e-25	CD4_8hr_vs_unstim	up
OCR_111108	chr3	124720578	124721906	-2.87774	4.06614	115.782	5.36e-27	3.9e-25	CD4_8hr_vs_unstim	down
OCR_153262	chr7	23416799	23417126	4.18756	2.7547	115.733	5.5e-27	3.99e-25	CD4_8hr_vs_unstim	up
OCR_102261	chr22	39380956	39381571	3.36245	3.62947	115.757	5.56e-27	4.03e-25	CD4_8hr_vs_unstim	up
OCR_5849	chr1	87799416	87799684	3.31789	4.04824	115.674	5.66e-27	4.11e-25	CD4_8hr_vs_unstim	up
OCR_79490	chr2	30458627	30459087	3.09848	4.17491	115.664	5.69e-27	4.12e-25	CD4_8hr_vs_unstim	up
OCR_105796	chr3	51709158	51709669	4.15963	2.73281	115.587	5.92e-27	4.28e-25	CD4_8hr_vs_unstim	up
OCR_1153	chr1	22106271	22106630	4.08149	2.88827	115.576	5.95e-27	4.3e-25	CD4_8hr_vs_unstim	up
OCR_24049	chr10	111860971	111862034	4.26479	3.21445	115.559	6e-27	4.34e-25	CD4_8hr_vs_unstim	up
OCR_66054	chr17	40441862	40442314	3.28692	3.54148	115.551	6.03e-27	4.35e-25	CD4_8hr_vs_unstim	up
OCR_138502	chr6	8065559	8066105	4.50414	3.13135	115.544	6.05e-27	4.36e-25	CD4_8hr_vs_unstim	up
OCR_87932	chr2	160457310	160457740	6.83906	1.92999	115.535	6.08e-27	4.38e-25	CD4_8hr_vs_unstim	up
OCR_146168	chr6	108191611	108191953	5.6501	2.40511	115.482	6.24e-27	4.49e-25	CD4_8hr_vs_unstim	up
OCR_33283	chr12	957363	958578	4.24351	2.8244	115.464	6.3e-27	4.53e-25	CD4_8hr_vs_unstim	up
OCR_115316	chr3	187524812	187525468	4.09947	2.97095	115.426	6.42e-27	4.61e-25	CD4_8hr_vs_unstim	up
OCR_57976	chr15	62411517	62412019	4.20859	3.02374	115.401	6.5e-27	4.66e-25	CD4_8hr_vs_unstim	up
OCR_35582	chr12	25053945	25054448	3.46002	3.95197	115.397	6.52e-27	4.67e-25	CD4_8hr_vs_unstim	up
OCR_17028	chr10	4728364	4729312	4.05517	3.33559	115.373	6.62e-27	4.74e-25	CD4_8hr_vs_unstim	up
OCR_117906	chr4	38668681	38669164	-2.68317	4.61431	115.355	6.65e-27	4.76e-25	CD4_8hr_vs_unstim	down
OCR_16696	chr1	247584390	247584910	3.8757	3.00466	115.3	6.84e-27	4.89e-25	CD4_8hr_vs_unstim	up
OCR_1133	chr1	21650709	21652342	2.59729	5.01614	115.233	7.08e-27	5.05e-25	CD4_8hr_vs_unstim	up
OCR_9696	chr1	158939603	158939996	6.07769	2.27169	115.218	7.13e-27	5.08e-25	CD4_8hr_vs_unstim	up
OCR_131455	chr5	71530024	71530647	3.42878	3.70379	115.162	7.34e-27	5.23e-25	CD4_8hr_vs_unstim	up
OCR_112622	chr3	151022765	151023850	3.75678	3.83976	115.153	7.37e-27	5.25e-25	CD4_8hr_vs_unstim	up
OCR_100395	chr21	36307768	36308079	4.04218	2.79016	115.141	7.41e-27	5.27e-25	CD4_8hr_vs_unstim	up
OCR_74454	chr19	5961631	5962806	-2.60382	4.73991	115.102	7.56e-27	5.37e-25	CD4_8hr_vs_unstim	down
OCR_173459	chr9	74473430	74474323	4.61006	3.03729	115.102	7.57e-27	5.37e-25	CD4_8hr_vs_unstim	up
OCR_137004	chr5	159205808	159206348	8.8697	1.85535	115.061	7.72e-27	5.47e-25	CD4_8hr_vs_unstim	up
OCR_169759	chr8	129179739	129180645	3.56743	3.44805	115.014	7.95e-27	5.63e-25	CD4_8hr_vs_unstim	up
OCR_99420	chr21	23908693	23909271	4.07549	3.7583	114.976	8.05e-27	5.7e-25	CD4_8hr_vs_unstim	up
OCR_56546	chr15	34531593	34532275	5.07008	2.60116	114.974	8.06e-27	5.7e-25	CD4_8hr_vs_unstim	up
OCR_79835	chr2	36224433	36225124	4.67767	2.53529	114.905	8.35e-27	5.9e-25	CD4_8hr_vs_unstim	up
OCR_19159	chr10	33425801	33426096	3.40771	3.7112	114.791	8.84e-27	6.24e-25	CD4_8hr_vs_unstim	up
OCR_160692	chr7	130655575	130656438	3.75218	3.49451	114.705	9.23e-27	6.51e-25	CD4_8hr_vs_unstim	up
OCR_8927	chr1	147011493	147011879	3.92882	3.09166	114.686	9.34e-27	6.58e-25	CD4_8hr_vs_unstim	up
OCR_91861	chr2	197008322	197008932	3.22371	3.87158	114.668	9.4e-27	6.62e-25	CD4_8hr_vs_unstim	up
OCR_40244	chr12	76327928	76328903	3.28103	4.0148	114.634	9.57e-27	6.73e-25	CD4_8hr_vs_unstim	up
OCR_153593	chr7	29283448	29284313	3.18413	4.41702	114.582	9.82e-27	6.9e-25	CD4_8hr_vs_unstim	up
OCR_8818	chr1	144907792	144909086	3.04993	4.08088	114.517	1.02e-26	7.13e-25	CD4_8hr_vs_unstim	up
OCR_121664	chr4	103456959	103457333	4.47982	2.8104	114.454	1.05e-26	7.35e-25	CD4_8hr_vs_unstim	up
OCR_3750	chr1	67807761	67808390	3.8977	3.13212	114.423	1.06e-26	7.46e-25	CD4_8hr_vs_unstim	up
OCR_129935	chr5	40831961	40832293	3.90358	3.01869	114.383	1.09e-26	7.61e-25	CD4_8hr_vs_unstim	up
OCR_94972	chr2	233646279	233646909	4.40156	2.646	114.379	1.09e-26	7.61e-25	CD4_8hr_vs_unstim	up
OCR_67306	chr17	54993209	54993572	3.71382	3.32246	114.319	1.12e-26	7.84e-25	CD4_8hr_vs_unstim	up
OCR_14209	chr1	210012806	210013884	4.03808	3.07587	114.317	1.12e-26	7.84e-25	CD4_8hr_vs_unstim	up
OCR_3518	chr1	65371857	65372635	3.39413	3.52998	114.283	1.14e-26	7.97e-25	CD4_8hr_vs_unstim	up
OCR_154019	chr7	37451133	37451597	4.00845	3.03123	114.277	1.15e-26	7.99e-25	CD4_8hr_vs_unstim	up
OCR_5645	chr1	85424838	85425461	3.95724	3.37627	114.267	1.15e-26	8.02e-25	CD4_8hr_vs_unstim	up
OCR_39390	chr12	68671380	68672054	3.73372	3.14044	114.26	1.16e-26	8.04e-25	CD4_8hr_vs_unstim	up
OCR_61461	chr16	31888638	31889133	3.08117	4.07073	114.185	1.2e-26	8.35e-25	CD4_8hr_vs_unstim	up
OCR_28616	chr11	61792404	61793704	-2.60588	4.71188	114.153	1.22e-26	8.47e-25	CD4_8hr_vs_unstim	down
OCR_144527	chr6	90797671	90798215	4.17659	2.86971	114.143	1.23e-26	8.51e-25	CD4_8hr_vs_unstim	up
OCR_50416	chr13	101044885	101045536	3.56786	3.60361	114.043	1.29e-26	8.94e-25	CD4_8hr_vs_unstim	up
OCR_99792	chr21	26863122	26863563	4.61188	2.74757	114.031	1.3e-26	8.98e-25	CD4_8hr_vs_unstim	up
OCR_48231	chr13	74496796	74497853	3.68891	3.41964	114.006	1.31e-26	9.09e-25	CD4_8hr_vs_unstim	up
OCR_147067	chr6	119164844	119165637	3.94773	3.72905	113.974	1.33e-26	9.23e-25	CD4_8hr_vs_unstim	up
OCR_25469	chr11	4111482	4111864	-3.0255	3.38382	113.928	1.37e-26	9.44e-25	CD4_8hr_vs_unstim	down
OCR_106772	chr3	72309024	72309805	3.8062	3.47013	113.906	1.38e-26	9.53e-25	CD4_8hr_vs_unstim	up
OCR_130063	chr5	43315886	43316074	4.76543	3.01092	113.879	1.4e-26	9.67e-25	CD4_8hr_vs_unstim	up
OCR_135902	chr5	138480805	138481571	5.10765	2.63858	113.837	1.43e-26	9.85e-25	CD4_8hr_vs_unstim	up
OCR_136178	chr5	142201321	142202084	3.72308	3.40464	113.805	1.45e-26	1e-24	CD4_8hr_vs_unstim	up
OCR_3744	chr1	67798410	67799308	2.63206	5.14321	113.796	1.46e-26	1e-24	CD4_8hr_vs_unstim	up
OCR_2490	chr1	42220203	42220786	3.72735	3.05909	113.744	1.5e-26	1.03e-24	CD4_8hr_vs_unstim	up
OCR_139489	chr6	24974267	24975380	3.47653	3.57258	113.743	1.5e-26	1.03e-24	CD4_8hr_vs_unstim	up
OCR_69197	chr17	77777891	77778926	3.05155	4.11049	113.72	1.52e-26	1.04e-24	CD4_8hr_vs_unstim	up
OCR_154636	chr7	50195358	50196786	2.86948	4.64157	113.669	1.56e-26	1.07e-24	CD4_8hr_vs_unstim	up
OCR_170880	chr9	5768187	5769101	3.59833	3.78301	113.665	1.56e-26	1.07e-24	CD4_8hr_vs_unstim	up
OCR_141968	chr6	56458435	56459172	2.84525	5.07422	113.652	1.57e-26	1.07e-24	CD4_8hr_vs_unstim	up
OCR_18882	chr10	29970582	29971349	-2.484	5.0124	113.594	1.62e-26	1.1e-24	CD4_8hr_vs_unstim	down
OCR_33476	chr12	4089866	4090412	5.06584	2.30847	113.595	1.62e-26	1.1e-24	CD4_8hr_vs_unstim	up
OCR_42286	chr12	91886931	91887438	4.72727	2.49173	113.596	1.61e-26	1.1e-24	CD4_8hr_vs_unstim	up
OCR_458	chr1	8959728	8960669	3.13434	3.9249	113.557	1.65e-26	1.12e-24	CD4_8hr_vs_unstim	up
OCR_27332	chr11	35268892	35269935	-2.67523	4.50919	113.531	1.67e-26	1.14e-24	CD4_8hr_vs_unstim	down
OCR_171774	chr9	20865254	20865743	4.02005	2.6479	113.516	1.68e-26	1.14e-24	CD4_8hr_vs_unstim	up
OCR_57760	chr15	58746491	58747296	3.80356	2.92906	113.511	1.69e-26	1.15e-24	CD4_8hr_vs_unstim	up
OCR_130479	chr5	52304570	52305069	3.8544	3.51498	113.487	1.71e-26	1.16e-24	CD4_8hr_vs_unstim	up
OCR_54515	chr14	76025884	76026605	4.42165	2.78951	113.435	1.75e-26	1.19e-24	CD4_8hr_vs_unstim	up
OCR_83316	chr2	88899467	88900180	2.7856	4.71223	113.401	1.78e-26	1.21e-24	CD4_8hr_vs_unstim	up
OCR_73728	chr18	74433021	74434317	-2.56796	4.82731	113.273	1.9e-26	1.29e-24	CD4_8hr_vs_unstim	down
OCR_13238	chr1	198222778	198223401	3.36046	3.84937	113.262	1.91e-26	1.29e-24	CD4_8hr_vs_unstim	up
OCR_86816	chr2	149408517	149408820	3.3935	3.50096	113.258	1.91e-26	1.29e-24	CD4_8hr_vs_unstim	up
OCR_115006	chr3	182876147	182876840	3.78314	3.19101	113.249	1.92e-26	1.3e-24	CD4_8hr_vs_unstim	up
OCR_76324	chr19	38571478	38572125	4.69172	2.80346	113.239	1.93e-26	1.3e-24	CD4_8hr_vs_unstim	up
OCR_55509	chr14	98567698	98568091	6.01084	2.00107	113.195	1.98e-26	1.33e-24	CD4_8hr_vs_unstim	up
OCR_173307	chr9	71634633	71635264	-3.09991	3.12121	113.171	2e-26	1.35e-24	CD4_8hr_vs_unstim	down
OCR_101700	chr22	30014002	30014713	4.74197	2.41288	113.18	2.01e-26	1.35e-24	CD4_8hr_vs_unstim	up
OCR_37556	chr12	50143780	50144784	2.98443	4.27724	113.148	2.02e-26	1.36e-24	CD4_8hr_vs_unstim	up
OCR_30511	chr11	93868040	93869031	3.42087	3.97982	113.116	2.06e-26	1.38e-24	CD4_8hr_vs_unstim	up
OCR_45729	chr13	40600097	40601213	2.96618	4.45323	113.107	2.07e-26	1.39e-24	CD4_8hr_vs_unstim	up
OCR_146507	chr6	112475452	112476357	4.00861	3.13963	113.06	2.12e-26	1.42e-24	CD4_8hr_vs_unstim	up
OCR_133135	chr5	96255358	96256107	3.7877	3.39843	113.031	2.15e-26	1.44e-24	CD4_8hr_vs_unstim	up
OCR_136588	chr5	150533538	150533895	4.16437	2.86319	112.999	2.18e-26	1.46e-24	CD4_8hr_vs_unstim	up
OCR_98501	chr21	16406483	16407128	3.39896	3.70647	112.925	2.26e-26	1.51e-24	CD4_8hr_vs_unstim	up
OCR_122413	chr4	114276592	114277653	2.16166	6.14006	112.919	2.27e-26	1.52e-24	CD4_8hr_vs_unstim	up
OCR_100068	chr21	31028842	31029655	3.56679	3.56521	112.838	2.37e-26	1.58e-24	CD4_8hr_vs_unstim	up
OCR_64566	chr17	15862133	15862956	2.92361	4.45952	112.813	2.4e-26	1.6e-24	CD4_8hr_vs_unstim	up
OCR_32827	chr11	126175642	126175953	4.37676	2.66783	112.795	2.42e-26	1.61e-24	CD4_8hr_vs_unstim	up
OCR_127070	chr4	185158283	185159301	3.37636	3.62846	112.793	2.42e-26	1.61e-24	CD4_8hr_vs_unstim	up
OCR_8134	chr1	110778402	110779421	3.78932	3.34467	112.731	2.5e-26	1.66e-24	CD4_8hr_vs_unstim	up
OCR_123193	chr4	124341246	124341698	3.64101	3.48338	112.601	2.67e-26	1.77e-24	CD4_8hr_vs_unstim	up
OCR_177399	chrX	19803473	19804302	3.71396	3.16226	112.526	2.77e-26	1.84e-24	CD4_8hr_vs_unstim	up
OCR_92394	chr2	201993707	201994643	2.91435	4.45598	112.507	2.8e-26	1.86e-24	CD4_8hr_vs_unstim	up
OCR_89155	chr2	173302221	173303145	2.61963	4.92058	112.504	2.8e-26	1.86e-24	CD4_8hr_vs_unstim	up
OCR_72034	chr18	55930243	55931261	4.45741	2.68731	112.485	2.83e-26	1.87e-24	CD4_8hr_vs_unstim	up
OCR_106043	chr3	57791372	57791941	3.52157	3.19465	112.421	2.92e-26	1.93e-24	CD4_8hr_vs_unstim	up
OCR_109680	chr3	106053126	106053601	3.29447	3.71235	112.377	2.99e-26	1.98e-24	CD4_8hr_vs_unstim	up
OCR_94577	chr2	228327109	228327603	3.36152	3.93593	112.348	3.03e-26	2e-24	CD4_8hr_vs_unstim	up
OCR_150606	chr6	158221498	158222379	3.54636	3.55792	112.356	3.06e-26	2.02e-24	CD4_8hr_vs_unstim	up
OCR_34159	chr12	12635057	12636018	-2.5464	4.78829	112.312	3.08e-26	2.04e-24	CD4_8hr_vs_unstim	down
OCR_32006	chr11	110219627	110220954	3.30268	4.37326	112.27	3.15e-26	2.08e-24	CD4_8hr_vs_unstim	up
OCR_8939	chr1	147089679	147090507	3.66158	3.55059	112.268	3.15e-26	2.08e-24	CD4_8hr_vs_unstim	up
OCR_62446	chr16	67951785	67952332	4.38659	2.64007	112.246	3.19e-26	2.1e-24	CD4_8hr_vs_unstim	up
OCR_76560	chr19	41260843	41261111	4.39146	2.49454	112.22	3.23e-26	2.12e-24	CD4_8hr_vs_unstim	up
OCR_166292	chr8	81259114	81259434	3.59817	3.50766	112.219	3.23e-26	2.12e-24	CD4_8hr_vs_unstim	up
OCR_91853	chr2	196965580	196966310	3.58249	3.54204	112.208	3.25e-26	2.13e-24	CD4_8hr_vs_unstim	up
OCR_104841	chr3	33064444	33065851	3.00298	4.27823	112.154	3.34e-26	2.19e-24	CD4_8hr_vs_unstim	up
OCR_745	chr1	12578977	12580031	3.93225	2.95235	112.115	3.41e-26	2.23e-24	CD4_8hr_vs_unstim	up
OCR_68057	chr17	64663312	64664107	2.6334	4.91076	112.109	3.42e-26	2.24e-24	CD4_8hr_vs_unstim	up
OCR_50041	chr13	95828641	95829580	-2.68992	4.50992	112.105	3.42e-26	2.24e-24	CD4_8hr_vs_unstim	down
OCR_93897	chr2	218088017	218088675	3.31254	4.25874	112.102	3.44e-26	2.25e-24	CD4_8hr_vs_unstim	up
OCR_8673	chr1	118506712	118507645	4.77356	2.97565	112.042	3.54e-26	2.31e-24	CD4_8hr_vs_unstim	up
OCR_22912	chr10	91986929	91987435	4.01197	3.78968	112.008	3.6e-26	2.35e-24	CD4_8hr_vs_unstim	up
OCR_166163	chr8	79521536	79521872	4.60992	2.68577	112.001	3.61e-26	2.35e-24	CD4_8hr_vs_unstim	up
OCR_3168	chr1	55752508	55753859	3.78727	3.20647	111.981	3.64e-26	2.37e-24	CD4_8hr_vs_unstim	up
OCR_81535	chr2	61126322	61127469	3.58718	3.36599	111.923	3.75e-26	2.44e-24	CD4_8hr_vs_unstim	up
OCR_53991	chr14	68677240	68678197	2.70545	4.79396	111.857	3.88e-26	2.52e-24	CD4_8hr_vs_unstim	up
OCR_124511	chr4	143193574	143193965	5.59513	2.19659	111.791	4.01e-26	2.61e-24	CD4_8hr_vs_unstim	up
OCR_48381	chr13	76345978	76346773	4.16268	2.88453	111.788	4.02e-26	2.61e-24	CD4_8hr_vs_unstim	up
OCR_89907	chr2	182182184	182182666	6.01469	2.31703	111.772	4.05e-26	2.63e-24	CD4_8hr_vs_unstim	up
OCR_111009	chr3	122294993	122295732	3.17991	4.33226	111.719	4.16e-26	2.7e-24	CD4_8hr_vs_unstim	up
OCR_10650	chr1	172685314	172686180	3.61066	2.954	111.707	4.19e-26	2.71e-24	CD4_8hr_vs_unstim	up
OCR_8116	chr1	110583196	110583722	4.32115	2.30483	111.705	4.19e-26	2.71e-24	CD4_8hr_vs_unstim	up
OCR_95335	chr2	240470141	240470767	3.22095	3.86244	111.689	4.22e-26	2.73e-24	CD4_8hr_vs_unstim	up
OCR_153943	chr7	36820461	36820999	-2.85221	3.98915	111.666	4.27e-26	2.76e-24	CD4_8hr_vs_unstim	down
OCR_9523	chr1	156192564	156193234	4.38425	2.88114	111.643	4.32e-26	2.79e-24	CD4_8hr_vs_unstim	up
OCR_97251	chr20	42698719	42699594	-2.71025	4.33207	111.601	4.42e-26	2.85e-24	CD4_8hr_vs_unstim	down
OCR_66455	chr17	45782699	45783576	3.40591	3.55475	111.593	4.43e-26	2.86e-24	CD4_8hr_vs_unstim	up
OCR_71974	chr18	54671738	54672425	3.08117	4.25455	111.553	4.52e-26	2.91e-24	CD4_8hr_vs_unstim	up
OCR_24217	chr10	114148915	114149787	2.72142	4.85584	111.552	4.53e-26	2.91e-24	CD4_8hr_vs_unstim	up
OCR_17119	chr10	6094157	6095442	2.66842	4.83687	111.506	4.63e-26	2.98e-24	CD4_8hr_vs_unstim	up
OCR_161365	chr7	141257724	141259039	3.50573	3.85663	111.493	4.66e-26	2.99e-24	CD4_8hr_vs_unstim	up
OCR_23771	chr10	106695372	106695775	-3.42861	2.66921	111.491	4.68e-26	3e-24	CD4_8hr_vs_unstim	down
OCR_361	chr1	8000445	8001611	3.90162	2.90656	111.468	4.72e-26	3.02e-24	CD4_8hr_vs_unstim	up
OCR_59256	chr15	86254849	86255384	4.83105	2.10804	111.469	4.72e-26	3.02e-24	CD4_8hr_vs_unstim	up
OCR_78583	chr2	12694877	12695706	3.08445	4.00425	111.446	4.77e-26	3.05e-24	CD4_8hr_vs_unstim	up
OCR_157243	chr7	92397997	92398840	3.80483	3.19034	111.395	4.9e-26	3.13e-24	CD4_8hr_vs_unstim	up
OCR_24780	chr10	125047152	125047940	3.73197	3.63647	111.378	4.94e-26	3.16e-24	CD4_8hr_vs_unstim	up
OCR_164288	chr8	41649463	41650572	2.88429	4.54147	111.359	4.99e-26	3.18e-24	CD4_8hr_vs_unstim	up
OCR_98427	chr21	15910892	15911207	3.96827	2.77003	111.335	5.05e-26	3.22e-24	CD4_8hr_vs_unstim	up
OCR_28428	chr11	58967233	58968029	3.51759	3.74818	111.313	5.11e-26	3.25e-24	CD4_8hr_vs_unstim	up
OCR_58668	chr15	74691851	74692084	5.0158	2.07132	111.311	5.11e-26	3.25e-24	CD4_8hr_vs_unstim	up
OCR_54367	chr14	73934071	73934978	3.29056	3.57401	111.297	5.15e-26	3.27e-24	CD4_8hr_vs_unstim	up
OCR_50320	chr13	100013427	100014070	-3.12992	2.91047	111.193	5.42e-26	3.45e-24	CD4_8hr_vs_unstim	down
OCR_115220	chr3	186251834	186252458	2.75643	4.70531	111.089	5.72e-26	3.63e-24	CD4_8hr_vs_unstim	up
OCR_23028	chr10	93704499	93705346	3.93899	3.21756	111.006	5.96e-26	3.78e-24	CD4_8hr_vs_unstim	up
OCR_35558	chr12	24872093	24872908	3.38472	3.76966	110.911	6.25e-26	3.96e-24	CD4_8hr_vs_unstim	up
OCR_175947	chr9	128394388	128395302	3.53089	3.36313	110.92	6.25e-26	3.96e-24	CD4_8hr_vs_unstim	up
OCR_169773	chr8	129263564	129264565	3.46389	3.50488	110.833	6.5e-26	4.12e-24	CD4_8hr_vs_unstim	up
OCR_110283	chr3	112124743	112125300	3.65755	2.97712	110.762	6.74e-26	4.26e-24	CD4_8hr_vs_unstim	up
OCR_78341	chr2	9692563	9693035	3.46356	3.43578	110.753	6.77e-26	4.28e-24	CD4_8hr_vs_unstim	up
OCR_131238	chr5	65257380	65257840	4.08869	2.72813	110.742	6.81e-26	4.3e-24	CD4_8hr_vs_unstim	up
OCR_3719	chr1	67624909	67625389	4.87121	2.66587	110.676	7.04e-26	4.44e-24	CD4_8hr_vs_unstim	up
OCR_72842	chr18	65027227	65027978	3.51595	3.80493	110.623	7.23e-26	4.56e-24	CD4_8hr_vs_unstim	up
OCR_55624	chr14	99728480	99729265	-2.771	4.3428	110.625	7.42e-26	4.67e-24	CD4_8hr_vs_unstim	down
OCR_134882	chr5	118699742	118700312	3.43214	3.47169	110.517	7.63e-26	4.8e-24	CD4_8hr_vs_unstim	up
OCR_3519	chr1	65377826	65378353	3.34603	3.67292	110.508	7.68e-26	4.83e-24	CD4_8hr_vs_unstim	up
OCR_138758	chr6	12163383	12163938	-3.14109	2.84855	110.479	7.78e-26	4.89e-24	CD4_8hr_vs_unstim	down
OCR_140689	chr6	37951517	37952458	3.93228	2.81643	110.448	7.9e-26	4.96e-24	CD4_8hr_vs_unstim	up
OCR_37621	chr12	50931363	50931670	5.02336	2.00392	110.444	7.92e-26	4.97e-24	CD4_8hr_vs_unstim	up
OCR_140012	chr6	30784928	30785502	4.53333	2.61269	110.437	7.94e-26	4.98e-24	CD4_8hr_vs_unstim	up
OCR_30069	chr11	85827254	85827900	3.8988	3.17058	110.376	8.19e-26	5.13e-24	CD4_8hr_vs_unstim	up
OCR_24899	chr10	129091233	129092409	-2.72661	4.36525	110.354	8.28e-26	5.18e-24	CD4_8hr_vs_unstim	down
OCR_106364	chr3	66519603	66520094	4.82289	2.85045	110.327	8.39e-26	5.25e-24	CD4_8hr_vs_unstim	up
OCR_116891	chr4	23410248	23411282	3.6595	3.32188	110.314	8.46e-26	5.28e-24	CD4_8hr_vs_unstim	up
OCR_176805	chrX	1590553	1591346	-2.72219	4.27389	110.308	8.47e-26	5.29e-24	CD4_8hr_vs_unstim	down
OCR_434	chr1	8721563	8722387	3.822	2.88142	110.284	8.58e-26	5.35e-24	CD4_8hr_vs_unstim	up
OCR_79891	chr2	36886967	36887665	5.05313	2.19364	110.182	9.03e-26	5.63e-24	CD4_8hr_vs_unstim	up
OCR_171858	chr9	21624575	21625299	3.72007	3.31182	110.174	9.07e-26	5.65e-24	CD4_8hr_vs_unstim	up
OCR_126118	chr4	170536998	170537151	4.54499	2.81175	110.156	9.15e-26	5.69e-24	CD4_8hr_vs_unstim	up
OCR_12394	chr1	192952500	192953173	3.55895	3.50741	110.128	9.28e-26	5.77e-24	CD4_8hr_vs_unstim	up
OCR_38059	chr12	56045992	56046679	3.92687	3.141	110.115	9.34e-26	5.8e-24	CD4_8hr_vs_unstim	up
OCR_42363	chr12	92471846	92472250	3.68566	3.09065	110.098	9.42e-26	5.85e-24	CD4_8hr_vs_unstim	up
OCR_9522	chr1	156187757	156188258	3.93442	2.94325	110.039	9.7e-26	6.02e-24	CD4_8hr_vs_unstim	up
OCR_173498	chr9	75091867	75092353	3.86958	3.19226	110.018	9.81e-26	6.08e-24	CD4_8hr_vs_unstim	up
OCR_2419	chr1	41449839	41450012	6.76097	1.98136	110.005	9.87e-26	6.11e-24	CD4_8hr_vs_unstim	up
OCR_115335	chr3	187697273	187697855	-3.21183	2.66465	109.909	1.04e-25	6.41e-24	CD4_8hr_vs_unstim	down
OCR_17540	chr10	11260171	11260829	3.46517	3.68919	109.808	1.09e-25	6.74e-24	CD4_8hr_vs_unstim	up
OCR_26080	chr11	14654993	14655418	-3.51458	2.11137	109.781	1.11e-25	6.83e-24	CD4_8hr_vs_unstim	down
OCR_48593	chr13	80075571	80076379	3.31898	3.59498	109.758	1.12e-25	6.9e-24	CD4_8hr_vs_unstim	up
OCR_110863	chr3	119864418	119865074	3.71066	3.35352	109.751	1.12e-25	6.92e-24	CD4_8hr_vs_unstim	up
OCR_6043	chr1	90012848	90013092	4.54463	2.35635	109.73	1.13e-25	6.99e-24	CD4_8hr_vs_unstim	up
OCR_92798	chr2	206895843	206896417	4.53603	2.8447	109.678	1.16e-25	7.17e-24	CD4_8hr_vs_unstim	up
OCR_120491	chr4	84278134	84279238	4.10031	3.27796	109.497	1.28e-25	7.85e-24	CD4_8hr_vs_unstim	up
OCR_80033	chr2	38880335	38881467	3.04971	4.25132	109.483	1.28e-25	7.9e-24	CD4_8hr_vs_unstim	up
OCR_143515	chr6	75991459	75991662	4.02543	2.98168	109.478	1.29e-25	7.91e-24	CD4_8hr_vs_unstim	up
OCR_160811	chr7	132588884	132589450	6.03459	2.2788	109.448	1.31e-25	8.02e-24	CD4_8hr_vs_unstim	up
OCR_25578	chr11	6672101	6672468	4.05092	2.66005	109.325	1.39e-25	8.52e-24	CD4_8hr_vs_unstim	up
OCR_32350	chr11	118087127	118088614	2.9231	4.37621	109.326	1.39e-25	8.52e-24	CD4_8hr_vs_unstim	up
OCR_101961	chr22	36074907	36075244	5.23228	2.0065	109.32	1.39e-25	8.54e-24	CD4_8hr_vs_unstim	up
OCR_117744	chr4	36082787	36083498	3.67167	3.97349	109.269	1.43e-25	8.75e-24	CD4_8hr_vs_unstim	up
OCR_30684	chr11	95882756	95883782	3.40557	3.59317	109.239	1.45e-25	8.88e-24	CD4_8hr_vs_unstim	up
OCR_41968	chr12	89654949	89655407	4.55141	2.63235	109.227	1.46e-25	8.93e-24	CD4_8hr_vs_unstim	up
OCR_102357	chr22	40302181	40302527	4.1085	2.51768	109.192	1.49e-25	9.08e-24	CD4_8hr_vs_unstim	up
OCR_61132	chr16	27419264	27419719	3.17269	3.84951	109.174	1.5e-25	9.15e-24	CD4_8hr_vs_unstim	up
OCR_69115	chr17	76715791	76716363	3.84109	2.83856	109.161	1.51e-25	9.21e-24	CD4_8hr_vs_unstim	up
OCR_124921	chr4	151951139	151951663	4.66168	2.9227	109.15	1.52e-25	9.25e-24	CD4_8hr_vs_unstim	up
OCR_62560	chr16	69564213	69564984	3.29449	3.58846	109.091	1.57e-25	9.56e-24	CD4_8hr_vs_unstim	up
OCR_104569	chr3	30383324	30384203	4.34473	2.67201	109.083	1.57e-25	9.56e-24	CD4_8hr_vs_unstim	up
OCR_94758	chr2	230918595	230919210	4.84581	2.34657	109.038	1.61e-25	9.77e-24	CD4_8hr_vs_unstim	up
OCR_58568	chr15	72519597	72519850	3.00016	4.17763	109.004	1.64e-25	9.93e-24	CD4_8hr_vs_unstim	up
OCR_101812	chr22	31569345	31570190	4.54184	2.61171	108.957	1.68e-25	1.02e-23	CD4_8hr_vs_unstim	up
OCR_65916	chr17	38698777	38699635	3.27524	3.51805	108.858	1.76e-25	1.07e-23	CD4_8hr_vs_unstim	up
OCR_111005	chr3	122252711	122253352	4.42216	3.20597	108.836	1.78e-25	1.08e-23	CD4_8hr_vs_unstim	up
OCR_140737	chr6	39121425	39122192	3.336	3.6372	108.83	1.79e-25	1.08e-23	CD4_8hr_vs_unstim	up
OCR_58222	chr15	65753050	65753836	4.52084	2.74132	108.828	1.79e-25	1.08e-23	CD4_8hr_vs_unstim	up
OCR_120267	chr4	81092488	81092742	4.0981	2.71741	108.816	1.8e-25	1.09e-23	CD4_8hr_vs_unstim	up
OCR_169053	chr8	116961428	116962627	3.29345	3.75066	108.772	1.84e-25	1.11e-23	CD4_8hr_vs_unstim	up
OCR_84027	chr2	106013239	106013517	4.56708	2.38639	108.748	1.86e-25	1.12e-23	CD4_8hr_vs_unstim	up
OCR_121663	chr4	103456526	103456891	3.58517	3.40705	108.735	1.87e-25	1.13e-23	CD4_8hr_vs_unstim	up
OCR_109925	chr3	108106555	108107768	3.8682	3.72777	108.711	1.9e-25	1.14e-23	CD4_8hr_vs_unstim	up
OCR_122878	chr4	119006983	119007974	3.82255	3.19202	108.593	2.01e-25	1.21e-23	CD4_8hr_vs_unstim	up
OCR_63893	chr17	4476885	4477426	4.24941	2.51711	108.568	2.04e-25	1.23e-23	CD4_8hr_vs_unstim	up
OCR_29241	chr11	69167338	69167944	4.5331	2.42189	108.542	2.07e-25	1.24e-23	CD4_8hr_vs_unstim	up
OCR_148788	chr6	135945234	135946334	2.98032	4.05147	108.525	2.08e-25	1.25e-23	CD4_8hr_vs_unstim	up
OCR_71192	chr18	36331186	36331592	4.18393	2.72646	108.494	2.12e-25	1.27e-23	CD4_8hr_vs_unstim	up
OCR_68783	chr17	73514318	73514675	-3.22513	2.69582	108.484	2.13e-25	1.28e-23	CD4_8hr_vs_unstim	down
OCR_84462	chr2	113861560	113862422	4.09197	2.67353	108.481	2.13e-25	1.28e-23	CD4_8hr_vs_unstim	up
OCR_77062	chr19	47106050	47106541	3.31627	3.37377	108.451	2.16e-25	1.29e-23	CD4_8hr_vs_unstim	up
OCR_51950	chr14	35825091	35826299	3.36463	3.80986	108.435	2.18e-25	1.3e-23	CD4_8hr_vs_unstim	up
OCR_148972	chr6	138149027	138150034	2.93768	4.2586	108.435	2.18e-25	1.3e-23	CD4_8hr_vs_unstim	up
OCR_121517	chr4	100938832	100939580	4.3813	2.82685	108.396	2.22e-25	1.33e-23	CD4_8hr_vs_unstim	up
OCR_37623	chr12	50936150	50936830	3.41517	3.36359	108.36	2.26e-25	1.35e-23	CD4_8hr_vs_unstim	up
OCR_2126	chr1	36770650	36771264	4.25913	2.67488	108.337	2.29e-25	1.37e-23	CD4_8hr_vs_unstim	up
OCR_10675	chr1	172868014	172868378	3.71283	2.83006	108.338	2.29e-25	1.37e-23	CD4_8hr_vs_unstim	up
OCR_78772	chr2	15316874	15317811	2.07969	6.27125	108.297	2.34e-25	1.39e-23	CD4_8hr_vs_unstim	up
OCR_91905	chr2	197099436	197099783	4.01675	2.72218	108.256	2.38e-25	1.42e-23	CD4_8hr_vs_unstim	up
OCR_17366	chr10	8296861	8297179	5.97857	2.34613	108.239	2.41e-25	1.43e-23	CD4_8hr_vs_unstim	up
OCR_45106	chr13	25850761	25851282	3.85264	3.20916	108.212	2.44e-25	1.45e-23	CD4_8hr_vs_unstim	up
OCR_45737	chr13	40676960	40677413	3.2882	3.65409	108.212	2.44e-25	1.45e-23	CD4_8hr_vs_unstim	up
OCR_37569	chr12	50324392	50325183	5.00759	1.91463	108.151	2.52e-25	1.49e-23	CD4_8hr_vs_unstim	up
OCR_42648	chr12	94502709	94503591	3.68202	3.13345	108.094	2.59e-25	1.53e-23	CD4_8hr_vs_unstim	up
OCR_169770	chr8	129252514	129253102	3.97803	3.09295	108.083	2.6e-25	1.54e-23	CD4_8hr_vs_unstim	up
OCR_167240	chr8	90838131	90839080	3.5938	3.44317	108.068	2.63e-25	1.55e-23	CD4_8hr_vs_unstim	up
OCR_149389	chr6	142334331	142334880	4.40516	3.4545	107.936	2.8e-25	1.66e-23	CD4_8hr_vs_unstim	up
OCR_141639	chr6	52855244	52855532	4.79577	2.15406	107.935	2.8e-25	1.66e-23	CD4_8hr_vs_unstim	up
OCR_33908	chr12	9885463	9886200	4.20971	2.83217	107.929	2.82e-25	1.66e-23	CD4_8hr_vs_unstim	up
OCR_64337	chr17	11927726	11927945	4.96624	2.22289	107.921	2.82e-25	1.67e-23	CD4_8hr_vs_unstim	up
OCR_175499	chr9	115990343	115990935	-3.63079	1.95167	107.921	2.83e-25	1.67e-23	CD4_8hr_vs_unstim	down
OCR_17580	chr10	11481980	11483099	3.60467	3.3471	107.873	2.89e-25	1.7e-23	CD4_8hr_vs_unstim	up
OCR_130296	chr5	49995297	49996150	3.54708	3.08964	107.868	2.9e-25	1.71e-23	CD4_8hr_vs_unstim	up
OCR_133485	chr5	100161710	100162303	3.95621	3.0336	107.789	3.02e-25	1.77e-23	CD4_8hr_vs_unstim	up
OCR_46165	chr13	46740090	46740631	3.72925	3.35363	107.738	3.1e-25	1.82e-23	CD4_8hr_vs_unstim	up
OCR_147923	chr6	127804901	127806140	2.2918	5.58976	107.644	3.25e-25	1.91e-23	CD4_8hr_vs_unstim	up
OCR_53853	chr14	65672810	65673846	2.86629	4.48073	107.64	3.25e-25	1.91e-23	CD4_8hr_vs_unstim	up
OCR_158044	chr7	105154914	105155516	4.79639	2.35098	107.633	3.27e-25	1.91e-23	CD4_8hr_vs_unstim	up
OCR_9801	chr1	160443998	160444784	4.62277	2.38929	107.618	3.29e-25	1.93e-23	CD4_8hr_vs_unstim	up
OCR_116612	chr4	15837824	15838398	4.98495	2.30541	107.588	3.34e-25	1.95e-23	CD4_8hr_vs_unstim	up
OCR_173083	chr9	35798712	35799261	4.53759	2.14787	107.585	3.35e-25	1.96e-23	CD4_8hr_vs_unstim	up
OCR_173864	chr9	80362118	80362783	3.45499	3.39459	107.56	3.39e-25	1.98e-23	CD4_8hr_vs_unstim	up
OCR_74524	chr19	6674772	6675484	3.12251	3.79015	107.553	3.4e-25	1.99e-23	CD4_8hr_vs_unstim	up
OCR_132666	chr5	90465827	90466553	4.04041	3.18993	107.547	3.41e-25	1.99e-23	CD4_8hr_vs_unstim	up
OCR_166289	chr8	81234795	81235456	3.96419	3.17901	107.499	3.49e-25	2.04e-23	CD4_8hr_vs_unstim	up
OCR_43788	chr12	111213935	111214136	4.96526	2.25431	107.463	3.56e-25	2.07e-23	CD4_8hr_vs_unstim	up
OCR_19030	chr10	31888874	31889402	3.26676	3.4208	107.445	3.59e-25	2.09e-23	CD4_8hr_vs_unstim	up
OCR_170769	chr9	4667646	4668185	-2.96593	3.22283	107.443	3.59e-25	2.09e-23	CD4_8hr_vs_unstim	down
OCR_88553	chr2	165753193	165754039	3.63483	3.40074	107.425	3.63e-25	2.11e-23	CD4_8hr_vs_unstim	up
OCR_94806	chr2	231501214	231502115	4.39096	2.77826	107.418	3.64e-25	2.11e-23	CD4_8hr_vs_unstim	up
OCR_136968	chr5	158611928	158612405	4.39703	2.66629	107.4	3.67e-25	2.13e-23	CD4_8hr_vs_unstim	up
OCR_63418	chr16	88848804	88849158	3.9212	2.85272	107.386	3.7e-25	2.15e-23	CD4_8hr_vs_unstim	up
OCR_140625	chr6	37291844	37292370	5.22071	1.9119	107.261	3.94e-25	2.28e-23	CD4_8hr_vs_unstim	up
OCR_178189	chrX	46564094	46564877	4.4799	2.73718	107.236	3.99e-25	2.31e-23	CD4_8hr_vs_unstim	up
OCR_146494	chr6	112338209	112338769	4.5159	2.5476	107.208	4.05e-25	2.34e-23	CD4_8hr_vs_unstim	up
OCR_64975	chr17	25793160	25794157	3.01057	4.16619	107.149	4.17e-25	2.41e-23	CD4_8hr_vs_unstim	up
OCR_40242	chr12	76307034	76307967	3.21965	4.02603	107.097	4.28e-25	2.47e-23	CD4_8hr_vs_unstim	up
OCR_5680	chr1	85744633	85744854	3.27536	3.46783	107.085	4.3e-25	2.48e-23	CD4_8hr_vs_unstim	up
OCR_150351	chr6	154926318	154926894	3.44642	3.10114	107.073	4.33e-25	2.5e-23	CD4_8hr_vs_unstim	up
OCR_118010	chr4	40228903	40229345	3.82095	3.02693	107.049	4.39e-25	2.53e-23	CD4_8hr_vs_unstim	up
OCR_83853	chr2	102874674	102875698	3.51626	3.4287	107.044	4.4e-25	2.53e-23	CD4_8hr_vs_unstim	up
OCR_140366	chr6	34212111	34212602	3.44563	3.09308	107.044	4.4e-25	2.53e-23	CD4_8hr_vs_unstim	up
OCR_66070	chr17	40513667	40514233	3.66583	2.79816	107.031	4.43e-25	2.55e-23	CD4_8hr_vs_unstim	up
OCR_100362	chr21	35898623	35899551	3.46471	3.39416	107.019	4.45e-25	2.56e-23	CD4_8hr_vs_unstim	up
OCR_150352	chr6	154927279	154928380	2.75001	4.64078	107.009	4.47e-25	2.57e-23	CD4_8hr_vs_unstim	up
OCR_85398	chr2	131911435	131912124	2.3086	5.62003	106.973	4.56e-25	2.61e-23	CD4_8hr_vs_unstim	up
OCR_106182	chr3	59920254	59921295	3.51204	3.35629	106.942	4.63e-25	2.65e-23	CD4_8hr_vs_unstim	up
OCR_69297	chr17	78830106	78831060	3.41414	3.35733	107.268	4.67e-25	2.68e-23	CD4_8hr_vs_unstim	up
OCR_129848	chr5	40276570	40278005	2.45321	5.2693	106.91	4.7e-25	2.69e-23	CD4_8hr_vs_unstim	up
OCR_84358	chr2	111926001	111926432	3.7564	2.7253	106.903	4.72e-25	2.7e-23	CD4_8hr_vs_unstim	up
OCR_115412	chr3	188668582	188669131	3.60529	3.02662	106.904	4.72e-25	2.7e-23	CD4_8hr_vs_unstim	up
OCR_39266	chr12	67476044	67476638	4.11853	2.50794	106.882	4.77e-25	2.72e-23	CD4_8hr_vs_unstim	up
OCR_117983	chr4	40126269	40126908	-3.00991	3.1008	106.877	4.79e-25	2.73e-23	CD4_8hr_vs_unstim	down
OCR_39326	chr12	68092281	68093372	2.02783	6.31355	106.861	4.82e-25	2.75e-23	CD4_8hr_vs_unstim	up
OCR_121642	chr4	103311433	103312071	3.45094	3.70049	106.861	4.82e-25	2.75e-23	CD4_8hr_vs_unstim	up
OCR_154103	chr7	38478460	38478961	4.50371	2.61741	106.791	4.99e-25	2.84e-23	CD4_8hr_vs_unstim	up
OCR_70972	chr18	32442676	32442930	5.17618	2.47106	106.779	5.02e-25	2.86e-23	CD4_8hr_vs_unstim	up
OCR_17594	chr10	11594008	11594666	3.47151	3.36816	106.709	5.21e-25	2.96e-23	CD4_8hr_vs_unstim	up
OCR_169001	chr8	116433419	116434230	3.80245	3.34035	106.702	5.22e-25	2.97e-23	CD4_8hr_vs_unstim	up
OCR_9370	chr1	154709259	154709953	4.4159	2.35937	106.686	5.27e-25	2.99e-23	CD4_8hr_vs_unstim	up
OCR_105431	chr3	45538962	45539885	-2.81928	3.74763	106.652	5.36e-25	3.04e-23	CD4_8hr_vs_unstim	down
OCR_78519	chr2	12184533	12185394	-2.80477	3.70715	106.646	5.37e-25	3.05e-23	CD4_8hr_vs_unstim	down
OCR_34154	chr12	12619019	12619948	-2.75666	3.94259	106.6	5.5e-25	3.12e-23	CD4_8hr_vs_unstim	down
OCR_163885	chr8	29382400	29382605	5.19593	2.18393	106.582	5.55e-25	3.14e-23	CD4_8hr_vs_unstim	up
OCR_164493	chr8	49861753	49862562	-2.32417	5.25608	106.499	5.79e-25	3.27e-23	CD4_8hr_vs_unstim	down
OCR_1681	chr1	27958768	27959277	3.37013	3.13719	106.46	5.9e-25	3.34e-23	CD4_8hr_vs_unstim	up
OCR_148224	chr6	129816789	129817226	3.73787	3.06382	106.445	5.95e-25	3.36e-23	CD4_8hr_vs_unstim	up
OCR_138789	chr6	13273822	13274978	2.68466	4.59586	106.392	6.11e-25	3.45e-23	CD4_8hr_vs_unstim	up
OCR_109061	chr3	101286304	101287094	3.48932	3.3736	106.381	6.14e-25	3.46e-23	CD4_8hr_vs_unstim	up
OCR_74518	chr19	6654311	6655435	3.19528	3.56917	106.323	6.32e-25	3.56e-23	CD4_8hr_vs_unstim	up
OCR_83050	chr2	84754283	84755331	3.32697	3.53027	106.32	6.33e-25	3.57e-23	CD4_8hr_vs_unstim	up
OCR_81758	chr2	64925744	64926579	3.48744	3.44	106.316	6.34e-25	3.57e-23	CD4_8hr_vs_unstim	up
OCR_169448	chr8	125211954	125212671	3.29413	3.38387	106.302	6.39e-25	3.59e-23	CD4_8hr_vs_unstim	up
OCR_55745	chr14	102188169	102189154	-2.57526	4.53559	106.264	6.51e-25	3.66e-23	CD4_8hr_vs_unstim	down
OCR_160465	chr7	127537588	127538549	4.30165	2.9891	106.261	6.52e-25	3.66e-23	CD4_8hr_vs_unstim	up
OCR_95956	chr20	8136965	8137564	3.17009	3.94704	106.23	6.63e-25	3.72e-23	CD4_8hr_vs_unstim	up
OCR_67520	chr17	57902849	57903294	3.96915	2.88018	106.17	6.83e-25	3.83e-23	CD4_8hr_vs_unstim	up
OCR_13506	chr1	200122283	200122838	2.59725	4.92048	106.139	6.94e-25	3.89e-23	CD4_8hr_vs_unstim	up
OCR_43514	chr12	106697000	106697517	-2.30595	5.22543	106.081	7.14e-25	4e-23	CD4_8hr_vs_unstim	down
OCR_43512	chr12	106682235	106682973	4.4676	2.59106	106.077	7.16e-25	4.01e-23	CD4_8hr_vs_unstim	up
OCR_33077	chr11	129723286	129724473	-2.69996	4.1037	106.057	7.23e-25	4.04e-23	CD4_8hr_vs_unstim	down
OCR_15650	chr1	231525771	231526340	3.9441	2.84057	106.051	7.25e-25	4.05e-23	CD4_8hr_vs_unstim	up
OCR_154305	chr7	43343185	43343852	3.49795	3.5359	106.031	7.33e-25	4.09e-23	CD4_8hr_vs_unstim	up
OCR_97463	chr20	45903217	45903620	4.58922	2.60902	106.004	7.43e-25	4.14e-23	CD4_8hr_vs_unstim	up
OCR_55527	chr14	98643011	98643726	4.0364	2.75846	105.982	7.51e-25	4.19e-23	CD4_8hr_vs_unstim	up
OCR_60473	chr16	11170023	11170670	3.28152	3.29523	105.909	7.8e-25	4.34e-23	CD4_8hr_vs_unstim	up
OCR_43858	chr12	112534018	112535071	4.31284	2.48786	105.882	7.9e-25	4.4e-23	CD4_8hr_vs_unstim	up
OCR_101084	chr21	47970388	47971011	-2.8471	3.49687	105.881	7.9e-25	4.4e-23	CD4_8hr_vs_unstim	down
OCR_94808	chr2	231523513	231524473	2.56956	4.9716	105.85	8.03e-25	4.46e-23	CD4_8hr_vs_unstim	up
OCR_171484	chr9	15121350	15122200	-3.10882	2.89893	105.839	8.07e-25	4.48e-23	CD4_8hr_vs_unstim	down
OCR_862	chr1	16290595	16290877	4.9095	2.37728	105.824	8.13e-25	4.51e-23	CD4_8hr_vs_unstim	up
OCR_2142	chr1	36852029	36852749	2.35969	5.34523	105.814	8.21e-25	4.55e-23	CD4_8hr_vs_unstim	up
OCR_175730	chr9	123671986	123672829	3.20234	3.59976	105.779	8.32e-25	4.61e-23	CD4_8hr_vs_unstim	up
OCR_92871	chr2	207987928	207988589	3.12762	4.16381	105.748	8.45e-25	4.68e-23	CD4_8hr_vs_unstim	up
OCR_61030	chr16	25072067	25072824	-2.90221	3.32155	105.735	8.51e-25	4.71e-23	CD4_8hr_vs_unstim	down
OCR_95011	chr2	234259111	234259887	3.67297	3.0086	105.734	8.51e-25	4.71e-23	CD4_8hr_vs_unstim	up
OCR_116608	chr4	15796484	15797060	4.02252	2.97435	105.643	8.91e-25	4.92e-23	CD4_8hr_vs_unstim	up
OCR_140905	chr6	42307700	42308176	5.50002	2.51887	105.636	8.94e-25	4.94e-23	CD4_8hr_vs_unstim	up
OCR_144593	chr6	90961002	90961904	3.44911	3.56216	105.634	8.95e-25	4.94e-23	CD4_8hr_vs_unstim	up
OCR_136850	chr5	156730481	156731393	-2.8452	3.58115	105.626	8.99e-25	4.95e-23	CD4_8hr_vs_unstim	down
OCR_165476	chr8	68238233	68238863	3.83392	3.26057	105.625	8.99e-25	4.95e-23	CD4_8hr_vs_unstim	up
OCR_129584	chr5	35821629	35822034	3.64847	3.12045	105.62	9.01e-25	4.96e-23	CD4_8hr_vs_unstim	up
OCR_74854	chr19	10983036	10983615	3.39835	3.24436	105.608	9.07e-25	4.99e-23	CD4_8hr_vs_unstim	up
OCR_56485	chr15	33308533	33309251	-3.13746	3.08957	105.571	9.25e-25	5.09e-23	CD4_8hr_vs_unstim	down
OCR_44530	chr12	125246195	125247080	4.3153	2.66157	105.545	9.36e-25	5.14e-23	CD4_8hr_vs_unstim	up
OCR_6044	chr1	90013331	90013657	3.98438	2.78231	105.539	9.39e-25	5.16e-23	CD4_8hr_vs_unstim	up
OCR_936	chr1	17534182	17534956	3.44575	3.24324	105.52	9.48e-25	5.2e-23	CD4_8hr_vs_unstim	up
OCR_97396	chr20	44513563	44514058	3.61283	3.12067	105.522	9.47e-25	5.2e-23	CD4_8hr_vs_unstim	up
OCR_17799	chr10	14647156	14647666	3.0768	3.82416	105.498	9.59e-25	5.26e-23	CD4_8hr_vs_unstim	up
OCR_104997	chr3	37216184	37216598	3.08346	3.93748	105.47	9.72e-25	5.32e-23	CD4_8hr_vs_unstim	up
OCR_158655	chr7	111138970	111139681	3.47112	3.31554	105.382	1.02e-24	5.56e-23	CD4_8hr_vs_unstim	up
OCR_95584	chr20	1640827	1641267	3.32954	3.23188	105.366	1.03e-24	5.6e-23	CD4_8hr_vs_unstim	up
OCR_18996	chr10	31610293	31611065	-2.58893	4.40222	105.303	1.06e-24	5.78e-23	CD4_8hr_vs_unstim	down
OCR_1085	chr1	20685850	20686577	4.78619	2.27897	105.276	1.07e-24	5.85e-23	CD4_8hr_vs_unstim	up
OCR_138824	chr6	13630479	13631283	4.92778	2.43983	105.257	1.08e-24	5.91e-23	CD4_8hr_vs_unstim	up
OCR_103827	chr3	16838099	16838881	3.60524	3.02009	105.197	1.12e-24	6.08e-23	CD4_8hr_vs_unstim	up
OCR_155755	chr7	79707337	79708459	2.73441	4.47243	105.193	1.12e-24	6.09e-23	CD4_8hr_vs_unstim	up
OCR_60969	chr16	23963190	23964015	2.91082	3.98529	105.184	1.12e-24	6.12e-23	CD4_8hr_vs_unstim	up
OCR_163521	chr8	22499975	22500973	-2.9395	3.16	105.181	1.12e-24	6.12e-23	CD4_8hr_vs_unstim	down
OCR_42364	chr12	92472305	92472554	4.94715	2.28145	105.167	1.13e-24	6.16e-23	CD4_8hr_vs_unstim	up
OCR_139789	chr6	28237292	28237618	4.92735	1.95375	105.152	1.14e-24	6.2e-23	CD4_8hr_vs_unstim	up
OCR_15433	chr1	227961672	227962401	-3.34987	2.32574	105.124	1.16e-24	6.28e-23	CD4_8hr_vs_unstim	down
OCR_33678	chr12	6895623	6896325	-2.71747	3.96825	105.125	1.16e-24	6.28e-23	CD4_8hr_vs_unstim	down
OCR_104012	chr3	18780536	18780902	3.64315	3.06388	105.096	1.17e-24	6.36e-23	CD4_8hr_vs_unstim	up
OCR_100053	chr21	30704854	30705503	4.26154	2.73361	105.05	1.2e-24	6.51e-23	CD4_8hr_vs_unstim	up
OCR_129586	chr5	35822526	35823062	-2.91154	3.36062	105.04	1.21e-24	6.54e-23	CD4_8hr_vs_unstim	down
OCR_175448	chr9	115011462	115012003	4.71236	2.79944	105.036	1.21e-24	6.55e-23	CD4_8hr_vs_unstim	up
OCR_146039	chr6	106600159	106600854	4.89712	2.18548	104.972	1.25e-24	6.76e-23	CD4_8hr_vs_unstim	up
OCR_90895	chr2	190150719	190151429	3.66115	3.20863	104.96	1.26e-24	6.79e-23	CD4_8hr_vs_unstim	up
OCR_148252	chr6	129994550	129994803	3.29017	3.27255	104.93	1.28e-24	6.89e-23	CD4_8hr_vs_unstim	up
OCR_30501	chr11	93471395	93471693	3.24571	3.64771	104.862	1.32e-24	7.13e-23	CD4_8hr_vs_unstim	up
OCR_150701	chr6	159107629	159108522	-2.80918	3.70035	104.844	1.33e-24	7.19e-23	CD4_8hr_vs_unstim	down
OCR_50983	chr13	114913785	114914461	-2.63234	4.28775	104.798	1.37e-24	7.35e-23	CD4_8hr_vs_unstim	down
OCR_65125	chr17	27590771	27591314	4.97602	2.05131	104.777	1.38e-24	7.43e-23	CD4_8hr_vs_unstim	up
OCR_122432	chr4	114461776	114462487	4.37307	2.98814	104.749	1.4e-24	7.52e-23	CD4_8hr_vs_unstim	up
OCR_94286	chr2	224679493	224680465	4.1906	2.74648	104.731	1.41e-24	7.59e-23	CD4_8hr_vs_unstim	up
OCR_115661	chr3	192568063	192569015	3.71052	3.15532	104.703	1.43e-24	7.69e-23	CD4_8hr_vs_unstim	up
OCR_44759	chr12	132903975	132904772	3.18954	3.49015	104.615	1.5e-24	8.04e-23	CD4_8hr_vs_unstim	up
OCR_68086	chr17	65192809	65193517	4.02772	2.41799	104.592	1.51e-24	8.12e-23	CD4_8hr_vs_unstim	up
OCR_25312	chr11	2164086	2164510	4.25055	2.58719	104.559	1.54e-24	8.25e-23	CD4_8hr_vs_unstim	up
OCR_45357	chr13	30733409	30734027	4.599	2.55076	104.555	1.54e-24	8.27e-23	CD4_8hr_vs_unstim	up
OCR_6002	chr1	89739779	89740602	2.79537	4.36637	104.515	1.57e-24	8.43e-23	CD4_8hr_vs_unstim	up
OCR_134180	chr5	106822005	106822740	3.22503	4.14123	104.508	1.58e-24	8.45e-23	CD4_8hr_vs_unstim	up
OCR_50493	chr13	103248449	103248925	-2.02511	6.09928	104.473	1.61e-24	8.59e-23	CD4_8hr_vs_unstim	down
OCR_56786	chr15	39543506	39544355	4.02908	3.02709	104.437	1.64e-24	8.75e-23	CD4_8hr_vs_unstim	up
OCR_37654	chr12	51418307	51419302	2.54599	4.81396	104.423	1.65e-24	8.8e-23	CD4_8hr_vs_unstim	up
OCR_49804	chr13	91983264	91984232	3.61131	3.69575	104.413	1.66e-24	8.83e-23	CD4_8hr_vs_unstim	up
OCR_65972	chr17	39464378	39465663	-2.13252	5.66871	104.413	1.66e-24	8.83e-23	CD4_8hr_vs_unstim	down
OCR_75681	chr19	19893634	19894008	5.4439	2.25536	104.403	1.67e-24	8.87e-23	CD4_8hr_vs_unstim	up
OCR_136253	chr5	143057682	143058651	5.12175	2.68276	104.377	1.69e-24	8.98e-23	CD4_8hr_vs_unstim	up
OCR_2348	chr1	40651742	40652718	3.50269	2.92982	104.368	1.7e-24	9.02e-23	CD4_8hr_vs_unstim	up
OCR_160583	chr7	129170625	129171254	3.88259	2.88984	104.369	1.7e-24	9.02e-23	CD4_8hr_vs_unstim	up
OCR_169614	chr8	127860687	127861232	4.74705	2.489	104.365	1.7e-24	9.02e-23	CD4_8hr_vs_unstim	up
OCR_22801	chr10	90667553	90668578	3.16284	3.67258	104.359	1.7e-24	9.04e-23	CD4_8hr_vs_unstim	up
OCR_144331	chr6	87907101	87907907	3.79357	3.45852	104.338	1.72e-24	9.13e-23	CD4_8hr_vs_unstim	up
OCR_57440	chr15	52850368	52850880	3.83679	3.23347	104.314	1.74e-24	9.24e-23	CD4_8hr_vs_unstim	up
OCR_16541	chr1	244598873	244599533	4.20515	2.80232	104.299	1.76e-24	9.3e-23	CD4_8hr_vs_unstim	up
OCR_105210	chr3	42138540	42139090	4.15444	2.54497	104.252	1.8e-24	9.51e-23	CD4_8hr_vs_unstim	up
OCR_115100	chr3	184043405	184043973	3.79948	2.65584	104.243	1.81e-24	9.55e-23	CD4_8hr_vs_unstim	up
OCR_120305	chr4	81461544	81462635	2.81447	4.47253	104.183	1.87e-24	9.86e-23	CD4_8hr_vs_unstim	up
OCR_136823	chr5	156652591	156653139	3.74713	3.16659	104.136	1.91e-24	1.01e-22	CD4_8hr_vs_unstim	up
OCR_56508	chr15	33493684	33494481	2.58162	4.87733	104.114	1.93e-24	1.02e-22	CD4_8hr_vs_unstim	up
OCR_74568	chr19	7186100	7186838	5.12901	2.01284	104.084	1.96e-24	1.03e-22	CD4_8hr_vs_unstim	up
OCR_34361	chr12	15063052	15064031	3.41104	3.53596	104.043	2e-24	1.05e-22	CD4_8hr_vs_unstim	up
OCR_121441	chr4	99715269	99716402	3.54252	3.27154	104.061	2e-24	1.05e-22	CD4_8hr_vs_unstim	up
OCR_129883	chr5	40490524	40491186	4.07627	3.18206	103.978	2.06e-24	1.09e-22	CD4_8hr_vs_unstim	up
OCR_136100	chr5	141353473	141354128	3.73352	3.05472	103.964	2.08e-24	1.09e-22	CD4_8hr_vs_unstim	up
OCR_167750	chr8	100667663	100669124	3.37128	3.64935	103.956	2.09e-24	1.1e-22	CD4_8hr_vs_unstim	up
OCR_159055	chr7	114570904	114571696	2.33979	5.36564	103.947	2.1e-24	1.1e-22	CD4_8hr_vs_unstim	up
OCR_54269	chr14	71684952	71685578	4.73174	2.34836	103.911	2.14e-24	1.12e-22	CD4_8hr_vs_unstim	up
OCR_90503	chr2	187504463	187505188	4.21722	3.98948	103.883	2.17e-24	1.14e-22	CD4_8hr_vs_unstim	up
OCR_2518	chr1	42401498	42402295	4.72033	2.14082	103.911	2.18e-24	1.14e-22	CD4_8hr_vs_unstim	up
OCR_106614	chr3	71238616	71239048	4.02423	2.69679	103.871	2.18e-24	1.14e-22	CD4_8hr_vs_unstim	up
OCR_176513	chr9	136542092	136542850	-2.77461	3.78651	103.785	2.28e-24	1.19e-22	CD4_8hr_vs_unstim	down
OCR_131378	chr5	67639269	67639746	4.32425	2.46409	103.78	2.28e-24	1.19e-22	CD4_8hr_vs_unstim	up
OCR_67696	chr17	60801706	60802793	2.14527	5.80932	103.767	2.3e-24	1.2e-22	CD4_8hr_vs_unstim	up
OCR_177486	chrX	20533868	20534719	3.66434	3.1763	103.767	2.3e-24	1.2e-22	CD4_8hr_vs_unstim	up
OCR_67948	chr17	63652768	63653425	3.51991	3.45454	103.76	2.3e-24	1.2e-22	CD4_8hr_vs_unstim	up
OCR_122199	chr4	110592396	110593140	5.44649	2.62753	103.758	2.31e-24	1.2e-22	CD4_8hr_vs_unstim	up
OCR_139082	chr6	16685214	16685856	3.51595	3.22379	103.747	2.32e-24	1.21e-22	CD4_8hr_vs_unstim	up
OCR_92124	chr2	198817257	198817933	3.65195	2.89318	103.69	2.39e-24	1.24e-22	CD4_8hr_vs_unstim	up
OCR_18790	chr10	28506656	28507545	2.92022	4.20212	103.683	2.4e-24	1.25e-22	CD4_8hr_vs_unstim	up
OCR_160884	chr7	134352556	134353104	3.42345	3.51706	103.672	2.41e-24	1.25e-22	CD4_8hr_vs_unstim	up
OCR_42041	chr12	90149973	90151040	2.70148	4.57399	103.645	2.44e-24	1.27e-22	CD4_8hr_vs_unstim	up
OCR_58569	chr15	72520589	72521320	2.52757	4.92888	103.623	2.47e-24	1.28e-22	CD4_8hr_vs_unstim	up
OCR_9029	chr1	149979220	149979441	5.87097	1.76381	103.573	2.53e-24	1.31e-22	CD4_8hr_vs_unstim	up
OCR_58792	chr15	76349242	76350099	3.32273	3.19996	103.536	2.58e-24	1.34e-22	CD4_8hr_vs_unstim	up
OCR_70235	chr18	20921251	20921876	4.9684	2.33043	103.531	2.59e-24	1.34e-22	CD4_8hr_vs_unstim	up
OCR_51379	chr14	24522217	24522967	3.57484	3.1407	103.475	2.66e-24	1.38e-22	CD4_8hr_vs_unstim	up
OCR_44344	chr12	122593053	122593683	3.37213	3.3133	103.449	2.7e-24	1.39e-22	CD4_8hr_vs_unstim	up
OCR_67422	chr17	56405410	56407853	1.80306	7.23515	103.449	2.7e-24	1.39e-22	CD4_8hr_vs_unstim	up
OCR_83326	chr2	89035325	89035879	4.47926	2.26426	103.448	2.7e-24	1.39e-22	CD4_8hr_vs_unstim	up
OCR_89707	chr2	180828038	180828913	5.16239	2.35801	103.441	2.71e-24	1.4e-22	CD4_8hr_vs_unstim	up
OCR_140893	chr6	42192154	42192578	4.72729	2.23968	103.433	2.72e-24	1.4e-22	CD4_8hr_vs_unstim	up
OCR_91074	chr2	191674261	191675065	3.94528	2.77544	103.426	2.73e-24	1.41e-22	CD4_8hr_vs_unstim	up
OCR_110285	chr3	112151957	112152475	4.23351	2.62327	103.419	2.74e-24	1.41e-22	CD4_8hr_vs_unstim	up
OCR_149998	chr6	149701663	149702268	4.46913	2.32595	103.389	2.78e-24	1.43e-22	CD4_8hr_vs_unstim	up
OCR_105361	chr3	44146235	44147019	3.88689	3.12597	103.352	2.83e-24	1.46e-22	CD4_8hr_vs_unstim	up
OCR_66377	chr17	44234123	44234711	3.3606	3.34048	103.27	2.95e-24	1.52e-22	CD4_8hr_vs_unstim	up
OCR_19290	chr10	35644841	35645321	3.10346	4.11977	103.24	3e-24	1.54e-22	CD4_8hr_vs_unstim	up
OCR_169699	chr8	128843550	128844262	3.41155	3.25284	103.231	3.01e-24	1.55e-22	CD4_8hr_vs_unstim	up
OCR_32478	chr11	119088995	119089559	4.25037	2.47543	103.214	3.04e-24	1.56e-22	CD4_8hr_vs_unstim	up
OCR_22778	chr10	90553499	90554069	3.30813	3.34976	103.189	3.07e-24	1.58e-22	CD4_8hr_vs_unstim	up
OCR_48570	chr13	79960331	79961194	2.91202	4.13923	103.187	3.08e-24	1.58e-22	CD4_8hr_vs_unstim	up
OCR_102490	chr22	41107367	41108329	3.03898	3.65725	103.188	3.08e-24	1.58e-22	CD4_8hr_vs_unstim	up
OCR_81371	chr2	58373726	58374427	4.06846	2.5173	103.181	3.09e-24	1.58e-22	CD4_8hr_vs_unstim	up
OCR_112573	chr3	150478446	150478798	2.73983	4.56928	103.119	3.18e-24	1.63e-22	CD4_8hr_vs_unstim	up
OCR_16613	chr1	246493086	246493693	4.2996	3.49871	103.111	3.2e-24	1.64e-22	CD4_8hr_vs_unstim	up
OCR_120472	chr4	84133089	84134033	-2.28813	5.1773	103.07	3.26e-24	1.67e-22	CD4_8hr_vs_unstim	down
OCR_101109	chr22	17430134	17430904	4.44118	2.89092	103.02	3.35e-24	1.71e-22	CD4_8hr_vs_unstim	up
OCR_135159	chr5	122795671	122796930	2.63545	4.82727	103.021	3.35e-24	1.71e-22	CD4_8hr_vs_unstim	up
OCR_9826	chr1	160597509	160597860	5.39117	2.04882	103.015	3.36e-24	1.71e-22	CD4_8hr_vs_unstim	up
OCR_15965	chr1	236116098	236116733	3.63644	3.24488	102.983	3.41e-24	1.74e-22	CD4_8hr_vs_unstim	up
OCR_9152	chr1	151467132	151467794	4.8927	2.11642	102.977	3.42e-24	1.74e-22	CD4_8hr_vs_unstim	up
OCR_92584	chr2	204594432	204595392	3.19567	3.47375	102.966	3.44e-24	1.75e-22	CD4_8hr_vs_unstim	up
OCR_56442	chr15	31751123	31752017	3.29421	3.62094	102.958	3.45e-24	1.76e-22	CD4_8hr_vs_unstim	up
OCR_70987	chr18	32573135	32574129	3.60326	3.25599	102.95	3.47e-24	1.76e-22	CD4_8hr_vs_unstim	up
OCR_135653	chr5	132505977	132507030	-2.72709	3.81457	102.944	3.48e-24	1.77e-22	CD4_8hr_vs_unstim	down
OCR_81689	chr2	64360973	64361635	3.86928	2.63038	102.869	3.61e-24	1.83e-22	CD4_8hr_vs_unstim	up
OCR_65265	chr17	29439239	29439691	5.44248	1.7796	102.858	3.63e-24	1.84e-22	CD4_8hr_vs_unstim	up
OCR_55459	chr14	98068588	98069926	-2.40896	4.84139	102.851	3.65e-24	1.85e-22	CD4_8hr_vs_unstim	down
OCR_75237	chr19	15241122	15241408	3.30015	2.99637	102.844	3.66e-24	1.85e-22	CD4_8hr_vs_unstim	up
OCR_110871	chr3	120042361	120043024	3.96212	2.64436	102.821	3.7e-24	1.87e-22	CD4_8hr_vs_unstim	up
OCR_121622	chr4	102928968	102929676	3.43632	3.94514	102.786	3.77e-24	1.91e-22	CD4_8hr_vs_unstim	up
OCR_59926	chr15	101746044	101746993	2.4138	5.14827	102.738	3.9e-24	1.97e-22	CD4_8hr_vs_unstim	up
OCR_81753	chr2	64902978	64903692	3.00527	3.82178	102.702	3.93e-24	1.99e-22	CD4_8hr_vs_unstim	up
OCR_165062	chr8	61534672	61535195	4.11334	3.38414	102.702	3.94e-24	1.99e-22	CD4_8hr_vs_unstim	up
OCR_148643	chr6	134556984	134557913	3.06029	3.81366	102.704	3.94e-24	1.99e-22	CD4_8hr_vs_unstim	up
OCR_42132	chr12	90673589	90674179	3.62914	3.67819	102.695	3.94e-24	1.99e-22	CD4_8hr_vs_unstim	up
OCR_7129	chr1	101836613	101837330	3.65687	3.37894	102.688	3.96e-24	2e-22	CD4_8hr_vs_unstim	up
OCR_70314	chr18	21643111	21643797	3.73518	2.90822	102.681	3.97e-24	2e-22	CD4_8hr_vs_unstim	up
OCR_177283	chrX	16873910	16874704	3.60718	3.05254	102.657	4.02e-24	2.02e-22	CD4_8hr_vs_unstim	up
OCR_79859	chr2	36504309	36504961	4.92082	2.21381	102.611	4.11e-24	2.07e-22	CD4_8hr_vs_unstim	up
OCR_124594	chr4	143745513	143745966	4.44538	2.92497	102.605	4.13e-24	2.08e-22	CD4_8hr_vs_unstim	up
OCR_13220	chr1	198138845	198139179	3.06121	3.59748	102.598	4.14e-24	2.08e-22	CD4_8hr_vs_unstim	up
OCR_39387	chr12	68636707	68637021	5.08295	2.10503	102.539	4.27e-24	2.14e-22	CD4_8hr_vs_unstim	up
OCR_129677	chr5	36928850	36929677	3.55468	2.96927	102.5	4.35e-24	2.18e-22	CD4_8hr_vs_unstim	up
OCR_99615	chr21	25405023	25405999	4.28903	3.20248	102.454	4.45e-24	2.23e-22	CD4_8hr_vs_unstim	up
OCR_18465	chr10	23826100	23826605	4.02729	2.97369	102.27	4.89e-24	2.45e-22	CD4_8hr_vs_unstim	up
OCR_68573	chr17	70988950	70989655	4.85203	2.76793	102.253	4.93e-24	2.47e-22	CD4_8hr_vs_unstim	up
OCR_9824	chr1	160595944	160596217	3.88419	2.61202	102.249	4.94e-24	2.47e-22	CD4_8hr_vs_unstim	up
OCR_154424	chr7	44656748	44657627	3.90645	3.19427	102.216	5.02e-24	2.51e-22	CD4_8hr_vs_unstim	up
OCR_169413	chr8	124532470	124533032	-2.82255	3.50602	102.212	5.03e-24	2.52e-22	CD4_8hr_vs_unstim	down
OCR_61219	chr16	29031987	29032515	3.53834	2.91524	102.199	5.07e-24	2.53e-22	CD4_8hr_vs_unstim	up
OCR_17597	chr10	11620478	11621456	3.59738	3.02145	102.194	5.08e-24	2.53e-22	CD4_8hr_vs_unstim	up
OCR_154661	chr7	50331752	50332360	5.08374	2.57808	102.194	5.08e-24	2.53e-22	CD4_8hr_vs_unstim	up
OCR_24272	chr10	115601629	115602409	5.09128	2.6055	102.157	5.17e-24	2.58e-22	CD4_8hr_vs_unstim	up
OCR_125346	chr4	160127460	160128148	2.87049	4.65148	102.122	5.27e-24	2.62e-22	CD4_8hr_vs_unstim	up
OCR_18648	chr10	26731316	26731575	3.45904	2.99441	102.113	5.29e-24	2.63e-22	CD4_8hr_vs_unstim	up
OCR_65508	chr17	33572227	33572452	4.04911	2.5901	102.081	5.38e-24	2.68e-22	CD4_8hr_vs_unstim	up
OCR_78804	chr2	16108269	16109052	3.09237	4.10427	102.048	5.47e-24	2.72e-22	CD4_8hr_vs_unstim	up
OCR_125336	chr4	160028762	160029124	3.80329	3.10889	102.036	5.5e-24	2.73e-22	CD4_8hr_vs_unstim	up
OCR_56179	chr15	23092376	23092895	5.92129	2.14498	101.985	5.64e-24	2.8e-22	CD4_8hr_vs_unstim	up
OCR_64689	chr17	17599457	17599780	5.86597	1.83087	101.974	5.67e-24	2.82e-22	CD4_8hr_vs_unstim	up
OCR_92660	chr2	204869682	204870448	3.231	3.49754	101.964	5.7e-24	2.83e-22	CD4_8hr_vs_unstim	up
OCR_145206	chr6	96947409	96948328	-2.99495	2.8573	101.948	5.75e-24	2.85e-22	CD4_8hr_vs_unstim	down
OCR_104039	chr3	18912179	18912487	4.33417	2.54619	101.941	5.77e-24	2.86e-22	CD4_8hr_vs_unstim	up
OCR_6121	chr1	90336214	90336938	-3.08845	2.68953	101.937	5.78e-24	2.86e-22	CD4_8hr_vs_unstim	down
OCR_25853	chr11	11171113	11172315	-2.06986	5.81852	101.928	5.81e-24	2.87e-22	CD4_8hr_vs_unstim	down
OCR_31879	chr11	108070462	108071288	3.21177	3.72228	101.915	5.85e-24	2.89e-22	CD4_8hr_vs_unstim	up
OCR_10731	chr1	173830056	173832345	2.89218	4.32485	101.907	5.87e-24	2.9e-22	CD4_8hr_vs_unstim	up
OCR_97091	chr20	37393590	37394112	4.42098	2.49128	101.896	5.9e-24	2.91e-22	CD4_8hr_vs_unstim	up
OCR_112766	chr3	152274463	152275805	3.71561	3.11703	101.868	5.99e-24	2.95e-22	CD4_8hr_vs_unstim	up
OCR_110997	chr3	122216167	122216667	3.52635	3.22967	101.847	6.07e-24	2.99e-22	CD4_8hr_vs_unstim	up
OCR_145469	chr6	101149296	101150354	4.02924	3.66419	101.788	6.23e-24	3.07e-22	CD4_8hr_vs_unstim	up
OCR_79414	chr2	28668538	28669122	4.19674	2.48124	101.782	6.28e-24	3.1e-22	CD4_8hr_vs_unstim	up
OCR_137865	chr5	178569483	178570267	4.10832	2.86797	101.716	6.46e-24	3.18e-22	CD4_8hr_vs_unstim	up
OCR_158207	chr7	107299954	107300500	3.37365	3.78292	101.697	6.52e-24	3.21e-22	CD4_8hr_vs_unstim	up
OCR_1309	chr1	24518413	24518752	3.92409	2.5223	101.635	6.73e-24	3.31e-22	CD4_8hr_vs_unstim	up
OCR_148307	chr6	130453157	130454017	-2.31308	5.05872	101.609	6.82e-24	3.35e-22	CD4_8hr_vs_unstim	down
OCR_38006	chr12	55327198	55327606	3.16377	3.35089	101.591	6.88e-24	3.38e-22	CD4_8hr_vs_unstim	up
OCR_22799	chr10	90656878	90657617	2.90419	3.88422	101.586	6.9e-24	3.39e-22	CD4_8hr_vs_unstim	up
OCR_67526	chr17	57923014	57923478	3.31258	3.16105	101.504	7.19e-24	3.53e-22	CD4_8hr_vs_unstim	up
OCR_160669	chr7	130594663	130594978	3.708	2.74957	101.467	7.33e-24	3.59e-22	CD4_8hr_vs_unstim	up
OCR_172932	chr9	33415163	33416085	-2.29822	5.11065	101.436	7.44e-24	3.65e-22	CD4_8hr_vs_unstim	down
OCR_61258	chr16	29743239	29744068	3.65366	3.19596	101.404	7.58e-24	3.71e-22	CD4_8hr_vs_unstim	up
OCR_101292	chr22	20828916	20829663	3.71662	2.82056	101.309	7.94e-24	3.88e-22	CD4_8hr_vs_unstim	up
OCR_52078	chr14	38576231	38577162	3.59602	3.67321	101.305	7.96e-24	3.89e-22	CD4_8hr_vs_unstim	up
OCR_18524	chr10	24911583	24912290	-2.57237	4.27587	101.278	8.06e-24	3.94e-22	CD4_8hr_vs_unstim	down
OCR_11423	chr1	186259163	186259650	3.63582	3.2924	101.263	8.13e-24	3.97e-22	CD4_8hr_vs_unstim	up
OCR_157208	chr7	92264194	92264511	3.37456	3.43979	101.259	8.14e-24	3.97e-22	CD4_8hr_vs_unstim	up
OCR_23038	chr10	93970675	93971665	3.41113	3.13092	101.254	8.16e-24	3.98e-22	CD4_8hr_vs_unstim	up
OCR_55136	chr14	91694407	91695550	2.39796	5.12246	101.237	8.23e-24	4.01e-22	CD4_8hr_vs_unstim	up
OCR_122019	chr4	108952648	108953008	3.48501	3.14209	101.214	8.33e-24	4.05e-22	CD4_8hr_vs_unstim	up
OCR_144619	chr6	91115860	91116173	3.98117	2.7743	101.178	8.49e-24	4.13e-22	CD4_8hr_vs_unstim	up
OCR_110251	chr3	111816228	111816783	3.80313	2.84936	101.17	8.52e-24	4.14e-22	CD4_8hr_vs_unstim	up
OCR_177183	chrX	14046611	14046963	3.72609	3.05717	101.152	8.59e-24	4.17e-22	CD4_8hr_vs_unstim	up
OCR_17125	chr10	6112621	6113044	3.6504	2.8653	101.144	8.65e-24	4.2e-22	CD4_8hr_vs_unstim	up
OCR_76591	chr19	41626599	41627428	-2.88975	3.11778	101.104	8.8e-24	4.27e-22	CD4_8hr_vs_unstim	down
OCR_136864	chr5	156891523	156891796	4.13024	2.83291	101.07	8.96e-24	4.34e-22	CD4_8hr_vs_unstim	up
OCR_120461	chr4	84004348	84005672	-2.5529	4.39489	101.001	9.27e-24	4.5e-22	CD4_8hr_vs_unstim	down
OCR_174841	chr9	102588978	102589227	3.9655	2.6241	100.98	9.37e-24	4.54e-22	CD4_8hr_vs_unstim	up
OCR_53955	chr14	67931004	67931609	-2.94116	3.10209	100.977	9.39e-24	4.54e-22	CD4_8hr_vs_unstim	down
OCR_110042	chr3	109523551	109524040	3.01259	3.93018	100.909	9.71e-24	4.7e-22	CD4_8hr_vs_unstim	up
OCR_403	chr1	8555918	8556580	3.57364	2.89373	100.903	9.78e-24	4.73e-22	CD4_8hr_vs_unstim	up
OCR_134336	chr5	109424372	109424968	3.399	3.28948	100.857	9.97e-24	4.82e-22	CD4_8hr_vs_unstim	up
OCR_106365	chr3	66522708	66523630	3.03155	4.09417	100.845	1e-23	4.84e-22	CD4_8hr_vs_unstim	up
OCR_165036	chr8	61150661	61151518	3.04923	3.98283	100.844	1e-23	4.84e-22	CD4_8hr_vs_unstim	up
OCR_178869	chrX	74379332	74379727	5.10659	2.42273	100.817	1.02e-23	4.91e-22	CD4_8hr_vs_unstim	up
OCR_146041	chr6	106611807	106612875	2.85384	4.18388	100.842	1.02e-23	4.93e-22	CD4_8hr_vs_unstim	up
OCR_164213	chr8	38794048	38796526	-2.232	5.25973	100.756	1.05e-23	5.05e-22	CD4_8hr_vs_unstim	down
OCR_44378	chr12	123210446	123211093	3.96139	2.47866	100.731	1.06e-23	5.11e-22	CD4_8hr_vs_unstim	up
OCR_2181	chr1	38155397	38155827	3.19383	3.22503	100.693	1.08e-23	5.21e-22	CD4_8hr_vs_unstim	up
OCR_45791	chr13	41091643	41092365	3.57134	3.55184	100.689	1.09e-23	5.22e-22	CD4_8hr_vs_unstim	up
OCR_46353	chr13	49715117	49716038	3.68806	3.0102	100.688	1.09e-23	5.22e-22	CD4_8hr_vs_unstim	up
OCR_37336	chr12	47794994	47795459	3.86069	2.68976	100.634	1.12e-23	5.36e-22	CD4_8hr_vs_unstim	up
OCR_139930	chr6	30290299	30290566	4.37731	2.057	100.623	1.12e-23	5.38e-22	CD4_8hr_vs_unstim	up
OCR_73166	chr18	67612458	67612838	3.34891	3.39556	100.603	1.13e-23	5.44e-22	CD4_8hr_vs_unstim	up
OCR_108838	chr3	98275020	98275669	2.74066	4.70254	100.586	1.14e-23	5.48e-22	CD4_8hr_vs_unstim	up
OCR_61855	chr16	56648567	56648882	5.38181	2.05155	100.594	1.14e-23	5.48e-22	CD4_8hr_vs_unstim	up
OCR_58768	chr15	75913260	75913820	4.40211	2.31748	100.561	1.16e-23	5.54e-22	CD4_8hr_vs_unstim	up
OCR_119983	chr4	75173723	75174465	-2.85481	3.36004	100.56	1.16e-23	5.54e-22	CD4_8hr_vs_unstim	down
OCR_83515	chr2	98279219	98279714	2.6343	4.5814	100.546	1.17e-23	5.58e-22	CD4_8hr_vs_unstim	up
OCR_66056	chr17	40462830	40463376	3.09387	3.64157	100.531	1.18e-23	5.62e-22	CD4_8hr_vs_unstim	up
OCR_13541	chr1	200452645	200453186	3.64112	3.07138	100.49	1.2e-23	5.73e-22	CD4_8hr_vs_unstim	up
OCR_139430	chr6	24788176	24788873	4.65854	2.49962	100.455	1.22e-23	5.83e-22	CD4_8hr_vs_unstim	up
OCR_150390	chr6	155492184	155493065	2.38368	5.15628	100.448	1.23e-23	5.84e-22	CD4_8hr_vs_unstim	up
OCR_1379	chr1	25281149	25282164	3.02227	3.7273	100.402	1.25e-23	5.98e-22	CD4_8hr_vs_unstim	up
OCR_76657	chr19	42244330	42245097	4.32961	2.43858	100.37	1.27e-23	6.07e-22	CD4_8hr_vs_unstim	up
OCR_170971	chr9	6931552	6932298	3.87498	3.31356	100.353	1.29e-23	6.13e-22	CD4_8hr_vs_unstim	up
OCR_16947	chr10	3800211	3800886	3.4086	3.40631	100.343	1.29e-23	6.15e-22	CD4_8hr_vs_unstim	up
OCR_33256	chr12	825619	826248	3.95625	2.47708	100.341	1.29e-23	6.15e-22	CD4_8hr_vs_unstim	up
OCR_36771	chr12	42693163	42694425	3.65403	3.46219	100.304	1.32e-23	6.26e-22	CD4_8hr_vs_unstim	up
OCR_61055	chr16	26609215	26610001	3.29829	3.65877	100.304	1.32e-23	6.26e-22	CD4_8hr_vs_unstim	up
OCR_177600	chrX	24098301	24099523	3.81475	3.23379	100.289	1.33e-23	6.3e-22	CD4_8hr_vs_unstim	up
OCR_17905	chr10	16821308	16821984	2.68041	4.61	100.239	1.36e-23	6.46e-22	CD4_8hr_vs_unstim	up
OCR_133002	chr5	94577386	94577871	4.54724	2.53438	100.235	1.36e-23	6.47e-22	CD4_8hr_vs_unstim	up
OCR_105333	chr3	43539322	43539975	3.86765	2.57048	100.232	1.37e-23	6.48e-22	CD4_8hr_vs_unstim	up
OCR_159052	chr7	114556038	114557196	2.28506	5.38523	100.209	1.38e-23	6.54e-22	CD4_8hr_vs_unstim	up
OCR_150064	chr6	150322393	150323032	3.26568	3.65081	100.204	1.39e-23	6.56e-22	CD4_8hr_vs_unstim	up
OCR_105773	chr3	50692318	50693142	3.73585	2.77235	100.187	1.4e-23	6.61e-22	CD4_8hr_vs_unstim	up
OCR_62486	chr16	68304268	68304677	3.57548	2.61685	100.183	1.4e-23	6.62e-22	CD4_8hr_vs_unstim	up
OCR_130473	chr5	52283517	52284056	3.86218	2.70891	100.158	1.42e-23	6.7e-22	CD4_8hr_vs_unstim	up
OCR_97484	chr20	46086179	46086655	4.66623	2.61461	100.155	1.42e-23	6.71e-22	CD4_8hr_vs_unstim	up
OCR_61066	chr16	26682987	26684307	3.77674	2.96226	100.15	1.42e-23	6.72e-22	CD4_8hr_vs_unstim	up
OCR_143318	chr6	73535629	73536239	5.48174	2.74299	100.144	1.43e-23	6.74e-22	CD4_8hr_vs_unstim	up
OCR_57074	chr15	44925875	44926196	4.83095	2.30764	100.124	1.44e-23	6.8e-22	CD4_8hr_vs_unstim	up
OCR_164417	chr8	43022021	43022874	-2.99944	2.93054	100.081	1.48e-23	6.94e-22	CD4_8hr_vs_unstim	down
OCR_121147	chr4	95269931	95270746	4.27929	2.99227	100.079	1.48e-23	6.95e-22	CD4_8hr_vs_unstim	up
OCR_34030	chr12	11237851	11238566	4.37062	2.9179	100.073	1.48e-23	6.96e-22	CD4_8hr_vs_unstim	up
OCR_37343	chr12	47812972	47813837	4.54337	2.61394	100.056	1.49e-23	7.02e-22	CD4_8hr_vs_unstim	up
OCR_94934	chr2	233100935	233101329	4.84557	2.05598	100.047	1.5e-23	7.06e-22	CD4_8hr_vs_unstim	up
OCR_76220	chr19	36201687	36202570	3.77983	3.27276	99.9864	1.55e-23	7.26e-22	CD4_8hr_vs_unstim	up
OCR_137479	chr5	169739491	169740265	2.52395	4.82978	99.9721	1.56e-23	7.31e-22	CD4_8hr_vs_unstim	up
OCR_79415	chr2	28672625	28673038	4.11114	2.46231	99.9161	1.6e-23	7.51e-22	CD4_8hr_vs_unstim	up
OCR_103721	chr3	15402800	15403632	3.08311	3.72466	99.876	1.64e-23	7.66e-22	CD4_8hr_vs_unstim	up
OCR_124724	chr4	147254404	147255225	3.24782	3.89083	99.8742	1.64e-23	7.67e-22	CD4_8hr_vs_unstim	up
OCR_7093	chr1	101643932	101645315	2.1099	5.89691	99.8452	1.66e-23	7.77e-22	CD4_8hr_vs_unstim	up
OCR_7081	chr1	101577447	101578369	-2.27976	5.11419	99.814	1.69e-23	7.89e-22	CD4_8hr_vs_unstim	down
OCR_165640	chr8	71586621	71587303	3.81532	3.11701	99.8151	1.69e-23	7.89e-22	CD4_8hr_vs_unstim	up
OCR_166425	chr8	82178619	82179259	3.5491	2.80665	99.8005	1.7e-23	7.94e-22	CD4_8hr_vs_unstim	up
OCR_131549	chr5	74058497	74058751	6.55807	1.70484	99.7548	1.74e-23	8.12e-22	CD4_8hr_vs_unstim	up
OCR_165334	chr8	66656961	66657686	3.18878	3.41616	99.7304	1.76e-23	8.21e-22	CD4_8hr_vs_unstim	up
OCR_106503	chr3	69331075	69331923	3.05166	3.97726	99.7092	1.78e-23	8.3e-22	CD4_8hr_vs_unstim	up
OCR_5524	chr1	84555119	84555482	3.22433	3.41258	99.7044	1.78e-23	8.31e-22	CD4_8hr_vs_unstim	up
OCR_30665	chr11	95808424	95809644	3.68176	3.00787	99.704	1.78e-23	8.31e-22	CD4_8hr_vs_unstim	up
OCR_81519	chr2	61045392	61045956	3.33193	3.18946	99.7021	1.79e-23	8.31e-22	CD4_8hr_vs_unstim	up
OCR_31519	chr11	104539485	104540350	2.90535	3.78601	99.6894	1.8e-23	8.36e-22	CD4_8hr_vs_unstim	up
OCR_84834	chr2	120514429	120514610	4.52934	2.34335	99.6841	1.8e-23	8.38e-22	CD4_8hr_vs_unstim	up
OCR_129806	chr5	39231715	39232593	3.5224	3.54051	99.6721	1.81e-23	8.42e-22	CD4_8hr_vs_unstim	up
OCR_164942	chr8	59671670	59672485	3.41821	3.2301	99.6461	1.84e-23	8.52e-22	CD4_8hr_vs_unstim	up
OCR_167740	chr8	100510609	100511312	3.06866	3.64421	99.6461	1.84e-23	8.52e-22	CD4_8hr_vs_unstim	up
OCR_44230	chr12	121474559	121474959	4.50194	2.43526	99.555	1.92e-23	8.92e-22	CD4_8hr_vs_unstim	up
OCR_43543	chr12	107378089	107378634	3.58093	3.05389	99.5505	1.93e-23	8.93e-22	CD4_8hr_vs_unstim	up
OCR_44534	chr12	125258735	125259935	2.98552	4.22276	99.5216	2.03e-23	9.41e-22	CD4_8hr_vs_unstim	up
OCR_6941	chr1	100223467	100224321	3.67365	3.17462	99.4399	2.04e-23	9.43e-22	CD4_8hr_vs_unstim	up
OCR_149707	chr6	145336922	145337624	4.27373	2.86263	99.4403	2.04e-23	9.43e-22	CD4_8hr_vs_unstim	up
OCR_66307	chr17	43396918	43397070	5.81057	1.70754	99.4204	2.06e-23	9.51e-22	CD4_8hr_vs_unstim	up
OCR_84398	chr2	113008839	113009241	3.79727	2.63383	99.4208	2.06e-23	9.51e-22	CD4_8hr_vs_unstim	up
OCR_59362	chr15	89746944	89747604	3.68352	2.78372	99.4097	2.07e-23	9.56e-22	CD4_8hr_vs_unstim	up
OCR_42523	chr12	93484441	93484999	3.80286	2.60637	99.376	2.11e-23	9.71e-22	CD4_8hr_vs_unstim	up
OCR_15154	chr1	223890674	223891266	3.76889	2.64182	99.3694	2.11e-23	9.74e-22	CD4_8hr_vs_unstim	up
OCR_20777	chr10	62296355	62296663	5.05354	2.24523	99.359	2.12e-23	9.78e-22	CD4_8hr_vs_unstim	up
OCR_140734	chr6	39078763	39078952	3.72381	2.72901	99.3601	2.12e-23	9.78e-22	CD4_8hr_vs_unstim	up
OCR_92589	chr2	204602152	204602445	3.82853	2.68061	99.3469	2.14e-23	9.83e-22	CD4_8hr_vs_unstim	up
OCR_60403	chr16	9162198	9162590	4.84393	2.40456	99.3349	2.15e-23	9.89e-22	CD4_8hr_vs_unstim	up
OCR_2217	chr1	38495720	38496247	3.30159	3.40798	99.3305	2.15e-23	9.9e-22	CD4_8hr_vs_unstim	up
OCR_61004	chr16	24679718	24680344	4.37065	3.01227	99.3214	2.16e-23	9.94e-22	CD4_8hr_vs_unstim	up
OCR_18887	chr10	30002979	30003896	3.79697	2.61421	99.3043	2.18e-23	1e-21	CD4_8hr_vs_unstim	up
OCR_54125	chr14	69599843	69600185	4.51426	2.249	99.2965	2.19e-23	1.01e-21	CD4_8hr_vs_unstim	up
OCR_76368	chr19	39145938	39146627	3.76518	2.86154	99.1809	2.32e-23	1.07e-21	CD4_8hr_vs_unstim	up
OCR_8618	chr1	117625672	117626628	4.49035	3.07993	99.1181	2.4e-23	1.1e-21	CD4_8hr_vs_unstim	up
OCR_60404	chr16	9166626	9167238	3.99066	2.59088	99.0619	2.47e-23	1.13e-21	CD4_8hr_vs_unstim	up
OCR_105994	chr3	56913463	56913833	5.33621	2.07007	99.0025	2.54e-23	1.16e-21	CD4_8hr_vs_unstim	up
OCR_110832	chr3	119630229	119631631	3.12942	3.67757	98.983	2.57e-23	1.17e-21	CD4_8hr_vs_unstim	up
OCR_17288	chr10	7438886	7439535	4.27542	2.50347	98.9625	2.59e-23	1.19e-21	CD4_8hr_vs_unstim	up
OCR_67801	chr17	62128508	62129101	-2.8674	3.03259	98.96	2.6e-23	1.19e-21	CD4_8hr_vs_unstim	down
OCR_34905	chr12	19534964	19535496	3.46639	3.57582	98.9201	2.65e-23	1.21e-21	CD4_8hr_vs_unstim	up
OCR_858	chr1	16277297	16277753	3.37919	3.12229	98.8564	2.74e-23	1.25e-21	CD4_8hr_vs_unstim	up
OCR_2487	chr1	42209664	42209861	5.43046	1.82137	98.8433	2.76e-23	1.26e-21	CD4_8hr_vs_unstim	up
OCR_35587	chr12	25074265	25074781	3.84426	3.00756	98.7898	2.83e-23	1.29e-21	CD4_8hr_vs_unstim	up
OCR_57646	chr15	57221357	57222445	3.46036	2.95879	98.772	2.86e-23	1.3e-21	CD4_8hr_vs_unstim	up
OCR_154461	chr7	45052938	45053619	-3.72709	1.76167	98.7697	2.86e-23	1.3e-21	CD4_8hr_vs_unstim	down
OCR_50236	chr13	99678337	99678846	3.45371	3.28328	98.7409	2.9e-23	1.32e-21	CD4_8hr_vs_unstim	up
OCR_69578	chr18	2636364	2637672	-2.47246	4.52839	98.7327	2.91e-23	1.32e-21	CD4_8hr_vs_unstim	down
OCR_176387	chr9	134533744	134534082	4.4874	2.20312	98.712	2.94e-23	1.34e-21	CD4_8hr_vs_unstim	up
OCR_83605	chr2	99308852	99309623	3.17525	3.39806	98.6993	2.96e-23	1.35e-21	CD4_8hr_vs_unstim	up
OCR_80375	chr2	43653357	43654092	2.92316	3.9962	98.6805	2.99e-23	1.36e-21	CD4_8hr_vs_unstim	up
OCR_20993	chr10	64440914	64441812	2.35552	5.15805	98.6783	2.99e-23	1.36e-21	CD4_8hr_vs_unstim	up
OCR_92632	chr2	204795956	204796325	4.23444	2.45215	98.6767	3e-23	1.36e-21	CD4_8hr_vs_unstim	up
OCR_24143	chr10	112507653	112508219	3.74205	3.28092	98.6601	3.02e-23	1.37e-21	CD4_8hr_vs_unstim	up
OCR_13444	chr1	199271358	199272701	3.30332	3.20062	98.6499	3.04e-23	1.38e-21	CD4_8hr_vs_unstim	up
OCR_356	chr1	7976299	7976703	5.36138	1.70456	98.638	3.06e-23	1.38e-21	CD4_8hr_vs_unstim	up
OCR_22207	chr10	82232022	82232419	3.20338	3.79215	98.6371	3.06e-23	1.38e-21	CD4_8hr_vs_unstim	up
OCR_57362	chr15	52018532	52018978	3.34914	3.21063	98.6163	3.09e-23	1.4e-21	CD4_8hr_vs_unstim	up
OCR_58124	chr15	64721645	64722183	3.43839	2.84719	98.5973	3.12e-23	1.41e-21	CD4_8hr_vs_unstim	up
OCR_122345	chr4	113040190	113041411	3.43989	3.88236	98.5633	3.17e-23	1.43e-21	CD4_8hr_vs_unstim	up
OCR_30604	chr11	95289259	95290409	3.91255	2.93465	98.549	3.2e-23	1.44e-21	CD4_8hr_vs_unstim	up
OCR_130452	chr5	52056510	52057200	3.95677	2.994	98.538	3.21e-23	1.45e-21	CD4_8hr_vs_unstim	up
OCR_65637	chr17	35988972	35989723	4.35696	2.05076	98.5307	3.23e-23	1.45e-21	CD4_8hr_vs_unstim	up
OCR_123144	chr4	123474118	123474843	3.77518	2.98586	98.5307	3.23e-23	1.45e-21	CD4_8hr_vs_unstim	up
OCR_64338	chr17	11944522	11945023	4.23265	2.56637	98.4749	3.32e-23	1.49e-21	CD4_8hr_vs_unstim	up
OCR_15224	chr1	224810820	224812340	-2.57106	4.27846	98.4689	3.33e-23	1.5e-21	CD4_8hr_vs_unstim	down
OCR_106408	chr3	67436779	67437498	3.91842	2.7734	98.4521	3.36e-23	1.51e-21	CD4_8hr_vs_unstim	up
OCR_87953	chr2	160751571	160752411	3.53305	3.64617	98.4375	3.38e-23	1.52e-21	CD4_8hr_vs_unstim	up
OCR_6348	chr1	93443133	93443762	4.42905	3.20464	98.3873	3.47e-23	1.56e-21	CD4_8hr_vs_unstim	up
OCR_124945	chr4	152803329	152804410	3.32499	3.52774	98.3796	3.48e-23	1.56e-21	CD4_8hr_vs_unstim	up
OCR_103474	chr3	11137571	11138875	2.97677	3.91468	98.3767	3.49e-23	1.56e-21	CD4_8hr_vs_unstim	up
OCR_106209	chr3	60039142	60039747	3.44338	2.85386	98.3549	3.53e-23	1.58e-21	CD4_8hr_vs_unstim	up
OCR_174335	chr9	92221657	92222213	3.24929	3.32386	98.3523	3.53e-23	1.58e-21	CD4_8hr_vs_unstim	up
OCR_158585	chr7	110646058	110646459	3.49227	2.82284	98.3049	3.62e-23	1.62e-21	CD4_8hr_vs_unstim	up
OCR_94578	chr2	228327829	228328055	3.992	2.76795	98.2929	3.64e-23	1.63e-21	CD4_8hr_vs_unstim	up
OCR_67230	chr17	53811508	53812398	3.89881	3.68592	98.2653	3.69e-23	1.65e-21	CD4_8hr_vs_unstim	up
OCR_16683	chr1	247506049	247506599	5.32769	2.1264	98.2542	3.71e-23	1.66e-21	CD4_8hr_vs_unstim	up
OCR_81518	chr2	61033870	61034967	2.54412	4.82381	98.2551	3.71e-23	1.66e-21	CD4_8hr_vs_unstim	up
OCR_165583	chr8	71084746	71085499	3.06523	3.75173	98.2431	3.73e-23	1.67e-21	CD4_8hr_vs_unstim	up
OCR_45671	chr13	38957016	38957489	5.3665	2.35824	98.2213	3.77e-23	1.68e-21	CD4_8hr_vs_unstim	up
OCR_1121	chr1	21578524	21579218	4.6036	2.07657	98.2116	3.79e-23	1.69e-21	CD4_8hr_vs_unstim	up
OCR_66661	chr17	47723786	47724725	3.70244	2.93746	98.2067	3.8e-23	1.69e-21	CD4_8hr_vs_unstim	up
OCR_109657	chr3	105933821	105934373	3.26678	2.99838	98.1597	3.89e-23	1.73e-21	CD4_8hr_vs_unstim	up
OCR_124722	chr4	147164213	147165215	2.29038	5.27843	98.1015	4.01e-23	1.78e-21	CD4_8hr_vs_unstim	up
OCR_136398	chr5	148088367	148089196	4.6129	3.07856	98.0723	4.07e-23	1.81e-21	CD4_8hr_vs_unstim	up
OCR_13972	chr1	206763284	206764052	2.90493	3.91092	97.9832	4.25e-23	1.89e-21	CD4_8hr_vs_unstim	up
OCR_45326	chr13	30404658	30405675	4.63753	2.32412	97.9813	4.26e-23	1.89e-21	CD4_8hr_vs_unstim	up
OCR_116172	chr4	3304076	3304899	-2.42227	4.68842	97.9528	4.32e-23	1.92e-21	CD4_8hr_vs_unstim	down
OCR_77968	chr2	1512936	1513873	-2.87484	3.0641	97.9464	4.33e-23	1.92e-21	CD4_8hr_vs_unstim	down
OCR_144649	chr6	91429119	91429973	4.71181	2.69915	97.9365	4.35e-23	1.93e-21	CD4_8hr_vs_unstim	up
OCR_77365	chr19	49972185	49972774	-2.6677	3.70833	97.931	4.37e-23	1.94e-21	CD4_8hr_vs_unstim	down
OCR_32062	chr11	111284416	111285514	2.75951	4.16112	97.9165	4.4e-23	1.95e-21	CD4_8hr_vs_unstim	up
OCR_122107	chr4	109347092	109347579	4.14357	2.6329	97.9084	4.42e-23	1.96e-21	CD4_8hr_vs_unstim	up
OCR_110470	chr3	114131045	114131625	3.68026	2.87372	97.8854	4.47e-23	1.98e-21	CD4_8hr_vs_unstim	up
OCR_600	chr1	10793819	10794341	4.79815	2.30618	97.8439	4.56e-23	2.02e-21	CD4_8hr_vs_unstim	up
OCR_138808	chr6	13453992	13454453	3.06801	3.53648	97.8321	4.59e-23	2.03e-21	CD4_8hr_vs_unstim	up
OCR_37182	chr12	46624734	46625149	3.98379	2.46506	97.8182	4.62e-23	2.04e-21	CD4_8hr_vs_unstim	up
OCR_358	chr1	7980438	7981193	4.32753	2.37395	97.7891	4.69e-23	2.07e-21	CD4_8hr_vs_unstim	up
OCR_122356	chr4	113120464	113121363	4.32821	3.17557	97.7786	4.72e-23	2.08e-21	CD4_8hr_vs_unstim	up
OCR_118138	chr4	43454832	43455593	-3.24515	2.52944	97.7872	4.73e-23	2.09e-21	CD4_8hr_vs_unstim	down
OCR_132014	chr5	81661330	81662110	4.05308	2.75819	97.7323	4.83e-23	2.13e-21	CD4_8hr_vs_unstim	up
OCR_97686	chr20	50087082	50088149	3.33873	3.27024	97.7055	4.89e-23	2.16e-21	CD4_8hr_vs_unstim	up
OCR_151767	chr7	8171404	8172337	-2.3273	4.88016	97.6867	4.94e-23	2.18e-21	CD4_8hr_vs_unstim	down
OCR_131379	chr5	67640297	67640622	3.85518	2.41769	97.683	4.95e-23	2.18e-21	CD4_8hr_vs_unstim	up
OCR_55457	chr14	97923206	97923699	3.19331	3.30378	97.6515	5.03e-23	2.21e-21	CD4_8hr_vs_unstim	up
OCR_101152	chr22	18188845	18189667	3.20673	3.43021	97.6299	5.08e-23	2.24e-21	CD4_8hr_vs_unstim	up
OCR_65687	chr17	36857634	36859079	2.04723	5.91572	97.605	5.15e-23	2.26e-21	CD4_8hr_vs_unstim	up
OCR_45664	chr13	38922484	38922806	3.22258	3.5854	97.5996	5.16e-23	2.27e-21	CD4_8hr_vs_unstim	up
OCR_180365	chrX	135769479	135770288	3.38704	3.24642	97.5926	5.18e-23	2.27e-21	CD4_8hr_vs_unstim	up
OCR_25022	chr10	134140424	134140846	4.35126	2.5226	97.5914	5.18e-23	2.27e-21	CD4_8hr_vs_unstim	up
OCR_173554	chr9	75834690	75835620	2.89383	4.7479	97.5768	5.22e-23	2.29e-21	CD4_8hr_vs_unstim	up
OCR_21023	chr10	64604061	64604762	3.34657	3.18175	97.555	5.28e-23	2.31e-21	CD4_8hr_vs_unstim	up
OCR_2082	chr1	36021244	36021468	5.06523	1.79896	97.5526	5.29e-23	2.31e-21	CD4_8hr_vs_unstim	up
OCR_151391	chr7	2149886	2150470	4.08107	2.54284	97.5501	5.29e-23	2.32e-21	CD4_8hr_vs_unstim	up
OCR_8816	chr1	144891618	144892092	4.59874	2.07163	97.5155	5.39e-23	2.36e-21	CD4_8hr_vs_unstim	up
OCR_2148	chr1	36924358	36925018	3.93273	2.61583	97.5094	5.4e-23	2.36e-21	CD4_8hr_vs_unstim	up
OCR_139484	chr6	24951993	24952589	-2.7922	3.23244	97.4585	5.54e-23	2.42e-21	CD4_8hr_vs_unstim	down
OCR_18556	chr10	25211227	25211715	4.79523	2.27909	97.4389	5.6e-23	2.44e-21	CD4_8hr_vs_unstim	up
OCR_101554	chr22	25472071	25472846	3.25385	3.28038	97.4351	5.61e-23	2.45e-21	CD4_8hr_vs_unstim	up
OCR_78577	chr2	12644550	12645024	3.96736	2.84194	97.4183	5.66e-23	2.47e-21	CD4_8hr_vs_unstim	up
OCR_4797	chr1	78441159	78441338	3.80743	2.77261	97.415	5.67e-23	2.47e-21	CD4_8hr_vs_unstim	up
OCR_97250	chr20	42697125	42698636	-2.40288	4.66716	97.3958	5.72e-23	2.49e-21	CD4_8hr_vs_unstim	down
OCR_67260	chr17	54369913	54370376	3.96826	2.74662	97.3902	5.74e-23	2.5e-21	CD4_8hr_vs_unstim	up
OCR_2554	chr1	43126794	43127130	4.46438	2.30079	97.3621	5.82e-23	2.53e-21	CD4_8hr_vs_unstim	up
OCR_103324	chr3	8398474	8399653	-2.42268	4.61521	97.3168	5.95e-23	2.59e-21	CD4_8hr_vs_unstim	down
OCR_123206	chr4	124409910	124410829	3.39427	3.14394	97.2849	6.05e-23	2.63e-21	CD4_8hr_vs_unstim	up
OCR_63173	chr16	84792474	84793185	-3.26783	2.17636	97.2736	6.09e-23	2.64e-21	CD4_8hr_vs_unstim	down
OCR_135359	chr5	127532474	127533123	-2.7439	3.42986	97.2739	6.08e-23	2.64e-21	CD4_8hr_vs_unstim	down
OCR_62457	chr16	68039554	68040246	-2.84741	3.04498	97.2649	6.11e-23	2.65e-21	CD4_8hr_vs_unstim	down
OCR_116602	chr4	15772729	15773654	3.23577	3.60381	97.2457	6.17e-23	2.68e-21	CD4_8hr_vs_unstim	up
OCR_4665	chr1	76960382	76960991	4.18193	3.09241	97.2221	6.25e-23	2.71e-21	CD4_8hr_vs_unstim	up
OCR_140386	chr6	34452266	34453197	3.13061	3.40568	97.2186	6.26e-23	2.71e-21	CD4_8hr_vs_unstim	up
OCR_67870	chr17	62970364	62971201	2.72653	4.24466	97.1794	6.38e-23	2.76e-21	CD4_8hr_vs_unstim	up
OCR_30667	chr11	95817886	95819043	3.17227	3.45387	97.1661	6.43e-23	2.78e-21	CD4_8hr_vs_unstim	up
OCR_177173	chrX	13916252	13917300	4.80433	2.58249	97.1109	6.61e-23	2.86e-21	CD4_8hr_vs_unstim	up
OCR_857	chr1	16276824	16277201	3.48589	2.90247	97.0362	6.86e-23	2.97e-21	CD4_8hr_vs_unstim	up
OCR_70751	chr18	28742339	28743777	-2.43494	4.5544	97.0049	6.97e-23	3.01e-21	CD4_8hr_vs_unstim	down
OCR_135288	chr5	126083473	126084217	2.43372	4.90905	96.9972	7e-23	3.02e-21	CD4_8hr_vs_unstim	up
OCR_126549	chr4	177115130	177115687	3.12002	4.30289	96.9946	7.01e-23	3.02e-21	CD4_8hr_vs_unstim	up
OCR_22093	chr10	80750974	80751396	4.6235	2.2358	96.9824	7.05e-23	3.04e-21	CD4_8hr_vs_unstim	up
OCR_67305	chr17	54992815	54993095	3.4757	3.01106	96.9806	7.06e-23	3.04e-21	CD4_8hr_vs_unstim	up
OCR_97937	chr20	55972776	55973925	-1.97222	6.01944	96.9766	7.07e-23	3.05e-21	CD4_8hr_vs_unstim	down
OCR_129572	chr5	35785660	35786375	3.18882	3.39401	96.9756	7.07e-23	3.05e-21	CD4_8hr_vs_unstim	up
OCR_147955	chr6	128105589	128106273	3.62207	3.26371	96.8924	7.38e-23	3.17e-21	CD4_8hr_vs_unstim	up
OCR_69570	chr18	2592703	2593168	4.62473	1.88932	96.8903	7.39e-23	3.18e-21	CD4_8hr_vs_unstim	up
OCR_91118	chr2	191880040	191880295	3.65791	2.87466	96.8338	7.6e-23	3.27e-21	CD4_8hr_vs_unstim	up
OCR_164928	chr8	59570408	59570805	2.87763	3.85045	96.8203	7.65e-23	3.29e-21	CD4_8hr_vs_unstim	up
OCR_58412	chr15	68880245	68880739	5.32206	1.90599	96.8084	7.7e-23	3.3e-21	CD4_8hr_vs_unstim	up
OCR_75447	chr19	17561150	17561712	4.45897	2.08691	96.7683	7.86e-23	3.37e-21	CD4_8hr_vs_unstim	up
OCR_138660	chr6	11324526	11325394	3.51333	3.01558	96.7672	7.86e-23	3.37e-21	CD4_8hr_vs_unstim	up
OCR_92656	chr2	204862826	204863672	3.71098	2.82157	96.733	8e-23	3.43e-21	CD4_8hr_vs_unstim	up
OCR_20731	chr10	61664750	61665267	2.37179	5.1429	96.6201	8.46e-23	3.63e-21	CD4_8hr_vs_unstim	up
OCR_74433	chr19	5718141	5718366	4.79173	1.79644	96.5607	8.72e-23	3.73e-21	CD4_8hr_vs_unstim	up
OCR_111897	chr3	142216555	142216897	6.46732	2.303	96.5478	8.78e-23	3.75e-21	CD4_8hr_vs_unstim	up
OCR_148649	chr6	134609439	134610439	2.61384	4.54772	96.5487	8.78e-23	3.75e-21	CD4_8hr_vs_unstim	up
OCR_27921	chr11	44622956	44623986	3.92259	2.87886	96.5326	8.85e-23	3.78e-21	CD4_8hr_vs_unstim	up
OCR_39327	chr12	68153462	68154080	3.60323	3.23495	96.4886	9.06e-23	3.87e-21	CD4_8hr_vs_unstim	up
OCR_166136	chr8	79432505	79433052	2.63407	4.76142	96.4864	9.06e-23	3.87e-21	CD4_8hr_vs_unstim	up
OCR_3055	chr1	53806516	53807120	4.44051	2.13897	96.4522	9.21e-23	3.93e-21	CD4_8hr_vs_unstim	up
OCR_66793	chr17	49198910	49199641	2.79877	4.09041	96.5014	9.23e-23	3.93e-21	CD4_8hr_vs_unstim	up
OCR_20973	chr10	64192896	64193426	4.34015	2.24434	96.4403	9.27e-23	3.95e-21	CD4_8hr_vs_unstim	up
OCR_153235	chr7	23060127	23061158	3.22891	3.47708	96.4277	9.33e-23	3.97e-21	CD4_8hr_vs_unstim	up
OCR_78236	chr2	7728428	7728857	4.74722	2.20377	96.4148	9.39e-23	4e-21	CD4_8hr_vs_unstim	up
OCR_104647	chr3	30790596	30791306	3.89573	2.65212	96.3874	9.52e-23	4.05e-21	CD4_8hr_vs_unstim	up
OCR_169079	chr8	117436024	117436899	3.62513	3.56312	96.3689	9.61e-23	4.09e-21	CD4_8hr_vs_unstim	up
OCR_60521	chr16	11665967	11666542	-3.12574	2.66364	96.3624	9.72e-23	4.13e-21	CD4_8hr_vs_unstim	down
OCR_103383	chr3	9778511	9779081	4.21225	2.14445	96.2774	1.01e-22	4.27e-21	CD4_8hr_vs_unstim	up
OCR_139235	chr6	20367648	20368336	3.11443	3.21101	96.2751	1.01e-22	4.28e-21	CD4_8hr_vs_unstim	up
OCR_66528	chr17	46484250	46485195	3.95576	2.37426	96.2699	1.01e-22	4.29e-21	CD4_8hr_vs_unstim	up
OCR_173503	chr9	75140119	75140423	3.72153	2.88013	96.2178	1.04e-22	4.4e-21	CD4_8hr_vs_unstim	up
OCR_27309	chr11	35168322	35168647	3.35172	3.13098	96.2134	1.04e-22	4.41e-21	CD4_8hr_vs_unstim	up
OCR_58403	chr15	68644602	68645490	3.38165	2.97352	96.1384	1.08e-22	4.57e-21	CD4_8hr_vs_unstim	up
OCR_37552	chr12	50097478	50097920	3.02437	3.46072	96.125	1.09e-22	4.6e-21	CD4_8hr_vs_unstim	up
OCR_42133	chr12	90674253	90674954	2.94707	4.43643	96.0659	1.12e-22	4.74e-21	CD4_8hr_vs_unstim	up
OCR_109883	chr3	107804780	107805129	3.11138	3.41654	96.0566	1.13e-22	4.76e-21	CD4_8hr_vs_unstim	up
OCR_151597	chr7	5873219	5874501	-2.69018	3.60879	96.0422	1.13e-22	4.79e-21	CD4_8hr_vs_unstim	down
OCR_150756	chr6	159518213	159518659	3.81788	2.54381	96.0331	1.14e-22	4.81e-21	CD4_8hr_vs_unstim	up
OCR_101599	chr22	26826831	26827677	4.16519	2.95087	96.0173	1.15e-22	4.84e-21	CD4_8hr_vs_unstim	up
OCR_158127	chr7	106065291	106066198	2.89363	4.24739	96.0805	1.15e-22	4.87e-21	CD4_8hr_vs_unstim	up
OCR_104893	chr3	33889913	33890936	-2.76144	3.28988	95.9837	1.17e-22	4.92e-21	CD4_8hr_vs_unstim	down
OCR_61690	chr16	50733651	50734257	3.8682	2.63731	95.975	1.17e-22	4.95e-21	CD4_8hr_vs_unstim	up
OCR_131380	chr5	67640667	67641105	3.68389	2.60982	95.9544	1.18e-22	4.99e-21	CD4_8hr_vs_unstim	up
OCR_148024	chr6	128418970	128419758	3.26451	3.50731	95.9427	1.19e-22	5.02e-21	CD4_8hr_vs_unstim	up
OCR_124664	chr4	146220441	146221636	2.68848	4.35487	95.9409	1.19e-22	5.02e-21	CD4_8hr_vs_unstim	up
OCR_59649	chr15	94772826	94773435	2.62995	4.3954	95.9071	1.21e-22	5.1e-21	CD4_8hr_vs_unstim	up
OCR_10385	chr1	169295970	169296557	4.74712	2.63661	95.8801	1.23e-22	5.17e-21	CD4_8hr_vs_unstim	up
OCR_2493	chr1	42256915	42258390	3.06629	3.34722	95.8526	1.25e-22	5.24e-21	CD4_8hr_vs_unstim	up
OCR_177263	chrX	16497345	16497768	4.30709	1.98881	95.8351	1.26e-22	5.28e-21	CD4_8hr_vs_unstim	up
OCR_103134	chr3	4429315	4430028	4.039	2.90398	95.8011	1.28e-22	5.37e-21	CD4_8hr_vs_unstim	up
OCR_87965	chr2	160816985	160817350	4.19019	2.53156	95.7905	1.29e-22	5.4e-21	CD4_8hr_vs_unstim	up
OCR_46512	chr13	52367488	52368196	3.44035	2.98882	95.7586	1.32e-22	5.52e-21	CD4_8hr_vs_unstim	up
OCR_115922	chr3	197125312	197125737	5.29585	1.75728	95.6708	1.37e-22	5.73e-21	CD4_8hr_vs_unstim	up
OCR_55388	chr14	95929356	95930767	-2.53428	4.13523	95.6561	1.38e-22	5.77e-21	CD4_8hr_vs_unstim	down
OCR_171693	chr9	20358100	20358609	2.96094	3.68107	95.6323	1.39e-22	5.83e-21	CD4_8hr_vs_unstim	up
OCR_76767	chr19	43132379	43133249	4.31014	2.28262	95.6287	1.4e-22	5.84e-21	CD4_8hr_vs_unstim	up
OCR_120385	chr4	82645945	82646695	3.12539	3.27137	95.598	1.42e-22	5.93e-21	CD4_8hr_vs_unstim	up
OCR_72058	chr18	56208795	56209597	2.97328	4.03578	95.5919	1.42e-22	5.94e-21	CD4_8hr_vs_unstim	up
OCR_1400	chr1	25357117	25357641	2.86225	3.85487	95.5775	1.43e-22	5.98e-21	CD4_8hr_vs_unstim	up
OCR_8324	chr1	113446290	113447061	3.88878	2.92165	95.5618	1.44e-22	6.03e-21	CD4_8hr_vs_unstim	up
OCR_10437	chr1	169652277	169652678	4.29059	2.07618	95.5564	1.45e-22	6.04e-21	CD4_8hr_vs_unstim	up
OCR_2524	chr1	42482957	42483331	5.70032	2.00212	95.5329	1.47e-22	6.11e-21	CD4_8hr_vs_unstim	up
OCR_19765	chr10	52261276	52262106	3.52412	2.9626	95.5225	1.47e-22	6.14e-21	CD4_8hr_vs_unstim	up
OCR_136613	chr5	150650093	150650578	4.33854	2.81421	95.5078	1.48e-22	6.18e-21	CD4_8hr_vs_unstim	up
OCR_104297	chr3	24089068	24089905	4.57221	3.03273	95.4633	1.52e-22	6.32e-21	CD4_8hr_vs_unstim	up
OCR_106663	chr3	71421960	71422724	-2.51731	4.23691	95.4598	1.52e-22	6.33e-21	CD4_8hr_vs_unstim	down
OCR_10431	chr1	169617289	169618775	2.82514	3.97243	95.4441	1.53e-22	6.37e-21	CD4_8hr_vs_unstim	up
OCR_136466	chr5	148941387	148941938	3.25932	3.25142	95.436	1.54e-22	6.4e-21	CD4_8hr_vs_unstim	up
OCR_57934	chr15	61053247	61054086	4.29391	2.23436	95.4213	1.55e-22	6.44e-21	CD4_8hr_vs_unstim	up
OCR_146987	chr6	118508146	118509284	3.07749	4.18854	95.4218	1.55e-22	6.44e-21	CD4_8hr_vs_unstim	up
OCR_117736	chr4	35977247	35978308	4.02109	3.17284	95.4026	1.57e-22	6.49e-21	CD4_8hr_vs_unstim	up
OCR_138264	chr6	4637923	4638623	4.33386	2.80211	95.4037	1.56e-22	6.49e-21	CD4_8hr_vs_unstim	up
OCR_80344	chr2	43361110	43361881	-2.29245	4.9452	95.3982	1.57e-22	6.5e-21	CD4_8hr_vs_unstim	down
OCR_82037	chr2	69902432	69902949	4.10174	2.55211	95.389	1.58e-22	6.53e-21	CD4_8hr_vs_unstim	up
OCR_121519	chr4	101000328	101000819	3.5249	3.29379	95.3783	1.58e-22	6.56e-21	CD4_8hr_vs_unstim	up
OCR_54517	chr14	76028424	76028725	4.3525	2.36933	95.3425	1.61e-22	6.68e-21	CD4_8hr_vs_unstim	up
OCR_37322	chr12	47743523	47744632	2.60858	4.48628	95.3203	1.63e-22	6.75e-21	CD4_8hr_vs_unstim	up
OCR_355	chr1	7975951	7976242	4.29912	1.97948	95.2994	1.65e-22	6.82e-21	CD4_8hr_vs_unstim	up
OCR_82289	chr2	74280077	74281049	-3.02647	2.61253	95.2872	1.66e-22	6.85e-21	CD4_8hr_vs_unstim	down
OCR_87096	chr2	153429639	153430156	3.52293	3.23873	95.2648	1.68e-22	6.93e-21	CD4_8hr_vs_unstim	up
OCR_129807	chr5	39256384	39257110	3.26699	3.23487	95.2544	1.69e-22	6.96e-21	CD4_8hr_vs_unstim	up
OCR_68005	chr17	64368149	64368715	4.21799	2.49532	95.2401	1.7e-22	7.01e-21	CD4_8hr_vs_unstim	up
OCR_172944	chr9	33506551	33507187	5.27731	1.94838	95.2279	1.71e-22	7.05e-21	CD4_8hr_vs_unstim	up
OCR_29910	chr11	82706584	82707533	3.69115	3.45046	95.2064	1.73e-22	7.12e-21	CD4_8hr_vs_unstim	up
OCR_180955	chrY	15586833	15587311	3.68333	3.43169	95.2002	1.73e-22	7.14e-21	CD4_8hr_vs_unstim	up
OCR_55116	chr14	91435635	91436880	3.73477	3.17561	95.1461	1.78e-22	7.33e-21	CD4_8hr_vs_unstim	up
OCR_158218	chr7	107408741	107409231	5.27221	1.86755	95.1006	1.82e-22	7.5e-21	CD4_8hr_vs_unstim	up
OCR_103931	chr3	18140326	18141037	4.30675	2.50194	95.0913	1.83e-22	7.53e-21	CD4_8hr_vs_unstim	up
OCR_154289	chr7	42970491	42970874	4.07314	2.3594	95.065	1.86e-22	7.63e-21	CD4_8hr_vs_unstim	up
OCR_94300	chr2	224804228	224804481	3.67811	2.86844	95.056	1.86e-22	7.66e-21	CD4_8hr_vs_unstim	up
OCR_169200	chr8	119119536	119119801	4.6062	2.51022	95.0482	1.87e-22	7.68e-21	CD4_8hr_vs_unstim	up
OCR_149755	chr6	146144421	146144877	3.67056	3.35816	95.0288	1.89e-22	7.75e-21	CD4_8hr_vs_unstim	up
OCR_101667	chr22	29305279	29305776	4.97589	2.32645	95.0269	1.89e-22	7.76e-21	CD4_8hr_vs_unstim	up
OCR_2463	chr1	42092521	42093135	4.02739	2.53457	95.0092	1.91e-22	7.82e-21	CD4_8hr_vs_unstim	up
OCR_176447	chr9	135547291	135547566	5.75259	1.61568	95.0138	1.91e-22	7.82e-21	CD4_8hr_vs_unstim	up
OCR_163882	chr8	29357476	29358022	3.81895	2.59402	95.003	1.92e-22	7.84e-21	CD4_8hr_vs_unstim	up
OCR_146029	chr6	106549913	106550314	3.23953	3.47043	94.9984	1.92e-22	7.85e-21	CD4_8hr_vs_unstim	up
OCR_146930	chr6	117784831	117786161	3.23094	3.81347	94.9853	1.93e-22	7.9e-21	CD4_8hr_vs_unstim	up
OCR_36129	chr12	31886216	31886434	3.68654	2.86998	94.9768	1.94e-22	7.93e-21	CD4_8hr_vs_unstim	up
OCR_53265	chr14	55196779	55197671	2.78505	4.25641	94.9259	1.99e-22	8.13e-21	CD4_8hr_vs_unstim	up
OCR_100443	chr21	36469059	36469753	4.33437	2.21301	94.9236	1.99e-22	8.14e-21	CD4_8hr_vs_unstim	up
OCR_148673	chr6	134757173	134757975	3.09101	3.39556	94.9104	2.01e-22	8.19e-21	CD4_8hr_vs_unstim	up
OCR_134470	chr5	111066371	111067136	3.75951	2.76048	94.8982	2.02e-22	8.23e-21	CD4_8hr_vs_unstim	up
OCR_69409	chr17	80084338	80085939	-2.09163	5.55474	94.9086	2.03e-22	8.27e-21	CD4_8hr_vs_unstim	down
OCR_10351	chr1	168598000	168598489	4.56103	2.19751	94.888	2.03e-22	8.27e-21	CD4_8hr_vs_unstim	up
OCR_23303	chr10	99204004	99204346	4.75259	2.08943	94.8419	2.08e-22	8.45e-21	CD4_8hr_vs_unstim	up
OCR_136651	chr5	151406009	151406757	-3.10627	2.49955	94.8426	2.08e-22	8.45e-21	CD4_8hr_vs_unstim	down
OCR_45548	chr13	34213700	34214466	4.28355	3.53141	94.8184	2.1e-22	8.55e-21	CD4_8hr_vs_unstim	up
OCR_109852	chr3	107660733	107661522	3.09983	3.64867	94.809	2.11e-22	8.59e-21	CD4_8hr_vs_unstim	up
OCR_127900	chr5	16457646	16458536	3.31267	3.12246	94.7865	2.14e-22	8.68e-21	CD4_8hr_vs_unstim	up
OCR_696	chr1	12217902	12218264	3.72933	2.70452	94.7665	2.16e-22	8.76e-21	CD4_8hr_vs_unstim	up
OCR_143513	chr6	75984639	75985400	3.67042	2.53134	94.7364	2.19e-22	8.89e-21	CD4_8hr_vs_unstim	up
OCR_153344	chr7	24917315	24918113	3.07588	3.67612	94.7025	2.23e-22	9.04e-21	CD4_8hr_vs_unstim	up
OCR_87108	chr2	153513373	153513950	4.41551	2.95254	94.646	2.29e-22	9.3e-21	CD4_8hr_vs_unstim	up
OCR_158540	chr7	110263166	110263836	3.9725	2.26352	94.636	2.31e-22	9.34e-21	CD4_8hr_vs_unstim	up
OCR_161366	chr7	141263801	141264633	3.22782	3.67923	94.6305	2.31e-22	9.36e-21	CD4_8hr_vs_unstim	up
OCR_84078	chr2	106425323	106426215	3.17438	3.29205	94.5935	2.36e-22	9.53e-21	CD4_8hr_vs_unstim	up
OCR_153859	chr7	35762668	35763053	3.02785	3.4926	94.6514	2.37e-22	9.59e-21	CD4_8hr_vs_unstim	up
OCR_134250	chr5	108089667	108090113	4.28529	2.48529	94.4719	2.5e-22	1.01e-20	CD4_8hr_vs_unstim	up
OCR_101359	chr22	22145698	22146701	3.67279	2.70224	94.422	2.57e-22	1.04e-20	CD4_8hr_vs_unstim	up
OCR_164302	chr8	41828825	41829549	-2.77443	3.08619	94.3918	2.62e-22	1.06e-20	CD4_8hr_vs_unstim	down
OCR_17146	chr10	6215037	6215806	-2.71104	3.35879	94.3418	2.67e-22	1.08e-20	CD4_8hr_vs_unstim	down
OCR_103773	chr3	16336362	16336801	3.01218	3.34779	94.3206	2.7e-22	1.09e-20	CD4_8hr_vs_unstim	up
OCR_61279	chr16	29833370	29833825	4.19336	2.27781	94.2984	2.73e-22	1.1e-20	CD4_8hr_vs_unstim	up
OCR_121400	chr4	99407043	99407478	3.95594	2.81089	94.1707	2.92e-22	1.18e-20	CD4_8hr_vs_unstim	up
OCR_180650	chrX	150048273	150048870	3.71084	2.9407	94.1494	2.95e-22	1.19e-20	CD4_8hr_vs_unstim	up
OCR_111164	chr3	125637805	125638027	4.72218	2.47986	94.1371	2.97e-22	1.19e-20	CD4_8hr_vs_unstim	up
OCR_10172	chr1	167072575	167073456	3.20833	3.32914	94.1137	3e-22	1.21e-20	CD4_8hr_vs_unstim	up
OCR_23728	chr10	105853418	105854147	6.44	1.62247	94.1042	3.02e-22	1.21e-20	CD4_8hr_vs_unstim	up
OCR_77089	chr19	47288034	47288320	3.93283	2.21044	94.081	3.05e-22	1.23e-20	CD4_8hr_vs_unstim	up
OCR_15819	chr1	234636801	234637374	4.71977	2.5498	94.0558	3.09e-22	1.24e-20	CD4_8hr_vs_unstim	up
OCR_34239	chr12	13500054	13500853	3.8602	3.17038	94.0546	3.09e-22	1.24e-20	CD4_8hr_vs_unstim	up
OCR_43462	chr12	105323912	105324979	3.89075	2.85502	94.0536	3.09e-22	1.24e-20	CD4_8hr_vs_unstim	up
OCR_46147	chr13	46421599	46422310	-2.58068	4.00641	94.0496	3.1e-22	1.24e-20	CD4_8hr_vs_unstim	down
OCR_53089	chr14	52143155	52143966	3.91729	3.09245	94.0473	3.1e-22	1.24e-20	CD4_8hr_vs_unstim	up
OCR_110247	chr3	111790672	111791845	-1.96028	5.89263	94.0358	3.12e-22	1.25e-20	CD4_8hr_vs_unstim	down
OCR_91140	chr2	191968383	191968873	3.9012	2.7463	94.0322	3.13e-22	1.25e-20	CD4_8hr_vs_unstim	up
OCR_42285	chr12	91886280	91886766	4.17555	2.43933	94.0252	3.14e-22	1.26e-20	CD4_8hr_vs_unstim	up
OCR_16973	chr10	3909431	3910354	3.82969	2.39009	94.0042	3.17e-22	1.27e-20	CD4_8hr_vs_unstim	up
OCR_2472	chr1	42136072	42136606	3.93182	2.5499	93.9879	3.2e-22	1.28e-20	CD4_8hr_vs_unstim	up
OCR_178931	chrX	77320268	77321169	3.71065	3.18104	93.9887	3.2e-22	1.28e-20	CD4_8hr_vs_unstim	up
OCR_74901	chr19	11642878	11643105	4.7802	1.80761	93.9191	3.31e-22	1.32e-20	CD4_8hr_vs_unstim	up
OCR_111298	chr3	128512991	128513740	2.96785	3.84153	93.8549	3.42e-22	1.37e-20	CD4_8hr_vs_unstim	up
OCR_175211	chr9	108303997	108304665	3.83132	3.44101	93.8406	3.45e-22	1.37e-20	CD4_8hr_vs_unstim	up
OCR_110994	chr3	122201673	122202420	3.58001	3.09152	93.8255	3.47e-22	1.38e-20	CD4_8hr_vs_unstim	up
OCR_8657	chr1	118201272	118201702	-2.5963	3.83382	93.8182	3.48e-22	1.39e-20	CD4_8hr_vs_unstim	down
OCR_1342	chr1	24825767	24825998	4.42355	1.87201	93.8072	3.5e-22	1.4e-20	CD4_8hr_vs_unstim	up
OCR_25732	chr11	9383162	9383659	4.1011	2.22303	93.8065	3.5e-22	1.4e-20	CD4_8hr_vs_unstim	up
OCR_78360	chr2	9892557	9893096	3.26456	3.00784	93.7622	3.58e-22	1.43e-20	CD4_8hr_vs_unstim	up
OCR_85631	chr2	136705869	136706957	3.44958	2.92847	93.7573	3.59e-22	1.43e-20	CD4_8hr_vs_unstim	up
OCR_180539	chrX	147363436	147363830	3.84091	2.67525	93.7367	3.63e-22	1.44e-20	CD4_8hr_vs_unstim	up
OCR_138341	chr6	5667887	5668489	-2.71013	3.36417	93.7008	3.7e-22	1.47e-20	CD4_8hr_vs_unstim	down
OCR_11426	chr1	186268771	186269056	4.09436	2.2808	93.6966	3.7e-22	1.47e-20	CD4_8hr_vs_unstim	up
OCR_12531	chr1	193669894	193670589	3.0801	3.64926	93.6698	3.76e-22	1.49e-20	CD4_8hr_vs_unstim	up
OCR_30248	chr11	88546334	88547079	3.00169	3.99363	93.6282	3.84e-22	1.52e-20	CD4_8hr_vs_unstim	up
OCR_10388	chr1	169332626	169332967	3.14559	3.32671	93.6199	3.85e-22	1.53e-20	CD4_8hr_vs_unstim	up
OCR_175257	chr9	110005882	110006646	2.97764	3.94444	93.6117	3.87e-22	1.53e-20	CD4_8hr_vs_unstim	up
OCR_122940	chr4	120159085	120159848	3.2271	4.22598	93.5863	3.92e-22	1.55e-20	CD4_8hr_vs_unstim	up
OCR_17108	chr10	6051152	6051870	6.37608	1.90707	93.539	4.01e-22	1.59e-20	CD4_8hr_vs_unstim	up
OCR_138690	chr6	11460102	11460803	3.56871	3.03771	93.5254	4.04e-22	1.6e-20	CD4_8hr_vs_unstim	up
OCR_78443	chr2	10795436	10796002	4.26189	2.18852	93.5183	4.05e-22	1.6e-20	CD4_8hr_vs_unstim	up
OCR_126123	chr4	170548057	170548457	3.55476	2.90504	93.5134	4.06e-22	1.61e-20	CD4_8hr_vs_unstim	up
OCR_122474	chr4	114651558	114652358	3.39791	3.36339	93.5079	4.08e-22	1.61e-20	CD4_8hr_vs_unstim	up
OCR_137761	chr5	176328604	176329168	4.03434	2.74049	93.5079	4.08e-22	1.61e-20	CD4_8hr_vs_unstim	up
OCR_13360	chr1	198852335	198852760	3.5311	2.64239	93.4813	4.13e-22	1.63e-20	CD4_8hr_vs_unstim	up
OCR_53903	chr14	66345940	66346482	3.79378	2.4568	93.4662	4.16e-22	1.64e-20	CD4_8hr_vs_unstim	up
OCR_34115	chr12	12111236	12112030	3.63279	2.8045	93.4543	4.19e-22	1.65e-20	CD4_8hr_vs_unstim	up
OCR_78283	chr2	8548867	8549621	3.50002	3.57928	93.4453	4.21e-22	1.66e-20	CD4_8hr_vs_unstim	up
OCR_13894	chr1	205569076	205569835	3.77382	2.81778	93.4439	4.21e-22	1.66e-20	CD4_8hr_vs_unstim	up
OCR_11429	chr1	186272993	186273676	-2.50115	4.08216	93.361	4.39e-22	1.73e-20	CD4_8hr_vs_unstim	down
OCR_19188	chr10	33665764	33666915	3.63431	2.69131	93.3563	4.4e-22	1.73e-20	CD4_8hr_vs_unstim	up
OCR_95626	chr20	2198546	2199389	3.50945	2.88242	93.3499	4.41e-22	1.74e-20	CD4_8hr_vs_unstim	up
OCR_127500	chr5	6829210	6830054	3.86154	3.38523	93.3213	4.48e-22	1.76e-20	CD4_8hr_vs_unstim	up
OCR_138691	chr6	11460983	11461413	3.60536	3.21005	93.3058	4.51e-22	1.77e-20	CD4_8hr_vs_unstim	up
OCR_33677	chr12	6889618	6890152	3.48835	2.91646	93.3006	4.53e-22	1.78e-20	CD4_8hr_vs_unstim	up
OCR_87992	chr2	161150830	161151166	3.62061	2.569	93.2948	4.54e-22	1.78e-20	CD4_8hr_vs_unstim	up
OCR_131263	chr5	65624941	65625413	4.44802	2.48077	93.2913	4.55e-22	1.78e-20	CD4_8hr_vs_unstim	up
OCR_105322	chr3	43388436	43389264	-3.12408	2.28107	93.2369	4.67e-22	1.83e-20	CD4_8hr_vs_unstim	down
OCR_48594	chr13	80079574	80080092	4.18112	2.38247	93.2246	4.7e-22	1.84e-20	CD4_8hr_vs_unstim	up
OCR_164772	chr8	54926312	54927259	3.11989	3.7481	93.2001	4.76e-22	1.86e-20	CD4_8hr_vs_unstim	up
OCR_97768	chr20	51693862	51694886	3.65471	2.77102	93.1764	4.82e-22	1.89e-20	CD4_8hr_vs_unstim	up
OCR_162438	chr7	157263690	157265290	-2.49031	4.23596	93.1656	4.84e-22	1.9e-20	CD4_8hr_vs_unstim	down
OCR_79214	chr2	25780913	25781584	2.92238	3.47592	93.1555	4.87e-22	1.9e-20	CD4_8hr_vs_unstim	up
OCR_30205	chr11	88096699	88097475	2.95508	3.73387	93.1536	4.88e-22	1.91e-20	CD4_8hr_vs_unstim	up
OCR_106671	chr3	71442237	71442619	4.51598	2.31192	93.1303	4.93e-22	1.93e-20	CD4_8hr_vs_unstim	up
OCR_46336	chr13	49458052	49459057	2.7277	4.30264	93.129	4.94e-22	1.93e-20	CD4_8hr_vs_unstim	up
OCR_100046	chr21	30637814	30638793	3.35632	2.97541	93.09	5.03e-22	1.96e-20	CD4_8hr_vs_unstim	up
OCR_57379	chr15	52154802	52155112	4.92715	2.07001	93.0841	5.05e-22	1.97e-20	CD4_8hr_vs_unstim	up
OCR_136107	chr5	141395166	141396477	2.27494	5.13891	93.0751	5.07e-22	1.98e-20	CD4_8hr_vs_unstim	up
OCR_76638	chr19	42049961	42050305	5.27828	1.76086	93.0621	5.1e-22	1.99e-20	CD4_8hr_vs_unstim	up
OCR_62022	chr16	58766103	58767020	3.31654	3.71177	93.0162	5.22e-22	2.03e-20	CD4_8hr_vs_unstim	up
OCR_61551	chr16	48191571	48192055	5.64916	2.21539	93.0056	5.25e-22	2.04e-20	CD4_8hr_vs_unstim	up
OCR_24668	chr10	121441468	121442119	3.42782	2.77577	92.9948	5.28e-22	2.05e-20	CD4_8hr_vs_unstim	up
OCR_65982	chr17	39559833	39560816	3.53194	2.69379	92.9949	5.28e-22	2.05e-20	CD4_8hr_vs_unstim	up
OCR_69065	chr17	76248144	76248927	-2.41376	4.42177	92.982	5.32e-22	2.07e-20	CD4_8hr_vs_unstim	down
OCR_172742	chr9	31259799	31260717	-2.05844	5.48157	92.9753	5.33e-22	2.07e-20	CD4_8hr_vs_unstim	down
OCR_115400	chr3	188470743	188471399	4.17623	2.60233	92.9406	5.43e-22	2.11e-20	CD4_8hr_vs_unstim	up
OCR_53333	chr14	55852777	55853516	3.39605	3.25399	92.881	5.59e-22	2.17e-20	CD4_8hr_vs_unstim	up
OCR_83860	chr2	102977454	102977830	4.68233	1.98347	92.8705	5.62e-22	2.18e-20	CD4_8hr_vs_unstim	up
OCR_17421	chr10	9139414	9139977	-2.65953	3.4047	92.8625	5.65e-22	2.19e-20	CD4_8hr_vs_unstim	down
OCR_65152	chr17	27950819	27952060	2.70514	4.06342	92.8613	5.65e-22	2.19e-20	CD4_8hr_vs_unstim	up
OCR_72000	chr18	55333275	55334393	2.88304	3.80075	92.8466	5.69e-22	2.2e-20	CD4_8hr_vs_unstim	up
OCR_175954	chr9	128463058	128463466	4.93674	2.35911	92.84	5.71e-22	2.21e-20	CD4_8hr_vs_unstim	up
OCR_28421	chr11	58919735	58920518	4.03906	3.57445	92.836	5.72e-22	2.21e-20	CD4_8hr_vs_unstim	up
OCR_96878	chr20	33479423	33479824	5.32996	1.64045	92.8338	5.73e-22	2.22e-20	CD4_8hr_vs_unstim	up
OCR_39373	chr12	68550976	68551646	3.37843	3.12471	92.8287	5.74e-22	2.22e-20	CD4_8hr_vs_unstim	up
OCR_102564	chr22	42238901	42239438	4.19758	2.3272	92.818	5.77e-22	2.23e-20	CD4_8hr_vs_unstim	up
OCR_55529	chr14	98648257	98649469	2.91388	3.46402	92.7616	5.94e-22	2.29e-20	CD4_8hr_vs_unstim	up
OCR_120344	chr4	82313332	82313904	-3.49117	1.7849	92.7589	5.95e-22	2.3e-20	CD4_8hr_vs_unstim	down
OCR_147049	chr6	119057369	119058267	3.32726	3.17237	92.7512	5.97e-22	2.3e-20	CD4_8hr_vs_unstim	up
OCR_53117	chr14	52372181	52372995	2.52473	4.58156	92.7167	6.08e-22	2.34e-20	CD4_8hr_vs_unstim	up
OCR_167249	chr8	90901448	90902049	3.85723	2.55497	92.667	6.23e-22	2.4e-20	CD4_8hr_vs_unstim	up
OCR_68865	chr17	74267835	74269396	2.20686	5.30671	92.6696	6.24e-22	2.4e-20	CD4_8hr_vs_unstim	up
OCR_51743	chr14	31089421	31089743	3.56871	3.18135	92.6206	6.38e-22	2.46e-20	CD4_8hr_vs_unstim	up
OCR_126100	chr4	170146541	170147572	3.79486	3.13322	92.605	6.43e-22	2.47e-20	CD4_8hr_vs_unstim	up
OCR_81528	chr2	61099548	61100139	3.97584	2.90448	92.5958	6.46e-22	2.48e-20	CD4_8hr_vs_unstim	up
OCR_15345	chr1	226844256	226844674	-2.56999	3.7694	92.5418	6.64e-22	2.55e-20	CD4_8hr_vs_unstim	down
OCR_51099	chr14	21732239	21732627	2.96615	3.68062	92.53	6.68e-22	2.57e-20	CD4_8hr_vs_unstim	up
OCR_22750	chr10	90041681	90042715	3.05704	3.15482	92.5254	6.69e-22	2.57e-20	CD4_8hr_vs_unstim	up
OCR_138712	chr6	11732152	11732818	2.83568	3.93986	92.5291	6.69e-22	2.57e-20	CD4_8hr_vs_unstim	up
OCR_146452	chr6	112145047	112145563	2.84682	3.91805	92.4962	6.79e-22	2.61e-20	CD4_8hr_vs_unstim	up
OCR_11091	chr1	181293847	181294738	2.75212	4.12935	92.4853	6.83e-22	2.62e-20	CD4_8hr_vs_unstim	up
OCR_87809	chr2	158754999	158755407	2.4223	4.7987	92.4804	6.85e-22	2.62e-20	CD4_8hr_vs_unstim	up
OCR_120266	chr4	81075323	81076076	3.1125	3.23543	92.4795	6.85e-22	2.62e-20	CD4_8hr_vs_unstim	up
OCR_8541	chr1	117080887	117081761	3.16058	3.27138	92.4695	6.89e-22	2.64e-20	CD4_8hr_vs_unstim	up
[truncated: 62,312 more rows]
