# Supplementary material for: Dynamic chromatin architecture identifies new autoimmune-associated enhancers for IL2 and novel genes regulating CD4+ T cell activation
Source: eLife. 2024 Sep 20;13:RP96852. doi: 10.7554/eLife.96852 (PMC11418197; doi:10.7554/eLife.96852)
Supplement: Supplementary file 6. [file elife-96852-supp6.xlsx]

## Sheet: SupTab_06_ab_compartment
chrom	start	end	weight	GC	E1	E2	E3		Table S6: A/B compartment calls
chr1	0	40000	NA	0.526967	NA	NA	NA
chr1	40000	80000	NA	0.358675	NA	NA	NA
chr1	80000	120000	NA	0.3898	NA	NA	NA
chr1	120000	160000	NA	0.4595	NA	NA	NA
chr1	160000	200000	NA	0.450192	NA	NA	NA
chr1	200000	240000	NA	0.402766	NA	NA	NA
chr1	240000	280000	NA	0.386305	NA	NA	NA
chr1	280000	320000	NA	0.45068	NA	NA	NA
chr1	320000	360000	NA	0.421625	NA	NA	NA
chr1	360000	400000	NA	0.3797	NA	NA	NA
chr1	400000	440000	NA	0.44275	NA	NA	NA
chr1	440000	480000	NA	0.467706	NA	NA	NA
chr1	480000	520000	NA	NA	NA	NA	NA
chr1	520000	560000	NA	0.501631	NA	NA	NA
chr1	560000	600000	NA	0.39495	NA	NA	NA
chr1	600000	640000	NA	0.38705	NA	NA	NA
chr1	640000	680000	NA	0.439675	NA	NA	NA
chr1	680000	720000	NA	0.445575	NA	NA	NA
chr1	720000	760000	NA	0.41555	NA	NA	NA
chr1	760000	800000	NA	0.46305	NA	NA	NA
chr1	800000	840000	NA	0.460325	NA	NA	NA
chr1	840000	880000	0.00388944	0.643975	0.691721	-0.232982	0.522467
chr1	880000	920000	0.00374845	0.634775	0.695124	-0.278535	0.566686
chr1	920000	960000	0.00361607	0.5797	0.660886	-0.329715	0.606958
chr1	960000	1000000	0.00335671	0.6507	0.659373	-0.332338	0.633361
chr1	1000000	1040000	0.00417854	0.600875	0.679475	-0.306371	0.601093
chr1	1040000	1080000	0.00368399	0.596175	0.606507	-0.365578	0.652021
chr1	1080000	1120000	0.00353371	0.633525	0.684162	-0.348096	0.657096
chr1	1120000	1160000	0.00363757	0.592425	0.670374	-0.375372	0.628916
chr1	1160000	1200000	0.00347723	0.62	0.650894	-0.375973	0.652539
chr1	1200000	1240000	0.00363445	0.62105	0.608223	-0.374869	0.661269
chr1	1240000	1280000	0.00350251	0.64175	0.648167	-0.386454	0.711638
chr1	1280000	1320000	0.00411235	0.5998	0.677071	-0.366351	0.706597
chr1	1320000	1360000	0.00438344	0.528875	0.749114	-0.362831	0.737693
chr1	1360000	1400000	0.00429662	0.60135	0.752888	-0.322374	0.776049
chr1	1400000	1440000	NA	0.566575	NA	NA	NA
chr1	1440000	1480000	NA	0.603725	NA	NA	NA
chr1	1480000	1520000	0.0037073	0.52635	0.831988	-0.317648	0.789148
chr1	1520000	1560000	0.0041743	0.581075	0.874146	-0.33419	0.810454
chr1	1560000	1600000	NA	0.57545	NA	NA	NA
chr1	1600000	1640000	NA	0.567575	NA	NA	NA
chr1	1640000	1680000	NA	0.510375	NA	NA	NA
chr1	1680000	1720000	0.00375496	0.54165	0.911307	-0.240426	0.775445
chr1	1720000	1760000	0.00354139	0.464225	0.940395	-0.12146	0.73897
chr1	1760000	1800000	0.00371803	0.458625	0.940124	-0.109395	0.68116
chr1	1800000	1840000	0.00338717	0.52155	0.927312	-0.171243	0.719468
chr1	1840000	1880000	0.00348021	0.593375	0.830583	0.0699723	0.753821
chr1	1880000	1920000	0.0033819	0.57255	0.7983	0.35047	0.733678
chr1	1920000	1960000	0.00341107	0.5259	0.803134	0.383349	0.714594
chr1	1960000	2000000	0.00310905	0.57805	0.809782	0.245645	0.728985
chr1	2000000	2040000	0.00347717	0.5791	0.775631	0.373636	0.720183
chr1	2040000	2080000	0.00373252	0.5548	0.824653	0.241219	0.712392
chr1	2080000	2120000	0.003353	0.5657	0.803098	0.146844	0.714503
chr1	2120000	2160000	0.00308874	0.603525	0.842645	-0.0691456	0.682069
chr1	2160000	2200000	0.00338261	0.5521	0.947549	-0.0566115	0.626754
chr1	2200000	2240000	0.00364177	0.59955	0.942707	-0.0300417	0.639724
chr1	2240000	2280000	0.00328961	0.6332	0.830025	0.145278	0.63503
chr1	2280000	2320000	0.00328282	0.5401	0.752936	0.150402	0.642277
chr1	2320000	2360000	0.00308711	0.5726	0.765829	0.118846	0.662348
chr1	2360000	2400000	0.00316426	0.6437	0.712387	0.567614	0.657647
chr1	2400000	2440000	0.00326955	0.6495	0.753275	0.490952	0.680101
chr1	2440000	2480000	0.00334358	0.622775	0.838319	0.1015	0.660514
chr1	2480000	2520000	0.00391279	0.5893	0.884134	-0.0239611	0.639129
chr1	2520000	2560000	0.00382081	0.544475	0.82998	0.313722	0.645773
chr1	2560000	2600000	0.00465467	0.603025	0.763382	0.433732	0.62465
chr1	2600000	2640000	NA	0.621888	NA	NA	NA
chr1	2640000	2680000	NA	NA	NA	NA	NA
chr1	2680000	2720000	0.00449604	0.556596	0.573406	0.776029	0.586405
chr1	2720000	2760000	0.00324652	0.5608	0.552262	0.962267	0.593612
chr1	2760000	2800000	0.00334719	0.58425	0.517324	1.21822	0.581724
chr1	2800000	2840000	0.00324904	0.59745	0.468792	1.40688	0.577212
chr1	2840000	2880000	0.00334517	0.543575	0.368094	1.53285	0.555891
chr1	2880000	2920000	0.00328498	0.542425	0.328317	1.5576	0.543714
chr1	2920000	2960000	0.00302211	0.5596	0.335086	1.54554	0.537975
chr1	2960000	3000000	0.00312841	0.556875	0.368746	1.5596	0.496838
chr1	3000000	3040000	0.0033769	0.595825	0.295951	1.64483	0.51843
chr1	3040000	3080000	0.00316155	0.57315	0.283486	1.71749	0.505842
chr1	3080000	3120000	0.0033242	0.581925	0.250068	1.71881	0.516025
chr1	3120000	3160000	0.00315996	0.564825	0.247037	1.7188	0.517622
chr1	3160000	3200000	0.00334869	0.5614	0.247265	1.68354	0.508892
chr1	3200000	3240000	0.00321955	0.558875	0.29114	1.59722	0.502255
chr1	3240000	3280000	0.00324787	0.57885	0.272713	1.63521	0.526255
chr1	3280000	3320000	0.00343767	0.560975	0.2938	1.59227	0.501546
chr1	3320000	3360000	0.0031152	0.590575	0.373446	1.35457	0.473637
chr1	3360000	3400000	0.00300129	0.59265	0.51485	1.15202	0.440723
chr1	3400000	3440000	0.00333481	0.6148	0.614094	1.00028	0.406889
chr1	3440000	3480000	0.00298575	0.623175	0.686837	0.941009	0.37417
chr1	3480000	3520000	0.00359008	0.6223	0.708097	0.879559	0.328227
chr1	3520000	3560000	0.00290395	0.560125	0.804887	0.630899	0.329363
chr1	3560000	3600000	0.00321903	0.5543	0.791348	0.779612	0.303413
chr1	3600000	3640000	0.00314107	0.624	0.700056	0.982912	0.32693
chr1	3640000	3680000	0.00337922	0.55515	0.808239	0.798839	0.269123
chr1	3680000	3720000	0.00290276	0.5529	0.955535	0.661521	0.142735
chr1	3720000	3760000	0.00342956	0.486525	0.808897	0.905652	0.0285339
chr1	3760000	3800000	0.0032249	0.5007	0.833418	0.910723	-0.0487694
chr1	3800000	3840000	0.00317684	0.5266	0.608119	1.11652	-0.087197
chr1	3840000	3880000	NA	0.517464	NA	NA	NA
chr1	3880000	3920000	NA	NA	NA	NA	NA
chr1	3920000	3960000	NA	NA	NA	NA	NA
chr1	3960000	4000000	NA	0.46978	NA	NA	NA
chr1	4000000	4040000	0.00282544	0.511225	0.0530267	1.83006	0.12029
chr1	4040000	4080000	0.00327649	0.50435	-0.0594348	1.98733	0.12978
chr1	4080000	4120000	0.00326505	0.481075	-0.135864	2.02402	0.130944
chr1	4120000	4160000	0.0036369	0.507025	-0.179237	2.02963	0.168447
chr1	4160000	4200000	0.0031242	0.500425	-0.242773	2.02733	0.189005
chr1	4200000	4240000	0.00319787	0.516825	-0.281634	1.99212	0.162996
chr1	4240000	4280000	0.00347311	0.438725	-0.318797	2.01182	0.178896
chr1	4280000	4320000	0.00350045	0.4236	-0.366215	2.01311	0.15205
chr1	4320000	4360000	0.00343817	0.44765	-0.388533	1.98839	0.239894
chr1	4360000	4400000	0.00325741	0.509125	-0.400085	2.03563	0.214286
chr1	4400000	4440000	0.00317967	0.498	-0.368652	2.01125	0.198697
chr1	4440000	4480000	0.00308728	0.4563	-0.365905	1.99985	0.192204
chr1	4480000	4520000	0.00320357	0.465825	-0.367391	2.0263	0.16732
chr1	4520000	4560000	0.00332496	0.495575	-0.390356	2.03111	0.169585
chr1	4560000	4600000	0.00337684	0.47255	-0.387114	1.99061	0.130258
chr1	4600000	4640000	0.00338588	0.442675	-0.365062	1.97886	0.184174
chr1	4640000	4680000	0.00326099	0.491175	-0.321436	1.99884	0.118336
chr1	4680000	4720000	0.00327506	0.524325	-0.286077	1.97138	0.122493
chr1	4720000	4760000	0.00321798	0.5236	-0.294331	1.96121	0.115773
chr1	4760000	4800000	0.00335179	0.537925	-0.323467	1.99904	0.111298
chr1	4800000	4840000	0.0030222	0.514325	-0.391215	2.00672	0.130664
chr1	4840000	4880000	0.00317502	0.4402	-0.404232	1.97323	0.16044
chr1	4880000	4920000	0.00341106	0.4419	-0.425209	1.92703	0.14029
chr1	4920000	4960000	0.00374123	0.448375	-0.489786	1.94213	0.19068
chr1	4960000	5000000	0.00350137	0.46225	-0.490911	1.99053	0.17906
chr1	5000000	5040000	0.00319883	0.472325	-0.490429	1.95303	0.165115
chr1	5040000	5080000	0.00335068	0.4397	-0.529564	1.94611	0.157578
chr1	5080000	5120000	0.00368755	0.406225	-0.516171	1.90426	0.171725
chr1	5120000	5160000	0.00359858	0.3895	-0.516296	1.90795	0.164778
chr1	5160000	5200000	0.00340295	0.4313	-0.482293	1.90186	0.142723
chr1	5200000	5240000	0.003376	0.456525	-0.474325	1.94436	0.147917
chr1	5240000	5280000	0.00336057	0.409525	-0.485753	1.90481	0.131176
chr1	5280000	5320000	0.00329324	0.442625	-0.424144	1.88605	0.12036
chr1	5320000	5360000	0.00298866	0.494875	-0.376691	1.88323	0.103827
chr1	5360000	5400000	0.00339485	0.449075	-0.302262	1.84636	0.0713027
chr1	5400000	5440000	0.00309156	0.467325	-0.23544	1.8333	0.065423
chr1	5440000	5480000	0.00301541	0.490075	-0.158514	1.83169	0.029878
chr1	5480000	5520000	0.00318439	0.488925	-0.22428	1.88712	0.0335499
chr1	5520000	5560000	0.00333705	0.49425	-0.207728	1.86086	0.0848925
chr1	5560000	5600000	0.00327115	0.489275	-0.17068	1.82169	0.0661972
chr1	5600000	5640000	0.00330405	0.424275	-0.264356	1.91613	0.109806
chr1	5640000	5680000	0.00300145	0.447075	-0.253096	1.96251	0.145265
chr1	5680000	5720000	0.00338905	0.470575	-0.266706	1.97776	0.12825
chr1	5720000	5760000	0.00278353	0.490625	-0.305544	1.76635	0.187811
chr1	5760000	5800000	0.00334245	0.5027	-0.200857	1.99108	0.160339
chr1	5800000	5840000	0.00308755	0.524575	-0.197282	2.00987	0.117399
chr1	5840000	5880000	0.00363549	0.491625	-0.166521	2.03631	0.124341
chr1	5880000	5920000	0.00305918	0.549525	-0.0674819	1.9607	0.0674383
chr1	5920000	5960000	0.00314365	0.5387	0.103192	1.80403	0.0182265
chr1	5960000	6000000	0.00306027	0.471	0.241102	1.53458	-0.0665298
chr1	6000000	6040000	0.00314652	0.4955	0.434516	1.32722	-0.172748
chr1	6040000	6080000	0.00294653	0.54875	0.736747	0.917192	-0.295535
chr1	6080000	6120000	0.00292518	0.540975	0.63152	1.05884	-0.228123
chr1	6120000	6160000	0.00285144	0.564075	0.555133	1.17749	-0.123584
chr1	6160000	6200000	0.00304768	0.5539	0.723808	0.922549	-0.0589053
chr1	6200000	6240000	0.00328389	0.581575	0.829236	0.732373	-0.0486512
chr1	6240000	6280000	0.00322758	0.527225	0.996739	0.311873	0.0374043
chr1	6280000	6320000	0.00306762	0.55375	0.875264	0.284396	0.129652
chr1	6320000	6360000	0.0033389	0.574425	0.777338	0.63928	0.102934
chr1	6360000	6400000	0.00334754	0.536125	0.773405	0.652563	0.116823
chr1	6400000	6440000	0.00334474	0.533275	0.883699	0.342211	0.0777406
chr1	6440000	6480000	0.00346664	0.5109	0.916511	0.248014	0.0892586
chr1	6480000	6520000	0.00409003	0.600575	0.969637	0.199493	0.131127
chr1	6520000	6560000	0.00295544	0.597825	1.019	0.0978413	0.150677
chr1	6560000	6600000	0.00318275	0.52285	1.01104	0.226301	0.133762
chr1	6600000	6640000	0.00370112	0.511625	1.02311	0.148755	0.13246
chr1	6640000	6680000	0.00337276	0.552075	1.14445	0.0581106	0.11552
chr1	6680000	6720000	0.00332319	0.514075	0.944553	0.334817	0.0979284
chr1	6720000	6760000	0.00322282	0.441475	0.823627	0.57188	0.0612117
chr1	6760000	6800000	0.00323782	0.47945	0.626644	0.712049	0.0866971
chr1	6800000	6840000	0.00317041	0.457325	0.630848	0.774807	0.0184765
chr1	6840000	6880000	0.00321671	0.4348	0.70811	0.634524	-0.101672
chr1	6880000	6920000	0.00307824	0.40295	0.584529	0.83941	-0.065986
chr1	6920000	6960000	0.00303053	0.417125	0.521025	0.941683	-0.0288112
chr1	6960000	7000000	0.00319945	0.485375	0.395517	1.13785	-0.0138108
chr1	7000000	7040000	0.00336803	0.50435	0.483807	1.09302	-0.0336424
chr1	7040000	7080000	0.00329342	0.4791	0.329295	1.25385	0.0300935
chr1	7080000	7120000	0.0031292	0.476425	0.187118	1.38781	0.0941478
chr1	7120000	7160000	0.00292557	0.479675	0.119331	1.52126	0.144556
chr1	7160000	7200000	0.0034185	0.4715	0.0133579	1.71914	0.204152
chr1	7200000	7240000	0.0032205	0.470575	-0.00146855	1.69807	0.226984
chr1	7240000	7280000	0.00370701	0.408175	-0.0465027	1.69272	0.195164
chr1	7280000	7320000	0.0031812	0.47895	-0.0830536	1.79111	0.219838
chr1	7320000	7360000	0.00310429	0.439325	-0.144743	1.87738	0.234627
chr1	7360000	7400000	0.00323981	0.431175	-0.15935	1.92018	0.237656
chr1	7400000	7440000	0.00333609	0.505175	-0.126879	1.94804	0.243995
chr1	7440000	7480000	0.00392873	0.466975	-0.11911	1.94274	0.241442
chr1	7480000	7520000	0.00301871	0.548125	-0.0728884	1.96405	0.227899
chr1	7520000	7560000	0.00344201	0.537625	-0.0119969	1.90937	0.235133
chr1	7560000	7600000	0.00319625	0.53525	0.0585684	1.83637	0.20797
chr1	7600000	7640000	0.00313877	0.5185	0.144062	1.69842	0.178651
chr1	7640000	7680000	0.00373893	0.521175	0.15846	1.65718	0.184425
chr1	7680000	7720000	0.00303356	0.5469	0.303461	1.35424	0.171585
chr1	7720000	7760000	0.00290229	0.558975	0.558015	0.923965	0.0665448
chr1	7760000	7800000	0.00318052	0.466075	0.610655	0.889642	0.0423583
chr1	7800000	7840000	0.00334913	0.4061	0.710755	0.613373	0.00053414
chr1	7840000	7880000	0.0033279	0.422625	0.78069	0.395276	0.0934274
chr1	7880000	7920000	0.00331547	0.412125	0.72815	0.485611	0.060335
chr1	7920000	7960000	0.00342689	0.45615	0.745644	0.418783	0.0882667
chr1	7960000	8000000	0.00323891	0.4455	0.879918	0.137544	0.0647422
chr1	8000000	8040000	0.00330122	0.456375	0.926764	-0.0101242	0.0807129
chr1	8040000	8080000	0.00307959	0.449825	0.744924	0.0411004	0.178989
chr1	8080000	8120000	0.00337119	0.429625	0.634771	0.152548	0.213893
chr1	8120000	8160000	0.00344596	0.432275	0.660102	0.310296	0.121492
chr1	8160000	8200000	0.00338252	0.4463	0.661713	0.31818	0.128551
chr1	8200000	8240000	0.00329669	0.469075	0.699317	0.267916	0.103253
chr1	8240000	8280000	0.00323152	0.480275	0.650022	0.355761	0.146581
chr1	8280000	8320000	0.00333459	0.479175	0.623652	0.411619	0.146015
chr1	8320000	8360000	0.00365995	0.46105	0.614853	0.347065	0.148966
chr1	8360000	8400000	0.00322233	0.498525	0.654073	0.150559	0.190391
chr1	8400000	8440000	0.00312249	0.53155	0.720007	-0.0365353	0.210602
chr1	8440000	8480000	0.00335479	0.4252	0.832446	-0.178851	0.139228
chr1	8480000	8520000	0.00338392	0.446425	0.840978	-0.200889	0.151164
chr1	8520000	8560000	0.00349462	0.408925	0.860194	-0.227316	0.117963
chr1	8560000	8600000	0.0034824	0.42675	0.855655	-0.239605	0.144659
chr1	8600000	8640000	0.00331885	0.390225	0.725524	-0.242759	0.18199
chr1	8640000	8680000	0.00359926	0.404325	0.845464	-0.243217	0.136801
chr1	8680000	8720000	0.00373796	0.397275	0.862831	-0.210131	0.119343
chr1	8720000	8760000	0.00330229	0.399575	0.812251	-0.222509	0.131406
chr1	8760000	8800000	0.00333427	0.413425	0.738429	-0.207223	0.204823
chr1	8800000	8840000	0.00348273	0.4004	0.811435	-0.153934	0.194021
chr1	8840000	8880000	0.00339472	0.428525	0.846113	-0.163268	0.235411
chr1	8880000	8920000	0.00343949	0.4736	0.768242	-0.228354	0.302904
chr1	8920000	8960000	0.00336118	0.490025	0.905508	-0.264827	0.296106
chr1	8960000	9000000	0.0034484	0.470175	0.851147	-0.222606	0.3551
chr1	9000000	9040000	0.00372105	0.48085	0.94673	-0.220346	0.290922
chr1	9040000	9080000	0.00328556	0.498275	0.77115	-0.126274	0.387343
chr1	9080000	9120000	0.00327935	0.48535	0.735654	0.0798534	0.446876
chr1	9120000	9160000	0.00350114	0.476275	0.741565	0.134208	0.441494
chr1	9160000	9200000	0.00315778	0.49675	0.745303	0.0228535	0.441366
chr1	9200000	9240000	0.00342087	0.50105	0.744396	0.0803108	0.44517
chr1	9240000	9280000	0.00316881	0.50915	0.719078	0.0546549	0.430356
chr1	9280000	9320000	0.00305666	0.50215	0.752968	-0.027428	0.494755
chr1	9320000	9360000	0.0031434	0.52825	0.679092	-0.0831125	0.448552
chr1	9360000	9400000	0.00312207	0.540725	0.710041	0.0274178	0.44622
chr1	9400000	9440000	0.00341362	0.542875	0.734441	0.110716	0.413296
chr1	9440000	9480000	0.00345715	0.5266	0.762899	0.022229	0.415975
chr1	9480000	9520000	0.00334938	0.49175	0.726919	-0.068326	0.440985
chr1	9520000	9560000	0.00353698	0.497375	0.662852	-0.036232	0.489965
chr1	9560000	9600000	0.00355062	0.491025	0.738019	-0.0753106	0.50232
chr1	9600000	9640000	0.00346698	0.452975	0.776879	-0.120092	0.530422
chr1	9640000	9680000	0.00322885	0.557875	0.785681	-0.192536	0.547512
chr1	9680000	9720000	0.00343771	0.515525	0.870268	-0.328243	0.494792
chr1	9720000	9760000	0.00323567	0.496225	0.944357	-0.319947	0.44803
chr1	9760000	9800000	0.00344565	0.53185	0.831505	-0.314192	0.531695
chr1	9800000	9840000	0.00345703	0.47245	0.745374	-0.239649	0.53393
chr1	9840000	9880000	0.00339557	0.4547	0.791729	-0.244474	0.463311
chr1	9880000	9920000	0.00334959	0.517975	0.771668	-0.205251	0.470286
chr1	9920000	9960000	0.00313906	0.51785	0.674154	-0.208381	0.507732
chr1	9960000	10000000	0.00345164	0.463375	0.764095	-0.184583	0.513883
chr1	10000000	10040000	0.00335215	0.462	0.702491	-0.0826268	0.484154
chr1	10040000	10080000	0.00346461	0.478975	0.706676	-0.0342453	0.475101
chr1	10080000	10120000	0.00316938	0.466225	0.717721	-0.068627	0.474411
chr1	10120000	10160000	0.00324436	0.433725	0.715228	-0.0109188	0.478778
chr1	10160000	10200000	0.00341678	0.425925	0.681472	0.013548	0.438765
chr1	10200000	10240000	0.00363399	0.44965	0.674353	0.017758	0.438346
chr1	10240000	10280000	0.00367368	0.45795	0.720842	-0.0181013	0.421549
chr1	10280000	10320000	0.00338985	0.426125	0.707724	0.0228658	0.43205
chr1	10320000	10360000	0.00365777	0.3956	0.731132	0.0333195	0.428743
chr1	10360000	10400000	0.00345574	0.413025	0.674784	0.0527696	0.443505
chr1	10400000	10440000	0.00331478	0.4364	0.683753	0.0200558	0.44468
chr1	10440000	10480000	0.00323338	0.471475	0.706315	-0.0760803	0.471253
chr1	10480000	10520000	0.00327464	0.483575	0.716454	-0.0892183	0.498406
chr1	10520000	10560000	0.00313338	0.47315	0.724725	-0.101786	0.495628
chr1	10560000	10600000	0.00321759	0.445575	0.68832	-0.00802488	0.433648
chr1	10600000	10640000	0.00358454	0.4223	0.681141	0.10356	0.432649
chr1	10640000	10680000	0.00316094	0.44635	0.663697	0.185746	0.43373
chr1	10680000	10720000	0.00322402	0.592825	0.646456	0.194038	0.445594
chr1	10720000	10760000	0.00287689	0.592225	0.677996	0.12628	0.467885
chr1	10760000	10800000	0.00319061	0.558575	0.666428	0.179811	0.460155
chr1	10800000	10840000	0.00313372	0.540775	0.634081	0.256472	0.448153
chr1	10840000	10880000	0.00325557	0.52165	0.633161	0.245762	0.476867
chr1	10880000	10920000	0.00319298	0.52855	0.606327	0.225163	0.492819
chr1	10920000	10960000	0.00311447	0.515075	0.63016	0.146529	0.496695
chr1	10960000	11000000	0.00324712	0.51915	0.684026	0.0796579	0.495793
chr1	11000000	11040000	0.00294706	0.52735	0.66619	0.0863595	0.531661
chr1	11040000	11080000	0.00329438	0.475425	0.735204	0.0395482	0.544942
chr1	11080000	11120000	0.00345323	0.5025	0.767437	-0.108507	0.603174
chr1	11120000	11160000	0.00349719	0.470925	0.836276	-0.110291	0.548252
chr1	11160000	11200000	0.00325008	0.45895	0.783563	-0.00371852	0.525123
chr1	11200000	11240000	0.00375167	0.445925	0.746875	0.096263	0.516153
chr1	11240000	11280000	0.00330888	0.436825	0.74584	0.058742	0.535613
chr1	11280000	11320000	0.00349429	0.442725	0.732217	0.00674898	0.534725
chr1	11320000	11360000	0.00320287	0.479975	0.806241	0.0050558	0.485137
chr1	11360000	11400000	0.00324379	0.524825	0.652637	0.209102	0.494291
chr1	11400000	11440000	0.00338755	0.5044	0.633742	0.290956	0.481073
chr1	11440000	11480000	0.0032924	0.484675	0.648833	0.374109	0.464033
chr1	11480000	11520000	0.00313822	0.519975	0.607492	0.470591	0.493361
chr1	11520000	11560000	0.00333974	0.520125	0.59986	0.487076	0.467506
chr1	11560000	11600000	0.00317177	0.528925	0.579357	0.593743	0.504286
chr1	11600000	11640000	0.00337044	0.4983	0.58592	0.58286	0.520496
chr1	11640000	11680000	0.00323121	0.5008	0.591966	0.457621	0.508924
chr1	11680000	11720000	0.00318747	0.5308	0.654478	0.110559	0.525992
chr1	11720000	11760000	0.0033079	0.5455	0.849851	0.00453517	0.554747
chr1	11760000	11800000	0.00309492	0.52355	0.838295	0.0203504	0.550336
chr1	11800000	11840000	0.00326731	0.536775	0.825634	0.131403	0.541778
chr1	11840000	11880000	0.00313381	0.5089	0.863576	0.0990701	0.556841
chr1	11880000	11920000	0.00329904	0.50515	0.832714	0.184446	0.516125
chr1	11920000	11960000	0.00349383	0.516375	0.839524	0.228341	0.526148
chr1	11960000	12000000	0.0034897	0.5114	0.938667	-0.0152921	0.50006
chr1	12000000	12040000	0.00336929	0.528375	0.914408	0.13218	0.46697
chr1	12040000	12080000	0.00337064	0.5097	0.918605	0.0614123	0.411086
chr1	12080000	12120000	0.00330342	0.532825	0.929669	0.10987	0.341423
chr1	12120000	12160000	0.00359013	0.495375	0.889594	0.136828	0.280108
chr1	12160000	12200000	0.00319346	0.503325	0.84206	0.0421975	0.235266
chr1	12200000	12240000	0.00316854	0.537775	1.05265	-0.119481	0.121584
chr1	12240000	12280000	0.00325831	0.537775	0.919065	0.0543187	0.165268
chr1	12280000	12320000	0.00320903	0.4524	0.815124	0.23138	0.116063
chr1	12320000	12360000	0.00340403	0.409075	0.722919	0.33514	0.0540715
chr1	12360000	12400000	0.00333555	0.418175	0.713258	0.248465	0.0310221
chr1	12400000	12440000	0.00371853	0.400675	0.819672	0.128916	-0.0617263
chr1	12440000	12480000	0.00343437	0.415175	0.846919	0.0566348	-0.102566
chr1	12480000	12520000	0.00314203	0.424225	0.898604	-0.0419384	-0.0747737
chr1	12520000	12560000	0.00343606	0.439675	0.895003	0.0132124	-0.0965931
chr1	12560000	12600000	0.00329411	0.472275	0.879963	0.0418868	-0.0910789
chr1	12600000	12640000	0.00331248	0.522975	0.837824	0.184136	-0.109443
chr1	12640000	12680000	0.00336175	0.5185	0.807453	0.103934	-0.0569991
chr1	12680000	12720000	0.00303239	0.484625	0.65488	0.429817	-0.0241121
chr1	12720000	12760000	0.00338759	0.438775	0.537717	1.06481	-0.0510574
chr1	12760000	12800000	0.00400417	0.43225	0.32411	1.64129	-0.0735071
chr1	12800000	12840000	0.00347043	0.448725	0.139286	1.91374	-0.0428029
chr1	12840000	12880000	NA	0.442525	NA	NA	NA
chr1	12880000	12920000	NA	0.448375	NA	NA	NA
chr1	12920000	12960000	NA	0.448725	NA	NA	NA
chr1	12960000	13000000	NA	0.46715	NA	NA	NA
chr1	13000000	13040000	NA	0.465475	NA	NA	NA
chr1	13040000	13080000	NA	0.424835	NA	NA	NA
chr1	13080000	13120000	NA	0.461005	NA	NA	NA
chr1	13120000	13160000	NA	0.466425	NA	NA	NA
chr1	13160000	13200000	NA	0.44825	NA	NA	NA
chr1	13200000	13240000	NA	0.475141	NA	NA	NA
chr1	13240000	13280000	NA	NA	NA	NA	NA
chr1	13280000	13320000	NA	0.465909	NA	NA	NA
chr1	13320000	13360000	NA	0.452475	NA	NA	NA
chr1	13360000	13400000	NA	0.469925	NA	NA	NA
chr1	13400000	13440000	NA	0.4655	NA	NA	NA
chr1	13440000	13480000	NA	0.455525	NA	NA	NA
chr1	13480000	13520000	NA	0.455425	NA	NA	NA
chr1	13520000	13560000	NA	0.484823	NA	NA	NA
chr1	13560000	13600000	NA	NA	NA	NA	NA
chr1	13600000	13640000	NA	0.458036	NA	NA	NA
chr1	13640000	13680000	NA	0.468275	NA	NA	NA
chr1	13680000	13720000	NA	0.4612	NA	NA	NA
chr1	13720000	13760000	NA	0.462875	NA	NA	NA
chr1	13760000	13800000	NA	0.48635	NA	NA	NA
chr1	13800000	13840000	0.00337465	0.4968	-0.34326	2.09415	-0.0761378
chr1	13840000	13880000	0.00359784	0.47525	-0.330413	2.03902	-0.104509
chr1	13880000	13920000	0.00398581	0.455425	-0.325318	1.98134	-0.0922395
chr1	13920000	13960000	0.00333309	0.452125	-0.232783	1.85968	-0.14905
chr1	13960000	14000000	0.00338321	0.43775	-0.00381839	1.41808	-0.271213
chr1	14000000	14040000	0.00347055	0.41555	0.424825	0.905831	-0.653762
chr1	14040000	14080000	0.00354534	0.4015	0.698938	0.672933	-0.884301
chr1	14080000	14120000	0.00322917	0.423	0.532823	0.903259	-0.78433
chr1	14120000	14160000	0.00298359	0.50075	0.163216	1.23236	-0.514867
chr1	14160000	14200000	0.0033817	0.41575	-0.1553	1.63233	-0.251025
chr1	14200000	14240000	0.00324046	0.451325	-0.257186	1.8077	-0.131104
chr1	14240000	14280000	0.00344736	0.43	-0.294744	1.74922	-0.0631225
chr1	14280000	14320000	0.00361757	0.425875	-0.373302	1.77313	0.000381147
chr1	14320000	14360000	0.00365175	0.4129	-0.482486	1.88473	0.0807898
chr1	14360000	14400000	0.00355158	0.43915	-0.552278	1.95265	0.125612
chr1	14400000	14440000	0.00342329	0.4264	-0.548914	1.90437	0.142087
chr1	14440000	14480000	0.0033355	0.44055	-0.530238	1.84273	0.135422
chr1	14480000	14520000	0.00350869	0.417425	-0.537332	1.82563	0.128041
chr1	14520000	14560000	0.00338798	0.3975	-0.550999	1.80492	0.120042
chr1	14560000	14600000	0.0034853	0.4212	-0.498698	1.80909	0.0605395
chr1	14600000	14640000	0.00336532	0.431125	-0.450227	1.76402	0.0296044
chr1	14640000	14680000	0.003728	0.409875	-0.383901	1.67718	-0.0211965
chr1	14680000	14720000	0.00367485	0.422375	-0.48138	1.75958	0.0695173
chr1	14720000	14760000	0.00320091	0.4264	-0.472089	1.77086	0.114891
chr1	14760000	14800000	0.00337906	0.44435	-0.478103	1.84615	0.114099
chr1	14800000	14840000	0.00332052	0.4251	-0.469634	1.85763	0.104201
chr1	14840000	14880000	0.00331223	0.441975	-0.448875	1.83281	0.108395
chr1	14880000	14920000	0.00326245	0.444725	-0.443775	1.88679	0.133565
chr1	14920000	14960000	0.00336178	0.4567	-0.416609	1.876	0.102855
chr1	14960000	15000000	0.00348483	0.46005	-0.419364	1.88733	0.12336
chr1	15000000	15040000	0.00317419	0.4679	-0.392085	1.89029	0.132117
chr1	15040000	15080000	0.00316226	0.473325	-0.336	1.89283	0.137453
chr1	15080000	15120000	0.00315096	0.4805	-0.282323	1.8404	0.119149
chr1	15120000	15160000	0.00299555	0.486875	-0.241436	1.86286	0.126184
chr1	15160000	15200000	0.00325402	0.4823	-0.229432	1.88088	0.0880063
chr1	15200000	15240000	0.00319498	0.484125	-0.135616	1.78078	0.00867552
chr1	15240000	15280000	0.00304336	0.522675	-0.0394017	1.68198	-0.0444208
chr1	15280000	15320000	0.00322568	0.511775	-0.0230248	1.74188	-0.00222057
chr1	15320000	15360000	0.00317356	0.517225	-0.0195781	1.69901	0.0299221
chr1	15360000	15400000	0.00337155	0.522575	0.0688689	1.59142	0.0262632
chr1	15400000	15440000	0.00316316	0.50175	0.174689	1.45898	-0.0159424
chr1	15440000	15480000	0.00319635	0.49425	0.338279	1.04569	-0.00960732
chr1	15480000	15520000	0.00351725	0.487225	0.428013	1.02147	-0.0769092
chr1	15520000	15560000	0.00338404	0.468975	0.517952	0.946843	-0.15334
chr1	15560000	15600000	0.00344232	0.4459	0.570267	0.79419	-0.14991
chr1	15600000	15640000	0.00314746	0.47275	0.414179	0.923287	0.0385659
chr1	15640000	15680000	0.00338835	0.4817	0.524377	0.864768	0.00789582
chr1	15680000	15720000	0.00322968	0.4946	0.616708	0.882873	-0.0751536
chr1	15720000	15760000	0.00291093	0.53105	0.709427	0.642188	-0.0531851
chr1	15760000	15800000	0.00346007	0.4961	0.592534	0.900621	0.054776
chr1	15800000	15840000	0.00362784	0.48635	0.740485	0.705676	0.0355086
chr1	15840000	15880000	0.00317503	0.44575	0.971045	0.228736	0.0793432
chr1	15880000	15920000	0.00340096	0.46195	0.995219	0.0832427	0.203308
chr1	15920000	15960000	0.00331921	0.44955	0.991586	-0.00818919	0.231583
chr1	15960000	16000000	0.0034353	0.428575	0.952231	0.0751203	0.257888
chr1	16000000	16040000	0.00339397	0.49055	0.959816	0.0445142	0.268159
chr1	16040000	16080000	0.00308443	0.572375	0.893481	0.0704098	0.348154
chr1	16080000	16120000	0.00346414	0.5285	0.799821	0.017774	0.397223
chr1	16120000	16160000	0.00378315	0.479775	0.768971	-0.190587	0.357974
chr1	16160000	16200000	0.00357726	0.4582	0.975638	-0.253224	0.228924
chr1	16200000	16240000	0.00353297	0.4081	0.954821	-0.194888	0.21192
chr1	16240000	16280000	0.00338988	0.49715	0.946925	-0.218492	0.214554
chr1	16280000	16320000	0.00333063	0.475825	0.962694	-0.266731	0.271042
chr1	16320000	16360000	0.00334469	0.558775	0.836905	-0.152684	0.392178
chr1	16360000	16400000	0.0038341	0.585225	0.770886	-0.082895	0.413018
chr1	16400000	16440000	0.00346619	0.520125	0.787487	0.00045242	0.430779
chr1	16440000	16480000	0.00340735	0.56265	0.882152	0.0645845	0.385661
chr1	16480000	16520000	0.00326398	0.5431	0.833777	-0.0834977	0.369951
chr1	16520000	16560000	0.00302312	0.54595	0.912352	-0.108103	0.439844
chr1	16560000	16600000	0.00327137	0.4598	0.888704	-0.0486324	0.405246
chr1	16600000	16640000	0.00339869	0.4411	0.910296	0.0183342	0.420525
chr1	16640000	16680000	0.00360491	0.4429	0.922134	-0.0278856	0.414643
chr1	16680000	16720000	0.0036014	0.4757	0.958558	-0.0841028	0.460636
chr1	16720000	16760000	0.00367325	0.511975	1.00207	0.0154071	0.432424
chr1	16760000	16800000	0.00399056	0.471775	0.965667	0.0149477	0.485671
chr1	16800000	16840000	NA	0.510525	NA	NA	NA
chr1	16840000	16880000	NA	0.46125	NA	NA	NA
chr1	16880000	16920000	NA	0.442725	NA	NA	NA
chr1	16920000	16960000	0.00222422	0.483325	0.883507	0.181488	0.434409
chr1	16960000	17000000	NA	0.47755	NA	NA	NA
chr1	17000000	17040000	0.00481597	0.5356	0.887524	0.226605	0.424586
chr1	17040000	17080000	NA	0.4736	NA	NA	NA
chr1	17080000	17120000	NA	0.469025	NA	NA	NA
chr1	17120000	17160000	NA	0.437787	NA	NA	NA
chr1	17160000	17200000	NA	0.463068	NA	NA	NA
chr1	17200000	17240000	NA	0.454375	NA	NA	NA
chr1	17240000	17280000	0.00337898	0.5518	0.910417	0.222356	0.466484
chr1	17280000	17320000	0.00381686	0.57725	0.902973	0.396631	0.417602
chr1	17320000	17360000	0.00343856	0.51285	0.924287	0.415835	0.402489
chr1	17360000	17400000	0.00370743	0.454	0.830843	0.579715	0.338883
chr1	17400000	17440000	0.00328802	0.514875	0.614417	0.953879	0.364684
chr1	17440000	17480000	0.00354138	0.491575	0.549823	0.900957	0.33078
chr1	17480000	17520000	0.00340612	0.4677	0.670438	0.895354	0.254538
chr1	17520000	17560000	0.00298206	0.52805	0.657831	0.810609	0.272749
chr1	17560000	17600000	0.00296756	0.519325	0.482611	1.10984	0.327487
chr1	17600000	17640000	0.00351794	0.488975	0.426359	1.3606	0.351993
chr1	17640000	17680000	0.00340282	0.48295	0.421034	1.35365	0.309691
chr1	17680000	17720000	0.00323259	0.510675	0.476557	1.26623	0.23962
chr1	17720000	17760000	0.00305346	0.51875	0.645715	1.01153	0.1134
chr1	17760000	17800000	0.00354053	0.49705	0.59786	1.10632	0.0679985
chr1	17800000	17840000	0.00335408	0.48715	0.313535	1.46624	0.206189
chr1	17840000	17880000	0.00335403	0.51265	0.171255	1.7582	0.245082
chr1	17880000	17920000	0.00333599	0.53835	0.0999686	1.8596	0.257156
chr1	17920000	17960000	0.00314624	0.549875	0.0448578	1.93466	0.291724
chr1	17960000	18000000	0.00307732	0.55575	-0.0246933	1.90863	0.321189
chr1	18000000	18040000	0.00313527	0.5367	-0.0937877	1.98758	0.326877
chr1	18040000	18080000	0.00340644	0.508875	-0.173088	2.01928	0.319882
chr1	18080000	18120000	0.00294031	0.50535	-0.202393	2.0374	0.33351
chr1	18120000	18160000	0.00341359	0.45535	-0.214635	2.01407	0.345636
chr1	18160000	18200000	0.00304683	0.4969	-0.20985	2.02151	0.330611
chr1	18200000	18240000	0.00317845	0.479575	-0.233245	2.01052	0.316331
chr1	18240000	18280000	0.00304261	0.488	-0.228406	1.97617	0.303847
chr1	18280000	18320000	0.00302079	0.476325	-0.213523	1.98377	0.289886
chr1	18320000	18360000	0.00310611	0.48995	-0.189538	1.95674	0.291116
chr1	18360000	18400000	0.00303093	0.485175	-0.162538	1.956	0.242397
chr1	18400000	18440000	0.00314257	0.503225	-0.16379	1.95862	0.27909
chr1	18440000	18480000	0.0032786	0.504475	-0.180837	1.98302	0.315631
chr1	18480000	18520000	0.00310634	0.4989	-0.224458	2.0279	0.298506
chr1	18520000	18560000	0.00307124	0.4882	-0.235513	2.02574	0.344192
chr1	18560000	18600000	0.00328595	0.489225	-0.229014	2.03173	0.347003
chr1	18600000	18640000	0.00312314	0.51015	-0.190372	1.99805	0.317912
chr1	18640000	18680000	0.00309685	0.4954	-0.181547	1.99583	0.321062
chr1	18680000	18720000	0.00349513	0.49435	-0.172547	2.01976	0.326777
chr1	18720000	18760000	0.00316366	0.465875	-0.166109	2.02029	0.333573
chr1	18760000	18800000	0.00334622	0.472025	-0.141446	2.02578	0.274054
chr1	18800000	18840000	0.00322576	0.47075	-0.0925533	1.97462	0.279409
chr1	18840000	18880000	0.00345276	0.46355	0.00456117	1.87349	0.298936
chr1	18880000	18920000	0.00295606	0.4927	0.106806	1.66107	0.279962
chr1	18920000	18960000	0.00327539	0.4954	0.295707	1.33103	0.181536
chr1	18960000	19000000	0.00310932	0.5239	0.380957	1.31194	0.105864
chr1	19000000	19040000	0.0031732	0.51845	0.241321	1.47468	0.216367
chr1	19040000	19080000	0.00311743	0.5191	0.179644	1.67537	0.253166
chr1	19080000	19120000	0.00310336	0.46565	0.212898	1.65803	0.291
chr1	19120000	19160000	0.00308278	0.5221	0.278598	1.49087	0.270551
chr1	19160000	19200000	0.00289887	0.5105	0.435824	1.20708	0.235998
chr1	19200000	19240000	0.00283652	0.54	0.662492	0.526212	0.218078
chr1	19240000	19280000	0.00287749	0.5438	0.905656	0.1261	0.186714
chr1	19280000	19320000	0.00330523	0.4755	0.84326	0.229883	0.194654
chr1	19320000	19360000	0.00330018	0.454475	0.79253	0.328608	0.233679
chr1	19360000	19400000	0.00311658	0.5431	0.773748	0.370206	0.272481
chr1	19400000	19440000	0.00336427	0.479475	0.791683	0.184665	0.295662
chr1	19440000	19480000	0.00309922	0.428425	0.869156	0.0845897	0.332497
chr1	19480000	19520000	0.00346294	0.414325	0.909533	0.0209978	0.338427
chr1	19520000	19560000	0.00310933	0.4381	0.934331	-0.0394147	0.306615
chr1	19560000	19600000	0.00366726	0.496675	0.876501	0.0134685	0.347578
chr1	19600000	19640000	0.00350404	0.485025	0.856913	0.168981	0.301566
chr1	19640000	19680000	0.002929	0.547975	0.792583	0.238287	0.249124
chr1	19680000	19720000	0.00299472	0.504475	0.746105	0.239779	0.23097
chr1	19720000	19760000	0.00313659	0.4751	0.789611	0.157625	0.120897
chr1	19760000	19800000	0.0032681	0.469075	0.898017	0.0262791	0.111173
chr1	19800000	19840000	0.00304974	0.481575	0.846896	0.0577321	0.163299
chr1	19840000	19880000	0.00360886	0.442675	0.750512	0.25645	0.169657
chr1	19880000	19920000	0.00314594	0.45475	0.737172	0.158344	0.209878
chr1	19920000	19960000	0.00324985	0.431275	0.801913	0.11181	0.202038
chr1	19960000	20000000	0.00296519	0.541425	0.713778	0.240481	0.247802
chr1	20000000	20040000	0.00323166	0.503125	0.684703	0.453412	0.253293
chr1	20040000	20080000	0.00302902	0.48815	0.6199	0.622405	0.250734
chr1	20080000	20120000	0.00326746	0.479525	0.645697	0.621682	0.24388
chr1	20120000	20160000	0.00329903	0.470775	0.641539	0.562376	0.232318
chr1	20160000	20200000	0.00320427	0.4174	0.564429	0.650386	0.277169
chr1	20200000	20240000	0.00320808	0.4252	0.597156	0.485666	0.258657
chr1	20240000	20280000	0.00323632	0.46575	0.45338	0.624589	0.330397
chr1	20280000	20320000	0.00333329	0.46065	0.404235	0.766196	0.317929
chr1	20320000	20360000	0.00391654	0.404275	0.4017	0.812526	0.32084
chr1	20360000	20400000	0.00336943	0.422975	0.479295	0.68423	0.255334
chr1	20400000	20440000	0.00313967	0.4863	0.452448	0.677764	0.295662
chr1	20440000	20480000	0.00326408	0.497325	0.457517	0.59516	0.292532
chr1	20480000	20520000	0.0029769	0.501725	0.600181	0.383652	0.271778
chr1	20520000	20560000	0.00336853	0.45875	0.513843	0.39642	0.325555
chr1	20560000	20600000	0.00334201	0.44925	0.530005	0.52199	0.280742
chr1	20600000	20640000	0.0030541	0.50295	0.508942	0.618061	0.274862
chr1	20640000	20680000	0.00294855	0.494725	0.550321	0.565713	0.300344
chr1	20680000	20720000	0.00313551	0.507725	0.49764	0.625416	0.311369
chr1	20720000	20760000	0.00337492	0.4695	0.457066	0.680424	0.302547
chr1	20760000	20800000	0.00315491	0.49105	0.491512	0.618571	0.310227
chr1	20800000	20840000	0.00307266	0.507025	0.56568	0.35925	0.332285
chr1	20840000	20880000	0.00324291	0.47005	0.549629	0.50547	0.351752
chr1	20880000	20920000	0.00327119	0.48605	0.54688	0.632648	0.317993
chr1	20920000	20960000	0.0035014	0.47315	0.591029	0.486792	0.330324
chr1	20960000	21000000	0.00305358	0.51175	0.706074	0.201126	0.305381
chr1	21000000	21040000	0.00328529	0.52115	0.671101	0.13991	0.335439
chr1	21040000	21080000	0.003058	0.507275	0.762092	0.0581938	0.302695
chr1	21080000	21120000	0.00329987	0.42235	0.777712	0.0110779	0.261487
chr1	21120000	21160000	0.00374197	0.4271	0.690102	0.176538	0.226522
chr1	21160000	21200000	0.0034401	0.39575	0.659329	0.19864	0.209856
chr1	21200000	21240000	0.00348129	0.37385	0.631864	0.19526	0.232691
chr1	21240000	21280000	0.0033437	0.3781	0.661966	0.179157	0.206734
chr1	21280000	21320000	0.00352031	0.379575	0.66468	0.157022	0.194182
chr1	21320000	21360000	0.00341003	0.388425	0.701499	0.138622	0.207802
chr1	21360000	21400000	0.0034877	0.396225	0.694036	0.10661	0.19493
chr1	21400000	21440000	0.00343258	0.391525	0.692798	0.0911969	0.215964
chr1	21440000	21480000	0.00342361	0.3995	0.714096	0.0644283	0.238067
chr1	21480000	21520000	0.00332813	0.4483	0.716251	0.0113804	0.282637
chr1	21520000	21560000	0.0031598	0.48625	0.60428	0.120001	0.328287
chr1	21560000	21600000	0.00324	0.517725	0.68922	0.097896	0.238661
chr1	21600000	21640000	0.0031492	0.516325	0.85393	-0.0211282	0.165902
chr1	21640000	21680000	0.00357083	0.525775	0.874578	-0.0646339	0.183086
chr1	21680000	21720000	0.0036761	0.4821	0.634743	0.107423	0.316901
chr1	21720000	21760000	NA	0.44995	NA	NA	NA
chr1	21760000	21800000	NA	0.452575	NA	NA	NA
chr1	21800000	21840000	0.00432648	0.48095	0.516452	0.592441	0.389388
chr1	21840000	21880000	0.00346104	0.496925	0.485461	0.710262	0.357041
chr1	21880000	21920000	0.00322597	0.5419	0.473519	0.755722	0.371099
chr1	21920000	21960000	0.00328115	0.57925	0.531766	0.681978	0.405697
chr1	21960000	22000000	0.00293723	0.5545	0.572783	0.491534	0.358517
chr1	22000000	22040000	0.00327557	0.41765	0.645173	0.355931	0.349126
chr1	22040000	22080000	0.0032907	0.399675	0.697398	0.25955	0.308106
chr1	22080000	22120000	0.00325562	0.457	0.756019	0.17581	0.281949
chr1	22120000	22160000	0.00312086	0.516075	0.622253	0.425736	0.350576
chr1	22160000	22200000	0.00325871	0.565775	0.559585	0.62623	0.371005
chr1	22200000	22240000	0.00352888	0.56155	0.568748	0.604888	0.375774
chr1	22240000	22280000	0.00336927	0.5267	0.602315	0.403964	0.393998
chr1	22280000	22320000	NA	0.5035	NA	NA	NA
chr1	22320000	22360000	NA	0.4881	NA	NA	NA
chr1	22360000	22400000	0.00362648	0.4584	0.890683	0.0171306	0.233617
chr1	22400000	22440000	0.0036133	0.4162	0.761517	0.200598	0.257337
chr1	22440000	22480000	0.0031601	0.550425	0.538678	0.536739	0.347109
chr1	22480000	22520000	0.00315023	0.5185	0.478837	0.754059	0.354585
chr1	22520000	22560000	0.0030447	0.49295	0.419293	0.92134	0.383715
chr1	22560000	22600000	0.00329559	0.54345	0.392082	0.982955	0.38051
chr1	22600000	22640000	0.00312884	0.464825	0.356949	1.01878	0.412467
chr1	22640000	22680000	0.00317385	0.512675	0.353764	1.03124	0.41131
chr1	22680000	22720000	0.00335525	0.4856	0.358906	0.990236	0.398419
chr1	22720000	22760000	0.00305605	0.46625	0.432205	0.777425	0.399946
chr1	22760000	22800000	0.00334895	0.415	0.58258	0.642193	0.292179
chr1	22800000	22840000	0.00321587	0.407475	0.501161	0.83556	0.321366
chr1	22840000	22880000	0.00308025	0.5119	0.403793	1.04029	0.366726
chr1	22880000	22920000	0.00323234	0.55545	0.330588	1.26186	0.421638
chr1	22920000	22960000	0.00311669	0.529425	0.285738	1.2769	0.45637
chr1	22960000	23000000	0.00325589	0.52215	0.291935	1.21505	0.455273
chr1	23000000	23040000	0.00328707	0.5041	0.289649	1.25874	0.424903
chr1	23040000	23080000	0.00299485	0.503375	0.299342	1.33553	0.473267
chr1	23080000	23120000	0.00328759	0.525275	0.277609	1.44452	0.462226
chr1	23120000	23160000	0.00334498	0.524975	0.29861	1.43807	0.460242
chr1	23160000	23200000	0.00305482	0.51105	0.308523	1.39182	0.459256
chr1	23200000	23240000	0.00288165	0.519	0.334271	1.29908	0.458979
chr1	23240000	23280000	0.00340207	0.475425	0.379775	1.15979	0.453079
chr1	23280000	23320000	0.00310308	0.471775	0.489055	0.855983	0.431486
chr1	23320000	23360000	0.00366759	0.4351	0.669791	0.528883	0.388584
chr1	23360000	23400000	0.0033713	0.377725	0.71841	0.342522	0.406843
chr1	23400000	23440000	0.00301152	0.432775	0.697859	0.19907	0.414287
chr1	23440000	23480000	0.00343549	0.417375	0.801103	0.112896	0.342194
chr1	23480000	23520000	0.00325441	0.4633	0.733533	0.108843	0.411078
chr1	23520000	23560000	0.0032636	0.48375	0.658142	0.329775	0.464476
chr1	23560000	23600000	0.00334588	0.4661	0.67688	0.363593	0.457301
chr1	23600000	23640000	0.00349732	0.37775	0.768852	0.0848748	0.475599
chr1	23640000	23680000	0.00333707	0.418475	0.838505	-0.0655839	0.495007
chr1	23680000	23720000	0.00336436	0.4716	0.784653	-0.0686921	0.530273
chr1	23720000	23760000	0.0031073	0.494075	0.764898	-0.00325849	0.537598
chr1	23760000	23800000	0.00315396	0.490075	0.768994	0.0118204	0.568284
chr1	23800000	23840000	0.00341658	0.496125	0.742473	-0.1132	0.569293
chr1	23840000	23880000	0.00321121	0.501525	0.735623	-0.212266	0.56154
chr1	23880000	23920000	0.00353159	0.488625	0.882835	-0.327821	0.519936
chr1	23920000	23960000	0.00354873	0.49395	0.873961	-0.322005	0.551597
chr1	23960000	24000000	0.00339632	0.479475	0.713592	-0.198932	0.584926
chr1	24000000	24040000	0.00347041	0.469925	0.788731	-0.189661	0.613323
chr1	24040000	24080000	0.00344606	0.463675	0.78653	-0.204121	0.613076
chr1	24080000	24120000	0.00339659	0.467975	0.772323	-0.272778	0.626733
chr1	24120000	24160000	0.00338867	0.497825	0.769389	-0.270884	0.628069
chr1	24160000	24200000	0.00373076	0.455975	0.735045	-0.224766	0.590992
chr1	24200000	24240000	0.0039292	0.47965	0.700491	-0.176781	0.586693
chr1	24240000	24280000	0.00356369	0.451625	0.670919	-0.19364	0.589966
chr1	24280000	24320000	0.00388571	0.42335	0.737993	-0.241232	0.559319
chr1	24320000	24360000	0.00386395	0.46655	0.652726	-0.108261	0.554453
chr1	24360000	24400000	0.0032272	0.472625	0.596433	-0.0722677	0.545877
chr1	24400000	24440000	0.00321089	0.536425	0.586397	-0.0583602	0.536501
chr1	24440000	24480000	0.00317316	0.492625	0.568269	-0.086528	0.527823
chr1	24480000	24520000	0.00304162	0.4729	0.579811	-0.195875	0.496281
chr1	24520000	24560000	0.00322356	0.48665	0.541259	-0.226995	0.470653
chr1	24560000	24600000	0.00376166	0.4505	0.58854	-0.138729	0.459351
chr1	24600000	24640000	0.0033977	0.462875	0.604326	-0.153745	0.434313
chr1	24640000	24680000	0.00319804	0.50355	0.61622	-0.18611	0.447899
chr1	24680000	24720000	0.00300696	0.47405	0.565898	-0.229302	0.475989
chr1	24720000	24760000	0.00315915	0.416625	0.617316	-0.312877	0.478329
chr1	24760000	24800000	0.00357989	0.449175	0.67643	-0.296762	0.444788
chr1	24800000	24840000	0.00340398	0.4547	0.720888	-0.354146	0.450868
chr1	24840000	24880000	0.00325742	0.4197	0.663798	-0.322345	0.467446
chr1	24880000	24920000	0.00319274	0.49625	0.614743	-0.260526	0.48535
chr1	24920000	24960000	0.00361172	0.4368	0.567759	-0.246094	0.505751
chr1	24960000	25000000	0.00349979	0.415675	0.604665	-0.281691	0.514064
chr1	25000000	25040000	0.00332143	0.48375	0.542887	-0.23238	0.489876
chr1	25040000	25080000	0.00345816	0.491725	0.61068	-0.196558	0.49024
chr1	25080000	25120000	0.00341089	0.40565	0.579339	-0.16749	0.490763
chr1	25120000	25160000	0.00374873	0.417325	0.52445	-0.193708	0.511664
chr1	25160000	25200000	0.00329708	0.4629	0.52624	-0.205047	0.496594
chr1	25200000	25240000	0.00321757	0.4967	0.575805	-0.156015	0.459753
chr1	25240000	25280000	0.00320123	0.540325	0.634201	-0.285279	0.425978
chr1	25280000	25320000	0.00343859	0.519325	0.714756	-0.338549	0.435109
chr1	25320000	25360000	0.0034662	0.532875	0.71567	-0.324693	0.421955
chr1	25360000	25400000	0.00336047	0.52175	0.577631	-0.242122	0.501021
chr1	25400000	25440000	0.00328875	0.493725	0.567179	-0.191198	0.4832
chr1	25440000	25480000	0.00343189	0.45725	0.569793	-0.143584	0.484311
chr1	25480000	25520000	0.00357866	0.452825	0.579575	-0.115176	0.532751
chr1	25520000	25560000	0.00326477	0.469025	0.59925	-0.20097	0.54423
chr1	25560000	25600000	0.0044083	0.458475	0.704393	-0.292327	0.551732
chr1	25600000	25640000	NA	0.472225	NA	NA	NA
chr1	25640000	25680000	NA	0.442275	NA	NA	NA
chr1	25680000	25720000	NA	0.45465	NA	NA	NA
chr1	25720000	25760000	NA	0.474525	NA	NA	NA
chr1	25760000	25800000	0.0035807	0.395775	0.677105	-0.297124	0.514283
chr1	25800000	25840000	0.00458687	0.427575	0.64924	-0.29441	0.537132
chr1	25840000	25880000	0.00321116	0.522625	0.650826	-0.320613	0.493767
chr1	25880000	25920000	0.00318818	0.533475	0.661844	-0.32252	0.501654
chr1	25920000	25960000	0.00333928	0.4685	0.618373	-0.356823	0.469439
chr1	25960000	26000000	0.00343803	0.4611	0.689675	-0.364353	0.460018
chr1	26000000	26040000	0.00345797	0.477525	0.670062	-0.359863	0.434653
chr1	26040000	26080000	0.00309292	0.497125	0.666622	-0.318178	0.437842
chr1	26080000	26120000	0.00341844	0.522625	0.660105	-0.331889	0.477736
chr1	26120000	26160000	0.00312258	0.5338	0.593604	-0.3409	0.54126
chr1	26160000	26200000	0.00335928	0.45325	0.63896	-0.296665	0.565586
chr1	26200000	26240000	0.00328359	0.490275	0.624294	-0.314257	0.564187
chr1	26240000	26280000	0.00351293	0.465325	0.653749	-0.279036	0.534699
chr1	26280000	26320000	0.00335221	0.460325	0.657871	-0.270934	0.561436
chr1	26320000	26360000	0.00314252	0.505075	0.603665	-0.267906	0.586797
chr1	26360000	26400000	0.00342116	0.518975	0.598451	-0.22653	0.580949
chr1	26400000	26440000	0.00318916	0.466575	0.582734	-0.262271	0.584944
chr1	26440000	26480000	0.00352364	0.42855	0.635335	-0.289308	0.591894
chr1	26480000	26520000	0.00320366	0.547325	0.610012	-0.28261	0.623432
chr1	26520000	26560000	0.00347326	0.484625	0.635217	-0.292049	0.60001
chr1	26560000	26600000	0.00357029	0.44435	0.63322	-0.324337	0.591471
chr1	26600000	26640000	0.00321195	0.53615	0.724809	-0.375647	0.579014
chr1	26640000	26680000	0.00339515	0.5202	0.637633	-0.33582	0.619077
chr1	26680000	26720000	0.00320718	0.505275	0.655242	-0.312832	0.626948
chr1	26720000	26760000	0.00347971	0.463325	0.63673	-0.307743	0.646571
chr1	26760000	26800000	0.00343871	0.46495	0.672449	-0.313174	0.663589
chr1	26800000	26840000	0.00341625	0.474875	0.682057	-0.370671	0.648634
chr1	26840000	26880000	0.00332154	0.5199	0.703938	-0.370597	0.646389
chr1	26880000	26920000	0.00337033	0.49385	0.660045	-0.376799	0.619764
chr1	26920000	26960000	0.00356431	0.454875	0.602281	-0.374864	0.5827
chr1	26960000	27000000	0.00416356	0.446975	0.667232	-0.320047	0.561489
chr1	27000000	27040000	0.00336787	0.460475	0.660685	-0.369676	0.523866
chr1	27040000	27080000	0.00378457	0.44245	0.719615	-0.35622	0.499524
chr1	27080000	27120000	0.00313373	0.47575	0.658395	-0.360913	0.541156
chr1	27120000	27160000	0.00340395	0.50195	0.66164	-0.378062	0.59957
chr1	27160000	27200000	0.00344869	0.516075	0.681017	-0.369748	0.647728
chr1	27200000	27240000	0.00339889	0.486825	0.684695	-0.350579	0.628221
chr1	27240000	27280000	0.00339315	0.49305	0.693398	-0.298259	0.633241
chr1	27280000	27320000	0.00333514	0.488225	0.682766	-0.245502	0.655924
chr1	27320000	27360000	0.00331543	0.52165	0.643319	-0.22887	0.606451
chr1	27360000	27400000	0.00389028	0.518175	0.626327	-0.211542	0.58354
chr1	27400000	27440000	0.00335616	0.5068	0.594863	-0.251742	0.546534
chr1	27440000	27480000	0.003256	0.510725	0.652347	-0.264686	0.56288
chr1	27480000	27520000	0.00381551	0.4638	0.608282	-0.276392	0.517689
chr1	27520000	27560000	0.00360916	0.4495	0.622978	-0.288831	0.563964
chr1	27560000	27600000	0.00339817	0.45195	0.656652	-0.307809	0.528356
chr1	27600000	27640000	0.00341722	0.47435	0.547306	-0.325086	0.564892
chr1	27640000	27680000	0.00328593	0.530775	0.667279	-0.331001	0.562041
chr1	27680000	27720000	0.00316478	0.55945	0.646767	-0.34783	0.574633
chr1	27720000	27760000	0.00323343	0.480925	0.612065	-0.353488	0.532452
chr1	27760000	27800000	0.00339422	0.43015	0.722191	-0.364237	0.518236
chr1	27800000	27840000	0.00354701	0.4693	0.706974	-0.359165	0.517968
chr1	27840000	27880000	0.00333582	0.5553	0.686137	-0.347677	0.553717
chr1	27880000	27920000	0.0033752	0.553925	0.663542	-0.336033	0.555156
chr1	27920000	27960000	0.00313866	0.54105	0.644771	-0.352633	0.571695
chr1	27960000	28000000	0.00337628	0.507075	0.658079	-0.342447	0.544954
chr1	28000000	28040000	0.00350234	0.44125	0.680946	-0.25611	0.563478
chr1	28040000	28080000	0.00332887	0.448475	0.704064	-0.253183	0.582698
chr1	28080000	28120000	0.00342009	0.425825	0.732589	-0.251449	0.577454
chr1	28120000	28160000	0.00342583	0.4183	0.717113	-0.242238	0.578888
chr1	28160000	28200000	0.0035694	0.497725	0.683568	-0.290412	0.543306
chr1	28200000	28240000	0.0031888	0.47145	0.769113	-0.294236	0.545139
chr1	28240000	28280000	0.00355071	0.47675	0.7294	-0.267574	0.536462
chr1	28280000	28320000	0.00328831	0.472375	0.694394	-0.246021	0.520262
chr1	28320000	28360000	0.0034325	0.397825	0.72116	-0.211484	0.540257
chr1	28360000	28400000	0.00344742	0.37775	0.728633	-0.221161	0.504651
chr1	28400000	28440000	0.00337258	0.418525	0.692322	-0.245119	0.508702
chr1	28440000	28480000	0.00350802	0.4682	0.711	-0.161262	0.499874
chr1	28480000	28520000	0.00328245	0.475075	0.752938	-0.199285	0.515956
chr1	28520000	28560000	0.00357643	0.445175	0.717881	-0.261545	0.536642
chr1	28560000	28600000	0.00329996	0.4769	0.758296	-0.241261	0.549008
chr1	28600000	28640000	0.00349488	0.465675	0.76805	-0.154184	0.562857
chr1	28640000	28680000	0.00349476	0.456	0.753163	-0.19493	0.54913
chr1	28680000	28720000	0.00361313	0.456175	0.725889	-0.207875	0.559565
chr1	28720000	28760000	0.00347366	0.40945	0.753404	-0.201718	0.530228
chr1	28760000	28800000	0.00342236	0.42355	0.800912	-0.216448	0.504938
chr1	28800000	28840000	0.00351722	0.45195	0.811566	-0.264041	0.511656
chr1	28840000	28880000	0.00357691	0.5015	0.816781	-0.290508	0.57587
chr1	28880000	28920000	0.00399116	0.4834	0.85115	-0.310345	0.577963
chr1	28920000	28960000	0.00348744	0.4644	0.81725	-0.231097	0.587346
chr1	28960000	29000000	0.00360861	0.48535	0.836821	-0.237727	0.570978
chr1	29000000	29040000	0.00373951	0.451325	0.81196	-0.10358	0.506685
chr1	29040000	29080000	0.00349347	0.455425	0.807133	-0.0692373	0.487247
chr1	29080000	29120000	0.00353469	0.452925	0.740362	0.0414283	0.431034
chr1	29120000	29160000	0.0034333	0.4974	0.700213	0.250112	0.417263
chr1	29160000	29200000	0.0030428	0.499075	0.671179	0.142533	0.414498
chr1	29200000	29240000	0.00325003	0.496875	0.710326	-0.0472494	0.356296
chr1	29240000	29280000	0.00325155	0.416925	0.840448	-0.0579199	0.267392
chr1	29280000	29320000	0.00351308	0.40345	0.812269	-0.00761742	0.243042
chr1	29320000	29360000	0.00344402	0.396225	0.72179	0.0112201	0.298633
chr1	29360000	29400000	0.00354772	0.393925	0.742908	0.0508679	0.301331
chr1	29400000	29440000	0.00319547	0.4207	0.768539	0.213	0.244501
chr1	29440000	29480000	0.00306866	0.522825	0.742599	0.311412	0.223472
chr1	29480000	29520000	0.00333367	0.4404	0.740248	0.322165	0.205068
chr1	29520000	29560000	0.0031339	0.48185	0.634944	0.570993	0.256344
chr1	29560000	29600000	0.00288325	0.51215	0.398519	1.16243	0.295839
chr1	29600000	29640000	0.00300456	0.504875	0.252612	1.48378	0.319354
chr1	29640000	29680000	0.00303634	0.509125	0.144685	1.65675	0.325527
chr1	29680000	29720000	0.00309667	0.481075	0.0448775	1.72725	0.37387
chr1	29720000	29760000	0.00358733	0.4681	-0.0101709	1.81337	0.37087
chr1	29760000	29800000	0.00330409	0.50255	-0.0273604	1.83966	0.382406
chr1	29800000	29840000	0.00302582	0.47305	-0.064507	1.84478	0.38007
chr1	29840000	29880000	0.00316598	0.494932	-0.0922028	1.81993	0.373197
chr1	29880000	29920000	NA	NA	NA	NA	NA
chr1	29920000	29960000	NA	NA	NA	NA	NA
chr1	29960000	30000000	NA	NA	NA	NA	NA
chr1	30000000	30040000	NA	0.490602	NA	NA	NA
chr1	30040000	30080000	0.00289871	0.472875	-0.108086	1.7671	0.362169
chr1	30080000	30120000	0.00317125	0.463175	-0.106218	1.82386	0.350491
chr1	30120000	30160000	0.00300542	0.4708	-0.102977	1.79413	0.348328
chr1	30160000	30200000	0.00322833	0.50015	-0.0820343	1.80863	0.360386
chr1	30200000	30240000	0.00303247	0.496375	-0.0898214	1.79029	0.358909
chr1	30240000	30280000	0.00329046	0.45215	-0.0833631	1.7357	0.358828
chr1	30280000	30320000	0.00314521	0.461425	-0.0723315	1.69684	0.356207
chr1	30320000	30360000	0.0033323	0.4691	-0.0648698	1.72443	0.353674
chr1	30360000	30400000	0.00318731	0.487275	-0.0862333	1.76399	0.343116
chr1	30400000	30440000	0.00285617	0.500175	-0.0941834	1.7954	0.358604
chr1	30440000	30480000	0.00316084	0.4436	-0.0878866	1.75526	0.351482
chr1	30480000	30520000	0.00339394	0.47585	-0.115808	1.81795	0.360252
chr1	30520000	30560000	0.00302106	0.487225	-0.0897161	1.75038	0.366313
chr1	30560000	30600000	0.00288304	0.51845	-0.0808023	1.73246	0.351953
chr1	30600000	30640000	0.00322466	0.4643	-0.0913694	1.79041	0.353194
chr1	30640000	30680000	0.00330224	0.4541	-0.0844774	1.78278	0.352467
chr1	30680000	30720000	0.00328781	0.461625	-0.073665	1.77994	0.339042
chr1	30720000	30760000	0.00313382	0.502925	-0.0724247	1.80126	0.352424
chr1	30760000	30800000	0.00306759	0.4687	-0.0489597	1.7786	0.357787
chr1	30800000	30840000	0.00337228	0.46175	-0.0150875	1.75311	0.335762
chr1	30840000	30880000	0.00326466	0.503275	0.0205242	1.70942	0.344655
chr1	30880000	30920000	0.00376851	0.461325	-0.0261552	1.77683	0.328908
chr1	30920000	30960000	0.00329738	0.5031	-0.0491822	1.83887	0.361726
chr1	30960000	31000000	0.00350485	0.4827	-0.0108379	1.8139	0.34755
chr1	31000000	31040000	0.00331489	0.426275	0.0266931	1.73408	0.334239
chr1	31040000	31080000	0.0034949	0.452375	0.0893338	1.68121	0.343174
chr1	31080000	31120000	0.00309355	0.46995	0.177976	1.58865	0.308246
chr1	31120000	31160000	0.00304502	0.511625	0.296739	1.36189	0.291267
chr1	31160000	31200000	0.00300293	0.534425	0.550487	0.740859	0.240443
chr1	31200000	31240000	0.00313574	0.528925	0.899659	0.170011	0.168643
chr1	31240000	31280000	0.00311131	0.52615	0.678815	0.38513	0.21868
chr1	31280000	31320000	0.00352718	0.485375	0.564047	0.699679	0.287658
chr1	31320000	31360000	0.00339372	0.5264	0.593651	0.791232	0.274807
chr1	31360000	31400000	0.00313023	0.5211	0.620327	0.530913	0.29465
chr1	31400000	31440000	0.00333542	0.418075	0.714092	0.304828	0.228892
chr1	31440000	31480000	0.00340476	0.39525	0.792468	0.215475	0.209268
chr1	31480000	31520000	0.00311283	0.4061	0.825741	0.152013	0.199978
chr1	31520000	31560000	0.00325575	0.4498	0.780721	0.214299	0.218947
chr1	31560000	31600000	0.0031627	0.459025	0.646642	0.47693	0.291199
chr1	31600000	31640000	0.0031734	0.48375	0.645173	0.461485	0.325109
chr1	31640000	31680000	0.00355449	0.50845	0.568955	0.603955	0.321134
chr1	31680000	31720000	0.00313573	0.4959	0.565606	0.690127	0.326708
chr1	31720000	31760000	0.00343807	0.426325	0.66583	0.46853	0.287684
chr1	31760000	31800000	0.0031442	0.4319	0.705217	0.403176	0.283901
chr1	31800000	31840000	0.00315549	0.414425	0.624242	0.543491	0.314754
chr1	31840000	31880000	0.00305944	0.492475	0.63255	0.515826	0.357186
chr1	31880000	31920000	0.00309257	0.51905	0.571937	0.576916	0.374455
chr1	31920000	31960000	0.00408157	0.4166	0.560813	0.663316	0.363709
chr1	31960000	32000000	0.00345626	0.442075	0.590274	0.611378	0.346168
chr1	32000000	32040000	0.00325967	0.4507	0.573148	0.471891	0.393376
chr1	32040000	32080000	0.00319092	0.485975	0.650587	0.41548	0.38999
chr1	32080000	32120000	0.00302801	0.509875	0.719086	0.239707	0.364014
chr1	32120000	32160000	0.00309662	0.559875	0.690992	0.142987	0.432255
chr1	32160000	32200000	0.00314098	0.552325	0.726572	0.210601	0.421008
chr1	32200000	32240000	0.00279404	0.577975	0.754755	0.0777151	0.421324
chr1	32240000	32280000	0.00307833	0.50405	0.711431	-0.0827926	0.432348
chr1	32280000	32320000	0.0031905	0.46365	0.787638	-0.175258	0.372774
chr1	32320000	32360000	0.0035693	0.4433	0.825669	-0.162057	0.326159
chr1	32360000	32400000	0.00350626	0.4048	0.856398	-0.230006	0.326524
chr1	32400000	32440000	0.00334779	0.4704	0.80812	-0.268046	0.348586
chr1	32440000	32480000	0.0033615	0.47025	0.80804	-0.213933	0.409136
chr1	32480000	32520000	0.00332102	0.427775	0.810863	-0.185009	0.420123
chr1	32520000	32560000	0.00326704	0.479725	0.79256	-0.187274	0.447136
chr1	32560000	32600000	0.00333038	0.463825	0.832659	-0.195186	0.465413
chr1	32600000	32640000	0.00369068	0.435875	0.836279	-0.196331	0.445558
chr1	32640000	32680000	0.00314846	0.5132	0.8328	-0.295453	0.516489
chr1	32680000	32720000	0.00348359	0.518125	0.834902	-0.327058	0.505453
chr1	32720000	32760000	0.00330401	0.4923	0.919279	-0.335503	0.455213
chr1	32760000	32800000	0.0034094	0.4625	0.862014	-0.290547	0.449308
chr1	32800000	32840000	0.00350212	0.537975	0.83492	-0.245221	0.470673
chr1	32840000	32880000	0.00328925	0.46875	0.762511	-0.155561	0.477177
chr1	32880000	32920000	0.00401699	0.449275	0.705733	0.00974214	0.46106
chr1	32920000	32960000	0.00311361	0.458225	0.704033	0.137036	0.445819
chr1	32960000	33000000	0.00325105	0.450675	0.702926	0.0848772	0.397576
chr1	33000000	33040000	0.00340138	0.442825	0.711152	0.120445	0.366734
chr1	33040000	33080000	0.00340724	0.43815	0.74224	0.0767639	0.364578
chr1	33080000	33120000	0.00341096	0.446425	0.814364	-0.0924938	0.322664
chr1	33120000	33160000	0.00343915	0.433225	0.792181	-0.116555	0.351095
chr1	33160000	33200000	0.00331005	0.5224	0.750634	-0.0619934	0.342528
chr1	33200000	33240000	0.00373222	0.5435	0.802916	-0.0573154	0.291106
chr1	33240000	33280000	0.00353571	0.458325	0.799503	-0.115761	0.261183
chr1	33280000	33320000	0.00333152	0.4189	0.796475	-0.0367091	0.241171
chr1	33320000	33360000	0.00312685	0.52525	0.708322	0.0657177	0.286064
chr1	33360000	33400000	0.0032844	0.481625	0.692731	0.104425	0.251251
chr1	33400000	33440000	0.00348009	0.4573	0.785764	0.0158559	0.159499
chr1	33440000	33480000	0.00319945	0.483325	0.81562	0.0593766	0.101141
chr1	33480000	33520000	0.00379209	0.467475	0.781667	0.0357389	0.132928
chr1	33520000	33560000	0.00343569	0.474725	0.725223	0.0903658	0.163499
chr1	33560000	33600000	0.00324474	0.4482	0.767547	0.138611	0.15654
chr1	33600000	33640000	0.00295356	0.513875	0.730281	0.319796	0.0951157
chr1	33640000	33680000	0.00345447	0.42505	0.696799	0.413458	0.0651909
chr1	33680000	33720000	0.0032116	0.4493	0.678744	0.473972	0.0527349
chr1	33720000	33760000	0.00328716	0.50625	0.684631	0.47955	0.00239459
chr1	33760000	33800000	0.00324549	0.522725	0.63147	0.580663	-0.0137775
chr1	33800000	33840000	0.00321581	0.487	0.68458	0.486566	-0.0619808
chr1	33840000	33880000	0.00336778	0.417325	0.53769	0.736315	-0.0345463
chr1	33880000	33920000	0.00318793	0.424075	0.533923	0.836205	-0.0569139
chr1	33920000	33960000	0.00289201	0.4553	0.424195	1.04669	-0.101042
chr1	33960000	34000000	0.00337105	0.4491	0.168731	1.52891	-0.0330875
chr1	34000000	34040000	0.00316628	0.43925	0.0218307	1.73955	0.0678461
chr1	34040000	34080000	0.00310013	0.45	-0.0721202	1.74358	0.084152
chr1	34080000	34120000	0.00307813	0.466175	-0.126112	1.79273	0.105782
chr1	34120000	34160000	0.00353011	0.4417	-0.243761	1.84012	0.167961
chr1	34160000	34200000	0.00323435	0.438725	-0.304851	1.86875	0.167778
chr1	34200000	34240000	0.00301602	0.439025	-0.357925	1.81667	0.192099
chr1	34240000	34280000	0.00296968	0.456925	-0.400164	1.84025	0.206261
chr1	34280000	34320000	0.00343625	0.453625	-0.40575	1.82961	0.211895
chr1	34320000	34360000	0.00324459	0.441875	-0.415639	1.80588	0.187445
chr1	34360000	34400000	0.00319544	0.46875	-0.417398	1.81482	0.237182
chr1	34400000	34440000	0.0030999	0.473225	-0.448322	1.8037	0.188795
chr1	34440000	34480000	0.00325881	0.465475	-0.438823	1.81888	0.208345
chr1	34480000	34520000	0.00314005	0.4357	-0.474072	1.81398	0.235784
chr1	34520000	34560000	0.00356502	0.459	-0.510138	1.79021	0.223107
chr1	34560000	34600000	0.0037121	0.43155	-0.504413	1.76934	0.25301
chr1	34600000	34640000	0.00308445	0.477975	-0.46687	1.79602	0.200184
chr1	34640000	34680000	0.00319345	0.47925	-0.492956	1.79203	0.204066
chr1	34680000	34720000	0.00362129	0.415625	-0.520987	1.75587	0.223945
chr1	34720000	34760000	0.00344159	0.4376	-0.507892	1.76247	0.248698
chr1	34760000	34800000	0.00326947	0.40535	-0.516332	1.73312	0.255129
chr1	34800000	34840000	0.00328601	0.44955	-0.490154	1.75604	0.235696
chr1	34840000	34880000	0.00326672	0.406825	-0.46146	1.75039	0.191645
chr1	34880000	34920000	0.00293972	0.464325	-0.449506	1.77117	0.214956
chr1	34920000	34960000	0.00326021	0.433725	-0.420332	1.70041	0.20762
chr1	34960000	35000000	0.00338481	0.419125	-0.466394	1.73603	0.198497
chr1	35000000	35040000	0.0039587	0.410475	-0.405279	1.72375	0.189612
chr1	35040000	35080000	0.00305563	0.447	-0.326831	1.74083	0.160473
chr1	35080000	35120000	0.00343504	0.46425	-0.26656	1.76255	0.120265
chr1	35120000	35160000	0.00302258	0.4349	-0.166812	1.70513	0.065528
chr1	35160000	35200000	0.00300466	0.460925	-0.0977691	1.66329	0.0339999
chr1	35200000	35240000	0.00317529	0.50325	0.0746769	1.45824	-0.00559597
chr1	35240000	35280000	0.0031968	0.48645	0.320226	1.08827	-0.173453
chr1	35280000	35320000	0.00313398	0.460725	0.447573	0.884294	-0.206766
chr1	35320000	35360000	0.00304291	0.476925	0.603288	0.538781	-0.202926
chr1	35360000	35400000	0.00300639	0.49655	0.485732	0.754575	-0.113459
chr1	35400000	35440000	0.00355806	0.405375	0.521197	0.609171	-0.0958037
chr1	35440000	35480000	0.00327716	0.41295	0.675511	0.322826	-0.109874
chr1	35480000	35520000	0.00354066	0.414425	0.712115	0.213272	-0.0919446
chr1	35520000	35560000	0.00373897	0.4277	0.707196	0.204526	-0.0793217
chr1	35560000	35600000	0.00359588	0.418725	0.676594	0.230131	-0.037681
chr1	35600000	35640000	0.00392728	0.4395	0.694051	0.18317	-0.0186023
chr1	35640000	35680000	0.00321757	0.429475	0.777954	-0.0202827	0.0410107
chr1	35680000	35720000	0.00346477	0.421775	0.705093	0.0962464	0.0536992
chr1	35720000	35760000	0.00330245	0.4107	0.751685	0.0624285	0.011397
chr1	35760000	35800000	0.00326434	0.39885	0.685538	0.10357	0.0231833
chr1	35800000	35840000	0.00342577	0.374225	0.714534	0.145481	0.0273203
chr1	35840000	35880000	0.00338366	0.3745	0.706733	0.129871	0.0732276
chr1	35880000	35920000	0.00317726	0.4485	0.695371	0.056104	0.107931
chr1	35920000	35960000	0.00350308	0.40735	0.739138	0.0630524	0.0573752
chr1	35960000	36000000	0.00338542	0.401925	0.78572	0.058315	0.0118274
chr1	36000000	36040000	0.00310053	0.474775	0.749945	-0.0701877	0.131106
chr1	36040000	36080000	0.00326976	0.474575	0.760952	0.0287848	0.134559
chr1	36080000	36120000	0.00331884	0.41015	0.795014	0.0558847	0.0949266
chr1	36120000	36160000	0.00337304	0.467925	0.714451	0.166049	0.104355
chr1	36160000	36200000	0.00305949	0.481325	0.733791	0.0586295	0.152025
chr1	36200000	36240000	0.00322646	0.41805	0.727197	0.0437496	0.183462
chr1	36240000	36280000	0.00323503	0.45195	0.720558	0.11968	0.191749
chr1	36280000	36320000	0.00346828	0.40855	0.717199	0.252478	0.199298
chr1	36320000	36360000	0.00320662	0.44845	0.765191	0.181259	0.201089
chr1	36360000	36400000	0.0032108	0.440675	0.824309	0.118095	0.206154
chr1	36400000	36440000	0.00356698	0.374275	0.820062	0.114575	0.169861
chr1	36440000	36480000	0.00336385	0.376425	0.771482	0.200238	0.195726
chr1	36480000	36520000	0.00322948	0.411175	0.734301	0.237432	0.199755
chr1	36520000	36560000	0.00300486	0.4463	0.756229	0.17039	0.248085
chr1	36560000	36600000	0.00318265	0.55325	0.760965	0.0610643	0.30267
chr1	36600000	36640000	0.00333828	0.508325	0.863016	-0.0787474	0.232149
chr1	36640000	36680000	0.00362197	0.509875	0.849498	-0.0866343	0.2757
chr1	36680000	36720000	0.00344808	0.44995	0.88626	-0.0968457	0.244967
chr1	36720000	36760000	0.00341434	0.427325	0.837939	-0.0752221	0.207233
chr1	36760000	36800000	0.00323946	0.510575	0.839356	-0.0421377	0.20982
chr1	36800000	36840000	0.00331603	0.5286	0.848617	0.0265544	0.192812
chr1	36840000	36880000	0.00337178	0.49055	0.884061	-0.0237168	0.181035
chr1	36880000	36920000	0.00311321	0.45925	0.765912	0.172092	0.191934
chr1	36920000	36960000	0.0029879	0.505125	0.691456	0.603214	0.135765
chr1	36960000	37000000	0.00304204	0.48395	0.459507	1.09829	0.195344
chr1	37000000	37040000	0.00315041	0.47125	0.31251	1.31594	0.24615
chr1	37040000	37080000	0.00309528	0.501	0.203484	1.53732	0.276279
chr1	37080000	37120000	0.003182	0.488225	0.139349	1.66163	0.292591
chr1	37120000	37160000	0.00305116	0.47165	0.0868146	1.69506	0.313646
chr1	37160000	37200000	0.00309975	0.484125	0.0229648	1.72888	0.317724
chr1	37200000	37240000	0.0031649	0.47435	-0.0194736	1.81088	0.339415
chr1	37240000	37280000	0.00306184	0.50605	-0.0490384	1.86983	0.365195
chr1	37280000	37320000	0.00286854	0.510875	-0.0766695	1.86651	0.356604
chr1	37320000	37360000	0.00315131	0.488275	-0.0926429	1.85988	0.351075
chr1	37360000	37400000	0.00317935	0.452075	-0.0922039	1.85677	0.373634
chr1	37400000	37440000	0.0032748	0.515175	-0.131581	1.89744	0.36473
chr1	37440000	37480000	0.0030047	0.5056	-0.127965	1.88022	0.357127
chr1	37480000	37520000	0.00295802	0.50795	-0.109002	1.87993	0.364523
chr1	37520000	37560000	0.00312281	0.489525	-0.119806	1.84142	0.365991
chr1	37560000	37600000	0.00302589	0.4874	-0.146419	1.86594	0.383042
chr1	37600000	37640000	0.00319368	0.44305	-0.120071	1.8301	0.371062
chr1	37640000	37680000	0.00368706	0.398375	-0.133826	1.83373	0.365656
chr1	37680000	37720000	0.00333778	0.439625	-0.115796	1.85338	0.36193
chr1	37720000	37760000	0.00319591	0.488225	-0.0402898	1.83251	0.339588
chr1	37760000	37800000	0.00317902	0.4988	0.0325548	1.77305	0.336582
chr1	37800000	37840000	0.00346369	0.4678	0.0962457	1.7136	0.347136
chr1	37840000	37880000	0.00326056	0.468175	0.239318	1.51022	0.291795
chr1	37880000	37920000	0.00300085	0.49935	0.428225	1.01019	0.225449
chr1	37920000	37960000	0.00307873	0.5019	0.804087	0.383308	0.108746
chr1	37960000	38000000	0.00337876	0.44655	0.800251	0.325976	0.145348
chr1	38000000	38040000	0.00346274	0.45305	0.786417	0.298926	0.217342
chr1	38040000	38080000	0.00295696	0.4476	0.73389	0.362806	0.269845
chr1	38080000	38120000	0.00327386	0.506825	0.622847	0.634596	0.272952
chr1	38120000	38160000	0.0033635	0.504275	0.686731	0.417219	0.300796
chr1	38160000	38200000	0.00304571	0.502575	0.670263	0.469371	0.302649
chr1	38200000	38240000	0.00337072	0.4692	0.654986	0.526663	0.297994
chr1	38240000	38280000	0.0032444	0.486425	0.736151	0.299078	0.284726
chr1	38280000	38320000	0.00323954	0.4341	0.794088	0.158746	0.2654
chr1	38320000	38360000	0.00335122	0.451825	0.740894	0.150744	0.30983
chr1	38360000	38400000	0.00395187	0.4691	0.747611	0.157282	0.291857
chr1	38400000	38440000	0.00382085	0.4848	0.80076	0.0961318	0.288317
chr1	38440000	38480000	0.00330268	0.49185	0.803264	0.0151469	0.248116
chr1	38480000	38520000	0.00318297	0.514575	0.699788	0.171349	0.250747
chr1	38520000	38560000	0.00310166	0.5013	0.53453	0.494614	0.298313
chr1	38560000	38600000	0.003139	0.50175	0.429099	0.731545	0.321818
chr1	38600000	38640000	0.00340566	0.4622	0.371392	0.826125	0.321736
chr1	38640000	38680000	0.00302949	0.483375	0.324418	0.915444	0.352642
chr1	38680000	38720000	0.00312375	0.4776	0.316191	0.938891	0.343104
chr1	38720000	38760000	0.00314302	0.479475	0.296122	0.93606	0.342608
chr1	38760000	38800000	0.00330256	0.4063	0.282829	0.912099	0.345737
chr1	38800000	38840000	0.0031165	0.4402	0.293082	0.891448	0.310344
chr1	38840000	38880000	0.00326708	0.384025	0.305601	0.852128	0.324633
chr1	38880000	38920000	0.00355022	0.4294	0.334493	0.787588	0.328546
chr1	38920000	38960000	0.00329083	0.44055	0.408966	0.67034	0.270964
chr1	38960000	39000000	0.00336606	0.439425	0.529546	0.513414	0.224301
chr1	39000000	39040000	0.00327443	0.4587	0.587808	0.432903	0.211679
chr1	39040000	39080000	0.00313407	0.458025	0.421872	0.591535	0.302094
chr1	39080000	39120000	0.00339887	0.451375	0.320834	0.911604	0.354203
chr1	39120000	39160000	0.0034675	0.427075	0.294109	1.05189	0.367738
chr1	39160000	39200000	0.00323906	0.440125	0.305086	1.03638	0.359626
chr1	39200000	39240000	0.00325115	0.4659	0.340697	0.978846	0.374743
chr1	39240000	39280000	0.00325077	0.452275	0.415144	0.777937	0.362213
chr1	39280000	39320000	0.00302236	0.43495	0.538908	0.399024	0.350685
chr1	39320000	39360000	0.00334327	0.4294	0.7002	0.15332	0.323206
chr1	39360000	39400000	0.00370067	0.448875	0.657817	0.267201	0.322783
chr1	39400000	39440000	0.00344578	0.46345	0.691777	0.213335	0.312532
chr1	39440000	39480000	0.00345578	0.446525	0.784522	0.0152044	0.283096
chr1	39480000	39520000	0.00352355	0.4589	0.769045	-0.0137913	0.28887
chr1	39520000	39560000	0.00344741	0.47585	0.669444	0.00773345	0.359828
chr1	39560000	39600000	0.00326651	0.45315	0.684098	-0.0968558	0.369868
chr1	39600000	39640000	0.0034786	0.428275	0.722347	-0.0870564	0.330455
chr1	39640000	39680000	0.00350649	0.427775	0.816729	-0.244104	0.287117
chr1	39680000	39720000	0.00366149	0.430975	0.849036	-0.203671	0.279214
chr1	39720000	39760000	0.00328047	0.40825	0.720883	-0.163713	0.340383
chr1	39760000	39800000	0.00344436	0.40015	0.731985	-0.0917183	0.355896
chr1	39800000	39840000	0.00343912	0.418575	0.71757	-0.0623043	0.356307
chr1	39840000	39880000	0.00337341	0.44235	0.731244	-0.0886617	0.330492
chr1	39880000	39920000	0.0036839	0.392875	0.737324	-0.0403013	0.37076
chr1	39920000	39960000	0.00339899	0.4535	0.726494	-0.028573	0.383439
chr1	39960000	40000000	NA	0.533775	NA	NA	NA
chr1	40000000	40040000	0.00322575	0.456	0.743299	-0.080621	0.435206
chr1	40040000	40080000	0.00338604	0.484575	0.734175	-0.0701232	0.422445
chr1	40080000	40120000	0.00346643	0.506525	0.743863	-0.0318336	0.390295
chr1	40120000	40160000	0.00326124	0.52415	0.7844	-0.061367	0.39726
chr1	40160000	40200000	0.00349336	0.42505	0.716697	-0.0744667	0.41698
chr1	40200000	40240000	0.00433858	0.501175	0.791449	-0.0862333	0.438546
chr1	40240000	40280000	0.0038463	0.5006	0.724583	-0.0738948	0.418325
chr1	40280000	40320000	0.00323789	0.45065	0.749695	-0.0880961	0.39344
chr1	40320000	40360000	0.00356605	0.4353	0.781187	-0.111854	0.376126
chr1	40360000	40400000	0.00330278	0.492325	0.722259	-0.0902513	0.376073
chr1	40400000	40440000	0.00335474	0.503825	0.768918	-0.121146	0.378983
chr1	40440000	40480000	0.00360569	0.444275	0.722489	-0.089408	0.395169
chr1	40480000	40520000	0.0034193	0.4348	0.806064	-0.219332	0.341333
chr1	40520000	40560000	0.003416	0.43065	0.80496	-0.263703	0.321456
chr1	40560000	40600000	0.00330599	0.414	0.714747	-0.21568	0.326356
chr1	40600000	40640000	0.00344111	0.4131	0.675936	-0.272594	0.283242
chr1	40640000	40680000	0.00340534	0.3917	0.777263	-0.247032	0.206043
chr1	40680000	40720000	0.00347655	0.412075	0.794442	-0.255446	0.170905
chr1	40720000	40760000	0.00329811	0.4092	0.752995	-0.261941	0.220793
chr1	40760000	40800000	0.00324259	0.501075	0.694231	-0.270087	0.269984
chr1	40800000	40840000	0.00392828	0.4362	0.745444	-0.3007	0.239606
chr1	40840000	40880000	0.00365227	0.41125	0.774046	-0.313489	0.196947
chr1	40880000	40920000	0.00338545	0.424375	0.709745	-0.254963	0.218672
chr1	40920000	40960000	0.00361181	0.4094	0.771357	-0.226805	0.155191
chr1	40960000	41000000	0.00343669	0.425225	0.747414	-0.183557	0.171206
chr1	41000000	41040000	0.00359456	0.412775	0.693736	-0.0652083	0.22445
chr1	41040000	41080000	0.00358699	0.436625	0.656051	-0.0642822	0.27934
chr1	41080000	41120000	0.00325454	0.490375	0.67682	-0.0794329	0.23808
chr1	41120000	41160000	0.00317732	0.4769	0.730962	-0.143427	0.216356
chr1	41160000	41200000	0.00338232	0.4181	0.786877	-0.166311	0.157331
chr1	41200000	41240000	0.00315903	0.433675	0.716039	-0.145967	0.171535
chr1	41240000	41280000	0.0030962	0.543	0.7685	-0.147185	0.17324
chr1	41280000	41320000	0.00312252	0.5275	0.709222	-0.148736	0.220413
chr1	41320000	41360000	0.00330239	0.491175	0.719933	-0.069704	0.221515
chr1	41360000	41400000	0.00321492	0.46845	0.686615	0.0507517	0.192772
chr1	41400000	41440000	0.00321574	0.44755	0.661781	-0.00476593	0.208133
chr1	41440000	41480000	0.00313836	0.4561	0.768565	-0.00123101	0.119813
chr1	41480000	41520000	0.00321188	0.486475	0.624588	0.23945	0.00654078
chr1	41520000	41560000	0.00356417	0.39145	0.540002	0.358821	0.0106335
chr1	41560000	41600000	0.00324052	0.3824	0.482692	0.366871	-0.00446811
chr1	41600000	41640000	0.00328163	0.377175	0.474264	0.375045	-0.00363657
chr1	41640000	41680000	0.00391396	0.386675	0.489918	0.335822	-0.0104607
chr1	41680000	41720000	0.00326675	0.402625	0.548025	0.23881	-0.0089359
chr1	41720000	41760000	0.00331426	0.4698	0.439736	0.315726	0.0762513
chr1	41760000	41800000	0.0032837	0.4576	0.4453	0.3398	0.0451299
chr1	41800000	41840000	0.00324845	0.50395	0.545889	0.265691	-0.0160406
chr1	41840000	41880000	0.00322809	0.537575	0.479935	0.279812	0.0466824
chr1	41880000	41920000	0.00315022	0.5233	0.41533	0.344359	0.0604464
chr1	41920000	41960000	0.00287754	0.528075	0.409862	0.370688	-0.0119258
chr1	41960000	42000000	0.00330875	0.561925	0.402586	0.26645	-0.112728
chr1	42000000	42040000	0.00315648	0.482825	0.351249	0.17353	-0.144019
chr1	42040000	42080000	0.00288748	0.4697	0.437106	0.0361227	-0.129883
chr1	42080000	42120000	0.00301351	0.473175	0.536728	-0.070623	-0.128601
chr1	42120000	42160000	0.00316397	0.504275	0.629189	-0.200505	-0.121191
chr1	42160000	42200000	0.00308743	0.5063	0.641208	-0.16158	-0.139883
chr1	42200000	42240000	0.00332696	0.47825	0.611865	-0.19649	-0.0926036
chr1	42240000	42280000	0.00308882	0.470875	0.589112	-0.194646	-0.0719064
chr1	42280000	42320000	0.00316754	0.455575	0.557491	-0.10964	-0.0945189
chr1	42320000	42360000	0.0031237	0.4523	0.562644	-0.138032	-0.0820107
chr1	42360000	42400000	0.00327441	0.41625	0.598778	-0.141791	-0.0598819
chr1	42400000	42440000	0.00318904	0.41735	0.561676	-0.0762496	-0.0752595
chr1	42440000	42480000	0.00370416	0.414125	0.556251	-0.0432154	-0.0612221
chr1	42480000	42520000	0.00337288	0.42065	0.533137	-0.0576729	-0.0273571
chr1	42520000	42560000	0.00368162	0.37275	0.483378	0.0875646	0.00853033
chr1	42560000	42600000	0.00338611	0.40685	0.465111	0.125235	0.0416355
chr1	42600000	42640000	0.00314476	0.5008	0.46209	0.0775702	0.119789
chr1	42640000	42680000	0.00313028	0.3943	0.516922	0.0507201	0.0685711
chr1	42680000	42720000	0.00356285	0.384725	0.600777	0.0548614	0.0248049
chr1	42720000	42760000	0.00337969	0.37305	0.633579	-0.00708577	0.047009
chr1	42760000	42800000	0.00351371	0.383125	0.636551	-0.0421342	0.0447301
chr1	42800000	42840000	0.00311962	0.4282	0.592863	0.0214008	0.149527
chr1	42840000	42880000	0.00330577	0.44	0.560162	0.121638	0.142701
chr1	42880000	42920000	0.00307934	0.424925	0.591915	0.0916379	0.167048
chr1	42920000	42960000	0.00322732	0.400325	0.61936	0.0614593	0.177293
chr1	42960000	43000000	0.00350546	0.3909	0.548643	0.179552	0.216137
chr1	43000000	43040000	0.0034665	0.38035	0.537812	0.12537	0.256221
chr1	43040000	43080000	0.00318769	0.40135	0.560484	0.101902	0.289537
chr1	43080000	43120000	0.00352555	0.407625	0.633654	0.0526863	0.237332
chr1	43120000	43160000	0.00315789	0.43495	0.764404	-0.104516	0.21139
chr1	43160000	43200000	0.00340813	0.42535	0.683474	-0.00978748	0.282898
chr1	43200000	43240000	0.00294409	0.5099	0.648343	-0.00892689	0.313856
chr1	43240000	43280000	0.00335015	0.44565	0.6796	0.0345557	0.331601
chr1	43280000	43320000	0.00321694	0.4373	0.70402	0.0399285	0.324572
chr1	43320000	43360000	0.00340436	0.430425	0.613272	0.168222	0.392724
chr1	43360000	43400000	0.0033332	0.452675	0.616152	0.0467543	0.384325
chr1	43400000	43440000	0.00315779	0.510625	0.750919	0.0123016	0.333058
chr1	43440000	43480000	0.00354252	0.478075	0.640155	0.208811	0.35995
chr1	43480000	43520000	0.00321831	0.476275	0.621126	0.232764	0.390063
chr1	43520000	43560000	0.00334151	0.463675	0.559844	0.155834	0.399679
chr1	43560000	43600000	0.00384769	0.41095	0.577056	0.332234	0.44356
chr1	43600000	43640000	0.003365	0.428875	0.637763	0.24067	0.469658
chr1	43640000	43680000	0.00329808	0.4181	0.619976	0.253887	0.499738
chr1	43680000	43720000	0.00290906	0.463775	0.571438	0.229675	0.521468
chr1	43720000	43760000	0.00338035	0.502475	0.655139	0.259028	0.518933
chr1	43760000	43800000	0.00308906	0.503825	0.67008	0.241689	0.532926
chr1	43800000	43840000	0.00312999	0.499225	0.766327	0.0589601	0.497108
chr1	43840000	43880000	0.00316701	0.450825	0.709543	0.0786438	0.522105
chr1	43880000	43920000	0.00305005	0.5365	0.668573	0.164428	0.534237
chr1	43920000	43960000	0.00332771	0.41635	0.63946	0.287924	0.547871
chr1	43960000	44000000	0.00336218	0.4854	0.579675	0.337333	0.548154
chr1	44000000	44040000	0.00307527	0.553175	0.598119	0.414464	0.534363
chr1	44040000	44080000	0.00312397	0.563075	0.617697	0.475286	0.531657
chr1	44080000	44120000	0.00346131	0.4849	0.650843	0.312181	0.497311
chr1	44120000	44160000	0.00306229	0.470775	0.704221	0.220972	0.47511
chr1	44160000	44200000	0.00298752	0.451375	0.705286	0.209263	0.482147
chr1	44200000	44240000	0.00327357	0.40965	0.625162	0.305617	0.449606
chr1	44240000	44280000	0.00314886	0.425275	0.621585	0.394684	0.459884
chr1	44280000	44320000	0.00333903	0.4209	0.622016	0.441268	0.429708
chr1	44320000	44360000	0.00302775	0.4654	0.625409	0.417261	0.46277
chr1	44360000	44400000	0.00325531	0.505725	0.635259	0.330659	0.513668
chr1	44400000	44440000	0.00287167	0.522975	0.781714	0.0950526	0.510691
chr1	44440000	44480000	0.00303036	0.56965	0.796483	0.129472	0.543394
chr1	44480000	44520000	0.00307965	0.507725	0.735788	0.211681	0.51422
chr1	44520000	44560000	0.00310164	0.437775	0.590357	0.507691	0.508402
chr1	44560000	44600000	0.00352653	0.44185	0.54121	0.653453	0.505592
chr1	44600000	44640000	0.00349465	0.430575	0.558906	0.694874	0.493844
chr1	44640000	44680000	0.00315153	0.40535	0.608405	0.523033	0.478166
chr1	44680000	44720000	0.00276711	0.5139	0.64148	0.488528	0.454757
chr1	44720000	44760000	0.00305692	0.474675	0.635458	0.573088	0.476893
chr1	44760000	44800000	0.00315648	0.470575	0.649175	0.472401	0.458418
chr1	44800000	44840000	0.00313894	0.458525	0.673176	0.392137	0.485142
chr1	44840000	44880000	0.00316454	0.431625	0.659093	0.435153	0.483314
chr1	44880000	44920000	0.00349533	0.427	0.611683	0.57042	0.492664
chr1	44920000	44960000	0.00331011	0.4223	0.56279	0.645821	0.504852
chr1	44960000	45000000	0.00321253	0.468425	0.583825	0.649882	0.522489
chr1	45000000	45040000	0.00319904	0.4866	0.6064	0.561744	0.518534
chr1	45040000	45080000	0.00326387	0.49565	0.649568	0.431795	0.560399
chr1	45080000	45120000	0.00306983	0.52605	0.789261	0.183873	0.607202
chr1	45120000	45160000	0.00345528	0.480075	0.82995	0.0294103	0.622159
chr1	45160000	45200000	0.0035822	0.47865	0.85102	-0.175392	0.67264
chr1	45200000	45240000	0.00367436	0.49055	0.879321	-0.232574	0.673221
chr1	45240000	45280000	0.00386755	0.526425	0.882627	-0.321713	0.697021
chr1	45280000	45320000	0.00344159	0.50815	0.769257	-0.183162	0.633429
chr1	45320000	45360000	0.00336492	0.447175	0.745476	0.00133751	0.573002
chr1	45360000	45400000	0.00341305	0.41165	0.752892	0.0291483	0.563864
chr1	45400000	45440000	0.00338831	0.41015	0.751435	-0.0548729	0.549922
chr1	45440000	45480000	0.00306883	0.4774	0.712593	-0.164335	0.583213
chr1	45480000	45520000	0.00323804	0.429225	0.683503	-0.127972	0.520613
chr1	45520000	45560000	0.00382566	0.411	0.698157	-0.0028057	0.471425
chr1	45560000	45600000	0.00409415	0.408925	0.671052	0.0519992	0.457188
chr1	45600000	45640000	0.00352817	0.37785	0.677647	0.0496848	0.485952
chr1	45640000	45680000	0.00402688	0.40485	0.693676	-0.00819873	0.493217
chr1	45680000	45720000	0.00326966	0.426325	0.703687	-0.00829852	0.489379
chr1	45720000	45760000	0.00367678	0.42705	0.677868	-0.0448016	0.519604
chr1	45760000	45800000	0.00332217	0.4773	0.74628	-0.222422	0.586816
chr1	45800000	45840000	0.00328171	0.457625	0.726629	-0.191518	0.55735
chr1	45840000	45880000	0.00341867	0.414025	0.733546	-0.0739017	0.505994
chr1	45880000	45920000	0.00338561	0.409975	0.742026	-0.0372505	0.504986
chr1	45920000	45960000	0.00338458	0.42875	0.738336	-0.14855	0.543336
chr1	45960000	46000000	0.00370599	0.478375	0.82803	-0.243321	0.544677
chr1	46000000	46040000	0.00362634	0.4736	0.883713	-0.237338	0.547354
chr1	46040000	46080000	0.00380465	0.434125	0.841315	-0.183676	0.518765
chr1	46080000	46120000	0.00338132	0.43785	0.855906	-0.0818139	0.477314
chr1	46120000	46160000	0.00328436	0.420425	0.901485	-0.110257	0.460859
chr1	46160000	46200000	0.00367013	0.42055	0.856647	-0.0204986	0.400512
chr1	46200000	46240000	0.00347454	0.43985	0.819958	0.0527917	0.375203
chr1	46240000	46280000	0.00349383	0.44245	0.815697	0.0985877	0.352206
chr1	46280000	46320000	0.0036562	0.3929	0.746144	0.17534	0.34843
chr1	46320000	46360000	0.0037315	0.3832	0.712045	0.2661	0.338133
chr1	46360000	46400000	0.00361282	0.407	0.692104	0.379146	0.309736
chr1	46400000	46440000	0.00365582	0.400625	0.663933	0.432364	0.322681
chr1	46440000	46480000	0.00323516	0.42	0.6724	0.358042	0.300518
chr1	46480000	46520000	0.00312071	0.4619	0.699611	0.171375	0.320333
chr1	46520000	46560000	0.00373177	0.39935	0.795247	0.186199	0.301559
chr1	46560000	46600000	0.00340933	0.40645	0.827402	0.160534	0.277992
chr1	46600000	46640000	0.00325541	0.459575	0.785751	0.101139	0.30775
chr1	46640000	46680000	0.00316002	0.506575	0.841398	0.0659593	0.327144
chr1	46680000	46720000	0.00343811	0.48305	0.885449	0.113199	0.325838
chr1	46720000	46760000	0.00325343	0.467075	0.978315	0.149538	0.249839
chr1	46760000	46800000	0.00338059	0.467475	1.03379	0.148612	0.115219
chr1	46800000	46840000	0.00334746	0.4626	0.905776	0.394397	-0.00715449
chr1	46840000	46880000	0.00338629	0.5056	0.713384	0.796664	-0.0250761
chr1	46880000	46920000	0.00292573	0.523475	0.564504	0.978056	-0.0799576
chr1	46920000	46960000	0.00319904	0.5443	0.53922	1.02448	-0.124173
chr1	46960000	47000000	0.00328452	0.524225	0.507471	1.04531	-0.13731
chr1	47000000	47040000	0.00302909	0.509275	0.576366	0.907222	-0.16111
chr1	47040000	47080000	0.00298547	0.477225	0.705251	0.700105	-0.304108
chr1	47080000	47120000	0.00338583	0.438725	0.727331	0.659789	-0.421819
chr1	47120000	47160000	0.00346227	0.4178	0.721619	0.654467	-0.475281
chr1	47160000	47200000	0.00343543	0.417125	0.535137	0.843376	-0.426429
chr1	47200000	47240000	0.00349441	0.42855	0.0761869	1.53812	-0.272517
chr1	47240000	47280000	0.003913	0.432725	-0.191959	1.90154	-0.150845
chr1	47280000	47320000	0.00468344	0.414525	-0.299566	1.87782	-0.0652367
chr1	47320000	47360000	NA	0.398575	NA	NA	NA
chr1	47360000	47400000	NA	0.416375	NA	NA	NA
chr1	47400000	47440000	NA	0.4319	NA	NA	NA
chr1	47440000	47480000	0.0042969	0.414575	-0.53355	1.87468	0.042724
chr1	47480000	47520000	0.00368687	0.396875	-0.529006	1.84924	0.0268882
chr1	47520000	47560000	NA	0.39135	NA	NA	NA
chr1	47560000	47600000	NA	0.3906	NA	NA	NA
chr1	47600000	47640000	NA	0.432825	NA	NA	NA
chr1	47640000	47680000	0.00304808	0.50725	0.0164509	1.27127	-0.414141
chr1	47680000	47720000	0.00317704	0.4867	0.135094	1.15429	-0.604965
chr1	47720000	47760000	0.00325088	0.395875	0.325755	0.877658	-0.720533
chr1	47760000	47800000	0.00335332	0.437525	0.596225	0.598189	-0.931035
chr1	47800000	47840000	0.00342923	0.426925	0.415338	0.727284	-0.841169
chr1	47840000	47880000	0.00330732	0.44775	0.172187	1.01989	-0.621269
chr1	47880000	47920000	0.0029132	0.522375	0.141855	0.993826	-0.673265
chr1	47920000	47960000	0.00323837	0.4719	-0.14543	1.32307	-0.408072
chr1	47960000	48000000	0.00319527	0.4567	-0.257714	1.40893	-0.2913
chr1	48000000	48040000	0.00332028	0.490275	-0.357811	1.53531	-0.247441
chr1	48040000	48080000	0.00328425	0.450425	-0.399251	1.58133	-0.198453
chr1	48080000	48120000	0.00321614	0.494125	-0.407777	1.59936	-0.174859
chr1	48120000	48160000	0.00335201	0.45255	-0.354238	1.54298	-0.206805
chr1	48160000	48200000	0.00301442	0.490775	-0.25504	1.41711	-0.264834
chr1	48200000	48240000	0.00303798	0.4823	-0.437677	1.67646	-0.211704
chr1	48240000	48280000	0.00300973	0.51775	-0.519118	1.78957	-0.155753
chr1	48280000	48320000	0.00326102	0.498225	-0.586335	1.79374	-0.154133
chr1	48320000	48360000	0.00301126	0.46405	-0.651181	1.74647	-0.17077
chr1	48360000	48400000	0.00311864	0.490725	-0.668325	1.71605	-0.156943
chr1	48400000	48440000	0.0037401	0.454725	-0.674482	1.59401	-0.176963
chr1	48440000	48480000	0.00308493	0.467325	-0.623477	1.4713	-0.316133
chr1	48480000	48520000	0.00310396	0.468275	-0.679579	1.40432	-0.272281
chr1	48520000	48560000	0.0029715	0.4495	-0.650576	1.29395	-0.341333
chr1	48560000	48600000	0.0038222	0.408625	-0.652509	1.16798	-0.29874
chr1	48600000	48640000	0.00442829	0.385225	-0.767162	1.17682	-0.296254
chr1	48640000	48680000	0.00391002	0.423975	-0.624662	1.08475	-0.366716
chr1	48680000	48720000	0.00309612	0.4782	-0.541133	1.05286	-0.54982
chr1	48720000	48760000	0.00403535	0.39305	-0.779241	1.07367	-0.326661
chr1	48760000	48800000	0.0035925	0.3674	-0.851274	1.02569	-0.267743
chr1	48800000	48840000	0.00403747	0.3538	-0.839124	0.976627	-0.35195
chr1	48840000	48880000	0.00364613	0.381075	-0.759302	0.941765	-0.49151
chr1	48880000	48920000	0.00366629	0.380225	-0.639621	0.909297	-0.69171
chr1	48920000	48960000	0.00343843	0.393125	-0.426237	0.821241	-0.961724
chr1	48960000	49000000	0.00345909	0.4224	-0.649414	0.991962	-0.650715
chr1	49000000	49040000	0.00321467	0.44235	-0.832207	1.06505	-0.408963
chr1	49040000	49080000	0.00327961	0.4301	-0.852981	1.04469	-0.353848
chr1	49080000	49120000	0.00302563	0.436525	-0.878704	1.0702	-0.345817
chr1	49120000	49160000	0.00301761	0.4648	-0.791281	1.00678	-0.413949
chr1	49160000	49200000	0.00326221	0.446775	-0.724026	0.952588	-0.586753
chr1	49200000	49240000	0.0030381	0.435975	-0.618625	0.874818	-0.821512
chr1	49240000	49280000	0.00342857	0.42405	-0.687618	0.864067	-0.697503
chr1	49280000	49320000	0.00323564	0.395525	-0.929517	0.8845	-0.388285
chr1	49320000	49360000	0.00319192	0.399575	-1.02951	0.855927	-0.222903
chr1	49360000	49400000	0.00319628	0.396575	-1.11172	0.86793	-0.0919287
chr1	49400000	49440000	0.00328188	0.406075	-1.1914	0.838207	0.00578348
chr1	49440000	49480000	0.00411895	0.39125	-1.26228	0.747053	0.0609366
chr1	49480000	49520000	0.00340035	0.390275	-1.27284	0.727677	0.0907484
chr1	49520000	49560000	0.00376103	0.395725	-1.3449	0.701716	0.163357
chr1	49560000	49600000	0.00372875	0.38605	-1.2896	0.657837	0.203319
chr1	49600000	49640000	0.00345695	0.383475	-1.32725	0.636657	0.196308
chr1	49640000	49680000	0.00313965	0.3828	-1.34171	0.609426	0.190865
chr1	49680000	49720000	0.00332485	0.374725	-1.33139	0.552137	0.248136
chr1	49720000	49760000	0.00442816	0.37995	-1.33362	0.525549	0.236852
chr1	49760000	49800000	0.00371628	0.3801	-1.30898	0.539627	0.217717
chr1	49800000	49840000	0.00324307	0.384225	-1.33655	0.541533	0.205561
chr1	49840000	49880000	0.00349246	0.370525	-1.35018	0.534447	0.231139
chr1	49880000	49920000	0.00335062	0.3744	-1.3491	0.494253	0.250106
chr1	49920000	49960000	0.00338279	0.360525	-1.33212	0.495796	0.293151
chr1	49960000	50000000	0.00403676	0.366675	-1.31438	0.500486	0.297862
chr1	50000000	50040000	0.00415507	0.397425	-1.32793	0.526284	0.274354
chr1	50040000	50080000	0.00348333	0.385275	-1.36334	0.530166	0.281164
chr1	50080000	50120000	0.00346354	0.3702	-1.36098	0.512743	0.301589
chr1	50120000	50160000	0.0037109	0.3585	-1.39318	0.475504	0.341659
chr1	50160000	50200000	0.00345389	0.35405	-1.38258	0.475189	0.330447
chr1	50200000	50240000	0.00389904	0.37655	-1.35719	0.458646	0.305501
chr1	50240000	50280000	0.00351127	0.349675	-1.40215	0.487498	0.305984
chr1	50280000	50320000	0.0036697	0.38165	-1.35662	0.519147	0.279955
chr1	50320000	50360000	0.0044319	0.3715	-1.32262	0.541859	0.267422
chr1	50360000	50400000	0.00376633	0.374325	-1.33396	0.520059	0.240037
chr1	50400000	50440000	0.00439358	0.3596	-1.33325	0.546469	0.202412
chr1	50440000	50480000	0.0035885	0.3705	-1.28626	0.578544	0.145748
chr1	50480000	50520000	0.00316744	0.3885	-1.19184	0.664674	0.0509699
chr1	50520000	50560000	0.00320757	0.4007	-1.143	0.752918	-0.0853815
chr1	50560000	50600000	0.00309147	0.379625	-1.05934	0.76524	-0.179183
chr1	50600000	50640000	0.00319071	0.405425	-1.07032	0.843566	-0.1643
chr1	50640000	50680000	0.00334995	0.4212	-1.04809	0.86797	-0.172752
chr1	50680000	50720000	0.00335308	0.442325	-1.04734	0.932932	-0.185874
chr1	50720000	50760000	0.00314126	0.449975	-0.995854	0.961937	-0.203414
chr1	50760000	50800000	0.00313152	0.449575	-0.913445	0.914443	-0.24741
chr1	50800000	50840000	0.00318427	0.45215	-0.739874	0.869701	-0.395114
chr1	50840000	50880000	0.00363394	0.39495	-0.652844	0.807155	-0.592033
chr1	50880000	50920000	0.00307042	0.4836	-0.467769	0.718786	-0.894432
chr1	50920000	50960000	0.00318435	0.383775	-0.393964	0.646229	-0.959728
chr1	50960000	51000000	0.00357275	0.3722	-0.361771	0.62949	-0.96338
chr1	51000000	51040000	0.00333571	0.368825	-0.318279	0.621162	-0.95292
chr1	51040000	51080000	0.00335379	0.37405	-0.268913	0.599862	-0.935566
chr1	51080000	51120000	0.00323413	0.393175	-0.213861	0.567947	-0.925813
chr1	51120000	51160000	0.00314218	0.39115	-0.143666	0.545082	-0.956889
chr1	51160000	51200000	0.00378937	0.389675	-0.0424315	0.446048	-0.928496
chr1	51200000	51240000	0.00344971	0.384975	0.0448954	0.340857	-0.86004
chr1	51240000	51280000	0.00326152	0.36995	0.103096	0.306984	-0.839914
chr1	51280000	51320000	0.00319236	0.3626	0.076894	0.324987	-0.91143
chr1	51320000	51360000	0.00409559	0.37625	0.104536	0.292288	-0.847652
chr1	51360000	51400000	0.0037423	0.3878	0.194012	0.218426	-0.899369
chr1	51400000	51440000	0.00324169	0.416075	0.463142	0.0459813	-1.09922
chr1	51440000	51480000	0.00338167	0.38795	0.271508	0.186376	-0.89603
chr1	51480000	51520000	0.00343478	0.376825	0.0617425	0.340417	-0.724531
chr1	51520000	51560000	0.00325321	0.40375	-0.0424099	0.415821	-0.676243
chr1	51560000	51600000	0.00317413	0.38645	-0.0402016	0.412514	-0.669596
chr1	51600000	51640000	0.00329386	0.39475	0.0690292	0.335151	-0.687323
chr1	51640000	51680000	0.0029559	0.42655	0.204396	0.252627	-0.701628
chr1	51680000	51720000	0.00305876	0.434875	0.460239	0.180839	-0.935456
chr1	51720000	51760000	0.00306772	0.42395	0.467713	0.220527	-0.833551
chr1	51760000	51800000	0.00307932	0.52215	0.426731	0.275466	-0.731319
chr1	51800000	51840000	0.00317928	0.4358	0.450621	0.248718	-0.673226
chr1	51840000	51880000	0.00353245	0.39075	0.515163	0.178473	-0.653785
chr1	51880000	51920000	0.00340953	0.36435	0.607785	0.0780187	-0.644457
chr1	51920000	51960000	0.00365574	0.381225	0.638923	0.0319008	-0.614599
chr1	51960000	52000000	0.00358008	0.39735	0.726731	-0.0313454	-0.619325
chr1	52000000	52040000	0.00311642	0.427225	0.679114	-0.0236017	-0.527039
chr1	52040000	52080000	0.00322718	0.438325	0.676008	0.019338	-0.525722
chr1	52080000	52120000	0.00295013	0.400775	0.659706	0.0267	-0.472072
chr1	52120000	52160000	0.00316627	0.38965	0.642629	0.0604929	-0.454507
chr1	52160000	52200000	0.00364067	0.40385	0.723653	0.00449778	-0.525779
chr1	52200000	52240000	0.00334531	0.367225	0.702648	0.00647146	-0.42597
chr1	52240000	52280000	0.00338925	0.400525	0.693413	0.0665918	-0.410112
chr1	52280000	52320000	0.00331471	0.37755	0.724262	0.0614904	-0.424285
chr1	52320000	52360000	0.00300981	0.41265	0.771017	0.0183405	-0.353465
chr1	52360000	52400000	0.00335029	0.441675	0.596279	0.176726	-0.227857
chr1	52400000	52440000	0.00344838	0.4384	0.606979	0.256323	-0.266242
chr1	52440000	52480000	0.00345623	0.45635	0.638677	0.147101	-0.217204
chr1	52480000	52520000	0.00315068	0.42945	0.772906	0.0257219	-0.219739
chr1	52520000	52560000	0.00370906	0.419575	0.781993	0.00500917	-0.199877
chr1	52560000	52600000	0.00339136	0.4315	0.732049	0.0294244	-0.150647
chr1	52600000	52640000	0.00346577	0.419725	0.733037	0.067098	-0.151608
chr1	52640000	52680000	0.00367269	0.4162	0.633994	0.201672	-0.145589
chr1	52680000	52720000	0.00332516	0.40095	0.633938	0.204217	-0.156189
chr1	52720000	52760000	0.00332826	0.3822	0.653612	0.125576	-0.129555
chr1	52760000	52800000	0.00326213	0.421875	0.695571	0.0827481	-0.0332296
chr1	52800000	52840000	0.00335654	0.475325	0.825553	-0.0621775	-0.00916174
chr1	52840000	52880000	0.00357499	0.4417	0.891935	-0.172135	-0.0263791
chr1	52880000	52920000	0.00357407	0.3898	0.872277	-0.152198	-0.0282058
chr1	52920000	52960000	0.00358007	0.36915	0.850123	-0.137788	-0.0370333
chr1	52960000	53000000	0.00342475	0.38565	0.876289	-0.142134	-0.0515269
chr1	53000000	53040000	0.00344402	0.420875	0.883943	-0.171293	-0.0346215
chr1	53040000	53080000	0.00331964	0.453925	0.886938	-0.1158	-0.0488587
chr1	53080000	53120000	0.00347501	0.4531	0.912435	-0.167212	-0.0710217
chr1	53120000	53160000	0.00314593	0.4614	0.785296	-0.124705	0.00993668
chr1	53160000	53200000	0.00328591	0.45155	0.865164	-0.0500171	-0.0920685
chr1	53200000	53240000	0.00332312	0.4267	0.779235	0.0934634	-0.114352
chr1	53240000	53280000	0.00325358	0.398025	0.703205	0.208644	-0.117819
chr1	53280000	53320000	0.00342379	0.43705	0.674382	0.293608	-0.11931
chr1	53320000	53360000	0.00354787	0.429025	0.630696	0.348829	-0.150265
chr1	53360000	53400000	0.00309004	0.461525	0.726384	0.269385	-0.173262
chr1	53400000	53440000	0.003087	0.398825	0.674994	0.341257	-0.1703
chr1	53440000	53480000	0.00365284	0.40165	0.63955	0.426201	-0.173999
chr1	53480000	53520000	0.00311968	0.39665	0.645716	0.457026	-0.199634
chr1	53520000	53560000	0.00296456	0.543675	0.555414	0.68551	-0.125048
chr1	53560000	53600000	0.00368963	0.535425	0.551999	0.69421	-0.112258
chr1	53600000	53640000	0.00342434	0.444275	0.576277	0.611271	-0.14686
chr1	53640000	53680000	0.00316155	0.456	0.74286	0.330715	-0.210799
chr1	53680000	53720000	0.00308117	0.432625	0.776506	0.356306	-0.293283
chr1	53720000	53760000	0.0031666	0.509925	0.555052	0.612818	-0.227128
chr1	53760000	53800000	0.00291452	0.558825	0.685814	0.523453	-0.347064
chr1	53800000	53840000	0.00316165	0.475525	0.644123	0.62467	-0.336867
chr1	53840000	53880000	0.00287738	0.496425	0.518095	0.675979	-0.203145
chr1	53880000	53920000	0.00375719	0.427275	0.437653	0.884718	-0.217493
chr1	53920000	53960000	0.00326824	0.500825	0.33185	1.0647	-0.124555
chr1	53960000	54000000	0.00310138	0.57145	0.283225	1.23048	-0.113831
chr1	54000000	54040000	0.00309638	0.497875	0.27312	1.27753	-0.103788
chr1	54040000	54080000	0.00299542	0.50565	0.249558	1.26875	-0.132404
chr1	54080000	54120000	0.00309892	0.47855	0.23796	1.26475	-0.107504
chr1	54120000	54160000	0.00295576	0.52965	0.274621	1.21556	-0.130218
chr1	54160000	54200000	0.00315171	0.47765	0.332349	1.1505	-0.186997
chr1	54200000	54240000	0.00321692	0.4353	0.469731	0.876325	-0.267775
chr1	54240000	54280000	0.00292641	0.407475	0.624322	0.56597	-0.322074
chr1	54280000	54320000	0.00320462	0.414575	0.746022	0.319083	-0.318897
chr1	54320000	54360000	0.00313557	0.438675	0.780966	0.189334	-0.271841
chr1	54360000	54400000	0.00343196	0.431275	0.857789	0.228137	-0.42565
chr1	54400000	54440000	0.00317426	0.427875	0.778568	0.205651	-0.285661
chr1	54440000	54480000	0.00325637	0.468175	0.666881	0.430186	-0.254672
chr1	54480000	54520000	0.00341122	0.42395	0.731674	0.327354	-0.306558
chr1	54520000	54560000	0.00310992	0.406525	0.663791	0.252594	-0.233716
chr1	54560000	54600000	0.00303596	0.48915	0.587131	0.388605	-0.241654
chr1	54600000	54640000	0.00314814	0.499175	0.585152	0.419375	-0.257071
chr1	54640000	54680000	0.00299763	0.4828	0.678204	0.197814	-0.2747
chr1	54680000	54720000	0.00314858	0.527625	0.7336	0.156315	-0.308972
chr1	54720000	54760000	0.00322298	0.52025	0.807141	0.0474959	-0.333673
chr1	54760000	54800000	0.00321169	0.506175	0.831782	0.0439231	-0.393468
chr1	54800000	54840000	0.00323861	0.4922	0.844927	0.00174317	-0.396326
chr1	54840000	54880000	0.00323271	0.50605	0.833471	-0.0353182	-0.367129
chr1	54880000	54920000	0.00358007	0.466675	0.764866	0.145672	-0.345297
chr1	54920000	54960000	0.00314768	0.5242	0.727083	0.0667049	-0.257688
chr1	54960000	55000000	0.00329534	0.4815	0.579429	0.321059	-0.22783
chr1	55000000	55040000	0.00342875	0.5009	0.553705	0.517479	-0.343496
chr1	55040000	55080000	0.00314628	0.523575	0.457688	0.727817	-0.308327
chr1	55080000	55120000	0.00386676	0.478475	0.402821	0.752286	-0.300496
chr1	55120000	55160000	0.00306313	0.48335	0.443652	0.628199	-0.301447
chr1	55160000	55200000	0.00312829	0.456775	0.614385	0.461254	-0.43317
chr1	55200000	55240000	0.00306139	0.4947	0.67413	0.400251	-0.496614
chr1	55240000	55280000	0.00314579	0.519525	0.594074	0.398599	-0.436448
chr1	55280000	55320000	0.00309576	0.463825	0.417774	0.705919	-0.462319
chr1	55320000	55360000	0.00326639	0.462025	0.428916	0.732256	-0.627844
chr1	55360000	55400000	0.00379296	0.44765	0.276813	0.891842	-0.62018
chr1	55400000	55440000	0.00336942	0.439975	0.159762	0.942747	-0.605335
chr1	55440000	55480000	0.00305566	0.526625	0.141883	1.002	-0.635592
chr1	55480000	55520000	0.00383615	0.508175	0.186639	0.860467	-0.7025
chr1	55520000	55560000	0.00326457	0.448875	0.369191	0.581786	-0.961472
chr1	55560000	55600000	0.00327253	0.377975	0.407794	0.376095	-1.08208
chr1	55600000	55640000	0.00330743	0.3544	0.493097	0.187435	-1.13446
chr1	55640000	55680000	0.0032864	0.3782	0.630979	0.101793	-1.30459
chr1	55680000	55720000	0.00328162	0.42835	0.525401	0.198006	-1.19362
chr1	55720000	55760000	0.00317083	0.42615	0.276541	0.311523	-0.952332
chr1	55760000	55800000	0.00321962	0.452525	-0.0475355	0.673301	-0.817483
chr1	55800000	55840000	0.00344243	0.43095	-0.248346	0.810253	-0.658
chr1	55840000	55880000	0.0031405	0.41755	-0.434057	0.856682	-0.527299
chr1	55880000	55920000	0.00346163	0.41215	-0.532893	0.911316	-0.465832
chr1	55920000	55960000	0.00348918	0.416725	-0.585584	0.926013	-0.379099
chr1	55960000	56000000	0.00343191	0.4267	-0.646205	0.927302	-0.313787
chr1	56000000	56040000	0.00351954	0.423325	-0.69641	0.934344	-0.303325
chr1	56040000	56080000	0.00316625	0.415975	-0.687369	0.881552	-0.283393
chr1	56080000	56120000	0.00319942	0.406625	-0.642631	0.837598	-0.37195
chr1	56120000	56160000	0.00394956	0.368925	-0.707581	0.840628	-0.296516
chr1	56160000	56200000	0.00328994	0.425725	-0.81075	0.878279	-0.186311
chr1	56200000	56240000	0.0034738	0.383875	-0.888638	0.846337	-0.0885718
chr1	56240000	56280000	0.0033589	0.407575	-0.894989	0.81678	-0.0627999
chr1	56280000	56320000	0.00316116	0.40695	-0.903089	0.809356	-0.0496627
chr1	56320000	56360000	0.00324793	0.397125	-0.908931	0.786788	-0.0385098
chr1	56360000	56400000	0.00354897	0.37455	-0.95269	0.761627	-0.0167048
chr1	56400000	56440000	0.00341699	0.393175	-0.953999	0.734556	-0.00930244
chr1	56440000	56480000	0.00343438	0.38745	-0.971593	0.72473	0.0151568
chr1	56480000	56520000	0.00339578	0.39835	-0.962382	0.719511	-0.0125681
chr1	56520000	56560000	0.00340525	0.39495	-0.965583	0.698641	-0.00703242
chr1	56560000	56600000	0.00339035	0.385875	-0.944495	0.698562	-0.0431801
chr1	56600000	56640000	0.00337079	0.3895	-0.895145	0.655124	-0.0759744
chr1	56640000	56680000	0.00339427	0.388675	-0.911528	0.680378	-0.0741628
chr1	56680000	56720000	0.00357283	0.390475	-0.905247	0.686215	-0.0573086
chr1	56720000	56760000	0.00353313	0.40405	-0.927212	0.71017	-0.0493154
chr1	56760000	56800000	0.00324336	0.410175	-0.891692	0.696252	-0.0766655
chr1	56800000	56840000	0.00372464	0.393475	-0.89692	0.708282	-0.0892493
chr1	56840000	56880000	0.00321599	0.4249	-0.862675	0.747674	-0.08765
chr1	56880000	56920000	0.00305663	0.454775	-0.853781	0.798759	-0.105506
chr1	56920000	56960000	0.00325079	0.426725	-0.828189	0.77091	-0.145407
chr1	56960000	57000000	0.00319991	0.437725	-0.781949	0.75831	-0.215379
chr1	57000000	57040000	0.00307724	0.4182	-0.777045	0.708859	-0.210113
chr1	57040000	57080000	0.00357057	0.405775	-0.782366	0.647769	-0.160124
chr1	57080000	57120000	0.00317572	0.390125	-0.87501	0.659538	-0.134476
chr1	57120000	57160000	0.00338692	0.368025	-0.830777	0.6131	-0.165558
chr1	57160000	57200000	0.00370862	0.354975	-0.799026	0.607415	-0.174524
chr1	57200000	57240000	0.00319827	0.369175	-0.842082	0.65028	-0.254267
chr1	57240000	57280000	0.002907	0.40265	-0.77906	0.639976	-0.273152
chr1	57280000	57320000	0.00310002	0.44865	-0.797054	0.650971	-0.198997
chr1	57320000	57360000	0.00301918	0.388	-0.91471	0.64726	-0.132449
chr1	57360000	57400000	0.00302474	0.43505	-0.968685	0.6723	-0.0736199
chr1	57400000	57440000	0.00304086	0.426975	-1.01833	0.677912	-0.0238094
chr1	57440000	57480000	0.00324039	0.40805	-1.02311	0.682574	-0.00560878
chr1	57480000	57520000	0.00331602	0.429175	-1.05734	0.687817	0.00800497
chr1	57520000	57560000	0.00329147	0.4247	-1.05806	0.666542	0.0369729
chr1	57560000	57600000	0.00327457	0.404375	-1.13138	0.597084	0.0424306
chr1	57600000	57640000	0.00327062	0.39985	-1.11475	0.597171	0.0951609
chr1	57640000	57680000	0.00343783	0.409775	-1.1316	0.6133	0.0768271
chr1	57680000	57720000	0.00350177	0.404175	-1.10923	0.597158	0.0483789
chr1	57720000	57760000	0.00321028	0.413175	-1.12085	0.599718	0.0509434
chr1	57760000	57800000	0.00328408	0.418075	-1.11591	0.595409	0.0597187
chr1	57800000	57840000	0.0034425	0.40265	-1.12341	0.580877	0.0964647
chr1	57840000	57880000	0.00329453	0.40615	-1.1213	0.561296	0.114363
chr1	57880000	57920000	0.00338029	0.39695	-1.15654	0.510422	0.121237
chr1	57920000	57960000	0.00328898	0.392675	-1.16224	0.505485	0.141287
chr1	57960000	58000000	0.00369953	0.392575	-1.16293	0.552326	0.133058
chr1	58000000	58040000	0.00403369	0.417625	-1.17756	0.545038	0.150258
chr1	58040000	58080000	0.00313987	0.413025	-1.11783	0.575247	0.0820235
chr1	58080000	58120000	0.00322303	0.40425	-1.12741	0.574939	0.0854636
chr1	58120000	58160000	0.00338205	0.392225	-1.14362	0.539161	0.130122
chr1	58160000	58200000	0.00359022	0.397875	-1.13576	0.525757	0.0934875
chr1	58200000	58240000	0.00319636	0.4021	-1.09236	0.53842	0.0590323
chr1	58240000	58280000	0.00315899	0.385625	-1.10134	0.523774	0.0629053
chr1	58280000	58320000	0.00332656	0.406025	-1.10032	0.550638	0.0728441
chr1	58320000	58360000	0.00340597	0.404925	-1.06641	0.630569	0.0176113
chr1	58360000	58400000	0.0037468	0.40645	-1.06891	0.598492	-0.00119062
chr1	58400000	58440000	0.00307567	0.41115	-1.02299	0.630316	-0.0328464
chr1	58440000	58480000	0.00324822	0.41235	-0.987129	0.626555	-0.0812774
chr1	58480000	58520000	0.00320164	0.412075	-0.925975	0.628332	-0.126728
chr1	58520000	58560000	0.00330747	0.43465	-0.902344	0.642495	-0.167611
chr1	58560000	58600000	0.00368226	0.416425	-0.914283	0.619613	-0.170684
chr1	58600000	58640000	0.00351079	0.42395	-0.886419	0.606814	-0.186852
chr1	58640000	58680000	0.00329698	0.39325	-0.886879	0.574004	-0.205366
chr1	58680000	58720000	0.00318232	0.425825	-0.824631	0.592693	-0.258628
chr1	58720000	58760000	0.00404501	0.410175	-0.833236	0.587579	-0.313089
chr1	58760000	58800000	0.00330716	0.417825	-0.734396	0.562067	-0.378971
chr1	58800000	58840000	0.0032688	0.410025	-0.66935	0.54248	-0.45093
chr1	58840000	58880000	0.00355375	0.428575	-0.586027	0.509988	-0.582672
chr1	58880000	58920000	0.00297031	0.4344	-0.503744	0.519788	-0.643435
chr1	58920000	58960000	0.00346885	0.4199	-0.313871	0.421956	-0.808359
chr1	58960000	59000000	0.00340568	0.350225	0.00637644	0.197904	-1.0248
chr1	59000000	59040000	0.00308928	0.40555	0.00425286	0.207983	-1.02599
chr1	59040000	59080000	0.00333112	0.4355	-0.144259	0.347703	-0.889527
chr1	59080000	59120000	0.00340337	0.4343	-0.0818883	0.259374	-0.860139
chr1	59120000	59160000	0.00313248	0.354925	0.127483	0.160287	-1.07646
chr1	59160000	59200000	0.00363554	0.40215	0.186135	0.105469	-0.97441
chr1	59200000	59240000	0.00314156	0.42925	0.245338	-0.0128228	-0.80762
chr1	59240000	59280000	0.0031617	0.43765	0.44065	-0.0928807	-0.979031
chr1	59280000	59320000	0.00309059	0.433375	0.416307	-0.052356	-0.929059
chr1	59320000	59360000	0.00339437	0.4289	0.435438	-0.0336704	-0.937154
chr1	59360000	59400000	0.00316539	0.43295	0.466944	-0.0740632	-0.948127
chr1	59400000	59440000	0.00363617	0.436175	0.47959	-0.0758311	-0.935771
chr1	59440000	59480000	0.00331664	0.425975	0.476394	-0.0849095	-0.947659
chr1	59480000	59520000	0.00318602	0.4355	0.491321	-0.0966251	-0.951581
chr1	59520000	59560000	0.00304723	0.42345	0.444724	-0.0571622	-0.905358
chr1	59560000	59600000	0.00354286	0.401275	0.32255	0.00770337	-0.831687
chr1	59600000	59640000	0.00335071	0.4202	0.232995	0.0503527	-0.808851
chr1	59640000	59680000	0.00319131	0.41615	0.113416	0.117135	-0.729765
chr1	59680000	59720000	0.0038907	0.40995	0.087024	0.132623	-0.733654
chr1	59720000	59760000	0.00352655	0.389025	0.146913	0.130313	-0.806492
chr1	59760000	59800000	0.00345082	0.4111	0.153718	0.0883431	-0.828349
chr1	59800000	59840000	0.00389234	0.399725	0.000879727	0.208946	-0.720638
chr1	59840000	59880000	0.00338513	0.391825	-0.0761553	0.218324	-0.692772
chr1	59880000	59920000	0.00307068	0.407375	-0.126557	0.238605	-0.669234
chr1	59920000	59960000	0.00339313	0.3992	-0.182856	0.267656	-0.62438
chr1	59960000	60000000	0.00332339	0.41125	-0.255613	0.302183	-0.57148
chr1	60000000	60040000	0.00371534	0.40315	-0.260931	0.333149	-0.5916
chr1	60040000	60080000	0.00399816	0.413825	-0.281493	0.330976	-0.594455
chr1	60080000	60120000	0.00362586	0.396775	-0.264139	0.327462	-0.607005
chr1	60120000	60160000	0.00326981	0.4182	-0.11686	0.221117	-0.625608
chr1	60160000	60200000	0.00316656	0.4042	-0.0914277	0.221148	-0.661008
chr1	60200000	60240000	0.00329209	0.411225	-0.189901	0.297128	-0.699738
chr1	60240000	60280000	0.00313852	0.369325	-0.188042	0.278624	-0.864606
chr1	60280000	60320000	0.00352291	0.348975	-0.202569	0.260668	-1.04028
chr1	60320000	60360000	0.00325701	0.37695	-0.362369	0.3008	-0.853559
chr1	60360000	60400000	0.00330767	0.38915	-0.450807	0.339991	-0.808001
chr1	60400000	60440000	0.00318183	0.406625	-0.56374	0.324898	-0.589215
chr1	60440000	60480000	0.00307023	0.40265	-0.801699	0.353621	-0.321247
chr1	60480000	60520000	0.00327634	0.38925	-1.00196	0.318327	-0.145629
chr1	60520000	60560000	0.00350434	0.377575	-1.10742	0.284524	-0.0231391
chr1	60560000	60600000	0.00306414	0.371475	-1.14292	0.238184	0.0269057
chr1	60600000	60640000	0.00332096	0.3805	-1.14919	0.235384	0.0960189
chr1	60640000	60680000	0.00410824	0.358725	-1.19608	0.173792	0.162338
chr1	60680000	60720000	0.00399773	0.378875	-1.19822	0.180572	0.140466
chr1	60720000	60760000	0.00373177	0.383525	-1.19115	0.172345	0.163101
chr1	60760000	60800000	0.00355191	0.35775	-1.26428	0.128743	0.242876
chr1	60800000	60840000	0.00333823	0.383375	-1.268	0.145637	0.250496
chr1	60840000	60880000	0.00382791	0.37495	-1.2684	0.148689	0.295646
chr1	60880000	60920000	0.00368327	0.38305	-1.303	0.173057	0.278922
chr1	60920000	60960000	0.00414235	0.381925	-1.30766	0.140217	0.304779
chr1	60960000	61000000	0.00377241	0.3606	-1.28482	0.12372	0.29675
chr1	61000000	61040000	0.00353678	0.374175	-1.25821	0.153246	0.251029
chr1	61040000	61080000	0.00341011	0.3832	-1.21684	0.18053	0.183237
chr1	61080000	61120000	0.00407427	0.373875	-1.21146	0.180841	0.176975
chr1	61120000	61160000	0.00328709	0.4081	-1.17596	0.241671	0.146411
chr1	61160000	61200000	0.00330903	0.3896	-1.13949	0.236475	0.128288
chr1	61200000	61240000	0.00340977	0.38905	-1.08771	0.271375	0.0670154
chr1	61240000	61280000	0.00386159	0.40925	-1.02523	0.281965	-0.0320057
chr1	61280000	61320000	0.00318746	0.377225	-0.910014	0.278616	-0.126245
chr1	61320000	61360000	0.00329939	0.39435	-0.827109	0.261456	-0.222978
chr1	61360000	61400000	0.00329317	0.4288	-0.766449	0.313244	-0.326516
chr1	61400000	61440000	0.00311766	0.425675	-0.659672	0.274945	-0.36915
chr1	61440000	61480000	0.00308467	0.431375	-0.528709	0.246345	-0.474829
chr1	61480000	61520000	0.00310289	0.430425	-0.287297	0.142611	-0.653075
chr1	61520000	61560000	0.0032251	0.411125	0.0258308	0.0284419	-1.16351
chr1	61560000	61600000	0.00327233	0.36525	-0.145422	0.10119	-0.91553
chr1	61600000	61640000	0.00326285	0.4001	-0.293769	0.145255	-0.738907
chr1	61640000	61680000	0.00340448	0.392675	-0.352626	0.169709	-0.642224
chr1	61680000	61720000	0.00342743	0.358225	-0.364246	0.173498	-0.626009
chr1	61720000	61760000	0.00320822	0.38535	-0.355991	0.150434	-0.634313
chr1	61760000	61800000	0.00300434	0.391975	-0.329874	0.136459	-0.703293
chr1	61800000	61840000	0.00324546	0.398075	-0.374095	0.181234	-0.589226
chr1	61840000	61880000	0.0033206	0.399425	-0.441602	0.208846	-0.563993
chr1	61880000	61920000	0.00307087	0.399825	-0.422116	0.209233	-0.51109
chr1	61920000	61960000	0.00345271	0.42185	-0.481637	0.241991	-0.454662
chr1	61960000	62000000	0.00352515	0.40065	-0.47409	0.253555	-0.550299
chr1	62000000	62040000	0.00345412	0.404	-0.447666	0.241159	-0.589211
chr1	62040000	62080000	0.0035235	0.40525	-0.398922	0.235374	-0.562875
chr1	62080000	62120000	0.00314326	0.415725	-0.276529	0.215553	-0.744806
chr1	62120000	62160000	0.00312266	0.407325	-0.0907722	0.171021	-0.963398
chr1	62160000	62200000	0.00299511	0.40985	0.162478	0.0659727	-1.25527
chr1	62200000	62240000	0.00333194	0.42965	0.128834	0.0527656	-1.2538
chr1	62240000	62280000	0.00346339	0.39265	-0.0774197	0.142281	-0.982011
chr1	62280000	62320000	0.00346158	0.384675	-0.2559	0.173127	-0.753276
chr1	62320000	62360000	0.00330438	0.3999	-0.407304	0.23419	-0.609017
chr1	62360000	62400000	0.00338022	0.39365	-0.496476	0.263833	-0.59484
chr1	62400000	62440000	0.00326969	0.390525	-0.585809	0.296419	-0.572568
chr1	62440000	62480000	0.00340594	0.39605	-0.608497	0.300402	-0.536851
chr1	62480000	62520000	0.00315787	0.40455	-0.603013	0.326818	-0.555356
chr1	62520000	62560000	0.00305719	0.417525	-0.514325	0.306791	-0.590102
chr1	62560000	62600000	0.00326766	0.41345	-0.476485	0.310499	-0.616311
chr1	62600000	62640000	0.00323954	0.453125	-0.402827	0.263968	-0.6098
chr1	62640000	62680000	0.00335604	0.4463	-0.460588	0.307836	-0.500435
chr1	62680000	62720000	0.0033529	0.474125	-0.527707	0.329179	-0.510215
chr1	62720000	62760000	0.00322885	0.466975	-0.428742	0.317649	-0.641104
chr1	62760000	62800000	0.00326552	0.4702	-0.465681	0.327387	-0.603334
chr1	62800000	62840000	0.00324908	0.459675	-0.460786	0.316084	-0.60026
chr1	62840000	62880000	0.00305337	0.431175	-0.283652	0.212938	-0.654595
chr1	62880000	62920000	0.00332264	0.4131	0.0517736	0.0460729	-1.13731
chr1	62920000	62960000	0.00339094	0.370725	-0.11642	0.0581744	-0.981263
chr1	62960000	63000000	0.00343431	0.3573	-0.253329	0.102049	-0.742717
chr1	63000000	63040000	0.00342293	0.358625	-0.346157	0.0822542	-0.655672
chr1	63040000	63080000	0.00363301	0.338925	-0.378008	0.0803616	-0.647032
chr1	63080000	63120000	0.00335017	0.3497	-0.308533	0.075632	-0.703116
chr1	63120000	63160000	0.00345896	0.400875	-0.184065	0.0609295	-0.863668
chr1	63160000	63200000	0.00355893	0.41285	-0.256481	0.102709	-0.762891
chr1	63200000	63240000	0.00356953	0.407525	-0.203241	0.0949024	-0.747433
chr1	63240000	63280000	0.00337409	0.37275	-0.10947	0.065859	-0.961879
chr1	63280000	63320000	0.00336759	0.349875	-0.322653	0.1093	-0.700489
chr1	63320000	63360000	0.00320935	0.367425	-0.560476	0.160575	-0.44763
chr1	63360000	63400000	0.00318045	0.406325	-0.72897	0.256098	-0.297819
chr1	63400000	63440000	0.00320851	0.42145	-0.817034	0.261176	-0.211416
chr1	63440000	63480000	0.0030733	0.417775	-0.875941	0.253415	-0.104587
chr1	63480000	63520000	0.0035096	0.41705	-0.937303	0.245643	-0.0850202
chr1	63520000	63560000	0.00338352	0.41035	-0.928966	0.206559	-0.0462088
chr1	63560000	63600000	0.00337041	0.37785	-0.925904	0.213007	-0.0750739
chr1	63600000	63640000	0.00324512	0.392	-0.906495	0.201933	-0.0869339
chr1	63640000	63680000	0.00314976	0.37835	-0.874299	0.16764	-0.110238
chr1	63680000	63720000	0.00363654	0.3852	-0.814865	0.170362	-0.19669
chr1	63720000	63760000	0.00303352	0.40215	-0.659274	0.151707	-0.314233
chr1	63760000	63800000	0.0029522	0.458575	-0.320424	0.110039	-0.682538
chr1	63800000	63840000	0.00308053	0.423875	-0.0983861	0.0410335	-0.912735
chr1	63840000	63880000	0.00311283	0.37505	-0.0718764	0.0356866	-0.902999
chr1	63880000	63920000	0.00330157	0.36525	-0.1749	0.0520336	-0.766184
chr1	63920000	63960000	0.00341206	0.3764	-0.20254	0.0621523	-0.756026
chr1	63960000	64000000	0.00343284	0.361225	-0.00764259	-0.0069674	-0.907099
chr1	64000000	64040000	0.00329592	0.357525	0.0104261	-0.00800889	-0.821299
chr1	64040000	64080000	0.00302434	0.4106	0.0856081	-0.0249584	-0.790313
chr1	64080000	64120000	0.00305331	0.414625	-0.0764075	0.0445741	-0.567694
chr1	64120000	64160000	0.00328183	0.44965	-0.201364	0.0933004	-0.448824
chr1	64160000	64200000	0.00312756	0.436825	-0.309438	0.136973	-0.38967
chr1	64200000	64240000	0.00349354	0.416	-0.346045	0.160868	-0.359019
chr1	64240000	64280000	0.00308935	0.43425	-0.40855	0.1733	-0.318397
chr1	64280000	64320000	0.00327104	0.405125	-0.473679	0.151344	-0.245733
chr1	64320000	64360000	0.00316131	0.4038	-0.473726	0.170913	-0.251554
chr1	64360000	64400000	0.00329374	0.4176	-0.425733	0.170276	-0.279459
chr1	64400000	64440000	0.0029571	0.41545	-0.420577	0.163399	-0.283744
chr1	64440000	64480000	0.00311728	0.400925	-0.382385	0.15217	-0.338926
chr1	64480000	64520000	0.00321349	0.402325	-0.36567	0.136722	-0.390993
chr1	64520000	64560000	0.00295926	0.404725	-0.328408	0.135479	-0.367343
chr1	64560000	64600000	0.00311315	0.41105	-0.274459	0.095253	-0.371937
chr1	64600000	64640000	0.00312075	0.405875	-0.151784	0.0486263	-0.434977
chr1	64640000	64680000	0.00361793	0.4148	-0.0965004	0.0437352	-0.597821
chr1	64680000	64720000	0.00320154	0.37815	-0.0148756	-0.023115	-0.473643
chr1	64720000	64760000	0.00360954	0.401025	-0.00891935	-0.0390931	-0.39346
chr1	64760000	64800000	0.00320437	0.4261	-0.0962886	0.0178756	-0.422181
chr1	64800000	64840000	0.00375063	0.433675	-0.0874833	0.0532557	-0.501733
chr1	64840000	64880000	0.00342556	0.386325	-0.0389337	0.0224742	-0.49826
chr1	64880000	64920000	0.00345512	0.416	0.053515	-0.0222085	-0.564187
chr1	64920000	64960000	0.00357677	0.422875	0.286195	-0.134196	-0.730654
chr1	64960000	65000000	0.0033144	0.39855	0.375867	-0.17846	-0.808938
chr1	65000000	65040000	0.00310335	0.387075	0.327452	-0.156855	-0.764454
chr1	65040000	65080000	0.00349378	0.392025	0.174187	-0.102551	-0.665712
chr1	65080000	65120000	0.00302604	0.406425	0.142861	-0.0600322	-0.595608
chr1	65120000	65160000	0.00315781	0.402225	0.132653	-0.0848413	-0.481705
chr1	65160000	65200000	0.00314886	0.414325	0.118851	-0.0529661	-0.530966
chr1	65200000	65240000	0.00335498	0.3854	0.165674	-0.0836535	-0.662335
chr1	65240000	65280000	0.00326851	0.3605	0.159767	-0.0836016	-0.600457
chr1	65280000	65320000	0.00307164	0.4318	0.363367	-0.209596	-0.64655
chr1	65320000	65360000	0.00343164	0.4342	0.535574	-0.289218	-0.805652
chr1	65360000	65400000	0.0035339	0.40925	0.672604	-0.312105	-0.962409
chr1	65400000	65440000	0.00347734	0.4146	0.667246	-0.340391	-0.917507
chr1	65440000	65480000	0.00309032	0.4252	0.613901	-0.29226	-0.888173
chr1	65480000	65520000	0.00306604	0.42595	0.487401	-0.249543	-0.77757
chr1	65520000	65560000	0.00325901	0.4249	0.301968	-0.193905	-0.676998
chr1	65560000	65600000	0.00363162	0.433725	0.0447341	-0.0188234	-0.595807
chr1	65600000	65640000	0.00319109	0.445275	-0.0187181	0.000743742	-0.631677
chr1	65640000	65680000	0.00298693	0.426125	-0.0861481	-0.0198145	-0.505484
chr1	65680000	65720000	0.00333451	0.3999	-0.039746	-0.0569693	-0.535566
chr1	65720000	65760000	0.00304786	0.408975	-0.104576	-0.0205266	-0.565511
chr1	65760000	65800000	0.00320262	0.401575	-0.308697	0.0209088	-0.401332
chr1	65800000	65840000	0.00329399	0.3955	-0.319045	0.0160881	-0.40245
chr1	65840000	65880000	0.00316458	0.39295	-0.122863	-0.0224586	-0.58392
chr1	65880000	65920000	0.00340894	0.399625	-0.061337	-0.0496665	-0.64277
chr1	65920000	65960000	0.00357956	0.3874	-0.390927	0.0085513	-0.332664
chr1	65960000	66000000	0.00321444	0.387	-0.485014	0.0216328	-0.235041
chr1	66000000	66040000	NA	0.38685	NA	NA	NA
chr1	66040000	66080000	0.0033731	0.3543	-0.523534	-0.0125941	-0.177212
chr1	66080000	66120000	0.00359397	0.37285	-0.496601	-0.0118431	-0.225726
chr1	66120000	66160000	0.00352122	0.3758	-0.390625	-0.0437634	-0.20123
chr1	66160000	66200000	0.00325028	0.3999	-0.416908	-0.0396078	-0.178637
chr1	66200000	66240000	0.00322534	0.37255	-0.508814	-0.0455362	-0.152978
chr1	66240000	66280000	0.00342103	0.3699	-0.448587	-0.116794	-0.213033
chr1	66280000	66320000	0.00350598	0.357325	-0.479005	-0.097859	-0.216627
chr1	66320000	66360000	0.00412737	0.366825	-0.493306	-0.0943175	-0.184301
chr1	66360000	66400000	0.00341581	0.366775	-0.327881	-0.11278	-0.267483
chr1	66400000	66440000	0.00330264	0.37235	-0.0857345	-0.189668	-0.352444
chr1	66440000	66480000	0.0035745	0.3604	-0.178743	-0.175133	-0.368541
chr1	66480000	66520000	0.00363148	0.36365	-0.27091	-0.132182	-0.325029
chr1	66520000	66560000	0.00358317	0.364725	-0.223094	-0.135983	-0.360066
chr1	66560000	66600000	0.00370697	0.36445	-0.10183	-0.152836	-0.489454
chr1	66600000	66640000	0.00324093	0.375975	-0.0494937	-0.164229	-0.518235
chr1	66640000	66680000	0.00450175	0.38365	0.00330824	-0.181502	-0.584356
chr1	66680000	66720000	0.00304201	0.3866	0.14787	-0.236355	-0.492873
chr1	66720000	66760000	0.00317559	0.39815	0.504443	-0.382663	-0.830352
chr1	66760000	66800000	0.00350919	0.3909	0.621829	-0.371257	-0.971985
chr1	66800000	66840000	0.00346871	0.38075	0.599115	-0.386718	-0.894157
chr1	66840000	66880000	0.0033961	0.4055	0.506021	-0.337279	-0.906964
chr1	66880000	66920000	0.00365797	0.40245	0.362475	-0.307257	-0.720781
chr1	66920000	66960000	0.00376314	0.383675	-0.00213492	-0.146035	-0.457325
chr1	66960000	67000000	0.00307408	0.383375	-0.123546	-0.0847085	-0.476781
chr1	67000000	67040000	0.00346865	0.383625	-0.222372	-0.0441393	-0.456296
chr1	67040000	67080000	0.00314628	0.375925	-0.267089	-0.0551528	-0.464819
chr1	67080000	67120000	0.00324295	0.3845	-0.240335	-0.0434422	-0.500185
chr1	67120000	67160000	0.00348761	0.3854	-0.18372	-0.0448566	-0.585556
chr1	67160000	67200000	0.00346748	0.36685	-0.0080101	-0.116378	-0.659329
chr1	67200000	67240000	0.00309815	0.366225	0.251432	-0.259787	-0.685237
chr1	67240000	67280000	0.00382016	0.3691	0.383544	-0.274812	-0.775367
chr1	67280000	67320000	0.00388119	0.34935	0.314793	-0.259094	-0.830807
chr1	67320000	67360000	0.00342502	0.370675	0.314517	-0.234597	-0.826323
chr1	67360000	67400000	0.00346818	0.382375	0.436897	-0.285988	-0.864755
chr1	67400000	67440000	0.0035318	0.3571	0.50862	-0.318743	-0.918834
chr1	67440000	67480000	0.00315454	0.382275	0.42834	-0.301228	-0.756483
chr1	67480000	67520000	0.00331678	0.373375	0.415529	-0.266278	-0.881636
chr1	67520000	67560000	0.00392024	0.3966	0.348801	-0.230255	-0.881054
chr1	67560000	67600000	0.00345113	0.38125	0.349653	-0.238759	-0.811953
chr1	67600000	67640000	0.00315516	0.39495	0.452601	-0.312872	-0.760188
chr1	67640000	67680000	0.00365208	0.4079	0.481664	-0.310512	-0.812817
chr1	67680000	67720000	0.00375427	0.396025	0.434399	-0.332261	-0.702507
chr1	67720000	67760000	0.00332085	0.40715	0.600399	-0.382382	-0.852906
chr1	67760000	67800000	0.00381413	0.39315	0.645208	-0.363245	-0.962131
chr1	67800000	67840000	0.00353379	0.410525	0.54499	-0.324088	-0.866469
chr1	67840000	67880000	0.00345004	0.4241	0.544916	-0.308512	-0.938623
chr1	67880000	67920000	0.00344041	0.41075	0.652424	-0.350855	-0.998541
chr1	67920000	67960000	0.00316843	0.436025	0.451826	-0.273995	-0.874639
chr1	67960000	68000000	0.00311026	0.434875	0.217307	-0.203515	-0.759432
chr1	68000000	68040000	0.00330893	0.4506	0.00733095	-0.0999494	-0.748623
chr1	68040000	68080000	0.003282	0.434775	-0.0702401	-0.0673266	-0.837095
chr1	68080000	68120000	0.00290102	0.41995	0.00330984	-0.081071	-0.987469
chr1	68120000	68160000	0.00311433	0.403325	0.195069	-0.172043	-1.13219
chr1	68160000	68200000	0.00342983	0.4239	0.18304	-0.175781	-1.09252
chr1	68200000	68240000	0.00286814	0.423975	-0.0115451	-0.0970471	-0.801966
chr1	68240000	68280000	0.00331355	0.395825	-0.369267	0.00993588	-0.676258
chr1	68280000	68320000	0.00297841	0.4202	-0.561506	0.0904298	-0.608777
chr1	68320000	68360000	0.00313674	0.403225	-0.719836	0.0711591	-0.36312
chr1	68360000	68400000	0.00349546	0.38195	-0.86965	0.0522587	-0.243648
chr1	68400000	68440000	0.0032441	0.40795	-0.953507	0.0376875	-0.123544
chr1	68440000	68480000	0.00337577	0.39585	-1.00384	0.00290373	-0.0409065
chr1	68480000	68520000	0.00359024	0.395975	-1.0165	0.0180035	-0.0155756
chr1	68520000	68560000	0.00341252	0.38605	-1.00561	0.0330762	-0.0329031
chr1	68560000	68600000	0.0030408	0.419375	-0.912078	0.0474565	-0.0872077
chr1	68600000	68640000	0.00324292	0.4274	-0.977626	0.0550813	-0.0354406
chr1	68640000	68680000	0.0033059	0.39485	-1.02464	0.035685	0.00236663
chr1	68680000	68720000	0.00326762	0.404525	-1.08474	0.0160556	0.0735247
chr1	68720000	68760000	0.00346599	0.401675	-1.09068	0.0445706	0.0311749
chr1	68760000	68800000	0.00304728	0.424	-1.08381	0.0465582	0.0348531
chr1	68800000	68840000	0.003296	0.3986	-1.0537	0.0481684	0.0265604
chr1	68840000	68880000	0.00399055	0.396225	-1.08857	-0.0104744	0.0796176
chr1	68880000	68920000	0.00321478	0.3794	-1.0885	-0.0466329	0.10795
chr1	68920000	68960000	0.00320587	0.356	-1.03884	-0.0368422	-0.0241757
chr1	68960000	69000000	0.00366608	0.36645	-1.0828	-0.0573089	0.0405238
chr1	69000000	69040000	0.00373584	0.36145	-1.17317	-0.118156	0.243117
chr1	69040000	69080000	0.00336546	0.3602	-1.2273	-0.140762	0.326868
chr1	69080000	69120000	0.00361299	0.366825	-1.21799	-0.16112	0.343164
chr1	69120000	69160000	0.00392116	0.35365	-1.22862	-0.145694	0.361631
chr1	69160000	69200000	0.00341838	0.3805	-1.2252	-0.141137	0.344569
chr1	69200000	69240000	0.00394564	0.379725	-1.22212	-0.156133	0.349923
chr1	69240000	69280000	0.00364012	0.379275	-1.21956	-0.126312	0.349928
chr1	69280000	69320000	0.0035955	0.3697	-1.22773	-0.141423	0.334408
chr1	69320000	69360000	0.00389199	0.402475	-1.24469	-0.133325	0.363861
chr1	69360000	69400000	0.00408457	0.376775	-1.24247	-0.120509	0.345679
chr1	69400000	69440000	0.00335648	0.388425	-1.23769	-0.106239	0.34032
chr1	69440000	69480000	0.00359437	0.380875	-1.22768	-0.136742	0.348558
chr1	69480000	69520000	0.00378925	0.3528	-1.22042	-0.175446	0.367833
chr1	69520000	69560000	0.00363234	0.38495	-1.1996	-0.158013	0.345045
chr1	69560000	69600000	0.00437857	0.3861	-1.23671	-0.147529	0.362298
chr1	69600000	69640000	0.00358199	0.360125	-1.21995	-0.199075	0.374123
chr1	69640000	69680000	0.00334026	0.352925	-1.18634	-0.186884	0.338459
chr1	69680000	69720000	0.00360092	0.374	-1.16125	-0.160125	0.264247
chr1	69720000	69760000	0.00320586	0.367525	-1.14481	-0.172261	0.261261
chr1	69760000	69800000	0.00331481	0.371	-1.16907	-0.184233	0.276541
chr1	69800000	69840000	0.00401204	0.366675	-1.16689	-0.188245	0.265615
chr1	69840000	69880000	0.00354146	0.385675	-1.15342	-0.177207	0.250789
chr1	69880000	69920000	0.00399449	0.362125	-1.1793	-0.18066	0.281026
chr1	69920000	69960000	0.00372348	0.358075	-1.14349	-0.222057	0.271757
chr1	69960000	70000000	0.00351748	0.36005	-1.15938	-0.220688	0.228732
chr1	70000000	70040000	0.00387966	0.370475	-1.10951	-0.206274	0.202074
chr1	70040000	70080000	0.00378396	0.3433	-1.10801	-0.246408	0.221355
chr1	70080000	70120000	0.00374781	0.333875	-1.14768	-0.271286	0.27471
chr1	70120000	70160000	0.00349718	0.35265	-1.14137	-0.258781	0.246986
chr1	70160000	70200000	0.00358367	0.360425	-1.13449	-0.226854	0.253055
chr1	70200000	70240000	0.00341748	0.348025	-1.15797	-0.258758	0.282037
chr1	70240000	70280000	0.00379716	0.356	-1.23962	-0.274114	0.330201
chr1	70280000	70320000	0.00366798	0.334975	-1.24451	-0.299308	0.356499
chr1	70320000	70360000	0.00423591	0.36195	-1.24538	-0.318738	0.344234
chr1	70360000	70400000	NA	0.3835	NA	NA	NA
chr1	70400000	70440000	0.00351418	0.3541	-1.24263	-0.280227	0.256221
chr1	70440000	70480000	0.00361808	0.359975	-1.21972	-0.274542	0.221192
chr1	70480000	70520000	0.00322897	0.34085	-1.16487	-0.279988	0.107407
chr1	70520000	70560000	0.00331643	0.3556	-1.05691	-0.246845	-0.0646947
chr1	70560000	70600000	0.00348414	0.35905	-0.819618	-0.176618	-0.375415
chr1	70600000	70640000	0.00316011	0.3533	-0.476485	-0.145641	-0.947569
chr1	70640000	70680000	0.00325509	0.360625	-0.0558274	-0.216727	-1.55537
chr1	70680000	70720000	0.00358873	0.367875	0.144547	-0.253849	-1.7149
chr1	70720000	70760000	0.00327686	0.377475	0.0465889	-0.200556	-1.61263
chr1	70760000	70800000	0.0034991	0.36865	0.0175396	-0.183217	-1.52174
chr1	70800000	70840000	0.00310345	0.41675	-0.0250783	-0.180726	-1.53978
chr1	70840000	70880000	0.00337879	0.4047	-0.272046	-0.121428	-1.28561
chr1	70880000	70920000	0.00325304	0.3897	-0.461266	-0.117676	-0.993501
chr1	70920000	70960000	0.00336698	0.3992	-0.67208	-0.108514	-0.632542
chr1	70960000	71000000	0.00338021	0.381675	-0.77424	-0.122669	-0.429127
chr1	71000000	71040000	0.00347158	0.368425	-0.977704	-0.170812	-0.141873
chr1	71040000	71080000	NA	0.390575	NA	NA	NA
chr1	71080000	71120000	0.00346496	0.36835	-1.14536	-0.242563	0.153956
chr1	71120000	71160000	0.00353391	0.37355	-1.12319	-0.242433	0.105324
chr1	71160000	71200000	0.00329436	0.3727	-1.16705	-0.263453	0.19739
chr1	71200000	71240000	0.00354895	0.380925	-1.19816	-0.255282	0.234616
chr1	71240000	71280000	0.00354215	0.38765	-1.20344	-0.250894	0.224098
chr1	71280000	71320000	0.0036884	0.37235	-1.21039	-0.258091	0.201713
chr1	71320000	71360000	0.00322084	0.388325	-1.13537	-0.217126	0.0903532
chr1	71360000	71400000	0.00348293	0.37535	-1.09834	-0.197729	0.0570195
chr1	71400000	71440000	0.00340275	0.372875	-1.05552	-0.19297	-0.0755954
chr1	71440000	71480000	0.00310871	0.377075	-0.94108	-0.158619	-0.247301
chr1	71480000	71520000	0.00322305	0.396175	-0.720266	-0.123903	-0.65132
chr1	71520000	71560000	0.00311791	0.365925	-0.45384	-0.182102	-1.1391
chr1	71560000	71600000	0.00352319	0.36295	-0.878765	-0.205801	-0.314317
chr1	71600000	71640000	0.00361596	0.3824	-1.07665	-0.254135	0.048283
chr1	71640000	71680000	0.00325862	0.3826	-1.09235	-0.249234	0.124886
chr1	71680000	71720000	0.00379731	0.366575	-1.14377	-0.283626	0.201554
chr1	71720000	71760000	0.00372519	0.35825	-1.17672	-0.332417	0.287981
chr1	71760000	71800000	0.0033899	0.35945	-1.18354	-0.338435	0.331578
chr1	71800000	71840000	0.00344869	0.362975	-1.14577	-0.344368	0.332633
chr1	71840000	71880000	0.00336825	0.36835	-1.11647	-0.293623	0.270154
chr1	71880000	71920000	0.00374563	0.356475	-1.09565	-0.298896	0.211289
chr1	71920000	71960000	0.00345185	0.3534	-1.04543	-0.286287	0.171154
chr1	71960000	72000000	0.00412227	0.37065	-1.02596	-0.281175	0.149152
chr1	72000000	72040000	0.00338022	0.357125	-1.01393	-0.287172	0.129981
chr1	72040000	72080000	0.00348161	0.3654	-1.01039	-0.300685	0.127499
chr1	72080000	72120000	0.00363089	0.352975	-1.02387	-0.312511	0.149089
chr1	72120000	72160000	0.00345174	0.34455	-1.00413	-0.342144	0.184667
chr1	72160000	72200000	0.00336526	0.361875	-0.986582	-0.317738	0.157468
chr1	72200000	72240000	0.00317759	0.36205	-0.963372	-0.305558	0.0978745
chr1	72240000	72280000	0.00330112	0.353025	-0.94446	-0.303782	0.0267931
chr1	72280000	72320000	0.00322369	0.36395	-0.930626	-0.299352	0.0343877
chr1	72320000	72360000	0.00421903	0.35985	-0.903103	-0.306188	0.0204369
chr1	72360000	72400000	0.00337756	0.344425	-0.906831	-0.325335	0.0863581
chr1	72400000	72440000	0.00337999	0.34305	-0.889781	-0.330169	0.0796837
chr1	72440000	72480000	0.00354511	0.3415	-0.878828	-0.355368	0.0579997
chr1	72480000	72520000	0.00352044	0.337375	-0.850434	-0.349416	0.0617648
chr1	72520000	72560000	0.00339582	0.3434	-0.836725	-0.343923	0.0610745
chr1	72560000	72600000	0.00329824	0.327475	-0.847849	-0.371111	0.0657822
chr1	72600000	72640000	0.00359416	0.343125	-0.801553	-0.32575	0.00705698
chr1	72640000	72680000	0.00335451	0.32855	-0.768914	-0.338273	-0.0438822
chr1	72680000	72720000	0.00363161	0.3364	-0.712864	-0.334091	-0.224654
chr1	72720000	72760000	0.00355067	0.34605	-0.55095	-0.296061	-0.566791
chr1	72760000	72800000	NA	0.35685	NA	NA	NA
chr1	72800000	72840000	0.00433164	0.3474	-0.644481	-0.309714	-0.345285
chr1	72840000	72880000	0.00382641	0.3514	-0.759326	-0.31019	-0.177788
chr1	72880000	72920000	0.0038181	0.362	-0.801843	-0.332913	-0.00675488
chr1	72920000	72960000	0.00331287	0.35005	-0.82692	-0.337526	0.00314294
chr1	72960000	73000000	0.00359785	0.3467	-0.841658	-0.323452	0.0111711
chr1	73000000	73040000	0.00345094	0.365925	-0.846955	-0.335892	0.0191899
chr1	73040000	73080000	0.00341462	0.32625	-0.87531	-0.337715	0.114534
chr1	73080000	73120000	0.0034741	0.3502	-0.882527	-0.351271	0.15748
chr1	73120000	73160000	0.00373436	0.362925	-0.948456	-0.339925	0.222018
chr1	73160000	73200000	0.00359413	0.346075	-0.979275	-0.358018	0.306469
chr1	73200000	73240000	0.00346873	0.34855	-1.04811	-0.384808	0.360188
chr1	73240000	73280000	0.00385275	0.34925	-1.02267	-0.363201	0.35069
chr1	73280000	73320000	0.00405233	0.362	-1.04936	-0.359666	0.335219
chr1	73320000	73360000	0.00338773	0.3446	-1.03797	-0.344059	0.34433
chr1	73360000	73400000	NA	0.3508	NA	NA	NA
chr1	73400000	73440000	0.00378147	0.3362	-1.00777	-0.370937	0.369661
chr1	73440000	73480000	0.00409545	0.36845	-1.06784	-0.355499	0.356186
chr1	73480000	73520000	0.00351509	0.346925	-1.07124	-0.381873	0.378183
chr1	73520000	73560000	0.00385765	0.351325	-1.04442	-0.352982	0.36936
chr1	73560000	73600000	0.00366681	0.358025	-1.039	-0.351084	0.327693
chr1	73600000	73640000	0.00353101	0.3593	-1.04423	-0.325713	0.343005
chr1	73640000	73680000	0.00350787	0.374025	-1.06111	-0.343193	0.350671
chr1	73680000	73720000	0.00408516	0.344825	-1.06031	-0.353467	0.396946
chr1	73720000	73760000	0.00373206	0.3303	-1.0742	-0.409596	0.439336
chr1	73760000	73800000	0.00398088	0.3409	-1.0635	-0.401446	0.418657
chr1	73800000	73840000	0.00339825	0.33915	-1.0747	-0.370415	0.386078
chr1	73840000	73880000	0.00336854	0.353925	-1.04503	-0.362842	0.373122
chr1	73880000	73920000	0.00372185	0.34825	-1.06549	-0.380759	0.389344
chr1	73920000	73960000	0.0039064	0.354075	-1.03104	-0.375291	0.387199
chr1	73960000	74000000	0.00384011	0.331325	-1.07049	-0.364584	0.385745
chr1	74000000	74040000	0.00347491	0.35	-1.0603	-0.375449	0.376911
chr1	74040000	74080000	0.003389	0.361	-1.04281	-0.334704	0.324355
chr1	74080000	74120000	0.00325039	0.363875	-1.03852	-0.330017	0.303517
chr1	74120000	74160000	0.00372549	0.3531	-1.03283	-0.350232	0.304677
chr1	74160000	74200000	0.00334935	0.360425	-1.03831	-0.344636	0.337064
chr1	74200000	74240000	0.00331392	0.342425	-1.03423	-0.362484	0.354707
chr1	74240000	74280000	0.00373691	0.363925	-1.03178	-0.336248	0.296214
chr1	74280000	74320000	0.0032771	0.34835	-0.997839	-0.349617	0.287908
chr1	74320000	74360000	0.00330003	0.369675	-1.02053	-0.346762	0.292993
chr1	74360000	74400000	0.00329272	0.34905	-1.00398	-0.357446	0.31231
chr1	74400000	74440000	0.0032933	0.356725	-0.987776	-0.346111	0.275012
chr1	74440000	74480000	0.00353617	0.361125	-0.934088	-0.323197	0.171359
chr1	74480000	74520000	0.00359263	0.367425	-0.948546	-0.345173	0.222933
chr1	74520000	74560000	0.0034715	0.33115	-0.966253	-0.363645	0.226523
chr1	74560000	74600000	0.00414829	0.348325	-0.960694	-0.374349	0.177129
chr1	74600000	74640000	0.00348019	0.327525	-0.897351	-0.344089	-0.0196635
chr1	74640000	74680000	0.0036119	0.34195	-0.693954	-0.277198	-0.52336
chr1	74680000	74720000	0.00384751	0.356	-0.795286	-0.271783	-0.255305
chr1	74720000	74760000	0.00354923	0.344325	-0.855328	-0.280267	-0.125477
chr1	74760000	74800000	0.00327883	0.356225	-0.883684	-0.270764	-0.071504
chr1	74800000	74840000	0.00383602	0.366125	-0.906388	-0.23714	-0.0484487
chr1	74840000	74880000	0.00333085	0.3733	-0.93497	-0.270419	0.0754425
chr1	74880000	74920000	0.00398909	0.36475	-0.969891	-0.288187	0.147459
chr1	74920000	74960000	0.0034203	0.37605	-0.939757	-0.25109	0.102541
chr1	74960000	75000000	0.00344322	0.387725	-0.916219	-0.257398	0.0617795
chr1	75000000	75040000	0.0033713	0.390075	-0.952321	-0.268419	0.111033
chr1	75040000	75080000	0.00336807	0.3525	-0.957333	-0.294202	0.0925283
chr1	75080000	75120000	0.00316356	0.364225	-0.925864	-0.302556	0.0372581
chr1	75120000	75160000	0.00318876	0.37765	-0.830778	-0.270842	-0.149911
chr1	75160000	75200000	0.00331576	0.3892	-0.609999	-0.19115	-0.701167
chr1	75200000	75240000	0.00324385	0.387975	-0.510146	-0.22887	-0.935637
chr1	75240000	75280000	0.00341512	0.357975	-0.823258	-0.270036	-0.234684
chr1	75280000	75320000	0.00326526	0.3461	-1.00899	-0.322877	0.133239
chr1	75320000	75360000	0.00435504	0.38845	-1.12121	-0.315298	0.250509
chr1	75360000	75400000	0.00434423	0.36565	-1.15143	-0.338023	0.327943
chr1	75400000	75440000	0.00331897	0.37705	-1.13516	-0.335235	0.303724
chr1	75440000	75480000	0.00397526	0.377725	-1.16139	-0.34233	0.356191
chr1	75480000	75520000	0.00373647	0.368925	-1.17708	-0.348669	0.366573
chr1	75520000	75560000	0.00332493	0.35655	-1.15517	-0.352213	0.351102
chr1	75560000	75600000	0.00388427	0.385	-1.13457	-0.317718	0.245941
chr1	75600000	75640000	0.00326153	0.385925	-1.06574	-0.300038	0.165534
chr1	75640000	75680000	0.00333252	0.38135	-1.01562	-0.281458	0.0697362
chr1	75680000	75720000	0.00316571	0.358675	-0.954579	-0.263515	-0.00183914
chr1	75720000	75760000	0.00356145	0.3699	-0.954859	-0.296332	0.0212912
chr1	75760000	75800000	0.00318281	0.36455	-0.966239	-0.314439	0.0351258
chr1	75800000	75840000	0.00334423	0.36665	-0.976168	-0.28781	0.0491635
chr1	75840000	75880000	NA	0.3954	NA	NA	NA
chr1	75880000	75920000	0.00339885	0.3769	-1.0162	-0.30075	0.154724
chr1	75920000	75960000	0.00364505	0.374375	-1.03084	-0.313872	0.12909
chr1	75960000	76000000	0.00368691	0.364675	-1.01635	-0.312086	0.103056
chr1	76000000	76040000	0.00353743	0.35745	-0.95526	-0.28926	-0.00676234
chr1	76040000	76080000	0.00352218	0.371575	-0.860416	-0.230805	-0.160299
chr1	76080000	76120000	0.00355774	0.39335	-0.723888	-0.220145	-0.353241
chr1	76120000	76160000	0.00399305	0.392925	-0.646549	-0.199911	-0.498897
chr1	76160000	76200000	0.00362365	0.3891	-0.288783	-0.233343	-1.04489
chr1	76200000	76240000	0.00350324	0.400825	-0.147868	-0.211892	-1.2398
chr1	76240000	76280000	0.00337904	0.3979	0.00880926	-0.290872	-1.32845
chr1	76280000	76320000	0.00422008	0.3889	-0.372451	-0.215363	-0.72322
chr1	76320000	76360000	0.00346325	0.355075	-0.57111	-0.228757	-0.439738
chr1	76360000	76400000	0.00344856	0.348675	-0.630503	-0.249639	-0.301264
chr1	76400000	76440000	0.00352225	0.3744	-0.538947	-0.230509	-0.378228
chr1	76440000	76480000	0.00320212	0.396825	-0.399752	-0.242005	-0.449487
chr1	76480000	76520000	0.00344081	0.382525	-0.333973	-0.237511	-0.574317
chr1	76520000	76560000	0.00329142	0.39815	-0.206684	-0.236464	-0.710281
chr1	76560000	76600000	0.00328329	0.42645	-0.213184	-0.239904	-0.549518
chr1	76600000	76640000	0.00332826	0.411475	-0.0309003	-0.291583	-0.525817
chr1	76640000	76680000	0.00311077	0.397875	0.0591593	-0.311638	-0.748515
chr1	76680000	76720000	0.00337987	0.39235	0.173966	-0.316299	-0.88583
chr1	76720000	76760000	0.00318739	0.392725	0.249459	-0.348027	-0.964303
chr1	76760000	76800000	0.00353178	0.37775	0.114531	-0.303379	-0.707509
chr1	76800000	76840000	0.00336182	0.388175	-0.0460583	-0.277551	-0.552808
chr1	76840000	76880000	0.00347805	0.3622	-0.130629	-0.249902	-0.521164
chr1	76880000	76920000	0.00337262	0.3749	-0.141109	-0.272875	-0.502199
chr1	76920000	76960000	0.00354179	0.3839	-0.126871	-0.271069	-0.57441
chr1	76960000	77000000	0.00327645	0.371575	-0.152475	-0.251989	-0.531403
chr1	77000000	77040000	0.00334634	0.3749	-0.237416	-0.262559	-0.408551
chr1	77040000	77080000	0.00304448	0.38245	-0.275589	-0.243516	-0.405792
chr1	77080000	77120000	0.00310689	0.37375	-0.307167	-0.24355	-0.3376
chr1	77120000	77160000	0.00320462	0.392275	-0.33939	-0.243721	-0.348692
chr1	77160000	77200000	0.00356229	0.3769	-0.306458	-0.226425	-0.356788
chr1	77200000	77240000	0.00336641	0.388925	-0.36988	-0.223545	-0.287933
chr1	77240000	77280000	0.0030939	0.388125	-0.354131	-0.216365	-0.292666
chr1	77280000	77320000	0.00334477	0.3699	-0.334187	-0.201992	-0.381797
chr1	77320000	77360000	0.00306123	0.402675	-0.321686	-0.196849	-0.364585
chr1	77360000	77400000	0.00366444	0.385525	-0.354897	-0.213432	-0.347206
chr1	77400000	77440000	0.00359188	0.388375	-0.423234	-0.210216	-0.277935
chr1	77440000	77480000	0.00410997	0.39195	-0.460001	-0.21845	-0.278103
chr1	77480000	77520000	0.00316177	0.42855	-0.388456	-0.205341	-0.383207
chr1	77520000	77560000	0.00316323	0.3832	-0.279635	-0.239072	-0.436413
chr1	77560000	77600000	0.00357476	0.35185	-0.113796	-0.280867	-0.530002
chr1	77600000	77640000	0.00326179	0.3541	0.14282	-0.327082	-0.614857
chr1	77640000	77680000	0.00366748	0.3712	0.24775	-0.346995	-0.838828
chr1	77680000	77720000	0.00337679	0.36685	0.306071	-0.335944	-0.906645
chr1	77720000	77760000	0.00315758	0.39705	0.337733	-0.366917	-0.918611
chr1	77760000	77800000	0.00332932	0.370675	0.37806	-0.372907	-0.907476
chr1	77800000	77840000	0.00333303	0.37155	0.337244	-0.365084	-0.903214
chr1	77840000	77880000	0.00338543	0.3905	0.325343	-0.354179	-0.859312
chr1	77880000	77920000	0.00336537	0.377125	0.332795	-0.352158	-0.904933
chr1	77920000	77960000	0.00310454	0.409675	0.186674	-0.320597	-0.796561
chr1	77960000	78000000	0.00318423	0.4356	0.162273	-0.325784	-0.733715
chr1	78000000	78040000	0.003078	0.409275	0.223801	-0.340152	-0.801065
chr1	78040000	78080000	0.00328885	0.361175	0.309469	-0.345932	-1.01128
chr1	78080000	78120000	0.00324	0.3724	0.369243	-0.344638	-1.02342
chr1	78120000	78160000	0.00312266	0.405625	0.471969	-0.386219	-1.07242
chr1	78160000	78200000	0.00305414	0.3833	0.42862	-0.354921	-1.04168
chr1	78200000	78240000	0.00319939	0.40465	0.456016	-0.377446	-1.13713
chr1	78240000	78280000	0.00333143	0.404125	0.386391	-0.345221	-1.07042
chr1	78280000	78320000	0.00346242	0.3859	0.267372	-0.309249	-0.985331
chr1	78320000	78360000	0.00362547	0.4152	0.243763	-0.320028	-1.00819
chr1	78360000	78400000	0.00366514	0.38695	0.313638	-0.354232	-1.00107
chr1	78400000	78440000	0.00333721	0.363	0.485837	-0.411377	-1.18933
chr1	78440000	78480000	0.00341652	0.37755	0.406994	-0.410649	-1.18541
chr1	78480000	78520000	0.00340932	0.3888	0.279802	-0.362818	-1.15222
chr1	78520000	78560000	0.00327731	0.388725	0.109616	-0.323924	-1.02258
chr1	78560000	78600000	0.00307308	0.4029	-0.0246631	-0.305416	-0.816039
chr1	78600000	78640000	0.00346128	0.386125	-0.38215	-0.280323	-0.538899
chr1	78640000	78680000	0.00377681	0.394025	-0.686048	-0.265702	-0.22222
chr1	78680000	78720000	0.00371367	0.398475	-0.785419	-0.279218	-0.0872759
chr1	78720000	78760000	0.00349925	0.38685	-0.82399	-0.309381	0.0215763
chr1	78760000	78800000	0.00387578	0.3749	-0.834842	-0.324968	0.0532409
chr1	78800000	78840000	0.00351665	0.3735	-0.890236	-0.317816	0.0434478
chr1	78840000	78880000	0.00371489	0.3783	-0.874892	-0.336534	0.0924659
chr1	78880000	78920000	0.00345057	0.35565	-0.875809	-0.359806	0.128844
chr1	78920000	78960000	0.00333938	0.3974	-0.882998	-0.334759	0.105498
chr1	78960000	79000000	0.00344632	0.3659	-0.816992	-0.334441	0.0174399
chr1	79000000	79040000	0.00368574	0.36845	-0.735194	-0.32817	-0.0658122
chr1	79040000	79080000	0.00390046	0.35515	-0.518365	-0.305987	-0.391126
chr1	79080000	79120000	0.00338049	0.356325	-0.195627	-0.32615	-1.02498
chr1	79120000	79160000	0.00321662	0.373975	-0.35092	-0.301496	-0.700261
chr1	79160000	79200000	0.00304476	0.3702	-0.679819	-0.335178	-0.181554
chr1	79200000	79240000	0.00326914	0.366575	-0.797529	-0.372507	0.04039
chr1	79240000	79280000	0.00326642	0.3438	-0.81998	-0.391695	0.0919117
chr1	79280000	79320000	0.00361715	0.372225	-0.777524	-0.377306	0.0184632
chr1	79320000	79360000	0.00358336	0.383475	-0.814884	-0.368178	0.133427
chr1	79360000	79400000	0.00348875	0.3398	-0.877323	-0.42883	0.253842
chr1	79400000	79440000	0.00365486	0.35035	-0.881184	-0.440819	0.291904
chr1	79440000	79480000	0.00393504	0.339675	-0.895355	-0.4457	0.263159
chr1	79480000	79520000	0.0035961	0.357525	-0.838057	-0.418959	0.147339
chr1	79520000	79560000	0.00351868	0.341825	-0.867099	-0.433124	0.192551
chr1	79560000	79600000	0.00356786	0.3634	-0.908571	-0.413207	0.258747
chr1	79600000	79640000	0.00387428	0.35835	-0.916571	-0.400124	0.277516
chr1	79640000	79680000	0.00359862	0.343925	-0.908433	-0.390495	0.261137
chr1	79680000	79720000	0.00326254	0.361575	-0.926827	-0.399672	0.281303
chr1	79720000	79760000	0.00320836	0.375575	-0.925237	-0.387768	0.282902
chr1	79760000	79800000	0.00384725	0.3307	-0.934268	-0.396315	0.309601
chr1	79800000	79840000	0.00356501	0.367725	-0.916684	-0.378473	0.259716
chr1	79840000	79880000	0.00353622	0.347975	-0.931572	-0.399853	0.318689
chr1	79880000	79920000	0.0036568	0.35525	-0.965508	-0.399476	0.31949
chr1	79920000	79960000	0.00388487	0.3825	-0.950798	-0.359029	0.289907
[truncated: 230,213+ more rows]
