# Supplementary material for: Dynamic chromatin architecture identifies new autoimmune-associated enhancers for IL2 and novel genes regulating CD4+ T cell activation
Source: eLife. 2024 Sep 20;13:RP96852. doi: 10.7554/eLife.96852 (PMC11418197; doi:10.7554/eLife.96852)
Supplement: Supplementary file 7. [file elife-96852-supp7.xlsx]

## Sheet: SupTab_06_TADdiff
chr	Boundary	Gap_Score	TAD_Score1	TAD_Score2	Differential	Type	comp	stage_enriched		Table S7: Differential TAD boundaries
chr1	60000	11.3739	7.82844	2.77449	Shifted	Shifted	unstim.vs.8hr	Unstim
chr1	80000	-11.7542	3.24061	8.59382	Shifted	Shifted	unstim.vs.8hr	8hr
chr1	810000	2.90707	2.00778	0.716117	Differential	Complex	unstim.vs.8hr	Unstim
chr1	830000	-1.88511	0.654765	1.51486	Non-Differential	Non-Differential	unstim.vs.8hr	8hr
chr1	840000	-2.05008	2.0439	2.99457	Differential	Strength Change	unstim.vs.8hr	8hr
chr1	950000	-2.25687	0.564592	1.59178	Differential	Complex	unstim.vs.8hr	8hr
chr1	960000	-1.06476	1.01028	1.50345	Non-Differential	Non-Differential	unstim.vs.8hr	8hr
chr1	970000	-3.30605	0.244886	1.7429	Shifted	Shifted	unstim.vs.8hr	8hr
chr1	1000000	3.17136	1.7069	0.292251	Shifted	Shifted	unstim.vs.8hr	Unstim
chr1	1010000	5.94215	3.04212	0.389703	Shifted	Shifted	unstim.vs.8hr	Unstim
chr1	1060000	-3.05565	2.1332	3.53968	Shifted	Shifted	unstim.vs.8hr	8hr
chr1	1070000	-2.58138	1.24091	2.42264	Differential	Complex	unstim.vs.8hr	8hr
chr1	1130000	-1.04029	1.33841	1.82428	Non-Differential	Non-Differential	unstim.vs.8hr	8hr
chr1	1140000	-4.4812	2.27877	4.33164	Differential	Strength Change	unstim.vs.8hr	8hr
chr1	1150000	1.09462	2.88479	2.42291	Non-Differential	Non-Differential	unstim.vs.8hr	Unstim
chr1	1450000	-1.27071	1.23763	1.82656	Non-Differential	Non-Differential	unstim.vs.8hr	8hr
chr1	1570000	-1.99848	1.17766	2.09503	Non-Differential	Non-Differential	unstim.vs.8hr	8hr
chr1	1580000	1.20663	1.659	1.13236	Non-Differential	Non-Differential	unstim.vs.8hr	Unstim
chr1	1590000	2.07198	2.75728	1.85191	Differential	Strength Change	unstim.vs.8hr	Unstim
chr1	1640000	2.49696	1.6605	0.550311	Differential	Complex	unstim.vs.8hr	Unstim
chr1	1710000	-3.90964	0.651744	2.42742	Differential	Complex	unstim.vs.8hr	8hr
chr1	1720000	-2.30831	1.1392	2.19625	Differential	Complex	unstim.vs.8hr	8hr
chr1	1730000	1.44339	2.28615	1.65965	Non-Differential	Non-Differential	unstim.vs.8hr	Unstim
chr1	1740000	1.33625	1.54675	0.960205	Non-Differential	Non-Differential	unstim.vs.8hr	Unstim
chr1	1850000	-1.57959	2.95912	3.70753	Non-Differential	Non-Differential	unstim.vs.8hr	8hr
chr1	1860000	2.27482	2.78689	1.79013	Differential	Strength Change	unstim.vs.8hr	Unstim
chr1	2120000	0.758482	2.27837	1.96154	Non-Differential	Non-Differential	unstim.vs.8hr	Unstim
chr1	2130000	-1.54442	2.80039	3.53107	Non-Differential	Non-Differential	unstim.vs.8hr	8hr
chr1	2160000	3.08621	2.01196	0.639327	Differential	Split	unstim.vs.8hr	Unstim
chr1	2320000	0.937698	2.03453	1.63384	Non-Differential	Non-Differential	unstim.vs.8hr	Unstim
chr1	2340000	-0.585049	2.24037	2.53072	Non-Differential	Non-Differential	unstim.vs.8hr	8hr
chr1	2350000	-0.454933	1.43756	1.65984	Non-Differential	Non-Differential	unstim.vs.8hr	8hr
chr1	2450000	-1.43469	1.48738	2.15334	Non-Differential	Non-Differential	unstim.vs.8hr	8hr
chr1	2480000	3.53097	4.30572	2.75831	Differential	Strength Change	unstim.vs.8hr	Unstim
chr1	2610000	3.06095	7.99722	6.70483	Differential	Strength Change	unstim.vs.8hr	Unstim
chr1	2840000	1.26702	1.5049	0.949176	Non-Differential	Non-Differential	unstim.vs.8hr	Unstim
chr1	2930000	3.11707	3.09666	1.72254	Differential	Strength Change	unstim.vs.8hr	Unstim
chr1	2950000	-0.889173	1.134	1.54917	Non-Differential	Non-Differential	unstim.vs.8hr	8hr
chr1	3100000	1.59605	1.61984	0.916635	Non-Differential	Non-Differential	unstim.vs.8hr	Unstim
chr1	3260000	-0.315301	1.37865	1.5371	Non-Differential	Non-Differential	unstim.vs.8hr	8hr
chr1	3270000	-0.045565	1.66462	1.70437	Non-Differential	Non-Differential	unstim.vs.8hr	8hr
chr1	3390000	0.858602	1.7126	1.34398	Non-Differential	Non-Differential	unstim.vs.8hr	Unstim
chr1	3410000	-0.826353	1.54832	1.93985	Non-Differential	Non-Differential	unstim.vs.8hr	8hr
chr1	3560000	-1.59445	0.770305	1.50027	Non-Differential	Non-Differential	unstim.vs.8hr	8hr
chr1	3570000	0.392551	2.25778	2.10621	Non-Differential	Non-Differential	unstim.vs.8hr	Unstim
chr1	3580000	1.81205	1.59608	0.794916	Non-Differential	Non-Differential	unstim.vs.8hr	Unstim
chr1	3720000	-0.242391	1.89016	2.02152	Non-Differential	Non-Differential	unstim.vs.8hr	8hr
chr1	3820000	-0.858419	1.36795	1.77191	Non-Differential	Non-Differential	unstim.vs.8hr	8hr
chr1	3830000	0.961948	2.16113	1.75093	Non-Differential	Non-Differential	unstim.vs.8hr	Unstim
chr1	3990000	0.854258	2.35636	1.99711	Non-Differential	Non-Differential	unstim.vs.8hr	Unstim
chr1	4300000	0.166153	1.7108	1.65533	Non-Differential	Non-Differential	unstim.vs.8hr	Unstim
chr1	4450000	-0.361907	1.43439	1.61456	Non-Differential	Non-Differential	unstim.vs.8hr	8hr
chr1	4600000	0.61372	1.63148	1.37268	Non-Differential	Non-Differential	unstim.vs.8hr	Unstim
chr1	5040000	-1.39452	1.27054	1.91584	Non-Differential	Non-Differential	unstim.vs.8hr	8hr
chr1	5340000	1.25265	1.9164	1.37191	Non-Differential	Non-Differential	unstim.vs.8hr	Unstim
chr1	5350000	-1.1436	1.02774	1.55677	Non-Differential	Non-Differential	unstim.vs.8hr	8hr
chr1	5790000	-1.1723	1.40641	1.95277	Non-Differential	Non-Differential	unstim.vs.8hr	8hr
chr1	5800000	1.03298	1.57103	1.12191	Non-Differential	Non-Differential	unstim.vs.8hr	Unstim
chr1	6090000	-1.14919	1.22328	1.75708	Non-Differential	Non-Differential	unstim.vs.8hr	8hr
chr1	6100000	0.532753	1.75701	1.53627	Non-Differential	Non-Differential	unstim.vs.8hr	Unstim
chr1	6110000	-0.456145	1.59781	1.82248	Non-Differential	Non-Differential	unstim.vs.8hr	8hr
chr1	6240000	1.34738	2.04123	1.45534	Non-Differential	Non-Differential	unstim.vs.8hr	Unstim
chr1	6250000	0.118956	1.70832	1.67417	Non-Differential	Non-Differential	unstim.vs.8hr	Unstim
chr1	6260000	-0.973792	1.38515	1.84149	Non-Differential	Non-Differential	unstim.vs.8hr	8hr
chr1	6390000	1.2273	2.53725	2.01137	Non-Differential	Non-Differential	unstim.vs.8hr	Unstim
chr1	6400000	1.01383	4.24495	3.83524	Non-Differential	Non-Differential	unstim.vs.8hr	Unstim
chr1	6540000	2.53334	2.54109	1.42459	Differential	Split	unstim.vs.8hr	Unstim
chr1	6550000	-0.321307	3.54182	3.72786	Non-Differential	Non-Differential	unstim.vs.8hr	8hr
chr1	6560000	0.81842	1.77111	1.42134	Non-Differential	Non-Differential	unstim.vs.8hr	Unstim
chr1	6700000	-0.770553	1.48208	1.84761	Non-Differential	Non-Differential	unstim.vs.8hr	8hr
chr1	6710000	2.19595	2.42062	1.45531	Differential	Split	unstim.vs.8hr	Unstim
chr1	6840000	-1.05116	1.35175	1.84269	Non-Differential	Non-Differential	unstim.vs.8hr	8hr
chr1	6850000	0.184697	3.35314	3.30817	Non-Differential	Non-Differential	unstim.vs.8hr	Unstim
chr1	7000000	-0.489047	1.63916	1.87918	Non-Differential	Non-Differential	unstim.vs.8hr	8hr
chr1	7470000	0.372316	1.55362	1.4031	Non-Differential	Non-Differential	unstim.vs.8hr	Unstim
chr1	7710000	0.0912845	2.09722	2.08005	Non-Differential	Non-Differential	unstim.vs.8hr	Unstim
chr1	7720000	1.34175	3.40066	2.83295	Non-Differential	Non-Differential	unstim.vs.8hr	Unstim
chr1	7730000	-0.22195	2.01216	2.13567	Non-Differential	Non-Differential	unstim.vs.8hr	8hr
chr1	8190000	1.03959	1.64984	1.19864	Non-Differential	Non-Differential	unstim.vs.8hr	Unstim
chr1	8200000	2.23819	2.36427	1.37921	Differential	Split	unstim.vs.8hr	Unstim
chr1	8210000	0.405161	2.16313	2.00476	Non-Differential	Non-Differential	unstim.vs.8hr	Unstim
chr1	8360000	1.05754	1.9782	1.52266	Non-Differential	Non-Differential	unstim.vs.8hr	Unstim
chr1	8370000	0.642459	1.62372	1.35183	Non-Differential	Non-Differential	unstim.vs.8hr	Unstim
chr1	8480000	-2.55564	0.550435	1.71258	Differential	Merge	unstim.vs.8hr	8hr
chr1	8490000	0.425137	2.48255	2.31882	Non-Differential	Non-Differential	unstim.vs.8hr	Unstim
chr1	8620000	-0.87848	3.40738	3.84386	Non-Differential	Non-Differential	unstim.vs.8hr	8hr
chr1	8630000	-1.7312	1.35921	2.15779	Non-Differential	Non-Differential	unstim.vs.8hr	8hr
chr1	8790000	-0.409425	1.98308	2.19105	Non-Differential	Non-Differential	unstim.vs.8hr	8hr
chr1	8800000	0.703703	1.81829	1.52094	Non-Differential	Non-Differential	unstim.vs.8hr	Unstim
chr1	9070000	1.71713	2.41278	1.66393	Non-Differential	Non-Differential	unstim.vs.8hr	Unstim
chr1	9080000	0.490394	1.70016	1.49792	Non-Differential	Non-Differential	unstim.vs.8hr	Unstim
chr1	9260000	0.735135	2.23748	1.93074	Non-Differential	Non-Differential	unstim.vs.8hr	Unstim
chr1	9270000	0.998614	2.18123	1.75468	Non-Differential	Non-Differential	unstim.vs.8hr	Unstim
chr1	9350000	1.67801	1.6067	0.866283	Non-Differential	Non-Differential	unstim.vs.8hr	Unstim
chr1	9380000	-0.99642	1.35389	1.8201	Non-Differential	Non-Differential	unstim.vs.8hr	8hr
chr1	9550000	0.155586	2.38604	2.34311	Non-Differential	Non-Differential	unstim.vs.8hr	Unstim
chr1	9680000	1.40339	5.55535	4.98453	Non-Differential	Non-Differential	unstim.vs.8hr	Unstim
chr1	9690000	-2.17793	2.00279	3.01081	Differential	Strength Change	unstim.vs.8hr	8hr
chr1	9830000	-0.518741	1.78023	2.03531	Non-Differential	Non-Differential	unstim.vs.8hr	8hr
chr1	9840000	-2.56289	2.14316	3.3269	Differential	Strength Change	unstim.vs.8hr	8hr
chr1	10010000	0.599322	3.23007	2.99617	Non-Differential	Non-Differential	unstim.vs.8hr	Unstim
chr1	10020000	0.83558	1.50846	1.14791	Non-Differential	Non-Differential	unstim.vs.8hr	Unstim
chr1	10300000	0.704264	1.77558	1.47749	Non-Differential	Non-Differential	unstim.vs.8hr	Unstim
chr1	10490000	-2.31498	0.969083	2.0272	Differential	Merge	unstim.vs.8hr	8hr
chr1	10560000	-0.310141	1.56428	1.72253	Non-Differential	Non-Differential	unstim.vs.8hr	8hr
chr1	10570000	-1.65411	1.45636	2.2212	Non-Differential	Non-Differential	unstim.vs.8hr	8hr
chr1	10750000	-1.8655	1.32181	2.1807	Non-Differential	Non-Differential	unstim.vs.8hr	8hr
chr1	10910000	1.49638	2.09559	1.44293	Non-Differential	Non-Differential	unstim.vs.8hr	Unstim
chr1	11060000	0.761458	1.62761	1.30195	Non-Differential	Non-Differential	unstim.vs.8hr	Unstim
chr1	11070000	-1.37511	1.10115	1.73572	Non-Differential	Non-Differential	unstim.vs.8hr	8hr
chr1	11190000	0.953677	1.58731	1.17425	Non-Differential	Non-Differential	unstim.vs.8hr	Unstim
chr1	11360000	1.87858	2.57087	1.75083	Non-Differential	Non-Differential	unstim.vs.8hr	Unstim
chr1	11370000	2.38106	2.41253	1.36341	Differential	Split	unstim.vs.8hr	Unstim
chr1	11690000	0.793968	1.53192	1.19045	Non-Differential	Non-Differential	unstim.vs.8hr	Unstim
chr1	11700000	1.07027	2.38614	1.92954	Non-Differential	Non-Differential	unstim.vs.8hr	Unstim
chr1	11790000	-1.08953	1.28831	1.79587	Non-Differential	Non-Differential	unstim.vs.8hr	8hr
chr1	11800000	-0.778315	1.51965	1.88913	Non-Differential	Non-Differential	unstim.vs.8hr	8hr
chr1	11810000	0.607329	1.77717	1.52294	Non-Differential	Non-Differential	unstim.vs.8hr	Unstim
chr1	11960000	0.299163	2.45741	2.35036	Non-Differential	Non-Differential	unstim.vs.8hr	Unstim
chr1	11970000	0.0239143	4.97608	5.02248	Non-Differential	Non-Differential	unstim.vs.8hr	Unstim
chr1	12090000	0.884374	1.56318	1.18119	Non-Differential	Non-Differential	unstim.vs.8hr	Unstim
chr1	12100000	1.16332	1.69731	1.19071	Non-Differential	Non-Differential	unstim.vs.8hr	Unstim
chr1	12180000	-1.25782	2.75538	3.35593	Non-Differential	Non-Differential	unstim.vs.8hr	8hr
chr1	12190000	-1.67696	2.00005	2.78147	Non-Differential	Non-Differential	unstim.vs.8hr	8hr
chr1	12270000	0.144693	3.44886	3.42308	Non-Differential	Non-Differential	unstim.vs.8hr	Unstim
chr1	12280000	0.103437	1.69787	1.67061	Non-Differential	Non-Differential	unstim.vs.8hr	Unstim
chr1	12570000	0.816239	2.65604	2.31743	Non-Differential	Non-Differential	unstim.vs.8hr	Unstim
chr1	12580000	-4.60167	1.39071	3.48785	Differential	Complex	unstim.vs.8hr	8hr
chr1	12680000	-3.20621	1.30482	2.76987	Differential	Complex	unstim.vs.8hr	8hr
chr1	12720000	1.37576	1.61857	1.01498	Non-Differential	Non-Differential	unstim.vs.8hr	Unstim
chr1	12840000	-1.4053	2.51987	3.18441	Non-Differential	Non-Differential	unstim.vs.8hr	8hr
chr1	12850000	2.24165	2.6713	1.6882	Differential	Strength Change	unstim.vs.8hr	Unstim
chr1	12930000	1.89128	1.51806	0.68017	Non-Differential	Non-Differential	unstim.vs.8hr	Unstim
chr1	12940000	-4.43812	2.46007	4.49554	Differential	Strength Change	unstim.vs.8hr	8hr
chr1	12950000	-11.0552	-0.717688	4.27391	Differential	Complex	unstim.vs.8hr	8hr
chr1	12960000	-3.14979	0.304625	1.73265	Shifted	Shifted	unstim.vs.8hr	8hr
chr1	12980000	19.9849	8.72713	-0.210888	Shifted	Shifted	unstim.vs.8hr	Unstim
chr1	13040000	28.5541	15.0598	2.31903	Differential	Strength Change	unstim.vs.8hr	Unstim
chr1	13140000	7.7126	3.19203	-0.259369	Shifted	Shifted	unstim.vs.8hr	Unstim
chr1	13170000	-5.8679	7.34779	10.0861	Shifted	Shifted	unstim.vs.8hr	8hr
chr1	13190000	-2.86027	0.327368	1.62472	Differential	Complex	unstim.vs.8hr	8hr
chr1	13850000	-0.401777	1.49303	1.69191	Non-Differential	Non-Differential	unstim.vs.8hr	8hr
chr1	13980000	1.72003	2.79766	2.05193	Non-Differential	Non-Differential	unstim.vs.8hr	Unstim
chr1	13990000	0.152373	2.62779	2.58909	Non-Differential	Non-Differential	unstim.vs.8hr	Unstim
chr1	14140000	-0.665861	1.7541	2.07541	Non-Differential	Non-Differential	unstim.vs.8hr	8hr
chr1	14150000	0.104458	1.7487	1.72157	Non-Differential	Non-Differential	unstim.vs.8hr	Unstim
chr1	14590000	-1.35707	1.17427	1.80152	Non-Differential	Non-Differential	unstim.vs.8hr	8hr
chr1	14750000	0.414844	1.71241	1.54448	Non-Differential	Non-Differential	unstim.vs.8hr	Unstim
chr1	15060000	-0.132913	1.49118	1.56844	Non-Differential	Non-Differential	unstim.vs.8hr	8hr
chr1	15360000	0.47155	1.57781	1.38269	Non-Differential	Non-Differential	unstim.vs.8hr	Unstim
chr1	15630000	-0.386684	1.31607	1.50609	Non-Differential	Non-Differential	unstim.vs.8hr	8hr
chr1	15640000	-0.989075	1.64882	2.1151	Non-Differential	Non-Differential	unstim.vs.8hr	8hr
chr1	15650000	-0.133633	2.24486	2.33111	Non-Differential	Non-Differential	unstim.vs.8hr	8hr
chr1	15850000	-1.41363	1.0713	1.72295	Non-Differential	Non-Differential	unstim.vs.8hr	8hr
chr1	15940000	-1.46011	1.09747	1.77044	Non-Differential	Non-Differential	unstim.vs.8hr	8hr
chr1	15950000	0.859714	2.00288	1.63709	Non-Differential	Non-Differential	unstim.vs.8hr	Unstim
chr1	16120000	-0.512422	1.34185	1.58903	Non-Differential	Non-Differential	unstim.vs.8hr	8hr
chr1	16240000	-3.0505	0.478599	1.86372	Differential	Merge	unstim.vs.8hr	8hr
chr1	16250000	-1.40747	1.93329	2.59206	Non-Differential	Non-Differential	unstim.vs.8hr	8hr
chr1	16260000	1.73941	2.13326	1.37112	Non-Differential	Non-Differential	unstim.vs.8hr	Unstim
chr1	16390000	1.24977	3.15021	2.62122	Non-Differential	Non-Differential	unstim.vs.8hr	Unstim
chr1	16400000	0.0214591	2.64424	2.66494	Non-Differential	Non-Differential	unstim.vs.8hr	Unstim
chr1	16410000	-1.27333	1.07583	1.66408	Non-Differential	Non-Differential	unstim.vs.8hr	8hr
chr1	16570000	0.319338	1.82588	1.70245	Non-Differential	Non-Differential	unstim.vs.8hr	Unstim
chr1	16580000	1.05477	1.68142	1.22373	Non-Differential	Non-Differential	unstim.vs.8hr	Unstim
chr1	16690000	-0.0669652	3.40875	3.47824	Non-Differential	Non-Differential	unstim.vs.8hr	8hr
chr1	16700000	-1.33061	1.45736	2.0759	Non-Differential	Non-Differential	unstim.vs.8hr	8hr
chr1	16870000	0.93189	1.91019	1.51069	Non-Differential	Non-Differential	unstim.vs.8hr	Unstim
chr1	16880000	0.682275	1.55168	1.26095	Non-Differential	Non-Differential	unstim.vs.8hr	Unstim
chr1	16980000	-4.65569	0.26048	2.36906	Shifted	Shifted	unstim.vs.8hr	8hr
chr1	17000000	4.86812	8.46834	6.36406	Shifted	Shifted	unstim.vs.8hr	Unstim
chr1	17060000	2.41637	2.36184	1.29617	Differential	Complex	unstim.vs.8hr	Unstim
chr1	17170000	10.6957	6.75385	1.99425	Differential	Strength Change	unstim.vs.8hr	Unstim
chr1	17230000	-6.43788	0.312061	3.22725	Differential	Complex	unstim.vs.8hr	8hr
chr1	17240000	-7.18113	0.0550408	3.30342	Differential	Complex	unstim.vs.8hr	8hr
chr1	17380000	2.99438	5.06101	3.76496	Differential	Strength Change	unstim.vs.8hr	Unstim
chr1	17450000	-0.394097	3.7279	3.949	Non-Differential	Non-Differential	unstim.vs.8hr	8hr
chr1	17460000	0.90189	1.55212	1.16208	Non-Differential	Non-Differential	unstim.vs.8hr	Unstim
chr1	17560000	-1.07558	1.47074	1.97409	Non-Differential	Non-Differential	unstim.vs.8hr	8hr
chr1	17820000	0.0929086	2.00713	1.98819	Non-Differential	Non-Differential	unstim.vs.8hr	Unstim
chr1	17940000	-1.01888	1.39446	1.87129	Non-Differential	Non-Differential	unstim.vs.8hr	8hr
chr1	18090000	-0.593666	1.44706	1.73219	Non-Differential	Non-Differential	unstim.vs.8hr	8hr
chr1	18380000	-0.258008	1.4721	1.60571	Non-Differential	Non-Differential	unstim.vs.8hr	8hr
chr1	18540000	-0.31343	1.40068	1.55854	Non-Differential	Non-Differential	unstim.vs.8hr	8hr
chr1	18850000	-0.780529	1.23492	1.60212	Non-Differential	Non-Differential	unstim.vs.8hr	8hr
chr1	19010000	1.86158	3.83394	3.03611	Non-Differential	Non-Differential	unstim.vs.8hr	Unstim
chr1	19020000	1.8453	2.83544	2.03348	Non-Differential	Non-Differential	unstim.vs.8hr	Unstim
chr1	19150000	-0.679103	1.23934	1.56072	Non-Differential	Non-Differential	unstim.vs.8hr	8hr
chr1	19290000	-0.823124	1.15092	1.53642	Non-Differential	Non-Differential	unstim.vs.8hr	8hr
chr1	19300000	0.308775	3.39278	3.29215	Non-Differential	Non-Differential	unstim.vs.8hr	Unstim
chr1	19310000	2.23114	2.91177	1.9362	Differential	Strength Change	unstim.vs.8hr	Unstim
chr1	19420000	-1.37768	0.946867	1.58082	Non-Differential	Non-Differential	unstim.vs.8hr	8hr
chr1	19430000	0.977577	1.51198	1.08725	Non-Differential	Non-Differential	unstim.vs.8hr	Unstim
chr1	19580000	-1.61304	1.89091	2.64217	Non-Differential	Non-Differential	unstim.vs.8hr	8hr
chr1	19590000	0.704372	2.13883	1.84487	Non-Differential	Non-Differential	unstim.vs.8hr	Unstim
chr1	19720000	-1.23939	1.71112	2.29132	Non-Differential	Non-Differential	unstim.vs.8hr	8hr
chr1	19900000	1.64579	2.21996	1.50116	Non-Differential	Non-Differential	unstim.vs.8hr	Unstim
chr1	19910000	2.18161	3.70773	2.76371	Differential	Strength Change	unstim.vs.8hr	Unstim
chr1	19920000	-1.26546	1.5881	2.17868	Non-Differential	Non-Differential	unstim.vs.8hr	8hr
chr1	20040000	1.77872	3.12087	2.35231	Non-Differential	Non-Differential	unstim.vs.8hr	Unstim
chr1	20050000	1.42902	1.74518	1.11896	Non-Differential	Non-Differential	unstim.vs.8hr	Unstim
chr1	20210000	0.106985	1.61401	1.58419	Non-Differential	Non-Differential	unstim.vs.8hr	Unstim
chr1	20330000	-0.37975	1.41881	1.60687	Non-Differential	Non-Differential	unstim.vs.8hr	8hr
chr1	20480000	-2.6833	2.62464	3.86837	Differential	Strength Change	unstim.vs.8hr	8hr
chr1	20640000	0.839105	1.78302	1.42403	Non-Differential	Non-Differential	unstim.vs.8hr	Unstim
chr1	20650000	-1.67271	1.33113	2.10294	Non-Differential	Non-Differential	unstim.vs.8hr	8hr
chr1	20810000	-0.442384	1.35706	1.57274	Non-Differential	Non-Differential	unstim.vs.8hr	8hr
chr1	20820000	-1.02107	1.06978	1.54388	Non-Differential	Non-Differential	unstim.vs.8hr	8hr
chr1	20950000	1.09846	2.56465	2.09735	Non-Differential	Non-Differential	unstim.vs.8hr	Unstim
chr1	20960000	0.800587	2.26859	1.9326	Non-Differential	Non-Differential	unstim.vs.8hr	Unstim
chr1	21070000	2.67839	1.76868	0.577693	Differential	Split	unstim.vs.8hr	Unstim
chr1	21230000	-0.323009	1.3833	1.54529	Non-Differential	Non-Differential	unstim.vs.8hr	8hr
chr1	21380000	1.06282	1.71499	1.25404	Non-Differential	Non-Differential	unstim.vs.8hr	Unstim
chr1	21540000	-0.190489	1.79447	1.90126	Non-Differential	Non-Differential	unstim.vs.8hr	8hr
chr1	21550000	0.288507	1.59099	1.47881	Non-Differential	Non-Differential	unstim.vs.8hr	Unstim
chr1	21680000	1.70285	1.55541	0.803163	Non-Differential	Non-Differential	unstim.vs.8hr	Unstim
chr1	21690000	-0.672998	1.78452	2.10941	Non-Differential	Non-Differential	unstim.vs.8hr	8hr
chr1	21700000	-0.269413	2.86103	3.01578	Non-Differential	Non-Differential	unstim.vs.8hr	8hr
chr1	21980000	0.424691	1.64203	1.46884	Non-Differential	Non-Differential	unstim.vs.8hr	Unstim
chr1	21990000	-0.620122	1.54821	1.84647	Non-Differential	Non-Differential	unstim.vs.8hr	8hr
chr1	22130000	0.316123	1.59265	1.468	Non-Differential	Non-Differential	unstim.vs.8hr	Unstim
chr1	22140000	0.506149	1.54148	1.33029	Non-Differential	Non-Differential	unstim.vs.8hr	Unstim
chr1	22430000	-0.818902	1.39689	1.78331	Non-Differential	Non-Differential	unstim.vs.8hr	8hr
chr1	22440000	0.408776	2.26168	2.10281	Non-Differential	Non-Differential	unstim.vs.8hr	Unstim
chr1	22590000	0.574191	1.5227	1.28053	Non-Differential	Non-Differential	unstim.vs.8hr	Unstim
chr1	22740000	-0.156423	1.86843	1.96066	Non-Differential	Non-Differential	unstim.vs.8hr	8hr
chr1	22890000	0.309705	1.551	1.42876	Non-Differential	Non-Differential	unstim.vs.8hr	Unstim
chr1	22900000	-0.0624014	1.57919	1.62557	Non-Differential	Non-Differential	unstim.vs.8hr	8hr
chr1	23030000	0.54064	1.50936	1.28221	Non-Differential	Non-Differential	unstim.vs.8hr	Unstim
chr1	23040000	0.412165	1.59956	1.43155	Non-Differential	Non-Differential	unstim.vs.8hr	Unstim
chr1	23190000	-0.558074	1.75701	2.02961	Non-Differential	Non-Differential	unstim.vs.8hr	8hr
chr1	23330000	0.993843	1.70561	1.27575	Non-Differential	Non-Differential	unstim.vs.8hr	Unstim
chr1	23340000	0.542694	2.06591	1.84423	Non-Differential	Non-Differential	unstim.vs.8hr	Unstim
chr1	23430000	-2.70143	0.356769	1.58262	Differential	Merge	unstim.vs.8hr	8hr
chr1	23510000	-1.90277	2.69681	3.58836	Non-Differential	Non-Differential	unstim.vs.8hr	8hr
chr1	23520000	2.00996	4.10512	3.24329	Differential	Strength Change	unstim.vs.8hr	Unstim
chr1	23610000	-0.543278	2.17909	2.44985	Non-Differential	Non-Differential	unstim.vs.8hr	8hr
chr1	23800000	0.888751	1.95802	1.57859	Non-Differential	Non-Differential	unstim.vs.8hr	Unstim
chr1	23810000	0.680025	2.81774	2.54259	Non-Differential	Non-Differential	unstim.vs.8hr	Unstim
chr1	23870000	-1.7633	1.29773	2.11012	Non-Differential	Non-Differential	unstim.vs.8hr	8hr
chr1	23880000	-2.13395	1.32915	2.30954	Differential	Complex	unstim.vs.8hr	8hr
chr1	23960000	-2.28019	2.65427	3.71603	Shifted	Shifted	unstim.vs.8hr	8hr
chr1	23970000	2.48993	4.89003	3.82016	Shifted	Shifted	unstim.vs.8hr	Unstim
chr1	24070000	0.96393	1.79543	1.38013	Non-Differential	Non-Differential	unstim.vs.8hr	Unstim
chr1	24090000	-0.23656	1.56242	1.68737	Non-Differential	Non-Differential	unstim.vs.8hr	8hr
chr1	24100000	0.297577	1.91019	1.79758	Non-Differential	Non-Differential	unstim.vs.8hr	Unstim
chr1	24250000	1.62263	1.5256	0.809294	Non-Differential	Non-Differential	unstim.vs.8hr	Unstim
chr1	24260000	1.26527	1.6431	1.08976	Non-Differential	Non-Differential	unstim.vs.8hr	Unstim
chr1	24530000	-2.29038	2.13712	3.19754	Differential	Strength Change	unstim.vs.8hr	8hr
chr1	24540000	0.4399	2.07845	1.9034	Non-Differential	Non-Differential	unstim.vs.8hr	Unstim
chr1	24710000	0.787321	2.12506	1.79342	Non-Differential	Non-Differential	unstim.vs.8hr	Unstim
chr1	24720000	-2.85782	2.51466	3.83606	Differential	Strength Change	unstim.vs.8hr	8hr
chr1	24860000	0.5274	3.56996	3.37249	Non-Differential	Non-Differential	unstim.vs.8hr	Unstim
chr1	24870000	-0.190618	2.96472	3.08502	Non-Differential	Non-Differential	unstim.vs.8hr	8hr
chr1	24970000	-1.97644	2.71532	3.64041	Non-Differential	Non-Differential	unstim.vs.8hr	8hr
chr1	25160000	0.900482	3.07602	2.70414	Non-Differential	Non-Differential	unstim.vs.8hr	Unstim
chr1	25170000	-1.90006	1.66289	2.54133	Non-Differential	Non-Differential	unstim.vs.8hr	8hr
chr1	25250000	-2.20027	2.82388	3.85145	Differential	Strength Change	unstim.vs.8hr	8hr
chr1	25260000	-0.985999	1.7258	2.19157	Non-Differential	Non-Differential	unstim.vs.8hr	8hr
chr1	25360000	0.838604	1.97279	1.61621	Non-Differential	Non-Differential	unstim.vs.8hr	Unstim
chr1	25430000	-1.86264	0.897234	1.74995	Non-Differential	Non-Differential	unstim.vs.8hr	8hr
chr1	25440000	0.330004	2.56814	2.44843	Non-Differential	Non-Differential	unstim.vs.8hr	Unstim
chr1	25450000	1.46816	1.74125	1.09728	Non-Differential	Non-Differential	unstim.vs.8hr	Unstim
chr1	25540000	1.91528	1.87902	1.03442	Non-Differential	Non-Differential	unstim.vs.8hr	Unstim
chr1	25550000	1.61162	3.44133	2.75204	Non-Differential	Non-Differential	unstim.vs.8hr	Unstim
chr1	25560000	-0.733868	3.75652	4.13162	Non-Differential	Non-Differential	unstim.vs.8hr	8hr
chr1	25720000	1.40004	2.31513	1.70857	Non-Differential	Non-Differential	unstim.vs.8hr	Unstim
chr1	25730000	-0.0932409	1.45646	1.51538	Non-Differential	Non-Differential	unstim.vs.8hr	8hr
chr1	25930000	3.09517	2.89056	1.52397	Differential	Strength Change	unstim.vs.8hr	Unstim
chr1	25940000	2.2854	2.69763	1.69506	Differential	Strength Change	unstim.vs.8hr	Unstim
chr1	26020000	-0.57556	1.66862	1.94812	Non-Differential	Non-Differential	unstim.vs.8hr	8hr
chr1	26030000	0.202063	1.90122	1.83169	Non-Differential	Non-Differential	unstim.vs.8hr	Unstim
chr1	26150000	2.13739	2.20508	1.26378	Differential	Split	unstim.vs.8hr	Unstim
chr1	26330000	1.07401	2.50243	2.04548	Non-Differential	Non-Differential	unstim.vs.8hr	Unstim
chr1	26340000	2.01954	1.91239	1.02103	Differential	Split	unstim.vs.8hr	Unstim
chr1	26490000	-0.754268	3.6386	4.02156	Non-Differential	Non-Differential	unstim.vs.8hr	8hr
chr1	26500000	-0.611963	2.48295	2.78827	Non-Differential	Non-Differential	unstim.vs.8hr	8hr
chr1	26600000	8.56815	5.61463	1.80416	Differential	Strength Change	unstim.vs.8hr	Unstim
chr1	26610000	3.40502	2.31864	0.805347	Differential	Complex	unstim.vs.8hr	Unstim
chr1	26650000	2.50912	6.26873	5.20604	Shifted	Shifted	unstim.vs.8hr	Unstim
chr1	26660000	-2.03679	2.13109	3.07675	Shifted	Shifted	unstim.vs.8hr	8hr
chr1	26800000	-1.22386	3.49026	4.0839	Non-Differential	Non-Differential	unstim.vs.8hr	8hr
chr1	26920000	2.17059	2.82881	1.87966	Differential	Strength Change	unstim.vs.8hr	Unstim
chr1	26930000	-1.12443	2.09888	2.63154	Non-Differential	Non-Differential	unstim.vs.8hr	8hr
chr1	27110000	-1.10986	2.25472	2.78259	Non-Differential	Non-Differential	unstim.vs.8hr	8hr
chr1	27120000	-0.109393	4.16958	4.267	Non-Differential	Non-Differential	unstim.vs.8hr	8hr
chr1	27130000	0.514199	1.58961	1.37534	Non-Differential	Non-Differential	unstim.vs.8hr	Unstim
chr1	27230000	0.683976	1.88053	1.59282	Non-Differential	Non-Differential	unstim.vs.8hr	Unstim
chr1	27250000	0.212792	1.55983	1.48153	Non-Differential	Non-Differential	unstim.vs.8hr	Unstim
chr1	27370000	-2.20656	0.624709	1.62983	Differential	Complex	unstim.vs.8hr	8hr
chr1	27430000	2.18233	2.55798	1.60041	Differential	Strength Change	unstim.vs.8hr	Unstim
chr1	27510000	-0.910432	1.15412	1.57915	Non-Differential	Non-Differential	unstim.vs.8hr	8hr
chr1	27520000	-1.79546	2.24438	3.0822	Non-Differential	Non-Differential	unstim.vs.8hr	8hr
chr1	27530000	-0.440177	1.4832	1.69933	Non-Differential	Non-Differential	unstim.vs.8hr	8hr
chr1	27720000	0.0733465	4.50777	4.52643	Non-Differential	Non-Differential	unstim.vs.8hr	Unstim
chr1	27730000	0.546484	3.51388	3.30714	Non-Differential	Non-Differential	unstim.vs.8hr	Unstim
chr1	27850000	-0.212149	2.82124	2.94963	Non-Differential	Non-Differential	unstim.vs.8hr	8hr
chr1	27990000	-0.574846	3.33415	3.63247	Non-Differential	Non-Differential	unstim.vs.8hr	8hr
chr1	28000000	0.359593	4.60079	4.49106	Non-Differential	Non-Differential	unstim.vs.8hr	Unstim
chr1	28160000	-1.52554	1.72708	2.43688	Non-Differential	Non-Differential	unstim.vs.8hr	8hr
chr1	28180000	2.54078	2.3684	1.24654	Differential	Split	unstim.vs.8hr	Unstim
chr1	28310000	1.015	2.43482	2.00377	Non-Differential	Non-Differential	unstim.vs.8hr	Unstim
chr1	28320000	2.88101	2.76221	1.491	Differential	Complex	unstim.vs.8hr	Unstim
chr1	28420000	-2.02958	3.15512	4.1093	Differential	Strength Change	unstim.vs.8hr	8hr
chr1	28430000	1.79366	2.03842	1.25066	Non-Differential	Non-Differential	unstim.vs.8hr	Unstim
chr1	28560000	1.41473	1.9829	1.36587	Non-Differential	Non-Differential	unstim.vs.8hr	Unstim
chr1	28570000	-0.220555	2.24846	2.37407	Non-Differential	Non-Differential	unstim.vs.8hr	8hr
chr1	28740000	1.2711	1.92036	1.36757	Non-Differential	Non-Differential	unstim.vs.8hr	Unstim
chr1	28840000	-5.92278	-0.026848	2.65149	Differential	Complex	unstim.vs.8hr	8hr
chr1	28910000	2.48995	2.58928	1.49295	Differential	Complex	unstim.vs.8hr	Unstim
chr1	28970000	2.57039	1.57516	0.430788	Differential	Complex	unstim.vs.8hr	Unstim
chr1	29060000	-1.89676	1.80865	2.68728	Non-Differential	Non-Differential	unstim.vs.8hr	8hr
chr1	29070000	-0.816587	2.03976	2.43253	Non-Differential	Non-Differential	unstim.vs.8hr	8hr
chr1	29200000	0.745969	3.04072	2.73831	Non-Differential	Non-Differential	unstim.vs.8hr	Unstim
chr1	29210000	-0.812219	4.84646	5.26953	Non-Differential	Non-Differential	unstim.vs.8hr	8hr
chr1	29360000	-1.18504	1.30385	1.85479	Non-Differential	Non-Differential	unstim.vs.8hr	8hr
chr1	29510000	-2.05745	1.18953	2.13371	Differential	Merge	unstim.vs.8hr	8hr
chr1	29530000	0.985473	1.6775	1.2511	Non-Differential	Non-Differential	unstim.vs.8hr	Unstim
chr1	29630000	-0.724141	1.1894	1.53058	Non-Differential	Non-Differential	unstim.vs.8hr	8hr
chr1	29800000	-0.84235	1.3033	1.69925	Non-Differential	Non-Differential	unstim.vs.8hr	8hr
chr1	30090000	-0.839877	1.28811	1.68276	Non-Differential	Non-Differential	unstim.vs.8hr	8hr
chr1	30380000	1.03525	1.61745	1.16785	Non-Differential	Non-Differential	unstim.vs.8hr	Unstim
chr1	30820000	0.105057	1.59492	1.56574	Non-Differential	Non-Differential	unstim.vs.8hr	Unstim
chr1	30970000	0.160009	2.2553	2.20887	Non-Differential	Non-Differential	unstim.vs.8hr	Unstim
chr1	30990000	-0.303686	1.36956	1.52265	Non-Differential	Non-Differential	unstim.vs.8hr	8hr
chr1	31260000	0.489866	2.71265	2.5223	Non-Differential	Non-Differential	unstim.vs.8hr	Unstim
chr1	31270000	-0.02959	2.55714	2.59993	Non-Differential	Non-Differential	unstim.vs.8hr	8hr
chr1	31410000	-0.0965803	2.10824	2.17616	Non-Differential	Non-Differential	unstim.vs.8hr	8hr
chr1	31730000	-0.251867	1.76387	1.89806	Non-Differential	Non-Differential	unstim.vs.8hr	8hr
chr1	31900000	-0.174884	1.41436	1.50972	Non-Differential	Non-Differential	unstim.vs.8hr	8hr
chr1	32020000	-1.22491	1.386	1.95591	Non-Differential	Non-Differential	unstim.vs.8hr	8hr
chr1	32030000	-0.957378	1.50063	1.95087	Non-Differential	Non-Differential	unstim.vs.8hr	8hr
chr1	32140000	6.83342	2.64051	-0.419619	Differential	Complex	unstim.vs.8hr	Unstim
chr1	32150000	5.58754	2.76655	0.271335	Shifted	Shifted	unstim.vs.8hr	Unstim
chr1	32170000	-4.10909	0.11122	1.97088	Shifted	Shifted	unstim.vs.8hr	8hr
chr1	32180000	-4.56762	-0.409799	1.65125	Differential	Complex	unstim.vs.8hr	8hr
chr1	32280000	-1.15354	1.04465	1.57837	Non-Differential	Non-Differential	unstim.vs.8hr	8hr
chr1	32290000	-2.71109	0.996383	2.23396	Differential	Merge	unstim.vs.8hr	8hr
chr1	32480000	-0.427201	2.48413	2.7059	Non-Differential	Non-Differential	unstim.vs.8hr	8hr
chr1	32640000	0.330071	2.36871	2.24667	Non-Differential	Non-Differential	unstim.vs.8hr	Unstim
chr1	32760000	4.91741	2.80045	0.608701	Shifted	Shifted	unstim.vs.8hr	Unstim
chr1	32800000	-2.75728	1.61605	2.88164	Shifted	Shifted	unstim.vs.8hr	8hr
chr1	32900000	1.55492	2.31853	1.64196	Non-Differential	Non-Differential	unstim.vs.8hr	Unstim
chr1	32910000	-0.78672	1.19317	1.56269	Non-Differential	Non-Differential	unstim.vs.8hr	8hr
chr1	33080000	-1.40487	1.20621	1.85545	Non-Differential	Non-Differential	unstim.vs.8hr	8hr
chr1	33240000	-0.866756	2.5444	2.96566	Non-Differential	Non-Differential	unstim.vs.8hr	8hr
chr1	33250000	1.56248	2.63451	1.95816	Non-Differential	Non-Differential	unstim.vs.8hr	Unstim
chr1	33390000	0.453525	1.80544	1.62109	Non-Differential	Non-Differential	unstim.vs.8hr	Unstim
chr1	33660000	2.67077	1.79253	0.605259	Differential	Split	unstim.vs.8hr	Unstim
chr1	33840000	-0.455452	2.97541	3.21561	Non-Differential	Non-Differential	unstim.vs.8hr	8hr
chr1	33850000	0.530069	2.0299	1.81351	Non-Differential	Non-Differential	unstim.vs.8hr	Unstim
chr1	34140000	0.187545	2.01476	1.9531	Non-Differential	Non-Differential	unstim.vs.8hr	Unstim
chr1	34300000	-0.79425	1.27281	1.64666	Non-Differential	Non-Differential	unstim.vs.8hr	8hr
chr1	34720000	-0.197893	2.13781	2.25189	Non-Differential	Non-Differential	unstim.vs.8hr	8hr
chr1	34880000	0.686067	1.64275	1.35135	Non-Differential	Non-Differential	unstim.vs.8hr	Unstim
chr1	35030000	0.46946	1.91133	1.72099	Non-Differential	Non-Differential	unstim.vs.8hr	Unstim
chr1	35330000	-2.84307	1.16674	2.46596	Differential	Merge	unstim.vs.8hr	8hr
chr1	35340000	0.202584	1.56845	1.49486	Non-Differential	Non-Differential	unstim.vs.8hr	Unstim
chr1	35630000	2.1436	2.03914	1.09312	Differential	Split	unstim.vs.8hr	Unstim
chr1	35650000	-1.47484	1.01606	1.69475	Non-Differential	Non-Differential	unstim.vs.8hr	8hr
chr1	35660000	-2.83816	0.487842	1.77704	Differential	Complex	unstim.vs.8hr	8hr
chr1	35770000	2.11106	2.04358	1.11233	Differential	Complex	unstim.vs.8hr	Unstim
chr1	35780000	0.580882	2.31059	2.07444	Non-Differential	Non-Differential	unstim.vs.8hr	Unstim
chr1	35900000	1.67011	2.02061	1.28852	Non-Differential	Non-Differential	unstim.vs.8hr	Unstim
chr1	35910000	0.58114	2.87577	2.64602	Non-Differential	Non-Differential	unstim.vs.8hr	Unstim
chr1	36050000	1.52373	1.94975	1.28305	Non-Differential	Non-Differential	unstim.vs.8hr	Unstim
chr1	36240000	-0.313399	2.29421	2.46233	Non-Differential	Non-Differential	unstim.vs.8hr	8hr
chr1	36350000	-0.83331	1.83156	2.2295	Non-Differential	Non-Differential	unstim.vs.8hr	8hr
chr1	36540000	0.341201	1.83257	1.69933	Non-Differential	Non-Differential	unstim.vs.8hr	Unstim
chr1	36550000	0.0893529	2.93771	2.93108	Non-Differential	Non-Differential	unstim.vs.8hr	Unstim
chr1	36610000	3.3666	1.74628	0.24378	Differential	Complex	unstim.vs.8hr	Unstim
chr1	36660000	4.05371	3.32536	1.53027	Differential	Strength Change	unstim.vs.8hr	Unstim
chr1	36670000	0.432651	1.82153	1.64681	Non-Differential	Non-Differential	unstim.vs.8hr	Unstim
chr1	36690000	-1.29944	2.10982	2.72177	Non-Differential	Non-Differential	unstim.vs.8hr	8hr
chr1	36790000	2.16908	1.68007	0.718399	Differential	Complex	unstim.vs.8hr	Unstim
chr1	36800000	2.74823	4.06391	2.86773	Differential	Strength Change	unstim.vs.8hr	Unstim
chr1	36810000	-0.397729	1.68346	1.88269	Non-Differential	Non-Differential	unstim.vs.8hr	8hr
chr1	37280000	0.0605103	1.50329	1.49321	Non-Differential	Non-Differential	unstim.vs.8hr	Unstim
chr1	37730000	0.575947	1.81799	1.57841	Non-Differential	Non-Differential	unstim.vs.8hr	Unstim
chr1	37740000	-1.06921	1.22714	1.72482	Non-Differential	Non-Differential	unstim.vs.8hr	8hr
chr1	37900000	-0.372268	2.14896	2.34204	Non-Differential	Non-Differential	unstim.vs.8hr	8hr
chr1	37910000	0.405923	1.99603	1.8354	Non-Differential	Non-Differential	unstim.vs.8hr	Unstim
chr1	38020000	1.15163	1.59595	1.09347	Non-Differential	Non-Differential	unstim.vs.8hr	Unstim
chr1	38060000	-0.849425	1.4432	1.84395	Non-Differential	Non-Differential	unstim.vs.8hr	8hr
chr1	38160000	-1.94344	2.32366	3.22932	Non-Differential	Non-Differential	unstim.vs.8hr	8hr
chr1	38170000	2.41832	2.06497	0.995004	Differential	Complex	unstim.vs.8hr	Unstim
chr1	38330000	-2.19289	2.11062	3.12665	Differential	Strength Change	unstim.vs.8hr	8hr
chr1	38340000	0.734002	2.07206	1.76393	Non-Differential	Non-Differential	unstim.vs.8hr	Unstim
chr1	38490000	0.599033	2.48571	2.24337	Non-Differential	Non-Differential	unstim.vs.8hr	Unstim
chr1	38500000	1.81582	1.60041	0.797585	Non-Differential	Non-Differential	unstim.vs.8hr	Unstim
chr1	38940000	-0.192555	1.64287	1.74884	Non-Differential	Non-Differential	unstim.vs.8hr	8hr
chr1	39060000	0.740666	1.61904	1.30268	Non-Differential	Non-Differential	unstim.vs.8hr	Unstim
chr1	39070000	0.488935	1.89179	1.69242	Non-Differential	Non-Differential	unstim.vs.8hr	Unstim
chr1	39350000	2.86769	2.91225	1.64879	Differential	Strength Change	unstim.vs.8hr	Unstim
chr1	39360000	1.35612	2.32708	1.74052	Non-Differential	Non-Differential	unstim.vs.8hr	Unstim
chr1	39560000	-1.37003	1.54013	2.17745	Non-Differential	Non-Differential	unstim.vs.8hr	8hr
chr1	39640000	1.53445	2.57848	1.91416	Non-Differential	Non-Differential	unstim.vs.8hr	Unstim
chr1	39650000	-2.4386	4.89862	6.05783	Differential	Strength Change	unstim.vs.8hr	8hr
chr1	39660000	1.55073	2.691	2.02061	Non-Differential	Non-Differential	unstim.vs.8hr	Unstim
chr1	39720000	-1.64329	0.934053	1.68799	Non-Differential	Non-Differential	unstim.vs.8hr	8hr
chr1	39730000	0.0450629	1.64634	1.64489	Non-Differential	Non-Differential	unstim.vs.8hr	Unstim
chr1	39820000	-0.902245	1.21102	1.633	Non-Differential	Non-Differential	unstim.vs.8hr	8hr
chr1	39830000	-0.24104	2.09136	2.22442	Non-Differential	Non-Differential	unstim.vs.8hr	8hr
chr1	39840000	0.673501	1.985	1.70323	Non-Differential	Non-Differential	unstim.vs.8hr	Unstim
chr1	39980000	-0.653678	2.54465	2.86955	Non-Differential	Non-Differential	unstim.vs.8hr	8hr
chr1	40120000	1.82297	4.68344	3.91284	Non-Differential	Non-Differential	unstim.vs.8hr	Unstim
chr1	40130000	-2.74725	3.21753	4.49701	Shifted	Shifted	unstim.vs.8hr	8hr
chr1	40180000	3.47574	1.83502	0.284183	Shifted	Shifted	unstim.vs.8hr	Unstim
chr1	40270000	0.439681	2.47509	2.3047	Non-Differential	Non-Differential	unstim.vs.8hr	Unstim
chr1	40280000	-0.552662	2.12625	2.40065	Non-Differential	Non-Differential	unstim.vs.8hr	8hr
chr1	40440000	0.855591	2.86329	2.50927	Non-Differential	Non-Differential	unstim.vs.8hr	Unstim
chr1	40450000	-1.24934	2.34044	2.93239	Non-Differential	Non-Differential	unstim.vs.8hr	8hr
chr1	40570000	1.5134	2.18379	1.52445	Non-Differential	Non-Differential	unstim.vs.8hr	Unstim
chr1	40730000	-2.76776	1.55704	2.82669	Differential	Strength Change	unstim.vs.8hr	8hr
chr1	40740000	1.28881	2.29871	1.74226	Non-Differential	Non-Differential	unstim.vs.8hr	Unstim
chr1	40880000	0.986592	3.03892	2.62767	Non-Differential	Non-Differential	unstim.vs.8hr	Unstim
chr1	41000000	-2.55071	0.434127	1.5927	Differential	Merge	unstim.vs.8hr	8hr
chr1	41160000	-1.66074	1.53074	2.29943	Non-Differential	Non-Differential	unstim.vs.8hr	8hr
chr1	41320000	-3.44846	0.322328	1.88564	Differential	Merge	unstim.vs.8hr	8hr
chr1	41330000	1.76101	2.99625	2.23426	Non-Differential	Non-Differential	unstim.vs.8hr	Unstim
chr1	41340000	1.12906	2.01027	1.52276	Non-Differential	Non-Differential	unstim.vs.8hr	Unstim
chr1	41480000	1.56767	1.64778	0.957729	Non-Differential	Non-Differential	unstim.vs.8hr	Unstim
chr1	41490000	1.02898	1.67036	1.2242	Non-Differential	Non-Differential	unstim.vs.8hr	Unstim
chr1	41620000	-1.88969	0.744623	1.60782	Non-Differential	Non-Differential	unstim.vs.8hr	8hr
chr1	41780000	-0.603542	1.37508	1.66385	Non-Differential	Non-Differential	unstim.vs.8hr	8hr
chr1	42040000	-2.83025	0.495437	1.78115	Differential	Complex	unstim.vs.8hr	8hr
chr1	42200000	-3.57474	0.258627	1.87832	Differential	Complex	unstim.vs.8hr	8hr
chr1	42210000	-1.66382	1.09328	1.85833	Non-Differential	Non-Differential	unstim.vs.8hr	8hr
chr1	42220000	-0.472475	1.72663	1.96016	Non-Differential	Non-Differential	unstim.vs.8hr	8hr
chr1	42360000	-0.636785	1.35366	1.65722	Non-Differential	Non-Differential	unstim.vs.8hr	8hr
chr1	42500000	-2.85394	0.406217	1.70162	Shifted	Shifted	unstim.vs.8hr	8hr
chr1	42530000	2.28499	2.28577	1.27864	Shifted	Shifted	unstim.vs.8hr	Unstim
chr1	42640000	0.32383	1.6251	1.49734	Non-Differential	Non-Differential	unstim.vs.8hr	Unstim
chr1	42660000	-0.188514	1.51262	1.61528	Non-Differential	Non-Differential	unstim.vs.8hr	8hr
chr1	42810000	0.168161	1.58953	1.53176	Non-Differential	Non-Differential	unstim.vs.8hr	Unstim
chr1	42820000	2.04991	2.02673	1.12295	Differential	Split	unstim.vs.8hr	Unstim
chr1	42960000	-0.407871	1.62542	1.82858	Non-Differential	Non-Differential	unstim.vs.8hr	8hr
chr1	43100000	1.46541	1.64482	1.00098	Non-Differential	Non-Differential	unstim.vs.8hr	Unstim
chr1	43110000	2.64006	3.25201	2.09541	Differential	Strength Change	unstim.vs.8hr	Unstim
chr1	43120000	-1.61718	4.11558	4.89429	Non-Differential	Non-Differential	unstim.vs.8hr	8hr
chr1	43370000	7.04889	2.43554	-0.724394	Differential	Complex	unstim.vs.8hr	Unstim
chr1	43380000	9.21446	3.93303	-0.189078	Differential	Complex	unstim.vs.8hr	Unstim
chr1	43390000	3.81174	2.00351	0.302647	Differential	Complex	unstim.vs.8hr	Unstim
chr1	43430000	-1.163	3.71683	4.28555	Non-Differential	Non-Differential	unstim.vs.8hr	8hr
chr1	43440000	1.20585	3.03845	2.52803	Non-Differential	Non-Differential	unstim.vs.8hr	Unstim
chr1	43450000	0.698203	1.58861	1.29111	Non-Differential	Non-Differential	unstim.vs.8hr	Unstim
chr1	43580000	-0.0778197	1.53031	1.5831	Non-Differential	Non-Differential	unstim.vs.8hr	8hr
chr1	43880000	0.593579	1.99687	1.75137	Non-Differential	Non-Differential	unstim.vs.8hr	Unstim
chr1	43890000	-0.368371	1.65756	1.84322	Non-Differential	Non-Differential	unstim.vs.8hr	8hr
chr1	44180000	-0.536664	1.58617	1.84712	Non-Differential	Non-Differential	unstim.vs.8hr	8hr
chr1	44190000	0.551402	1.5599	1.32846	Non-Differential	Non-Differential	unstim.vs.8hr	Unstim
chr1	44500000	-1.15188	1.22732	1.76238	Non-Differential	Non-Differential	unstim.vs.8hr	8hr
chr1	44510000	0.691748	2.62911	2.34649	Non-Differential	Non-Differential	unstim.vs.8hr	Unstim
chr1	44520000	0.915001	1.53	1.13377	Non-Differential	Non-Differential	unstim.vs.8hr	Unstim
chr1	44640000	0.550138	1.57188	1.34115	Non-Differential	Non-Differential	unstim.vs.8hr	Unstim
chr1	44930000	-0.936724	1.26504	1.70323	Non-Differential	Non-Differential	unstim.vs.8hr	8hr
chr1	45080000	0.64878	1.76975	1.49668	Non-Differential	Non-Differential	unstim.vs.8hr	Unstim
chr1	45240000	-3.44379	2.56513	4.15211	Differential	Strength Change	unstim.vs.8hr	8hr
chr1	45250000	-2.49749	1.63305	2.78134	Differential	Strength Change	unstim.vs.8hr	8hr
chr1	45260000	1.6457	2.31932	1.6017	Non-Differential	Non-Differential	unstim.vs.8hr	Unstim
chr1	45380000	0.176736	1.55101	1.48891	Non-Differential	Non-Differential	unstim.vs.8hr	Unstim
chr1	45480000	-1.87704	1.71829	2.58696	Non-Differential	Non-Differential	unstim.vs.8hr	8hr
chr1	45490000	0.103552	2.21399	2.19262	Non-Differential	Non-Differential	unstim.vs.8hr	Unstim
chr1	45670000	-2.9378	1.07009	2.41104	Differential	Merge	unstim.vs.8hr	8hr
chr1	45680000	1.3515	1.80359	1.2131	Non-Differential	Non-Differential	unstim.vs.8hr	Unstim
chr1	45810000	-2.31536	1.6584	2.72462	Differential	Strength Change	unstim.vs.8hr	8hr
chr1	45820000	0.299272	2.09675	1.98551	Non-Differential	Non-Differential	unstim.vs.8hr	Unstim
chr1	45830000	1.27158	2.22371	1.67419	Non-Differential	Non-Differential	unstim.vs.8hr	Unstim
chr1	45950000	1.70296	2.61941	1.87935	Non-Differential	Non-Differential	unstim.vs.8hr	Unstim
chr1	45960000	-1.26785	3.27823	3.88933	Non-Differential	Non-Differential	unstim.vs.8hr	8hr
chr1	45970000	-1.0721	1.46729	1.96903	Non-Differential	Non-Differential	unstim.vs.8hr	8hr
chr1	46150000	-1.77262	3.05343	3.89023	Non-Differential	Non-Differential	unstim.vs.8hr	8hr
chr1	46270000	-2.92519	1.20377	2.54056	Differential	Merge	unstim.vs.8hr	8hr
chr1	46280000	0.618752	1.88709	1.62895	Non-Differential	Non-Differential	unstim.vs.8hr	Unstim
chr1	46430000	-0.926722	1.09145	1.52312	Non-Differential	Non-Differential	unstim.vs.8hr	8hr
chr1	46510000	-1.62541	1.20641	1.95539	Non-Differential	Non-Differential	unstim.vs.8hr	8hr
chr1	46520000	1.08261	2.61077	2.15117	Non-Differential	Non-Differential	unstim.vs.8hr	Unstim
chr1	46530000	-0.584515	2.72045	3.01608	Non-Differential	Non-Differential	unstim.vs.8hr	8hr
chr1	46540000	1.86003	1.84068	1.02063	Non-Differential	Non-Differential	unstim.vs.8hr	Unstim
chr1	46600000	-1.75012	1.13381	1.93836	Non-Differential	Non-Differential	unstim.vs.8hr	8hr
chr1	46610000	-2.28921	1.38591	2.43716	Shifted	Shifted	unstim.vs.8hr	8hr
chr1	46620000	3.47807	3.5198	1.98728	Shifted	Shifted	unstim.vs.8hr	Unstim
chr1	46710000	-0.385975	3.77987	3.99789	Non-Differential	Non-Differential	unstim.vs.8hr	8hr
chr1	46870000	-0.484384	1.92215	2.16333	Non-Differential	Non-Differential	unstim.vs.8hr	8hr
chr1	47190000	-0.615055	2.81916	3.12974	Non-Differential	Non-Differential	unstim.vs.8hr	8hr
chr1	47200000	1.47842	3.29597	2.66524	Non-Differential	Non-Differential	unstim.vs.8hr	Unstim
chr1	47460000	-0.0695665	1.52656	1.57557	Non-Differential	Non-Differential	unstim.vs.8hr	8hr
chr1	47470000	-0.106343	1.95182	2.02236	Non-Differential	Non-Differential	unstim.vs.8hr	8hr
chr1	47480000	-0.125348	1.78935	1.86662	Non-Differential	Non-Differential	unstim.vs.8hr	8hr
chr1	47640000	0.0415844	2.04204	2.04671	Non-Differential	Non-Differential	unstim.vs.8hr	Unstim
chr1	47760000	2.03114	2.15031	1.25643	Differential	Complex	unstim.vs.8hr	Unstim
chr1	47770000	2.45786	2.24375	1.15796	Shifted	Shifted	unstim.vs.8hr	Unstim
chr1	47780000	-2.07825	0.854545	1.80428	Shifted	Shifted	unstim.vs.8hr	8hr
chr1	47920000	0.938538	1.64362	1.23805	Non-Differential	Non-Differential	unstim.vs.8hr	Unstim
chr1	48070000	0.52442	1.89918	1.68385	Non-Differential	Non-Differential	unstim.vs.8hr	Unstim
chr1	48380000	-0.760504	1.52406	1.88553	Non-Differential	Non-Differential	unstim.vs.8hr	8hr
chr1	48530000	1.02836	1.64143	1.19522	Non-Differential	Non-Differential	unstim.vs.8hr	Unstim
chr1	48700000	0.261033	1.562	1.4619	Non-Differential	Non-Differential	unstim.vs.8hr	Unstim
chr1	48710000	1.55247	1.61729	0.933769	Non-Differential	Non-Differential	unstim.vs.8hr	Unstim
chr1	48830000	0.98497	1.81171	1.38708	Non-Differential	Non-Differential	unstim.vs.8hr	Unstim
chr1	48980000	0.749031	1.70224	1.38306	Non-Differential	Non-Differential	unstim.vs.8hr	Unstim
chr1	48990000	-0.96276	1.32228	1.7729	Non-Differential	Non-Differential	unstim.vs.8hr	8hr
chr1	49130000	-0.00980858	1.52817	1.55017	Non-Differential	Non-Differential	unstim.vs.8hr	8hr
chr1	49280000	0.0373371	1.5454	1.54629	Non-Differential	Non-Differential	unstim.vs.8hr	Unstim
chr1	49290000	0.529496	1.68299	1.46287	Non-Differential	Non-Differential	unstim.vs.8hr	Unstim
chr1	49730000	0.881633	1.69615	1.31693	Non-Differential	Non-Differential	unstim.vs.8hr	Unstim
chr1	49870000	-1.60593	0.778093	1.51334	Non-Differential	Non-Differential	unstim.vs.8hr	8hr
chr1	50030000	0.567423	2.21059	1.97938	Non-Differential	Non-Differential	unstim.vs.8hr	Unstim
chr1	50180000	1.64546	1.68121	0.956362	Non-Differential	Non-Differential	unstim.vs.8hr	Unstim
chr1	50340000	-1.04902	1.96138	2.45836	Non-Differential	Non-Differential	unstim.vs.8hr	8hr
chr1	50640000	-0.182538	1.55102	1.65141	Non-Differential	Non-Differential	unstim.vs.8hr	8hr
chr1	51080000	0.11265	1.76013	1.72942	Non-Differential	Non-Differential	unstim.vs.8hr	Unstim
chr1	51230000	-0.510774	2.18955	2.44574	Non-Differential	Non-Differential	unstim.vs.8hr	8hr
chr1	51390000	-1.25753	2.09516	2.68798	Non-Differential	Non-Differential	unstim.vs.8hr	8hr
chr1	51530000	-1.20602	1.50836	2.07114	Non-Differential	Non-Differential	unstim.vs.8hr	8hr
chr1	51650000	1.11237	1.50518	1.01941	Non-Differential	Non-Differential	unstim.vs.8hr	Unstim
chr1	51670000	1.02023	1.6617	1.2194	Non-Differential	Non-Differential	unstim.vs.8hr	Unstim
chr1	51980000	-2.50296	0.65288	1.79238	Differential	Merge	unstim.vs.8hr	8hr
chr1	51990000	0.42107	1.83194	1.66257	Non-Differential	Non-Differential	unstim.vs.8hr	Unstim
chr1	52000000	1.91583	1.86317	1.01814	Non-Differential	Non-Differential	unstim.vs.8hr	Unstim
chr1	52010000	1.61354	1.51288	0.800532	Non-Differential	Non-Differential	unstim.vs.8hr	Unstim
chr1	52120000	0.624754	1.7987	1.53683	Non-Differential	Non-Differential	unstim.vs.8hr	Unstim
chr1	52270000	1.5971	1.61884	0.915149	Non-Differential	Non-Differential	unstim.vs.8hr	Unstim
chr1	52450000	-0.214445	1.86899	1.98747	Non-Differential	Non-Differential	unstim.vs.8hr	8hr
chr1	52470000	-0.291166	1.59516	1.74518	Non-Differential	Non-Differential	unstim.vs.8hr	8hr
chr1	52560000	2.01709	1.52395	0.629226	Differential	Complex	unstim.vs.8hr	Unstim
chr1	52870000	4.34002	4.4124	2.50032	Differential	Strength Change	unstim.vs.8hr	Unstim
chr1	53020000	-0.984035	2.96298	3.44209	Non-Differential	Non-Differential	unstim.vs.8hr	8hr
chr1	53150000	1.31412	1.64251	1.06707	Non-Differential	Non-Differential	unstim.vs.8hr	Unstim
chr1	53160000	0.729079	2.43021	2.12842	Non-Differential	Non-Differential	unstim.vs.8hr	Unstim
chr1	53170000	-0.791468	1.37726	1.75105	Non-Differential	Non-Differential	unstim.vs.8hr	8hr
chr1	53640000	1.54866	2.74208	2.07321	Non-Differential	Non-Differential	unstim.vs.8hr	Unstim
chr1	53650000	0.495557	1.96168	1.76011	Non-Differential	Non-Differential	unstim.vs.8hr	Unstim
chr1	53740000	0.450168	3.16082	2.99357	Non-Differential	Non-Differential	unstim.vs.8hr	Unstim
chr1	53750000	-1.28576	2.4956	3.10579	Non-Differential	Non-Differential	unstim.vs.8hr	8hr
chr1	53760000	-2.43599	0.678678	1.78818	Differential	Merge	unstim.vs.8hr	8hr
chr1	54220000	-0.9952	1.351	1.81663	Non-Differential	Non-Differential	unstim.vs.8hr	8hr
chr1	54230000	-0.318647	1.66173	1.82495	Non-Differential	Non-Differential	unstim.vs.8hr	8hr
chr1	54340000	-3.83162	0.152454	1.8871	Differential	Complex	unstim.vs.8hr	8hr
chr1	54410000	-3.6272	2.25458	3.92095	Differential	Strength Change	unstim.vs.8hr	8hr
chr1	54420000	-1.02489	3.22306	3.72364	Non-Differential	Non-Differential	unstim.vs.8hr	8hr
chr1	54430000	1.5782	3.01653	2.33745	Non-Differential	Non-Differential	unstim.vs.8hr	Unstim
chr1	54520000	0.631386	2.63999	2.3848	Non-Differential	Non-Differential	unstim.vs.8hr	Unstim
chr1	54660000	0.471825	1.7671	1.57404	Non-Differential	Non-Differential	unstim.vs.8hr	Unstim
chr1	54870000	1.2486	3.73262	3.21085	Non-Differential	Non-Differential	unstim.vs.8hr	Unstim
chr1	54960000	0.616197	3.02278	2.77886	Non-Differential	Non-Differential	unstim.vs.8hr	Unstim
chr1	54970000	1.58576	2.20504	1.51322	Non-Differential	Non-Differential	unstim.vs.8hr	Unstim
chr1	55130000	-0.132946	1.4907	1.56796	Non-Differential	Non-Differential	unstim.vs.8hr	8hr
chr1	55140000	0.0731826	1.58275	1.56786	Non-Differential	Non-Differential	unstim.vs.8hr	Unstim
chr1	55270000	-1.35872	1.46597	2.09732	Non-Differential	Non-Differential	unstim.vs.8hr	8hr
chr1	55280000	0.990913	2.25159	1.82933	Non-Differential	Non-Differential	unstim.vs.8hr	Unstim
chr1	55290000	0.540122	2.09218	1.87196	Non-Differential	Non-Differential	unstim.vs.8hr	Unstim
chr1	55410000	0.412811	1.64174	1.47392	Non-Differential	Non-Differential	unstim.vs.8hr	Unstim
chr1	55740000	-2.50584	1.04035	2.18561	Differential	Merge	unstim.vs.8hr	8hr
chr1	55750000	-0.814745	3.2005	3.60578	Non-Differential	Non-Differential	unstim.vs.8hr	8hr
chr1	55760000	1.61796	2.12275	1.41542	Non-Differential	Non-Differential	unstim.vs.8hr	Unstim
chr1	56030000	0.604641	2.08576	1.83629	Non-Differential	Non-Differential	unstim.vs.8hr	Unstim
chr1	56180000	-0.939428	1.16675	1.60504	Non-Differential	Non-Differential	unstim.vs.8hr	8hr
chr1	56190000	1.17694	1.58949	1.07549	Non-Differential	Non-Differential	unstim.vs.8hr	Unstim
chr1	56330000	0.79315	1.95913	1.62295	Non-Differential	Non-Differential	unstim.vs.8hr	Unstim
chr1	56630000	0.128136	1.59445	1.55484	Non-Differential	Non-Differential	unstim.vs.8hr	Unstim
chr1	56930000	-1.14801	1.02217	1.55313	Non-Differential	Non-Differential	unstim.vs.8hr	8hr
chr1	57240000	-0.267164	1.44733	1.5848	Non-Differential	Non-Differential	unstim.vs.8hr	8hr
chr1	57830000	-1.05382	1.35524	1.84743	Non-Differential	Non-Differential	unstim.vs.8hr	8hr
chr1	57970000	-0.622405	1.24287	1.53865	Non-Differential	Non-Differential	unstim.vs.8hr	8hr
chr1	58130000	-0.36911	1.46903	1.65285	Non-Differential	Non-Differential	unstim.vs.8hr	8hr
chr1	58580000	-1.09052	1.23355	1.74093	Non-Differential	Non-Differential	unstim.vs.8hr	8hr
chr1	58740000	0.11949	2.44974	2.42387	Non-Differential	Non-Differential	unstim.vs.8hr	Unstim
chr1	59020000	-0.27242	2.20261	2.35114	Non-Differential	Non-Differential	unstim.vs.8hr	8hr
chr1	59030000	1.97585	3.03713	2.17845	Non-Differential	Non-Differential	unstim.vs.8hr	Unstim
chr1	59040000	0.199031	2.18103	2.11609	Non-Differential	Non-Differential	unstim.vs.8hr	Unstim
chr1	59200000	-1.35128	0.96948	1.59176	Non-Differential	Non-Differential	unstim.vs.8hr	8hr
chr1	59480000	-0.00577492	1.65632	1.67798	Non-Differential	Non-Differential	unstim.vs.8hr	8hr
chr1	59490000	-0.0203102	1.97652	2.00844	Non-Differential	Non-Differential	unstim.vs.8hr	8hr
chr1	59630000	0.172328	1.78934	1.73198	Non-Differential	Non-Differential	unstim.vs.8hr	Unstim
chr1	59770000	-0.494547	1.42098	1.66099	Non-Differential	Non-Differential	unstim.vs.8hr	8hr
chr1	59780000	1.0608	1.9172	1.45949	Non-Differential	Non-Differential	unstim.vs.8hr	Unstim
chr1	59930000	-0.309973	2.32796	2.49492	Non-Differential	Non-Differential	unstim.vs.8hr	8hr
chr1	60080000	0.567968	1.54156	1.30242	Non-Differential	Non-Differential	unstim.vs.8hr	Unstim
chr1	60230000	-1.26444	1.49985	2.08896	Non-Differential	Non-Differential	unstim.vs.8hr	8hr
chr1	60240000	1.93744	1.97008	1.11651	Non-Differential	Non-Differential	unstim.vs.8hr	Unstim
chr1	60420000	1.82269	2.4551	1.65901	Non-Differential	Non-Differential	unstim.vs.8hr	Unstim
chr1	60530000	0.0818739	1.93657	1.92181	Non-Differential	Non-Differential	unstim.vs.8hr	Unstim
chr1	60980000	-0.287976	1.76227	1.91277	Non-Differential	Non-Differential	unstim.vs.8hr	8hr
chr1	61430000	-0.149959	1.92919	2.0192	Non-Differential	Non-Differential	unstim.vs.8hr	8hr
chr1	61570000	-1.63138	1.05081	1.8007	Non-Differential	Non-Differential	unstim.vs.8hr	8hr
chr1	61580000	-0.205488	2.19474	2.31291	Non-Differential	Non-Differential	unstim.vs.8hr	8hr
chr1	61730000	-1.50722	0.957103	1.64977	Non-Differential	Non-Differential	unstim.vs.8hr	8hr
chr1	62170000	0.226855	1.5844	1.50002	Non-Differential	Non-Differential	unstim.vs.8hr	Unstim
chr1	62180000	0.389949	1.92144	1.76718	Non-Differential	Non-Differential	unstim.vs.8hr	Unstim
chr1	62320000	0.243026	1.58397	1.49227	Non-Differential	Non-Differential	unstim.vs.8hr	Unstim
chr1	62330000	0.491105	1.58165	1.37773	Non-Differential	Non-Differential	unstim.vs.8hr	Unstim
chr1	62640000	0.0334712	1.56769	1.57058	Non-Differential	Non-Differential	unstim.vs.8hr	Unstim
chr1	62780000	-0.203898	1.72013	1.83213	Non-Differential	Non-Differential	unstim.vs.8hr	8hr
chr1	62790000	1.44613	1.55355	0.917388	Non-Differential	Non-Differential	unstim.vs.8hr	Unstim
chr1	62900000	-0.92112	1.34316	1.77519	Non-Differential	Non-Differential	unstim.vs.8hr	8hr
chr1	62910000	-0.116083	1.46563	1.53498	Non-Differential	Non-Differential	unstim.vs.8hr	8hr
chr1	63220000	1.85374	1.85151	1.03443	Non-Differential	Non-Differential	unstim.vs.8hr	Unstim
chr1	63230000	-0.41804	1.51003	1.71645	Non-Differential	Non-Differential	unstim.vs.8hr	8hr
chr1	63680000	-0.729843	1.41663	1.76299	Non-Differential	Non-Differential	unstim.vs.8hr	8hr
chr1	63830000	0.992158	2.07993	1.65514	Non-Differential	Non-Differential	unstim.vs.8hr	Unstim
chr1	63970000	0.209009	1.56588	1.48936	Non-Differential	Non-Differential	unstim.vs.8hr	Unstim
chr1	63980000	1.38501	2.23401	1.63332	Non-Differential	Non-Differential	unstim.vs.8hr	Unstim
chr1	63990000	-2.29835	0.65824	1.70526	Differential	Merge	unstim.vs.8hr	8hr
chr1	64290000	0.158108	1.64786	1.5953	Non-Differential	Non-Differential	unstim.vs.8hr	Unstim
chr1	64580000	0.568816	1.79605	1.55945	Non-Differential	Non-Differential	unstim.vs.8hr	Unstim
chr1	64590000	-0.317607	1.43306	1.59318	Non-Differential	Non-Differential	unstim.vs.8hr	8hr
chr1	64710000	-1.13949	1.15462	1.68325	Non-Differential	Non-Differential	unstim.vs.8hr	8hr
chr1	64740000	1.90623	2.59494	1.76267	Non-Differential	Non-Differential	unstim.vs.8hr	Unstim
chr1	65020000	0.956265	2.27588	1.86957	Non-Differential	Non-Differential	unstim.vs.8hr	Unstim
chr1	65030000	-0.489083	1.96197	2.20572	Non-Differential	Non-Differential	unstim.vs.8hr	8hr
chr1	65150000	0.350773	1.64712	1.50742	Non-Differential	Non-Differential	unstim.vs.8hr	Unstim
chr1	65160000	-1.22643	1.05478	1.62157	Non-Differential	Non-Differential	unstim.vs.8hr	8hr
chr1	65290000	-1.56002	1.50092	2.22372	Non-Differential	Non-Differential	unstim.vs.8hr	8hr
chr1	65510000	1.03006	2.12421	1.68278	Non-Differential	Non-Differential	unstim.vs.8hr	Unstim
chr1	65780000	-0.63779	1.20397	1.50626	Non-Differential	Non-Differential	unstim.vs.8hr	8hr
chr1	65920000	-0.768753	2.07291	2.44443	Non-Differential	Non-Differential	unstim.vs.8hr	8hr
chr1	65930000	1.04751	2.15506	1.70609	Non-Differential	Non-Differential	unstim.vs.8hr	Unstim
chr1	66700000	-0.181384	1.66062	1.76175	Non-Differential	Non-Differential	unstim.vs.8hr	8hr
chr1	66710000	-1.82753	2.78553	3.64408	Non-Differential	Non-Differential	unstim.vs.8hr	8hr
chr1	66800000	-1.57202	0.844431	1.5651	Non-Differential	Non-Differential	unstim.vs.8hr	8hr
chr1	66820000	3.36261	2.04752	0.550288	Differential	Complex	unstim.vs.8hr	Unstim
chr1	66830000	3.0753	1.66822	0.296559	Shifted	Shifted	unstim.vs.8hr	Unstim
chr1	66840000	-3.88375	1.63643	3.41171	Shifted	Shifted	unstim.vs.8hr	8hr
chr1	67130000	-1.48766	0.818896	1.50112	Non-Differential	Non-Differential	unstim.vs.8hr	8hr
chr1	67250000	-0.175734	2.33339	2.4397	Non-Differential	Non-Differential	unstim.vs.8hr	8hr
chr1	67600000	-1.35878	2.14518	2.78437	Non-Differential	Non-Differential	unstim.vs.8hr	8hr
chr1	67610000	2.22046	3.01321	2.04363	Differential	Strength Change	unstim.vs.8hr	Unstim
chr1	67620000	1.63501	1.95361	1.23662	Non-Differential	Non-Differential	unstim.vs.8hr	Unstim
chr1	67700000	-1.69979	1.6458	2.43347	Non-Differential	Non-Differential	unstim.vs.8hr	8hr
chr1	67890000	-1.29259	1.29258	1.89203	Non-Differential	Non-Differential	unstim.vs.8hr	8hr
chr1	67900000	-3.64206	1.7777	3.4453	Differential	Strength Change	unstim.vs.8hr	8hr
chr1	68030000	-1.04454	1.24455	1.73126	Non-Differential	Non-Differential	unstim.vs.8hr	8hr
chr1	68230000	-1.13248	1.73655	2.26869	Non-Differential	Non-Differential	unstim.vs.8hr	8hr
chr1	68470000	-1.54074	0.899122	1.60628	Non-Differential	Non-Differential	unstim.vs.8hr	8hr
chr1	68630000	-0.0506072	1.57482	1.61581	Non-Differential	Non-Differential	unstim.vs.8hr	8hr
chr1	68640000	-0.142376	1.46815	1.54943	Non-Differential	Non-Differential	unstim.vs.8hr	8hr
chr1	69080000	-0.597694	1.23868	1.52324	Non-Differential	Non-Differential	unstim.vs.8hr	8hr
chr1	69230000	1.23669	1.54618	1.00466	Non-Differential	Non-Differential	unstim.vs.8hr	Unstim
chr1	69390000	-0.932132	1.7788	2.22082	Non-Differential	Non-Differential	unstim.vs.8hr	8hr
chr1	69980000	-0.726265	1.43561	1.78057	Non-Differential	Non-Differential	unstim.vs.8hr	8hr
chr1	70120000	0.98906	1.59565	1.16668	Non-Differential	Non-Differential	unstim.vs.8hr	Unstim
chr1	70280000	-0.779953	1.31887	1.68678	Non-Differential	Non-Differential	unstim.vs.8hr	8hr
chr1	70460000	0.804273	1.63323	1.28827	Non-Differential	Non-Differential	unstim.vs.8hr	Unstim
chr1	70880000	-0.559673	1.38814	1.65722	Non-Differential	Non-Differential	unstim.vs.8hr	8hr
chr1	70890000	1.26212	2.08287	1.53601	Non-Differential	Non-Differential	unstim.vs.8hr	Unstim
chr1	70900000	1.60675	2.49333	1.79534	Non-Differential	Non-Differential	unstim.vs.8hr	Unstim
chr1	71340000	1.15811	1.94146	1.44001	Non-Differential	Non-Differential	unstim.vs.8hr	Unstim
chr1	71490000	1.15929	1.78265	1.27885	Non-Differential	Non-Differential	unstim.vs.8hr	Unstim
chr1	71780000	0.855724	1.66477	1.2969	Non-Differential	Non-Differential	unstim.vs.8hr	Unstim
chr1	71920000	-1.42648	0.968836	1.62512	Non-Differential	Non-Differential	unstim.vs.8hr	8hr
chr1	72230000	-0.177327	1.54106	1.63898	Non-Differential	Non-Differential	unstim.vs.8hr	8hr
chr1	72240000	0.394158	1.52388	1.36314	Non-Differential	Non-Differential	unstim.vs.8hr	Unstim
chr1	72360000	-0.135429	2.27431	2.36171	Non-Differential	Non-Differential	unstim.vs.8hr	8hr
chr1	72680000	0.0312995	1.58295	1.587	Non-Differential	Non-Differential	unstim.vs.8hr	Unstim
chr1	72810000	-0.702226	1.60148	1.93749	Non-Differential	Non-Differential	unstim.vs.8hr	8hr
chr1	72990000	0.305017	1.51773	1.39724	Non-Differential	Non-Differential	unstim.vs.8hr	Unstim
chr1	73280000	-0.231457	1.73103	1.85561	Non-Differential	Non-Differential	unstim.vs.8hr	8hr
chr1	73450000	0.27735	2.0685	1.96686	Non-Differential	Non-Differential	unstim.vs.8hr	Unstim
chr1	73590000	0.21717	1.56193	1.48167	Non-Differential	Non-Differential	unstim.vs.8hr	Unstim
chr1	73600000	0.796178	1.74546	1.40546	Non-Differential	Non-Differential	unstim.vs.8hr	Unstim
chr1	73730000	-0.0997268	1.46938	1.53138	Non-Differential	Non-Differential	unstim.vs.8hr	8hr
chr1	73870000	-0.626456	1.21777	1.5151	Non-Differential	Non-Differential	unstim.vs.8hr	8hr
chr1	73880000	-0.0950868	1.46171	1.52152	Non-Differential	Non-Differential	unstim.vs.8hr	8hr
chr1	74030000	-0.0633707	1.58777	1.63469	Non-Differential	Non-Differential	unstim.vs.8hr	8hr
chr1	74330000	-0.769998	1.26766	1.63048	Non-Differential	Non-Differential	unstim.vs.8hr	8hr
chr1	74630000	0.437963	1.54174	1.3614	Non-Differential	Non-Differential	unstim.vs.8hr	Unstim
chr1	74640000	0.429626	1.50417	1.32716	Non-Differential	Non-Differential	unstim.vs.8hr	Unstim
chr1	74930000	-1.06909	1.28835	1.78667	Non-Differential	Non-Differential	unstim.vs.8hr	8hr
chr1	75080000	0.312482	1.60941	1.4866	Non-Differential	Non-Differential	unstim.vs.8hr	Unstim
chr1	75240000	0.00692757	2.26363	2.28653	Non-Differential	Non-Differential	unstim.vs.8hr	Unstim
chr1	75850000	0.808212	2.18681	1.84644	Non-Differential	Non-Differential	unstim.vs.8hr	Unstim
chr1	76150000	-0.527174	1.45345	1.70858	Non-Differential	Non-Differential	unstim.vs.8hr	8hr
chr1	76290000	-0.271411	2.0664	2.21291	Non-Differential	Non-Differential	unstim.vs.8hr	8hr
chr1	76430000	0.710369	1.51138	1.20749	Non-Differential	Non-Differential	unstim.vs.8hr	Unstim
chr1	76720000	-2.30067	1.97121	3.03438	Differential	Strength Change	unstim.vs.8hr	8hr
chr1	76730000	1.63486	1.61947	0.898706	Non-Differential	Non-Differential	unstim.vs.8hr	Unstim
chr1	77020000	-0.449795	1.61938	1.84142	Non-Differential	Non-Differential	unstim.vs.8hr	8hr
chr1	77180000	-1.49418	0.947573	1.63423	Non-Differential	Non-Differential	unstim.vs.8hr	8hr
chr1	77470000	1.74799	2.40811	1.64525	Non-Differential	Non-Differential	unstim.vs.8hr	Unstim
chr1	77610000	0.239833	2.66697	2.58917	Non-Differential	Non-Differential	unstim.vs.8hr	Unstim
chr1	77780000	0.631381	2.5429	2.2866	Non-Differential	Non-Differential	unstim.vs.8hr	Unstim
chr1	77920000	-0.444817	1.58178	1.80114	Non-Differential	Non-Differential	unstim.vs.8hr	8hr
chr1	77930000	0.676224	1.80236	1.51725	Non-Differential	Non-Differential	unstim.vs.8hr	Unstim
chr1	78230000	-1.10134	1.2539	1.76641	Non-Differential	Non-Differential	unstim.vs.8hr	8hr
chr1	78390000	-0.264467	1.8368	1.97753	Non-Differential	Non-Differential	unstim.vs.8hr	8hr
chr1	78400000	1.85123	1.87888	1.06325	Non-Differential	Non-Differential	unstim.vs.8hr	Unstim
chr1	78830000	1.15226	1.89117	1.3918	Non-Differential	Non-Differential	unstim.vs.8hr	Unstim
chr1	78970000	-0.317401	1.63737	1.79974	Non-Differential	Non-Differential	unstim.vs.8hr	8hr
chr1	79140000	-1.08575	1.27725	1.78298	Non-Differential	Non-Differential	unstim.vs.8hr	8hr
chr1	79150000	0.870318	2.97557	2.61617	Non-Differential	Non-Differential	unstim.vs.8hr	Unstim
chr1	79160000	-0.222859	2.33355	2.46117	Non-Differential	Non-Differential	unstim.vs.8hr	8hr
chr1	79280000	0.456905	1.57291	1.38435	Non-Differential	Non-Differential	unstim.vs.8hr	Unstim
chr1	79570000	-0.511621	1.29676	1.54305	Non-Differential	Non-Differential	unstim.vs.8hr	8hr
chr1	79590000	-0.662027	1.28301	1.59718	Non-Differential	Non-Differential	unstim.vs.8hr	8hr
chr1	79880000	1.21357	1.86341	1.33599	Non-Differential	Non-Differential	unstim.vs.8hr	Unstim
chr1	81980000	-0.18363	1.61996	1.72164	Non-Differential	Non-Differential	unstim.vs.8hr	8hr
chr1	82130000	-0.830234	1.44634	1.83846	Non-Differential	Non-Differential	unstim.vs.8hr	8hr
chr1	82270000	1.47846	1.60936	0.959217	Non-Differential	Non-Differential	unstim.vs.8hr	Unstim
chr1	82280000	-1.01945	1.23055	1.70576	Non-Differential	Non-Differential	unstim.vs.8hr	8hr
chr1	82600000	0.424147	1.83341	1.66267	Non-Differential	Non-Differential	unstim.vs.8hr	Unstim
chr1	82720000	0.146592	3.14215	3.11198	Non-Differential	Non-Differential	unstim.vs.8hr	Unstim
chr1	82890000	1.1285	1.6403	1.14879	Non-Differential	Non-Differential	unstim.vs.8hr	Unstim
chr1	83610000	-0.489204	1.56004	1.79923	Non-Differential	Non-Differential	unstim.vs.8hr	8hr
chr1	83770000	0.0159351	1.54856	1.55916	Non-Differential	Non-Differential	unstim.vs.8hr	Unstim
chr1	83780000	-4.53795	0.0765436	2.12976	Differential	Merge	unstim.vs.8hr	8hr
chr1	83790000	1.66097	1.89888	1.16952	Non-Differential	Non-Differential	unstim.vs.8hr	Unstim
chr1	83950000	-2.06674	1.0445	1.99122	Differential	Merge	unstim.vs.8hr	8hr
chr1	83970000	0.685081	2.78085	2.503	Non-Differential	Non-Differential	unstim.vs.8hr	Unstim
chr1	83980000	2.33492	2.70496	1.68007	Differential	Strength Change	unstim.vs.8hr	Unstim
chr1	84080000	0.657	1.73753	1.46038	Non-Differential	Non-Differential	unstim.vs.8hr	Unstim
chr1	84230000	0.310956	1.5296	1.40655	Non-Differential	Non-Differential	unstim.vs.8hr	Unstim
chr1	84240000	-0.777241	1.18285	1.54797	Non-Differential	Non-Differential	unstim.vs.8hr	8hr
chr1	84370000	-0.331883	1.41359	1.57994	Non-Differential	Non-Differential	unstim.vs.8hr	8hr
chr1	84520000	-0.264892	1.83441	1.9753	Non-Differential	Non-Differential	unstim.vs.8hr	8hr
chr1	84530000	-0.106206	2.0102	2.08135	Non-Differential	Non-Differential	unstim.vs.8hr	8hr
chr1	84540000	-1.15683	1.33823	1.87681	Non-Differential	Non-Differential	unstim.vs.8hr	8hr
chr1	84680000	-1.69342	0.819436	1.59473	Non-Differential	Non-Differential	unstim.vs.8hr	8hr
chr1	84700000	-0.138474	1.82232	1.9059	Non-Differential	Non-Differential	unstim.vs.8hr	8hr
chr1	84970000	0.962691	3.46132	3.06573	Non-Differential	Non-Differential	unstim.vs.8hr	Unstim
chr1	84980000	0.802106	2.10342	1.76484	Non-Differential	Non-Differential	unstim.vs.8hr	Unstim
chr1	85090000	-2.15956	0.630668	1.6146	Differential	Merge	unstim.vs.8hr	8hr
chr1	85110000	1.45243	1.82749	1.19163	Non-Differential	Non-Differential	unstim.vs.8hr	Unstim
chr1	85120000	0.763957	1.61225	1.28528	Non-Differential	Non-Differential	unstim.vs.8hr	Unstim
chr1	85240000	-2.89543	0.745612	2.06368	Differential	Merge	unstim.vs.8hr	8hr
chr1	85250000	-0.667987	1.71669	2.03854	Non-Differential	Non-Differential	unstim.vs.8hr	8hr
chr1	85400000	0.390781	2.36521	2.21567	Non-Differential	Non-Differential	unstim.vs.8hr	Unstim
chr1	85410000	-1.87657	3.79142	4.68372	Non-Differential	Non-Differential	unstim.vs.8hr	8hr
chr1	85570000	0.783193	2.75381	2.43127	Non-Differential	Non-Differential	unstim.vs.8hr	Unstim
chr1	85580000	-0.333316	1.52987	1.6982	Non-Differential	Non-Differential	unstim.vs.8hr	8hr
chr1	85740000	-1.84545	1.14698	1.99479	Non-Differential	Non-Differential	unstim.vs.8hr	8hr
chr1	85750000	4.67972	3.14835	1.06811	Differential	Complex	unstim.vs.8hr	Unstim
chr1	86180000	-2.12182	1.13793	2.11063	Differential	Complex	unstim.vs.8hr	8hr
chr1	86190000	-1.05942	1.06728	1.55868	Non-Differential	Non-Differential	unstim.vs.8hr	8hr
chr1	86200000	2.46019	2.24585	1.15903	Differential	Split	unstim.vs.8hr	Unstim
chr1	86490000	-0.767674	1.34431	1.70696	Non-Differential	Non-Differential	unstim.vs.8hr	8hr
chr1	86630000	1.06855	2.1565	1.69803	Non-Differential	Non-Differential	unstim.vs.8hr	Unstim
chr1	86800000	-0.410349	1.45712	1.65946	Non-Differential	Non-Differential	unstim.vs.8hr	8hr
chr1	86970000	0.182177	2.74268	2.69183	Non-Differential	Non-Differential	unstim.vs.8hr	Unstim
chr1	86980000	1.31966	1.56038	0.981496	Non-Differential	Non-Differential	unstim.vs.8hr	Unstim
chr1	87070000	-0.309321	1.67735	1.83653	Non-Differential	Non-Differential	unstim.vs.8hr	8hr
chr1	87080000	-0.445538	1.37071	1.58797	Non-Differential	Non-Differential	unstim.vs.8hr	8hr
chr1	87210000	-0.828591	1.31729	1.70718	Non-Differential	Non-Differential	unstim.vs.8hr	8hr
chr1	87220000	1.28386	2.27675	1.7223	Non-Differential	Non-Differential	unstim.vs.8hr	Unstim
chr1	87380000	-0.103885	4.22174	4.31727	Non-Differential	Non-Differential	unstim.vs.8hr	8hr
chr1	87550000	-1.34902	2.16247	2.79744	Non-Differential	Non-Differential	unstim.vs.8hr	8hr
chr1	87560000	1.17711	3.0541	2.55686	Non-Differential	Non-Differential	unstim.vs.8hr	Unstim
chr1	87790000	-4.26589	0.420671	2.3548	Differential	Complex	unstim.vs.8hr	8hr
chr1	87800000	-3.76717	0.963674	2.6785	Differential	Complex	unstim.vs.8hr	8hr
chr1	87980000	-1.36412	0.901269	1.52857	Non-Differential	Non-Differential	unstim.vs.8hr	8hr
chr1	88130000	-1.01947	1.06559	1.53891	Non-Differential	Non-Differential	unstim.vs.8hr	8hr
chr1	88280000	-0.84638	1.35213	1.75046	Non-Differential	Non-Differential	unstim.vs.8hr	8hr
chr1	88420000	-0.369082	1.32788	1.51007	Non-Differential	Non-Differential	unstim.vs.8hr	8hr
chr1	88730000	1.12416	1.62263	1.13288	Non-Differential	Non-Differential	unstim.vs.8hr	Unstim
chr1	88880000	-0.370069	1.54995	1.73514	Non-Differential	Non-Differential	unstim.vs.8hr	8hr
chr1	89150000	-0.695106	1.83042	2.16584	Non-Differential	Non-Differential	unstim.vs.8hr	8hr
chr1	89160000	-1.07348	1.14134	1.63996	Non-Differential	Non-Differential	unstim.vs.8hr	8hr
chr1	89170000	-0.455388	1.31958	1.54071	Non-Differential	Non-Differential	unstim.vs.8hr	8hr
chr1	89180000	1.82758	1.73844	0.931887	Non-Differential	Non-Differential	unstim.vs.8hr	Unstim
chr1	89350000	-0.270564	2.60782	2.76018	Non-Differential	Non-Differential	unstim.vs.8hr	8hr
chr1	89360000	-0.843018	2.19779	2.60433	Non-Differential	Non-Differential	unstim.vs.8hr	8hr
chr1	89440000	0.221121	1.67293	1.59216	Non-Differential	Non-Differential	unstim.vs.8hr	Unstim
chr1	89450000	-0.246828	2.72412	2.86708	Non-Differential	Non-Differential	unstim.vs.8hr	8hr
chr1	89460000	-0.954035	1.81916	2.27155	Non-Differential	Non-Differential	unstim.vs.8hr	8hr
chr1	89660000	-6.54343	1.09703	4.06898	Differential	Complex	unstim.vs.8hr	8hr
chr1	89670000	-2.83897	1.179	2.47651	Differential	Complex	unstim.vs.8hr	8hr
chr1	89740000	-6.79678	-0.683107	2.38295	Differential	Complex	unstim.vs.8hr	8hr
chr1	89830000	-1.82064	0.917135	1.75108	Non-Differential	Non-Differential	unstim.vs.8hr	8hr
chr1	89920000	-2.73442	1.02613	2.2746	Differential	Merge	unstim.vs.8hr	8hr
chr1	89930000	-0.724304	1.55962	1.90512	Non-Differential	Non-Differential	unstim.vs.8hr	8hr
chr1	89940000	0.989232	1.654	1.22562	Non-Differential	Non-Differential	unstim.vs.8hr	Unstim
chr1	90070000	-1.44573	1.04425	1.7101	Non-Differential	Non-Differential	unstim.vs.8hr	8hr
chr1	90100000	-0.146569	3.34343	3.44817	Non-Differential	Non-Differential	unstim.vs.8hr	8hr
chr1	90230000	-0.226196	2.78165	2.91594	Non-Differential	Non-Differential	unstim.vs.8hr	8hr
chr1	90240000	-1.57804	2.04838	2.78562	Non-Differential	Non-Differential	unstim.vs.8hr	8hr
chr1	90380000	-1.21275	1.53853	2.1047	Non-Differential	Non-Differential	unstim.vs.8hr	8hr
chr1	90390000	-2.2365	0.962571	1.98512	Differential	Merge	unstim.vs.8hr	8hr
chr1	90530000	0.535998	1.60588	1.38194	Non-Differential	Non-Differential	unstim.vs.8hr	Unstim
chr1	90680000	-0.739639	1.79326	2.14839	Non-Differential	Non-Differential	unstim.vs.8hr	8hr
chr1	91280000	0.842035	1.85153	1.49201	Non-Differential	Non-Differential	unstim.vs.8hr	Unstim
chr1	91290000	0.701419	1.51639	1.21661	Non-Differential	Non-Differential	unstim.vs.8hr	Unstim
chr1	91420000	0.60043	1.65697	1.40447	Non-Differential	Non-Differential	unstim.vs.8hr	Unstim
chr1	91430000	-0.913416	1.67403	2.10638	Non-Differential	Non-Differential	unstim.vs.8hr	8hr
chr1	92020000	-1.64236	0.82956	1.58187	Non-Differential	Non-Differential	unstim.vs.8hr	8hr
chr1	92170000	0.281249	1.63317	1.52475	Non-Differential	Non-Differential	unstim.vs.8hr	Unstim
chr1	92180000	1.26966	1.68455	1.1297	Non-Differential	Non-Differential	unstim.vs.8hr	Unstim
chr1	92340000	-1.8093	0.975641	1.80513	Non-Differential	Non-Differential	unstim.vs.8hr	8hr
chr1	92350000	-1.9648	3.257	4.18306	Non-Differential	Non-Differential	unstim.vs.8hr	8hr
chr1	92460000	0.109426	1.91987	1.89245	Non-Differential	Non-Differential	unstim.vs.8hr	Unstim
chr1	92620000	0.344749	1.78953	1.65419	Non-Differential	Non-Differential	unstim.vs.8hr	Unstim
chr1	92760000	-0.267186	1.52657	1.66496	Non-Differential	Non-Differential	unstim.vs.8hr	8hr
chr1	92770000	-2.21785	1.94239	2.96777	Differential	Strength Change	unstim.vs.8hr	8hr
chr1	92920000	3.23846	1.68123	0.235932	Differential	Complex	unstim.vs.8hr	Unstim
chr1	92930000	0.379986	1.53555	1.38135	Non-Differential	Non-Differential	unstim.vs.8hr	Unstim
chr1	92940000	-2.10133	1.46748	2.4347	Differential	Complex	unstim.vs.8hr	8hr
chr1	92950000	-5.0504	0.875608	3.16977	Differential	Complex	unstim.vs.8hr	8hr
chr1	93090000	-1.0596	1.94245	2.444	Non-Differential	Non-Differential	unstim.vs.8hr	8hr
chr1	93100000	-0.85068	1.52192	1.92415	Non-Differential	Non-Differential	unstim.vs.8hr	8hr
chr1	93320000	-2.53719	0.402054	1.55415	Differential	Complex	unstim.vs.8hr	8hr
chr1	93330000	-2.57329	2.99956	4.19785	Differential	Strength Change	unstim.vs.8hr	8hr
chr1	93340000	-2.72609	0.50882	1.74757	Differential	Complex	unstim.vs.8hr	8hr
chr1	93410000	1.58218	2.24282	1.55305	Non-Differential	Non-Differential	unstim.vs.8hr	Unstim
chr1	93420000	0.00150725	4.83753	4.89247	Non-Differential	Non-Differential	unstim.vs.8hr	Unstim
chr1	93430000	-0.0527169	3.10186	3.16137	Non-Differential	Non-Differential	unstim.vs.8hr	8hr
chr1	93530000	1.02587	1.60924	1.16378	Non-Differential	Non-Differential	unstim.vs.8hr	Unstim
chr1	93540000	-1.59375	2.31213	3.05951	Non-Differential	Non-Differential	unstim.vs.8hr	8hr
chr1	93550000	-0.210538	1.88331	2.00018	Non-Differential	Non-Differential	unstim.vs.8hr	8hr
chr1	93650000	-0.518985	1.57438	1.8272	Non-Differential	Non-Differential	unstim.vs.8hr	8hr
chr1	93820000	-1.71545	0.995087	1.78236	Non-Differential	Non-Differential	unstim.vs.8hr	8hr
chr1	93830000	0.987851	2.2911	1.87068	Non-Differential	Non-Differential	unstim.vs.8hr	Unstim
chr1	93840000	0.424343	2.25845	2.0925	Non-Differential	Non-Differential	unstim.vs.8hr	Unstim
chr1	93850000	1.1415	1.67096	1.17392	Non-Differential	Non-Differential	unstim.vs.8hr	Unstim
chr1	93980000	-0.370775	1.92981	2.11969	Non-Differential	Non-Differential	unstim.vs.8hr	8hr
chr1	94300000	0.0341204	1.76365	1.7685	Non-Differential	Non-Differential	unstim.vs.8hr	Unstim
chr1	94310000	-1.67661	1.47354	2.24875	Non-Differential	Non-Differential	unstim.vs.8hr	8hr
chr1	94870000	0.458261	1.51784	1.32804	Non-Differential	Non-Differential	unstim.vs.8hr	Unstim
chr1	95030000	1.34974	1.77916	1.18918	Non-Differential	Non-Differential	unstim.vs.8hr	Unstim
chr1	95040000	-0.161962	1.54923	1.6403	Non-Differential	Non-Differential	unstim.vs.8hr	8hr
chr1	95310000	0.407514	1.66347	1.4983	Non-Differential	Non-Differential	unstim.vs.8hr	Unstim
chr1	95320000	0.0115174	2.21622	2.2365	Non-Differential	Non-Differential	unstim.vs.8hr	Unstim
chr1	95500000	1.05431	1.67999	1.22249	Non-Differential	Non-Differential	unstim.vs.8hr	Unstim
chr1	95510000	-0.434692	2.25968	2.48226	Non-Differential	Non-Differential	unstim.vs.8hr	8hr
chr1	95610000	1.2343	1.83326	1.29611	Non-Differential	Non-Differential	unstim.vs.8hr	Unstim
chr1	95620000	2.0117	2.58477	1.70468	Differential	Strength Change	unstim.vs.8hr	Unstim
chr1	95630000	-1.87096	1.08921	1.9479	Non-Differential	Non-Differential	unstim.vs.8hr	8hr
chr1	95760000	0.366866	1.65357	1.50666	Non-Differential	Non-Differential	unstim.vs.8hr	Unstim
chr1	95930000	-0.615846	1.38246	1.67688	Non-Differential	Non-Differential	unstim.vs.8hr	8hr
chr1	96380000	-1.01704	1.27288	1.74748	Non-Differential	Non-Differential	unstim.vs.8hr	8hr
chr1	96520000	0.19429	2.12262	2.05916	Non-Differential	Non-Differential	unstim.vs.8hr	Unstim
chr1	97290000	0.143897	1.78199	1.7374	Non-Differential	Non-Differential	unstim.vs.8hr	Unstim
chr1	97300000	-0.206682	1.4676	1.57795	Non-Differential	Non-Differential	unstim.vs.8hr	8hr
chr1	97420000	-0.749801	1.25562	1.60916	Non-Differential	Non-Differential	unstim.vs.8hr	8hr
chr1	97430000	0.933044	2.27767	1.88188	Non-Differential	Non-Differential	unstim.vs.8hr	Unstim
chr1	98020000	-1.40789	0.946133	1.59374	Non-Differential	Non-Differential	unstim.vs.8hr	8hr
chr1	98320000	-0.899918	1.10373	1.52341	Non-Differential	Non-Differential	unstim.vs.8hr	8hr
chr1	98510000	1.09281	2.15604	1.6866	Non-Differential	Non-Differential	unstim.vs.8hr	Unstim
chr1	98520000	-0.175082	1.48025	1.57646	Non-Differential	Non-Differential	unstim.vs.8hr	8hr
chr1	98620000	0.14678	1.58855	1.54043	Non-Differential	Non-Differential	unstim.vs.8hr	Unstim
chr1	99980000	-0.703167	1.7682	2.10655	Non-Differential	Non-Differential	unstim.vs.8hr	8hr
chr1	99990000	1.20793	1.66027	1.13306	Non-Differential	Non-Differential	unstim.vs.8hr	Unstim
chr1	100140000	0.645616	1.79544	1.5241	Non-Differential	Non-Differential	unstim.vs.8hr	Unstim
chr1	100260000	1.44317	2.06634	1.43741	Non-Differential	Non-Differential	unstim.vs.8hr	Unstim
chr1	100270000	-0.215762	1.46588	1.58032	Non-Differential	Non-Differential	unstim.vs.8hr	8hr
chr1	100420000	1.96521	1.95382	1.0875	Non-Differential	Non-Differential	unstim.vs.8hr	Unstim
chr1	100430000	-0.370861	3.00313	3.20539	Non-Differential	Non-Differential	unstim.vs.8hr	8hr
chr1	100440000	-1.77844	1.07826	1.89498	Non-Differential	Non-Differential	unstim.vs.8hr	8hr
chr1	100600000	-1.12426	2.71088	3.25051	Non-Differential	Non-Differential	unstim.vs.8hr	8hr
chr1	100610000	1.11753	1.5062	1.01811	Non-Differential	Non-Differential	unstim.vs.8hr	Unstim
chr1	100730000	0.987598	2.20215	1.78082	Non-Differential	Non-Differential	unstim.vs.8hr	Unstim
chr1	100810000	3.51519	1.51237	-0.060026	Differential	Split	unstim.vs.8hr	Unstim
chr1	100910000	0.90085	1.7634	1.37626	Non-Differential	Non-Differential	unstim.vs.8hr	Unstim
chr1	100920000	0.930838	4.36788	3.99712	Non-Differential	Non-Differential	unstim.vs.8hr	Unstim
chr1	100930000	1.74942	3.39547	2.64332	Non-Differential	Non-Differential	unstim.vs.8hr	Unstim
chr1	101340000	-0.990271	1.24893	1.71115	Non-Differential	Non-Differential	unstim.vs.8hr	8hr
chr1	101360000	0.814619	2.81982	2.48382	Non-Differential	Non-Differential	unstim.vs.8hr	Unstim
chr1	101480000	-1.49863	0.981358	1.67041	Non-Differential	Non-Differential	unstim.vs.8hr	8hr
chr1	101490000	-0.43324	2.58025	2.80585	Non-Differential	Non-Differential	unstim.vs.8hr	8hr
chr1	101500000	0.194562	1.72843	1.66032	Non-Differential	Non-Differential	unstim.vs.8hr	Unstim
chr1	101600000	0.522223	3.50324	3.30734	Non-Differential	Non-Differential	unstim.vs.8hr	Unstim
chr1	101610000	3.46697	2.35726	0.81639	Differential	Complex	unstim.vs.8hr	Unstim
chr1	101700000	4.13567	4.3979	2.57808	Differential	Strength Change	unstim.vs.8hr	Unstim
chr1	101760000	-1.66583	3.23457	4.02515	Non-Differential	Non-Differential	unstim.vs.8hr	8hr
chr1	101770000	1.5662	2.51542	1.83601	Non-Differential	Non-Differential	unstim.vs.8hr	Unstim
chr1	101920000	-0.434414	1.37623	1.58852	Non-Differential	Non-Differential	unstim.vs.8hr	8hr
chr1	102080000	-0.139993	1.5603	1.64155	Non-Differential	Non-Differential	unstim.vs.8hr	8hr
chr1	102230000	-1.14123	1.1319	1.66105	Non-Differential	Non-Differential	unstim.vs.8hr	8hr
chr1	102520000	-0.832924	1.23871	1.62966	Non-Differential	Non-Differential	unstim.vs.8hr	8hr
chr1	102530000	-0.352235	1.40026	1.57566	Non-Differential	Non-Differential	unstim.vs.8hr	8hr
chr1	102680000	-0.780893	1.20695	1.57399	Non-Differential	Non-Differential	unstim.vs.8hr	8hr
chr1	102690000	0.497355	1.62057	1.41427	Non-Differential	Non-Differential	unstim.vs.8hr	Unstim
chr1	103280000	0.896076	1.58776	1.20076	Non-Differential	Non-Differential	unstim.vs.8hr	Unstim
chr1	103600000	0.488059	1.82208	1.6223	Non-Differential	Non-Differential	unstim.vs.8hr	Unstim
chr1	103710000	-2.07573	1.05178	2.00265	Differential	Merge	unstim.vs.8hr	8hr
chr1	103730000	1.38068	1.89387	1.29122	Non-Differential	Non-Differential	unstim.vs.8hr	Unstim
chr1	104000000	2.50309	5.08908	4.01555	Shifted	Shifted	unstim.vs.8hr	Unstim
chr1	104050000	-2.27047	0.868147	1.90497	Shifted	Shifted	unstim.vs.8hr	8hr
chr1	104060000	-1.88177	1.03425	1.89719	Non-Differential	Non-Differential	unstim.vs.8hr	8hr
chr1	104120000	-5.47481	1.36734	3.85911	Differential	Merge	unstim.vs.8hr	8hr
chr1	104140000	1.73202	3.96476	3.22703	Non-Differential	Non-Differential	unstim.vs.8hr	Unstim
chr1	104150000	3.58378	3.36904	1.78698	Differential	Strength Change	unstim.vs.8hr	Unstim
chr1	104210000	-7.33979	2.04917	5.39223	Differential	Strength Change	unstim.vs.8hr	8hr
chr1	104250000	-9.83766	0.756993	5.21489	Differential	Complex	unstim.vs.8hr	8hr
chr1	104360000	0.146749	1.58267	1.5345	Non-Differential	Non-Differential	unstim.vs.8hr	Unstim
chr1	104370000	-0.615607	1.63845	1.93571	Non-Differential	Non-Differential	unstim.vs.8hr	8hr
chr1	104510000	-0.476862	1.41569	1.64763	Non-Differential	Non-Differential	unstim.vs.8hr	8hr
chr1	104660000	-0.660921	1.47096	1.78678	Non-Differential	Non-Differential	unstim.vs.8hr	8hr
chr1	104810000	-0.854411	1.34232	1.74418	Non-Differential	Non-Differential	unstim.vs.8hr	8hr
chr1	104950000	-0.262857	1.44749	1.58301	Non-Differential	Non-Differential	unstim.vs.8hr	8hr
chr1	105110000	-0.444446	1.36151	1.57817	Non-Differential	Non-Differential	unstim.vs.8hr	8hr
chr1	105260000	0.624839	1.69274	1.42961	Non-Differential	Non-Differential	unstim.vs.8hr	Unstim
chr1	105390000	0.884388	1.99507	1.61804	Non-Differential	Non-Differential	unstim.vs.8hr	Unstim
chr1	105410000	-1.7725	0.806949	1.61786	Non-Differential	Non-Differential	unstim.vs.8hr	8hr
chr1	105720000	-0.769568	1.30325	1.66628	Non-Differential	Non-Differential	unstim.vs.8hr	8hr
chr1	106170000	0.518669	1.55098	1.33424	Non-Differential	Non-Differential	unstim.vs.8hr	Unstim
chr1	106760000	0.235246	1.54121	1.45254	Non-Differential	Non-Differential	unstim.vs.8hr	Unstim
chr1	106770000	-0.210919	1.47103	1.58334	Non-Differential	Non-Differential	unstim.vs.8hr	8hr
chr1	107690000	-2.20624	0.717019	1.72306	Differential	Merge	unstim.vs.8hr	8hr
chr1	107810000	-0.248404	1.451	1.58002	Non-Differential	Non-Differential	unstim.vs.8hr	8hr
chr1	107970000	0.464361	1.60239	1.4108	Non-Differential	Non-Differential	unstim.vs.8hr	Unstim
chr1	108090000	-1.22668	0.936602	1.50215	Non-Differential	Non-Differential	unstim.vs.8hr	8hr
chr1	108420000	-2.04715	1.22907	2.16905	Differential	Merge	unstim.vs.8hr	8hr
chr1	108560000	-0.0132222	2.0498	2.07935	Non-Differential	Non-Differential	unstim.vs.8hr	8hr
chr1	108670000	-2.7697	1.35926	2.62752	Differential	Merge	unstim.vs.8hr	8hr
chr1	108680000	-0.80654	1.19495	1.57345	Non-Differential	Non-Differential	unstim.vs.8hr	8hr
chr1	108780000	8.30446	4.43121	0.726378	Shifted	Shifted	unstim.vs.8hr	Unstim
chr1	108800000	-23.9081	3.01518	13.8625	Shifted	Shifted	unstim.vs.8hr	8hr
chr1	108810000	-22.3309	0.74408	10.852	Differential	Complex	unstim.vs.8hr	8hr
chr1	108820000	-14.8155	-0.449738	6.24555	Differential	Complex	unstim.vs.8hr	8hr
chr1	108850000	-4.63905	6.97371	9.15197	Differential	Strength Change	unstim.vs.8hr	8hr
chr1	108870000	1.23385	1.53503	0.994661	Non-Differential	Non-Differential	unstim.vs.8hr	Unstim
chr1	108880000	-0.512744	5.01859	5.3082	Non-Differential	Non-Differential	unstim.vs.8hr	8hr
chr1	108890000	-0.00759724	3.97756	4.02674	Non-Differential	Non-Differential	unstim.vs.8hr	8hr
chr1	108920000	-3.58902	0.282733	1.90916	Differential	Complex	unstim.vs.8hr	8hr
chr1	109010000	3.12322	4.08612	2.7206	Differential	Strength Change	unstim.vs.8hr	Unstim
chr1	109040000	1.42284	1.59526	0.970114	Non-Differential	Non-Differential	unstim.vs.8hr	Unstim
chr1	109050000	1.02134	4.37086	3.95921	Non-Differential	Non-Differential	unstim.vs.8hr	Unstim
chr1	109060000	-2.82222	2.40979	3.71388	Differential	Strength Change	unstim.vs.8hr	8hr
chr1	109180000	2.69349	3.85907	2.68529	Differential	Strength Change	unstim.vs.8hr	Unstim
chr1	109190000	0.0217583	3.70602	3.7388	Non-Differential	Non-Differential	unstim.vs.8hr	Unstim
chr1	109290000	-1.14547	1.09362	1.62424	Non-Differential	Non-Differential	unstim.vs.8hr	8hr
chr1	109450000	1.08785	1.62832	1.15506	Non-Differential	Non-Differential	unstim.vs.8hr	Unstim
chr1	109460000	1.14489	1.64565	1.14679	Non-Differential	Non-Differential	unstim.vs.8hr	Unstim
chr1	109640000	-1.29881	1.39008	1.99347	Non-Differential	Non-Differential	unstim.vs.8hr	8hr
chr1	109650000	2.0351	2.59303	1.70246	Differential	Strength Change	unstim.vs.8hr	Unstim
chr1	109660000	3.91366	3.02448	1.28927	Differential	Complex	unstim.vs.8hr	Unstim
chr1	109760000	-1.36168	1.29296	1.92366	Non-Differential	Non-Differential	unstim.vs.8hr	8hr
chr1	109930000	-0.0450272	1.82842	1.86981	Non-Differential	Non-Differential	unstim.vs.8hr	8hr
chr1	109940000	0.0733017	2.96061	2.96151	Non-Differential	Non-Differential	unstim.vs.8hr	Unstim
chr1	110080000	1.64388	3.22361	2.51722	Non-Differential	Non-Differential	unstim.vs.8hr	Unstim
chr1	110090000	0.266261	4.7285	4.66245	Non-Differential	Non-Differential	unstim.vs.8hr	Unstim
chr1	110180000	1.17748	1.68943	1.17632	Non-Differential	Non-Differential	unstim.vs.8hr	Unstim
chr1	110320000	-1.51914	1.05054	1.74966	Non-Differential	Non-Differential	unstim.vs.8hr	8hr
chr1	110330000	-1.37583	1.10048	1.73537	Non-Differential	Non-Differential	unstim.vs.8hr	8hr
chr1	110520000	2.02417	2.41339	1.52569	Differential	Strength Change	unstim.vs.8hr	Unstim
chr1	110530000	-1.81658	2.55496	3.40591	Non-Differential	Non-Differential	unstim.vs.8hr	8hr
chr1	110660000	-0.11417	2.00506	2.07976	Non-Differential	Non-Differential	unstim.vs.8hr	8hr
chr1	110670000	-1.06092	1.38903	1.88482	Non-Differential	Non-Differential	unstim.vs.8hr	8hr
chr1	110760000	0.888429	2.9992	2.63188	Non-Differential	Non-Differential	unstim.vs.8hr	Unstim
chr1	110770000	3.00006	2.24327	0.912253	Differential	Split	unstim.vs.8hr	Unstim
chr1	110840000	0.695223	2.24075	1.9521	Non-Differential	Non-Differential	unstim.vs.8hr	Unstim
chr1	110850000	0.676332	3.60007	3.33559	Non-Differential	Non-Differential	unstim.vs.8hr	Unstim
chr1	110860000	-0.728113	1.72994	2.07913	Non-Differential	Non-Differential	unstim.vs.8hr	8hr
chr1	110950000	-1.71375	1.93855	2.73591	Non-Differential	Non-Differential	unstim.vs.8hr	8hr
chr1	110960000	0.251562	1.59034	1.49485	Non-Differential	Non-Differential	unstim.vs.8hr	Unstim
chr1	111150000	0.983698	1.70865	1.2834	Non-Differential	Non-Differential	unstim.vs.8hr	Unstim
chr1	111160000	1.92268	3.26163	2.42958	Non-Differential	Non-Differential	unstim.vs.8hr	Unstim
chr1	111310000	-2.87269	1.96477	3.28657	Differential	Strength Change	unstim.vs.8hr	8hr
chr1	111410000	2.98712	1.82014	0.490108	Shifted	Shifted	unstim.vs.8hr	Unstim
chr1	111420000	-2.1296	1.36233	2.34114	Shifted	Shifted	unstim.vs.8hr	8hr
chr1	111440000	-2.75853	0.38928	1.64133	Differential	Complex	unstim.vs.8hr	8hr
chr1	111550000	0.512626	1.57199	1.35822	Non-Differential	Non-Differential	unstim.vs.8hr	Unstim
chr1	111730000	3.2684	2.36154	0.910525	Differential	Split	unstim.vs.8hr	Unstim
chr1	111740000	1.00149	1.74189	1.30899	Non-Differential	Non-Differential	unstim.vs.8hr	Unstim
chr1	111880000	0.525949	4.0816	3.89067	Non-Differential	Non-Differential	unstim.vs.8hr	Unstim
chr1	112020000	0.999889	1.82887	1.39769	Non-Differential	Non-Differential	unstim.vs.8hr	Unstim
chr1	112160000	1.69141	2.00596	1.26407	Non-Differential	Non-Differential	unstim.vs.8hr	Unstim
chr1	112170000	1.39816	2.35378	1.74852	Non-Differential	Non-Differential	unstim.vs.8hr	Unstim
chr1	112320000	1.15228	2.77799	2.28881	Non-Differential	Non-Differential	unstim.vs.8hr	Unstim
chr1	112330000	0.586991	1.74994	1.50459	Non-Differential	Non-Differential	unstim.vs.8hr	Unstim
chr1	112620000	-0.104627	1.47115	1.53538	Non-Differential	Non-Differential	unstim.vs.8hr	8hr
chr1	112770000	1.92365	3.36986	2.53862	Non-Differential	Non-Differential	unstim.vs.8hr	Unstim
chr1	112910000	-1.21777	1.21407	1.77878	Non-Differential	Non-Differential	unstim.vs.8hr	8hr
chr1	112920000	1.29813	2.11254	1.54974	Non-Differential	Non-Differential	unstim.vs.8hr	Unstim
chr1	112930000	0.923128	1.51046	1.11033	Non-Differential	Non-Differential	unstim.vs.8hr	Unstim
chr1	113050000	-1.37178	1.43886	2.0758	Non-Differential	Non-Differential	unstim.vs.8hr	8hr
chr1	113060000	0.1634	1.5527	1.49665	Non-Differential	Non-Differential	unstim.vs.8hr	Unstim
chr1	113250000	-2.66862	1.29229	2.51407	Differential	Merge	unstim.vs.8hr	8hr
chr1	113260000	-0.112897	3.84011	3.93533	Non-Differential	Non-Differential	unstim.vs.8hr	8hr
chr1	113360000	-0.238442	1.44952	1.57403	Non-Differential	Non-Differential	unstim.vs.8hr	8hr
chr1	113500000	-1.27868	1.20904	1.80124	Non-Differential	Non-Differential	unstim.vs.8hr	8hr
chr1	113510000	-2.02537	1.32974	2.26102	Differential	Merge	unstim.vs.8hr	8hr
chr1	113520000	0.859568	1.77243	1.40406	Non-Differential	Non-Differential	unstim.vs.8hr	Unstim
chr1	113680000	0.69309	2.33433	2.04771	Non-Differential	Non-Differential	unstim.vs.8hr	Unstim
chr1	113970000	0.578346	1.86084	1.62068	Non-Differential	Non-Differential	unstim.vs.8hr	Unstim
chr1	113980000	0.143692	1.95327	1.91075	Non-Differential	Non-Differential	unstim.vs.8hr	Unstim
chr1	114120000	-1.25077	1.197	1.77644	Non-Differential	Non-Differential	unstim.vs.8hr	8hr
chr1	114370000	-1.06447	2.23689	2.74403	Non-Differential	Non-Differential	unstim.vs.8hr	8hr
chr1	114380000	-6.90422	0.179779	3.30435	Differential	Complex	unstim.vs.8hr	8hr
chr1	114440000	3.15369	1.59299	0.185014	Differential	Complex	unstim.vs.8hr	Unstim
chr1	114450000	1.03955	1.62768	1.17626	Non-Differential	Non-Differential	unstim.vs.8hr	Unstim
chr1	114710000	-0.840054	1.26883	1.66334	Non-Differential	Non-Differential	unstim.vs.8hr	8hr
chr1	114890000	2.08358	2.12073	1.2028	Differential	Complex	unstim.vs.8hr	Unstim
chr1	115050000	-2.43097	0.84566	1.95482	Differential	Complex	unstim.vs.8hr	8hr
chr1	115330000	0.608788	4.06656	3.83799	Non-Differential	Non-Differential	unstim.vs.8hr	Unstim
chr1	115480000	0.343935	1.51482	1.37669	Non-Differential	Non-Differential	unstim.vs.8hr	Unstim
chr1	115640000	-1.23996	1.21186	1.78658	Non-Differential	Non-Differential	unstim.vs.8hr	8hr
chr1	115650000	1.10154	4.07998	3.62871	Non-Differential	Non-Differential	unstim.vs.8hr	Unstim
chr1	115660000	2.589	4.45096	3.33124	Differential	Strength Change	unstim.vs.8hr	Unstim
chr1	116230000	0.636839	1.65089	1.38186	Non-Differential	Non-Differential	unstim.vs.8hr	Unstim
chr1	116370000	0.963719	1.6542	1.23737	Non-Differential	Non-Differential	unstim.vs.8hr	Unstim
chr1	116510000	-0.732456	1.32424	1.67072	Non-Differential	Non-Differential	unstim.vs.8hr	8hr
chr1	116520000	-0.112339	1.55617	1.62487	Non-Differential	Non-Differential	unstim.vs.8hr	8hr
chr1	116660000	1.07204	1.58706	1.12047	Non-Differential	Non-Differential	unstim.vs.8hr	Unstim
chr1	116670000	0.990895	2.35221	1.93111	Non-Differential	Non-Differential	unstim.vs.8hr	Unstim
chr1	116680000	0.249903	2.79256	2.71165	Non-Differential	Non-Differential	unstim.vs.8hr	Unstim
chr1	116960000	-1.52726	1.43612	2.14335	Non-Differential	Non-Differential	unstim.vs.8hr	8hr
chr1	116970000	0.501109	1.75786	1.55144	Non-Differential	Non-Differential	unstim.vs.8hr	Unstim
chr1	116980000	0.272629	2.36096	2.26481	Non-Differential	Non-Differential	unstim.vs.8hr	Unstim
chr1	117110000	-1.51906	1.15145	1.8517	Non-Differential	Non-Differential	unstim.vs.8hr	8hr
chr1	117120000	-0.931165	2.12751	2.5731	Non-Differential	Non-Differential	unstim.vs.8hr	8hr
chr1	117260000	1.20468	2.75278	2.23961	Non-Differential	Non-Differential	unstim.vs.8hr	Unstim
chr1	117270000	-0.0328661	2.73949	2.78585	Non-Differential	Non-Differential	unstim.vs.8hr	8hr
chr1	117280000	-0.833975	2.05012	2.45087	Non-Differential	Non-Differential	unstim.vs.8hr	8hr
chr1	117420000	1.92685	1.92467	1.07536	Non-Differential	Non-Differential	unstim.vs.8hr	Unstim
chr1	117600000	-1.21127	4.79673	5.3997	Non-Differential	Non-Differential	unstim.vs.8hr	8hr
chr1	117610000	2.92312	2.60767	1.31564	Differential	Split	unstim.vs.8hr	Unstim
chr1	117860000	-0.0063731	1.561	1.58184	Non-Differential	Non-Differential	unstim.vs.8hr	8hr
chr1	118050000	-0.768683	1.36477	1.7281	Non-Differential	Non-Differential	unstim.vs.8hr	8hr
chr1	118140000	5.17122	3.81026	1.51534	Differential	Strength Change	unstim.vs.8hr	Unstim
chr1	118150000	1.27283	3.80188	3.26995	Non-Differential	Non-Differential	unstim.vs.8hr	Unstim
chr1	118310000	-0.35584	2.32262	2.51026	Non-Differential	Non-Differential	unstim.vs.8hr	8hr
chr1	118320000	0.977066	1.9316	1.51192	Non-Differential	Non-Differential	unstim.vs.8hr	Unstim
chr1	118500000	1.84784	1.86282	1.04854	Non-Differential	Non-Differential	unstim.vs.8hr	Unstim
chr1	118610000	-0.389755	1.59207	1.78665	Non-Differential	Non-Differential	unstim.vs.8hr	8hr
chr1	118770000	-0.198886	1.52143	1.62887	Non-Differential	Non-Differential	unstim.vs.8hr	8hr
chr1	119060000	-0.39032	1.59537	1.79025	Non-Differential	Non-Differential	unstim.vs.8hr	8hr
chr1	119380000	0.545629	1.76389	1.5374	Non-Differential	Non-Differential	unstim.vs.8hr	Unstim
chr1	119520000	0.543128	1.94187	1.71857	Non-Differential	Non-Differential	unstim.vs.8hr	Unstim
chr1	119660000	3.88502	1.80788	0.071625	Shifted	Shifted	unstim.vs.8hr	Unstim
chr1	119680000	-2.222	1.40595	2.42704	Shifted	Shifted	unstim.vs.8hr	8hr
chr1	119820000	0.211702	1.55447	1.4766	Non-Differential	Non-Differential	unstim.vs.8hr	Unstim
chr1	120250000	-1.15653	1.14972	1.68599	Non-Differential	Non-Differential	unstim.vs.8hr	8hr
chr1	120510000	-0.911934	1.13063	1.55607	Non-Differential	Non-Differential	unstim.vs.8hr	8hr
chr1	120520000	2.2974	1.71663	0.697342	Shifted	Shifted	unstim.vs.8hr	Unstim
chr1	120530000	-3.60053	1.17758	2.8195	Shifted	Shifted	unstim.vs.8hr	8hr
chr1	120540000	6.72792	2.36013	-0.655511	Shifted	Shifted	unstim.vs.8hr	Unstim
chr1	120750000	-0.166121	10.6967	10.8948	Non-Differential	Non-Differential	unstim.vs.8hr	8hr
chr1	120840000	-5.34297	0.253799	2.67313	Differential	Merge	unstim.vs.8hr	8hr
chr1	120890000	-0.937655	2.6919	3.14692	Non-Differential	Non-Differential	unstim.vs.8hr	8hr
chr1	121080000	7.69943	10.0463	6.67964	Differential	Strength Change	unstim.vs.8hr	Unstim
chr1	121190000	0.584605	3.27153	3.04476	Non-Differential	Non-Differential	unstim.vs.8hr	Unstim
chr1	121200000	-1.28008	2.88175	3.49382	Non-Differential	Non-Differential	unstim.vs.8hr	8hr
chr1	121300000	3.77082	1.61997	-0.0667964	Differential	Split	unstim.vs.8hr	Unstim
chr1	121310000	0.157392	3.75975	3.7318	Non-Differential	Non-Differential	unstim.vs.8hr	Unstim
chr1	121320000	-4.65594	2.46422	4.59825	Differential	Strength Change	unstim.vs.8hr	8hr
chr1	121370000	-11.153	-1.04275	3.98934	Shifted	Shifted	unstim.vs.8hr	8hr
chr1	121380000	9.5741	9.39533	5.17337	Shifted	Shifted	unstim.vs.8hr	Unstim
chr1	121420000	-3.21453	5.30618	6.82101	Shifted	Shifted	unstim.vs.8hr	8hr
chr1	142530000	-0.173005	10.3064	10.5032	Non-Differential	Non-Differential	unstim.vs.8hr	8hr
chr1	142780000	-3.94417	8.1278	10.0051	Differential	Strength Change	unstim.vs.8hr	8hr
chr1	142850000	-8.85851	2.19362	6.2252	Differential	Strength Change	unstim.vs.8hr	8hr
chr1	142870000	-3.17829	1.89847	3.35771	Shifted	Shifted	unstim.vs.8hr	8hr
chr1	142890000	4.98304	2.13543	-0.0936529	Shifted	Shifted	unstim.vs.8hr	Unstim
chr1	142940000	13.0232	6.22257	0.404247	Differential	Complex	unstim.vs.8hr	Unstim
chr1	143150000	3.63741	2.43635	0.819305	Shifted	Shifted	unstim.vs.8hr	Unstim
chr1	143160000	-2.06098	2.02218	2.97753	Shifted	Shifted	unstim.vs.8hr	8hr
chr1	143170000	4.55612	2.1361	0.100103	Shifted	Shifted	unstim.vs.8hr	Unstim
chr1	143380000	0.152693	10.5466	10.5989	Non-Differential	Non-Differential	unstim.vs.8hr	Unstim
chr1	143490000	-2.14083	1.71388	2.70181	Shifted	Shifted	unstim.vs.8hr	8hr
chr1	143500000	2.43064	2.54454	1.47452	Shifted	Shifted	unstim.vs.8hr	Unstim
chr1	143750000	-28.2372	-1.0863	11.6718	Shifted	Shifted	unstim.vs.8hr	8hr
chr1	143760000	3.84589	10.4304	8.81095	Shifted	Shifted	unstim.vs.8hr	Unstim
chr1	143950000	-7.15804	-0.762537	2.466	Shifted	Shifted	unstim.vs.8hr	8hr
chr1	143990000	6.76947	5.04136	2.03777	Shifted	Shifted	unstim.vs.8hr	Unstim
chr1	144000000	0.503959	2.79488	2.5991	Non-Differential	Non-Differential	unstim.vs.8hr	Unstim
chr1	144020000	-4.39885	3.50864	5.53841	Differential	Strength Change	unstim.vs.8hr	8hr
chr1	144030000	1.54347	4.26147	3.61242	Non-Differential	Non-Differential	unstim.vs.8hr	Unstim
chr1	144810000	0.563093	11.151	11.0246	Non-Differential	Non-Differential	unstim.vs.8hr	Unstim
chr1	144900000	1.7632	1.84189	1.06564	Non-Differential	Non-Differential	unstim.vs.8hr	Unstim
chr1	144910000	-2.99135	3.422	4.81422	Differential	Strength Change	unstim.vs.8hr	8hr
chr1	144920000	0.781009	1.64973	1.31548	Non-Differential	Non-Differential	unstim.vs.8hr	Unstim
chr1	145060000	0.983824	2.39625	1.97886	Non-Differential	Non-Differential	unstim.vs.8hr	Unstim
chr1	145070000	-0.380398	1.40878	1.59702	Non-Differential	Non-Differential	unstim.vs.8hr	8hr
chr1	145130000	0.256054	1.57209	1.47436	Non-Differential	Non-Differential	unstim.vs.8hr	Unstim
chr1	145140000	-7.27213	0.524879	3.81981	Differential	Complex	unstim.vs.8hr	8hr
chr1	145200000	-3.97936	0.57002	2.37628	Differential	Complex	unstim.vs.8hr	8hr
chr1	145210000	1.92134	3.47485	2.64586	Non-Differential	Non-Differential	unstim.vs.8hr	Unstim
chr1	145220000	1.21682	2.12614	1.60027	Non-Differential	Non-Differential	unstim.vs.8hr	Unstim
chr1	145350000	11.087	4.00239	-0.965777	Shifted	Shifted	unstim.vs.8hr	Unstim
chr1	145360000	-15.2858	-0.388673	6.52004	Shifted	Shifted	unstim.vs.8hr	8hr
chr1	145370000	5.57075	2.25182	-0.241722	Shifted	Shifted	unstim.vs.8hr	Unstim
chr1	145460000	2.36507	1.63838	0.587595	Shifted	Shifted	unstim.vs.8hr	Unstim
chr1	145510000	-2.96426	1.81978	3.18132	Shifted	Shifted	unstim.vs.8hr	8hr
chr1	145520000	-1.15723	1.54015	2.08122	Non-Differential	Non-Differential	unstim.vs.8hr	8hr
chr1	145620000	0.892324	3.92167	3.5632	Non-Differential	Non-Differential	unstim.vs.8hr	Unstim
chr1	145760000	4.35337	2.61673	0.677967	Differential	Split	unstim.vs.8hr	Unstim
chr1	145780000	-1.5831	1.38832	2.12026	Non-Differential	Non-Differential	unstim.vs.8hr	8hr
chr1	146390000	-10.6864	-0.974382	3.84746	Differential	Complex	unstim.vs.8hr	8hr
chr1	146400000	-5.94833	-1.02988	1.64848	Differential	Complex	unstim.vs.8hr	8hr
chr1	146460000	-6.49606	-0.790666	2.13815	Differential	Complex	unstim.vs.8hr	8hr
chr1	146470000	-6.72741	1.53295	4.59311	Differential	Strength Change	unstim.vs.8hr	8hr
chr1	146520000	-0.794684	1.59305	1.97077	Non-Differential	Non-Differential	unstim.vs.8hr	8hr
chr1	146530000	0.0427321	2.5298	2.53957	Non-Differential	Non-Differential	unstim.vs.8hr	Unstim
chr1	146540000	2.32526	4.22584	3.22281	Differential	Strength Change	unstim.vs.8hr	Unstim
chr1	146620000	1.76232	1.77923	1.00266	Non-Differential	Non-Differential	unstim.vs.8hr	Unstim
chr1	146630000	2.14945	2.60031	1.6581	Differential	Strength Change	unstim.vs.8hr	Unstim
chr1	146640000	-1.79896	2.00615	2.84282	Non-Differential	Non-Differential	unstim.vs.8hr	8hr
chr1	146780000	-1.10466	1.76339	2.28326	Non-Differential	Non-Differential	unstim.vs.8hr	8hr
chr1	146950000	-0.532748	1.60722	1.86664	Non-Differential	Non-Differential	unstim.vs.8hr	8hr
chr1	146960000	-1.23922	1.53071	2.10876	Non-Differential	Non-Differential	unstim.vs.8hr	8hr
chr1	147100000	-0.0985546	1.76941	1.83433	Non-Differential	Non-Differential	unstim.vs.8hr	8hr
chr1	147110000	-0.817253	1.78572	2.17587	Non-Differential	Non-Differential	unstim.vs.8hr	8hr
chr1	147240000	-1.14104	1.20229	1.73217	Non-Differential	Non-Differential	unstim.vs.8hr	8hr
chr1	147350000	-0.470201	1.89275	2.12717	Non-Differential	Non-Differential	unstim.vs.8hr	8hr
chr1	147360000	-0.433889	2.94051	3.17055	Non-Differential	Non-Differential	unstim.vs.8hr	8hr
chr1	147370000	1.31026	2.31524	1.74929	Non-Differential	Non-Differential	unstim.vs.8hr	Unstim
chr1	148000000	-0.00912236	10.4304	10.5544	Non-Differential	Non-Differential	unstim.vs.8hr	8hr
chr1	148210000	10.9719	3.87666	-1.04091	Differential	Complex	unstim.vs.8hr	Unstim
chr1	148350000	2.14016	11.5709	10.7361	Differential	Strength Change	unstim.vs.8hr	Unstim
chr1	148540000	-8.44667	5.41694	9.29933	Shifted	Shifted	unstim.vs.8hr	8hr
chr1	148550000	8.12941	3.49651	-0.139899	Shifted	Shifted	unstim.vs.8hr	Unstim
chr1	148560000	3.65013	2.22581	0.600597	Differential	Complex	unstim.vs.8hr	Unstim
chr1	148570000	6.23467	1.72189	-1.07801	Differential	Complex	unstim.vs.8hr	Unstim
chr1	148590000	27.7453	14.1418	1.75634	Differential	Strength Change	unstim.vs.8hr	Unstim
chr1	148600000	3.31188	1.91555	0.439747	Differential	Complex	unstim.vs.8hr	Unstim
chr1	148670000	-24.2485	-0.155951	10.8089	Shifted	Shifted	unstim.vs.8hr	8hr
chr1	148680000	28.8717	13.5353	0.633407	Shifted	Shifted	unstim.vs.8hr	Unstim
chr1	148840000	5.67127	4.70845	2.1977	Differential	Strength Change	unstim.vs.8hr	Unstim
chr1	148860000	9.35782	5.59279	1.42493	Differential	Complex	unstim.vs.8hr	Unstim
chr1	149010000	-1.48756	9.452	10.2335	Non-Differential	Non-Differential	unstim.vs.8hr	8hr
chr1	149130000	-0.571448	1.24005	1.51275	Non-Differential	Non-Differential	unstim.vs.8hr	8hr
chr1	149270000	6.32749	5.5994	2.80212	Differential	Strength Change	unstim.vs.8hr	Unstim
chr1	149370000	14.1349	5.78087	-0.54532	Differential	Complex	unstim.vs.8hr	Unstim
chr1	149380000	2.24745	3.10843	2.12775	Shifted	Shifted	unstim.vs.8hr	Unstim
chr1	149390000	-6.39325	-0.831743	2.05011	Shifted	Shifted	unstim.vs.8hr	8hr
chr1	149400000	-7.72959	0.390273	3.89055	Shifted	Shifted	unstim.vs.8hr	8hr
chr1	149420000	19.7697	12.5367	3.73981	Shifted	Shifted	unstim.vs.8hr	Unstim
chr1	149640000	-6.28431	2.14638	5.01321	Differential	Strength Change	unstim.vs.8hr	8hr
chr1	149650000	-4.52817	-0.434395	1.60852	Differential	Complex	unstim.vs.8hr	8hr
chr1	149710000	-0.499686	9.17113	9.50258	Non-Differential	Non-Differential	unstim.vs.8hr	8hr
chr1	149860000	2.77968	6.55617	5.37442	Differential	Strength Change	unstim.vs.8hr	Unstim
chr1	149870000	-1.76378	2.94579	3.77735	Non-Differential	Non-Differential	unstim.vs.8hr	8hr
chr1	150020000	-0.23598	2.89355	3.03354	Non-Differential	Non-Differential	unstim.vs.8hr	8hr
chr1	150030000	-4.55082	1.23439	3.30674	Differential	Complex	unstim.vs.8hr	8hr
chr1	150040000	-2.12977	1.06435	2.0398	Differential	Complex	unstim.vs.8hr	8hr
chr1	150140000	-0.972173	1.35715	1.81243	Non-Differential	Non-Differential	unstim.vs.8hr	8hr
chr1	150160000	0.513654	2.45037	2.24624	Non-Differential	Non-Differential	unstim.vs.8hr	Unstim
chr1	150170000	2.31453	1.66341	0.635766	Differential	Split	unstim.vs.8hr	Unstim
chr1	150290000	0.256956	1.56606	1.46785	Non-Differential	Non-Differential	unstim.vs.8hr	Unstim
chr1	150420000	1.31301	1.71948	1.14543	Non-Differential	Non-Differential	unstim.vs.8hr	Unstim
chr1	150430000	0.575684	2.77357	2.5451	Non-Differential	Non-Differential	unstim.vs.8hr	Unstim
chr1	150520000	1.91989	1.52879	0.678083	Non-Differential	Non-Differential	unstim.vs.8hr	Unstim
chr1	150530000	3.33129	3.33781	1.86958	Differential	Strength Change	unstim.vs.8hr	Unstim
chr1	150600000	-2.38724	4.52201	5.65366	Shifted	Shifted	unstim.vs.8hr	8hr
chr1	150610000	2.63802	3.02006	1.86172	Shifted	Shifted	unstim.vs.8hr	Unstim
chr1	150730000	-1.43824	1.46787	2.13521	Non-Differential	Non-Differential	unstim.vs.8hr	8hr
chr1	150890000	-0.961458	1.07775	1.52497	Non-Differential	Non-Differential	unstim.vs.8hr	8hr
chr1	150900000	-2.38035	4.27542	5.40112	Differential	Strength Change	unstim.vs.8hr	8hr
chr1	150980000	1.74923	2.32612	1.56176	Non-Differential	Non-Differential	unstim.vs.8hr	Unstim
chr1	150990000	2.02895	2.27111	1.37961	Differential	Split	unstim.vs.8hr	Unstim
chr1	151040000	-1.85008	0.836946	1.68329	Non-Differential	Non-Differential	unstim.vs.8hr	8hr
chr1	151050000	1.13384	1.61725	1.12305	Non-Differential	Non-Differential	unstim.vs.8hr	Unstim
chr1	151140000	0.402992	1.53014	1.36548	Non-Differential	Non-Differential	unstim.vs.8hr	Unstim
chr1	151160000	-0.26053	1.43774	1.5721	Non-Differential	Non-Differential	unstim.vs.8hr	8hr
chr1	151170000	-1.70328	1.12094	1.90415	Non-Differential	Non-Differential	unstim.vs.8hr	8hr
chr1	151320000	-3.56247	2.68041	4.3224	Differential	Strength Change	unstim.vs.8hr	8hr
chr1	151330000	1.0525	2.07539	1.62325	Non-Differential	Non-Differential	unstim.vs.8hr	Unstim
chr1	151490000	-0.105617	1.97185	2.04229	Non-Differential	Non-Differential	unstim.vs.8hr	8hr
chr1	151810000	-3.06519	1.09752	2.4964	Differential	Complex	unstim.vs.8hr	8hr
chr1	151900000	-2.78195	1.15046	2.42186	Differential	Complex	unstim.vs.8hr	8hr
chr1	151910000	-0.227248	1.82315	1.94689	Non-Differential	Non-Differential	unstim.vs.8hr	8hr
chr1	152030000	2.22689	2.51521	1.537	Differential	Strength Change	unstim.vs.8hr	Unstim
chr1	152040000	2.77403	2.19912	0.969822	Differential	Complex	unstim.vs.8hr	Unstim
chr1	152050000	-1.25707	1.1682	1.75015	Non-Differential	Non-Differential	unstim.vs.8hr	8hr
chr1	152150000	2.89241	2.93255	1.65815	Differential	Strength Change	unstim.vs.8hr	Unstim
chr1	152190000	1.00674	3.76618	3.35417	Non-Differential	Non-Differential	unstim.vs.8hr	Unstim
chr1	152400000	-1.42076	1.17226	1.82829	Non-Differential	Non-Differential	unstim.vs.8hr	8hr
chr1	152520000	-0.628408	2.01894	2.32636	Non-Differential	Non-Differential	unstim.vs.8hr	8hr
chr1	152840000	0.050054	1.50494	1.49961	Non-Differential	Non-Differential	unstim.vs.8hr	Unstim
chr1	152980000	-0.371216	1.4432	1.62768	Non-Differential	Non-Differential	unstim.vs.8hr	8hr
chr1	153160000	-0.644714	1.92055	2.23421	Non-Differential	Non-Differential	unstim.vs.8hr	8hr
chr1	153290000	-1.3717	1.12928	1.76263	Non-Differential	Non-Differential	unstim.vs.8hr	8hr
chr1	153300000	0.939051	1.73024	1.32544	Non-Differential	Non-Differential	unstim.vs.8hr	Unstim
chr1	153470000	0.288478	2.6851	2.58551	Non-Differential	Non-Differential	unstim.vs.8hr	Unstim
chr1	153480000	0.439601	1.88913	1.71204	Non-Differential	Non-Differential	unstim.vs.8hr	Unstim
chr1	153600000	4.5639	3.23519	1.20832	Differential	Split	unstim.vs.8hr	Unstim
chr1	153610000	-0.816776	1.91071	2.30208	Non-Differential	Non-Differential	unstim.vs.8hr	8hr
chr1	153750000	-0.732647	1.69259	2.0434	Non-Differential	Non-Differential	unstim.vs.8hr	8hr
chr1	153760000	-0.917778	1.56393	1.99699	Non-Differential	Non-Differential	unstim.vs.8hr	8hr
chr1	153890000	1.45593	3.11597	2.49334	Non-Differential	Non-Differential	unstim.vs.8hr	Unstim
chr1	154040000	1.32528	1.8376	1.25936	Non-Differential	Non-Differential	unstim.vs.8hr	Unstim
chr1	154160000	2.09531	2.33771	1.41697	Differential	Split	unstim.vs.8hr	Unstim
chr1	154170000	1.8927	2.15517	1.32396	Non-Differential	Non-Differential	unstim.vs.8hr	Unstim
chr1	154250000	1.544	1.78132	1.10352	Non-Differential	Non-Differential	unstim.vs.8hr	Unstim
chr1	154320000	-0.827538	1.62248	2.0154	Non-Differential	Non-Differential	unstim.vs.8hr	8hr
chr1	154520000	1.44688	1.77107	1.13707	Non-Differential	Non-Differential	unstim.vs.8hr	Unstim
chr1	154530000	-1.59225	4.4919	5.26366	Non-Differential	Non-Differential	unstim.vs.8hr	8hr
chr1	154640000	-2.60139	2.0427	3.2427	Differential	Strength Change	unstim.vs.8hr	8hr
chr1	154650000	-2.05354	1.7114	2.65982	Differential	Strength Change	unstim.vs.8hr	8hr
chr1	154770000	6.38557	1.81183	-1.05528	Differential	Complex	unstim.vs.8hr	Unstim
chr1	154780000	4.70367	1.65255	-0.455731	Differential	Complex	unstim.vs.8hr	Unstim
chr1	154790000	4.23762	1.54954	-0.349155	Shifted	Shifted	unstim.vs.8hr	Unstim
chr1	154820000	-4.55002	-0.32818	1.72584	Shifted	Shifted	unstim.vs.8hr	8hr
chr1	154840000	-6.1295	-1.07176	1.68804	Differential	Complex	unstim.vs.8hr	8hr
chr1	154910000	2.32372	3.63753	2.62843	Differential	Strength Change	unstim.vs.8hr	Unstim
chr1	154920000	-0.443552	2.44884	2.6776	Non-Differential	Non-Differential	unstim.vs.8hr	8hr
chr1	154930000	-1.18393	1.6558	2.21028	Non-Differential	Non-Differential	unstim.vs.8hr	8hr
chr1	155060000	1.7161	5.80218	5.09278	Non-Differential	Non-Differential	unstim.vs.8hr	Unstim
chr1	155070000	1.7773	1.66634	0.881696	Non-Differential	Non-Differential	unstim.vs.8hr	Unstim
chr1	155150000	0.101151	1.91023	1.88645	Non-Differential	Non-Differential	unstim.vs.8hr	Unstim
chr1	155210000	0.678648	2.39131	2.11189	Non-Differential	Non-Differential	unstim.vs.8hr	Unstim
chr1	155220000	1.70248	2.94686	2.21078	Non-Differential	Non-Differential	unstim.vs.8hr	Unstim
chr1	155390000	0.312968	1.56457	1.44102	Non-Differential	Non-Differential	unstim.vs.8hr	Unstim
chr1	155560000	0.348302	1.8844	1.74855	Non-Differential	Non-Differential	unstim.vs.8hr	Unstim
chr1	155720000	-0.518317	2.9742	3.24281	Non-Differential	Non-Differential	unstim.vs.8hr	8hr
chr1	156100000	0.747941	2.36878	2.05775	Non-Differential	Non-Differential	unstim.vs.8hr	Unstim
chr1	156110000	2.09908	5.14864	4.25851	Shifted	Shifted	unstim.vs.8hr	Unstim
chr1	156120000	-2.63024	0.973758	2.17451	Shifted	Shifted	unstim.vs.8hr	8hr
chr1	156190000	-5.63222	0.534057	3.08743	Differential	Complex	unstim.vs.8hr	8hr
chr1	156310000	-2.40279	2.84931	3.96876	Differential	Strength Change	unstim.vs.8hr	8hr
chr1	156420000	0.6354	2.91112	2.65723	Non-Differential	Non-Differential	unstim.vs.8hr	Unstim
chr1	156430000	0.289119	2.98282	2.88636	Non-Differential	Non-Differential	unstim.vs.8hr	Unstim
chr1	156580000	1.04779	2.6934	2.2505	Non-Differential	Non-Differential	unstim.vs.8hr	Unstim
chr1	156590000	1.60766	3.02528	2.33299	Non-Differential	Non-Differential	unstim.vs.8hr	Unstim
chr1	156740000	-0.464533	2.93014	3.17392	Non-Differential	Non-Differential	unstim.vs.8hr	8hr
chr1	156750000	0.142453	2.4326	2.39614	Non-Differential	Non-Differential	unstim.vs.8hr	Unstim
chr1	156760000	0.202311	1.95806	1.88908	Non-Differential	Non-Differential	unstim.vs.8hr	Unstim
chr1	156900000	-1.66934	0.807793	1.57206	Non-Differential	Non-Differential	unstim.vs.8hr	8hr
chr1	157040000	0.306946	2.06629	1.95123	Non-Differential	Non-Differential	unstim.vs.8hr	Unstim
chr1	157050000	0.535676	2.26713	2.05093	Non-Differential	Non-Differential	unstim.vs.8hr	Unstim
chr1	157340000	-0.105104	1.71796	1.78525	Non-Differential	Non-Differential	unstim.vs.8hr	8hr
chr1	157790000	-0.922644	1.56545	2.00072	Non-Differential	Non-Differential	unstim.vs.8hr	8hr
chr1	157940000	-0.267831	1.91937	2.06257	Non-Differential	Non-Differential	unstim.vs.8hr	8hr
chr1	158100000	-0.419227	1.69078	1.89982	Non-Differential	Non-Differential	unstim.vs.8hr	8hr
chr1	158250000	1.64267	1.64728	0.923307	Non-Differential	Non-Differential	unstim.vs.8hr	Unstim
chr1	158400000	1.04995	1.93892	1.48636	Non-Differential	Non-Differential	unstim.vs.8hr	Unstim
chr1	158840000	0.25386	1.70012	1.60485	Non-Differential	Non-Differential	unstim.vs.8hr	Unstim
chr1	158860000	-0.204235	2.09603	2.2125	Non-Differential	Non-Differential	unstim.vs.8hr	8hr
chr1	159040000	-0.052781	1.89573	1.9414	Non-Differential	Non-Differential	unstim.vs.8hr	8hr
chr1	159300000	0.630615	1.99995	1.73775	Non-Differential	Non-Differential	unstim.vs.8hr	Unstim
chr1	159430000	0.373057	2.09761	1.95301	Non-Differential	Non-Differential	unstim.vs.8hr	Unstim
chr1	159730000	2.08409	2.05036	1.13139	Differential	Split	unstim.vs.8hr	Unstim
chr1	159740000	0.697201	2.00031	1.708	Non-Differential	Non-Differential	unstim.vs.8hr	Unstim
chr1	159750000	-1.86672	1.66804	2.53146	Non-Differential	Non-Differential	unstim.vs.8hr	8hr
chr1	159890000	-3.96047	0.680607	2.4796	Differential	Merge	unstim.vs.8hr	8hr
chr1	159900000	0.340173	2.29414	2.16667	Non-Differential	Non-Differential	unstim.vs.8hr	Unstim
chr1	159920000	3.50883	1.6602	0.092382	Differential	Split	unstim.vs.8hr	Unstim
chr1	160070000	-0.236015	3.76196	3.91196	Non-Differential	Non-Differential	unstim.vs.8hr	8hr
chr1	160160000	2.29163	3.37155	2.3739	Differential	Strength Change	unstim.vs.8hr	Unstim
chr1	160230000	-2.67429	0.649763	1.86671	Differential	Complex	unstim.vs.8hr	8hr
chr1	160400000	-4.64914	-0.07657	2.02517	Differential	Complex	unstim.vs.8hr	8hr
chr1	160490000	-3.10654	2.3912	3.82366	Differential	Strength Change	unstim.vs.8hr	8hr
chr1	160500000	0.49408	1.50914	1.30304	Non-Differential	Non-Differential	unstim.vs.8hr	Unstim
chr1	160510000	-1.88391	1.68488	2.55628	Non-Differential	Non-Differential	unstim.vs.8hr	8hr
chr1	160650000	3.13988	3.63725	2.25903	Differential	Strength Change	unstim.vs.8hr	Unstim
chr1	160800000	1.11716	3.07052	2.60059	Non-Differential	Non-Differential	unstim.vs.8hr	Unstim
chr1	160810000	2.13569	3.53147	2.60618	Differential	Strength Change	unstim.vs.8hr	Unstim
chr1	160960000	-0.851657	2.71399	3.13037	Non-Differential	Non-Differential	unstim.vs.8hr	8hr
chr1	161120000	1.26833	2.37825	1.83198	Non-Differential	Non-Differential	unstim.vs.8hr	Unstim
chr1	161200000	0.876037	1.50327	1.12436	Non-Differential	Non-Differential	unstim.vs.8hr	Unstim
chr1	161280000	1.77173	1.71432	0.932751	Non-Differential	Non-Differential	unstim.vs.8hr	Unstim
chr1	161410000	2.98694	2.51672	1.19479	Shifted	Shifted	unstim.vs.8hr	Unstim
chr1	161420000	-2.18825	4.96491	6.01167	Shifted	Shifted	unstim.vs.8hr	8hr
chr1	161490000	1.82367	1.98411	1.18215	Non-Differential	Non-Differential	unstim.vs.8hr	Unstim
chr1	161500000	-2.30486	3.32074	4.40133	Differential	Strength Change	unstim.vs.8hr	8hr
chr1	161520000	-5.61851	-0.780501	1.75156	Shifted	Shifted	unstim.vs.8hr	8hr
chr1	161530000	3.28802	1.54178	0.0724624	Shifted	Shifted	unstim.vs.8hr	Unstim
chr1	161640000	-6.02862	-0.964634	1.75078	Differential	Complex	unstim.vs.8hr	8hr
chr1	161710000	-0.0679062	2.37648	2.43452	Non-Differential	Non-Differential	unstim.vs.8hr	8hr
chr1	161720000	0.331622	4.11995	4.01734	Non-Differential	Non-Differential	unstim.vs.8hr	Unstim
chr1	161850000	1.23112	1.59975	1.06136	Non-Differential	Non-Differential	unstim.vs.8hr	Unstim
chr1	162000000	0.74188	1.63044	1.31366	Non-Differential	Non-Differential	unstim.vs.8hr	Unstim
chr1	162010000	0.421823	2.33559	2.17168	Non-Differential	Non-Differential	unstim.vs.8hr	Unstim
chr1	162020000	-1.35819	1.25966	1.8884	Non-Differential	Non-Differential	unstim.vs.8hr	8hr
chr1	162440000	0.451045	1.66722	1.4824	Non-Differential	Non-Differential	unstim.vs.8hr	Unstim
chr1	162450000	0.78143	1.74855	1.41525	Non-Differential	Non-Differential	unstim.vs.8hr	Unstim
chr1	162460000	-0.152755	1.77667	1.86619	Non-Differential	Non-Differential	unstim.vs.8hr	8hr
chr1	162760000	-0.79826	1.41828	1.79561	Non-Differential	Non-Differential	unstim.vs.8hr	8hr
chr1	163050000	0.176736	1.74759	1.68775	Non-Differential	Non-Differential	unstim.vs.8hr	Unstim
chr1	163060000	-0.639198	1.30891	1.61305	Non-Differential	Non-Differential	unstim.vs.8hr	8hr
chr1	163650000	0.607482	1.53627	1.2792	Non-Differential	Non-Differential	unstim.vs.8hr	Unstim
chr1	163800000	-0.156724	1.45642	1.54405	Non-Differential	Non-Differential	unstim.vs.8hr	8hr
chr1	163950000	0.850956	1.51744	1.15004	Non-Differential	Non-Differential	unstim.vs.8hr	Unstim
chr1	164090000	-0.943995	1.8278	2.27575	Non-Differential	Non-Differential	unstim.vs.8hr	8hr
chr1	164260000	0.57871	1.83395	1.59331	Non-Differential	Non-Differential	unstim.vs.8hr	Unstim
chr1	164410000	0.520409	1.99424	1.78182	Non-Differential	Non-Differential	unstim.vs.8hr	Unstim
chr1	164690000	1.28463	1.60241	1.03985	Non-Differential	Non-Differential	unstim.vs.8hr	Unstim
chr1	164850000	0.61618	1.64534	1.38559	Non-Differential	Non-Differential	unstim.vs.8hr	Unstim
chr1	164990000	0.337128	2.46812	2.34403	Non-Differential	Non-Differential	unstim.vs.8hr	Unstim
chr1	165320000	1.01832	1.53232	1.08939	Non-Differential	Non-Differential	unstim.vs.8hr	Unstim
chr1	165440000	0.200754	1.60413	1.53178	Non-Differential	Non-Differential	unstim.vs.8hr	Unstim
chr1	165450000	0.504212	1.99949	1.79445	Non-Differential	Non-Differential	unstim.vs.8hr	Unstim
chr1	165560000	0.631273	2.49157	2.23472	Non-Differential	Non-Differential	unstim.vs.8hr	Unstim
chr1	165570000	-1.31338	2.54978	3.17309	Non-Differential	Non-Differential	unstim.vs.8hr	8hr
chr1	165740000	-0.390776	2.34747	2.55119	Non-Differential	Non-Differential	unstim.vs.8hr	8hr
chr1	165750000	3.79033	2.83531	1.1537	Differential	Split	unstim.vs.8hr	Unstim
chr1	165890000	-0.660425	1.3857	1.70031	Non-Differential	Non-Differential	unstim.vs.8hr	8hr
chr1	165900000	0.204583	2.03358	1.96444	Non-Differential	Non-Differential	unstim.vs.8hr	Unstim
chr1	166370000	-0.766257	1.30087	1.66238	Non-Differential	Non-Differential	unstim.vs.8hr	8hr
chr1	166500000	-0.098888	1.44119	1.50249	Non-Differential	Non-Differential	unstim.vs.8hr	8hr
chr1	166790000	1.18001	1.5815	1.06602	Non-Differential	Non-Differential	unstim.vs.8hr	Unstim
chr1	166800000	0.47724	2.40031	2.21207	Non-Differential	Non-Differential	unstim.vs.8hr	Unstim
chr1	166810000	-1.32195	1.41718	2.03134	Non-Differential	Non-Differential	unstim.vs.8hr	8hr
chr1	166930000	1.40662	1.62006	1.00253	Non-Differential	Non-Differential	unstim.vs.8hr	Unstim
chr1	166940000	-2.55194	3.30745	4.49963	Differential	Strength Change	unstim.vs.8hr	8hr
chr1	166950000	-2.6274	1.4087	2.61317	Differential	Complex	unstim.vs.8hr	8hr
chr1	167010000	1.26643	2.18543	1.6378	Non-Differential	Non-Differential	unstim.vs.8hr	Unstim
chr1	167020000	0.448267	3.42128	3.25789	Non-Differential	Non-Differential	unstim.vs.8hr	Unstim
chr1	167090000	0.277829	1.54395	1.43605	Non-Differential	Non-Differential	unstim.vs.8hr	Unstim
chr1	167100000	0.0929798	3.3626	3.35922	Non-Differential	Non-Differential	unstim.vs.8hr	Unstim
chr1	167110000	1.31894	2.41883	1.85014	Non-Differential	Non-Differential	unstim.vs.8hr	Unstim
chr1	167240000	-1.78725	3.15157	3.99612	Non-Differential	Non-Differential	unstim.vs.8hr	8hr
chr1	167400000	1.4848	2.24856	1.6029	Non-Differential	Non-Differential	unstim.vs.8hr	Unstim
chr1	167410000	-1.4562	2.48375	3.17089	Non-Differential	Non-Differential	unstim.vs.8hr	8hr
chr1	167520000	-0.461479	1.3672	1.59163	Non-Differential	Non-Differential	unstim.vs.8hr	8hr
chr1	167530000	1.13047	2.0641	1.57657	Non-Differential	Non-Differential	unstim.vs.8hr	Unstim
chr1	167680000	-2.90922	2.12197	3.46209	Differential	Strength Change	unstim.vs.8hr	8hr
chr1	167690000	0.554907	2.65351	2.43306	Non-Differential	Non-Differential	unstim.vs.8hr	Unstim
chr1	168140000	1.21598	1.90376	1.37571	Non-Differential	Non-Differential	unstim.vs.8hr	Unstim
chr1	168150000	-1.99087	2.14354	3.06859	Non-Differential	Non-Differential	unstim.vs.8hr	8hr
chr1	168300000	1.51409	2.59153	1.93657	Non-Differential	Non-Differential	unstim.vs.8hr	Unstim
chr1	168310000	-2.64413	0.765636	1.97027	Differential	Complex	unstim.vs.8hr	8hr
chr1	168410000	2.59076	3.8843	2.75727	Shifted	Shifted	unstim.vs.8hr	Unstim
chr1	168440000	-2.24563	0.515723	1.53726	Shifted	Shifted	unstim.vs.8hr	8hr
chr1	168900000	-0.144297	1.74547	1.8308	Non-Differential	Non-Differential	unstim.vs.8hr	8hr
chr1	169180000	1.28556	1.58538	1.02221	Non-Differential	Non-Differential	unstim.vs.8hr	Unstim
chr1	169190000	0.000834193	1.65084	1.66944	Non-Differential	Non-Differential	unstim.vs.8hr	Unstim
chr1	169340000	-2.89177	1.70991	3.0374	Differential	Strength Change	unstim.vs.8hr	8hr
chr1	169510000	0.837502	2.25505	1.90221	Non-Differential	Non-Differential	unstim.vs.8hr	Unstim
chr1	169520000	1.72892	3.4983	2.7566	Non-Differential	Non-Differential	unstim.vs.8hr	Unstim
chr1	169680000	0.986245	5.56264	5.18057	Non-Differential	Non-Differential	unstim.vs.8hr	Unstim
chr1	169690000	1.7278	2.87183	2.12344	Non-Differential	Non-Differential	unstim.vs.8hr	Unstim
chr1	170080000	1.60708	1.88812	1.18301	Non-Differential	Non-Differential	unstim.vs.8hr	Unstim
chr1	170250000	0.145698	2.02406	1.98145	Non-Differential	Non-Differential	unstim.vs.8hr	Unstim
chr1	170390000	-1.02183	1.19054	1.66636	Non-Differential	Non-Differential	unstim.vs.8hr	8hr
chr1	170540000	0.346522	1.73823	1.6015	Non-Differential	Non-Differential	unstim.vs.8hr	Unstim
chr1	170710000	1.06351	1.62722	1.16494	Non-Differential	Non-Differential	unstim.vs.8hr	Unstim
chr1	171010000	0.337259	1.72918	1.59653	Non-Differential	Non-Differential	unstim.vs.8hr	Unstim
chr1	171280000	-4.14073	0.33075	2.20724	Differential	Merge	unstim.vs.8hr	8hr
chr1	171290000	-1.17697	1.086	1.63079	Non-Differential	Non-Differential	unstim.vs.8hr	8hr
chr1	171300000	1.21983	1.66323	1.13067	Non-Differential	Non-Differential	unstim.vs.8hr	Unstim
chr1	171310000	1.82683	1.67971	0.872822	Non-Differential	Non-Differential	unstim.vs.8hr	Unstim
chr1	171440000	2.57426	2.80642	1.67446	Differential	Strength Change	unstim.vs.8hr	Unstim
chr1	171450000	-1.02091	2.40014	2.88946	Non-Differential	Non-Differential	unstim.vs.8hr	8hr
chr1	171570000	0.90817	1.80991	1.42	Non-Differential	Non-Differential	unstim.vs.8hr	Unstim
chr1	171580000	1.39887	1.65927	1.0457	Non-Differential	Non-Differential	unstim.vs.8hr	Unstim
chr1	171750000	1.17053	3.44161	2.9518	Non-Differential	Non-Differential	unstim.vs.8hr	Unstim
chr1	171760000	-0.344234	2.30093	2.48307	Non-Differential	Non-Differential	unstim.vs.8hr	8hr
chr1	171770000	-1.56861	1.539	2.26612	Non-Differential	Non-Differential	unstim.vs.8hr	8hr
chr1	172050000	-0.324826	2.10134	2.27241	Non-Differential	Non-Differential	unstim.vs.8hr	8hr
chr1	172060000	-1.21872	1.00817	1.57094	Non-Differential	Non-Differential	unstim.vs.8hr	8hr
chr1	172200000	-0.103874	1.75513	1.82229	Non-Differential	Non-Differential	unstim.vs.8hr	8hr
chr1	172350000	1.32626	1.64728	1.06641	Non-Differential	Non-Differential	unstim.vs.8hr	Unstim
chr1	172370000	-3.37115	1.73073	3.27528	Differential	Strength Change	unstim.vs.8hr	8hr
chr1	172490000	0.0697688	1.51609	1.50197	Non-Differential	Non-Differential	unstim.vs.8hr	Unstim
chr1	172500000	0.282669	4.14382	4.06363	Non-Differential	Non-Differential	unstim.vs.8hr	Unstim
chr1	172690000	0.204371	3.84763	3.79945	Non-Differential	Non-Differential	unstim.vs.8hr	Unstim
chr1	172700000	-0.0925001	2.94756	3.02328	Non-Differential	Non-Differential	unstim.vs.8hr	8hr
chr1	172790000	-3.38366	1.19001	2.73399	Differential	Complex	unstim.vs.8hr	8hr
chr1	172800000	-3.0295	1.4033	2.78956	Differential	Complex	unstim.vs.8hr	8hr
chr1	172940000	-1.99241	0.763604	1.67347	Non-Differential	Non-Differential	unstim.vs.8hr	8hr
chr1	172950000	4.24882	2.09889	0.201457	Differential	Split	unstim.vs.8hr	Unstim
chr1	172960000	-1.48565	1.39614	2.0841	Non-Differential	Non-Differential	unstim.vs.8hr	8hr
chr1	173110000	-1.51953	0.864646	1.56181	Non-Differential	Non-Differential	unstim.vs.8hr	8hr
chr1	173380000	0.411603	1.68099	1.51417	Non-Differential	Non-Differential	unstim.vs.8hr	Unstim
chr1	173390000	0.645359	3.10118	2.84497	Non-Differential	Non-Differential	unstim.vs.8hr	Unstim
chr1	173400000	-0.960345	1.06168	1.50821	Non-Differential	Non-Differential	unstim.vs.8hr	8hr
chr1	173680000	0.815577	1.90162	1.55464	Non-Differential	Non-Differential	unstim.vs.8hr	Unstim
chr1	173840000	-2.73578	2.88923	4.15973	Differential	Strength Change	unstim.vs.8hr	8hr
chr1	173850000	0.156262	1.60096	1.5487	Non-Differential	Non-Differential	unstim.vs.8hr	Unstim
chr1	173990000	-1.13	1.60971	2.13928	Non-Differential	Non-Differential	unstim.vs.8hr	8hr
chr1	174000000	0.0673892	1.86967	1.8607	Non-Differential	Non-Differential	unstim.vs.8hr	Unstim
chr1	174130000	-0.954499	2.10071	2.55655	Non-Differential	Non-Differential	unstim.vs.8hr	8hr
chr1	174290000	0.994645	1.93334	1.50573	Non-Differential	Non-Differential	unstim.vs.8hr	Unstim
chr1	174450000	-1.1298	1.01857	1.54125	Non-Differential	Non-Differential	unstim.vs.8hr	8hr
chr1	174600000	0.337081	1.84302	1.71177	Non-Differential	Non-Differential	unstim.vs.8hr	Unstim
chr1	174720000	0.884867	1.73594	1.35571	Non-Differential	Non-Differential	unstim.vs.8hr	Unstim
chr1	174730000	0.931581	2.14276	1.74608	Non-Differential	Non-Differential	unstim.vs.8hr	Unstim
chr1	174740000	-0.295804	1.79748	1.95193	Non-Differential	Non-Differential	unstim.vs.8hr	8hr
chr1	174900000	0.620949	1.84281	1.58317	Non-Differential	Non-Differential	unstim.vs.8hr	Unstim
chr1	174910000	-0.285364	1.80973	1.9596	Non-Differential	Non-Differential	unstim.vs.8hr	8hr
chr1	175000000	0.52185	4.90114	4.72148	Non-Differential	Non-Differential	unstim.vs.8hr	Unstim
chr1	175010000	0.870261	1.70323	1.32923	Non-Differential	Non-Differential	unstim.vs.8hr	Unstim
chr1	175180000	4.40858	3.93761	1.98906	Differential	Strength Change	unstim.vs.8hr	Unstim
chr1	175190000	0.90872	2.6041	2.22307	Non-Differential	Non-Differential	unstim.vs.8hr	Unstim
chr1	175200000	-1.68026	1.49368	2.27077	Non-Differential	Non-Differential	unstim.vs.8hr	8hr
chr1	175210000	-2.1533	0.554109	1.53434	Shifted	Shifted	unstim.vs.8hr	8hr
chr1	175260000	2.36272	1.59172	0.541457	Shifted	Shifted	unstim.vs.8hr	Unstim
chr1	175340000	0.00946366	1.49666	1.50959	Non-Differential	Non-Differential	unstim.vs.8hr	Unstim
chr1	175660000	-1.56186	0.966477	1.68396	Non-Differential	Non-Differential	unstim.vs.8hr	8hr
chr1	176230000	0.503876	2.40311	2.20286	Non-Differential	Non-Differential	unstim.vs.8hr	Unstim
chr1	176540000	-0.619807	1.34215	1.6379	Non-Differential	Non-Differential	unstim.vs.8hr	8hr
chr1	176690000	0.538613	1.56224	1.33661	Non-Differential	Non-Differential	unstim.vs.8hr	Unstim
chr1	176850000	0.862142	1.71421	1.344	Non-Differential	Non-Differential	unstim.vs.8hr	Unstim
chr1	177000000	0.261782	1.50771	1.40666	Non-Differential	Non-Differential	unstim.vs.8hr	Unstim
chr1	177290000	0.441839	1.77054	1.59107	Non-Differential	Non-Differential	unstim.vs.8hr	Unstim
chr1	177460000	0.252247	1.73833	1.64424	Non-Differential	Non-Differential	unstim.vs.8hr	Unstim
chr1	177610000	0.819943	2.02882	1.68133	Non-Differential	Non-Differential	unstim.vs.8hr	Unstim
chr1	177730000	1.89154	1.5957	0.758584	Non-Differential	Non-Differential	unstim.vs.8hr	Unstim
chr1	177900000	0.368924	1.77185	1.62538	Non-Differential	Non-Differential	unstim.vs.8hr	Unstim
chr1	178060000	-0.834566	1.37931	1.77261	Non-Differential	Non-Differential	unstim.vs.8hr	8hr
chr1	178350000	-0.0933378	1.53699	1.59687	Non-Differential	Non-Differential	unstim.vs.8hr	8hr
chr1	178360000	-0.562275	1.26971	1.53861	Non-Differential	Non-Differential	unstim.vs.8hr	8hr
chr1	178960000	1.02934	3.07902	2.6489	Non-Differential	Non-Differential	unstim.vs.8hr	Unstim
chr1	178970000	-0.139727	1.64905	1.7312	Non-Differential	Non-Differential	unstim.vs.8hr	8hr
chr1	179090000	-1.42512	1.964	2.63111	Non-Differential	Non-Differential	unstim.vs.8hr	8hr
chr1	179100000	-0.671253	1.45242	1.7727	Non-Differential	Non-Differential	unstim.vs.8hr	8hr
chr1	179250000	-0.9062	1.30555	1.7304	Non-Differential	Non-Differential	unstim.vs.8hr	8hr
chr1	179260000	-0.773388	2.32328	2.69977	Non-Differential	Non-Differential	unstim.vs.8hr	8hr
chr1	179270000	-0.406389	1.44949	1.64996	Non-Differential	Non-Differential	unstim.vs.8hr	8hr
chr1	179660000	3.00229	2.74703	1.4208	Differential	Split	unstim.vs.8hr	Unstim
chr1	179670000	1.06149	3.49802	3.05817	Non-Differential	Non-Differential	unstim.vs.8hr	Unstim
chr1	179850000	1.36445	3.03167	2.44945	Non-Differential	Non-Differential	unstim.vs.8hr	Unstim
chr1	179980000	1.01665	1.81476	1.37583	Non-Differential	Non-Differential	unstim.vs.8hr	Unstim
chr1	180150000	0.137808	2.06283	2.02423	Non-Differential	Non-Differential	unstim.vs.8hr	Unstim
chr1	180160000	1.04362	2.34539	1.90037	Non-Differential	Non-Differential	unstim.vs.8hr	Unstim
chr1	180270000	-0.496423	1.56097	1.80343	Non-Differential	Non-Differential	unstim.vs.8hr	8hr
chr1	180470000	-3.00178	1.03643	2.40594	Differential	Merge	unstim.vs.8hr	8hr
chr1	180600000	0.0802532	3.19158	3.19199	Non-Differential	Non-Differential	unstim.vs.8hr	Unstim
chr1	180750000	0.328596	1.56069	1.43003	Non-Differential	Non-Differential	unstim.vs.8hr	Unstim
chr1	180900000	1.58377	1.55679	0.85841	Non-Differential	Non-Differential	unstim.vs.8hr	Unstim
chr1	180910000	-0.128954	2.06605	2.14813	Non-Differential	Non-Differential	unstim.vs.8hr	8hr
chr1	180920000	-1.40854	1.13993	1.79007	Non-Differential	Non-Differential	unstim.vs.8hr	8hr
chr1	181040000	1.16024	1.57287	1.06622	Non-Differential	Non-Differential	unstim.vs.8hr	Unstim
chr1	181050000	-2.80244	2.76598	4.06522	Differential	Strength Change	unstim.vs.8hr	8hr
chr1	181060000	-3.17122	0.433551	1.87275	Differential	Complex	unstim.vs.8hr	8hr
chr1	181110000	-4.52931	0.518498	2.57289	Differential	Complex	unstim.vs.8hr	8hr
chr1	181150000	0.590361	1.92959	1.68478	Non-Differential	Non-Differential	unstim.vs.8hr	Unstim
chr1	181160000	1.18674	3.51705	3.02078	Non-Differential	Non-Differential	unstim.vs.8hr	Unstim
chr1	181170000	-1.7898	1.19113	2.01429	Non-Differential	Non-Differential	unstim.vs.8hr	8hr
chr1	181390000	1.28881	3.04601	2.49816	Non-Differential	Non-Differential	unstim.vs.8hr	Unstim
chr1	181400000	4.70138	4.44128	2.3661	Differential	Strength Change	unstim.vs.8hr	Unstim
chr1	181500000	-0.386117	1.35285	1.54303	Non-Differential	Non-Differential	unstim.vs.8hr	8hr
chr1	181660000	-0.109292	1.5052	1.57194	Non-Differential	Non-Differential	unstim.vs.8hr	8hr
chr1	181790000	-0.3178	1.34954	1.50879	Non-Differential	Non-Differential	unstim.vs.8hr	8hr
chr1	181800000	-0.657843	1.68806	2.00499	Non-Differential	Non-Differential	unstim.vs.8hr	8hr
chr1	182120000	2.11378	1.60745	0.66995	Differential	Split	unstim.vs.8hr	Unstim
chr1	182250000	-0.893969	1.18065	1.59853	Non-Differential	Non-Differential	unstim.vs.8hr	8hr
chr1	182540000	2.67736	1.81559	0.625605	Differential	Split	unstim.vs.8hr	Unstim
chr1	182550000	0.149995	2.56257	2.5242	Non-Differential	Non-Differential	unstim.vs.8hr	Unstim
chr1	182560000	-2.29564	1.40553	2.45992	Differential	Complex	unstim.vs.8hr	8hr
chr1	182740000	2.641	1.53469	0.357912	Differential	Complex	unstim.vs.8hr	Unstim
chr1	182750000	-1.19363	2.10907	2.67315	Non-Differential	Non-Differential	unstim.vs.8hr	8hr
chr1	182760000	-2.73219	0.482807	1.72402	Differential	Merge	unstim.vs.8hr	8hr
chr1	182860000	-0.37918	2.02087	2.21559	Non-Differential	Non-Differential	unstim.vs.8hr	8hr
chr1	182870000	1.76201	2.34372	1.57378	Non-Differential	Non-Differential	unstim.vs.8hr	Unstim
chr1	183010000	-0.544789	1.24145	1.50212	Non-Differential	Non-Differential	unstim.vs.8hr	8hr
chr1	183130000	1.85557	1.646	0.825723	Non-Differential	Non-Differential	unstim.vs.8hr	Unstim
chr1	183140000	1.89057	1.59162	0.754891	Non-Differential	Non-Differential	unstim.vs.8hr	Unstim
chr1	183420000	1.66278	2.39516	1.67069	Non-Differential	Non-Differential	unstim.vs.8hr	Unstim
chr1	183430000	1.66831	3.25207	2.53496	Non-Differential	Non-Differential	unstim.vs.8hr	Unstim
chr1	183440000	-3.21266	2.20864	3.687	Differential	Strength Change	unstim.vs.8hr	8hr
chr1	183590000	-0.0404873	2.11273	2.15533	Non-Differential	Non-Differential	unstim.vs.8hr	8hr
chr1	183600000	-0.987515	2.02331	2.49319	Non-Differential	Non-Differential	unstim.vs.8hr	8hr
chr1	183760000	0.771386	1.79687	1.46867	Non-Differential	Non-Differential	unstim.vs.8hr	Unstim
chr1	183880000	-2.20181	0.726915	1.73107	Differential	Merge	unstim.vs.8hr	8hr
chr1	183890000	-0.00985143	1.84199	1.86762	Non-Differential	Non-Differential	unstim.vs.8hr	8hr
chr1	184040000	-0.171201	1.5299	1.62492	Non-Differential	Non-Differential	unstim.vs.8hr	8hr
chr1	184200000	0.55284	2.10604	1.88023	Non-Differential	Non-Differential	unstim.vs.8hr	Unstim
chr1	184650000	0.190239	1.71797	1.65169	Non-Differential	Non-Differential	unstim.vs.8hr	Unstim
chr1	184660000	1.20286	1.9503	1.42872	Non-Differential	Non-Differential	unstim.vs.8hr	Unstim
chr1	184780000	0.356284	2.08123	1.94403	Non-Differential	Non-Differential	unstim.vs.8hr	Unstim
chr1	184950000	-2.13104	1.14675	2.12373	Differential	Merge	unstim.vs.8hr	8hr
chr1	185120000	-0.0169604	1.98752	2.01804	Non-Differential	Non-Differential	unstim.vs.8hr	8hr
chr1	185280000	2.33805	3.11363	2.09203	Differential	Strength Change	unstim.vs.8hr	Unstim
chr1	185290000	5.46875	4.10554	1.67945	Differential	Strength Change	unstim.vs.8hr	Unstim
chr1	185400000	-1.27732	1.25221	1.84429	Non-Differential	Non-Differential	unstim.vs.8hr	8hr
chr1	185410000	-0.98024	1.15235	1.60893	Non-Differential	Non-Differential	unstim.vs.8hr	8hr
chr1	185550000	1.65873	2.11374	1.38787	Non-Differential	Non-Differential	unstim.vs.8hr	Unstim
chr1	185560000	-1.44797	1.1731	1.84144	Non-Differential	Non-Differential	unstim.vs.8hr	8hr
chr1	185680000	0.8812	2.30659	1.93458	Non-Differential	Non-Differential	unstim.vs.8hr	Unstim
chr1	185860000	-0.469953	2.28774	2.52659	Non-Differential	Non-Differential	unstim.vs.8hr	8hr
chr1	186000000	0.375807	1.50895	1.35634	Non-Differential	Non-Differential	unstim.vs.8hr	Unstim
chr1	186300000	1.70762	3.5904	2.85939	Non-Differential	Non-Differential	unstim.vs.8hr	Unstim
chr1	186610000	0.356965	1.98366	1.84503	Non-Differential	Non-Differential	unstim.vs.8hr	Unstim
chr1	186750000	-0.417277	1.29709	1.50073	Non-Differential	Non-Differential	unstim.vs.8hr	8hr
chr1	186760000	-0.354931	1.38092	1.55732	Non-Differential	Non-Differential	unstim.vs.8hr	8hr
chr1	186890000	0.370496	1.63857	1.48985	Non-Differential	Non-Differential	unstim.vs.8hr	Unstim
chr1	187190000	-0.373755	1.36853	1.5533	Non-Differential	Non-Differential	unstim.vs.8hr	8hr
chr1	187200000	1.08037	1.64946	1.17981	Non-Differential	Non-Differential	unstim.vs.8hr	Unstim
chr1	187510000	-0.186841	1.48312	1.58468	Non-Differential	Non-Differential	unstim.vs.8hr	8hr
chr1	187640000	0.297105	1.66457	1.54934	Non-Differential	Non-Differential	unstim.vs.8hr	Unstim
chr1	187800000	0.696912	1.70918	1.41364	Non-Differential	Non-Differential	unstim.vs.8hr	Unstim
chr1	187940000	0.436117	1.63061	1.45212	Non-Differential	Non-Differential	unstim.vs.8hr	Unstim
chr1	188400000	-0.535033	1.74391	2.00593	Non-Differential	Non-Differential	unstim.vs.8hr	8hr
chr1	188560000	0.474211	1.65699	1.46158	Non-Differential	Non-Differential	unstim.vs.8hr	Unstim
chr1	189150000	-0.136632	1.45701	1.53556	Non-Differential	Non-Differential	unstim.vs.8hr	8hr
chr1	189300000	0.813759	2.05421	1.7098	Non-Differential	Non-Differential	unstim.vs.8hr	Unstim
chr1	189440000	-0.486421	2.32855	2.57531	Non-Differential	Non-Differential	unstim.vs.8hr	8hr
chr1	189730000	0.0269302	1.53987	1.5454	Non-Differential	Non-Differential	unstim.vs.8hr	Unstim
chr1	190200000	0.749519	1.60863	1.28815	Non-Differential	Non-Differential	unstim.vs.8hr	Unstim
chr1	190340000	1.3737	1.61803	1.01537	Non-Differential	Non-Differential	unstim.vs.8hr	Unstim
chr1	190350000	-0.995477	1.15189	1.61535	Non-Differential	Non-Differential	unstim.vs.8hr	8hr
chr1	190500000	-0.69436	1.39871	1.72882	Non-Differential	Non-Differential	unstim.vs.8hr	8hr
chr1	190650000	-0.0135823	1.55794	1.58199	Non-Differential	Non-Differential	unstim.vs.8hr	8hr
chr1	190800000	-0.967518	1.40122	1.85491	Non-Differential	Non-Differential	unstim.vs.8hr	8hr
chr1	191100000	-1.05174	1.27332	1.76362	Non-Differential	Non-Differential	unstim.vs.8hr	8hr
chr1	191110000	0.0760651	1.54827	1.53167	Non-Differential	Non-Differential	unstim.vs.8hr	Unstim
chr1	191250000	0.273756	1.61995	1.51477	Non-Differential	Non-Differential	unstim.vs.8hr	Unstim
chr1	191400000	-0.657987	1.49186	1.8066	Non-Differential	Non-Differential	unstim.vs.8hr	8hr
chr1	191410000	0.775717	1.5567	1.22377	Non-Differential	Non-Differential	unstim.vs.8hr	Unstim
chr1	191840000	0.115861	1.5944	1.56033	Non-Differential	Non-Differential	unstim.vs.8hr	Unstim
chr1	192150000	-0.66509	1.34671	1.66299	Non-Differential	Non-Differential	unstim.vs.8hr	8hr
chr1	192440000	1.42906	3.05451	2.44333	Non-Differential	Non-Differential	unstim.vs.8hr	Unstim
chr1	192450000	-1.451	1.56443	2.23865	Non-Differential	Non-Differential	unstim.vs.8hr	8hr
chr1	192580000	-0.204928	2.26474	2.38346	Non-Differential	Non-Differential	unstim.vs.8hr	8hr
chr1	192590000	1.47925	2.24113	1.59789	Non-Differential	Non-Differential	unstim.vs.8hr	Unstim
chr1	192750000	-0.508568	1.71708	1.96683	Non-Differential	Non-Differential	unstim.vs.8hr	8hr
chr1	192760000	0.625963	1.76318	1.50036	Non-Differential	Non-Differential	unstim.vs.8hr	Unstim
chr1	193020000	1.0266	2.18852	1.74939	Non-Differential	Non-Differential	unstim.vs.8hr	Unstim
chr1	193030000	-1.46016	2.11288	2.79755	Non-Differential	Non-Differential	unstim.vs.8hr	8hr
chr1	193370000	-2.32019	1.14575	2.20826	Differential	Complex	unstim.vs.8hr	8hr
chr1	193380000	-2.20684	0.728245	1.73469	Differential	Complex	unstim.vs.8hr	8hr
chr1	193510000	-2.88324	1.80839	3.13317	Differential	Strength Change	unstim.vs.8hr	8hr
chr1	193800000	0.21045	1.64737	1.57113	Non-Differential	Non-Differential	unstim.vs.8hr	Unstim
chr1	193950000	0.291794	1.85034	1.73965	Non-Differential	Non-Differential	unstim.vs.8hr	Unstim
chr1	194260000	-0.823548	2.03309	2.42893	Non-Differential	Non-Differential	unstim.vs.8hr	8hr
chr1	194270000	-0.527094	2.06466	2.32678	Non-Differential	Non-Differential	unstim.vs.8hr	8hr
chr1	194400000	-0.489251	1.66366	1.90406	Non-Differential	Non-Differential	unstim.vs.8hr	8hr
chr1	195300000	0.0335161	1.54118	1.54374	Non-Differential	Non-Differential	unstim.vs.8hr	Unstim
chr1	195450000	-0.244325	1.54243	1.67066	Non-Differential	Non-Differential	unstim.vs.8hr	8hr
chr1	195900000	0.174006	1.75039	1.69182	Non-Differential	Non-Differential	unstim.vs.8hr	Unstim
chr1	196050000	-0.426438	1.34694	1.55529	Non-Differential	Non-Differential	unstim.vs.8hr	8hr
chr1	196190000	-0.0610017	2.39728	2.45244	Non-Differential	Non-Differential	unstim.vs.8hr	8hr
chr1	196340000	-0.860995	1.18829	1.59135	Non-Differential	Non-Differential	unstim.vs.8hr	8hr
chr1	196660000	1.12313	2.14465	1.66136	Non-Differential	Non-Differential	unstim.vs.8hr	Unstim
chr1	196810000	-4.23934	0.615062	2.53942	Shifted	Shifted	unstim.vs.8hr	8hr
chr1	196820000	2.88992	2.61095	1.33397	Shifted	Shifted	unstim.vs.8hr	Unstim
chr1	196950000	-0.988737	1.26192	1.7236	Non-Differential	Non-Differential	unstim.vs.8hr	8hr
chr1	196960000	0.970738	1.7173	1.29802	Non-Differential	Non-Differential	unstim.vs.8hr	Unstim
chr1	197100000	0.366049	1.83994	1.69555	Non-Differential	Non-Differential	unstim.vs.8hr	Unstim
chr1	197250000	-0.259221	1.77778	1.91546	Non-Differential	Non-Differential	unstim.vs.8hr	8hr
chr1	197260000	0.130559	1.56003	1.51892	Non-Differential	Non-Differential	unstim.vs.8hr	Unstim
chr1	197560000	0.614949	1.52456	1.26397	Non-Differential	Non-Differential	unstim.vs.8hr	Unstim
chr1	197700000	-0.546195	1.27464	1.53632	Non-Differential	Non-Differential	unstim.vs.8hr	8hr
chr1	197840000	0.995476	2.07848	1.65217	Non-Differential	Non-Differential	unstim.vs.8hr	Unstim
chr1	197850000	0.428958	1.58182	1.40601	Non-Differential	Non-Differential	unstim.vs.8hr	Unstim
chr1	198020000	-1.605	0.915484	1.65189	Non-Differential	Non-Differential	unstim.vs.8hr	8hr
chr1	198110000	2.71659	1.94739	0.741174	Differential	Complex	unstim.vs.8hr	Unstim
chr1	198120000	4.9673	5.15362	2.96637	Shifted	Shifted	unstim.vs.8hr	Unstim
chr1	198130000	-2.28308	2.67515	3.73846	Shifted	Shifted	unstim.vs.8hr	8hr
chr1	198280000	1.72167	1.7731	1.01485	Non-Differential	Non-Differential	unstim.vs.8hr	Unstim
chr1	198490000	0.143561	2.16673	2.12672	Non-Differential	Non-Differential	unstim.vs.8hr	Unstim
chr1	198570000	-5.08451	0.57078	2.87687	Shifted	Shifted	unstim.vs.8hr	8hr
chr1	198580000	4.90469	4.11985	1.94903	Shifted	Shifted	unstim.vs.8hr	Unstim
chr1	198590000	4.16397	2.50456	0.65016	Differential	Complex	unstim.vs.8hr	Unstim
chr1	198730000	-1.06334	1.68339	2.18365	Non-Differential	Non-Differential	unstim.vs.8hr	8hr
chr1	198740000	1.14784	3.1117	2.62836	Non-Differential	Non-Differential	unstim.vs.8hr	Unstim
chr1	198900000	-0.957865	1.93595	2.39141	Non-Differential	Non-Differential	unstim.vs.8hr	8hr
chr1	198910000	-1.92346	1.00414	1.88559	Non-Differential	Non-Differential	unstim.vs.8hr	8hr
chr1	199080000	-1.73739	0.928566	1.725	Non-Differential	Non-Differential	unstim.vs.8hr	8hr
chr1	199210000	-2.63697	1.17927	2.38542	Differential	Merge	unstim.vs.8hr	8hr
chr1	199220000	-1.74925	1.22412	2.02932	Non-Differential	Non-Differential	unstim.vs.8hr	8hr
chr1	199350000	-1.31255	0.998335	1.60343	Non-Differential	Non-Differential	unstim.vs.8hr	8hr
chr1	199650000	-1.68449	1.3713	2.1489	Non-Differential	Non-Differential	unstim.vs.8hr	8hr
chr1	199800000	-0.382004	1.81217	2.00577	Non-Differential	Non-Differential	unstim.vs.8hr	8hr
chr1	200090000	0.916723	1.65584	1.26028	Non-Differential	Non-Differential	unstim.vs.8hr	Unstim
chr1	200100000	-0.730038	1.4885	1.83579	Non-Differential	Non-Differential	unstim.vs.8hr	8hr
chr1	200380000	-2.56892	0.795248	1.96621	Differential	Merge	unstim.vs.8hr	8hr
chr1	200700000	0.436246	1.74594	1.56872	Non-Differential	Non-Differential	unstim.vs.8hr	Unstim
chr1	200710000	-0.395522	3.88771	4.1113	Non-Differential	Non-Differential	unstim.vs.8hr	8hr
chr1	200860000	-1.1027	1.24443	1.75745	Non-Differential	Non-Differential	unstim.vs.8hr	8hr
chr1	201010000	0.0390053	1.97716	1.98225	Non-Differential	Non-Differential	unstim.vs.8hr	Unstim
chr1	201020000	1.01008	4.17529	3.76648	Non-Differential	Non-Differential	unstim.vs.8hr	Unstim
chr1	201030000	-0.16955	2.16422	2.26579	Non-Differential	Non-Differential	unstim.vs.8hr	8hr
chr1	201140000	-0.637986	2.0371	2.34906	Non-Differential	Non-Differential	unstim.vs.8hr	8hr
chr1	201150000	-0.165773	1.82048	1.91638	Non-Differential	Non-Differential	unstim.vs.8hr	8hr
chr1	201440000	0.389467	1.76586	1.61002	Non-Differential	Non-Differential	unstim.vs.8hr	Unstim
chr1	201590000	0.257731	1.52576	1.42674	Non-Differential	Non-Differential	unstim.vs.8hr	Unstim
chr1	201760000	0.0933786	1.68217	1.65928	Non-Differential	Non-Differential	unstim.vs.8hr	Unstim
chr1	201770000	1.034	2.51563	2.07692	Non-Differential	Non-Differential	unstim.vs.8hr	Unstim
chr1	201910000	1.39605	1.66743	1.05522	Non-Differential	Non-Differential	unstim.vs.8hr	Unstim
chr1	201920000	-1.41696	1.05653	1.70952	Non-Differential	Non-Differential	unstim.vs.8hr	8hr
chr1	202160000	0.916705	2.30588	1.9178	Non-Differential	Non-Differential	unstim.vs.8hr	Unstim
chr1	202170000	0.681517	1.78967	1.50203	Non-Differential	Non-Differential	unstim.vs.8hr	Unstim
chr1	202180000	0.643043	1.57313	1.30039	Non-Differential	Non-Differential	unstim.vs.8hr	Unstim
chr1	202310000	-1.37781	0.940448	1.57439	Non-Differential	Non-Differential	unstim.vs.8hr	8hr
chr1	202320000	-0.150268	1.79801	1.88664	Non-Differential	Non-Differential	unstim.vs.8hr	8hr
chr1	202510000	-0.0300894	1.50866	1.53962	Non-Differential	Non-Differential	unstim.vs.8hr	8hr
chr1	202520000	0.428748	1.81608	1.64306	Non-Differential	Non-Differential	unstim.vs.8hr	Unstim
chr1	202530000	-0.395472	1.35269	1.5471	Non-Differential	Non-Differential	unstim.vs.8hr	8hr
chr1	202680000	-1.0772	1.20471	1.70574	Non-Differential	Non-Differential	unstim.vs.8hr	8hr
chr1	202810000	-0.367043	1.7295	1.91539	Non-Differential	Non-Differential	unstim.vs.8hr	8hr
chr1	202980000	-1.2438	1.76256	2.34535	Non-Differential	Non-Differential	unstim.vs.8hr	8hr
chr1	202990000	1.05358	2.44454	1.99616	Non-Differential	Non-Differential	unstim.vs.8hr	Unstim
chr1	203000000	2.47301	1.9052	0.808663	Differential	Split	unstim.vs.8hr	Unstim
chr1	203100000	0.333618	1.70871	1.57748	Non-Differential	Non-Differential	unstim.vs.8hr	Unstim
chr1	203230000	0.879465	5.51645	5.18214	Non-Differential	Non-Differential	unstim.vs.8hr	Unstim
chr1	203240000	0.470605	2.44063	2.25586	Non-Differential	Non-Differential	unstim.vs.8hr	Unstim
chr1	203310000	1.61418	1.60287	0.891269	Non-Differential	Non-Differential	unstim.vs.8hr	Unstim
chr1	203320000	1.0859	1.58725	1.1144	Non-Differential	Non-Differential	unstim.vs.8hr	Unstim
chr1	203430000	2.12176	3.00286	2.0778	Differential	Strength Change	unstim.vs.8hr	Unstim
chr1	203440000	0.314499	1.63702	1.51361	Non-Differential	Non-Differential	unstim.vs.8hr	Unstim
chr1	203480000	-1.45408	0.984177	1.65312	Non-Differential	Non-Differential	unstim.vs.8hr	8hr
chr1	203560000	0.120914	1.62167	1.58564	Non-Differential	Non-Differential	unstim.vs.8hr	Unstim
chr1	203570000	-0.335375	2.16441	2.34098	Non-Differential	Non-Differential	unstim.vs.8hr	8hr
chr1	203580000	-0.342377	1.41817	1.58932	Non-Differential	Non-Differential	unstim.vs.8hr	8hr
chr1	203590000	1.13067	1.86562	1.37571	Non-Differential	Non-Differential	unstim.vs.8hr	Unstim
chr1	203670000	-0.74788	1.6072	1.96392	Non-Differential	Non-Differential	unstim.vs.8hr	8hr
chr1	203680000	0.491901	3.22501	3.03963	Non-Differential	Non-Differential	unstim.vs.8hr	Unstim
chr1	203690000	0.68863	1.67627	1.38411	Non-Differential	Non-Differential	unstim.vs.8hr	Unstim
chr1	203830000	-2.42621	0.981756	2.09032	Differential	Merge	unstim.vs.8hr	8hr
chr1	203840000	-0.160028	1.53415	1.62417	Non-Differential	Non-Differential	unstim.vs.8hr	8hr
chr1	203850000	1.40812	2.27358	1.66289	Non-Differential	Non-Differential	unstim.vs.8hr	Unstim
chr1	204010000	0.266054	1.74698	1.64674	Non-Differential	Non-Differential	unstim.vs.8hr	Unstim
chr1	204120000	-0.627113	1.6208	1.92306	Non-Differential	Non-Differential	unstim.vs.8hr	8hr
chr1	204130000	0.523442	2.28176	2.07127	Non-Differential	Non-Differential	unstim.vs.8hr	Unstim
chr1	204320000	-0.107773	2.0021	2.07386	Non-Differential	Non-Differential	unstim.vs.8hr	8hr
chr1	204330000	-2.50305	1.89851	3.05237	Differential	Strength Change	unstim.vs.8hr	8hr
chr1	204470000	1.61862	3.44048	2.748	Non-Differential	Non-Differential	unstim.vs.8hr	Unstim
chr1	204480000	-0.604	4.65958	4.98633	Non-Differential	Non-Differential	unstim.vs.8hr	8hr
chr1	204910000	-1.2238	0.986	1.55081	Non-Differential	Non-Differential	unstim.vs.8hr	8hr
chr1	205050000	-0.265965	1.6545	1.79381	Non-Differential	Non-Differential	unstim.vs.8hr	8hr
chr1	205230000	-0.10364	3.30632	3.39121	Non-Differential	Non-Differential	unstim.vs.8hr	8hr
chr1	205240000	2.81473	3.57741	2.34555	Differential	Strength Change	unstim.vs.8hr	Unstim
chr1	205320000	0.606769	1.84067	1.58742	Non-Differential	Non-Differential	unstim.vs.8hr	Unstim
chr1	205500000	1.24312	2.4971	1.9636	Non-Differential	Non-Differential	unstim.vs.8hr	Unstim
chr1	205630000	0.274467	2.93335	2.84296	Non-Differential	Non-Differential	unstim.vs.8hr	Unstim
chr1	205790000	1.66445	2.40226	1.67711	Non-Differential	Non-Differential	unstim.vs.8hr	Unstim
chr1	206070000	0.606136	10.4044	10.2499	Non-Differential	Non-Differential	unstim.vs.8hr	Unstim
chr1	206220000	-0.381629	1.63627	1.82768	Non-Differential	Non-Differential	unstim.vs.8hr	8hr
chr1	206230000	-0.772957	2.64105	3.021	Non-Differential	Non-Differential	unstim.vs.8hr	8hr
chr1	206240000	-1.54424	1.32063	2.03421	Non-Differential	Non-Differential	unstim.vs.8hr	8hr
chr1	206480000	1.13958	9.35093	8.94307	Non-Differential	Non-Differential	unstim.vs.8hr	Unstim
chr1	206640000	-2.02747	0.61921	1.54327	Differential	Complex	unstim.vs.8hr	8hr
chr1	206710000	3.73288	1.95533	0.289581	Differential	Complex	unstim.vs.8hr	Unstim
chr1	206840000	-0.81865	1.46819	1.85531	Non-Differential	Non-Differential	unstim.vs.8hr	8hr
chr1	206850000	0.639596	1.63988	1.36948	Non-Differential	Non-Differential	unstim.vs.8hr	Unstim
chr1	206860000	0.00158531	1.68337	1.70201	Non-Differential	Non-Differential	unstim.vs.8hr	Unstim
chr1	206910000	0.657641	1.79118	1.51435	Non-Differential	Non-Differential	unstim.vs.8hr	Unstim
chr1	206980000	2.73148	4.59384	3.41132	Differential	Strength Change	unstim.vs.8hr	Unstim
chr1	206990000	-1.61245	3.68571	4.45734	Non-Differential	Non-Differential	unstim.vs.8hr	8hr
chr1	207110000	0.30164	2.13503	2.02316	Non-Differential	Non-Differential	unstim.vs.8hr	Unstim
chr1	207160000	2.89113	1.89381	0.608042	Differential	Split	unstim.vs.8hr	Unstim
chr1	207260000	1.52575	4.14462	3.50224	Non-Differential	Non-Differential	unstim.vs.8hr	Unstim
chr1	207270000	0.659112	2.10765	1.8338	Non-Differential	Non-Differential	unstim.vs.8hr	Unstim
chr1	207430000	1.93505	1.98709	1.1348	Non-Differential	Non-Differential	unstim.vs.8hr	Unstim
chr1	207440000	0.565938	1.96757	1.73424	Non-Differential	Non-Differential	unstim.vs.8hr	Unstim
chr1	207450000	-0.932379	1.24714	1.68316	Non-Differential	Non-Differential	unstim.vs.8hr	8hr
chr1	207580000	-2.05953	2.56909	3.53007	Differential	Strength Change	unstim.vs.8hr	8hr
chr1	207590000	-1.49846	0.931067	1.61947	Non-Differential	Non-Differential	unstim.vs.8hr	8hr
chr1	207710000	-6.99094	3.88002	7.08636	Differential	Strength Change	unstim.vs.8hr	8hr
chr1	207870000	2.4786	1.50016	0.396433	Differential	Complex	unstim.vs.8hr	Unstim
chr1	207880000	2.80216	1.71064	0.463002	Differential	Complex	unstim.vs.8hr	Unstim
chr1	207890000	-1.29452	1.05392	1.6515	Non-Differential	Non-Differential	unstim.vs.8hr	8hr
chr1	207910000	-2.82714	0.337011	1.61949	Differential	Merge	unstim.vs.8hr	8hr
chr1	208050000	-1.14032	2.28369	2.82567	Non-Differential	Non-Differential	unstim.vs.8hr	8hr
chr1	208060000	-0.00827868	4.17297	4.22469	Non-Differential	Non-Differential	unstim.vs.8hr	8hr
chr1	208180000	-0.371371	1.72037	1.90811	Non-Differential	Non-Differential	unstim.vs.8hr	8hr
chr1	208190000	-0.232236	1.39733	1.51842	Non-Differential	Non-Differential	unstim.vs.8hr	8hr
chr1	208780000	-0.401113	1.34199	1.53883	Non-Differential	Non-Differential	unstim.vs.8hr	8hr
chr1	208940000	-0.798417	1.26479	1.64043	Non-Differential	Non-Differential	unstim.vs.8hr	8hr
chr1	209240000	-0.592536	1.33225	1.61555	Non-Differential	Non-Differential	unstim.vs.8hr	8hr
chr1	209860000	-0.43445	1.81486	2.03221	Non-Differential	Non-Differential	unstim.vs.8hr	8hr
chr1	209870000	-0.722713	1.70888	2.05538	Non-Differential	Non-Differential	unstim.vs.8hr	8hr
chr1	210000000	-0.407886	1.3847	1.58509	Non-Differential	Non-Differential	unstim.vs.8hr	8hr
chr1	210010000	-0.525467	2.01321	2.27401	Non-Differential	Non-Differential	unstim.vs.8hr	8hr
chr1	210020000	-0.349188	1.52306	1.6985	Non-Differential	Non-Differential	unstim.vs.8hr	8hr
chr1	210150000	0.302881	1.87088	1.75541	Non-Differential	Non-Differential	unstim.vs.8hr	Unstim
chr1	210290000	-0.305261	1.88515	2.04489	Non-Differential	Non-Differential	unstim.vs.8hr	8hr
chr1	210580000	-1.25331	1.3539	1.93629	Non-Differential	Non-Differential	unstim.vs.8hr	8hr
chr1	210620000	-3.23533	0.19367	1.65911	Differential	Merge	unstim.vs.8hr	8hr
chr1	210900000	-0.175998	1.71552	1.81484	Non-Differential	Non-Differential	unstim.vs.8hr	8hr
chr1	211480000	0.597305	1.60621	1.35454	Non-Differential	Non-Differential	unstim.vs.8hr	Unstim
chr1	211490000	2.00659	2.92488	2.05101	Differential	Strength Change	unstim.vs.8hr	Unstim
chr1	211500000	-0.431938	1.33416	1.54485	Non-Differential	Non-Differential	unstim.vs.8hr	8hr
chr1	211650000	0.12286	1.81763	1.78297	Non-Differential	Non-Differential	unstim.vs.8hr	Unstim
chr1	211830000	2.96928	1.65758	0.333749	Differential	Split	unstim.vs.8hr	Unstim
chr1	211930000	0.841045	1.58737	1.22525	Non-Differential	Non-Differential	unstim.vs.8hr	Unstim
chr1	211940000	0.831917	1.8838	1.52922	Non-Differential	Non-Differential	unstim.vs.8hr	Unstim
chr1	212090000	0.0454134	1.7101	1.70922	Non-Differential	Non-Differential	unstim.vs.8hr	Unstim
chr1	212240000	-0.59674	1.77074	2.06099	Non-Differential	Non-Differential	unstim.vs.8hr	8hr
chr1	212250000	1.5013	2.26916	1.61627	Non-Differential	Non-Differential	unstim.vs.8hr	Unstim
chr1	212390000	0.827936	1.72137	1.36673	Non-Differential	Non-Differential	unstim.vs.8hr	Unstim
chr1	212540000	-0.216139	2.04741	2.16871	Non-Differential	Non-Differential	unstim.vs.8hr	8hr
chr1	212650000	-3.28236	1.63676	3.14006	Differential	Strength Change	unstim.vs.8hr	8hr
chr1	212830000	0.578285	1.95721	1.71818	Non-Differential	Non-Differential	unstim.vs.8hr	Unstim
chr1	212840000	-1.07758	1.61719	2.12313	Non-Differential	Non-Differential	unstim.vs.8hr	8hr
chr1	212960000	-2.51661	1.11825	2.26927	Differential	Merge	unstim.vs.8hr	8hr
chr1	212970000	0.114104	2.42081	2.39704	Non-Differential	Non-Differential	unstim.vs.8hr	Unstim
chr1	212980000	1.21179	1.6975	1.16897	Non-Differential	Non-Differential	unstim.vs.8hr	Unstim
chr1	213150000	1.02645	1.59688	1.15102	Non-Differential	Non-Differential	unstim.vs.8hr	Unstim
chr1	213160000	0.38401	2.12653	1.97731	Non-Differential	Non-Differential	unstim.vs.8hr	Unstim
chr1	213170000	-0.942839	1.61479	2.05977	Non-Differential	Non-Differential	unstim.vs.8hr	8hr
chr1	213290000	-1.17075	1.53473	2.08186	Non-Differential	Non-Differential	unstim.vs.8hr	8hr
chr1	213450000	-0.880763	1.15675	1.56839	Non-Differential	Non-Differential	unstim.vs.8hr	8hr
chr1	213730000	1.19954	1.54966	1.02498	Non-Differential	Non-Differential	unstim.vs.8hr	Unstim
chr1	213740000	-0.887242	1.35569	1.77254	Non-Differential	Non-Differential	unstim.vs.8hr	8hr
chr1	214030000	1.4129	1.76208	1.14334	Non-Differential	Non-Differential	unstim.vs.8hr	Unstim
chr1	214040000	0.884589	1.74151	1.36147	Non-Differential	Non-Differential	unstim.vs.8hr	Unstim
chr1	214500000	-0.63288	1.48397	1.78726	Non-Differential	Non-Differential	unstim.vs.8hr	8hr
chr1	214510000	0.760677	4.12696	3.8304	Non-Differential	Non-Differential	unstim.vs.8hr	Unstim
chr1	214520000	0.698474	2.07675	1.78474	Non-Differential	Non-Differential	unstim.vs.8hr	Unstim
chr1	214640000	0.72555	1.76811	1.46031	Non-Differential	Non-Differential	unstim.vs.8hr	Unstim
chr1	214770000	1.53412	1.63618	0.961172	Non-Differential	Non-Differential	unstim.vs.8hr	Unstim
chr1	215090000	-0.81287	1.25933	1.64144	Non-Differential	Non-Differential	unstim.vs.8hr	8hr
chr1	215240000	0.512237	1.55391	1.34012	Non-Differential	Non-Differential	unstim.vs.8hr	Unstim
chr1	215700000	0.461293	1.60433	1.41415	Non-Differential	Non-Differential	unstim.vs.8hr	Unstim
chr1	216130000	-0.34061	1.63168	1.80449	Non-Differential	Non-Differential	unstim.vs.8hr	8hr
chr1	216450000	1.59584	1.53224	0.828125	Non-Differential	Non-Differential	unstim.vs.8hr	Unstim
chr1	216580000	0.51863	1.79551	1.5816	Non-Differential	Non-Differential	unstim.vs.8hr	Unstim
chr1	216740000	0.177116	1.62262	1.56118	Non-Differential	Non-Differential	unstim.vs.8hr	Unstim
chr1	217630000	0.69776	1.55186	1.25414	Non-Differential	Non-Differential	unstim.vs.8hr	Unstim
chr1	217780000	1.20063	1.55106	1.0259	Non-Differential	Non-Differential	unstim.vs.8hr	Unstim
chr1	217800000	-1.67154	0.834308	1.59988	Non-Differential	Non-Differential	unstim.vs.8hr	8hr
chr1	217940000	-0.000738795	1.75437	1.77488	Non-Differential	Non-Differential	unstim.vs.8hr	8hr
chr1	217950000	-0.302613	1.44669	1.60019	Non-Differential	Non-Differential	unstim.vs.8hr	8hr
chr1	218090000	-0.467995	1.49525	1.7241	Non-Differential	Non-Differential	unstim.vs.8hr	8hr
chr1	218410000	0.427515	1.5682	1.39288	Non-Differential	Non-Differential	unstim.vs.8hr	Unstim
chr1	218530000	2.21611	1.61459	0.630894	Differential	Split	unstim.vs.8hr	Unstim
chr1	218550000	-0.773654	1.14397	1.50702	Non-Differential	Non-Differential	unstim.vs.8hr	8hr
chr1	219280000	-0.295237	1.36194	1.51113	Non-Differential	Non-Differential	unstim.vs.8hr	8hr
chr1	219290000	0.79089	1.5186	1.17838	Non-Differential	Non-Differential	unstim.vs.8hr	Unstim
chr1	219440000	-1.0081	1.15538	1.62459	Non-Differential	Non-Differential	unstim.vs.8hr	8hr
chr1	220040000	0.39486	1.52381	1.36275	Non-Differential	Non-Differential	unstim.vs.8hr	Unstim
chr1	220340000	-1.14041	1.03814	1.56584	Non-Differential	Non-Differential	unstim.vs.8hr	8hr
chr1	220480000	0.210385	1.5409	1.46347	Non-Differential	Non-Differential	unstim.vs.8hr	Unstim
chr1	220640000	0.284116	2.34147	2.2399	Non-Differential	Non-Differential	unstim.vs.8hr	Unstim
chr1	221540000	-0.778808	1.15262	1.5181	Non-Differential	Non-Differential	unstim.vs.8hr	8hr
chr1	222150000	0.28462	1.5171	1.40582	Non-Differential	Non-Differential	unstim.vs.8hr	Unstim
chr1	222450000	0.284128	1.51213	1.40101	Non-Differential	Non-Differential	unstim.vs.8hr	Unstim
chr1	222580000	1.4766	2.41826	1.77826	Non-Differential	Non-Differential	unstim.vs.8hr	Unstim
chr1	222590000	1.21179	2.22624	1.70379	Non-Differential	Non-Differential	unstim.vs.8hr	Unstim
chr1	222740000	0.342507	1.84453	1.71083	Non-Differential	Non-Differential	unstim.vs.8hr	Unstim
chr1	222750000	1.56615	2.36406	1.68294	Non-Differential	Non-Differential	unstim.vs.8hr	Unstim
chr1	222760000	-1.77902	1.40238	2.22309	Non-Differential	Non-Differential	unstim.vs.8hr	8hr
chr1	222890000	-1.00816	1.81145	2.28823	Non-Differential	Non-Differential	unstim.vs.8hr	8hr
chr1	222900000	-0.0136445	2.53016	2.56543	Non-Differential	Non-Differential	unstim.vs.8hr	8hr
chr1	222910000	1.57443	2.1489	1.46156	Non-Differential	Non-Differential	unstim.vs.8hr	Unstim
chr1	223200000	1.39672	2.35746	1.75289	Non-Differential	Non-Differential	unstim.vs.8hr	Unstim
chr1	223300000	-0.359702	2.95558	3.15225	Non-Differential	Non-Differential	unstim.vs.8hr	8hr
chr1	223310000	-0.11495	2.44333	2.52341	Non-Differential	Non-Differential	unstim.vs.8hr	8hr
chr1	223490000	-1.63845	0.87711	1.6282	Non-Differential	Non-Differential	unstim.vs.8hr	8hr
chr1	223650000	-0.762824	1.63866	2.0025	Non-Differential	Non-Differential	unstim.vs.8hr	8hr
chr1	223860000	1.20463	2.35878	1.8411	Non-Differential	Non-Differential	unstim.vs.8hr	Unstim
chr1	223870000	-0.0980073	1.7482	1.81263	Non-Differential	Non-Differential	unstim.vs.8hr	8hr
chr1	224110000	-2.70096	0.586398	1.81468	Differential	Merge	unstim.vs.8hr	8hr
chr1	224290000	1.81535	2.51607	1.724	Non-Differential	Non-Differential	unstim.vs.8hr	Unstim
chr1	224300000	-0.998479	3.11426	3.60165	Non-Differential	Non-Differential	unstim.vs.8hr	8hr
chr1	224430000	-0.129352	1.88094	1.96107	Non-Differential	Non-Differential	unstim.vs.8hr	8hr
chr1	224440000	0.31353	1.72466	1.60269	Non-Differential	Non-Differential	unstim.vs.8hr	Unstim
chr1	224570000	-0.0467109	1.69562	1.73625	Non-Differential	Non-Differential	unstim.vs.8hr	8hr
chr1	224580000	1.33687	1.71215	1.12722	Non-Differential	Non-Differential	unstim.vs.8hr	Unstim
chr1	224870000	-0.275884	1.41485	1.55589	Non-Differential	Non-Differential	unstim.vs.8hr	8hr
chr1	225030000	-0.0422341	1.62802	1.66584	Non-Differential	Non-Differential	unstim.vs.8hr	8hr
chr1	225320000	0.527864	1.503	1.28155	Non-Differential	Non-Differential	unstim.vs.8hr	Unstim
chr1	225480000	0.717226	2.17332	1.87394	Non-Differential	Non-Differential	unstim.vs.8hr	Unstim
chr1	225610000	-3.66315	0.928519	2.59589	Shifted	Shifted	unstim.vs.8hr	8hr
chr1	225660000	5.07974	2.44616	0.176925	Shifted	Shifted	unstim.vs.8hr	Unstim
chr1	225780000	0.637413	1.73757	1.46927	Non-Differential	Non-Differential	unstim.vs.8hr	Unstim
chr1	225940000	0.501612	1.54485	1.33575	Non-Differential	Non-Differential	unstim.vs.8hr	Unstim
chr1	225950000	1.27847	2.09007	1.5359	Non-Differential	Non-Differential	unstim.vs.8hr	Unstim
chr1	226100000	1.31834	2.58841	2.02194	Non-Differential	Non-Differential	unstim.vs.8hr	Unstim
chr1	226110000	1.66402	2.79526	2.07483	Non-Differential	Non-Differential	unstim.vs.8hr	Unstim
chr1	226250000	3.63048	7.16355	5.604	Differential	Strength Change	unstim.vs.8hr	Unstim
chr1	226390000	0.375811	3.00125	2.8658	Non-Differential	Non-Differential	unstim.vs.8hr	Unstim
chr1	226400000	1.30391	2.24415	1.68025	Non-Differential	Non-Differential	unstim.vs.8hr	Unstim
chr1	226540000	1.00637	1.54741	1.11007	Non-Differential	Non-Differential	unstim.vs.8hr	Unstim
chr1	226810000	-0.293665	4.19947	4.38057	Non-Differential	Non-Differential	unstim.vs.8hr	8hr
chr1	226820000	-0.662196	2.14151	2.46562	Non-Differential	Non-Differential	unstim.vs.8hr	8hr
chr1	226930000	9.42048	3.86637	-0.349683	Differential	Split	unstim.vs.8hr	Unstim
chr1	227020000	0.0369275	3.10227	3.12124	Non-Differential	Non-Differential	unstim.vs.8hr	Unstim
chr1	227130000	-0.537868	2.38125	2.65189	Non-Differential	Non-Differential	unstim.vs.8hr	8hr
chr1	227290000	-1.36176	1.17216	1.80151	Non-Differential	Non-Differential	unstim.vs.8hr	8hr
chr1	227430000	0.0249662	1.53239	1.53872	Non-Differential	Non-Differential	unstim.vs.8hr	Unstim
chr1	227590000	0.389622	1.68411	1.52727	Non-Differential	Non-Differential	unstim.vs.8hr	Unstim
chr1	227730000	-1.2499	1.34976	1.93056	Non-Differential	Non-Differential	unstim.vs.8hr	8hr
chr1	227890000	0.355485	1.56862	1.42589	Non-Differential	Non-Differential	unstim.vs.8hr	Unstim
chr1	227900000	0.590468	2.33373	2.09352	Non-Differential	Non-Differential	unstim.vs.8hr	Unstim
chr1	227910000	0.557441	2.43229	2.20815	Non-Differential	Non-Differential	unstim.vs.8hr	Unstim
chr1	228160000	-1.31044	1.61931	2.23059	Non-Differential	Non-Differential	unstim.vs.8hr	8hr
chr1	228170000	0.280029	3.01933	2.9274	Non-Differential	Non-Differential	unstim.vs.8hr	Unstim
chr1	228300000	1.49486	1.98235	1.32908	Non-Differential	Non-Differential	unstim.vs.8hr	Unstim
chr1	228360000	-0.833726	1.80019	2.19795	Non-Differential	Non-Differential	unstim.vs.8hr	8hr
chr1	228470000	-0.429796	1.96958	2.18661	Non-Differential	Non-Differential	unstim.vs.8hr	8hr
chr1	228480000	-0.458997	1.57694	1.80266	Non-Differential	Non-Differential	unstim.vs.8hr	8hr
chr1	228630000	1.16377	1.90674	1.40233	Non-Differential	Non-Differential	unstim.vs.8hr	Unstim
chr1	228640000	0.612183	1.63912	1.38111	Non-Differential	Non-Differential	unstim.vs.8hr	Unstim
chr1	228750000	-1.49595	5.02973	5.76413	Non-Differential	Non-Differential	unstim.vs.8hr	8hr
chr1	228760000	7.2482	4.67229	1.44794	Differential	Complex	unstim.vs.8hr	Unstim
chr1	228770000	8.43018	5.43913	1.68904	Differential	Strength Change	unstim.vs.8hr	Unstim
chr1	228780000	-0.376058	2.70795	2.90916	Non-Differential	Non-Differential	unstim.vs.8hr	8hr
chr1	228930000	-3.21346	1.48251	2.95288	Differential	Merge	unstim.vs.8hr	8hr
chr1	229220000	0.445838	1.54928	1.36546	Non-Differential	Non-Differential	unstim.vs.8hr	Unstim
chr1	229230000	0.0270416	1.60022	1.60639	Non-Differential	Non-Differential	unstim.vs.8hr	Unstim
chr1	229390000	1.66813	3.64429	2.93176	Non-Differential	Non-Differential	unstim.vs.8hr	Unstim
chr1	229520000	-0.826982	1.25544	1.64389	Non-Differential	Non-Differential	unstim.vs.8hr	8hr
chr1	229800000	-2.08438	1.42094	2.37996	Differential	Merge	unstim.vs.8hr	8hr
chr1	229810000	-0.037698	1.63192	1.66773	Non-Differential	Non-Differential	unstim.vs.8hr	8hr
chr1	229970000	0.364632	1.5196	1.37216	Non-Differential	Non-Differential	unstim.vs.8hr	Unstim
chr1	229980000	0.51322	1.73495	1.52279	Non-Differential	Non-Differential	unstim.vs.8hr	Unstim
chr1	230130000	-1.30986	0.90201	1.50478	Non-Differential	Non-Differential	unstim.vs.8hr	8hr
chr1	230450000	-1.12039	1.68651	2.21261	Non-Differential	Non-Differential	unstim.vs.8hr	8hr
chr1	230740000	0.125037	2.09157	2.05908	Non-Differential	Non-Differential	unstim.vs.8hr	Unstim
chr1	230890000	-0.947507	1.12272	1.56415	Non-Differential	Non-Differential	unstim.vs.8hr	8hr
chr1	231040000	0.785746	1.5425	1.20487	Non-Differential	Non-Differential	unstim.vs.8hr	Unstim
chr1	231180000	-0.622941	1.7777	2.07987	Non-Differential	Non-Differential	unstim.vs.8hr	8hr
chr1	231190000	-0.041692	2.33017	2.37582	Non-Differential	Non-Differential	unstim.vs.8hr	8hr
chr1	231340000	0.368631	2.82479	2.69055	Non-Differential	Non-Differential	unstim.vs.8hr	Unstim
chr1	231350000	-1.3798	1.80444	2.44922	Non-Differential	Non-Differential	unstim.vs.8hr	8hr
chr1	231470000	1.06357	2.46199	2.00929	Non-Differential	Non-Differential	unstim.vs.8hr	Unstim
chr1	231480000	-1.78816	0.684573	1.50116	Non-Differential	Non-Differential	unstim.vs.8hr	8hr
chr1	231490000	-3.06016	0.58776	1.97851	Differential	Complex	unstim.vs.8hr	8hr
chr1	231560000	3.06457	3.10759	1.75734	Differential	Strength Change	unstim.vs.8hr	Unstim
chr1	231640000	1.84999	1.94312	1.12879	Non-Differential	Non-Differential	unstim.vs.8hr	Unstim
chr1	231650000	1.74439	2.75661	1.99939	Non-Differential	Non-Differential	unstim.vs.8hr	Unstim
chr1	231660000	-0.519587	2.11882	2.37817	Non-Differential	Non-Differential	unstim.vs.8hr	8hr
chr1	231770000	-1.02048	1.29503	1.77145	Non-Differential	Non-Differential	unstim.vs.8hr	8hr
chr1	231780000	1.0493	1.86279	1.40965	Non-Differential	Non-Differential	unstim.vs.8hr	Unstim
chr1	231930000	-0.876512	1.20311	1.61336	Non-Differential	Non-Differential	unstim.vs.8hr	8hr
chr1	231940000	0.341822	1.61102	1.47495	Non-Differential	Non-Differential	unstim.vs.8hr	Unstim
chr1	232070000	-1.15282	1.58114	2.1207	Non-Differential	Non-Differential	unstim.vs.8hr	8hr
chr1	232080000	-0.881879	1.23434	1.64737	Non-Differential	Non-Differential	unstim.vs.8hr	8hr
chr1	232370000	-0.310665	1.98077	2.14405	Non-Differential	Non-Differential	unstim.vs.8hr	8hr
chr1	233120000	0.824237	1.55334	1.19843	Non-Differential	Non-Differential	unstim.vs.8hr	Unstim
chr1	233290000	-0.860181	1.32394	1.72819	Non-Differential	Non-Differential	unstim.vs.8hr	8hr
chr1	233430000	0.236766	2.15978	2.07753	Non-Differential	Non-Differential	unstim.vs.8hr	Unstim
chr1	233580000	0.911952	1.63491	1.24127	Non-Differential	Non-Differential	unstim.vs.8hr	Unstim
chr1	233730000	-0.539367	1.64967	1.91258	Non-Differential	Non-Differential	unstim.vs.8hr	8hr
chr1	233890000	-0.915827	1.15102	1.57845	Non-Differential	Non-Differential	unstim.vs.8hr	8hr
chr1	234190000	-0.0706842	1.89271	1.94644	Non-Differential	Non-Differential	unstim.vs.8hr	8hr
chr1	234330000	0.113758	1.57932	1.54603	Non-Differential	Non-Differential	unstim.vs.8hr	Unstim
chr1	234340000	-0.0735886	1.7322	1.7854	Non-Differential	Non-Differential	unstim.vs.8hr	8hr
chr1	234350000	-1.61152	0.779444	1.51723	Non-Differential	Non-Differential	unstim.vs.8hr	8hr
chr1	234450000	-0.376674	1.81138	2.00256	Non-Differential	Non-Differential	unstim.vs.8hr	8hr
chr1	234620000	0.0780731	2.27108	2.26188	Non-Differential	Non-Differential	unstim.vs.8hr	Unstim
chr1	234630000	-1.15767	1.98547	2.53187	Non-Differential	Non-Differential	unstim.vs.8hr	8hr
chr1	234740000	-4.21372	2.04862	3.97788	Shifted	Shifted	unstim.vs.8hr	8hr
chr1	234750000	3.17827	4.82301	3.44106	Shifted	Shifted	unstim.vs.8hr	Unstim
chr1	234930000	1.85058	2.18578	1.37397	Non-Differential	Non-Differential	unstim.vs.8hr	Unstim
chr1	234950000	1.89379	1.56584	0.727354	Non-Differential	Non-Differential	unstim.vs.8hr	Unstim
chr1	235060000	-0.211541	1.45866	1.57111	Non-Differential	Non-Differential	unstim.vs.8hr	8hr
chr1	235100000	-1.93704	1.49371	2.38693	Non-Differential	Non-Differential	unstim.vs.8hr	8hr
chr1	235240000	1.15015	3.73691	3.25971	Non-Differential	Non-Differential	unstim.vs.8hr	Unstim
chr1	235250000	-1.10717	2.16646	2.6921	Non-Differential	Non-Differential	unstim.vs.8hr	8hr
chr1	235260000	-0.271169	1.40977	1.54862	Non-Differential	Non-Differential	unstim.vs.8hr	8hr
chr1	235410000	0.512829	3.09727	2.90095	Non-Differential	Non-Differential	unstim.vs.8hr	Unstim
chr1	235420000	-0.557584	2.44907	2.72941	Non-Differential	Non-Differential	unstim.vs.8hr	8hr
chr1	235580000	-1.63566	2.37213	3.13915	Non-Differential	Non-Differential	unstim.vs.8hr	8hr
chr1	235590000	0.844262	1.9176	1.55783	Non-Differential	Non-Differential	unstim.vs.8hr	Unstim
chr1	235690000	0.603795	1.54547	1.29017	Non-Differential	Non-Differential	unstim.vs.8hr	Unstim
chr1	236010000	-1.42662	1.3353	1.99586	Non-Differential	Non-Differential	unstim.vs.8hr	8hr
chr1	236020000	-0.822449	1.15684	1.5421	Non-Differential	Non-Differential	unstim.vs.8hr	8hr
chr1	236030000	1.33813	3.16267	2.59385	Non-Differential	Non-Differential	unstim.vs.8hr	Unstim
chr1	236160000	-1.58412	1.35144	2.08342	Non-Differential	Non-Differential	unstim.vs.8hr	8hr
chr1	236460000	0.121573	1.50259	1.46488	Non-Differential	Non-Differential	unstim.vs.8hr	Unstim
chr1	236470000	0.909842	2.05781	1.66999	Non-Differential	Non-Differential	unstim.vs.8hr	Unstim
chr1	236480000	-0.944595	1.35565	1.79845	Non-Differential	Non-Differential	unstim.vs.8hr	8hr
chr1	236770000	-2.0333	2.74593	3.69709	Differential	Strength Change	unstim.vs.8hr	8hr
chr1	236780000	1.05748	2.73424	2.28742	Non-Differential	Non-Differential	unstim.vs.8hr	Unstim
chr1	236910000	0.457356	1.73234	1.54542	Non-Differential	Non-Differential	unstim.vs.8hr	Unstim
chr1	236920000	-0.830775	1.65626	2.05103	Non-Differential	Non-Differential	unstim.vs.8hr	8hr
chr1	237080000	0.974216	1.74477	1.32423	Non-Differential	Non-Differential	unstim.vs.8hr	Unstim
chr1	237240000	1.13472	1.6407	1.14638	Non-Differential	Non-Differential	unstim.vs.8hr	Unstim
chr1	237510000	-1.44099	0.851646	1.51314	Non-Differential	Non-Differential	unstim.vs.8hr	8hr
chr1	237520000	1.00173	1.62113	1.18673	Non-Differential	Non-Differential	unstim.vs.8hr	Unstim
chr1	237970000	-0.985763	1.17518	1.63452	Non-Differential	Non-Differential	unstim.vs.8hr	8hr
chr1	238110000	-0.0945033	1.764	1.82703	Non-Differential	Non-Differential	unstim.vs.8hr	8hr
chr1	238270000	-0.571582	1.28407	1.55734	Non-Differential	Non-Differential	unstim.vs.8hr	8hr
chr1	238420000	0.516712	1.5496	1.33373	Non-Differential	Non-Differential	unstim.vs.8hr	Unstim
chr1	238720000	0.688697	1.70438	1.41251	Non-Differential	Non-Differential	unstim.vs.8hr	Unstim
chr1	238870000	0.220517	1.69614	1.61591	Non-Differential	Non-Differential	unstim.vs.8hr	Unstim
chr1	239020000	-0.382517	1.34011	1.52851	Non-Differential	Non-Differential	unstim.vs.8hr	8hr
chr1	239460000	0.37748	1.97156	1.82352	Non-Differential	Non-Differential	unstim.vs.8hr	Unstim
chr1	239470000	0.12558	1.50429	1.46479	Non-Differential	Non-Differential	unstim.vs.8hr	Unstim
chr1	239940000	1.72906	1.51651	0.751962	Non-Differential	Non-Differential	unstim.vs.8hr	Unstim
chr1	240060000	-0.708252	1.2889	1.62403	Non-Differential	Non-Differential	unstim.vs.8hr	8hr
chr1	240370000	0.147867	1.58828	1.53967	Non-Differential	Non-Differential	unstim.vs.8hr	Unstim
chr1	240670000	0.00720166	1.70665	1.72302	Non-Differential	Non-Differential	unstim.vs.8hr	Unstim
chr1	241120000	-0.8444	1.31939	1.71645	Non-Differential	Non-Differential	unstim.vs.8hr	8hr
chr1	241410000	-0.783741	1.17115	1.53907	Non-Differential	Non-Differential	unstim.vs.8hr	8hr
chr1	241680000	0.429516	2.98473	2.8248	Non-Differential	Non-Differential	unstim.vs.8hr	Unstim
chr1	241690000	-1.70475	2.18195	2.97803	Non-Differential	Non-Differential	unstim.vs.8hr	8hr
chr1	241880000	-1.58738	1.21257	1.94443	Non-Differential	Non-Differential	unstim.vs.8hr	8hr
chr1	241890000	-1.80115	0.889041	1.71385	Non-Differential	Non-Differential	unstim.vs.8hr	8hr
chr1	242030000	0.033045	1.63797	1.64186	Non-Differential	Non-Differential	unstim.vs.8hr	Unstim
chr1	242040000	1.73484	1.64387	0.878169	Non-Differential	Non-Differential	unstim.vs.8hr	Unstim
chr1	242310000	-0.18815	1.6451	1.74911	Non-Differential	Non-Differential	unstim.vs.8hr	8hr
chr1	242320000	1.06145	1.65114	1.19007	Non-Differential	Non-Differential	unstim.vs.8hr	Unstim
chr1	242910000	-0.284336	1.42206	1.56701	Non-Differential	Non-Differential	unstim.vs.8hr	8hr
chr1	243050000	0.885248	2.83534	2.46758	Non-Differential	Non-Differential	unstim.vs.8hr	Unstim
chr1	243060000	-1.72412	1.50566	2.30273	Non-Differential	Non-Differential	unstim.vs.8hr	8hr
chr1	243200000	3.37651	1.85628	0.350563	Shifted	Shifted	unstim.vs.8hr	Unstim
chr1	243210000	-3.07427	0.493135	1.88918	Shifted	Shifted	unstim.vs.8hr	8hr
chr1	243230000	5.54186	2.05189	-0.430874	Shifted	Shifted	unstim.vs.8hr	Unstim
chr1	243240000	-5.76208	-0.508024	2.0921	Shifted	Shifted	unstim.vs.8hr	8hr
chr1	243250000	8.02705	2.5619	-1.03896	Shifted	Shifted	unstim.vs.8hr	Unstim
chr1	243410000	-4.28882	0.864244	2.81385	Differential	Complex	unstim.vs.8hr	8hr
chr1	243420000	-4.95548	0.999145	3.2518	Differential	Complex	unstim.vs.8hr	8hr
chr1	243490000	-0.436588	1.51781	1.73272	Non-Differential	Non-Differential	unstim.vs.8hr	8hr
chr1	243500000	-0.102243	1.51463	1.57829	Non-Differential	Non-Differential	unstim.vs.8hr	8hr
chr1	243510000	-1.92081	1.62944	2.51688	Non-Differential	Non-Differential	unstim.vs.8hr	8hr
chr1	243670000	-0.505232	1.51199	1.75788	Non-Differential	Non-Differential	unstim.vs.8hr	8hr
chr1	243820000	-0.807758	1.69356	2.07835	Non-Differential	Non-Differential	unstim.vs.8hr	8hr
chr1	244010000	0.0478072	2.49859	2.5057	Non-Differential	Non-Differential	unstim.vs.8hr	Unstim
chr1	244120000	-0.126102	1.70683	1.78349	Non-Differential	Non-Differential	unstim.vs.8hr	8hr
chr1	244270000	-0.351869	1.64327	1.82131	Non-Differential	Non-Differential	unstim.vs.8hr	8hr
chr1	244280000	0.87187	1.9327	1.56061	Non-Differential	Non-Differential	unstim.vs.8hr	Unstim
chr1	244430000	0.300117	1.66581	1.54924	Non-Differential	Non-Differential	unstim.vs.8hr	Unstim
chr1	244440000	1.37589	2.69281	2.10151	Non-Differential	Non-Differential	unstim.vs.8hr	Unstim
chr1	244560000	0.857015	1.50778	1.13752	Non-Differential	Non-Differential	unstim.vs.8hr	Unstim
chr1	244740000	0.341779	2.29285	2.16464	Non-Differential	Non-Differential	unstim.vs.8hr	Unstim
chr1	244750000	-0.191106	1.64616	1.75151	Non-Differential	Non-Differential	unstim.vs.8hr	8hr
chr1	244870000	0.359113	1.52697	1.38211	Non-Differential	Non-Differential	unstim.vs.8hr	Unstim
chr1	244990000	3.44784	2.34408	0.811718	Differential	Split	unstim.vs.8hr	Unstim
chr1	245000000	-0.600056	2.76247	3.06561	Non-Differential	Non-Differential	unstim.vs.8hr	8hr
chr1	245030000	-6.06603	-1.07499	1.65607	Differential	Merge	unstim.vs.8hr	8hr
chr1	245210000	1.57775	1.76029	1.06698	Non-Differential	Non-Differential	unstim.vs.8hr	Unstim
chr1	245320000	-0.861326	1.3485	1.75355	Non-Differential	Non-Differential	unstim.vs.8hr	8hr
chr1	245760000	-1.19817	0.969559	1.52259	Non-Differential	Non-Differential	unstim.vs.8hr	8hr
chr1	245770000	1.16188	1.74326	1.23784	Non-Differential	Non-Differential	unstim.vs.8hr	Unstim
chr1	245910000	0.319047	1.92993	1.80782	Non-Differential	Non-Differential	unstim.vs.8hr	Unstim
chr1	246050000	-0.275314	2.0057	2.15327	Non-Differential	Non-Differential	unstim.vs.8hr	8hr
chr1	246520000	-1.58766	1.19241	1.92416	Non-Differential	Non-Differential	unstim.vs.8hr	8hr
chr1	246650000	1.90269	2.04449	1.20749	Non-Differential	Non-Differential	unstim.vs.8hr	Unstim
chr1	246660000	1.03333	2.89931	2.46532	Non-Differential	Non-Differential	unstim.vs.8hr	Unstim
chr1	246670000	-2.40781	0.672947	1.76964	Differential	Merge	unstim.vs.8hr	8hr
chr1	246830000	-0.556991	1.31722	1.58427	Non-Differential	Non-Differential	unstim.vs.8hr	8hr
chr1	246980000	0.48933	3.1655	2.98059	Non-Differential	Non-Differential	unstim.vs.8hr	Unstim
chr1	247100000	-1.16308	1.542	2.08575	Non-Differential	Non-Differential	unstim.vs.8hr	8hr
chr1	247110000	0.106003	1.60746	1.57801	Non-Differential	Non-Differential	unstim.vs.8hr	Unstim
chr1	247260000	0.889885	2.46757	2.09349	Non-Differential	Non-Differential	unstim.vs.8hr	Unstim
chr1	247530000	0.881507	2.14499	1.77099	Non-Differential	Non-Differential	unstim.vs.8hr	Unstim
chr1	247540000	-0.396649	2.30957	2.51552	Non-Differential	Non-Differential	unstim.vs.8hr	8hr
chr1	247550000	0.251403	1.7636	1.67018	Non-Differential	Non-Differential	unstim.vs.8hr	Unstim
chr1	247730000	0.909497	1.79446	1.40377	Non-Differential	Non-Differential	unstim.vs.8hr	Unstim
chr1	248020000	-0.488626	1.81904	2.06095	Non-Differential	Non-Differential	unstim.vs.8hr	8hr
chr1	248330000	-0.858386	1.88441	2.29429	Non-Differential	Non-Differential	unstim.vs.8hr	8hr
chr1	248560000	1.58475	1.56958	0.870906	Non-Differential	Non-Differential	unstim.vs.8hr	Unstim
chr1	248570000	1.408	4.04586	3.45561	Non-Differential	Non-Differential	unstim.vs.8hr	Unstim
chr1	248800000	-5.41012	0.840904	3.29736	Shifted	Shifted	unstim.vs.8hr	8hr
chr1	248810000	4.84817	3.60821	1.45706	Shifted	Shifted	unstim.vs.8hr	Unstim
chr1	249100000	1.38521	2.40981	1.81104	Non-Differential	Non-Differential	unstim.vs.8hr	Unstim
chr1	249110000	-0.480277	2.01115	2.25148	Non-Differential	Non-Differential	unstim.vs.8hr	8hr
chr1	249120000	-1.43082	1.19646	1.85732	NA	NA	unstim.vs.8hr	8hr
chr1	60000	-14.1311	2.78254	8.2135	Shifted	Shifted	8hr.vs.24hr	24hr
chr1	80000	14.0804	8.62033	3.01599	Shifted	Shifted	8hr.vs.24hr	8hr
chr1	840000	1.09256	3.19921	2.72151	Non-Differential	Non-Differential	8hr.vs.24hr	8hr
chr1	960000	0.04504	1.62982	1.58477	Non-Differential	Non-Differential	8hr.vs.24hr	8hr
chr1	970000	1.3565	2.39862	1.83215	Non-Differential	Non-Differential	8hr.vs.24hr	8hr
chr1	1060000	2.33401	2.80102	1.84879	Differential	Strength Change	8hr.vs.24hr	8hr
chr1	1070000	-1.20919	1.92668	2.36282	Non-Differential	Non-Differential	8hr.vs.24hr	24hr
chr1	1140000	0.00912214	3.23184	3.17359	Non-Differential	Non-Differential	8hr.vs.24hr	8hr
chr1	1150000	-1.68794	2.59125	3.20173	Non-Differential	Non-Differential	8hr.vs.24hr	24hr
chr1	1290000	0.0394577	1.79052	1.74491	Non-Differential	Non-Differential	8hr.vs.24hr	8hr
chr1	1310000	0.439451	1.57489	1.37787	Non-Differential	Non-Differential	8hr.vs.24hr	8hr
chr1	1450000	-1.44145	2.36692	2.88565	Non-Differential	Non-Differential	8hr.vs.24hr	24hr
chr1	1570000	-1.57379	2.47468	3.04289	Non-Differential	Non-Differential	8hr.vs.24hr	24hr
chr1	1580000	1.09874	1.56821	1.11573	Non-Differential	Non-Differential	8hr.vs.24hr	8hr
chr1	1590000	0.127249	2.04462	1.96067	Non-Differential	Non-Differential	8hr.vs.24hr	8hr
chr1	1710000	-0.746509	1.95865	2.21488	Non-Differential	Non-Differential	8hr.vs.24hr	24hr
chr1	1720000	0.961072	1.93932	1.53392	Non-Differential	Non-Differential	8hr.vs.24hr	8hr
chr1	1730000	-0.628808	1.57412	1.79123	Non-Differential	Non-Differential	8hr.vs.24hr	24hr
chr1	1850000	1.33268	3.43426	2.8595	Non-Differential	Non-Differential	8hr.vs.24hr	8hr
chr1	1860000	1.92922	2.06042	1.27766	Non-Differential	Non-Differential	8hr.vs.24hr	8hr
chr1	2130000	0.657874	2.82976	2.52682	Non-Differential	Non-Differential	8hr.vs.24hr	8hr
chr1	2140000	-1.22513	1.4063	1.85743	Non-Differential	Non-Differential	8hr.vs.24hr	24hr
chr1	2160000	-0.665536	1.85099	2.07766	Non-Differential	Non-Differential	8hr.vs.24hr	24hr
chr1	2340000	0.355398	2.6807	2.49754	Non-Differential	Non-Differential	8hr.vs.24hr	8hr
chr1	2350000	0.383035	1.894	1.71345	Non-Differential	Non-Differential	8hr.vs.24hr	8hr
chr1	2480000	-0.762984	3.58326	3.81838	Non-Differential	Non-Differential	8hr.vs.24hr	24hr
chr1	2610000	-1.861	6.34957	6.96352	Non-Differential	Non-Differential	8hr.vs.24hr	24hr
chr1	2840000	-0.386604	1.72362	1.84431	Non-Differential	Non-Differential	8hr.vs.24hr	24hr
chr1	3120000	-1.8287	0.967976	1.66051	Non-Differential	Non-Differential	8hr.vs.24hr	24hr
chr1	3270000	0.916991	1.79399	1.40814	Non-Differential	Non-Differential	8hr.vs.24hr	8hr
chr1	3410000	0.492357	2.25867	2.02957	Non-Differential	Non-Differential	8hr.vs.24hr	8hr
chr1	3560000	-1.47462	1.29756	1.84725	Non-Differential	Non-Differential	8hr.vs.24hr	24hr
chr1	3570000	1.83628	2.30498	1.55411	Non-Differential	Non-Differential	8hr.vs.24hr	8hr
chr1	3720000	1.17277	2.4764	1.97984	Non-Differential	Non-Differential	8hr.vs.24hr	8hr
chr1	3990000	1.73866	2.39676	1.68218	Non-Differential	Non-Differential	8hr.vs.24hr	8hr
chr1	4160000	0.445583	1.78184	1.57894	Non-Differential	Non-Differential	8hr.vs.24hr	8hr
chr1	4310000	-0.232528	1.55862	1.62238	Non-Differential	Non-Differential	8hr.vs.24hr	24hr
chr1	4460000	-0.800007	1.27966	1.56813	Non-Differential	Non-Differential	8hr.vs.24hr	24hr
chr1	4920000	0.367652	1.98808	1.8119	Non-Differential	Non-Differential	8hr.vs.24hr	8hr
chr1	5040000	0.665527	1.6011	1.316	Non-Differential	Non-Differential	8hr.vs.24hr	8hr
chr1	5060000	-0.746923	1.4394	1.70459	Non-Differential	Non-Differential	8hr.vs.24hr	24hr
chr1	5220000	-0.0566234	1.79644	1.78798	Non-Differential	Non-Differential	8hr.vs.24hr	24hr
chr1	5520000	0.00682437	1.61243	1.58249	Non-Differential	Non-Differential	8hr.vs.24hr	8hr
chr1	5660000	-1.51558	1.32893	1.89397	Non-Differential	Non-Differential	8hr.vs.24hr	24hr
chr1	5800000	-1.73449	0.873353	1.53096	Non-Differential	Non-Differential	8hr.vs.24hr	24hr
chr1	6110000	0.507851	1.60442	1.38039	Non-Differential	Non-Differential	8hr.vs.24hr	8hr
chr1	6260000	0.942965	2.26538	1.86148	Non-Differential	Non-Differential	8hr.vs.24hr	8hr
chr1	6390000	0.91949	1.84338	1.45573	Non-Differential	Non-Differential	8hr.vs.24hr	8hr
chr1	6400000	0.58524	3.93049	3.63707	Non-Differential	Non-Differential	8hr.vs.24hr	8hr
chr1	6410000	-0.384071	1.60429	1.72602	Non-Differential	Non-Differential	8hr.vs.24hr	24hr
chr1	6550000	1.74121	3.5473	2.81225	Non-Differential	Non-Differential	8hr.vs.24hr	8hr
chr1	6560000	-0.525027	1.63109	1.80701	Non-Differential	Non-Differential	8hr.vs.24hr	24hr
chr1	6840000	-1.90559	1.60415	2.31571	Non-Differential	Non-Differential	8hr.vs.24hr	24hr
chr1	6850000	1.35838	3.48495	2.89936	Non-Differential	Non-Differential	8hr.vs.24hr	8hr
chr1	7000000	1.51431	1.90077	1.28155	Non-Differential	Non-Differential	8hr.vs.24hr	8hr
chr1	7020000	-2.12163	1.44901	2.24696	Differential	Merge	8hr.vs.24hr	24hr
chr1	7160000	-0.777934	1.43952	1.71673	Non-Differential	Non-Differential	8hr.vs.24hr	24hr
chr1	7310000	-0.952375	1.26868	1.6164	Non-Differential	Non-Differential	8hr.vs.24hr	24hr
chr1	7320000	1.31901	1.66446	1.12495	Non-Differential	Non-Differential	8hr.vs.24hr	8hr
chr1	7470000	-0.935434	1.89836	2.22886	Non-Differential	Non-Differential	8hr.vs.24hr	24hr
chr1	7610000	-0.535891	1.65423	1.83397	Non-Differential	Non-Differential	8hr.vs.24hr	24hr
chr1	7710000	-0.706856	1.54762	1.79545	Non-Differential	Non-Differential	8hr.vs.24hr	24hr
chr1	7720000	-0.758724	2.72608	2.97406	Non-Differential	Non-Differential	8hr.vs.24hr	24hr
chr1	7730000	-0.31641	2.62912	2.70727	Non-Differential	Non-Differential	8hr.vs.24hr	24hr
chr1	7890000	-2.86555	0.613973	1.71444	Differential	Merge	8hr.vs.24hr	24hr
chr1	8210000	1.50409	2.27536	1.65377	Non-Differential	Non-Differential	8hr.vs.24hr	8hr
chr1	8380000	-1.07281	1.41827	1.81014	Non-Differential	Non-Differential	8hr.vs.24hr	24hr
chr1	8480000	-1.9967	0.921106	1.67956	Non-Differential	Non-Differential	8hr.vs.24hr	24hr
chr1	8490000	1.53491	2.00353	1.37459	Non-Differential	Non-Differential	8hr.vs.24hr	8hr
chr1	8620000	1.76557	3.64376	2.89764	Non-Differential	Non-Differential	8hr.vs.24hr	8hr
chr1	8630000	2.71295	2.34337	1.252	Differential	Split	8hr.vs.24hr	8hr
chr1	8790000	1.03839	1.88174	1.44734	Non-Differential	Non-Differential	8hr.vs.24hr	8hr
chr1	8800000	-0.0629976	1.74552	1.74039	Non-Differential	Non-Differential	8hr.vs.24hr	24hr
chr1	8940000	-1.95158	1.05922	1.79784	Non-Differential	Non-Differential	8hr.vs.24hr	24hr
chr1	9270000	0.96726	1.5108	1.11025	Non-Differential	Non-Differential	8hr.vs.24hr	8hr
chr1	9390000	-1.10676	1.17383	1.583	Non-Differential	Non-Differential	8hr.vs.24hr	24hr
chr1	9400000	0.294249	2.02781	1.87941	Non-Differential	Non-Differential	8hr.vs.24hr	8hr
chr1	9550000	-0.533681	2.43568	2.60134	Non-Differential	Non-Differential	8hr.vs.24hr	24hr
chr1	9560000	-0.868316	1.56458	1.87471	Non-Differential	Non-Differential	8hr.vs.24hr	24hr
chr1	9680000	2.34691	5.03684	4.04176	Differential	Strength Change	8hr.vs.24hr	8hr
chr1	9690000	-1.32707	3.59445	4.04806	Non-Differential	Non-Differential	8hr.vs.24hr	24hr
chr1	9830000	0.306531	1.90676	1.75565	Non-Differential	Non-Differential	8hr.vs.24hr	8hr
chr1	9840000	-0.0200421	4.00262	3.94263	Non-Differential	Non-Differential	8hr.vs.24hr	24hr
chr1	9850000	-0.967806	1.53365	1.88286	Non-Differential	Non-Differential	8hr.vs.24hr	24hr
[truncated: 45,951 more rows]
