# Supplementary material for: Dynamic chromatin architecture identifies new autoimmune-associated enhancers for IL2 and novel genes regulating CD4+ T cell activation
Source: eLife. 2024 Sep 20;13:RP96852. doi: 10.7554/eLife.96852 (PMC11418197; doi:10.7554/eLife.96852)
Supplement: Supplementary file 8. [file elife-96852-supp8.xlsx]

## Sheet: SupTab_08_stripe_genelist
Table S8: Stripe calls
gene_id	gene_name	stripe_class
ENSG00000000460.12	C1orf112	stripe
ENSG00000000938.8	FGR	stripe
ENSG00000001036.9	FUCA2	stripe
ENSG00000001167.10	NFYA	stripe
ENSG00000001460.13	STPG1	stripe
ENSG00000001461.12	NIPAL3	stripe
ENSG00000001561.6	ENPP4	stripe
ENSG00000002016.12	RAD52	stripe
ENSG00000002549.8	LAP3	stripe
ENSG00000002726.15	AOC1	stripe
ENSG00000002746.10	HECW1	stripe
ENSG00000002822.11	MAD1L1	stripe
ENSG00000002834.13	LASP1	stripe
ENSG00000002919.10	SNX11	stripe
ENSG00000002933.3	TMEM176A	stripe
ENSG00000003056.3	M6PR	stripe
ENSG00000003137.4	CYP26B1	stripe
ENSG00000003147.13	ICA1	stripe
ENSG00000003393.10	ALS2	stripe
ENSG00000003400.10	CASP10	anchor
ENSG00000003402.15	CFLAR	stripe
ENSG00000004059.6	ARF5	stripe
ENSG00000004455.12	AK2	stripe
ENSG00000004468.8	CD38	stripe
ENSG00000004487.11	KDM1A	stripe
ENSG00000004660.10	CAMKK1	stripe
ENSG00000004700.11	RECQL	stripe
ENSG00000004766.11	CCDC132	stripe
ENSG00000004776.7	HSPB6	stripe
ENSG00000004777.14	ARHGAP33	stripe
ENSG00000004779.5	NDUFAB1	stripe
ENSG00000004809.9	SLC22A16	stripe
ENSG00000004864.9	SLC25A13	stripe
ENSG00000004866.14	ST7	stripe
ENSG00000004897.7	CDC27	stripe
ENSG00000004939.9	SLC4A1	stripe
ENSG00000004975.7	DVL2	stripe
ENSG00000005001.5	PRSS22	stripe
ENSG00000005007.8	UPF1	stripe
ENSG00000005020.8	SKAP2	stripe
ENSG00000005059.11	CCDC109B	stripe
ENSG00000005102.8	MEOX1	stripe
ENSG00000005156.7	LIG3	stripe
ENSG00000005175.5	RPAP3	stripe
ENSG00000005187.7	ACSM3	stripe
ENSG00000005189.15	AC004381.6	stripe
ENSG00000005194.10	CIAPIN1	stripe
ENSG00000005206.12	SPPL2B	stripe
ENSG00000005238.15	FAM214B	stripe
ENSG00000005243.5	COPZ2	anchor
ENSG00000005249.8	PRKAR2B	stripe
ENSG00000005302.13	MSL3	stripe
ENSG00000005379.11	BZRAP1	stripe
ENSG00000005381.6	MPO	stripe
ENSG00000005436.9	GCFC2	stripe
ENSG00000005448.12	WDR54	stripe
ENSG00000005469.7	CROT	stripe
ENSG00000005471.11	ABCB4	stripe
ENSG00000005483.15	KMT2E	stripe
ENSG00000005486.12	RHBDD2	stripe
ENSG00000005810.13	MYCBP2	stripe
ENSG00000005812.6	FBXL3	stripe
ENSG00000005882.7	PDK2	stripe
ENSG00000005884.13	ITGA3	stripe
ENSG00000005889.11	ZFX	stripe
ENSG00000006007.7	GDE1	stripe
ENSG00000006015.13	C19orf60	stripe
ENSG00000006016.6	CRLF1	stripe
ENSG00000006042.7	TMEM98	stripe
ENSG00000006047.8	YBX2	stripe
ENSG00000006059.3	KRT33A	stripe
ENSG00000006071.7	ABCC8	stripe
ENSG00000006075.11	CCL3	stripe
ENSG00000006118.10	TMEM132A	stripe
ENSG00000006125.12	AP2B1	stripe
ENSG00000006194.6	ZNF263	stripe
ENSG00000006210.6	CX3CL1	stripe
ENSG00000006282.15	SPATA20	anchor
ENSG00000006283.13	CACNA1G	stripe
ENSG00000006377.9	DLX6	stripe
ENSG00000006432.11	MAP3K9	stripe
ENSG00000006453.9	BAIAP2L1	stripe
ENSG00000006459.6	JHDM1D	stripe
ENSG00000006606.4	CCL26	stripe
ENSG00000006607.9	FARP2	stripe
ENSG00000006625.13	GGCT	anchor
ENSG00000006634.3	DBF4	stripe
ENSG00000006652.9	IFRD1	stripe
ENSG00000006659.8	LGALS14	stripe
ENSG00000006695.6	COX10	stripe
ENSG00000006704.6	GTF2IRD1	stripe
ENSG00000006712.10	PAF1	stripe
ENSG00000006715.11	VPS41	stripe
ENSG00000006831.9	ADIPOR2	stripe
ENSG00000007001.8	UPP2	stripe
ENSG00000007038.6	PRSS21	stripe
ENSG00000007062.7	PROM1	stripe
ENSG00000007080.6	CCDC124	stripe
ENSG00000007129.13	CEACAM21	stripe
ENSG00000007202.10	KIAA0100	stripe
ENSG00000007264.9	MATK	stripe
ENSG00000007312.8	CD79B	stripe
ENSG00000007314.7	SCN4A	stripe
ENSG00000007341.14	ST7L	stripe
ENSG00000007350.12	TKTL1	stripe
ENSG00000007384.11	RHBDF1	stripe
ENSG00000007392.12	LUC7L	stripe
ENSG00000007516.9	BAIAP3	stripe
ENSG00000007520.3	TSR3	stripe
ENSG00000007545.11	CRAMP1L	stripe
ENSG00000007866.14	TEAD3	stripe
ENSG00000007944.10	MYLIP	stripe
ENSG00000008083.9	JARID2	anchor
ENSG00000008086.6	CDKL5	stripe
ENSG00000008128.18	CDK11A	stripe
ENSG00000008130.11	NADK	stripe
ENSG00000008226.15	DLEC1	stripe
ENSG00000008256.11	CYTH3	stripe
ENSG00000008277.10	ADAM22	stripe
ENSG00000008282.3	SYPL1	stripe
ENSG00000008283.11	CYB561	stripe
ENSG00000008294.16	SPAG9	stripe
ENSG00000008300.10	CELSR3	stripe
ENSG00000008323.11	PLEKHG6	stripe
ENSG00000008324.6	SS18L2	stripe
ENSG00000008405.7	CRY1	stripe
ENSG00000008438.4	PGLYRP1	stripe
ENSG00000008441.12	NFIX	stripe
ENSG00000008513.10	ST3GAL1	stripe
ENSG00000008710.13	PKD1	stripe
ENSG00000008735.10	MAPK8IP2	anchor
ENSG00000008838.13	MED24	stripe
ENSG00000008853.12	RHOBTB2	stripe
ENSG00000008952.12	SEC62	stripe
ENSG00000009307.11	CSDE1	stripe
ENSG00000009413.11	REV3L	stripe
ENSG00000009765.10	IYD	stripe
ENSG00000009780.11	FAM76A	stripe
ENSG00000009844.11	VTA1	anchor
ENSG00000009950.11	MLXIPL	stripe
ENSG00000010017.9	RANBP9	stripe
ENSG00000010030.9	ETV7	stripe
ENSG00000010165.15	METTL13	stripe
ENSG00000010244.12	ZNF207	stripe
ENSG00000010256.6	UQCRC1	stripe
ENSG00000010270.9	STARD3NL	stripe
ENSG00000010278.7	CD9	stripe
ENSG00000010292.8	NCAPD2	stripe
ENSG00000010295.15	IFFO1	stripe
ENSG00000010310.4	GIPR	stripe
ENSG00000010319.2	SEMA3G	stripe
ENSG00000010322.11	NISCH	stripe
ENSG00000010327.6	STAB1	stripe
ENSG00000010361.9	FUZ	stripe
ENSG00000010539.7	ZNF200	stripe
ENSG00000010610.5	CD4	stripe
ENSG00000010626.10	LRRC23	stripe
ENSG00000010810.13	FYN	stripe
ENSG00000010818.4	HIVEP2	stripe
ENSG00000011083.4	SLC6A7	stripe
ENSG00000011132.7	APBA3	stripe
ENSG00000011143.12	MKS1	stripe
ENSG00000011198.3	ABHD5	stripe
ENSG00000011243.13	AKAP8L	stripe
ENSG00000011258.11	MBTD1	stripe
ENSG00000011260.9	UTP18	stripe
ENSG00000011275.14	RNF216	stripe
ENSG00000011304.12	PTBP1	stripe
ENSG00000011332.15	DPF1	stripe
ENSG00000011376.5	LARS2	stripe
ENSG00000011422.7	PLAUR	stripe
ENSG00000011451.13	WIZ	stripe
ENSG00000011454.12	RABGAP1	stripe
ENSG00000011478.7	QPCTL	stripe
ENSG00000011523.9	CEP68	stripe
ENSG00000011590.9	ZBTB32	stripe
ENSG00000011638.6	TMEM159	stripe
ENSG00000012048.15	BRCA1	stripe
ENSG00000012061.11	ERCC1	stripe
ENSG00000012223.8	LTF	stripe
ENSG00000012232.4	EXTL3	stripe
ENSG00000012983.7	MAP4K5	stripe
ENSG00000013016.10	EHD3	stripe
ENSG00000013297.6	CLDN11	stripe
ENSG00000013306.11	SLC25A39	anchor
ENSG00000013364.14	MVP	stripe
ENSG00000013375.11	PGM3	stripe
ENSG00000013392.6	RWDD2A	stripe
ENSG00000013441.11	CLK1	stripe
ENSG00000013523.5	ANGEL1	stripe
ENSG00000013563.9	DNASE1L1	stripe
ENSG00000013583.4	HEBP1	stripe
ENSG00000013588.5	GPRC5A	stripe
ENSG00000013725.10	CD6	stripe
ENSG00000014123.9	UFL1	stripe
ENSG00000014138.4	POLA2	stripe
ENSG00000014164.6	ZC3H3	stripe
ENSG00000014216.11	CAPN1	stripe
ENSG00000015133.14	CCDC88C	anchor
ENSG00000015413.5	DPEP1	stripe
ENSG00000015475.14	BID	stripe
ENSG00000015479.13	MATR3	stripe
ENSG00000015520.10	NPC1L1	stripe
ENSG00000015592.12	STMN4	stripe
ENSG00000015676.13	NUDCD3	stripe
ENSG00000016402.8	IL20RA	stripe
ENSG00000016490.11	CLCA1	stripe
ENSG00000016864.12	GLT8D1	stripe
ENSG00000017373.11	SRCIN1	stripe
ENSG00000017797.7	RALBP1	stripe
ENSG00000018625.10	ATP1A2	stripe
ENSG00000018699.7	TTC27	stripe
ENSG00000019144.12	PHLDB1	stripe
ENSG00000019169.9	MARCO	stripe
ENSG00000019186.5	CYP24A1	stripe
ENSG00000019485.8	PRDM11	anchor
ENSG00000019505.3	SYT13	stripe
ENSG00000019582.10	CD74	stripe
ENSG00000020129.11	NCDN	stripe
ENSG00000020181.13	GPR124	anchor
ENSG00000020256.15	ZFP64	stripe
ENSG00000020577.9	SAMD4A	anchor
ENSG00000020633.14	RUNX3	stripe
ENSG00000020922.8	MRE11A	stripe
ENSG00000021300.9	PLEKHB1	stripe
ENSG00000021355.8	SERPINB1	anchor
ENSG00000021762.15	OSBPL5	stripe
ENSG00000022567.5	SLC45A4	stripe
ENSG00000022840.11	RNF10	stripe
ENSG00000022976.11	ZNF839	anchor
ENSG00000023171.10	GRAMD1B	stripe
ENSG00000023191.12	RNH1	stripe
ENSG00000023318.7	ERP44	stripe
ENSG00000023330.10	ALAS1	stripe
ENSG00000023445.9	BIRC3	stripe
ENSG00000023572.4	GLRX2	stripe
ENSG00000023608.4	SNAPC1	stripe
ENSG00000023697.8	DERA	stripe
ENSG00000023734.6	STRAP	stripe
ENSG00000023892.9	DEF6	anchor
ENSG00000024048.6	UBR2	stripe
ENSG00000024422.7	EHD2	stripe
ENSG00000025039.10	RRAGD	stripe
ENSG00000025293.11	PHF20	stripe
ENSG00000025423.7	HSD17B6	stripe
ENSG00000025708.8	TYMP	stripe
ENSG00000025770.14	NCAPH2	stripe
ENSG00000025772.7	TOMM34	stripe
ENSG00000026025.9	VIM	stripe
ENSG00000026036.16	RTEL1-TNFRSF6B	stripe
ENSG00000026103.15	FAS	stripe
ENSG00000026297.11	RNASET2	stripe
ENSG00000026508.12	CD44	stripe
ENSG00000026652.9	AGPAT4	stripe
ENSG00000026751.12	SLAMF7	stripe
ENSG00000026950.12	BTN3A1	stripe
ENSG00000027001.7	MIPEP	stripe
ENSG00000027075.9	PRKCH	stripe
ENSG00000027697.8	IFNGR1	stripe
ENSG00000028137.12	TNFRSF1B	stripe
ENSG00000028203.13	VEZT	stripe
ENSG00000028277.16	POU2F2	stripe
ENSG00000028310.13	BRD9	stripe
ENSG00000028839.5	TBPL1	stripe
ENSG00000029364.7	SLC39A9	stripe
ENSG00000029534.15	ANK1	stripe
ENSG00000029559.5	IBSP	stripe
ENSG00000029639.6	TFB1M	stripe
ENSG00000029993.10	HMGB3	stripe
ENSG00000030066.9	NUP160	stripe
ENSG00000030110.8	BAK1	anchor
ENSG00000031003.6	FAM13B	stripe
ENSG00000031081.6	ARHGAP31	stripe
ENSG00000031544.10	NR2E3	stripe
ENSG00000031698.8	SARS	stripe
ENSG00000031823.10	RANBP3	stripe
ENSG00000032389.8	TSSC1	stripe
ENSG00000032444.11	PNPLA6	stripe
ENSG00000032742.13	IFT88	stripe
ENSG00000033030.9	ZCCHC8	stripe
ENSG00000033170.12	FUT8	anchor
ENSG00000033327.8	GAB2	stripe
ENSG00000033627.10	ATP6V0A1	stripe
ENSG00000033800.9	PIAS1	stripe
ENSG00000034053.10	APBA2	stripe
ENSG00000034063.9	UHRF1	stripe
ENSG00000034152.14	MAP2K3	stripe
ENSG00000034510.4	TMSB10	stripe
ENSG00000034677.7	RNF19A	stripe
ENSG00000034693.10	PEX3	stripe
ENSG00000034713.3	GABARAPL2	stripe
ENSG00000034971.10	MYOC	stripe
ENSG00000035141.3	FAM136A	stripe
ENSG00000035403.12	VCL	stripe
ENSG00000035664.7	DAPK2	anchor
ENSG00000035681.3	NSMAF	stripe
ENSG00000035687.9	ADSS	stripe
ENSG00000035862.8	TIMP2	stripe
ENSG00000035928.10	RFC1	stripe
ENSG00000036054.8	TBC1D23	stripe
ENSG00000036257.8	CUL3	stripe
ENSG00000036448.5	MYOM2	stripe
ENSG00000036530.4	CYP46A1	stripe
ENSG00000036549.8	ZZZ3	stripe
ENSG00000036565.10	SLC18A1	stripe
ENSG00000037042.8	TUBG2	stripe
ENSG00000037241.3	RPL26L1	anchor
ENSG00000037280.11	FLT4	stripe
ENSG00000037474.10	NSUN2	stripe
ENSG00000037637.6	FBXO42	stripe
ENSG00000037757.9	MRI1	stripe
ENSG00000037897.12	METTL1	stripe
ENSG00000037965.4	HOXC8	stripe
ENSG00000038358.10	EDC4	stripe
ENSG00000038532.10	CLEC16A	stripe
ENSG00000039068.14	CDH1	stripe
ENSG00000039123.11	SKIV2L2	stripe
ENSG00000039523.13	FAM65A	stripe
ENSG00000039560.9	RAI14	stripe
ENSG00000039600.6	SOX30	stripe
ENSG00000039650.5	PNKP	stripe
ENSG00000039987.2	BEST2	stripe
ENSG00000040341.13	STAU2	stripe
ENSG00000040487.8	PQLC2	stripe
ENSG00000040608.9	RTN4R	stripe
ENSG00000040633.8	PHF23	stripe
ENSG00000040933.11	INPP4A	stripe
ENSG00000041802.6	LSG1	stripe
ENSG00000041880.10	PARP3	stripe
ENSG00000041982.10	TNC	stripe
ENSG00000041988.11	THAP3	stripe
ENSG00000042286.10	AIFM2	stripe
ENSG00000042753.7	AP2S1	anchor
ENSG00000042832.7	TG	stripe
ENSG00000043143.16	PHF15	stripe
ENSG00000043355.6	ZIC2	stripe
ENSG00000043462.7	LCP2	stripe
ENSG00000043514.11	TRIT1	stripe
ENSG00000043591.4	ADRB1	stripe
ENSG00000044012.3	GUCA2B	anchor
ENSG00000044090.4	CUL7	stripe
ENSG00000044115.16	CTNNA1	stripe
ENSG00000044446.7	PHKA2	stripe
ENSG00000046651.10	OFD1	stripe
ENSG00000047346.8	FAM214A	stripe
ENSG00000047579.15	DTNBP1	stripe
ENSG00000047621.7	C12orf4	stripe
ENSG00000047662.4	FAM184B	stripe
ENSG00000047932.9	GOPC	stripe
ENSG00000048140.13	TSPAN17	stripe
ENSG00000048162.15	NOP16	stripe
ENSG00000048342.11	CC2D2A	stripe
ENSG00000048392.7	RRM2B	stripe
ENSG00000048405.5	ZNF800	stripe
ENSG00000048471.9	SNX29	stripe
ENSG00000048544.5	MRPS10	stripe
ENSG00000048545.9	GUCA1A	stripe
ENSG00000048707.9	VPS13D	stripe
ENSG00000048740.13	CELF2	stripe
ENSG00000048991.12	R3HDM1	stripe
ENSG00000049089.9	COL9A2	stripe
ENSG00000049167.9	ERCC8	stripe
ENSG00000049239.8	H6PD	stripe
ENSG00000049245.8	VAMP3	stripe
ENSG00000049246.10	PER3	stripe
ENSG00000049249.4	TNFRSF9	stripe
ENSG00000049283.13	EPN3	stripe
ENSG00000049323.11	LTBP1	stripe
ENSG00000049540.12	ELN	stripe
ENSG00000049541.6	RFC2	stripe
ENSG00000049618.17	ARID1B	stripe
ENSG00000049656.9	CLPTM1L	stripe
ENSG00000049759.12	NEDD4L	stripe
ENSG00000049860.9	HEXB	anchor
ENSG00000050130.13	JKAMP	stripe
ENSG00000050165.13	DKK3	stripe
ENSG00000050344.8	NFE2L3	stripe
ENSG00000050393.7	MCUR1	stripe
ENSG00000050405.9	LIMA1	stripe
ENSG00000050426.11	LETMD1	stripe
ENSG00000050438.12	SLC4A8	stripe
ENSG00000050555.13	LAMC3	stripe
ENSG00000050730.11	TNIP3	stripe
ENSG00000050767.11	COL23A1	stripe
ENSG00000050820.12	BCAR1	stripe
ENSG00000051009.6	FAM160A2	anchor
ENSG00000051108.10	HERPUD1	stripe
ENSG00000051180.12	RAD51	stripe
ENSG00000051382.4	PIK3CB	stripe
ENSG00000051523.6	CYBA	stripe
ENSG00000051596.5	THOC3	stripe
ENSG00000051825.10	MPHOSPH9	stripe
ENSG00000052344.11	PRSS8	stripe
ENSG00000052723.7	SIKE1	stripe
ENSG00000052802.8	MSMO1	stripe
ENSG00000053108.12	FSTL4	stripe
ENSG00000053254.11	FOXN3	anchor
ENSG00000053328.8	METTL24	stripe
ENSG00000053371.8	AKR7A2	stripe
ENSG00000053372.4	MRTO4	stripe
ENSG00000053438.7	NNAT	anchor
ENSG00000053501.8	USE1	stripe
ENSG00000053524.7	MCF2L2	stripe
ENSG00000053702.10	NRIP2	anchor
ENSG00000053747.11	LAMA3	stripe
ENSG00000053918.11	KCNQ1	stripe
ENSG00000054116.7	TRAPPC3	stripe
ENSG00000054118.9	THRAP3	stripe
ENSG00000054148.13	PHPT1	stripe
ENSG00000054179.7	ENTPD2	stripe
ENSG00000054219.9	LY75	stripe
ENSG00000054267.16	ARID4B	stripe
ENSG00000054277.8	OPN3	stripe
ENSG00000054523.12	KIF1B	stripe
ENSG00000054611.9	TBC1D22A	stripe
ENSG00000054654.11	SYNE2	stripe
ENSG00000054690.9	PLEKHH1	stripe
ENSG00000054965.6	FAM168A	stripe
ENSG00000054967.8	RELT	stripe
ENSG00000055070.12	SZRD1	stripe
ENSG00000055118.10	KCNH2	stripe
ENSG00000055130.11	CUL1	stripe
ENSG00000055163.14	CYFIP2	stripe
ENSG00000055208.13	TAB2	stripe
ENSG00000055211.8	GINM1	stripe
ENSG00000055483.15	USP36	stripe
ENSG00000055609.13	KMT2C	stripe
ENSG00000055917.11	PUM2	stripe
ENSG00000055950.12	MRPL43	stripe
ENSG00000055957.6	ITIH1	stripe
ENSG00000056097.11	ZFR	stripe
ENSG00000056558.6	TRAF1	stripe
ENSG00000056586.11	RC3H2	stripe
ENSG00000056972.14	TRAF3IP2	stripe
ENSG00000057019.11	DCBLD2	stripe
ENSG00000057252.8	SOAT1	stripe
ENSG00000057593.9	F7	stripe
ENSG00000057608.12	GDI2	stripe
ENSG00000057657.10	PRDM1	stripe
ENSG00000057663.8	ATG5	stripe
ENSG00000057704.6	TMCC3	stripe
ENSG00000057935.9	MTA3	stripe
ENSG00000058262.5	SEC61A1	stripe
ENSG00000058272.11	PPP1R12A	stripe
ENSG00000058404.15	CAMK2B	stripe
ENSG00000058453.12	CROCC	stripe
ENSG00000058600.11	POLR3E	anchor
ENSG00000058668.10	ATP2B4	stripe
ENSG00000058673.11	ZC3H11A	stripe
ENSG00000058799.9	YIPF1	stripe
ENSG00000058804.10	NDC1	stripe
ENSG00000059122.12	FLYWCH1	stripe
ENSG00000059145.14	UNKL	stripe
ENSG00000059377.11	TBXAS1	stripe
ENSG00000059378.8	PARP12	stripe
ENSG00000059588.5	TARBP1	anchor
ENSG00000059728.6	MXD1	anchor
ENSG00000059758.3	CDK17	anchor
ENSG00000059769.15	DNAJC25	stripe
ENSG00000059804.11	SLC2A3	stripe
ENSG00000059915.12	PSD	stripe
ENSG00000060069.12	CTDP1	stripe
ENSG00000060138.8	YBX3	stripe
ENSG00000060140.4	STYK1	stripe
ENSG00000060237.12	WNK1	stripe
ENSG00000060491.12	OGFR	stripe
ENSG00000060558.3	GNA15	stripe
ENSG00000060642.6	PIGV	anchor
ENSG00000060749.10	QSER1	anchor
ENSG00000060762.14	MPC1	stripe
ENSG00000060971.13	ACAA1	stripe
ENSG00000060982.10	BCAT1	stripe
ENSG00000061273.13	HDAC7	stripe
ENSG00000061337.11	LZTS1	stripe
ENSG00000061492.7	WNT8A	stripe
ENSG00000061656.5	SPAG4	stripe
ENSG00000061676.10	NCKAP1	stripe
ENSG00000061938.12	TNK2	stripe
ENSG00000061987.10	MON2	stripe
ENSG00000062038.9	CDH3	stripe
ENSG00000062194.11	GPBP1	stripe
ENSG00000062485.14	CS	stripe
ENSG00000062524.11	LTK	stripe
ENSG00000062598.13	ELMO2	stripe
ENSG00000062650.13	WAPAL	stripe
ENSG00000062716.6	VMP1	stripe
ENSG00000062725.5	APPBP2	stripe
ENSG00000062822.8	POLD1	stripe
ENSG00000063015.15	SEZ6	stripe
ENSG00000063046.13	EIF4B	stripe
ENSG00000063127.11	SLC6A16	stripe
ENSG00000063169.6	GLTSCR1	stripe
ENSG00000063176.11	SPHK2	stripe
ENSG00000063177.8	RPL18	stripe
ENSG00000063180.4	CA11	anchor
ENSG00000063241.3	ISOC2	stripe
ENSG00000063322.9	MED29	stripe
ENSG00000063438.12	AHRR	anchor
ENSG00000063515.2	GSC2	stripe
ENSG00000063587.12	ZNF275	stripe
ENSG00000063761.11	ADCK1	stripe
ENSG00000063854.8	HAGH	stripe
ENSG00000063978.11	RNF4	stripe
ENSG00000064012.17	CASP8	stripe
ENSG00000064102.10	ASUN	stripe
ENSG00000064115.6	TM7SF3	stripe
ENSG00000064195.7	DLX3	anchor
ENSG00000064201.11	TSPAN32	stripe
ENSG00000064205.6	WISP2	stripe
ENSG00000064218.4	DMRT3	stripe
ENSG00000064225.8	ST3GAL6	stripe
ENSG00000064270.8	ATP2C2	stripe
ENSG00000064313.7	TAF2	stripe
ENSG00000064393.11	HIPK2	stripe
ENSG00000064419.9	TNPO3	stripe
ENSG00000064490.9	RFXANK	stripe
ENSG00000064545.10	TMEM161A	stripe
ENSG00000064547.9	LPAR2	stripe
ENSG00000064601.12	CTSA	stripe
ENSG00000064651.9	SLC12A2	stripe
ENSG00000064666.10	CNN2	stripe
ENSG00000064687.8	ABCA7	stripe
ENSG00000064726.5	BTBD1	stripe
ENSG00000064787.8	BCAS1	anchor
ENSG00000064932.11	SBNO2	stripe
ENSG00000064995.12	TAF11	stripe
ENSG00000064999.12	ANKS1A	stripe
ENSG00000065054.9	SLC9A3R2	stripe
ENSG00000065057.3	NTHL1	stripe
ENSG00000065135.7	GNAI3	anchor
ENSG00000065154.7	OAT	stripe
ENSG00000065268.6	WDR18	stripe
ENSG00000065308.4	TRAM2	stripe
ENSG00000065320.4	NTN1	stripe
ENSG00000065357.15	DGKA	stripe
ENSG00000065361.10	ERBB3	stripe
ENSG00000065413.12	ANKRD44	stripe
ENSG00000065427.10	KARS	stripe
ENSG00000065457.6	ADAT1	stripe
ENSG00000065485.13	PDIA5	stripe
ENSG00000065491.8	TBC1D22B	stripe
ENSG00000065518.7	NDUFB4	anchor
ENSG00000065526.6	SPEN	stripe
ENSG00000065600.8	TMEM206	stripe
ENSG00000065613.9	SLK	stripe
ENSG00000065618.12	COL17A1	stripe
ENSG00000065621.10	GSTO2	stripe
ENSG00000065675.10	PRKCQ	stripe
ENSG00000065717.10	TLE2	stripe
ENSG00000065809.9	FAM107B	stripe
ENSG00000065833.7	ME1	stripe
ENSG00000065882.11	TBC1D1	stripe
ENSG00000065911.7	MTHFD2	stripe
ENSG00000065970.4	FOXJ2	stripe
ENSG00000065978.13	YBX1	stripe
ENSG00000065989.11	PDE4A	stripe
ENSG00000066027.7	PPP2R5A	stripe
ENSG00000066044.9	ELAVL1	stripe
ENSG00000066056.9	TIE1	stripe
ENSG00000066117.10	SMARCD1	stripe
ENSG00000066135.8	KDM4A	stripe
ENSG00000066136.15	NFYC	stripe
ENSG00000066185.8	ZMYND12	stripe
ENSG00000066230.6	SLC9A3	stripe
ENSG00000066248.10	NGEF	stripe
ENSG00000066294.10	CD84	stripe
ENSG00000066322.8	ELOVL1	stripe
ENSG00000066336.7	SPI1	stripe
ENSG00000066379.10	ZNRD1	stripe
ENSG00000066422.4	ZBTB11	stripe
ENSG00000066427.17	ATXN3	stripe
ENSG00000066629.12	EML1	stripe
ENSG00000066654.8	THUMPD1	stripe
ENSG00000066739.7	ATG2B	stripe
ENSG00000066777.4	ARFGEF1	stripe
ENSG00000066855.11	MTFR1	anchor
ENSG00000066923.13	STAG3	stripe
ENSG00000066926.6	FECH	stripe
ENSG00000066933.11	MYO9A	stripe
ENSG00000067066.12	SP100	stripe
ENSG00000067082.10	KLF6	anchor
ENSG00000067141.12	NEO1	stripe
ENSG00000067167.3	TRAM1	stripe
ENSG00000067182.3	TNFRSF1A	stripe
ENSG00000067191.11	CACNB1	stripe
ENSG00000067208.10	EVI5	stripe
ENSG00000067225.13	PKM	stripe
ENSG00000067248.5	DHX29	stripe
ENSG00000067365.10	METTL22	stripe
ENSG00000067369.9	TP53BP1	stripe
ENSG00000067560.6	RHOA	stripe
ENSG00000067596.6	DHX8	anchor
ENSG00000067606.11	PRKCZ	stripe
ENSG00000067829.14	IDH3G	stripe
ENSG00000067836.8	ROGDI	stripe
ENSG00000067840.8	PDZD4	stripe
ENSG00000067842.13	ATP2B3	stripe
ENSG00000067955.9	CBFB	stripe
ENSG00000068024.12	HDAC4	stripe
ENSG00000068079.3	IFI35	stripe
ENSG00000068120.10	COASY	stripe
ENSG00000068137.10	PLEKHH3	stripe
ENSG00000068305.13	MEF2A	stripe
ENSG00000068383.14	INPP5A	stripe
ENSG00000068615.12	REEP1	stripe
ENSG00000068650.14	ATP11A	stripe
ENSG00000068654.11	POLR1A	stripe
ENSG00000068697.6	LAPTM4A	stripe
ENSG00000068885.10	IFT80	stripe
ENSG00000068903.15	SIRT2	stripe
ENSG00000068971.9	PPP2R5B	stripe
ENSG00000069188.12	SDK2	stripe
ENSG00000069248.9	NUP133	stripe
ENSG00000069275.12	NUCKS1	stripe
ENSG00000069345.7	DNAJA2	stripe
ENSG00000069482.6	GAL	stripe
ENSG00000069493.10	CLEC2D	stripe
ENSG00000069509.5	FUNDC1	stripe
ENSG00000069696.6	DRD4	stripe
ENSG00000069712.9	KIAA1107	stripe
ENSG00000069812.7	HES2	anchor
ENSG00000069849.6	ATP1B3	stripe
ENSG00000069869.11	NEDD4	stripe
ENSG00000069956.7	MAPK6	stripe
ENSG00000069966.14	GNB5	stripe
ENSG00000069998.8	CECR5	stripe
ENSG00000070010.14	UFD1L	stripe
ENSG00000070018.4	LRP6	stripe
ENSG00000070019.3	GUCY2C	stripe
ENSG00000070031.3	SCT	stripe
ENSG00000070047.7	PHRF1	stripe
ENSG00000070087.9	PFN2	stripe
ENSG00000070182.13	SPTB	stripe
ENSG00000070190.8	DAPP1	stripe
ENSG00000070214.11	SLC44A1	stripe
ENSG00000070269.9	TMEM260	anchor
ENSG00000070371.11	CLTCL1	stripe
ENSG00000070388.7	FGF22	stripe
ENSG00000070404.5	FSTL3	stripe
ENSG00000070413.14	DGCR2	stripe
ENSG00000070423.13	RNF126	stripe
ENSG00000070501.7	POLB	stripe
ENSG00000070526.10	ST6GALNAC1	stripe
ENSG00000070540.8	WIPI1	anchor
ENSG00000070614.10	NDST1	stripe
ENSG00000070718.7	AP3M2	stripe
ENSG00000070729.9	CNGB1	stripe
ENSG00000070731.5	ST6GALNAC2	stripe
ENSG00000070756.9	PABPC1	stripe
ENSG00000070759.12	TESK2	stripe
ENSG00000070761.3	C16orf80	stripe
ENSG00000070770.4	CSNK2A2	stripe
ENSG00000070785.12	EIF2B3	stripe
ENSG00000070808.11	CAMK2A	stripe
ENSG00000070814.13	TCOF1	stripe
ENSG00000070882.8	OSBPL3	stripe
ENSG00000070915.5	SLC12A3	anchor
ENSG00000070961.10	ATP2B1	stripe
ENSG00000070985.9	TRPM5	anchor
ENSG00000071051.9	NCK2	stripe
ENSG00000071054.11	MAP4K4	stripe
ENSG00000071073.8	MGAT4A	stripe
ENSG00000071082.6	RPL31	stripe
ENSG00000071127.12	WDR1	stripe
ENSG00000071203.5	MS4A12	stripe
ENSG00000071205.7	ARHGAP10	stripe
ENSG00000071242.7	RPS6KA2	stripe
ENSG00000071246.6	VASH1	stripe
ENSG00000071462.7	WBSCR22	stripe
ENSG00000071539.9	TRIP13	stripe
ENSG00000071553.12	ATP6AP1	stripe
ENSG00000071564.10	TCF3	stripe
ENSG00000071575.7	TRIB2	stripe
ENSG00000071655.13	MBD3	stripe
ENSG00000071677.1	PRLH	anchor
ENSG00000071794.11	HLTF	stripe
ENSG00000071859.10	FAM50A	stripe
ENSG00000071889.12	FAM3A	anchor
ENSG00000071894.10	CPSF1	stripe
ENSG00000071909.14	MYO3B	stripe
ENSG00000072042.8	RDH11	stripe
ENSG00000072062.9	PRKACA	stripe
ENSG00000072071.12	LPHN1	stripe
ENSG00000072080.6	SPP2	stripe
ENSG00000072110.9	ACTN1	stripe
ENSG00000072182.8	ASIC4	stripe
ENSG00000072195.10	SPEG	stripe
ENSG00000072201.9	LNX1	stripe
ENSG00000072274.8	TFRC	stripe
ENSG00000072310.12	SREBF1	stripe
ENSG00000072364.8	AFF4	stripe
ENSG00000072401.10	UBE2D1	stripe
ENSG00000072415.4	MPP5	stripe
ENSG00000072518.16	MARK2	stripe
ENSG00000072609.13	CHFR	stripe
ENSG00000072682.14	P4HA2	stripe
ENSG00000072736.14	NFATC3	stripe
ENSG00000072778.15	ACADVL	stripe
ENSG00000072786.8	STK10	stripe
ENSG00000072803.13	FBXW11	stripe
ENSG00000072818.7	ACAP1	stripe
ENSG00000072864.8	NDE1	stripe
ENSG00000072952.14	MRVI1	stripe
ENSG00000072958.4	AP1M1	stripe
ENSG00000073009.8	IKBKG	anchor
ENSG00000073050.7	XRCC1	stripe
ENSG00000073060.11	SCARB1	stripe
ENSG00000073067.9	CYP2W1	anchor
ENSG00000073111.9	MCM2	stripe
ENSG00000073146.11	MOV10L1	stripe
ENSG00000073150.9	PANX2	stripe
ENSG00000073169.9	SELO	stripe
ENSG00000073331.13	ALPK1	stripe
ENSG00000073350.9	LLGL2	stripe
ENSG00000073417.10	PDE8A	stripe
ENSG00000073536.13	NLE1	stripe
ENSG00000073584.14	SMARCE1	stripe
ENSG00000073598.5	FNDC8	anchor
ENSG00000073605.14	GSDMB	stripe
ENSG00000073614.7	KDM5A	stripe
ENSG00000073711.6	PPP2R3A	stripe
ENSG00000073849.10	ST6GAL1	stripe
ENSG00000073910.15	FRY	anchor
ENSG00000073921.13	PICALM	stripe
ENSG00000074054.13	CLASP1	stripe
ENSG00000074071.9	MRPS34	stripe
ENSG00000074181.4	NOTCH3	stripe
ENSG00000074219.9	TEAD2	stripe
ENSG00000074266.13	EED	stripe
ENSG00000074276.6	CDHR2	stripe
ENSG00000074317.6	SNCB	stripe
ENSG00000074319.8	TSG101	stripe
ENSG00000074356.12	C17orf85	stripe
ENSG00000074370.13	ATP2A3	stripe
ENSG00000074410.9	CA12	stripe
ENSG00000074416.9	MGLL	stripe
ENSG00000074660.11	SCARF1	anchor
ENSG00000074706.9	IPCEF1	stripe
ENSG00000074771.3	NOX3	stripe
ENSG00000074855.6	ANO8	stripe
ENSG00000074964.12	ARHGEF10L	stripe
ENSG00000074966.6	TXK	stripe
ENSG00000075073.10	TACR2	stripe
ENSG00000075142.9	SRI	stripe
ENSG00000075151.15	EIF4G3	stripe
ENSG00000075218.14	GTSE1	anchor
ENSG00000075234.12	TTC38	stripe
ENSG00000075239.9	ACAT1	stripe
ENSG00000075240.12	GRAMD4	anchor
ENSG00000075275.12	CELSR1	stripe
ENSG00000075292.14	ZNF638	stripe
ENSG00000075303.8	SLC25A40	stripe
ENSG00000075388.2	FGF4	stripe
ENSG00000075399.8	VPS9D1	stripe
ENSG00000075407.13	ZNF37A	stripe
ENSG00000075420.8	FNDC3B	anchor
ENSG00000075426.7	FOSL2	stripe
ENSG00000075539.9	FRYL	stripe
ENSG00000075568.12	TMEM131	stripe
ENSG00000075618.13	FSCN1	stripe
ENSG00000075624.9	ACTB	stripe
ENSG00000075711.16	DLG1	stripe
ENSG00000075790.6	BCAP29	stripe
ENSG00000075856.7	SART3	stripe
ENSG00000075891.17	PAX2	stripe
ENSG00000075914.8	EXOSC7	stripe
ENSG00000075975.11	MKRN2	stripe
ENSG00000076003.4	MCM6	stripe
ENSG00000076043.5	REXO2	stripe
ENSG00000076053.6	RBM7	stripe
ENSG00000076067.7	RBMS2	anchor
ENSG00000076108.7	BAZ2A	stripe
ENSG00000076201.10	PTPN23	stripe
ENSG00000076248.6	UNG	anchor
ENSG00000076321.6	KLHL20	stripe
ENSG00000076344.11	RGS11	stripe
ENSG00000076356.6	PLXNA2	stripe
ENSG00000076554.11	TPD52	anchor
ENSG00000076604.10	TRAF4	stripe
ENSG00000076641.4	PAG1	stripe
ENSG00000076662.5	ICAM3	stripe
ENSG00000076685.14	NT5C2	stripe
ENSG00000076706.10	MCAM	stripe
ENSG00000076770.10	MBNL3	stripe
ENSG00000076826.5	CAMSAP3	stripe
ENSG00000076864.15	RAP1GAP	stripe
ENSG00000076924.7	XAB2	stripe
ENSG00000076944.10	STXBP2	stripe
ENSG00000076984.13	MAP2K7	stripe
ENSG00000077044.5	DGKD	stripe
ENSG00000077080.5	ACTL6B	stripe
ENSG00000077150.13	NFKB2	stripe
ENSG00000077152.5	UBE2T	stripe
ENSG00000077157.16	PPP1R12B	stripe
ENSG00000077232.12	DNAJC10	stripe
ENSG00000077254.10	USP33	stripe
ENSG00000077312.4	SNRPA	stripe
ENSG00000077327.11	SPAG6	stripe
ENSG00000077348.4	EXOSC5	stripe
ENSG00000077380.11	DYNC1I2	stripe
ENSG00000077420.11	APBB1IP	stripe
ENSG00000077454.11	LRCH4	stripe
ENSG00000077522.8	ACTN2	stripe
ENSG00000077549.13	CAPZB	stripe
ENSG00000077585.9	GPR137B	stripe
ENSG00000077684.11	PHF17	stripe
ENSG00000077809.8	GTF2I	stripe
ENSG00000077935.12	SMC1B	stripe
ENSG00000077942.13	FBLN1	stripe
ENSG00000077984.4	CST7	stripe
ENSG00000078053.12	AMPH	stripe
ENSG00000078070.7	MCCC1	anchor
ENSG00000078081.3	LAMP3	stripe
ENSG00000078114.14	NEBL	stripe
ENSG00000078237.4	C12orf5	stripe
ENSG00000078246.11	TULP3	stripe
ENSG00000078269.9	SYNJ2	stripe
ENSG00000078304.15	PPP2R5C	anchor
ENSG00000078369.13	GNB1	stripe
ENSG00000078403.12	MLLT10	stripe
ENSG00000078487.13	ZCWPW1	stripe
ENSG00000078668.9	VDAC3	anchor
ENSG00000078687.12	TNRC6C	stripe
ENSG00000078699.17	CBFA2T2	stripe
ENSG00000078747.8	ITCH	stripe
ENSG00000078804.8	TP53INP2	stripe
ENSG00000078808.12	SDF4	stripe
ENSG00000078898.6	BPIFB2	stripe
ENSG00000078902.11	TOLLIP	stripe
ENSG00000079112.5	CDH17	stripe
ENSG00000079134.7	THOC1	stripe
ENSG00000079246.11	XRCC5	stripe
ENSG00000079257.3	LXN	stripe
ENSG00000079263.14	SP140	stripe
ENSG00000079277.15	MKNK1	stripe
ENSG00000079332.10	SAR1A	stripe
ENSG00000079335.13	CDC14A	stripe
ENSG00000079337.11	RAPGEF3	stripe
ENSG00000079387.9	SENP1	stripe
ENSG00000079393.16	DUSP13	stripe
ENSG00000079432.3	CIC	stripe
ENSG00000079435.5	LIPE	stripe
ENSG00000079459.8	FDFT1	stripe
ENSG00000079462.3	PAFAH1B3	stripe
ENSG00000079616.8	KIF22	stripe
ENSG00000079739.11	PGM1	stripe
ENSG00000079819.12	EPB41L2	stripe
ENSG00000079999.9	KEAP1	stripe
ENSG00000080031.5	PTPRH	stripe
ENSG00000080189.10	SLC35C2	stripe
ENSG00000080200.5	CRYBG3	stripe
ENSG00000080298.11	RFX3	stripe
ENSG00000080371.4	RAB21	stripe
ENSG00000080503.15	SMARCA2	stripe
ENSG00000080511.2	RDH8	stripe
ENSG00000080546.9	SESN1	stripe
ENSG00000080561.9	MID2	stripe
ENSG00000080573.6	COL5A3	stripe
ENSG00000080603.12	SRCAP	stripe
ENSG00000080608.9	KIAA0020	anchor
ENSG00000080618.9	CPB2	stripe
ENSG00000080815.14	PSEN1	stripe
ENSG00000080819.2	CPOX	stripe
ENSG00000080822.12	CLDND1	stripe
ENSG00000080823.17	MOK	anchor
ENSG00000080824.14	HSP90AA1	stripe
ENSG00000080839.7	RBL1	stripe
ENSG00000080854.10	IGSF9B	stripe
ENSG00000080986.8	NDC80	anchor
ENSG00000081014.6	AP4E1	anchor
ENSG00000081019.9	RSBN1	stripe
ENSG00000081026.14	MAGI3	stripe
ENSG00000081052.10	COL4A4	stripe
ENSG00000081059.15	TCF7	stripe
ENSG00000081087.10	OSTM1	stripe
ENSG00000081154.7	PCNP	stripe
ENSG00000081181.3	ARG2	stripe
ENSG00000081237.14	PTPRC	stripe
ENSG00000081320.6	STK17B	stripe
ENSG00000081377.12	CDC14B	stripe
ENSG00000081665.9	ZNF506	stripe
ENSG00000081692.8	JMJD4	stripe
ENSG00000081721.7	DUSP12	stripe
ENSG00000081870.7	HSPB11	stripe
ENSG00000081913.9	PHLPP1	stripe
ENSG00000081923.6	ATP8B1	stripe
ENSG00000081985.6	IL12RB2	stripe
ENSG00000082074.11	FYB	stripe
ENSG00000082126.13	MPP4	stripe
ENSG00000082146.8	STRADB	stripe
ENSG00000082153.13	BZW1	stripe
ENSG00000082213.13	C5orf22	stripe
ENSG00000082258.8	CCNT2	anchor
ENSG00000082512.10	TRAF5	anchor
ENSG00000082515.12	MRPL22	stripe
ENSG00000082516.8	GEMIN5	stripe
ENSG00000082641.11	NFE2L1	stripe
ENSG00000082684.10	SEMA5B	stripe
ENSG00000082781.7	ITGB5	stripe
ENSG00000082805.15	ERC1	stripe
ENSG00000082898.12	XPO1	stripe
ENSG00000083093.5	PALB2	stripe
ENSG00000083097.10	DOPEY1	stripe
ENSG00000083099.6	LYRM2	stripe
ENSG00000083168.5	KAT6A	stripe
ENSG00000083307.6	GRHL2	stripe
ENSG00000083457.7	ITGAE	stripe
ENSG00000083635.7	NUFIP1	stripe
ENSG00000083799.13	CYLD	stripe
ENSG00000083814.8	ZNF671	stripe
ENSG00000083817.8	ZNF416	stripe
ENSG00000083828.11	ZNF586	stripe
ENSG00000083844.6	ZNF264	stripe
ENSG00000084070.7	SMAP2	stripe
ENSG00000084072.12	PPIE	stripe
ENSG00000084073.4	ZMPSTE24	stripe
ENSG00000084090.9	STARD7	stripe
ENSG00000084110.6	HAL	stripe
ENSG00000084112.10	SSH1	stripe
ENSG00000084234.12	APLP2	stripe
ENSG00000084444.9	KIAA1467	stripe
ENSG00000084463.3	WBP11	stripe
ENSG00000084636.13	COL16A1	stripe
ENSG00000084676.11	NCOA1	stripe
ENSG00000084693.11	AGBL5	stripe
ENSG00000084731.9	KIF3C	stripe
ENSG00000084733.6	RAB10	stripe
ENSG00000084734.4	GCKR	stripe
ENSG00000084764.6	MAPRE3	anchor
ENSG00000084774.9	CAD	stripe
ENSG00000085063.10	CD59	stripe
ENSG00000085117.7	CD82	stripe
ENSG00000085231.9	TAF9	stripe
ENSG00000085265.6	FCN1	stripe
ENSG00000085433.11	WDR47	stripe
ENSG00000085449.10	WDFY1	stripe
ENSG00000085465.11	OVGP1	stripe
ENSG00000085491.11	SLC25A24	anchor
ENSG00000085511.15	MAP3K4	stripe
ENSG00000085514.11	PILRA	stripe
ENSG00000085552.12	IGSF9	anchor
ENSG00000085662.9	AKR1B1	stripe
ENSG00000085721.8	RRN3	stripe
ENSG00000085741.8	WNT11	stripe
ENSG00000085760.10	MTIF2	stripe
ENSG00000085788.9	DDHD2	stripe
ENSG00000085831.11	TTC39A	stripe
ENSG00000085840.8	ORC1	stripe
ENSG00000085978.17	ATG16L1	stripe
ENSG00000085998.9	POMGNT1	stripe
ENSG00000085999.7	RAD54L	stripe
ENSG00000086102.14	NFX1	stripe
ENSG00000086159.8	AQP6	anchor
ENSG00000086232.8	EIF2AK1	stripe
ENSG00000086300.11	SNX10	stripe
ENSG00000086475.10	SEPHS1	stripe
ENSG00000086506.2	HBQ1	stripe
ENSG00000086544.2	ITPKC	stripe
ENSG00000086589.7	RBM22	stripe
ENSG00000086598.6	TMED2	anchor
ENSG00000086619.9	ERO1LB	stripe
ENSG00000086666.14	ZFAND6	stripe
ENSG00000086717.14	PPEF1	stripe
ENSG00000086730.12	LAT2	stripe
ENSG00000086758.11	HUWE1	stripe
ENSG00000086967.9	MYBPC2	stripe
ENSG00000087053.14	MTMR2	stripe
ENSG00000087074.7	PPP1R15A	stripe
ENSG00000087076.4	HSD17B14	stripe
ENSG00000087085.9	ACHE	anchor
ENSG00000087086.9	FTL	anchor
ENSG00000087088.15	BAX	stripe
ENSG00000087116.9	ADAMTS2	stripe
ENSG00000087152.11	ATXN7L3	stripe
ENSG00000087157.14	PGS1	stripe
ENSG00000087191.8	PSMC5	stripe
ENSG00000087206.12	UIMC1	stripe
ENSG00000087237.6	CETP	anchor
ENSG00000087250.4	MT3	stripe
ENSG00000087263.12	OGFOD1	stripe
ENSG00000087266.11	SH3BP2	stripe
ENSG00000087269.11	NOP14	stripe
ENSG00000087274.12	ADD1	stripe
ENSG00000087299.7	L2HGDH	stripe
ENSG00000087301.4	TXNDC16	anchor
ENSG00000087302.4	C14orf166	stripe
ENSG00000087338.4	GMCL1	stripe
ENSG00000087365.10	SF3B2	stripe
ENSG00000087460.19	GNAS	stripe
ENSG00000087903.8	RFX2	stripe
ENSG00000088002.7	SULT2B1	stripe
ENSG00000088035.11	ALG6	stripe
ENSG00000088038.13	CNOT3	stripe
ENSG00000088179.4	PTPN4	stripe
ENSG00000088247.11	KHSRP	stripe
ENSG00000088256.4	GNA11	stripe
ENSG00000088305.14	DNMT3B	anchor
ENSG00000088325.11	TPX2	anchor
ENSG00000088356.4	PDRG1	stripe
ENSG00000088387.13	DOCK9	stripe
ENSG00000088682.9	COQ9	stripe
ENSG00000088727.8	KIF9	stripe
ENSG00000088766.7	CRLS1	stripe
ENSG00000088808.12	PPP1R13B	stripe
ENSG00000088826.13	SMOX	stripe
ENSG00000088832.10	FKBP1A	stripe
ENSG00000088833.13	NSFL1C	stripe
ENSG00000088836.8	SLC4A11	stripe
ENSG00000088881.16	EBF4	stripe
ENSG00000088882.7	CPXM1	stripe
ENSG00000088888.13	MAVS	stripe
ENSG00000088899.10	LZTS3	stripe
ENSG00000088930.6	XRN2	stripe
ENSG00000088970.11	PLK1S1	stripe
ENSG00000088986.6	DYNLL1	stripe
ENSG00000088992.13	TESC	stripe
ENSG00000089012.10	SIRPG	stripe
ENSG00000089041.12	P2RX7	stripe
ENSG00000089053.8	ANAPC5	stripe
ENSG00000089057.10	SLC23A2	stripe
ENSG00000089060.7	SLC8B1	stripe
ENSG00000089094.12	KDM2B	stripe
ENSG00000089123.11	TASP1	stripe
ENSG00000089127.8	OAS1	anchor
ENSG00000089195.10	TRMT6	stripe
ENSG00000089199.5	CHGB	stripe
ENSG00000089220.4	PEBP1	stripe
ENSG00000089248.6	ERP29	stripe
ENSG00000089280.14	FUS	stripe
ENSG00000089335.16	ZNF302	stripe
ENSG00000089351.10	GRAMD1A	stripe
ENSG00000089472.12	HEPH	stripe
ENSG00000089486.12	CDIP1	stripe
ENSG00000089505.13	CMTM1	stripe
ENSG00000089558.4	KCNH4	stripe
ENSG00000089597.12	GANAB	stripe
ENSG00000089639.6	GMIP	anchor
ENSG00000089685.10	BIRC5	stripe
ENSG00000089692.4	LAG3	stripe
ENSG00000089693.6	MLF2	stripe
ENSG00000089723.5	OTUB2	stripe
ENSG00000089737.11	DDX24	stripe
ENSG00000089775.7	ZBTB25	stripe
ENSG00000089818.12	NECAP1	stripe
ENSG00000089820.11	ARHGAP4	stripe
ENSG00000090006.13	LTBP4	stripe
ENSG00000090013.5	BLVRB	stripe
ENSG00000090020.6	SLC9A1	stripe
ENSG00000090060.13	PAPOLA	stripe
ENSG00000090104.7	RGS1	stripe
ENSG00000090238.7	YPEL3	stripe
ENSG00000090263.11	MRPS33	anchor
ENSG00000090266.8	NDUFB2	stripe
ENSG00000090316.11	MAEA	stripe
ENSG00000090339.4	ICAM1	stripe
ENSG00000090372.10	STRN4	stripe
ENSG00000090382.2	LYZ	stripe
ENSG00000090432.5	MUL1	stripe
ENSG00000090447.7	TFAP4	stripe
ENSG00000090487.6	SPG21	stripe
ENSG00000090512.7	FETUB	stripe
ENSG00000090520.6	DNAJB11	stripe
ENSG00000090554.8	FLT3LG	stripe
ENSG00000090581.5	GNPTG	stripe
ENSG00000090612.16	ZNF268	stripe
ENSG00000090615.8	GOLGA3	stripe
ENSG00000090621.9	PABPC4	stripe
ENSG00000090659.13	CD209	stripe
ENSG00000090661.7	CERS4	stripe
ENSG00000090674.11	MCOLN1	stripe
ENSG00000090686.11	USP48	stripe
ENSG00000090776.5	EFNB1	anchor
ENSG00000090861.11	AARS	stripe
ENSG00000090905.13	TNRC6A	stripe
ENSG00000090924.10	PLEKHG2	stripe
ENSG00000090932.6	DLL3	stripe
ENSG00000090971.4	NAT14	stripe
ENSG00000090975.8	PITPNM2	stripe
ENSG00000091039.12	OSBPL8	stripe
ENSG00000091106.14	NLRC4	stripe
ENSG00000091127.9	PUS7	stripe
ENSG00000091137.7	SLC26A4	stripe
ENSG00000091138.8	SLC26A3	stripe
ENSG00000091317.7	CMTM6	stripe
ENSG00000091409.10	ITGA6	stripe
ENSG00000091428.13	RAPGEF4	stripe
ENSG00000091436.12	MLTK	stripe
ENSG00000091513.10	TF	stripe
ENSG00000091536.12	MYO15A	stripe
ENSG00000091583.6	APOH	anchor
ENSG00000091640.3	SPAG7	stripe
ENSG00000091704.5	CPA1	stripe
ENSG00000091831.17	ESR1	stripe
ENSG00000091972.14	CD200	stripe
ENSG00000091986.11	CCDC80	stripe
ENSG00000092010.10	PSME1	stripe
ENSG00000092020.6	PPP2R3C	anchor
ENSG00000092036.12	HAUS4	stripe
ENSG00000092051.12	JPH4	stripe
ENSG00000092054.12	MYH7	stripe
ENSG00000092067.5	CEBPE	anchor
ENSG00000092068.14	SLC7A8	stripe
ENSG00000092094.6	OSGEP	stripe
ENSG00000092096.10	SLC22A17	stripe
ENSG00000092098.12	RNF31	stripe
ENSG00000092148.8	HECTD1	stripe
ENSG00000092199.13	HNRNPC	stripe
ENSG00000092200.8	RPGRIP1	stripe
ENSG00000092201.5	SUPT16H	stripe
ENSG00000092203.9	TOX4	stripe
ENSG00000092295.7	TGM1	stripe
ENSG00000092330.11	TINF2	stripe
ENSG00000092439.9	TRPM7	stripe
ENSG00000092445.7	TYRO3	stripe
ENSG00000092758.11	COL9A3	stripe
ENSG00000092820.13	EZR	stripe
ENSG00000092841.14	MYL6	stripe
ENSG00000092850.7	TEKT2	anchor
ENSG00000092853.9	CLSPN	stripe
ENSG00000092871.12	RFFL	stripe
ENSG00000092929.7	UNC13D	stripe
ENSG00000093000.14	NUP50	stripe
ENSG00000093009.5	CDC45	stripe
ENSG00000093072.11	CECR1	stripe
ENSG00000093144.14	ECHDC1	stripe
ENSG00000093183.9	SEC22C	stripe
ENSG00000093217.5	XYLB	stripe
ENSG00000094661.2	OR1I1	stripe
ENSG00000094796.4	KRT31	stripe
ENSG00000094804.5	CDC6	anchor
ENSG00000094880.6	CDC23	stripe
ENSG00000094914.8	AAAS	stripe
ENSG00000094916.9	CBX5	stripe
ENSG00000094975.9	SUCO	stripe
ENSG00000095015.5	MAP3K1	stripe
ENSG00000095059.11	DHPS	stripe
ENSG00000095139.9	ARCN1	stripe
ENSG00000095261.9	PSMD5	stripe
ENSG00000095303.10	PTGS1	stripe
ENSG00000095319.10	NUP188	stripe
ENSG00000095321.12	CRAT	stripe
ENSG00000095370.15	SH2D3C	stripe
ENSG00000095380.10	NANS	stripe
ENSG00000095383.15	TBC1D2	anchor
ENSG00000095397.9	DFNB31	stripe
ENSG00000095485.12	CWF19L1	stripe
ENSG00000095539.11	SEMA4G	stripe
ENSG00000095564.9	BTAF1	anchor
ENSG00000095574.7	IKZF5	stripe
ENSG00000095585.12	BLNK	stripe
ENSG00000095596.7	CYP26A1	stripe
ENSG00000095752.2	IL11	stripe
ENSG00000095787.17	WAC	stripe
ENSG00000095794.15	CREM	stripe
ENSG00000095906.12	NUBP2	stripe
ENSG00000095932.5	C19orf77	stripe
ENSG00000095970.12	TREM2	stripe
ENSG00000096060.10	FKBP5	anchor
ENSG00000096070.15	BRPF3	stripe
ENSG00000096092.5	TMEM14A	anchor
ENSG00000096093.10	EFHC1	stripe
ENSG00000096264.9	NCR2	stripe
ENSG00000096395.6	MLN	stripe
ENSG00000096433.6	ITPR3	stripe
ENSG00000096654.11	ZNF184	stripe
ENSG00000096696.9	DSP	stripe
ENSG00000096717.7	SIRT1	stripe
ENSG00000096968.8	JAK2	anchor
ENSG00000096996.11	IL12RB1	stripe
ENSG00000097021.15	ACOT7	stripe
ENSG00000097033.10	SH3GLB1	stripe
ENSG00000097096.8	SYDE2	stripe
ENSG00000099204.14	ABLIM1	stripe
ENSG00000099219.9	ERMP1	stripe
ENSG00000099246.12	RAB18	stripe
ENSG00000099250.13	NRP1	stripe
ENSG00000099256.14	PRTFDC1	stripe
ENSG00000099282.5	TSPAN15	stripe
ENSG00000099308.6	MAST3	stripe
ENSG00000099330.4	OCEL1	stripe
ENSG00000099331.9	MYO9B	anchor
ENSG00000099337.3	KCNK6	stripe
ENSG00000099338.18	CATSPERG	anchor
ENSG00000099341.7	PSMD8	stripe
ENSG00000099364.12	FBXL19	anchor
ENSG00000099365.5	STX1B	stripe
ENSG00000099377.9	HSD3B7	anchor
ENSG00000099381.12	SETD1A	stripe
ENSG00000099385.7	BCL7C	stripe
ENSG00000099622.9	CIRBP	stripe
ENSG00000099624.3	ATP5D	stripe
ENSG00000099625.8	C19orf26	anchor
ENSG00000099769.5	IGFALS	stripe
ENSG00000099783.7	HNRNPM	stripe
ENSG00000099785.6	2022-03-02	stripe
ENSG00000099800.3	TIMM13	stripe
ENSG00000099804.4	CDC34	stripe
ENSG00000099810.14	MTAP	anchor
ENSG00000099812.6	MISP	stripe
ENSG00000099814.11	CEP170B	stripe
ENSG00000099817.7	POLR2E	stripe
ENSG00000099821.9	POLRMT	stripe
ENSG00000099822.2	HCN2	stripe
ENSG00000099834.14	CDHR5	stripe
ENSG00000099849.10	RASSF7	stripe
ENSG00000099860.4	GADD45B	stripe
ENSG00000099864.13	PALM	stripe
ENSG00000099869.6	IGF2-AS	anchor
ENSG00000099889.9	ARVCF	stripe
ENSG00000099899.10	TRMT2A	stripe
ENSG00000099901.12	RANBP1	stripe
ENSG00000099904.11	ZDHHC8	stripe
ENSG00000099910.12	KLHL22	stripe
ENSG00000099917.13	MED15	stripe
ENSG00000099937.6	SERPIND1	stripe
ENSG00000099940.7	SNAP29	stripe
ENSG00000099942.8	CRKL	stripe
ENSG00000099949.14	LZTR1	stripe
ENSG00000099954.14	CECR2	stripe
ENSG00000099957.12	P2RX6	stripe
ENSG00000099960.8	SLC7A4	stripe
ENSG00000099968.13	BCL2L13	stripe
ENSG00000099985.3	OSM	stripe
ENSG00000099992.11	TBC1D10A	stripe
ENSG00000099995.14	SF3A1	stripe
ENSG00000099999.10	RNF215	stripe
ENSG00000100003.13	SEC14L2	stripe
ENSG00000100012.7	SEC14L3	stripe
ENSG00000100023.13	PPIL2	stripe
ENSG00000100024.10	UPB1	stripe
ENSG00000100027.10	YPEL1	stripe
ENSG00000100029.13	PES1	stripe
ENSG00000100030.10	MAPK1	stripe
ENSG00000100034.9	PPM1F	stripe
ENSG00000100036.11	SLC35E4	anchor
ENSG00000100038.15	TOP3B	stripe
ENSG00000100053.5	CRYBB3	stripe
ENSG00000100055.16	CYTH4	stripe
ENSG00000100056.7	DGCR14	stripe
ENSG00000100060.13	MFNG	stripe
ENSG00000100065.10	CARD10	stripe
ENSG00000100068.7	LRP5L	stripe
ENSG00000100075.5	SLC25A1	stripe
ENSG00000100077.10	ADRBK2	stripe
ENSG00000100078.3	PLA2G3	stripe
ENSG00000100079.5	LGALS2	stripe
ENSG00000100084.10	HIRA	stripe
ENSG00000100095.14	SEZ6L	stripe
ENSG00000100099.16	HPS4	stripe
ENSG00000100100.8	PIK3IP1	stripe
ENSG00000100104.8	SRRD	stripe
ENSG00000100109.12	TFIP11	stripe
ENSG00000100122.5	CRYBB1	stripe
ENSG00000100124.8	ANKRD54	stripe
ENSG00000100129.13	EIF3L	stripe
ENSG00000100138.9	NHP2L1	stripe
ENSG00000100139.9	MICALL1	stripe
ENSG00000100142.10	POLR2F	stripe
ENSG00000100146.12	SOX10	stripe
ENSG00000100147.9	CCDC134	stripe
ENSG00000100150.12	DEPDC5	stripe
ENSG00000100151.11	PICK1	stripe
ENSG00000100154.10	TTC28	stripe
ENSG00000100156.6	SLC16A8	stripe
ENSG00000100162.10	CENPM	anchor
ENSG00000100167.15	2022-09-03	anchor
ENSG00000100197.16	CYP2D6	stripe
ENSG00000100207.14	TCF20	stripe
ENSG00000100209.5	HSCB	stripe
ENSG00000100216.4	TOMM22	stripe
ENSG00000100218.7	RTDR1	stripe
ENSG00000100219.12	XBP1	stripe
ENSG00000100221.6	JOSD1	stripe
ENSG00000100226.11	GTPBP1	stripe
ENSG00000100228.8	RAB36	stripe
ENSG00000100234.11	TIMP3	stripe
ENSG00000100239.11	PPP6R2	stripe
ENSG00000100241.16	SBF1	stripe
ENSG00000100242.11	SUN2	stripe
ENSG00000100246.8	DNAL4	stripe
ENSG00000100249.4	C22orf31	stripe
ENSG00000100253.8	MIOX	stripe
ENSG00000100258.13	LMF2	stripe
ENSG00000100263.9	RHBDD3	stripe
ENSG00000100266.13	PACSIN2	stripe
ENSG00000100276.9	RASL10A	stripe
ENSG00000100280.12	AP1B1	stripe
ENSG00000100285.9	NEFH	stripe
ENSG00000100292.12	HMOX1	stripe
ENSG00000100296.9	THOC5	stripe
ENSG00000100297.11	MCM5	stripe
ENSG00000100298.11	APOBEC3H	anchor
ENSG00000100299.13	ARSA	stripe
ENSG00000100302.6	RASD2	stripe
ENSG00000100307.8	CBX7	anchor
ENSG00000100311.12	PDGFB	stripe
ENSG00000100314.3	CABP7	stripe
ENSG00000100316.11	RPL3	stripe
ENSG00000100319.11	ZMAT5	stripe
ENSG00000100320.18	RBFOX2	stripe
ENSG00000100321.10	SYNGR1	stripe
ENSG00000100324.9	TAB1	stripe
ENSG00000100325.10	ASCC2	stripe
ENSG00000100330.11	MTMR3	stripe
ENSG00000100335.8	MIEF1	stripe
ENSG00000100336.13	APOL4	stripe
ENSG00000100341.7	PNPLA5	stripe
ENSG00000100342.16	APOL1	stripe
ENSG00000100344.6	PNPLA3	stripe
ENSG00000100345.16	MYH9	stripe
ENSG00000100346.13	CACNA1I	stripe
ENSG00000100347.10	SAMM50	stripe
ENSG00000100351.12	GRAP2	stripe
ENSG00000100354.16	TNRC6B	anchor
ENSG00000100359.16	SGSM3	stripe
ENSG00000100360.10	IFT27	anchor
ENSG00000100362.8	PVALB	stripe
ENSG00000100364.14	KIAA0930	stripe
ENSG00000100365.10	NCF4	stripe
ENSG00000100368.9	CSF2RB	stripe
ENSG00000100372.10	SLC25A17	stripe
ENSG00000100373.5	UPK3A	stripe
ENSG00000100376.7	FAM118A	stripe
ENSG00000100379.13	KCTD17	stripe
ENSG00000100380.8	ST13	stripe
ENSG00000100385.9	IL2RB	stripe
ENSG00000100387.8	RBX1	stripe
ENSG00000100393.9	EP300	stripe
ENSG00000100395.10	L3MBTL2	stripe
ENSG00000100399.11	CHADL	stripe
ENSG00000100401.15	RANGAP1	stripe
ENSG00000100403.10	ZC3H7B	stripe
ENSG00000100410.3	PHF5A	stripe
ENSG00000100412.11	ACO2	stripe
ENSG00000100413.12	POLR3H	stripe
ENSG00000100416.8	TRMU	stripe
ENSG00000100417.7	PMM1	stripe
ENSG00000100418.7	DESI1	stripe
ENSG00000100422.9	CERK	stripe
ENSG00000100425.14	BRD1	stripe
ENSG00000100426.6	ZBED4	stripe
ENSG00000100427.11	MLC1	stripe
ENSG00000100429.13	HDAC10	anchor
ENSG00000100439.6	ABHD4	stripe
ENSG00000100441.5	KHNYN	anchor
ENSG00000100461.13	RBM23	stripe
ENSG00000100462.11	PRMT5	stripe
ENSG00000100473.11	COCH	stripe
ENSG00000100478.10	AP4S1	stripe
ENSG00000100483.9	VCPKMT	stripe
ENSG00000100485.7	SOS2	stripe
ENSG00000100490.5	CDKL1	stripe
ENSG00000100503.19	NIN	stripe
ENSG00000100504.12	PYGL	stripe
ENSG00000100505.9	TRIM9	stripe
ENSG00000100519.7	PSMC6	stripe
ENSG00000100522.4	GNPNAT1	stripe
ENSG00000100532.7	CGRRF1	stripe
ENSG00000100564.4	PIGH	stripe
ENSG00000100565.11	C14orf166B	stripe
ENSG00000100568.6	VTI1B	stripe
ENSG00000100591.3	AHSA1	anchor
ENSG00000100592.11	DAAM1	stripe
ENSG00000100593.13	ISM2	stripe
ENSG00000100596.2	SPTLC2	stripe
ENSG00000100599.11	RIN3	stripe
ENSG00000100600.10	LGMN	stripe
ENSG00000100601.5	ALKBH1	stripe
ENSG00000100603.9	SNW1	stripe
ENSG00000100612.9	DHRS7	stripe
ENSG00000100614.13	PPM1A	stripe
ENSG00000100626.12	GALNT16	anchor
ENSG00000100628.7	ASB2	stripe
ENSG00000100632.6	ERH	stripe
ENSG00000100644.12	HIF1A	stripe
ENSG00000100714.11	MTHFD1	stripe
ENSG00000100726.10	TELO2	stripe
ENSG00000100731.11	PCNX	stripe
ENSG00000100744.10	GSKIP	stripe
ENSG00000100767.11	PAPLN	stripe
ENSG00000100784.5	RPS6KA5	stripe
ENSG00000100796.13	SMEK1	stripe
ENSG00000100802.10	C14orf93	stripe
ENSG00000100804.14	PSMB5	stripe
ENSG00000100811.6	YY1	stripe
ENSG00000100813.10	ACIN1	stripe
ENSG00000100814.13	CCNB1IP1	stripe
ENSG00000100815.8	TRIP11	stripe
ENSG00000100823.7	APEX1	stripe
ENSG00000100836.6	PABPN1	stripe
ENSG00000100842.8	EFS	stripe
ENSG00000100852.8	ARHGAP5	stripe
ENSG00000100865.10	CINP	stripe
ENSG00000100867.10	DHRS2	stripe
ENSG00000100883.7	SRP54	stripe
ENSG00000100884.5	CPNE6	stripe
ENSG00000100888.8	CHD8	stripe
ENSG00000100889.7	PCK2	stripe
ENSG00000100897.13	DCAF11	stripe
ENSG00000100902.6	PSMA6	stripe
ENSG00000100906.6	NFKBIA	anchor
ENSG00000100908.9	EMC9	stripe
ENSG00000100911.9	PSME2	stripe
ENSG00000100918.8	REC8	stripe
ENSG00000100926.10	TM9SF1	stripe
ENSG00000100938.13	GMPR2	stripe
ENSG00000100949.10	RABGGTA	stripe
ENSG00000100968.9	NFATC4	stripe
ENSG00000100979.10	PLTP	stripe
ENSG00000100982.7	PCIF1	stripe
ENSG00000100985.7	MMP9	stripe
ENSG00000100987.10	VSX1	stripe
ENSG00000100994.7	PYGB	stripe
ENSG00000100997.14	ABHD12	stripe
ENSG00000101003.8	GINS1	stripe
ENSG00000101004.10	NINL	stripe
ENSG00000101017.9	CD40	stripe
ENSG00000101019.17	UQCC1	stripe
ENSG00000101040.15	ZMYND8	stripe
ENSG00000101049.10	SGK2	stripe
ENSG00000101052.8	IFT52	stripe
ENSG00000101057.11	MYBL2	stripe
ENSG00000101074.3	R3HDML	stripe
ENSG00000101076.12	HNF4A	stripe
ENSG00000101079.16	NDRG3	stripe
ENSG00000101082.9	SLA2	stripe
ENSG00000101084.12	C20orf24	stripe
ENSG00000101098.8	RIMS4	stripe
ENSG00000101104.8	PABPC1L	stripe
ENSG00000101109.7	STK4	stripe
ENSG00000101132.5	PFDN4	anchor
ENSG00000101150.13	TPD52L2	stripe
ENSG00000101152.6	DNAJC5	stripe
ENSG00000101158.8	NELFCD	stripe
ENSG00000101160.9	CTSZ	stripe
ENSG00000101161.6	PRPF6	stripe
ENSG00000101162.3	TUBB1	stripe
ENSG00000101166.11	SLMO2	stripe
ENSG00000101180.11	HRH3	stripe
ENSG00000101181.13	MTG2	stripe
ENSG00000101182.10	PSMA7	stripe
ENSG00000101187.11	SLCO4A1	stripe
ENSG00000101188.4	NTSR1	stripe
ENSG00000101189.5	MRGBP	stripe
ENSG00000101190.8	TCFL5	stripe
ENSG00000101191.12	DIDO1	stripe
ENSG00000101193.6	GID8	stripe
ENSG00000101194.13	SLC17A9	stripe
ENSG00000101200.5	AVP	stripe
ENSG00000101213.5	PTK6	anchor
ENSG00000101216.6	GMEB2	stripe
ENSG00000101220.13	C20orf27	stripe
ENSG00000101222.8	SPEF1	stripe
ENSG00000101224.13	CDC25B	stripe
ENSG00000101230.5	ISM1	stripe
ENSG00000101236.12	RNF24	stripe
ENSG00000101246.15	ARFRP1	stripe
ENSG00000101255.6	TRIB3	stripe
ENSG00000101265.11	RASSF2	stripe
ENSG00000101266.12	CSNK2A1	stripe
ENSG00000101276.10	SLC52A3	stripe
ENSG00000101280.6	ANGPT4	stripe
ENSG00000101282.4	RSPO4	stripe
ENSG00000101298.9	SNPH	stripe
ENSG00000101306.6	MYLK2	anchor
ENSG00000101307.11	SIRPB1	stripe
ENSG00000101327.4	PDYN	stripe
ENSG00000101331.11	CCM2L	stripe
ENSG00000101336.8	HCK	stripe
ENSG00000101342.5	TLDC2	anchor
ENSG00000101347.7	SAMHD1	stripe
ENSG00000101353.10	MROH8	stripe
ENSG00000101363.8	MANBAL	stripe
ENSG00000101367.8	MAPRE1	stripe
ENSG00000101400.5	SNTA1	stripe
ENSG00000101405.3	OXT	stripe
ENSG00000101421.3	CHMP4B	stripe
ENSG00000101438.3	SLC32A1	stripe
ENSG00000101442.8	ACTR5	stripe
ENSG00000101443.13	WFDC2	stripe
ENSG00000101444.8	AHCY	anchor
ENSG00000101445.5	PPP1R16B	stripe
ENSG00000101447.9	FAM83D	stripe
ENSG00000101452.10	DHX35	stripe
ENSG00000101457.8	DNTTIP1	stripe
ENSG00000101460.8	MAP1LC3A	stripe
ENSG00000101463.5	SYNDIG1	stripe
ENSG00000101464.6	PIGU	stripe
ENSG00000101470.5	TNNC2	stripe
ENSG00000101473.12	ACOT8	stripe
ENSG00000101474.7	APMAP	anchor
ENSG00000101493.6	ZNF516	stripe
ENSG00000101557.10	USP14	stripe
ENSG00000101574.10	METTL4	anchor
ENSG00000101577.5	LPIN2	stripe
ENSG00000101596.10	SMCHD1	stripe
ENSG00000101605.8	MYOM1	stripe
ENSG00000101608.8	MYL12A	anchor
ENSG00000101624.6	CEP76	stripe
ENSG00000101638.9	ST8SIA5	stripe
ENSG00000101745.11	ANKRD12	stripe
ENSG00000101782.10	RIOK3	stripe
ENSG00000101849.11	TBL1X	anchor
ENSG00000101850.8	GPR143	stripe
ENSG00000101911.8	PRPS2	stripe
ENSG00000101986.8	ABCD1	stripe
ENSG00000102030.11	NAA10	stripe
ENSG00000102032.8	RENBP	stripe
ENSG00000102076.5	OPN1LW	stripe
ENSG00000102098.13	SCML2	stripe
ENSG00000102104.8	RS1	stripe
ENSG00000102119.6	EMD	stripe
ENSG00000102125.11	TAZ	stripe
ENSG00000102178.8	UBL4A	stripe
ENSG00000102181.15	CD99L2	stripe
ENSG00000102245.3	CD40LG	stripe
ENSG00000102302.7	FGD1	stripe
ENSG00000102316.12	MAGED2	anchor
ENSG00000102471.9	NDFIP2	stripe
ENSG00000102531.12	FNDC3A	anchor
ENSG00000102539.4	MLNR	stripe
ENSG00000102543.10	CDADC1	stripe
ENSG00000102547.14	CAB39L	stripe
ENSG00000102575.6	ACP5	anchor
ENSG00000102678.6	FGF9	stripe
ENSG00000102699.5	PARP4	stripe
ENSG00000102743.10	SLC25A15	anchor
ENSG00000102753.5	KPNA3	stripe
ENSG00000102755.6	FLT1	stripe
ENSG00000102760.12	RGCC	stripe
ENSG00000102763.11	VWA8	stripe
ENSG00000102780.12	DGKH	stripe
ENSG00000102781.9	KATNAL1	stripe
ENSG00000102786.10	INTS6	stripe
ENSG00000102794.5	IRG1	stripe
ENSG00000102796.6	DHRS12	stripe
ENSG00000102804.10	TSC22D1	stripe
ENSG00000102805.9	CLN5	stripe
ENSG00000102858.8	MGRN1	stripe
ENSG00000102870.4	ZNF629	stripe
ENSG00000102871.11	TRADD	stripe
ENSG00000102878.11	HSF4	stripe
ENSG00000102879.11	CORO1A	stripe
ENSG00000102882.7	MAPK3	stripe
ENSG00000102886.10	GDPD3	stripe
ENSG00000102890.10	ELMO3	stripe
ENSG00000102891.3	MT4	stripe
ENSG00000102893.11	PHKB	stripe
ENSG00000102897.5	LYRM1	stripe
ENSG00000102898.7	NUTF2	stripe
ENSG00000102901.8	CENPT	stripe
ENSG00000102904.10	TSNAXIP1	stripe
ENSG00000102910.9	LONP2	stripe
ENSG00000102921.3	N4BP1	anchor
ENSG00000102931.3	ARL2BP	stripe
ENSG00000102934.5	PLLP	stripe
ENSG00000102962.4	CCL22	stripe
ENSG00000102970.6	CCL17	stripe
ENSG00000102974.10	CTCF	stripe
ENSG00000102977.9	ACD	stripe
ENSG00000102978.8	POLR2C	stripe
ENSG00000102981.5	PARD6A	stripe
ENSG00000102996.4	MMP15	stripe
ENSG00000103005.7	USB1	stripe
ENSG00000103021.5	CCDC113	stripe
ENSG00000103023.7	PRSS54	stripe
ENSG00000103024.3	NME3	stripe
ENSG00000103034.10	NDRG4	stripe
ENSG00000103037.7	SETD6	stripe
ENSG00000103042.4	SLC38A7	stripe
ENSG00000103044.6	HAS3	stripe
ENSG00000103047.3	TANGO6	stripe
ENSG00000103051.14	COG4	stripe
ENSG00000103056.7	SMPD3	stripe
ENSG00000103061.7	SLC7A6OS	stripe
ENSG00000103064.9	SLC7A6	stripe
ENSG00000103066.8	PLA2G15	anchor
ENSG00000103067.7	ESRP2	anchor
ENSG00000103091.10	WDR59	anchor
ENSG00000103121.4	CMC2	stripe
ENSG00000103126.10	AXIN1	anchor
ENSG00000103148.11	NPRL3	stripe
ENSG00000103152.7	MPG	stripe
ENSG00000103154.5	NECAB2	stripe
ENSG00000103160.7	HSDL1	stripe
ENSG00000103168.12	TAF1C	stripe
ENSG00000103175.6	WFDC1	stripe
ENSG00000103184.7	SEC14L5	anchor
ENSG00000103187.6	COTL1	stripe
ENSG00000103194.11	USP10	stripe
ENSG00000103196.7	CRISPLD2	stripe
ENSG00000103197.12	TSC2	stripe
ENSG00000103199.9	ZNF500	stripe
ENSG00000103222.14	ABCC1	stripe
ENSG00000103248.13	MTHFSD	anchor
ENSG00000103249.13	CLCN7	stripe
ENSG00000103257.4	SLC7A5	stripe
ENSG00000103264.11	FBXO31	stripe
ENSG00000103274.6	NUBP1	stripe
ENSG00000103275.14	UBE2I	stripe
ENSG00000103313.7	MEFV	stripe
ENSG00000103316.6	CRYM	stripe
ENSG00000103319.7	EEF2K	anchor
ENSG00000103335.15	PIEZO1	stripe
ENSG00000103342.8	GSPT1	stripe
ENSG00000103343.8	ZNF174	stripe
ENSG00000103353.11	UBFD1	stripe
ENSG00000103355.8	PRSS33	stripe
ENSG00000103356.11	EARS2	stripe
ENSG00000103363.10	TCEB2	stripe
ENSG00000103375.6	AQP8	anchor
ENSG00000103381.7	CPPED1	stripe
ENSG00000103415.7	HMOX2	stripe
ENSG00000103423.9	DNAJA3	stripe
ENSG00000103479.10	RBL2	stripe
ENSG00000103489.7	XYLT1	anchor
ENSG00000103490.13	PYCARD	anchor
ENSG00000103494.8	RPGRIP1L	stripe
ENSG00000103495.9	MAZ	stripe
ENSG00000103496.10	STX4	stripe
ENSG00000103502.9	CDIPT	stripe
ENSG00000103507.9	BCKDK	stripe
ENSG00000103510.15	KAT8	stripe
ENSG00000103540.12	CCP110	stripe
ENSG00000103544.10	C16orf62	stripe
ENSG00000103549.17	RNF40	stripe
ENSG00000103550.9	KNOP1	stripe
ENSG00000103569.5	AQP9	stripe
ENSG00000103591.8	AAGAB	stripe
ENSG00000103599.15	IQCH	stripe
ENSG00000103642.7	LACTB	stripe
ENSG00000103647.8	CORO2B	stripe
ENSG00000103653.12	CSK	stripe
ENSG00000103657.9	HERC1	stripe
ENSG00000103671.5	TRIP4	stripe
ENSG00000103707.5	MTFMT	stripe
ENSG00000103710.6	RASL12	stripe
ENSG00000103723.8	AP3B2	stripe
ENSG00000103740.5	ACSBG1	stripe
ENSG00000103769.5	RAB11A	stripe
ENSG00000103876.7	FAH	stripe
ENSG00000103888.11	KIAA1199	stripe
ENSG00000103932.7	RPAP1	stripe
ENSG00000103942.8	HOMER2	stripe
ENSG00000104055.10	TGM5	stripe
ENSG00000104064.12	GABPB1	stripe
ENSG00000104081.9	BMF	stripe
ENSG00000104131.8	EIF3J	stripe
ENSG00000104133.10	SPG11	stripe
ENSG00000104205.8	SGK3	stripe
ENSG00000104213.8	PDGFRL	stripe
ENSG00000104218.9	CSPP1	stripe
ENSG00000104221.8	BRF2	stripe
ENSG00000104228.8	TRIM35	stripe
ENSG00000104290.6	FZD3	stripe
ENSG00000104299.10	INTS9	stripe
ENSG00000104312.6	RIPK2	stripe
ENSG00000104320.9	NBN	anchor
ENSG00000104325.2	DECR1	anchor
ENSG00000104343.15	UBE2W	stripe
ENSG00000104365.9	IKBKB	stripe
ENSG00000104368.13	PLAT	stripe
ENSG00000104369.4	JPH1	stripe
ENSG00000104371.4	DKK4	anchor
ENSG00000104381.8	GDAP1	stripe
ENSG00000104388.10	RAB2A	stripe
ENSG00000104413.11	ESRP1	stripe
ENSG00000104419.10	NDRG1	stripe
ENSG00000104442.5	ARMC1	anchor
ENSG00000104450.8	SPAG1	anchor
ENSG00000104490.13	NCALD	stripe
ENSG00000104499.2	GML	stripe
ENSG00000104517.8	UBR5	stripe
ENSG00000104518.6	GSDMD	stripe
ENSG00000104522.11	TSTA3	stripe
ENSG00000104524.9	PYCRL	anchor
ENSG00000104529.13	EEF1D	stripe
ENSG00000104537.12	ANXA13	stripe
ENSG00000104549.7	SQLE	stripe
ENSG00000104611.7	SH2D4A	stripe
ENSG00000104613.7	INTS10	stripe
ENSG00000104626.10	ERI1	stripe
ENSG00000104635.9	SLC39A14	stripe
ENSG00000104643.5	MTMR9	stripe
ENSG00000104660.13	LEPROTL1	stripe
ENSG00000104671.3	DCTN6	anchor
ENSG00000104679.6	R3HCC1	stripe
ENSG00000104689.5	TNFRSF10A	stripe
ENSG00000104714.9	ERICH1	stripe
ENSG00000104728.11	ARHGEF10	stripe
ENSG00000104774.8	MAN2B1	stripe
ENSG00000104783.7	KCNN4	stripe
ENSG00000104804.3	TULP2	stripe
ENSG00000104805.11	NUCB1	stripe
ENSG00000104808.3	DHDH	stripe
ENSG00000104812.10	GYS1	anchor
ENSG00000104814.8	MAP4K1	anchor
ENSG00000104823.4	ECH1	stripe
ENSG00000104824.12	HNRNPL	stripe
ENSG00000104825.12	NFKBIB	stripe
ENSG00000104826.7	LHB	stripe
ENSG00000104833.6	TUBB4A	stripe
ENSG00000104835.10	SARS2	stripe
ENSG00000104848.1	KCNA7	stripe
ENSG00000104852.10	SNRNP70	stripe
ENSG00000104853.11	CLPTM1	stripe
ENSG00000104856.9	RELB	stripe
ENSG00000104859.10	CLASRP	stripe
ENSG00000104863.7	LIN7B	stripe
ENSG00000104870.8	FCGRT	anchor
ENSG00000104872.6	PIH1D1	stripe
ENSG00000104880.13	ARHGEF18	stripe
ENSG00000104883.3	PEX11G	stripe
ENSG00000104886.5	PLEKHJ1	stripe
ENSG00000104888.5	SLC17A7	stripe
ENSG00000104889.4	RNASEH2A	stripe
ENSG00000104894.7	CD37	stripe
ENSG00000104897.5	SF3A2	stripe
ENSG00000104899.4	AMH	stripe
ENSG00000104901.2	DKKL1	stripe
ENSG00000104903.4	LYL1	stripe
ENSG00000104904.8	OAZ1	stripe
ENSG00000104907.8	TRMT1	stripe
ENSG00000104915.10	STX10	stripe
ENSG00000104918.4	RETN	stripe
ENSG00000104921.10	FCER2	stripe
ENSG00000104936.13	DMPK	stripe
ENSG00000104938.12	CLEC4M	stripe
ENSG00000104941.3	RSPH6A	stripe
ENSG00000104953.14	TLE6	stripe
ENSG00000104957.9	CCDC130	stripe
ENSG00000104960.11	PTOV1	stripe
ENSG00000104964.10	AES	stripe
ENSG00000104967.6	NOVA2	stripe
ENSG00000104969.5	SGTA	stripe
ENSG00000104970.6	KIR3DX1	stripe
ENSG00000104972.10	LILRB1	stripe
ENSG00000104973.10	MED25	stripe
ENSG00000104974.6	LILRA1	stripe
ENSG00000104976.7	SNAPC2	stripe
ENSG00000104979.4	C19orf53	anchor
ENSG00000104980.3	TIMM44	stripe
ENSG00000104983.4	CCDC61	stripe
ENSG00000104998.2	IL27RA	stripe
ENSG00000105011.4	ASF1B	stripe
ENSG00000105048.12	TNNT1	stripe
ENSG00000105058.7	FAM32A	stripe
ENSG00000105063.14	PPP6R1	stripe
ENSG00000105088.4	OLFM2	anchor
ENSG00000105122.8	RASAL3	stripe
ENSG00000105127.4	AKAP8	stripe
ENSG00000105131.3	EPHX3	stripe
ENSG00000105135.11	ILVBL	stripe
ENSG00000105136.15	ZNF419	stripe
ENSG00000105137.8	SYDE1	stripe
ENSG00000105146.8	AURKC	stripe
ENSG00000105171.5	POP4	anchor
ENSG00000105173.9	CCNE1	stripe
ENSG00000105176.13	URI1	stripe
ENSG00000105193.4	RPS16	stripe
ENSG00000105197.6	TIMM50	stripe
ENSG00000105198.6	LGALS13	stripe
ENSG00000105202.3	FBL	stripe
ENSG00000105204.9	DYRK1B	stripe
ENSG00000105205.6	CLC	stripe
ENSG00000105219.4	CNTD2	stripe
ENSG00000105220.10	GPI	stripe
ENSG00000105221.12	AKT2	stripe
ENSG00000105223.14	PLD3	stripe
ENSG00000105227.10	PRX	stripe
ENSG00000105245.5	NUMBL	stripe
ENSG00000105281.8	SLC1A5	stripe
ENSG00000105287.8	PRKD2	stripe
ENSG00000105289.10	TJP3	stripe
ENSG00000105321.8	CCDC9	stripe
ENSG00000105323.12	HNRNPUL1	stripe
ENSG00000105327.11	BBC3	anchor
ENSG00000105329.5	TGFB1	stripe
ENSG00000105339.6	DENND3	stripe
ENSG00000105341.14	ATP5SL	stripe
ENSG00000105355.4	PLIN3	stripe
ENSG00000105364.9	MRPL4	anchor
ENSG00000105366.11	SIGLEC8	stripe
ENSG00000105370.3	LIM2	stripe
ENSG00000105371.8	ICAM4	stripe
ENSG00000105373.14	GLTSCR2	stripe
ENSG00000105374.5	NKG7	stripe
ENSG00000105376.4	ICAM5	stripe
ENSG00000105379.5	ETFB	stripe
ENSG00000105383.10	CD33	stripe
ENSG00000105393.11	BABAM1	stripe
ENSG00000105397.9	TYK2	stripe
ENSG00000105401.2	CDC37	stripe
ENSG00000105402.3	NAPA	stripe
ENSG00000105419.13	MEIS3	stripe
ENSG00000105427.5	CNFN	stripe
ENSG00000105429.8	MEGF8	stripe
ENSG00000105438.4	KDELR1	stripe
ENSG00000105443.9	CYTH2	stripe
ENSG00000105447.8	GRWD1	stripe
ENSG00000105464.3	GRIN2D	stripe
ENSG00000105467.4	SYNGR4	stripe
ENSG00000105472.8	CLEC11A	stripe
ENSG00000105479.11	CCDC114	stripe
ENSG00000105483.12	CARD8	stripe
ENSG00000105486.9	LIG1	stripe
ENSG00000105492.11	SIGLEC6	stripe
ENSG00000105497.3	ZNF175	stripe
ENSG00000105499.9	PLA2G4C	stripe
ENSG00000105507.2	CABP5	stripe
ENSG00000105514.3	RAB3D	stripe
ENSG00000105516.6	DBP	anchor
ENSG00000105518.9	TMEM205	stripe
ENSG00000105519.8	CAPS	stripe
ENSG00000105520.6	DKFZP761J1410	stripe
ENSG00000105523.3	FAM83E	stripe
ENSG00000105538.4	RASIP1	stripe
ENSG00000105550.4	FGF21	stripe
ENSG00000105552.10	BCAT2	stripe
ENSG00000105559.7	PLEKHA4	stripe
ENSG00000105576.11	TNPO2	stripe
ENSG00000105583.5	WDR83OS	stripe
ENSG00000105605.3	CACNG7	stripe
ENSG00000105613.5	MAST1	stripe
ENSG00000105617.3	LENG1	stripe
ENSG00000105618.9	PRPF31	stripe
ENSG00000105619.9	TFPT	stripe
ENSG00000105639.14	JAK3	stripe
ENSG00000105640.8	RPL18A	stripe
ENSG00000105641.3	SLC5A5	stripe
ENSG00000105642.11	KCNN1	anchor
ENSG00000105643.5	ARRDC2	stripe
ENSG00000105649.5	RAB3A	anchor
ENSG00000105650.17	PDE4C	stripe
ENSG00000105655.14	ISYNA1	stripe
ENSG00000105656.8	ELL	stripe
ENSG00000105662.11	CRTC1	stripe
ENSG00000105664.6	COMP	stripe
ENSG00000105668.3	UPK1A	stripe
ENSG00000105672.10	ETV2	stripe
ENSG00000105675.4	ATP4A	stripe
ENSG00000105677.7	TMEM147	anchor
ENSG00000105696.4	TMEM59L	stripe
ENSG00000105700.6	KXD1	stripe
ENSG00000105701.11	FKBP8	stripe
ENSG00000105705.11	SUGP1	stripe
ENSG00000105707.9	HPN	stripe
ENSG00000105708.8	ZNF14	stripe
ENSG00000105711.6	SCN1B	stripe
ENSG00000105717.9	PBX4	stripe
ENSG00000105722.5	ERF	stripe
ENSG00000105723.7	GSK3A	stripe
ENSG00000105726.12	ATP13A1	stripe
ENSG00000105738.6	SIPA1L3	anchor
ENSG00000105750.10	ZNF85	stripe
ENSG00000105755.3	ETHE1	stripe
ENSG00000105767.2	CADM4	stripe
ENSG00000105771.9	SMG9	stripe
ENSG00000105810.5	CDK6	stripe
ENSG00000105835.7	NAMPT	stripe
ENSG00000105851.6	PIK3CG	stripe
ENSG00000105856.9	HBP1	stripe
ENSG00000105865.6	DUS4L	stripe
ENSG00000105866.9	SP4	stripe
ENSG00000105875.9	WDR91	stripe
ENSG00000105877.13	DNAH11	stripe
ENSG00000105879.7	CBLL1	stripe
ENSG00000105880.4	DLX5	anchor
ENSG00000105889.10	STEAP1B	stripe
ENSG00000105926.11	MPP6	stripe
ENSG00000105928.9	DFNA5	stripe
ENSG00000105953.10	OGDH	anchor
ENSG00000105963.9	ADAP1	stripe
ENSG00000105968.14	H2AFV	stripe
ENSG00000105971.10	CAV2	stripe
ENSG00000105974.7	CAV1	stripe
ENSG00000105997.18	HOXA3	stripe
ENSG00000106004.4	HOXA5	stripe
ENSG00000106006.6	HOXA6	stripe
ENSG00000106038.8	EVX1	stripe
ENSG00000106049.4	HIBADH	stripe
ENSG00000106052.9	TAX1BP1	stripe
ENSG00000106066.9	CPVL	stripe
ENSG00000106069.16	CHN2	stripe
ENSG00000106070.13	GRB10	stripe
ENSG00000106077.14	ABHD11	stripe
ENSG00000106080.6	FKBP14	stripe
ENSG00000106086.14	PLEKHA8	stripe
ENSG00000106089.7	STX1A	stripe
ENSG00000106100.6	NOD1	stripe
ENSG00000106123.7	EPHB6	stripe
ENSG00000106144.15	CASP2	stripe
ENSG00000106153.12	CHCHD2	stripe
ENSG00000106178.2	CCL24	stripe
ENSG00000106211.8	HSPB1	stripe
ENSG00000106244.8	PDAP1	stripe
ENSG00000106245.5	BUD31	stripe
ENSG00000106261.12	ZKSCAN1	stripe
ENSG00000106263.13	EIF3B	stripe
ENSG00000106266.4	SNX8	stripe
ENSG00000106268.11	NUDT1	stripe
ENSG00000106290.10	TAF6	stripe
ENSG00000106299.7	WASL	stripe
ENSG00000106305.5	AIMP2	stripe
ENSG00000106327.8	TFR2	stripe
ENSG00000106328.8	FSCN3	stripe
ENSG00000106330.7	MOSPD3	stripe
ENSG00000106331.10	PAX4	stripe
ENSG00000106333.8	PCOLCE	stripe
ENSG00000106336.8	FBXO24	stripe
ENSG00000106346.7	USP42	stripe
ENSG00000106348.12	IMPDH1	stripe
ENSG00000106351.8	AGFG2	stripe
ENSG00000106366.7	SERPINE1	stripe
ENSG00000106367.9	AP1S1	stripe
ENSG00000106384.6	MOGAT3	stripe
ENSG00000106392.6	C1GALT1	stripe
ENSG00000106397.7	PLOD3	stripe
ENSG00000106399.7	RPA3	stripe
ENSG00000106400.7	ZNHIT1	stripe
ENSG00000106404.9	CLDN15	stripe
ENSG00000106415.8	GLCCI1	stripe
ENSG00000106436.4	MYL10	stripe
ENSG00000106443.10	PHF14	stripe
ENSG00000106459.10	NRF1	stripe
ENSG00000106462.6	EZH2	stripe
ENSG00000106477.14	CEP41	stripe
ENSG00000106484.10	MEST	stripe
ENSG00000106524.4	ANKMY2	stripe
ENSG00000106526.6	ACTR3C	stripe
ENSG00000106536.15	POU6F2	stripe
ENSG00000106537.7	TSPAN13	stripe
ENSG00000106538.5	RARRES2	stripe
ENSG00000106546.8	AHR	stripe
ENSG00000106560.6	GIMAP2	stripe
ENSG00000106565.13	TMEM176B	stripe
ENSG00000106588.6	PSMA2	stripe
ENSG00000106591.3	MRPL32	stripe
ENSG00000106603.13	COA1	stripe
ENSG00000106605.6	BLVRA	stripe
ENSG00000106609.12	TMEM248	stripe
ENSG00000106615.5	RHEB	stripe
ENSG00000106624.4	AEBP1	stripe
ENSG00000106628.6	POLD2	stripe
ENSG00000106631.4	MYL7	stripe
ENSG00000106633.11	GCK	stripe
ENSG00000106636.3	YKT6	stripe
ENSG00000106665.11	CLIP2	stripe
ENSG00000106682.10	EIF4H	stripe
ENSG00000106683.10	LIMK1	stripe
ENSG00000106686.12	SPATA6L	stripe
ENSG00000106688.7	SLC1A1	stripe
ENSG00000106689.6	LHX2	stripe
ENSG00000106723.12	SPIN1	stripe
ENSG00000106733.16	NMRK1	stripe
ENSG00000106780.7	MEGF9	stripe
ENSG00000106785.10	TRIM14	stripe
ENSG00000106789.8	CORO2A	stripe
ENSG00000106799.8	TGFBR1	stripe
ENSG00000106803.5	SEC61B	stripe
ENSG00000106804.6	C5	stripe
ENSG00000106852.11	LHX6	stripe
ENSG00000106853.12	PTGR1	stripe
ENSG00000106868.12	SUSD1	stripe
ENSG00000106948.12	AKNA	stripe
ENSG00000106952.3	TNFSF8	stripe
ENSG00000106991.9	ENG	stripe
ENSG00000106992.13	AK1	stripe
ENSG00000106993.7	CDC37L1	stripe
ENSG00000107014.7	RLN2	stripe
ENSG00000107018.6	RLN1	stripe
ENSG00000107020.5	PLGRKT	stripe
ENSG00000107021.11	TBC1D13	stripe
ENSG00000107036.7	KIAA1432	anchor
ENSG00000107077.13	KDM4C	stripe
ENSG00000107099.11	DOCK8	anchor
ENSG00000107104.14	KANK1	stripe
ENSG00000107130.6	NCS1	stripe
ENSG00000107140.11	TESK1	stripe
ENSG00000107164.15	FUBP3	stripe
ENSG00000107187.11	LHX3	stripe
ENSG00000107223.8	EDF1	stripe
ENSG00000107242.13	PIP5K1B	stripe
ENSG00000107249.17	GLIS3	stripe
ENSG00000107263.14	RAPGEF1	anchor
ENSG00000107281.5	NPDC1	stripe
ENSG00000107317.7	PTGDS	stripe
ENSG00000107331.12	ABCA2	stripe
ENSG00000107338.8	SHB	stripe
ENSG00000107362.9	ABHD17B	stripe
ENSG00000107404.13	DVL1	stripe
ENSG00000107438.4	PDLIM1	stripe
ENSG00000107443.11	CCNJ	stripe
ENSG00000107447.4	DNTT	stripe
ENSG00000107485.11	GATA3	stripe
ENSG00000107554.11	DNMBP	stripe
ENSG00000107566.9	ERLIN1	stripe
ENSG00000107581.8	EIF3A	stripe
[truncated: 17,139 more rows]
