# Supplementary material for: Dynamic chromatin architecture identifies new autoimmune-associated enhancers for IL2 and novel genes regulating CD4+ T cell activation
Source: eLife. 2024 Sep 20;13:RP96852. doi: 10.7554/eLife.96852 (PMC11418197; doi:10.7554/eLife.96852)
Supplement: Supplementary file 9. [file elife-96852-supp9.xlsx]

## Sheet: SupTab_05_HiC_diff
Table S9: Differential loop contact frequency
chr_a	start_a	start_b	D	logFC	logCPM	F	p.value	p.adj	end_a	chr_b	end_b	resol	comp
chr10	17452000	17466000	7	-1.82585	3.35127	33.9985	1.26e-08	0.0202951	17454000	chr10	17468000	2000	hr8_vs_unstim
chr14	98642000	98648000	3	-1.8276	3.42336	33.1555	5.88e-08	0.0413618	98644000	chr14	98650000	2000	hr8_vs_unstim
chr15	38948000	38960000	6	-1.70683	4.0641	33.2941	1.34e-08	0.0202951	38950000	chr15	38962000	2000	hr8_vs_unstim
chr16	89162000	89180000	9	-1.52969	4.42306	30.6579	3.95e-08	0.0335572	89164000	chr16	89182000	2000	hr8_vs_unstim
chr17	57838000	57920000	41	3.0245	5.98925	33.658	7.36e-08	0.0477077	57840000	chr17	57922000	2000	hr8_vs_unstim
chr19	16478000	16494000	8	-1.99493	4.39355	35.0761	3.38e-08	0.0315206	16480000	chr19	16496000	2000	hr8_vs_unstim
chr2	136874000	136892000	9	-1.65091	2.60963	31.9963	2.41e-08	0.0257722	136876000	chr2	136894000	2000	hr8_vs_unstim
chr20	42686000	42696000	5	-1.90458	4.08014	38.3731	3.16e-09	0.0129758	42688000	chr20	42698000	2000	hr8_vs_unstim
chr21	26828000	26932000	52	3.41196	8.75999	35.3023	2.89e-09	0.0129758	26830000	chr21	26934000	2000	hr8_vs_unstim
chr21	26830000	26932000	51	3.7516	9.091	51.1344	1.41e-12	1.82e-05	26832000	chr21	26934000	2000	hr8_vs_unstim
chr21	26830000	26934000	52	2.91262	8.86418	32.1102	1.48e-08	0.0202951	26832000	chr21	26936000	2000	hr8_vs_unstim
chr21	26832000	26930000	49	4.51211	8.86365	50.1679	1.47e-12	1.82e-05	26834000	chr21	26932000	2000	hr8_vs_unstim
chr21	26832000	26934000	51	4.63442	8.4609	31.334	2.21e-08	0.0257722	26834000	chr21	26936000	2000	hr8_vs_unstim
chr21	26832000	26942000	55	4.86497	8.9334	32.7453	1.4e-08	0.0202951	26834000	chr21	26944000	2000	hr8_vs_unstim
chr21	26862000	26932000	35	2.83201	7.64588	34.7381	4.48e-09	0.0144837	26864000	chr21	26934000	2000	hr8_vs_unstim
chr21	26876000	26934000	29	3.25975	7.42928	30.322	3.68e-08	0.0323839	26878000	chr21	26936000	2000	hr8_vs_unstim
chr21	26894000	26926000	16	2.86417	5.68153	29.9819	4.37e-08	0.0358555	26896000	chr21	26928000	2000	hr8_vs_unstim
chr6	90954000	90972000	9	-2.39445	2.24745	32.3774	4.98e-08	0.0379522	90956000	chr6	90974000	2000	hr8_vs_unstim
chr6	90958000	90964000	3	-2.30119	2.0831	36.5155	1.66e-08	0.0208685	90960000	chr6	90966000	2000	hr8_vs_unstim
chr8	20296000	20348000	26	-3.02682	4.77692	33.9134	2.37e-08	0.0257722	20298000	chr8	20350000	2000	hr8_vs_unstim
chr8	29936000	29948000	6	-2.20614	2.69872	32.5518	1.7e-08	0.0208685	29938000	chr8	29950000	2000	hr8_vs_unstim
chr9	136548000	136562000	7	-1.70906	3.73696	34.2027	1.2e-08	0.0202951	136550000	chr9	136564000	2000	hr8_vs_unstim
chr9	136548000	136566000	9	-1.31333	4.25405	30.8121	5.87e-08	0.0413618	136550000	chr9	136568000	2000	hr8_vs_unstim
chr1	944000	1228000	71	3.47924	4.55849	24.8837	2.36e-06	0.0313749	948000	chr1	1232000	4000	hr8_vs_unstim
chr1	996000	1152000	39	3.22279	3.73475	27.104	9.36e-07	0.0192257	1000000	chr1	1156000	4000	hr8_vs_unstim
chr1	1056000	1192000	34	2.51855	3.58848	25.5056	6.14e-07	0.0151232	1060000	chr1	1196000	4000	hr8_vs_unstim
chr1	2168000	2184000	4	-1.41019	3.86275	32.3077	2.02e-07	0.00748045	2172000	chr1	2188000	4000	hr8_vs_unstim
chr1	2188000	2228000	10	-1.51679	4.04483	23.4948	2.43e-06	0.0319478	2192000	chr1	2232000	4000	hr8_vs_unstim
chr1	2188000	2232000	11	-1.61215	3.68285	22.3076	4.25e-06	0.0423597	2192000	chr1	2236000	4000	hr8_vs_unstim
chr1	2188000	2240000	13	-1.77704	3.7529	27.1989	4.39e-07	0.0122798	2192000	chr1	2244000	4000	hr8_vs_unstim
chr1	2188000	2244000	14	-1.82605	3.61413	28.3847	2.56e-07	0.00867957	2192000	chr1	2248000	4000	hr8_vs_unstim
chr1	7868000	8040000	43	3.58925	3.20315	23.379	4.47e-06	0.0434461	7872000	chr1	8044000	4000	hr8_vs_unstim
chr1	7956000	8024000	17	3.90681	2.42221	36.9775	7.59e-09	0.000997698	7960000	chr1	8028000	4000	hr8_vs_unstim
chr1	7960000	8020000	15	2.32244	3.01893	22.1466	5.19e-06	0.0468954	7964000	chr1	8024000	4000	hr8_vs_unstim
chr1	7960000	8032000	18	2.66404	2.70466	27.4794	4.64e-07	0.0127516	7964000	chr1	8036000	4000	hr8_vs_unstim
chr1	7964000	8020000	14	2.94001	2.42552	28.1955	2.79e-07	0.00921269	7968000	chr1	8024000	4000	hr8_vs_unstim
chr1	7968000	8016000	12	2.47356	2.63134	24.3956	1.6e-06	0.0260397	7972000	chr1	8020000	4000	hr8_vs_unstim
chr1	7968000	8020000	13	2.34777	2.79254	25.5722	9.27e-07	0.0191371	7972000	chr1	8024000	4000	hr8_vs_unstim
chr1	7976000	8012000	9	2.21662	2.60527	26.7483	5.84e-07	0.0146615	7980000	chr1	8016000	4000	hr8_vs_unstim
chr1	7976000	8016000	10	2.23834	3.15962	29.7868	1.35e-07	0.00599177	7980000	chr1	8020000	4000	hr8_vs_unstim
chr1	7976000	8020000	11	2.06627	3.21248	24.324	1.65e-06	0.0264557	7980000	chr1	8024000	4000	hr8_vs_unstim
chr1	9556000	9628000	18	-2.25696	2.89157	25.4846	1.13e-06	0.0214083	9560000	chr1	9632000	4000	hr8_vs_unstim
chr1	9556000	9632000	19	-2.37117	3.05485	28.5492	2.89e-07	0.00940591	9560000	chr1	9636000	4000	hr8_vs_unstim
chr1	12176000	12704000	132	5.08131	5.8939	24.5944	5.1e-06	0.0465034	12180000	chr1	12708000	4000	hr8_vs_unstim
chr1	14012000	14044000	8	-1.83571	2.65857	22.3294	4.45e-06	0.0433819	14016000	chr1	14048000	4000	hr8_vs_unstim
chr1	16148000	16332000	46	2.44161	4.52792	22.2096	5.01e-06	0.0461736	16152000	chr1	16336000	4000	hr8_vs_unstim
chr1	16160000	16292000	33	2.9787	3.27155	28.0578	1.75e-07	0.00691079	16164000	chr1	16296000	4000	hr8_vs_unstim
chr1	16160000	16316000	39	3.46463	3.49898	24.9929	2.26e-06	0.0306922	16164000	chr1	16320000	4000	hr8_vs_unstim
chr1	16160000	16324000	41	4.2314	3.0377	23.0991	5.03e-06	0.0462383	16164000	chr1	16328000	4000	hr8_vs_unstim
chr1	16160000	16332000	43	3.07555	3.75463	25.8723	1.56e-06	0.0256722	16164000	chr1	16336000	4000	hr8_vs_unstim
chr1	16168000	16324000	39	3.3545	3.52607	25.1048	2.15e-06	0.0299197	16172000	chr1	16328000	4000	hr8_vs_unstim
chr1	16184000	16332000	37	3.27899	3.5039	26.3081	1.3e-06	0.0230298	16188000	chr1	16336000	4000	hr8_vs_unstim
chr1	16236000	16324000	22	2.73351	3.02728	22.3364	3.9e-06	0.0406617	16240000	chr1	16328000	4000	hr8_vs_unstim
chr1	16244000	16384000	35	4.40731	2.16323	21.3805	4.77e-06	0.0451796	16248000	chr1	16388000	4000	hr8_vs_unstim
chr1	16248000	16260000	3	1.27852	3.57533	23.9063	5.06e-06	0.0463532	16252000	chr1	16264000	4000	hr8_vs_unstim
chr1	21352000	21500000	37	4.26693	2.68412	24.7208	2.53e-06	0.0326143	21356000	chr1	21504000	4000	hr8_vs_unstim
chr1	24812000	24828000	4	-1.32076	3.36754	24.7295	3.64e-06	0.0391007	24816000	chr1	24832000	4000	hr8_vs_unstim
chr1	24832000	24856000	6	-1.42549	3.8115	23.2854	2.86e-06	0.0346545	24836000	chr1	24860000	4000	hr8_vs_unstim
chr1	24832000	24868000	9	-1.93329	2.73451	22.193	4.75e-06	0.0450658	24836000	chr1	24872000	4000	hr8_vs_unstim
chr1	25828000	25848000	5	-1.51968	3.58222	35.6221	6.09e-08	0.00365402	25832000	chr1	25852000	4000	hr8_vs_unstim
chr1	25868000	25884000	4	-1.23661	3.61362	23.7068	5.48e-06	0.0479348	25872000	chr1	25888000	4000	hr8_vs_unstim
chr1	25868000	25888000	5	-1.24878	3.55142	23.5014	5.95e-06	0.049882	25872000	chr1	25892000	4000	hr8_vs_unstim
chr1	25872000	25884000	3	-1.14795	4.04642	25.1549	3.08e-06	0.0361162	25876000	chr1	25888000	4000	hr8_vs_unstim
chr1	25948000	25964000	4	-1.3353	3.24693	24.3183	4.29e-06	0.0425903	25952000	chr1	25968000	4000	hr8_vs_unstim
chr1	26632000	26644000	3	-1.19197	3.61433	23.661	5.58e-06	0.0482903	26636000	chr1	26648000	4000	hr8_vs_unstim
chr1	28196000	28212000	4	-1.48742	3.55193	32.9306	1.61e-07	0.00657173	28200000	chr1	28216000	4000	hr8_vs_unstim
chr1	28268000	28304000	9	-1.58839	3.46788	25.9294	8.48e-07	0.0180508	28272000	chr1	28308000	4000	hr8_vs_unstim
chr1	28832000	28844000	3	-2.02694	2.51733	38.0111	2.62e-08	0.00218682	28836000	chr1	28848000	4000	hr8_vs_unstim
chr1	31216000	31228000	3	-1.17739	4.02001	23.6651	5.57e-06	0.0482709	31220000	chr1	31232000	4000	hr8_vs_unstim
chr1	32704000	32736000	8	-1.46507	3.45249	21.8527	5.56e-06	0.0482571	32708000	chr1	32740000	4000	hr8_vs_unstim
chr1	32756000	32784000	7	-1.44511	3.70795	23.3138	2.82e-06	0.0344549	32760000	chr1	32788000	4000	hr8_vs_unstim
chr1	40844000	40860000	4	-1.65989	2.9966	31.0276	3.24e-07	0.0101408	40848000	chr1	40864000	4000	hr8_vs_unstim
chr1	40856000	40868000	3	-1.40443	3.2653	25.7346	2.45e-06	0.0320359	40860000	chr1	40872000	4000	hr8_vs_unstim
chr1	42040000	42124000	21	2.4432	3.70038	33.7724	1.96e-08	0.00178418	42044000	chr1	42128000	4000	hr8_vs_unstim
chr1	42112000	42200000	22	2.14726	3.32275	21.6229	5.48e-06	0.0479348	42116000	chr1	42204000	4000	hr8_vs_unstim
chr1	42120000	42196000	19	3.02368	2.4644	25.7967	9.85e-07	0.0198959	42124000	chr1	42200000	4000	hr8_vs_unstim
chr1	42124000	42200000	19	2.7657	3.47709	39.2802	2.89e-09	0.000531281	42128000	chr1	42204000	4000	hr8_vs_unstim
chr1	42124000	42204000	20	2.55675	3.54413	38.2571	4.43e-09	0.000722913	42128000	chr1	42208000	4000	hr8_vs_unstim
chr1	42124000	42208000	21	2.08979	3.76807	23.8251	1.93e-06	0.0285205	42128000	chr1	42212000	4000	hr8_vs_unstim
chr1	42124000	42216000	23	2.08361	3.65526	24.4137	1.46e-06	0.024647	42128000	chr1	42220000	4000	hr8_vs_unstim
chr1	42128000	42188000	15	2.18766	3.37464	24.5945	1.7e-06	0.0267634	42132000	chr1	42192000	4000	hr8_vs_unstim
chr1	42128000	42208000	20	2.73027	3.27966	35.65	1.33e-08	0.0013317	42132000	chr1	42212000	4000	hr8_vs_unstim
chr1	42132000	42200000	17	2.17995	3.4771	25.9734	9.1e-07	0.0189161	42136000	chr1	42204000	4000	hr8_vs_unstim
chr1	42132000	42272000	35	2.51486	3.45101	21.226	5.15e-06	0.0467189	42136000	chr1	42276000	4000	hr8_vs_unstim
chr1	42136000	42244000	27	2.72656	3.02964	23.7298	2.01e-06	0.0291476	42140000	chr1	42248000	4000	hr8_vs_unstim
chr1	42188000	42272000	21	2.46923	3.52732	29.3371	1.48e-07	0.00624722	42192000	chr1	42276000	4000	hr8_vs_unstim
chr1	42204000	42272000	17	2.26564	3.19242	27.3751	4.86e-07	0.0130506	42208000	chr1	42276000	4000	hr8_vs_unstim
chr1	42216000	42268000	13	2.37429	2.96308	28.6049	2.31e-07	0.00828031	42220000	chr1	42272000	4000	hr8_vs_unstim
chr1	42216000	42272000	14	2.1553	3.24311	29.9714	1.25e-07	0.00571052	42220000	chr1	42276000	4000	hr8_vs_unstim
chr1	42220000	42244000	6	1.59869	3.65314	24.1088	1.95e-06	0.028704	42224000	chr1	42248000	4000	hr8_vs_unstim
chr1	42220000	42268000	12	1.93295	3.18714	23.1334	2.88e-06	0.0348654	42224000	chr1	42272000	4000	hr8_vs_unstim
chr1	42220000	42272000	13	2.08875	3.38142	31.5382	6.16e-08	0.00367979	42224000	chr1	42276000	4000	hr8_vs_unstim
chr1	42228000	42244000	4	1.51389	3.34514	24.9267	3.37e-06	0.0377606	42232000	chr1	42248000	4000	hr8_vs_unstim
chr1	45264000	45284000	5	-1.30714	3.86965	28.5517	8.23e-07	0.0177712	45268000	chr1	45288000	4000	hr8_vs_unstim
chr1	59248000	59280000	8	-1.66003	2.84527	21.8438	5.59e-06	0.0482925	59252000	chr1	59284000	4000	hr8_vs_unstim
chr1	62192000	62240000	12	-2.02184	2.90644	22.6186	3.67e-06	0.039238	62196000	chr1	62244000	4000	hr8_vs_unstim
chr1	67276000	67456000	45	3.88747	3.57261	25.7472	9.99e-07	0.0199982	67280000	chr1	67460000	4000	hr8_vs_unstim
chr1	67456000	67612000	39	-1.7963	4.78179	23.0775	5.08e-06	0.0464533	67460000	chr1	67616000	4000	hr8_vs_unstim
chr1	68020000	68148000	32	2.89056	2.9339	21.5452	4.39e-06	0.0430477	68024000	chr1	68152000	4000	hr8_vs_unstim
chr1	70820000	70876000	14	-2.29988	3.14794	35.4682	1.08e-08	0.00120826	70824000	chr1	70880000	4000	hr8_vs_unstim
chr1	77680000	78244000	141	-4.50361	6.46105	20.8789	4.91e-06	0.0457564	77684000	chr1	78248000	4000	hr8_vs_unstim
chr1	85244000	85356000	28	3.0265	3.04591	22.5255	2.69e-06	0.0335693	85248000	chr1	85360000	4000	hr8_vs_unstim
chr1	89684000	89800000	29	-3.73719	2.38721	22.4266	2.83e-06	0.0344549	89688000	chr1	89804000	4000	hr8_vs_unstim
chr1	90308000	90332000	6	-1.48331	3.30327	21.9526	5.31e-06	0.0473375	90312000	chr1	90336000	4000	hr8_vs_unstim
chr1	100808000	100932000	31	-3.02318	2.73356	22.5977	2.6e-06	0.0330112	100812000	chr1	100936000	4000	hr8_vs_unstim
chr1	100864000	100904000	10	-1.66366	3.27275	21.9434	5.04e-06	0.0462774	100868000	chr1	100908000	4000	hr8_vs_unstim
chr1	101384000	101576000	48	-2.48985	4.51966	26.8884	5.98e-07	0.0148481	101388000	chr1	101580000	4000	hr8_vs_unstim
chr1	101388000	101576000	47	-2.83659	4.63447	40.6443	1.61e-09	0.000348602	101392000	chr1	101580000	4000	hr8_vs_unstim
chr1	101392000	101572000	45	-2.18875	4.94059	29.3532	2e-07	0.00745937	101396000	chr1	101576000	4000	hr8_vs_unstim
chr1	101392000	101576000	46	-2.17913	4.84024	25.2123	1.27e-06	0.0228215	101396000	chr1	101580000	4000	hr8_vs_unstim
chr1	101576000	101592000	4	-1.84239	3.03806	38.201	2.46e-08	0.00208	101580000	chr1	101596000	4000	hr8_vs_unstim
chr1	101576000	101700000	31	-3.14041	3.99015	55.7291	3.58e-13	9.42e-07	101580000	chr1	101704000	4000	hr8_vs_unstim
chr1	101576000	101704000	32	-1.98301	3.82357	22.8972	2.24e-06	0.0305433	101580000	chr1	101708000	4000	hr8_vs_unstim
chr1	101576000	101752000	44	-2.33912	4.39078	26.9493	9.98e-07	0.0199885	101580000	chr1	101756000	4000	hr8_vs_unstim
chr1	101580000	101592000	3	-1.66742	3.26297	37.3749	3.28e-08	0.00251274	101584000	chr1	101596000	4000	hr8_vs_unstim
chr1	101620000	101704000	21	2.0354	3.69128	21.8523	4.91e-06	0.0457789	101624000	chr1	101708000	4000	hr8_vs_unstim
chr1	101708000	101724000	4	-1.3918	3.26558	25.8625	2.33e-06	0.0311519	101712000	chr1	101728000	4000	hr8_vs_unstim
chr1	101708000	101744000	9	-1.6755	3.31869	25.8384	8.84e-07	0.0185933	101712000	chr1	101748000	4000	hr8_vs_unstim
chr1	101712000	101724000	3	-1.32024	3.36661	23.8402	5.19e-06	0.0468954	101716000	chr1	101728000	4000	hr8_vs_unstim
chr1	111728000	111760000	8	-1.74757	2.9321	23.8495	2.2e-06	0.0303382	111732000	chr1	111764000	4000	hr8_vs_unstim
chr1	111740000	111760000	5	-1.3299	3.58147	27.6605	1.16e-06	0.0216582	111744000	chr1	111764000	4000	hr8_vs_unstim
chr1	111744000	111760000	4	-1.32621	3.58993	28.2358	9.29e-07	0.0191492	111748000	chr1	111764000	4000	hr8_vs_unstim
chr1	115604000	115640000	9	-1.51604	3.47843	23.0949	3.12e-06	0.0363281	115608000	chr1	115644000	4000	hr8_vs_unstim
chr1	115608000	115640000	8	-1.85441	3.48908	33.0752	3.48e-08	0.00261023	115612000	chr1	115644000	4000	hr8_vs_unstim
chr1	115616000	115632000	4	-1.54093	3.16247	29.9143	4.91e-07	0.0131454	115620000	chr1	115636000	4000	hr8_vs_unstim
chr1	116772000	117024000	63	-2.05228	5.45875	28.7029	6.39e-07	0.0154693	116776000	chr1	117028000	4000	hr8_vs_unstim
chr1	116780000	116880000	25	-2.32551	3.11586	22.3964	3.79e-06	0.0399975	116784000	chr1	116884000	4000	hr8_vs_unstim
chr1	116784000	116916000	33	-4.23324	2.24611	22.2337	3.11e-06	0.0363112	116788000	chr1	116920000	4000	hr8_vs_unstim
chr1	116868000	116888000	5	-1.68148	2.6438	23.9976	4.88e-06	0.0456573	116872000	chr1	116892000	4000	hr8_vs_unstim
chr1	116908000	117028000	30	3.21993	3.06372	22.1583	3.23e-06	0.0368599	116912000	chr1	117032000	4000	hr8_vs_unstim
chr1	117268000	117304000	9	2.12651	2.52639	25.286	1.14e-06	0.0214083	117272000	chr1	117308000	4000	hr8_vs_unstim
chr1	117280000	117592000	78	-2.18518	6.4731	32.3353	8.93e-08	0.00469653	117284000	chr1	117596000	4000	hr8_vs_unstim
chr1	145424000	145436000	3	-1.42514	3.48261	31.4157	2.81e-07	0.00922436	145428000	chr1	145440000	4000	hr8_vs_unstim
chr1	149932000	150012000	20	1.67562	4.03859	22.9219	3.64e-06	0.0390622	149936000	chr1	150016000	4000	hr8_vs_unstim
chr1	151000000	151032000	8	-1.88198	2.70017	22.7276	3.7e-06	0.0394052	151004000	chr1	151036000	4000	hr8_vs_unstim
chr1	154912000	154924000	3	-1.19337	3.74595	23.5151	5.92e-06	0.0497165	154916000	chr1	154928000	4000	hr8_vs_unstim
chr1	156864000	156936000	18	-2.74621	2.71926	27.475	4.65e-07	0.0127633	156868000	chr1	156940000	4000	hr8_vs_unstim
chr1	159880000	159892000	3	-1.32477	3.46128	25.0867	3.16e-06	0.0364648	159884000	chr1	159896000	4000	hr8_vs_unstim
chr1	160700000	160916000	54	-2.49384	4.18517	22.3254	4.75e-06	0.0450855	160704000	chr1	160920000	4000	hr8_vs_unstim
chr1	166956000	167016000	15	1.94196	3.63914	26.0304	8.87e-07	0.0186192	166960000	chr1	167020000	4000	hr8_vs_unstim
chr1	167460000	167476000	4	-1.33367	3.6319	26.7909	1.62e-06	0.0262662	167464000	chr1	167480000	4000	hr8_vs_unstim
chr1	167464000	167476000	3	-1.42094	3.89254	34.8516	8.02e-08	0.00443533	167468000	chr1	167480000	4000	hr8_vs_unstim
chr1	172788000	173172000	96	2.89433	5.90518	25.4597	2.11e-06	0.0297629	172792000	chr1	173176000	4000	hr8_vs_unstim
chr1	173388000	173792000	101	-2.74008	6.02041	24.503	3.14e-06	0.0363705	173392000	chr1	173796000	4000	hr8_vs_unstim
chr1	182056000	182108000	13	-2.48808	2.68911	28.7535	2.16e-07	0.00786608	182060000	chr1	182112000	4000	hr8_vs_unstim
chr1	182572000	182680000	27	2.4251	3.44629	26.521	5.44e-07	0.0140612	182576000	chr1	182684000	4000	hr8_vs_unstim
chr1	182576000	182696000	30	3.22294	2.91451	22.2061	3.16e-06	0.036436	182580000	chr1	182700000	4000	hr8_vs_unstim
chr1	182580000	182680000	25	2.12011	3.569	21.4669	5.91e-06	0.0497062	182584000	chr1	182684000	4000	hr8_vs_unstim
chr1	182692000	182748000	14	2.77969	2.45731	24.4535	1.56e-06	0.0256722	182696000	chr1	182752000	4000	hr8_vs_unstim
chr1	185212000	185284000	18	-2.87232	2.29872	27.3855	4.84e-07	0.0130162	185216000	chr1	185288000	4000	hr8_vs_unstim
chr1	185252000	185276000	6	-2.09964	2.51545	25.1068	1.23e-06	0.0225472	185256000	chr1	185280000	4000	hr8_vs_unstim
chr1	185284000	185532000	62	-3.44702	4.13349	29.5948	4.51e-07	0.0124908	185288000	chr1	185536000	4000	hr8_vs_unstim
chr1	185284000	185636000	88	-2.66573	5.48815	23.8757	3.13e-06	0.0363705	185288000	chr1	185640000	4000	hr8_vs_unstim
chr1	185528000	185640000	28	-2.79142	3.03701	23.4774	1.68e-06	0.0266244	185532000	chr1	185644000	4000	hr8_vs_unstim
chr1	192508000	192540000	8	-1.6531	3.32214	25.0556	1.26e-06	0.0227845	192512000	chr1	192544000	4000	hr8_vs_unstim
chr1	198472000	198712000	60	-3.06517	4.40795	26.8006	1.35e-06	0.0235573	198476000	chr1	198716000	4000	hr8_vs_unstim
chr1	198548000	198572000	6	-1.45014	3.46732	21.9062	5.43e-06	0.0477191	198552000	chr1	198576000	4000	hr8_vs_unstim
chr1	198584000	198612000	7	-1.91173	2.91261	26.8607	5.55e-07	0.0142261	198588000	chr1	198616000	4000	hr8_vs_unstim
chr1	198592000	198628000	9	-1.7743	2.80459	23.9282	2.12e-06	0.0298233	198596000	chr1	198632000	4000	hr8_vs_unstim
chr1	198600000	198628000	7	-2.07007	2.43715	24.2397	1.84e-06	0.0278268	198604000	chr1	198632000	4000	hr8_vs_unstim
chr1	198628000	198644000	4	-1.58727	3.15839	32.4069	1.95e-07	0.00735975	198632000	chr1	198648000	4000	hr8_vs_unstim
chr1	198632000	198644000	3	-1.37889	3.3521	25.3554	2.84e-06	0.034594	198636000	chr1	198648000	4000	hr8_vs_unstim
chr1	198672000	198704000	8	-1.68858	3.07795	24.1838	1.89e-06	0.0281767	198676000	chr1	198708000	4000	hr8_vs_unstim
chr1	198684000	198720000	9	-2.07613	2.64804	27.8237	3.59e-07	0.0107562	198688000	chr1	198724000	4000	hr8_vs_unstim
chr1	198688000	198720000	8	-2.13131	2.50472	27.9202	3.44e-07	0.010431	198692000	chr1	198724000	4000	hr8_vs_unstim
chr1	198900000	199196000	74	6.31604	4.02771	26.8921	1.02e-06	0.0202533	198904000	chr1	199200000	4000	hr8_vs_unstim
chr1	199064000	199212000	37	3.38967	3.18541	23.5474	4.16e-06	0.0419426	199068000	chr1	199216000	4000	hr8_vs_unstim
chr1	203276000	203296000	5	-1.35917	3.72303	30.5085	3.93e-07	0.0114066	203280000	chr1	203300000	4000	hr8_vs_unstim
chr1	207012000	207124000	28	-3.25907	2.95396	28.7533	1.24e-07	0.00571052	207016000	chr1	207128000	4000	hr8_vs_unstim
chr1	207056000	207112000	14	-2.4225	2.54411	24.4651	1.55e-06	0.0256004	207060000	chr1	207116000	4000	hr8_vs_unstim
chr1	207076000	207104000	7	-1.83117	3.14143	29.5197	1.68e-07	0.00674564	207080000	chr1	207108000	4000	hr8_vs_unstim
chr1	207080000	207092000	3	-1.88636	3.08609	41.7134	7.38e-09	0.000982096	207084000	chr1	207096000	4000	hr8_vs_unstim
chr1	207084000	207096000	3	-1.33694	3.59899	26.3373	1.93e-06	0.0285419	207088000	chr1	207100000	4000	hr8_vs_unstim
chr1	207084000	207104000	5	-1.26192	3.63727	23.7214	5.45e-06	0.0478029	207088000	chr1	207108000	4000	hr8_vs_unstim
chr1	207220000	207248000	7	-1.46786	4.05116	27.7134	3.78e-07	0.0111185	207224000	chr1	207252000	4000	hr8_vs_unstim
chr1	207420000	207528000	27	-3.36534	2.44544	24.0644	1.72e-06	0.0270132	207424000	chr1	207532000	4000	hr8_vs_unstim
chr1	207624000	207668000	11	-2.01592	2.87106	22.1569	4.56e-06	0.0439542	207628000	chr1	207672000	4000	hr8_vs_unstim
chr1	207624000	207672000	12	-2.0582	2.74399	22.5111	3.86e-06	0.0403854	207628000	chr1	207676000	4000	hr8_vs_unstim
chr1	207884000	207968000	21	-2.46447	2.8768	22.1115	4.34e-06	0.0428111	207888000	chr1	207972000	4000	hr8_vs_unstim
chr1	209820000	209916000	24	2.80732	2.87908	22.9638	2.9e-06	0.0349071	209824000	chr1	209920000	4000	hr8_vs_unstim
chr1	212632000	212836000	51	3.03588	3.92064	22.5655	4.25e-06	0.0423748	212636000	chr1	212840000	4000	hr8_vs_unstim
chr1	212636000	212808000	43	3.06107	3.59513	23.5915	4.08e-06	0.0414578	212640000	chr1	212812000	4000	hr8_vs_unstim
chr1	212636000	212812000	44	2.56211	3.95977	22.8117	5.69e-06	0.0487781	212640000	chr1	212816000	4000	hr8_vs_unstim
chr1	212640000	212860000	55	3.81348	4.435	32.2386	1.64e-07	0.00665978	212644000	chr1	212864000	4000	hr8_vs_unstim
chr1	212644000	212840000	49	2.74389	4.30659	22.3057	4.79e-06	0.0452887	212648000	chr1	212844000	4000	hr8_vs_unstim
chr1	212648000	212784000	34	2.6043	3.45222	24.1989	1.17e-06	0.0218052	212652000	chr1	212788000	4000	hr8_vs_unstim
chr1	212648000	212788000	35	2.37725	3.58307	21.195	5.23e-06	0.047035	212652000	chr1	212792000	4000	hr8_vs_unstim
chr1	212648000	212796000	37	2.4213	4.13141	23.6078	4.05e-06	0.0413269	212652000	chr1	212800000	4000	hr8_vs_unstim
chr1	212648000	212844000	49	3.02961	4.12419	30.8041	1.06e-07	0.00519122	212652000	chr1	212848000	4000	hr8_vs_unstim
chr1	212652000	212812000	40	2.56393	4.3432	28.7586	4.75e-07	0.0129078	212656000	chr1	212816000	4000	hr8_vs_unstim
chr1	212652000	212820000	42	2.86034	4.0425	29.0429	4.23e-07	0.011989	212656000	chr1	212824000	4000	hr8_vs_unstim
chr1	212660000	212796000	34	3.38901	3.41246	32.5347	1.98e-08	0.00179225	212664000	chr1	212800000	4000	hr8_vs_unstim
chr1	212660000	212816000	39	2.89712	3.67297	24.8513	2.39e-06	0.0315832	212664000	chr1	212820000	4000	hr8_vs_unstim
chr1	212660000	212840000	45	3.11444	4.22822	25.9423	9.15e-07	0.0189816	212664000	chr1	212844000	4000	hr8_vs_unstim
chr1	212664000	212716000	13	2.40339	2.88871	24.65	1.42e-06	0.0243172	212668000	chr1	212720000	4000	hr8_vs_unstim
chr1	212668000	212796000	32	2.65006	3.40448	25.6075	5.83e-07	0.0146557	212672000	chr1	212800000	4000	hr8_vs_unstim
chr1	212668000	212816000	37	2.93321	3.74441	23.8513	3.65e-06	0.0391382	212672000	chr1	212820000	4000	hr8_vs_unstim
chr1	212676000	212804000	32	2.74989	3.54459	21.4544	4.6e-06	0.0442259	212680000	chr1	212808000	4000	hr8_vs_unstim
chr1	213840000	214024000	46	-3.40929	3.7358	28.1821	3.36e-07	0.0103406	213844000	chr1	214028000	4000	hr8_vs_unstim
chr1	213840000	214288000	112	-3.03938	6.39637	25.2943	1.84e-06	0.0278268	213844000	chr1	214292000	4000	hr8_vs_unstim
chr1	213968000	214044000	19	-2.74148	2.6763	28.2295	3.32e-07	0.0102482	213972000	chr1	214048000	4000	hr8_vs_unstim
chr1	226172000	226264000	23	-3.01587	2.57192	24.3833	1.48e-06	0.0248413	226176000	chr1	226268000	4000	hr8_vs_unstim
chr1	226180000	226248000	17	-1.8627	3.34517	23.8543	2.37e-06	0.0314487	226184000	chr1	226252000	4000	hr8_vs_unstim
chr1	226608000	226804000	49	-3.2227	3.84388	26.8309	6.14e-07	0.0151232	226612000	chr1	226808000	4000	hr8_vs_unstim
chr1	227948000	228132000	46	-1.91826	5.72334	30.9405	9.98e-08	0.00500216	227952000	chr1	228136000	4000	hr8_vs_unstim
chr1	231052000	231116000	16	-2.31537	3.03934	26.8121	6.25e-07	0.0152106	231056000	chr1	231120000	4000	hr8_vs_unstim
chr1	234524000	234544000	5	-1.53705	3.01099	25.2348	2.98e-06	0.035465	234528000	chr1	234548000	4000	hr8_vs_unstim
chr1	235140000	235152000	3	-1.68837	2.76526	29.7204	5.29e-07	0.0137836	235144000	chr1	235156000	4000	hr8_vs_unstim
chr1	244992000	245124000	33	-2.25398	3.53865	23.1514	1.97e-06	0.0288568	244996000	chr1	245128000	4000	hr8_vs_unstim
chr1	245000000	245028000	7	-1.79221	3.01307	26.5254	6.46e-07	0.0155394	245004000	chr1	245032000	4000	hr8_vs_unstim
chr10	1092000	1108000	4	-1.48576	3.6223	22.3989	2.74e-06	0.0338941	1096000	chr10	1112000	4000	hr8_vs_unstim
chr10	3840000	4172000	83	3.6197	5.64498	21.9051	4.98e-06	0.0459625	3844000	chr10	4176000	4000	hr8_vs_unstim
chr10	6204000	6240000	9	-1.63109	4.08146	25.9377	1.06e-06	0.0206892	6208000	chr10	6244000	4000	hr8_vs_unstim
chr10	6584000	6596000	3	-1.15392	4.45102	21.0224	5.48e-06	0.0479348	6588000	chr10	6600000	4000	hr8_vs_unstim
chr10	6620000	6636000	4	-1.86439	3.91622	41.8867	1.95e-10	6.97e-05	6624000	chr10	6640000	4000	hr8_vs_unstim
chr10	6620000	6640000	5	-1.54948	4.27644	37.4051	1.69e-09	0.000359371	6624000	chr10	6644000	4000	hr8_vs_unstim
chr10	6624000	6640000	4	-1.44481	4.27071	32.0133	2.33e-08	0.001996	6628000	chr10	6644000	4000	hr8_vs_unstim
chr10	11184000	11212000	7	-1.77444	4.19379	31.0181	1.17e-07	0.00556803	11188000	chr10	11216000	4000	hr8_vs_unstim
chr10	11188000	11204000	4	-1.70719	3.94492	36.8226	2.24e-09	0.000443181	11192000	chr10	11208000	4000	hr8_vs_unstim
chr10	11200000	11292000	23	3.02037	3.68091	24.6465	8.96e-07	0.0187191	11204000	chr10	11296000	4000	hr8_vs_unstim
chr10	13200000	13392000	48	-2.74804	5.32109	33.0223	9.12e-09	0.00112262	13204000	chr10	13396000	4000	hr8_vs_unstim
chr10	14308000	14504000	49	3.28898	4.63272	20.5774	5.73e-06	0.0489066	14312000	chr10	14508000	4000	hr8_vs_unstim
chr10	14592000	14604000	3	-1.24704	4.14935	21.3026	4.76e-06	0.045114	14596000	chr10	14608000	4000	hr8_vs_unstim
chr10	14616000	14628000	3	-1.34168	4.04096	23.227	1.81e-06	0.0276236	14620000	chr10	14632000	4000	hr8_vs_unstim
chr10	15216000	15232000	4	-1.42715	3.9636	23.2673	1.77e-06	0.027406	15220000	chr10	15236000	4000	hr8_vs_unstim
chr10	17240000	17268000	7	-1.36228	4.4109	22.2317	5.54e-06	0.0482194	17244000	chr10	17272000	4000	hr8_vs_unstim
chr10	17240000	17272000	8	-1.56084	4.18273	26.0816	9.95e-07	0.0199708	17244000	chr10	17276000	4000	hr8_vs_unstim
chr10	17244000	17268000	6	-1.44002	4.33787	23.1294	3.7e-06	0.0393967	17248000	chr10	17272000	4000	hr8_vs_unstim
chr10	17244000	17272000	7	-1.59224	3.97107	23.6406	2.94e-06	0.0352271	17248000	chr10	17276000	4000	hr8_vs_unstim
chr10	17248000	17260000	3	-1.21437	4.50883	24.8059	8.21e-07	0.0177371	17252000	chr10	17264000	4000	hr8_vs_unstim
chr10	17248000	17268000	5	-1.22525	4.12818	22.3177	2.85e-06	0.0346431	17252000	chr10	17272000	4000	hr8_vs_unstim
chr10	17252000	17268000	4	-1.42137	4.1066	28.5427	1.28e-07	0.005768	17256000	chr10	17272000	4000	hr8_vs_unstim
chr10	17452000	17464000	3	-1.22463	4.54268	25.135	6.96e-07	0.0161869	17456000	chr10	17468000	4000	hr8_vs_unstim
chr10	17452000	17468000	4	-1.34294	4.65634	31.0586	3.72e-08	0.00268923	17456000	chr10	17472000	4000	hr8_vs_unstim
chr10	21920000	22136000	54	-3.31659	4.40613	22.6888	1.91e-06	0.028374	21924000	chr10	22140000	4000	hr8_vs_unstim
chr10	21948000	22088000	35	-3.77662	3.51046	26.1464	3.31e-07	0.0102406	21952000	chr10	22092000	4000	hr8_vs_unstim
chr10	22012000	22164000	38	-4.57114	4.04124	32.97	5.32e-08	0.00339485	22016000	chr10	22168000	4000	hr8_vs_unstim
chr10	22024000	22052000	7	-1.52731	4.17753	23.8527	2.67e-06	0.0334143	22028000	chr10	22056000	4000	hr8_vs_unstim
chr10	22028000	22060000	8	-2.29587	3.38431	33.5458	4.04e-08	0.00283024	22032000	chr10	22064000	4000	hr8_vs_unstim
chr10	22032000	22044000	3	-1.16643	4.61106	23.2336	1.8e-06	0.0276013	22036000	chr10	22048000	4000	hr8_vs_unstim
chr10	22032000	22052000	5	-1.61106	3.9718	32.8442	1.55e-08	0.00150201	22036000	chr10	22056000	4000	hr8_vs_unstim
chr10	22032000	22056000	6	-1.58704	4.05665	23.4423	3.21e-06	0.0367127	22036000	chr10	22060000	4000	hr8_vs_unstim
chr10	22036000	22048000	3	-1.48416	4.3656	33.4707	1.14e-08	0.00126078	22040000	chr10	22052000	4000	hr8_vs_unstim
chr10	22064000	22080000	4	-1.44226	3.75344	22.8756	2.16e-06	0.0299197	22068000	chr10	22084000	4000	hr8_vs_unstim
chr10	22900000	22940000	10	-1.54782	4.44103	22.5408	5.03e-06	0.0462383	22904000	chr10	22944000	4000	hr8_vs_unstim
chr10	22912000	22928000	4	-1.36338	3.87574	22.483	2.63e-06	0.0331963	22916000	chr10	22932000	4000	hr8_vs_unstim
chr10	24904000	25008000	26	-3.19524	3.04906	21.1944	5.05e-06	0.0463449	24908000	chr10	25012000	4000	hr8_vs_unstim
chr10	24916000	25012000	24	-2.53379	3.77261	23.1617	1.88e-06	0.0281681	24920000	chr10	25016000	4000	hr8_vs_unstim
chr10	24928000	25016000	22	-2.87795	3.35858	21.8492	3.64e-06	0.0390622	24932000	chr10	25020000	4000	hr8_vs_unstim
chr10	26756000	26768000	3	-1.24084	4.25221	22.4989	2.6e-06	0.033056	26760000	chr10	26772000	4000	hr8_vs_unstim
chr10	31864000	32048000	46	3.86311	4.53568	21.7125	3.17e-06	0.0365102	31868000	chr10	32052000	4000	hr8_vs_unstim
chr10	64396000	64420000	6	1.8212	4.26186	32.2073	7.1e-08	0.00407572	64400000	chr10	64424000	4000	hr8_vs_unstim
chr10	64440000	64572000	33	3.13481	4.57058	38.5696	5.82e-10	0.000162761	64444000	chr10	64576000	4000	hr8_vs_unstim
chr10	64444000	64572000	32	2.74524	4.41866	27.9269	1.33e-07	0.00592642	64448000	chr10	64576000	4000	hr8_vs_unstim
chr10	64448000	64572000	31	2.06253	5.02357	23.3806	1.38e-06	0.0238415	64452000	chr10	64576000	4000	hr8_vs_unstim
chr10	73472000	73484000	3	-1.09071	4.70296	20.9706	5.63e-06	0.0484779	73476000	chr10	73488000	4000	hr8_vs_unstim
chr10	73516000	73528000	3	-1.14251	4.88035	25.8943	4.77e-07	0.0129141	73520000	chr10	73532000	4000	hr8_vs_unstim
chr10	74044000	74064000	5	-1.52106	3.9107	26.309	3.88e-07	0.0113191	74048000	chr10	74068000	4000	hr8_vs_unstim
chr10	74056000	74092000	9	-1.5415	4.33828	24.5867	1.93e-06	0.0285205	74060000	chr10	74096000	4000	hr8_vs_unstim
chr10	74060000	74092000	8	-1.56798	4.21264	23.8927	2.63e-06	0.0331963	74064000	chr10	74096000	4000	hr8_vs_unstim
chr10	74076000	74088000	3	-1.29974	4.09829	22.6969	2.36e-06	0.0313749	74080000	chr10	74092000	4000	hr8_vs_unstim
chr10	74076000	74092000	4	-1.42309	4.09638	26.7158	3.17e-07	0.00995919	74080000	chr10	74096000	4000	hr8_vs_unstim
chr10	75912000	75960000	12	-2.40503	3.18868	25.2554	1.51e-06	0.0251149	75916000	chr10	75964000	4000	hr8_vs_unstim
chr10	75916000	75988000	18	-2.42022	3.4882	21.92	4.76e-06	0.045114	75920000	chr10	75992000	4000	hr8_vs_unstim
chr10	81948000	81960000	3	-1.20491	4.5352	24.7789	8.32e-07	0.0178428	81952000	chr10	81964000	4000	hr8_vs_unstim
chr10	82224000	82244000	5	-1.66192	3.68647	30.1133	5.92e-08	0.00360613	82228000	chr10	82248000	4000	hr8_vs_unstim
chr10	82232000	82244000	3	-1.23086	4.20525	21.0668	5.36e-06	0.0475545	82236000	chr10	82248000	4000	hr8_vs_unstim
chr10	85904000	85960000	14	-1.8393	4.0336	23.4956	3.28e-06	0.0372525	85908000	chr10	85964000	4000	hr8_vs_unstim
chr10	85904000	85964000	15	-1.98089	4.64032	31.912	4.55e-08	0.00305009	85908000	chr10	85968000	4000	hr8_vs_unstim
chr10	85908000	85964000	14	-1.71139	4.61028	27.7545	5.08e-07	0.0133782	85912000	chr10	85968000	4000	hr8_vs_unstim
chr10	85916000	85960000	11	-1.71931	4.20912	22.9045	4.27e-06	0.0425022	85920000	chr10	85964000	4000	hr8_vs_unstim
chr10	89624000	89824000	50	-2.84106	4.78132	21.409	3.71e-06	0.0395	89628000	chr10	89828000	4000	hr8_vs_unstim
chr10	90444000	90556000	28	2.61223	4.40177	23.3606	1.39e-06	0.0240267	90448000	chr10	90560000	4000	hr8_vs_unstim
chr10	90444000	90564000	30	2.89562	4.83503	29.7029	5.34e-08	0.00339485	90448000	chr10	90568000	4000	hr8_vs_unstim
chr10	90448000	90552000	26	2.57997	3.85638	20.9826	5.62e-06	0.0484779	90452000	chr10	90556000	4000	hr8_vs_unstim
chr10	90448000	90576000	32	3.48899	4.69597	39.3667	3.89e-10	0.000119865	90452000	chr10	90580000	4000	hr8_vs_unstim
chr10	90452000	90556000	26	2.56494	3.97917	21.5889	4.14e-06	0.0419014	90456000	chr10	90560000	4000	hr8_vs_unstim
chr10	90452000	90576000	31	3.09108	4.3724	25.3976	4.87e-07	0.0130699	90456000	chr10	90580000	4000	hr8_vs_unstim
chr10	90456000	90568000	28	3.07388	4.17246	23.5413	1.27e-06	0.0228063	90460000	chr10	90572000	4000	hr8_vs_unstim
chr10	90456000	90572000	29	3.16043	4.26879	24.8845	6.35e-07	0.0154077	90460000	chr10	90576000	4000	hr8_vs_unstim
chr10	90464000	90580000	29	3.36083	3.76984	22.9895	1.69e-06	0.0267367	90468000	chr10	90584000	4000	hr8_vs_unstim
chr10	90480000	90564000	21	3.3556	3.31207	23.2041	1.84e-06	0.0278268	90484000	chr10	90568000	4000	hr8_vs_unstim
chr10	90496000	90564000	17	2.85383	3.43174	25.1869	1.01e-06	0.0201629	90500000	chr10	90568000	4000	hr8_vs_unstim
chr10	99048000	99104000	14	-2.25111	3.84099	30.2463	1.75e-07	0.00691079	99052000	chr10	99108000	4000	hr8_vs_unstim
chr10	99164000	99220000	14	1.97287	4.06038	25.1527	1.58e-06	0.025825	99168000	chr10	99224000	4000	hr8_vs_unstim
chr10	103816000	103908000	23	-2.71261	3.51704	23.9872	1.24e-06	0.0226365	103820000	chr10	103912000	4000	hr8_vs_unstim
chr10	105180000	105240000	15	-1.74244	4.52568	23.4638	2.28e-06	0.0307863	105184000	chr10	105244000	4000	hr8_vs_unstim
chr10	112068000	112172000	26	2.55015	4.0931	28.7956	1.15e-07	0.00547625	112072000	chr10	112176000	4000	hr8_vs_unstim
chr10	112076000	112220000	36	3.03847	4.83627	31.5184	9.79e-08	0.00493588	112080000	chr10	112224000	4000	hr8_vs_unstim
chr10	112112000	112256000	36	2.29237	5.62948	30.2897	1.65e-07	0.00667774	112116000	chr10	112260000	4000	hr8_vs_unstim
chr10	112112000	112260000	37	2.38176	5.46378	29.2939	2.52e-07	0.00864688	112116000	chr10	112264000	4000	hr8_vs_unstim
chr10	112124000	112256000	33	2.27096	4.59608	21.1403	4.4e-06	0.0430704	112128000	chr10	112260000	4000	hr8_vs_unstim
chr10	112148000	112168000	5	1.62871	4.01242	30.2294	5.59e-08	0.0035199	112152000	chr10	112172000	4000	hr8_vs_unstim
chr10	112160000	112252000	23	2.71131	3.61015	22.6774	2.4e-06	0.031595	112164000	chr10	112256000	4000	hr8_vs_unstim
chr10	112172000	112288000	29	2.74919	4.50934	26.4697	2.81e-07	0.00922436	112176000	chr10	112292000	4000	hr8_vs_unstim
chr10	112184000	112200000	4	1.40732	4.11171	23.6746	1.44e-06	0.0245547	112188000	chr10	112204000	4000	hr8_vs_unstim
chr10	112192000	112204000	3	1.18942	4.57205	21.0988	5.27e-06	0.0472097	112196000	chr10	112208000	4000	hr8_vs_unstim
chr10	112232000	112252000	5	1.53818	3.71228	23.2533	1.78e-06	0.0274992	112236000	chr10	112256000	4000	hr8_vs_unstim
chr10	112256000	112300000	11	1.78126	4.1068	22.9947	4.1e-06	0.0416536	112260000	chr10	112304000	4000	hr8_vs_unstim
chr10	112520000	112536000	4	-1.43545	3.80591	23.0323	1.99e-06	0.0289801	112524000	chr10	112540000	4000	hr8_vs_unstim
chr10	112576000	112632000	14	-2.26995	3.59508	24.2261	2.37e-06	0.0314487	112580000	chr10	112636000	4000	hr8_vs_unstim
chr10	112592000	112620000	7	-1.97033	4.0647	37.9408	6.57e-09	0.000918414	112596000	chr10	112624000	4000	hr8_vs_unstim
chr10	112592000	112628000	9	-1.44598	4.31062	22.1323	5.8e-06	0.0492361	112596000	chr10	112632000	4000	hr8_vs_unstim
chr10	112596000	112608000	3	-1.17296	4.48464	22.0693	3.23e-06	0.0368599	112600000	chr10	112612000	4000	hr8_vs_unstim
chr10	112616000	112632000	4	-1.3902	3.86372	22.8067	2.23e-06	0.0305403	112620000	chr10	112636000	4000	hr8_vs_unstim
chr10	112620000	112632000	3	-1.24614	4.35937	24.0186	1.22e-06	0.022342	112624000	chr10	112636000	4000	hr8_vs_unstim
chr10	112632000	112644000	3	-1.18763	4.45758	23.656	1.46e-06	0.024647	112636000	chr10	112648000	4000	hr8_vs_unstim
chr10	112636000	112652000	4	-1.39018	3.7361	21.9104	3.5e-06	0.0384043	112640000	chr10	112656000	4000	hr8_vs_unstim
chr10	112644000	112656000	3	-1.36441	4.05097	23.7083	1.42e-06	0.0243127	112648000	chr10	112660000	4000	hr8_vs_unstim
chr10	112648000	112660000	3	-1.3314	4.27139	25.6553	5.37e-07	0.0139541	112652000	chr10	112664000	4000	hr8_vs_unstim
chr10	116284000	116296000	3	-1.32376	4.52381	29.378	8.5e-08	0.00456983	116288000	chr10	116300000	4000	hr8_vs_unstim
chr10	116284000	116300000	4	-1.61153	4.27926	38.2081	1.14e-09	0.000255933	116288000	chr10	116304000	4000	hr8_vs_unstim
chr10	116284000	116304000	5	-1.40597	4.19269	29.1066	9.72e-08	0.00491875	116288000	chr10	116308000	4000	hr8_vs_unstim
chr10	121260000	121272000	3	-1.17837	4.68996	23.9261	1.27e-06	0.0228216	121264000	chr10	121276000	4000	hr8_vs_unstim
chr10	121260000	121276000	4	-1.25566	4.33266	23.4772	1.59e-06	0.026015	121264000	chr10	121280000	4000	hr8_vs_unstim
chr10	124808000	125312000	126	-3.14239	7.70012	23.8836	5.8e-06	0.0492361	124812000	chr10	125316000	4000	hr8_vs_unstim
chr10	124904000	124996000	23	-2.32742	3.88907	23.0537	1.99e-06	0.0289236	124908000	chr10	125000000	4000	hr8_vs_unstim
chr10	124904000	125000000	24	-2.33639	3.90132	24.3592	1.03e-06	0.020344	124908000	chr10	125004000	4000	hr8_vs_unstim
chr10	124908000	124996000	22	-2.16814	4.0943	23.0545	1.98e-06	0.0289236	124912000	chr10	125000000	4000	hr8_vs_unstim
chr10	124912000	124992000	20	-2.38491	3.60515	23.2771	2.49e-06	0.0324113	124916000	chr10	124996000	4000	hr8_vs_unstim
chr10	124912000	124996000	21	-2.51067	4.48921	38.4808	1.02e-09	0.000239906	124916000	chr10	125000000	4000	hr8_vs_unstim
chr10	124912000	125000000	22	-2.75598	4.45144	45.9961	2.81e-11	1.61e-05	124916000	chr10	125004000	4000	hr8_vs_unstim
chr10	124912000	125004000	23	-2.43423	3.96137	26.068	4.42e-07	0.0122993	124916000	chr10	125008000	4000	hr8_vs_unstim
chr10	124916000	124992000	19	-2.57855	3.2815	22.0846	4.4e-06	0.043057	124920000	chr10	124996000	4000	hr8_vs_unstim
chr10	124916000	124996000	20	-2.71165	3.71071	32.0136	4.34e-08	0.00298245	124920000	chr10	125000000	4000	hr8_vs_unstim
chr10	124916000	125000000	21	-2.61566	3.82249	26.7626	3.13e-07	0.00995919	124920000	chr10	125004000	4000	hr8_vs_unstim
chr10	124920000	125000000	20	-2.33977	3.84824	28.3358	2.34e-07	0.00832956	124924000	chr10	125004000	4000	hr8_vs_unstim
chr10	124924000	125004000	20	-2.55748	3.32413	23.6029	2.14e-06	0.0299197	124928000	chr10	125008000	4000	hr8_vs_unstim
chr10	126476000	126488000	3	-1.52063	3.5428	22.3404	2.82e-06	0.0344549	126480000	chr10	126492000	4000	hr8_vs_unstim
chr10	129700000	129812000	28	1.8283	5.57899	23.0434	1.64e-06	0.0263601	129704000	chr10	129816000	4000	hr8_vs_unstim
chr10	129704000	129800000	24	2.10874	4.70977	24.8767	7.99e-07	0.0174732	129708000	chr10	129804000	4000	hr8_vs_unstim
chr10	129704000	129804000	25	2.37288	5.04928	33.1086	1.38e-08	0.00136813	129708000	chr10	129808000	4000	hr8_vs_unstim
chr10	129708000	129796000	22	1.91118	4.87597	23.5528	1.55e-06	0.0255986	129712000	chr10	129800000	4000	hr8_vs_unstim
chr10	129708000	129808000	25	1.62811	5.06237	21.2403	4.94e-06	0.0458657	129712000	chr10	129812000	4000	hr8_vs_unstim
chr10	129708000	129812000	26	1.79252	5.03769	21.9247	3.5e-06	0.0384043	129712000	chr10	129816000	4000	hr8_vs_unstim
chr10	129708000	129816000	27	1.76301	4.87162	21.6183	4.08e-06	0.0414578	129712000	chr10	129820000	4000	hr8_vs_unstim
chr10	129712000	129824000	28	2.92148	4.21441	22.128	2.64e-06	0.0332289	129716000	chr10	129828000	4000	hr8_vs_unstim
chr10	129760000	129780000	5	1.45265	3.80157	21.515	4.27e-06	0.0425022	129764000	chr10	129784000	4000	hr8_vs_unstim
chr10	134196000	134268000	18	-1.54915	4.80875	21.5648	5.64e-06	0.0484994	134200000	chr10	134272000	4000	hr8_vs_unstim
chr10	134200000	134264000	16	-1.57487	5.64465	31.8592	4.66e-08	0.00307727	134204000	chr10	134268000	4000	hr8_vs_unstim
chr10	134200000	134268000	17	-1.44682	5.35421	23.9739	1.79e-06	0.027588	134204000	chr10	134272000	4000	hr8_vs_unstim
chr11	236000	448000	53	-2.13281	5.59466	22.3602	2.77e-06	0.0340629	240000	chr11	452000	4000	hr8_vs_unstim
chr11	2988000	3044000	14	-2.03556	3.99319	26.6359	8.22e-07	0.0177559	2992000	chr11	3048000	4000	hr8_vs_unstim
chr11	2996000	3040000	11	-1.70795	4.71424	26.3322	9.38e-07	0.0192273	3000000	chr11	3044000	4000	hr8_vs_unstim
chr11	3000000	3012000	3	-1.75309	3.27468	23.9109	4.83e-06	0.0453443	3004000	chr11	3016000	4000	hr8_vs_unstim
chr11	3004000	3032000	7	-1.88165	4.08058	29.0815	3.82e-07	0.0111938	3008000	chr11	3036000	4000	hr8_vs_unstim
chr11	3008000	3036000	7	-2.13971	3.99531	38.4067	9.47e-09	0.00113913	3012000	chr11	3040000	4000	hr8_vs_unstim
chr11	6256000	6500000	61	-3.29452	4.98019	21.2722	3.99e-06	0.0410858	6260000	chr11	6504000	4000	hr8_vs_unstim
chr11	11048000	11176000	32	-2.03908	5.09596	27.683	6.7e-07	0.0158253	11052000	chr11	11180000	4000	hr8_vs_unstim
chr11	11048000	11228000	45	-2.81535	5.04063	22.9351	2.07e-06	0.0295552	11052000	chr11	11232000	4000	hr8_vs_unstim
chr11	11060000	11160000	25	-2.40985	3.82132	21.5433	5.21e-06	0.0469471	11064000	chr11	11164000	4000	hr8_vs_unstim
chr11	11060000	11176000	29	-1.89839	5.18143	24.066	3.09e-06	0.0361947	11064000	chr11	11180000	4000	hr8_vs_unstim
chr11	13876000	13976000	25	-2.25346	3.89278	21.5623	5.16e-06	0.0467189	13880000	chr11	13980000	4000	hr8_vs_unstim
chr11	13880000	13964000	21	-2.68038	3.48955	23.3729	2.15e-06	0.0299197	13884000	chr11	13968000	4000	hr8_vs_unstim
chr11	13880000	13984000	26	-2.61494	3.90174	27.8181	2.58e-07	0.00872638	13884000	chr11	13988000	4000	hr8_vs_unstim
chr11	13884000	13964000	20	-2.46754	3.42476	23.7976	2.64e-06	0.0332426	13888000	chr11	13968000	4000	hr8_vs_unstim
chr11	13884000	13972000	22	-4.77571	3.16152	40.089	9.02e-10	0.000221917	13888000	chr11	13976000	4000	hr8_vs_unstim
chr11	13884000	13984000	25	-2.84023	3.49833	22.8669	2.74e-06	0.0339332	13888000	chr11	13988000	4000	hr8_vs_unstim
chr11	13888000	13940000	13	-2.24848	3.46813	24.1181	2.48e-06	0.0322935	13892000	chr11	13944000	4000	hr8_vs_unstim
chr11	13888000	13948000	15	-2.68179	3.19689	23.0025	3.78e-06	0.0399264	13892000	chr11	13952000	4000	hr8_vs_unstim
chr11	13888000	13960000	18	-3.39549	3.2198	34.3796	2.66e-08	0.00219929	13892000	chr11	13964000	4000	hr8_vs_unstim
chr11	13888000	13964000	19	-2.621	3.16384	25.1344	1.45e-06	0.024641	13892000	chr11	13968000	4000	hr8_vs_unstim
chr11	13888000	13968000	20	-2.62567	3.37338	24.3447	2.07e-06	0.0295395	13892000	chr11	13972000	4000	hr8_vs_unstim
chr11	13892000	13928000	9	-1.90367	3.75963	26.3534	1.19e-06	0.0219904	13896000	chr11	13932000	4000	hr8_vs_unstim
chr11	13892000	13936000	11	-2.10075	4.28809	32.881	5.76e-08	0.00355368	13896000	chr11	13940000	4000	hr8_vs_unstim
chr11	13892000	13948000	14	-2.47392	3.75429	34.0034	3.62e-08	0.00266762	13896000	chr11	13952000	4000	hr8_vs_unstim
chr11	13892000	13964000	18	-2.41888	3.81933	28.1949	3.76e-07	0.0111141	13896000	chr11	13968000	4000	hr8_vs_unstim
chr11	13892000	13968000	19	-2.14089	4.12308	24.619	1.83e-06	0.0277155	13896000	chr11	13972000	4000	hr8_vs_unstim
chr11	13892000	13976000	21	-2.22025	4.20653	25.0512	9.61e-07	0.0195583	13896000	chr11	13980000	4000	hr8_vs_unstim
chr11	13892000	14168000	69	-2.6169	6.00763	21.6913	5.87e-06	0.049539	13896000	chr11	14172000	4000	hr8_vs_unstim
chr11	13896000	13936000	10	-2.49642	3.59743	31.7079	9.41e-08	0.00483682	13900000	chr11	13940000	4000	hr8_vs_unstim
chr11	13896000	13948000	13	-2.68695	3.44866	32.8752	5.78e-08	0.00355368	13900000	chr11	13952000	4000	hr8_vs_unstim
chr11	13896000	13964000	17	-2.52612	3.30652	22.6571	4.42e-06	0.043155	13900000	chr11	13968000	4000	hr8_vs_unstim
chr11	14556000	14568000	3	-1.53396	4.14999	29.8283	4.76e-07	0.0129078	14560000	chr11	14572000	4000	hr8_vs_unstim
chr11	14568000	14600000	8	-2.46526	3.77781	45.3121	7.17e-10	0.000190344	14572000	chr11	14604000	4000	hr8_vs_unstim
chr11	14568000	14624000	14	-2.07191	3.59466	22.2406	5.74e-06	0.0489395	14572000	chr11	14628000	4000	hr8_vs_unstim
chr11	14596000	14784000	47	-2.63532	5.11859	23.1227	1.89e-06	0.0281739	14600000	chr11	14788000	4000	hr8_vs_unstim
chr11	14616000	14640000	6	-1.96629	3.50242	26.1624	1.29e-06	0.0229058	14620000	chr11	14644000	4000	hr8_vs_unstim
chr11	14756000	14780000	6	-2.91618	3.07531	35.8225	2.57e-08	0.00214816	14760000	chr11	14784000	4000	hr8_vs_unstim
chr11	35080000	35096000	4	-1.44507	3.98636	25.9398	2.15e-06	0.0299197	35084000	chr11	35100000	4000	hr8_vs_unstim
chr11	35160000	35268000	27	-2.91917	3.70764	26.5861	4.63e-07	0.0127413	35164000	chr11	35272000	4000	hr8_vs_unstim
chr11	35164000	35176000	3	-1.32497	4.37015	28.3836	8.28e-07	0.0178235	35168000	chr11	35180000	4000	hr8_vs_unstim
chr11	35164000	35180000	4	-1.47079	4.46916	36.2183	4.52e-08	0.00305009	35168000	chr11	35184000	4000	hr8_vs_unstim
chr11	35200000	35212000	3	-1.73616	3.77969	33.5172	1.2e-07	0.00561584	35204000	chr11	35216000	4000	hr8_vs_unstim
chr11	48024000	48044000	5	-1.63789	3.37571	24.9381	3.2e-06	0.036647	48028000	chr11	48048000	4000	hr8_vs_unstim
chr11	57112000	57560000	112	3.18063	7.12862	23.3992	2.56e-06	0.0327519	57116000	chr11	57564000	4000	hr8_vs_unstim
chr11	57176000	57188000	3	1.49325	4.29291	29.1575	6.15e-07	0.0151241	57180000	chr11	57192000	4000	hr8_vs_unstim
chr11	57212000	57428000	54	5.22813	4.50662	34.176	7.93e-09	0.00101252	57216000	chr11	57432000	4000	hr8_vs_unstim
chr11	58420000	58552000	33	-1.74571	5.55845	24.808	2.25e-06	0.0306283	58424000	chr11	58556000	4000	hr8_vs_unstim
chr11	58424000	58532000	27	-3.55051	3.28356	28.8256	1.61e-07	0.00657173	58428000	chr11	58536000	4000	hr8_vs_unstim
chr11	60740000	60752000	3	-1.27063	4.44567	25.1432	2.95e-06	0.0352586	60744000	chr11	60756000	4000	hr8_vs_unstim
chr11	60756000	60768000	3	-1.36248	4.51599	31.8377	2.24e-07	0.00807691	60760000	chr11	60772000	4000	hr8_vs_unstim
chr11	60772000	60792000	5	-1.44958	3.94064	25.0275	3.08e-06	0.0361503	60776000	chr11	60796000	4000	hr8_vs_unstim
chr11	60792000	60808000	4	-1.50584	4.64147	39.1775	1.59e-08	0.0015346	60796000	chr11	60812000	4000	hr8_vs_unstim
chr11	60796000	60808000	3	-1.2413	4.48832	25.6046	2.45e-06	0.0320371	60800000	chr11	60812000	4000	hr8_vs_unstim
chr11	60812000	60828000	4	-1.41694	4.0631	27.0265	1.4e-06	0.0241189	60816000	chr11	60832000	4000	hr8_vs_unstim
chr11	60816000	60828000	3	-1.20672	4.39405	24.3309	4.08e-06	0.0414456	60820000	chr11	60832000	4000	hr8_vs_unstim
chr11	60816000	60832000	4	-1.34213	3.98016	23.4667	5.78e-06	0.0491591	60820000	chr11	60836000	4000	hr8_vs_unstim
chr11	60816000	60840000	6	-1.82143	3.83729	26.5314	1.1e-06	0.0210974	60820000	chr11	60844000	4000	hr8_vs_unstim
chr11	60820000	60836000	4	-1.61337	3.93582	32.1723	1.98e-07	0.00740053	60824000	chr11	60840000	4000	hr8_vs_unstim
chr11	61736000	61792000	14	-2.06112	3.81577	26.1186	1.03e-06	0.0202847	61740000	chr11	61796000	4000	hr8_vs_unstim
chr11	64504000	64532000	7	-1.98741	3.74168	28.4437	4.97e-07	0.0132269	64508000	chr11	64536000	4000	hr8_vs_unstim
chr11	64508000	64532000	6	-1.72681	3.95845	23.6406	3.76e-06	0.0397951	64512000	chr11	64536000	4000	hr8_vs_unstim
chr11	64508000	64544000	9	-2.1908	3.69877	35.9373	2.46e-08	0.00208	64512000	chr11	64548000	4000	hr8_vs_unstim
chr11	64508000	64608000	25	-2.45367	3.75514	21.2793	5.92e-06	0.0497293	64512000	chr11	64612000	4000	hr8_vs_unstim
chr11	64512000	64528000	4	-1.59059	4.71741	44.0016	3.06e-09	0.000555375	64516000	chr11	64532000	4000	hr8_vs_unstim
chr11	64512000	64544000	8	-1.6563	4.15088	25.2902	1.86e-06	0.0279768	64516000	chr11	64548000	4000	hr8_vs_unstim
chr11	65848000	65880000	8	-1.52052	4.3551	24.0506	3.15e-06	0.036424	65852000	chr11	65884000	4000	hr8_vs_unstim
chr11	66176000	66580000	101	5.09338	6.0577	21.8273	5.14e-06	0.0466754	66180000	chr11	66584000	4000	hr8_vs_unstim
chr11	66956000	67308000	88	-5.37494	5.03064	22.3024	2.33e-06	0.0311852	66960000	chr11	67312000	4000	hr8_vs_unstim
chr11	67032000	67056000	6	-1.56154	4.62989	26.2489	1.24e-06	0.0225825	67036000	chr11	67060000	4000	hr8_vs_unstim
chr11	67036000	67048000	3	-1.22577	4.77434	26.2062	1.93e-06	0.0285419	67040000	chr11	67052000	4000	hr8_vs_unstim
chr11	68872000	69004000	33	2.36494	4.63014	22.7146	5.54e-06	0.0482194	68876000	chr11	69008000	4000	hr8_vs_unstim
chr11	73692000	73704000	3	-1.48148	4.30628	29.5659	5.26e-07	0.0137622	73696000	chr11	73708000	4000	hr8_vs_unstim
chr11	77896000	77908000	3	-1.33602	4.48797	29.1278	6.22e-07	0.0151719	77900000	chr11	77912000	4000	hr8_vs_unstim
chr11	77896000	77912000	4	-1.3443	4.07568	25.1613	2.92e-06	0.035135	77900000	chr11	77916000	4000	hr8_vs_unstim
chr11	86168000	86316000	37	2.71872	4.93904	22.4682	2.27e-06	0.0307409	86172000	chr11	86320000	4000	hr8_vs_unstim
chr11	102212000	102236000	6	-2.06985	3.8043	32.7748	8.56e-08	0.00458182	102216000	chr11	102240000	4000	hr8_vs_unstim
chr11	107636000	107764000	32	3.32842	4.17257	26.6626	1.03e-06	0.0202533	107640000	chr11	107768000	4000	hr8_vs_unstim
chr11	107652000	107776000	31	3.7347	4.15035	33.0234	7.58e-08	0.00429997	107656000	chr11	107780000	4000	hr8_vs_unstim
chr11	107660000	107756000	24	2.96778	3.82073	24.1702	1.47e-06	0.0246861	107664000	chr11	107760000	4000	hr8_vs_unstim
chr11	108080000	108124000	11	-2.36365	3.42308	27.8675	4.82e-07	0.0129961	108084000	chr11	108128000	4000	hr8_vs_unstim
chr11	108088000	108120000	8	-1.61899	3.88884	23.9622	3.27e-06	0.0371733	108092000	chr11	108124000	4000	hr8_vs_unstim
chr11	108092000	108108000	4	-1.32349	4.26708	25.7861	2.28e-06	0.0307798	108096000	chr11	108112000	4000	hr8_vs_unstim
chr11	117824000	117844000	5	-1.44456	4.31555	28.2611	8.68e-07	0.0183901	117828000	chr11	117848000	4000	hr8_vs_unstim
chr11	118736000	118760000	6	-2.12276	3.40938	27.3866	7.7e-07	0.0172772	118740000	chr11	118764000	4000	hr8_vs_unstim
chr11	118740000	118764000	6	-1.53917	4.46826	25.4634	1.73e-06	0.0270613	118744000	chr11	118768000	4000	hr8_vs_unstim
chr11	118744000	118764000	5	-1.78142	3.97519	38.1639	2.27e-08	0.00196325	118748000	chr11	118768000	4000	hr8_vs_unstim
chr11	118744000	118796000	13	-2.37887	3.72024	27.76	5.05e-07	0.0133254	118748000	chr11	118800000	4000	hr8_vs_unstim
chr11	118748000	118760000	3	-1.44366	4.73253	38.9474	1.72e-08	0.00162089	118752000	chr11	118764000	4000	hr8_vs_unstim
chr11	118776000	118796000	5	-1.13203	5.00599	23.9584	4.74e-06	0.0450518	118780000	chr11	118800000	4000	hr8_vs_unstim
chr11	121336000	121348000	3	-1.32246	4.29507	25.9157	2.17e-06	0.0299962	121340000	chr11	121352000	4000	hr8_vs_unstim
chr11	125808000	126112000	76	-4.89465	5.00785	23.5109	2.51e-06	0.0325325	125812000	chr11	126116000	4000	hr8_vs_unstim
chr11	125936000	126080000	36	-3.08389	4.23848	20.7063	5.63e-06	0.0484787	125940000	chr11	126084000	4000	hr8_vs_unstim
chr11	128160000	128172000	3	-1.46936	4.17816	28.8011	7.05e-07	0.0163052	128164000	chr11	128176000	4000	hr8_vs_unstim
chr11	128176000	128192000	4	-1.5626	4.14759	33.3625	1.27e-07	0.00574367	128180000	chr11	128196000	4000	hr8_vs_unstim
chr11	128176000	128196000	5	-1.46663	3.81574	23.923	4.8e-06	0.0452979	128180000	chr11	128200000	4000	hr8_vs_unstim
chr11	128564000	128596000	8	-1.93886	4.07663	32.5626	9.31e-08	0.00481352	128568000	chr11	128600000	4000	hr8_vs_unstim
chr11	128568000	128584000	4	-1.23898	4.40591	24.6559	3.58e-06	0.0388406	128572000	chr11	128588000	4000	hr8_vs_unstim
chr11	129644000	129748000	26	-2.9595	3.66492	29.0875	1.42e-07	0.00611056	129648000	chr11	129752000	4000	hr8_vs_unstim
chr11	129644000	129752000	27	-2.92336	3.34141	21.7206	4.78e-06	0.0452355	129648000	chr11	129756000	4000	hr8_vs_unstim
chr11	129644000	129792000	37	-5.43261	3.99877	38.2533	7.32e-10	0.000192436	129648000	chr11	129796000	4000	hr8_vs_unstim
chr11	129652000	129752000	25	-2.63524	3.7431	24.9533	1.01e-06	0.0200785	129656000	chr11	129756000	4000	hr8_vs_unstim
chr11	129656000	129732000	19	-2.42889	3.52464	22.0822	5.74e-06	0.0489395	129660000	chr11	129736000	4000	hr8_vs_unstim
chr11	129656000	129740000	21	-2.54968	3.95725	25.7414	6.92e-07	0.0161191	129660000	chr11	129744000	4000	hr8_vs_unstim
chr11	129656000	129764000	27	-3.69898	3.67629	43.5566	1.91e-10	6.92e-05	129660000	chr11	129768000	4000	hr8_vs_unstim
chr11	129660000	129720000	15	-2.16223	3.79173	22.0413	5.85e-06	0.0494652	129664000	chr11	129724000	4000	hr8_vs_unstim
chr11	129660000	129736000	19	-2.41808	3.56099	24.2447	2.16e-06	0.0299319	129664000	chr11	129740000	4000	hr8_vs_unstim
chr11	129660000	129760000	25	-2.52271	3.79949	23.7318	1.81e-06	0.0276236	129664000	chr11	129764000	4000	hr8_vs_unstim
chr11	129680000	129712000	8	-2.19281	3.25111	27.5996	7.04e-07	0.0163045	129684000	chr11	129716000	4000	hr8_vs_unstim
chr11	129680000	129716000	9	-2.29789	2.94999	22.6643	5.73e-06	0.0489027	129684000	chr11	129720000	4000	hr8_vs_unstim
chr11	129680000	129724000	11	-2.27134	3.3311	23.6955	2.99e-06	0.0354786	129684000	chr11	129728000	4000	hr8_vs_unstim
chr11	129680000	129732000	13	-2.77545	3.14212	27.5546	5.52e-07	0.0141706	129684000	chr11	129736000	4000	hr8_vs_unstim
chr11	129684000	129712000	7	-2.35451	3.20469	29.6778	2.99e-07	0.00966402	129688000	chr11	129716000	4000	hr8_vs_unstim
chr11	129684000	129736000	13	-2.98215	2.9739	25.5727	1.31e-06	0.0230938	129688000	chr11	129740000	4000	hr8_vs_unstim
chr12	816000	832000	4	-1.4959	3.71041	24.7888	3.61e-06	0.0389811	820000	chr12	836000	4000	hr8_vs_unstim
chr12	3992000	4056000	16	-1.97622	3.8496	20.9432	5.19e-06	0.0468954	3996000	chr12	4060000	4000	hr8_vs_unstim
chr12	4004000	4056000	13	-1.66629	4.225	23.0149	1.9e-06	0.0283515	4008000	chr12	4060000	4000	hr8_vs_unstim
chr12	4044000	4056000	3	-1.53348	3.92859	28.6637	8.04e-07	0.0174928	4048000	chr12	4060000	4000	hr8_vs_unstim
chr12	9804000	9824000	5	-1.37239	4.14847	27.781	1.13e-06	0.0213275	9808000	chr12	9828000	4000	hr8_vs_unstim
chr12	9804000	9840000	9	-1.87278	3.73536	29.9551	1.43e-07	0.00612966	9808000	chr12	9844000	4000	hr8_vs_unstim
chr12	9808000	9840000	8	-1.81179	3.71917	26.2931	7.38e-07	0.0168436	9812000	chr12	9844000	4000	hr8_vs_unstim
chr12	9808000	9844000	9	-2.16281	3.19058	27.8368	3.68e-07	0.010924	9812000	chr12	9848000	4000	hr8_vs_unstim
chr12	9808000	9852000	11	-2.17018	3.62385	26.4797	3.32e-07	0.0102482	9812000	chr12	9856000	4000	hr8_vs_unstim
chr12	9808000	9856000	12	-2.4114	3.00147	23.5471	1.45e-06	0.024647	9812000	chr12	9860000	4000	hr8_vs_unstim
chr12	9812000	9828000	4	-1.32419	3.9962	23.9834	4.97e-06	0.0459625	9816000	chr12	9832000	4000	hr8_vs_unstim
chr12	9812000	9844000	8	-1.80149	3.40829	22.2858	4.64e-06	0.0444094	9816000	chr12	9848000	4000	hr8_vs_unstim
chr12	9812000	9852000	10	-1.70962	3.8763	21.0159	5.25e-06	0.047111	9816000	chr12	9856000	4000	hr8_vs_unstim
chr12	9816000	9828000	3	-1.47034	4.00075	30.0787	4.72e-07	0.0128805	9820000	chr12	9832000	4000	hr8_vs_unstim
chr12	9816000	9840000	6	-1.91924	3.7805	31.7539	6.47e-08	0.00379732	9820000	chr12	9844000	4000	hr8_vs_unstim
chr12	9816000	9852000	9	-2.20846	3.79352	42.6045	6.31e-10	0.000174416	9820000	chr12	9856000	4000	hr8_vs_unstim
chr12	9824000	9856000	8	-1.78349	3.75008	26.6991	6.14e-07	0.0151232	9828000	chr12	9860000	4000	hr8_vs_unstim
chr12	9828000	9844000	4	-1.33351	4.22897	27.0818	1.47e-06	0.0247849	9832000	chr12	9848000	4000	hr8_vs_unstim
chr12	9828000	9848000	5	-1.35339	4.08121	25.7792	2.45e-06	0.0319998	9832000	chr12	9852000	4000	hr8_vs_unstim
chr12	9828000	9852000	6	-1.39316	4.45807	22.9845	3.36e-06	0.0376765	9832000	chr12	9856000	4000	hr8_vs_unstim
chr12	9840000	9856000	4	-1.44734	3.7414	24.819	3.57e-06	0.0387976	9844000	chr12	9860000	4000	hr8_vs_unstim
chr12	11652000	11696000	11	-2.63207	3.31813	29.925	5.93e-08	0.00360613	11656000	chr12	11700000	4000	hr8_vs_unstim
chr12	12528000	12632000	26	-2.08572	4.33214	24.5386	8.83e-07	0.0185859	12532000	chr12	12636000	4000	hr8_vs_unstim
chr12	12532000	12688000	39	-3.05322	4.05229	20.7001	5.37e-06	0.0476047	12536000	chr12	12692000	4000	hr8_vs_unstim
chr12	12592000	12616000	6	-1.84428	3.5675	23.5819	2.55e-06	0.0327519	12596000	chr12	12620000	4000	hr8_vs_unstim
chr12	12620000	12632000	3	-1.75965	4.56509	52.4303	2.44e-10	8.39e-05	12624000	chr12	12636000	4000	hr8_vs_unstim
chr12	12644000	12664000	5	-1.37529	3.90657	24.1777	4.6e-06	0.0442722	12648000	chr12	12668000	4000	hr8_vs_unstim
chr12	12960000	13252000	73	-4.38255	4.72984	23.5781	4.81e-06	0.0453443	12964000	chr12	13256000	4000	hr8_vs_unstim
chr12	14520000	14532000	3	-1.54725	4.24341	36.0954	5.29e-08	0.00339274	14524000	chr12	14536000	4000	hr8_vs_unstim
chr12	15100000	15112000	3	-1.16659	4.76765	27.4561	1.28e-06	0.0228446	15104000	chr12	15116000	4000	hr8_vs_unstim
chr12	21764000	21828000	16	-1.82004	4.77859	30.0322	5.12e-08	0.00330651	21768000	chr12	21832000	4000	hr8_vs_unstim
chr12	25004000	25108000	26	3.14091	3.37177	21.4094	4.3e-06	0.0426556	25008000	chr12	25112000	4000	hr8_vs_unstim
chr12	51700000	51732000	8	-1.90223	4.2184	34.7851	1.73e-08	0.00162089	51704000	chr12	51736000	4000	hr8_vs_unstim
chr12	51700000	51736000	9	-2.31834	3.83915	42.8113	5.79e-10	0.000162761	51704000	chr12	51740000	4000	hr8_vs_unstim
chr12	51704000	51732000	7	-1.66684	4.12175	28.5445	2.68e-07	0.00898844	51708000	chr12	51736000	4000	hr8_vs_unstim
chr12	51708000	51732000	6	-1.56478	4.56217	29.7362	1.58e-07	0.00653551	51712000	chr12	51736000	4000	hr8_vs_unstim
chr12	52976000	53000000	6	-1.52369	4.25717	23.8627	2.24e-06	0.0305433	52980000	chr12	53004000	4000	hr8_vs_unstim
chr12	52976000	53004000	7	-1.50303	4.17147	23.5807	2.55e-06	0.0327519	52980000	chr12	53008000	4000	hr8_vs_unstim
chr12	52976000	53040000	16	-1.73784	4.28427	20.9317	5.22e-06	0.0469782	52980000	chr12	53044000	4000	hr8_vs_unstim
chr12	52980000	52992000	3	-1.13563	4.69897	24.9772	3.35e-06	0.0376765	52984000	chr12	52996000	4000	hr8_vs_unstim
chr12	52980000	52996000	4	-1.79633	4.15047	44.8937	2.66e-09	0.000506121	52984000	chr12	53000000	4000	hr8_vs_unstim
chr12	52980000	53000000	5	-1.69023	4.25267	43.5801	4.1e-09	0.000691213	52984000	chr12	53004000	4000	hr8_vs_unstim
chr12	52980000	53004000	6	-1.62665	4.53798	32.0434	5.7e-08	0.00355368	52984000	chr12	53008000	4000	hr8_vs_unstim
chr12	52980000	53036000	14	-1.84788	4.29184	29.4081	7.68e-08	0.00431716	52984000	chr12	53040000	4000	hr8_vs_unstim
chr12	52984000	53000000	4	-1.53298	4.30523	37.3637	3.39e-08	0.00256581	52988000	chr12	53004000	4000	hr8_vs_unstim
chr12	52988000	53000000	3	-1.63417	3.88289	34.3433	9.87e-08	0.0049579	52992000	chr12	53004000	4000	hr8_vs_unstim
chr12	53000000	53036000	9	-1.9223	4.11099	35.4033	1.32e-08	0.0013317	53004000	chr12	53040000	4000	hr8_vs_unstim
chr12	53004000	53032000	7	-1.7823	3.77704	26.8373	5.77e-07	0.0145659	53008000	chr12	53036000	4000	hr8_vs_unstim
chr12	53004000	53036000	8	-2.36813	4.34828	59.5832	7.21e-13	1.14e-06	53008000	chr12	53040000	4000	hr8_vs_unstim
chr12	53004000	53040000	9	-2.29299	3.93662	47.9077	7.18e-11	3.38e-05	53008000	chr12	53044000	4000	hr8_vs_unstim
chr12	53004000	53084000	20	-2.22308	3.79107	26.0831	3.77e-07	0.0111185	53008000	chr12	53088000	4000	hr8_vs_unstim
chr12	53008000	53024000	4	-1.86699	3.94164	41.6185	7.88e-09	0.00101252	53012000	chr12	53028000	4000	hr8_vs_unstim
chr12	53008000	53028000	5	-2.00311	3.00606	29.1236	6.75e-07	0.01588	53012000	chr12	53032000	4000	hr8_vs_unstim
chr12	53008000	53032000	6	-2.01903	3.93125	33.4464	3.09e-08	0.00241461	53012000	chr12	53036000	4000	hr8_vs_unstim
chr12	53008000	53036000	7	-2.07874	4.23669	42.3812	6.92e-10	0.000187505	53012000	chr12	53040000	4000	hr8_vs_unstim
chr12	53012000	53024000	3	-1.58055	4.50124	41.9503	7.05e-09	0.000954981	53016000	chr12	53028000	4000	hr8_vs_unstim
chr12	53012000	53036000	6	-1.6342	4.49114	29.9948	1.41e-07	0.00610265	53016000	chr12	53040000	4000	hr8_vs_unstim
chr12	53016000	53032000	4	-1.55621	3.75223	28.6975	7.94e-07	0.0174393	53020000	chr12	53036000	4000	hr8_vs_unstim
chr12	53016000	53036000	5	-1.47633	3.86212	27.4087	1.3e-06	0.0230298	53020000	chr12	53040000	4000	hr8_vs_unstim
chr12	53020000	53036000	4	-1.38038	4.5002	32.7236	1.77e-07	0.00694706	53024000	chr12	53040000	4000	hr8_vs_unstim
chr12	53024000	53036000	3	-1.31354	4.65048	31.5184	2.76e-07	0.00918394	53028000	chr12	53040000	4000	hr8_vs_unstim
chr12	53040000	53076000	9	-1.56186	4.01445	22.3598	4.48e-06	0.0435332	53044000	chr12	53080000	4000	hr8_vs_unstim
chr12	53044000	53072000	7	-1.5391	4.53813	27.1331	5.05e-07	0.0133254	53048000	chr12	53076000	4000	hr8_vs_unstim
chr12	53048000	53068000	5	-1.40033	3.8585	25.4601	2.77e-06	0.0340886	53052000	chr12	53072000	4000	hr8_vs_unstim
chr12	53124000	53252000	32	-2.8166	3.59525	22.4963	2.51e-06	0.0324931	53128000	chr12	53256000	4000	hr8_vs_unstim
chr12	53936000	54072000	34	-1.81241	5.0506	22.1011	3.06e-06	0.0359761	53940000	chr12	54076000	4000	hr8_vs_unstim
chr12	55256000	55472000	54	-6.69671	3.92094	27.4945	2.58e-07	0.00872638	55260000	chr12	55476000	4000	hr8_vs_unstim
chr12	55360000	55376000	4	-1.70919	3.40467	27.0667	1.48e-06	0.0248674	55364000	chr12	55380000	4000	hr8_vs_unstim
chr12	57644000	57832000	47	3.8981	4.52069	22.3835	3.12e-06	0.0363139	57648000	chr12	57836000	4000	hr8_vs_unstim
chr12	65060000	65080000	5	-1.53371	3.90103	30.3193	4.31e-07	0.0121203	65064000	chr12	65084000	4000	hr8_vs_unstim
chr12	65060000	65088000	7	-1.99272	3.51919	27.7885	3.76e-07	0.0111141	65064000	chr12	65092000	4000	hr8_vs_unstim
chr12	65068000	65080000	3	-1.45502	4.19294	31.6908	2.59e-07	0.00873076	65072000	chr12	65084000	4000	hr8_vs_unstim
chr12	66524000	66560000	9	-2.17743	3.45001	31.1181	8.56e-08	0.00458182	66528000	chr12	66564000	4000	hr8_vs_unstim
chr12	69724000	69748000	6	-2.28603	3.7479	40.1041	1.79e-09	0.0003727	69728000	chr12	69752000	4000	hr8_vs_unstim
chr12	76192000	76428000	59	3.39109	5.31463	30.4625	9.71e-08	0.00491875	76196000	chr12	76432000	4000	hr8_vs_unstim
chr12	76192000	76432000	60	4.34549	5.09003	36.0936	7.9e-09	0.00101252	76196000	chr12	76436000	4000	hr8_vs_unstim
chr12	76196000	76432000	59	3.57403	4.90681	23.5593	2.32e-06	0.031125	76200000	chr12	76436000	4000	hr8_vs_unstim
chr12	76200000	76424000	56	3.35379	5.07995	24.7477	1.33e-06	0.0233156	76204000	chr12	76428000	4000	hr8_vs_unstim
chr12	76200000	76428000	57	3.19143	5.07167	21.6796	5.62e-06	0.0484779	76204000	chr12	76432000	4000	hr8_vs_unstim
chr12	76204000	76412000	52	3.29321	4.90155	27.3272	2.79e-07	0.00922436	76208000	chr12	76416000	4000	hr8_vs_unstim
chr12	76204000	76424000	55	4.06331	5.67507	46.3077	9.81e-11	4.46e-05	76208000	chr12	76428000	4000	hr8_vs_unstim
chr12	76204000	76428000	56	2.19579	5.87873	22.0935	4.62e-06	0.0443531	76208000	chr12	76432000	4000	hr8_vs_unstim
chr12	76204000	76432000	57	3.41304	5.6341	35.6407	9.64e-09	0.00113913	76208000	chr12	76436000	4000	hr8_vs_unstim
chr12	76204000	76436000	58	3.49456	5.08049	24.8064	1.3e-06	0.0230298	76208000	chr12	76440000	4000	hr8_vs_unstim
chr12	76204000	76444000	60	3.42881	4.87255	23.7887	2.08e-06	0.0296151	76208000	chr12	76448000	4000	hr8_vs_unstim
chr12	76208000	76396000	47	3.52192	4.49803	25.3357	7.34e-07	0.0168133	76212000	chr12	76400000	4000	hr8_vs_unstim
chr12	76208000	76416000	52	2.87887	5.07115	23.6059	1.71e-06	0.0269155	76212000	chr12	76420000	4000	hr8_vs_unstim
chr12	76208000	76420000	53	3.38307	5.08697	33.7414	1.3e-08	0.00131907	76212000	chr12	76424000	4000	hr8_vs_unstim
chr12	76208000	76424000	54	3.06817	5.48151	33.7449	1.3e-08	0.00131907	76212000	chr12	76428000	4000	hr8_vs_unstim
chr12	76208000	76428000	55	3.40705	6.30282	57.465	1e-12	1.35e-06	76212000	chr12	76432000	4000	hr8_vs_unstim
chr12	76208000	76432000	56	2.74624	5.70068	24.4127	1.56e-06	0.0256722	76212000	chr12	76436000	4000	hr8_vs_unstim
chr12	76212000	76332000	30	4.48008	3.53432	28.4945	1.23e-07	0.00570156	76216000	chr12	76336000	4000	hr8_vs_unstim
chr12	76212000	76428000	54	3.68386	5.02717	33.4943	1.46e-08	0.00142493	76216000	chr12	76432000	4000	hr8_vs_unstim
chr12	76212000	76432000	55	3.6328	5.24286	24.8841	1.25e-06	0.0226656	76216000	chr12	76436000	4000	hr8_vs_unstim
chr12	76216000	76320000	26	2.66321	3.78812	23.6013	1.42e-06	0.0242801	76220000	chr12	76324000	4000	hr8_vs_unstim
chr12	76216000	76328000	28	2.95031	4.22485	27.6738	1.86e-07	0.00715495	76220000	chr12	76332000	4000	hr8_vs_unstim
chr12	76216000	76364000	37	3.54884	4.15064	25.6177	4.16e-07	0.0118594	76220000	chr12	76368000	4000	hr8_vs_unstim
chr12	76216000	76412000	49	3.0275	4.77525	23.8705	1.5e-06	0.0250844	76220000	chr12	76416000	4000	hr8_vs_unstim
chr12	76216000	76420000	51	2.63968	5.12159	21.8442	4.07e-06	0.0413909	76220000	chr12	76424000	4000	hr8_vs_unstim
chr12	76216000	76424000	52	3.6844	5.61485	54.6115	8.86e-13	1.32e-06	76220000	chr12	76428000	4000	hr8_vs_unstim
chr12	76216000	76428000	53	2.98058	5.42123	34.3428	9.77e-09	0.00114921	76220000	chr12	76432000	4000	hr8_vs_unstim
chr12	76228000	76424000	49	3.20318	5.18402	30.607	5.77e-08	0.00355368	76232000	chr12	76428000	4000	hr8_vs_unstim
chr12	76244000	76304000	15	2.80317	3.18684	23.8679	1.16e-06	0.0216937	76248000	chr12	76308000	4000	hr8_vs_unstim
chr12	76248000	76424000	44	3.67871	4.28348	28.3187	1.03e-07	0.00510957	76252000	chr12	76428000	4000	hr8_vs_unstim
chr12	76252000	76424000	43	3.56569	4.33937	25.8578	3.68e-07	0.010924	76256000	chr12	76428000	4000	hr8_vs_unstim
chr12	76260000	76408000	37	3.18967	4.05334	21.3511	3.83e-06	0.0401653	76264000	chr12	76412000	4000	hr8_vs_unstim
chr12	76260000	76428000	42	2.94926	4.37038	22.2818	2.36e-06	0.031357	76264000	chr12	76432000	4000	hr8_vs_unstim
chr12	76272000	76424000	38	3.51404	4.80797	35.3777	2.72e-09	0.000509995	76276000	chr12	76428000	4000	hr8_vs_unstim
chr12	76280000	76424000	36	2.60343	4.59867	21.7454	3.11e-06	0.0363112	76284000	chr12	76428000	4000	hr8_vs_unstim
chr12	76296000	76416000	30	2.74944	4.03409	21.9237	3.35e-06	0.0376757	76300000	chr12	76420000	4000	hr8_vs_unstim
chr12	76300000	76420000	30	3.21039	4.09298	28.6558	1.14e-07	0.00547437	76304000	chr12	76424000	4000	hr8_vs_unstim
chr12	76304000	76424000	30	3.59344	4.17076	29.8147	6.4e-08	0.00379138	76308000	chr12	76428000	4000	hr8_vs_unstim
chr12	76308000	76424000	29	2.55279	4.33537	20.8592	5.75e-06	0.0489753	76312000	chr12	76428000	4000	hr8_vs_unstim
chr12	76316000	76424000	27	2.71318	4.11133	29.0774	9.07e-08	0.0047413	76320000	chr12	76428000	4000	hr8_vs_unstim
chr12	76320000	76412000	23	2.56753	4.15019	29.0179	9.34e-08	0.00481352	76324000	chr12	76416000	4000	hr8_vs_unstim
chr12	76320000	76420000	25	3.75668	3.91962	39.8818	4.39e-10	0.000130917	76324000	chr12	76424000	4000	hr8_vs_unstim
chr12	76324000	76416000	23	2.49532	4.02512	25.4421	5.6e-07	0.0142678	76328000	chr12	76420000	4000	hr8_vs_unstim
chr12	76324000	76420000	24	3.09	4.04629	33.8968	8.3e-09	0.00104547	76328000	chr12	76424000	4000	hr8_vs_unstim
chr12	76324000	76424000	25	2.76409	4.42975	30.9447	3.58e-08	0.0026615	76328000	chr12	76428000	4000	hr8_vs_unstim
chr12	76328000	76368000	10	1.77819	4.22864	23.9562	1.18e-06	0.0219659	76332000	chr12	76372000	4000	hr8_vs_unstim
chr12	76328000	76372000	11	2.55494	3.75317	29.5917	7.01e-08	0.00404761	76332000	chr12	76376000	4000	hr8_vs_unstim
chr12	76328000	76412000	21	2.79191	4.45387	36.1061	2.79e-09	0.000519848	76332000	chr12	76416000	4000	hr8_vs_unstim
chr12	76328000	76416000	22	2.94229	4.40822	38.4722	8.75e-10	0.000217383	76332000	chr12	76420000	4000	hr8_vs_unstim
chr12	76328000	76420000	23	3.31666	4.46705	47.4519	1.11e-11	7.95e-06	76332000	chr12	76424000	4000	hr8_vs_unstim
chr12	76328000	76424000	24	3.04478	4.79964	50.2119	2.95e-12	2.82e-06	76332000	chr12	76428000	4000	hr8_vs_unstim
chr12	76328000	76428000	25	2.86954	4.21935	35.566	3.65e-09	0.000630898	76332000	chr12	76432000	4000	hr8_vs_unstim
chr12	76332000	76412000	20	3.28104	3.42103	31.2438	2.78e-08	0.00224962	76336000	chr12	76416000	4000	hr8_vs_unstim
chr12	76332000	76416000	21	2.75643	3.99393	27.776	1.74e-07	0.00688463	76336000	chr12	76420000	4000	hr8_vs_unstim
chr12	76332000	76420000	22	3.92598	4.0442	41.0975	2.43e-10	8.39e-05	76336000	chr12	76424000	4000	hr8_vs_unstim
chr12	76332000	76424000	23	2.57379	4.13813	25.0307	6.89e-07	0.0160695	76336000	chr12	76428000	4000	hr8_vs_unstim
chr12	76336000	76420000	21	3.20529	3.59774	24.3196	9.86e-07	0.0198959	76340000	chr12	76424000	4000	hr8_vs_unstim
chr12	76340000	76424000	21	2.55568	4.11879	27.6277	1.87e-07	0.0071859	76344000	chr12	76428000	4000	hr8_vs_unstim
chr12	76344000	76424000	20	2.81927	3.8068	27.0089	2.36e-07	0.00835124	76348000	chr12	76428000	4000	hr8_vs_unstim
chr12	76364000	76420000	14	1.99529	3.75134	21.0923	5.05e-06	0.0463092	76368000	chr12	76424000	4000	hr8_vs_unstim
chr12	76364000	76424000	15	2.29968	4.17893	27.5927	1.75e-07	0.00691079	76368000	chr12	76428000	4000	hr8_vs_unstim
chr12	76368000	76424000	14	1.72352	4.27248	21.8454	3.44e-06	0.0380732	76372000	chr12	76428000	4000	hr8_vs_unstim
chr12	76376000	76416000	10	2.16551	4.00149	27.9883	1.56e-07	0.00647626	76380000	chr12	76420000	4000	hr8_vs_unstim
chr12	76376000	76420000	11	1.86133	4.05728	22.3719	2.64e-06	0.0332289	76380000	chr12	76424000	4000	hr8_vs_unstim
chr12	92204000	92268000	16	-1.79788	4.31205	23.7851	1.21e-06	0.0223156	92208000	chr12	92272000	4000	hr8_vs_unstim
chr12	92432000	92448000	4	-1.3292	4.00376	23.8518	5.24e-06	0.0470808	92436000	chr12	92452000	4000	hr8_vs_unstim
chr12	92756000	92788000	8	-1.71825	3.78355	26.0166	8.37e-07	0.0178914	92760000	chr12	92792000	4000	hr8_vs_unstim
chr12	92760000	92784000	6	-1.85775	3.43452	21.9009	5.55e-06	0.0482354	92764000	chr12	92788000	4000	hr8_vs_unstim
chr12	92768000	92792000	6	-1.56932	3.92274	22.6302	3.95e-06	0.0409138	92772000	chr12	92796000	4000	hr8_vs_unstim
chr12	103788000	103892000	26	-2.48555	3.85292	23.7501	1.31e-06	0.0231439	103792000	chr12	103896000	4000	hr8_vs_unstim
chr12	103792000	103892000	25	-2.22439	4.03555	22.3687	2.64e-06	0.0332558	103796000	chr12	103896000	4000	hr8_vs_unstim
chr12	106620000	106744000	31	-3.12774	3.96054	32.9337	1.37e-08	0.00135834	106624000	chr12	106748000	4000	hr8_vs_unstim
chr12	111156000	111264000	27	2.2932	4.60148	29.8672	6.12e-08	0.00366478	111160000	chr12	111268000	4000	hr8_vs_unstim
chr12	111172000	111256000	21	2.53959	3.64584	20.9216	5.51e-06	0.0481174	111176000	chr12	111260000	4000	hr8_vs_unstim
chr12	120564000	120608000	11	1.68193	4.48165	21.4654	4.18e-06	0.0419929	120568000	chr12	120612000	4000	hr8_vs_unstim
chr12	120572000	120616000	11	2.1139	4.00882	26.3064	3.62e-07	0.0108036	120576000	chr12	120620000	4000	hr8_vs_unstim
chr12	121420000	121532000	28	3.39144	4.15776	30.9218	3.7e-08	0.0026876	121424000	chr12	121536000	4000	hr8_vs_unstim
chr12	121440000	121528000	22	2.60378	3.94068	23.0038	1.92e-06	0.0284678	121444000	chr12	121532000	4000	hr8_vs_unstim
chr12	121772000	121892000	30	2.07121	4.67009	22.3577	2.69e-06	0.0335485	121776000	chr12	121896000	4000	hr8_vs_unstim
chr12	121776000	121892000	29	2.41539	4.45771	22.9669	1.98e-06	0.0288742	121780000	chr12	121896000	4000	hr8_vs_unstim
chr12	121780000	121884000	26	2.1409	4.15464	20.9172	5.53e-06	0.048202	121784000	chr12	121888000	4000	hr8_vs_unstim
chr12	122216000	122252000	9	-1.70123	3.96524	25.9269	8.72e-07	0.0184439	122220000	chr12	122256000	4000	hr8_vs_unstim
chr12	123104000	123240000	34	2.89763	4.03019	23.3347	1.64e-06	0.0263601	123108000	chr12	123244000	4000	hr8_vs_unstim
chr12	123120000	123236000	29	1.84056	5.08026	22.0637	3.12e-06	0.0363281	123124000	chr12	123240000	4000	hr8_vs_unstim
chr12	123124000	123232000	27	1.7894	5.00957	23.5206	1.48e-06	0.0247881	123128000	chr12	123236000	4000	hr8_vs_unstim
chr12	123276000	123436000	40	-1.76846	5.54146	21.3234	3.88e-06	0.0405595	123280000	chr12	123440000	4000	hr8_vs_unstim
chr12	133404000	133480000	19	-1.91323	4.10303	24.1836	9.9e-07	0.0199244	133408000	chr12	133484000	4000	hr8_vs_unstim
chr12	133412000	133480000	17	-2.20079	3.82265	23.2131	1.62e-06	0.0262662	133416000	chr12	133484000	4000	hr8_vs_unstim
chr12	133440000	133480000	10	-2.29433	3.71166	29.4327	7.58e-08	0.00429997	133444000	chr12	133484000	4000	hr8_vs_unstim
chr13	24824000	24840000	4	-1.24976	4.9199	26.8281	1.33e-06	0.0233156	24828000	chr13	24844000	4000	hr8_vs_unstim
chr13	24824000	24848000	6	-1.54337	4.88505	27.6634	3.88e-07	0.0113191	24828000	chr13	24852000	4000	hr8_vs_unstim
chr13	24824000	24860000	9	-2.26355	4.40282	37.8324	4.47e-09	0.000722913	24828000	chr13	24864000	4000	hr8_vs_unstim
chr13	24828000	24840000	3	-1.25594	5.08599	26.7715	1.36e-06	0.0236189	24832000	chr13	24844000	4000	hr8_vs_unstim
chr13	27280000	27448000	42	-2.87167	5.35341	20.9376	5.91e-06	0.0497125	27284000	chr13	27452000	4000	hr8_vs_unstim
chr13	27824000	27868000	11	-2.53979	4.09124	32.9999	9.22e-09	0.00112987	27828000	chr13	27872000	4000	hr8_vs_unstim
chr13	30032000	30276000	61	3.47445	5.92767	21.2402	4.06e-06	0.0413532	30036000	chr13	30280000	4000	hr8_vs_unstim
chr13	30044000	30284000	60	2.6106	6.69563	26.8607	2.19e-07	0.00796156	30048000	chr13	30288000	4000	hr8_vs_unstim
chr13	41088000	41100000	3	-1.48538	4.74519	35.3143	5.13e-08	0.00330651	41092000	chr13	41104000	4000	hr8_vs_unstim
chr13	41092000	41236000	36	2.4019	5.9681	24.9552	7.98e-07	0.0174727	41096000	chr13	41240000	4000	hr8_vs_unstim
chr13	41212000	41232000	5	-1.33374	4.48607	23.4335	5.28e-06	0.0472097	41216000	chr13	41236000	4000	hr8_vs_unstim
chr13	41576000	41592000	4	-1.24513	4.69751	23.9676	4.24e-06	0.0423416	41580000	chr13	41596000	4000	hr8_vs_unstim
chr13	41580000	41592000	3	-1.39525	4.59368	26.523	1.5e-06	0.0250971	41584000	chr13	41596000	4000	hr8_vs_unstim
chr13	42032000	42064000	8	-1.49721	5.00219	25.6124	9.83e-07	0.0198674	42036000	chr13	42068000	4000	hr8_vs_unstim
chr13	42044000	42056000	3	-1.47831	4.44794	25.6769	2.11e-06	0.0297629	42048000	chr13	42060000	4000	hr8_vs_unstim
chr13	42992000	43048000	14	2.53751	3.81832	23.7074	1.12e-06	0.0213167	42996000	chr13	43052000	4000	hr8_vs_unstim
chr13	46736000	46896000	40	-2.72765	5.18592	21.3958	4.7e-06	0.0448511	46740000	chr13	46900000	4000	hr8_vs_unstim
chr13	46744000	46756000	3	-1.44835	4.86685	33.5131	1e-07	0.00501812	46748000	chr13	46760000	4000	hr8_vs_unstim
chr13	46744000	46784000	10	-2.27596	4.17807	27.7096	1.41e-07	0.00610265	46748000	chr13	46788000	4000	hr8_vs_unstim
chr13	46872000	46892000	5	-1.55043	4.53679	32.5875	1.42e-07	0.00611056	46876000	chr13	46896000	4000	hr8_vs_unstim
chr13	48704000	48816000	28	-1.99479	5.73281	25.8995	3.62e-07	0.0108036	48708000	chr13	48820000	4000	hr8_vs_unstim
chr13	49568000	49792000	56	3.86248	5.78566	25.2241	5.11e-07	0.0134099	49572000	chr13	49796000	4000	hr8_vs_unstim
chr13	50700000	50792000	23	2.6778	4.80043	24.1974	1.06e-06	0.0207209	50704000	chr13	50796000	4000	hr8_vs_unstim
chr13	50700000	50800000	25	2.51121	4.79624	23.4273	1.57e-06	0.0257047	50704000	chr13	50804000	4000	hr8_vs_unstim
chr13	50700000	50812000	28	2.84533	5.02745	21.7317	3.15e-06	0.0364266	50704000	chr13	50816000	4000	hr8_vs_unstim
chr13	50700000	50820000	30	2.75307	5.05171	21.4792	3.6e-06	0.0389108	50704000	chr13	50824000	4000	hr8_vs_unstim
chr13	50700000	50840000	35	2.96344	4.75036	21.0891	4.41e-06	0.0430856	50704000	chr13	50844000	4000	hr8_vs_unstim
chr13	50704000	50800000	24	2.50111	4.695	25.5276	5.44e-07	0.0140653	50708000	chr13	50804000	4000	hr8_vs_unstim
chr13	50704000	50804000	25	3.42284	4.50753	35.3954	4.07e-09	0.000691213	50708000	chr13	50808000	4000	hr8_vs_unstim
chr13	50708000	50752000	11	2.34164	3.7297	21.6411	3.29e-06	0.0372635	50712000	chr13	50756000	4000	hr8_vs_unstim
chr13	52468000	52696000	57	-2.50122	6.54534	22.9151	1.7e-06	0.0267634	52472000	chr13	52700000	4000	hr8_vs_unstim
chr13	74328000	74632000	76	-3.47115	6.28669	20.9107	4.82e-06	0.0453443	74332000	chr13	74636000	4000	hr8_vs_unstim
chr13	74332000	74708000	94	-3.05961	7.36999	20.539	5.86e-06	0.0495187	74336000	chr13	74712000	4000	hr8_vs_unstim
chr13	74344000	74364000	5	-1.48362	4.20088	24.1118	4e-06	0.0410935	74348000	chr13	74368000	4000	hr8_vs_unstim
chr13	77900000	78268000	92	-3.8473	6.72401	21.3062	3.93e-06	0.0408458	77904000	chr13	78272000	4000	hr8_vs_unstim
chr13	95064000	95196000	33	2.76552	4.76214	21.3177	3.91e-06	0.0407238	95068000	chr13	95200000	4000	hr8_vs_unstim
chr13	99852000	99864000	3	-1.2374	5.06219	28.1026	8.03e-07	0.0174892	99856000	chr13	99868000	4000	hr8_vs_unstim
chr13	99872000	99908000	9	-1.31238	5.04535	22.1623	4.83e-06	0.0453443	99876000	chr13	99912000	4000	hr8_vs_unstim
chr13	99876000	99896000	5	-1.66487	3.77473	24.2476	3.78e-06	0.0399264	99880000	chr13	99900000	4000	hr8_vs_unstim
chr13	99936000	99948000	3	-1.60013	4.95773	41.4236	5.68e-09	0.000851697	99940000	chr13	99952000	4000	hr8_vs_unstim
chr13	99960000	99984000	6	-1.71485	4.31331	24.132	1.94e-06	0.0285419	99964000	chr13	99988000	4000	hr8_vs_unstim
chr13	100004000	100020000	4	-1.14372	5.01746	23.7171	4.7e-06	0.0448511	100008000	chr13	100024000	4000	hr8_vs_unstim
chr13	100012000	100024000	3	-1.31837	4.97589	31.3145	2.31e-07	0.00827284	100016000	chr13	100028000	4000	hr8_vs_unstim
chr13	100064000	100080000	4	-1.27175	4.70262	23.283	5.62e-06	0.0484779	100068000	chr13	100084000	4000	hr8_vs_unstim
chr13	103236000	103296000	15	-2.60848	4.26449	31.1267	8.7e-08	0.00465171	103240000	chr13	103300000	4000	hr8_vs_unstim
chr13	103244000	103272000	7	-2.0378	4.01038	28.7468	2.38e-07	0.00837184	103248000	chr13	103276000	4000	hr8_vs_unstim
chr13	103252000	103264000	3	-1.35312	4.58153	24.0109	4.16e-06	0.0419585	103256000	chr13	103268000	4000	hr8_vs_unstim
chr13	111840000	111852000	3	-1.5441	4.12886	24.6391	3.22e-06	0.0367661	111844000	chr13	111856000	4000	hr8_vs_unstim
chr13	111932000	112052000	30	-3.45827	4.09428	21.4573	3.64e-06	0.0390622	111936000	chr13	112056000	4000	hr8_vs_unstim
chr13	114856000	114996000	35	-2.34369	5.17289	24.7041	6.73e-07	0.0158542	114860000	chr13	115000000	4000	hr8_vs_unstim
chr13	114892000	114988000	24	-1.6301	5.48491	21.8414	3.49e-06	0.0383866	114896000	chr13	114992000	4000	hr8_vs_unstim
chr13	114896000	114908000	3	-1.26161	4.93803	26.7207	1.39e-06	0.0239944	114900000	chr13	114912000	4000	hr8_vs_unstim
chr13	114896000	114992000	24	-1.77743	5.24895	22.3856	2.65e-06	0.0332701	114900000	chr13	114996000	4000	hr8_vs_unstim
chr13	114912000	114992000	20	-2.17758	4.30328	23.3726	2.84e-06	0.0345872	114916000	chr13	114996000	4000	hr8_vs_unstim
chr13	114932000	114984000	13	-1.8404	4.55946	24.2896	8.29e-07	0.0178388	114936000	chr13	114988000	4000	hr8_vs_unstim
chr13	114940000	114984000	11	-1.68905	4.58109	21.5206	3.5e-06	0.0384043	114944000	chr13	114988000	4000	hr8_vs_unstim
chr13	114948000	114980000	8	-1.75208	4.17196	23.2236	2.95e-06	0.0352586	114952000	chr13	114984000	4000	hr8_vs_unstim
chr13	114956000	114968000	3	-1.20415	5.1804	27.7175	9.35e-07	0.019223	114960000	chr13	114972000	4000	hr8_vs_unstim
chr13	114956000	114972000	4	-1.52891	4.36014	28.2031	7.72e-07	0.0172957	114960000	chr13	114976000	4000	hr8_vs_unstim
chr14	21164000	21324000	40	-2.23463	5.73837	24.1043	3.66e-06	0.0392028	21168000	chr14	21328000	4000	hr8_vs_unstim
chr14	21224000	21324000	25	-3.41987	3.77025	24.7344	7.79e-07	0.0173067	21228000	chr14	21328000	4000	hr8_vs_unstim
chr14	22996000	23008000	3	-1.38868	4.95038	32.1131	5.54e-07	0.0142094	23000000	chr14	23012000	4000	hr8_vs_unstim
chr14	22996000	23016000	5	-1.49536	4.33546	25.2744	5.63e-06	0.0484903	23000000	chr14	23020000	4000	hr8_vs_unstim
chr14	25072000	25152000	20	2.29957	4.44858	23.7793	3.41e-06	0.0379702	25076000	chr14	25156000	4000	hr8_vs_unstim
chr14	35512000	35588000	19	-2.28744	4.42792	23.5031	3.85e-06	0.040308	35516000	chr14	35592000	4000	hr8_vs_unstim
chr14	61788000	61800000	3	-1.94332	4.7255	55.85	6.38e-10	0.000174533	61792000	chr14	61804000	4000	hr8_vs_unstim
chr14	62116000	62128000	3	-1.43619	4.57923	25.4908	5.22e-06	0.0469471	62120000	chr14	62132000	4000	hr8_vs_unstim
chr14	65452000	65564000	28	-2.91095	4.59295	25.6699	7.91e-07	0.0174045	65456000	chr14	65568000	4000	hr8_vs_unstim
chr14	71084000	71284000	50	-2.78654	5.37938	21.157	4.24e-06	0.0423416	71088000	chr14	71288000	4000	hr8_vs_unstim
chr14	71872000	72184000	78	3.67767	6.35766	21.5047	3.61e-06	0.038962	71876000	chr14	72188000	4000	hr8_vs_unstim
chr14	75692000	75764000	18	-1.75	4.93705	22.8426	5.12e-06	0.0466115	75696000	chr14	75768000	4000	hr8_vs_unstim
chr14	75696000	75760000	16	-1.70273	5.06909	24.2983	2.73e-06	0.0338469	75700000	chr14	75764000	4000	hr8_vs_unstim
chr14	75768000	76116000	87	3.12041	6.90934	26.4588	2.78e-07	0.00921269	75772000	chr14	76120000	4000	hr8_vs_unstim
chr14	75780000	76104000	81	3.37064	6.62125	21.6833	3.29e-06	0.0372525	75784000	chr14	76108000	4000	hr8_vs_unstim
chr14	75784000	76120000	84	3.15765	6.81473	21.8564	3e-06	0.0355226	75788000	chr14	76124000	4000	hr8_vs_unstim
chr14	75788000	76096000	77	3.53932	5.98871	22.4147	3.44e-06	0.0380732	75792000	chr14	76100000	4000	hr8_vs_unstim
chr14	75928000	76112000	46	4.03427	4.94797	24.3413	8.08e-07	0.017546	75932000	chr14	76116000	4000	hr8_vs_unstim
chr14	81684000	81996000	78	-3.27342	6.27077	21.3175	3.97e-06	0.0409975	81688000	chr14	82000000	4000	hr8_vs_unstim
chr14	88460000	88472000	3	-1.36652	4.70302	25.725	4.8e-06	0.0452979	88464000	chr14	88476000	4000	hr8_vs_unstim
chr14	94396000	94468000	18	1.41986	5.92487	23.2369	4.32e-06	0.042719	94400000	chr14	94472000	4000	hr8_vs_unstim
chr14	94396000	94484000	22	2.50902	4.73419	26.342	3.46e-07	0.0104495	94400000	chr14	94488000	4000	hr8_vs_unstim
chr14	98068000	98188000	30	-2.54607	5.07911	29.3873	1.4e-07	0.00610265	98072000	chr14	98192000	4000	hr8_vs_unstim
chr14	98084000	98180000	24	-2.43852	4.30173	21.9955	3.13e-06	0.0363474	98088000	chr14	98184000	4000	hr8_vs_unstim
chr14	98444000	98564000	30	2.26638	5.64938	29.4451	1.37e-07	0.00602359	98448000	chr14	98568000	4000	hr8_vs_unstim
chr14	98636000	98652000	4	-1.69984	4.38491	32.0401	5.67e-07	0.0143579	98640000	chr14	98656000	4000	hr8_vs_unstim
chr14	98636000	98656000	5	-1.4484	4.46905	26.0563	4.27e-06	0.0425022	98640000	chr14	98660000	4000	hr8_vs_unstim
chr14	98640000	98652000	3	-2.11469	4.69818	59.228	2.76e-10	9.25e-05	98644000	chr14	98656000	4000	hr8_vs_unstim
chr14	98640000	98672000	8	-1.83094	4.3597	26.9457	1.12e-06	0.0213167	98644000	chr14	98676000	4000	hr8_vs_unstim
chr14	99712000	99724000	3	-1.30259	5.11146	31.1977	7.47e-07	0.0169464	99716000	chr14	99728000	4000	hr8_vs_unstim
chr14	100548000	100560000	3	-1.19592	5.10888	25.2338	5.71e-06	0.0488634	100552000	chr14	100564000	4000	hr8_vs_unstim
chr14	100548000	100568000	5	-1.36566	4.98094	30.0262	1.1e-06	0.0210974	100552000	chr14	100572000	4000	hr8_vs_unstim
chr14	101012000	101108000	24	-2.33187	4.83415	28.1213	1.41e-07	0.00610605	101016000	chr14	101112000	4000	hr8_vs_unstim
chr14	102268000	102300000	8	-1.70913	4.60174	25.1459	2.35e-06	0.0312706	102272000	chr14	102304000	4000	hr8_vs_unstim
chr14	105516000	105548000	8	-1.64913	4.54191	24.7824	2.73e-06	0.0338469	105520000	chr14	105552000	4000	hr8_vs_unstim
chr14	105516000	105552000	9	-1.5992	4.71972	24.8252	2.68e-06	0.033462	105520000	chr14	105556000	4000	hr8_vs_unstim
chr14	105912000	105956000	11	-1.66267	4.72215	23.048	2.79e-06	0.034264	105916000	chr14	105960000	4000	hr8_vs_unstim
chr14	106656000	106716000	15	-2.18867	4.92981	26.8878	9.07e-07	0.0188699	106660000	chr14	106720000	4000	hr8_vs_unstim
chr14	106664000	106692000	7	-1.94091	4.08382	22.915	5.95e-06	0.0498838	106668000	chr14	106696000	4000	hr8_vs_unstim
chr15	22468000	22480000	3	-1.35379	5.27145	32.8505	7.86e-08	0.00439477	22472000	chr15	22484000	4000	hr8_vs_unstim
chr15	26092000	26104000	3	-1.2042	5.46923	28.645	4.38e-07	0.0122535	26096000	chr15	26108000	4000	hr8_vs_unstim
chr15	29108000	29392000	71	-3.34328	6.13055	25.3344	8.13e-07	0.017627	29112000	chr15	29396000	4000	hr8_vs_unstim
chr15	29240000	29264000	6	-1.61328	4.57589	22.6348	3.76e-06	0.0397978	29244000	chr15	29268000	4000	hr8_vs_unstim
chr15	31492000	31556000	16	-2.068	4.78616	23.3776	1.89e-06	0.0281799	31496000	chr15	31560000	4000	hr8_vs_unstim
chr15	31492000	31780000	72	-1.46725	8.24175	24.2692	1.36e-06	0.0235756	31496000	chr15	31784000	4000	hr8_vs_unstim
chr15	31496000	31656000	40	-2.16357	5.85565	23.5401	2.75e-06	0.0339532	31500000	chr15	31660000	4000	hr8_vs_unstim
chr15	31504000	31556000	13	-1.78653	4.74817	22.5907	4.87e-06	0.0456264	31508000	chr15	31560000	4000	hr8_vs_unstim
chr15	31508000	31556000	12	-1.74035	5.2302	28.6105	3.47e-07	0.0104716	31512000	chr15	31560000	4000	hr8_vs_unstim
chr15	31628000	31648000	5	-1.24693	4.96449	22.7283	5.41e-06	0.0476892	31632000	chr15	31652000	4000	hr8_vs_unstim
chr15	34612000	34624000	3	-1.47612	4.77029	30.7921	1.81e-07	0.0070098	34616000	chr15	34628000	4000	hr8_vs_unstim
chr15	38840000	38852000	3	-1.3988	4.48168	24.3137	2.72e-06	0.033826	38844000	chr15	38856000	4000	hr8_vs_unstim
chr15	38944000	38960000	4	-1.42013	5.1275	34.1819	4.62e-08	0.00306601	38948000	chr15	38964000	4000	hr8_vs_unstim
chr15	38948000	38960000	3	-1.76912	5.15844	50.0807	1.16e-10	5e-05	38952000	chr15	38964000	4000	hr8_vs_unstim
chr15	42060000	42200000	35	-2.32031	5.18824	23.3032	2.55e-06	0.0327519	42064000	chr15	42204000	4000	hr8_vs_unstim
chr15	42064000	42224000	40	-3.20577	5.16088	30.3024	1.34e-07	0.00596015	42068000	chr15	42228000	4000	hr8_vs_unstim
chr15	42280000	42412000	33	3.17454	4.6534	24.0993	1.76e-06	0.0273315	42284000	chr15	42416000	4000	hr8_vs_unstim
chr15	42840000	42936000	24	-3.47876	4.16592	26.0284	8.94e-07	0.0187075	42844000	chr15	42940000	4000	hr8_vs_unstim
chr15	42864000	42936000	18	-2.45354	4.16884	22.9449	2.34e-06	0.0312039	42868000	chr15	42940000	4000	hr8_vs_unstim
chr15	44956000	44972000	4	-1.13148	5.48789	24.4884	2.53e-06	0.0326037	44960000	chr15	44976000	4000	hr8_vs_unstim
chr15	45004000	45016000	3	-1.23556	5.23448	27.3356	7.55e-07	0.0171009	45008000	chr15	45020000	4000	hr8_vs_unstim
chr15	52956000	53020000	16	-2.41801	4.27757	24.1355	1.3e-06	0.0230298	52960000	chr15	53024000	4000	hr8_vs_unstim
chr15	60036000	60232000	49	-3.04274	5.4031	21.5484	5.89e-06	0.0495939	60040000	chr15	60236000	4000	hr8_vs_unstim
chr15	60044000	60092000	12	-2.00878	4.36094	23.858	2.77e-06	0.0340629	60048000	chr15	60096000	4000	hr8_vs_unstim
chr15	60044000	60284000	60	-2.46584	6.31557	23.1943	5.78e-06	0.0491502	60048000	chr15	60288000	4000	hr8_vs_unstim
chr15	60048000	60120000	18	-2.31538	4.29414	22.0206	3.69e-06	0.0393558	60052000	chr15	60124000	4000	hr8_vs_unstim
chr15	60056000	60116000	15	-2.45071	4.34724	24.5282	1.07e-06	0.0208564	60060000	chr15	60120000	4000	hr8_vs_unstim
chr15	63756000	63788000	8	-1.51659	4.88328	23.7595	2.23e-06	0.0305403	63760000	chr15	63792000	4000	hr8_vs_unstim
chr15	63776000	63788000	3	-1.7047	5.21083	49.8381	1.27e-10	5.31e-05	63780000	chr15	63792000	4000	hr8_vs_unstim
chr15	63776000	63792000	4	-1.44664	5.0476	32.8006	8.02e-08	0.00443533	63780000	chr15	63796000	4000	hr8_vs_unstim
chr15	63776000	63796000	5	-1.38945	4.76399	26.1021	1.27e-06	0.0228063	63780000	chr15	63800000	4000	hr8_vs_unstim
chr15	66088000	66144000	14	-2.22447	4.15303	22.7904	4.45e-06	0.0433819	66092000	chr15	66148000	4000	hr8_vs_unstim
chr15	68596000	68676000	20	1.87065	5.40654	21.3245	5.2e-06	0.046927	68600000	chr15	68680000	4000	hr8_vs_unstim
chr15	68604000	68664000	15	2.27837	4.806	21.7314	4.25e-06	0.042371	68608000	chr15	68668000	4000	hr8_vs_unstim
chr15	68848000	68944000	24	2.67339	4.61207	22.9029	3.69e-06	0.0393591	68852000	chr15	68948000	4000	hr8_vs_unstim
chr15	70020000	70048000	7	-1.72664	4.51505	23.9964	1.99e-06	0.0289801	70024000	chr15	70052000	4000	hr8_vs_unstim
chr15	74244000	74256000	3	-1.26789	4.98811	23.8696	3.3e-06	0.0373256	74248000	chr15	74260000	4000	hr8_vs_unstim
chr15	74696000	74720000	6	1.40194	5.66137	23.0879	3.04e-06	0.0358204	74700000	chr15	74724000	4000	hr8_vs_unstim
chr15	85260000	85284000	6	-1.80265	4.85776	30.8272	8.94e-08	0.00469653	85264000	chr15	85288000	4000	hr8_vs_unstim
chr15	86228000	86248000	5	-1.33116	4.78749	23.2105	4.39e-06	0.0430208	86232000	chr15	86252000	4000	hr8_vs_unstim
chr15	89164000	89208000	11	-1.98891	5.07861	36.5232	1.27e-08	0.00131616	89168000	chr15	89212000	4000	hr8_vs_unstim
chr15	89168000	89180000	3	-1.28317	5.60121	34.5847	3.94e-08	0.00279725	89172000	chr15	89184000	4000	hr8_vs_unstim
chr15	90772000	90808000	9	-1.66679	4.57198	24.2082	1.81e-06	0.0276236	90776000	chr15	90812000	4000	hr8_vs_unstim
chr15	92592000	92604000	3	1.37589	4.83928	23.9771	3.15e-06	0.0364176	92596000	chr15	92608000	4000	hr8_vs_unstim
chr15	93364000	93388000	6	-1.59281	4.64294	22.4876	4.03e-06	0.0412012	93368000	chr15	93392000	4000	hr8_vs_unstim
chr15	93428000	93440000	3	-1.40297	5.15685	32.7133	8.31e-08	0.00449903	93432000	chr15	93444000	4000	hr8_vs_unstim
chr15	93496000	93508000	3	-1.50358	4.69064	27.4927	7.07e-07	0.0163426	93500000	chr15	93512000	4000	hr8_vs_unstim
chr15	100468000	100872000	101	-1.88326	8.21946	22.7943	5.66e-06	0.0486319	100472000	chr15	100876000	4000	hr8_vs_unstim
chr15	100468000	100876000	102	-2.15336	8.42156	31.9937	1.27e-07	0.00574367	100472000	chr15	100880000	4000	hr8_vs_unstim
chr15	100472000	100876000	101	-1.78996	8.55525	23.739	3.78e-06	0.0399264	100476000	chr15	100880000	4000	hr8_vs_unstim
chr15	100476000	100920000	111	-4.64929	7.01965	21.2925	3.96e-06	0.0409138	100480000	chr15	100924000	4000	hr8_vs_unstim
chr15	100884000	101112000	57	-2.21877	6.72737	24.8289	2.95e-06	0.0352586	100888000	chr15	101116000	4000	hr8_vs_unstim
chr15	101564000	101816000	63	4.63444	5.81694	31.3279	2.26e-07	0.00811525	101568000	chr15	101820000	4000	hr8_vs_unstim
chr15	101608000	101816000	52	3.47957	5.51246	24.2575	1.64e-06	0.0263601	101612000	chr15	101820000	4000	hr8_vs_unstim
chr15	101652000	101792000	35	2.27043	5.67685	23.7513	2.07e-06	0.0295552	101656000	chr15	101796000	4000	hr8_vs_unstim
chr15	101660000	101688000	7	1.92763	4.41284	24.1196	1.88e-06	0.0281681	101664000	chr15	101692000	4000	hr8_vs_unstim
chr15	101660000	101732000	18	2.67008	4.60805	26.945	3.31e-07	0.010227	101664000	chr15	101736000	4000	hr8_vs_unstim
chr15	101728000	101788000	15	1.96262	4.92738	21.7489	4.22e-06	0.0422095	101732000	chr15	101792000	4000	hr8_vs_unstim
chr16	372000	400000	7	-1.83851	4.8172	30.3332	1.84e-07	0.00709014	376000	chr16	404000	4000	hr8_vs_unstim
chr16	420000	448000	7	-1.52421	5.12995	22.6208	5.11e-06	0.0465439	424000	chr16	452000	4000	hr8_vs_unstim
chr16	3608000	3684000	19	-2.30602	4.25406	20.5076	5.94e-06	0.0498496	3612000	chr16	3688000	4000	hr8_vs_unstim
chr16	4520000	4552000	8	-1.85792	4.25731	23.2366	3.89e-06	0.0405612	4524000	chr16	4556000	4000	hr8_vs_unstim
chr16	4524000	4552000	7	-1.60371	4.95449	26.9279	7.79e-07	0.0173067	4528000	chr16	4556000	4000	hr8_vs_unstim
chr16	4536000	4552000	4	-1.54855	4.57874	27.4544	2.27e-06	0.0307409	4540000	chr16	4556000	4000	hr8_vs_unstim
chr16	4672000	4724000	13	-2.03177	4.57571	25.7613	5.94e-07	0.0148071	4676000	chr16	4728000	4000	hr8_vs_unstim
chr16	11128000	11348000	55	2.65572	6.16934	21.0264	4.54e-06	0.0438467	11132000	chr16	11352000	4000	hr8_vs_unstim
chr16	11176000	11344000	42	2.3506	5.73328	21.838	3.17e-06	0.0365102	11180000	chr16	11348000	4000	hr8_vs_unstim
chr16	11196000	11344000	37	2.16874	5.99775	21.3683	4.04e-06	0.0413109	11200000	chr16	11348000	4000	hr8_vs_unstim
chr16	11624000	11652000	7	-1.58873	4.74871	23.5177	3.44e-06	0.0380732	11628000	chr16	11656000	4000	hr8_vs_unstim
chr16	11676000	11712000	9	-1.46911	5.36414	22.5914	5.18e-06	0.0468056	11680000	chr16	11716000	4000	hr8_vs_unstim
chr16	15528000	15716000	47	3.32731	5.547	23.5501	2.82e-06	0.0344549	15532000	chr16	15720000	4000	hr8_vs_unstim
chr16	15576000	15692000	29	2.99726	4.6163	23.5561	2.11e-06	0.0297629	15580000	chr16	15696000	4000	hr8_vs_unstim
chr16	15576000	15732000	39	3.73075	4.68098	23.1096	1.65e-06	0.0264148	15580000	chr16	15736000	4000	hr8_vs_unstim
chr16	15584000	15700000	29	3.00258	4.78034	23.3538	2.32e-06	0.031125	15588000	chr16	15704000	4000	hr8_vs_unstim
chr16	15588000	15732000	36	4.51061	4.66402	27.3137	1.92e-07	0.0072891	15592000	chr16	15736000	4000	hr8_vs_unstim
chr16	15736000	15768000	8	-2.18058	4.06659	28.0495	4.83e-07	0.0129961	15740000	chr16	15772000	4000	hr8_vs_unstim
chr16	22012000	22304000	73	-2.17217	7.37277	28.6055	1.8e-07	0.00699997	22016000	chr16	22308000	4000	hr8_vs_unstim
chr16	22012000	22308000	74	-1.92265	7.45389	25.2999	8.59e-07	0.018229	22016000	chr16	22312000	4000	hr8_vs_unstim
chr16	22016000	22308000	73	-2.43291	7.1161	31.126	5.52e-08	0.00349352	22020000	chr16	22312000	4000	hr8_vs_unstim
chr16	22360000	22388000	7	-1.65055	4.62314	24.4558	2.28e-06	0.0307409	22364000	chr16	22392000	4000	hr8_vs_unstim
chr16	27256000	27268000	3	-1.37454	4.93249	26.9674	2.7e-06	0.0336107	27260000	chr16	27272000	4000	hr8_vs_unstim
chr16	27256000	27272000	4	-1.7017	4.42138	28.7195	1.46e-06	0.024647	27260000	chr16	27276000	4000	hr8_vs_unstim
chr16	27256000	27276000	5	-1.44872	4.56028	26.0176	3.79e-06	0.039966	27260000	chr16	27280000	4000	hr8_vs_unstim
chr16	28152000	28320000	42	-2.3995	5.26645	20.8161	5.38e-06	0.0476084	28156000	chr16	28324000	4000	hr8_vs_unstim
chr16	31704000	31880000	44	-2.69177	5.05589	21.4372	3.9e-06	0.0406617	31708000	chr16	31884000	4000	hr8_vs_unstim
chr16	49468000	49624000	39	-2.82013	5.29772	26.8013	2.49e-07	0.00858905	49472000	chr16	49628000	4000	hr8_vs_unstim
chr16	49472000	49520000	12	-2.27784	4.07641	25.7435	6e-07	0.0148588	49476000	chr16	49524000	4000	hr8_vs_unstim
chr16	49472000	49524000	13	-2.23475	4.57458	30.599	5.76e-08	0.00355368	49476000	chr16	49528000	4000	hr8_vs_unstim
chr16	49472000	49624000	38	-2.39651	5.54126	25.2938	5.38e-07	0.0139543	49476000	chr16	49628000	4000	hr8_vs_unstim
chr16	49476000	49496000	5	-1.53794	4.61662	28.1863	1.76e-06	0.0273315	49480000	chr16	49500000	4000	hr8_vs_unstim
chr16	50420000	50680000	65	-2.44038	6.33132	21.7586	3.1e-06	0.0362365	50424000	chr16	50684000	4000	hr8_vs_unstim
chr16	53468000	53484000	4	-1.33915	5.26836	27.3225	2.38e-06	0.0314655	53472000	chr16	53488000	4000	hr8_vs_unstim
chr16	53472000	53484000	3	-1.5719	4.90707	34.7442	1.95e-07	0.00735975	53476000	chr16	53488000	4000	hr8_vs_unstim
chr16	57024000	57040000	4	-1.57085	4.91929	30.5368	7.83e-07	0.0173193	57028000	chr16	57044000	4000	hr8_vs_unstim
chr16	68296000	68316000	5	-1.59727	4.86932	35.1053	1.73e-07	0.00687595	68300000	chr16	68320000	4000	hr8_vs_unstim
chr16	69428000	69644000	54	2.74356	5.73286	22.0259	5.66e-06	0.0486319	69432000	chr16	69648000	4000	hr8_vs_unstim
chr16	69452000	69740000	72	3.59002	6.01354	22.6002	3.14e-06	0.0363767	69456000	chr16	69744000	4000	hr8_vs_unstim
chr16	69572000	69592000	5	1.43266	4.68773	25.0749	5.32e-06	0.0473698	69576000	chr16	69596000	4000	hr8_vs_unstim
chr16	81480000	81500000	5	-1.66843	4.84064	36.5103	1.11e-07	0.00536011	81484000	chr16	81504000	4000	hr8_vs_unstim
chr16	84656000	84764000	27	-2.08822	5.02366	23.4562	2.09e-06	0.0296282	84660000	chr16	84768000	4000	hr8_vs_unstim
chr16	85340000	85588000	62	-3.09305	5.68941	21.1436	4.27e-06	0.0424849	85344000	chr16	85592000	4000	hr8_vs_unstim
chr16	85832000	86052000	55	2.3648	6.78879	20.6355	5.56e-06	0.0482571	85836000	chr16	86056000	4000	hr8_vs_unstim
chr16	85832000	86064000	58	2.76727	6.62216	26.5231	2.61e-07	0.00878203	85836000	chr16	86068000	4000	hr8_vs_unstim
chr16	85836000	86052000	54	2.4395	6.46267	25.8828	9.88e-07	0.0199003	85840000	chr16	86056000	4000	hr8_vs_unstim
chr16	85836000	86056000	55	2.19821	6.96305	23.9388	9.96e-07	0.0199811	85840000	chr16	86060000	4000	hr8_vs_unstim
chr16	85844000	86064000	55	2.30165	6.84463	23.3814	1.33e-06	0.0233156	85848000	chr16	86068000	4000	hr8_vs_unstim
chr16	85848000	86064000	54	2.40646	6.63278	24.9082	1.53e-06	0.0253941	85852000	chr16	86068000	4000	hr8_vs_unstim
chr16	85852000	85920000	17	2.56624	4.9225	32.6124	1.13e-08	0.00124824	85856000	chr16	85924000	4000	hr8_vs_unstim
chr16	85852000	85924000	18	3.3396	5.34304	63.1304	1.94e-15	1.04e-08	85856000	chr16	85928000	4000	hr8_vs_unstim
chr16	85852000	85928000	19	2.84375	5.19442	45.6459	1.42e-11	9.52e-06	85856000	chr16	85932000	4000	hr8_vs_unstim
chr16	85852000	85936000	21	2.20931	5.49182	28.7622	1.68e-07	0.00674564	85856000	chr16	85940000	4000	hr8_vs_unstim
chr16	85856000	85892000	9	1.67839	4.90924	23.444	3.55e-06	0.0386604	85860000	chr16	85896000	4000	hr8_vs_unstim
chr16	85856000	85900000	11	2.18976	4.83452	28.6053	1.5e-07	0.00629782	85860000	chr16	85904000	4000	hr8_vs_unstim
chr16	85856000	85920000	16	2.44965	5.21165	33.7767	6.19e-09	0.000891453	85860000	chr16	85924000	4000	hr8_vs_unstim
chr16	85856000	85924000	17	2.17799	5.73602	36.281	1.71e-09	0.000359409	85860000	chr16	85928000	4000	hr8_vs_unstim
chr16	85856000	85928000	18	1.8849	5.33967	23.3616	1.34e-06	0.0234664	85860000	chr16	85932000	4000	hr8_vs_unstim
chr16	85856000	85936000	20	2.13867	5.30573	28.2636	1.06e-07	0.00519122	85860000	chr16	85940000	4000	hr8_vs_unstim
chr16	85860000	85888000	7	1.84311	4.7864	27.2506	6.79e-07	0.0159288	85864000	chr16	85892000	4000	hr8_vs_unstim
chr16	85860000	85892000	8	1.7702	4.98303	27.063	7.36e-07	0.0168343	85864000	chr16	85896000	4000	hr8_vs_unstim
chr16	85860000	85920000	15	1.97387	5.10531	22.4139	2.2e-06	0.0303282	85864000	chr16	85924000	4000	hr8_vs_unstim
chr16	85860000	85924000	16	2.28445	5.40602	33.2621	8.06e-09	0.00102014	85864000	chr16	85928000	4000	hr8_vs_unstim
chr16	85864000	85924000	15	2.05756	4.99132	22.0046	2.72e-06	0.0338113	85868000	chr16	85928000	4000	hr8_vs_unstim
chr16	85924000	86048000	31	2.25582	5.49495	22.3935	3.67e-06	0.0392419	85928000	chr16	86052000	4000	hr8_vs_unstim
chr16	85928000	86048000	30	3.36624	5.40921	36.7862	4.69e-09	0.000736185	85932000	chr16	86052000	4000	hr8_vs_unstim
chr16	85928000	86052000	31	3.38929	5.05575	28.9593	1.67e-07	0.00671871	85932000	chr16	86056000	4000	hr8_vs_unstim
chr16	85932000	86048000	29	2.77446	5.10895	22.4727	3.54e-06	0.0385963	85936000	chr16	86052000	4000	hr8_vs_unstim
chr16	85936000	86020000	21	2.01554	5.68534	28.4203	1.97e-07	0.00740025	85940000	chr16	86024000	4000	hr8_vs_unstim
chr16	85936000	86024000	22	2.19266	5.17776	24.7233	1.14e-06	0.0214083	85940000	chr16	86028000	4000	hr8_vs_unstim
chr16	85952000	86020000	17	2.08724	5.26246	27.7189	1.4e-07	0.00610265	85956000	chr16	86024000	4000	hr8_vs_unstim
chr16	85952000	86048000	24	2.68155	5.01551	28.6376	1.78e-07	0.00696449	85956000	chr16	86052000	4000	hr8_vs_unstim
chr16	85956000	86016000	15	2.23496	4.76145	22.8819	1.72e-06	0.027054	85960000	chr16	86020000	4000	hr8_vs_unstim
chr16	85980000	86024000	11	1.89396	4.94716	21.9823	3.79e-06	0.039966	85984000	chr16	86028000	4000	hr8_vs_unstim
chr16	85984000	86016000	8	2.07301	4.74698	32.7806	6.66e-08	0.0038828	85988000	chr16	86020000	4000	hr8_vs_unstim
chr16	87804000	88500000	174	3.6935	10.8341	23.3071	4.92e-06	0.0457855	87808000	chr16	88504000	4000	hr8_vs_unstim
chr16	87812000	87972000	40	2.82389	5.10046	22.9538	1.79e-06	0.0275163	87816000	chr16	87976000	4000	hr8_vs_unstim
chr16	89160000	89180000	5	-1.63735	5.21033	41.3797	2.47e-08	0.00208232	89164000	chr16	89184000	4000	hr8_vs_unstim
chr16	89160000	89184000	6	-2.06397	4.979	41.5316	2.01e-09	0.000402604	89164000	chr16	89188000	4000	hr8_vs_unstim
chr16	89552000	89624000	18	-2.15438	4.33811	20.801	5.1e-06	0.0465034	89556000	chr16	89628000	4000	hr8_vs_unstim
chr16	89572000	89624000	13	-2.29461	4.2649	27.6012	2.44e-07	0.00845162	89576000	chr16	89628000	4000	hr8_vs_unstim
chr16	89576000	89624000	12	-2.09809	4.30049	24.2815	1.22e-06	0.0224198	89580000	chr16	89628000	4000	hr8_vs_unstim
chr16	89600000	89624000	6	-1.81812	4.41372	23.9362	2.86e-06	0.0346545	89604000	chr16	89628000	4000	hr8_vs_unstim
chr17	1620000	1684000	16	-2.20068	4.45354	24.3359	1.11e-06	0.0211426	1624000	chr17	1688000	4000	hr8_vs_unstim
chr17	2684000	2732000	12	-2.22016	4.08804	26.3633	9.72e-07	0.0197006	2688000	chr17	2736000	4000	hr8_vs_unstim
chr17	8800000	8836000	9	-1.88447	4.13753	24.3516	2.33e-06	0.031125	8804000	chr17	8840000	4000	hr8_vs_unstim
chr17	8804000	8832000	7	-1.73008	4.41707	22.8995	4.42e-06	0.0431514	8808000	chr17	8836000	4000	hr8_vs_unstim
chr17	8808000	8836000	7	-1.72036	4.4259	23.7739	3e-06	0.0355055	8812000	chr17	8840000	4000	hr8_vs_unstim
chr17	15844000	15900000	14	2.27587	4.39137	28.4506	3.97e-07	0.0114733	15848000	chr17	15904000	4000	hr8_vs_unstim
chr17	28032000	28044000	3	-1.57714	4.59491	30.2112	2.5e-07	0.00860274	28036000	chr17	28048000	4000	hr8_vs_unstim
chr17	29128000	29152000	6	-1.53948	5.02514	25.5226	1.39e-06	0.0240267	29132000	chr17	29156000	4000	hr8_vs_unstim
chr17	29128000	29156000	7	-1.68629	4.49392	25.3764	1.48e-06	0.0248796	29132000	chr17	29160000	4000	hr8_vs_unstim
chr17	29132000	29148000	4	-1.93803	5.02857	55.531	2.16e-11	1.32e-05	29136000	chr17	29152000	4000	hr8_vs_unstim
chr17	29132000	29152000	5	-1.68724	4.90628	41.6319	2.99e-09	0.000544929	29136000	chr17	29156000	4000	hr8_vs_unstim
chr17	29136000	29148000	3	-1.34859	5.22431	27.4344	7.81e-07	0.0173067	29140000	chr17	29152000	4000	hr8_vs_unstim
chr17	29632000	29644000	3	-1.2743	4.78102	23.1241	4.81e-06	0.0453443	29636000	chr17	29648000	4000	hr8_vs_unstim
chr17	30808000	30932000	31	-2.31249	5.40046	33.7663	1.28e-08	0.00131616	30812000	chr17	30936000	4000	hr8_vs_unstim
chr17	38252000	38264000	3	-1.2717	4.87438	23.7684	3.65e-06	0.039136	38256000	chr17	38268000	4000	hr8_vs_unstim
chr17	38252000	38268000	4	-1.5236	4.57201	29.4666	3.39e-07	0.0103787	38256000	chr17	38272000	4000	hr8_vs_unstim
chr17	38476000	38492000	4	-1.35586	5.05575	27.2122	8.56e-07	0.0181804	38480000	chr17	38496000	4000	hr8_vs_unstim
chr17	38720000	38736000	4	-1.3714	5.08408	26.9261	9.64e-07	0.0195916	38724000	chr17	38740000	4000	hr8_vs_unstim
chr17	38724000	38736000	3	-1.34776	4.96547	27.4046	7.9e-07	0.0174045	38728000	chr17	38740000	4000	hr8_vs_unstim
chr17	38740000	38760000	5	-1.7201	4.16366	29.2781	3.66e-07	0.0108903	38744000	chr17	38764000	4000	hr8_vs_unstim
chr17	39272000	39464000	48	-3.6198	4.42833	23.6355	4.52e-06	0.0437814	39276000	chr17	39468000	4000	hr8_vs_unstim
chr17	39272000	39476000	51	-3.56406	4.76841	28.2887	6.78e-07	0.0159152	39276000	chr17	39480000	4000	hr8_vs_unstim
chr17	39276000	39464000	47	-3.67095	4.92352	36.0607	3.38e-08	0.00256581	39280000	chr17	39468000	4000	hr8_vs_unstim
chr17	39276000	39476000	50	-3.26655	5.27889	35.224	4.62e-08	0.00306601	39280000	chr17	39480000	4000	hr8_vs_unstim
chr17	39276000	39480000	51	-3.00159	4.94345	26.8538	1.21e-06	0.0222467	39280000	chr17	39484000	4000	hr8_vs_unstim
chr17	39288000	39468000	45	-2.92738	5.10957	24.9386	2.63e-06	0.0332289	39292000	chr17	39472000	4000	hr8_vs_unstim
chr17	40404000	40420000	4	-1.62506	4.57833	32.9357	8.4e-08	0.00453523	40408000	chr17	40424000	4000	hr8_vs_unstim
chr17	40404000	40424000	5	-1.75894	4.25395	32.5629	9.74e-08	0.00492189	40408000	chr17	40428000	4000	hr8_vs_unstim
chr17	40408000	40436000	7	-1.65752	4.38776	22.5185	5.24e-06	0.047035	40412000	chr17	40440000	4000	hr8_vs_unstim
chr17	45736000	45852000	29	2.97829	4.29192	22.1898	3.42e-06	0.0380088	45740000	chr17	45856000	4000	hr8_vs_unstim
chr17	45744000	45880000	34	2.65581	4.41479	21.4461	4.94e-06	0.0458657	45748000	chr17	45884000	4000	hr8_vs_unstim
chr17	45752000	45852000	25	3.42904	4.24237	33.4079	3.82e-08	0.00274694	45756000	chr17	45856000	4000	hr8_vs_unstim
chr17	45772000	45796000	6	1.45946	5.18673	22.7887	4.64e-06	0.0444117	45776000	chr17	45800000	4000	hr8_vs_unstim
chr17	45772000	45808000	9	1.47694	5.36353	23.7487	3.03e-06	0.0357651	45776000	chr17	45812000	4000	hr8_vs_unstim
chr17	45772000	45812000	10	1.85708	5.50514	30.9617	1.37e-07	0.00604548	45776000	chr17	45816000	4000	hr8_vs_unstim
chr17	46796000	46860000	16	2.10418	4.72521	22.3993	2.89e-06	0.0349071	46800000	chr17	46864000	4000	hr8_vs_unstim
chr17	47812000	47864000	13	-1.87406	4.43878	23.9324	2.81e-06	0.0343887	47816000	chr17	47868000	4000	hr8_vs_unstim
chr17	48940000	49024000	21	-1.68084	5.93036	29.6166	1.95e-07	0.00735975	48944000	chr17	49028000	4000	hr8_vs_unstim
chr17	48944000	48984000	10	-1.81967	5.00177	29.08	3.04e-07	0.00978137	48948000	chr17	48988000	4000	hr8_vs_unstim
chr17	48948000	48976000	7	-1.69187	4.6753	23.8735	2.87e-06	0.0347809	48952000	chr17	48980000	4000	hr8_vs_unstim
chr17	54684000	54704000	5	-1.27085	4.81868	23.4551	4.18e-06	0.0419929	54688000	chr17	54708000	4000	hr8_vs_unstim
chr17	56196000	56232000	9	-2.10882	3.9003	24.3872	2.29e-06	0.030847	56200000	chr17	56236000	4000	hr8_vs_unstim
chr17	56196000	56244000	12	-1.9976	4.41735	25.4374	1.45e-06	0.024647	56200000	chr17	56248000	4000	hr8_vs_unstim
chr17	56196000	56248000	13	-1.96124	4.50099	26.9414	7.58e-07	0.0171264	56200000	chr17	56252000	4000	hr8_vs_unstim
chr17	56196000	56252000	14	-2.32446	4.52487	39.2365	4.73e-09	0.000738381	56200000	chr17	56256000	4000	hr8_vs_unstim
chr17	56200000	56248000	12	-2.03688	4.51358	28.4838	3.91e-07	0.0113608	56204000	chr17	56252000	4000	hr8_vs_unstim
chr17	56200000	56252000	13	-1.96117	4.75616	32.0147	8.86e-08	0.00469653	56204000	chr17	56256000	4000	hr8_vs_unstim
chr17	56200000	56256000	14	-1.86717	4.48816	25.1996	1.61e-06	0.0261616	56204000	chr17	56260000	4000	hr8_vs_unstim
chr17	57812000	57940000	32	1.87812	5.41057	21.3413	5.2e-06	0.046927	57816000	chr17	57944000	4000	hr8_vs_unstim
chr17	57816000	57936000	30	2.23007	5.99578	40.7333	4.87e-10	0.000142037	57820000	chr17	57940000	4000	hr8_vs_unstim
chr17	57816000	57940000	31	2.10014	5.98695	34.4093	9.42e-09	0.00113913	57820000	chr17	57944000	4000	hr8_vs_unstim
chr17	57816000	57944000	32	1.71184	6.03218	24.1269	1.32e-06	0.0232306	57820000	chr17	57948000	4000	hr8_vs_unstim
chr17	57816000	57960000	36	2.53766	5.60361	31.2333	5.54e-08	0.0034988	57820000	chr17	57964000	4000	hr8_vs_unstim
chr17	57820000	57932000	28	2.00332	6.17127	35.2422	6.36e-09	0.000899626	57824000	chr17	57936000	4000	hr8_vs_unstim
chr17	57820000	57936000	29	1.87103	6.40446	34.2638	1.01e-08	0.00117538	57824000	chr17	57940000	4000	hr8_vs_unstim
chr17	57820000	57944000	31	1.82008	5.99183	27.9401	2.07e-07	0.007605	57824000	chr17	57948000	4000	hr8_vs_unstim
chr17	57828000	57916000	22	2.35072	5.23216	35.1635	1.82e-08	0.00168587	57832000	chr17	57920000	4000	hr8_vs_unstim
chr17	57828000	57920000	23	1.77365	5.57062	26.0406	9.4e-07	0.0192273	57832000	chr17	57924000	4000	hr8_vs_unstim
chr17	57832000	57920000	22	1.99338	5.18172	24.9084	1.56e-06	0.0256722	57836000	chr17	57924000	4000	hr8_vs_unstim
chr17	57836000	57920000	21	1.95439	5.40145	29.8476	1.76e-07	0.0069301	57840000	chr17	57924000	4000	hr8_vs_unstim
chr17	57840000	57912000	18	1.94169	4.77104	21.1842	5.31e-06	0.0473375	57844000	chr17	57916000	4000	hr8_vs_unstim
chr17	57840000	57916000	19	1.98144	4.65227	21.4947	4.54e-06	0.0438822	57844000	chr17	57920000	4000	hr8_vs_unstim
chr17	61772000	61784000	3	-1.68444	5.39847	50.0713	1.42e-10	5.85e-05	61776000	chr17	61788000	4000	hr8_vs_unstim
chr17	61772000	61788000	4	-1.92702	4.87178	53.5575	4.23e-11	2.27e-05	61776000	chr17	61792000	4000	hr8_vs_unstim
chr17	62068000	62092000	6	-1.88302	4.02602	22.5553	5.15e-06	0.0467189	62072000	chr17	62096000	4000	hr8_vs_unstim
chr17	62072000	62096000	6	-1.56704	4.94575	24.6747	2.02e-06	0.0291775	62076000	chr17	62100000	4000	hr8_vs_unstim
chr17	62640000	62728000	22	-2.75243	4.02639	22.7355	4.16e-06	0.0419426	62644000	chr17	62732000	4000	hr8_vs_unstim
chr17	65396000	65428000	8	-1.54503	4.88341	24.5991	2.09e-06	0.0296244	65400000	chr17	65432000	4000	hr8_vs_unstim
chr17	71424000	71640000	54	-2.54942	5.30007	25.3248	2.25e-06	0.030625	71428000	chr17	71644000	4000	hr8_vs_unstim
chr17	71644000	71824000	45	-4.3079	4.304	23.9731	3.93e-06	0.0408458	71648000	chr17	71828000	4000	hr8_vs_unstim
chr17	71648000	71820000	43	-4.97128	4.07119	33.8587	1.66e-08	0.00158296	71652000	chr17	71824000	4000	hr8_vs_unstim
chr17	71648000	71948000	75	-5.25679	5.31339	23.4285	3.52e-06	0.0385303	71652000	chr17	71952000	4000	hr8_vs_unstim
chr17	71712000	71820000	27	-2.62465	4.13606	27.0837	5.92e-07	0.0148024	71716000	chr17	71824000	4000	hr8_vs_unstim
chr17	71712000	71832000	30	-3.45532	4.21611	30.6107	5.73e-08	0.00355368	71716000	chr17	71836000	4000	hr8_vs_unstim
chr17	72204000	72452000	62	-2.94704	5.19139	21.6784	5.48e-06	0.0479348	72208000	chr17	72456000	4000	hr8_vs_unstim
chr17	72648000	72760000	28	-2.71691	4.24489	21.7695	4.21e-06	0.0421813	72652000	chr17	72764000	4000	hr8_vs_unstim
chr17	72652000	72732000	20	-1.81947	5.09775	25.9516	4.99e-07	0.0132502	72656000	chr17	72736000	4000	hr8_vs_unstim
chr17	72652000	72764000	28	-2.41567	5.15563	34.3705	9.59e-09	0.00113913	72656000	chr17	72768000	4000	hr8_vs_unstim
chr17	73232000	73264000	8	1.84296	4.57944	25.7353	1.27e-06	0.0228063	73236000	chr17	73268000	4000	hr8_vs_unstim
chr17	74552000	74672000	30	-2.22012	4.65813	21.8809	3.98e-06	0.0410733	74556000	chr17	74676000	4000	hr8_vs_unstim
chr17	74552000	74676000	31	-2.25881	5.07131	28.4093	1.65e-07	0.00667774	74556000	chr17	74680000	4000	hr8_vs_unstim
chr17	75376000	75396000	5	-1.52173	4.53764	26.7374	1.04e-06	0.020435	75380000	chr17	75400000	4000	hr8_vs_unstim
chr17	76112000	76128000	4	-1.1288	5.88419	24.9191	2.24e-06	0.0305433	76116000	chr17	76132000	4000	hr8_vs_unstim
chr17	76232000	76392000	40	-3.1443	4.54619	24.2558	1.46e-06	0.0246851	76236000	chr17	76396000	4000	hr8_vs_unstim
chr17	76236000	76376000	35	-3.25704	3.96757	22.1769	3.44e-06	0.0380732	76240000	chr17	76380000	4000	hr8_vs_unstim
chr17	76244000	76280000	9	-2.36454	4.11566	37.3376	9.99e-09	0.00117069	76248000	chr17	76284000	4000	hr8_vs_unstim
chr17	76336000	76356000	5	-1.57029	4.36981	26.3752	1.21e-06	0.0223156	76340000	chr17	76360000	4000	hr8_vs_unstim
chr17	76752000	76772000	5	-1.45067	4.60454	24.8848	2.27e-06	0.0307409	76756000	chr17	76776000	4000	hr8_vs_unstim
chr17	76756000	76768000	3	-1.3555	4.85546	25.7112	1.6e-06	0.0260678	76760000	chr17	76772000	4000	hr8_vs_unstim
chr17	76760000	76796000	9	-2.07407	3.84851	24.1022	2.6e-06	0.0330112	76764000	chr17	76800000	4000	hr8_vs_unstim
chr17	76760000	76812000	13	-2.29986	4.11698	25.5244	1.4e-06	0.0241086	76764000	chr17	76816000	4000	hr8_vs_unstim
chr17	79988000	80272000	71	-4.38383	5.25235	24.5165	2.18e-06	0.0301606	79992000	chr17	80276000	4000	hr8_vs_unstim
chr17	80820000	80836000	4	-1.4779	5.21755	33.3867	7.03e-08	0.00404761	80824000	chr17	80840000	4000	hr8_vs_unstim
chr17	80824000	80836000	3	-1.24266	5.60349	27.6835	7.04e-07	0.0163045	80828000	chr17	80840000	4000	hr8_vs_unstim
chr18	2636000	2648000	3	-1.20666	5.04506	21.4423	3.65e-06	0.039126	2640000	chr18	2652000	4000	hr8_vs_unstim
chr18	2948000	2964000	4	-1.5129	4.21162	21.5795	3.4e-06	0.0379256	2952000	chr18	2968000	4000	hr8_vs_unstim
chr18	2964000	2980000	4	-1.37977	4.93968	28.0333	1.19e-07	0.00560434	2968000	chr18	2984000	4000	hr8_vs_unstim
chr18	2968000	2980000	3	-1.20123	5.35625	26.6059	2.5e-07	0.00860111	2972000	chr18	2984000	4000	hr8_vs_unstim
chr18	3440000	3452000	3	-1.72758	4.91652	39.0372	4.17e-10	0.000127066	3444000	chr18	3456000	4000	hr8_vs_unstim
chr18	3448000	3632000	46	2.81294	6.44208	21.5866	3.39e-06	0.0378908	3452000	chr18	3636000	4000	hr8_vs_unstim
chr18	3448000	3640000	48	3.34448	6.35683	27.0325	2.01e-07	0.00746119	3452000	chr18	3644000	4000	hr8_vs_unstim
chr18	3592000	3664000	18	1.85724	5.50426	25.4192	1.12e-06	0.0212937	3596000	chr18	3668000	4000	hr8_vs_unstim
chr18	3596000	3640000	11	2.24059	5.02703	32.3469	3.02e-08	0.00237403	3600000	chr18	3644000	4000	hr8_vs_unstim
chr18	3604000	3620000	4	1.52146	4.78864	26.0836	3.27e-07	0.0101979	3608000	chr18	3624000	4000	hr8_vs_unstim
chr18	8652000	8988000	84	-1.7177	8.84393	26.4506	2.72e-07	0.00907062	8656000	chr18	8992000	4000	hr8_vs_unstim
chr18	9104000	9116000	3	-1.18101	5.02066	20.6876	5.41e-06	0.0476892	9108000	chr18	9120000	4000	hr8_vs_unstim
chr18	9108000	9124000	4	-1.73343	4.58685	32.237	1.37e-08	0.00135834	9112000	chr18	9128000	4000	hr8_vs_unstim
chr18	9116000	9128000	3	-1.63148	4.77566	33.6138	6.73e-09	0.000931111	9120000	chr18	9132000	4000	hr8_vs_unstim
chr18	9116000	9132000	4	-1.27843	4.92753	23.1811	1.48e-06	0.0247881	9120000	chr18	9136000	4000	hr8_vs_unstim
chr18	9120000	9132000	3	-1.24104	5.44987	29.2107	6.5e-08	0.00380788	9124000	chr18	9136000	4000	hr8_vs_unstim
chr18	12764000	12776000	3	1.38022	4.82577	22.5116	2.09e-06	0.029657	12768000	chr18	12780000	4000	hr8_vs_unstim
chr18	20608000	20992000	96	-2.23158	8.79675	25.2692	1.19e-06	0.0219904	20612000	chr18	20996000	4000	hr8_vs_unstim
chr18	20632000	20712000	20	-2.85018	4.22034	27.6465	4.09e-07	0.0117467	20636000	chr18	20716000	4000	hr8_vs_unstim
chr18	21452000	21628000	44	-3.55356	5.30996	22.2975	2.63e-06	0.0332289	21456000	chr18	21632000	4000	hr8_vs_unstim
chr18	21556000	21568000	3	-1.17342	5.07915	21.0808	4.41e-06	0.0430856	21560000	chr18	21572000	4000	hr8_vs_unstim
chr18	32440000	32556000	29	2.54727	5.50166	21.3445	4.18e-06	0.042047	32444000	chr18	32560000	4000	hr8_vs_unstim
chr18	32444000	32556000	28	2.49241	5.80486	22.4563	2.36e-06	0.0313995	32448000	chr18	32560000	4000	hr8_vs_unstim
chr18	32444000	32620000	44	3.58836	5.32608	21.0049	5.1e-06	0.0465181	32448000	chr18	32624000	4000	hr8_vs_unstim
chr18	42268000	42464000	49	3.68219	6.26036	25.767	3.86e-07	0.0113056	42272000	chr18	42468000	4000	hr8_vs_unstim
chr18	46436000	46480000	11	-1.9355	4.54639	21.8211	4.49e-06	0.0436158	46440000	chr18	46484000	4000	hr8_vs_unstim
chr18	47804000	47900000	24	-2.74141	4.65425	23.6377	2.59e-06	0.0330112	47808000	chr18	47904000	4000	hr8_vs_unstim
chr18	55288000	55520000	58	4.63861	6.25762	23.3754	1.73e-06	0.0270948	55292000	chr18	55524000	4000	hr8_vs_unstim
chr18	55292000	55512000	55	4.51677	6.08676	21.2006	5.14e-06	0.046676	55296000	chr18	55516000	4000	hr8_vs_unstim
chr18	55320000	55708000	97	4.59571	7.27345	22.416	4.4e-06	0.043057	55324000	chr18	55712000	4000	hr8_vs_unstim
chr18	55332000	55504000	43	4.70026	5.0338	25.3762	5.5e-07	0.0141673	55336000	chr18	55508000	4000	hr8_vs_unstim
chr18	56340000	56352000	3	-1.0137	5.52064	20.6749	5.45e-06	0.0478029	56344000	chr18	56356000	4000	hr8_vs_unstim
chr18	60688000	60772000	21	2.50872	5.32441	27.5571	4.4e-07	0.0122814	60692000	chr18	60776000	4000	hr8_vs_unstim
chr18	67612000	67624000	3	-1.26859	4.96394	22.9547	1.66e-06	0.0265122	67616000	chr18	67628000	4000	hr8_vs_unstim
chr18	68264000	68320000	14	-2.30928	4.09551	23.0523	2.47e-06	0.0322083	68268000	chr18	68324000	4000	hr8_vs_unstim
chr18	68288000	68316000	7	-1.612	5.03383	26.2053	3.07e-07	0.00984918	68292000	chr18	68320000	4000	hr8_vs_unstim
chr18	68288000	68324000	9	-1.73332	4.61062	23.0574	1.57e-06	0.0257838	68292000	chr18	68328000	4000	hr8_vs_unstim
chr18	68292000	68324000	8	-2.19889	4.37506	30.0969	4.11e-08	0.00286903	68296000	chr18	68328000	4000	hr8_vs_unstim
chr18	68396000	68424000	7	-1.8038	4.47543	21.5409	3.47e-06	0.0382513	68400000	chr18	68428000	4000	hr8_vs_unstim
chr18	72016000	72152000	34	-1.85134	6.46557	22.9694	1.82e-06	0.0276621	72020000	chr18	72156000	4000	hr8_vs_unstim
chr18	72016000	72160000	36	-1.6791	7.18526	25.2066	6e-07	0.0148588	72020000	chr18	72164000	4000	hr8_vs_unstim
chr18	77476000	77808000	83	-4.64006	6.68223	22.7883	1.82e-06	0.0276621	77480000	chr18	77812000	4000	hr8_vs_unstim
chr19	3984000	4112000	32	-3.26329	4.48553	24.1256	2.37e-06	0.0314192	3988000	chr19	4116000	4000	hr8_vs_unstim
chr19	5964000	5976000	3	-1.37869	5.65873	30.1428	3.94e-06	0.040886	5968000	chr19	5980000	4000	hr8_vs_unstim
chr19	6500000	6828000	82	4.09374	6.51727	23.9306	1e-06	0.0200034	6504000	chr19	6832000	4000	hr8_vs_unstim
chr19	6648000	6736000	22	2.6803	5.38855	32.8116	3.13e-08	0.0024299	6652000	chr19	6740000	4000	hr8_vs_unstim
chr19	6656000	6736000	20	2.25333	4.9877	25.4952	1.11e-06	0.0212514	6660000	chr19	6740000	4000	hr8_vs_unstim
chr19	6660000	6736000	19	3.03262	5.2984	50.7754	2.66e-11	1.55e-05	6664000	chr19	6740000	4000	hr8_vs_unstim
chr19	6664000	6736000	18	3.16417	5.45312	55.0272	5.06e-12	4.53e-06	6668000	chr19	6740000	4000	hr8_vs_unstim
chr19	6668000	6732000	16	1.65779	5.76343	22.4725	4.42e-06	0.0431709	6672000	chr19	6736000	4000	hr8_vs_unstim
chr19	6668000	6736000	17	2.26503	5.38651	31.1584	9.01e-08	0.00472244	6672000	chr19	6740000	4000	hr8_vs_unstim
chr19	6672000	6736000	16	2.13202	4.97639	22.0559	5.36e-06	0.0475554	6676000	chr19	6740000	4000	hr8_vs_unstim
chr19	6680000	6732000	13	2.30215	5.59952	40.9945	9.89e-10	0.000239001	6684000	chr19	6736000	4000	hr8_vs_unstim
chr19	6696000	6732000	9	1.74435	5.20937	24.3498	3.51e-06	0.0384707	6700000	chr19	6736000	4000	hr8_vs_unstim
chr19	6708000	6732000	6	1.60935	5.75785	28.0273	7.96e-07	0.0174463	6712000	chr19	6736000	4000	hr8_vs_unstim
chr19	6720000	6732000	3	1.20812	6.07564	30.137	3.95e-06	0.0408965	6724000	chr19	6736000	4000	hr8_vs_unstim
chr19	8548000	8628000	20	-2.35688	4.81845	24.5247	1.73e-06	0.0270869	8552000	chr19	8632000	4000	hr8_vs_unstim
chr19	8548000	8644000	24	-2.22919	5.42608	30.6502	8.32e-08	0.00449903	8552000	chr19	8648000	4000	hr8_vs_unstim
chr19	8552000	8640000	22	-1.86687	5.41678	23.3639	2.44e-06	0.0319646	8556000	chr19	8644000	4000	hr8_vs_unstim
chr19	8552000	8644000	23	-2.34113	5.45168	34.9894	1.18e-08	0.001278	8556000	chr19	8648000	4000	hr8_vs_unstim
chr19	8556000	8648000	23	-2.51145	4.76433	26.3929	5.9e-07	0.0147802	8560000	chr19	8652000	4000	hr8_vs_unstim
chr19	8568000	8640000	18	-2.22288	5.13224	31.6847	7.17e-08	0.00410712	8572000	chr19	8644000	4000	hr8_vs_unstim
chr19	8568000	8644000	19	-1.9591	5.01626	22.9213	3.6e-06	0.0389108	8572000	chr19	8648000	4000	hr8_vs_unstim
chr19	8572000	8640000	17	-2.1445	5.51109	36.3929	9.48e-09	0.00113913	8576000	chr19	8644000	4000	hr8_vs_unstim
chr19	8576000	8640000	16	-2.19681	4.98886	25.5239	1.1e-06	0.0210974	8580000	chr19	8644000	4000	hr8_vs_unstim
chr19	8580000	8632000	13	-1.82413	5.37812	27.9677	3.1e-07	0.00989645	8584000	chr19	8636000	4000	hr8_vs_unstim
chr19	8580000	8636000	14	-1.80551	5.43265	28.0001	3.05e-07	0.00982162	8584000	chr19	8640000	4000	hr8_vs_unstim
chr19	8584000	8632000	12	-1.77263	5.21773	23.4258	2.52e-06	0.0325725	8588000	chr19	8636000	4000	hr8_vs_unstim
chr19	9876000	9892000	4	-1.54703	5.49918	35.2879	1.02e-06	0.0202533	9880000	chr19	9896000	4000	hr8_vs_unstim
chr19	14096000	14116000	5	-1.53618	5.19691	29.0868	5.28e-06	0.0472097	14100000	chr19	14120000	4000	hr8_vs_unstim
chr19	14608000	14656000	12	-1.68496	5.21526	23.2476	2.74e-06	0.0338941	14612000	chr19	14660000	4000	hr8_vs_unstim
chr19	14608000	14660000	13	-1.80546	5.15905	25.5557	9.37e-07	0.0192273	14612000	chr19	14664000	4000	hr8_vs_unstim
chr19	14616000	14628000	3	-1.22656	5.89431	31.4888	2.74e-06	0.0339076	14620000	chr19	14632000	4000	hr8_vs_unstim
chr19	14616000	14632000	4	-1.65471	5.17001	33.4574	1.63e-06	0.0263217	14620000	chr19	14636000	4000	hr8_vs_unstim
chr19	14616000	14660000	11	-1.6591	5.2162	22.9442	3.16e-06	0.036436	14620000	chr19	14664000	4000	hr8_vs_unstim
chr19	16208000	16528000	80	-3.35087	6.52472	22.1311	2.55e-06	0.0327519	16212000	chr19	16532000	4000	hr8_vs_unstim
chr19	16300000	16496000	49	-2.72112	5.80677	30.3606	2.25e-07	0.00809814	16304000	chr19	16500000	4000	hr8_vs_unstim
chr19	16436000	16480000	11	-1.57519	6.46701	40.277	1.34e-09	0.000295714	16440000	chr19	16484000	4000	hr8_vs_unstim
chr19	16436000	16492000	14	-1.36028	5.80981	21.655	5.79e-06	0.0492193	16440000	chr19	16496000	4000	hr8_vs_unstim
chr19	16440000	16472000	8	-1.53076	5.86835	30.597	2.91e-07	0.00945903	16444000	chr19	16476000	4000	hr8_vs_unstim
chr19	16444000	16456000	3	-1.39478	5.91755	32.4734	2.11e-06	0.0297629	16448000	chr19	16460000	4000	hr8_vs_unstim
chr19	16456000	16472000	4	-1.25821	5.95575	31.9673	2.41e-06	0.0317248	16460000	chr19	16476000	4000	hr8_vs_unstim
chr19	16476000	16492000	4	-2.06734	5.53514	64.0132	2.5e-09	0.000485917	16480000	chr19	16496000	4000	hr8_vs_unstim
chr19	16480000	16492000	3	-1.42447	5.96878	40.1256	3.16e-07	0.00995919	16484000	chr19	16496000	4000	hr8_vs_unstim
chr19	19160000	19248000	22	-2.02765	5.80175	32.994	2.88e-08	0.00230304	19164000	chr19	19252000	4000	hr8_vs_unstim
chr19	35340000	35416000	19	-3.42482	4.49185	36.1272	1.06e-08	0.00119622	35344000	chr19	35420000	4000	hr8_vs_unstim
chr19	35464000	35480000	4	-1.68802	5.46547	40.242	3.07e-07	0.00984918	35468000	chr19	35484000	4000	hr8_vs_unstim
chr19	35632000	35704000	18	-1.8307	5.28711	23.3344	2.98e-06	0.0354354	35636000	chr19	35708000	4000	hr8_vs_unstim
chr19	35680000	35696000	4	-1.71994	4.82921	29.2246	5.08e-06	0.0464517	35684000	chr19	35700000	4000	hr8_vs_unstim
chr19	39888000	39900000	3	-1.01445	6.55191	32.4664	2.12e-06	0.0297629	39892000	chr19	39904000	4000	hr8_vs_unstim
chr19	40360000	40496000	34	3.72105	4.32789	26.8903	6.98e-07	0.016208	40364000	chr19	40500000	4000	hr8_vs_unstim
chr19	40648000	40704000	14	1.81724	5.17024	22.0033	4.91e-06	0.0457661	40652000	chr19	40708000	4000	hr8_vs_unstim
chr19	41164000	41488000	81	-3.43844	6.59874	21.238	4.07e-06	0.0413909	41168000	chr19	41492000	4000	hr8_vs_unstim
chr19	42376000	42388000	3	-1.57209	5.66519	37.1277	6.48e-07	0.0155505	42380000	chr19	42392000	4000	hr8_vs_unstim
chr19	42376000	42392000	4	-1.84716	5.68102	53.8311	1.66e-08	0.00158296	42380000	chr19	42396000	4000	hr8_vs_unstim
chr19	42376000	42412000	9	-1.76915	5.06207	25.6529	2.06e-06	0.0295395	42380000	chr19	42416000	4000	hr8_vs_unstim
chr19	42588000	42684000	24	3.04995	4.45651	22.9758	2.93e-06	0.0351374	42592000	chr19	42688000	4000	hr8_vs_unstim
chr19	42620000	42932000	78	-4.24369	6.13005	21.4596	3.62e-06	0.0390012	42624000	chr19	42936000	4000	hr8_vs_unstim
chr19	49972000	49996000	6	-1.72442	4.98505	24.9144	2.79e-06	0.0342288	49976000	chr19	50000000	4000	hr8_vs_unstim
chr19	49972000	50000000	7	-1.6626	5.1377	24.0339	4e-06	0.0410935	49976000	chr19	50004000	4000	hr8_vs_unstim
chr19	51924000	52012000	22	2.38718	5.58368	30.4905	8.95e-08	0.00469653	51928000	chr19	52016000	4000	hr8_vs_unstim
chr19	51972000	52016000	11	1.94947	5.03478	22.2577	4.36e-06	0.0429013	51976000	chr19	52020000	4000	hr8_vs_unstim
chr19	51972000	52020000	12	2.3695	4.89723	30.0293	1.22e-07	0.00566945	51976000	chr19	52024000	4000	hr8_vs_unstim
chr19	51976000	52016000	10	2.0942	5.6584	38.9295	2.4e-09	0.000470321	51980000	chr19	52020000	4000	hr8_vs_unstim
chr2	8684000	8816000	33	2.53136	3.64613	21.84	4.02e-06	0.041166	8688000	chr2	8820000	4000	hr8_vs_unstim
chr2	8684000	8820000	34	3.13185	3.20306	22.3508	3.12e-06	0.0363312	8688000	chr2	8824000	4000	hr8_vs_unstim
chr2	9704000	9932000	57	3.50138	4.37876	22.3166	5.09e-06	0.0465034	9708000	chr2	9936000	4000	hr8_vs_unstim
chr2	10720000	10804000	21	3.03939	2.91421	28.7058	8.74e-08	0.00466145	10724000	chr2	10808000	4000	hr8_vs_unstim
chr2	11616000	11732000	29	2.90449	3.28454	21.7671	4.17e-06	0.0419585	11620000	chr2	11736000	4000	hr8_vs_unstim
chr2	11620000	11716000	24	2.95398	3.21153	24.2948	8.49e-07	0.01806	11624000	chr2	11720000	4000	hr8_vs_unstim
chr2	11620000	11728000	27	2.79501	3.13615	22.3499	2.32e-06	0.031125	11624000	chr2	11732000	4000	hr8_vs_unstim
chr2	11624000	11712000	22	3.35274	3.14373	26.8663	2.25e-07	0.00809814	11628000	chr2	11716000	4000	hr8_vs_unstim
chr2	11624000	11720000	24	2.85224	3.05317	22.1662	2.56e-06	0.0327519	11628000	chr2	11724000	4000	hr8_vs_unstim
chr2	12360000	12668000	77	-7.20445	3.88827	27.0271	5.56e-07	0.0142279	12364000	chr2	12672000	4000	hr8_vs_unstim
chr2	12696000	12856000	40	3.03349	3.77189	23.8597	1.1e-06	0.0210974	12700000	chr2	12860000	4000	hr8_vs_unstim
chr2	16084000	16168000	21	2.36205	3.1246	21.0564	4.55e-06	0.0438822	16088000	chr2	16172000	4000	hr8_vs_unstim
chr2	25508000	25772000	66	6.74845	4.36964	34.2056	2.39e-08	0.00203861	25512000	chr2	25776000	4000	hr8_vs_unstim
chr2	25508000	25780000	68	4.77788	4.30268	26.6316	6.64e-07	0.0157423	25512000	chr2	25784000	4000	hr8_vs_unstim
chr2	25520000	25768000	62	3.69703	4.18847	22.6839	4.31e-06	0.0426991	25524000	chr2	25772000	4000	hr8_vs_unstim
chr2	29180000	29232000	13	-1.66698	3.4638	21.6109	5.81e-06	0.0492677	29184000	chr2	29236000	4000	hr8_vs_unstim
chr2	30316000	30380000	16	-2.76781	2.23227	23.2305	1.61e-06	0.0261616	30320000	chr2	30384000	4000	hr8_vs_unstim
chr2	36200000	36476000	69	2.99124	5.03291	23.3393	2.96e-06	0.0352852	36204000	chr2	36480000	4000	hr8_vs_unstim
chr2	37496000	37632000	34	3.92552	2.5562	24.142	1.29e-06	0.0230298	37500000	chr2	37636000	4000	hr8_vs_unstim
chr2	37548000	37620000	18	2.28236	2.81432	22.1296	2.83e-06	0.0344549	37552000	chr2	37624000	4000	hr8_vs_unstim
chr2	42332000	42348000	4	-1.28817	3.79651	30.161	2.36e-07	0.00835124	42336000	chr2	42352000	4000	hr8_vs_unstim
chr2	42332000	42352000	5	-1.40217	3.74024	32.5555	8.92e-08	0.00469653	42336000	chr2	42356000	4000	hr8_vs_unstim
chr2	43364000	43384000	5	-1.36419	3.29018	27.4682	7.18e-07	0.0165704	43368000	chr2	43388000	4000	hr8_vs_unstim
chr2	43368000	43380000	3	-1.27661	3.98139	32.4834	9.18e-08	0.00477198	43372000	chr2	43384000	4000	hr8_vs_unstim
chr2	44308000	44548000	60	3.07238	4.53454	23.6767	2.75e-06	0.0339457	44312000	chr2	44552000	4000	hr8_vs_unstim
chr2	45876000	46120000	61	-3.34725	4.43483	25.3524	1.3e-06	0.0230298	45880000	chr2	46124000	4000	hr8_vs_unstim
chr2	54188000	54320000	33	-3.41347	2.82803	25.6582	6.16e-07	0.0151241	54192000	chr2	54324000	4000	hr8_vs_unstim
chr2	54784000	54816000	8	-1.52706	3.35275	23.2304	2.51e-06	0.0324931	54788000	chr2	54820000	4000	hr8_vs_unstim
chr2	55744000	55840000	24	-2.43023	2.94449	23.9219	1.03e-06	0.0202847	55748000	chr2	55844000	4000	hr8_vs_unstim
chr2	64368000	64548000	45	2.24815	5.14191	27.618	2.99e-07	0.00966018	64372000	chr2	64552000	4000	hr8_vs_unstim
chr2	64432000	64552000	30	1.84723	4.44043	21.2116	5.49e-06	0.0479634	64436000	chr2	64556000	4000	hr8_vs_unstim
chr2	64444000	64548000	26	2.02624	3.89407	24.7437	6.73e-07	0.0158542	64448000	chr2	64552000	4000	hr8_vs_unstim
chr2	64732000	64788000	14	2.09628	3.01474	25.3074	1.03e-06	0.0202533	64736000	chr2	64792000	4000	hr8_vs_unstim
chr2	68584000	68672000	22	2.8675	3.41188	29.332	6.34e-08	0.00376882	68588000	chr2	68676000	4000	hr8_vs_unstim
chr2	68588000	68668000	20	2.12391	3.72094	24.0046	1.09e-06	0.0209737	68592000	chr2	68672000	4000	hr8_vs_unstim
chr2	68980000	68996000	4	-1.28892	3.32419	23.8043	3.41e-06	0.0379577	68984000	chr2	69000000	4000	hr8_vs_unstim
chr2	70564000	70872000	77	-1.97574	6.31481	29.8327	1.6e-07	0.00656781	70568000	chr2	70876000	4000	hr8_vs_unstim
chr2	84696000	85172000	119	-5.00761	5.38009	26.0079	5.64e-07	0.014339	84700000	chr2	85176000	4000	hr8_vs_unstim
chr2	85164000	85228000	16	2.47478	3.46542	31.2524	2.77e-08	0.00224962	85168000	chr2	85232000	4000	hr8_vs_unstim
chr2	86080000	86264000	46	-2.13681	4.77302	23.0838	2.56e-06	0.0328127	86084000	chr2	86268000	4000	hr8_vs_unstim
chr2	86096000	86288000	48	-2.5542	4.36164	23.4382	2.16e-06	0.0299632	86100000	chr2	86292000	4000	hr8_vs_unstim
chr2	86104000	86300000	49	-2.53853	4.60571	25.86	6.84e-07	0.015986	86108000	chr2	86304000	4000	hr8_vs_unstim
chr2	86112000	86264000	38	-2.00013	4.64147	23.875	1.09e-06	0.0210323	86116000	chr2	86268000	4000	hr8_vs_unstim
chr2	86112000	86300000	47	-2.45573	4.97727	31.1253	5.83e-08	0.00357761	86116000	chr2	86304000	4000	hr8_vs_unstim
chr2	86112000	86304000	48	-2.07667	5.1809	26.7052	4.59e-07	0.0126431	86116000	chr2	86308000	4000	hr8_vs_unstim
chr2	86116000	86260000	36	-2.58886	4.47868	34.2981	5.35e-09	0.000815153	86120000	chr2	86264000	4000	hr8_vs_unstim
chr2	88356000	88460000	26	1.70525	4.56245	25.6187	4.28e-07	0.0121115	88360000	chr2	88464000	4000	hr8_vs_unstim
chr2	97192000	97220000	7	-1.55263	3.29307	23.8996	1.82e-06	0.0277126	97196000	chr2	97224000	4000	hr8_vs_unstim
chr2	99252000	99372000	30	-2.69013	3.40836	25.3095	7.31e-07	0.0167497	99256000	chr2	99376000	4000	hr8_vs_unstim
chr2	99288000	99312000	6	-1.59175	3.06375	21.5927	5.48e-06	0.0479348	99292000	chr2	99316000	4000	hr8_vs_unstim
chr2	101920000	101948000	7	-1.68354	3.19438	28.0699	2.58e-07	0.00872638	101924000	chr2	101952000	4000	hr8_vs_unstim
chr2	102320000	102332000	3	-1.62639	2.76867	26.7125	9.86e-07	0.0198974	102324000	chr2	102336000	4000	hr8_vs_unstim
chr2	102508000	103080000	143	5.15831	6.51624	23.2829	2.02e-06	0.0291965	102512000	chr2	103084000	4000	hr8_vs_unstim
chr2	102636000	102776000	35	2.72882	3.47016	22.789	2.52e-06	0.032551	102640000	chr2	102780000	4000	hr8_vs_unstim
chr2	102652000	102768000	29	2.57136	3.40651	21.2524	5.38e-06	0.0476096	102656000	chr2	102772000	4000	hr8_vs_unstim
chr2	102704000	102844000	35	2.67669	3.42914	21.197	5.53e-06	0.048202	102708000	chr2	102848000	4000	hr8_vs_unstim
chr2	102856000	103068000	53	2.60655	4.2937	21.9927	4.33e-06	0.0427633	102860000	chr2	103072000	4000	hr8_vs_unstim
chr2	102984000	103060000	19	1.96701	3.28517	20.8841	5.36e-06	0.0475545	102988000	chr2	103064000	4000	hr8_vs_unstim
chr2	103092000	103224000	33	4.27376	2.8922	25.2276	7.6e-07	0.0171407	103096000	chr2	103228000	4000	hr8_vs_unstim
chr2	103096000	103228000	33	3.29947	3.16761	21.5161	4.72e-06	0.044915	103100000	chr2	103232000	4000	hr8_vs_unstim
chr2	106372000	106408000	9	-1.71541	2.8645	23.3307	2.39e-06	0.0315439	106376000	chr2	106412000	4000	hr8_vs_unstim
chr2	109628000	109828000	50	-4.22086	3.47894	26.1526	5.95e-07	0.0148115	109632000	chr2	109832000	4000	hr8_vs_unstim
chr2	109744000	109784000	10	-2.3356	2.52165	24.6338	1.4e-06	0.0241318	109748000	chr2	109788000	4000	hr8_vs_unstim
chr2	109756000	109788000	8	-1.87582	2.75794	25.0287	1.07e-06	0.0208337	109760000	chr2	109792000	4000	hr8_vs_unstim
chr2	111604000	111796000	48	3.70666	4.20098	31.6241	4.63e-08	0.00306601	111608000	chr2	111800000	4000	hr8_vs_unstim
chr2	112376000	112468000	23	3.76625	2.49141	28.0913	1.2e-07	0.00561234	112380000	chr2	112472000	4000	hr8_vs_unstim
chr2	122288000	122404000	29	-2.41181	3.61474	23.022	2.24e-06	0.0305763	122292000	chr2	122408000	4000	hr8_vs_unstim
chr2	127292000	127396000	26	-3.34659	2.41749	23.8067	1.09e-06	0.0210323	127296000	chr2	127400000	4000	hr8_vs_unstim
chr2	127412000	127516000	26	-2.258	2.88733	21.3637	3.88e-06	0.0405505	127416000	chr2	127520000	4000	hr8_vs_unstim
chr2	127412000	127520000	27	-2.3918	2.73569	20.9672	4.77e-06	0.0451796	127416000	chr2	127524000	4000	hr8_vs_unstim
chr2	127412000	127528000	29	-2.41281	3.66887	23.694	1.61e-06	0.0261616	127416000	chr2	127532000	4000	hr8_vs_unstim
chr2	127416000	127520000	26	-2.75792	2.61582	23.1611	1.53e-06	0.0253872	127420000	chr2	127524000	4000	hr8_vs_unstim
chr2	128348000	128404000	14	-1.78908	3.33908	22.8303	3.26e-06	0.0371363	128352000	chr2	128408000	4000	hr8_vs_unstim
chr2	136872000	136884000	3	-1.17405	4.02763	25.9649	1.35e-06	0.0235321	136876000	chr2	136888000	4000	hr8_vs_unstim
chr2	136872000	136888000	4	-1.2145	3.68823	25.4599	1.68e-06	0.0266244	136876000	chr2	136892000	4000	hr8_vs_unstim
chr2	136872000	136892000	5	-1.87715	3.78364	62.5765	1.62e-12	1.74e-06	136876000	chr2	136896000	4000	hr8_vs_unstim
chr2	136872000	137136000	66	-1.73651	6.27777	23.579	2.65e-06	0.0332584	136876000	chr2	137140000	4000	hr8_vs_unstim
chr2	136876000	136888000	3	-1.2035	3.7451	26.4645	1.1e-06	0.0210447	136880000	chr2	136892000	4000	hr8_vs_unstim
chr2	136876000	136892000	4	-1.2365	3.63433	26.3269	1.16e-06	0.0216675	136880000	chr2	136896000	4000	hr8_vs_unstim
chr2	136892000	136992000	25	-1.87732	3.60321	22.55	2.1e-06	0.0296923	136896000	chr2	136996000	4000	hr8_vs_unstim
chr2	136892000	137084000	48	-2.04072	4.91657	22.4729	3.44e-06	0.0380732	136896000	chr2	137088000	4000	hr8_vs_unstim
chr2	136892000	137136000	61	-2.21038	5.25952	24.2455	2.13e-06	0.0298572	136896000	chr2	137140000	4000	hr8_vs_unstim
chr2	136896000	136996000	25	-2.48162	2.909	23.8125	1.09e-06	0.0209959	136900000	chr2	137000000	4000	hr8_vs_unstim
chr2	158260000	158296000	9	-1.66622	3.03874	23.4345	2.27e-06	0.0307409	158264000	chr2	158300000	4000	hr8_vs_unstim
chr2	158264000	158276000	3	-1.38467	3.16213	25.7108	1.51e-06	0.0251019	158268000	chr2	158280000	4000	hr8_vs_unstim
chr2	158280000	158292000	3	-1.18855	3.7465	24.0166	3.11e-06	0.0362911	158284000	chr2	158296000	4000	hr8_vs_unstim
chr2	159896000	159976000	20	-2.53232	2.50513	21.2995	4.33e-06	0.0427403	159900000	chr2	159980000	4000	hr8_vs_unstim
chr2	161268000	161332000	16	-2.48886	2.87035	24.9175	6.82e-07	0.0159591	161272000	chr2	161336000	4000	hr8_vs_unstim
chr2	162840000	162928000	22	-2.66687	2.65857	20.8399	5.09e-06	0.0465034	162844000	chr2	162932000	4000	hr8_vs_unstim
chr2	169820000	169980000	40	-2.78073	3.68697	20.8684	5.16e-06	0.0467189	169824000	chr2	169984000	4000	hr8_vs_unstim
chr2	171952000	171996000	11	-1.79855	3.13764	23.1924	2.75e-06	0.0339554	171956000	chr2	172000000	4000	hr8_vs_unstim
chr2	172952000	172968000	4	-1.26934	3.3907	23.4333	4e-06	0.0410935	172956000	chr2	172972000	4000	hr8_vs_unstim
chr2	173460000	173564000	26	2.75458	3.00544	21.5974	3.44e-06	0.0380732	173464000	chr2	173568000	4000	hr8_vs_unstim
chr2	175444000	175464000	5	-1.28569	3.4166	26.9035	9.1e-07	0.0189161	175448000	chr2	175468000	4000	hr8_vs_unstim
chr2	175444000	175472000	7	-1.51897	3.2101	21.8055	4.95e-06	0.0458706	175448000	chr2	175476000	4000	hr8_vs_unstim
chr2	181988000	182004000	4	-1.50883	2.63962	23.666	3.62e-06	0.0389811	181992000	chr2	182008000	4000	hr8_vs_unstim
chr2	191224000	191676000	113	4.12483	5.60231	21.2433	5.72e-06	0.04887	191228000	chr2	191680000	4000	hr8_vs_unstim
chr2	191500000	191668000	42	2.84625	3.77469	23.144	1.59e-06	0.026	191504000	chr2	191672000	4000	hr8_vs_unstim
chr2	191512000	191604000	23	2.89502	2.9122	23.5552	1.24e-06	0.0226365	191516000	chr2	191608000	4000	hr8_vs_unstim
chr2	191512000	191620000	27	3.00322	2.71192	22.701	1.94e-06	0.0285419	191516000	chr2	191624000	4000	hr8_vs_unstim
chr2	191512000	191644000	33	3.30754	2.95154	24.0538	1.35e-06	0.0235298	191516000	chr2	191648000	4000	hr8_vs_unstim
chr2	191512000	191664000	38	3.30227	3.50653	23.8227	1.12e-06	0.0213167	191516000	chr2	191668000	4000	hr8_vs_unstim
chr2	191516000	191584000	17	2.44408	2.69961	21.297	4.33e-06	0.0427633	191520000	chr2	191588000	4000	hr8_vs_unstim
chr2	191516000	191628000	28	2.99511	3.33237	23.228	2.03e-06	0.0292152	191520000	chr2	191632000	4000	hr8_vs_unstim
chr2	191540000	191620000	20	3.02063	2.40924	24.0076	1.08e-06	0.0209737	191544000	chr2	191624000	4000	hr8_vs_unstim
chr2	191540000	191628000	22	2.45553	3.02327	22.3483	2.33e-06	0.031125	191544000	chr2	191632000	4000	hr8_vs_unstim
chr2	191588000	191604000	4	1.74687	3.24526	38.7879	7.69e-09	0.00100185	191592000	chr2	191608000	4000	hr8_vs_unstim
chr2	197012000	197080000	17	-2.29761	2.90392	25.0914	6.24e-07	0.015205	197016000	chr2	197084000	4000	hr8_vs_unstim
chr2	197028000	197040000	3	-1.47903	3.05868	26.9153	9.06e-07	0.0188664	197032000	chr2	197044000	4000	hr8_vs_unstim
chr2	197040000	197072000	8	-1.58611	3.57761	28.7422	1.89e-07	0.00722641	197044000	chr2	197076000	4000	hr8_vs_unstim
chr2	197048000	197064000	4	-1.23831	3.50697	23.8618	3.32e-06	0.0375287	197052000	chr2	197068000	4000	hr8_vs_unstim
chr2	197056000	197068000	3	-1.29702	3.54161	26.5946	1.04e-06	0.020374	197060000	chr2	197072000	4000	hr8_vs_unstim
chr2	197056000	197072000	4	-1.26926	3.41319	24.4403	2.59e-06	0.0330112	197060000	chr2	197076000	4000	hr8_vs_unstim
chr2	197076000	197092000	4	-1.33265	3.24329	24.9614	2.07e-06	0.0295552	197080000	chr2	197096000	4000	hr8_vs_unstim
chr2	197108000	197120000	3	-1.21304	3.93025	27.7061	6.5e-07	0.015592	197112000	chr2	197124000	4000	hr8_vs_unstim
chr2	197112000	197124000	3	-1.20976	3.46233	23.5753	3.76e-06	0.0398039	197116000	chr2	197128000	4000	hr8_vs_unstim
chr2	198088000	198116000	7	-2.07102	2.90313	32.5034	3.37e-08	0.00256581	198092000	chr2	198120000	4000	hr8_vs_unstim
chr2	198144000	198168000	6	-1.55262	3.12629	22.2472	4e-06	0.0410935	198148000	chr2	198172000	4000	hr8_vs_unstim
chr2	198148000	198160000	3	-1.2728	3.18845	22.6683	5.57e-06	0.0482709	198152000	chr2	198164000	4000	hr8_vs_unstim
chr2	198152000	198164000	3	-1.38688	3.23012	26.6964	9.93e-07	0.0199576	198156000	chr2	198168000	4000	hr8_vs_unstim
chr2	201988000	202020000	8	-1.70111	3.35901	29.9689	1.07e-07	0.0052471	201992000	chr2	202024000	4000	hr8_vs_unstim
chr2	202100000	202120000	5	-1.36428	2.8914	22.8728	5.1e-06	0.0465034	202104000	chr2	202124000	4000	hr8_vs_unstim
chr2	203104000	203124000	5	-1.35327	3.25622	22.8454	5.16e-06	0.0467189	203108000	chr2	203128000	4000	hr8_vs_unstim
chr2	204588000	204600000	3	-1.48395	3.26575	32.9683	7.55e-08	0.00429997	204592000	chr2	204604000	4000	hr8_vs_unstim
chr2	205752000	205812000	15	-2.26797	2.73655	21.2783	4.37e-06	0.0429701	205756000	chr2	205816000	4000	hr8_vs_unstim
chr2	205752000	205832000	20	-3.0437	2.06306	22.7821	2.03e-06	0.029211	205756000	chr2	205836000	4000	hr8_vs_unstim
chr2	205836000	205940000	26	-2.18816	3.37168	24.19	8.96e-07	0.0187191	205840000	chr2	205944000	4000	hr8_vs_unstim
chr2	208012000	208024000	3	-1.32142	3.39789	25.6483	1.55e-06	0.0255986	208016000	chr2	208028000	4000	hr8_vs_unstim
chr2	219324000	219412000	22	-3.2334	2.52938	21.7897	3.11e-06	0.0362911	219328000	chr2	219416000	4000	hr8_vs_unstim
chr2	228248000	228416000	42	2.92769	3.87376	24.6142	7.47e-07	0.0169464	228252000	chr2	228420000	4000	hr8_vs_unstim
chr2	228252000	228340000	22	2.79811	3.11218	22.3979	2.27e-06	0.0307409	228256000	chr2	228344000	4000	hr8_vs_unstim
chr2	228268000	228324000	14	2.53193	2.72691	26.395	6.2e-07	0.0151422	228272000	chr2	228328000	4000	hr8_vs_unstim
chr2	228268000	228332000	16	2.81641	3.20916	34.0509	6.81e-09	0.000936878	228272000	chr2	228336000	4000	hr8_vs_unstim
chr2	228268000	228412000	36	3.42107	3.50357	23.5877	1.27e-06	0.0227967	228272000	chr2	228416000	4000	hr8_vs_unstim
chr2	228268000	228424000	39	3.04724	3.74537	20.6708	5.71e-06	0.0488634	228272000	chr2	228428000	4000	hr8_vs_unstim
chr2	228272000	228324000	13	2.19158	2.85379	22.2045	4.38e-06	0.0430208	228276000	chr2	228328000	4000	hr8_vs_unstim
chr2	228272000	228332000	15	2.62311	3.10982	25.5222	5.01e-07	0.0133028	228276000	chr2	228336000	4000	hr8_vs_unstim
chr2	228272000	228336000	16	3.26587	2.85271	34.4581	5.56e-09	0.000837198	228276000	chr2	228340000	4000	hr8_vs_unstim
chr2	228272000	228344000	18	2.79029	2.64802	22.9942	1.82e-06	0.0276621	228276000	chr2	228348000	4000	hr8_vs_unstim
chr2	228276000	228324000	12	2.42111	3.28521	34.3551	1.7e-08	0.00160347	228280000	chr2	228328000	4000	hr8_vs_unstim
chr2	228276000	228328000	13	2.12253	3.43129	29.3724	1.59e-07	0.00655221	228280000	chr2	228332000	4000	hr8_vs_unstim
chr2	228276000	228336000	15	3.25134	2.86514	31.9042	2e-08	0.00179831	228280000	chr2	228340000	4000	hr8_vs_unstim
chr2	228276000	228340000	16	2.97348	3.2965	37.5693	1.18e-09	0.000260733	228280000	chr2	228344000	4000	hr8_vs_unstim
chr2	228280000	228296000	4	1.56837	3.12159	25.5416	1.62e-06	0.0262394	228284000	chr2	228300000	4000	hr8_vs_unstim
chr2	228280000	228312000	8	1.95042	3.04356	26.2538	6.02e-07	0.0148993	228284000	chr2	228316000	4000	hr8_vs_unstim
chr2	228280000	228320000	10	2.46208	3.17008	34.3058	1.74e-08	0.00162177	228284000	chr2	228324000	4000	hr8_vs_unstim
chr2	228280000	228324000	11	2.10702	3.31514	27.5377	3.67e-07	0.0109077	228284000	chr2	228328000	4000	hr8_vs_unstim
chr2	228280000	228328000	12	2.01531	3.35753	28.304	2.58e-07	0.00872638	228284000	chr2	228332000	4000	hr8_vs_unstim
chr2	228280000	228332000	13	2.31337	3.09557	28.9434	1.93e-07	0.00732175	228284000	chr2	228336000	4000	hr8_vs_unstim
chr2	228288000	228308000	5	2.00351	2.48996	26.573	1.05e-06	0.0204853	228292000	chr2	228312000	4000	hr8_vs_unstim
chr2	230868000	231032000	41	3.08522	3.68121	23.2115	1.54e-06	0.0254996	230872000	chr2	231036000	4000	hr8_vs_unstim
chr2	230872000	230932000	15	2.28948	2.86612	21.887	3.2e-06	0.0366643	230876000	chr2	230936000	4000	hr8_vs_unstim
chr2	231084000	231280000	49	-2.42239	4.43981	22.3222	3.7e-06	0.0393967	231088000	chr2	231284000	4000	hr8_vs_unstim
chr2	231756000	231848000	23	1.97429	3.83876	23.0796	1.59e-06	0.026	231760000	chr2	231852000	4000	hr8_vs_unstim
chr2	231756000	231852000	24	2.25315	4.02395	28.8654	8.05e-08	0.00443562	231760000	chr2	231856000	4000	hr8_vs_unstim
chr2	231760000	231852000	23	2.14861	4.42181	34.8604	3.74e-09	0.000642609	231764000	chr2	231856000	4000	hr8_vs_unstim
chr2	231760000	231856000	24	1.81763	4.18837	21.5185	3.58e-06	0.0388406	231764000	chr2	231860000	4000	hr8_vs_unstim
chr2	231760000	231860000	25	3.15315	3.73789	39.8218	2.98e-10	9.88e-05	231764000	chr2	231864000	4000	hr8_vs_unstim
chr2	231764000	231848000	21	1.92616	4.89733	35.1436	3.23e-09	0.000576362	231768000	chr2	231852000	4000	hr8_vs_unstim
chr2	231764000	231852000	22	2.35838	4.93312	47.05	7.62e-12	6.59e-06	231768000	chr2	231856000	4000	hr8_vs_unstim
chr2	231764000	231856000	23	1.98166	4.48994	29.1541	6.94e-08	0.00402233	231768000	chr2	231860000	4000	hr8_vs_unstim
chr2	231764000	231860000	24	2.4615	3.94856	29.9269	4.67e-08	0.00307727	231768000	chr2	231864000	4000	hr8_vs_unstim
chr2	231768000	231848000	20	2.60239	4.497	53.1094	5.53e-13	1.06e-06	231772000	chr2	231852000	4000	hr8_vs_unstim
chr2	231768000	231852000	21	2.06147	4.63427	32.4029	1.31e-08	0.00132874	231772000	chr2	231856000	4000	hr8_vs_unstim
chr2	233672000	234136000	116	-5.37847	5.18972	21.5283	4.97e-06	0.0459625	233676000	chr2	234140000	4000	hr8_vs_unstim
chr2	235052000	235224000	43	-4.88193	3.3448	34.0903	5.94e-09	0.000882566	235056000	chr2	235228000	4000	hr8_vs_unstim
chr2	238512000	238600000	22	-2.5481	3.06343	27.9202	1.31e-07	0.00587243	238516000	chr2	238604000	4000	hr8_vs_unstim
chr2	238580000	238600000	5	-1.41956	3.43763	31.7398	1.24e-07	0.00570156	238584000	chr2	238604000	4000	hr8_vs_unstim
chr2	240156000	240176000	5	-1.44602	2.98606	25.3824	1.73e-06	0.0270948	240160000	chr2	240180000	4000	hr8_vs_unstim
chr2	240188000	240216000	7	-1.58666	3.38146	24.8142	1.18e-06	0.021981	240192000	chr2	240220000	4000	hr8_vs_unstim
chr2	241944000	242096000	38	-3.97903	2.84544	22.8285	1.87e-06	0.0281052	241948000	chr2	242100000	4000	hr8_vs_unstim
chr2	241948000	242076000	32	-3.8246	2.53731	24.9131	8.87e-07	0.0186192	241952000	chr2	242080000	4000	hr8_vs_unstim
chr2	241972000	242084000	28	-4.0691	2.58875	24.3773	1.15e-06	0.0215927	241976000	chr2	242088000	4000	hr8_vs_unstim
chr2	242016000	242092000	19	-1.78913	3.37007	21.7923	3.36e-06	0.0377103	242020000	chr2	242096000	4000	hr8_vs_unstim
chr2	242024000	242060000	9	-2.01183	2.37141	22.5434	3.48e-06	0.0383239	242028000	chr2	242064000	4000	hr8_vs_unstim
chr2	242032000	242044000	3	-1.35197	3.24812	24.3	2.75e-06	0.0339532	242036000	chr2	242048000	4000	hr8_vs_unstim
chr20	3776000	3792000	4	-1.29109	5.57481	28.2137	1.05e-06	0.0204879	3780000	chr20	3796000	4000	hr8_vs_unstim
chr20	5548000	5584000	9	-1.80843	4.92499	27.8961	9.23e-07	0.0190902	5552000	chr20	5588000	4000	hr8_vs_unstim
chr20	17660000	18268000	152	-5.91745	8.55008	23.1013	5.12e-06	0.0465946	17664000	chr20	18272000	4000	hr8_vs_unstim
chr20	18448000	18484000	9	-2.16292	4.99321	41.9788	5.22e-09	0.000799857	18452000	chr20	18488000	4000	hr8_vs_unstim
chr20	31112000	31128000	4	-1.24358	5.70114	29.0073	7.78e-07	0.0173067	31116000	chr20	31132000	4000	hr8_vs_unstim
chr20	35556000	35596000	10	-1.80678	4.96071	21.4302	5.53e-06	0.0482082	35560000	chr20	35600000	4000	hr8_vs_unstim
chr20	35560000	35572000	3	-1.68899	5.03568	33.8268	1.34e-07	0.00596015	35564000	chr20	35576000	4000	hr8_vs_unstim
chr20	35572000	35596000	6	-1.83537	4.99357	30.6573	3.17e-07	0.00995919	35576000	chr20	35600000	4000	hr8_vs_unstim
chr20	35584000	35596000	3	-1.10727	5.96123	26.5942	1.94e-06	0.0285419	35588000	chr20	35600000	4000	hr8_vs_unstim
chr20	42400000	42700000	75	7.04983	6.16678	37.0439	1.22e-08	0.00129815	42404000	chr20	42704000	4000	hr8_vs_unstim
chr20	42608000	42672000	16	-2.55978	4.50324	23.7113	1.35e-06	0.0235321	42612000	chr20	42676000	4000	hr8_vs_unstim
chr20	42672000	42708000	9	-1.82594	4.56365	24.4031	3.71e-06	0.0395	42676000	chr20	42712000	4000	hr8_vs_unstim
chr20	42672000	42712000	10	-1.86262	4.96416	24.7414	1.12e-06	0.0213167	42676000	chr20	42716000	4000	hr8_vs_unstim
chr20	42676000	42720000	11	-2.64293	4.29428	30.9371	6.04e-08	0.00363035	42680000	chr20	42724000	4000	hr8_vs_unstim
chr20	42680000	42712000	8	-2.0362	5.60597	55.1191	6.99e-11	3.35e-05	42684000	chr20	42716000	4000	hr8_vs_unstim
chr20	42680000	42716000	9	-1.47276	5.2506	23.7813	4.78e-06	0.0452355	42684000	chr20	42720000	4000	hr8_vs_unstim
chr20	42684000	42696000	3	-2.02317	5.64629	72.4695	1.15e-12	1.4e-06	42688000	chr20	42700000	4000	hr8_vs_unstim
chr20	42684000	42704000	5	-1.48737	5.05539	32.7781	1.96e-07	0.00736652	42688000	chr20	42708000	4000	hr8_vs_unstim
chr20	42684000	42708000	6	-1.57767	5.98813	39.308	1.33e-08	0.0013317	42688000	chr20	42712000	4000	hr8_vs_unstim
chr20	42684000	42712000	7	-1.59808	5.56456	32.5552	1.55e-07	0.00645005	42688000	chr20	42716000	4000	hr8_vs_unstim
chr20	42688000	42704000	4	-1.73481	4.67075	32.66	2.04e-07	0.00751709	42692000	chr20	42708000	4000	hr8_vs_unstim
chr20	42688000	42708000	5	-1.82934	4.74552	36.6059	5.07e-08	0.00329487	42692000	chr20	42712000	4000	hr8_vs_unstim
chr20	42692000	42708000	4	-1.61179	5.25991	39.82	1.7e-08	0.00160347	42696000	chr20	42712000	4000	hr8_vs_unstim
chr20	42696000	42708000	3	-1.61861	5.37168	42.3031	7.44e-09	0.000983018	42700000	chr20	42712000	4000	hr8_vs_unstim
chr20	43240000	43276000	9	-1.95503	4.66361	26.4633	1.62e-06	0.0262662	43244000	chr20	43280000	4000	hr8_vs_unstim
chr20	43592000	43608000	4	-1.25243	5.32213	23.9116	5.5e-06	0.0479961	43596000	chr20	43612000	4000	hr8_vs_unstim
chr20	43596000	43608000	3	-1.51799	5.67011	41.2705	1.05e-08	0.00119233	43600000	chr20	43612000	4000	hr8_vs_unstim
chr20	48248000	48364000	29	3.33343	4.92355	24.4916	2.22e-06	0.0304315	48252000	chr20	48368000	4000	hr8_vs_unstim
chr20	48252000	48440000	47	3.26712	5.86485	25.5324	6.84e-07	0.0159884	48256000	chr20	48444000	4000	hr8_vs_unstim
chr20	49280000	49364000	21	2.49774	5.35879	25.1942	1.8e-06	0.027588	49284000	chr20	49368000	4000	hr8_vs_unstim
chr20	50928000	51052000	31	-2.58352	5.33381	26.2347	1.04e-06	0.020374	50932000	chr20	51056000	4000	hr8_vs_unstim
chr20	57660000	57980000	80	-2.85303	7.22603	22.6119	5.7e-06	0.0488294	57664000	chr20	57984000	4000	hr8_vs_unstim
chr20	61528000	61560000	8	-2.02525	4.63452	28.701	6.74e-07	0.0158653	61532000	chr20	61564000	4000	hr8_vs_unstim
chr20	61540000	61580000	10	-2.32253	4.76421	24.3104	1.38e-06	0.0238415	61544000	chr20	61584000	4000	hr8_vs_unstim
chr20	62228000	62280000	13	-2.46343	4.398	25.8504	6.61e-07	0.0156985	62232000	chr20	62284000	4000	hr8_vs_unstim
chr20	62244000	62276000	8	-1.80424	5.01616	28.3193	7.82e-07	0.0173193	62248000	chr20	62280000	4000	hr8_vs_unstim
chr20	62244000	62280000	9	-1.83021	4.67466	25.5448	2.34e-06	0.0312634	62248000	chr20	62284000	4000	hr8_vs_unstim
chr20	62256000	62268000	3	-1.20069	5.50865	25.2983	3.19e-06	0.0366246	62260000	chr20	62272000	4000	hr8_vs_unstim
chr21	16432000	16884000	113	-3.86602	8.00493	23.0703	1.58e-06	0.0258152	16436000	chr21	16888000	4000	hr8_vs_unstim
chr21	26760000	26952000	48	3.97488	6.52855	28.7936	1.64e-06	0.0263766	26764000	chr21	26956000	4000	hr8_vs_unstim
chr21	26764000	26940000	44	3.48328	6.27376	24.3701	4.05e-06	0.0413269	26768000	chr21	26944000	4000	hr8_vs_unstim
chr21	26764000	26952000	47	4.56045	7.04549	48.2201	4.58e-09	0.000724718	26768000	chr21	26956000	4000	hr8_vs_unstim
chr21	26768000	26964000	49	4.75755	6.32808	35.2467	2.01e-07	0.00747159	26772000	chr21	26968000	4000	hr8_vs_unstim
chr21	26768000	26976000	52	3.91542	6.08021	27.5985	2.47e-06	0.0322083	26772000	chr21	26980000	4000	hr8_vs_unstim
chr21	26776000	26952000	44	3.59058	6.67594	36.2628	4.53e-08	0.00305009	26780000	chr21	26956000	4000	hr8_vs_unstim
chr21	26776000	26956000	45	4.29946	6.61018	34.9699	2.19e-07	0.00796156	26780000	chr21	26960000	4000	hr8_vs_unstim
chr21	26776000	26960000	46	4.13904	6.30499	27.0787	2.96e-06	0.0353232	26780000	chr21	26964000	4000	hr8_vs_unstim
chr21	26780000	26952000	43	2.81568	6.44968	24.4423	3.93e-06	0.040855	26784000	chr21	26956000	4000	hr8_vs_unstim
chr21	26784000	26948000	41	3.2769	6.48464	27.8292	1.04e-06	0.020374	26788000	chr21	26952000	4000	hr8_vs_unstim
chr21	26784000	26952000	42	3.68037	6.40407	34.9055	7.37e-08	0.0042143	26788000	chr21	26956000	4000	hr8_vs_unstim
chr21	26784000	26964000	45	4.2793	6.27226	29.8992	1.13e-06	0.0214083	26788000	chr21	26968000	4000	hr8_vs_unstim
chr21	26788000	26940000	38	3.07918	6.508	24.9866	3.16e-06	0.0364864	26792000	chr21	26944000	4000	hr8_vs_unstim
chr21	26788000	26948000	40	3.12778	7.07403	37.6587	2.76e-08	0.00224962	26792000	chr21	26952000	4000	hr8_vs_unstim
chr21	26788000	26952000	41	2.92521	6.81894	34.5945	8.25e-08	0.00449342	26792000	chr21	26956000	4000	hr8_vs_unstim
chr21	26792000	26828000	9	1.99197	5.41782	22.4511	3.91e-06	0.0407238	26796000	chr21	26832000	4000	hr8_vs_unstim
chr21	26792000	26872000	20	4.26661	5.36981	46.6323	1.03e-10	4.6e-05	26796000	chr21	26876000	4000	hr8_vs_unstim
chr21	26792000	26876000	21	3.53209	6.13101	44.7527	3.98e-11	2.18e-05	26796000	chr21	26880000	4000	hr8_vs_unstim
chr21	26792000	26880000	22	2.898	5.53294	22.5639	2.37e-06	0.0314487	26796000	chr21	26884000	4000	hr8_vs_unstim
chr21	26792000	26884000	23	3.13605	5.5396	23.9976	1.15e-06	0.0215399	26796000	chr21	26888000	4000	hr8_vs_unstim
chr21	26792000	26924000	33	3.21376	5.89792	24.1594	2.26e-06	0.0307409	26796000	chr21	26928000	4000	hr8_vs_unstim
chr21	26792000	26932000	35	2.69229	6.59589	30.7441	1.26e-07	0.00574367	26796000	chr21	26936000	4000	hr8_vs_unstim
chr21	26792000	26936000	36	4.65306	7.02177	62.221	1.09e-11	7.95e-06	26796000	chr21	26940000	4000	hr8_vs_unstim
chr21	26792000	26940000	37	4.24355	6.89673	57.5002	4.38e-11	2.31e-05	26796000	chr21	26944000	4000	hr8_vs_unstim
chr21	26792000	26944000	38	3.75853	6.39221	31.6782	2.41e-07	0.00838592	26796000	chr21	26948000	4000	hr8_vs_unstim
chr21	26792000	26948000	39	4.7937	6.95986	70.2903	1.12e-12	1.4e-06	26796000	chr21	26952000	4000	hr8_vs_unstim
chr21	26792000	26952000	40	3.1259	6.81636	36.2645	4.52e-08	0.00305009	26796000	chr21	26956000	4000	hr8_vs_unstim
chr21	26792000	26956000	41	3.24146	6.31117	26.5568	1.7e-06	0.0268422	26796000	chr21	26960000	4000	hr8_vs_unstim
chr21	26796000	26876000	20	2.55129	5.54822	22.515	3.99e-06	0.0410915	26800000	chr21	26880000	4000	hr8_vs_unstim
chr21	26796000	26884000	22	3.16766	5.31124	21.2003	4.75e-06	0.0450658	26800000	chr21	26888000	4000	hr8_vs_unstim
chr21	26796000	26928000	33	3.73692	5.84211	26.5513	7.81e-07	0.0173067	26800000	chr21	26932000	4000	hr8_vs_unstim
chr21	26796000	26932000	34	4.24505	6.66429	62.9225	4.21e-13	9.42e-07	26800000	chr21	26936000	4000	hr8_vs_unstim
chr21	26796000	26936000	35	3.65399	6.22539	36.5739	1.08e-08	0.00120826	26800000	chr21	26940000	4000	hr8_vs_unstim
chr21	26796000	26944000	37	3.57526	6.21828	27.3005	1.27e-06	0.0228216	26800000	chr21	26948000	4000	hr8_vs_unstim
chr21	26796000	26948000	38	4.0949	7.04998	60.4421	1.83e-11	1.14e-05	26800000	chr21	26952000	4000	hr8_vs_unstim
chr21	26796000	26952000	39	3.77177	6.54274	36.8675	3.65e-08	0.00266762	26800000	chr21	26956000	4000	hr8_vs_unstim
chr21	26800000	26824000	6	2.35542	5.55843	33.0649	3.03e-08	0.00237403	26804000	chr21	26828000	4000	hr8_vs_unstim
chr21	26800000	26828000	7	1.9573	5.56733	23.6773	2.2e-06	0.0303282	26804000	chr21	26832000	4000	hr8_vs_unstim
chr21	26800000	26920000	30	3.38869	5.69088	25.3965	1.3e-06	0.0230298	26804000	chr21	26924000	4000	hr8_vs_unstim
chr21	26800000	26924000	31	4.33957	5.79232	36.1571	1.28e-08	0.00131616	26804000	chr21	26928000	4000	hr8_vs_unstim
chr21	26800000	26932000	33	3.05681	6.37974	34.0303	3.12e-08	0.0024299	26804000	chr21	26936000	4000	hr8_vs_unstim
chr21	26800000	26936000	34	3.68138	6.2556	37.2991	8.01e-09	0.00101862	26804000	chr21	26940000	4000	hr8_vs_unstim
chr21	26800000	26940000	35	3.08418	6.06458	22.7223	4.32e-06	0.042719	26804000	chr21	26944000	4000	hr8_vs_unstim
chr21	26800000	26948000	37	3.37756	6.62205	37.775	2.65e-08	0.002199	26804000	chr21	26952000	4000	hr8_vs_unstim
chr21	26800000	26952000	38	4.97898	6.47066	55.3218	8.47e-11	3.92e-05	26804000	chr21	26956000	4000	hr8_vs_unstim
chr21	26804000	26824000	5	1.97661	5.63507	34.468	3.54e-08	0.00264374	26808000	chr21	26828000	4000	hr8_vs_unstim
chr21	26804000	26928000	31	2.92657	6.08184	24.8892	1.63e-06	0.026314	26808000	chr21	26932000	4000	hr8_vs_unstim
chr21	26804000	26932000	32	3.68368	6.52575	44.0351	5.26e-10	0.000151132	26808000	chr21	26936000	4000	hr8_vs_unstim
chr21	26804000	26940000	34	3.26524	6.30401	30.4855	1.41e-07	0.00610265	26808000	chr21	26944000	4000	hr8_vs_unstim
chr21	26804000	26948000	36	3.78115	6.76343	47.1282	1.12e-09	0.000252234	26808000	chr21	26952000	4000	hr8_vs_unstim
chr21	26804000	26956000	38	3.15664	6.25936	27.1861	1.33e-06	0.0233156	26808000	chr21	26960000	4000	hr8_vs_unstim
chr21	26808000	26948000	35	3.10637	5.97564	28.8802	2.82e-07	0.0092409	26812000	chr21	26952000	4000	hr8_vs_unstim
chr21	26808000	26952000	36	3.9372	6.27756	39.4241	1.49e-08	0.00144607	26812000	chr21	26956000	4000	hr8_vs_unstim
chr21	26812000	26876000	16	2.40154	5.7243	22.2976	4.42e-06	0.0431514	26816000	chr21	26880000	4000	hr8_vs_unstim
chr21	26812000	26936000	31	3.17277	6.19093	26.9591	6.52e-07	0.0156096	26816000	chr21	26940000	4000	hr8_vs_unstim
chr21	26812000	26940000	32	2.81508	6.37756	29.8245	1.87e-07	0.0071859	26816000	chr21	26944000	4000	hr8_vs_unstim
chr21	26812000	26944000	33	2.99385	5.74619	23.0238	3.77e-06	0.0398678	26816000	chr21	26948000	4000	hr8_vs_unstim
chr21	26812000	26952000	35	2.94599	6.20238	31.3726	9.63e-08	0.00490323	26816000	chr21	26956000	4000	hr8_vs_unstim
chr21	26816000	26940000	31	3.30156	5.87093	30.1396	1.63e-07	0.00665978	26820000	chr21	26944000	4000	hr8_vs_unstim
chr21	26820000	26876000	14	2.47351	5.692	27.7152	1.41e-07	0.00610265	26824000	chr21	26880000	4000	hr8_vs_unstim
chr21	26820000	26928000	27	2.87801	5.58113	24.9949	6.94e-07	0.0161456	26824000	chr21	26932000	4000	hr8_vs_unstim
chr21	26820000	26932000	28	2.26645	6.84416	25.1772	1.43e-06	0.0244642	26824000	chr21	26936000	4000	hr8_vs_unstim
chr21	26820000	26936000	29	2.25711	6.63124	22.4233	4.95e-06	0.0458706	26824000	chr21	26940000	4000	hr8_vs_unstim
chr21	26820000	26948000	32	3.17473	6.59977	41.4766	1.46e-09	0.000318863	26824000	chr21	26952000	4000	hr8_vs_unstim
chr21	26824000	26872000	12	2.20328	5.59463	21.8257	2.99e-06	0.0354658	26828000	chr21	26876000	4000	hr8_vs_unstim
chr21	26824000	26920000	24	3.18262	5.49575	26.9803	2.56e-07	0.00867957	26828000	chr21	26924000	4000	hr8_vs_unstim
chr21	26824000	26928000	26	3.11368	5.54889	25.4165	5.61e-07	0.0142813	26828000	chr21	26932000	4000	hr8_vs_unstim
chr21	26824000	26932000	27	2.56011	6.45017	31.1019	3.26e-08	0.00250558	26828000	chr21	26936000	4000	hr8_vs_unstim
chr21	26824000	26936000	28	2.63407	6.64938	28.8573	2.85e-07	0.00930925	26828000	chr21	26940000	4000	hr8_vs_unstim
chr21	26824000	26940000	29	3.23258	6.54829	36.3052	1.21e-08	0.00129138	26828000	chr21	26944000	4000	hr8_vs_unstim
chr21	26824000	26944000	30	3.08388	5.74143	25.5469	1.22e-06	0.0223529	26828000	chr21	26948000	4000	hr8_vs_unstim
chr21	26824000	26948000	31	2.93043	6.3264	30.5983	1.34e-07	0.00596015	26828000	chr21	26952000	4000	hr8_vs_unstim
chr21	26828000	26860000	8	1.81308	5.83727	25.2013	1.08e-06	0.0209646	26832000	chr21	26864000	4000	hr8_vs_unstim
chr21	26828000	26864000	9	2.17799	5.16983	24.2349	1.69e-06	0.0267634	26832000	chr21	26868000	4000	hr8_vs_unstim
chr21	26828000	26868000	10	2.18879	5.95769	28.2281	1.08e-07	0.00526863	26832000	chr21	26872000	4000	hr8_vs_unstim
chr21	26828000	26872000	11	2.36871	6.06632	33.7136	6.4e-09	0.000899626	26832000	chr21	26876000	4000	hr8_vs_unstim
chr21	26828000	26876000	12	2.05744	6.08599	25.2865	4.95e-07	0.0132091	26832000	chr21	26880000	4000	hr8_vs_unstim
chr21	26828000	26880000	13	2.64101	5.80981	35.465	2.6e-09	0.00049895	26832000	chr21	26884000	4000	hr8_vs_unstim
chr21	26828000	26884000	14	2.75697	5.22656	24.79	6.4e-07	0.0154693	26832000	chr21	26888000	4000	hr8_vs_unstim
chr21	26828000	26924000	24	2.92792	6.14888	30.3215	4.81e-08	0.00314525	26832000	chr21	26928000	4000	hr8_vs_unstim
chr21	26828000	26928000	25	3.83084	6.06793	44.0887	5.49e-11	2.78e-05	26832000	chr21	26932000	4000	hr8_vs_unstim
chr21	26828000	26932000	26	4.59667	7.0489	116.506	1.37e-25	3.67e-18	26832000	chr21	26936000	4000	hr8_vs_unstim
chr21	26828000	26936000	27	3.60571	6.67835	59.3944	3.49e-14	1.54e-07	26832000	chr21	26940000	4000	hr8_vs_unstim
chr21	26828000	26940000	28	4.61813	6.71904	65.208	1.86e-13	5.55e-07	26832000	chr21	26944000	4000	hr8_vs_unstim
chr21	26828000	26944000	29	2.81657	6.32909	27.9765	4.18e-07	0.011881	26832000	chr21	26948000	4000	hr8_vs_unstim
chr21	26828000	26948000	30	2.51406	6.71546	31.2104	1.03e-07	0.00510957	26832000	chr21	26952000	4000	hr8_vs_unstim
chr21	26832000	26856000	6	2.01637	6.22246	35.5267	1.02e-08	0.00117538	26836000	chr21	26860000	4000	hr8_vs_unstim
chr21	26832000	26860000	7	1.9412	5.93738	30.4916	9.6e-08	0.00490323	26836000	chr21	26864000	4000	hr8_vs_unstim
chr21	26832000	26864000	8	1.97494	5.52398	24.1265	1.78e-06	0.0274992	26836000	chr21	26868000	4000	hr8_vs_unstim
chr21	26832000	26868000	9	1.84697	5.66822	22.7825	3.35e-06	0.0376704	26836000	chr21	26872000	4000	hr8_vs_unstim
chr21	26832000	26872000	10	3.02465	6.23709	51.8084	6.15e-13	1.1e-06	26836000	chr21	26876000	4000	hr8_vs_unstim
chr21	26832000	26876000	11	2.72974	6.0667	39.3717	3.52e-10	0.000112266	26836000	chr21	26880000	4000	hr8_vs_unstim
chr21	26832000	26880000	12	3.61414	5.52138	55.0397	1.19e-13	3.99e-07	26836000	chr21	26884000	4000	hr8_vs_unstim
chr21	26832000	26924000	23	2.91681	5.84898	27.1079	2.4e-07	0.00838544	26836000	chr21	26928000	4000	hr8_vs_unstim
chr21	26832000	26928000	24	4.22956	6.16749	54.001	4.58e-13	9.46e-07	26836000	chr21	26932000	4000	hr8_vs_unstim
chr21	26832000	26932000	25	3.89337	6.72342	75.8763	1.48e-17	1.99e-10	26836000	chr21	26936000	4000	hr8_vs_unstim
chr21	26832000	26936000	26	3.49433	6.65759	59.0993	4.01e-14	1.54e-07	26836000	chr21	26940000	4000	hr8_vs_unstim
chr21	26832000	26940000	27	4.96839	6.32023	73.9222	3.69e-17	3.3e-10	26836000	chr21	26944000	4000	hr8_vs_unstim
chr21	26832000	26944000	28	2.86899	6.22108	26.6666	7.42e-07	0.0168809	26836000	chr21	26948000	4000	hr8_vs_unstim
chr21	26832000	26948000	29	3.56861	6.45397	44.4186	4.52e-10	0.000133232	26836000	chr21	26952000	4000	hr8_vs_unstim
chr21	26836000	26856000	5	1.70069	5.9575	33.8458	4.55e-08	0.00305009	26840000	chr21	26860000	4000	hr8_vs_unstim
chr21	26836000	26876000	10	2.10283	6.07541	26.1652	3.14e-07	0.00995919	26840000	chr21	26880000	4000	hr8_vs_unstim
chr21	26836000	26928000	23	3.13228	5.81628	34.4439	6.21e-09	0.000891453	26840000	chr21	26932000	4000	hr8_vs_unstim
chr21	26836000	26932000	24	2.71356	6.57767	38.8361	7.15e-10	0.000190344	26840000	chr21	26936000	4000	hr8_vs_unstim
chr21	26836000	26936000	25	3.74878	6.31128	50.1883	2.86e-12	2.82e-06	26840000	chr21	26940000	4000	hr8_vs_unstim
chr21	26836000	26940000	26	3.70528	5.98441	40.2373	3.6e-10	0.000113507	26840000	chr21	26944000	4000	hr8_vs_unstim
chr21	26836000	26948000	28	2.95433	6.07203	28.9664	2.71e-07	0.00906787	26840000	chr21	26952000	4000	hr8_vs_unstim
chr21	26840000	26876000	9	2.07578	5.62912	26.0198	7.4e-07	0.0168486	26844000	chr21	26880000	4000	hr8_vs_unstim
chr21	26840000	26928000	22	3.01802	5.77575	28.1968	1.39e-07	0.00607936	26844000	chr21	26932000	4000	hr8_vs_unstim
chr21	26840000	26932000	23	2.41781	6.18469	22.0427	3.09e-06	0.0362117	26844000	chr21	26936000	4000	hr8_vs_unstim
chr21	26840000	26936000	24	3.88429	5.89692	42.5516	1.16e-10	5e-05	26844000	chr21	26940000	4000	hr8_vs_unstim
chr21	26840000	26940000	25	2.44796	5.97015	23.5512	1.44e-06	0.0245102	26844000	chr21	26944000	4000	hr8_vs_unstim
chr21	26844000	26932000	22	2.43673	6.22398	26.4225	3.38e-07	0.0103787	26848000	chr21	26936000	4000	hr8_vs_unstim
chr21	26844000	26936000	23	2.63627	5.90925	23.9924	1.15e-06	0.0215813	26848000	chr21	26940000	4000	hr8_vs_unstim
chr21	26844000	26948000	26	2.92724	5.71354	24.4531	9.12e-07	0.0189396	26848000	chr21	26952000	4000	hr8_vs_unstim
chr21	26848000	26932000	21	2.93201	5.9522	27.4506	2.02e-07	0.00748045	26852000	chr21	26936000	4000	hr8_vs_unstim
chr21	26848000	26936000	22	3.8508	5.79752	38.6261	7.92e-10	0.000204337	26852000	chr21	26940000	4000	hr8_vs_unstim
chr21	26848000	26940000	23	3.34245	5.85531	32.5195	1.61e-08	0.00154524	26852000	chr21	26944000	4000	hr8_vs_unstim
chr21	26852000	26924000	18	2.73452	5.39289	23.5159	2.5e-06	0.0324913	26856000	chr21	26928000	4000	hr8_vs_unstim
chr21	26852000	26932000	20	2.24069	5.9753	23.2791	2.79e-06	0.034264	26856000	chr21	26936000	4000	hr8_vs_unstim
chr21	26852000	26936000	21	2.87948	6.05479	31.4003	2.81e-08	0.00226376	26856000	chr21	26940000	4000	hr8_vs_unstim
chr21	26852000	26948000	24	3.70819	5.57151	31.9128	2.18e-08	0.00191578	26856000	chr21	26952000	4000	hr8_vs_unstim
chr21	26856000	26928000	18	3.13071	5.6312	38.766	2.81e-09	0.000519848	26860000	chr21	26932000	4000	hr8_vs_unstim
chr21	26856000	26932000	19	2.85696	6.17309	37.7359	4.37e-09	0.000722913	26860000	chr21	26936000	4000	hr8_vs_unstim
chr21	26856000	26936000	20	2.79277	5.83994	32.9078	3.58e-08	0.0026615	26860000	chr21	26940000	4000	hr8_vs_unstim
chr21	26856000	26940000	21	3.08958	6.03683	35.8484	3.11e-09	0.000559231	26860000	chr21	26944000	4000	hr8_vs_unstim
chr21	26856000	26944000	22	3.20967	5.26231	21.9735	3.2e-06	0.0366643	26860000	chr21	26948000	4000	hr8_vs_unstim
chr21	26856000	26948000	23	4.08914	5.7422	41.5931	1.85e-10	6.81e-05	26860000	chr21	26952000	4000	hr8_vs_unstim
chr21	26860000	26924000	16	2.57523	5.8764	28.9522	2.09e-07	0.00763618	26864000	chr21	26928000	4000	hr8_vs_unstim
chr21	26860000	26928000	17	3.18154	5.72466	39.2888	2.25e-09	0.000443181	26864000	chr21	26932000	4000	hr8_vs_unstim
chr21	26860000	26932000	18	3.36911	6.38756	58.1857	9.83e-13	1.35e-06	26864000	chr21	26936000	4000	hr8_vs_unstim
chr21	26860000	26936000	19	3.35233	5.85279	43.1454	4.39e-10	0.000130917	26864000	chr21	26940000	4000	hr8_vs_unstim
chr21	26860000	26940000	20	2.75637	5.7091	28.3739	2.71e-07	0.00905604	26864000	chr21	26944000	4000	hr8_vs_unstim
chr21	26860000	26948000	22	3.11071	5.78205	33.7414	8.8e-09	0.00109249	26864000	chr21	26952000	4000	hr8_vs_unstim
chr21	26864000	26932000	17	3.67217	5.93264	55.0218	3.43e-12	3.18e-06	26868000	chr21	26936000	4000	hr8_vs_unstim
chr21	26864000	26936000	18	3.03866	5.65148	26.1685	7.38e-07	0.01684	26868000	chr21	26940000	4000	hr8_vs_unstim
chr21	26864000	26940000	19	2.46168	5.57373	22.5992	3.84e-06	0.0402639	26868000	chr21	26944000	4000	hr8_vs_unstim
chr21	26872000	26928000	14	2.65365	5.35414	28.0342	1.19e-07	0.00560434	26876000	chr21	26932000	4000	hr8_vs_unstim
chr21	26872000	26932000	15	2.88194	6.45469	47.643	6.79e-11	3.31e-05	26876000	chr21	26936000	4000	hr8_vs_unstim
chr21	26872000	26936000	16	3.01623	5.98866	35.5508	1.13e-08	0.00124824	26876000	chr21	26940000	4000	hr8_vs_unstim
chr21	26872000	26940000	17	2.44431	5.8882	26.5783	6.12e-07	0.0151086	26876000	chr21	26944000	4000	hr8_vs_unstim
chr21	26876000	26928000	13	2.82135	5.88731	37.8574	7.64e-10	0.000198856	26880000	chr21	26932000	4000	hr8_vs_unstim
chr21	26876000	26932000	14	3.36502	6.29393	64.204	1.13e-15	7.59e-09	26880000	chr21	26936000	4000	hr8_vs_unstim
chr21	26876000	26936000	15	3.22508	6.26478	45.6811	1.53e-10	6.11e-05	26880000	chr21	26940000	4000	hr8_vs_unstim
chr21	26876000	26940000	16	2.74471	5.98393	33.7878	2.43e-08	0.00207089	26880000	chr21	26944000	4000	hr8_vs_unstim
chr21	26876000	26944000	17	3.78575	5.12932	33.133	3.24e-08	0.00249992	26880000	chr21	26948000	4000	hr8_vs_unstim
chr21	26880000	26924000	11	2.4194	5.28393	21.4071	3.72e-06	0.0395144	26884000	chr21	26928000	4000	hr8_vs_unstim
chr21	26880000	26928000	12	3.09041	5.29541	32.5049	1.19e-08	0.00128346	26884000	chr21	26932000	4000	hr8_vs_unstim
chr21	26880000	26932000	13	2.81447	6.06355	46.2827	1.03e-11	7.95e-06	26884000	chr21	26936000	4000	hr8_vs_unstim
chr21	26880000	26936000	14	2.4773	5.58587	26.102	3.24e-07	0.0101408	26884000	chr21	26940000	4000	hr8_vs_unstim
chr21	26884000	26916000	8	2.18535	5.50216	25.3946	9.88e-07	0.0199003	26888000	chr21	26920000	4000	hr8_vs_unstim
chr21	26884000	26924000	10	1.99543	5.82178	21.3882	3.75e-06	0.039795	26888000	chr21	26928000	4000	hr8_vs_unstim
chr21	26884000	26928000	11	3.12702	5.72389	45.9687	1.21e-11	8.3e-06	26888000	chr21	26932000	4000	hr8_vs_unstim
chr21	26884000	26932000	12	3.17118	6.15411	52.6564	4e-13	9.42e-07	26888000	chr21	26936000	4000	hr8_vs_unstim
chr21	26884000	26940000	14	3.80687	5.21268	41.0896	1.46e-10	5.93e-05	26888000	chr21	26944000	4000	hr8_vs_unstim
chr21	26888000	26912000	6	1.86305	5.52972	22.3473	4.11e-06	0.0416598	26892000	chr21	26916000	4000	hr8_vs_unstim
chr21	26888000	26916000	7	1.79871	6.0617	27.2001	4.3e-07	0.0121183	26892000	chr21	26920000	4000	hr8_vs_unstim
chr21	26888000	26924000	9	2.26855	5.6151	31.3682	6.47e-08	0.00379732	26892000	chr21	26928000	4000	hr8_vs_unstim
chr21	26888000	26928000	10	3.32352	5.78174	46.6995	8.31e-12	6.93e-06	26892000	chr21	26932000	4000	hr8_vs_unstim
chr21	26888000	26932000	11	2.0649	6.20527	27.0467	1.99e-07	0.00743248	26892000	chr21	26936000	4000	hr8_vs_unstim
chr21	26892000	26924000	8	1.95155	5.89179	26.6017	5.66e-07	0.0143567	26896000	chr21	26928000	4000	hr8_vs_unstim
chr21	26892000	26928000	9	2.4708	5.32296	28.9681	1.91e-07	0.0072891	26896000	chr21	26932000	4000	hr8_vs_unstim
chr21	26896000	26916000	5	1.37769	5.96335	23.573	3.46e-06	0.0382129	26900000	chr21	26920000	4000	hr8_vs_unstim
chr21	26896000	26924000	7	1.79493	5.89492	23.2408	2.7e-06	0.0336107	26900000	chr21	26928000	4000	hr8_vs_unstim
chr21	26904000	26928000	6	2.03536	5.56227	24.7287	1.35e-06	0.0234821	26908000	chr21	26932000	4000	hr8_vs_unstim
chr21	26908000	26920000	3	1.28962	6.31985	23.3263	3.85e-06	0.0403537	26912000	chr21	26924000	4000	hr8_vs_unstim
chr21	27252000	28092000	210	-4.26221	11.2873	26.6241	1.67e-06	0.0265691	27256000	chr21	28096000	4000	hr8_vs_unstim
chr21	30848000	31224000	94	6.25798	7.62409	23.4298	1.77e-06	0.027406	30852000	chr21	31228000	4000	hr8_vs_unstim
chr21	36400000	36416000	4	-1.4542	6.44808	36.6733	1.46e-08	0.00142493	36404000	chr21	36420000	4000	hr8_vs_unstim
chr21	36416000	36724000	77	3.9748	7.0152	22.6197	1.98e-06	0.0289124	36420000	chr21	36728000	4000	hr8_vs_unstim
chr21	37952000	38296000	86	-2.5377	8.2605	23.1863	1.98e-06	0.0289053	37956000	chr21	38300000	4000	hr8_vs_unstim
chr21	37956000	38296000	85	-2.07756	8.50859	21.6079	4.34e-06	0.0427866	37960000	chr21	38300000	4000	hr8_vs_unstim
chr21	37956000	38300000	86	-2.25712	8.66345	30.8813	4.58e-08	0.00305309	37960000	chr21	38304000	4000	hr8_vs_unstim
chr21	43428000	43476000	12	-1.74525	6.06651	23.776	1.08e-06	0.0209737	43432000	chr21	43480000	4000	hr8_vs_unstim
chr21	43428000	43480000	13	-1.52053	6.50772	22.1312	2.55e-06	0.0327519	43432000	chr21	43484000	4000	hr8_vs_unstim
chr21	43428000	43484000	14	-1.71269	6.08856	23.3596	1.35e-06	0.0234812	43432000	chr21	43488000	4000	hr8_vs_unstim
chr21	43432000	43484000	13	-1.65547	6.12966	21.2328	4.07e-06	0.04142	43436000	chr21	43488000	4000	hr8_vs_unstim
chr21	44072000	44240000	42	-2.09456	7.08952	24.778	3.44e-06	0.0380732	44076000	chr21	44244000	4000	hr8_vs_unstim
chr21	44732000	44848000	29	-2.63822	5.8804	23.276	3.36e-06	0.0377194	44736000	chr21	44852000	4000	hr8_vs_unstim
chr21	44776000	44848000	18	-2.25503	5.69493	24.4291	1.64e-06	0.0263601	44780000	chr21	44852000	4000	hr8_vs_unstim
chr21	44780000	44824000	11	-2.0496	5.84761	26.5762	2.54e-07	0.00867486	44784000	chr21	44828000	4000	hr8_vs_unstim
chr21	44784000	44800000	4	-1.52689	5.89678	26.0898	1.16e-06	0.0216675	44788000	chr21	44804000	4000	hr8_vs_unstim
chr21	44784000	44832000	12	-1.66138	6.08359	20.8374	5e-06	0.0461365	44788000	chr21	44836000	4000	hr8_vs_unstim
chr21	44832000	44844000	3	-1.52998	6.47514	39.7028	4.43e-09	0.000722913	44836000	chr21	44848000	4000	hr8_vs_unstim
chr21	46332000	46344000	3	-1.29636	6.64088	33.2879	5.71e-08	0.00355368	46336000	chr21	46348000	4000	hr8_vs_unstim
chr21	47744000	47872000	32	-3.3529	5.5981	28.5386	3.27e-07	0.0101965	47748000	chr21	47876000	4000	hr8_vs_unstim
chr21	47868000	48076000	52	-3.03696	6.70437	25.4842	5.18e-06	0.0468171	47872000	chr21	48080000	4000	hr8_vs_unstim
chr21	47880000	47968000	22	-2.92803	5.7029	29.233	8.27e-08	0.00449342	47884000	chr21	47972000	4000	hr8_vs_unstim
chr21	47880000	48064000	46	-2.68282	6.91683	27.0409	3e-06	0.0355055	47884000	chr21	48068000	4000	hr8_vs_unstim
chr21	47920000	48056000	34	-2.31823	6.45408	26.1762	9.21e-07	0.0190742	47924000	chr21	48060000	4000	hr8_vs_unstim
chr21	47920000	48060000	35	-2.10196	6.42444	22.7753	4.22e-06	0.0422142	47924000	chr21	48064000	4000	hr8_vs_unstim
chr21	47924000	48072000	37	-2.88458	6.18933	23.441	5.89e-06	0.0495939	47928000	chr21	48076000	4000	hr8_vs_unstim
chr21	47968000	48044000	19	-1.83449	6.32305	24.5776	1.53e-06	0.0254229	47972000	chr21	48048000	4000	hr8_vs_unstim
chr21	47968000	48052000	21	-2.36188	6.95179	47.4868	1.06e-11	7.95e-06	47972000	chr21	48056000	4000	hr8_vs_unstim
chr21	47968000	48056000	22	-2.04089	6.81497	34.0217	7.66e-09	0.00100185	47972000	chr21	48060000	4000	hr8_vs_unstim
chr21	47972000	48052000	20	-1.91645	6.54745	32.7256	3.88e-08	0.00278369	47976000	chr21	48056000	4000	hr8_vs_unstim
chr21	47972000	48056000	21	-2.3389	6.66278	40.2902	3.5e-10	0.000112266	47976000	chr21	48060000	4000	hr8_vs_unstim
chr21	47972000	48064000	23	-2.87678	5.68902	27.1106	2.39e-07	0.00838485	47976000	chr21	48068000	4000	hr8_vs_unstim
chr21	47976000	48052000	19	-1.89472	6.78813	32.994	3.45e-08	0.00259069	47980000	chr21	48056000	4000	hr8_vs_unstim
chr21	47976000	48056000	20	-2.10681	6.54695	38.4075	3.28e-09	0.000578274	47980000	chr21	48060000	4000	hr8_vs_unstim
chr21	47980000	48044000	16	-1.75028	6.28195	22.8032	3.49e-06	0.0383866	47984000	chr21	48048000	4000	hr8_vs_unstim
chr21	47980000	48048000	17	-2.01951	6.03828	27.9386	3.3e-07	0.0102203	47984000	chr21	48052000	4000	hr8_vs_unstim
chr21	47980000	48056000	19	-1.69973	6.2778	22.2414	4.53e-06	0.0438467	47984000	chr21	48060000	4000	hr8_vs_unstim
chr21	47988000	48048000	15	-2.35609	6.01892	31.8378	5.75e-08	0.00355368	47992000	chr21	48052000	4000	hr8_vs_unstim
chr21	47988000	48052000	16	-2.20657	6.26495	33.4246	2.85e-08	0.00229096	47992000	chr21	48056000	4000	hr8_vs_unstim
chr21	47988000	48064000	19	-2.60557	5.35604	23.8391	2.15e-06	0.0299197	47992000	chr21	48068000	4000	hr8_vs_unstim
chr21	47992000	48008000	4	-1.61382	5.59599	27.6596	5.93e-07	0.0148071	47996000	chr21	48012000	4000	hr8_vs_unstim
chr21	47992000	48036000	11	-2.04028	5.99162	28.0326	1.19e-07	0.00560434	47996000	chr21	48040000	4000	hr8_vs_unstim
chr21	48020000	48048000	7	-1.70272	5.74626	21.8295	5.25e-06	0.0470961	48024000	chr21	48052000	4000	hr8_vs_unstim
chr22	19472000	19620000	37	-2.20647	6.58953	23.8619	1.31e-06	0.0231016	19476000	chr22	19624000	4000	hr8_vs_unstim
chr22	19476000	19616000	35	-2.61929	5.96034	29.3705	5.99e-08	0.00361046	19480000	chr22	19620000	4000	hr8_vs_unstim
chr22	19480000	19592000	28	-2.19449	6.043	21.7342	3.13e-06	0.0363705	19484000	chr22	19596000	4000	hr8_vs_unstim
chr22	19480000	19612000	33	-2.2029	6.59928	30.8936	2.73e-08	0.00224064	19484000	chr22	19616000	4000	hr8_vs_unstim
chr22	19480000	19616000	34	-1.96394	6.68033	27.3306	1.72e-07	0.00684621	19484000	chr22	19620000	4000	hr8_vs_unstim
chr22	19480000	19620000	35	-2.07006	6.24093	23.9124	1.01e-06	0.0201039	19484000	chr22	19624000	4000	hr8_vs_unstim
chr22	19484000	19616000	33	-2.17102	6.21857	26.0027	3.41e-07	0.0104082	19488000	chr22	19620000	4000	hr8_vs_unstim
chr22	19484000	19620000	34	-2.33477	5.7656	22.0644	2.64e-06	0.0332414	19488000	chr22	19624000	4000	hr8_vs_unstim
chr22	19488000	19620000	33	-2.28848	6.212	27.2896	1.75e-07	0.00691079	19492000	chr22	19624000	4000	hr8_vs_unstim
chr22	20860000	20892000	8	-1.80599	5.60611	26.4831	9.53e-07	0.0194193	20864000	chr22	20896000	4000	hr8_vs_unstim
chr22	20900000	20920000	5	-1.45335	5.67098	23.1257	5.63e-06	0.0484787	20904000	chr22	20924000	4000	hr8_vs_unstim
chr22	25452000	25568000	29	-2.41157	6.3805	32.7528	1.05e-08	0.00119233	25456000	chr22	25572000	4000	hr8_vs_unstim
chr22	29192000	29224000	8	-1.76948	5.79333	29.9126	2.22e-07	0.00803678	29196000	chr22	29228000	4000	hr8_vs_unstim
chr22	29196000	29216000	5	-1.55929	6.05376	37.309	2.15e-08	0.00190634	29200000	chr22	29220000	4000	hr8_vs_unstim
chr22	29200000	29220000	5	-1.79091	5.36185	32.4857	1.32e-07	0.00592405	29204000	chr22	29224000	4000	hr8_vs_unstim
chr22	29204000	29216000	3	-1.51874	6.21437	37.3701	2.11e-08	0.0018762	29208000	chr22	29220000	4000	hr8_vs_unstim
chr22	30700000	30720000	5	-1.61521	5.79796	31.9147	1.65e-07	0.00667774	30704000	chr22	30724000	4000	hr8_vs_unstim
chr22	36748000	36768000	5	-1.32675	5.93018	23.7078	4.41e-06	0.0431446	36752000	chr22	36772000	4000	hr8_vs_unstim
chr22	37632000	37704000	18	-2.31734	5.76281	28.6792	3.39e-07	0.0103787	37636000	chr22	37708000	4000	hr8_vs_unstim
chr22	37868000	37900000	8	-1.81919	5.71453	28.8022	3.54e-07	0.0106324	37872000	chr22	37904000	4000	hr8_vs_unstim
chr22	37876000	37888000	3	-1.34449	6.04637	26.2396	1.56e-06	0.0256722	37880000	chr22	37892000	4000	hr8_vs_unstim
chr22	39132000	39152000	5	-1.3076	6.02442	23.5484	4.72e-06	0.0449125	39136000	chr22	39156000	4000	hr8_vs_unstim
chr22	39272000	39324000	13	1.98404	5.92273	26.5925	8.08e-07	0.017546	39276000	chr22	39328000	4000	hr8_vs_unstim
chr22	39572000	39676000	26	2.20119	6.28205	24.9954	1.28e-06	0.0228696	39576000	chr22	39680000	4000	hr8_vs_unstim
chr22	40296000	40308000	3	-1.50502	5.64113	26.7245	1.28e-06	0.0228707	40300000	chr22	40312000	4000	hr8_vs_unstim
chr22	40296000	40316000	5	-1.60536	5.57808	28.7071	5.79e-07	0.0145734	40300000	chr22	40320000	4000	hr8_vs_unstim
chr22	40640000	40764000	31	-2.36624	5.70006	21.1667	4.21e-06	0.0422095	40644000	chr22	40768000	4000	hr8_vs_unstim
chr22	41720000	41736000	4	1.3937	6.07719	26.0908	1.66e-06	0.0264724	41724000	chr22	41740000	4000	hr8_vs_unstim
chr22	41836000	41864000	7	-1.76483	5.50547	23.98	2.83e-06	0.0344549	41840000	chr22	41868000	4000	hr8_vs_unstim
chr22	43220000	43428000	52	4.02985	5.80051	24.7577	6.51e-07	0.0156026	43224000	chr22	43432000	4000	hr8_vs_unstim
chr22	44852000	44884000	8	1.84858	5.76284	25.4278	1.5e-06	0.0250844	44856000	chr22	44888000	4000	hr8_vs_unstim
chr22	47156000	47192000	9	-1.82897	6.12561	34.6136	3.19e-08	0.0024733	47160000	chr22	47196000	4000	hr8_vs_unstim
chr22	47160000	47180000	5	-1.31222	6.03351	24.9952	2.59e-06	0.0330112	47164000	chr22	47184000	4000	hr8_vs_unstim
chr22	50356000	50452000	24	1.86663	6.54821	23.9361	2.08e-06	0.0296151	50360000	chr22	50456000	4000	hr8_vs_unstim
chr3	4764000	4888000	31	2.40961	4.10215	21.7184	4.74e-06	0.0450658	4768000	chr3	4892000	4000	hr8_vs_unstim
chr3	13380000	13484000	26	-3.18828	2.66333	20.7939	5.83e-06	0.0494092	13384000	chr3	13488000	4000	hr8_vs_unstim
chr3	13700000	13920000	55	-1.79502	6.49991	25.3875	5.51e-07	0.0141673	13704000	chr3	13924000	4000	hr8_vs_unstim
chr3	13708000	13864000	39	-2.65036	4.05206	22.7639	4.37e-06	0.0429685	13712000	chr3	13868000	4000	hr8_vs_unstim
chr3	13868000	13920000	13	-2.29796	3.18903	26.2367	5.02e-07	0.0133053	13872000	chr3	13924000	4000	hr8_vs_unstim
chr3	13940000	14504000	141	-3.52135	7.27983	28.2467	1.75e-06	0.0273315	13944000	chr3	14508000	4000	hr8_vs_unstim
chr3	14184000	14216000	8	-1.43979	3.64861	21.3022	5.92e-06	0.0497293	14188000	chr3	14220000	4000	hr8_vs_unstim
chr3	14824000	14956000	33	-3.08094	3.77358	29.4696	1.17e-07	0.00555103	14828000	chr3	14960000	4000	hr8_vs_unstim
chr3	14828000	14956000	32	-2.49786	4.24721	27.9553	2.39e-07	0.00838187	14832000	chr3	14960000	4000	hr8_vs_unstim
chr3	16340000	16352000	3	-1.24252	3.90705	25.2721	3.21e-06	0.0366854	16344000	chr3	16356000	4000	hr8_vs_unstim
chr3	18412000	18432000	5	-2.44587	2.088	28.6333	8.88e-07	0.0186235	18416000	chr3	18436000	4000	hr8_vs_unstim
chr3	18444000	18480000	9	-1.86696	3.246	26.1936	5.67e-07	0.0143579	18448000	chr3	18484000	4000	hr8_vs_unstim
chr3	18448000	18468000	5	-1.72313	3.13606	30.6314	4.23e-07	0.011989	18452000	chr3	18472000	4000	hr8_vs_unstim
chr3	18468000	18480000	3	-1.29852	3.73898	24.6611	4.07e-06	0.04142	18472000	chr3	18484000	4000	hr8_vs_unstim
chr3	18468000	18692000	56	3.66043	4.4202	22.0115	3.06e-06	0.0359936	18472000	chr3	18696000	4000	hr8_vs_unstim
chr3	18744000	18796000	13	-2.29422	2.71439	23.6281	1.77e-06	0.027406	18748000	chr3	18800000	4000	hr8_vs_unstim
chr3	30644000	30700000	14	-2.07573	3.09597	23.6373	1.77e-06	0.027388	30648000	chr3	30704000	4000	hr8_vs_unstim
chr3	32216000	32436000	55	-2.51066	5.04225	22.3056	2.64e-06	0.0332289	32220000	chr3	32440000	4000	hr8_vs_unstim
chr3	42540000	42596000	14	-1.67656	3.83	22.6148	2.91e-06	0.0349835	42544000	chr3	42600000	4000	hr8_vs_unstim
chr3	43200000	43236000	9	-1.86775	3.28335	27.9057	2.52e-07	0.00864688	43204000	chr3	43240000	4000	hr8_vs_unstim
chr3	43204000	43232000	7	-1.59596	3.73353	25.9394	6.4e-07	0.0154693	43208000	chr3	43236000	4000	hr8_vs_unstim
chr3	43208000	43232000	6	-1.80348	3.0855	22.9062	2.73e-06	0.0338469	43212000	chr3	43236000	4000	hr8_vs_unstim
chr3	43352000	43548000	49	-3.87158	3.80381	23.1384	3.11e-06	0.0362911	43356000	chr3	43552000	4000	hr8_vs_unstim
chr3	44376000	44552000	44	-2.55742	4.16599	24.5964	1.93e-06	0.0285205	44380000	chr3	44556000	4000	hr8_vs_unstim
chr3	46536000	46568000	8	-2.01813	3.14911	27.0914	3.71e-07	0.0109713	46540000	chr3	46572000	4000	hr8_vs_unstim
chr3	46544000	46560000	4	-1.61508	3.21363	23.9652	5.35e-06	0.0475455	46548000	chr3	46564000	4000	hr8_vs_unstim
chr3	46580000	46596000	4	-1.43662	3.60281	25.3002	3.17e-06	0.0365102	46584000	chr3	46600000	4000	hr8_vs_unstim
chr3	52288000	52300000	3	-1.19833	4.24193	25.906	2.51e-06	0.0325015	52292000	chr3	52304000	4000	hr8_vs_unstim
chr3	56584000	56672000	22	-2.74735	3.23127	23.5208	1.46e-06	0.024647	56588000	chr3	56676000	4000	hr8_vs_unstim
chr3	56592000	56644000	13	-1.73834	3.50471	21.701	4.55e-06	0.0438822	56596000	chr3	56648000	4000	hr8_vs_unstim
chr3	56592000	56652000	15	-1.99022	3.61417	22.2836	4.05e-06	0.0413269	56596000	chr3	56656000	4000	hr8_vs_unstim
chr3	56628000	56648000	5	-1.88433	2.70368	26.4105	2.06e-06	0.0295395	56632000	chr3	56652000	4000	hr8_vs_unstim
chr3	56728000	56836000	27	-2.24756	3.75207	23.1394	1.77e-06	0.027395	56732000	chr3	56840000	4000	hr8_vs_unstim
chr3	57588000	57736000	37	-2.71208	3.97447	22.6445	4.61e-06	0.0443462	57592000	chr3	57740000	4000	hr8_vs_unstim
chr3	58320000	58484000	41	-2.7715	4.16031	29.0034	2.8e-07	0.00922436	58324000	chr3	58488000	4000	hr8_vs_unstim
chr3	69164000	69464000	75	3.97876	4.64774	23.7491	2.45e-06	0.0320371	69168000	chr3	69468000	4000	hr8_vs_unstim
chr3	69200000	69468000	67	2.41517	5.79135	22.8844	3.65e-06	0.0391131	69204000	chr3	69472000	4000	hr8_vs_unstim
chr3	69204000	69464000	65	2.8033	5.11455	23.8823	1.18e-06	0.0219659	69208000	chr3	69468000	4000	hr8_vs_unstim
chr3	69356000	69444000	22	2.51194	3.65446	21.695	3.68e-06	0.0393494	69360000	chr3	69448000	4000	hr8_vs_unstim
chr3	69356000	69456000	25	2.60532	3.52818	24.0577	1.11e-06	0.0212148	69360000	chr3	69460000	4000	hr8_vs_unstim
chr3	69356000	69460000	26	2.7736	3.421	21.7444	3.59e-06	0.0389004	69360000	chr3	69464000	4000	hr8_vs_unstim
chr3	69356000	69468000	28	2.80065	4.40519	31.92	3.72e-08	0.00268923	69360000	chr3	69472000	4000	hr8_vs_unstim
chr3	69364000	69456000	23	2.91509	3.50168	26.3493	3.5e-07	0.0105348	69368000	chr3	69460000	4000	hr8_vs_unstim
chr3	69364000	69460000	24	3.16564	3.09934	23.7134	1.32e-06	0.023234	69368000	chr3	69464000	4000	hr8_vs_unstim
chr3	71412000	71448000	9	-1.81944	3.05819	23.1978	2.37e-06	0.0314487	71416000	chr3	71452000	4000	hr8_vs_unstim
chr3	71416000	71456000	10	-1.90388	3.60272	26.2049	5.1e-07	0.0133782	71420000	chr3	71460000	4000	hr8_vs_unstim
chr3	71424000	71444000	5	-1.87677	2.70642	29.4521	6.54e-07	0.0156348	71428000	chr3	71448000	4000	hr8_vs_unstim
chr3	71432000	71444000	3	-1.67422	3.14165	29.293	6.94e-07	0.0161456	71436000	chr3	71448000	4000	hr8_vs_unstim
chr3	71440000	71452000	3	-1.50514	3.31419	26.397	2.08e-06	0.0295552	71444000	chr3	71456000	4000	hr8_vs_unstim
chr3	71492000	71504000	3	-1.42534	3.75385	29.1344	7.36e-07	0.0168343	71496000	chr3	71508000	4000	hr8_vs_unstim
chr3	71504000	71528000	6	-1.34603	4.30297	24.2007	1.47e-06	0.0246861	71508000	chr3	71532000	4000	hr8_vs_unstim
chr3	71504000	71532000	7	-1.48437	3.69349	22.5215	3.28e-06	0.0372525	71508000	chr3	71536000	4000	hr8_vs_unstim
chr3	72788000	72868000	20	-2.32138	3.34261	25.3924	9.35e-07	0.019223	72792000	chr3	72872000	4000	hr8_vs_unstim
chr3	101052000	101264000	53	-5.8923	3.57493	30.9979	8.93e-08	0.00469653	101056000	chr3	101268000	4000	hr8_vs_unstim
chr3	105548000	105728000	45	3.22602	4.50133	26.1304	7.89e-07	0.0174045	105552000	chr3	105732000	4000	hr8_vs_unstim
chr3	105576000	105892000	79	3.18663	5.55669	25.209	3.51e-06	0.0384707	105580000	chr3	105896000	4000	hr8_vs_unstim
chr3	105584000	105732000	37	2.84339	4.18135	23.6815	2.9e-06	0.0349071	105588000	chr3	105736000	4000	hr8_vs_unstim
chr3	105728000	105888000	40	2.55534	4.4083	22.4974	4.93e-06	0.0458512	105732000	chr3	105892000	4000	hr8_vs_unstim
chr3	105728000	105896000	42	3.90423	3.99324	35.0283	2.19e-08	0.00192354	105732000	chr3	105900000	4000	hr8_vs_unstim
chr3	105728000	105924000	49	2.32453	4.90025	22.1999	4.8e-06	0.0452979	105732000	chr3	105928000	4000	hr8_vs_unstim
chr3	105732000	105888000	39	2.90619	4.51305	33.8029	3.65e-08	0.00266762	105736000	chr3	105892000	4000	hr8_vs_unstim
chr3	105732000	105924000	48	2.53798	4.88287	22.2114	4.78e-06	0.0452021	105736000	chr3	105928000	4000	hr8_vs_unstim
chr3	105892000	106324000	108	3.90987	6.13971	22.047	5.31e-06	0.0473451	105896000	chr3	106328000	4000	hr8_vs_unstim
chr3	107396000	107444000	12	-2.4473	2.63401	23.5938	1.8e-06	0.0276127	107400000	chr3	107448000	4000	hr8_vs_unstim
chr3	111432000	111776000	86	4.61898	5.32582	29.6124	6.71e-07	0.0158413	111436000	chr3	111780000	4000	hr8_vs_unstim
chr3	119176000	119216000	10	-2.25651	2.68399	21.6282	4.71e-06	0.0448869	119180000	chr3	119220000	4000	hr8_vs_unstim
chr3	127840000	128040000	50	-3.11467	4.22527	22.6395	3.91e-06	0.0407315	127844000	chr3	128044000	4000	hr8_vs_unstim
chr3	128744000	128832000	22	-2.4907	3.59357	24.8124	7.59e-07	0.0171374	128748000	chr3	128836000	4000	hr8_vs_unstim
chr3	136304000	136748000	111	4.59747	5.7389	22.6377	4.04e-06	0.0413167	136308000	chr3	136752000	4000	hr8_vs_unstim
chr3	141216000	141240000	6	-1.50041	3.62753	21.6554	4.99e-06	0.0460654	141220000	chr3	141244000	4000	hr8_vs_unstim
chr3	141232000	141244000	3	-1.35644	3.55378	25.3233	3.14e-06	0.0363954	141236000	chr3	141248000	4000	hr8_vs_unstim
chr3	151924000	151952000	7	-1.4793	3.7447	21.5663	5.21e-06	0.0469471	151928000	chr3	151956000	4000	hr8_vs_unstim
chr3	151924000	151956000	8	-1.52268	3.52284	21.8354	4.58e-06	0.0440684	151928000	chr3	151960000	4000	hr8_vs_unstim
chr3	151928000	151940000	3	-1.38024	3.55115	25.0723	3.47e-06	0.0382513	151932000	chr3	151944000	4000	hr8_vs_unstim
chr3	151932000	151944000	3	-1.63763	3.55187	37.0544	4.3e-08	0.00297178	151936000	chr3	151948000	4000	hr8_vs_unstim
chr3	152884000	152940000	14	-2.05232	3.03445	22.9215	2.5e-06	0.0324913	152888000	chr3	152944000	4000	hr8_vs_unstim
chr3	152884000	153004000	30	-2.9119	3.68514	29.6772	1.06e-07	0.00519122	152888000	chr3	153008000	4000	hr8_vs_unstim
chr3	171176000	171208000	8	-1.68583	3.10371	21.69	4.91e-06	0.0457564	171180000	chr3	171212000	4000	hr8_vs_unstim
chr3	182904000	182992000	22	2.59699	3.43013	21.849	3.41e-06	0.0379577	182908000	chr3	182996000	4000	hr8_vs_unstim
chr3	182980000	183092000	28	2.22232	4.32096	23.763	1.76e-06	0.027388	182984000	chr3	183096000	4000	hr8_vs_unstim
chr3	182992000	183096000	26	3.43737	3.41228	30.8616	3.66e-08	0.00266762	182996000	chr3	183100000	4000	hr8_vs_unstim
chr3	183000000	183096000	24	3.42312	3.12142	26.409	3.4e-07	0.0103868	183004000	chr3	183100000	4000	hr8_vs_unstim
chr3	184288000	184456000	42	-2.98376	3.93301	24.2226	2.27e-06	0.0307409	184292000	chr3	184460000	4000	hr8_vs_unstim
chr3	185628000	185644000	4	-1.46541	3.35292	26.4635	2.02e-06	0.0291965	185632000	chr3	185648000	4000	hr8_vs_unstim
chr3	187892000	188308000	104	6.25014	4.9926	22.8394	4.24e-06	0.0423416	187896000	chr3	188312000	4000	hr8_vs_unstim
chr3	188668000	188856000	47	2.87736	4.58583	24.533	1.64e-06	0.0263278	188672000	chr3	188860000	4000	hr8_vs_unstim
chr3	195248000	195284000	9	-1.88589	2.88587	21.4301	5.57e-06	0.0482627	195252000	chr3	195288000	4000	hr8_vs_unstim
chr3	195252000	195264000	3	-1.50646	3.3651	25.6819	2.74e-06	0.03389	195256000	chr3	195268000	4000	hr8_vs_unstim
chr3	195816000	195832000	4	1.37965	3.88438	24.3871	4.53e-06	0.0438467	195820000	chr3	195836000	4000	hr8_vs_unstim
chr3	195864000	195904000	10	1.76617	3.77307	21.983	3.96e-06	0.0409138	195868000	chr3	195908000	4000	hr8_vs_unstim
chr4	360000	468000	27	-2.32509	3.71113	23.0439	2.62e-06	0.0331824	364000	chr4	472000	4000	hr8_vs_unstim
chr4	2244000	2352000	27	-2.18747	4.05163	24.3772	1.39e-06	0.0239358	2248000	chr4	2356000	4000	hr8_vs_unstim
chr4	2244000	2356000	28	-2.32196	4.60606	23.3988	1.6e-06	0.0260397	2248000	chr4	2360000	4000	hr8_vs_unstim
chr4	2280000	2356000	19	-1.9559	3.77286	22.3125	3.38e-06	0.0378872	2284000	chr4	2360000	4000	hr8_vs_unstim
chr4	2280000	2364000	21	-2.56357	3.49702	22.4278	3.52e-06	0.0385098	2284000	chr4	2368000	4000	hr8_vs_unstim
chr4	2304000	2352000	12	-1.98354	3.42668	22.5949	2.88e-06	0.0348628	2308000	chr4	2356000	4000	hr8_vs_unstim
chr4	3156000	3320000	41	-4.44595	3.65401	23.6157	1.56e-06	0.0256722	3160000	chr4	3324000	4000	hr8_vs_unstim
chr4	3200000	3296000	24	-2.73481	3.3196	25.3223	8.84e-07	0.0185933	3204000	chr4	3300000	4000	hr8_vs_unstim
chr4	3200000	3352000	38	-3.84494	4.52367	33.1685	1.45e-08	0.00142113	3204000	chr4	3356000	4000	hr8_vs_unstim
chr4	3280000	3476000	49	-6.21211	4.2503	26.0848	3.33e-07	0.0102482	3284000	chr4	3480000	4000	hr8_vs_unstim
chr4	6676000	6696000	5	-1.41007	3.96565	32.8471	2.5e-07	0.00860274	6680000	chr4	6700000	4000	hr8_vs_unstim
chr4	17580000	17792000	53	-4.15268	4.47513	20.6187	5.67e-06	0.0486558	17584000	chr4	17796000	4000	hr8_vs_unstim
chr4	22408000	22464000	14	2.53015	2.94752	21.9168	4.02e-06	0.0411652	22412000	chr4	22468000	4000	hr8_vs_unstim
chr4	26032000	26328000	74	6.13884	5.24218	23.645	1.92e-06	0.0285205	26036000	chr4	26332000	4000	hr8_vs_unstim
chr4	26056000	26324000	67	3.51281	6.32769	25.0299	9.93e-07	0.0199576	26060000	chr4	26328000	4000	hr8_vs_unstim
chr4	26068000	26324000	64	3.12926	6.23921	34.1314	2.66e-08	0.00219929	26072000	chr4	26328000	4000	hr8_vs_unstim
chr4	26080000	26324000	61	2.41808	6.89496	35.9156	1.25e-08	0.00131105	26084000	chr4	26328000	4000	hr8_vs_unstim
chr4	26084000	26320000	59	2.71906	6.46074	33.4044	3.63e-08	0.00266762	26088000	chr4	26324000	4000	hr8_vs_unstim
chr4	26092000	26320000	57	3.57677	5.53398	25.7709	1.03e-06	0.0202533	26096000	chr4	26324000	4000	hr8_vs_unstim
chr4	26136000	26324000	47	4.35267	4.89948	30.2177	3.96e-08	0.00279725	26140000	chr4	26328000	4000	hr8_vs_unstim
chr4	26156000	26312000	39	3.20491	4.79709	28.0684	1.73e-07	0.00687595	26160000	chr4	26316000	4000	hr8_vs_unstim
chr4	26864000	26884000	5	-1.38674	3.58491	25.9275	3.02e-06	0.0356735	26868000	chr4	26888000	4000	hr8_vs_unstim
chr4	37684000	37780000	24	-2.78931	3.71849	31.7701	4.35e-08	0.00298245	37688000	chr4	37784000	4000	hr8_vs_unstim
chr4	38064000	38672000	152	2.89252	8.98337	32.2538	1.25e-07	0.00572682	38068000	chr4	38676000	4000	hr8_vs_unstim
chr4	38136000	38672000	134	2.7637	8.49578	23.7213	1.12e-06	0.0213143	38140000	chr4	38676000	4000	hr8_vs_unstim
chr4	38504000	38652000	37	-2.58681	4.9362	22.9144	2.21e-06	0.0304059	38508000	chr4	38656000	4000	hr8_vs_unstim
chr4	38512000	38672000	40	-1.96998	5.50725	24.4629	1.02e-06	0.0202533	38516000	chr4	38676000	4000	hr8_vs_unstim
chr4	38656000	38668000	3	-1.58891	3.70542	34.3112	1.51e-07	0.00633723	38660000	chr4	38672000	4000	hr8_vs_unstim
chr4	40200000	40212000	3	-1.45696	4.22812	37.4228	5.33e-08	0.00339485	40204000	chr4	40216000	4000	hr8_vs_unstim
chr4	40204000	40236000	8	-1.80384	3.43572	25.1623	1.01e-06	0.0201629	40208000	chr4	40240000	4000	hr8_vs_unstim
chr4	40216000	40240000	6	-1.53473	3.70641	24.09	1.68e-06	0.0266316	40220000	chr4	40244000	4000	hr8_vs_unstim
chr4	40280000	40316000	9	-1.9964	2.92531	23.5523	2.17e-06	0.02999	40284000	chr4	40320000	4000	hr8_vs_unstim
chr4	40284000	40308000	6	-1.52217	3.92327	24.8776	1.16e-06	0.0216582	40288000	chr4	40312000	4000	hr8_vs_unstim
chr4	48104000	48148000	11	-2.18274	3.0676	22.3867	3.19e-06	0.036612	48108000	chr4	48152000	4000	hr8_vs_unstim
chr4	69212000	69240000	7	-1.7042	3.37247	23.417	2.31e-06	0.0310644	69216000	chr4	69244000	4000	hr8_vs_unstim
chr4	78740000	78772000	8	-1.52104	3.6916	22.2033	4.12e-06	0.0416972	78744000	chr4	78776000	4000	hr8_vs_unstim
chr4	78740000	78776000	9	-1.565	3.58588	23.0063	2.81e-06	0.0343887	78744000	chr4	78780000	4000	hr8_vs_unstim
chr4	78740000	78784000	11	-2.15954	3.19649	24.2142	1.31e-06	0.0230855	78744000	chr4	78788000	4000	hr8_vs_unstim
chr4	78748000	78772000	6	-1.52089	3.82736	24.7971	1.2e-06	0.0222159	78752000	chr4	78776000	4000	hr8_vs_unstim
chr4	78752000	78768000	4	-1.16646	4.41192	26.2854	2.65e-06	0.0332558	78756000	chr4	78772000	4000	hr8_vs_unstim
chr4	80936000	81104000	42	3.05526	4.54927	20.9934	5.77e-06	0.0491502	80940000	chr4	81108000	4000	hr8_vs_unstim
chr4	83932000	83956000	6	-1.42709	3.90232	21.7292	5.16e-06	0.0467189	83936000	chr4	83960000	4000	hr8_vs_unstim
chr4	99404000	99576000	43	3.4471	4.35342	24.0604	1.25e-06	0.0226656	99408000	chr4	99580000	4000	hr8_vs_unstim
chr4	99404000	99580000	44	3.5096	4.6107	27.7857	1.99e-07	0.00743248	99408000	chr4	99584000	4000	hr8_vs_unstim
chr4	99428000	99568000	35	3.8477	3.73482	26.1287	4.06e-07	0.0116957	99432000	chr4	99572000	4000	hr8_vs_unstim
chr4	99916000	99960000	11	-1.80584	3.44844	21.1318	5.92e-06	0.0497125	99920000	chr4	99964000	4000	hr8_vs_unstim
chr4	108956000	108968000	3	-1.35939	3.80732	27.471	1.71e-06	0.0268804	108960000	chr4	108972000	4000	hr8_vs_unstim
chr4	108976000	109004000	7	-1.61669	3.56039	22.3403	3.86e-06	0.0403566	108980000	chr4	109008000	4000	hr8_vs_unstim
chr4	109036000	109048000	3	-1.49307	3.52905	28.593	1.13e-06	0.0213974	109040000	chr4	109052000	4000	hr8_vs_unstim
chr4	109036000	109052000	4	-1.31892	3.62564	25.4291	3.65e-06	0.0391131	109040000	chr4	109056000	4000	hr8_vs_unstim
chr4	109064000	109076000	3	-1.29551	3.83151	24.7116	4.78e-06	0.0452355	109068000	chr4	109080000	4000	hr8_vs_unstim
chr4	109068000	109080000	3	-1.47799	3.45156	26.2613	2.67e-06	0.0333993	109072000	chr4	109084000	4000	hr8_vs_unstim
chr4	114308000	114680000	93	9.26295	6.32737	27.3464	2.02e-07	0.00748621	114312000	chr4	114684000	4000	hr8_vs_unstim
chr4	114312000	114684000	93	4.04977	6.54265	22.8672	1.96e-06	0.0288129	114316000	chr4	114688000	4000	hr8_vs_unstim
chr4	114316000	114440000	31	3.22151	3.99007	24.0943	1.13e-06	0.0213275	114320000	chr4	114444000	4000	hr8_vs_unstim
chr4	114444000	114680000	59	3.13125	5.57764	22.7615	4.01e-06	0.0410941	114448000	chr4	114684000	4000	hr8_vs_unstim
chr4	122108000	122228000	30	2.46996	4.763	26.4733	3.42e-07	0.0104082	122112000	chr4	122232000	4000	hr8_vs_unstim
chr4	122112000	122220000	27	2.70261	4.0756	23.5747	2.03e-06	0.0292758	122116000	chr4	122224000	4000	hr8_vs_unstim
chr4	123376000	123456000	20	2.43229	3.38648	21.665	4.64e-06	0.0444174	123380000	chr4	123460000	4000	hr8_vs_unstim
chr4	123376000	123460000	21	3.56645	3.91697	36.7386	4.51e-09	0.000723921	123380000	chr4	123464000	4000	hr8_vs_unstim
chr4	123376000	123484000	27	3.19042	3.48044	26.2819	5.62e-07	0.0142834	123380000	chr4	123488000	4000	hr8_vs_unstim
chr4	123376000	123496000	30	3.96444	4.3524	38.3394	9.79e-10	0.000238864	123380000	chr4	123500000	4000	hr8_vs_unstim
chr4	140964000	141140000	44	-3.21406	4.23773	20.9728	5.83e-06	0.0494249	140968000	chr4	141144000	4000	hr8_vs_unstim
chr4	146152000	146356000	51	4.1051	4.50654	21.3653	3.84e-06	0.0403036	146156000	chr4	146360000	4000	hr8_vs_unstim
chr4	146152000	146520000	92	2.57369	7.41665	21.5883	3.77e-06	0.0398995	146156000	chr4	146524000	4000	hr8_vs_unstim
chr4	146156000	146368000	53	4.78563	4.58128	26.5955	2.56e-07	0.00867957	146160000	chr4	146372000	4000	hr8_vs_unstim
chr4	146156000	146400000	61	3.44411	5.37041	24.0498	2.23e-06	0.0305403	146160000	chr4	146404000	4000	hr8_vs_unstim
chr4	146176000	146324000	37	4.0826	3.90089	21.5812	4.3e-06	0.0426556	146180000	chr4	146328000	4000	hr8_vs_unstim
chr4	146212000	146400000	47	3.51693	4.84656	21.8185	3.04e-06	0.0357813	146216000	chr4	146404000	4000	hr8_vs_unstim
chr4	146348000	146484000	34	3.25713	3.5185	21.0001	5.38e-06	0.0476096	146352000	chr4	146488000	4000	hr8_vs_unstim
chr4	153456000	153604000	37	-3.36282	4.29605	24.2718	1.13e-06	0.0213275	153460000	chr4	153608000	4000	hr8_vs_unstim
chr4	164472000	164676000	51	-2.77302	5.18872	20.6659	5.53e-06	0.0482082	164476000	chr4	164680000	4000	hr8_vs_unstim
chr4	185212000	185392000	45	2.82093	5.46818	21.6635	3.29e-06	0.0372635	185216000	chr4	185396000	4000	hr8_vs_unstim
chr4	185236000	185396000	40	3.5577	4.66093	25.9184	4.98e-07	0.0132502	185240000	chr4	185400000	4000	hr8_vs_unstim
chr5	312000	428000	29	2.40093	4.63193	25.7634	1.07e-06	0.0208337	316000	chr5	432000	4000	hr8_vs_unstim
chr5	312000	432000	30	2.80888	4.72211	32.0994	6.73e-08	0.00390989	316000	chr5	436000	4000	hr8_vs_unstim
chr5	312000	436000	31	2.35121	4.86506	25.0615	1.46e-06	0.0246851	316000	chr5	440000	4000	hr8_vs_unstim
chr5	316000	420000	26	2.69915	3.72093	21.9171	3.63e-06	0.0390517	320000	chr5	424000	4000	hr8_vs_unstim
chr5	320000	420000	25	2.37673	4.18616	23.1175	1.99e-06	0.0289801	324000	chr5	424000	4000	hr8_vs_unstim
chr5	320000	432000	28	2.36737	4.59567	22.309	5.08e-06	0.0464517	324000	chr5	436000	4000	hr8_vs_unstim
chr5	320000	436000	29	2.16871	5.07119	25.3676	1.28e-06	0.0228482	324000	chr5	440000	4000	hr8_vs_unstim
chr5	340000	420000	20	2.70389	3.20356	25.0529	1.21e-06	0.022264	344000	chr5	424000	4000	hr8_vs_unstim
chr5	1256000	1316000	15	-2.12324	3.75687	22.385	4.18e-06	0.0419929	1260000	chr5	1320000	4000	hr8_vs_unstim
chr5	31824000	32000000	44	-4.77802	3.33674	22.1546	2.52e-06	0.032551	31828000	chr5	32004000	4000	hr8_vs_unstim
chr5	35832000	35844000	3	-1.26303	3.80552	24.4281	5.86e-06	0.0495144	35836000	chr5	35848000	4000	hr8_vs_unstim
chr5	38940000	39140000	50	-4.63832	3.78729	21.955	4.7e-06	0.0448511	38944000	chr5	39144000	4000	hr8_vs_unstim
chr5	38944000	39096000	38	-3.20324	4.0114	22.4999	2.1e-06	0.0297605	38948000	chr5	39100000	4000	hr8_vs_unstim
chr5	38944000	39116000	43	-3.23032	4.19324	26.287	2.94e-07	0.00956225	38948000	chr5	39120000	4000	hr8_vs_unstim
chr5	38944000	39128000	46	-3.04882	4.55859	22.0249	4.55e-06	0.0438822	38948000	chr5	39132000	4000	hr8_vs_unstim
chr5	38944000	39132000	47	-3.11206	4.54547	22.324	3.94e-06	0.040886	38948000	chr5	39136000	4000	hr8_vs_unstim
chr5	38944000	39136000	48	-4.36619	4.3133	29.4598	1.41e-07	0.00610265	38948000	chr5	39140000	4000	hr8_vs_unstim
chr5	38948000	39100000	38	-4.29975	3.62842	28.0164	1.2e-07	0.00561584	38952000	chr5	39104000	4000	hr8_vs_unstim
chr5	38948000	39112000	41	-3.71469	3.71	22.0255	2.69e-06	0.0335693	38952000	chr5	39116000	4000	hr8_vs_unstim
chr5	38952000	39104000	38	-3.40732	4.01087	25.1617	5.27e-07	0.0137646	38956000	chr5	39108000	4000	hr8_vs_unstim
chr5	38952000	39124000	43	-3.47445	4.02019	26.2746	2.96e-07	0.00960095	38956000	chr5	39128000	4000	hr8_vs_unstim
chr5	38956000	39104000	37	-3.21768	3.99936	21.2486	4.04e-06	0.0412583	38960000	chr5	39108000	4000	hr8_vs_unstim
chr5	38956000	39116000	40	-2.94088	4.27499	25.0583	5.57e-07	0.0142318	38960000	chr5	39120000	4000	hr8_vs_unstim
chr5	38960000	39120000	40	-2.96817	4.83198	35.9693	2.01e-09	0.000402604	38964000	chr5	39124000	4000	hr8_vs_unstim
chr5	38960000	39124000	41	-2.49964	4.61601	23.1574	1.49e-06	0.0249759	38964000	chr5	39128000	4000	hr8_vs_unstim
chr5	38968000	39108000	35	-2.61797	3.8602	23.1847	3.41e-06	0.0379577	38972000	chr5	39112000	4000	hr8_vs_unstim
chr5	39184000	39196000	3	-1.50747	3.90798	34.6164	1.6e-07	0.00657173	39188000	chr5	39200000	4000	hr8_vs_unstim
chr5	39192000	39208000	4	-1.33809	3.80977	24.3827	5.96e-06	0.0498939	39196000	chr5	39212000	4000	hr8_vs_unstim
chr5	39196000	39208000	3	-1.30115	3.83436	24.8827	4.94e-06	0.0458706	39200000	chr5	39212000	4000	hr8_vs_unstim
chr5	40380000	40392000	3	-1.46342	3.55285	26.8682	2.38e-06	0.0314538	40384000	chr5	40396000	4000	hr8_vs_unstim
chr5	58332000	58420000	22	-1.7959	5.14715	30.2447	5.96e-08	0.00360613	58336000	chr5	58424000	4000	hr8_vs_unstim
chr5	67508000	67540000	8	-1.88816	3.24392	24.5477	2.52e-06	0.0326037	67512000	chr5	67544000	4000	hr8_vs_unstim
chr5	67512000	67540000	7	-1.84786	3.30145	23.7756	3.51e-06	0.0384707	67516000	chr5	67544000	4000	hr8_vs_unstim
chr5	67580000	67728000	37	2.51183	5.38905	30.7529	2.93e-08	0.00232777	67584000	chr5	67732000	4000	hr8_vs_unstim
chr5	67580000	67756000	44	1.6441	5.84932	20.8801	4.89e-06	0.0457179	67584000	chr5	67760000	4000	hr8_vs_unstim
chr5	67580000	67772000	48	3.4994	4.97893	32.0114	4.39e-08	0.00300646	67584000	chr5	67776000	4000	hr8_vs_unstim
chr5	67592000	67696000	26	3.25237	3.24384	23.1426	1.97e-06	0.0288568	67596000	chr5	67700000	4000	hr8_vs_unstim
chr5	78996000	79152000	39	-2.3439	4.84362	20.8788	4.89e-06	0.0457179	79000000	chr5	79156000	4000	hr8_vs_unstim
chr5	79468000	79500000	8	-1.76405	3.42236	24.0836	3.08e-06	0.0361202	79472000	chr5	79504000	4000	hr8_vs_unstim
chr5	79548000	79564000	4	-1.512	3.45382	24.6346	5.42e-06	0.0477191	79552000	chr5	79568000	4000	hr8_vs_unstim
chr5	86328000	86540000	53	4.19455	4.22187	23.1406	2.68e-06	0.0334442	86332000	chr5	86544000	4000	hr8_vs_unstim
chr5	95012000	95112000	25	2.24374	3.98696	21.2623	5.04e-06	0.0462651	95016000	chr5	95116000	4000	hr8_vs_unstim
chr5	101900000	102448000	137	8.97959	7.3788	23.833	1.06e-06	0.0206843	101904000	chr5	102452000	4000	hr8_vs_unstim
chr5	118344000	118636000	73	4.49914	5.06498	22.0528	5.07e-06	0.0464	118348000	chr5	118640000	4000	hr8_vs_unstim
chr5	118696000	118708000	3	-1.31402	3.98782	26.2594	2.97e-06	0.0353747	118700000	chr5	118712000	4000	hr8_vs_unstim
chr5	130532000	130716000	46	-2.79377	4.88166	22.679	3.33e-06	0.0375829	130536000	chr5	130720000	4000	hr8_vs_unstim
chr5	130700000	130712000	3	-1.27553	4.10316	28.3878	1.37e-06	0.0237811	130704000	chr5	130716000	4000	hr8_vs_unstim
chr5	131792000	131828000	9	-1.63878	3.71219	24.1462	3e-06	0.0355055	131796000	chr5	131832000	4000	hr8_vs_unstim
chr5	132444000	132524000	20	-2.97563	2.78772	28.4506	2.55e-07	0.00867957	132448000	chr5	132528000	4000	hr8_vs_unstim
chr5	132448000	132552000	26	-3.2043	3.27828	27.6857	2.08e-07	0.00763618	132452000	chr5	132556000	4000	hr8_vs_unstim
chr5	133396000	133408000	3	-1.40942	3.72351	28.3909	1.37e-06	0.0237704	133400000	chr5	133412000	4000	hr8_vs_unstim
chr5	133468000	133480000	3	-1.24271	4.27815	27.7212	1.75e-06	0.0272546	133472000	chr5	133484000	4000	hr8_vs_unstim
chr5	145908000	146556000	162	-5.29151	8.0652	27.6171	2.86e-07	0.00931889	145912000	chr5	146560000	4000	hr8_vs_unstim
chr5	151204000	151520000	79	-2.69641	6.60648	26.5382	2.59e-07	0.00873076	151208000	chr5	151524000	4000	hr8_vs_unstim
chr5	153416000	153824000	102	-3.17028	6.24743	21.6759	5.07e-06	0.0464	153420000	chr5	153828000	4000	hr8_vs_unstim
chr5	156604000	156616000	3	-1.18894	4.20521	26.3017	2.92e-06	0.035135	156608000	chr5	156620000	4000	hr8_vs_unstim
chr5	156608000	156624000	4	-1.31181	3.80808	24.7013	5.29e-06	0.0472259	156612000	chr5	156628000	4000	hr8_vs_unstim
chr5	156636000	156660000	6	-2.16535	3.09592	28.3763	5.05e-07	0.0133254	156640000	chr5	156664000	4000	hr8_vs_unstim
chr5	156648000	156660000	3	-1.33267	3.65969	25.2742	4.27e-06	0.0425022	156652000	chr5	156664000	4000	hr8_vs_unstim
chr5	156648000	156668000	5	-1.44803	3.47244	27.5454	1.86e-06	0.0279962	156652000	chr5	156672000	4000	hr8_vs_unstim
chr5	156648000	156672000	6	-1.79223	3.87474	32.8458	8.2e-08	0.00447999	156652000	chr5	156676000	4000	hr8_vs_unstim
chr5	156752000	157116000	91	4.98278	5.73224	22.4091	3.56e-06	0.0387589	156756000	chr5	157120000	4000	hr8_vs_unstim
chr5	156856000	157148000	73	2.87962	5.83706	23.1536	3.04e-06	0.0357813	156860000	chr5	157152000	4000	hr8_vs_unstim
chr5	156880000	157116000	59	3.30643	5.0077	23.3205	2.34e-06	0.0312114	156884000	chr5	157120000	4000	hr8_vs_unstim
chr5	156900000	157160000	65	2.85317	5.51478	22.5155	3.44e-06	0.0380732	156904000	chr5	157164000	4000	hr8_vs_unstim
chr5	156904000	157080000	44	3.05678	4.44857	25.7385	3.91e-07	0.0113608	156908000	chr5	157084000	4000	hr8_vs_unstim
chr5	156908000	157128000	55	3.78593	5.34012	28.8632	1.72e-07	0.00684694	156912000	chr5	157132000	4000	hr8_vs_unstim
chr5	156912000	157144000	58	3.19024	5.30451	22.8891	2.87e-06	0.0348053	156916000	chr5	157148000	4000	hr8_vs_unstim
chr5	156940000	157144000	51	3.67297	4.46496	21.6702	5.39e-06	0.0476364	156944000	chr5	157148000	4000	hr8_vs_unstim
chr5	156968000	157172000	51	4.70787	4.22503	25.6631	8.17e-07	0.0176825	156972000	chr5	157176000	4000	hr8_vs_unstim
chr5	171600000	171612000	3	-1.032	4.68775	24.5647	5.57e-06	0.0482571	171604000	chr5	171616000	4000	hr8_vs_unstim
chr6	180000	392000	53	3.72747	4.60564	29.5644	9.28e-08	0.00481352	184000	chr6	396000	4000	hr8_vs_unstim
chr6	184000	376000	48	2.96541	4.97021	30.0207	7.45e-08	0.00425177	188000	chr6	380000	4000	hr8_vs_unstim
chr6	184000	396000	53	3.29506	4.95113	35.2981	6.02e-09	0.000884605	188000	chr6	400000	4000	hr8_vs_unstim
chr6	188000	228000	10	2.49884	3.00514	26.326	1.74e-06	0.0272225	192000	chr6	232000	4000	hr8_vs_unstim
chr6	188000	392000	51	2.51704	5.36899	26.4369	4.21e-07	0.0119616	192000	chr6	396000	4000	hr8_vs_unstim
chr6	192000	392000	50	2.30482	5.13173	21.1065	5.78e-06	0.0491604	196000	chr6	396000	4000	hr8_vs_unstim
chr6	224000	388000	41	2.88732	4.31811	26.4842	7.94e-07	0.0174393	228000	chr6	392000	4000	hr8_vs_unstim
chr6	284000	384000	25	2.54633	3.67498	25.2509	1.88e-06	0.0281681	288000	chr6	388000	4000	hr8_vs_unstim
chr6	432000	504000	18	1.97831	3.998	23.5953	3.37e-06	0.0377783	436000	chr6	508000	4000	hr8_vs_unstim
chr6	444000	508000	16	2.04432	4.55961	33.4037	5.3e-08	0.00339305	448000	chr6	512000	4000	hr8_vs_unstim
chr6	504000	548000	11	2.39287	3.99561	39.7745	1.16e-08	0.00126521	508000	chr6	552000	4000	hr8_vs_unstim
chr6	508000	544000	9	1.96817	3.37316	24.5807	3.72e-06	0.0395716	512000	chr6	548000	4000	hr8_vs_unstim
chr6	516000	544000	7	2.1368	3.34141	26.0718	2.06e-06	0.0295395	520000	chr6	548000	4000	hr8_vs_unstim
chr6	3408000	3456000	12	-2.35454	3.59307	35.2242	5.91e-08	0.00360613	3412000	chr6	3460000	4000	hr8_vs_unstim
chr6	5148000	5248000	25	-2.64177	3.2695	22.7081	5.6e-06	0.0483592	5152000	chr6	5252000	4000	hr8_vs_unstim
chr6	6556000	6616000	15	-2.27147	3.75679	29.827	2.33e-07	0.00829272	6560000	chr6	6620000	4000	hr8_vs_unstim
chr6	6560000	6612000	13	-2.341	2.83736	23.3123	5.87e-06	0.049539	6564000	chr6	6616000	4000	hr8_vs_unstim
chr6	6560000	6664000	26	-2.15211	3.85241	23.7402	3.59e-06	0.0389004	6564000	chr6	6668000	4000	hr8_vs_unstim
chr6	6564000	6684000	30	-2.53888	3.80188	23.0378	3.12e-06	0.0363312	6568000	chr6	6688000	4000	hr8_vs_unstim
chr6	6592000	6608000	4	-1.57067	3.84121	37.7843	1.42e-07	0.00611056	6596000	chr6	6612000	4000	hr8_vs_unstim
chr6	6596000	6656000	15	-2.38754	3.53577	30.7292	1.6e-07	0.00656781	6600000	chr6	6660000	4000	hr8_vs_unstim
chr6	6608000	6652000	11	-2.0863	3.83225	33.4248	1.14e-07	0.00547625	6612000	chr6	6656000	4000	hr8_vs_unstim
chr6	6608000	6660000	13	-1.80205	3.67811	24.2343	4.03e-06	0.0412379	6612000	chr6	6664000	4000	hr8_vs_unstim
chr6	6608000	6664000	14	-2.07759	3.41189	25.8874	2.07e-06	0.0295552	6612000	chr6	6668000	4000	hr8_vs_unstim
chr6	6612000	6656000	11	-2.61003	3.76572	46.6917	1.1e-09	0.000249265	6616000	chr6	6660000	4000	hr8_vs_unstim
chr6	6612000	6660000	12	-2.14802	3.08331	24.5543	3.54e-06	0.0386381	6616000	chr6	6664000	4000	hr8_vs_unstim
chr6	6616000	6652000	9	-1.60666	3.95694	26.8791	1.5e-06	0.0250844	6620000	chr6	6656000	4000	hr8_vs_unstim
chr6	6616000	6656000	10	-1.98964	4.15993	32.7059	1.5e-07	0.00629009	6620000	chr6	6660000	4000	hr8_vs_unstim
chr6	6620000	6652000	8	-1.58854	3.78389	24.6195	3.67e-06	0.039238	6624000	chr6	6656000	4000	hr8_vs_unstim
chr6	6620000	6656000	9	-2.26591	3.49286	41.5664	7.14e-09	0.000962016	6624000	chr6	6660000	4000	hr8_vs_unstim
chr6	6624000	6652000	7	-1.88781	3.15582	24.0181	4.67e-06	0.0446105	6628000	chr6	6656000	4000	hr8_vs_unstim
chr6	6628000	6652000	6	-1.78727	3.84444	31.4572	2.62e-07	0.00879648	6632000	chr6	6656000	4000	hr8_vs_unstim
chr6	6632000	6676000	11	-2.06869	3.29531	23.8983	4.62e-06	0.0443531	6636000	chr6	6680000	4000	hr8_vs_unstim
chr6	6916000	7128000	53	3.82824	3.81684	21.4614	4.85e-06	0.0454601	6920000	chr6	7132000	4000	hr8_vs_unstim
chr6	11324000	11364000	10	1.92465	3.62181	23.3128	5.87e-06	0.049539	11328000	chr6	11368000	4000	hr8_vs_unstim
chr6	11368000	11496000	32	2.83411	3.66468	21.8619	5.41e-06	0.0476892	11372000	chr6	11500000	4000	hr8_vs_unstim
chr6	11372000	11492000	30	3.78425	3.50885	27.2523	4.49e-07	0.0124502	11376000	chr6	11496000	4000	hr8_vs_unstim
chr6	13192000	13324000	33	3.37234	3.39119	23.1357	2.98e-06	0.035465	13196000	chr6	13328000	4000	hr8_vs_unstim
chr6	13200000	13320000	30	4.41992	3.22366	27.5664	3.9e-07	0.0113458	13204000	chr6	13324000	4000	hr8_vs_unstim
chr6	14212000	14732000	130	2.91083	6.94499	21.4157	3.71e-06	0.0394598	14216000	chr6	14736000	4000	hr8_vs_unstim
chr6	14716000	15248000	133	4.47209	6.19873	20.9593	4.7e-06	0.0448511	14720000	chr6	15252000	4000	hr8_vs_unstim
chr6	14724000	15244000	130	4.80653	6.5145	25.991	3.44e-07	0.010431	14728000	chr6	15248000	4000	hr8_vs_unstim
chr6	14728000	15248000	130	3.78983	6.54128	23.5402	1.23e-06	0.0224471	14732000	chr6	15252000	4000	hr8_vs_unstim
chr6	14728000	15252000	131	4.3664	6.06293	20.559	5.8e-06	0.0492361	14732000	chr6	15256000	4000	hr8_vs_unstim
chr6	14732000	14872000	35	2.92953	3.85046	23.1607	2.95e-06	0.0352586	14736000	chr6	14876000	4000	hr8_vs_unstim
chr6	14732000	14876000	36	4.19306	4.23348	42.2812	1.03e-09	0.000239906	14736000	chr6	14880000	4000	hr8_vs_unstim
chr6	14732000	15244000	128	4.67447	7.04954	37.327	1.01e-09	0.000239604	14736000	chr6	15248000	4000	hr8_vs_unstim
chr6	14732000	15248000	129	4.68727	6.55193	23.933	1e-06	0.0200029	14736000	chr6	15252000	4000	hr8_vs_unstim
chr6	14736000	14872000	34	2.84002	3.99389	27.8181	3.48e-07	0.010475	14740000	chr6	14876000	4000	hr8_vs_unstim
chr6	14736000	14876000	35	2.65291	4.01999	22.7383	3.59e-06	0.0389004	14740000	chr6	14880000	4000	hr8_vs_unstim
chr6	14736000	15244000	127	5.52047	6.96191	40.9239	1.6e-10	6.3e-05	14740000	chr6	15248000	4000	hr8_vs_unstim
chr6	14740000	14868000	32	3.37587	3.47454	22.6484	3.74e-06	0.0397388	14744000	chr6	14872000	4000	hr8_vs_unstim
chr6	14740000	15244000	126	3.90357	6.74086	25.5592	4.31e-07	0.0121203	14744000	chr6	15248000	4000	hr8_vs_unstim
chr6	14744000	15244000	125	3.92726	6.8975	30.0708	4.19e-08	0.00290925	14748000	chr6	15248000	4000	hr8_vs_unstim
chr6	14752000	15244000	123	4.9768	6.62578	29.0651	7.03e-08	0.00404761	14756000	chr6	15248000	4000	hr8_vs_unstim
chr6	14756000	15244000	122	5.68579	6.4557	31.7136	1.8e-08	0.00167339	14760000	chr6	15248000	4000	hr8_vs_unstim
chr6	16136000	16176000	10	-2.35053	3.21955	28.6342	7.04e-07	0.0163045	16140000	chr6	16180000	4000	hr8_vs_unstim
chr6	16656000	16760000	26	2.78424	3.84051	26.1342	1.3e-06	0.0230298	16660000	chr6	16764000	4000	hr8_vs_unstim
chr6	16680000	16760000	20	2.67548	3.53867	29.0487	3.23e-07	0.0101171	16684000	chr6	16764000	4000	hr8_vs_unstim
chr6	16688000	16716000	7	2.04044	3.13828	24.189	4.36e-06	0.0429013	16692000	chr6	16720000	4000	hr8_vs_unstim
chr6	16692000	16760000	17	2.56447	3.58928	26.9806	7.77e-07	0.0173067	16696000	chr6	16764000	4000	hr8_vs_unstim
chr6	16696000	16760000	16	2.77219	3.57682	31.5001	1.16e-07	0.00552482	16700000	chr6	16764000	4000	hr8_vs_unstim
chr6	16700000	16760000	15	3.0352	3.34958	32.0906	9.08e-08	0.0047413	16704000	chr6	16764000	4000	hr8_vs_unstim
chr6	24912000	24924000	3	-1.35245	4.02328	29.2397	1.92e-06	0.0284771	24916000	chr6	24928000	4000	hr8_vs_unstim
chr6	24924000	24952000	7	-1.63289	3.44127	23.9199	4.86e-06	0.0455172	24928000	chr6	24956000	4000	hr8_vs_unstim
chr6	24932000	24948000	4	-1.63041	4.14053	46.8304	1.2e-08	0.00128346	24936000	chr6	24952000	4000	hr8_vs_unstim
chr6	30496000	30780000	71	5.10143	4.3779	23.6671	3.19e-06	0.0365975	30500000	chr6	30784000	4000	hr8_vs_unstim
chr6	30512000	31052000	135	2.72379	7.28479	22.1343	2.55e-06	0.0327519	30516000	chr6	31056000	4000	hr8_vs_unstim
chr6	30520000	31048000	132	4.29847	6.76135	28.7951	8.08e-08	0.00444277	30524000	chr6	31052000	4000	hr8_vs_unstim
chr6	30684000	30788000	26	3.51644	2.96813	25.1631	1.95e-06	0.028704	30688000	chr6	30792000	4000	hr8_vs_unstim
chr6	30708000	30780000	18	1.84233	4.3285	25.6036	1.4e-06	0.024143	30712000	chr6	30784000	4000	hr8_vs_unstim
chr6	30708000	30784000	19	2.1966	4.85351	41.7994	1.89e-09	0.000389345	30712000	chr6	30788000	4000	hr8_vs_unstim
chr6	30708000	30788000	20	1.7415	4.49205	25.0905	1.75e-06	0.0273315	30712000	chr6	30792000	4000	hr8_vs_unstim
chr6	30712000	30732000	5	1.30297	4.39338	30.1261	1.44e-06	0.0245547	30716000	chr6	30736000	4000	hr8_vs_unstim
chr6	30712000	30780000	17	1.74996	4.374	22.756	4.88e-06	0.0456686	30716000	chr6	30784000	4000	hr8_vs_unstim
chr6	32216000	32372000	39	3.15556	3.9653	24.7339	1.73e-06	0.0270832	32220000	chr6	32376000	4000	hr8_vs_unstim
chr6	34724000	34852000	32	-2.24084	4.09667	22.1747	4.67e-06	0.0446456	34728000	chr6	34856000	4000	hr8_vs_unstim
chr6	35572000	35588000	4	-1.42818	3.68484	27.2994	3.61e-06	0.0389811	35576000	chr6	35592000	4000	hr8_vs_unstim
chr6	36076000	36088000	3	-1.40554	4.11791	35.0545	3.17e-07	0.00995919	36080000	chr6	36092000	4000	hr8_vs_unstim
chr6	36468000	36548000	20	-2.51243	3.21404	24.0106	2.81e-06	0.0343887	36472000	chr6	36552000	4000	hr8_vs_unstim
chr6	36472000	36516000	11	-2.46489	2.79091	23.5245	5.38e-06	0.0476255	36476000	chr6	36520000	4000	hr8_vs_unstim
chr6	36488000	36504000	4	-1.26355	3.94504	26.4325	4.82e-06	0.0453443	36492000	chr6	36508000	4000	hr8_vs_unstim
chr6	36512000	36724000	53	5.11362	3.63181	24.2007	1.26e-06	0.0226893	36516000	chr6	36728000	4000	hr8_vs_unstim
chr6	36648000	36716000	17	2.7505	3.45611	29.3834	2.8e-07	0.00922436	36652000	chr6	36720000	4000	hr8_vs_unstim
chr6	42568000	43084000	129	-5.40096	6.13571	23.0742	1.56e-06	0.025697	42572000	chr6	43088000	4000	hr8_vs_unstim
chr6	42716000	42736000	5	-1.27622	4.09106	25.8699	5.83e-06	0.0494092	42720000	chr6	42740000	4000	hr8_vs_unstim
chr6	52240000	52264000	6	-1.5165	3.94148	24.2834	4.2e-06	0.0421157	52244000	chr6	52268000	4000	hr8_vs_unstim
chr6	52248000	52260000	3	-1.4445	3.65189	27.0415	3.94e-06	0.040855	52252000	chr6	52264000	4000	hr8_vs_unstim
chr6	53160000	53208000	12	-2.30519	3.22426	24.1889	4.11e-06	0.0416598	53164000	chr6	53212000	4000	hr8_vs_unstim
chr6	90392000	90452000	15	2.41067	3.49481	23.2722	3.89e-06	0.0405612	90396000	chr6	90456000	4000	hr8_vs_unstim
chr6	90616000	91144000	132	-5.34428	5.97629	23.3582	1.35e-06	0.0235099	90620000	chr6	91148000	4000	hr8_vs_unstim
chr6	90616000	91152000	134	-4.81397	6.21917	24.4686	7.58e-07	0.0171264	90620000	chr6	91156000	4000	hr8_vs_unstim
chr6	90624000	91156000	133	-3.40707	6.81631	29.4666	5.72e-08	0.00355368	90628000	chr6	91160000	4000	hr8_vs_unstim
chr6	90628000	91152000	131	-3.13509	6.86428	23.9932	9.7e-07	0.0196655	90632000	chr6	91156000	4000	hr8_vs_unstim
chr6	90632000	91132000	125	-3.89521	6.30996	20.8803	4.9e-06	0.045731	90636000	chr6	91136000	4000	hr8_vs_unstim
chr6	90644000	91148000	126	-3.15457	7.04795	27.8295	1.33e-07	0.00592915	90648000	chr6	91152000	4000	hr8_vs_unstim
chr6	90644000	91180000	134	-1.96212	7.87639	21.5477	3.46e-06	0.038233	90648000	chr6	91184000	4000	hr8_vs_unstim
chr6	90652000	91104000	113	-3.23088	6.70329	32.9835	2.03e-07	0.00748766	90656000	chr6	91108000	4000	hr8_vs_unstim
chr6	90652000	91184000	133	-2.12979	7.75327	22.3242	2.31e-06	0.0310644	90656000	chr6	91188000	4000	hr8_vs_unstim
chr6	90660000	91180000	130	-2.21547	7.54411	20.9049	4.84e-06	0.0454158	90664000	chr6	91184000	4000	hr8_vs_unstim
chr6	90700000	90868000	42	-3.80107	3.78352	28.0329	4.02e-07	0.0116001	90704000	chr6	90872000	4000	hr8_vs_unstim
chr6	90832000	90860000	7	-1.90623	3.00974	23.4634	5.84e-06	0.0494309	90836000	chr6	90864000	4000	hr8_vs_unstim
chr6	90840000	90860000	5	-1.85974	2.92491	26.4864	4.74e-06	0.0450524	90844000	chr6	90864000	4000	hr8_vs_unstim
chr6	90844000	90856000	3	-1.37757	3.86822	28.8848	2.15e-06	0.0299197	90848000	chr6	90860000	4000	hr8_vs_unstim
chr6	90880000	90892000	3	-1.40822	3.69354	28.018	2.85e-06	0.0346431	90884000	chr6	90896000	4000	hr8_vs_unstim
chr6	90900000	90912000	3	-1.60635	3.67361	36.6135	2e-07	0.00745096	90904000	chr6	90916000	4000	hr8_vs_unstim
chr6	90928000	90940000	3	-1.38923	4.37023	32.0865	7.8e-07	0.0173067	90932000	chr6	90944000	4000	hr8_vs_unstim
chr6	90944000	90964000	5	-1.82031	2.9782	29.4698	1.78e-06	0.0274992	90948000	chr6	90968000	4000	hr8_vs_unstim
chr6	90944000	90968000	6	-1.8832	3.49333	29.4766	5.52e-07	0.0141706	90948000	chr6	90972000	4000	hr8_vs_unstim
chr6	90948000	90960000	3	-1.45393	3.88023	29.653	1.68e-06	0.0266316	90952000	chr6	90964000	4000	hr8_vs_unstim
chr6	90948000	90964000	4	-1.86571	3.24106	36.4638	2.09e-07	0.00763618	90952000	chr6	90968000	4000	hr8_vs_unstim
chr6	90948000	90968000	5	-2.75753	3.22676	79.375	8.52e-12	6.93e-06	90952000	chr6	90972000	4000	hr8_vs_unstim
chr6	90948000	90976000	7	-1.72673	3.58875	29.2042	6.12e-07	0.0151086	90952000	chr6	90980000	4000	hr8_vs_unstim
chr6	90952000	90964000	3	-1.78125	3.71512	44.8323	2.02e-08	0.00180805	90956000	chr6	90968000	4000	hr8_vs_unstim
chr6	90952000	90968000	4	-1.82938	3.69858	43.1217	3.2e-08	0.0024733	90956000	chr6	90972000	4000	hr8_vs_unstim
chr6	90952000	90972000	5	-1.83602	3.77626	49.265	6.41e-09	0.000899626	90956000	chr6	90976000	4000	hr8_vs_unstim
chr6	90960000	90972000	3	-1.24918	4.15944	27.0233	3.96e-06	0.0409138	90964000	chr6	90976000	4000	hr8_vs_unstim
chr6	90960000	91176000	54	3.81228	4.10954	24.9883	8.54e-07	0.0181547	90964000	chr6	91180000	4000	hr8_vs_unstim
chr6	90976000	91004000	7	-2.01855	3.24981	30.7377	3.43e-07	0.0104196	90980000	chr6	91008000	4000	hr8_vs_unstim
chr6	90992000	91184000	48	2.53607	5.78128	39.0353	1.04e-09	0.000239906	90996000	chr6	91188000	4000	hr8_vs_unstim
chr6	90992000	91188000	49	2.19758	5.52692	25.0448	8.31e-07	0.0178428	90996000	chr6	91192000	4000	hr8_vs_unstim
chr6	90996000	91104000	27	2.07667	4.79158	34.2567	4.73e-08	0.00310738	91000000	chr6	91108000	4000	hr8_vs_unstim
chr6	90996000	91148000	38	2.95803	4.59575	29.2597	2.35e-07	0.00835124	91000000	chr6	91152000	4000	hr8_vs_unstim
chr6	90996000	91160000	41	3.14373	4.49566	30.7017	1.26e-07	0.00574367	91000000	chr6	91164000	4000	hr8_vs_unstim
chr6	90996000	91168000	43	2.53317	4.61143	24.5844	1.85e-06	0.0278678	91000000	chr6	91172000	4000	hr8_vs_unstim
chr6	90996000	91176000	45	2.60252	5.34528	28.7554	1.37e-07	0.00603559	91000000	chr6	91180000	4000	hr8_vs_unstim
chr6	90996000	91184000	47	1.85327	5.98485	23.7625	1.56e-06	0.0256722	91000000	chr6	91188000	4000	hr8_vs_unstim
chr6	90996000	91188000	48	2.5627	6.04584	41.8852	2.75e-10	9.25e-05	91000000	chr6	91192000	4000	hr8_vs_unstim
chr6	91000000	91148000	37	3.92668	4.1831	31.3152	9.7e-08	0.00491875	91004000	chr6	91152000	4000	hr8_vs_unstim
chr6	91000000	91180000	45	1.99343	5.56783	23.209	2.04e-06	0.0294087	91004000	chr6	91184000	4000	hr8_vs_unstim
chr6	91000000	91184000	46	2.43906	5.69652	33.4571	1.44e-08	0.001421	91004000	chr6	91188000	4000	hr8_vs_unstim
chr6	91000000	91188000	47	2.6572	5.3881	29.8059	8.26e-08	0.00449342	91004000	chr6	91192000	4000	hr8_vs_unstim
chr6	91004000	91104000	25	1.74654	4.90386	28.5133	4.81e-07	0.0129777	91008000	chr6	91108000	4000	hr8_vs_unstim
chr6	91004000	91156000	38	2.6096	4.5286	23.7234	2.72e-06	0.0338113	91008000	chr6	91160000	4000	hr8_vs_unstim
chr6	91004000	91192000	47	2.53889	4.99454	22.2982	3.2e-06	0.0366643	91008000	chr6	91196000	4000	hr8_vs_unstim
chr6	91104000	91184000	20	1.99006	4.58786	33.4724	5.15e-08	0.00331504	91108000	chr6	91188000	4000	hr8_vs_unstim
chr6	106956000	106976000	5	-1.63103	3.27196	27.4014	3.49e-06	0.0383866	106960000	chr6	106980000	4000	hr8_vs_unstim
chr6	109188000	109332000	36	3.98436	3.72663	24.1646	2.23e-06	0.0305403	109192000	chr6	109336000	4000	hr8_vs_unstim
chr6	112108000	112132000	6	-2.02696	3.17861	28.3808	8.39e-07	0.0179095	112112000	chr6	112136000	4000	hr8_vs_unstim
chr6	112112000	112124000	3	-1.37278	3.9717	29.2168	1.93e-06	0.0285419	112116000	chr6	112128000	4000	hr8_vs_unstim
chr6	119668000	119852000	46	3.0704	4.49683	24.4945	1.09e-06	0.0209959	119672000	chr6	119856000	4000	hr8_vs_unstim
chr6	125192000	125436000	61	-2.28591	5.6657	22.4001	5.9e-06	0.0497018	125196000	chr6	125440000	4000	hr8_vs_unstim
chr6	127616000	127784000	42	3.04941	4.03231	24.6967	1.76e-06	0.0273315	127620000	chr6	127788000	4000	hr8_vs_unstim
chr6	127924000	129692000	442	-8.06236	8.84679	30.5963	3.91e-08	0.00278616	127928000	chr6	129696000	4000	hr8_vs_unstim
chr6	129684000	129808000	31	4.37632	3.6622	37.4742	4.88e-09	0.000752346	129688000	chr6	129812000	4000	hr8_vs_unstim
chr6	129688000	129808000	30	3.18706	3.57821	24.0322	1.97e-06	0.0288475	129692000	chr6	129812000	4000	hr8_vs_unstim
chr6	129692000	129808000	29	3.4862	3.68593	30.3661	1.1e-07	0.00535651	129696000	chr6	129812000	4000	hr8_vs_unstim
chr6	129692000	129812000	30	3.46075	3.71831	32.4788	4.32e-08	0.00297766	129696000	chr6	129816000	4000	hr8_vs_unstim
chr6	129692000	129816000	31	3.9322	3.73658	26.0991	7.6e-07	0.0171407	129696000	chr6	129820000	4000	hr8_vs_unstim
chr6	129764000	129808000	11	2.3387	3.3632	26.7774	1.46e-06	0.024647	129768000	chr6	129812000	4000	hr8_vs_unstim
chr6	135408000	135420000	3	-1.51103	3.66798	28.8077	2.21e-06	0.0303722	135412000	chr6	135424000	4000	hr8_vs_unstim
chr6	138124000	138136000	3	-1.52866	3.97835	37.1608	1.7e-07	0.00681455	138128000	chr6	138140000	4000	hr8_vs_unstim
chr6	138124000	138140000	4	-1.31781	4.06285	27.4029	3.49e-06	0.0383866	138128000	chr6	138144000	4000	hr8_vs_unstim
chr6	138188000	138248000	15	1.9689	4.63944	31.9487	9.63e-08	0.00490323	138192000	chr6	138252000	4000	hr8_vs_unstim
chr6	138188000	138264000	19	1.5396	4.76109	22.9295	4.52e-06	0.0437814	138192000	chr6	138268000	4000	hr8_vs_unstim
chr6	139468000	139480000	3	-1.2201	4.0614	25.8671	5.83e-06	0.0494249	139472000	chr6	139484000	4000	hr8_vs_unstim
chr6	143136000	143148000	3	-1.85494	3.15692	34.6037	3.62e-07	0.0108036	143140000	chr6	143152000	4000	hr8_vs_unstim
chr6	143140000	143264000	31	2.12019	4.6614	25.4556	1.02e-06	0.0202533	143144000	chr6	143268000	4000	hr8_vs_unstim
chr6	143188000	143216000	7	-2.0717	2.99263	24.7404	3.49e-06	0.0383866	143192000	chr6	143220000	4000	hr8_vs_unstim
chr6	143208000	143220000	3	-1.22825	4.38522	28.1317	2.75e-06	0.0339457	143212000	chr6	143224000	4000	hr8_vs_unstim
chr6	143220000	143252000	8	-2.14091	2.77621	25.4606	2.62e-06	0.0331963	143224000	chr6	143256000	4000	hr8_vs_unstim
chr6	143224000	143236000	3	-1.51127	3.60612	30.1109	1.45e-06	0.024641	143228000	chr6	143240000	4000	hr8_vs_unstim
chr6	143224000	143244000	5	-2.26617	2.93937	39.7228	8.18e-08	0.00447999	143228000	chr6	143248000	4000	hr8_vs_unstim
chr6	143228000	143240000	3	-1.51334	4.02488	39.8247	7.95e-08	0.00442392	143232000	chr6	143244000	4000	hr8_vs_unstim
chr6	143232000	143244000	3	-1.53348	3.95635	37.2683	1.65e-07	0.00667774	143236000	chr6	143248000	4000	hr8_vs_unstim
chr6	143264000	143456000	48	3.58478	4.2255	26.8154	3.51e-07	0.0105424	143268000	chr6	143460000	4000	hr8_vs_unstim
chr6	144536000	144644000	27	-3.05133	2.89308	24.0727	3.11e-06	0.0362998	144540000	chr6	144648000	4000	hr8_vs_unstim
chr6	150428000	150664000	59	6.18151	4.3687	25.9659	1.25e-06	0.0226718	150432000	chr6	150668000	4000	hr8_vs_unstim
chr6	155216000	155568000	88	5.31923	4.98564	25.6635	1.23e-06	0.0224471	155220000	chr6	155572000	4000	hr8_vs_unstim
chr6	155244000	155496000	63	2.3697	6.25414	31.4926	1.23e-07	0.00570156	155248000	chr6	155500000	4000	hr8_vs_unstim
chr6	155248000	155496000	62	1.98748	6.36288	25.0704	1.84e-06	0.0278268	155252000	chr6	155500000	4000	hr8_vs_unstim
chr6	155248000	155564000	79	3.68396	5.61338	25.4955	1.32e-06	0.0232306	155252000	chr6	155568000	4000	hr8_vs_unstim
chr6	155252000	155424000	43	2.8171	4.28069	23.2358	3.39e-06	0.0378908	155256000	chr6	155428000	4000	hr8_vs_unstim
chr6	155256000	155568000	78	4.01348	5.44777	27.8532	4.72e-07	0.0128873	155260000	chr6	155572000	4000	hr8_vs_unstim
chr6	155264000	155552000	72	3.79033	4.93116	24.6012	2.11e-06	0.0297629	155268000	chr6	155556000	4000	hr8_vs_unstim
chr6	155496000	155628000	33	3.33486	3.52553	24.5516	1.55e-06	0.0255986	155500000	chr6	155632000	4000	hr8_vs_unstim
chr6	155500000	155564000	16	3.77244	3.47574	31.9495	9.63e-08	0.00490323	155504000	chr6	155568000	4000	hr8_vs_unstim
chr6	155736000	155844000	27	3.04341	3.42281	26.9408	9.24e-07	0.0190902	155740000	chr6	155848000	4000	hr8_vs_unstim
chr6	155744000	155844000	25	3.1952	3.39524	26.6613	1.04e-06	0.0203774	155748000	chr6	155848000	4000	hr8_vs_unstim
chr6	159072000	159108000	9	-1.76633	3.54968	27.3564	1.25e-06	0.0226485	159076000	chr6	159112000	4000	hr8_vs_unstim
chr6	159076000	159108000	8	-1.58165	4.01377	29.4434	5.59e-07	0.0142651	159080000	chr6	159112000	4000	hr8_vs_unstim
chr6	159080000	159108000	7	-1.42445	4.15693	25.8204	2.28e-06	0.0307409	159084000	chr6	159112000	4000	hr8_vs_unstim
chr6	159084000	159104000	5	-1.215	4.19257	25.9997	5.58e-06	0.0482903	159088000	chr6	159108000	4000	hr8_vs_unstim
chr6	166820000	166900000	20	-3.17218	2.60434	25.4767	1.48e-06	0.0248796	166824000	chr6	166904000	4000	hr8_vs_unstim
chr6	167416000	167552000	34	-4.01861	3.45632	30.2933	1.14e-07	0.00547437	167420000	chr6	167556000	4000	hr8_vs_unstim
chr7	624000	652000	7	-1.71517	3.68731	23.4532	2.44e-06	0.0319778	628000	chr7	656000	4000	hr8_vs_unstim
chr7	1980000	2024000	11	-2.45407	3.78282	34.3052	9.52e-09	0.00113913	1984000	chr7	2028000	4000	hr8_vs_unstim
chr7	2548000	2560000	3	-1.43066	4.76132	41.4597	6.94e-09	0.000945232	2552000	chr7	2564000	4000	hr8_vs_unstim
chr7	2548000	2564000	4	-1.21101	4.24057	23.8294	4.9e-06	0.045731	2552000	chr7	2568000	4000	hr8_vs_unstim
chr7	2548000	2568000	5	-1.46889	4.24891	34.5356	8.04e-08	0.00443533	2552000	chr7	2572000	4000	hr8_vs_unstim
chr7	6204000	6316000	28	3.18584	4.07012	25.457	5.94e-07	0.0148071	6208000	chr7	6320000	4000	hr8_vs_unstim
chr7	17184000	17272000	22	2.30121	4.24255	22.2046	2.91e-06	0.0350378	17188000	chr7	17276000	4000	hr8_vs_unstim
chr7	17216000	17344000	32	3.36405	3.9648	24.8543	8.03e-07	0.0174892	17220000	chr7	17348000	4000	hr8_vs_unstim
chr7	23312000	23388000	19	2.14975	4.38021	26.8465	3.45e-07	0.010431	23316000	chr7	23392000	4000	hr8_vs_unstim
chr7	23388000	23512000	31	2.68036	4.64234	29.5631	7.78e-08	0.00436812	23392000	chr7	23516000	4000	hr8_vs_unstim
chr7	23392000	23492000	25	2.04477	4.39245	21.3703	4.45e-06	0.0433302	23396000	chr7	23496000	4000	hr8_vs_unstim
chr7	23392000	23508000	29	2.93325	4.67408	33.2587	1.27e-08	0.00131616	23396000	chr7	23512000	4000	hr8_vs_unstim
chr7	23400000	23448000	12	2.11043	3.68651	23.5101	1.75e-06	0.0273315	23404000	chr7	23452000	4000	hr8_vs_unstim
chr7	23400000	23492000	23	2.00702	4.41353	20.9206	5.58e-06	0.0482925	23404000	chr7	23496000	4000	hr8_vs_unstim
chr7	23400000	23508000	27	2.95957	4.14655	35.2391	4.43e-09	0.000722913	23404000	chr7	23512000	4000	hr8_vs_unstim
chr7	23400000	23512000	28	2.40645	4.55636	21.0882	5.31e-06	0.0473375	23404000	chr7	23516000	4000	hr8_vs_unstim
chr7	23408000	23492000	21	2.12023	4.26262	21.2816	4.65e-06	0.0444513	23412000	chr7	23496000	4000	hr8_vs_unstim
chr7	23408000	23512000	26	2.75908	4.20654	31.7226	2.5e-08	0.00210329	23412000	chr7	23516000	4000	hr8_vs_unstim
chr7	23412000	23508000	24	3.1418	3.85588	30.7752	4e-08	0.00281415	23416000	chr7	23512000	4000	hr8_vs_unstim
chr7	23460000	23496000	9	2.30252	3.07559	23.703	2.17e-06	0.0300454	23464000	chr7	23500000	4000	hr8_vs_unstim
chr7	24940000	25016000	19	2.41529	3.98301	24.8964	8.92e-07	0.0187041	24944000	chr7	25020000	4000	hr8_vs_unstim
chr7	25296000	25428000	33	-1.78444	5.33674	24.7823	8.32e-07	0.0178428	25300000	chr7	25432000	4000	hr8_vs_unstim
chr7	30200000	30520000	80	-6.06771	5.31469	24.6168	2.55e-06	0.0327519	30204000	chr7	30524000	4000	hr8_vs_unstim
chr7	32908000	32924000	4	-1.48054	3.64729	23.5209	5.56e-06	0.0482552	32912000	chr7	32928000	4000	hr8_vs_unstim
chr7	36656000	36704000	12	-2.31277	3.01046	21.3144	5.19e-06	0.0468943	36660000	chr7	36708000	4000	hr8_vs_unstim
chr7	36716000	36820000	26	-2.48129	3.64268	23.0213	1.93e-06	0.0285205	36720000	chr7	36824000	4000	hr8_vs_unstim
chr7	36716000	36824000	27	-2.35102	3.88262	25.3687	5.92e-07	0.0148024	36720000	chr7	36828000	4000	hr8_vs_unstim
chr7	36720000	36816000	24	-2.19823	3.81607	21.0308	5.28e-06	0.0472097	36724000	chr7	36820000	4000	hr8_vs_unstim
chr7	36760000	36816000	14	-2.18073	3.54632	26.7903	3.52e-07	0.0105817	36764000	chr7	36820000	4000	hr8_vs_unstim
chr7	36764000	36816000	13	-1.9908	4.08807	30.213	6.73e-08	0.00390989	36768000	chr7	36820000	4000	hr8_vs_unstim
chr7	36764000	36820000	14	-2.12819	3.68585	27.9204	2.04e-07	0.00750964	36768000	chr7	36824000	4000	hr8_vs_unstim
chr7	39988000	40024000	9	-1.69691	3.77345	23.8387	2.04e-06	0.0293538	39992000	chr7	40028000	4000	hr8_vs_unstim
chr7	39992000	40024000	8	-1.63772	3.76836	22.5062	3.81e-06	0.0400964	39996000	chr7	40028000	4000	hr8_vs_unstim
chr7	43632000	43668000	9	-1.71173	3.64669	23.3161	2.6e-06	0.033056	43636000	chr7	43672000	4000	hr8_vs_unstim
chr7	43656000	43676000	5	-1.67377	3.25353	24.5072	3.73e-06	0.0395897	43660000	chr7	43680000	4000	hr8_vs_unstim
chr7	43672000	43688000	4	-1.46039	3.99137	30.0139	4.33e-07	0.0121347	43676000	chr7	43692000	4000	hr8_vs_unstim
chr7	45016000	45036000	5	-1.48813	3.85398	26.2019	1.9e-06	0.0282981	45020000	chr7	45040000	4000	hr8_vs_unstim
chr7	45016000	45068000	13	-1.95757	3.68482	25.0274	8.32e-07	0.0178428	45020000	chr7	45072000	4000	hr8_vs_unstim
chr7	45036000	45072000	9	-1.79301	3.59236	24.0086	1.88e-06	0.0281681	45040000	chr7	45076000	4000	hr8_vs_unstim
chr7	50204000	50452000	62	-3.0293	5.65629	26.7861	5.78e-07	0.0145659	50208000	chr7	50456000	4000	hr8_vs_unstim
chr7	50272000	50316000	11	-3.55155	2.3073	25.5631	6.41e-07	0.0154693	50276000	chr7	50320000	4000	hr8_vs_unstim
chr7	50344000	50356000	3	-1.52158	4.41757	39.6778	1.29e-08	0.00131616	50348000	chr7	50360000	4000	hr8_vs_unstim
chr7	50412000	50424000	3	-1.38817	4.35359	32.6976	1.58e-07	0.00653551	50416000	chr7	50428000	4000	hr8_vs_unstim
chr7	50412000	50428000	4	-1.32432	3.99915	24.7718	3.35e-06	0.0376765	50416000	chr7	50432000	4000	hr8_vs_unstim
chr7	83624000	83824000	50	-5.21846	3.95363	25.1411	9.18e-07	0.0190264	83628000	chr7	83828000	4000	hr8_vs_unstim
chr7	92256000	92440000	46	2.88404	5.68383	30.7737	6.42e-08	0.00379199	92260000	chr7	92444000	4000	hr8_vs_unstim
chr7	99732000	99788000	14	-2.05495	3.61853	26.0521	5.05e-07	0.0133254	99736000	chr7	99792000	4000	hr8_vs_unstim
chr7	99732000	99792000	15	-2.60671	3.69749	30.479	5.97e-08	0.00360613	99736000	chr7	99796000	4000	hr8_vs_unstim
chr7	99736000	99812000	19	-2.19325	3.63602	21.2541	5.37e-06	0.0475846	99740000	chr7	99816000	4000	hr8_vs_unstim
chr7	100728000	100788000	15	2.31477	3.39191	21.4404	4.89e-06	0.0457179	100732000	chr7	100792000	4000	hr8_vs_unstim
chr7	100860000	100892000	8	-1.74551	4.2861	33.2526	2.78e-08	0.00224962	100864000	chr7	100896000	4000	hr8_vs_unstim
chr7	102052000	102072000	5	-1.41617	4.66659	38.4938	1.95e-08	0.00177562	102056000	chr7	102076000	4000	hr8_vs_unstim
chr7	104660000	104688000	7	-1.71076	3.87273	24.5378	1.47e-06	0.0247646	104664000	chr7	104692000	4000	hr8_vs_unstim
chr7	104664000	104684000	5	-1.3747	3.87509	24.4488	3.82e-06	0.0401342	104668000	chr7	104688000	4000	hr8_vs_unstim
chr7	105320000	105520000	50	-3.01826	4.89692	21.4276	5.5e-06	0.0479961	105324000	chr7	105524000	4000	hr8_vs_unstim
chr7	105568000	105684000	29	-2.14964	4.61605	22.9326	2.1e-06	0.0297304	105572000	chr7	105688000	4000	hr8_vs_unstim
chr7	105572000	105680000	27	-2.27427	4.23077	28.1951	1.44e-07	0.00613118	105576000	chr7	105684000	4000	hr8_vs_unstim
chr7	105816000	106036000	55	3.98182	5.22935	23.626	2.45e-06	0.0320371	105820000	chr7	106040000	4000	hr8_vs_unstim
chr7	105988000	106064000	19	2.8605	3.20184	23.6459	1.65e-06	0.0264041	105992000	chr7	106068000	4000	hr8_vs_unstim
chr7	106300000	106372000	18	2.52765	4.92402	42.4233	2.14e-10	7.54e-05	106304000	chr7	106376000	4000	hr8_vs_unstim
chr7	106300000	106376000	19	1.89711	4.35699	21.3684	5.07e-06	0.0464189	106304000	chr7	106380000	4000	hr8_vs_unstim
chr7	108092000	108136000	11	-2.55302	3.50041	36.3938	3.54e-09	0.000616781	108096000	chr7	108140000	4000	hr8_vs_unstim
chr7	115856000	115872000	4	-1.54164	3.47587	24.0429	4.5e-06	0.0436296	115860000	chr7	115876000	4000	hr8_vs_unstim
chr7	123432000	123504000	18	2.50156	4.25424	28.6384	1.45e-07	0.00615577	123436000	chr7	123508000	4000	hr8_vs_unstim
chr7	134332000	134344000	3	-1.40362	4.38217	30.6366	3.42e-07	0.0104082	134336000	chr7	134348000	4000	hr8_vs_unstim
[truncated: 287 more rows]
