# Supplementary material for: Dynamic chromatin architecture identifies new autoimmune-associated enhancers for IL2 and novel genes regulating CD4+ T cell activation
Source: eLife. 2024 Sep 20;13:RP96852. doi: 10.7554/eLife.96852 (PMC11418197; doi:10.7554/eLife.96852)
Supplement: Supplementary file 10. [file elife-96852-supp10.xlsx]

## Sheet: unstim vs 8hr
Table S10: Summary of TF footprinting
Motif	Num	Protection_Score_8hr	Protection_Score_Unstim	TC_8hr	TC_Unstim	TF_Activity	Z_score	P_values	motif_id	gene_name	gene_id	TF_family	logFC	FDR	comp	class
MA1579.1.ZBTB26	5487	0.0761166	0.0840108	0.553789	0.554485	0.0085899	0.0787711	0.937215	MA1579.1	ZBTB26	ENSG00000171448	C2H2 ZF	0.229166	0.881227	CD4_8hr_vs_unstim	NS
MA0755.1.CUX2	123	0.499098	0.519452	0.484109	0.423903	-0.0398517	-0.156797	0.875404	MA0755.1	CUX2	ENSG00000111249	CUT,Homeodomain	-0.119834	0.999946	CD4_8hr_vs_unstim	NS
MA1533.1.NR1I2	2065	0.21455	0.207732	0.779319	0.842011	0.0558745	0.308713	0.75754	MA1533.1	NR1I2	ENSG00000144852	Nuclear receptor	0.158781	0.999946	CD4_8hr_vs_unstim	NS
MA1135.1.FOSB::JUNB	356	1.0689	0.423129	0.941242	0.535523	-1.05149	-5.07635	3.84758e-07	MA1135.1	FOSB	ENSG00000125740	bZIP	3.74162	6.80408e-08	CD4_8hr_vs_unstim	both
MA0634.1.ALX3	1226	0.476717	0.359726	0.411952	0.346763	-0.18218	-0.848933	0.395918	MA0634.1	ALX3	ENSG00000156150	Homeodomain	-0.0380954	0.999946	CD4_8hr_vs_unstim	NS
MA0114.4.HNF4A	4103	-0.137446	-0.0960356	0.487059	0.489004	0.0433548	0.247831	0.804265	MA0114.4	HNF4A	ENSG00000101076	Nuclear receptor	-0.29182	0.999946	CD4_8hr_vs_unstim	NS
MA0906.1.HOXC12	2040	0.339402	0.318199	0.532836	0.460646	-0.0933934	-0.417168	0.676555	MA0906.1	HOXC12	ENSG00000123407	Homeodomain	0.265385	0.999946	CD4_8hr_vs_unstim	NS
MA1628.1.Zic1::Zic2	11892	0.0925546	0.0884856	0.87352	0.935585	0.0579963	0.319032	0.749702	MA1628.1	ZIC1	ENSG00000152977	C2H2 ZF	-0.211001	0.999946	CD4_8hr_vs_unstim	NS
MA1628.1.Zic1::Zic2	11892	0.0925546	0.0884856	0.87352	0.935585	0.0579963	0.319032	0.749702	MA1628.1	ZIC2	ENSG00000043355	C2H2 ZF	0.0758994	0.999946	CD4_8hr_vs_unstim	NS
MA0524.2.TFAP2C	697	-0.175368	-0.304087	1.02409	1.11701	-0.0357929	-0.13706	0.890983	MA0524.2	TFAP2C	ENSG00000087510	AP-2	-0.323024	0.999946	CD4_8hr_vs_unstim	NS
MA1623.1.Stat2	26410	0.51455	0.498647	0.605788	0.539185	-0.0825058	-0.364222	0.715692	MA1623.1	STAT2	ENSG00000170581	STAT	0.106115	0.999946	CD4_8hr_vs_unstim	NS
MA1537.1.NR2F1(var.2)	1162	0.247652	0.26428	0.722647	0.737157	0.0311386	0.188424	0.850544	MA1537.1	NR2F1	ENSG00000175745	Nuclear receptor	-0.243955	0.999946	CD4_8hr_vs_unstim	NS
MA1135.1.FOSB::JUNB	356	1.0689	0.423129	0.941242	0.535523	-1.05149	-5.07635	3.84758e-07	MA1135.1	JUNB	ENSG00000171223	bZIP	1.9656	0.000149157	CD4_8hr_vs_unstim	both
MA0655.1.JDP2	19241	0.710504	0.260262	0.844266	0.316425	-0.978082	-4.71936	2.36589e-06	MA0655.1	JDP2	ENSG00000140044	bZIP	0.160793	0.999946	CD4_8hr_vs_unstim	footprint
MA0874.1.Arx	2280	0.420285	0.346601	0.473649	0.413876	-0.133457	-0.611995	0.540541	MA0874.1	ARX	ENSG00000004848	Homeodomain	-0.367641	0.965805	CD4_8hr_vs_unstim	NS
MA0477.2.FOSL1	17833	0.451899	0.134819	0.865171	0.319646	-0.862606	-4.15781	3.21318e-05	MA0477.2	FOSL1	ENSG00000175592	bZIP	6.82772	1.30627e-10	CD4_8hr_vs_unstim	both
MA0057.1.MZF1(var.2)	9562	1.35701	1.40507	1.0802	1.09791	0.0657728	0.356848	0.721206	MA0057.1	MZF1	ENSG00000099326	C2H2 ZF	0.173759	0.980987	CD4_8hr_vs_unstim	NS
MA0854.1.Alx1	701	0.317319	0.228301	0.399922	0.339398	-0.149542	-0.690218	0.490057	MA0854.1	ALX1	ENSG00000180318	Homeodomain	-0.0711846	0.999946	CD4_8hr_vs_unstim	NS
MA0618.1.LBX1	469	0.667088	0.552144	0.532855	0.452053	-0.195746	-0.914905	0.360242	MA0618.1	LBX1	ENSG00000138136	Homeodomain	-0.222397	0.999946	CD4_8hr_vs_unstim	NS
MA1577.1.TLX2	440	0.664582	0.54874	0.53782	0.494948	-0.158714	-0.734816	0.462452	MA1577.1	TLX2	ENSG00000115297	Homeodomain	-0.203648	0.999946	CD4_8hr_vs_unstim	NS
MA0757.1.ONECUT3	1414	0.529595	0.490561	0.435136	0.394896	-0.0792738	-0.348505	0.727461	MA0757.1	ONECUT3	ENSG00000205922	CUT,Homeodomain	-0.204116	0.999946	CD4_8hr_vs_unstim	NS
MA0056.2.MZF1	4717	0.0806018	0.0840396	0.654785	0.613491	-0.0378561	-0.147093	0.883058	MA0056.2	MZF1	ENSG00000099326	C2H2 ZF	0.173759	0.980987	CD4_8hr_vs_unstim	NS
MA0840.1.Creb5	159	0.88927	0.841168	1.01887	1.10711	0.0401419	0.232207	0.816377	MA0840.1	CREB5	ENSG00000146592	bZIP	0.94389	0.0692753	CD4_8hr_vs_unstim	NS
MA1634.1.BATF	18120	0.481961	0.155045	0.824553	0.316167	-0.835302	-4.02503	5.69689e-05	MA1634.1	BATF	ENSG00000156127	bZIP	4.40559	6.47559e-09	CD4_8hr_vs_unstim	both
MA0689.1.TBX20	2903	0.459427	0.452825	0.620592	0.602957	-0.024237	-0.0808642	0.93555	MA0689.1	TBX20	ENSG00000164532	T-box	0.110862	0.999946	CD4_8hr_vs_unstim	NS
MA0792.1.POU5F1B	7574	0.686903	0.641022	0.568494	0.511594	-0.102781	-0.462819	0.643494	MA0792.1	POU5F1B	ENSG00000212993	Homeodomain	-0.459812	0.830923	CD4_8hr_vs_unstim	NS
MA0812.1.TFAP2B(var.2)	2569	-0.2556	-0.30566	1.40242	1.54302	0.0905409	0.477294	0.633153	MA0812.1	TFAP2B	ENSG00000008196	AP-2	-0.195506	0.999946	CD4_8hr_vs_unstim	NS
MA0656.1.JDP2(var.2)	4547	0.86098	0.839065	1.452	1.51887	0.0449607	0.25564	0.798229	MA0656.1	JDP2	ENSG00000140044	bZIP	0.160793	0.999946	CD4_8hr_vs_unstim	NS
MA1138.1.FOSL2::JUNB	19882	0.356936	0.101469	0.887432	0.332127	-0.810772	-3.90574	9.39381e-05	MA1138.1	FOSL2	ENSG00000075426	bZIP	4.77059	2.59666e-09	CD4_8hr_vs_unstim	both
MA1138.1.FOSL2::JUNB	19882	0.356936	0.101469	0.887432	0.332127	-0.810772	-3.90574	9.39381e-05	MA1138.1	JUNB	ENSG00000171223	bZIP	1.9656	0.000149157	CD4_8hr_vs_unstim	both
MA0489.1.JUN(var.2)	17090	0.417737	0.136706	0.862027	0.333351	-0.809707	-3.90056	9.59698e-05	MA0489.1	JUN	ENSG00000177606	bZIP	1.18698	0.00984663	CD4_8hr_vs_unstim	both
MA0699.1.LBX2	745	0.624836	0.518452	0.373552	0.335109	-0.144828	-0.667289	0.504588	MA0699.1	LBX2	ENSG00000179528	Homeodomain	-0.0665563	0.999946	CD4_8hr_vs_unstim	NS
MA1101.2.BACH2	9799	0.433343	0.142147	0.844521	0.33107	-0.804648	-3.87596	0.000106206	MA1101.2	BACH2	ENSG00000112182	bZIP	2.37439	7.32258e-05	CD4_8hr_vs_unstim	both
MA0099.3.FOS::JUN	18493	0.351297	0.100734	0.901982	0.348416	-0.804129	-3.87344	0.000107312	MA0099.3	FOS	ENSG00000170345	bZIP	3.66952	1.24821e-08	CD4_8hr_vs_unstim	both
MA0093.3.USF1	536	0.418934	0.353597	0.505382	0.446097	-0.124621	-0.569028	0.569337	MA0093.3	USF1	ENSG00000158773	bHLH	-0.293917	0.778422	CD4_8hr_vs_unstim	NS
MA0664.1.MLXIPL	286	0.11223	0.0552845	0.931304	1.00041	0.0121637	0.0961503	0.923401	MA0664.1	MLXIPL	ENSG00000009950	bHLH	-0.00147704	0.999946	CD4_8hr_vs_unstim	NS
MA0868.2.SOX8	5489	0.441137	0.472189	0.499757	0.514109	0.0454037	0.257795	0.796565	MA0868.2	SOX8	ENSG00000005513	Sox	0.221592	0.958605	CD4_8hr_vs_unstim	NS
MA0099.3.FOS::JUN	18493	0.351297	0.100734	0.901982	0.348416	-0.804129	-3.87344	0.000107312	MA0099.3	JUN	ENSG00000177606	bZIP	1.18698	0.00984663	CD4_8hr_vs_unstim	both
MA1529.1.NHLH2	5860	-0.0152701	-0.0344603	1.04115	1.11211	0.0517763	0.288784	0.772747	MA1529.1	NHLH2	ENSG00000177551	bHLH	0.0168359	0.999946	CD4_8hr_vs_unstim	NS
MA0811.1.TFAP2B	1475	-0.235617	-0.254124	0.88165	0.898604	-0.00155285	0.0294475	0.976508	MA0811.1	TFAP2B	ENSG00000008196	AP-2	-0.195506	0.999946	CD4_8hr_vs_unstim	NS
MA1142.1.FOSL1::JUND	2653	0.76378	0.353274	0.822119	0.452785	-0.779841	-3.75532	0.000173118	MA1142.1	FOSL1	ENSG00000175592	bZIP	6.82772	1.30627e-10	CD4_8hr_vs_unstim	both
MA1491.1.GLI3	5861	0.844596	0.936253	1.06219	1.12028	0.149753	0.765237	0.44413	MA1491.1	GLI3	ENSG00000106571	C2H2 ZF	-0.0303772	0.999946	CD4_8hr_vs_unstim	NS
MA0766.2.GATA5	4124	0.256493	0.265774	0.531117	0.531914	0.0100777	0.0860059	0.931462	MA0766.2	GATA5	ENSG00000130700	GATA	0.0519553	0.999946	CD4_8hr_vs_unstim	NS
MA1581.1.ZBTB6	7060	-0.0737381	-0.10454	0.724398	0.7612	0.0060005	0.066179	0.947235	MA1581.1	ZBTB6	ENSG00000186130	C2H2 ZF	0.841065	0.0658725	CD4_8hr_vs_unstim	NS
MA1118.1.SIX1	4838	0.234665	0.216851	0.606117	0.569217	-0.054713	-0.229067	0.818817	MA1118.1	SIX1	ENSG00000126778	Homeodomain	-0.448641	0.883552	CD4_8hr_vs_unstim	NS
MA0914.1.ISL2	3576	0.144544	0.136073	0.515958	0.482998	-0.0414308	-0.164477	0.869356	MA0914.1	ISL2	ENSG00000159556	Homeodomain	-0.38481	0.970285	CD4_8hr_vs_unstim	NS
MA1478.1.DMRTA2	1462	-0.0948435	-0.08592	0.418382	0.427505	0.0180468	0.124759	0.900714	MA1478.1	DMRTA2	ENSG00000142700	DM	0.128527	0.999946	CD4_8hr_vs_unstim	NS
MA1142.1.FOSL1::JUND	2653	0.76378	0.353274	0.822119	0.452785	-0.779841	-3.75532	0.000173118	MA1142.1	JUND	ENSG00000130522	bZIP	0.829847	0.100959	CD4_8hr_vs_unstim	footprint
MA1631.1.ASCL1(var.2)	2804	-0.0327397	-0.0809896	0.953771	1.05435	0.0523305	0.291479	0.770685	MA1631.1	ASCL1	ENSG00000139352	bHLH	-0.175694	0.999946	CD4_8hr_vs_unstim	NS
MA0770.1.HSF2	3236	-0.0802043	-0.0816411	0.545295	0.511091	-0.0356406	-0.136319	0.891569	MA0770.1	HSF2	ENSG00000025156	HSF	0.430902	0.478699	CD4_8hr_vs_unstim	NS
MA0478.1.FOSL2	18496	0.403388	0.138387	0.859687	0.355496	-0.769192	-3.70354	0.000212614	MA0478.1	FOSL2	ENSG00000075426	bZIP	4.77059	2.59666e-09	CD4_8hr_vs_unstim	both
MA0893.2.GSX2	910	1.11267	0.901736	0.677244	0.584565	-0.303616	-1.43947	0.150018	MA0893.2	GSX2	ENSG00000180613	Homeodomain	-0.0453211	0.999946	CD4_8hr_vs_unstim	NS
MA0890.1.GBX2	222	0.328558	0.263467	0.443301	0.359971	-0.14842	-0.684759	0.493496	MA0890.1	GBX2	ENSG00000168505	Homeodomain	0.249705	0.999946	CD4_8hr_vs_unstim	NS
MA0499.2.MYOD1	2752	-0.326088	-0.350367	0.74355	0.798622	0.0307934	0.186746	0.85186	MA0499.2	MYOD1	ENSG00000129152	bHLH	-0.061088	0.999946	CD4_8hr_vs_unstim	NS
MA1622.1.Smad2::Smad3	16923	0.280967	0.0614492	0.854659	0.320433	-0.753743	-3.62841	0.00028517	MA1622.1	SMAD2	ENSG00000175387	NA	-0.0939178	0.999946	CD4_8hr_vs_unstim	footprint
MA0756.1.ONECUT2	2725	0.424815	0.432714	0.401917	0.379956	-0.0140616	-0.0313819	0.974965	MA0756.1	ONECUT2	ENSG00000119547	CUT,Homeodomain	-0.326567	0.969447	CD4_8hr_vs_unstim	NS
MA1622.1.Smad2::Smad3	16923	0.280967	0.0614492	0.854659	0.320433	-0.753743	-3.62841	0.00028517	MA1622.1	SMAD3	ENSG00000166949	SMAD	0.212627	0.961789	CD4_8hr_vs_unstim	footprint
MA1603.1.Dmrt1	4315	0.116638	0.118914	0.461018	0.444462	-0.0142804	-0.0324457	0.974117	MA1603.1	DMRT1	ENSG00000137090	DM	-0.402628	0.969142	CD4_8hr_vs_unstim	NS
MA1475.1.CREB3L4(var.2)	699	0.53268	0.548049	2.74495	2.98012	0.250536	1.25534	0.209356	MA1475.1	CREB3L4	ENSG00000143578	bZIP	-0.80608	0.13659	CD4_8hr_vs_unstim	NS
MA0789.1.POU3F4	1136	0.461256	0.419048	0.386441	0.353603	-0.075046	-0.327946	0.742953	MA0789.1	POU3F4	ENSG00000196767	Homeodomain,POU	-0.484184	0.942896	CD4_8hr_vs_unstim	NS
MA0014.3.PAX5	2685	0.584654	0.663004	1.75571	1.8953	0.217945	1.09685	0.272706	MA0014.3	PAX5	ENSG00000196092	Paired box	0.0888097	0.999946	CD4_8hr_vs_unstim	NS
MA0104.4.MYCN	2170	0.535483	0.532977	1.31325	1.30509	-0.0106663	-0.0148705	0.988136	MA0104.4	MYCN	ENSG00000134323	bHLH	-0.194521	0.999946	CD4_8hr_vs_unstim	NS
MA0037.3.GATA3	4709	0.273355	0.274888	0.517603	0.531544	0.0154728	0.112242	0.910631	MA0037.3	GATA3	ENSG00000107485	GATA	-0.0760265	0.999946	CD4_8hr_vs_unstim	NS
MA0070.1.PBX1	4212	0.679954	0.658787	0.603294	0.582792	-0.0416688	-0.165634	0.868445	MA0070.1	PBX1	ENSG00000185630	Homeodomain	-0.291073	0.909753	CD4_8hr_vs_unstim	NS
MA0668.1.NEUROD2	307	0.78887	0.854085	0.782149	0.770955	0.0540212	0.299701	0.764405	MA0668.1	NEUROD2	ENSG00000171532	bHLH	-0.185065	0.999946	CD4_8hr_vs_unstim	NS
MA0640.2.ELF3	17903	0.62624	0.747611	0.871542	1.04965	0.299477	1.49334	0.135348	MA0640.2	ELF3	ENSG00000163435	Ets	-0.126961	0.999946	CD4_8hr_vs_unstim	NS
MA0476.1.FOS	6843	0.36621	0.104468	0.852977	0.361363	-0.753355	-3.62652	0.000287261	MA0476.1	FOS	ENSG00000170345	bZIP	3.66952	1.24821e-08	CD4_8hr_vs_unstim	both
MA0614.1.Foxj2	750	0.885871	0.86498	0.621109	0.59394	-0.0480599	-0.196714	0.844052	MA0614.1	FOXJ2	ENSG00000065970	Forkhead	-0.398791	0.581512	CD4_8hr_vs_unstim	NS
MA0467.1.Crx	4650	0.302043	0.261971	0.511411	0.490788	-0.0606952	-0.258158	0.796285	MA0467.1	CRX	ENSG00000105392	Homeodomain	-0.11232	0.999946	CD4_8hr_vs_unstim	NS
MA1130.1.FOSL2::JUN	16266	0.255102	0.0520041	0.888621	0.339076	-0.752643	-3.62306	0.000291139	MA1130.1	FOSL2	ENSG00000075426	bZIP	4.77059	2.59666e-09	CD4_8hr_vs_unstim	both
MA1143.1.FOSL1::JUND(var.2)	2025	1.0381	0.866181	0.972328	0.911048	-0.233201	-1.09704	0.272622	MA1143.1	JUND	ENSG00000130522	bZIP	0.829847	0.100959	CD4_8hr_vs_unstim	NS
MA0651.1.HOXC11	100	0.193765	0.295163	0.309914	0.360644	0.152129	0.776794	0.43728	MA0651.1	HOXC11	ENSG00000123388	Homeodomain	0.0322485	0.999946	CD4_8hr_vs_unstim	NS
MA0686.1.SPDEF	2518	-0.929695	-1.06134	1.4549	1.76137	0.174822	0.887146	0.375	MA0686.1	SPDEF	ENSG00000124664	Ets	0.0709317	0.999946	CD4_8hr_vs_unstim	NS
MA0683.1.POU4F2	1524	0.552475	0.418686	0.453484	0.382326	-0.204947	-0.959648	0.337232	MA0683.1	POU4F2	ENSG00000151615	Homeodomain,POU	-0.40109	0.953162	CD4_8hr_vs_unstim	NS
MA1130.1.FOSL2::JUN	16266	0.255102	0.0520041	0.888621	0.339076	-0.752643	-3.62306	0.000291139	MA1130.1	JUN	ENSG00000177606	bZIP	1.18698	0.00984663	CD4_8hr_vs_unstim	both
MA0462.2.BATF::JUN	165	0.551299	0.255081	0.766957	0.332989	-0.730186	-3.51385	0.000441658	MA0462.2	BATF	ENSG00000156127	bZIP	4.40559	6.47559e-09	CD4_8hr_vs_unstim	both
MA0462.2.BATF::JUN	165	0.551299	0.255081	0.766957	0.332989	-0.730186	-3.51385	0.000441658	MA0462.2	JUN	ENSG00000177606	bZIP	1.18698	0.00984663	CD4_8hr_vs_unstim	both
MA0461.2.Atoh1	29	0.220671	0.242116	0.300509	0.324874	0.045809	0.259765	0.795045	MA0461.2	ATOH1	ENSG00000172238	bHLH	0.0662181	0.999946	CD4_8hr_vs_unstim	NS
MA0513.1.SMAD2::SMAD3::SMAD4	8696	0.309036	0.344148	0.68716	0.705023	0.0529753	0.294615	0.768288	MA0513.1	SMAD2	ENSG00000175387	NA	-0.0939178	0.999946	CD4_8hr_vs_unstim	NS
MA0513.1.SMAD2::SMAD3::SMAD4	8696	0.309036	0.344148	0.68716	0.705023	0.0529753	0.294615	0.768288	MA0513.1	SMAD3	ENSG00000166949	SMAD	0.212627	0.961789	CD4_8hr_vs_unstim	NS
MA0513.1.SMAD2::SMAD3::SMAD4	8696	0.309036	0.344148	0.68716	0.705023	0.0529753	0.294615	0.768288	MA0513.1	SMAD4	ENSG00000141646	SMAD	-0.3268	0.758564	CD4_8hr_vs_unstim	NS
MA0679.2.ONECUT1	4599	0.42828	0.382061	0.396534	0.356585	-0.0861689	-0.382036	0.702435	MA0679.2	ONECUT1	ENSG00000169856	CUT,Homeodomain	-0.378833	0.964869	CD4_8hr_vs_unstim	NS
MA1134.1.FOS::JUNB	17542	0.212369	0.0400432	0.879841	0.326236	-0.725931	-3.49316	0.000477336	MA1134.1	FOS	ENSG00000170345	bZIP	3.66952	1.24821e-08	CD4_8hr_vs_unstim	both
MA1134.1.FOS::JUNB	17542	0.212369	0.0400432	0.879841	0.326236	-0.725931	-3.49316	0.000477336	MA1134.1	JUNB	ENSG00000171223	bZIP	1.9656	0.000149157	CD4_8hr_vs_unstim	both
MA0661.1.MEOX1	286	0.469725	0.323189	0.543187	0.376746	-0.312977	-1.48499	0.137546	MA0661.1	MEOX1	ENSG00000005102	Homeodomain	-0.310573	0.999946	CD4_8hr_vs_unstim	NS
MA0491.2.JUND	519	0.731179	0.350677	0.661298	0.335999	-0.705802	-3.39528	0.00068559	MA0491.2	JUND	ENSG00000130522	bZIP	0.829847	0.100959	CD4_8hr_vs_unstim	footprint
MA1144.1.FOSL2::JUND	297	-0.0735598	-0.039961	1.15807	0.441229	-0.683245	-3.28558	0.00101772	MA1144.1	FOSL2	ENSG00000075426	bZIP	4.77059	2.59666e-09	CD4_8hr_vs_unstim	both
MA0846.1.FOXC2	9150	0.454602	0.504296	0.45905	0.500452	0.0910972	0.48	0.631228	MA0846.1	FOXC2	ENSG00000176692	Forkhead	0.1288	0.999946	CD4_8hr_vs_unstim	NS
MA1144.1.FOSL2::JUND	297	-0.0735598	-0.039961	1.15807	0.441229	-0.683245	-3.28558	0.00101772	MA1144.1	JUND	ENSG00000130522	bZIP	0.829847	0.100959	CD4_8hr_vs_unstim	footprint
MA0875.1.BARX1	1104	0.271917	0.270743	0.425451	0.385786	-0.0408399	-0.161603	0.871619	MA0875.1	BARX1	ENSG00000131668	Homeodomain	-0.349385	0.996433	CD4_8hr_vs_unstim	NS
MA1137.1.FOSL1::JUNB	470	0.566534	0.209037	0.662413	0.358894	-0.661017	-3.17749	0.00148558	MA1137.1	FOSL1	ENSG00000175592	bZIP	6.82772	1.30627e-10	CD4_8hr_vs_unstim	both
MA0642.1.EN2	318	-0.224886	-0.27246	2.53156	2.76637	0.187244	0.947557	0.343355	MA0642.1	EN2	ENSG00000164778	Homeodomain	-0.305983	0.999946	CD4_8hr_vs_unstim	NS
MA0156.2.FEV	4513	-0.879186	-0.95794	1.74006	2.00727	0.188465	0.953496	0.340339	MA0156.2	FEV	ENSG00000163497	Ets	-0.0894826	0.999946	CD4_8hr_vs_unstim	NS
MA0043.3.HLF	3116	0.437828	0.43631	0.504285	0.49039	-0.0154136	-0.0379563	0.969722	MA0043.3	HLF	ENSG00000108924	bZIP	0.555679	0.541942	CD4_8hr_vs_unstim	NS
MA1584.1.ZIC5	5848	0.36896	0.360801	1.4765	1.56091	0.076242	0.407759	0.68345	MA1584.1	ZIC5	ENSG00000139800	C2H2 ZF	0.0668845	0.999946	CD4_8hr_vs_unstim	NS
MA0794.1.PROX1	1818	0.00833647	0.0266782	0.76003	0.746017	0.00432835	0.0580474	0.953711	MA0794.1	PROX1	ENSG00000117707	Prospero	-0.182089	0.999946	CD4_8hr_vs_unstim	NS
MA1137.1.FOSL1::JUNB	470	0.566534	0.209037	0.662413	0.358894	-0.661017	-3.17749	0.00148558	MA1137.1	JUNB	ENSG00000171223	bZIP	1.9656	0.000149157	CD4_8hr_vs_unstim	both
MA0835.2.BATF3	677	0.628592	0.27018	0.581057	0.317958	-0.621511	-2.98537	0.00283232	MA0835.2	BATF3	ENSG00000123685	bZIP	4.6839	2.19156e-08	CD4_8hr_vs_unstim	both
MA1128.1.FOSL1::JUN	1160	0.372728	0.114348	1.10436	0.775824	-0.586916	-2.81714	0.00484532	MA1128.1	FOSL1	ENSG00000175592	bZIP	6.82772	1.30627e-10	CD4_8hr_vs_unstim	both
MA0843.1.TEF	2200	0.523145	0.510705	0.536828	0.540948	-0.00832069	-0.00346415	0.997236	MA0843.1	TEF	ENSG00000167074	bZIP	0.666576	0.148517	CD4_8hr_vs_unstim	NS
MA1128.1.FOSL1::JUN	1160	0.372728	0.114348	1.10436	0.775824	-0.586916	-2.81714	0.00484532	MA1128.1	JUN	ENSG00000177606	bZIP	1.18698	0.00984663	CD4_8hr_vs_unstim	both
MA0903.1.HOXB3	408	0.690565	0.36764	0.60543	0.350033	-0.578321	-2.77534	0.00551435	MA0903.1	HOXB3	ENSG00000120093	Homeodomain	-0.647143	0.299556	CD4_8hr_vs_unstim	footprint
MA0490.2.JUNB	437	0.562825	0.264618	0.580782	0.305218	-0.573771	-2.75322	0.0059013	MA0490.2	JUNB	ENSG00000171223	bZIP	1.9656	0.000149157	CD4_8hr_vs_unstim	both
MA0602.1.Arid5a	4076	0.301512	0.245671	0.357617	0.295204	-0.118253	-0.53806	0.590536	MA0602.1	ARID5A	ENSG00000196843	ARID/BRIGHT	0.3824	0.681887	CD4_8hr_vs_unstim	NS
MA0768.1.LEF1	8214	0.398377	0.409225	0.531256	0.543952	0.0235441	0.151493	0.879587	MA0768.1	LEF1	ENSG00000138795	Sox	-0.597401	0.364986	CD4_8hr_vs_unstim	NS
MA0841.1.NFE2	3210	0.649044	0.375574	0.70689	0.441198	-0.539161	-2.58491	0.00974041	MA0841.1	NFE2	ENSG00000123405	bZIP	-0.141542	0.999946	CD4_8hr_vs_unstim	footprint
MA0680.1.PAX7	525	0.470911	0.464556	0.407029	0.390007	-0.0233773	-0.0766837	0.938875	MA0680.1	PAX7	ENSG00000009709	Homeodomain,Paired box	-0.0248967	0.999946	CD4_8hr_vs_unstim	NS
MA0509.2.RFX1	5192	0.614623	0.699399	0.875735	1.00361	0.212653	1.07112	0.284116	MA0509.2	RFX1	ENSG00000132005	RFX	-0.428069	0.391681	CD4_8hr_vs_unstim	NS
MA1521.1.MAFA	5423	-0.0400826	-0.126149	0.861676	0.829489	-0.118254	-0.538063	0.590534	MA1521.1	MAFA	ENSG00000182759	bZIP	0.123547	0.999946	CD4_8hr_vs_unstim	NS
MA1141.1.FOS::JUND	5015	0.110902	0.0248621	0.92761	0.480795	-0.532855	-2.55424	0.0106418	MA1141.1	FOS	ENSG00000170345	bZIP	3.66952	1.24821e-08	CD4_8hr_vs_unstim	both
MA1141.1.FOS::JUND	5015	0.110902	0.0248621	0.92761	0.480795	-0.532855	-2.55424	0.0106418	MA1141.1	JUND	ENSG00000130522	bZIP	0.829847	0.100959	CD4_8hr_vs_unstim	footprint
MA1633.1.BACH1	12525	0.271484	0.0961005	0.804202	0.456878	-0.522707	-2.5049	0.0122487	MA1633.1	BACH1	ENSG00000156273	bZIP	1.24098	0.00766634	CD4_8hr_vs_unstim	both
MA0703.2.LMX1B	2446	0.460179	0.351272	0.427608	0.351277	-0.185239	-0.863806	0.387695	MA0703.2	LMX1B	ENSG00000136944	Homeodomain	-0.0581939	0.999946	CD4_8hr_vs_unstim	NS
MA0089.2.NFE2L1	8078	0.204044	0.0615439	0.711099	0.376745	-0.476855	-2.28192	0.0224941	MA0089.2	NFE2L1	ENSG00000082641	bZIP	1.11109	0.0192154	CD4_8hr_vs_unstim	both
MA0091.1.TAL1::TCF3	5964	0.189029	0.171333	0.497609	0.504555	-0.0107492	-0.015274	0.987814	MA0091.1	TAL1	ENSG00000162367	bHLH	-0.332975	0.918645	CD4_8hr_vs_unstim	NS
MA0501.1.MAF::NFE2	7972	0.342371	0.163601	0.704256	0.407372	-0.475653	-2.27608	0.0228414	MA0501.1	MAF	ENSG00000178573	bZIP	-0.335623	0.78276	CD4_8hr_vs_unstim	footprint
MA0068.2.PAX4	126	0.292627	0.176426	0.865742	0.814556	-0.167387	-0.776995	0.437162	MA0068.2	PAX4	ENSG00000106331	Homeodomain,Paired box	-0.276703	0.999946	CD4_8hr_vs_unstim	NS
MA0842.2.NRL	4062	0.133384	0.102929	0.533905	0.510445	-0.0539138	-0.225181	0.821838	MA0842.2	NRL	ENSG00000129535	bZIP	0.294795	0.93081	CD4_8hr_vs_unstim	NS
MA0501.1.MAF::NFE2	7972	0.342371	0.163601	0.704256	0.407372	-0.475653	-2.27608	0.0228414	MA0501.1	NFE2	ENSG00000123405	bZIP	-0.141542	0.999946	CD4_8hr_vs_unstim	footprint
MA0482.2.GATA4	6017	0.445621	0.448847	0.500995	0.491361	-0.00640908	0.0058319	0.995347	MA0482.2	GATA4	ENSG00000136574	GATA	0.198052	0.999946	CD4_8hr_vs_unstim	NS
MA1506.1.HOXD10	279	0.555057	0.511424	0.725528	0.687049	-0.0821117	-0.362306	0.717124	MA1506.1	HOXD10	ENSG00000128710	Homeodomain	-0.481467	0.921782	CD4_8hr_vs_unstim	NS
MA0870.1.Sox1	2359	0.0727336	0.0766144	0.501902	0.499435	0.00141324	0.0438714	0.965007	MA0870.1	SOX1	ENSG00000182968	Sox	-0.153821	0.999946	CD4_8hr_vs_unstim	NS
MA0466.2.CEBPB	52	0.451396	0.171722	0.425291	0.252806	-0.452159	-2.16182	0.0306319	MA0466.2	CEBPB	ENSG00000172216	bZIP	0.918862	0.0322313	CD4_8hr_vs_unstim	both
MA1149.1.RARA::RXRG	3364	0.367613	0.388136	0.860932	0.892319	0.0519096	0.289432	0.772251	MA1149.1	RXRG	ENSG00000143171	Nuclear receptor	0.0675244	0.999946	CD4_8hr_vs_unstim	NS
MA0912.2.HOXD3	1914	0.858	0.667207	0.595126	0.495177	-0.290742	-1.37686	0.168555	MA0912.2	HOXD3	ENSG00000128652	Homeodomain	-0.308712	0.998366	CD4_8hr_vs_unstim	NS
MA1155.1.ZSCAN4	10583	0.214986	0.234958	0.535052	0.550348	0.0352677	0.208504	0.834836	MA1155.1	ZSCAN4	ENSG00000180532	C2H2 ZF	-0.00815442	0.999946	CD4_8hr_vs_unstim	NS
MA0800.1.EOMES	4619	0.232145	0.241	0.566523	0.513828	-0.04384	-0.176193	0.860143	MA0800.1	EOMES	ENSG00000163508	T-box	0.750675	0.121229	CD4_8hr_vs_unstim	NS
MA0496.3.MAFK	10693	0.222324	0.110115	0.738927	0.458637	-0.392499	-1.8717	0.0612482	MA0496.3	MAFK	ENSG00000198517	bZIP	1.60461	0.000445552	CD4_8hr_vs_unstim	expression
MA0077.1.SOX9	4535	0.454417	0.445024	0.49552	0.47971	-0.025203	-0.0855621	0.931815	MA0077.1	SOX9	ENSG00000125398	Sox	-0.227216	0.999946	CD4_8hr_vs_unstim	NS
MA0650.2.HOXA13	1719	0.744001	0.741741	0.6874	0.665227	-0.0244321	-0.0818131	0.934795	MA0650.2	HOXA13	ENSG00000106031	Homeodomain	-0.605328	0.729535	CD4_8hr_vs_unstim	NS
MA0787.1.POU3F2	7789	0.596119	0.514334	0.511804	0.439157	-0.154431	-0.713992	0.475232	MA0787.1	POU3F2	ENSG00000184486	Homeodomain,POU	-0.537435	0.780117	CD4_8hr_vs_unstim	NS
MA0713.1.PHOX2A	2148	0.516906	0.449065	0.403545	0.348264	-0.123122	-0.561734	0.574297	MA0713.1	PHOX2A	ENSG00000165462	Homeodomain	-0.410362	0.950349	CD4_8hr_vs_unstim	NS
MA0804.1.TBX19	2147	0.208896	0.258326	0.510053	0.504202	0.0435796	0.248924	0.80342	MA0804.1	TBX19	ENSG00000143178	T-box	-0.55717	0.426935	CD4_8hr_vs_unstim	NS
MA1464.1.ARNT2	72	0.839567	0.710628	1.09434	0.999099	-0.224185	-1.0532	0.29225	MA1464.1	ARNT2	ENSG00000172379	bHLH	-0.016533	0.999946	CD4_8hr_vs_unstim	NS
MA0648.1.GSC	2321	0.259866	0.207011	0.555241	0.525359	-0.0827373	-0.365348	0.714852	MA0648.1	GSC	ENSG00000133937	Homeodomain	0.580036	0.75827	CD4_8hr_vs_unstim	NS
MA1132.1.JUN::JUNB	1817	0.628713	0.475014	1.05503	0.822487	-0.386242	-1.84127	0.0655814	MA1132.1	JUN	ENSG00000177606	bZIP	1.18698	0.00984663	CD4_8hr_vs_unstim	expression
MA1132.1.JUN::JUNB	1817	0.628713	0.475014	1.05503	0.822487	-0.386242	-1.84127	0.0655814	MA1132.1	JUNB	ENSG00000171223	bZIP	1.9656	0.000149157	CD4_8hr_vs_unstim	expression
MA0046.2.HNF1A	4646	0.452067	0.356087	0.437051	0.343713	-0.189318	-0.883643	0.376889	MA0046.2	HNF1A	ENSG00000135100	Homeodomain	-0.178328	0.999946	CD4_8hr_vs_unstim	NS
MA0591.1.Bach1::Mafk	5551	0.15242	0.0370673	0.869586	0.616891	-0.368048	-1.7528	0.0796371	MA0591.1	BACH1	ENSG00000156273	bZIP	1.24098	0.00766634	CD4_8hr_vs_unstim	expression
MA1513.1.KLF15	15668	1.32835	1.47502	2.38862	2.61807	0.376128	1.86609	0.0620289	MA1513.1	KLF15	ENSG00000163884	C2H2 ZF	-0.247928	0.999946	CD4_8hr_vs_unstim	NS
MA0591.1.Bach1::Mafk	5551	0.15242	0.0370673	0.869586	0.616891	-0.368048	-1.7528	0.0796371	MA0591.1	MAFK	ENSG00000198517	bZIP	1.60461	0.000445552	CD4_8hr_vs_unstim	expression
MA0480.1.Foxo1	6920	0.516669	0.675372	0.581609	0.697303	0.274398	1.37138	0.170257	MA0480.1	FOXO1	ENSG00000150907	Forkhead	-0.506105	0.471225	CD4_8hr_vs_unstim	NS
MA0150.2.Nfe2l2	6779	0.21495	0.106777	0.692087	0.450056	-0.350205	-1.66603	0.095708	MA0150.2	NFE2L2	ENSG00000116044	bZIP	1.4923	0.00287024	CD4_8hr_vs_unstim	expression
MA0895.1.HMBOX1	2710	0.53664	0.511621	0.55837	0.525786	-0.0576022	-0.243117	0.807914	MA0895.1	HMBOX1	ENSG00000147421	Homeodomain	-0.228758	0.92957	CD4_8hr_vs_unstim	NS
MA0748.2.YY2	3478	0.0971981	0.025495	2.14745	2.30002	0.0808707	0.430268	0.667	MA0748.2	YY2	ENSG00000230797	C2H2 ZF	0.197428	0.999946	CD4_8hr_vs_unstim	NS
MA0124.2.Nkx3-1	4771	0.0979088	0.107815	0.555181	0.516658	-0.028617	-0.102164	0.918627	MA0124.2	NKX3-1	ENSG00000167034	Homeodomain	0.913775	0.151696	CD4_8hr_vs_unstim	NS
MA1523.1.MSANTD3	6490	0.550048	0.508942	0.712084	0.706036	-0.0471544	-0.19231	0.847499	MA1523.1	MSANTD3	ENSG00000066697	MADF	-0.574148	0.251352	CD4_8hr_vs_unstim	NS
MA1600.1.ZNF684	5022	0.470854	0.507892	0.803953	0.850746	0.0838314	0.444666	0.656561	MA1600.1	ZNF684	ENSG00000117010	C2H2 ZF	0.94492	0.0883539	CD4_8hr_vs_unstim	NS
MA1419.1.IRF4	6287	0.321785	0.255866	0.832193	0.613642	-0.284471	-1.34637	0.178185	MA1419.1	IRF4	ENSG00000137265	IRF	7.31805	2.56593e-10	CD4_8hr_vs_unstim	expression
MA0653.1.IRF9	9513	0.462815	0.37482	0.760306	0.566585	-0.281716	-1.33297	0.182542	MA0653.1	IRF9	ENSG00000213928	IRF	1.13199	0.00311463	CD4_8hr_vs_unstim	expression
MA1649.1.ZBTB12	4541	-0.461853	-0.483795	0.601988	0.604467	-0.0194631	-0.057649	0.954028	MA1649.1	ZBTB12	ENSG00000204366	C2H2 ZF	0.49757	0.387895	CD4_8hr_vs_unstim	NS
MA0807.1.TBX5	8554	0.0358369	0.0366806	0.655228	0.64517	-0.00921476	-0.00781196	0.993767	MA0807.1	TBX5	ENSG00000089225	T-box	0.0575786	0.999946	CD4_8hr_vs_unstim	NS
MA0845.1.FOXB1	2965	0.420589	0.378298	0.369478	0.340947	-0.0708219	-0.307404	0.758536	MA0845.1	FOXB1	ENSG00000171956	Forkhead	-0.404478	0.951999	CD4_8hr_vs_unstim	NS
MA1418.1.IRF3	9209	0.716915	0.600117	0.763382	0.621088	-0.259092	-1.22295	0.221348	MA1418.1	IRF3	ENSG00000126456	IRF	-0.860532	0.0406838	CD4_8hr_vs_unstim	expression
MA0111.1.Spz1	5014	-0.0424623	-0.029032	0.610246	0.633034	0.0362174	0.213122	0.831232	MA0111.1	SPZ1	ENSG00000164299	Unknown	0.413748	0.947734	CD4_8hr_vs_unstim	NS
MA1111.1.NR2F2	5071	0.205238	0.180829	0.571104	0.485106	-0.110407	-0.499905	0.617142	MA1111.1	NR2F2	ENSG00000185551	Nuclear receptor	-0.167481	0.999946	CD4_8hr_vs_unstim	NS
MA1143.1.FOSL1::JUND(var.2)	2025	1.0381	0.866181	0.972328	0.911048	-0.233201	-1.09704	0.272622	MA1143.1	FOSL1	ENSG00000175592	bZIP	6.82772	1.30627e-10	CD4_8hr_vs_unstim	expression
MA0821.1.HES5	1944	0.400063	0.393444	1.04265	1.10669	0.0574219	0.316238	0.751822	MA0821.1	HES5	ENSG00000197921	bHLH	-0.0120181	0.999946	CD4_8hr_vs_unstim	NS
MA0673.1.NKX2-8	5790	0.348052	0.370683	0.591313	0.591839	0.0231577	0.149613	0.88107	MA0673.1	NKX2-8	ENSG00000136327	Homeodomain	-0.273052	0.999946	CD4_8hr_vs_unstim	NS
MA0018.4.CREB1	2907	0.557106	0.500003	0.638731	0.613675	-0.0821597	-0.362539	0.716949	MA0018.4	CREB1	ENSG00000118260	bZIP	0.395684	0.633947	CD4_8hr_vs_unstim	NS
MA0017.2.NR2F1	4650	0.0890533	0.104508	0.644151	0.603687	-0.0250098	-0.0846222	0.932562	MA0017.2	NR2F1	ENSG00000175745	Nuclear receptor	-0.243955	0.999946	CD4_8hr_vs_unstim	NS
MA1500.1.HOXB6	1610	0.399957	0.339079	0.463282	0.393556	-0.130604	-0.598122	0.549758	MA1500.1	HOXB6	ENSG00000108511	Homeodomain	-0.162051	0.999946	CD4_8hr_vs_unstim	NS
MA0624.1.NFATC1	7052	0.260152	0.179169	0.589895	0.439994	-0.230884	-1.08578	0.277578	MA0624.1	NFATC1	ENSG00000131196	Rel	1.40022	0.00482782	CD4_8hr_vs_unstim	expression
MA0115.1.NR1H2::RXRA	3294	0.173887	0.176486	0.544908	0.517201	-0.0251078	-0.0850988	0.932183	MA0115.1	NR1H2	ENSG00000131408	Nuclear receptor	0.66451	0.200131	CD4_8hr_vs_unstim	NS
MA0115.1.NR1H2::RXRA	3294	0.173887	0.176486	0.544908	0.517201	-0.0251078	-0.0850988	0.932183	MA0115.1	RXRA	ENSG00000186350	Nuclear receptor	-0.477404	0.303767	CD4_8hr_vs_unstim	NS
MA1123.2.TWIST1	1555	0.326422	0.302052	0.509204	0.519097	-0.0144764	-0.0333993	0.973356	MA1123.2	TWIST1	ENSG00000122691	bHLH	-0.637866	0.721813	CD4_8hr_vs_unstim	NS
MA1592.1.ZNF274	3826	0.125628	0.142949	0.586247	0.577453	0.00852746	0.0784674	0.937456	MA1592.1	ZNF274	ENSG00000171606	C2H2 ZF	0.335104	0.695005	CD4_8hr_vs_unstim	NS
MA0628.1.POU6F1	1641	0.420807	0.308491	0.407632	0.315238	-0.204709	-0.958489	0.337816	MA0628.1	POU6F1	ENSG00000184271	Homeodomain	-1.04103	0.00876877	CD4_8hr_vs_unstim	expression
MA1525.1.NFATC4	6831	0.204867	0.12716	0.646214	0.519229	-0.204692	-0.958407	0.337858	MA1525.1	NFATC4	ENSG00000100968	Rel	-0.128811	0.999946	CD4_8hr_vs_unstim	NS
MA0078.1.Sox17	4555	-0.354545	-0.311465	0.486299	0.442193	-0.00102651	0.032007	0.974466	MA0078.1	SOX17	ENSG00000164736	Sox	0.0158827	0.999946	CD4_8hr_vs_unstim	NS
MA0857.1.Rarb	4187	0.19812	0.198973	0.479977	0.456812	-0.0223124	-0.0715051	0.942996	MA0857.1	RARB	ENSG00000077092	Nuclear receptor	-0.0383877	0.999946	CD4_8hr_vs_unstim	NS
MA0866.1.SOX21	1780	0.132576	0.154409	0.473949	0.466492	0.0143752	0.106904	0.914865	MA0866.1	SOX21	ENSG00000125285	Sox	0.141502	0.999946	CD4_8hr_vs_unstim	NS
MA0913.2.HOXD9	4636	0.285198	0.263779	0.426184	0.410465	-0.0371379	-0.143601	0.885816	MA0913.2	HOXD9	ENSG00000128709	Homeodomain	-0.0232987	0.999946	CD4_8hr_vs_unstim	NS
MA0672.1.NKX2-3	5740	0.320476	0.331785	0.564865	0.557869	0.00431329	0.0579742	0.953769	MA0672.1	NKX2-3	ENSG00000119919	Homeodomain	-0.104499	0.999946	CD4_8hr_vs_unstim	NS
MA1549.1.POU6F1(var.2)	4398	0.563711	0.441064	0.495091	0.416653	-0.201086	-0.94087	0.346771	MA1549.1	POU6F1	ENSG00000184271	Homeodomain	-1.04103	0.00876877	CD4_8hr_vs_unstim	expression
MA0669.1.NEUROG2	573	0.436598	0.322006	0.43943	0.420109	-0.133913	-0.614213	0.539075	MA0669.1	NEUROG2	ENSG00000178403	bHLH	-0.0767587	0.999946	CD4_8hr_vs_unstim	NS
MA1113.2.PBX2	5949	0.513183	0.40108	0.45654	0.367938	-0.200705	-0.93902	0.347721	MA1113.2	PBX2	ENSG00000204304	Homeodomain	-1.00371	0.0158791	CD4_8hr_vs_unstim	expression
MA0066.1.PPARG	2870	0.0111938	0.0351368	0.494982	0.452331	-0.0187086	-0.0539798	0.956951	MA0066.1	PPARG	ENSG00000132170	Nuclear receptor	-0.0190195	0.999946	CD4_8hr_vs_unstim	NS
MA0797.1.TGIF2	282	0.254345	0.144025	0.610063	0.532511	-0.187873	-0.876615	0.380696	MA0797.1	TGIF2	ENSG00000118707	Homeodomain	1.45991	0.00147805	CD4_8hr_vs_unstim	expression
MA0517.1.STAT1::STAT2	18787	0.551264	0.488999	0.718573	0.595342	-0.185495	-0.865052	0.38701	MA0517.1	STAT1	ENSG00000115415	STAT	3.92352	5.67663e-08	CD4_8hr_vs_unstim	expression
MA0887.1.EVX1	1047	0.542082	0.454346	0.585179	0.539927	-0.132987	-0.60971	0.542054	MA0887.1	EVX1	ENSG00000106038	Homeodomain	-0.693229	0.650961	CD4_8hr_vs_unstim	NS
MA0606.1.NFAT5	3882	0.464461	0.397892	0.542126	0.44248	-0.166214	-0.771292	0.440534	MA0606.1	NFAT5	ENSG00000102908	Rel	2.32776	7.95632e-05	CD4_8hr_vs_unstim	expression
MA1501.1.HOXB7	622	0.33347	0.274712	0.511833	0.421278	-0.149314	-0.689105	0.490757	MA1501.1	HOXB7	ENSG00000260027	Homeodomain	-0.688875	0.653462	CD4_8hr_vs_unstim	NS
MA0154.4.EBF1	6824	0.167751	0.151571	0.788293	0.767148	-0.037325	-0.14451	0.885098	MA0154.4	EBF1	ENSG00000164330	EBF1	-0.15183	0.999946	CD4_8hr_vs_unstim	NS
MA1105.2.GRHL2	4370	-0.139871	-0.104959	0.558693	0.591369	0.0675891	0.365681	0.714603	MA1105.2	GRHL2	ENSG00000083307	Grainyhead	-0.192893	0.999946	CD4_8hr_vs_unstim	NS
MA1567.1.TBX6	412	-0.176002	-0.104478	0.71299	0.747552	0.106087	0.552892	0.580338	MA1567.1	TBX6	ENSG00000149922	T-box	-0.533557	0.607988	CD4_8hr_vs_unstim	NS
MA1154.1.ZNF282	3710	0.603432	0.548936	0.693608	0.65151	-0.096594	-0.432732	0.665209	MA1154.1	ZNF282	ENSG00000170265	C2H2 ZF	0.647744	0.154137	CD4_8hr_vs_unstim	NS
MA0788.1.POU3F3	3881	0.466865	0.374116	0.424669	0.347996	-0.169421	-0.786888	0.431347	MA0788.1	POU3F3	ENSG00000198914	Homeodomain,POU	0.212898	0.999946	CD4_8hr_vs_unstim	NS
MA0607.1.Bhlha15	3694	0.50589	0.457971	0.391417	0.353009	-0.0863269	-0.382804	0.701865	MA0607.1	BHLHA15	ENSG00000180535	bHLH	0.664441	0.651764	CD4_8hr_vs_unstim	NS
MA0080.5.SPI1	19647	0.754437	0.779148	0.716709	0.744191	0.0521926	0.290809	0.771198	MA0080.5	SPI1	ENSG00000066336	Ets	-0.473184	0.758578	CD4_8hr_vs_unstim	NS
MA1485.1.FERD3L	5595	-0.0319663	-0.0592431	1.04854	1.14734	0.071522	0.384806	0.700381	MA1485.1	FERD3L	ENSG00000146618	bHLH	-0.663333	0.823337	CD4_8hr_vs_unstim	NS
MA1121.1.TEAD2	1529	0.398333	0.382193	0.508635	0.467327	-0.0574481	-0.242368	0.808495	MA1121.1	TEAD2	ENSG00000074219	TEA	-0.247559	0.999946	CD4_8hr_vs_unstim	NS
MA1569.1.TFAP2E	8940	0.107884	0.115289	1.52066	1.61348	0.100227	0.524396	0.600003	MA1569.1	TFAP2E	ENSG00000116819	AP-2	-0.430292	0.798222	CD4_8hr_vs_unstim	NS
MA0816.1.Ascl2	1892	-0.869983	-1.06574	0.646673	0.76322	-0.0792075	-0.348183	0.727703	MA0816.1	ASCL2	ENSG00000183734	bHLH	0.530204	0.733553	CD4_8hr_vs_unstim	NS
MA0258.2.ESR2	4375	0.0535289	0.0398174	0.679761	0.672889	-0.0205835	-0.0630977	0.949689	MA0258.2	ESR2	ENSG00000140009	Nuclear receptor	-0.101009	0.999946	CD4_8hr_vs_unstim	NS
MA1503.1.HOXB9	2132	0.355589	0.302077	0.551473	0.443435	-0.16155	-0.748609	0.454093	MA1503.1	HOXB9	ENSG00000170689	Homeodomain	1.41935	0.0317548	CD4_8hr_vs_unstim	expression
MA0753.2.ZNF740	22040	1.92513	2.11855	1.53902	1.64642	0.300825	1.49989	0.133642	MA0753.2	ZNF740	ENSG00000139651	C2H2 ZF	-0.288316	0.806152	CD4_8hr_vs_unstim	NS
MA0778.1.NFKB2	7216	-0.296088	-0.233618	0.84866	0.643183	-0.143007	-0.658436	0.510258	MA0778.1	NFKB2	ENSG00000077150	Rel	3.27014	4.77318e-07	CD4_8hr_vs_unstim	expression
MA1139.1.FOSL2::JUNB(var.2)	515	0.509652	0.383995	0.753799	0.752024	-0.127432	-0.582695	0.560099	MA1139.1	FOSL2	ENSG00000075426	bZIP	4.77059	2.59666e-09	CD4_8hr_vs_unstim	expression
MA1504.1.HOXC4	3046	0.660482	0.476413	0.474812	0.361408	-0.297474	-1.4096	0.158658	MA1504.1	HOXC4	ENSG00000198353	Homeodomain	-0.487895	0.983337	CD4_8hr_vs_unstim	NS
MA1124.1.ZNF24	8794	0.658705	0.494954	0.515915	0.399922	-0.279744	-1.32338	0.185709	MA1124.1	ZNF24	ENSG00000172466	C2H2 ZF	0.879116	0.0803843	CD4_8hr_vs_unstim	NS
MA1139.1.FOSL2::JUNB(var.2)	515	0.509652	0.383995	0.753799	0.752024	-0.127432	-0.582695	0.560099	MA1139.1	JUNB	ENSG00000171223	bZIP	1.9656	0.000149157	CD4_8hr_vs_unstim	expression
MA0159.1.RARA::RXRA	2115	0.415315	0.429436	0.725838	0.770068	0.0583504	0.320754	0.748397	MA0159.1	RXRA	ENSG00000186350	Nuclear receptor	-0.477404	0.303767	CD4_8hr_vs_unstim	NS
MA0151.1.Arid3a	15069	0.449319	0.383001	0.432255	0.375562	-0.123011	-0.561194	0.574665	MA0151.1	ARID3A	ENSG00000116017	ARID/BRIGHT	-0.921835	0.0170789	CD4_8hr_vs_unstim	expression
MA0710.1.NOTO	851	0.544096	0.439875	0.516235	0.453014	-0.167443	-0.777266	0.437002	MA0710.1	NOTO	ENSG00000214513	Homeodomain	-0.0974014	0.999946	CD4_8hr_vs_unstim	NS
MA0695.1.ZBTB7C	4051	0.641058	0.681526	1.15072	1.20359	0.0933462	0.490936	0.623471	MA0695.1	ZBTB7C	ENSG00000184828	C2H2 ZF	-0.0414526	0.999946	CD4_8hr_vs_unstim	NS
MA1120.1.SOX13	871	0.0698217	0.00299913	0.563787	0.525988	-0.104622	-0.47177	0.637091	MA1120.1	SOX13	ENSG00000143842	Sox	-0.0800309	0.999946	CD4_8hr_vs_unstim	NS
MA0619.1.LIN54	7967	0.46763	0.408736	0.495657	0.43289	-0.121661	-0.554633	0.579146	MA0619.1	LIN54	ENSG00000189308	TCR/CxC	-0.850042	0.0345349	CD4_8hr_vs_unstim	expression
MA0883.1.Dmbx1	1900	0.363816	0.31812	0.460023	0.419377	-0.0863413	-0.382874	0.701813	MA0883.1	DMBX1	ENSG00000197587	Homeodomain	-0.105114	0.999946	CD4_8hr_vs_unstim	NS
MA0872.1.TFAP2A(var.3)	1223	0.49809	0.569391	1.10053	1.18032	0.151093	0.771755	0.440259	MA0872.1	TFAP2A	ENSG00000137203	AP-2	-0.134337	0.999946	CD4_8hr_vs_unstim	NS
MA0507.1.POU2F2	8564	0.633434	0.567495	0.521854	0.467955	-0.119837	-0.545762	0.58523	MA0507.1	POU2F2	ENSG00000028277	Homeodomain,POU	2.51685	1.46166e-05	CD4_8hr_vs_unstim	expression
MA1585.1.ZKSCAN1	4517	0.35773	0.369029	0.653674	0.642837	0.00046128	0.0392421	0.968697	MA1585.1	ZKSCAN1	ENSG00000106261	C2H2 ZF	0.340042	0.769415	CD4_8hr_vs_unstim	NS
MA0659.2.MAFG	5453	0.107741	0.0608639	0.496219	0.424863	-0.118233	-0.537959	0.590605	MA0659.2	MAFG	ENSG00000197063	bZIP	2.38945	1.17391e-05	CD4_8hr_vs_unstim	expression
MA0486.2.HSF1	590	0.205762	0.129499	0.537486	0.499771	-0.113979	-0.517274	0.604965	MA0486.2	HSF1	ENSG00000185122	HSF	0.987574	0.0358828	CD4_8hr_vs_unstim	expression
MA1112.2.NR4A1	6746	0.199742	0.184629	0.619958	0.521856	-0.113215	-0.513561	0.607559	MA1112.2	NR4A1	ENSG00000123358	Nuclear receptor	6.49951	5.4452e-11	CD4_8hr_vs_unstim	expression
MA0831.2.TFE3	4949	1.17466	1.24885	1.2467	1.3124	0.139888	0.717268	0.473209	MA0831.2	TFE3	ENSG00000068323	bHLH	0.506021	0.313792	CD4_8hr_vs_unstim	NS
MA1653.1.ZNF148	21365	1.96187	2.15241	1.85701	2.0235	0.357029	1.77321	0.0761936	MA1653.1	ZNF148	ENSG00000163848	NA	0.0532413	0.999946	CD4_8hr_vs_unstim	NS
MA0747.1.SP8	5032	0.635021	0.686646	1.11258	1.18802	0.127071	0.654937	0.512508	MA0747.1	SP8	ENSG00000164651	C2H2 ZF	0.0977234	0.999946	CD4_8hr_vs_unstim	NS
MA1110.1.NR1H4	3204	-0.0646603	-0.0827212	0.464813	0.4404	-0.0424736	-0.169548	0.865366	MA1110.1	NR1H4	ENSG00000012504	Nuclear receptor	-0.360304	0.986673	CD4_8hr_vs_unstim	NS
MA0754.1.CUX1	1101	0.505804	0.47084	0.455758	0.430845	-0.0598779	-0.254184	0.799353	MA0754.1	CUX1	ENSG00000257923	CUT,Homeodomain	0.000668764	0.999946	CD4_8hr_vs_unstim	NS
MA0892.1.GSX1	384	0.399239	0.27569	0.406987	0.338327	-0.192208	-0.897699	0.369346	MA0892.1	GSX1	ENSG00000169840	Homeodomain	-0.211516	0.999946	CD4_8hr_vs_unstim	NS
MA0734.2.GLI2	831	1.10249	1.09933	1.10262	1.13218	0.0263966	0.165364	0.868657	MA0734.2	GLI2	ENSG00000074047	C2H2 ZF	-0.266789	0.974766	CD4_8hr_vs_unstim	NS
MA0818.1.BHLHE22	1242	0.512663	0.4257	0.447188	0.388684	-0.145467	-0.670401	0.502602	MA0818.1	BHLHE22	ENSG00000180828	bHLH	0.0194833	0.999946	CD4_8hr_vs_unstim	NS
MA0652.1.IRF8	2325	-0.018207	0.00893068	0.717897	0.579514	-0.111246	-0.503984	0.614273	MA0652.1	IRF8	ENSG00000140968	IRF	5.79075	9.25293e-09	CD4_8hr_vs_unstim	expression
MA0050.2.IRF1	34895	0.754368	0.707765	0.602042	0.538773	-0.109873	-0.497306	0.618973	MA0050.2	IRF1	ENSG00000125347	IRF	3.14059	5.70164e-07	CD4_8hr_vs_unstim	expression
MA0605.2.ATF3	955	0.359325	0.283087	0.597586	0.571312	-0.102512	-0.461509	0.644433	MA0605.2	ATF3	ENSG00000162772	bZIP	3.05994	1.19663e-07	CD4_8hr_vs_unstim	expression
MA0495.3.MAFF	4913	0.0873154	0.0596899	0.460364	0.392947	-0.0950423	-0.425186	0.670701	MA0495.3	MAFF	ENSG00000185022	bZIP	1.32742	0.00220846	CD4_8hr_vs_unstim	expression
MA1570.1.TFAP4(var.2)	5821	0.350456	0.288599	0.487269	0.454088	-0.0950378	-0.425165	0.670717	MA1570.1	TFAP4	ENSG00000090447	bHLH	1.2698	0.0038844	CD4_8hr_vs_unstim	expression
MA1588.1.ZNF136	3504	0.279503	0.269039	0.506106	0.466672	-0.0498973	-0.205649	0.837065	MA1588.1	ZNF136	ENSG00000196646	C2H2 ZF	0.443542	0.386068	CD4_8hr_vs_unstim	NS
MA0508.3.PRDM1	17205	0.581932	0.552272	0.651205	0.589149	-0.0917168	-0.409015	0.682529	MA0508.3	PRDM1	ENSG00000057657	C2H2 ZF	1.89789	0.000154747	CD4_8hr_vs_unstim	expression
MA0600.2.RFX2	3570	0.427307	0.48245	1.08095	1.25999	0.234186	1.17583	0.239662	MA0600.2	RFX2	ENSG00000087903	RFX	-0.269943	0.799112	CD4_8hr_vs_unstim	NS
MA0885.1.Dlx2	1054	0.360969	0.314002	0.37875	0.327112	-0.0986046	-0.442509	0.658121	MA0885.1	DLX2	ENSG00000115844	Homeodomain	-0.518457	0.880332	CD4_8hr_vs_unstim	NS
MA0838.1.CEBPG	287	0.371012	0.297306	0.737621	0.723403	-0.0879227	-0.390564	0.696119	MA0838.1	CEBPG	ENSG00000153879	bZIP	1.65323	0.000484987	CD4_8hr_vs_unstim	expression
MA1636.1.CEBPG(var.2)	5559	0.546207	0.500819	0.497227	0.458734	-0.0838815	-0.370912	0.710703	MA1636.1	CEBPG	ENSG00000153879	bZIP	1.65323	0.000484987	CD4_8hr_vs_unstim	expression
MA1542.1.OSR1	3776	-0.134815	-0.142718	0.719816	0.759263	0.0315445	0.190398	0.848997	MA1542.1	OSR1	ENSG00000143867	C2H2 ZF	-0.0564075	0.999946	CD4_8hr_vs_unstim	NS
MA1552.1.RARB(var.3)	290	0.193146	0.242153	0.873988	0.837538	0.0125571	0.0980633	0.921882	MA1552.1	RARB	ENSG00000077092	Nuclear receptor	-0.0383877	0.999946	CD4_8hr_vs_unstim	NS
MA1126.1.FOS::JUN(var.2)	3406	0.729299	0.656787	1.11749	1.11373	-0.0762647	-0.333872	0.738476	MA1126.1	FOS	ENSG00000170345	bZIP	3.66952	1.24821e-08	CD4_8hr_vs_unstim	expression
MA1126.1.FOS::JUN(var.2)	3406	0.729299	0.656787	1.11749	1.11373	-0.0762647	-0.333872	0.738476	MA1126.1	JUN	ENSG00000177606	bZIP	1.18698	0.00984663	CD4_8hr_vs_unstim	expression
MA0598.3.EHF	15703	0.730371	0.869351	0.89964	1.07307	0.312409	1.55622	0.119655	MA0598.3	EHF	ENSG00000135373	Ets	-0.175207	0.999946	CD4_8hr_vs_unstim	NS
MA1421.1.TCF7L1	8654	0.138572	0.139254	0.539442	0.544592	0.00583155	0.0653574	0.947889	MA1421.1	TCF7L1	ENSG00000152284	Sox	-0.190462	0.999946	CD4_8hr_vs_unstim	NS
MA1136.1.FOSB::JUNB(var.2)	248	1.39385	1.31922	1.54298	1.54509	-0.0725178	-0.315651	0.752268	MA1136.1	FOSB	ENSG00000125740	bZIP	3.74162	6.80408e-08	CD4_8hr_vs_unstim	expression
MA1136.1.FOSB::JUNB(var.2)	248	1.39385	1.31922	1.54298	1.54509	-0.0725178	-0.315651	0.752268	MA1136.1	JUNB	ENSG00000171223	bZIP	1.9656	0.000149157	CD4_8hr_vs_unstim	expression
MA0101.1.REL	2394	-0.754384	-0.731286	0.923971	0.831172	-0.0697012	-0.301954	0.762687	MA0101.1	REL	ENSG00000162924	Rel	4.95707	6.61597e-09	CD4_8hr_vs_unstim	expression
MA0025.2.NFIL3	4645	0.651287	0.620795	0.501278	0.465665	-0.0661052	-0.284467	0.776052	MA0025.2	NFIL3	ENSG00000165030	bZIP	2.19291	0.000130014	CD4_8hr_vs_unstim	expression
MA0791.1.POU4F3	5892	0.495273	0.385804	0.418128	0.326012	-0.201585	-0.943299	0.345528	MA0791.1	POU4F3	ENSG00000091010	Homeodomain,POU	-0.45301	0.925079	CD4_8hr_vs_unstim	NS
MA0160.1.NR4A2	1969	0.0809228	0.0640341	0.538607	0.48998	-0.0655164	-0.281603	0.778248	MA0160.1	NR4A2	ENSG00000153234	Nuclear receptor	5.67081	2.12824e-10	CD4_8hr_vs_unstim	expression
MA0763.1.ETV3	618	-0.40399	-0.394858	0.775307	0.80538	0.039205	0.22765	0.819918	MA0763.1	ETV3	ENSG00000117036	Ets	0.787746	0.0830824	CD4_8hr_vs_unstim	NS
MA1625.1.Stat5b	5230	-0.222232	-0.240271	0.699768	0.668395	-0.0494118	-0.203288	0.83891	MA1625.1	STAT5B	ENSG00000173757	STAT	0.418571	0.639373	CD4_8hr_vs_unstim	NS
MA1536.1.NR2C2(var.2)	5350	0.137389	0.157222	0.590887	0.53862	-0.0324341	-0.120726	0.903908	MA1536.1	NR2C2	ENSG00000177463	Nuclear receptor	-0.630603	0.182926	CD4_8hr_vs_unstim	NS
MA0639.1.DBP	686	0.342896	0.307186	0.42003	0.393187	-0.0625525	-0.26719	0.789323	MA0639.1	DBP	ENSG00000105516	bZIP	-2.29508	2.93983e-06	CD4_8hr_vs_unstim	expression
MA0690.1.TBX21	5971	0.164841	0.173027	0.593025	0.525427	-0.0594117	-0.251917	0.801105	MA0690.1	TBX21	ENSG00000073861	T-box	5.37144	2.32013e-08	CD4_8hr_vs_unstim	expression
MA1652.1.ZKSCAN5	17174	1.08323	1.16812	0.980375	1.04254	0.147049	0.752091	0.451996	MA1652.1	ZKSCAN5	ENSG00000196652	C2H2 ZF	0.220322	0.907819	CD4_8hr_vs_unstim	NS
MA0108.2.TBP	2776	0.293543	0.269059	0.536453	0.502193	-0.0587442	-0.248671	0.803615	MA0108.2	TBP	ENSG00000112592	TBP	0.97233	0.0284758	CD4_8hr_vs_unstim	expression
MA0067.1.Pax2	1360	-0.402641	-0.478171	1.5517	1.55888	-0.0683444	-0.295356	0.767722	MA0067.1	PAX2	ENSG00000075891	Homeodomain,Paired box	0.0669538	0.999946	CD4_8hr_vs_unstim	NS
MA0833.2.ATF4	5487	0.572067	0.546281	0.553211	0.523367	-0.0556306	-0.23353	0.81535	MA0833.2	ATF4	ENSG00000128272	bZIP	2.23971	0.000100577	CD4_8hr_vs_unstim	expression
MA0131.2.HINFP	2793	-0.390264	-0.392181	2.13109	2.34814	0.215125	1.08314	0.278747	MA0131.2	HINFP	ENSG00000172273	C2H2 ZF	-0.371863	0.541597	CD4_8hr_vs_unstim	NS
MA0122.3.Nkx3-2	4211	0.262261	0.209692	0.454983	0.409812	-0.0977398	-0.438304	0.661166	MA0122.3	NKX3-2	ENSG00000109705	Homeodomain	-0.126114	0.999946	CD4_8hr_vs_unstim	NS
MA0072.1.RORA(var.2)	3738	0.310203	0.285573	0.478278	0.447475	-0.0554339	-0.232573	0.816093	MA0072.1	RORA	ENSG00000069667	Nuclear receptor	-1.13534	0.00797213	CD4_8hr_vs_unstim	expression
MA0855.1.RXRB	590	0.127178	0.131092	0.597136	0.584407	-0.0088155	-0.00587037	0.995316	MA0855.1	RXRB	ENSG00000204231	Nuclear receptor	0.259109	0.89418	CD4_8hr_vs_unstim	NS
MA0633.1.Twist2	3287	0.37851	0.341142	0.421966	0.367917	-0.0914164	-0.407554	0.683601	MA0633.1	TWIST2	ENSG00000233608	bHLH	-0.240672	0.999946	CD4_8hr_vs_unstim	NS
MA0063.2.NKX2-5	5560	0.381913	0.365146	0.525312	0.503367	-0.0387123	-0.151257	0.879773	MA0063.2	NKX2-5	ENSG00000183072	Homeodomain	-0.476655	0.950245	CD4_8hr_vs_unstim	NS
MA1574.1.THRB	4268	0.351888	0.378742	0.839666	0.841891	0.0290798	0.178412	0.858399	MA1574.1	THRB	ENSG00000151090	Nuclear receptor	-0.183069	0.999946	CD4_8hr_vs_unstim	NS
MA1115.1.POU5F1	8581	0.685222	0.645298	0.551789	0.514796	-0.0769159	-0.337039	0.736088	MA1115.1	POU5F1	ENSG00000204531	Homeodomain,POU	0.21276	0.999946	CD4_8hr_vs_unstim	NS
MA0117.2.Mafb	4886	-0.119049	-0.134124	0.538241	0.498884	-0.0544319	-0.2277	0.819879	MA0117.2	MAFB	ENSG00000204103	bZIP	-1.37244	0.0236059	CD4_8hr_vs_unstim	expression
MA0520.1.Stat6	6106	0.289305	0.253816	0.538268	0.519427	-0.0543299	-0.227204	0.820265	MA0520.1	STAT6	ENSG00000166888	STAT	1.55539	0.00299413	CD4_8hr_vs_unstim	expression
MA0696.1.ZIC1	5735	0.0253508	0.00126226	1.22396	1.29345	0.0453946	0.25775	0.7966	MA0696.1	ZIC1	ENSG00000152977	C2H2 ZF	-0.211001	0.999946	CD4_8hr_vs_unstim	NS
MA1117.1.RELB	4551	-0.19196	-0.119401	0.759417	0.635465	-0.0513924	-0.212919	0.83139	MA1117.1	RELB	ENSG00000104856	Rel	4.05261	1.76531e-08	CD4_8hr_vs_unstim	expression
MA0694.1.ZBTB7B	794	0.551752	0.587689	0.992026	1.01432	0.0582306	0.320171	0.748839	MA0694.1	ZBTB7B	ENSG00000160685	C2H2 ZF	-0.0314841	0.999946	CD4_8hr_vs_unstim	NS
MA1632.1.ATF2	6292	0.815357	0.772004	0.985892	0.991417	-0.0378277	-0.146955	0.883167	MA1632.1	ATF2	ENSG00000115966	bZIP	0.424417	0.552825	CD4_8hr_vs_unstim	NS
MA0785.1.POU2F1	7141	0.604563	0.526721	0.52103	0.450188	-0.148684	-0.686042	0.492686	MA0785.1	POU2F1	ENSG00000143190	Homeodomain,POU	0.0993838	0.999946	CD4_8hr_vs_unstim	NS
MA0745.2.SNAI2	2992	0.258817	0.271238	0.520433	0.510928	0.0029164	0.0511812	0.959181	MA0745.2	SNAI2	ENSG00000019549	C2H2 ZF	-0.29839	0.999946	CD4_8hr_vs_unstim	NS
MA1539.1.NR2F6(var.3)	3092	-0.0164479	-0.0289959	0.603081	0.565464	-0.050165	-0.20695	0.836049	MA1539.1	NR2F6	ENSG00000160113	Nuclear receptor	1.78621	7.36161e-05	CD4_8hr_vs_unstim	expression
MA0688.1.TBX2	5356	0.205564	0.207729	0.591594	0.537045	-0.0523848	-0.217745	0.827628	MA0688.1	TBX2	ENSG00000121068	T-box	-0.0783083	0.999946	CD4_8hr_vs_unstim	NS
MA1602.1.ZSCAN29	1878	-0.0168641	0.0408487	0.717	0.790612	0.131325	0.675627	0.499278	MA1602.1	ZSCAN29	ENSG00000140265	C2H2 ZF,MADF	0.458775	0.393276	CD4_8hr_vs_unstim	NS
MA1597.1.ZNF528	5629	0.413847	0.46442	0.679029	0.722728	0.0942723	0.495439	0.62029	MA1597.1	ZNF528	ENSG00000167555	C2H2 ZF	-0.134898	0.999946	CD4_8hr_vs_unstim	NS
MA1470.1.BACH2(var.2)	1675	0.564504	0.533493	0.806569	0.790025	-0.0475551	-0.194259	0.845973	MA1470.1	BACH2	ENSG00000112182	bZIP	2.37439	7.32258e-05	CD4_8hr_vs_unstim	expression
MA0528.2.ZNF263	22646	1.7503	1.94961	1.54776	1.70648	0.358019	1.77802	0.0754002	MA0528.2	ZNF263	ENSG00000006194	C2H2 ZF	0.773648	0.101542	CD4_8hr_vs_unstim	NS
MA0905.1.HOXC10	437	0.491969	0.375444	0.477836	0.386404	-0.207957	-0.974283	0.329916	MA0905.1	HOXC10	ENSG00000180818	Homeodomain	-0.073696	0.999946	CD4_8hr_vs_unstim	NS
MA1420.1.IRF5	1667	0.236315	0.207249	0.782581	0.778125	-0.0335227	-0.12602	0.899716	MA1420.1	IRF5	ENSG00000128604	IRF	0.292038	0.847215	CD4_8hr_vs_unstim	NS
MA0729.1.RARA	3730	0.275928	0.252915	0.469395	0.446327	-0.0460809	-0.18709	0.85159	MA0729.1	RARA	ENSG00000131759	Nuclear receptor	1.77226	0.00022128	CD4_8hr_vs_unstim	expression
MA1545.1.OVOL2	357	-0.327038	-0.464195	1.27068	1.27029	-0.137541	-0.631857	0.52748	MA1545.1	OVOL2	ENSG00000125850	C2H2 ZF	-0.624957	0.713721	CD4_8hr_vs_unstim	NS
MA0130.1.ZNF354C	11047	0.5914	0.58771	0.539584	0.534199	-0.0090754	-0.00713428	0.994308	MA0130.1	ZNF354C	ENSG00000177932	C2H2 ZF	-0.034188	0.999946	CD4_8hr_vs_unstim	NS
MA1601.1.ZNF75D	10214	0.656035	0.652335	0.764123	0.722246	-0.0455768	-0.184639	0.853513	MA1601.1	ZNF75D	ENSG00000186376	C2H2 ZF	-1.34666	0.0004347	CD4_8hr_vs_unstim	expression
MA0137.3.STAT1	2658	0.096359	0.0692029	0.571133	0.554931	-0.0433578	-0.173848	0.861985	MA0137.3	STAT1	ENSG00000115415	STAT	3.92352	5.67663e-08	CD4_8hr_vs_unstim	expression
MA1532.1.NR1D2	1123	0.265936	0.291959	0.530525	0.53458	0.0300773	0.183263	0.854591	MA1532.1	NR1D2	ENSG00000174738	Nuclear receptor	-0.518096	0.255131	CD4_8hr_vs_unstim	NS
MA0519.1.Stat5a::Stat5b	6849	-0.290844	-0.291479	0.611714	0.570378	-0.0419716	-0.167107	0.867286	MA0519.1	STAT5A	ENSG00000126561	STAT	3.35087	1.7114e-06	CD4_8hr_vs_unstim	expression
MA0663.1.MLX	213	0.723482	0.641773	1.33623	1.37836	-0.0395755	-0.155454	0.876463	MA0663.1	MLX	ENSG00000108788	bHLH	0.957829	0.0517864	CD4_8hr_vs_unstim	NS
MA0116.1.Znf423	4961	0.596261	0.606519	0.901822	0.927667	0.0361025	0.212563	0.831668	MA0116.1	ZNF423	ENSG00000102935	C2H2 ZF	-0.335234	0.964869	CD4_8hr_vs_unstim	NS
MA0625.1.NFATC3	602	0.0170812	0.0486182	0.512191	0.411217	-0.0694368	-0.300668	0.763667	MA0625.1	NFATC3	ENSG00000072736	Rel	-0.290905	0.869719	CD4_8hr_vs_unstim	NS
MA1147.1.NR4A2::RXRA	837	0.212379	0.175989	0.790831	0.790979	-0.0362425	-0.139246	0.889256	MA1147.1	NR4A2	ENSG00000153234	Nuclear receptor	5.67081	2.12824e-10	CD4_8hr_vs_unstim	expression
MA0707.1.MNX1	1142	0.423232	0.342559	0.380639	0.325161	-0.136152	-0.625101	0.531905	MA0707.1	MNX1	ENSG00000130675	Homeodomain	-0.0471005	0.999946	CD4_8hr_vs_unstim	NS
MA1583.1.ZFP57	1370	-2.1035	-2.27314	1.97501	2.16704	0.0223963	0.145911	0.883992	MA1583.1	ZFP57	ENSG00000204644	C2H2 ZF	0.158538	0.999946	CD4_8hr_vs_unstim	NS
MA1099.2.HES1	5140	1.76624	1.90282	2.34311	2.48668	0.280144	1.39932	0.161717	MA1099.2	HES1	ENSG00000114315	bHLH	0.496222	0.826541	CD4_8hr_vs_unstim	NS
MA0488.1.JUN	6662	0.868088	0.834237	0.923319	0.92177	-0.0353999	-0.135149	0.892494	MA0488.1	JUN	ENSG00000177606	bZIP	1.18698	0.00984663	CD4_8hr_vs_unstim	expression
MA0035.4.GATA1	4443	0.520752	0.494016	0.490174	0.475789	-0.0411213	-0.162972	0.870541	MA0035.4	GATA1	ENSG00000102145	GATA	0.100458	0.999946	CD4_8hr_vs_unstim	NS
MA0781.1.PAX9	455	0.628243	0.677846	0.990627	1.02525	0.0842257	0.446584	0.655176	MA0781.1	PAX9	ENSG00000198807	Paired box	-0.015185	0.999946	CD4_8hr_vs_unstim	NS
MA1472.1.BHLHA15(var.2)	11131	-0.703152	-0.781266	0.66606	0.718895	-0.0252793	-0.0859328	0.93152	MA1472.1	BHLHA15	ENSG00000180535	bHLH	0.664441	0.651764	CD4_8hr_vs_unstim	NS
MA0523.1.TCF7L2	9099	0.268074	0.266018	0.573616	0.60158	0.0259095	0.162996	0.870522	MA0523.1	TCF7L2	ENSG00000148737	Sox	0.469516	0.420004	CD4_8hr_vs_unstim	NS
MA1148.1.PPARA::RXRA	4166	0.391885	0.385481	0.594484	0.565654	-0.0352339	-0.134342	0.893132	MA1148.1	PPARA	ENSG00000186951	Nuclear receptor	-0.960651	0.0106712	CD4_8hr_vs_unstim	expression
MA0519.1.Stat5a::Stat5b	6849	-0.290844	-0.291479	0.611714	0.570378	-0.0419716	-0.167107	0.867286	MA0519.1	STAT5B	ENSG00000173757	STAT	0.418571	0.639373	CD4_8hr_vs_unstim	NS
MA1463.1.ARGFX	528	0.566602	0.556073	0.445781	0.414636	-0.041675	-0.165664	0.868421	MA1463.1	ARGFX	ENSG00000186103	Homeodomain	-0.420594	0.996717	CD4_8hr_vs_unstim	NS
MA0596.1.SREBF2	6014	0.645843	0.622625	0.665029	0.655862	-0.0323849	-0.120487	0.904097	MA0596.1	SREBF2	ENSG00000198911	bHLH	1.80508	0.000434517	CD4_8hr_vs_unstim	expression
MA1494.1.HNF4A(var.2)	2331	0.301637	0.306728	0.632751	0.616933	-0.0107272	-0.015167	0.987899	MA1494.1	HNF4A	ENSG00000101076	Nuclear receptor	-0.29182	0.999946	CD4_8hr_vs_unstim	NS
MA0483.1.Gfi1b	8362	-0.144684	-0.133443	0.577076	0.623793	0.0579575	0.318843	0.749846	MA0483.1	GFI1B	ENSG00000165702	C2H2 ZF	-0.208243	0.999946	CD4_8hr_vs_unstim	NS
MA0637.1.CENPB	835	1.49593	1.67942	1.7785	1.92079	0.325768	1.62119	0.104977	MA0637.1	CENPB	ENSG00000125817	CENPB	0.946194	0.057312	CD4_8hr_vs_unstim	NS
MA1131.1.FOSL2::JUN(var.2)	1559	0.830026	0.804511	0.862507	0.863258	-0.0247637	-0.0834256	0.933513	MA1131.1	FOSL2	ENSG00000075426	bZIP	4.77059	2.59666e-09	CD4_8hr_vs_unstim	expression
MA0718.1.RAX	133	0.516978	0.332974	0.432384	0.327635	-0.288754	-1.36719	0.171565	MA0718.1	RAX	ENSG00000134438	Homeodomain	-0.521708	0.76498	CD4_8hr_vs_unstim	NS
MA1468.1.ATOH7	2141	0.429006	0.406019	0.438144	0.426192	-0.0349395	-0.13291	0.894265	MA1468.1	ATOH7	ENSG00000179774	bHLH	-0.523262	0.859807	CD4_8hr_vs_unstim	NS
MA1560.1.SOHLH2	1721	1.03047	1.03558	1.95244	2.0063	0.0589721	0.323777	0.746107	MA1560.1	SOHLH2	ENSG00000120669	bHLH	-0.355904	0.987819	CD4_8hr_vs_unstim	NS
MA1640.1.MEIS2(var.2)	4730	0.516095	0.398703	0.465781	0.372463	-0.210709	-0.987668	0.323315	MA1640.1	MEIS2	ENSG00000134138	Homeodomain	-0.245117	0.999946	CD4_8hr_vs_unstim	NS
MA1480.1.DPRX	2418	0.0960958	0.0717709	0.477842	0.46227	-0.0398973	-0.15702	0.875229	MA1480.1	DPRX	ENSG00000204595	Homeodomain	-0.235997	0.999946	CD4_8hr_vs_unstim	NS
MA1131.1.FOSL2::JUN(var.2)	1559	0.830026	0.804511	0.862507	0.863258	-0.0247637	-0.0834256	0.933513	MA1131.1	JUN	ENSG00000177606	bZIP	1.18698	0.00984663	CD4_8hr_vs_unstim	expression
MA0464.2.BHLHE40	144	0.518421	0.569419	0.916585	0.842662	-0.0229247	-0.0744827	0.940626	MA0464.2	BHLHE40	ENSG00000134107	bHLH	4.89588	3.06095e-09	CD4_8hr_vs_unstim	expression
MA0608.1.Creb3l2	3176	0.93278	0.955803	1.70529	1.78347	0.101198	0.529118	0.596724	MA0608.1	CREB3L2	ENSG00000182158	bZIP	0.664304	0.182383	CD4_8hr_vs_unstim	NS
MA0834.1.ATF7	2853	0.999004	0.966872	1.59312	1.652	0.0267422	0.167044	0.867335	MA0834.1	ATF7	ENSG00000170653	bZIP,C2H2 ZF	-0.0631446	0.999946	CD4_8hr_vs_unstim	NS
MA0907.1.HOXC13	2032	0.248989	0.251669	0.496575	0.452553	-0.0413421	-0.164045	0.869695	MA0907.1	HOXC13	ENSG00000123364	Homeodomain	0.0702454	0.999946	CD4_8hr_vs_unstim	NS
MA0677.1.Nr2f6	4084	-0.0173524	-0.0108241	0.660927	0.632013	-0.0223856	-0.0718611	0.942712	MA0677.1	NR2F6	ENSG00000160113	Nuclear receptor	1.78621	7.36161e-05	CD4_8hr_vs_unstim	expression
MA0623.2.NEUROG1	804	0.619768	0.584451	0.501903	0.470556	-0.0666641	-0.287185	0.773971	MA0623.2	NEUROG1	ENSG00000181965	bHLH	-0.200362	0.999946	CD4_8hr_vs_unstim	NS
MA0819.1.CLOCK	374	0.0345806	0.0649898	0.628213	0.576837	-0.0209667	-0.0649611	0.948205	MA0819.1	CLOCK	ENSG00000134852	bHLH	1.13507	0.0191309	CD4_8hr_vs_unstim	expression
MA1125.1.ZNF384	63021	0.639534	0.65501	0.53216	0.541627	0.0249442	0.158301	0.87422	MA1125.1	ZNF384	ENSG00000126746	C2H2 ZF	0.848835	0.081378	CD4_8hr_vs_unstim	NS
MA0802.1.TBR1	5724	0.0948125	0.10951	0.570457	0.530967	-0.0247916	-0.0835613	0.933405	MA0802.1	TBR1	ENSG00000136535	T-box	0.0858873	0.999946	CD4_8hr_vs_unstim	NS
MA0136.2.ELF5	5461	0.247882	0.28485	1.05963	1.25033	0.227674	1.14416	0.252556	MA0136.2	ELF5	ENSG00000135374	Ets	0.191343	0.999946	CD4_8hr_vs_unstim	NS
MA0052.4.MEF2A	9303	0.41716	0.388514	0.427655	0.394509	-0.0617916	-0.26349	0.792173	MA0052.4	MEF2A	ENSG00000068305	MADS box	0.156012	0.999946	CD4_8hr_vs_unstim	NS
MA0592.3.ESRRA	4250	0.034332	0.0423119	0.550594	0.52235	-0.0202644	-0.0615456	0.950925	MA0592.3	ESRRA	ENSG00000173153	Nuclear receptor	2.35678	1.24524e-05	CD4_8hr_vs_unstim	expression
MA0146.2.Zfx	9911	-0.0724617	-0.0866957	1.38074	1.45411	0.0591293	0.324541	0.745528	MA0146.2	ZFX	ENSG00000005889	C2H2 ZF	0.602066	0.283393	CD4_8hr_vs_unstim	NS
MA0002.2.RUNX1	13104	0.306912	0.392049	0.66827	0.77047	0.187337	0.948006	0.343126	MA0002.2	RUNX1	ENSG00000159216	Runt	0.530842	0.431757	CD4_8hr_vs_unstim	NS
MA1657.1.ZNF652	4676	0.219701	0.218712	0.528329	0.510036	-0.0192817	-0.056767	0.954731	MA1657.1	ZNF652	ENSG00000198740	C2H2 ZF	-1.59608	0.000327497	CD4_8hr_vs_unstim	expression
MA0684.2.RUNX3	7884	0.268956	0.335808	0.62498	0.690846	0.132719	0.682402	0.494985	MA0684.2	RUNX3	ENSG00000020633	Runt	0.906212	0.071121	CD4_8hr_vs_unstim	NS
MA0465.2.CDX2	6493	0.319258	0.300884	0.45	0.438755	-0.0296189	-0.107036	0.91476	MA0465.2	CDX2	ENSG00000165556	Homeodomain	-0.268534	0.999946	CD4_8hr_vs_unstim	NS
MA0469.3.E2F3	666	0.196898	0.193831	1.0665	1.1593	0.0897257	0.47333	0.635978	MA0469.3	E2F3	ENSG00000112242	E2F	-0.542906	0.2971	CD4_8hr_vs_unstim	NS
MA0751.1.ZIC4	6018	0.357294	0.349659	1.32361	1.38238	0.0511343	0.285662	0.775137	MA0751.1	ZIC4	ENSG00000174963	C2H2 ZF	-0.113822	0.999946	CD4_8hr_vs_unstim	NS
MA0799.1.RFX4	737	-0.00299817	-0.0499482	0.690303	0.76758	0.0303267	0.184476	0.85364	MA0799.1	RFX4	ENSG00000111783	RFX	0.00887555	0.999946	CD4_8hr_vs_unstim	NS
MA0635.1.BARHL2	1521	0.172214	0.102661	0.522528	0.50041	-0.0916706	-0.40879	0.682694	MA0635.1	BARHL2	ENSG00000143032	Homeodomain	-0.238288	0.999946	CD4_8hr_vs_unstim	NS
MA0889.1.GBX1	74	0.293167	0.339687	0.600597	0.681517	0.127441	0.656738	0.511349	MA0889.1	GBX1	ENSG00000164900	Homeodomain	-0.0515619	0.999946	CD4_8hr_vs_unstim	NS
MA1116.1.RBPJ	8767	0.131878	0.144679	0.781806	0.753429	-0.0155765	-0.0387486	0.969091	MA1116.1	RBPJ	ENSG00000168214	CSL	1.82397	0.000285144	CD4_8hr_vs_unstim	expression
MA0601.1.Arid3b	5487	0.408508	0.31592	0.37349	0.302403	-0.163675	-0.758943	0.447886	MA0601.1	ARID3B	ENSG00000179361	ARID/BRIGHT	-0.439363	0.375809	CD4_8hr_vs_unstim	NS
MA1145.1.FOSL2::JUND(var.2)	3692	0.968115	0.91874	1.463	1.49771	-0.0146647	-0.0343148	0.972626	MA1145.1	FOSL2	ENSG00000075426	bZIP	4.77059	2.59666e-09	CD4_8hr_vs_unstim	expression
MA0474.2.ERG	106	-6.11101	-6.54616	2.92697	3.02847	-0.333644	-1.58549	0.112854	MA0474.2	ERG	ENSG00000157554	Ets	-0.00503838	0.999946	CD4_8hr_vs_unstim	NS
MA0878.2.CDX1	273	0.419274	0.36201	0.423117	0.398125	-0.0822567	-0.363011	0.716597	MA0878.2	CDX1	ENSG00000113722	Homeodomain	0.0966985	0.999946	CD4_8hr_vs_unstim	NS
MA0786.1.POU3F1	1381	0.403832	0.350676	0.381225	0.322951	-0.111429	-0.504873	0.613648	MA0786.1	POU3F1	ENSG00000185668	Homeodomain,POU	0.748225	0.4636	CD4_8hr_vs_unstim	NS
MA1129.1.FOSL1::JUN(var.2)	4159	1.70092	1.6367	1.66113	1.71202	-0.0133226	-0.0277881	0.977831	MA1129.1	FOSL1	ENSG00000175592	bZIP	6.82772	1.30627e-10	CD4_8hr_vs_unstim	expression
MA1129.1.FOSL1::JUN(var.2)	4159	1.70092	1.6367	1.66113	1.71202	-0.0133226	-0.0277881	0.977831	MA1129.1	JUN	ENSG00000177606	bZIP	1.18698	0.00984663	CD4_8hr_vs_unstim	expression
MA0705.1.Lhx8	1075	0.809037	0.855595	0.795117	0.849551	0.100992	0.528116	0.597419	MA0705.1	LHX8	ENSG00000162624	Homeodomain	-0.313596	0.99163	CD4_8hr_vs_unstim	NS
MA0814.2.TFAP2C(var.2)	9884	0.146692	0.137762	1.28581	1.36735	0.0726161	0.390127	0.696443	MA0814.2	TFAP2C	ENSG00000087510	AP-2	-0.323024	0.999946	CD4_8hr_vs_unstim	NS
MA0773.1.MEF2D	1816	0.404776	0.362788	0.416964	0.388957	-0.0699958	-0.303387	0.761595	MA0773.1	MEF2D	ENSG00000116604	MADS box	-0.301777	0.816534	CD4_8hr_vs_unstim	NS
MA0827.1.OLIG3	164	0.198173	0.256312	0.345033	0.323043	0.0361497	0.212793	0.831489	MA0827.1	OLIG3	ENSG00000177468	bHLH	-0.0251847	0.999946	CD4_8hr_vs_unstim	NS
MA0826.1.OLIG1	284	0.25757	0.279321	0.333918	0.281376	-0.0307902	-0.112732	0.910243	MA0826.1	OLIG1	ENSG00000184221	bHLH	-0.0810353	0.999946	CD4_8hr_vs_unstim	NS
MA0088.2.ZNF143	3960	-0.0457646	-0.0536653	0.89146	0.88611	-0.0132514	-0.0274417	0.978107	MA0088.2	ZNF143	ENSG00000166478	C2H2 ZF	1.69382	0.000979033	CD4_8hr_vs_unstim	expression
MA0087.1.Sox5	7115	0.295751	0.325714	0.451625	0.447766	0.0261039	0.16394	0.869778	MA0087.1	SOX5	ENSG00000134532	Sox	-0.00180068	0.999946	CD4_8hr_vs_unstim	NS
MA1471.1.BARX2	5495	0.405899	0.334516	0.412222	0.353025	-0.13058	-0.598006	0.549836	MA1471.1	BARX2	ENSG00000043039	Homeodomain	0.0148571	0.999946	CD4_8hr_vs_unstim	NS
MA0484.2.HNF4G	129	-0.952091	-1.18584	0.572273	0.677756	-0.128265	-0.586746	0.557374	MA0484.2	HNF4G	ENSG00000164749	Nuclear receptor	-0.0427359	0.999946	CD4_8hr_vs_unstim	NS
MA0727.1.NR3C2	276	-0.0694653	-0.164444	0.746524	0.829997	-0.0115056	-0.018952	0.984879	MA0727.1	NR3C2	ENSG00000151623	Nuclear receptor	-1.77364	0.000110746	CD4_8hr_vs_unstim	expression
MA0071.1.RORA	4357	-0.13621	-0.109532	0.499362	0.461647	-0.0110373	-0.0166747	0.986696	MA0071.1	RORA	ENSG00000069667	Nuclear receptor	-1.13534	0.00797213	CD4_8hr_vs_unstim	expression
MA0504.1.NR2C2	7936	0.91001	0.961397	1.14122	1.19664	0.10681	0.556408	0.577932	MA0504.1	NR2C2	ENSG00000177463	Nuclear receptor	-0.630603	0.182926	CD4_8hr_vs_unstim	NS
MA1483.1.ELF2	4556	-1.11505	-1.23009	1.6328	1.87539	0.12754	0.657217	0.511041	MA1483.1	ELF2	ENSG00000109381	Ets	-0.692564	0.122323	CD4_8hr_vs_unstim	NS
MA0091.1.TAL1::TCF3	5964	0.189029	0.171333	0.497609	0.504555	-0.0107492	-0.015274	0.987814	MA0091.1	TCF3	ENSG00000071564	bHLH	1.04876	0.0332662	CD4_8hr_vs_unstim	expression
MA0144.2.STAT3	7760	-0.115708	-0.102628	0.65219	0.630834	-0.00827646	-0.00324908	0.997408	MA0144.2	STAT3	ENSG00000168610	STAT	1.97803	0.000503096	CD4_8hr_vs_unstim	expression
MA0796.1.TGIF1	6025	-0.0432436	-0.058425	0.510937	0.51806	-0.00805827	-0.00218803	0.998254	MA0796.1	TGIF1	ENSG00000177426	Homeodomain	1.22226	0.00425756	CD4_8hr_vs_unstim	expression
MA0526.3.USF2	5710	0.655752	0.633072	0.921478	0.936536	-0.00762284	-7.05397e-05	0.999944	MA0526.3	USF2	ENSG00000105698	bHLH	-0.986691	0.0289513	CD4_8hr_vs_unstim	expression
MA0006.1.Ahr::Arnt	6319	0.516373	0.593325	1.60733	1.75197	0.221598	1.11462	0.265015	MA0006.1	ARNT	ENSG00000143437	bHLH	-0.571555	0.262411	CD4_8hr_vs_unstim	NS
MA1575.1.THRB(var.2)	3059	0.454963	0.446003	0.86819	0.900914	0.0237639	0.152561	0.878744	MA1575.1	THRB	ENSG00000151090	Nuclear receptor	-0.183069	0.999946	CD4_8hr_vs_unstim	NS
MA0829.2.SREBF1(var.2)	4210	0.377502	0.381143	0.590178	0.579153	-0.00738448	0.00108859	0.999131	MA0829.2	SREBF1	ENSG00000072310	bHLH	1.55107	0.00172983	CD4_8hr_vs_unstim	expression
MA0038.2.GFI1	4424	-0.331691	-0.355459	0.685222	0.702875	-0.00611541	0.00726001	0.994207	MA0038.2	GFI1	ENSG00000162676	C2H2 ZF	4.59176	2.40052e-08	CD4_8hr_vs_unstim	expression
MA0728.1.Nr2f6(var.2)	3919	0.238604	0.243447	0.502069	0.492165	-0.00506048	0.0123901	0.990114	MA0728.1	NR2F6	ENSG00000160113	Nuclear receptor	1.78621	7.36161e-05	CD4_8hr_vs_unstim	expression
MA0758.1.E2F7	1994	0.34037	0.328923	0.900339	0.900434	-0.011352	-0.0182053	0.985475	MA0758.1	E2F7	ENSG00000165891	E2F	0.17367	0.999946	CD4_8hr_vs_unstim	NS
MA1624.1.Stat5a	5621	-0.211053	-0.203538	0.586437	0.575544	-0.00337857	0.0205691	0.983589	MA1624.1	STAT5A	ENSG00000126561	STAT	3.35087	1.7114e-06	CD4_8hr_vs_unstim	expression
MA1638.1.HAND2	6282	0.272416	0.26472	0.572009	0.589576	0.00987059	0.084999	0.932262	MA1638.1	HAND2	ENSG00000164107	bHLH	0.0554626	0.999946	CD4_8hr_vs_unstim	NS
MA0493.1.Klf1	9806	1.12172	1.28104	1.06429	1.1993	0.294329	1.46831	0.142021	MA0493.1	KLF1	ENSG00000105610	C2H2 ZF	0.132608	0.999946	CD4_8hr_vs_unstim	NS
MA1576.1.THRB(var.3)	3295	0.39653	0.426871	0.737538	0.752302	0.0451044	0.256339	0.797689	MA1576.1	THRB	ENSG00000151090	Nuclear receptor	-0.183069	0.999946	CD4_8hr_vs_unstim	NS
MA1517.1.KLF6	2059	1.22869	1.35301	1.73696	1.88674	0.274101	1.36994	0.170707	MA1517.1	KLF6	ENSG00000067082	C2H2 ZF	0.850514	0.0707661	CD4_8hr_vs_unstim	NS
MA0463.2.BCL6	2588	-0.0065586	0.00743192	0.635063	0.61847	-0.0026024	0.0243436	0.980579	MA0463.2	BCL6	ENSG00000113916	C2H2 ZF	2.36939	9.00679e-07	CD4_8hr_vs_unstim	expression
MA1541.1.NR6A1	3487	0.22052	0.232377	0.532591	0.522587	0.00185302	0.04601	0.963302	MA1541.1	NR6A1	ENSG00000148200	Nuclear receptor	2.37385	1.4485e-05	CD4_8hr_vs_unstim	expression
MA0793.1.POU6F2	4180	0.479736	0.360434	0.477499	0.389864	-0.206936	-0.96932	0.332385	MA0793.1	POU6F2	ENSG00000106536	Homeodomain,POU	-0.172728	0.999946	CD4_8hr_vs_unstim	NS
MA0896.1.Hmx1	441	0.260022	0.248813	0.567778	0.566531	-0.0124553	-0.0235705	0.981195	MA0896.1	HMX1	ENSG00000215612	Homeodomain	-0.225751	0.999946	CD4_8hr_vs_unstim	NS
MA1553.1.RARG(var.3)	988	0.271274	0.296325	0.628425	0.605546	0.00217345	0.0475683	0.96206	MA1553.1	RARG	ENSG00000172819	Nuclear receptor	-1.13073	0.00424211	CD4_8hr_vs_unstim	expression
MA0141.3.ESRRB	2404	-0.0264984	-0.0109122	0.485599	0.477331	0.0073177	0.0725844	0.942137	MA0141.3	ESRRB	ENSG00000119715	Nuclear receptor	0.163945	0.999946	CD4_8hr_vs_unstim	NS
MA1655.1.ZNF341	5998	-0.0437005	-0.0361226	0.701498	0.748531	0.0546101	0.302565	0.762222	MA1655.1	ZNF341	ENSG00000131061	C2H2 ZF	0.635723	0.149643	CD4_8hr_vs_unstim	NS
MA0862.1.GMEB2	896	2.07196	2.1836	1.8518	2.11454	0.374377	1.85757	0.0632297	MA0862.1	GMEB2	ENSG00000101216	SAND	0.274925	0.840803	CD4_8hr_vs_unstim	NS
MA0139.1.CTCF	14378	0.780644	0.753452	0.994945	1.00745	-0.0146827	-0.034402	0.972557	MA0139.1	CTCF	ENSG00000102974	C2H2 ZF	0.114677	0.999946	CD4_8hr_vs_unstim	NS
MA0039.4.KLF4	31878	1.32814	1.46082	1.70601	1.87172	0.298397	1.48809	0.136728	MA0039.4	KLF4	ENSG00000136826	C2H2 ZF	-0.0640775	0.999946	CD4_8hr_vs_unstim	NS
MA0494.1.Nr1h3::Rxra	3411	0.189488	0.188154	0.516562	0.497395	-0.0204994	-0.0626886	0.950015	MA0494.1	NR1H3	ENSG00000025434	Nuclear receptor	-0.371406	0.525998	CD4_8hr_vs_unstim	NS
MA0494.1.Nr1h3::Rxra	3411	0.189488	0.188154	0.516562	0.497395	-0.0204994	-0.0626886	0.950015	MA0494.1	RXRA	ENSG00000186350	Nuclear receptor	-0.477404	0.303767	CD4_8hr_vs_unstim	NS
MA1497.1.HOXA6	2315	0.210163	0.158743	0.473591	0.422683	-0.102328	-0.460618	0.645073	MA1497.1	HOXA6	ENSG00000106006	Homeodomain	0.453265	0.93203	CD4_8hr_vs_unstim	NS
MA1493.1.HES6	2440	0.389598	0.362755	0.982436	1.06317	0.0538912	0.299069	0.764888	MA1493.1	HES6	ENSG00000144485	bHLH	1.04831	0.0976074	CD4_8hr_vs_unstim	NS
MA0647.1.GRHL1	1378	-0.219081	-0.143108	0.524559	0.511634	0.0630484	0.3436	0.731147	MA0647.1	GRHL1	ENSG00000134317	Grainyhead	0.285707	0.957317	CD4_8hr_vs_unstim	NS
MA0106.3.TP53	1547	0.366922	0.383676	0.622013	0.608153	0.00289416	0.051073	0.959267	MA0106.3	TP53	ENSG00000141510	p53	1.01712	0.0268386	CD4_8hr_vs_unstim	expression
MA1568.1.TCF21(var.2)	2694	0.366278	0.335082	0.551459	0.535307	-0.0473478	-0.193251	0.846763	MA1568.1	TCF21	ENSG00000118526	bHLH	-0.479103	0.896147	CD4_8hr_vs_unstim	NS
MA1645.1.NKX2-2	6228	0.412259	0.402097	0.629764	0.618091	-0.0218352	-0.0691846	0.944843	MA1645.1	NKX2-2	ENSG00000125820	Homeodomain	0.0987586	0.999946	CD4_8hr_vs_unstim	NS
MA1620.1.Ptf1a(var.3)	7353	0.0294874	0.0312317	0.580525	0.624678	0.0458971	0.260194	0.794714	MA1620.1	PTF1A	ENSG00000168267	bHLH	0.38936	0.964058	CD4_8hr_vs_unstim	NS
MA0721.1.UNCX	3742	0.603311	0.467994	0.432136	0.359023	-0.20843	-0.976584	0.328775	MA0721.1	UNCX	ENSG00000164853	Homeodomain	-0.0451139	0.999946	CD4_8hr_vs_unstim	NS
MA0620.3.MITF	4505	0.637882	0.642107	0.984369	1.00738	0.0272352	0.169442	0.865449	MA0620.3	MITF	ENSG00000187098	bHLH	-0.157479	0.999946	CD4_8hr_vs_unstim	NS
MA1580.1.ZBTB32	5353	-0.19358	-0.153782	0.439336	0.403108	0.00356975	0.0543584	0.95665	MA1580.1	ZBTB32	ENSG00000011590	C2H2 ZF	2.56145	2.48439e-06	CD4_8hr_vs_unstim	expression
MA0839.1.CREB3L1	2271	0.536352	0.595509	1.30737	1.38	0.131794	0.677908	0.49783	MA0839.1	CREB3L1	ENSG00000157613	bZIP	0.0476052	0.999946	CD4_8hr_vs_unstim	NS
MA0145.3.TFCP2	2017	-0.424283	-0.319065	0.69243	0.686881	0.0996688	0.521682	0.601891	MA0145.3	TFCP2	ENSG00000135457	Grainyhead	0.403856	0.562126	CD4_8hr_vs_unstim	NS
MA1473.1.CDX4	1297	0.310227	0.311839	0.473937	0.452461	-0.019864	-0.0595987	0.952475	MA1473.1	CDX4	ENSG00000131264	Homeodomain	0.130034	0.999946	CD4_8hr_vs_unstim	NS
MA0113.3.NR3C1	2301	0.0636369	0.0364647	0.628528	0.651032	-0.00466889	0.0142943	0.988595	MA0113.3	NR3C1	ENSG00000113580	Nuclear receptor	0.302047	0.840809	CD4_8hr_vs_unstim	NS
MA0125.1.Nobox	3030	0.42689	0.386481	0.564608	0.519861	-0.0851556	-0.377108	0.706093	MA0125.1	NOBOX	ENSG00000106410	Homeodomain	-0.00696211	0.999946	CD4_8hr_vs_unstim	NS
MA0048.2.NHLH1	6229	-0.639518	-0.715108	0.93833	1.01102	-0.0028969	0.0229114	0.981721	MA0048.2	NHLH1	ENSG00000171786	bHLH	0.779052	0.393333	CD4_8hr_vs_unstim	NS
MA0092.1.Hand1::Tcf3	5215	0.171131	0.160316	0.573505	0.58965	0.00533009	0.0629188	0.949831	MA0092.1	TCF3	ENSG00000071564	bHLH	1.04876	0.0332662	CD4_8hr_vs_unstim	expression
MA0820.1.FIGLA	5887	-0.0494988	-0.0227167	0.55681	0.553201	0.0231725	0.149685	0.881013	MA0820.1	FIGLA	ENSG00000183733	bHLH	0.149692	0.999946	CD4_8hr_vs_unstim	NS
MA1562.1.SOX14	2903	0.327189	0.336353	0.539455	0.531613	0.00132275	0.0434313	0.965358	MA1562.1	SOX14	ENSG00000168875	Sox	0.475639	0.955241	CD4_8hr_vs_unstim	NS
MA0823.1.HEY1	211	1.85699	1.87924	2.63392	2.77678	0.165113	0.839934	0.400945	MA0823.1	HEY1	ENSG00000164683	bHLH	0.128699	0.999946	CD4_8hr_vs_unstim	NS
MA0074.1.RXRA::VDR	1912	0.126058	0.132609	0.661153	0.660202	0.00560123	0.0642373	0.948781	MA0074.1	VDR	ENSG00000111424	Nuclear receptor	1.62291	0.00019401	CD4_8hr_vs_unstim	expression
MA1554.1.RFX7	3432	0.851335	0.942256	1.0789	1.20847	0.220495	1.10925	0.26732	MA1554.1	RFX7	ENSG00000181827	RFX	0.141097	0.999946	CD4_8hr_vs_unstim	NS
MA1520.1.MAF	1098	0.294484	0.324137	0.497456	0.476822	0.00901845	0.0808551	0.935557	MA1520.1	MAF	ENSG00000178573	bZIP	-0.335623	0.78276	CD4_8hr_vs_unstim	NS
MA1647.1.PRDM4	9038	-0.113634	-0.0907086	0.631733	0.615787	0.00697948	0.0709397	0.943446	MA1647.1	PRDM4	ENSG00000110851	C2H2 ZF	0.952764	0.0441494	CD4_8hr_vs_unstim	expression
MA0040.1.Foxq1	6017	0.369531	0.406538	0.421396	0.441377	0.0569885	0.314131	0.753422	MA0040.1	FOXQ1	ENSG00000164379	Forkhead	0.0206702	0.999946	CD4_8hr_vs_unstim	NS
MA0836.2.CEBPD	4296	0.431506	0.444601	0.50591	0.502256	0.00944096	0.0829097	0.933923	MA0836.2	CEBPD	ENSG00000221869	bZIP	-0.482534	0.868135	CD4_8hr_vs_unstim	NS
MA0730.1.RARA(var.2)	1394	0.312761	0.327629	0.696441	0.688737	0.00716436	0.0718388	0.94273	MA0730.1	RARA	ENSG00000131759	Nuclear receptor	1.77226	0.00022128	CD4_8hr_vs_unstim	expression
MA0790.1.POU4F1	6692	0.467072	0.365047	0.415025	0.331619	-0.185431	-0.864741	0.387181	MA0790.1	POU4F1	ENSG00000152192	Homeodomain,POU	-0.228118	0.999946	CD4_8hr_vs_unstim	NS
MA0667.1.MYF6	2459	-0.171176	-0.198113	0.533462	0.520847	-0.0395525	-0.155343	0.876551	MA0667.1	MYF6	ENSG00000111046	bHLH	-0.557229	0.819461	CD4_8hr_vs_unstim	NS
MA0873.1.HOXD12	619	0.421624	0.255277	0.534398	0.419172	-0.281572	-1.33227	0.182771	MA0873.1	HOXD12	ENSG00000170178	Homeodomain	-0.597716	0.79934	CD4_8hr_vs_unstim	NS
MA0498.2.MEIS1	3530	-0.197437	-0.159402	0.658428	0.707497	0.087103	0.460576	0.645103	MA0498.2	MEIS1	ENSG00000143995	Homeodomain	0.0344438	0.999946	CD4_8hr_vs_unstim	NS
MA1573.1.THAP11	3929	0.243577	0.220438	1.20142	1.24438	0.0198187	0.133376	0.893896	MA1573.1	THAP11	ENSG00000168286	THAP finger	0.315336	0.801195	CD4_8hr_vs_unstim	NS
MA0706.1.MEOX2	851	0.344702	0.225658	0.441387	0.324	-0.236431	-1.11275	0.265815	MA0706.1	MEOX2	ENSG00000106511	Homeodomain	-0.00994287	0.999946	CD4_8hr_vs_unstim	NS
MA0095.2.YY1	6574	0.365767	0.354148	0.854477	0.866266	0.00017035	0.0378273	0.969825	MA0095.2	YY1	ENSG00000100811	C2H2 ZF	0.40166	0.640179	CD4_8hr_vs_unstim	NS
MA0859.1.Rarg	3804	0.160167	0.177006	0.511937	0.502479	0.0073806	0.0728903	0.941893	MA0859.1	RARG	ENSG00000172819	Nuclear receptor	-1.13073	0.00424211	CD4_8hr_vs_unstim	expression
MA0059.1.MAX::MYC	3948	0.333439	0.329215	1.01731	1.02909	0.00755042	0.0737161	0.941236	MA0059.1	MYC	ENSG00000136997	bHLH	3.64473	7.11602e-07	CD4_8hr_vs_unstim	expression
MA0860.1.Rarg(var.2)	3305	0.29247	0.306501	0.637869	0.635331	0.0114921	0.0928845	0.925995	MA0860.1	RARG	ENSG00000172819	Nuclear receptor	-1.13073	0.00424211	CD4_8hr_vs_unstim	expression
MA0092.1.Hand1::Tcf3	5215	0.171131	0.160316	0.573505	0.58965	0.00533009	0.0629188	0.949831	MA0092.1	HAND1	ENSG00000113196	bHLH	0.110245	0.999946	CD4_8hr_vs_unstim	NS
MA0693.2.VDR	5111	-0.237764	-0.23848	0.518096	0.531888	0.0130755	0.100584	0.91988	MA0693.2	VDR	ENSG00000111424	Nuclear receptor	1.62291	0.00019401	CD4_8hr_vs_unstim	expression
MA0681.2.PHOX2B	8258	0.422587	0.350673	0.356328	0.30107	-0.127172	-0.581431	0.56095	MA0681.2	PHOX2B	ENSG00000109132	Homeodomain	0.121933	0.999946	CD4_8hr_vs_unstim	NS
MA0510.2.RFX5	1036	0.172182	0.0707594	0.785568	0.900748	0.0137571	0.103899	0.91725	MA0510.2	RFX5	ENSG00000143390	RFX	0.899303	0.0416641	CD4_8hr_vs_unstim	expression
MA1550.1.PPARD	3763	0.208922	0.231311	0.695742	0.689652	0.0162989	0.116259	0.907447	MA1550.1	PPARD	ENSG00000112033	Nuclear receptor	-0.909334	0.0286649	CD4_8hr_vs_unstim	expression
MA1467.1.ATOH1(var.2)	3443	-0.0556173	-0.0608053	0.679984	0.711468	0.0262958	0.164874	0.869043	MA1467.1	ATOH1	ENSG00000172238	bHLH	0.0662181	0.999946	CD4_8hr_vs_unstim	NS
MA0442.2.SOX10	9498	0.599092	0.651227	0.60855	0.643442	0.0870267	0.460205	0.645369	MA0442.2	SOX10	ENSG00000100146	Sox	0.0282823	0.999946	CD4_8hr_vs_unstim	NS
MA0801.1.MGA	3069	0.0456604	0.0906051	0.633185	0.604893	0.016653	0.117981	0.906082	MA0801.1	MGA	ENSG00000174197	bHLH,T-box	1.56716	0.00241858	CD4_8hr_vs_unstim	expression
MA0019.1.Ddit3::Cebpa	3522	0.292814	0.315845	0.513451	0.510347	0.0199277	0.133906	0.893477	MA0019.1	DDIT3	ENSG00000175197	bZIP	1.78118	5.08582e-05	CD4_8hr_vs_unstim	expression
MA1150.1.RORB	3953	0.184742	0.184912	0.484136	0.491886	0.00792053	0.075516	0.939804	MA1150.1	RORB	ENSG00000198963	Nuclear receptor	-0.389913	0.903655	CD4_8hr_vs_unstim	NS
MA0837.1.CEBPE	2235	0.774002	0.785076	0.777328	0.81407	0.0478164	0.269527	0.787524	MA0837.1	CEBPE	ENSG00000092067	bZIP	-0.963547	0.270464	CD4_8hr_vs_unstim	NS
MA1531.1.NR1D1	3831	0.262904	0.259693	0.667134	0.691999	0.0216534	0.142298	0.886844	MA1531.1	NR1D1	ENSG00000126368	Nuclear receptor	1.75381	0.000179198	CD4_8hr_vs_unstim	expression
MA0517.1.STAT1::STAT2	18787	0.551264	0.488999	0.718573	0.595342	-0.185495	-0.865052	0.38701	MA0517.1	STAT2	ENSG00000170581	STAT	0.106115	0.999946	CD4_8hr_vs_unstim	NS
MA0774.1.MEIS2	923	0.382746	0.428767	0.596131	0.625057	0.0749474	0.401464	0.688079	MA0774.1	MEIS2	ENSG00000134138	Homeodomain	-0.245117	0.999946	CD4_8hr_vs_unstim	NS
MA0595.1.SREBF1	6918	0.744935	0.758076	0.741494	0.755139	0.0267866	0.16726	0.867165	MA0595.1	SREBF1	ENSG00000072310	bHLH	1.55107	0.00172983	CD4_8hr_vs_unstim	expression
MA1578.1.VEZF1	5613	1.44656	1.53521	1.41259	1.47455	0.150615	0.769431	0.441638	MA1578.1	VEZF1	ENSG00000136451	C2H2 ZF	-0.0763511	0.999946	CD4_8hr_vs_unstim	NS
MA0616.2.HES2	73	1.10448	1.11613	2.57609	2.54412	-0.0203177	-0.0618048	0.950718	MA0616.2	HES2	ENSG00000069812	bHLH	-0.215011	0.999946	CD4_8hr_vs_unstim	NS
MA0135.1.Lhx3	5883	0.443785	0.352386	0.371289	0.300868	-0.16182	-0.749922	0.453302	MA0135.1	LHX3	ENSG00000107187	Homeodomain	-0.401476	0.959036	CD4_8hr_vs_unstim	NS
MA0105.4.NFKB1	2198	-0.0512607	-0.0102375	0.821335	0.808119	0.0278075	0.172225	0.86326	MA0105.4	NFKB1	ENSG00000109320	Rel	4.37937	5.67663e-08	CD4_8hr_vs_unstim	expression
MA0682.2.PITX1	1792	0.223266	0.193121	0.415147	0.376832	-0.0684608	-0.295922	0.76729	MA0682.2	PITX1	ENSG00000069011	Homeodomain	0.194275	0.999946	CD4_8hr_vs_unstim	NS
MA0750.2.ZBTB7A	8366	0.20854	0.296719	1.75224	2.03856	0.374504	1.85819	0.0631423	MA0750.2	ZBTB7A	ENSG00000178951	C2H2 ZF	0.158305	0.999946	CD4_8hr_vs_unstim	NS
MA0865.1.E2F8	3134	0.450105	0.432428	0.95155	0.970668	0.00144094	0.0440061	0.9649	MA0865.1	E2F8	ENSG00000129173	E2F	0.102403	0.999946	CD4_8hr_vs_unstim	NS
MA1152.1.SOX15	10567	0.593335	0.6136	0.492389	0.496986	0.0248618	0.1579	0.874535	MA1152.1	SOX15	ENSG00000129194	Sox	0.231865	0.999946	CD4_8hr_vs_unstim	NS
MA0691.1.TFAP4	4062	-0.0351766	0.0107175	0.621258	0.603346	0.0279827	0.173077	0.862591	MA0691.1	TFAP4	ENSG00000090447	bHLH	1.2698	0.0038844	CD4_8hr_vs_unstim	expression
MA0626.1.Npas2	1128	0.304438	0.319697	1.06454	1.07734	0.0280539	0.173423	0.862319	MA0626.1	NPAS2	ENSG00000170485	bHLH	0.933395	0.0195569	CD4_8hr_vs_unstim	expression
MA1489.1.FOXN3	16228	0.804269	0.847233	0.548093	0.57107	0.0659416	0.357669	0.720591	MA1489.1	FOXN3	ENSG00000053254	Forkhead	-0.0714772	0.999946	CD4_8hr_vs_unstim	NS
MA0638.1.CREB3	715	0.204008	0.227921	2.1042	2.29452	0.214229	1.07878	0.280685	MA0638.1	CREB3	ENSG00000107175	bZIP	-0.184492	0.95895	CD4_8hr_vs_unstim	NS
MA1635.1.BHLHE22(var.2)	3208	-0.471919	-0.449419	0.798915	0.836836	0.0604216	0.330826	0.740776	MA1635.1	BHLHE22	ENSG00000180828	bHLH	0.0194833	0.999946	CD4_8hr_vs_unstim	NS
MA0767.1.GCM2	2761	0.108874	0.135792	0.876349	0.924956	0.0755249	0.404272	0.686013	MA0767.1	GCM2	ENSG00000124827	GCM	0.251006	0.999946	CD4_8hr_vs_unstim	NS
MA0884.1.DUXA	4993	0.629506	0.530799	0.514452	0.4477	-0.165459	-0.767619	0.442713	MA0884.1	DUXA	ENSG00000258873	Homeodomain	0.0304799	0.999946	CD4_8hr_vs_unstim	NS
MA1548.1.PLAGL2	7499	-0.183552	-0.196265	1.05657	1.09746	0.0281755	0.174015	0.861854	MA1548.1	PLAGL2	ENSG00000126003	C2H2 ZF	3.47888	1.61849e-06	CD4_8hr_vs_unstim	expression
MA0636.1.BHLHE41	1836	1.57584	1.67339	1.91096	2.04026	0.226853	1.14017	0.254214	MA0636.1	BHLHE41	ENSG00000123095	bHLH	0.0625261	0.999946	CD4_8hr_vs_unstim	NS
MA0700.2.LHX2	3680	0.571412	0.508172	0.475543	0.437997	-0.100786	-0.453116	0.650465	MA0700.2	LHX2	ENSG00000106689	Homeodomain	-0.0226659	0.999946	CD4_8hr_vs_unstim	NS
MA0500.2.MYOG	5308	-0.539774	-0.591787	0.789062	0.882566	0.0414916	0.23877	0.811284	MA0500.2	MYOG	ENSG00000122180	bHLH	0.300389	0.999946	CD4_8hr_vs_unstim	NS
MA0083.3.SRF	2357	0.387591	0.400798	0.597781	0.614093	0.029519	0.180548	0.856722	MA0083.3	SRF	ENSG00000112658	MADS box	2.31732	4.00869e-05	CD4_8hr_vs_unstim	expression
MA1593.1.ZNF317	8658	-0.0423708	-0.0494515	0.535351	0.57216	0.0297287	0.181568	0.855922	MA1593.1	ZNF317	ENSG00000130803	C2H2 ZF	1.20582	0.00731385	CD4_8hr_vs_unstim	expression
MA0783.1.PKNOX2	1994	0.149193	0.114579	0.531045	0.540001	-0.0256574	-0.0877716	0.930058	MA0783.1	PKNOX2	ENSG00000165495	Homeodomain	-0.0695871	0.999946	CD4_8hr_vs_unstim	NS
MA0817.1.BHLHE23	3369	0.479365	0.424154	0.389963	0.357284	-0.0878907	-0.390409	0.696234	MA0817.1	BHLHE23	ENSG00000125533	bHLH	-0.0169593	0.999946	CD4_8hr_vs_unstim	NS
MA0897.1.Hmx2	544	0.428773	0.370355	0.536732	0.502665	-0.0924852	-0.412752	0.679789	MA0897.1	HMX2	ENSG00000188816	Homeodomain	-0.158048	0.999946	CD4_8hr_vs_unstim	NS
MA0670.1.NFIA	4888	0.229866	0.247485	0.513669	0.526902	0.0308526	0.187033	0.851635	MA0670.1	NFIA	ENSG00000162599	SMAD	-1.35544	0.00114175	CD4_8hr_vs_unstim	expression
MA0744.2.SCRT2	4730	0.292071	0.306675	0.5943	0.643546	0.06385	0.347498	0.728217	MA0744.2	SCRT2	ENSG00000215397	C2H2 ZF	-0.351135	0.972132	CD4_8hr_vs_unstim	NS
MA0518.1.Stat4	6903	0.115388	0.135333	0.673115	0.684355	0.031185	0.18865	0.850367	MA0518.1	STAT4	ENSG00000138378	STAT	1.09898	0.0247641	CD4_8hr_vs_unstim	expression
MA1505.1.HOXC8	1512	0.47121	0.417223	0.470729	0.429273	-0.0954434	-0.427137	0.66928	MA1505.1	HOXC8	ENSG00000037965	Homeodomain	-0.167801	0.999946	CD4_8hr_vs_unstim	NS
MA0051.1.IRF2	7884	0.519767	0.410706	0.758571	0.584645	-0.282987	-1.33915	0.180522	MA0051.1	IRF2	ENSG00000168310	IRF	-0.604571	0.227248	CD4_8hr_vs_unstim	NS
MA0782.2.PKNOX1	6291	0.0727749	0.117842	0.759987	0.749473	0.0345532	0.205029	0.837549	MA0782.2	PKNOX1	ENSG00000160199	Homeodomain	1.2722	0.00347824	CD4_8hr_vs_unstim	expression
MA0731.1.BCL6B	2913	0.227942	0.238366	0.565256	0.547184	-0.00764805	-0.000193148	0.999846	MA0731.1	BCL6B	ENSG00000161940	C2H2 ZF	0.0951203	0.999946	CD4_8hr_vs_unstim	NS
MA1606.1.Foxf1	682	0.375009	0.355042	0.452715	0.485019	0.0123365	0.0969907	0.922734	MA1606.1	FOXF1	ENSG00000103241	Forkhead	-0.221129	0.999946	CD4_8hr_vs_unstim	NS
MA1643.1.NFIB	5108	0.223792	0.272223	0.65833	0.734221	0.124322	0.64157	0.521152	MA1643.1	NFIB	ENSG00000147862	SMAD	-0.215022	0.999946	CD4_8hr_vs_unstim	NS
MA1616.1.Prdm15	4166	0.0277847	0.046851	0.621796	0.638067	0.0353369	0.20884	0.834573	MA1616.1	PRDM15	ENSG00000141956	NA	1.40504	0.00127434	CD4_8hr_vs_unstim	expression
MA0481.3.FOXP1	1315	0.292437	0.306767	0.405725	0.429192	0.0377967	0.220802	0.825247	MA0481.3	FOXP1	ENSG00000114861	Forkhead	1.12591	0.0349998	CD4_8hr_vs_unstim	expression
MA1119.1.SIX2	4418	0.023773	-0.00765467	0.552631	0.503853	-0.0802048	-0.353033	0.724064	MA1119.1	SIX2	ENSG00000170577	Homeodomain	0.404779	0.945762	CD4_8hr_vs_unstim	NS
MA1627.1.Wt1	15339	1.41831	1.54278	1.42247	1.52051	0.222507	1.11904	0.263125	MA1627.1	WT1	ENSG00000184937	C2H2 ZF	-0.425078	0.930323	CD4_8hr_vs_unstim	NS
MA0864.2.E2F2	787	0.216659	0.184823	1.19935	1.19679	-0.0343981	-0.130277	0.896347	MA0864.2	E2F2	ENSG00000007968	E2F	0.0664752	0.999946	CD4_8hr_vs_unstim	NS
MA0822.1.HES7	850	0.769638	0.914169	1.92402	2.01551	0.236021	1.18476	0.236114	MA0822.1	HES7	ENSG00000179111	bHLH	0.267109	0.986718	CD4_8hr_vs_unstim	NS
MA0698.1.ZBTB18	6923	0.0671301	0.078067	0.530838	0.55777	0.0378687	0.221152	0.824974	MA0698.1	ZBTB18	ENSG00000179456	C2H2 ZF	-1.80449	0.000179725	CD4_8hr_vs_unstim	expression
MA0090.3.TEAD1	4503	0.21427	0.208687	0.467058	0.446117	-0.0265236	-0.0919841	0.926711	MA0090.3	TEAD1	ENSG00000187079	TEA	0.610479	0.316215	CD4_8hr_vs_unstim	NS
MA0643.1.Esrrg	4356	0.0332622	0.0553427	0.556712	0.504492	-0.0301395	-0.109568	0.912752	MA0643.1	ESRRG	ENSG00000196482	Nuclear receptor	-0.324149	0.967699	CD4_8hr_vs_unstim	NS
MA0856.1.RXRG	1336	-0.0458324	-0.0160039	0.595102	0.608396	0.0431223	0.2467	0.80514	MA0856.1	RXRG	ENSG00000143171	Nuclear receptor	0.0675244	0.999946	CD4_8hr_vs_unstim	NS
MA0888.1.EVX2	17	0.344685	0.348318	0.306992	0.366969	0.0636106	0.346334	0.729092	MA0888.1	EVX2	ENSG00000174279	Homeodomain	-0.1725	0.999946	CD4_8hr_vs_unstim	NS
MA0593.1.FOXP2	4528	0.532681	0.600497	0.564922	0.613266	0.116161	0.601881	0.547253	MA0593.1	FOXP2	ENSG00000128573	Forkhead	-0.162277	0.999946	CD4_8hr_vs_unstim	NS
MA1127.1.FOSB::JUN	4571	1.43341	1.40207	1.54813	1.61954	0.0400684	0.231849	0.816655	MA1127.1	FOSB	ENSG00000125740	bZIP	3.74162	6.80408e-08	CD4_8hr_vs_unstim	expression
MA1557.1.SMAD5	1970	0.160845	0.20157	0.689311	0.739659	0.0910733	0.479883	0.63131	MA1557.1	SMAD5	ENSG00000113658	SMAD	-0.209171	0.953214	CD4_8hr_vs_unstim	NS
MA1127.1.FOSB::JUN	4571	1.43341	1.40207	1.54813	1.61954	0.0400684	0.231849	0.816655	MA1127.1	JUN	ENSG00000177606	bZIP	1.18698	0.00984663	CD4_8hr_vs_unstim	expression
MA1148.1.PPARA::RXRA	4166	0.391885	0.385481	0.594484	0.565654	-0.0352339	-0.134342	0.893132	MA1148.1	RXRA	ENSG00000186350	Nuclear receptor	-0.477404	0.303767	CD4_8hr_vs_unstim	NS
MA0649.1.HEY2	644	0.371734	0.386916	1.20004	1.32142	0.13656	0.701081	0.483252	MA0649.1	HEY2	ENSG00000135547	bHLH	-0.105439	0.999946	CD4_8hr_vs_unstim	NS
MA1589.1.ZNF140	3523	0.365947	0.383696	0.652852	0.675955	0.0408514	0.235657	0.813699	MA1589.1	ZNF140	ENSG00000196387	C2H2 ZF	0.940597	0.017882	CD4_8hr_vs_unstim	expression
MA0100.3.MYB	5360	0.0812426	0.102698	0.597786	0.622086	0.0457559	0.259507	0.795244	MA0100.3	MYB	ENSG00000118513	Myb/SANT	2.46194	6.30484e-06	CD4_8hr_vs_unstim	expression
MA0119.1.NFIC::TLX1	5748	0.234106	0.26696	0.636023	0.703744	0.100575	0.52609	0.598826	MA0119.1	NFIC	ENSG00000141905	SMAD	0.283537	0.865817	CD4_8hr_vs_unstim	NS
MA0119.1.NFIC::TLX1	5748	0.234106	0.26696	0.636023	0.703744	0.100575	0.52609	0.598826	MA0119.1	TLX1	ENSG00000107807	Homeodomain	-0.130879	0.999946	CD4_8hr_vs_unstim	NS
MA1594.1.ZNF382	2469	0.358171	0.367214	0.576139	0.593492	0.0263964	0.165363	0.868658	MA1594.1	ZNF382	ENSG00000161298	C2H2 ZF	-0.300035	0.703974	CD4_8hr_vs_unstim	NS
MA0515.1.Sox6	4303	0.497593	0.526176	0.633686	0.671423	0.0663191	0.359505	0.719217	MA0515.1	SOX6	ENSG00000110693	Sox	-0.105317	0.999946	CD4_8hr_vs_unstim	NS
MA0736.1.GLIS2	3818	0.52013	0.531219	1.36843	1.44027	0.0829216	0.440242	0.659762	MA0736.1	GLIS2	ENSG00000126603	C2H2 ZF	0.0115084	0.999946	CD4_8hr_vs_unstim	NS
MA1514.1.KLF17	11269	1.39756	1.49506	1.25098	1.319	0.165508	0.841857	0.399868	MA1514.1	KLF17	ENSG00000171872	C2H2 ZF	0.0689821	0.999946	CD4_8hr_vs_unstim	NS
MA1587.1.ZNF135	11103	0.214578	0.238141	0.721615	0.742432	0.04438	0.252816	0.80041	MA1587.1	ZNF135	ENSG00000176293	C2H2 ZF	-0.169319	0.99498	CD4_8hr_vs_unstim	NS
MA1558.1.SNAI1	8948	0.137466	0.130819	0.686811	0.743803	0.0503463	0.28183	0.778074	MA1558.1	SNAI1	ENSG00000124216	C2H2 ZF	2.98827	2.20567e-05	CD4_8hr_vs_unstim	expression
MA0527.1.ZBTB33	2325	0.427761	0.460708	2.34872	2.56231	0.246536	1.23589	0.2165	MA0527.1	ZBTB33	ENSG00000177485	C2H2 ZF	0.138246	0.999946	CD4_8hr_vs_unstim	NS
MA1641.1.MYF5	8020	-0.52794	-0.587302	0.696752	0.752593	-0.00352073	0.0198778	0.984141	MA1641.1	MYF5	ENSG00000111049	bHLH	-0.65709	0.788832	CD4_8hr_vs_unstim	NS
MA0871.2.TFEC	3635	1.16368	1.24474	1.50194	1.58199	0.161111	0.82047	0.411948	MA0871.2	TFEC	ENSG00000105967	bHLH	0.371702	0.933127	CD4_8hr_vs_unstim	NS
MA0777.1.MYBL2	764	-0.115398	-0.152274	0.6957	0.71705	-0.0155262	-0.0385043	0.969286	MA0777.1	MYBL2	ENSG00000101057	Myb/SANT	0.163878	0.999946	CD4_8hr_vs_unstim	NS
MA1559.1.SNAI3	1595	0.177218	0.214324	0.622334	0.635623	0.0503958	0.282071	0.777889	MA1559.1	SNAI3	ENSG00000185669	C2H2 ZF	-1.50692	0.011704	CD4_8hr_vs_unstim	expression
MA1149.1.RARA::RXRG	3364	0.367613	0.388136	0.860932	0.892319	0.0519096	0.289432	0.772251	MA1149.1	RARA	ENSG00000131759	Nuclear receptor	1.77226	0.00022128	CD4_8hr_vs_unstim	expression
MA0147.3.MYC	4259	0.694937	0.724952	1.40666	1.42955	0.0528978	0.294238	0.768576	MA0147.3	MYC	ENSG00000136997	bHLH	3.64473	7.11602e-07	CD4_8hr_vs_unstim	expression
MA0769.2.TCF7	7207	-0.0509025	-0.0386074	0.557416	0.600038	0.0549167	0.304056	0.761085	MA0769.2	TCF7	ENSG00000081059	Sox	-1.73327	0.00185947	CD4_8hr_vs_unstim	expression
MA0479.1.FOXH1	4650	0.498034	0.525219	0.513026	0.512629	0.0267881	0.167268	0.867159	MA0479.1	FOXH1	ENSG00000160973	Forkhead	-0.11911	0.999946	CD4_8hr_vs_unstim	NS
MA0159.1.RARA::RXRA	2115	0.415315	0.429436	0.725838	0.770068	0.0583504	0.320754	0.748397	MA0159.1	RARA	ENSG00000131759	Nuclear receptor	1.77226	0.00022128	CD4_8hr_vs_unstim	expression
MA0909.2.HOXD13	2273	0.346235	0.394165	0.683605	0.700117	0.0644412	0.350373	0.726059	MA0909.2	HOXD13	ENSG00000128714	Homeodomain	0.171875	0.999946	CD4_8hr_vs_unstim	NS
MA0863.1.MTF1	2720	0.130033	0.119422	0.895586	0.965518	0.0593215	0.325476	0.744821	MA0863.1	MTF1	ENSG00000188786	C2H2 ZF	1.89544	0.00025502	CD4_8hr_vs_unstim	expression
MA1109.1.NEUROD1	4327	0.378582	0.389779	0.656658	0.697368	0.0519063	0.289416	0.772263	MA1109.1	NEUROD1	ENSG00000162992	bHLH	-0.400691	0.957317	CD4_8hr_vs_unstim	NS
MA0738.1.HIC2	5669	0.216606	0.235221	0.71296	0.759512	0.0651676	0.353905	0.72341	MA0738.1	HIC2	ENSG00000169635	C2H2 ZF	0.947725	0.0232948	CD4_8hr_vs_unstim	expression
MA0737.1.GLIS3	1553	0.225675	0.295839	0.691766	0.690425	0.068823	0.371681	0.71013	MA0737.1	GLIS3	ENSG00000107249	C2H2 ZF	1.1359	0.00907335	CD4_8hr_vs_unstim	expression
MA0784.1.POU1F1	7130	0.625804	0.516957	0.516754	0.435173	-0.190428	-0.889041	0.373981	MA0784.1	POU1F1	ENSG00000064835	Homeodomain,POU	-0.0827001	0.999946	CD4_8hr_vs_unstim	NS
MA0658.1.LHX6	1441	0.40316	0.329146	0.423169	0.35497	-0.142213	-0.654575	0.512742	MA0658.1	LHX6	ENSG00000106852	Homeodomain	0.171701	0.999946	CD4_8hr_vs_unstim	NS
MA0776.1.MYBL1	862	-0.614957	-0.56774	0.756429	0.749315	0.0401026	0.232016	0.816526	MA0776.1	MYBL1	ENSG00000185697	Myb/SANT	-0.20166	0.995028	CD4_8hr_vs_unstim	NS
MA0752.1.ZNF410	2812	0.43814	0.385134	0.504674	0.486111	-0.0715676	-0.31103	0.755778	MA0752.1	ZNF410	ENSG00000119725	C2H2 ZF	0.479529	0.502683	CD4_8hr_vs_unstim	NS
MA0908.1.HOXD11	728	0.290361	0.280429	0.470242	0.449755	-0.0304191	-0.110927	0.911674	MA0908.1	HOXD11	ENSG00000128713	Homeodomain	0.12867	0.999946	CD4_8hr_vs_unstim	NS
MA0058.3.MAX	52	0.202689	0.449993	1.44344	1.5009	0.304767	1.51906	0.128747	MA0058.3	MAX	ENSG00000125952	bHLH	0.0487489	0.999946	CD4_8hr_vs_unstim	NS
MA0041.1.Foxd3	12241	0.507203	0.536984	0.446382	0.452938	0.036336	0.213699	0.830782	MA0041.1	FOXD3	ENSG00000187140	Forkhead	0.0412008	0.999946	CD4_8hr_vs_unstim	NS
MA1556.1.RXRG(var.2)	2031	0.272297	0.362352	1.15065	1.21378	0.153179	0.781899	0.434274	MA1556.1	RXRG	ENSG00000143171	Nuclear receptor	0.0675244	0.999946	CD4_8hr_vs_unstim	NS
MA1604.1.Ebf2	6675	0.380171	0.370018	0.81459	0.810465	-0.0142772	-0.0324304	0.974129	MA1604.1	EBF2	ENSG00000221818	EBF1	-0.0550179	0.999946	CD4_8hr_vs_unstim	NS
MA1637.1.EBF3	784	0.21435	0.15409	0.941984	0.933591	-0.0686526	-0.296855	0.766578	MA1637.1	EBF3	ENSG00000108001	EBF1	-0.172308	0.999946	CD4_8hr_vs_unstim	NS
MA0007.3.Ar	739	-0.0827817	-0.0794361	0.910243	1.04337	0.136472	0.700655	0.483518	MA0007.3	AR	ENSG00000169083	Nuclear receptor	0.0220884	0.999946	CD4_8hr_vs_unstim	NS
MA0599.1.KLF5	33386	1.2411	1.38046	1.88339	2.08566	0.341616	1.69826	0.0894593	MA0599.1	KLF5	ENSG00000102554	C2H2 ZF	-0.026997	0.999946	CD4_8hr_vs_unstim	NS
MA1555.1.RXRB(var.2)	3082	0.211684	0.196761	0.818159	0.841984	0.00890239	0.0802907	0.936006	MA1555.1	RXRB	ENSG00000204231	Nuclear receptor	0.259109	0.89418	CD4_8hr_vs_unstim	NS
MA0671.1.NFIX	4965	0.545863	0.582542	0.56038	0.601076	0.0773747	0.413268	0.679411	MA0671.1	NFIX	ENSG00000008441	SMAD	2.8172	1.80077e-06	CD4_8hr_vs_unstim	expression
MA1528.1.NFIX(var.2)	2596	0.434119	0.448533	0.976304	1.04649	0.0846021	0.448414	0.653854	MA1528.1	NFIX	ENSG00000008441	SMAD	2.8172	1.80077e-06	CD4_8hr_vs_unstim	expression
MA0739.1.Hic1	5383	0.611264	0.668407	0.636756	0.670796	0.0911828	0.480416	0.630932	MA0739.1	HIC1	ENSG00000177374	C2H2 ZF	3.90483	2.65223e-07	CD4_8hr_vs_unstim	expression
MA0759.1.ELK3	592	-0.630944	-0.774491	2.93096	3.16774	0.0932263	0.490353	0.623884	MA0759.1	ELK3	ENSG00000111145	Ets	1.17032	0.0132806	CD4_8hr_vs_unstim	expression
MA0003.4.TFAP2A	9203	0.138166	0.132657	0.998759	1.05458	0.0503074	0.281641	0.778219	MA0003.4	TFAP2A	ENSG00000137203	AP-2	-0.134337	0.999946	CD4_8hr_vs_unstim	NS
MA0765.2.ETV5	8563	0.40644	0.463641	1.61388	1.8981	0.341419	1.6973	0.0896398	MA0765.2	ETV5	ENSG00000244405	Ets	-0.225492	0.999946	CD4_8hr_vs_unstim	NS
MA0844.1.XBP1	1316	0.545568	0.5621	1.60693	1.6882	0.0978023	0.512606	0.608227	MA0844.1	XBP1	ENSG00000100219	bZIP	1.97248	0.000318267	CD4_8hr_vs_unstim	expression
MA1621.1.Rbpjl	6800	0.216619	0.223252	0.660536	0.710702	0.0567982	0.313205	0.754125	MA1621.1	RBPJL	ENSG00000124232	CSL	-0.289879	0.999946	CD4_8hr_vs_unstim	NS
MA1615.1.Plagl1	9672	0.331324	0.359618	1.11458	1.18517	0.0988787	0.517841	0.60457	MA1615.1	PLAGL1	ENSG00000118495	C2H2 ZF	1.29994	0.00114217	CD4_8hr_vs_unstim	expression
MA0722.1.VAX1	2273	0.525258	0.467403	0.419281	0.362916	-0.11422	-0.518448	0.604146	MA0722.1	VAX1	ENSG00000148704	Homeodomain	0.0507758	0.999946	CD4_8hr_vs_unstim	NS
MA0029.1.Mecom	6211	0.571519	0.569519	0.45479	0.454748	-0.00204161	0.0270707	0.978403	MA0029.1	MECOM	ENSG00000085276	C2H2 ZF	-0.34401	0.969274	CD4_8hr_vs_unstim	NS
MA0163.1.PLAG1	10970	0.550724	0.57517	1.20655	1.28119	0.0990859	0.518848	0.603867	MA0163.1	PLAG1	ENSG00000181690	C2H2 ZF	-1.86484	2.50461e-05	CD4_8hr_vs_unstim	expression
MA1654.1.ZNF16	4142	0.277918	0.284732	0.718285	0.719383	0.0079115	0.0754721	0.939839	MA1654.1	ZNF16	ENSG00000170631	C2H2 ZF	0.636383	0.105282	CD4_8hr_vs_unstim	NS
MA0877.2.BARHL1	652	0.390729	0.361057	1.04782	1.11675	0.0392592	0.227914	0.819713	MA0877.2	BARHL1	ENSG00000125492	Homeodomain	0.0475443	0.999946	CD4_8hr_vs_unstim	NS
MA1479.1.DMRTC2	4720	0.306515	0.286773	0.446001	0.401234	-0.0645083	-0.276702	0.782009	MA1479.1	DMRTC2	ENSG00000142025	DM	-0.0602012	0.999946	CD4_8hr_vs_unstim	NS
MA0473.3.ELF1	16553	0.520044	0.659896	0.917793	1.10364	0.325699	1.62086	0.105049	MA0473.3	ELF1	ENSG00000120690	Ets	0.348372	0.758572	CD4_8hr_vs_unstim	NS
MA1608.1.Isl1	2923	0.452099	0.396833	0.483998	0.451908	-0.0873558	-0.387807	0.698159	MA1608.1	ISL1	ENSG00000016082	Homeodomain	-0.17171	0.999946	CD4_8hr_vs_unstim	NS
MA0714.1.PITX3	2751	0.31948	0.265176	0.511804	0.489442	-0.076665	-0.335819	0.737008	MA0714.1	PITX3	ENSG00000107859	Homeodomain	0.045395	0.999946	CD4_8hr_vs_unstim	NS
MA0665.1.MSC	3473	-0.577559	-0.585986	0.534591	0.5755	0.0324815	0.194955	0.845429	MA0665.1	MSC	ENSG00000178860	bHLH	0.0805087	0.999946	CD4_8hr_vs_unstim	NS
MA0470.2.E2F4	942	0.309434	0.312439	1.53555	1.63362	0.101075	0.528521	0.597138	MA0470.2	E2F4	ENSG00000205250	E2F	2.0661	0.000199443	CD4_8hr_vs_unstim	expression
MA0505.1.Nr5a2	4833	0.137627	0.180631	0.54903	0.552019	0.0459931	0.260661	0.794354	MA0505.1	NR5A2	ENSG00000116833	Nuclear receptor	-0.356091	0.969228	CD4_8hr_vs_unstim	NS
MA0522.3.TCF3	1330	0.996545	1.00609	1.64977	1.74532	0.105092	0.548057	0.583653	MA0522.3	TCF3	ENSG00000071564	bHLH	1.04876	0.0332662	CD4_8hr_vs_unstim	expression
MA0761.2.ETV1	4495	0.437058	0.569971	0.724356	0.957233	0.36579	1.81581	0.069399	MA0761.2	ETV1	ENSG00000006468	Ets	-0.231351	0.999946	CD4_8hr_vs_unstim	NS
MA1151.1.RORC	3495	0.155452	0.145885	0.497494	0.47837	-0.0286895	-0.102516	0.918347	MA1151.1	RORC	ENSG00000143365	Nuclear receptor	0.425298	0.810473	CD4_8hr_vs_unstim	NS
MA0692.1.TFEB	3182	0.897611	0.959313	0.819049	0.869313	0.111966	0.581481	0.560916	MA0692.1	TFEB	ENSG00000112561	bHLH	0.817272	0.0262839	CD4_8hr_vs_unstim	expression
MA0475.2.FLI1	30	-2.95248	-2.89271	2.01107	2.06438	0.113077	0.586887	0.55728	MA0475.2	FLI1	ENSG00000151702	Ets	-1.4105	0.00218216	CD4_8hr_vs_unstim	expression
MA1133.1.JUN::JUNB(var.2)	997	0.257679	0.30482	1.06538	1.13303	0.114795	0.59524	0.551683	MA1133.1	JUN	ENSG00000177606	bZIP	1.18698	0.00984663	CD4_8hr_vs_unstim	expression
MA1133.1.JUN::JUNB(var.2)	997	0.257679	0.30482	1.06538	1.13303	0.114795	0.59524	0.551683	MA1133.1	JUNB	ENSG00000171223	bZIP	1.9656	0.000149157	CD4_8hr_vs_unstim	expression
MA0828.1.SREBF2(var.2)	954	0.59136	0.701012	0.667952	0.676639	0.11834	0.612478	0.540222	MA0828.1	SREBF2	ENSG00000198911	bHLH	1.80508	0.000434517	CD4_8hr_vs_unstim	expression
MA1100.2.ASCL1	2537	-0.633178	-0.668792	0.700807	0.789515	0.0530937	0.29519	0.767848	MA1100.2	ASCL1	ENSG00000139352	bHLH	-0.175694	0.999946	CD4_8hr_vs_unstim	NS
MA1656.1.ZNF449	7124	0.386486	0.432268	1.02209	1.11986	0.143557	0.735108	0.462274	MA1656.1	ZNF449	ENSG00000173275	C2H2 ZF	-1.4931	0.00142954	CD4_8hr_vs_unstim	expression
MA0775.1.MEIS3	6849	0.185597	0.161579	0.761971	0.825032	0.0390434	0.226865	0.820529	MA0775.1	MEIS3	ENSG00000105419	Homeodomain	-0.149643	0.999946	CD4_8hr_vs_unstim	NS
MA1527.1.NFIC(var.2)	5169	0.440879	0.499792	0.730375	0.813531	0.142069	0.727871	0.466693	MA1527.1	NFIC	ENSG00000141905	SMAD	0.283537	0.865817	CD4_8hr_vs_unstim	NS
MA0810.1.TFAP2A(var.2)	8421	-0.218361	-0.223075	1.45929	1.56155	0.0975463	0.511361	0.609098	MA0810.1	TFAP2A	ENSG00000137203	AP-2	-0.134337	0.999946	CD4_8hr_vs_unstim	NS
MA0609.2.CREM	3663	0.593646	0.624188	1.66972	1.79004	0.150856	0.770602	0.440943	MA0609.2	CREM	ENSG00000095794	bZIP	3.36005	1.32527e-07	CD4_8hr_vs_unstim	expression
MA1145.1.FOSL2::JUND(var.2)	3692	0.968115	0.91874	1.463	1.49771	-0.0146647	-0.0343148	0.972626	MA1145.1	JUND	ENSG00000130522	bZIP	0.829847	0.100959	CD4_8hr_vs_unstim	NS
MA0259.1.ARNT::HIF1A	1888	0.887105	0.920556	1.55883	1.67704	0.151659	0.774506	0.438632	MA0259.1	HIF1A	ENSG00000100644	bHLH	2.61476	1.16717e-05	CD4_8hr_vs_unstim	expression
MA0660.1.MEF2B	5800	0.40973	0.371105	0.440673	0.39624	-0.0830575	-0.366905	0.71369	MA0660.1	MEF2B	ENSG00000213999	MADS box	0.633998	0.707977	CD4_8hr_vs_unstim	NS
MA0155.1.INSM1	8180	0.454705	0.518723	1.13559	1.19362	0.122045	0.630498	0.528369	MA0155.1	INSM1	ENSG00000173404	C2H2 ZF	-0.212269	0.999946	CD4_8hr_vs_unstim	NS
MA1546.1.PAX3(var.2)	1001	0.403255	0.409269	0.907071	0.881713	-0.0193434	-0.0570671	0.954492	MA1546.1	PAX3	ENSG00000135903	Homeodomain,Paired box	-0.217047	0.999946	CD4_8hr_vs_unstim	NS
MA1642.1.NEUROG2(var.2)	5448	0.494935	0.518566	0.569433	0.590205	0.044404	0.252933	0.80032	MA1642.1	NEUROG2	ENSG00000178403	bHLH	-0.0767587	0.999946	CD4_8hr_vs_unstim	NS
MA1683.1.FOXA3	448	0.264518	0.344097	0.42956	0.484764	0.134784	0.692446	0.488657	MA1683.1	FOXA3	ENSG00000170608	Forkhead	0.12811	0.999946	CD4_8hr_vs_unstim	NS
MA0657.1.KLF13	3401	1.02723	1.05927	1.64626	1.76918	0.154951	0.790518	0.429225	MA0657.1	KLF13	ENSG00000169926	C2H2 ZF	-1.54294	0.00144998	CD4_8hr_vs_unstim	expression
MA0910.2.HOXD8	2395	0.558036	0.459054	0.594913	0.564884	-0.129011	-0.590373	0.554941	MA0910.2	HOXD8	ENSG00000175879	Homeodomain	-0.0469083	0.999946	CD4_8hr_vs_unstim	NS
MA1508.1.IKZF1	19324	0.607442	0.728722	0.724201	0.860198	0.257276	1.28812	0.197704	MA1508.1	IKZF1	ENSG00000185811	C2H2 ZF	0.628424	0.350298	CD4_8hr_vs_unstim	NS
MA0161.2.NFIC	6445	0.436593	0.460501	0.554451	0.5818	0.051257	0.286259	0.77468	MA0161.2	NFIC	ENSG00000141905	SMAD	0.283537	0.865817	CD4_8hr_vs_unstim	NS
MA0597.1.THAP1	7947	0.321548	0.35938	0.90971	0.969999	0.09812	0.514151	0.607147	MA0597.1	THAP1	ENSG00000131931	THAP finger	0.692358	0.119301	CD4_8hr_vs_unstim	NS
MA0646.1.GCM1	2885	0.0976526	0.103578	0.810016	0.86633	0.0622392	0.339665	0.734109	MA0646.1	GCM1	ENSG00000137270	GCM	-0.229904	0.999946	CD4_8hr_vs_unstim	NS
MA0851.1.Foxj3	6139	0.490501	0.565823	0.467913	0.529414	0.136822	0.702356	0.482457	MA0851.1	FOXJ3	ENSG00000198815	Forkhead	0.673517	0.217778	CD4_8hr_vs_unstim	NS
MA1646.1.OSR2	8763	0.160425	0.169288	0.708182	0.747735	0.0484161	0.272444	0.785281	MA1646.1	OSR2	ENSG00000164920	C2H2 ZF	-0.705903	0.627937	CD4_8hr_vs_unstim	NS
MA0813.1.TFAP2B(var.3)	769	0.231227	0.215431	1.27317	1.33931	0.0503535	0.281865	0.778047	MA0813.1	TFAP2B	ENSG00000008196	AP-2	-0.195506	0.999946	CD4_8hr_vs_unstim	NS
MA0858.1.Rarb(var.2)	2933	0.284411	0.279295	0.570758	0.576274	0.000400066	0.0389444	0.968935	MA0858.1	RARB	ENSG00000077092	Nuclear receptor	-0.0383877	0.999946	CD4_8hr_vs_unstim	NS
MA0059.1.MAX::MYC	3948	0.333439	0.329215	1.01731	1.02909	0.00755042	0.0737161	0.941236	MA0059.1	MAX	ENSG00000125952	bHLH	0.0487489	0.999946	CD4_8hr_vs_unstim	NS
MA0733.1.EGR4	6595	1.28503	1.31204	1.84041	1.97536	0.16196	0.824602	0.409598	MA0733.1	EGR4	ENSG00000135625	C2H2 ZF	1.832	0.00372518	CD4_8hr_vs_unstim	expression
MA0603.1.Arntl	3182	0.798723	0.842019	1.80744	1.93247	0.168336	0.855607	0.392215	MA0603.1	ARNTL	ENSG00000133794	bHLH	-1.20452	0.00369877	CD4_8hr_vs_unstim	expression
MA1107.2.KLF9	24595	0.911357	0.983428	1.21745	1.3138	0.16842	0.856016	0.391989	MA1107.2	KLF9	ENSG00000119138	C2H2 ZF	1.7632	0.000337865	CD4_8hr_vs_unstim	expression
MA1629.1.Zic2	11452	0.157262	0.164619	0.769012	0.805809	0.0441538	0.251716	0.80126	MA1629.1	ZIC2	ENSG00000043355	C2H2 ZF	0.0758994	0.999946	CD4_8hr_vs_unstim	NS
MA1596.1.ZNF460	19796	0.618286	0.682457	1.38166	1.48632	0.168828	0.857999	0.390893	MA1596.1	ZNF460	ENSG00000197714	C2H2 ZF	1.36405	0.00399986	CD4_8hr_vs_unstim	expression
MA1535.1.NR2C1	4983	-0.0608013	-0.0542367	0.719803	0.723425	0.0101861	0.0865335	0.931042	MA1535.1	NR2C1	ENSG00000120798	Nuclear receptor	-0.702812	0.0692753	CD4_8hr_vs_unstim	NS
MA0631.1.Six3	2145	0.197195	0.159454	0.424003	0.390019	-0.0717251	-0.311796	0.755196	MA0631.1	SIX3	ENSG00000138083	Homeodomain	0.275038	0.999946	CD4_8hr_vs_unstim	NS
MA1466.1.ATF6	1745	0.584494	0.643511	1.51567	1.6296	0.172947	0.878032	0.379926	MA1466.1	ATF6	ENSG00000118217	bZIP	1.10684	0.0252734	CD4_8hr_vs_unstim	expression
MA0138.2.REST	3506	-0.0167452	-0.0114089	0.725509	0.773565	0.053392	0.296641	0.766741	MA0138.2	REST	ENSG00000084093	C2H2 ZF	0.0233013	0.999946	CD4_8hr_vs_unstim	NS
MA1140.2.JUNB(var.2)	694	0.603398	0.686993	1.55834	1.66578	0.191039	0.966009	0.33404	MA1140.2	JUNB	ENSG00000171223	bZIP	1.9656	0.000149157	CD4_8hr_vs_unstim	expression
MA0641.1.ELF4	1632	-0.0364792	0.0128697	1.1382	1.36159	0.272739	1.36331	0.172784	MA0641.1	ELF4	ENSG00000102034	Ets	-0.14591	0.999946	CD4_8hr_vs_unstim	NS
MA0674.1.NKX6-1	1658	0.57271	0.456373	0.43881	0.358113	-0.197035	-0.92117	0.356962	MA0674.1	NKX6-1	ENSG00000163623	Homeodomain	-0.0422197	0.999946	CD4_8hr_vs_unstim	NS
MA0771.1.HSF4	1239	0.159297	0.214335	0.640729	0.636746	0.0510545	0.285274	0.775434	MA0771.1	HSF4	ENSG00000102878	HSF	-0.232813	0.999946	CD4_8hr_vs_unstim	NS
MA0715.1.PROP1	6575	0.452534	0.374269	0.362869	0.302605	-0.138529	-0.63666	0.524346	MA0715.1	PROP1	ENSG00000175325	Homeodomain	-0.0407738	0.999946	CD4_8hr_vs_unstim	NS
MA1547.1.PITX2	1994	0.277406	0.240465	0.272433	0.246828	-0.0625458	-0.267158	0.789348	MA1547.1	PITX2	ENSG00000164093	Homeodomain	-0.241205	0.999946	CD4_8hr_vs_unstim	NS
MA0112.3.ESR1	3112	0.0201557	0.0215304	0.615036	0.608499	-0.00516173	0.0118977	0.990507	MA0112.3	ESR1	ENSG00000091831	Nuclear receptor	-0.497159	0.395571	CD4_8hr_vs_unstim	NS
MA0719.1.RHOXF1	1884	0.230112	0.262935	0.392567	0.384995	0.0252509	0.159793	0.873044	MA0719.1	RHOXF1	ENSG00000101883	Homeodomain	-1.53912	0.185382	CD4_8hr_vs_unstim	NS
MA1106.1.HIF1A	1608	1.07342	1.14253	1.71697	1.84218	0.194323	0.981979	0.32611	MA1106.1	HIF1A	ENSG00000100644	bHLH	2.61476	1.16717e-05	CD4_8hr_vs_unstim	expression
MA1544.1.OVOL1	323	-0.565075	-0.599047	1.23492	1.15966	-0.109232	-0.494188	0.621174	MA1544.1	OVOL1	ENSG00000172818	C2H2 ZF	-0.0513803	0.999946	CD4_8hr_vs_unstim	NS
MA1153.1.Smad4	5238	0.158836	0.14389	0.594898	0.628467	0.0186221	0.127557	0.898499	MA1153.1	SMAD4	ENSG00000141646	SMAD	-0.3268	0.758564	CD4_8hr_vs_unstim	NS
MA0065.2.Pparg::Rxra	6566	0.629772	0.645149	0.647738	0.647953	0.0155926	0.112825	0.910169	MA0065.2	PPARG	ENSG00000132170	Nuclear receptor	-0.0190195	0.999946	CD4_8hr_vs_unstim	NS
MA0065.2.Pparg::Rxra	6566	0.629772	0.645149	0.647738	0.647953	0.0155926	0.112825	0.910169	MA0065.2	RXRA	ENSG00000186350	Nuclear receptor	-0.477404	0.303767	CD4_8hr_vs_unstim	NS
MA0898.1.Hmx3	2699	0.362142	0.331991	0.448804	0.40798	-0.0709745	-0.308146	0.757971	MA0898.1	HMX3	ENSG00000188620	Homeodomain	-0.0371972	0.999946	CD4_8hr_vs_unstim	NS
MA1561.1.SOX12	2332	0.473657	0.514764	0.620472	0.681675	0.102311	0.53453	0.592975	MA1561.1	SOX12	ENSG00000177732	Sox	-0.387641	0.571558	CD4_8hr_vs_unstim	NS
MA0036.3.GATA2	3390	0.373026	0.381051	0.495694	0.501843	0.0141736	0.105924	0.915642	MA0036.3	GATA2	ENSG00000179348	GATA	0.086839	0.999946	CD4_8hr_vs_unstim	NS
MA1511.1.KLF10	2824	1.0253	1.14075	1.0024	1.1034	0.216452	1.08959	0.275893	MA1511.1	KLF10	ENSG00000155090	C2H2 ZF	5.45945	8.38319e-10	CD4_8hr_vs_unstim	expression
MA1114.1.PBX3	6128	0.157696	0.22609	0.806395	0.814723	0.0767226	0.410097	0.681735	MA1114.1	PBX3	ENSG00000167081	Homeodomain	-0.521865	0.220944	CD4_8hr_vs_unstim	NS
MA0098.3.ETS1	769	0.196858	0.139334	1.27026	1.54461	0.216825	1.09141	0.275095	MA0098.3	ETS1	ENSG00000134954	Ets	-1.27007	0.012751	CD4_8hr_vs_unstim	expression
MA1515.1.KLF2	4372	1.29155	1.36772	1.81044	1.95436	0.220083	1.10725	0.268186	MA1515.1	KLF2	ENSG00000127528	C2H2 ZF	-3.70109	2.13983e-06	CD4_8hr_vs_unstim	expression
MA0107.1.RELA	6610	-0.698548	-0.53698	0.821924	0.623683	-0.0366725	-0.141337	0.887604	MA0107.1	RELA	ENSG00000173039	Rel	0.855763	0.0931348	CD4_8hr_vs_unstim	NS
MA0853.1.Alx4	2005	0.459619	0.360417	0.551331	0.47481	-0.175724	-0.817535	0.413623	MA0853.1	ALX4	ENSG00000052850	Homeodomain	-0.0991216	0.999946	CD4_8hr_vs_unstim	NS
MA0148.4.FOXA1	6604	0.300315	0.383395	0.468465	0.527784	0.142399	0.729477	0.46571	MA0148.4	FOXA1	ENSG00000129514	Forkhead	-0.397854	0.944052	CD4_8hr_vs_unstim	NS
MA1108.2.MXI1	5659	0.387833	0.351597	0.477081	0.450372	-0.0629457	-0.269103	0.787851	MA1108.2	MXI1	ENSG00000119950	bHLH	-0.153703	0.999946	CD4_8hr_vs_unstim	NS
MA0485.2.HOXC9	80	0.289981	0.296598	0.440289	0.407778	-0.0258946	-0.0889253	0.929141	MA0485.2	HOXC9	ENSG00000180806	Homeodomain	-0.387748	0.961559	CD4_8hr_vs_unstim	NS
MA0525.2.TP63	2085	0.327636	0.373092	0.683879	0.680724	0.0423005	0.242704	0.808235	MA0525.2	TP63	ENSG00000073282	p53	-0.101995	0.999946	CD4_8hr_vs_unstim	NS
MA1607.1.Foxl2	6793	0.328142	0.400578	0.470806	0.516541	0.118171	0.611658	0.540764	MA1607.1	FOXL2	ENSG00000183770	Forkhead	-0.157832	0.999946	CD4_8hr_vs_unstim	NS
MA0521.1.Tcf12	12338	-0.410846	-0.471609	0.739247	0.806794	0.00678474	0.0699927	0.944199	MA0521.1	TCF12	ENSG00000140262	bHLH	0.0616087	0.999946	CD4_8hr_vs_unstim	NS
MA0103.3.ZEB1	5105	0.301818	0.333899	0.749424	0.783352	0.066009	0.357997	0.720346	MA0103.3	ZEB1	ENSG00000148516	C2H2 ZF,Homeodomain	0.0845778	0.999946	CD4_8hr_vs_unstim	NS
MA0780.1.PAX3	3073	0.454053	0.38103	0.420401	0.360519	-0.132906	-0.609313	0.542317	MA0780.1	PAX3	ENSG00000135903	Homeodomain,Paired box	-0.217047	0.999946	CD4_8hr_vs_unstim	NS
MA0830.2.TCF4	10094	0.318723	0.326035	0.831355	0.910594	0.0865506	0.457889	0.647032	MA0830.2	TCF4	ENSG00000196628	bHLH	-0.550455	0.344593	CD4_8hr_vs_unstim	NS
MA0645.1.ETV6	2165	0.0779052	0.0557581	1.48773	1.66557	0.155689	0.794105	0.427134	MA0645.1	ETV6	ENSG00000139083	Ets	0.38932	0.569905	CD4_8hr_vs_unstim	NS
MA0006.1.Ahr::Arnt	6319	0.516373	0.593325	1.60733	1.75197	0.221598	1.11462	0.265015	MA0006.1	AHR	ENSG00000106546	bHLH	3.61778	2.18404e-07	CD4_8hr_vs_unstim	expression
MA0610.1.DMRT3	3882	0.347507	0.331167	0.389666	0.366187	-0.039819	-0.156639	0.87553	MA0610.1	DMRT3	ENSG00000064218	DM	0.00320546	0.999946	CD4_8hr_vs_unstim	NS
MA0511.2.RUNX2	5798	0.168686	0.265896	0.831831	0.968766	0.234144	1.17563	0.239745	MA0511.2	RUNX2	ENSG00000124813	Runt	-0.965906	0.00738347	CD4_8hr_vs_unstim	expression
MA1512.1.KLF11	3641	1.0764	1.20229	1.47973	1.59477	0.24093	1.20863	0.226806	MA1512.1	KLF11	ENSG00000172059	C2H2 ZF	1.13131	0.00912531	CD4_8hr_vs_unstim	expression
MA0852.2.FOXK1	4975	0.358967	0.447328	0.565222	0.676161	0.1993	1.00618	0.314328	MA0852.2	FOXK1	ENSG00000164916	Forkhead	0.690309	0.220233	CD4_8hr_vs_unstim	NS
MA0869.1.Sox11	4501	-0.0192965	-0.0252043	0.447423	0.413349	-0.0399824	-0.157433	0.874904	MA0869.1	SOX11	ENSG00000176887	Sox	-0.360749	0.925116	CD4_8hr_vs_unstim	NS
MA1618.1.Ptf1a	6036	0.367289	0.368308	0.526708	0.540696	0.015007	0.109977	0.912428	MA1618.1	PTF1A	ENSG00000168267	bHLH	0.38936	0.964058	CD4_8hr_vs_unstim	NS
MA0678.1.OLIG2	1186	0.273431	0.323225	0.391758	0.409024	0.0670604	0.36311	0.716523	MA0678.1	OLIG2	ENSG00000205927	bHLH	-0.0804839	0.999946	CD4_8hr_vs_unstim	NS
MA0627.2.POU2F3	7669	0.631097	0.566794	0.518115	0.45931	-0.123107	-0.561662	0.574346	MA0627.2	POU2F3	ENSG00000137709	Homeodomain,POU	-0.0947563	0.999946	CD4_8hr_vs_unstim	NS
MA0644.1.ESX1	2946	0.578626	0.521571	0.586035	0.557393	-0.0856959	-0.379735	0.704142	MA0644.1	ESX1	ENSG00000123576	Homeodomain	0.130147	0.999946	CD4_8hr_vs_unstim	NS
MA1565.1.TBX18	8326	0.502198	0.510467	0.715153	0.697886	-0.00899798	-0.00675776	0.994608	MA1565.1	TBX18	ENSG00000112837	T-box	-0.150709	0.999946	CD4_8hr_vs_unstim	NS
MA0809.2.TEAD4	4985	0.170127	0.174738	0.456981	0.420643	-0.0317276	-0.11729	0.90663	MA0809.2	TEAD4	ENSG00000197905	TEA	0.252526	0.962885	CD4_8hr_vs_unstim	NS
MA1650.1.ZBTB14	7711	0.267199	0.313918	2.37422	2.57019	0.242684	1.21716	0.223544	MA1650.1	ZBTB14	ENSG00000198081	C2H2 ZF	-1.15324	0.00426004	CD4_8hr_vs_unstim	expression
MA0760.1.ERF	2449	0.136352	0.0828297	0.960933	1.26373	0.249273	1.2492	0.211592	MA0760.1	ERF	ENSG00000105722	Ets	1.97147	0.000161561	CD4_8hr_vs_unstim	expression
MA1147.1.NR4A2::RXRA	837	0.212379	0.175989	0.790831	0.790979	-0.0362425	-0.139246	0.889256	MA1147.1	RXRA	ENSG00000186350	Nuclear receptor	-0.477404	0.303767	CD4_8hr_vs_unstim	NS
MA0867.2.SOX4	9132	0.57206	0.607312	0.592472	0.623233	0.066013	0.358017	0.720331	MA0867.2	SOX4	ENSG00000124766	Sox	-0.788521	0.0656265	CD4_8hr_vs_unstim	NS
MA1619.1.Ptf1a(var.2)	461	-0.469648	-0.589033	0.976635	1.04313	-0.0528944	-0.220224	0.825697	MA1619.1	PTF1A	ENSG00000168267	bHLH	0.38936	0.964058	CD4_8hr_vs_unstim	NS
MA0879.1.Dlx1	793	0.340764	0.22331	0.459171	0.380533	-0.196092	-0.916587	0.359359	MA0879.1	DLX1	ENSG00000144355	Homeodomain	-0.570137	0.833064	CD4_8hr_vs_unstim	NS
MA0803.1.TBX15	219	0.795534	0.792411	1.24573	1.29156	0.0427041	0.244667	0.806715	MA0803.1	TBX15	ENSG00000092607	T-box	-0.244811	0.999946	CD4_8hr_vs_unstim	NS
MA0471.2.E2F6	14672	1.33919	1.45229	1.7272	1.87487	0.260763	1.30507	0.191867	MA0471.2	E2F6	ENSG00000169016	E2F	2.12526	6.00137e-06	CD4_8hr_vs_unstim	expression
MA1651.1.ZFP42	3433	0.430001	0.430469	0.95937	0.985699	0.0267968	0.16731	0.867126	MA1651.1	ZFP42	ENSG00000179059	C2H2 ZF	0.14971	0.999946	CD4_8hr_vs_unstim	NS
MA0697.1.ZIC3	1903	0.400319	0.443778	1.46411	1.58619	0.16554	0.842008	0.399783	MA0697.1	ZIC3	ENSG00000156925	C2H2 ZF	-0.496579	0.876349	CD4_8hr_vs_unstim	NS
MA0506.1.NRF1	11898	1.88484	1.97966	2.92534	3.0927	0.26218	1.31196	0.189532	MA0506.1	NRF1	ENSG00000106459	Unknown	0.930357	0.0265575	CD4_8hr_vs_unstim	expression
MA0622.1.Mlxip	4432	0.222475	0.247356	1.41955	1.45983	0.0651556	0.353847	0.723454	MA0622.1	MLXIP	ENSG00000175727	bHLH	0.0155224	0.999946	CD4_8hr_vs_unstim	NS
MA0724.1.VENTX	2194	0.619192	0.578454	0.548587	0.504629	-0.0846961	-0.374873	0.707755	MA0724.1	VENTX	ENSG00000151650	Homeodomain	0.0270074	0.999946	CD4_8hr_vs_unstim	NS
MA1484.1.ETS2	5602	-1.00268	-1.06019	1.60875	1.93418	0.26792	1.33988	0.180285	MA1484.1	ETS2	ENSG00000157557	Ets	2.31816	1.26911e-05	CD4_8hr_vs_unstim	expression
MA1103.2.FOXK2	5769	0.365174	0.519197	0.528092	0.64363	0.269562	1.34786	0.177703	MA1103.2	FOXK2	ENSG00000141568	Forkhead	1.89447	0.000353582	CD4_8hr_vs_unstim	expression
MA0162.4.EGR1	17327	1.26952	1.37677	2.03456	2.20322	0.275912	1.37874	0.167975	MA0162.4	EGR1	ENSG00000120738	C2H2 ZF	6.27166	5.90733e-11	CD4_8hr_vs_unstim	expression
MA0795.1.SMAD3	1166	0.167595	0.166376	0.540134	0.53997	-0.00138268	0.030275	0.975848	MA0795.1	SMAD3	ENSG00000166949	SMAD	0.212627	0.961789	CD4_8hr_vs_unstim	NS
MA0815.1.TFAP2C(var.3)	8474	0.323337	0.330284	1.47968	1.57777	0.105034	0.547775	0.583846	MA0815.1	TFAP2C	ENSG00000087510	AP-2	-0.323024	0.999946	CD4_8hr_vs_unstim	NS
MA1146.1.NR1H4::RXRA	798	0.184562	0.144484	0.542076	0.496328	-0.0858253	-0.380365	0.703675	MA1146.1	NR1H4	ENSG00000012504	Nuclear receptor	-0.360304	0.986673	CD4_8hr_vs_unstim	NS
MA1146.1.NR1H4::RXRA	798	0.184562	0.144484	0.542076	0.496328	-0.0858253	-0.380365	0.703675	MA1146.1	RXRA	ENSG00000186350	Nuclear receptor	-0.477404	0.303767	CD4_8hr_vs_unstim	NS
MA0152.1.NFATC2	6604	0.463125	0.328436	0.527152	0.39295	-0.268892	-1.27061	0.203869	MA0152.1	NFATC2	ENSG00000101096	Rel	-0.198067	0.985136	CD4_8hr_vs_unstim	NS
MA0516.2.SP2	12822	1.5306	1.64708	1.92587	2.0987	0.289317	1.44393	0.148758	MA0516.2	SP2	ENSG00000167182	C2H2 ZF	1.04227	0.0243831	CD4_8hr_vs_unstim	expression
MA1648.1.TCF12(var.2)	11337	0.715209	0.759905	1.25365	1.35586	0.146913	0.751428	0.452395	MA1648.1	TCF12	ENSG00000140262	bHLH	0.0616087	0.999946	CD4_8hr_vs_unstim	NS
MA0901.2.HOXB13	7957	0.380149	0.371695	0.427783	0.411842	-0.0243947	-0.0816311	0.93494	MA0901.2	HOXB13	ENSG00000159184	Homeodomain	-0.362645	0.971989	CD4_8hr_vs_unstim	NS
MA0024.3.E2F1	1239	0.112689	0.121257	1.65844	1.75536	0.105486	0.549973	0.582338	MA0024.3	E2F1	ENSG00000101412	E2F	0.100226	0.999946	CD4_8hr_vs_unstim	NS
MA1122.1.TFDP1	7557	0.733041	0.804797	2.39858	2.62073	0.293911	1.46627	0.142575	MA1122.1	TFDP1	ENSG00000198176	E2F	1.39236	0.00526751	CD4_8hr_vs_unstim	expression
MA1516.1.KLF3	9546	0.886476	0.979036	1.98305	2.1984	0.307906	1.53433	0.124949	MA1516.1	KLF3	ENSG00000109787	C2H2 ZF	-1.88291	0.000208019	CD4_8hr_vs_unstim	expression
MA0503.1.Nkx2-5(var.2)	7009	0.0596086	0.062338	0.611927	0.628037	0.0188402	0.128618	0.89766	MA0503.1	NKX2-5	ENSG00000183072	Homeodomain	-0.476655	0.950245	CD4_8hr_vs_unstim	NS
MA0081.2.SPIB	18637	0.832332	0.908234	0.84408	0.919339	0.15116	0.772082	0.440066	MA0081.2	SPIB	ENSG00000269404	Ets	-0.306414	0.976396	CD4_8hr_vs_unstim	NS
MA0062.3.GABPA	17605	0.575072	0.71096	0.881985	1.0873	0.341201	1.69624	0.0898407	MA0062.3	GABPA	ENSG00000154727	Ets	0.925817	0.0368966	CD4_8hr_vs_unstim	expression
MA0911.1.Hoxa11	1871	0.174281	0.141243	0.536883	0.452135	-0.117785	-0.535785	0.592107	MA0911.1	HOXA11	ENSG00000005073	Homeodomain	-0.0130906	0.999946	CD4_8hr_vs_unstim	NS
MA0742.1.Klf12	7800	1.20313	1.3457	1.92746	2.15886	0.373968	1.85558	0.0635129	MA0742.1	KLF12	ENSG00000118922	C2H2 ZF	-1.80057	0.000503565	CD4_8hr_vs_unstim	expression
MA0732.1.EGR3	8171	1.63287	1.8249	2.10745	2.29564	0.380226	1.88602	0.0592927	MA0732.1	EGR3	ENSG00000179388	C2H2 ZF	6.91117	5.18416e-11	CD4_8hr_vs_unstim	expression
MA0594.2.HOXA9	150	-0.205474	-0.516328	1.27617	1.42672	-0.160305	-0.742555	0.457751	MA0594.2	HOXA9	ENSG00000078399	Homeodomain	0.106467	0.999946	CD4_8hr_vs_unstim	NS
MA0904.2.HOXB5	593	1.11957	0.896291	0.643338	0.541321	-0.325297	-1.5449	0.12237	MA0904.2	HOXB5	ENSG00000120075	Homeodomain	0.0021401	0.999946	CD4_8hr_vs_unstim	NS
MA0143.4.SOX2	5358	0.209115	0.199952	0.457688	0.438095	-0.0287567	-0.102843	0.918087	MA0143.4	SOX2	ENSG00000181449	Sox	-0.108516	0.999946	CD4_8hr_vs_unstim	NS
MA1639.1.MEIS1(var.2)	1976	0.670745	0.527621	0.55406	0.458542	-0.238641	-1.1235	0.261226	MA1639.1	MEIS1	ENSG00000143995	Homeodomain	0.0344438	0.999946	CD4_8hr_vs_unstim	NS
MA0764.2.ETV4	21101	0.705489	0.840918	0.864757	1.0425	0.31317	1.55993	0.118777	MA0764.2	ETV4	ENSG00000175832	Ets	0.0111178	0.999946	CD4_8hr_vs_unstim	NS
MA0899.1.HOXA10	4782	0.346455	0.319796	0.417429	0.397153	-0.0469346	-0.191242	0.848336	MA0899.1	HOXA10	ENSG00000253293	Homeodomain	0.0230345	0.999946	CD4_8hr_vs_unstim	NS
MA0741.1.KLF16	25301	1.50131	1.68129	2.04817	2.25657	0.388381	1.92567	0.0541451	MA0741.1	KLF16	ENSG00000129911	C2H2 ZF	2.11737	8.3705e-05	CD4_8hr_vs_unstim	expression
MA0073.1.RREB1	21761	0.851241	0.895244	0.905806	0.964739	0.102935	0.537565	0.590877	MA0073.1	RREB1	ENSG00000124782	C2H2 ZF	0.664233	0.255636	CD4_8hr_vs_unstim	NS
MA0492.1.JUND(var.2)	5986	0.812745	0.761322	0.846808	0.822857	-0.0753743	-0.329542	0.741746	MA0492.1	JUND	ENSG00000130522	bZIP	0.829847	0.100959	CD4_8hr_vs_unstim	NS
MA1566.1.TBX3	3745	0.540961	0.548041	0.79162	0.818971	0.0344297	0.204429	0.838019	MA1566.1	TBX3	ENSG00000135111	T-box	-0.486082	0.815046	CD4_8hr_vs_unstim	NS
MA0060.3.NFYA	519	2.16126	2.29139	2.49438	2.7728	0.408562	2.02381	0.0429893	MA0060.3	NFYA	ENSG00000001167	CBF/NF-Y	1.19713	0.0101063	CD4_8hr_vs_unstim	both
MA0047.3.FOXA2	492	0.284472	0.177811	0.387626	0.400391	-0.0938946	-0.419605	0.674774	MA0047.3	FOXA2	ENSG00000125798	Forkhead	-0.154363	0.999946	CD4_8hr_vs_unstim	NS
MA0685.1.SP4	11691	1.52276	1.65117	2.44245	2.73154	0.417497	2.06726	0.0387094	MA0685.1	SP4	ENSG00000105866	C2H2 ZF	-0.418984	0.514865	CD4_8hr_vs_unstim	footprint
MA0632.2.TCFL5	6107	2.18563	2.38869	2.68266	2.89786	0.418256	2.07095	0.0383632	MA0632.2	TCFL5	ENSG00000101190	bHLH	-0.0554614	0.999946	CD4_8hr_vs_unstim	footprint
MA0808.1.TEAD3	3583	0.125674	0.107177	0.52443	0.522242	-0.0206849	-0.0635906	0.949296	MA0808.1	TEAD3	ENSG00000007866	TEA	0.759626	0.196993	CD4_8hr_vs_unstim	NS
MA0711.1.OTX1	1774	0.134849	0.108985	0.613461	0.596655	-0.0426698	-0.170502	0.864616	MA0711.1	OTX1	ENSG00000115507	Homeodomain	-0.00137827	0.999946	CD4_8hr_vs_unstim	NS
MA0069.1.PAX6	2284	0.365436	0.364858	0.601687	0.570816	-0.0314485	-0.115933	0.907705	MA0069.1	PAX6	ENSG00000007372	Homeodomain,Paired box	-0.235369	0.993925	CD4_8hr_vs_unstim	NS
MA1564.1.SP9	20815	1.40231	1.56999	2.375	2.63903	0.431708	2.13637	0.0326494	MA1564.1	SP9	ENSG00000217236	C2H2 ZF	-0.233856	0.999946	CD4_8hr_vs_unstim	footprint
MA0157.2.FOXO3	5373	0.616747	0.900926	0.579344	0.738395	0.44323	2.1924	0.0283507	MA0157.2	FOXO3	ENSG00000118689	Forkhead	-0.269559	0.768508	CD4_8hr_vs_unstim	footprint
MA1644.1.NFYC	6110	2.05399	2.26549	2.00462	2.2367	0.443583	2.19412	0.0282271	MA1644.1	NFYC	ENSG00000066136	Unknown	0.770591	0.119207	CD4_8hr_vs_unstim	footprint
MA0512.2.Rxra	258	-0.263011	-0.172003	0.640976	0.628337	0.0783688	0.418102	0.675873	MA0512.2	RXRA	ENSG00000186350	Nuclear receptor	-0.477404	0.303767	CD4_8hr_vs_unstim	NS
MA0798.2.RFX3	1204	0.297215	0.290899	0.834954	0.919532	0.0782617	0.417581	0.676253	MA0798.2	RFX3	ENSG00000080298	RFX	-0.578199	0.181779	CD4_8hr_vs_unstim	NS
MA1563.1.SOX18	4020	-0.247025	-0.225283	0.654747	0.660088	0.0270831	0.168702	0.866031	MA1563.1	SOX18	ENSG00000203883	Sox	-0.408284	0.966416	CD4_8hr_vs_unstim	NS
MA0876.1.BSX	580	0.385441	0.375387	0.43616	0.390205	-0.0560091	-0.23537	0.813921	MA0876.1	BSX	ENSG00000188909	Homeodomain	-0.342366	0.987944	CD4_8hr_vs_unstim	NS
MA1104.2.GATA6	5562	0.487114	0.493562	0.473545	0.473762	0.00666523	0.0694115	0.944662	MA1104.2	GATA6	ENSG00000141448	GATA	-0.071634	0.999946	CD4_8hr_vs_unstim	NS
MA1540.1.NR5A1	4577	0.215712	0.248859	0.617502	0.618616	0.0342607	0.203607	0.838661	MA1540.1	NR5A1	ENSG00000136931	Nuclear receptor	0.155032	0.999946	CD4_8hr_vs_unstim	NS
MA1522.1.MAZ	23747	2.21276	2.46685	2.00957	2.20469	0.449214	2.2215	0.0263171	MA1522.1	MAZ	ENSG00000103495	C2H2 ZF	0.589113	0.385136	CD4_8hr_vs_unstim	footprint
MA0076.2.ELK4	3556	0.338766	0.480786	1.53465	1.84319	0.450555	2.22802	0.0258791	MA0076.2	ELK4	ENSG00000158711	Ets	0.926601	0.090393	CD4_8hr_vs_unstim	footprint
MA1630.1.Znf281	14234	1.41769	1.56993	1.29273	1.3823	0.241816	1.21294	0.225154	MA1630.1	ZNF281	ENSG00000162702	C2H2 ZF	0.74992	0.121048	CD4_8hr_vs_unstim	NS
MA0847.2.FOXD2	7072	0.520295	0.568441	0.459096	0.491017	0.0800658	0.426354	0.66985	MA0847.2	FOXD2	ENSG00000186564	Forkhead	-0.0430788	0.999946	CD4_8hr_vs_unstim	NS
MA0079.4.SP1	14317	1.41499	1.57244	2.37262	2.67292	0.457741	2.26297	0.0236377	MA0079.4	SP1	ENSG00000185591	C2H2 ZF	0.301974	0.87202	CD4_8hr_vs_unstim	footprint
MA1474.1.CREB3L4	1858	0.41326	0.463579	1.56115	1.68709	0.176268	0.894178	0.371227	MA1474.1	CREB3L4	ENSG00000143578	bZIP	-0.80608	0.13659	CD4_8hr_vs_unstim	NS
MA0142.1.Pou5f1::Sox2	7680	0.416661	0.382797	0.473403	0.416561	-0.0907066	-0.404102	0.686138	MA0142.1	POU5F1	ENSG00000204531	Homeodomain,POU	0.21276	0.999946	CD4_8hr_vs_unstim	NS
MA0142.1.Pou5f1::Sox2	7680	0.416661	0.382797	0.473403	0.416561	-0.0907066	-0.404102	0.686138	MA0142.1	SOX2	ENSG00000181449	Sox	-0.108516	0.999946	CD4_8hr_vs_unstim	NS
MA0497.1.MEF2C	8732	0.432341	0.416149	0.457635	0.426499	-0.0473282	-0.193156	0.846837	MA0497.1	MEF2C	ENSG00000081189	MADS box	-0.534388	0.69613	CD4_8hr_vs_unstim	NS
MA0032.2.FOXC1	8118	0.495925	0.543076	0.457039	0.493667	0.0837784	0.444409	0.656747	MA0032.2	FOXC1	ENSG00000054598	Forkhead	0.238321	0.999946	CD4_8hr_vs_unstim	NS
MA0030.1.FOXF2	2642	0.377941	0.40814	0.547396	0.580282	0.063085	0.343778	0.731013	MA0030.1	FOXF2	ENSG00000137273	Forkhead	0.078593	0.999946	CD4_8hr_vs_unstim	NS
MA1487.1.FOXE1	5772	0.499689	0.607589	0.521535	0.59655	0.182915	0.926504	0.354184	MA1487.1	FOXE1	ENSG00000178919	Forkhead	-0.161537	0.999946	CD4_8hr_vs_unstim	NS
MA0762.1.ETV2	6430	0.355797	0.474637	1.07344	1.30416	0.349567	1.73692	0.0824004	MA0762.1	ETV2	ENSG00000105672	Ets	0.268616	0.999946	CD4_8hr_vs_unstim	NS
MA0735.1.GLIS1	1573	0.0918863	0.104723	1.38386	1.48419	0.11317	0.587337	0.556977	MA0735.1	GLIS1	ENSG00000174332	C2H2 ZF	-0.0478093	0.999946	CD4_8hr_vs_unstim	NS
MA0502.2.NFYB	5984	1.82673	2.02892	2.13993	2.39867	0.460928	2.27847	0.0226988	MA0502.2	NFYB	ENSG00000120837	Unknown	0.510591	0.278337	CD4_8hr_vs_unstim	footprint
MA0514.1.Sox3	5610	0.84902	0.884543	0.665046	0.672957	0.043434	0.248216	0.803967	MA0514.1	SOX3	ENSG00000134595	Sox	-0.516369	0.845229	CD4_8hr_vs_unstim	NS
MA1538.1.NR2F1(var.3)	733	-0.260122	-0.258186	0.827013	0.833645	0.00856751	0.0786622	0.937301	MA1538.1	NR2F1	ENSG00000175745	Nuclear receptor	-0.243955	0.999946	CD4_8hr_vs_unstim	NS
MA0004.1.Arnt	10168	0.489457	0.505881	1.49801	1.56052	0.0789273	0.420818	0.673888	MA0004.1	ARNT	ENSG00000143437	bHLH	-0.571555	0.262411	CD4_8hr_vs_unstim	NS
MA0779.1.PAX1	1388	0.595611	0.587509	0.964283	0.986692	0.0143082	0.106579	0.915123	MA0779.1	PAX1	ENSG00000125813	Paired box	0.035217	0.999946	CD4_8hr_vs_unstim	NS
MA1509.1.IRF6	1253	0.283439	0.250364	1.12895	1.03242	-0.129601	-0.593245	0.553017	MA1509.1	IRF6	ENSG00000117595	IRF	-0.279854	0.969537	CD4_8hr_vs_unstim	NS
MA0109.1.HLTF	4256	0.320691	0.329626	0.453767	0.408906	-0.0359252	-0.137703	0.890475	MA0109.1	HLTF	ENSG00000071794	NA	-0.568895	0.200461	CD4_8hr_vs_unstim	NS
MA1534.1.NR1I3	4667	0.126498	0.131084	0.533022	0.508253	-0.0201829	-0.0611495	0.95124	MA1534.1	NR1I3	ENSG00000143257	Nuclear receptor	-0.279508	0.999946	CD4_8hr_vs_unstim	NS
MA0140.2.GATA1::TAL1	3102	0.208356	0.22818	0.496268	0.511432	0.0349879	0.207143	0.835898	MA0140.2	GATA1	ENSG00000102145	GATA	0.100458	0.999946	CD4_8hr_vs_unstim	NS
MA0140.2.GATA1::TAL1	3102	0.208356	0.22818	0.496268	0.511432	0.0349879	0.207143	0.835898	MA0140.2	TAL1	ENSG00000162367	bHLH	-0.332975	0.918645	CD4_8hr_vs_unstim	NS
MA0861.1.TP73	1388	0.266325	0.286752	0.559512	0.554944	0.0158584	0.114117	0.909145	MA0861.1	TP73	ENSG00000078900	p53	-0.0508303	0.999946	CD4_8hr_vs_unstim	NS
MA1102.2.CTCFL	16138	1.04022	1.12418	1.65733	1.75582	0.182456	0.924271	0.355345	MA1102.2	CTCFL	ENSG00000124092	C2H2 ZF	-0.356549	0.960413	CD4_8hr_vs_unstim	NS
MA0615.1.Gmeb1	479	1.40627	1.55057	1.96533	2.292	0.470966	2.32728	0.0199505	MA0615.1	GMEB1	ENSG00000162419	SAND	1.56584	0.000830972	CD4_8hr_vs_unstim	both
MA0891.1.GSC2	550	0.38172	0.427355	0.47137	0.495026	0.0692906	0.373955	0.708438	MA0891.1	GSC2	ENSG00000063515	Homeodomain	-0.141924	0.999946	CD4_8hr_vs_unstim	NS
MA0676.1.Nr2e1	7362	0.207838	0.223789	0.529454	0.50243	-0.0110745	-0.0168558	0.986552	MA0676.1	NR2E1	ENSG00000112333	Nuclear receptor	0.141765	0.999946	CD4_8hr_vs_unstim	NS
MA0772.1.IRF7	11773	0.431778	0.355586	0.711179	0.541171	-0.2462	-1.16026	0.245945	MA0772.1	IRF7	ENSG00000185507	IRF	-0.12922	0.999946	CD4_8hr_vs_unstim	NS
MA0746.2.SP3	18926	1.66982	1.88732	2.35499	2.63327	0.495781	2.44795	0.0143671	MA0746.2	SP3	ENSG00000172845	C2H2 ZF	-0.109485	0.999946	CD4_8hr_vs_unstim	footprint
MA0613.1.FOXG1	2083	0.198053	0.280569	0.472506	0.486018	0.0960291	0.503983	0.614273	MA0613.1	FOXG1	ENSG00000176165	Forkhead	-0.16485	0.999946	CD4_8hr_vs_unstim	NS
MA1530.1.NKX6-3	4410	0.517712	0.39465	0.446163	0.360412	-0.208812	-0.978444	0.327855	MA1530.1	NKX6-3	ENSG00000165066	Homeodomain	0.0734036	0.999946	CD4_8hr_vs_unstim	NS
MA0687.1.SPIC	10042	0.68476	0.696566	0.72675	0.771944	0.0569999	0.314186	0.75338	MA0687.1	SPIC	ENSG00000166211	Ets	-0.668734	0.814781	CD4_8hr_vs_unstim	NS
MA0028.2.ELK1	184	2.18333	2.3635	2.9827	3.33288	0.530358	2.6161	0.00889411	MA0028.2	ELK1	ENSG00000126767	Ets	1.36127	0.00433088	CD4_8hr_vs_unstim	both
MA0850.1.FOXP3	3666	0.843978	1.1828	0.624232	0.819034	0.533625	2.63199	0.00848867	MA0850.1	FOXP3	ENSG00000049768	Forkhead	0.913274	0.0624278	CD4_8hr_vs_unstim	footprint
MA0832.1.Tcf21	4272	-0.0940108	-0.128552	0.577711	0.60366	-0.00859214	-0.00478422	0.996183	MA0832.1	TCF21	ENSG00000118526	bHLH	-0.479103	0.896147	CD4_8hr_vs_unstim	NS
MA1599.1.ZNF682	7020	0.418152	0.453391	1.51378	1.61908	0.140532	0.7204	0.471279	MA1599.1	ZNF682	ENSG00000197124	C2H2 ZF	-0.376791	0.697706	CD4_8hr_vs_unstim	NS
MA0074.1.RXRA::VDR	1912	0.126058	0.132609	0.661153	0.660202	0.00560123	0.0642373	0.948781	MA0074.1	RXRA	ENSG00000186350	Nuclear receptor	-0.477404	0.303767	CD4_8hr_vs_unstim	NS
MA0472.2.EGR2	6253	1.59517	2.03001	2.06328	2.26132	0.632882	3.11467	0.00184152	MA0472.2	EGR2	ENSG00000122877	C2H2 ZF	6.50289	6.7534e-11	CD4_8hr_vs_unstim	both
MA0712.2.OTX2	3449	0.205131	0.185558	0.426981	0.396348	-0.0502067	-0.207153	0.83589	MA0712.2	OTX2	ENSG00000165588	Homeodomain	-0.167031	0.999946	CD4_8hr_vs_unstim	NS
MA0259.1.ARNT::HIF1A	1888	0.887105	0.920556	1.55883	1.67704	0.151659	0.774506	0.438632	MA0259.1	ARNT	ENSG00000143437	bHLH	-0.571555	0.262411	CD4_8hr_vs_unstim	NS
MA0604.1.Atf1	1989	1.88907	2.15862	2.51676	2.88925	0.64205	3.15925	0.00158175	MA0604.1	ATF1	ENSG00000123268	bZIP	1.35193	0.00240185	CD4_8hr_vs_unstim	both

## Sheet: 8hr vs 24hr
Motif	Num	Protection_Score_24hr	Protection_Score_8hr	TC_24hr	TC_8hr	TF_Activity	Z_score	P_values	motif_id	gene_name	gene_id	TF_family	TF expression_logFC	TF_expression_FDR	comp	class
MA0474.2.ERG	98	-5.81787	-6.94859	3.02408	3.44844	-0.706361	-4.07231	4.65499e-05	MA0474.2	ERG	ENSG00000157554	Ets	-1.24721	0.0731492	CD4_24hr_vs_8hr	footprint
MA1620.1.Ptf1a(var.3)	7165	-0.00168888	0.0216767	0.648643	0.654277	0.0289999	-0.150343	0.880494	MA1620.1	PTF1A	ENSG00000168267	bHLH	-0.98541	0.200858	CD4_24hr_vs_8hr	NS
MA1105.2.GRHL2	4295	-0.15432	-0.149677	0.638277	0.615453	-0.0181809	-0.401977	0.687701	MA1105.2	GRHL2	ENSG00000083307	Grainyhead	-1.22437	0.119469	CD4_24hr_vs_8hr	NS
MA0888.1.EVX2	13	0.867238	0.541973	0.752703	0.56216	-0.515808	-3.05602	0.002243	MA0888.1	EVX2	ENSG00000174279	Homeodomain	-1.29961	0.126053	CD4_24hr_vs_8hr	footprint
MA1418.1.IRF3	9686	0.869827	0.808625	0.9076	0.842269	-0.126533	-0.97986	0.327155	MA1418.1	IRF3	ENSG00000126456	IRF	1.40784	0.00123595	CD4_24hr_vs_8hr	expression
MA0512.2.Rxra	277	-0.0796345	-0.0986259	0.7173	0.707401	-0.028891	-0.459098	0.646164	MA0512.2	RXRA	ENSG00000186350	Nuclear receptor	0.014903	0.967727	CD4_24hr_vs_8hr	NS
MA0032.2.FOXC1	8183	0.560625	0.540763	0.513902	0.487957	-0.0458078	-0.549322	0.582784	MA0032.2	FOXC1	ENSG00000054598	Forkhead	-1.02791	0.168898	CD4_24hr_vs_8hr	NS
MA0051.1.IRF2	8254	0.644594	0.600939	0.884992	0.821227	-0.10742	-0.877926	0.379984	MA0051.1	IRF2	ENSG00000168310	IRF	1.46965	0.00131009	CD4_24hr_vs_8hr	expression
MA0151.1.Arid3a	15338	0.543895	0.492733	0.528729	0.475214	-0.104677	-0.863292	0.387977	MA0151.1	ARID3A	ENSG00000116017	ARID/BRIGHT	1.21686	0.00245322	CD4_24hr_vs_8hr	expression
MA0089.2.NFE2L1	8648	0.240641	0.235179	0.741535	0.781974	0.0349776	-0.118462	0.905701	MA0089.2	NFE2L1	ENSG00000082641	bZIP	0.585028	0.194114	CD4_24hr_vs_8hr	NS
MA1531.1.NR1D1	3885	0.23875	0.250403	0.73307	0.742406	0.020989	-0.193069	0.846905	MA1531.1	NR1D1	ENSG00000126368	Nuclear receptor	-0.361584	0.361724	CD4_24hr_vs_8hr	NS
MA0778.1.NFKB2	7659	-0.33257	-0.327346	0.956422	0.925727	-0.0254705	-0.440855	0.659318	MA0778.1	NFKB2	ENSG00000077150	Rel	0.605347	0.202059	CD4_24hr_vs_8hr	NS
MA0025.2.NFIL3	4876	0.717091	0.674241	0.576503	0.525135	-0.094219	-0.807517	0.419368	MA0025.2	NFIL3	ENSG00000165030	bZIP	-1.12025	0.0397669	CD4_24hr_vs_8hr	expression
MA0705.1.Lhx8	1109	0.856949	0.869996	0.913141	0.915642	0.0155483	-0.222086	0.824247	MA0705.1	LHX8	ENSG00000162624	Homeodomain	-0.993956	0.182276	CD4_24hr_vs_8hr	NS
MA0057.1.MZF1(var.2)	9705	1.3664	1.50903	1.09877	1.18909	0.232946	0.937382	0.348562	MA0057.1	MZF1	ENSG00000099326	C2H2 ZF	-0.196333	0.579902	CD4_24hr_vs_8hr	NS
MA0017.2.NR2F1	4719	0.0847437	0.114021	0.699054	0.711731	0.0419533	-0.0812579	0.935237	MA0017.2	NR2F1	ENSG00000175745	Nuclear receptor	-0.891309	0.213509	CD4_24hr_vs_8hr	NS
MA0631.1.Six3	2115	0.240682	0.205098	0.511553	0.454707	-0.0924295	-0.797973	0.424886	MA0631.1	SIX3	ENSG00000138083	Homeodomain	-1.87619	0.0395626	CD4_24hr_vs_8hr	expression
MA0619.1.LIN54	8102	0.577014	0.536027	0.613002	0.561573	-0.0924162	-0.797903	0.424927	MA0619.1	LIN54	ENSG00000189308	TCR/CxC	1.91766	2.49022e-05	CD4_24hr_vs_8hr	expression
MA0814.2.TFAP2C(var.2)	9876	0.147572	0.169951	1.29848	1.41377	0.137669	0.429233	0.667754	MA0814.2	TFAP2C	ENSG00000087510	AP-2	-1.05403	0.183216	CD4_24hr_vs_8hr	NS
MA0030.1.FOXF2	2555	0.431949	0.438144	0.590967	0.595742	0.0109712	-0.246498	0.805297	MA0030.1	FOXF2	ENSG00000137273	Forkhead	-1.36551	0.100505	CD4_24hr_vs_8hr	NS
MA1113.2.PBX2	5965	0.617113	0.573394	0.540093	0.495678	-0.0881342	-0.775065	0.438301	MA1113.2	PBX2	ENSG00000204304	Homeodomain	1.0285	0.0166377	CD4_24hr_vs_8hr	expression
MA1584.1.ZIC5	5838	0.467822	0.511186	1.52057	1.67579	0.198583	0.754107	0.450785	MA1584.1	ZIC5	ENSG00000139800	C2H2 ZF	-1.20846	0.133934	CD4_24hr_vs_8hr	NS
MA1474.1.CREB3L4	1817	0.446258	0.514022	1.59607	1.82516	0.296859	1.27825	0.20116	MA1474.1	CREB3L4	ENSG00000143578	bZIP	0.809734	0.114842	CD4_24hr_vs_8hr	NS
MA0639.1.DBP	671	0.389686	0.383594	0.534832	0.463177	-0.0777468	-0.719665	0.471731	MA0639.1	DBP	ENSG00000105516	bZIP	0.968511	0.0248135	CD4_24hr_vs_8hr	expression
MA0872.1.TFAP2A(var.3)	1172	0.538613	0.60535	1.10197	1.17507	0.139842	0.44082	0.659343	MA0872.1	TFAP2A	ENSG00000137203	AP-2	-1.03862	0.0974926	CD4_24hr_vs_8hr	NS
MA0101.1.REL	2514	-0.747602	-0.843408	0.999193	1.01742	-0.0775785	-0.718768	0.472284	MA0101.1	REL	ENSG00000162924	Rel	-1.54556	0.00523027	CD4_24hr_vs_8hr	expression
MA0130.1.ZNF354C	10840	0.664109	0.653314	0.622199	0.608335	-0.0246592	-0.436528	0.662453	MA0130.1	ZNF354C	ENSG00000177932	C2H2 ZF	0.147518	0.669942	CD4_24hr_vs_8hr	NS
MA0497.1.MEF2C	8834	0.534926	0.47254	0.540408	0.484581	-0.118214	-0.93549	0.349536	MA0497.1	MEF2C	ENSG00000081189	MADS box	-0.979178	0.150721	CD4_24hr_vs_8hr	NS
MA1594.1.ZNF382	2581	0.363062	0.378775	0.639464	0.623608	-0.000143021	-0.305774	0.759777	MA1594.1	ZNF382	ENSG00000161298	C2H2 ZF	0.233032	0.491335	CD4_24hr_vs_8hr	NS
MA0833.2.ATF4	5627	0.656873	0.651141	0.63579	0.616764	-0.0247576	-0.437053	0.662073	MA0833.2	ATF4	ENSG00000128272	bZIP	0.444968	0.347784	CD4_24hr_vs_8hr	NS
MA0525.2.TP63	2107	0.449664	0.401763	0.754889	0.772073	-0.0307176	-0.46884	0.639184	MA0525.2	TP63	ENSG00000073282	p53	-1.30875	0.0738715	CD4_24hr_vs_8hr	NS
MA1588.1.ZNF136	3569	0.333758	0.288589	0.587897	0.542714	-0.0903522	-0.786895	0.431344	MA1588.1	ZNF136	ENSG00000196646	C2H2 ZF	-0.185323	0.593512	CD4_24hr_vs_8hr	NS
MA0646.1.GCM1	2773	0.0874868	0.129841	0.89705	0.930462	0.0757667	0.0990817	0.921073	MA0646.1	GCM1	ENSG00000137270	GCM	-0.231341	0.731678	CD4_24hr_vs_8hr	NS
MA0109.1.HLTF	4402	0.389106	0.361303	0.557046	0.50732	-0.0775298	-0.718508	0.472444	MA0109.1	HLTF	ENSG00000071794	NA	1.14446	0.00451601	CD4_24hr_vs_8hr	expression
MA1420.1.IRF5	1667	0.341121	0.342941	0.88754	0.887863	0.00214228	-0.293586	0.769075	MA1420.1	IRF5	ENSG00000128604	IRF	0.666382	0.141467	CD4_24hr_vs_8hr	NS
MA0670.1.NFIA	4798	0.252769	0.269964	0.593638	0.579164	0.00272164	-0.290496	0.771437	MA0670.1	NFIA	ENSG00000162599	SMAD	-0.149772	0.690544	CD4_24hr_vs_8hr	NS
MA0019.1.Ddit3::Cebpa	3519	0.394635	0.353809	0.617475	0.586556	-0.0717464	-0.687662	0.491665	MA0019.1	DDIT3	ENSG00000175197	bZIP	-0.829938	0.0451433	CD4_24hr_vs_8hr	expression
MA0003.4.TFAP2A	9221	0.109743	0.138797	1.04459	1.10533	0.0897993	0.173923	0.861926	MA0003.4	TFAP2A	ENSG00000137203	AP-2	-1.03862	0.0974926	CD4_24hr_vs_8hr	NS
MA0523.1.TCF7L2	9068	0.364169	0.330384	0.676155	0.638367	-0.0715729	-0.686737	0.492248	MA0523.1	TCF7L2	ENSG00000148737	Sox	-1.07457	0.0148818	CD4_24hr_vs_8hr	expression
MA1552.1.RARB(var.3)	265	0.386821	0.352478	1.01856	1.09943	0.0465282	-0.0568586	0.954658	MA1552.1	RARB	ENSG00000077092	Nuclear receptor	-1.0358	0.179336	CD4_24hr_vs_8hr	NS
MA0508.3.PRDM1	17559	0.682635	0.652237	0.75974	0.721608	-0.0685299	-0.670508	0.502534	MA0508.3	PRDM1	ENSG00000057657	C2H2 ZF	-1.78262	0.000454765	CD4_24hr_vs_8hr	expression
MA1126.1.FOS::JUN(var.2)	3533	0.754268	0.817397	1.1262	1.23188	0.16881	0.595316	0.551632	MA1126.1	JUN	ENSG00000177606	bZIP	-0.629717	0.157553	CD4_24hr_vs_8hr	NS
MA1602.1.ZSCAN29	1854	-0.0660336	-0.070163	0.794837	0.815773	0.0168068	-0.215374	0.829476	MA1602.1	ZSCAN29	ENSG00000140265	C2H2 ZF,MADF	0.369135	0.313267	CD4_24hr_vs_8hr	NS
MA1547.1.PITX2	2015	0.412629	0.348379	0.354483	0.314351	-0.104382	-0.86172	0.388841	MA1547.1	PITX2	ENSG00000164093	Homeodomain	-0.950779	0.162742	CD4_24hr_vs_8hr	NS
MA1651.1.ZFP42	3367	0.485493	0.528048	0.992699	1.08197	0.131827	0.398072	0.690577	MA1651.1	ZFP42	ENSG00000179059	C2H2 ZF	-1.24227	0.130214	CD4_24hr_vs_8hr	NS
MA0751.1.ZIC4	5943	0.424365	0.451495	1.39283	1.52057	0.154866	0.520948	0.602403	MA0751.1	ZIC4	ENSG00000174963	C2H2 ZF	-1.07612	0.115382	CD4_24hr_vs_8hr	NS
MA0072.1.RORA(var.2)	3739	0.321024	0.300456	0.577075	0.530862	-0.0667809	-0.66118	0.508497	MA0072.1	RORA	ENSG00000069667	Nuclear receptor	-2.10825	1.99532e-05	CD4_24hr_vs_8hr	expression
MA1472.1.BHLHA15(var.2)	10634	-0.813308	-0.798329	0.741105	0.751527	0.0254009	-0.169539	0.865373	MA1472.1	BHLHA15	ENSG00000180535	bHLH	-0.38202	0.584892	CD4_24hr_vs_8hr	NS
MA0779.1.PAX1	1434	0.600861	0.666404	1.01639	1.09902	0.148176	0.485268	0.627486	MA0779.1	PAX1	ENSG00000125813	Paired box	-1.40399	0.0768115	CD4_24hr_vs_8hr	NS
MA0155.1.INSM1	8041	0.491536	0.574471	1.18872	1.317	0.211215	0.821482	0.411372	MA0155.1	INSM1	ENSG00000173404	C2H2 ZF	-0.526832	0.441279	CD4_24hr_vs_8hr	NS
MA0897.1.Hmx2	562	0.464859	0.485625	0.651012	0.630575	0.000329018	-0.303256	0.761694	MA0897.1	HMX2	ENSG00000188816	Homeodomain	-0.468132	0.482882	CD4_24hr_vs_8hr	NS
MA1587.1.ZNF135	11215	0.201099	0.233949	0.790497	0.823786	0.0661392	0.0477345	0.961928	MA1587.1	ZNF135	ENSG00000176293	C2H2 ZF	-0.763242	0.080263	CD4_24hr_vs_8hr	NS
MA0633.1.Twist2	3406	0.483865	0.456107	0.506713	0.487931	-0.0465383	-0.553218	0.580114	MA0633.1	TWIST2	ENSG00000233608	bHLH	-1.32975	0.129463	CD4_24hr_vs_8hr	NS
MA0792.1.POU5F1B	7858	0.766981	0.739366	0.665416	0.620099	-0.0729324	-0.693988	0.48769	MA0792.1	POU5F1B	ENSG00000212993	Homeodomain	-0.962909	0.16457	CD4_24hr_vs_8hr	NS
MA0787.1.POU3F2	8204	0.698196	0.642888	0.622933	0.558256	-0.119986	-0.94494	0.344689	MA0787.1	POU3F2	ENSG00000184486	Homeodomain,POU	-0.784934	0.264626	CD4_24hr_vs_8hr	NS
MA0711.1.OTX1	1816	0.278553	0.225688	0.654848	0.667675	-0.040038	-0.51855	0.604075	MA0711.1	OTX1	ENSG00000115507	Homeodomain	-1.07017	0.138451	CD4_24hr_vs_8hr	NS
MA1514.1.KLF17	11049	1.38049	1.59095	1.258	1.42413	0.376596	1.70352	0.0884709	MA1514.1	KLF17	ENSG00000171872	C2H2 ZF	-1.13416	0.150448	CD4_24hr_vs_8hr	NS
MA0108.2.TBP	2804	0.291173	0.269972	0.602692	0.573396	-0.0504969	-0.574331	0.565744	MA0108.2	TBP	ENSG00000112592	TBP	0.616986	0.153283	CD4_24hr_vs_8hr	NS
MA0836.2.CEBPD	4394	0.497562	0.473069	0.592635	0.549543	-0.0675856	-0.665471	0.505749	MA0836.2	CEBPD	ENSG00000221869	bZIP	-0.909158	0.222542	CD4_24hr_vs_8hr	NS
MA0144.2.STAT3	7854	-0.113933	-0.120501	0.735919	0.728236	-0.0142505	-0.381015	0.703192	MA0144.2	STAT3	ENSG00000168610	STAT	0.681064	0.187085	CD4_24hr_vs_8hr	NS
MA1139.1.FOSL2::JUNB(var.2)	547	0.502552	0.441424	0.738484	0.737199	-0.0624128	-0.637883	0.52355	MA1139.1	FOSL2	ENSG00000075426	bZIP	-1.99373	0.00019124	CD4_24hr_vs_8hr	expression
MA0041.1.Foxd3	12192	0.592072	0.569445	0.512729	0.484762	-0.0505933	-0.574845	0.565396	MA0041.1	FOXD3	ENSG00000187140	Forkhead	-1.1268	0.152457	CD4_24hr_vs_8hr	NS
MA0640.2.ELF3	17229	0.673568	0.693093	0.951042	0.985209	0.0536926	-0.0186476	0.985122	MA0640.2	ELF3	ENSG00000163435	Ets	-0.812407	0.206994	CD4_24hr_vs_8hr	NS
MA0800.1.EOMES	4700	0.259437	0.248967	0.651096	0.60978	-0.0517859	-0.581205	0.561102	MA0800.1	EOMES	ENSG00000163508	T-box	-2.38281	9.89639e-06	CD4_24hr_vs_8hr	expression
MA0595.1.SREBF1	6972	0.763926	0.835056	0.771295	0.808676	0.108511	0.273718	0.784301	MA0595.1	SREBF1	ENSG00000072310	bHLH	0.870525	0.0891476	CD4_24hr_vs_8hr	NS
MA1489.1.FOXN3	16028	0.902093	0.874338	0.618492	0.594495	-0.0517516	-0.581023	0.561225	MA1489.1	FOXN3	ENSG00000053254	Forkhead	1.04673	0.0363009	CD4_24hr_vs_8hr	expression
MA1506.1.HOXD10	275	0.498229	0.500208	0.815594	0.815076	0.00146016	-0.297224	0.766296	MA1506.1	HOXD10	ENSG00000128710	Homeodomain	-0.79889	0.315036	CD4_24hr_vs_8hr	NS
MA0463.2.BCL6	2587	0.0609504	0.0356851	0.718902	0.693165	-0.0510026	-0.577028	0.563921	MA0463.2	BCL6	ENSG00000113916	C2H2 ZF	-1.26544	0.00175866	CD4_24hr_vs_8hr	expression
MA0494.1.Nr1h3::Rxra	3361	0.201051	0.187742	0.599584	0.569772	-0.0431209	-0.534991	0.592656	MA0494.1	NR1H3	ENSG00000025434	Nuclear receptor	0.845345	0.0312104	CD4_24hr_vs_8hr	expression
MA0496.3.MAFK	11282	0.227972	0.230646	0.769609	0.836617	0.0696816	0.0666274	0.946878	MA0496.3	MAFK	ENSG00000198517	bZIP	-0.452135	0.259968	CD4_24hr_vs_8hr	NS
MA1592.1.ZNF274	3913	0.161964	0.173951	0.640885	0.627848	-0.00105059	-0.310614	0.756094	MA1592.1	ZNF274	ENSG00000171606	C2H2 ZF	-0.299669	0.423085	CD4_24hr_vs_8hr	NS
MA0601.1.Arid3b	5571	0.529537	0.450025	0.487817	0.417903	-0.149426	-1.10196	0.27048	MA0601.1	ARID3B	ENSG00000179361	ARID/BRIGHT	0.661473	0.0933899	CD4_24hr_vs_8hr	NS
MA0070.1.PBX1	4186	0.797479	0.778253	0.692373	0.673418	-0.0381817	-0.508649	0.610998	MA0070.1	PBX1	ENSG00000185630	Homeodomain	-1.25497	0.0185291	CD4_24hr_vs_8hr	expression
MA0739.1.Hic1	5496	0.66103	0.682732	0.689128	0.697986	0.0305597	-0.142025	0.88706	MA0739.1	HIC1	ENSG00000177374	C2H2 ZF	1.09293	0.0688313	CD4_24hr_vs_8hr	NS
MA0039.4.KLF4	31603	1.34163	1.5346	1.70431	1.93273	0.421381	1.94238	0.0520916	MA0039.4	KLF4	ENSG00000136826	C2H2 ZF	-1.05523	0.168067	CD4_24hr_vs_8hr	NS
MA1533.1.NR1I2	2052	0.190358	0.217507	0.867764	0.923699	0.0830848	0.138112	0.890152	MA1533.1	NR1I2	ENSG00000144852	Nuclear receptor	0.884426	0.0972094	CD4_24hr_vs_8hr	NS
MA1580.1.ZBTB32	5373	-0.185866	-0.166752	0.521187	0.467462	-0.0346116	-0.489608	0.624411	MA1580.1	ZBTB32	ENSG00000011590	C2H2 ZF	2.40674	3.11565e-06	CD4_24hr_vs_8hr	expression
MA0766.2.GATA5	4123	0.296583	0.277047	0.615414	0.588984	-0.0459667	-0.550169	0.582203	MA0766.2	GATA5	ENSG00000130700	GATA	-1.22037	0.126142	CD4_24hr_vs_8hr	NS
MA0137.3.STAT1	2620	0.14999	0.134818	0.676923	0.639559	-0.0525371	-0.585212	0.558405	MA0137.3	STAT1	ENSG00000115415	STAT	0.389597	0.394764	CD4_24hr_vs_8hr	NS
MA0762.1.ETV2	6202	0.41669	0.410614	1.15882	1.2385	0.0736107	0.0875832	0.930208	MA0762.1	ETV2	ENSG00000105672	Ets	-0.212152	0.742615	CD4_24hr_vs_8hr	NS
MA0910.2.HOXD8	2421	0.658051	0.588279	0.68198	0.646104	-0.105648	-0.868471	0.385136	MA0910.2	HOXD8	ENSG00000175879	Homeodomain	-1.19898	0.138617	CD4_24hr_vs_8hr	NS
MA0104.4.MYCN	2136	0.568534	0.657654	1.27618	1.47062	0.283557	1.20731	0.227313	MA0104.4	MYCN	ENSG00000134323	bHLH	-1.23476	0.135916	CD4_24hr_vs_8hr	NS
MA0691.1.TFAP4	4062	-0.0728024	-0.0684121	0.679964	0.687181	0.0116076	-0.243104	0.807925	MA0691.1	TFAP4	ENSG00000090447	bHLH	0.634432	0.145702	CD4_24hr_vs_8hr	NS
MA0809.2.TEAD4	4955	0.188342	0.189109	0.538753	0.509106	-0.0288792	-0.459035	0.646209	MA0809.2	TEAD4	ENSG00000197905	TEA	1.41781	0.00845596	CD4_24hr_vs_8hr	expression
MA0693.2.VDR	5156	-0.296283	-0.290969	0.596712	0.567729	-0.023669	-0.431247	0.666289	MA0693.2	VDR	ENSG00000111424	Nuclear receptor	2.25622	3.66837e-06	CD4_24hr_vs_8hr	expression
MA0100.3.MYB	5303	0.102758	0.107477	0.685551	0.666779	-0.0140521	-0.379956	0.703978	MA0100.3	MYB	ENSG00000118513	Myb/SANT	-0.505963	0.238232	CD4_24hr_vs_8hr	NS
MA1491.1.GLI3	5800	0.828765	0.949036	1.07494	1.18964	0.234969	0.94817	0.343043	MA1491.1	GLI3	ENSG00000106571	C2H2 ZF	-0.961846	0.123274	CD4_24hr_vs_8hr	NS
MA0113.3.NR3C1	2270	0.114708	0.0969089	0.652323	0.635218	-0.0349044	-0.49117	0.623306	MA0113.3	NR3C1	ENSG00000113580	Nuclear receptor	-0.638278	0.164404	CD4_24hr_vs_8hr	NS
MA0907.1.HOXC13	2085	0.308484	0.279678	0.586434	0.53382	-0.0814208	-0.73926	0.459749	MA0907.1	HOXC13	ENSG00000123364	Homeodomain	-1.10476	0.176964	CD4_24hr_vs_8hr	NS
MA1504.1.HOXC4	3150	0.779056	0.71871	0.567976	0.518595	-0.109727	-0.890227	0.373344	MA1504.1	HOXC4	ENSG00000198353	Homeodomain	-1.21563	0.272351	CD4_24hr_vs_8hr	NS
MA0157.2.FOXO3	5210	0.655115	0.67483	0.618631	0.633545	0.0346292	-0.12032	0.90423	MA0157.2	FOXO3	ENSG00000118689	Forkhead	-0.684834	0.0783617	CD4_24hr_vs_8hr	NS
MA0116.1.Znf423	4940	0.65066	0.719939	0.964264	1.03715	0.142165	0.45321	0.650398	MA0116.1	ZNF423	ENSG00000102935	C2H2 ZF	-0.894854	0.196304	CD4_24hr_vs_8hr	NS
MA0147.3.MYC	4225	0.695293	0.832196	1.35749	1.59535	0.374764	1.69375	0.090313	MA0147.3	MYC	ENSG00000136997	bHLH	-0.302665	0.547135	CD4_24hr_vs_8hr	NS
MA1532.1.NR1D2	1147	0.337653	0.324414	0.665221	0.656178	-0.022282	-0.42385	0.671675	MA1532.1	NR1D2	ENSG00000174738	Nuclear receptor	-1.38521	0.000676837	CD4_24hr_vs_8hr	expression
MA0106.3.TP53	1568	0.421533	0.395442	0.674464	0.680347	-0.020208	-0.412788	0.679762	MA0106.3	TP53	ENSG00000141510	p53	1.26547	0.00701591	CD4_24hr_vs_8hr	expression
MA1643.1.NFIB	5161	0.267431	0.269314	0.717572	0.735241	0.0195521	-0.200732	0.840908	MA1643.1	NFIB	ENSG00000147862	SMAD	-0.803945	0.195982	CD4_24hr_vs_8hr	NS
MA0652.1.IRF8	2463	-0.0232556	-0.012159	0.897985	0.804455	-0.0824336	-0.744662	0.456476	MA0652.1	IRF8	ENSG00000140968	IRF	0.138421	0.805588	CD4_24hr_vs_8hr	NS
MA0620.3.MITF	4552	0.728516	0.771212	1.01143	1.09672	0.12798	0.377558	0.705759	MA0620.3	MITF	ENSG00000187098	bHLH	-1.10929	0.091466	CD4_24hr_vs_8hr	NS
MA1637.1.EBF3	790	0.256753	0.28666	1.04064	1.12335	0.112624	0.295659	0.767491	MA1637.1	EBF3	ENSG00000108001	EBF1	-1.11142	0.173455	CD4_24hr_vs_8hr	NS
MA0893.2.GSX2	934	1.18398	1.1459	0.772564	0.74018	-0.0704721	-0.680866	0.495956	MA0893.2	GSX2	ENSG00000180613	Homeodomain	-0.676351	0.399473	CD4_24hr_vs_8hr	NS
MA0683.1.POU4F2	1587	0.70898	0.660321	0.582994	0.512424	-0.119229	-0.940907	0.346752	MA0683.1	POU4F2	ENSG00000151615	Homeodomain,POU	-1.12298	0.174455	CD4_24hr_vs_8hr	NS
MA0107.1.RELA	7083	-0.688335	-0.678394	0.894591	0.867344	-0.0173059	-0.39731	0.691139	MA0107.1	RELA	ENSG00000173039	Rel	0.376306	0.387086	CD4_24hr_vs_8hr	NS
MA0087.1.Sox5	7070	0.342871	0.312797	0.531868	0.481769	-0.0801729	-0.732604	0.4638	MA0087.1	SOX5	ENSG00000134532	Sox	-1.19446	0.126656	CD4_24hr_vs_8hr	NS
MA1645.1.NKX2-2	6286	0.426937	0.456489	0.663668	0.670489	0.0363727	-0.111021	0.911599	MA1645.1	NKX2-2	ENSG00000125820	Homeodomain	-1.39792	0.0951624	CD4_24hr_vs_8hr	NS
MA0627.2.POU2F3	7939	0.746571	0.689976	0.625494	0.566314	-0.115775	-0.922481	0.356278	MA0627.2	POU2F3	ENSG00000137709	Homeodomain,POU	-0.870223	0.18329	CD4_24hr_vs_8hr	NS
MA1539.1.NR2F6(var.3)	3163	-0.0246106	-0.0328271	0.70799	0.698947	-0.0172602	-0.397066	0.691319	MA1539.1	NR2F6	ENSG00000160113	Nuclear receptor	1.07568	0.00908173	CD4_24hr_vs_8hr	expression
MA0163.1.PLAG1	10782	0.569172	0.644165	1.25933	1.39737	0.21303	0.831161	0.405883	MA0163.1	PLAG1	ENSG00000181690	C2H2 ZF	0.377237	0.30606	CD4_24hr_vs_8hr	NS
MA0482.2.GATA4	6082	0.524239	0.493746	0.585384	0.541948	-0.0739294	-0.699305	0.484361	MA0482.2	GATA4	ENSG00000136574	GATA	-1.11413	0.133108	CD4_24hr_vs_8hr	NS
MA1142.1.FOSL1::JUND	2881	0.829073	0.837521	0.87335	0.885861	0.020959	-0.193229	0.84678	MA1142.1	FOSL1	ENSG00000175592	bZIP	-0.917026	0.0959948	CD4_24hr_vs_8hr	NS
MA0859.1.Rarg	3905	0.219593	0.229589	0.589218	0.56211	-0.0171123	-0.396277	0.6919	MA0859.1	RARG	ENSG00000172819	Nuclear receptor	1.49475	0.000373908	CD4_24hr_vs_8hr	expression
MA0847.2.FOXD2	7038	0.578642	0.561646	0.51262	0.496129	-0.0334857	-0.483604	0.628667	MA0847.2	FOXD2	ENSG00000186564	Forkhead	-0.996083	0.13572	CD4_24hr_vs_8hr	NS
MA1509.1.IRF6	1208	0.316244	0.335482	1.18026	1.26749	0.106472	0.262846	0.79267	MA1509.1	IRF6	ENSG00000117595	IRF	-0.172639	0.754123	CD4_24hr_vs_8hr	NS
MA0728.1.Nr2f6(var.2)	3890	0.275455	0.286946	0.612833	0.584313	-0.0170293	-0.395835	0.692227	MA0728.1	NR2F6	ENSG00000160113	Nuclear receptor	1.07568	0.00908173	CD4_24hr_vs_8hr	expression
MA0839.1.CREB3L1	2180	0.563772	0.621932	1.29145	1.45012	0.21683	0.851428	0.394531	MA0839.1	CREB3L1	ENSG00000157613	bZIP	-0.483723	0.409316	CD4_24hr_vs_8hr	NS
MA0764.2.ETV4	20201	0.750208	0.781869	0.939314	0.973481	0.0658265	0.0460668	0.963257	MA0764.2	ETV4	ENSG00000175832	Ets	0.172011	0.763432	CD4_24hr_vs_8hr	NS
MA0684.2.RUNX3	7833	0.311656	0.315893	0.712633	0.692034	-0.0163617	-0.392274	0.694856	MA0684.2	RUNX3	ENSG00000020633	Runt	0.99734	0.0498916	CD4_24hr_vs_8hr	expression
MA0014.3.PAX5	2669	0.571261	0.683177	1.78279	1.99855	0.327671	1.44259	0.149137	MA0014.3	PAX5	ENSG00000196092	Paired box	-0.710764	0.194273	CD4_24hr_vs_8hr	NS
MA0879.1.Dlx1	821	0.384542	0.305679	0.513746	0.465574	-0.127036	-0.982543	0.325832	MA0879.1	DLX1	ENSG00000144355	Homeodomain	-0.96752	0.221624	CD4_24hr_vs_8hr	NS
MA1575.1.THRB(var.2)	3098	0.4515	0.48661	0.851452	0.913904	0.0975623	0.215326	0.829513	MA1575.1	THRB	ENSG00000151090	Nuclear receptor	-1.28437	0.0797386	CD4_24hr_vs_8hr	NS
MA1546.1.PAX3(var.2)	959	0.378249	0.436921	1.01096	1.06072	0.10844	0.273343	0.78459	MA1546.1	PAX3	ENSG00000135903	Homeodomain,Paired box	-1.08318	0.145055	CD4_24hr_vs_8hr	NS
MA0650.2.HOXA13	1704	0.849152	0.88529	0.772437	0.775808	0.0395092	-0.0942935	0.924876	MA0650.2	HOXA13	ENSG00000106031	Homeodomain	-1.26935	0.123894	CD4_24hr_vs_8hr	NS
MA0059.1.MAX::MYC	3937	0.404711	0.439473	1.02553	1.14596	0.155194	0.522696	0.601186	MA0059.1	MAX	ENSG00000125952	bHLH	0.535607	0.221626	CD4_24hr_vs_8hr	NS
MA0059.1.MAX::MYC	3937	0.404711	0.439473	1.02553	1.14596	0.155194	0.522696	0.601186	MA0059.1	MYC	ENSG00000136997	bHLH	-0.302665	0.547135	CD4_24hr_vs_8hr	NS
MA0628.1.POU6F1	1716	0.570494	0.505121	0.515104	0.460933	-0.119544	-0.942587	0.345892	MA0628.1	POU6F1	ENSG00000184271	Homeodomain	-0.194579	0.589907	CD4_24hr_vs_8hr	NS
MA0038.2.GFI1	4455	-0.348102	-0.353715	0.762093	0.762748	-0.00495899	-0.331459	0.740297	MA0038.2	GFI1	ENSG00000162676	C2H2 ZF	-0.856809	0.12733	CD4_24hr_vs_8hr	NS
MA0594.2.HOXA9	149	0.216099	0.169786	1.40515	1.58383	0.132366	0.400948	0.688458	MA0594.2	HOXA9	ENSG00000078399	Homeodomain	-1.54879	0.0908343	CD4_24hr_vs_8hr	NS
MA0776.1.MYBL1	880	-0.512415	-0.584625	0.749757	0.805528	-0.01644	-0.392692	0.694547	MA0776.1	MYBL1	ENSG00000185697	Myb/SANT	0.470074	0.299928	CD4_24hr_vs_8hr	NS
MA1577.1.TLX2	467	0.836283	0.802233	0.651424	0.621266	-0.0642073	-0.647454	0.517338	MA1577.1	TLX2	ENSG00000115297	Homeodomain	-0.674763	0.289819	CD4_24hr_vs_8hr	NS
MA0160.1.NR4A2	1957	0.0792613	0.0687662	0.61226	0.608335	-0.0144205	-0.381921	0.70252	MA0160.1	NR4A2	ENSG00000153234	Nuclear receptor	-0.967207	0.0499605	CD4_24hr_vs_8hr	expression
MA0796.1.TGIF1	6043	-0.0869762	-0.066338	0.605718	0.573269	-0.0118101	-0.367999	0.712874	MA0796.1	TGIF1	ENSG00000177426	Homeodomain	-2.40096	2.97332e-06	CD4_24hr_vs_8hr	expression
MA1615.1.Plagl1	9579	0.338347	0.383655	1.17833	1.2642	0.131178	0.394614	0.693127	MA1615.1	PLAGL1	ENSG00000118495	C2H2 ZF	0.757751	0.0586927	CD4_24hr_vs_8hr	NS
MA1112.2.NR4A1	6937	0.214611	0.219232	0.673949	0.683695	0.0143672	-0.228385	0.819347	MA1112.2	NR4A1	ENSG00000123358	Nuclear receptor	-0.936654	0.0626838	CD4_24hr_vs_8hr	NS
MA0757.1.ONECUT3	1457	0.663844	0.601751	0.549627	0.493386	-0.118334	-0.93613	0.349206	MA0757.1	ONECUT3	ENSG00000205922	CUT,Homeodomain	-1.35896	0.0649988	CD4_24hr_vs_8hr	NS
MA0467.1.Crx	4739	0.349204	0.317526	0.584986	0.562588	-0.0540765	-0.593422	0.552899	MA0467.1	CRX	ENSG00000105392	Homeodomain	-1.16594	0.0999863	CD4_24hr_vs_8hr	NS
MA0517.1.STAT1::STAT2	19088	0.670436	0.635715	0.835	0.777047	-0.0926734	-0.799274	0.424131	MA0517.1	STAT1	ENSG00000115415	STAT	0.389597	0.394764	CD4_24hr_vs_8hr	NS
MA0517.1.STAT1::STAT2	19088	0.670436	0.635715	0.835	0.777047	-0.0926734	-0.799274	0.424131	MA0517.1	STAT2	ENSG00000170581	STAT	0.0263559	0.950561	CD4_24hr_vs_8hr	NS
MA0047.3.FOXA2	477	0.366986	0.319918	0.451357	0.422745	-0.0756806	-0.708645	0.478545	MA0047.3	FOXA2	ENSG00000125798	Forkhead	-1.12267	0.154069	CD4_24hr_vs_8hr	NS
MA1503.1.HOXB9	2172	0.44617	0.418377	0.632072	0.615949	-0.0439161	-0.539233	0.589726	MA1503.1	HOXB9	ENSG00000170689	Homeodomain	-0.639472	0.274623	CD4_24hr_vs_8hr	NS
MA1109.1.NEUROD1	4309	0.434389	0.447	0.740287	0.739465	0.0117892	-0.242135	0.808676	MA1109.1	NEUROD1	ENSG00000162992	bHLH	-0.592556	0.430464	CD4_24hr_vs_8hr	NS
MA0883.1.Dmbx1	2030	0.405343	0.38463	0.502824	0.462366	-0.0611716	-0.631263	0.527869	MA0883.1	DMBX1	ENSG00000197587	Homeodomain	-0.915565	0.2553	CD4_24hr_vs_8hr	NS
MA0071.1.RORA	4371	-0.165406	-0.148746	0.576809	0.554556	-0.00559357	-0.334844	0.737743	MA0071.1	RORA	ENSG00000069667	Nuclear receptor	-2.10825	1.99532e-05	CD4_24hr_vs_8hr	expression
MA0124.2.Nkx3-1	4656	0.0735482	0.11744	0.631058	0.616677	0.0295109	-0.147618	0.882644	MA0124.2	NKX3-1	ENSG00000167034	Homeodomain	0.07773	0.882774	CD4_24hr_vs_8hr	NS
MA0674.1.NKX6-1	1684	0.709796	0.620266	0.550776	0.476551	-0.163756	-1.17838	0.238644	MA0674.1	NKX6-1	ENSG00000163623	Homeodomain	-0.796283	0.277244	CD4_24hr_vs_8hr	NS
MA0729.1.RARA	3733	0.322374	0.322995	0.56689	0.530749	-0.0355185	-0.494445	0.620992	MA0729.1	RARA	ENSG00000131759	Nuclear receptor	0.214968	0.598117	CD4_24hr_vs_8hr	NS
MA0143.4.SOX2	5409	0.276583	0.249264	0.546744	0.502126	-0.0719378	-0.688683	0.491023	MA0143.4	SOX2	ENSG00000181449	Sox	-1.28274	0.141124	CD4_24hr_vs_8hr	NS
MA0600.2.RFX2	3613	0.543628	0.556917	1.1488	1.20901	0.0734987	0.0869859	0.930683	MA0600.2	RFX2	ENSG00000087903	RFX	0.772536	0.0568883	CD4_24hr_vs_8hr	NS
MA0837.1.CEBPE	2280	0.767384	0.817444	0.87135	0.890848	0.0695579	0.065968	0.947403	MA0837.1	CEBPE	ENSG00000092067	bZIP	-0.320688	0.628429	CD4_24hr_vs_8hr	NS
MA0730.1.RARA(var.2)	1345	0.363095	0.340093	0.795079	0.794044	-0.0240372	-0.433211	0.664862	MA0730.1	RARA	ENSG00000131759	Nuclear receptor	0.214968	0.598117	CD4_24hr_vs_8hr	NS
MA0048.2.NHLH1	5989	-0.732184	-0.742875	0.979416	1.03738	0.0472735	-0.0528836	0.957825	MA0048.2	NHLH1	ENSG00000171786	bHLH	0.0849935	0.891948	CD4_24hr_vs_8hr	NS
MA0098.3.ETS1	739	0.282532	0.291487	1.36771	1.52957	0.170814	0.606005	0.544512	MA0098.3	ETS1	ENSG00000134954	Ets	0.920473	0.0850842	CD4_24hr_vs_8hr	NS
MA0763.1.ETV3	607	-0.321101	-0.285755	0.804014	0.843949	0.0752802	0.0964871	0.923134	MA0763.1	ETV3	ENSG00000117036	Ets	-0.143933	0.715316	CD4_24hr_vs_8hr	NS
MA0135.1.Lhx3	6004	0.582802	0.503401	0.482257	0.416446	-0.145211	-1.07948	0.280374	MA0135.1	LHX3	ENSG00000107187	Homeodomain	-0.921508	0.237485	CD4_24hr_vs_8hr	NS
MA0607.1.Bhlha15	3725	0.623136	0.557188	0.487765	0.433513	-0.1202	-0.946085	0.344105	MA0607.1	BHLHA15	ENSG00000180535	bHLH	-0.38202	0.584892	CD4_24hr_vs_8hr	NS
MA1566.1.TBX3	3772	0.55283	0.593866	0.876119	0.903129	0.0680458	0.0579033	0.953826	MA1566.1	TBX3	ENSG00000135111	T-box	-1.39817	0.0691924	CD4_24hr_vs_8hr	NS
MA0091.1.TAL1::TCF3	5951	0.22301	0.20248	0.614231	0.57744	-0.0573214	-0.610729	0.541379	MA0091.1	TAL1	ENSG00000162367	bHLH	-0.947177	0.125264	CD4_24hr_vs_8hr	NS
MA0091.1.TAL1::TCF3	5951	0.22301	0.20248	0.614231	0.57744	-0.0573214	-0.610729	0.541379	MA0091.1	TCF3	ENSG00000071564	bHLH	0.931474	0.0659962	CD4_24hr_vs_8hr	NS
MA0074.1.RXRA::VDR	1885	0.134741	0.114387	0.719816	0.735572	-0.00459863	-0.329538	0.741749	MA0074.1	VDR	ENSG00000111424	Nuclear receptor	2.25622	3.66837e-06	CD4_24hr_vs_8hr	expression
MA0673.1.NKX2-8	5789	0.382839	0.374507	0.661609	0.642297	-0.027644	-0.452448	0.650947	MA0673.1	NKX2-8	ENSG00000136327	Homeodomain	-1.31373	0.130539	CD4_24hr_vs_8hr	NS
MA0486.2.HSF1	582	0.137302	0.145229	0.614652	0.579451	-0.027274	-0.450474	0.652369	MA0486.2	HSF1	ENSG00000185122	HSF	0.79884	0.0971392	CD4_24hr_vs_8hr	NS
MA1652.1.ZKSCAN5	16917	1.15834	1.24535	1.04381	1.10401	0.14721	0.480115	0.631145	MA1652.1	ZKSCAN5	ENSG00000196652	C2H2 ZF	0.397403	0.263844	CD4_24hr_vs_8hr	NS
MA1479.1.DMRTC2	4775	0.364419	0.33073	0.546143	0.476009	-0.103823	-0.858742	0.390483	MA1479.1	DMRTC2	ENSG00000142025	DM	-0.802729	0.216921	CD4_24hr_vs_8hr	NS
MA1601.1.ZNF75D	10348	0.655186	0.715422	0.788077	0.835904	0.108063	0.271329	0.786138	MA1601.1	ZNF75D	ENSG00000186376	C2H2 ZF	0.133943	0.693946	CD4_24hr_vs_8hr	NS
MA0597.1.THAP1	7812	0.334638	0.396252	0.981979	1.03512	0.114758	0.307039	0.758814	MA0597.1	THAP1	ENSG00000131931	THAP finger	0.815873	0.0559496	CD4_24hr_vs_8hr	NS
MA0861.1.TP73	1326	0.275606	0.268726	0.658395	0.65671	-0.00856462	-0.35069	0.725821	MA0861.1	TP73	ENSG00000078900	p53	-0.690733	0.235897	CD4_24hr_vs_8hr	NS
MA0906.1.HOXC12	2061	0.435613	0.413354	0.623352	0.600621	-0.0449899	-0.54496	0.585781	MA0906.1	HOXC12	ENSG00000123407	Homeodomain	-1.20644	0.144301	CD4_24hr_vs_8hr	NS
MA0643.1.Esrrg	4501	0.0355105	0.0298667	0.618032	0.621498	-0.00217797	-0.316627	0.751527	MA0643.1	ESRRG	ENSG00000196482	Nuclear receptor	-0.967331	0.16	CD4_24hr_vs_8hr	NS
MA0664.1.MLXIPL	293	0.085339	0.0531078	0.992331	1.08913	0.06457	0.0393656	0.968599	MA0664.1	MLXIPL	ENSG00000009950	bHLH	-0.991792	0.150679	CD4_24hr_vs_8hr	NS
MA1494.1.HNF4A(var.2)	2334	0.334341	0.360933	0.716316	0.718215	0.0284909	-0.153058	0.878352	MA1494.1	HNF4A	ENSG00000101076	Nuclear receptor	-1.125	0.139622	CD4_24hr_vs_8hr	NS
MA1638.1.HAND2	6213	0.286338	0.295787	0.652115	0.629779	-0.0128862	-0.373738	0.708599	MA1638.1	HAND2	ENSG00000164107	bHLH	-1.23646	0.129644	CD4_24hr_vs_8hr	NS
MA1148.1.PPARA::RXRA	4171	0.449471	0.456435	0.702256	0.691441	-0.00385183	-0.325555	0.744761	MA1148.1	PPARA	ENSG00000186951	Nuclear receptor	1.3064	0.000966333	CD4_24hr_vs_8hr	expression
MA1549.1.POU6F1(var.2)	4533	0.668706	0.618306	0.607359	0.543127	-0.114631	-0.916383	0.359466	MA1549.1	POU6F1	ENSG00000184271	Homeodomain	-0.194579	0.589907	CD4_24hr_vs_8hr	NS
MA0798.2.RFX3	1228	0.294933	0.306395	0.913566	0.939145	0.0370416	-0.107454	0.914429	MA0798.2	RFX3	ENSG00000080298	RFX	0.384264	0.281562	CD4_24hr_vs_8hr	NS
MA0820.1.FIGLA	5879	-0.0489198	-0.00936508	0.646158	0.644435	0.037832	-0.103239	0.917774	MA0820.1	FIGLA	ENSG00000183733	bHLH	-1.04562	0.255654	CD4_24hr_vs_8hr	NS
MA0742.1.Klf12	7864	1.21666	1.3773	1.93774	2.17858	0.401482	1.83625	0.066321	MA0742.1	KLF12	ENSG00000118922	C2H2 ZF	0.0562244	0.90524	CD4_24hr_vs_8hr	NS
MA0857.1.Rarb	4300	0.234531	0.25744	0.568705	0.540423	-0.00537312	-0.333668	0.73863	MA0857.1	RARB	ENSG00000077092	Nuclear receptor	-1.0358	0.179336	CD4_24hr_vs_8hr	NS
MA0801.1.MGA	3092	0.00281113	0.0368894	0.721016	0.698454	0.0115163	-0.24359	0.807548	MA0801.1	MGA	ENSG00000174197	bHLH,T-box	-0.554717	0.239613	CD4_24hr_vs_8hr	NS
MA0830.2.TCF4	9924	0.301061	0.354149	0.889606	0.94303	0.106512	0.26306	0.792504	MA0830.2	TCF4	ENSG00000196628	bHLH	-0.663195	0.145651	CD4_24hr_vs_8hr	NS
MA1649.1.ZBTB12	4549	-0.504767	-0.496932	0.661776	0.651714	-0.00222728	-0.31689	0.751327	MA1649.1	ZBTB12	ENSG00000204366	C2H2 ZF	1.22028	0.00542723	CD4_24hr_vs_8hr	expression
MA1567.1.TBX6	391	-0.168788	-0.203627	0.805956	0.774655	-0.0661394	-0.657758	0.510693	MA1567.1	TBX6	ENSG00000149922	T-box	0.473167	0.38304	CD4_24hr_vs_8hr	NS
MA1540.1.NR5A1	4615	0.246124	0.245438	0.703199	0.70559	0.00170535	-0.295916	0.767294	MA1540.1	NR5A1	ENSG00000136931	Nuclear receptor	-1.16634	0.111963	CD4_24hr_vs_8hr	NS
MA0622.1.Mlxip	4301	0.2449	0.318676	1.38526	1.62431	0.312821	1.36338	0.172762	MA0622.1	MLXIP	ENSG00000175727	bHLH	-0.142636	0.750056	CD4_24hr_vs_8hr	NS
MA1121.1.TEAD2	1506	0.543851	0.517427	0.586536	0.563621	-0.0493391	-0.568156	0.569929	MA1121.1	TEAD2	ENSG00000074219	TEA	-0.912611	0.205471	CD4_24hr_vs_8hr	NS
MA0860.1.Rarg(var.2)	3243	0.368971	0.364125	0.707794	0.710632	-0.00200686	-0.315715	0.752219	MA0860.1	RARG	ENSG00000172819	Nuclear receptor	1.49475	0.000373908	CD4_24hr_vs_8hr	expression
MA1655.1.ZNF341	6079	-0.0606616	-0.0673288	0.805033	0.810336	-0.00136435	-0.312288	0.754822	MA1655.1	ZNF341	ENSG00000131061	C2H2 ZF	0.86604	0.0362748	CD4_24hr_vs_8hr	expression
MA0845.1.FOXB1	2994	0.561701	0.483172	0.47794	0.409471	-0.146997	-1.08901	0.276151	MA0845.1	FOXB1	ENSG00000171956	Forkhead	-1.18707	0.153488	CD4_24hr_vs_8hr	NS
MA1597.1.ZNF528	5605	0.457314	0.449069	0.751164	0.759402	-8.22544e-06	-0.305055	0.760324	MA1597.1	ZNF528	ENSG00000167555	C2H2 ZF	-1.49209	0.00030361	CD4_24hr_vs_8hr	expression
MA0795.1.SMAD3	1165	0.219682	0.216567	0.631279	0.593284	-0.0411097	-0.524265	0.600094	MA0795.1	SMAD3	ENSG00000166949	SMAD	0.319167	0.421119	CD4_24hr_vs_8hr	NS
MA1624.1.Stat5a	5701	-0.210199	-0.234822	0.688208	0.64667	-0.0661608	-0.657872	0.51062	MA1624.1	STAT5A	ENSG00000126561	STAT	-0.977692	0.0925286	CD4_24hr_vs_8hr	NS
MA0681.2.PHOX2B	8506	0.568691	0.48395	0.460599	0.393927	-0.151414	-1.11256	0.265898	MA0681.2	PHOX2B	ENSG00000109132	Homeodomain	-1.53848	0.0717693	CD4_24hr_vs_8hr	NS
MA0258.2.ESR2	4324	0.0824265	0.0648927	0.744991	0.742612	-0.0199133	-0.411216	0.680914	MA0258.2	ESR2	ENSG00000140009	Nuclear receptor	-0.973184	0.118788	CD4_24hr_vs_8hr	NS
MA0058.3.MAX	61	0.464382	0.580046	1.76	2.00845	0.364115	1.63695	0.10164	MA0058.3	MAX	ENSG00000125952	bHLH	0.535607	0.221626	CD4_24hr_vs_8hr	NS
MA0507.1.POU2F2	8900	0.742406	0.687157	0.63788	0.574444	-0.118685	-0.938006	0.348242	MA0507.1	POU2F2	ENSG00000028277	Homeodomain,POU	-0.0775979	0.868604	CD4_24hr_vs_8hr	NS
MA0724.1.VENTX	2240	0.669143	0.676303	0.622243	0.600601	-0.0144831	-0.382255	0.702272	MA0724.1	VENTX	ENSG00000151650	Homeodomain	-1.23246	0.122232	CD4_24hr_vs_8hr	NS
MA0706.1.MEOX2	861	0.445628	0.446881	0.531873	0.480593	-0.050027	-0.571825	0.567441	MA0706.1	MEOX2	ENSG00000106511	Homeodomain	-0.883925	0.224746	CD4_24hr_vs_8hr	NS
MA0695.1.ZBTB7C	4111	0.674593	0.719663	1.14355	1.25875	0.160275	0.549799	0.582457	MA0695.1	ZBTB7C	ENSG00000184828	C2H2 ZF	-1.26553	0.0574082	CD4_24hr_vs_8hr	NS
MA0901.2.HOXB13	8058	0.457372	0.420182	0.524024	0.475986	-0.0852282	-0.759566	0.447514	MA0901.2	HOXB13	ENSG00000159184	Homeodomain	-0.566315	0.420683	CD4_24hr_vs_8hr	NS
MA0528.2.ZNF263	22256	1.76294	1.98372	1.57623	1.75704	0.401587	1.8368	0.0662387	MA0528.2	ZNF263	ENSG00000006194	C2H2 ZF	-0.777609	0.0947217	CD4_24hr_vs_8hr	NS
MA0052.4.MEF2A	9582	0.527028	0.456483	0.525087	0.464466	-0.131165	-1.00457	0.315106	MA0052.4	MEF2A	ENSG00000068305	MADS box	-0.0647385	0.870419	CD4_24hr_vs_8hr	NS
MA1632.1.ATF2	6472	0.86349	0.92776	1.01688	1.08114	0.128532	0.380502	0.703573	MA1632.1	ATF2	ENSG00000115966	bZIP	0.263029	0.509296	CD4_24hr_vs_8hr	NS
MA0473.3.ELF1	15910	0.566386	0.582892	0.992051	1.03761	0.0620614	0.025986	0.979268	MA0473.3	ELF1	ENSG00000120690	Ets	-0.246424	0.559554	CD4_24hr_vs_8hr	NS
MA0093.3.USF1	576	0.480173	0.485022	0.595481	0.595537	0.00490466	-0.278853	0.780358	MA0093.3	USF1	ENSG00000158773	bHLH	1.04825	0.0132233	CD4_24hr_vs_8hr	expression
MA0606.1.NFAT5	3979	0.535104	0.515408	0.653967	0.617559	-0.0561045	-0.604238	0.545685	MA0606.1	NFAT5	ENSG00000102908	Rel	-0.385569	0.421747	CD4_24hr_vs_8hr	NS
MA0505.1.Nr5a2	4815	0.161473	0.176851	0.655471	0.6359	-0.00419301	-0.327374	0.743385	MA0505.1	NR5A2	ENSG00000116833	Nuclear receptor	-1.06595	0.15937	CD4_24hr_vs_8hr	NS
MA0029.1.Mecom	6360	0.682399	0.616228	0.542154	0.493344	-0.114982	-0.918252	0.358487	MA0029.1	MECOM	ENSG00000085276	C2H2 ZF	-0.999271	0.173466	CD4_24hr_vs_8hr	NS
MA0804.1.TBX19	2215	0.240274	0.227904	0.609696	0.567184	-0.0548822	-0.597719	0.550027	MA0804.1	TBX19	ENSG00000143178	T-box	-0.178537	0.701429	CD4_24hr_vs_8hr	NS
MA0815.1.TFAP2C(var.3)	8124	0.34219	0.372625	1.51198	1.6836	0.202061	0.772656	0.439726	MA0815.1	TFAP2C	ENSG00000087510	AP-2	-1.05403	0.183216	CD4_24hr_vs_8hr	NS
MA0161.2.NFIC	6377	0.499985	0.514748	0.645652	0.638586	0.00769633	-0.263964	0.791808	MA0161.2	NFIC	ENSG00000141905	SMAD	1.16789	0.0129518	CD4_24hr_vs_8hr	expression
MA1152.1.SOX15	10542	0.684825	0.653399	0.572527	0.540033	-0.0639207	-0.645925	0.518328	MA1152.1	SOX15	ENSG00000129194	Sox	-0.292261	0.657037	CD4_24hr_vs_8hr	NS
MA1501.1.HOXB7	668	0.314261	0.303772	0.568961	0.531447	-0.0480028	-0.561029	0.574778	MA1501.1	HOXB7	ENSG00000260027	Homeodomain	0.270083	0.7142	CD4_24hr_vs_8hr	NS
MA0791.1.POU4F3	6174	0.606532	0.546046	0.510632	0.460117	-0.111001	-0.89702	0.369708	MA0791.1	POU4F3	ENSG00000091010	Homeodomain,POU	-0.577696	0.450142	CD4_24hr_vs_8hr	NS
MA0117.2.Mafb	4782	-0.124882	-0.124148	0.608773	0.604273	-0.00376667	-0.3251	0.745105	MA0117.2	MAFB	ENSG00000204103	bZIP	-1.22756	0.0615159	CD4_24hr_vs_8hr	NS
MA0686.1.SPDEF	2464	-0.922147	-1.05382	1.52065	1.70501	0.052682	-0.0240379	0.980822	MA0686.1	SPDEF	ENSG00000124664	Ets	-0.877377	0.226511	CD4_24hr_vs_8hr	NS
MA0731.1.BCL6B	2956	0.284626	0.245505	0.61122	0.577095	-0.0732464	-0.695663	0.48664	MA0731.1	BCL6B	ENSG00000161940	C2H2 ZF	-0.353178	0.547846	CD4_24hr_vs_8hr	NS
MA0490.2.JUNB	474	0.728843	0.682979	0.725827	0.649553	-0.122138	-0.956422	0.338859	MA0490.2	JUNB	ENSG00000171223	bZIP	0.309821	0.471687	CD4_24hr_vs_8hr	NS
MA1561.1.SOX12	2366	0.558894	0.568356	0.679966	0.682163	0.0116584	-0.242832	0.808135	MA1561.1	SOX12	ENSG00000177732	Sox	1.63009	0.000268559	CD4_24hr_vs_8hr	expression
MA0152.1.NFATC2	6785	0.540827	0.497486	0.644736	0.587701	-0.100375	-0.840352	0.400711	MA0152.1	NFATC2	ENSG00000101096	Rel	0.85774	0.0737228	CD4_24hr_vs_8hr	NS
MA0500.2.MYOG	5138	-0.605731	-0.583851	0.879052	0.893026	0.0358543	-0.113787	0.909407	MA0500.2	MYOG	ENSG00000122180	bHLH	-1.42319	0.0896712	CD4_24hr_vs_8hr	NS
MA1656.1.ZNF449	7103	0.422164	0.452379	1.07811	1.14502	0.09712	0.212967	0.831352	MA1656.1	ZNF449	ENSG00000173275	C2H2 ZF	-0.150888	0.725319	CD4_24hr_vs_8hr	NS
MA1142.1.FOSL1::JUND	2881	0.829073	0.837521	0.87335	0.885861	0.020959	-0.193229	0.84678	MA1142.1	JUND	ENSG00000130522	bZIP	1.12868	0.0227093	CD4_24hr_vs_8hr	expression
MA1525.1.NFATC4	7121	0.255927	0.213083	0.745212	0.680909	-0.107148	-0.876472	0.380773	MA1525.1	NFATC4	ENSG00000100968	Rel	-1.1035	0.0905015	CD4_24hr_vs_8hr	NS
MA1542.1.OSR1	3755	-0.181337	-0.180941	0.790364	0.795171	0.00520378	-0.277257	0.781582	MA1542.1	OSR1	ENSG00000143867	C2H2 ZF	-1.12955	0.132021	CD4_24hr_vs_8hr	NS
MA0112.3.ESR1	3029	-0.02368	-0.0164609	0.672241	0.68462	0.0195984	-0.200485	0.841101	MA0112.3	ESR1	ENSG00000091831	Nuclear receptor	-0.216606	0.583237	CD4_24hr_vs_8hr	NS
MA1606.1.Foxf1	666	0.409959	0.397275	0.484894	0.458529	-0.0390494	-0.513277	0.607758	MA1606.1	FOXF1	ENSG00000103241	Forkhead	-1.37389	0.111418	CD4_24hr_vs_8hr	NS
MA0712.2.OTX2	3503	0.223507	0.233365	0.49036	0.454233	-0.026269	-0.445114	0.656237	MA0712.2	OTX2	ENSG00000165588	Homeodomain	-1.0401	0.187189	CD4_24hr_vs_8hr	NS
MA0868.2.SOX8	5537	0.515583	0.479586	0.586506	0.546547	-0.0759551	-0.710109	0.477636	MA0868.2	SOX8	ENSG00000005513	Sox	-0.767553	0.106054	CD4_24hr_vs_8hr	NS
MA0841.1.NFE2	3301	0.662969	0.717839	0.746242	0.789863	0.0984897	0.220272	0.825659	MA0841.1	NFE2	ENSG00000123405	bZIP	-0.936679	0.175445	CD4_24hr_vs_8hr	NS
MA1565.1.TBX18	8361	0.500533	0.531884	0.791861	0.807778	0.0472687	-0.052909	0.957804	MA1565.1	TBX18	ENSG00000112837	T-box	-1.11644	0.12889	CD4_24hr_vs_8hr	NS
MA0866.1.SOX21	1813	0.151868	0.164009	0.570446	0.536939	-0.0213659	-0.418964	0.675242	MA0866.1	SOX21	ENSG00000125285	Sox	-1.6631	0.0827219	CD4_24hr_vs_8hr	NS
MA0914.1.ISL2	3546	0.124271	0.151198	0.592558	0.570837	0.00520641	-0.277243	0.781593	MA0914.1	ISL2	ENSG00000159556	Homeodomain	-1.23444	0.150011	CD4_24hr_vs_8hr	NS
MA0826.1.OLIG1	256	0.441877	0.376024	0.461141	0.362744	-0.164251	-1.18102	0.237594	MA0826.1	OLIG1	ENSG00000184221	bHLH	-0.900715	0.231283	CD4_24hr_vs_8hr	NS
MA1537.1.NR2F1(var.2)	1169	0.365397	0.425587	0.805743	0.824216	0.0786617	0.114522	0.908824	MA1537.1	NR2F1	ENSG00000175745	Nuclear receptor	-0.891309	0.213509	CD4_24hr_vs_8hr	NS
MA0069.1.PAX6	2336	0.420838	0.412275	0.676349	0.656978	-0.0279342	-0.453995	0.649832	MA0069.1	PAX6	ENSG00000007372	Homeodomain,Paired box	-1.09167	0.0752525	CD4_24hr_vs_8hr	NS
MA1553.1.RARG(var.3)	1029	0.356936	0.361127	0.673639	0.690498	0.02105	-0.192744	0.84716	MA1553.1	RARG	ENSG00000172819	Nuclear receptor	1.49475	0.000373908	CD4_24hr_vs_8hr	expression
MA0491.2.JUND	553	0.875533	0.906657	0.745014	0.742796	0.0289063	-0.150843	0.8801	MA0491.2	JUND	ENSG00000130522	bZIP	1.12868	0.0227093	CD4_24hr_vs_8hr	expression
MA0761.2.ETV1	4399	0.530454	0.535707	0.803246	0.844033	0.0460397	-0.0594637	0.952583	MA0761.2	ETV1	ENSG00000006468	Ets	-1.31189	0.0955842	CD4_24hr_vs_8hr	NS
MA0843.1.TEF	2312	0.535602	0.543161	0.589797	0.559456	-0.0227823	-0.426518	0.669731	MA0843.1	TEF	ENSG00000167074	bZIP	0.0344812	0.930452	CD4_24hr_vs_8hr	NS
MA0469.3.E2F3	699	0.166425	0.16453	1.08863	1.12006	0.0295365	-0.147482	0.882752	MA0469.3	E2F3	ENSG00000112242	E2F	1.20547	0.00608181	CD4_24hr_vs_8hr	expression
MA0142.1.Pou5f1::Sox2	7920	0.520552	0.477697	0.575177	0.521737	-0.0962946	-0.818588	0.413022	MA0142.1	POU5F1	ENSG00000204531	Homeodomain,POU	-0.78942	0.249125	CD4_24hr_vs_8hr	NS
MA0142.1.Pou5f1::Sox2	7920	0.520552	0.477697	0.575177	0.521737	-0.0962946	-0.818588	0.413022	MA0142.1	SOX2	ENSG00000181449	Sox	-1.28274	0.141124	CD4_24hr_vs_8hr	NS
MA1545.1.OVOL2	377	-0.431464	-0.351451	1.33936	1.43729	0.177944	0.644034	0.519553	MA1545.1	OVOL2	ENSG00000125850	C2H2 ZF	-0.809687	0.276377	CD4_24hr_vs_8hr	NS
MA0056.2.MZF1	4707	0.0967406	0.118969	0.754468	0.751223	0.0189833	-0.203766	0.838536	MA0056.2	MZF1	ENSG00000099326	C2H2 ZF	-0.196333	0.579902	CD4_24hr_vs_8hr	NS
MA0465.2.CDX2	6498	0.381483	0.354296	0.546864	0.502285	-0.071766	-0.687767	0.4916	MA0465.2	CDX2	ENSG00000165556	Homeodomain	-0.935341	0.241866	CD4_24hr_vs_8hr	NS
MA1646.1.OSR2	8719	0.164427	0.161593	0.762269	0.784245	0.019143	-0.202914	0.839202	MA1646.1	OSR2	ENSG00000164920	C2H2 ZF	-0.525566	0.469967	CD4_24hr_vs_8hr	NS
MA0625.1.NFATC3	649	-0.00691734	-0.00855536	0.646073	0.61794	-0.0297713	-0.463793	0.642796	MA0625.1	NFATC3	ENSG00000072736	Rel	0.529842	0.231599	CD4_24hr_vs_8hr	NS
MA0140.2.GATA1::TAL1	3103	0.267998	0.257462	0.572243	0.548819	-0.0339608	-0.486137	0.62687	MA0140.2	GATA1	ENSG00000102145	GATA	-1.24382	0.127837	CD4_24hr_vs_8hr	NS
MA0140.2.GATA1::TAL1	3103	0.267998	0.257462	0.572243	0.548819	-0.0339608	-0.486137	0.62687	MA0140.2	TAL1	ENSG00000162367	bHLH	-0.947177	0.125264	CD4_24hr_vs_8hr	NS
MA0905.1.HOXC10	461	0.588592	0.503934	0.592999	0.520618	-0.157039	-1.14256	0.253221	MA0905.1	HOXC10	ENSG00000180818	Homeodomain	-0.727001	0.331812	CD4_24hr_vs_8hr	NS
MA0078.1.Sox17	4539	-0.418644	-0.36681	0.580704	0.537922	0.00905144	-0.256736	0.797382	MA0078.1	SOX17	ENSG00000164736	Sox	-0.945006	0.197732	CD4_24hr_vs_8hr	NS
MA1124.1.ZNF24	9099	0.748172	0.711046	0.604388	0.568372	-0.0731421	-0.695106	0.486989	MA1124.1	ZNF24	ENSG00000172466	C2H2 ZF	-0.305218	0.476149	CD4_24hr_vs_8hr	NS
MA1559.1.SNAI3	1641	0.158715	0.192517	0.681889	0.683742	0.0356557	-0.114845	0.908568	MA1559.1	SNAI3	ENSG00000185669	C2H2 ZF	1.54333	0.013581	CD4_24hr_vs_8hr	expression
MA1134.1.FOS::JUNB	19034	0.224342	0.208865	0.883879	0.935915	0.0365591	-0.110028	0.912388	MA1134.1	FOS	ENSG00000170345	bZIP	-2.60915	1.42871e-06	CD4_24hr_vs_8hr	expression
MA0063.2.NKX2-5	5591	0.42291	0.433688	0.604369	0.579569	-0.0140221	-0.379796	0.704097	MA0063.2	NKX2-5	ENSG00000183072	Homeodomain	-0.645532	0.470788	CD4_24hr_vs_8hr	NS
MA1623.1.Stat2	26741	0.603732	0.576466	0.710941	0.656586	-0.0816206	-0.740326	0.459102	MA1623.1	STAT2	ENSG00000170581	STAT	0.0263559	0.950561	CD4_24hr_vs_8hr	NS
MA1154.1.ZNF282	3740	0.577555	0.604756	0.755704	0.767048	0.038545	-0.0994358	0.920792	MA1154.1	ZNF282	ENSG00000170265	C2H2 ZF	1.33591	0.00181247	CD4_24hr_vs_8hr	expression
MA0073.1.RREB1	21786	0.84671	0.967832	0.904393	1.00814	0.224869	0.894301	0.371161	MA0073.1	RREB1	ENSG00000124782	C2H2 ZF	-0.858106	0.0937772	CD4_24hr_vs_8hr	NS
MA1130.1.FOSL2::JUN	17633	0.267666	0.254355	0.897195	0.950466	0.0399593	-0.0918931	0.926783	MA1130.1	FOSL2	ENSG00000075426	bZIP	-1.99373	0.00019124	CD4_24hr_vs_8hr	expression
MA0259.1.ARNT::HIF1A	1790	0.80586	0.982725	1.593	1.82966	0.413523	1.90047	0.0573719	MA0259.1	HIF1A	ENSG00000100644	bHLH	-0.212639	0.644005	CD4_24hr_vs_8hr	NS
MA0083.3.SRF	2401	0.444709	0.429482	0.667989	0.636884	-0.0463324	-0.55212	0.580866	MA0083.3	SRF	ENSG00000112658	MADS box	0.725385	0.146899	CD4_24hr_vs_8hr	NS
MA0119.1.NFIC::TLX1	5699	0.268188	0.294956	0.680192	0.693405	0.0399807	-0.0917785	0.926874	MA0119.1	NFIC	ENSG00000141905	SMAD	1.16789	0.0129518	CD4_24hr_vs_8hr	expression
MA0700.2.LHX2	3844	0.735046	0.682576	0.597854	0.556529	-0.0937954	-0.805258	0.420671	MA0700.2	LHX2	ENSG00000106689	Homeodomain	-0.795607	0.257346	CD4_24hr_vs_8hr	NS
MA0614.1.Foxj2	729	0.943175	0.975587	0.667614	0.675953	0.0407507	-0.0876718	0.930138	MA0614.1	FOXJ2	ENSG00000065970	Forkhead	1.14386	0.0106023	CD4_24hr_vs_8hr	expression
MA0591.1.Bach1::Mafk	5678	0.153447	0.156929	0.883772	0.983756	0.103465	0.246808	0.805057	MA0591.1	MAFK	ENSG00000198517	bZIP	-0.452135	0.259968	CD4_24hr_vs_8hr	NS
MA0641.1.ELF4	1566	-0.165515	-0.176239	1.20952	1.26338	0.043135	-0.0749558	0.94025	MA0641.1	ELF4	ENSG00000102034	Ets	1.14212	0.0116428	CD4_24hr_vs_8hr	expression
MA0677.1.Nr2f6	4113	0.00478888	0.035573	0.750682	0.767737	0.0478395	-0.0498646	0.96023	MA0677.1	NR2F6	ENSG00000160113	Nuclear receptor	1.07568	0.00908173	CD4_24hr_vs_8hr	expression
MA0659.2.MAFG	5500	0.134423	0.139937	0.560932	0.541358	-0.014061	-0.380004	0.703942	MA0659.2	MAFG	ENSG00000197063	bZIP	0.0416326	0.924382	CD4_24hr_vs_8hr	NS
MA0808.1.TEAD3	3527	0.140539	0.128506	0.602114	0.602247	-0.0119008	-0.368483	0.712513	MA0808.1	TEAD3	ENSG00000007866	TEA	0.416385	0.369002	CD4_24hr_vs_8hr	NS
MA1627.1.Wt1	15364	1.43706	1.62831	1.42961	1.60561	0.367256	1.65371	0.0981869	MA1627.1	WT1	ENSG00000184937	C2H2 ZF	-0.941125	0.199939	CD4_24hr_vs_8hr	NS
MA0908.1.HOXD11	711	0.328571	0.295988	0.561911	0.489976	-0.104518	-0.862445	0.388443	MA0908.1	HOXD11	ENSG00000128713	Homeodomain	-1.35729	0.12018	CD4_24hr_vs_8hr	NS
MA0855.1.RXRB	628	0.116255	0.134883	0.629265	0.63019	0.0195538	-0.200723	0.840915	MA0855.1	RXRB	ENSG00000204231	Nuclear receptor	0.341807	0.389891	CD4_24hr_vs_8hr	NS
MA1570.1.TFAP4(var.2)	5885	0.437414	0.429406	0.581985	0.554658	-0.0353348	-0.493465	0.621684	MA1570.1	TFAP4	ENSG00000090447	bHLH	0.634432	0.145702	CD4_24hr_vs_8hr	NS
MA1101.2.BACH2	10877	0.449906	0.452711	0.865435	0.918707	0.0560773	-0.00592931	0.995269	MA1101.2	BACH2	ENSG00000112182	bZIP	-1.10598	0.0499981	CD4_24hr_vs_8hr	expression
MA0785.1.POU2F1	7474	0.707524	0.649799	0.627411	0.566474	-0.118663	-0.937886	0.348303	MA0785.1	POU2F1	ENSG00000143190	Homeodomain,POU	0.44662	0.261433	CD4_24hr_vs_8hr	NS
MA0885.1.Dlx2	1054	0.479657	0.429975	0.492636	0.421878	-0.120439	-0.947361	0.343455	MA0885.1	DLX2	ENSG00000115844	Homeodomain	-1.03084	0.219395	CD4_24hr_vs_8hr	NS
MA1493.1.HES6	2391	0.388535	0.432015	0.987549	1.07092	0.126854	0.371548	0.71023	MA1493.1	HES6	ENSG00000144485	bHLH	0.843947	0.146936	CD4_24hr_vs_8hr	NS
MA0896.1.Hmx1	464	0.31503	0.298294	0.596572	0.548711	-0.0645975	-0.649534	0.515993	MA0896.1	HMX1	ENSG00000215612	Homeodomain	-1.12502	0.164364	CD4_24hr_vs_8hr	NS
MA0895.1.HMBOX1	2702	0.628303	0.596435	0.626438	0.598415	-0.0598906	-0.624431	0.532345	MA0895.1	HMBOX1	ENSG00000147421	Homeodomain	0.207754	0.585465	CD4_24hr_vs_8hr	NS
MA1141.1.FOS::JUND	5467	0.115982	0.0852552	0.902187	0.990031	0.0571164	-0.000387377	0.999691	MA1141.1	FOS	ENSG00000170345	bZIP	-2.60915	1.42871e-06	CD4_24hr_vs_8hr	expression
MA1579.1.ZBTB26	5499	0.0662395	0.0787564	0.639029	0.625947	-0.000564829	-0.308024	0.758064	MA1579.1	ZBTB26	ENSG00000171448	C2H2 ZF	-0.0948542	0.784792	CD4_24hr_vs_8hr	NS
MA0782.2.PKNOX1	6415	0.161111	0.165982	0.830054	0.844966	0.0197834	-0.199499	0.841873	MA0782.2	PKNOX1	ENSG00000160199	Homeodomain	-0.437388	0.270706	CD4_24hr_vs_8hr	NS
MA0876.1.BSX	552	0.436267	0.434645	0.513131	0.499426	-0.0153276	-0.386759	0.698934	MA0876.1	BSX	ENSG00000188909	Homeodomain	-0.491781	0.501695	CD4_24hr_vs_8hr	NS
MA0786.1.POU3F1	1426	0.483769	0.427687	0.47556	0.421151	-0.110491	-0.894303	0.37116	MA0786.1	POU3F1	ENSG00000185668	Homeodomain,POU	-1.34453	0.0764029	CD4_24hr_vs_8hr	NS
MA0514.1.Sox3	5575	0.98513	0.964901	0.750247	0.739119	-0.0313565	-0.472248	0.63675	MA0514.1	SOX3	ENSG00000134595	Sox	-0.989585	0.207358	CD4_24hr_vs_8hr	NS
MA0699.1.LBX2	820	0.770345	0.606537	0.481713	0.379512	-0.266009	-1.72374	0.0847545	MA0699.1	LBX2	ENSG00000179528	Homeodomain	-0.559832	0.398868	CD4_24hr_vs_8hr	NS
MA0645.1.ETV6	2072	0.0877497	0.0277941	1.52936	1.70655	0.117236	0.320256	0.748775	MA0645.1	ETV6	ENSG00000139083	Ets	0.317213	0.399121	CD4_24hr_vs_8hr	NS
MA1468.1.ATOH7	2206	0.534492	0.480928	0.541203	0.477927	-0.116839	-0.928161	0.353324	MA1468.1	ATOH7	ENSG00000179774	bHLH	-0.298934	0.696973	CD4_24hr_vs_8hr	NS
MA1141.1.FOS::JUND	5467	0.115982	0.0852552	0.902187	0.990031	0.0571164	-0.000387377	0.999691	MA1141.1	JUND	ENSG00000130522	bZIP	1.12868	0.0227093	CD4_24hr_vs_8hr	expression
MA0842.2.NRL	3994	0.194789	0.194791	0.610797	0.600927	-0.009868	-0.357641	0.720612	MA0842.2	NRL	ENSG00000129535	bZIP	-0.586638	0.25103	CD4_24hr_vs_8hr	NS
MA1648.1.TCF12(var.2)	11087	0.706091	0.805833	1.27936	1.40859	0.228969	0.91617	0.359578	MA1648.1	TCF12	ENSG00000140262	bHLH	0.715017	0.114532	CD4_24hr_vs_8hr	NS
MA0727.1.NR3C2	286	-0.0531842	-0.0503018	0.730523	0.800184	0.0725435	0.0818915	0.934733	MA0727.1	NR3C2	ENSG00000151623	Nuclear receptor	-0.24705	0.525852	CD4_24hr_vs_8hr	NS
MA0777.1.MYBL2	767	-0.0307102	0.021745	0.767268	0.779134	0.0643211	0.0380378	0.969658	MA0777.1	MYBL2	ENSG00000101057	Myb/SANT	4.75545	4.68342e-10	CD4_24hr_vs_8hr	expression
MA1523.1.MSANTD3	6516	0.606266	0.636285	0.782507	0.817368	0.0648801	0.0410196	0.96728	MA1523.1	MSANTD3	ENSG00000066697	MADF	1.65386	0.000273395	CD4_24hr_vs_8hr	expression
MA0602.1.Arid5a	4229	0.390502	0.319953	0.453956	0.384348	-0.140157	-1.05252	0.29256	MA0602.1	ARID5A	ENSG00000196843	ARID/BRIGHT	0.261437	0.530662	CD4_24hr_vs_8hr	NS
MA0515.1.Sox6	4332	0.566312	0.555805	0.705346	0.689568	-0.0262842	-0.445195	0.656179	MA0515.1	SOX6	ENSG00000110693	Sox	-1.00897	0.0805881	CD4_24hr_vs_8hr	NS
MA0510.2.RFX5	1074	0.13978	0.144328	0.792257	0.818059	0.0303493	-0.143147	0.886174	MA0510.2	RFX5	ENSG00000143390	RFX	0.626867	0.147536	CD4_24hr_vs_8hr	NS
MA1558.1.SNAI1	8739	0.104391	0.146682	0.733935	0.762455	0.0708115	0.0726537	0.942082	MA1558.1	SNAI1	ENSG00000124216	C2H2 ZF	-0.913045	0.131665	CD4_24hr_vs_8hr	NS
MA0099.3.FOS::JUN	19933	0.353114	0.365502	0.911893	0.965673	0.0661682	0.0478891	0.961805	MA0099.3	FOS	ENSG00000170345	bZIP	-2.60915	1.42871e-06	CD4_24hr_vs_8hr	expression
MA0737.1.GLIS3	1588	0.199252	0.25334	0.742624	0.756361	0.0678254	0.056728	0.954762	MA0737.1	GLIS3	ENSG00000107249	C2H2 ZF	-1.62159	0.000531956	CD4_24hr_vs_8hr	expression
MA0609.2.CREM	3692	0.655229	0.754389	1.6162	1.84672	0.32968	1.4533	0.14614	MA0609.2	CREM	ENSG00000095794	bZIP	0.0566534	0.896081	CD4_24hr_vs_8hr	NS
MA1143.1.FOSL1::JUND(var.2)	2077	1.08633	1.15037	0.999	1.07172	0.13676	0.424385	0.671285	MA1143.1	FOSL1	ENSG00000175592	bZIP	-0.917026	0.0959948	CD4_24hr_vs_8hr	NS
MA0478.1.FOSL2	19896	0.397204	0.412372	0.87413	0.927639	0.068677	0.0612698	0.951144	MA0478.1	FOSL2	ENSG00000075426	bZIP	-1.99373	0.00019124	CD4_24hr_vs_8hr	expression
MA0139.1.CTCF	14444	0.865075	0.910108	1.10384	1.12803	0.0692226	0.0641795	0.948827	MA0139.1	CTCF	ENSG00000102974	C2H2 ZF	1.01111	0.0379496	CD4_24hr_vs_8hr	expression
MA0660.1.MEF2B	5967	0.549252	0.479306	0.535487	0.476662	-0.128771	-0.991799	0.321296	MA0660.1	MEF2B	ENSG00000213999	MADS box	-0.451177	0.522324	CD4_24hr_vs_8hr	NS
MA0682.2.PITX1	1831	0.254845	0.225726	0.492436	0.449256	-0.0722989	-0.690609	0.489811	MA0682.2	PITX1	ENSG00000069011	Homeodomain	-1.19872	0.0825707	CD4_24hr_vs_8hr	NS
MA0125.1.Nobox	3079	0.501302	0.49075	0.63597	0.607595	-0.0389282	-0.51263	0.60821	MA0125.1	NOBOX	ENSG00000106410	Homeodomain	-1.08264	0.18068	CD4_24hr_vs_8hr	NS
MA0037.3.GATA3	4662	0.306317	0.277818	0.600965	0.575687	-0.0537766	-0.591823	0.553969	MA0037.3	GATA3	ENSG00000107485	GATA	-0.417516	0.270543	CD4_24hr_vs_8hr	NS
MA1635.1.BHLHE22(var.2)	3200	-0.513296	-0.487707	0.900527	0.910119	0.0351816	-0.117374	0.906564	MA1635.1	BHLHE22	ENSG00000180828	bHLH	-1.19951	0.141603	CD4_24hr_vs_8hr	NS
MA1138.1.FOSL2::JUNB	21465	0.35605	0.377453	0.899027	0.949068	0.0714436	0.0760249	0.939399	MA1138.1	FOSL2	ENSG00000075426	bZIP	-1.99373	0.00019124	CD4_24hr_vs_8hr	expression
MA1137.1.FOSL1::JUNB	518	0.455101	0.516253	0.731654	0.751788	0.0812857	0.128517	0.89774	MA1137.1	FOSL1	ENSG00000175592	bZIP	-0.917026	0.0959948	CD4_24hr_vs_8hr	NS
MA1137.1.FOSL1::JUNB	518	0.455101	0.516253	0.731654	0.751788	0.0812857	0.128517	0.89774	MA1137.1	JUNB	ENSG00000171223	bZIP	0.309821	0.471687	CD4_24hr_vs_8hr	NS
MA0509.2.RFX1	5096	0.669044	0.708177	0.957589	0.991255	0.0727984	0.0832509	0.933652	MA0509.2	RFX1	ENSG00000132005	RFX	0.832944	0.0327649	CD4_24hr_vs_8hr	expression
MA0442.2.SOX10	9420	0.684278	0.676999	0.686402	0.682685	-0.010997	-0.363662	0.71611	MA0442.2	SOX10	ENSG00000100146	Sox	-1.0964	0.145306	CD4_24hr_vs_8hr	NS
MA1583.1.ZFP57	1306	-1.99981	-2.32388	2.01854	2.30642	-0.0361882	-0.498017	0.618472	MA1583.1	ZFP57	ENSG00000204644	C2H2 ZF	-0.699756	0.347111	CD4_24hr_vs_8hr	NS
MA0613.1.FOXG1	2053	0.22338	0.209598	0.508802	0.507567	-0.0150173	-0.385104	0.70016	MA0613.1	FOXG1	ENSG00000176165	Forkhead	-1.06723	0.171447	CD4_24hr_vs_8hr	NS
MA1147.1.NR4A2::RXRA	901	0.208354	0.249103	0.913396	0.946274	0.0736278	0.0876743	0.930136	MA1147.1	NR4A2	ENSG00000153234	Nuclear receptor	-0.967207	0.0499605	CD4_24hr_vs_8hr	expression
MA1470.1.BACH2(var.2)	1777	0.66139	0.690143	0.891384	0.936833	0.074202	0.0907367	0.927702	MA1470.1	BACH2	ENSG00000112182	bZIP	-1.10598	0.0499981	CD4_24hr_vs_8hr	expression
MA0470.2.E2F4	952	0.291345	0.329031	1.54534	1.74725	0.239593	0.972828	0.330639	MA0470.2	E2F4	ENSG00000205250	E2F	0.674091	0.177721	CD4_24hr_vs_8hr	NS
MA0851.1.Foxj3	6062	0.548542	0.546926	0.51671	0.508544	-0.00978309	-0.357188	0.720951	MA0851.1	FOXJ3	ENSG00000198815	Forkhead	-0.0404921	0.927829	CD4_24hr_vs_8hr	NS
MA0111.1.Spz1	5009	-0.0687976	-0.0419648	0.675875	0.671053	0.0220114	-0.187616	0.851178	MA0111.1	SPZ1	ENSG00000164299	Unknown	-1.16058	0.156708	CD4_24hr_vs_8hr	NS
MA0784.1.POU1F1	7397	0.743006	0.683625	0.62842	0.566295	-0.121505	-0.953045	0.340567	MA0784.1	POU1F1	ENSG00000064835	Homeodomain,POU	-1.78875	0.1132	CD4_24hr_vs_8hr	NS
MA0499.2.MYOD1	2756	-0.327466	-0.339788	0.79929	0.81348	0.00186819	-0.295047	0.767958	MA0499.2	MYOD1	ENSG00000129152	bHLH	-0.888989	0.278676	CD4_24hr_vs_8hr	NS
MA0626.1.Npas2	1161	0.344484	0.409409	1.10859	1.26823	0.224566	0.892687	0.372025	MA0626.1	NPAS2	ENSG00000170485	bHLH	0.48811	0.19557	CD4_24hr_vs_8hr	NS
MA1119.1.SIX2	4484	0.0457534	0.039325	0.631225	0.587902	-0.0497515	-0.570355	0.568437	MA1119.1	SIX2	ENSG00000170577	Homeodomain	-1.28548	0.115377	CD4_24hr_vs_8hr	NS
MA0062.3.GABPA	16964	0.617049	0.632493	0.959188	0.996865	0.0531207	-0.0216978	0.982689	MA0062.3	GABPA	ENSG00000154727	Ets	-0.079512	0.842796	CD4_24hr_vs_8hr	NS
MA0696.1.ZIC1	5704	0.0440584	0.043838	1.2808	1.38479	0.103773	0.248451	0.803786	MA0696.1	ZIC1	ENSG00000152977	C2H2 ZF	-0.888121	0.191315	CD4_24hr_vs_8hr	NS
MA1634.1.BATF	19674	0.478667	0.484403	0.865168	0.888096	0.0286633	-0.152139	0.879078	MA1634.1	BATF	ENSG00000156127	bZIP	0.353427	0.408047	CD4_24hr_vs_8hr	NS
MA1629.1.Zic2	11354	0.173295	0.191611	0.840612	0.86838	0.0460839	-0.0592281	0.95277	MA1629.1	ZIC2	ENSG00000043355	C2H2 ZF	-1.12377	0.167825	CD4_24hr_vs_8hr	NS
MA0475.2.FLI1	35	-2.35432	-2.36812	1.92059	2.00921	0.0748123	0.0939916	0.925116	MA0475.2	FLI1	ENSG00000151702	Ets	1.21545	0.0105767	CD4_24hr_vs_8hr	expression
MA0899.1.HOXA10	4885	0.426671	0.386155	0.532964	0.476514	-0.0969664	-0.822171	0.41098	MA0899.1	HOXA10	ENSG00000253293	Homeodomain	-1.25072	0.114734	CD4_24hr_vs_8hr	NS
MA0672.1.NKX2-3	5743	0.341149	0.338334	0.645186	0.620813	-0.0271872	-0.450011	0.652702	MA0672.1	NKX2-3	ENSG00000119919	Homeodomain	-1.0503	0.220828	CD4_24hr_vs_8hr	NS
MA1116.1.RBPJ	8738	0.0961335	0.121498	0.832649	0.880642	0.0733574	0.0862322	0.931282	MA1116.1	RBPJ	ENSG00000168214	CSL	-0.0373597	0.933454	CD4_24hr_vs_8hr	NS
MA1576.1.THRB(var.3)	3339	0.401074	0.433092	0.817333	0.85175	0.0664348	0.0493112	0.960671	MA1576.1	THRB	ENSG00000151090	Nuclear receptor	-1.28437	0.0797386	CD4_24hr_vs_8hr	NS
MA0821.1.HES5	1953	0.397354	0.400381	1.04473	1.16313	0.121427	0.342606	0.731895	MA0821.1	HES5	ENSG00000197921	bHLH	-0.233754	0.743839	CD4_24hr_vs_8hr	NS
MA0718.1.RAX	160	0.643266	0.595098	0.565868	0.511454	-0.102582	-0.852119	0.394148	MA0718.1	RAX	ENSG00000134438	Homeodomain	-0.762332	0.259073	CD4_24hr_vs_8hr	NS
MA0758.1.E2F7	2008	0.356899	0.38247	0.96026	1.01598	0.0812886	0.128532	0.897728	MA0758.1	E2F7	ENSG00000165891	E2F	1.99276	0.000208386	CD4_24hr_vs_8hr	expression
MA1115.1.POU5F1	8846	0.77716	0.744114	0.647343	0.602613	-0.077776	-0.719821	0.471635	MA1115.1	POU5F1	ENSG00000204531	Homeodomain,POU	-0.78942	0.249125	CD4_24hr_vs_8hr	NS
MA1654.1.ZNF16	4118	0.295651	0.308581	0.79566	0.809799	0.0270686	-0.160644	0.872374	MA1654.1	ZNF16	ENSG00000170631	C2H2 ZF	0.240795	0.467885	CD4_24hr_vs_8hr	NS
MA1471.1.BARX2	5624	0.539983	0.467804	0.531733	0.46351	-0.140402	-1.05383	0.29196	MA1471.1	BARX2	ENSG00000043039	Homeodomain	-0.814157	0.23735	CD4_24hr_vs_8hr	NS
MA0145.3.TFCP2	1949	-0.453024	-0.445122	0.814729	0.806375	-0.000452399	-0.307424	0.758521	MA0145.3	TFCP2	ENSG00000135457	Grainyhead	0.858329	0.0553311	CD4_24hr_vs_8hr	NS
MA1527.1.NFIC(var.2)	5169	0.445827	0.490355	0.778482	0.816145	0.0821909	0.133345	0.893921	MA1527.1	NFIC	ENSG00000141905	SMAD	1.16789	0.0129518	CD4_24hr_vs_8hr	expression
MA1633.1.BACH1	13240	0.274713	0.287961	0.816674	0.89036	0.0869352	0.158648	0.873946	MA1633.1	BACH1	ENSG00000156273	bZIP	-1.21155	0.010866	CD4_24hr_vs_8hr	expression
MA0850.1.FOXP3	3568	0.85926	0.921173	0.643542	0.675831	0.0942016	0.197402	0.843513	MA0850.1	FOXP3	ENSG00000049768	Forkhead	1.39698	0.00373572	CD4_24hr_vs_8hr	expression
MA1621.1.Rbpjl	6780	0.204288	0.2356	0.704471	0.734166	0.0610072	0.0203639	0.983753	MA1621.1	RBPJL	ENSG00000124232	CSL	-1.06697	0.19767	CD4_24hr_vs_8hr	NS
MA0719.1.RHOXF1	1888	0.3058	0.252148	0.474454	0.428199	-0.0999081	-0.837859	0.40211	MA0719.1	RHOXF1	ENSG00000101883	Homeodomain	-1.18741	0.271209	CD4_24hr_vs_8hr	NS
MA0476.1.FOS	7253	0.350043	0.369725	0.85082	0.931947	0.100809	0.232645	0.816037	MA0476.1	FOS	ENSG00000170345	bZIP	-2.60915	1.42871e-06	CD4_24hr_vs_8hr	expression
MA0492.1.JUND(var.2)	6222	0.884381	0.940237	0.902464	0.9487	0.102092	0.239485	0.81073	MA0492.1	JUND	ENSG00000130522	bZIP	1.12868	0.0227093	CD4_24hr_vs_8hr	expression
MA0692.1.TFEB	3149	0.988342	1.04026	0.871248	0.914731	0.0953969	0.203777	0.838527	MA0692.1	TFEB	ENSG00000112561	bHLH	0.509764	0.155908	CD4_24hr_vs_8hr	NS
MA1585.1.ZKSCAN1	4481	0.425269	0.42236	0.744362	0.731909	-0.0153617	-0.386941	0.6988	MA1585.1	ZKSCAN1	ENSG00000106261	C2H2 ZF	-0.229005	0.58571	CD4_24hr_vs_8hr	NS
MA1146.1.NR1H4::RXRA	817	0.168441	0.19353	0.618681	0.606506	0.0129139	-0.236136	0.813327	MA1146.1	NR1H4	ENSG00000012504	Nuclear receptor	-1.02715	0.214233	CD4_24hr_vs_8hr	NS
MA1146.1.NR1H4::RXRA	817	0.168441	0.19353	0.618681	0.606506	0.0129139	-0.236136	0.813327	MA1146.1	RXRA	ENSG00000186350	Nuclear receptor	0.014903	0.967727	CD4_24hr_vs_8hr	NS
MA0066.1.PPARG	2932	0.0131885	0.00533566	0.587484	0.56233	-0.0330063	-0.481047	0.630483	MA0066.1	PPARG	ENSG00000132170	Nuclear receptor	-1.40705	0.0742272	CD4_24hr_vs_8hr	NS
MA0856.1.RXRG	1366	-0.0455663	-0.0413861	0.682363	0.669397	-0.00878594	-0.35187	0.724936	MA0856.1	RXRG	ENSG00000143171	Nuclear receptor	-1.47436	0.109941	CD4_24hr_vs_8hr	NS
MA1467.1.ATOH1(var.2)	3435	-0.0927854	-0.0641776	0.73456	0.735398	0.0294451	-0.147969	0.882367	MA1467.1	ATOH1	ENSG00000172238	bHLH	-1.13788	0.175594	CD4_24hr_vs_8hr	NS
MA1104.2.GATA6	5601	0.59063	0.544024	0.564332	0.518463	-0.0924756	-0.798219	0.424743	MA1104.2	GATA6	ENSG00000141448	GATA	-1.05635	0.166896	CD4_24hr_vs_8hr	NS
MA1603.1.Dmrt1	4377	0.17148	0.150956	0.545227	0.4997	-0.0660515	-0.657289	0.510995	MA1603.1	DMRT1	ENSG00000137090	DM	-1.12336	0.187718	CD4_24hr_vs_8hr	NS
MA0081.2.SPIB	18139	0.907218	0.930052	0.931055	0.942429	0.0342085	-0.122564	0.902452	MA0081.2	SPIB	ENSG00000269404	Ets	0.300145	0.623628	CD4_24hr_vs_8hr	NS
MA0090.3.TEAD1	4467	0.233466	0.227457	0.558511	0.531589	-0.0329307	-0.480643	0.63077	MA0090.3	TEAD1	ENSG00000187079	TEA	-0.0415624	0.927798	CD4_24hr_vs_8hr	NS
MA0642.1.EN2	334	0.024411	0.0840183	2.19881	2.53728	0.398085	1.81813	0.0690445	MA0642.1	EN2	ENSG00000164778	Homeodomain	-1.37425	0.118628	CD4_24hr_vs_8hr	NS
MA1497.1.HOXA6	2404	0.290391	0.238869	0.585438	0.530512	-0.106448	-0.87274	0.382805	MA1497.1	HOXA6	ENSG00000106006	Homeodomain	-1.00716	0.214811	CD4_24hr_vs_8hr	NS
MA0591.1.Bach1::Mafk	5678	0.153447	0.156929	0.883772	0.983756	0.103465	0.246808	0.805057	MA0591.1	BACH1	ENSG00000156273	bZIP	-1.21155	0.010866	CD4_24hr_vs_8hr	expression
MA1581.1.ZBTB6	7009	-0.0723555	-0.0905766	0.792496	0.811711	0.000993863	-0.299711	0.764398	MA1581.1	ZBTB6	ENSG00000186130	C2H2 ZF	-0.352022	0.374228	CD4_24hr_vs_8hr	NS
MA0040.1.Foxq1	5968	0.424274	0.405587	0.501774	0.467914	-0.0525458	-0.585259	0.558374	MA0040.1	FOXQ1	ENSG00000164379	Forkhead	-1.14377	0.14809	CD4_24hr_vs_8hr	NS
MA1100.2.ASCL1	2504	-0.741816	-0.701861	0.785329	0.78877	0.0433958	-0.0735646	0.941357	MA1100.2	ASCL1	ENSG00000139352	bHLH	-1.21779	0.135544	CD4_24hr_vs_8hr	NS
MA1555.1.RXRB(var.2)	3080	0.27057	0.278676	0.884548	0.941315	0.0648724	0.0409786	0.967313	MA1555.1	RXRB	ENSG00000204231	Nuclear receptor	0.341807	0.389891	CD4_24hr_vs_8hr	NS
MA0790.1.POU4F1	6997	0.574314	0.512979	0.505152	0.452988	-0.113499	-0.910344	0.362641	MA0790.1	POU4F1	ENSG00000152192	Homeodomain,POU	-0.72141	0.26845	CD4_24hr_vs_8hr	NS
MA0772.1.IRF7	12193	0.51719	0.479567	0.819675	0.749641	-0.107657	-0.879189	0.379299	MA0772.1	IRF7	ENSG00000185507	IRF	-0.064634	0.869733	CD4_24hr_vs_8hr	NS
MA0765.2.ETV5	8160	0.434152	0.456555	1.67992	1.86843	0.210917	0.819889	0.412279	MA0765.2	ETV5	ENSG00000244405	Ets	-0.490961	0.407108	CD4_24hr_vs_8hr	NS
MA0669.1.NEUROG2	585	0.574632	0.507988	0.601715	0.543739	-0.12462	-0.96966	0.332216	MA0669.1	NEUROG2	ENSG00000178403	bHLH	-0.871061	0.220242	CD4_24hr_vs_8hr	NS
MA0865.1.E2F8	3131	0.467154	0.523099	1.04157	1.09762	0.111989	0.292268	0.770081	MA0865.1	E2F8	ENSG00000129173	E2F	2.05514	0.00107519	CD4_24hr_vs_8hr	expression
MA0119.1.NFIC::TLX1	5699	0.268188	0.294956	0.680192	0.693405	0.0399807	-0.0917785	0.926874	MA0119.1	TLX1	ENSG00000107807	Homeodomain	-1.04547	0.176459	CD4_24hr_vs_8hr	NS
MA1131.1.FOSL2::JUN(var.2)	1583	0.888607	0.947561	0.929493	0.99994	0.129401	0.385135	0.700138	MA1131.1	FOSL2	ENSG00000075426	bZIP	-1.99373	0.00019124	CD4_24hr_vs_8hr	expression
MA1143.1.FOSL1::JUND(var.2)	2077	1.08633	1.15037	0.999	1.07172	0.13676	0.424385	0.671285	MA1143.1	JUND	ENSG00000130522	bZIP	1.12868	0.0227093	CD4_24hr_vs_8hr	expression
MA0690.1.TBX21	6038	0.142068	0.169436	0.692719	0.666151	0.00079982	-0.300745	0.763609	MA0690.1	TBX21	ENSG00000073861	T-box	0.602352	0.282275	CD4_24hr_vs_8hr	NS
MA0707.1.MNX1	1175	0.526493	0.446622	0.499422	0.416525	-0.162768	-1.17311	0.24075	MA0707.1	MNX1	ENSG00000130675	Homeodomain	-1.10825	0.159613	CD4_24hr_vs_8hr	NS
MA0526.3.USF2	5695	0.736477	0.802963	0.954198	1.02842	0.140709	0.445443	0.656	MA0526.3	USF2	ENSG00000105698	bHLH	1.34298	0.00392505	CD4_24hr_vs_8hr	expression
MA1139.1.FOSL2::JUNB(var.2)	547	0.502552	0.441424	0.738484	0.737199	-0.0624128	-0.637883	0.52355	MA1139.1	JUNB	ENSG00000171223	bZIP	0.309821	0.471687	CD4_24hr_vs_8hr	NS
MA0513.1.SMAD2::SMAD3::SMAD4	8672	0.322314	0.352191	0.746753	0.766332	0.0494545	-0.0412515	0.967095	MA0513.1	SMAD2	ENSG00000175387	NA	0.589027	0.189133	CD4_24hr_vs_8hr	NS
MA0513.1.SMAD2::SMAD3::SMAD4	8672	0.322314	0.352191	0.746753	0.766332	0.0494545	-0.0412515	0.967095	MA0513.1	SMAD3	ENSG00000166949	SMAD	0.319167	0.421119	CD4_24hr_vs_8hr	NS
MA0513.1.SMAD2::SMAD3::SMAD4	8672	0.322314	0.352191	0.746753	0.766332	0.0494545	-0.0412515	0.967095	MA0513.1	SMAD4	ENSG00000141646	SMAD	0.164844	0.682637	CD4_24hr_vs_8hr	NS
MA0745.2.SNAI2	3055	0.270919	0.291366	0.598033	0.586706	0.00911924	-0.256375	0.797661	MA0745.2	SNAI2	ENSG00000019549	C2H2 ZF	-0.703954	0.400145	CD4_24hr_vs_8hr	NS
MA0519.1.Stat5a::Stat5b	6861	-0.330425	-0.318162	0.721022	0.682851	-0.0259085	-0.443191	0.657628	MA0519.1	STAT5A	ENSG00000126561	STAT	-0.977692	0.0925286	CD4_24hr_vs_8hr	NS
MA0519.1.Stat5a::Stat5b	6861	-0.330425	-0.318162	0.721022	0.682851	-0.0259085	-0.443191	0.657628	MA0519.1	STAT5B	ENSG00000173757	STAT	-0.382697	0.383268	CD4_24hr_vs_8hr	NS
MA0694.1.ZBTB7B	767	0.507249	0.578588	1.03188	1.1274	0.166862	0.584926	0.558597	MA0694.1	ZBTB7B	ENSG00000160685	C2H2 ZF	2.10546	5.73712e-05	CD4_24hr_vs_8hr	expression
MA0065.2.Pparg::Rxra	6591	0.737916	0.766	0.752519	0.759984	0.0355484	-0.115418	0.908114	MA0065.2	PPARG	ENSG00000132170	Nuclear receptor	-1.40705	0.0742272	CD4_24hr_vs_8hr	NS
MA0065.2.Pparg::Rxra	6591	0.737916	0.766	0.752519	0.759984	0.0355484	-0.115418	0.908114	MA0065.2	RXRA	ENSG00000186350	Nuclear receptor	0.014903	0.967727	CD4_24hr_vs_8hr	NS
MA0493.1.Klf1	9689	1.12067	1.2584	1.08275	1.1868	0.241785	0.98452	0.32486	MA0493.1	KLF1	ENSG00000105610	C2H2 ZF	0.103145	0.873895	CD4_24hr_vs_8hr	NS
MA0488.1.JUN	6893	0.909912	1.00002	0.964786	1.02602	0.151336	0.502121	0.615582	MA0488.1	JUN	ENSG00000177606	bZIP	-0.629717	0.157553	CD4_24hr_vs_8hr	NS
MA1128.1.FOSL1::JUN	1211	0.39744	0.470627	1.02068	1.15481	0.207321	0.800712	0.423299	MA1128.1	FOSL1	ENSG00000175592	bZIP	-0.917026	0.0959948	CD4_24hr_vs_8hr	NS
MA1128.1.FOSL1::JUN	1211	0.39744	0.470627	1.02068	1.15481	0.207321	0.800712	0.423299	MA1128.1	JUN	ENSG00000177606	bZIP	-0.629717	0.157553	CD4_24hr_vs_8hr	NS
MA0598.3.EHF	15273	0.788322	0.807504	0.979009	1.01015	0.0503178	-0.0366472	0.970766	MA0598.3	EHF	ENSG00000135373	Ets	-0.971642	0.198037	CD4_24hr_vs_8hr	NS
MA1126.1.FOS::JUN(var.2)	3533	0.754268	0.817397	1.1262	1.23188	0.16881	0.595316	0.551632	MA1126.1	FOS	ENSG00000170345	bZIP	-2.60915	1.42871e-06	CD4_24hr_vs_8hr	expression
MA0873.1.HOXD12	590	0.464776	0.436649	0.688437	0.635497	-0.0810668	-0.737372	0.460896	MA0873.1	HOXD12	ENSG00000170178	Homeodomain	-0.670798	0.392074	CD4_24hr_vs_8hr	NS
MA1511.1.KLF10	2777	1.04734	1.13413	1.06386	1.152	0.174939	0.628005	0.530001	MA1511.1	KLF10	ENSG00000155090	C2H2 ZF	-1.71677	0.00118668	CD4_24hr_vs_8hr	expression
MA1127.1.FOSB::JUN	4652	1.37453	1.59064	1.49382	1.68769	0.409984	1.88159	0.0598915	MA1127.1	JUN	ENSG00000177606	bZIP	-0.629717	0.157553	CD4_24hr_vs_8hr	NS
MA0904.2.HOXB5	598	1.28699	1.23437	0.71027	0.675249	-0.0876455	-0.772459	0.439843	MA0904.2	HOXB5	ENSG00000120075	Homeodomain	-1.46159	0.0940991	CD4_24hr_vs_8hr	NS
MA0835.2.BATF3	709	0.695429	0.70056	0.725948	0.682238	-0.0385789	-0.510767	0.609514	MA0835.2	BATF3	ENSG00000123685	bZIP	-0.309357	0.522103	CD4_24hr_vs_8hr	NS
MA0898.1.Hmx3	2713	0.428912	0.384619	0.530051	0.479158	-0.0951858	-0.812674	0.416405	MA0898.1	HMX3	ENSG00000188620	Homeodomain	-1.25402	0.129243	CD4_24hr_vs_8hr	NS
MA1149.1.RARA::RXRG	3378	0.361075	0.395971	0.911708	0.954875	0.0780624	0.111326	0.911358	MA1149.1	RARA	ENSG00000131759	Nuclear receptor	0.214968	0.598117	CD4_24hr_vs_8hr	NS
MA1149.1.RARA::RXRG	3378	0.361075	0.395971	0.911708	0.954875	0.0780624	0.111326	0.911358	MA1149.1	RXRG	ENSG00000143171	Nuclear receptor	-1.47436	0.109941	CD4_24hr_vs_8hr	NS
MA0663.1.MLX	232	0.84339	0.929082	1.41496	1.51123	0.181964	0.665472	0.505749	MA0663.1	MLX	ENSG00000108788	bHLH	1.28261	0.00908308	CD4_24hr_vs_8hr	expression
MA0688.1.TBX2	5441	0.195336	0.211927	0.670539	0.642143	-0.0118055	-0.367975	0.712892	MA0688.1	TBX2	ENSG00000121068	T-box	-1.18933	0.117148	CD4_24hr_vs_8hr	NS
MA0088.2.ZNF143	3976	-0.035278	-0.092962	0.933063	1.0287	0.0379551	-0.102582	0.918295	MA0088.2	ZNF143	ENSG00000166478	C2H2 ZF	-0.303589	0.488412	CD4_24hr_vs_8hr	NS
MA0024.3.E2F1	1300	0.228908	0.236845	1.62397	1.80911	0.193084	0.724778	0.468588	MA0024.3	E2F1	ENSG00000101412	E2F	5.6213	5.36682e-11	CD4_24hr_vs_8hr	expression
MA1150.1.RORB	3934	0.212639	0.207609	0.577384	0.543582	-0.0388318	-0.512116	0.60857	MA1150.1	RORB	ENSG00000198963	Nuclear receptor	-0.899012	0.180429	CD4_24hr_vs_8hr	NS
MA1528.1.NFIX(var.2)	2565	0.464661	0.536465	1.04142	1.12532	0.155702	0.525409	0.599299	MA1528.1	NFIX	ENSG00000008441	SMAD	-0.267785	0.529227	CD4_24hr_vs_8hr	NS
MA1573.1.THAP11	3915	0.269222	0.297178	1.18559	1.36225	0.204623	0.786325	0.431677	MA1573.1	THAP11	ENSG00000168286	THAP finger	1.27642	0.0060629	CD4_24hr_vs_8hr	expression
MA0159.1.RARA::RXRA	2137	0.458136	0.470497	0.772136	0.781904	0.0221281	-0.186993	0.851666	MA0159.1	RARA	ENSG00000131759	Nuclear receptor	0.214968	0.598117	CD4_24hr_vs_8hr	NS
MA0159.1.RARA::RXRA	2137	0.458136	0.470497	0.772136	0.781904	0.0221281	-0.186993	0.851666	MA0159.1	RXRA	ENSG00000186350	Nuclear receptor	0.014903	0.967727	CD4_24hr_vs_8hr	NS
MA1123.2.TWIST1	1632	0.394765	0.354152	0.60871	0.565411	-0.0839114	-0.752543	0.451725	MA1123.2	TWIST1	ENSG00000122691	bHLH	-0.759727	0.311234	CD4_24hr_vs_8hr	NS
MA0635.1.BARHL2	1628	0.245591	0.189495	0.605681	0.568044	-0.0937337	-0.804929	0.420861	MA0635.1	BARHL2	ENSG00000143032	Homeodomain	-1.15641	0.158695	CD4_24hr_vs_8hr	NS
MA0043.3.HLF	3186	0.49769	0.470774	0.571098	0.510987	-0.087027	-0.76916	0.441798	MA0043.3	HLF	ENSG00000108924	bZIP	-0.2062	0.694157	CD4_24hr_vs_8hr	NS
MA1563.1.SOX18	3940	-0.309091	-0.310823	0.741449	0.746407	0.00322527	-0.28781	0.773492	MA1563.1	SOX18	ENSG00000203883	Sox	-0.344869	0.650125	CD4_24hr_vs_8hr	NS
MA0889.1.GBX1	80	0.222203	0.349238	0.595611	0.656971	0.188395	0.69977	0.484071	MA0889.1	GBX1	ENSG00000164900	Homeodomain	-1.20356	0.145702	CD4_24hr_vs_8hr	NS
MA0794.1.PROX1	1750	0.0517422	0.0642215	0.819694	0.848505	0.041291	-0.0847904	0.932428	MA0794.1	PROX1	ENSG00000117707	Prospero	-0.989751	0.159599	CD4_24hr_vs_8hr	NS
MA0844.1.XBP1	1298	0.566466	0.696359	1.61991	1.86593	0.375909	1.69986	0.089158	MA0844.1	XBP1	ENSG00000100219	bZIP	-0.983996	0.0686517	CD4_24hr_vs_8hr	NS
MA0624.1.NFATC1	7383	0.317764	0.279838	0.699087	0.631977	-0.105036	-0.865208	0.386925	MA0624.1	NFATC1	ENSG00000131196	Rel	0.49167	0.274793	CD4_24hr_vs_8hr	NS
MA1529.1.NHLH2	5687	-0.02849	-0.00511975	1.02826	1.12272	0.11783	0.323419	0.746378	MA1529.1	NHLH2	ENSG00000177551	bHLH	-1.36708	0.111012	CD4_24hr_vs_8hr	NS
MA1548.1.PLAGL2	7452	-0.200158	-0.197231	1.11696	1.20106	0.0870289	0.159147	0.873553	MA1548.1	PLAGL2	ENSG00000126003	C2H2 ZF	0.691262	0.19909	CD4_24hr_vs_8hr	NS
MA0610.1.DMRT3	3878	0.422529	0.378792	0.491165	0.424898	-0.110004	-0.891706	0.372551	MA0610.1	DMRT3	ENSG00000064218	DM	-1.0522	0.180801	CD4_24hr_vs_8hr	NS
MA0864.2.E2F2	780	0.349354	0.406503	1.27288	1.44263	0.226899	0.905129	0.365397	MA0864.2	E2F2	ENSG00000007968	E2F	3.95428	1.32227e-08	CD4_24hr_vs_8hr	expression
MA0853.1.Alx4	2124	0.566736	0.500579	0.623003	0.568961	-0.120199	-0.946081	0.344107	MA0853.1	ALX4	ENSG00000052850	Homeodomain	-1.14813	0.121159	CD4_24hr_vs_8hr	NS
MA0760.1.ERF	2426	0.103957	0.108148	1.01201	1.062	0.0541845	-0.0160244	0.987215	MA0760.1	ERF	ENSG00000105722	Ets	0.630238	0.176882	CD4_24hr_vs_8hr	NS
MA1599.1.ZNF682	7113	0.43567	0.504143	1.53812	1.71547	0.24582	1.00604	0.314395	MA1599.1	ZNF682	ENSG00000197124	C2H2 ZF	1.00614	0.0395468	CD4_24hr_vs_8hr	expression
MA1144.1.FOSL2::JUND	318	-0.0141708	-0.0417238	0.969018	1.25389	0.257317	1.06736	0.28581	MA1144.1	FOSL2	ENSG00000075426	bZIP	-1.99373	0.00019124	CD4_24hr_vs_8hr	expression
MA1144.1.FOSL2::JUND	318	-0.0141708	-0.0417238	0.969018	1.25389	0.257317	1.06736	0.28581	MA1144.1	JUND	ENSG00000130522	bZIP	1.12868	0.0227093	CD4_24hr_vs_8hr	expression
MA0634.1.ALX3	1306	0.628522	0.53075	0.524443	0.458245	-0.16397	-1.17953	0.238188	MA0634.1	ALX3	ENSG00000156150	Homeodomain	-1.1715	0.172793	CD4_24hr_vs_8hr	NS
MA1135.1.FOSB::JUNB	365	1.05216	1.17358	0.962421	1.10006	0.259064	1.07668	0.281624	MA1135.1	FOSB	ENSG00000125740	bZIP	-3.00399	1.5771e-06	CD4_24hr_vs_8hr	expression
MA1521.1.MAFA	5629	-0.00484091	-0.011351	0.859618	0.957924	0.0917958	0.184571	0.853565	MA1521.1	MAFA	ENSG00000182759	bZIP	-1.25805	0.134499	CD4_24hr_vs_8hr	NS
MA0648.1.GSC	2365	0.306891	0.277496	0.59758	0.592983	-0.0339918	-0.486303	0.626753	MA0648.1	GSC	ENSG00000133937	Homeodomain	-1.59785	0.0580523	CD4_24hr_vs_8hr	NS
MA0811.1.TFAP2B	1466	-0.256535	-0.303808	0.925662	0.99557	0.0226345	-0.184293	0.853784	MA0811.1	TFAP2B	ENSG00000008196	AP-2	-1.13548	0.140026	CD4_24hr_vs_8hr	NS
MA0464.2.BHLHE40	121	0.550124	0.71723	0.869697	0.984285	0.281694	1.19737	0.231162	MA0464.2	BHLHE40	ENSG00000134107	bHLH	1.18911	0.0210497	CD4_24hr_vs_8hr	expression
MA0747.1.SP8	5061	0.614557	0.699569	1.13281	1.25315	0.205348	0.790191	0.429416	MA0747.1	SP8	ENSG00000164651	C2H2 ZF	-1.48053	0.0970625	CD4_24hr_vs_8hr	NS
MA0653.1.IRF9	9864	0.570978	0.52692	0.887193	0.801616	-0.129635	-0.996404	0.319054	MA0653.1	IRF9	ENSG00000213928	IRF	-0.121985	0.725025	CD4_24hr_vs_8hr	NS
MA0667.1.MYF6	2487	-0.189672	-0.203044	0.625013	0.604119	-0.0342658	-0.487764	0.625717	MA0667.1	MYF6	ENSG00000111046	bHLH	-0.927126	0.244644	CD4_24hr_vs_8hr	NS
MA0511.2.RUNX2	5724	0.155525	0.159852	0.897344	0.903548	0.0105319	-0.248841	0.803484	MA0511.2	RUNX2	ENSG00000124813	Runt	-0.427126	0.216753	CD4_24hr_vs_8hr	NS
MA0068.2.PAX4	146	0.217348	0.169327	0.909653	0.970902	0.0132276	-0.234463	0.814625	MA0068.2	PAX4	ENSG00000106331	Homeodomain,Paired box	-0.626155	0.372033	CD4_24hr_vs_8hr	NS
MA0858.1.Rarb(var.2)	2958	0.285669	0.300332	0.666769	0.637665	-0.0144411	-0.382031	0.702438	MA0858.1	RARB	ENSG00000077092	Nuclear receptor	-1.0358	0.179336	CD4_24hr_vs_8hr	NS
MA0647.1.GRHL1	1400	-0.303424	-0.306094	0.678791	0.638224	-0.0432377	-0.535615	0.592225	MA0647.1	GRHL1	ENSG00000134317	Grainyhead	-0.156943	0.769816	CD4_24hr_vs_8hr	NS
MA1557.1.SMAD5	1967	0.230069	0.27699	0.736994	0.761386	0.0713133	0.0753302	0.939952	MA1557.1	SMAD5	ENSG00000113658	SMAD	0.586117	0.158715	CD4_24hr_vs_8hr	NS
MA1568.1.TCF21(var.2)	2597	0.459272	0.414875	0.673221	0.617966	-0.0996515	-0.836491	0.402879	MA1568.1	TCF21	ENSG00000118526	bHLH	-0.513592	0.478308	CD4_24hr_vs_8hr	NS
MA0831.2.TFE3	4883	1.18028	1.34278	1.25002	1.40396	0.316446	1.38272	0.166752	MA0831.2	TFE3	ENSG00000068323	bHLH	0.860147	0.0411788	CD4_24hr_vs_8hr	expression
MA1500.1.HOXB6	1672	0.490662	0.44203	0.541874	0.509761	-0.0807448	-0.735654	0.461941	MA1500.1	HOXB6	ENSG00000108511	Homeodomain	-0.877529	0.21461	CD4_24hr_vs_8hr	NS
MA0756.1.ONECUT2	2773	0.555997	0.499606	0.506929	0.449511	-0.113808	-0.911995	0.361771	MA0756.1	ONECUT2	ENSG00000119547	CUT,Homeodomain	-1.19092	0.103112	CD4_24hr_vs_8hr	NS
MA0689.1.TBX20	2977	0.525346	0.532142	0.719909	0.703291	-0.00982058	-0.357388	0.720801	MA0689.1	TBX20	ENSG00000164532	T-box	-1.05204	0.204137	CD4_24hr_vs_8hr	NS
MA1618.1.Ptf1a	6131	0.402273	0.414297	0.603854	0.582291	-0.00953951	-0.355889	0.721924	MA1618.1	PTF1A	ENSG00000168267	bHLH	-0.98541	0.200858	CD4_24hr_vs_8hr	NS
MA0903.1.HOXB3	435	0.741855	0.674495	0.679136	0.599751	-0.146746	-1.08766	0.276744	MA0903.1	HOXB3	ENSG00000120093	Homeodomain	-0.186333	0.688136	CD4_24hr_vs_8hr	NS
MA0769.2.TCF7	7146	-0.0302918	-0.0406886	0.644157	0.610926	-0.0436275	-0.537693	0.590789	MA0769.2	TCF7	ENSG00000081059	Sox	0.528971	0.294264	CD4_24hr_vs_8hr	NS
MA0838.1.CEBPG	300	0.390621	0.517891	0.717087	0.759476	0.169659	0.599845	0.54861	MA0838.1	CEBPG	ENSG00000153879	bZIP	-0.325485	0.420168	CD4_24hr_vs_8hr	NS
MA0807.1.TBX5	8461	-0.00148976	0.0277978	0.720672	0.728122	0.0367373	-0.109077	0.913141	MA0807.1	TBX5	ENSG00000089225	T-box	-1.24785	0.110629	CD4_24hr_vs_8hr	NS
MA1536.1.NR2C2(var.2)	5458	0.138075	0.139099	0.654169	0.660009	0.00686365	-0.268405	0.788388	MA1536.1	NR2C2	ENSG00000177463	Nuclear receptor	0.853929	0.0547785	CD4_24hr_vs_8hr	NS
MA1512.1.KLF11	3617	1.09108	1.23996	1.48495	1.65991	0.323838	1.42214	0.154985	MA1512.1	KLF11	ENSG00000172059	C2H2 ZF	0.962307	0.0271691	CD4_24hr_vs_8hr	expression
MA0006.1.Ahr::Arnt	6083	0.493197	0.599726	1.60814	1.82621	0.324597	1.42619	0.153814	MA0006.1	ARNT	ENSG00000143437	bHLH	1.36069	0.00228672	CD4_24hr_vs_8hr	expression
MA1647.1.PRDM4	9101	-0.152311	-0.12562	0.728685	0.682504	-0.0194903	-0.408961	0.682569	MA1647.1	PRDM4	ENSG00000110851	C2H2 ZF	0.310481	0.452665	CD4_24hr_vs_8hr	NS
MA1508.1.IKZF1	19095	0.658695	0.667112	0.797965	0.801581	0.0120335	-0.240832	0.809685	MA1508.1	IKZF1	ENSG00000185811	C2H2 ZF	-0.0760973	0.875342	CD4_24hr_vs_8hr	NS
MA1596.1.ZNF460	19961	0.633526	0.697253	1.39766	1.54927	0.215337	0.843466	0.398968	MA1596.1	ZNF460	ENSG00000197714	C2H2 ZF	-0.731175	0.126576	CD4_24hr_vs_8hr	NS
MA1145.1.FOSL2::JUND(var.2)	3803	1.02287	1.16802	1.42122	1.60362	0.327553	1.44195	0.149315	MA1145.1	FOSL2	ENSG00000075426	bZIP	-1.99373	0.00019124	CD4_24hr_vs_8hr	expression
MA0874.1.Arx	2389	0.528221	0.46485	0.558804	0.510481	-0.111695	-0.900722	0.367736	MA0874.1	ARX	ENSG00000004848	Homeodomain	-0.889774	0.235755	CD4_24hr_vs_8hr	NS
MA1145.1.FOSL2::JUND(var.2)	3803	1.02287	1.16802	1.42122	1.60362	0.327553	1.44195	0.149315	MA1145.1	JUND	ENSG00000130522	bZIP	1.12868	0.0227093	CD4_24hr_vs_8hr	expression
MA0783.1.PKNOX2	1990	0.190392	0.17159	0.651056	0.628965	-0.0408928	-0.523109	0.600899	MA0783.1	PKNOX2	ENSG00000165495	Homeodomain	-1.10894	0.0994201	CD4_24hr_vs_8hr	NS
MA1484.1.ETS2	5344	-0.969732	-1.18581	1.63489	1.84709	-0.00387388	-0.325672	0.744672	MA1484.1	ETS2	ENSG00000157557	Ets	0.197375	0.633525	CD4_24hr_vs_8hr	NS
MA1641.1.MYF5	7811	-0.605604	-0.580217	0.76811	0.770404	0.0276806	-0.15738	0.874946	MA1641.1	MYF5	ENSG00000111049	bHLH	-0.445124	0.60299	CD4_24hr_vs_8hr	NS
MA1103.2.FOXK2	5660	0.413623	0.419756	0.571564	0.580287	0.0148554	-0.225781	0.821371	MA1103.2	FOXK2	ENSG00000141568	Forkhead	0.272246	0.542778	CD4_24hr_vs_8hr	NS
MA1478.1.DMRTA2	1452	-0.0661148	-0.0575383	0.514604	0.4594	-0.0466275	-0.553694	0.579788	MA1478.1	DMRTA2	ENSG00000142700	DM	-1.2179	0.123567	CD4_24hr_vs_8hr	NS
MA1640.1.MEIS2(var.2)	4760	0.62134	0.585103	0.5587	0.514652	-0.0802856	-0.733205	0.463433	MA1640.1	MEIS2	ENSG00000134138	Homeodomain	-1.1104	0.0971392	CD4_24hr_vs_8hr	NS
MA0744.2.SCRT2	4800	0.341412	0.345492	0.681124	0.68423	0.00718582	-0.266686	0.789711	MA0744.2	SCRT2	ENSG00000215397	C2H2 ZF	-0.850728	0.236411	CD4_24hr_vs_8hr	NS
MA0722.1.VAX1	2336	0.698962	0.618274	0.52108	0.460337	-0.141431	-1.05932	0.289455	MA0722.1	VAX1	ENSG00000148704	Homeodomain	-1.06939	0.153369	CD4_24hr_vs_8hr	NS
MA0148.4.FOXA1	6655	0.377213	0.357234	0.528402	0.515197	-0.0331838	-0.481993	0.629811	MA0148.4	FOXA1	ENSG00000129514	Forkhead	-1.17875	0.140416	CD4_24hr_vs_8hr	NS
MA0913.2.HOXD9	4730	0.345916	0.317635	0.533985	0.484091	-0.0781756	-0.721952	0.470324	MA0913.2	HOXD9	ENSG00000128709	Homeodomain	-1.02123	0.175585	CD4_24hr_vs_8hr	NS
MA0657.1.KLF13	3434	1.04201	1.17382	1.66006	1.87247	0.344226	1.53088	0.125799	MA0657.1	KLF13	ENSG00000169926	C2H2 ZF	1.44525	0.00357782	CD4_24hr_vs_8hr	expression
MA1130.1.FOSL2::JUN	17633	0.267666	0.254355	0.897195	0.950466	0.0399593	-0.0918931	0.926783	MA1130.1	JUN	ENSG00000177606	bZIP	-0.629717	0.157553	CD4_24hr_vs_8hr	NS
MA0754.1.CUX1	1164	0.632726	0.5913	0.535974	0.501452	-0.0759476	-0.710069	0.477661	MA0754.1	CUX1	ENSG00000257923	CUT,Homeodomain	-0.252576	0.523482	CD4_24hr_vs_8hr	NS
MA0080.5.SPI1	19423	0.848143	0.842405	0.81399	0.797634	-0.0220947	-0.422851	0.672404	MA0080.5	SPI1	ENSG00000066336	Ets	-0.918723	0.155281	CD4_24hr_vs_8hr	NS
MA0644.1.ESX1	3000	0.745189	0.700078	0.668954	0.647266	-0.0667996	-0.661279	0.508433	MA0644.1	ESX1	ENSG00000123576	Homeodomain	-1.148	0.192534	CD4_24hr_vs_8hr	NS
MA0103.3.ZEB1	5107	0.297917	0.327639	0.823297	0.874516	0.0809407	0.126677	0.899196	MA0103.3	ZEB1	ENSG00000148516	C2H2 ZF,Homeodomain	-0.416114	0.314899	CD4_24hr_vs_8hr	NS
MA0623.2.NEUROG1	809	0.69181	0.670645	0.543129	0.524057	-0.0402362	-0.519607	0.603338	MA0623.2	NEUROG1	ENSG00000181965	bHLH	-0.96861	0.220828	CD4_24hr_vs_8hr	NS
MA0605.2.ATF3	946	0.363724	0.360459	0.694165	0.684322	-0.0131087	-0.374925	0.707716	MA0605.2	ATF3	ENSG00000162772	bZIP	-0.843188	0.0548005	CD4_24hr_vs_8hr	NS
MA1487.1.FOXE1	5753	0.535612	0.543147	0.562668	0.560204	0.0050711	-0.277965	0.781039	MA1487.1	FOXE1	ENSG00000178919	Forkhead	-0.782018	0.278847	CD4_24hr_vs_8hr	NS
MA1117.1.RELB	4578	-0.211431	-0.178305	0.863073	0.852724	0.0227776	-0.18353	0.854383	MA1117.1	RELB	ENSG00000104856	Rel	-0.578148	0.206578	CD4_24hr_vs_8hr	NS
MA0715.1.PROP1	6767	0.565018	0.488595	0.463415	0.39951	-0.140327	-1.05343	0.292145	MA0715.1	PROP1	ENSG00000175325	Homeodomain	-0.879123	0.249125	CD4_24hr_vs_8hr	NS
MA0780.1.PAX3	3129	0.522668	0.4861	0.492318	0.448565	-0.0803206	-0.733392	0.463319	MA0780.1	PAX3	ENSG00000135903	Homeodomain,Paired box	-1.08318	0.145055	CD4_24hr_vs_8hr	NS
MA0527.1.ZBTB33	2323	0.35884	0.40877	2.38565	2.68436	0.348635	1.5544	0.12009	MA0527.1	ZBTB33	ENSG00000177485	C2H2 ZF	0.307141	0.428455	CD4_24hr_vs_8hr	NS
MA1556.1.RXRG(var.2)	2065	0.331427	0.350568	1.20344	1.35256	0.168265	0.59241	0.553576	MA1556.1	RXRG	ENSG00000143171	Nuclear receptor	-1.47436	0.109941	CD4_24hr_vs_8hr	NS
MA0738.1.HIC2	5687	0.177285	0.201747	0.789686	0.828116	0.0628918	0.0304152	0.975736	MA0738.1	HIC2	ENSG00000169635	C2H2 ZF	-0.372853	0.323136	CD4_24hr_vs_8hr	NS
MA0679.2.ONECUT1	4638	0.536478	0.480696	0.497244	0.4445	-0.108526	-0.883821	0.376793	MA0679.2	ONECUT1	ENSG00000169856	CUT,Homeodomain	-0.790191	0.285482	CD4_24hr_vs_8hr	NS
MA0703.2.LMX1B	2549	0.580391	0.515178	0.532897	0.472575	-0.125533	-0.97453	0.329794	MA0703.2	LMX1B	ENSG00000136944	Homeodomain	-1.15035	0.130395	CD4_24hr_vs_8hr	NS
MA0748.2.YY2	3408	0.191511	0.209016	2.1574	2.5027	0.36281	1.62999	0.103103	MA0748.2	YY2	ENSG00000230797	C2H2 ZF	-0.0663479	0.925567	CD4_24hr_vs_8hr	NS
MA1538.1.NR2F1(var.3)	779	-0.343471	-0.364726	0.87121	0.906002	0.0135372	-0.232812	0.815907	MA1538.1	NR2F1	ENSG00000175745	Nuclear receptor	-0.891309	0.213509	CD4_24hr_vs_8hr	NS
MA0802.1.TBR1	5847	0.0933806	0.0993955	0.661374	0.628694	-0.0266653	-0.447228	0.654711	MA0802.1	TBR1	ENSG00000136535	T-box	-1.30742	0.0728146	CD4_24hr_vs_8hr	NS
MA1133.1.JUN::JUNB(var.2)	1002	0.206891	0.24362	1.00565	1.10806	0.13914	0.437074	0.662058	MA1133.1	JUN	ENSG00000177606	bZIP	-0.629717	0.157553	CD4_24hr_vs_8hr	NS
MA1133.1.JUN::JUNB(var.2)	1002	0.206891	0.24362	1.00565	1.10806	0.13914	0.437074	0.662058	MA1133.1	JUNB	ENSG00000171223	bZIP	0.309821	0.471687	CD4_24hr_vs_8hr	NS
MA0141.3.ESRRB	2422	-0.0485325	-0.0295393	0.552564	0.532316	-0.00125527	-0.311706	0.755264	MA0141.3	ESRRB	ENSG00000119715	Nuclear receptor	-0.464419	0.450648	CD4_24hr_vs_8hr	NS
MA1650.1.ZBTB14	7456	0.277762	0.292688	2.35821	2.70606	0.362781	1.62984	0.103136	MA1650.1	ZBTB14	ENSG00000198081	C2H2 ZF	1.29658	0.00208047	CD4_24hr_vs_8hr	expression
MA1151.1.RORC	3454	0.150115	0.132621	0.574569	0.543565	-0.0484982	-0.563671	0.572978	MA1151.1	RORC	ENSG00000143365	Nuclear receptor	-1.05522	0.104364	CD4_24hr_vs_8hr	NS
MA0077.1.SOX9	4616	0.524247	0.478993	0.583762	0.54253	-0.0864871	-0.766281	0.443509	MA0077.1	SOX9	ENSG00000125398	Sox	-1.21122	0.139356	CD4_24hr_vs_8hr	NS
MA0714.1.PITX3	2779	0.396222	0.354621	0.569393	0.553056	-0.0579381	-0.614017	0.539204	MA0714.1	PITX3	ENSG00000107859	Homeodomain	-1.38445	0.114136	CD4_24hr_vs_8hr	NS
MA0834.1.ATF7	2946	1.00802	1.16021	1.53382	1.76159	0.379967	1.7215	0.0851603	MA0834.1	ATF7	ENSG00000170653	bZIP,C2H2 ZF	0.867937	0.0459837	CD4_24hr_vs_8hr	expression
MA0832.1.Tcf21	4212	-0.112578	-0.0980671	0.685037	0.666517	-0.00400869	-0.326391	0.744128	MA0832.1	TCF21	ENSG00000118526	bHLH	-0.513592	0.478308	CD4_24hr_vs_8hr	NS
MA0698.1.ZBTB18	7025	0.0978739	0.101019	0.605946	0.591161	-0.0116401	-0.367092	0.71355	MA0698.1	ZBTB18	ENSG00000179456	C2H2 ZF	-0.758032	0.105666	CD4_24hr_vs_8hr	NS
MA0840.1.Creb5	157	0.46961	0.683525	1.0489	1.21613	0.381139	1.72775	0.0840334	MA0840.1	CREB5	ENSG00000146592	bZIP	-1.84938	0.000683917	CD4_24hr_vs_8hr	expression
MA0767.1.GCM2	2754	0.115204	0.147354	0.946013	1.01987	0.106005	0.260353	0.794591	MA0767.1	GCM2	ENSG00000124827	GCM	-0.995531	0.223355	CD4_24hr_vs_8hr	NS
MA0618.1.LBX1	482	0.846774	0.797251	0.636339	0.585825	-0.100036	-0.838544	0.401725	MA0618.1	LBX1	ENSG00000138136	Homeodomain	-0.756195	0.28623	CD4_24hr_vs_8hr	NS
MA1541.1.NR6A1	3558	0.232624	0.218129	0.596366	0.569947	-0.0409144	-0.523223	0.600819	MA1541.1	NR6A1	ENSG00000148200	Nuclear receptor	-0.21701	0.603703	CD4_24hr_vs_8hr	NS
MA0909.2.HOXD13	2233	0.357478	0.363484	0.773266	0.798752	0.0314919	-0.137053	0.890989	MA0909.2	HOXD13	ENSG00000128714	Homeodomain	-1.73583	0.0578616	CD4_24hr_vs_8hr	NS
MA0870.1.Sox1	2378	0.0840232	0.0711697	0.59394	0.565557	-0.0412362	-0.52494	0.599625	MA0870.1	SOX1	ENSG00000182968	Sox	-0.716893	0.289302	CD4_24hr_vs_8hr	NS
MA0771.1.HSF4	1173	0.148538	0.179846	0.706082	0.705602	0.030828	-0.140594	0.888191	MA0771.1	HSF4	ENSG00000102878	HSF	-0.165731	0.796706	CD4_24hr_vs_8hr	NS
MA0004.1.Arnt	9700	0.485015	0.622296	1.46546	1.7299	0.401713	1.83748	0.066139	MA0004.1	ARNT	ENSG00000143437	bHLH	1.36069	0.00228672	CD4_24hr_vs_8hr	expression
MA1135.1.FOSB::JUNB	365	1.05216	1.17358	0.962421	1.10006	0.259064	1.07668	0.281624	MA1135.1	JUNB	ENSG00000171223	bZIP	0.309821	0.471687	CD4_24hr_vs_8hr	NS
MA0074.1.RXRA::VDR	1885	0.134741	0.114387	0.719816	0.735572	-0.00459863	-0.329538	0.741749	MA0074.1	RXRA	ENSG00000186350	Nuclear receptor	0.014903	0.967727	CD4_24hr_vs_8hr	NS
MA1122.1.TFDP1	7352	0.761903	0.872459	2.46858	2.76306	0.405028	1.85516	0.0635737	MA1122.1	TFDP1	ENSG00000198176	E2F	2.48081	1.42277e-05	CD4_24hr_vs_8hr	expression
MA1132.1.JUN::JUNB	1867	0.606068	0.72406	1.01987	1.12233	0.220451	0.870737	0.383898	MA1132.1	JUN	ENSG00000177606	bZIP	-0.629717	0.157553	CD4_24hr_vs_8hr	NS
MA1132.1.JUN::JUNB	1867	0.606068	0.72406	1.01987	1.12233	0.220451	0.870737	0.383898	MA1132.1	JUNB	ENSG00000171223	bZIP	0.309821	0.471687	CD4_24hr_vs_8hr	NS
MA0680.1.PAX7	523	0.588893	0.549894	0.511729	0.468266	-0.0824617	-0.744812	0.456386	MA0680.1	PAX7	ENSG00000009709	Homeodomain,Paired box	-1.44934	0.0581479	CD4_24hr_vs_8hr	NS
MA0596.1.SREBF2	6120	0.66536	0.692505	0.706554	0.725664	0.0462552	-0.0583142	0.953498	MA0596.1	SREBF2	ENSG00000198911	bHLH	0.431076	0.329797	CD4_24hr_vs_8hr	NS
MA0521.1.Tcf12	11926	-0.4798	-0.470533	0.82531	0.844578	0.0285355	-0.15282	0.87854	MA0521.1	TCF12	ENSG00000140262	bHLH	0.715017	0.114532	CD4_24hr_vs_8hr	NS
MA1619.1.Ptf1a(var.2)	427	-0.397372	-0.419189	1.05476	1.16522	0.0886369	0.167723	0.866801	MA1619.1	PTF1A	ENSG00000168267	bHLH	-0.98541	0.200858	CD4_24hr_vs_8hr	NS
MA0817.1.BHLHE23	3459	0.612553	0.551532	0.493251	0.428818	-0.125453	-0.974101	0.330007	MA0817.1	BHLHE23	ENSG00000125533	bHLH	-1.43658	0.147981	CD4_24hr_vs_8hr	NS
MA0002.2.RUNX1	12827	0.31693	0.338733	0.748732	0.740827	0.013898	-0.230888	0.817402	MA0002.2	RUNX1	ENSG00000159216	Runt	-0.223943	0.608779	CD4_24hr_vs_8hr	NS
MA1127.1.FOSB::JUN	4652	1.37453	1.59064	1.49382	1.68769	0.409984	1.88159	0.0598915	MA1127.1	FOSB	ENSG00000125740	bZIP	-3.00399	1.5771e-06	CD4_24hr_vs_8hr	expression
MA0518.1.Stat4	6932	0.135237	0.133757	0.779652	0.768336	-0.0127949	-0.373251	0.708961	MA0518.1	STAT4	ENSG00000138378	STAT	0.413323	0.343398	CD4_24hr_vs_8hr	NS
MA0489.1.JUN(var.2)	18757	0.424709	0.444496	0.875782	0.929537	0.0735416	0.0872144	0.930501	MA0489.1	JUN	ENSG00000177606	bZIP	-0.629717	0.157553	CD4_24hr_vs_8hr	NS
MA0462.2.BATF::JUN	192	0.716492	0.679429	0.802027	0.800651	-0.0384388	-0.51002	0.610037	MA0462.2	BATF	ENSG00000156127	bZIP	0.353427	0.408047	CD4_24hr_vs_8hr	NS
MA0462.2.BATF::JUN	192	0.716492	0.679429	0.802027	0.800651	-0.0384388	-0.51002	0.610037	MA0462.2	JUN	ENSG00000177606	bZIP	-0.629717	0.157553	CD4_24hr_vs_8hr	NS
MA0018.4.CREB1	2939	0.579634	0.581457	0.6977	0.689324	-0.00655383	-0.339965	0.733883	MA0018.4	CREB1	ENSG00000118260	bZIP	0.31479	0.441432	CD4_24hr_vs_8hr	NS
MA0136.2.ELF5	5163	0.255688	0.246396	1.13091	1.20292	0.0627234	0.0295167	0.976452	MA0136.2	ELF5	ENSG00000135374	Ets	-1.07388	0.15937	CD4_24hr_vs_8hr	NS
MA0827.1.OLIG3	142	0.33556	0.353228	0.499783	0.467283	-0.0148328	-0.38412	0.700889	MA0827.1	OLIG3	ENSG00000177468	bHLH	-0.916686	0.245387	CD4_24hr_vs_8hr	NS
MA1110.1.NR1H4	3269	-0.0342327	-0.0446704	0.554324	0.513701	-0.0510604	-0.577336	0.563712	MA1110.1	NR1H4	ENSG00000012504	Nuclear receptor	-1.02715	0.214233	CD4_24hr_vs_8hr	NS
MA0156.2.FEV	4324	-0.880072	-1.05162	1.78676	2.01745	0.0591426	0.0104191	0.991687	MA0156.2	FEV	ENSG00000163497	Ets	-1.40087	0.0868904	CD4_24hr_vs_8hr	NS
MA0755.1.CUX2	144	0.555641	0.51685	0.548793	0.533277	-0.0543067	-0.59465	0.552077	MA0755.1	CUX2	ENSG00000111249	CUT,Homeodomain	-1.01323	0.101627	CD4_24hr_vs_8hr	NS
MA0863.1.MTF1	2686	0.133667	0.145797	0.947717	1.02381	0.0882246	0.165525	0.868531	MA0863.1	MTF1	ENSG00000188786	C2H2 ZF	0.168554	0.703871	CD4_24hr_vs_8hr	NS
MA0797.1.TGIF2	287	0.278792	0.276215	0.742543	0.692033	-0.0530873	-0.588146	0.556434	MA0797.1	TGIF2	ENSG00000118707	Homeodomain	0.537384	0.207694	CD4_24hr_vs_8hr	NS
MA0678.1.OLIG2	1228	0.339445	0.276087	0.489029	0.436099	-0.116289	-0.925223	0.35485	MA0678.1	OLIG2	ENSG00000205927	bHLH	-0.758436	0.281507	CD4_24hr_vs_8hr	NS
MA0259.1.ARNT::HIF1A	1790	0.80586	0.982725	1.593	1.82966	0.413523	1.90047	0.0573719	MA0259.1	ARNT	ENSG00000143437	bHLH	1.36069	0.00228672	CD4_24hr_vs_8hr	expression
MA1642.1.NEUROG2(var.2)	5430	0.550242	0.556855	0.647931	0.630587	-0.0107307	-0.362242	0.717171	MA1642.1	NEUROG2	ENSG00000178403	bHLH	-0.871061	0.220242	CD4_24hr_vs_8hr	NS
MA0877.2.BARHL1	666	0.468268	0.548291	1.0067	1.11963	0.192955	0.724093	0.469009	MA0877.2	BARHL1	ENSG00000125492	Homeodomain	-1.13463	0.139312	CD4_24hr_vs_8hr	NS
MA0803.1.TBX15	221	0.666409	0.866814	1.24136	1.42971	0.388755	1.76837	0.0769994	MA0803.1	TBX15	ENSG00000092607	T-box	-1.22576	0.125433	CD4_24hr_vs_8hr	NS
MA0592.3.ESRRA	4345	0.0817115	0.0806464	0.620241	0.606689	-0.0146173	-0.382971	0.701741	MA0592.3	ESRRA	ENSG00000173153	Nuclear receptor	0.392107	0.349426	CD4_24hr_vs_8hr	NS
MA1562.1.SOX14	2906	0.344051	0.36285	0.616896	0.593075	-0.00502247	-0.331798	0.740042	MA1562.1	SOX14	ENSG00000168875	Sox	-1.78708	0.0843927	CD4_24hr_vs_8hr	NS
MA0638.1.CREB3	681	0.373621	0.443211	2.19988	2.55102	0.420733	1.93892	0.0525112	MA0638.1	CREB3	ENSG00000107175	bZIP	1.52711	0.000167851	CD4_24hr_vs_8hr	expression
MA1131.1.FOSL2::JUN(var.2)	1583	0.888607	0.947561	0.929493	0.99994	0.129401	0.385135	0.700138	MA1131.1	JUN	ENSG00000177606	bZIP	-0.629717	0.157553	CD4_24hr_vs_8hr	NS
MA0871.2.TFEC	3562	1.15356	1.35075	1.48899	1.7182	0.426411	1.9692	0.0489296	MA0871.2	TFEC	ENSG00000105967	bHLH	-1.55204	0.0361462	CD4_24hr_vs_8hr	both
MA0495.3.MAFF	4991	0.114522	0.106284	0.534856	0.499186	-0.0439079	-0.539189	0.589756	MA0495.3	MAFF	ENSG00000185022	bZIP	-0.356682	0.351429	CD4_24hr_vs_8hr	NS
MA1111.1.NR2F2	5132	0.197627	0.200246	0.637488	0.635751	0.000880629	-0.300314	0.763937	MA1111.1	NR2F2	ENSG00000185551	Nuclear receptor	-1.17226	0.125813	CD4_24hr_vs_8hr	NS
MA1485.1.FERD3L	5453	-0.0084704	0.00962707	1.11195	1.17225	0.0784013	0.113133	0.909925	MA1485.1	FERD3L	ENSG00000146618	bHLH	-0.646007	0.480933	CD4_24hr_vs_8hr	NS
MA1515.1.KLF2	4288	1.33115	1.52466	1.82221	2.05574	0.42704	1.97256	0.0485459	MA1515.1	KLF2	ENSG00000127528	C2H2 ZF	-3.69614	1.97004e-06	CD4_24hr_vs_8hr	both
MA0006.1.Ahr::Arnt	6083	0.493197	0.599726	1.60814	1.82621	0.324597	1.42619	0.153814	MA0006.1	AHR	ENSG00000106546	bHLH	-0.437537	0.351077	CD4_24hr_vs_8hr	NS
MA0637.1.CENPB	807	1.4057	1.60261	1.75929	1.99586	0.433472	2.00686	0.0447644	MA0637.1	CENPB	ENSG00000125817	CENPB	1.12949	0.0234057	CD4_24hr_vs_8hr	both
MA0599.1.KLF5	32954	1.26617	1.44673	1.89351	2.14837	0.435424	2.01727	0.0436672	MA0599.1	KLF5	ENSG00000102554	C2H2 ZF	-0.685424	0.125727	CD4_24hr_vs_8hr	footprint
MA1153.1.Smad4	5178	0.142529	0.134619	0.662973	0.64547	-0.0254131	-0.440549	0.659539	MA1153.1	SMAD4	ENSG00000141646	SMAD	0.164844	0.682637	CD4_24hr_vs_8hr	NS
MA0656.1.JDP2(var.2)	4629	0.852942	0.969182	1.44571	1.62358	0.294111	1.2636	0.206375	MA0656.1	JDP2	ENSG00000140044	bZIP	-0.702683	0.19909	CD4_24hr_vs_8hr	NS
MA1106.1.HIF1A	1531	0.999933	1.14064	1.71584	2.01202	0.436885	2.02507	0.0428604	MA1106.1	HIF1A	ENSG00000100644	bHLH	-0.212639	0.644005	CD4_24hr_vs_8hr	footprint
MA1517.1.KLF6	2064	1.16082	1.35169	1.78677	2.03486	0.438965	2.03616	0.0417343	MA1517.1	KLF6	ENSG00000067082	C2H2 ZF	-0.315339	0.438186	CD4_24hr_vs_8hr	footprint
MA1593.1.ZNF317	8641	-0.0605539	-0.0612191	0.623831	0.597852	-0.0266448	-0.447118	0.65479	MA1593.1	ZNF317	ENSG00000130803	C2H2 ZF	0.29305	0.464937	CD4_24hr_vs_8hr	NS
MA1520.1.MAF	1072	0.288322	0.275587	0.552268	0.50308	-0.0619229	-0.63527	0.525252	MA1520.1	MAF	ENSG00000178573	bZIP	-0.845168	0.0889048	CD4_24hr_vs_8hr	NS
MA0036.3.GATA2	3358	0.485802	0.436858	0.586635	0.546574	-0.0890043	-0.779705	0.435564	MA0036.3	GATA2	ENSG00000179348	GATA	-0.756589	0.182541	CD4_24hr_vs_8hr	NS
MA1108.2.MXI1	5811	0.430593	0.41437	0.535013	0.513692	-0.0375436	-0.505246	0.613386	MA1108.2	MXI1	ENSG00000119950	bHLH	-0.494764	0.243572	CD4_24hr_vs_8hr	NS
MA1578.1.VEZF1	5679	1.41119	1.64417	1.37956	1.59622	0.449633	2.09305	0.0363444	MA1578.1	VEZF1	ENSG00000136451	C2H2 ZF	-0.0164937	0.968574	CD4_24hr_vs_8hr	footprint
MA0494.1.Nr1h3::Rxra	3361	0.201051	0.187742	0.599584	0.569772	-0.0431209	-0.534991	0.592656	MA0494.1	RXRA	ENSG00000186350	Nuclear receptor	0.014903	0.967727	CD4_24hr_vs_8hr	NS
MA0007.3.Ar	687	0.116349	0.0860343	0.951328	0.950692	-0.030951	-0.470085	0.638294	MA0007.3	AR	ENSG00000169083	Nuclear receptor	-1.06391	0.121104	CD4_24hr_vs_8hr	NS
MA1589.1.ZNF140	3577	0.42529	0.411558	0.717043	0.707868	-0.0229079	-0.427188	0.669242	MA1589.1	ZNF140	ENSG00000196387	C2H2 ZF	-0.576279	0.145456	CD4_24hr_vs_8hr	NS
MA0759.1.ELK3	568	-0.522014	-0.592455	2.95812	3.50419	0.475631	2.23171	0.0256339	MA0759.1	ELK3	ENSG00000111145	Ets	-0.563857	0.205642	CD4_24hr_vs_8hr	footprint
MA0099.3.FOS::JUN	19933	0.353114	0.365502	0.911893	0.965673	0.0661682	0.0478891	0.961805	MA0099.3	JUN	ENSG00000177606	bZIP	-0.629717	0.157553	CD4_24hr_vs_8hr	NS
MA0816.1.Ascl2	1838	-0.966504	-0.991441	0.768125	0.78478	-0.0082823	-0.349184	0.726951	MA0816.1	ASCL2	ENSG00000183734	bHLH	-0.702039	0.272803	CD4_24hr_vs_8hr	NS
MA1464.1.ARNT2	64	0.780274	0.995042	1.17395	1.44625	0.487063	2.29268	0.0218663	MA1464.1	ARNT2	ENSG00000172379	bHLH	-1.28303	0.0506783	CD4_24hr_vs_8hr	footprint
MA0154.4.EBF1	6637	0.158936	0.164094	0.862629	0.905192	0.0477199	-0.0505027	0.959722	MA0154.4	EBF1	ENSG00000164330	EBF1	-1.1135	0.127172	CD4_24hr_vs_8hr	NS
MA0774.1.MEIS2	923	0.423289	0.501037	0.661799	0.671071	0.0870196	0.159098	0.873592	MA0774.1	MEIS2	ENSG00000134138	Homeodomain	-1.1104	0.0971392	CD4_24hr_vs_8hr	NS
MA1513.1.KLF15	15288	1.3757	1.55594	2.44474	2.75333	0.488825	2.30208	0.0213305	MA1513.1	KLF15	ENSG00000163884	C2H2 ZF	0.650309	0.28345	CD4_24hr_vs_8hr	footprint
MA0810.1.TFAP2A(var.2)	8458	-0.214564	-0.257408	1.5017	1.64664	0.102094	0.239497	0.81072	MA0810.1	TFAP2A	ENSG00000137203	AP-2	-1.03862	0.0974926	CD4_24hr_vs_8hr	NS
MA0789.1.POU3F4	1169	0.531531	0.435268	0.478077	0.401684	-0.172655	-1.22585	0.220256	MA0789.1	POU3F4	ENSG00000196767	Homeodomain,POU	-1.03686	0.259289	CD4_24hr_vs_8hr	NS
MA0501.1.MAF::NFE2	8393	0.359228	0.360907	0.731218	0.771409	0.0418695	-0.0817049	0.934881	MA0501.1	MAF	ENSG00000178573	bZIP	-0.845168	0.0889048	CD4_24hr_vs_8hr	NS
MA0501.1.MAF::NFE2	8393	0.359228	0.360907	0.731218	0.771409	0.0418695	-0.0817049	0.934881	MA0501.1	NFE2	ENSG00000123405	bZIP	-0.936679	0.175445	CD4_24hr_vs_8hr	NS
MA1630.1.Znf281	14127	1.40425	1.58454	1.29932	1.45581	0.336769	1.49111	0.135934	MA1630.1	ZNF281	ENSG00000162702	C2H2 ZF	-0.192395	0.634333	CD4_24hr_vs_8hr	NS
MA1530.1.NKX6-3	4461	0.606051	0.557625	0.544112	0.493777	-0.0987614	-0.831744	0.405553	MA1530.1	NKX6-3	ENSG00000165066	Homeodomain	-1.5201	0.0644155	CD4_24hr_vs_8hr	NS
MA0503.1.Nkx2-5(var.2)	6995	0.05129	0.0766893	0.682039	0.672872	0.0162322	-0.218439	0.827087	MA0503.1	NKX2-5	ENSG00000183072	Homeodomain	-0.645532	0.470788	CD4_24hr_vs_8hr	NS
MA1628.1.Zic1::Zic2	11668	0.0717119	0.0836282	0.954633	0.994954	0.0522376	-0.0264078	0.978932	MA1628.1	ZIC1	ENSG00000152977	C2H2 ZF	-0.888121	0.191315	CD4_24hr_vs_8hr	NS
MA1628.1.Zic1::Zic2	11668	0.0717119	0.0836282	0.954633	0.994954	0.0522376	-0.0264078	0.978932	MA1628.1	ZIC2	ENSG00000043355	C2H2 ZF	-1.12377	0.167825	CD4_24hr_vs_8hr	NS
MA1657.1.ZNF652	4850	0.258091	0.251413	0.615212	0.578545	-0.0433448	-0.536186	0.59183	MA1657.1	ZNF652	ENSG00000198740	C2H2 ZF	-0.322636	0.401516	CD4_24hr_vs_8hr	NS
MA0852.2.FOXK1	4879	0.423987	0.430231	0.608889	0.618901	0.0162565	-0.218309	0.827188	MA0852.2	FOXK1	ENSG00000164916	Forkhead	0.239016	0.585892	CD4_24hr_vs_8hr	NS
MA0887.1.EVX1	1085	0.624231	0.609781	0.669291	0.647483	-0.0362585	-0.498392	0.618208	MA0887.1	EVX1	ENSG00000106038	Homeodomain	-0.92265	0.225668	CD4_24hr_vs_8hr	NS
MA1608.1.Isl1	2952	0.538145	0.509931	0.571833	0.531485	-0.0685622	-0.67068	0.502425	MA1608.1	ISL1	ENSG00000016082	Homeodomain	-1.20428	0.135916	CD4_24hr_vs_8hr	NS
MA0608.1.Creb3l2	3037	0.88122	1.08928	1.71682	2.00453	0.495775	2.33915	0.0193277	MA0608.1	CREB3L2	ENSG00000182158	bZIP	0.875447	0.0606693	CD4_24hr_vs_8hr	footprint
MA0479.1.FOXH1	4545	0.538258	0.545342	0.584004	0.566874	-0.0100464	-0.358592	0.7199	MA0479.1	FOXH1	ENSG00000160973	Forkhead	-0.894362	0.228302	CD4_24hr_vs_8hr	NS
MA0775.1.MEIS3	6834	0.219131	0.219923	0.834286	0.842067	0.00857329	-0.259287	0.795414	MA0775.1	MEIS3	ENSG00000105419	Homeodomain	-1.09483	0.122093	CD4_24hr_vs_8hr	NS
MA0721.1.UNCX	3833	0.778813	0.679535	0.533366	0.470704	-0.16194	-1.1687	0.242525	MA0721.1	UNCX	ENSG00000164853	Homeodomain	-1.13489	0.142763	CD4_24hr_vs_8hr	NS
MA1473.1.CDX4	1274	0.358113	0.352049	0.549939	0.509945	-0.0460573	-0.550653	0.581872	MA1473.1	CDX4	ENSG00000131264	Homeodomain	-1.31648	0.156932	CD4_24hr_vs_8hr	NS
MA0828.1.SREBF2(var.2)	928	0.519025	0.573638	0.725587	0.748216	0.0772418	0.106949	0.914829	MA0828.1	SREBF2	ENSG00000198911	bHLH	0.431076	0.329797	CD4_24hr_vs_8hr	NS
MA0878.2.CDX1	260	0.46973	0.477979	0.491159	0.454114	-0.028797	-0.458597	0.646524	MA0878.2	CDX1	ENSG00000113722	Homeodomain	-1.2111	0.142278	CD4_24hr_vs_8hr	NS
MA0822.1.HES7	825	0.778509	0.947746	1.97254	2.30204	0.498739	2.35496	0.0185248	MA0822.1	HES7	ENSG00000179111	bHLH	-0.00168283	0.997742	CD4_24hr_vs_8hr	footprint
MA0733.1.EGR4	6567	1.28971	1.51499	1.83326	2.11304	0.505052	2.38862	0.0169116	MA0733.1	EGR4	ENSG00000135625	C2H2 ZF	-0.754465	0.201886	CD4_24hr_vs_8hr	footprint
MA0891.1.GSC2	548	0.393762	0.400895	0.562919	0.524551	-0.0312357	-0.471603	0.63721	MA0891.1	GSC2	ENSG00000063515	Homeodomain	-0.986732	0.224622	CD4_24hr_vs_8hr	NS
MA1120.1.SOX13	860	0.0798195	0.0814688	0.668551	0.623447	-0.0434548	-0.536772	0.591425	MA1120.1	SOX13	ENSG00000143842	Sox	-1.01217	0.113473	CD4_24hr_vs_8hr	NS
MA0046.2.HNF1A	4778	0.56099	0.5201	0.524416	0.487883	-0.0774222	-0.717934	0.472798	MA0046.2	HNF1A	ENSG00000135100	Homeodomain	-1.05628	0.162122	CD4_24hr_vs_8hr	NS
MA1535.1.NR2C1	4911	-0.0441446	-0.0288958	0.768245	0.789247	0.0362513	-0.111669	0.911086	MA1535.1	NR2C1	ENSG00000120798	Nuclear receptor	0.34263	0.316693	CD4_24hr_vs_8hr	NS
MA1683.1.FOXA3	466	0.325885	0.317962	0.518184	0.469216	-0.0568908	-0.608432	0.542901	MA1683.1	FOXA3	ENSG00000170608	Forkhead	0.645671	0.307953	CD4_24hr_vs_8hr	NS
MA1516.1.KLF3	9408	0.885902	0.971793	1.9902	2.23689	0.332585	1.46879	0.141889	MA1516.1	KLF3	ENSG00000109787	C2H2 ZF	-0.153616	0.725803	CD4_24hr_vs_8hr	NS
MA0524.2.TFAP2C	692	-0.136436	-0.155159	1.10169	1.13435	0.0139434	-0.230646	0.81759	MA0524.2	TFAP2C	ENSG00000087510	AP-2	-1.05403	0.183216	CD4_24hr_vs_8hr	NS
MA0522.3.TCF3	1250	0.91316	1.13445	1.62503	1.91288	0.509132	2.41039	0.0159355	MA0522.3	TCF3	ENSG00000071564	bHLH	0.931474	0.0659962	CD4_24hr_vs_8hr	footprint
MA0655.1.JDP2	20923	0.715821	0.762735	0.882499	0.903492	0.0679075	0.0571658	0.954413	MA0655.1	JDP2	ENSG00000140044	bZIP	-0.702683	0.19909	CD4_24hr_vs_8hr	NS
MA1136.1.FOSB::JUNB(var.2)	252	1.34831	1.633	1.40699	1.63251	0.510202	2.41609	0.0156881	MA1136.1	FOSB	ENSG00000125740	bZIP	-3.00399	1.5771e-06	CD4_24hr_vs_8hr	both
MA0483.1.Gfi1b	8250	-0.172951	-0.139813	0.664779	0.648639	0.0169995	-0.214346	0.830277	MA0483.1	GFI1B	ENSG00000165702	C2H2 ZF	-0.804883	0.244729	CD4_24hr_vs_8hr	NS
MA0819.1.CLOCK	374	0.0735652	0.0286658	0.611097	0.637613	-0.0183837	-0.403059	0.686905	MA0819.1	CLOCK	ENSG00000134852	bHLH	0.360354	0.398997	CD4_24hr_vs_8hr	NS
MA0884.1.DUXA	5244	0.753058	0.709006	0.607275	0.572012	-0.0793154	-0.728031	0.466595	MA0884.1	DUXA	ENSG00000258873	Homeodomain	-1.14873	0.210394	CD4_24hr_vs_8hr	NS
MA0671.1.NFIX	4883	0.660422	0.676779	0.654453	0.652416	0.0143197	-0.228639	0.81915	MA0671.1	NFIX	ENSG00000008441	SMAD	-0.267785	0.529227	CD4_24hr_vs_8hr	NS
MA0150.2.Nfe2l2	7053	0.241708	0.246676	0.721091	0.76466	0.0485377	-0.0461408	0.963198	MA0150.2	NFE2L2	ENSG00000116044	bZIP	-0.169179	0.705827	CD4_24hr_vs_8hr	NS
MA0676.1.Nr2e1	7461	0.209465	0.21542	0.616522	0.588781	-0.0217858	-0.421204	0.673606	MA0676.1	NR2E1	ENSG00000112333	Nuclear receptor	-1.25387	0.137221	CD4_24hr_vs_8hr	NS
MA0504.1.NR2C2	8026	0.896984	1.03475	1.15794	1.26857	0.248394	1.01977	0.307836	MA0504.1	NR2C2	ENSG00000177463	Nuclear receptor	0.853929	0.0547785	CD4_24hr_vs_8hr	NS
MA0687.1.SPIC	10015	0.769644	0.764039	0.816478	0.811028	-0.0110545	-0.363969	0.715881	MA0687.1	SPIC	ENSG00000166211	Ets	-0.411979	0.645514	CD4_24hr_vs_8hr	NS
MA1544.1.OVOL1	348	-0.618963	-0.636312	1.26352	1.40198	0.121102	0.34087	0.733201	MA1544.1	OVOL1	ENSG00000172818	C2H2 ZF	-0.943666	0.208014	CD4_24hr_vs_8hr	NS
MA0138.2.REST	3425	0.00747708	-0.000983285	0.820727	0.836712	0.00752471	-0.264879	0.791103	MA0138.2	REST	ENSG00000084093	C2H2 ZF	0.347969	0.389909	CD4_24hr_vs_8hr	NS
MA1140.2.JUNB(var.2)	719	0.858318	0.924187	1.48358	1.69698	0.279264	1.18441	0.23625	MA1140.2	JUNB	ENSG00000171223	bZIP	0.309821	0.471687	CD4_24hr_vs_8hr	NS
MA0520.1.Stat6	5987	0.326983	0.306221	0.623813	0.588663	-0.0559108	-0.603205	0.546372	MA0520.1	STAT6	ENSG00000166888	STAT	0.378748	0.412825	CD4_24hr_vs_8hr	NS
MA1136.1.FOSB::JUNB(var.2)	252	1.34831	1.633	1.40699	1.63251	0.510202	2.41609	0.0156881	MA1136.1	JUNB	ENSG00000171223	bZIP	0.309821	0.471687	CD4_24hr_vs_8hr	footprint
MA0812.1.TFAP2B(var.2)	2516	-0.268986	-0.298655	1.47591	1.59738	0.0918059	0.184625	0.853523	MA0812.1	TFAP2B	ENSG00000008196	AP-2	-1.13548	0.140026	CD4_24hr_vs_8hr	NS
MA0649.1.HEY2	596	0.589881	0.62467	1.28316	1.41853	0.170169	0.602566	0.546798	MA0649.1	HEY2	ENSG00000135547	bHLH	-1.49072	0.0615947	CD4_24hr_vs_8hr	NS
MA1155.1.ZSCAN4	10477	0.251282	0.247398	0.590675	0.599776	0.00521687	-0.277188	0.781636	MA1155.1	ZSCAN4	ENSG00000180532	C2H2 ZF	-0.901916	0.270888	CD4_24hr_vs_8hr	NS
MA0793.1.POU6F2	4290	0.601834	0.546826	0.588098	0.523802	-0.119304	-0.941304	0.346549	MA0793.1	POU6F2	ENSG00000106536	Homeodomain,POU	-1.28779	0.0854344	CD4_24hr_vs_8hr	NS
MA0603.1.Arntl	3056	0.75165	0.934052	1.73	2.06031	0.512714	2.42949	0.01512	MA0603.1	ARNTL	ENSG00000133794	bHLH	0.328403	0.383524	CD4_24hr_vs_8hr	footprint
MA0115.1.NR1H2::RXRA	3284	0.222105	0.225239	0.632799	0.617162	-0.0125026	-0.371693	0.710122	MA0115.1	NR1H2	ENSG00000131408	Nuclear receptor	0.695009	0.132287	CD4_24hr_vs_8hr	NS
MA0115.1.NR1H2::RXRA	3284	0.222105	0.225239	0.632799	0.617162	-0.0125026	-0.371693	0.710122	MA0115.1	RXRA	ENSG00000186350	Nuclear receptor	0.014903	0.967727	CD4_24hr_vs_8hr	NS
MA1419.1.IRF4	6592	0.375701	0.357326	0.95027	0.876449	-0.092196	-0.796728	0.425609	MA1419.1	IRF4	ENSG00000137265	IRF	-0.315357	0.545414	CD4_24hr_vs_8hr	NS
MA1625.1.Stat5b	5229	-0.268281	-0.261004	0.797315	0.783669	-0.0063681	-0.338975	0.734629	MA1625.1	STAT5B	ENSG00000173757	STAT	-0.382697	0.383268	CD4_24hr_vs_8hr	NS
MA0854.1.Alx1	720	0.487688	0.430246	0.488429	0.449556	-0.0963154	-0.818699	0.412958	MA0854.1	ALX1	ENSG00000180318	Homeodomain	-0.769735	0.348616	CD4_24hr_vs_8hr	NS
MA0095.2.YY1	6596	0.380332	0.41495	0.913999	0.986356	0.106974	0.265524	0.790606	MA0095.2	YY1	ENSG00000100811	C2H2 ZF	0.589431	0.187189	CD4_24hr_vs_8hr	NS
MA0750.2.ZBTB7A	7961	0.230978	0.220873	1.79932	2.02164	0.212219	0.826832	0.408332	MA0750.2	ZBTB7A	ENSG00000178951	C2H2 ZF	0.383766	0.362577	CD4_24hr_vs_8hr	NS
MA0131.2.HINFP	2809	-0.314228	-0.340888	2.11735	2.35651	0.212495	0.828309	0.407496	MA0131.2	HINFP	ENSG00000172273	C2H2 ZF	0.268706	0.439439	CD4_24hr_vs_8hr	NS
MA0615.1.Gmeb1	499	1.48249	1.72817	1.88853	2.15862	0.515774	2.44581	0.0144527	MA0615.1	GMEB1	ENSG00000162419	SAND	0.117663	0.777014	CD4_24hr_vs_8hr	footprint
MA0146.2.Zfx	9867	-0.0653196	-0.0880442	1.4326	1.58261	0.12729	0.373877	0.708496	MA0146.2	ZFX	ENSG00000005889	C2H2 ZF	-0.246072	0.552513	CD4_24hr_vs_8hr	NS
MA0516.2.SP2	12874	1.54652	1.7828	1.91286	2.19692	0.520337	2.47015	0.0135058	MA0516.2	SP2	ENSG00000167182	C2H2 ZF	-0.027849	0.948468	CD4_24hr_vs_8hr	footprint
MA0035.4.GATA1	4448	0.599484	0.552173	0.582566	0.531738	-0.098138	-0.828419	0.407433	MA0035.4	GATA1	ENSG00000102145	GATA	-1.24382	0.127837	CD4_24hr_vs_8hr	NS
MA1639.1.MEIS1(var.2)	2012	0.780638	0.735309	0.650957	0.615467	-0.0808187	-0.736049	0.461701	MA1639.1	MEIS1	ENSG00000143995	Homeodomain	-1.28295	0.0676946	CD4_24hr_vs_8hr	NS
MA0484.2.HNF4G	158	-1.01955	-1.06021	0.634631	0.658688	-0.0165962	-0.393525	0.693932	MA0484.2	HNF4G	ENSG00000164749	Nuclear receptor	-0.840403	0.271759	CD4_24hr_vs_8hr	NS
MA0736.1.GLIS2	3722	0.503282	0.59949	1.37862	1.56865	0.286233	1.22158	0.221866	MA0736.1	GLIS2	ENSG00000126603	C2H2 ZF	-0.0676373	0.904328	CD4_24hr_vs_8hr	NS
MA0799.1.RFX4	746	0.0859362	0.0727208	0.691242	0.682311	-0.0221463	-0.423126	0.672203	MA0799.1	RFX4	ENSG00000111783	RFX	-1.1073	0.110691	CD4_24hr_vs_8hr	NS
MA0122.3.Nkx3-2	4214	0.341543	0.330223	0.558929	0.511572	-0.0586774	-0.61796	0.536601	MA0122.3	NKX3-2	ENSG00000109705	Homeodomain	-1.3159	0.122861	CD4_24hr_vs_8hr	NS
MA0079.4.SP1	14416	1.42657	1.624	2.34001	2.66335	0.520768	2.47245	0.0134192	MA0079.4	SP1	ENSG00000185591	C2H2 ZF	0.643092	0.177418	CD4_24hr_vs_8hr	footprint
MA0485.2.HOXC9	90	0.419908	0.217272	0.6362	0.558294	-0.280541	-1.80125	0.071664	MA0485.2	HOXC9	ENSG00000180806	Homeodomain	-1.37889	0.11228	CD4_24hr_vs_8hr	NS
MA1622.1.Smad2::Smad3	18686	0.281922	0.272695	0.869025	0.916453	0.0382009	-0.101271	0.919335	MA1622.1	SMAD2	ENSG00000175387	NA	0.589027	0.189133	CD4_24hr_vs_8hr	NS
MA1622.1.Smad2::Smad3	18686	0.281922	0.272695	0.869025	0.916453	0.0382009	-0.101271	0.919335	MA1622.1	SMAD3	ENSG00000166949	SMAD	0.319167	0.421119	CD4_24hr_vs_8hr	NS
MA0892.1.GSX1	393	0.652621	0.501018	0.592568	0.529528	-0.214644	-1.44979	0.147118	MA0892.1	GSX1	ENSG00000169840	Homeodomain	-1.10364	0.178785	CD4_24hr_vs_8hr	NS
MA0162.4.EGR1	17026	1.28025	1.50089	2.01271	2.31424	0.522168	2.47991	0.0131414	MA0162.4	EGR1	ENSG00000120738	C2H2 ZF	-0.442242	0.305303	CD4_24hr_vs_8hr	footprint
MA1636.1.CEBPG(var.2)	5774	0.616644	0.606863	0.577838	0.550452	-0.0371675	-0.50324	0.614795	MA1636.1	CEBPG	ENSG00000153879	bZIP	-0.325485	0.420168	CD4_24hr_vs_8hr	NS
MA0752.1.ZNF410	2872	0.489138	0.473248	0.553059	0.525964	-0.0429853	-0.534268	0.593156	MA0752.1	ZNF410	ENSG00000119725	C2H2 ZF	-0.572415	0.206967	CD4_24hr_vs_8hr	NS
MA0471.2.E2F6	14443	1.396	1.55948	1.77781	1.98408	0.369758	1.66705	0.0955037	MA0471.2	E2F6	ENSG00000169016	E2F	-0.316679	0.376082	CD4_24hr_vs_8hr	NS
MA0912.2.HOXD3	1955	0.91218	0.874624	0.692382	0.650944	-0.0789946	-0.72632	0.467643	MA0912.2	HOXD3	ENSG00000128652	Homeodomain	-1.10611	0.152527	CD4_24hr_vs_8hr	NS
MA0741.1.KLF16	25182	1.50193	1.72987	2.03834	2.33757	0.527174	2.50661	0.0121895	MA0741.1	KLF16	ENSG00000129911	C2H2 ZF	0.497779	0.268696	CD4_24hr_vs_8hr	footprint
MA1129.1.FOSL1::JUN(var.2)	4249	1.5919	1.89874	1.57085	1.79419	0.530183	2.52266	0.0116472	MA1129.1	FOSL1	ENSG00000175592	bZIP	-0.917026	0.0959948	CD4_24hr_vs_8hr	footprint
MA1550.1.PPARD	3813	0.248193	0.280191	0.797626	0.816249	0.0506203	-0.0350335	0.972053	MA1550.1	PPARD	ENSG00000112033	Nuclear receptor	0.799442	0.065531	CD4_24hr_vs_8hr	NS
MA0734.2.GLI2	859	0.942602	1.1009	1.09797	1.21143	0.271758	1.14438	0.252467	MA0734.2	GLI2	ENSG00000074047	C2H2 ZF	-0.99475	0.105706	CD4_24hr_vs_8hr	NS
MA0813.1.TFAP2B(var.3)	808	0.304075	0.414174	1.25847	1.39917	0.250795	1.03257	0.301803	MA0813.1	TFAP2B	ENSG00000008196	AP-2	-1.13548	0.140026	CD4_24hr_vs_8hr	NS
MA0788.1.POU3F3	4023	0.577534	0.503182	0.522396	0.450569	-0.146179	-1.08464	0.278081	MA0788.1	POU3F3	ENSG00000198914	Homeodomain,POU	-1.46953	0.066051	CD4_24hr_vs_8hr	NS
MA1107.2.KLF9	24481	0.933853	1.06761	1.22696	1.37697	0.283772	1.20846	0.226872	MA1107.2	KLF9	ENSG00000119138	C2H2 ZF	-0.728626	0.123999	CD4_24hr_vs_8hr	NS
MA1554.1.RFX7	3380	0.914234	0.972984	1.15403	1.2366	0.141322	0.448712	0.65364	MA1554.1	RFX7	ENSG00000181827	RFX	0.443926	0.30379	CD4_24hr_vs_8hr	NS
MA0658.1.LHX6	1433	0.434819	0.390278	0.51039	0.45425	-0.100681	-0.84198	0.399799	MA0658.1	LHX6	ENSG00000106852	Homeodomain	-1.23558	0.073773	CD4_24hr_vs_8hr	NS
MA0477.2.FOSL1	19667	0.445835	0.45715	0.882712	0.927743	0.0563447	-0.00450324	0.996407	MA0477.2	FOSL1	ENSG00000175592	bZIP	-0.917026	0.0959948	CD4_24hr_vs_8hr	NS
MA0480.1.Foxo1	6737	0.597247	0.586758	0.634787	0.628295	-0.0169803	-0.395574	0.69242	MA0480.1	FOXO1	ENSG00000150907	Forkhead	0.253513	0.559947	CD4_24hr_vs_8hr	NS
MA0498.2.MEIS1	3526	-0.216379	-0.213378	0.736973	0.73596	0.00198686	-0.294415	0.768441	MA0498.2	MEIS1	ENSG00000143995	Homeodomain	-1.28295	0.0676946	CD4_24hr_vs_8hr	NS
MA0665.1.MSC	3350	-0.729736	-0.692676	0.634432	0.613552	0.0161802	-0.218716	0.826871	MA0665.1	MSC	ENSG00000178860	bHLH	-0.49989	0.437476	CD4_24hr_vs_8hr	NS
MA1129.1.FOSL1::JUN(var.2)	4249	1.5919	1.89874	1.57085	1.79419	0.530183	2.52266	0.0116472	MA1129.1	JUN	ENSG00000177606	bZIP	-0.629717	0.157553	CD4_24hr_vs_8hr	footprint
MA1653.1.ZNF148	21018	1.98765	2.27112	1.88565	2.1356	0.533427	2.53996	0.0110865	MA1653.1	ZNF148	ENSG00000163848	NA	0.245106	0.541799	CD4_24hr_vs_8hr	footprint
MA0735.1.GLIS1	1569	0.0160563	0.0454526	1.42534	1.60128	0.205337	0.790131	0.429452	MA0735.1	GLIS1	ENSG00000174332	C2H2 ZF	-1.12082	0.155479	CD4_24hr_vs_8hr	NS
MA0846.1.FOXC2	9075	0.503597	0.501562	0.508545	0.488192	-0.0223872	-0.424411	0.671266	MA0846.1	FOXC2	ENSG00000176692	Forkhead	-1.22309	0.131037	CD4_24hr_vs_8hr	NS
MA0472.2.EGR2	6138	1.58201	1.81245	2.02467	2.33145	0.537236	2.56027	0.010459	MA0472.2	EGR2	ENSG00000122877	C2H2 ZF	-1.9371	0.000291072	CD4_24hr_vs_8hr	both
MA0911.1.Hoxa11	1892	0.224875	0.193274	0.615888	0.595037	-0.052452	-0.584758	0.558711	MA0911.1	HOXA11	ENSG00000005073	Homeodomain	-1.16592	0.152457	CD4_24hr_vs_8hr	NS
MA1607.1.Foxl2	6760	0.368367	0.360214	0.530812	0.510246	-0.0287192	-0.458182	0.646822	MA1607.1	FOXL2	ENSG00000183770	Forkhead	-0.961184	0.207358	CD4_24hr_vs_8hr	NS
MA0753.2.ZNF740	21741	1.90028	2.21303	1.5179	1.7534	0.548249	2.61901	0.00881852	MA0753.2	ZNF740	ENSG00000139651	C2H2 ZF	0.144405	0.704932	CD4_24hr_vs_8hr	footprint
MA1148.1.PPARA::RXRA	4171	0.449471	0.456435	0.702256	0.691441	-0.00385183	-0.325555	0.744761	MA1148.1	RXRA	ENSG00000186350	Nuclear receptor	0.014903	0.967727	CD4_24hr_vs_8hr	NS
MA1564.1.SP9	20812	1.41492	1.62611	2.34918	2.69148	0.553493	2.64698	0.00812133	MA1564.1	SP9	ENSG00000217236	C2H2 ZF	-0.780728	0.317112	CD4_24hr_vs_8hr	footprint
MA0685.1.SP4	11806	1.53753	1.76712	2.39671	2.7318	0.564674	2.70661	0.00679735	MA0685.1	SP4	ENSG00000105866	C2H2 ZF	0.648917	0.131171	CD4_24hr_vs_8hr	footprint
MA0746.2.SP3	18989	1.66885	1.90772	2.32621	2.65463	0.567289	2.72056	0.00651713	MA0746.2	SP3	ENSG00000172845	C2H2 ZF	0.731532	0.12268	CD4_24hr_vs_8hr	footprint
MA0105.4.NFKB1	2294	0.0069159	-0.035373	0.902973	0.90644	-0.0388219	-0.512063	0.608607	MA0105.4	NFKB1	ENSG00000109320	Rel	-0.36239	0.463619	CD4_24hr_vs_8hr	NS
MA0461.2.Atoh1	33	0.436581	0.264539	0.384597	0.374911	-0.181727	-1.27423	0.202581	MA0461.2	ATOH1	ENSG00000172238	bHLH	-1.13788	0.175594	CD4_24hr_vs_8hr	NS
MA0732.1.EGR3	8141	1.64001	1.91612	2.10385	2.42982	0.602073	2.90608	0.0036599	MA0732.1	EGR3	ENSG00000179388	C2H2 ZF	-1.12216	0.026721	CD4_24hr_vs_8hr	both
MA1616.1.Prdm15	4212	0.0250651	0.031905	0.710288	0.70211	-0.00133865	-0.312151	0.754926	MA1616.1	PRDM15	ENSG00000141956	NA	-0.0922824	0.813739	CD4_24hr_vs_8hr	NS
MA0050.2.IRF1	35635	0.854409	0.826876	0.692641	0.648897	-0.0712774	-0.685161	0.493242	MA0050.2	IRF1	ENSG00000125347	IRF	-0.134559	0.764967	CD4_24hr_vs_8hr	NS
MA0481.3.FOXP1	1339	0.330556	0.29571	0.457341	0.421169	-0.0710177	-0.683776	0.494116	MA0481.3	FOXP1	ENSG00000114861	Forkhead	-0.318958	0.496591	CD4_24hr_vs_8hr	NS
MA0661.1.MEOX1	295	0.563414	0.535641	0.607895	0.56092	-0.0747469	-0.703665	0.481641	MA0661.1	MEOX1	ENSG00000005102	Homeodomain	-0.607074	0.386667	CD4_24hr_vs_8hr	NS
MA1522.1.MAZ	23590	2.22382	2.55957	2.01517	2.29046	0.611042	2.95391	0.00313772	MA1522.1	MAZ	ENSG00000103495	C2H2 ZF	1.46187	0.00546615	CD4_24hr_vs_8hr	both
MA1604.1.Ebf2	6634	0.436234	0.439479	0.880445	0.918577	0.0413771	-0.0843312	0.932793	MA1604.1	EBF2	ENSG00000221818	EBF1	-1.13899	0.103823	CD4_24hr_vs_8hr	NS
MA0875.1.BARX1	1092	0.344541	0.302733	0.506926	0.46579	-0.0829431	-0.747379	0.454835	MA0875.1	BARX1	ENSG00000131668	Homeodomain	-1.08126	0.194299	CD4_24hr_vs_8hr	NS
MA0668.1.NEUROD2	289	0.848359	0.910764	0.878247	0.938955	0.123113	0.3516	0.725138	MA0668.1	NEUROD2	ENSG00000171532	bHLH	-1.10779	0.148018	CD4_24hr_vs_8hr	NS
MA0067.1.Pax2	1328	-0.357439	-0.411349	1.55493	1.80496	0.196113	0.740937	0.458732	MA0067.1	PAX2	ENSG00000075891	Homeodomain,Paired box	-1.10403	0.0947503	CD4_24hr_vs_8hr	NS
MA1483.1.ELF2	4364	-1.07509	-1.27918	1.66458	1.89272	0.0240486	-0.176751	0.859704	MA1483.1	ELF2	ENSG00000109381	Ets	0.358152	0.34674	CD4_24hr_vs_8hr	NS
MA0114.4.HNF4A	4063	-0.202831	-0.183188	0.561932	0.542721	0.000431865	-0.302708	0.762112	MA0114.4	HNF4A	ENSG00000101076	Nuclear receptor	-1.125	0.139622	CD4_24hr_vs_8hr	NS
MA1569.1.TFAP2E	8764	0.161773	0.184835	1.55976	1.73724	0.200538	0.764535	0.444548	MA1569.1	TFAP2E	ENSG00000116819	AP-2	-0.589789	0.297605	CD4_24hr_vs_8hr	NS
MA0768.1.LEF1	8289	0.49236	0.45351	0.635231	0.587495	-0.0865866	-0.766811	0.443194	MA0768.1	LEF1	ENSG00000138795	Sox	0.912198	0.0867464	CD4_24hr_vs_8hr	NS
MA0593.1.FOXP2	4423	0.621872	0.60149	0.625019	0.602202	-0.0431993	-0.53541	0.592367	MA0593.1	FOXP2	ENSG00000128573	Forkhead	-1.36835	0.0781594	CD4_24hr_vs_8hr	NS
MA1644.1.NFYC	6215	2.07819	2.41734	2.01243	2.28496	0.611682	2.95733	0.0031032	MA1644.1	NFYC	ENSG00000066136	Unknown	0.661165	0.149234	CD4_24hr_vs_8hr	footprint
MA1534.1.NR1I3	4667	0.137979	0.135103	0.614451	0.57626	-0.0410679	-0.524042	0.600249	MA1534.1	NR1I3	ENSG00000143257	Nuclear receptor	-0.738004	0.314901	CD4_24hr_vs_8hr	NS
MA1560.1.SOHLH2	1638	0.955603	1.17751	1.8898	2.29688	0.628983	3.0496	0.00229148	MA1560.1	SOHLH2	ENSG00000120669	bHLH	-0.911349	0.246802	CD4_24hr_vs_8hr	footprint
MA1138.1.FOSL2::JUNB	21465	0.35605	0.377453	0.899027	0.949068	0.0714436	0.0760249	0.939399	MA1138.1	JUNB	ENSG00000171223	bZIP	0.309821	0.471687	CD4_24hr_vs_8hr	NS
MA0092.1.Hand1::Tcf3	5190	0.171372	0.187116	0.653273	0.643022	0.00549319	-0.275714	0.782768	MA0092.1	HAND1	ENSG00000113196	bHLH	-0.740782	0.374271	CD4_24hr_vs_8hr	NS
MA0092.1.Hand1::Tcf3	5190	0.171372	0.187116	0.653273	0.643022	0.00549319	-0.275714	0.782768	MA0092.1	TCF3	ENSG00000071564	bHLH	0.931474	0.0659962	CD4_24hr_vs_8hr	NS
MA0502.2.NFYB	6105	1.69556	2.02391	2.08729	2.38873	0.629798	3.05394	0.00225855	MA0502.2	NFYB	ENSG00000120837	Unknown	0.367567	0.298664	CD4_24hr_vs_8hr	footprint
MA1134.1.FOS::JUNB	19034	0.224342	0.208865	0.883879	0.935915	0.0365591	-0.110028	0.912388	MA1134.1	JUNB	ENSG00000171223	bZIP	0.309821	0.471687	CD4_24hr_vs_8hr	NS
MA0713.1.PHOX2A	2249	0.686134	0.618686	0.504709	0.456049	-0.116109	-0.924266	0.355348	MA0713.1	PHOX2A	ENSG00000165462	Homeodomain	-1.07504	0.186625	CD4_24hr_vs_8hr	NS
MA0076.2.ELK4	3390	0.360704	0.36207	1.59554	1.78306	0.188881	0.702363	0.482453	MA0076.2	ELK4	ENSG00000158711	Ets	-0.207896	0.657153	CD4_24hr_vs_8hr	NS
MA0710.1.NOTO	856	0.663674	0.604374	0.646504	0.580285	-0.12552	-0.974456	0.32983	MA0710.1	NOTO	ENSG00000214513	Homeodomain	-0.547816	0.455304	CD4_24hr_vs_8hr	NS
MA0616.2.HES2	73	1.17174	1.37782	2.65647	3.09868	0.648293	3.15259	0.0016183	MA0616.2	HES2	ENSG00000069812	bHLH	-0.999566	0.167547	CD4_24hr_vs_8hr	footprint
MA1118.1.SIX1	4870	0.250801	0.270397	0.696543	0.663719	-0.0132282	-0.375563	0.707242	MA1118.1	SIX1	ENSG00000126778	Homeodomain	-1.01692	0.174394	CD4_24hr_vs_8hr	NS
MA1505.1.HOXC8	1574	0.651013	0.584879	0.555333	0.488677	-0.132789	-1.01323	0.310951	MA1505.1	HOXC8	ENSG00000037965	Homeodomain	-1.18774	0.162677	CD4_24hr_vs_8hr	NS
MA1099.2.HES1	4929	1.7466	2.04317	2.29082	2.68036	0.686111	3.35428	0.000795707	MA1099.2	HES1	ENSG00000114315	bHLH	-0.316803	0.635814	CD4_24hr_vs_8hr	footprint
MA0636.1.BHLHE41	1723	1.49993	1.84954	1.8949	2.25524	0.709958	3.48147	0.000498675	MA0636.1	BHLHE41	ENSG00000123095	bHLH	-1.04091	0.167547	CD4_24hr_vs_8hr	footprint
MA0697.1.ZIC3	1879	0.391712	0.438313	1.53501	1.72144	0.233034	0.93785	0.348322	MA0697.1	ZIC3	ENSG00000156925	C2H2 ZF	-0.814274	0.286082	CD4_24hr_vs_8hr	NS
MA1114.1.PBX3	6260	0.238234	0.253701	0.878404	0.911924	0.0489869	-0.0437454	0.965107	MA1114.1	PBX3	ENSG00000167081	Homeodomain	0.512663	0.162326	CD4_24hr_vs_8hr	NS
MA1466.1.ATF6	1718	0.587324	0.693793	1.53416	1.76176	0.334062	1.47667	0.139764	MA1466.1	ATF6	ENSG00000118217	bZIP	-0.0329343	0.943316	CD4_24hr_vs_8hr	NS
MA0770.1.HSF2	3268	-0.07396	-0.0763074	0.634139	0.628258	-0.00822893	-0.348899	0.727165	MA0770.1	HSF2	ENSG00000025156	HSF	0.43602	0.256229	CD4_24hr_vs_8hr	NS
MA0829.2.SREBF1(var.2)	4294	0.418379	0.42878	0.647129	0.640674	0.00394577	-0.283967	0.776436	MA0829.2	SREBF1	ENSG00000072310	bHLH	0.870525	0.0891476	CD4_24hr_vs_8hr	NS
MA1475.1.CREB3L4(var.2)	716	0.480612	0.626469	2.67194	3.25047	0.724387	3.55843	0.000373085	MA1475.1	CREB3L4	ENSG00000143578	bZIP	0.809734	0.114842	CD4_24hr_vs_8hr	footprint
MA1147.1.NR4A2::RXRA	901	0.208354	0.249103	0.913396	0.946274	0.0736278	0.0876743	0.930136	MA1147.1	RXRA	ENSG00000186350	Nuclear receptor	0.014903	0.967727	CD4_24hr_vs_8hr	NS
MA0781.1.PAX9	452	0.672233	0.779126	0.963645	1.08452	0.227766	0.909753	0.362953	MA0781.1	PAX9	ENSG00000198807	Paired box	-1.05909	0.153246	CD4_24hr_vs_8hr	NS
MA1421.1.TCF7L1	8642	0.184007	0.179592	0.635753	0.606877	-0.0332915	-0.482568	0.629403	MA1421.1	TCF7L1	ENSG00000152284	Sox	-0.61585	0.295656	CD4_24hr_vs_8hr	NS
MA1463.1.ARGFX	533	0.723358	0.655666	0.560598	0.511133	-0.117158	-0.929858	0.352445	MA1463.1	ARGFX	ENSG00000186103	Homeodomain	-0.545623	0.561146	CD4_24hr_vs_8hr	NS
MA0818.1.BHLHE22	1239	0.609412	0.570134	0.523341	0.469973	-0.0926456	-0.799126	0.424217	MA0818.1	BHLHE22	ENSG00000180828	bHLH	-1.19951	0.141603	CD4_24hr_vs_8hr	NS
MA0890.1.GBX2	224	0.425002	0.350332	0.535835	0.469369	-0.141137	-1.05775	0.290171	MA0890.1	GBX2	ENSG00000168505	Homeodomain	-1.23253	0.126656	CD4_24hr_vs_8hr	NS
MA1631.1.ASCL1(var.2)	2751	-0.00818546	0.0064756	1.0152	1.06744	0.0668994	0.0517891	0.958697	MA1631.1	ASCL1	ENSG00000139352	bHLH	-1.21779	0.135544	CD4_24hr_vs_8hr	NS
MA1102.2.CTCFL	16199	1.05839	1.23372	1.71015	1.90602	0.371198	1.67473	0.0939874	MA1102.2	CTCFL	ENSG00000124092	C2H2 ZF	-0.863185	0.222502	CD4_24hr_vs_8hr	NS
MA0466.2.CEBPB	54	0.609757	0.490766	0.588119	0.527056	-0.180055	-1.26531	0.20576	MA0466.2	CEBPB	ENSG00000172216	bZIP	-0.563534	0.169935	CD4_24hr_vs_8hr	NS
MA0867.2.SOX4	9147	0.640104	0.63325	0.6642	0.647836	-0.0232183	-0.428843	0.668037	MA0867.2	SOX4	ENSG00000124766	Sox	-0.250678	0.508055	CD4_24hr_vs_8hr	NS
MA0651.1.HOXC11	105	0.319991	0.26717	0.415023	0.354354	-0.113491	-0.9103	0.362664	MA0651.1	HOXC11	ENSG00000123388	Homeodomain	-1.36598	0.141113	CD4_24hr_vs_8hr	NS
MA0862.1.GMEB2	827	2.12236	2.59391	1.97687	2.24006	0.734733	3.6136	0.000301972	MA0862.1	GMEB2	ENSG00000101216	SAND	0.321051	0.398253	CD4_24hr_vs_8hr	footprint
MA0060.3.NFYA	556	2.2595	2.64451	2.46725	2.83006	0.747816	3.68338	0.000230163	MA0060.3	NFYA	ENSG00000001167	CBF/NF-Y	-0.209607	0.613529	CD4_24hr_vs_8hr	footprint
MA0506.1.NRF1	11644	1.85199	2.15795	2.93042	3.38636	0.761893	3.75846	0.000170965	MA0506.1	NRF1	ENSG00000106459	Unknown	-0.883648	0.0410092	CD4_24hr_vs_8hr	both
MA0632.2.TCFL5	5934	2.14261	2.51505	2.61831	3.05506	0.809188	4.0107	6.05382e-05	MA0632.2	TCFL5	ENSG00000101190	bHLH	0.626473	0.121173	CD4_24hr_vs_8hr	footprint
MA1600.1.ZNF684	5110	0.491862	0.537605	0.847327	0.883357	0.0817729	0.131115	0.895684	MA1600.1	ZNF684	ENSG00000117010	C2H2 ZF	-0.549022	0.257804	CD4_24hr_vs_8hr	NS
MA1480.1.DPRX	2452	0.171254	0.146927	0.532169	0.507502	-0.0489943	-0.566317	0.571179	MA1480.1	DPRX	ENSG00000204595	Homeodomain	-0.992981	0.290372	CD4_24hr_vs_8hr	NS
MA1574.1.THRB	4300	0.365661	0.404748	0.887924	0.937628	0.0887904	0.168542	0.866157	MA1574.1	THRB	ENSG00000151090	Nuclear receptor	-1.28437	0.0797386	CD4_24hr_vs_8hr	NS
MA0773.1.MEF2D	1864	0.495431	0.446518	0.505763	0.451905	-0.102771	-0.853129	0.393588	MA0773.1	MEF2D	ENSG00000116604	MADS box	0.458834	0.263844	CD4_24hr_vs_8hr	NS
MA0823.1.HEY1	219	1.57602	1.9483	2.50427	2.94626	0.814272	4.03782	5.39512e-05	MA0823.1	HEY1	ENSG00000164683	bHLH	-0.760775	0.295401	CD4_24hr_vs_8hr	footprint
MA0604.1.Atf1	1930	1.75896	2.20825	2.4613	2.91631	0.904299	4.51797	6.24365e-06	MA0604.1	ATF1	ENSG00000123268	bZIP	0.361094	0.359097	CD4_24hr_vs_8hr	footprint
MA0028.2.ELK1	192	2.18208	2.60939	2.91719	3.40311	0.913235	4.56562	4.98012e-06	MA0028.2	ELK1	ENSG00000126767	Ets	0.979492	0.0459467	CD4_24hr_vs_8hr	both
MA1125.1.ZNF384	63181	0.703888	0.717877	0.584866	0.584459	0.0135826	-0.23257	0.816096	MA1125.1	ZNF384	ENSG00000126746	C2H2 ZF	0.440028	0.299602	CD4_24hr_vs_8hr	NS
MA0869.1.Sox11	4518	-0.023143	-0.013015	0.535505	0.485609	-0.039768	-0.517109	0.60508	MA0869.1	SOX11	ENSG00000176887	Sox	-0.92319	0.162859	CD4_24hr_vs_8hr	NS
