# Supplementary material for: Dynamic chromatin architecture identifies new autoimmune-associated enhancers for IL2 and novel genes regulating CD4+ T cell activation
Source: eLife. 2024 Sep 20;13:RP96852. doi: 10.7554/eLife.96852 (PMC11418197; doi:10.7554/eLife.96852)
Supplement: Supplementary file 11. [file elife-96852-supp11.xlsx]

## Sheet: SupTab_10_tcell_tf2tf_regulator
Table S11: TF target gene pathway enrichment
target_gene_name	target_gene_id	regulatory_gene_name	regulatory_TF_family	regulatory_gene_id	weight	regulatory_gene_type	regulatory_CD4_unstim_TPM	regulatory_CD4_8hr_TPM	regulatory_CD4_24hr_TPM	target_gene_type	target_CD4_unstim_TPM	target_CD4_8hr_TPM	target_CD4_24hr_TPM
GABPA	ENSG00000154727.6	HIF1A	bHLH	ENSG00000100644.12	0.0072266	protein_coding	37.8509	193.534	125.593	protein_coding	10.4451	16.6224	11.9009
GABPA	ENSG00000154727.6	NR4A2	Nuclear receptor	ENSG00000153234.9	0.0123791	protein_coding	3.08795	132.95	51.2972	protein_coding	10.4451	16.6224	11.9009
GABPA	ENSG00000154727.6	ATF7	bZIP,C2H2 ZF	ENSG00000170653.14	0.00810049	protein_coding	12.0374	9.58847	13.0137	protein_coding	10.4451	16.6224	11.9009
GABPA	ENSG00000154727.6	NFKB1	Rel	ENSG00000109320.7	0.0111634	protein_coding	29.1567	506.789	296.345	protein_coding	10.4451	16.6224	11.9009
GABPA	ENSG00000154727.6	REL	Rel	ENSG00000162924.9	0.00930075	protein_coding	8.38764	216.888	56.7033	protein_coding	10.4451	16.6224	11.9009
GABPA	ENSG00000154727.6	ETV3	Ets	ENSG00000117036.7	0.00738742	protein_coding	12.9579	18.6252	12.707	protein_coding	10.4451	16.6224	11.9009
GABPA	ENSG00000154727.6	ELK4	Ets	ENSG00000158711.9	0.0094299	protein_coding	67.4856	107.039	70.1592	protein_coding	10.4451	16.6224	11.9009
GABPA	ENSG00000154727.6	AHR	bHLH	ENSG00000106546.8	0.00748675	protein_coding	9.41274	93.4629	53.6691	protein_coding	10.4451	16.6224	11.9009
GABPA	ENSG00000154727.6	E2F6	E2F	ENSG00000169016.12	0.0128378	protein_coding	2.84755	10.2704	6.21233	protein_coding	10.4451	16.6224	11.9009
BACH1	ENSG00000156273.11	KLF9	C2H2 ZF	ENSG00000119138.3	0.0142117	protein_coding	14.7466	42.3805	19.3454	protein_coding	15.2362	29.6887	9.70708
BACH1	ENSG00000156273.11	ZNF281	C2H2 ZF	ENSG00000162702.7	0.0118398	protein_coding	19.3751	26.911	17.9295	protein_coding	15.2362	29.6887	9.70708
BACH1	ENSG00000156273.11	RREB1	C2H2 ZF	ENSG00000124782.15	0.011548	protein_coding	16.4582	21.8455	9.185	protein_coding	15.2362	29.6887	9.70708
BACH1	ENSG00000156273.11	KLF6	C2H2 ZF	ENSG00000067082.10	0.0140159	protein_coding	20.002	29.0863	17.9519	protein_coding	15.2362	29.6887	9.70708
BACH1	ENSG00000156273.11	KLF10	C2H2 ZF	ENSG00000155090.10	0.00798079	protein_coding	2.98347	101.32	25.2161	protein_coding	15.2362	29.6887	9.70708
BACH1	ENSG00000156273.11	ELK3	Ets	ENSG00000111145.3	0.00832552	protein_coding	28.9716	53.2809	27.9617	protein_coding	15.2362	29.6887	9.70708
BACH1	ENSG00000156273.11	BCL6	C2H2 ZF	ENSG00000113916.13	0.0123195	protein_coding	4.17339	18.1066	5.56979	protein_coding	15.2362	29.6887	9.70708
BACH1	ENSG00000156273.11	ELF4	Ets	ENSG00000102034.12	0.00720874	protein_coding	26.4618	20.1657	33.0515	protein_coding	15.2362	29.6887	9.70708
BACH1	ENSG00000156273.11	ETV3	Ets	ENSG00000117036.7	0.00729336	protein_coding	12.9579	18.6252	12.707	protein_coding	15.2362	29.6887	9.70708
BACH1	ENSG00000156273.11	NFYA	CBF/NF-Y	ENSG00000001167.10	0.00843722	protein_coding	22.9157	43.4457	28.5316	protein_coding	15.2362	29.6887	9.70708
BACH1	ENSG00000156273.11	NRF1	Unknown	ENSG00000106459.10	0.0119889	protein_coding	12.1101	19.1807	7.90798	protein_coding	15.2362	29.6887	9.70708
BACH1	ENSG00000156273.11	ARNT	bHLH	ENSG00000143437.16	0.0128802	protein_coding	23.8486	13.5725	25.4699	protein_coding	15.2362	29.6887	9.70708
GABPA	ENSG00000154727.6	KLF9	C2H2 ZF	ENSG00000119138.3	0.00997963	protein_coding	14.7466	42.3805	19.3454	protein_coding	10.4451	16.6224	11.9009
BACH1	ENSG00000156273.11	TGIF1	Homeodomain	ENSG00000177426.16	0.0117652	protein_coding	11.7375	22.7534	3.25931	protein_coding	15.2362	29.6887	9.70708
GABPA	ENSG00000154727.6	STAT5A	STAT	ENSG00000126561.12	0.0133385	protein_coding	36.4983	316.372	118.146	protein_coding	10.4451	16.6224	11.9009
BACH1	ENSG00000156273.11	FOXN3	Forkhead	ENSG00000053254.11	0.0105331	protein_coding	27.663	22.1201	34.2645	protein_coding	15.2362	29.6887	9.70708
BACH1	ENSG00000156273.11	GABPA	Ets	ENSG00000154727.6	0.0080841	protein_coding	10.4451	16.6224	11.9009	protein_coding	15.2362	29.6887	9.70708
BACH1	ENSG00000156273.11	ZNF24	C2H2 ZF	ENSG00000172466.11	0.00944765	protein_coding	24.04	36.803	22.5491	protein_coding	15.2362	29.6887	9.70708
BACH1	ENSG00000156273.11	REL	Rel	ENSG00000162924.9	0.0126012	protein_coding	8.38764	216.888	56.7033	protein_coding	15.2362	29.6887	9.70708
BACH1	ENSG00000156273.11	RFX1	RFX	ENSG00000132005.4	0.00773575	protein_coding	12.2825	7.71665	10.0227	protein_coding	15.2362	29.6887	9.70708
BACH1	ENSG00000156273.11	NFATC2	Rel	ENSG00000101096.15	0.00755164	protein_coding	33.903	24.7075	33.2928	protein_coding	15.2362	29.6887	9.70708
BACH1	ENSG00000156273.11	DDIT3	bZIP	ENSG00000175197.6	0.00999524	protein_coding	12.2974	35.3201	14.9946	protein_coding	15.2362	29.6887	9.70708
BACH1	ENSG00000156273.11	FOSL2	bZIP	ENSG00000075426.7	0.00949855	protein_coding	2.97949	68.8857	12.7455	protein_coding	15.2362	29.6887	9.70708
BACH1	ENSG00000156273.11	BACH2	bZIP	ENSG00000112182.10	0.0122624	protein_coding	49.8115	217.835	76.7515	protein_coding	15.2362	29.6887	9.70708
BACH1	ENSG00000156273.11	IRF3	IRF	ENSG00000126456.11	0.00779752	protein_coding	26.1248	12.3178	23.4694	protein_coding	15.2362	29.6887	9.70708
BACH1	ENSG00000156273.11	ZNF460	C2H2 ZF	ENSG00000197714.4	0.00803829	protein_coding	31.8465	67.1283	30.8887	protein_coding	15.2362	29.6887	9.70708
BACH1	ENSG00000156273.11	ZNF263	C2H2 ZF	ENSG00000006194.6	0.0103704	protein_coding	13.8496	19.5448	8.63775	protein_coding	15.2362	29.6887	9.70708
BACH1	ENSG00000156273.11	LEF1	Sox	ENSG00000138795.5	0.00725057	protein_coding	364.591	202.089	280.925	protein_coding	15.2362	29.6887	9.70708
BACH1	ENSG00000156273.11	CEBPB	bZIP	ENSG00000172216.4	0.0113803	protein_coding	13.8991	21.8187	11.2238	protein_coding	15.2362	29.6887	9.70708
BACH1	ENSG00000156273.11	MGA	bHLH,T-box	ENSG00000174197.12	0.0093145	protein_coding	21.4715	52.8379	27.0435	protein_coding	15.2362	29.6887	9.70708
BACH1	ENSG00000156273.11	PKNOX1	Homeodomain	ENSG00000160199.10	0.00859565	protein_coding	6.08803	12.0409	6.80785	protein_coding	15.2362	29.6887	9.70708
BACH1	ENSG00000156273.11	ZNF136	C2H2 ZF	ENSG00000196646.7	0.00854099	protein_coding	7.35826	8.26587	5.50982	protein_coding	15.2362	29.6887	9.70708
RUNX1	ENSG00000159216.14	ZNF263	C2H2 ZF	ENSG00000006194.6	0.00820399	protein_coding	13.8496	19.5448	8.63775	protein_coding	21.5738	25.8568	16.771
RUNX1	ENSG00000159216.14	ZNF281	C2H2 ZF	ENSG00000162702.7	0.00769309	protein_coding	19.3751	26.911	17.9295	protein_coding	21.5738	25.8568	16.771
RUNX1	ENSG00000159216.14	ZNF24	C2H2 ZF	ENSG00000172466.11	0.0114871	protein_coding	24.04	36.803	22.5491	protein_coding	21.5738	25.8568	16.771
RUNX1	ENSG00000159216.14	RREB1	C2H2 ZF	ENSG00000124782.15	0.0143704	protein_coding	16.4582	21.8455	9.185	protein_coding	21.5738	25.8568	16.771
RUNX1	ENSG00000159216.14	ZNF136	C2H2 ZF	ENSG00000196646.7	0.0180652	protein_coding	7.35826	8.26587	5.50982	protein_coding	21.5738	25.8568	16.771
RUNX1	ENSG00000159216.14	BACH1	bZIP	ENSG00000156273.11	0.0191402	protein_coding	15.2362	29.6887	9.70708	protein_coding	21.5738	25.8568	16.771
RUNX1	ENSG00000159216.14	ZBTB6	C2H2 ZF	ENSG00000186130.4	0.0101402	protein_coding	14.1741	21.0704	12.5025	protein_coding	21.5738	25.8568	16.771
RUNX1	ENSG00000159216.14	IKZF1	C2H2 ZF	ENSG00000185811.12	0.0109661	protein_coding	140.55	182.375	130.244	protein_coding	21.5738	25.8568	16.771
RUNX1	ENSG00000159216.14	KLF6	C2H2 ZF	ENSG00000067082.10	0.0102523	protein_coding	20.002	29.0863	17.9519	protein_coding	21.5738	25.8568	16.771
RUNX1	ENSG00000159216.14	ZNF140	C2H2 ZF	ENSG00000196387.5	0.0186499	protein_coding	7.55863	11.9829	6.05519	protein_coding	21.5738	25.8568	16.771
RUNX1	ENSG00000159216.14	NRF1	Unknown	ENSG00000106459.10	0.00917265	protein_coding	12.1101	19.1807	7.90798	protein_coding	21.5738	25.8568	16.771
RUNX1	ENSG00000159216.14	EOMES	T-box	ENSG00000163508.8	0.00828194	protein_coding	5.25807	7.21463	1.02112	protein_coding	21.5738	25.8568	16.771
RUNX1	ENSG00000159216.14	ZKSCAN1	C2H2 ZF	ENSG00000106261.12	0.0118361	protein_coding	29.63	31.1672	19.9696	protein_coding	21.5738	25.8568	16.771
RUNX1	ENSG00000159216.14	FOXJ3	Forkhead	ENSG00000198815.4	0.00717517	protein_coding	35.5573	47.1979	34.4884	protein_coding	21.5738	25.8568	16.771
RUNX1	ENSG00000159216.14	TGIF1	Homeodomain	ENSG00000177426.16	0.0140737	protein_coding	11.7375	22.7534	3.25931	protein_coding	21.5738	25.8568	16.771
RUNX1	ENSG00000159216.14	ELK3	Ets	ENSG00000111145.3	0.00876454	protein_coding	28.9716	53.2809	27.9617	protein_coding	21.5738	25.8568	16.771
RUNX1	ENSG00000159216.14	E2F1	E2F	ENSG00000101412.9	0.0155926	protein_coding	3.27673	2.94519	105.532	protein_coding	21.5738	25.8568	16.771
RUNX1	ENSG00000159216.14	NR3C1	Nuclear receptor	ENSG00000113580.10	0.0141502	protein_coding	34.8792	35.9849	17.06	protein_coding	21.5738	25.8568	16.771
ETS2	ENSG00000157557.7	NR2F6	Nuclear receptor	ENSG00000160113.5	0.00848765	protein_coding	2.22949	6.45054	10.1467	protein_coding	7.37297	30.5099	26.3494
ETS2	ENSG00000157557.7	ATF3	bZIP	ENSG00000162772.12	0.00747979	protein_coding	1.83901	12.5986	5.37156	protein_coding	7.37297	30.5099	26.3494
ETS2	ENSG00000157557.7	SMAD4	SMAD	ENSG00000141646.9	0.00704066	protein_coding	13.9346	9.28591	7.65724	protein_coding	7.37297	30.5099	26.3494
ETS2	ENSG00000157557.7	IRF4	IRF	ENSG00000137265.10	0.00922727	protein_coding	5.6988	783.89	464.786	protein_coding	7.37297	30.5099	26.3494
ETS2	ENSG00000157557.7	KLF10	C2H2 ZF	ENSG00000155090.10	0.00722149	protein_coding	2.98347	101.32	25.2161	protein_coding	7.37297	30.5099	26.3494
ETS2	ENSG00000157557.7	RBPJ	CSL	ENSG00000168214.16	0.00823314	protein_coding	15.4007	45.7294	34.203	protein_coding	7.37297	30.5099	26.3494
ETS2	ENSG00000157557.7	NFIX	SMAD	ENSG00000008441.12	0.00813262	protein_coding	4.02934	24.3211	14.9281	protein_coding	7.37297	30.5099	26.3494
ETS2	ENSG00000157557.7	STAT4	STAT	ENSG00000138378.13	0.0084159	protein_coding	36.264	65.4242	65.4886	protein_coding	7.37297	30.5099	26.3494
PRDM15	ENSG00000141956.9	GABPA	Ets	ENSG00000154727.6	0.010764	protein_coding	10.4451	16.6224	11.9009	protein_coding	4.15744	9.23077	6.49964
PRDM15	ENSG00000141956.9	ARNT	bHLH	ENSG00000143437.16	0.00958025	protein_coding	23.8486	13.5725	25.4699	protein_coding	4.15744	9.23077	6.49964
PRDM15	ENSG00000141956.9	NR1D1	Nuclear receptor	ENSG00000126368.5	0.0164455	protein_coding	19.4206	54.1854	31.3215	protein_coding	4.15744	9.23077	6.49964
PRDM15	ENSG00000141956.9	IRF9	IRF	ENSG00000213928.4	0.0124416	protein_coding	3.67368	6.92631	4.52713	protein_coding	4.15744	9.23077	6.49964
PRDM15	ENSG00000141956.9	KLF9	C2H2 ZF	ENSG00000119138.3	0.0153747	protein_coding	14.7466	42.3805	19.3454	protein_coding	4.15744	9.23077	6.49964
PRDM15	ENSG00000141956.9	CEBPG	bZIP	ENSG00000153879.4	0.0123772	protein_coding	9.95546	26.2151	15.8662	protein_coding	4.15744	9.23077	6.49964
PRDM15	ENSG00000141956.9	EGR2	C2H2 ZF	ENSG00000122877.9	0.00837647	protein_coding	2.12493	158.341	31.8664	protein_coding	4.15744	9.23077	6.49964
PRDM15	ENSG00000141956.9	E2F6	E2F	ENSG00000169016.12	0.00999245	protein_coding	2.84755	10.2704	6.21233	protein_coding	4.15744	9.23077	6.49964
PRDM15	ENSG00000141956.9	ELK4	Ets	ENSG00000158711.9	0.0167102	protein_coding	67.4856	107.039	70.1592	protein_coding	4.15744	9.23077	6.49964
PRDM15	ENSG00000141956.9	LEF1	Sox	ENSG00000138795.5	0.00738577	protein_coding	364.591	202.089	280.925	protein_coding	4.15744	9.23077	6.49964
PRDM15	ENSG00000141956.9	HIF1A	bHLH	ENSG00000100644.12	0.00923611	protein_coding	37.8509	193.534	125.593	protein_coding	4.15744	9.23077	6.49964
PRDM15	ENSG00000141956.9	AHR	bHLH	ENSG00000106546.8	0.0113276	protein_coding	9.41274	93.4629	53.6691	protein_coding	4.15744	9.23077	6.49964
PRDM15	ENSG00000141956.9	MGA	bHLH,T-box	ENSG00000174197.12	0.0156166	protein_coding	21.4715	52.8379	27.0435	protein_coding	4.15744	9.23077	6.49964
PRDM15	ENSG00000141956.9	MAFK	bZIP	ENSG00000198517.5	0.0155204	protein_coding	7.86877	20.1437	11.0981	protein_coding	4.15744	9.23077	6.49964
PRDM15	ENSG00000141956.9	FOSL2	bZIP	ENSG00000075426.7	0.00721124	protein_coding	2.97949	68.8857	12.7455	protein_coding	4.15744	9.23077	6.49964
PRDM15	ENSG00000141956.9	NFE2L2	bZIP	ENSG00000116044.11	0.0092163	protein_coding	43.1876	100.955	67.5731	protein_coding	4.15744	9.23077	6.49964
PRDM15	ENSG00000141956.9	BACH2	bZIP	ENSG00000112182.10	0.0140581	protein_coding	49.8115	217.835	76.7515	protein_coding	4.15744	9.23077	6.49964
PRDM15	ENSG00000141956.9	STAT5A	STAT	ENSG00000126561.12	0.0133899	protein_coding	36.4983	316.372	118.146	protein_coding	4.15744	9.23077	6.49964
PRDM15	ENSG00000141956.9	ZNF143	C2H2 ZF	ENSG00000166478.5	0.0141078	protein_coding	13.0232	36.5983	22.2393	protein_coding	4.15744	9.23077	6.49964
PKNOX1	ENSG00000160199.10	ZBTB14	C2H2 ZF	ENSG00000198081.6	0.00739904	protein_coding	22.0902	8.83913	14.8651	protein_coding	6.08803	12.0409	6.80785
PKNOX1	ENSG00000160199.10	IKZF1	C2H2 ZF	ENSG00000185811.12	0.00781982	protein_coding	140.55	182.375	130.244	protein_coding	6.08803	12.0409	6.80785
PKNOX1	ENSG00000160199.10	CTCF	C2H2 ZF	ENSG00000102974.10	0.00756009	protein_coding	50.6801	45.7903	69.2994	protein_coding	6.08803	12.0409	6.80785
PKNOX1	ENSG00000160199.10	KLF10	C2H2 ZF	ENSG00000155090.10	0.00778673	protein_coding	2.98347	101.32	25.2161	protein_coding	6.08803	12.0409	6.80785
PKNOX1	ENSG00000160199.10	ELK3	Ets	ENSG00000111145.3	0.0108237	protein_coding	28.9716	53.2809	27.9617	protein_coding	6.08803	12.0409	6.80785
PKNOX1	ENSG00000160199.10	ELF4	Ets	ENSG00000102034.12	0.00886607	protein_coding	26.4618	20.1657	33.0515	protein_coding	6.08803	12.0409	6.80785
PKNOX1	ENSG00000160199.10	ELK4	Ets	ENSG00000158711.9	0.00887874	protein_coding	67.4856	107.039	70.1592	protein_coding	6.08803	12.0409	6.80785
PKNOX1	ENSG00000160199.10	ZNF263	C2H2 ZF	ENSG00000006194.6	0.00898002	protein_coding	13.8496	19.5448	8.63775	protein_coding	6.08803	12.0409	6.80785
PKNOX1	ENSG00000160199.10	FOSL1	bZIP	ENSG00000175592.4	0.00836609	protein_coding	1.60479	151.689	60.6658	protein_coding	6.08803	12.0409	6.80785
PKNOX1	ENSG00000160199.10	FOS	bZIP	ENSG00000170345.5	0.00893939	protein_coding	2.22869	22.6799	3.04045	protein_coding	6.08803	12.0409	6.80785
PKNOX1	ENSG00000160199.10	FOSL2	bZIP	ENSG00000075426.7	0.0095096	protein_coding	2.97949	68.8857	12.7455	protein_coding	6.08803	12.0409	6.80785
PKNOX1	ENSG00000160199.10	E2F6	E2F	ENSG00000169016.12	0.01039	protein_coding	2.84755	10.2704	6.21233	protein_coding	6.08803	12.0409	6.80785
PKNOX1	ENSG00000160199.10	EGR2	C2H2 ZF	ENSG00000122877.9	0.00829328	protein_coding	2.12493	158.341	31.8664	protein_coding	6.08803	12.0409	6.80785
PKNOX1	ENSG00000160199.10	EGR3	C2H2 ZF	ENSG00000179388.8	0.0116769	protein_coding	1.35095	132.127	45.4685	protein_coding	6.08803	12.0409	6.80785
PKNOX1	ENSG00000160199.10	ARNT	bHLH	ENSG00000143437.16	0.0105206	protein_coding	23.8486	13.5725	25.4699	protein_coding	6.08803	12.0409	6.80785
PKNOX1	ENSG00000160199.10	HIF1A	bHLH	ENSG00000100644.12	0.0104041	protein_coding	37.8509	193.534	125.593	protein_coding	6.08803	12.0409	6.80785
PKNOX1	ENSG00000160199.10	ZNF460	C2H2 ZF	ENSG00000197714.4	0.0103201	protein_coding	31.8465	67.1283	30.8887	protein_coding	6.08803	12.0409	6.80785
PKNOX1	ENSG00000160199.10	FOXN3	Forkhead	ENSG00000053254.11	0.00905169	protein_coding	27.663	22.1201	34.2645	protein_coding	6.08803	12.0409	6.80785
PKNOX1	ENSG00000160199.10	BACH1	bZIP	ENSG00000156273.11	0.012156	protein_coding	15.2362	29.6887	9.70708	protein_coding	6.08803	12.0409	6.80785
PKNOX1	ENSG00000160199.10	MAFK	bZIP	ENSG00000198517.5	0.00891068	protein_coding	7.86877	20.1437	11.0981	protein_coding	6.08803	12.0409	6.80785
PKNOX1	ENSG00000160199.10	IRF3	IRF	ENSG00000126456.11	0.0097357	protein_coding	26.1248	12.3178	23.4694	protein_coding	6.08803	12.0409	6.80785
PKNOX1	ENSG00000160199.10	ZBTB7B	C2H2 ZF	ENSG00000160685.9	0.00832461	protein_coding	24.438	20.102	65.1258	protein_coding	6.08803	12.0409	6.80785
PKNOX1	ENSG00000160199.10	ATF7	bZIP,C2H2 ZF	ENSG00000170653.14	0.0136376	protein_coding	12.0374	9.58847	13.0137	protein_coding	6.08803	12.0409	6.80785
HIC2	ENSG00000169635.5	SP3	C2H2 ZF	ENSG00000172845.9	0.0103937	protein_coding	25.2192	19.597	24.3094	protein_coding	6.41821	10.2589	5.99889
POU2F1	ENSG00000143190.17	ZBTB33	C2H2 ZF	ENSG00000177485.6	0.0180094	protein_coding	22.5466	20.7775	19.1706	protein_coding	9.52221	8.55693	8.63923
POU2F1	ENSG00000143190.17	ZNF148	NA	ENSG00000163848.14	0.0109442	protein_coding	16.9975	14.7542	13.1656	protein_coding	9.52221	8.55693	8.63923
POU2F1	ENSG00000143190.17	ETS1	Ets	ENSG00000134954.10	0.0101696	protein_coding	452.612	162.87	218.837	protein_coding	9.52221	8.55693	8.63923
POU2F1	ENSG00000143190.17	TCF12	bHLH	ENSG00000140262.13	0.00799379	protein_coding	17.2377	15.075	18.308	protein_coding	9.52221	8.55693	8.63923
POU2F1	ENSG00000143190.17	ARNTL	bHLH	ENSG00000133794.13	0.011103	protein_coding	14.2686	5.78231	4.69964	protein_coding	9.52221	8.55693	8.63923
POU2F1	ENSG00000143190.17	SP4	C2H2 ZF	ENSG00000105866.9	0.0136847	protein_coding	25.1884	15.9254	18.3065	protein_coding	9.52221	8.55693	8.63923
XBP1	ENSG00000100219.12	ZNF460	C2H2 ZF	ENSG00000197714.4	0.0109656	protein_coding	31.8465	67.1283	30.8887	protein_coding	53.3347	169.494	64.6697
XBP1	ENSG00000100219.12	TCF12	bHLH	ENSG00000140262.13	0.00905195	protein_coding	17.2377	15.075	18.308	protein_coding	53.3347	169.494	64.6697
XBP1	ENSG00000100219.12	AHR	bHLH	ENSG00000106546.8	0.0116362	protein_coding	9.41274	93.4629	53.6691	protein_coding	53.3347	169.494	64.6697
XBP1	ENSG00000100219.12	TCFL5	bHLH	ENSG00000101190.8	0.0105452	protein_coding	7.68045	6.17238	7.05429	protein_coding	53.3347	169.494	64.6697
XBP1	ENSG00000100219.12	IRF3	IRF	ENSG00000126456.11	0.00723934	protein_coding	26.1248	12.3178	23.4694	protein_coding	53.3347	169.494	64.6697
XBP1	ENSG00000100219.12	E2F6	E2F	ENSG00000169016.12	0.00948241	protein_coding	2.84755	10.2704	6.21233	protein_coding	53.3347	169.494	64.6697
XBP1	ENSG00000100219.12	SP2	C2H2 ZF	ENSG00000167182.11	0.0123006	protein_coding	34.5701	58.9216	43.343	protein_coding	53.3347	169.494	64.6697
XBP1	ENSG00000100219.12	GFI1	C2H2 ZF	ENSG00000162676.7	0.0112847	protein_coding	10.0452	202.356	83.9047	protein_coding	53.3347	169.494	64.6697
XBP1	ENSG00000100219.12	NFYA	CBF/NF-Y	ENSG00000001167.10	0.0075105	protein_coding	22.9157	43.4457	28.5316	protein_coding	53.3347	169.494	64.6697
XBP1	ENSG00000100219.12	NR2C2	Nuclear receptor	ENSG00000177463.11	0.00845371	protein_coding	25.6732	14.2385	18.4864	protein_coding	53.3347	169.494	64.6697
XBP1	ENSG00000100219.12	IRF9	IRF	ENSG00000213928.4	0.00762615	protein_coding	3.67368	6.92631	4.52713	protein_coding	53.3347	169.494	64.6697
XBP1	ENSG00000100219.12	ETS2	Ets	ENSG00000157557.7	0.00804803	protein_coding	7.37297	30.5099	26.3494	protein_coding	53.3347	169.494	64.6697
XBP1	ENSG00000100219.12	FOSL2	bZIP	ENSG00000075426.7	0.00786876	protein_coding	2.97949	68.8857	12.7455	protein_coding	53.3347	169.494	64.6697
XBP1	ENSG00000100219.12	IKZF1	C2H2 ZF	ENSG00000185811.12	0.0101246	protein_coding	140.55	182.375	130.244	protein_coding	53.3347	169.494	64.6697
XBP1	ENSG00000100219.12	FOXJ2	Forkhead	ENSG00000065970.4	0.0142631	protein_coding	22.3937	14.2572	23.246	protein_coding	53.3347	169.494	64.6697
XBP1	ENSG00000100219.12	MAFF	bZIP	ENSG00000185022.7	0.0107841	protein_coding	4.04945	8.48979	4.91597	protein_coding	53.3347	169.494	64.6697
POU2F1	ENSG00000143190.17	IRF7	IRF	ENSG00000185507.15	0.00912841	protein_coding	18.8744	15.4072	9.72413	protein_coding	9.52221	8.55693	8.63923
POU2F1	ENSG00000143190.17	JUNB	bZIP	ENSG00000171223.4	0.00861791	protein_coding	58.3256	189.229	176.615	protein_coding	9.52221	8.55693	8.63923
POU2F1	ENSG00000143190.17	BATF3	bZIP	ENSG00000123685.4	0.0145178	protein_coding	1.65811	41.5687	22.1585	protein_coding	9.52221	8.55693	8.63923
POU2F1	ENSG00000143190.17	REST	C2H2 ZF	ENSG00000084093.11	0.0125923	protein_coding	25.1333	21.3827	20.2767	protein_coding	9.52221	8.55693	8.63923
POU2F1	ENSG00000143190.17	STAT2	STAT	ENSG00000170581.9	0.00744366	protein_coding	37.0243	34.4988	24.7853	protein_coding	9.52221	8.55693	8.63923
POU2F1	ENSG00000143190.17	CREM	bZIP	ENSG00000095794.15	0.0114142	protein_coding	4.18751	35.9715	27.9649	protein_coding	9.52221	8.55693	8.63923
POU2F1	ENSG00000143190.17	VEZF1	C2H2 ZF	ENSG00000136451.4	0.00867036	protein_coding	35.7029	28.3574	20.778	protein_coding	9.52221	8.55693	8.63923
POU2F1	ENSG00000143190.17	MEF2A	MADS box	ENSG00000068305.13	0.00924849	protein_coding	17.5747	16.3968	11.6467	protein_coding	9.52221	8.55693	8.63923
POU2F1	ENSG00000143190.17	TEF	bZIP	ENSG00000167074.10	0.0086706	protein_coding	3.79114	5.07284	3.86223	protein_coding	9.52221	8.55693	8.63923
POU2F1	ENSG00000143190.17	ELF2	Ets	ENSG00000109381.15	0.0107542	protein_coding	15.8982	8.39304	7.75401	protein_coding	9.52221	8.55693	8.63923
MAFF	ENSG00000185022.7	CREB3	bZIP	ENSG00000107175.6	0.00957724	protein_coding	9.17368	6.9742	14.5769	protein_coding	4.04945	8.48979	4.91597
MAFF	ENSG00000185022.7	SP4	C2H2 ZF	ENSG00000105866.9	0.0125941	protein_coding	25.1884	15.9254	18.3065	protein_coding	4.04945	8.48979	4.91597
MAFF	ENSG00000185022.7	KLF6	C2H2 ZF	ENSG00000067082.10	0.0090026	protein_coding	20.002	29.0863	17.9519	protein_coding	4.04945	8.48979	4.91597
MAFF	ENSG00000185022.7	NR2C1	Nuclear receptor	ENSG00000120798.12	0.0134162	protein_coding	11.3642	5.96711	5.43842	protein_coding	4.04945	8.48979	4.91597
MAFF	ENSG00000185022.7	USF2	bHLH	ENSG00000105698.11	0.016743	protein_coding	40.5727	17.8351	31.9485	protein_coding	4.04945	8.48979	4.91597
MAFF	ENSG00000185022.7	ARNT	bHLH	ENSG00000143437.16	0.011114	protein_coding	23.8486	13.5725	25.4699	protein_coding	4.04945	8.48979	4.91597
MAFF	ENSG00000185022.7	JUNB	bZIP	ENSG00000171223.4	0.00882034	protein_coding	58.3256	189.229	176.615	protein_coding	4.04945	8.48979	4.91597
MAFF	ENSG00000185022.7	NFIX	SMAD	ENSG00000008441.12	0.00885727	protein_coding	4.02934	24.3211	14.9281	protein_coding	4.04945	8.48979	4.91597
MAFF	ENSG00000185022.7	NR1D1	Nuclear receptor	ENSG00000126368.5	0.00706437	protein_coding	19.4206	54.1854	31.3215	protein_coding	4.04945	8.48979	4.91597
MAFF	ENSG00000185022.7	ZBTB14	C2H2 ZF	ENSG00000198081.6	0.0112033	protein_coding	22.0902	8.83913	14.8651	protein_coding	4.04945	8.48979	4.91597
MAFF	ENSG00000185022.7	MSANTD3	MADF	ENSG00000066697.10	0.00763371	protein_coding	5.32575	3.26369	6.82814	protein_coding	4.04945	8.48979	4.91597
MAFF	ENSG00000185022.7	TCFL5	bHLH	ENSG00000101190.8	0.0116167	protein_coding	7.68045	6.17238	7.05429	protein_coding	4.04945	8.48979	4.91597
MAFF	ENSG00000185022.7	HIC2	C2H2 ZF	ENSG00000169635.5	0.0117011	protein_coding	6.41821	10.2589	5.99889	protein_coding	4.04945	8.48979	4.91597
MAFF	ENSG00000185022.7	KLF13	C2H2 ZF	ENSG00000169926.5	0.00844174	protein_coding	74.148	22.3999	42.3073	protein_coding	4.04945	8.48979	4.91597
ATF4	ENSG00000128272.10	JUND	bZIP	ENSG00000130522.4	0.0104718	protein_coding	74.3572	109.809	180.846	protein_coding	83.1187	333.068	339.627
ATF4	ENSG00000128272.10	BATF	bZIP	ENSG00000156127.6	0.00873644	protein_coding	5.33826	97.4656	88.5682	protein_coding	83.1187	333.068	339.627
ATF4	ENSG00000128272.10	BATF3	bZIP	ENSG00000123685.4	0.00796027	protein_coding	1.65811	41.5687	22.1585	protein_coding	83.1187	333.068	339.627
ATF4	ENSG00000128272.10	KLF3	C2H2 ZF	ENSG00000109787.8	0.00851712	protein_coding	125.276	30.3117	18.848	protein_coding	83.1187	333.068	339.627
ATF4	ENSG00000128272.10	KLF11	C2H2 ZF	ENSG00000172059.6	0.00769849	protein_coding	3.5389	6.49125	9.48579	protein_coding	83.1187	333.068	339.627
ATF4	ENSG00000128272.10	SREBF2	bHLH	ENSG00000198911.7	0.00796301	protein_coding	19.003	55.9017	56.7619	protein_coding	83.1187	333.068	339.627
ATF4	ENSG00000128272.10	ZNF652	C2H2 ZF	ENSG00000198740.4	0.00734732	protein_coding	24.2045	7.59965	3.95535	protein_coding	83.1187	333.068	339.627
ATF4	ENSG00000128272.10	PPARD	Nuclear receptor	ENSG00000112033.9	0.00958311	protein_coding	32.9083	14.8801	18.8092	protein_coding	83.1187	333.068	339.627
ATF4	ENSG00000128272.10	NFIX	SMAD	ENSG00000008441.12	0.00747533	protein_coding	4.02934	24.3211	14.9281	protein_coding	83.1187	333.068	339.627
ATF4	ENSG00000128272.10	RELA	Rel	ENSG00000173039.14	0.00835928	protein_coding	47.6368	71.7005	69.9761	protein_coding	83.1187	333.068	339.627
ATF4	ENSG00000128272.10	RARA	Nuclear receptor	ENSG00000131759.13	0.00878295	protein_coding	25.5426	71.9467	62.8849	protein_coding	83.1187	333.068	339.627
ATF4	ENSG00000128272.10	NR4A2	Nuclear receptor	ENSG00000153234.9	0.0072753	protein_coding	3.08795	132.95	51.2972	protein_coding	83.1187	333.068	339.627
ATF4	ENSG00000128272.10	STAT4	STAT	ENSG00000138378.13	0.00717771	protein_coding	36.264	65.4242	65.4886	protein_coding	83.1187	333.068	339.627
ATF4	ENSG00000128272.10	TFDP1	E2F	ENSG00000198176.8	0.01135	protein_coding	10.5546	23.5774	99.2647	protein_coding	83.1187	333.068	339.627
ATF4	ENSG00000128272.10	PRDM4	C2H2 ZF	ENSG00000110851.7	0.00968098	protein_coding	22.3441	36.1157	33.6699	protein_coding	83.1187	333.068	339.627
ATF4	ENSG00000128272.10	NFATC1	Rel	ENSG00000131196.13	0.00747432	protein_coding	26.5075	58.5079	62.1764	protein_coding	83.1187	333.068	339.627
ATF4	ENSG00000128272.10	CENPB	CENPB	ENSG00000125817.7	0.00975923	protein_coding	34.4666	56.3655	92.0614	protein_coding	83.1187	333.068	339.627
ATF4	ENSG00000128272.10	TFAP4	bHLH	ENSG00000090447.7	0.00811313	protein_coding	6.44111	12.8682	14.9109	protein_coding	83.1187	333.068	339.627
ATF4	ENSG00000128272.10	ZNF341	C2H2 ZF	ENSG00000131061.9	0.00767796	protein_coding	4.7502	6.20738	8.51451	protein_coding	83.1187	333.068	339.627
SREBF2	ENSG00000198911.7	GFI1	C2H2 ZF	ENSG00000162676.7	0.00768709	protein_coding	10.0452	202.356	83.9047	protein_coding	19.003	55.9017	56.7619
SREBF2	ENSG00000198911.7	POU2F2	Homeodomain,POU	ENSG00000028277.16	0.00785846	protein_coding	15.7518	74.8209	53.1713	protein_coding	19.003	55.9017	56.7619
SREBF2	ENSG00000198911.7	TFDP1	E2F	ENSG00000198176.8	0.00738369	protein_coding	10.5546	23.5774	99.2647	protein_coding	19.003	55.9017	56.7619
SREBF2	ENSG00000198911.7	ELK1	Ets	ENSG00000126767.13	0.00841469	protein_coding	18.6585	40.6808	59.8587	protein_coding	19.003	55.9017	56.7619
SREBF2	ENSG00000198911.7	PRDM15	NA	ENSG00000141956.9	0.00770604	protein_coding	4.15744	9.23077	6.49964	protein_coding	19.003	55.9017	56.7619
SREBF2	ENSG00000198911.7	RUNX3	Runt	ENSG00000020633.14	0.0074413	protein_coding	47.4684	73.1236	109.548	protein_coding	19.003	55.9017	56.7619
SREBF2	ENSG00000198911.7	ZBTB32	C2H2 ZF	ENSG00000011590.9	0.00898619	protein_coding	1.62528	8.92416	31.9888	protein_coding	19.003	55.9017	56.7619
SREBF2	ENSG00000198911.7	ARNTL	bHLH	ENSG00000133794.13	0.00769923	protein_coding	14.2686	5.78231	4.69964	protein_coding	19.003	55.9017	56.7619
SREBF2	ENSG00000198911.7	STAT1	STAT	ENSG00000115415.14	0.00901769	protein_coding	35.0834	445.774	430.889	protein_coding	19.003	55.9017	56.7619
SREBF2	ENSG00000198911.7	EGR2	C2H2 ZF	ENSG00000122877.9	0.0099596	protein_coding	2.12493	158.341	31.8664	protein_coding	19.003	55.9017	56.7619
SREBF2	ENSG00000198911.7	ZNF341	C2H2 ZF	ENSG00000131061.9	0.013714	protein_coding	4.7502	6.20738	8.51451	protein_coding	19.003	55.9017	56.7619
SREBF2	ENSG00000198911.7	FOXO1	Forkhead	ENSG00000150907.6	0.00769084	protein_coding	94.0816	55.3038	49.5386	protein_coding	19.003	55.9017	56.7619
POU2F1	ENSG00000143190.17	KLF12	C2H2 ZF	ENSG00000118922.12	0.00791477	protein_coding	53.6377	14.6764	9.57696	protein_coding	9.52221	8.55693	8.63923
POU2F1	ENSG00000143190.17	RARG	Nuclear receptor	ENSG00000172819.12	0.00995188	protein_coding	16.4433	7.00141	13.5178	protein_coding	9.52221	8.55693	8.63923
POU2F1	ENSG00000143190.17	PPARD	Nuclear receptor	ENSG00000112033.9	0.00706305	protein_coding	32.9083	14.8801	18.8092	protein_coding	9.52221	8.55693	8.63923
PPARA	ENSG00000186951.12	AHR	bHLH	ENSG00000106546.8	0.00719894	protein_coding	9.41274	93.4629	53.6691	protein_coding	5.8692	2.70244	4.58454
PPARA	ENSG00000186951.12	PBX3	Homeodomain	ENSG00000167081.12	0.0073306	protein_coding	9.21206	5.42354	5.54844	protein_coding	5.8692	2.70244	4.58454
PPARA	ENSG00000186951.12	ETS1	Ets	ENSG00000134954.10	0.00815015	protein_coding	452.612	162.87	218.837	protein_coding	5.8692	2.70244	4.58454
PPARA	ENSG00000186951.12	ZBTB14	C2H2 ZF	ENSG00000198081.6	0.0116087	protein_coding	22.0902	8.83913	14.8651	protein_coding	5.8692	2.70244	4.58454
PPARA	ENSG00000186951.12	SP2	C2H2 ZF	ENSG00000167182.11	0.00819529	protein_coding	34.5701	58.9216	43.343	protein_coding	5.8692	2.70244	4.58454
PPARA	ENSG00000186951.12	NFYA	CBF/NF-Y	ENSG00000001167.10	0.00803285	protein_coding	22.9157	43.4457	28.5316	protein_coding	5.8692	2.70244	4.58454
PPARA	ENSG00000186951.12	HIF1A	bHLH	ENSG00000100644.12	0.00750608	protein_coding	37.8509	193.534	125.593	protein_coding	5.8692	2.70244	4.58454
PPARA	ENSG00000186951.12	REL	Rel	ENSG00000162924.9	0.00763558	protein_coding	8.38764	216.888	56.7033	protein_coding	5.8692	2.70244	4.58454
BHLHE40	ENSG00000134107.4	ZNF341	C2H2 ZF	ENSG00000131061.9	0.0107051	protein_coding	4.7502	6.20738	8.51451	protein_coding	3.3031	86.0234	145.299
BHLHE40	ENSG00000134107.4	JUND	bZIP	ENSG00000130522.4	0.0075966	protein_coding	74.3572	109.809	180.846	protein_coding	3.3031	86.0234	145.299
BHLHE40	ENSG00000134107.4	TFAP4	bHLH	ENSG00000090447.7	0.00710532	protein_coding	6.44111	12.8682	14.9109	protein_coding	3.3031	86.0234	145.299
BHLHE40	ENSG00000134107.4	ELF1	Ets	ENSG00000120690.9	0.00854844	protein_coding	72.2458	77.2599	48.5997	protein_coding	3.3031	86.0234	145.299
BHLHE40	ENSG00000134107.4	ZBTB32	C2H2 ZF	ENSG00000011590.9	0.0124027	protein_coding	1.62528	8.92416	31.9888	protein_coding	3.3031	86.0234	145.299
BHLHE40	ENSG00000134107.4	ZNF740	C2H2 ZF	ENSG00000139651.9	0.00722395	protein_coding	30.1018	20.8814	16.9006	protein_coding	3.3031	86.0234	145.299
BHLHE40	ENSG00000134107.4	VDR	Nuclear receptor	ENSG00000111424.6	0.00767492	protein_coding	3.51623	9.31279	32.3455	protein_coding	3.3031	86.0234	145.299
BHLHE40	ENSG00000134107.4	FOXO1	Forkhead	ENSG00000150907.6	0.00888148	protein_coding	94.0816	55.3038	49.5386	protein_coding	3.3031	86.0234	145.299
BHLHE40	ENSG00000134107.4	NFE2L1	bZIP	ENSG00000082641.11	0.00750174	protein_coding	20.3803	36.5648	41.2383	protein_coding	3.3031	86.0234	145.299
BHLHE40	ENSG00000134107.4	NR4A1	Nuclear receptor	ENSG00000123358.15	0.00702134	protein_coding	1.8162	137.343	53.2826	protein_coding	3.3031	86.0234	145.299
BHLHE40	ENSG00000134107.4	ATF1	bZIP	ENSG00000123268.4	0.00705483	protein_coding	14.2756	30.5257	29.5574	protein_coding	3.3031	86.0234	145.299
BHLHE40	ENSG00000134107.4	ZNF148	NA	ENSG00000163848.14	0.00741974	protein_coding	16.9975	14.7542	13.1656	protein_coding	3.3031	86.0234	145.299
BHLHE40	ENSG00000134107.4	NR2F6	Nuclear receptor	ENSG00000160113.5	0.0191834	protein_coding	2.22949	6.45054	10.1467	protein_coding	3.3031	86.0234	145.299
BHLHE40	ENSG00000134107.4	CENPB	CENPB	ENSG00000125817.7	0.00933758	protein_coding	34.4666	56.3655	92.0614	protein_coding	3.3031	86.0234	145.299
BHLHE40	ENSG00000134107.4	NFYC	Unknown	ENSG00000066136.15	0.00735385	protein_coding	17.5252	24.9995	29.7307	protein_coding	3.3031	86.0234	145.299
NR2C2	ENSG00000177463.11	IRF1	IRF	ENSG00000125347.9	0.00719182	protein_coding	20.5275	150.134	102.101	protein_coding	25.6732	14.2385	18.4864
NR2C2	ENSG00000177463.11	RUNX3	Runt	ENSG00000020633.14	0.00833207	protein_coding	47.4684	73.1236	109.548	protein_coding	25.6732	14.2385	18.4864
NR2C2	ENSG00000177463.11	PPARD	Nuclear receptor	ENSG00000112033.9	0.012259	protein_coding	32.9083	14.8801	18.8092	protein_coding	25.6732	14.2385	18.4864
NR2C2	ENSG00000177463.11	BATF3	bZIP	ENSG00000123685.4	0.00742799	protein_coding	1.65811	41.5687	22.1585	protein_coding	25.6732	14.2385	18.4864
NR2C2	ENSG00000177463.11	TBX21	T-box	ENSG00000073861.2	0.00758035	protein_coding	2.92139	115.541	116.88	protein_coding	25.6732	14.2385	18.4864
NR2C2	ENSG00000177463.11	KLF16	C2H2 ZF	ENSG00000129911.4	0.00725393	protein_coding	11.7561	43.2471	45.3241	protein_coding	25.6732	14.2385	18.4864
NR2C2	ENSG00000177463.11	SP4	C2H2 ZF	ENSG00000105866.9	0.00816048	protein_coding	25.1884	15.9254	18.3065	protein_coding	25.6732	14.2385	18.4864
NR2C2	ENSG00000177463.11	KLF13	C2H2 ZF	ENSG00000169926.5	0.0084533	protein_coding	74.148	22.3999	42.3073	protein_coding	25.6732	14.2385	18.4864
NR2C2	ENSG00000177463.11	ETS1	Ets	ENSG00000134954.10	0.00714478	protein_coding	452.612	162.87	218.837	protein_coding	25.6732	14.2385	18.4864
NR2C2	ENSG00000177463.11	IRF4	IRF	ENSG00000137265.10	0.00805627	protein_coding	5.6988	783.89	464.786	protein_coding	25.6732	14.2385	18.4864
NR2C2	ENSG00000177463.11	TCF7	Sox	ENSG00000081059.15	0.00705189	protein_coding	224.006	63.0622	58.9134	protein_coding	25.6732	14.2385	18.4864
NR2C2	ENSG00000177463.11	PBX3	Homeodomain	ENSG00000167081.12	0.0106351	protein_coding	9.21206	5.42354	5.54844	protein_coding	25.6732	14.2385	18.4864
NR2C2	ENSG00000177463.11	CREM	bZIP	ENSG00000095794.15	0.00781344	protein_coding	4.18751	35.9715	27.9649	protein_coding	25.6732	14.2385	18.4864
EOMES	ENSG00000163508.8	ELF1	Ets	ENSG00000120690.9	0.0124662	protein_coding	72.2458	77.2599	48.5997	protein_coding	5.25807	7.21463	1.02112
EOMES	ENSG00000163508.8	MEF2A	MADS box	ENSG00000068305.13	0.0136187	protein_coding	17.5747	16.3968	11.6467	protein_coding	5.25807	7.21463	1.02112
EOMES	ENSG00000163508.8	JUN	bZIP	ENSG00000177606.5	0.0116196	protein_coding	7.94923	14.3257	6.56083	protein_coding	5.25807	7.21463	1.02112
EOMES	ENSG00000163508.8	NFIC	SMAD	ENSG00000141905.13	0.0206131	protein_coding	14.4289	14.8113	25.0569	protein_coding	5.25807	7.21463	1.02112
EOMES	ENSG00000163508.8	GATA3	GATA	ENSG00000107485.11	0.00748095	protein_coding	27.0461	22.0926	11.966	protein_coding	5.25807	7.21463	1.02112
EOMES	ENSG00000163508.8	CREB1	bZIP	ENSG00000118260.10	0.0158388	protein_coding	18.8661	20.8208	19.2312	protein_coding	5.25807	7.21463	1.02112
EOMES	ENSG00000163508.8	ZNF274	C2H2 ZF	ENSG00000171606.13	0.00938434	protein_coding	11.254	11.7971	7.18352	protein_coding	5.25807	7.21463	1.02112
EOMES	ENSG00000163508.8	NR3C1	Nuclear receptor	ENSG00000113580.10	0.0163258	protein_coding	34.8792	35.9849	17.06	protein_coding	5.25807	7.21463	1.02112
EOMES	ENSG00000163508.8	ZBTB7B	C2H2 ZF	ENSG00000160685.9	0.00786719	protein_coding	24.438	20.102	65.1258	protein_coding	5.25807	7.21463	1.02112
EOMES	ENSG00000163508.8	ZBTB7A	C2H2 ZF	ENSG00000178951.4	0.0122216	protein_coding	38.7343	36.0069	35.227	protein_coding	5.25807	7.21463	1.02112
EOMES	ENSG00000163508.8	THAP11	THAP finger	ENSG00000168286.1	0.0216016	protein_coding	44.1418	46.0762	84.2597	protein_coding	5.25807	7.21463	1.02112
EOMES	ENSG00000163508.8	ZBTB26	C2H2 ZF	ENSG00000171448.8	0.00910038	protein_coding	7.63083	7.51462	5.22584	protein_coding	5.25807	7.21463	1.02112
EOMES	ENSG00000163508.8	ZKSCAN1	C2H2 ZF	ENSG00000106261.12	0.0167639	protein_coding	29.63	31.1672	19.9696	protein_coding	5.25807	7.21463	1.02112
FOXP1	ENSG00000114861.14	GFI1	C2H2 ZF	ENSG00000162676.7	0.0083339	protein_coding	10.0452	202.356	83.9047	protein_coding	81.9274	148.688	90.0929
FOXP1	ENSG00000114861.14	CEBPG	bZIP	ENSG00000153879.4	0.00734963	protein_coding	9.95546	26.2151	15.8662	protein_coding	81.9274	148.688	90.0929
FOXP1	ENSG00000114861.14	REL	Rel	ENSG00000162924.9	0.0108981	protein_coding	8.38764	216.888	56.7033	protein_coding	81.9274	148.688	90.0929
FOXP1	ENSG00000114861.14	SMAD2	NA	ENSG00000175387.11	0.00864599	protein_coding	21.3528	16.7268	18.7465	protein_coding	81.9274	148.688	90.0929
FOXP1	ENSG00000114861.14	FOSL1	bZIP	ENSG00000175592.4	0.00726638	protein_coding	1.60479	151.689	60.6658	protein_coding	81.9274	148.688	90.0929
FOXP1	ENSG00000114861.14	FOSL2	bZIP	ENSG00000075426.7	0.00838793	protein_coding	2.97949	68.8857	12.7455	protein_coding	81.9274	148.688	90.0929
FOXP1	ENSG00000114861.14	SOX12	Sox	ENSG00000177732.6	0.00815919	protein_coding	11.96	7.80491	17.9188	protein_coding	81.9274	148.688	90.0929
FOXP1	ENSG00000114861.14	BACH1	bZIP	ENSG00000156273.11	0.00916432	protein_coding	15.2362	29.6887	9.70708	protein_coding	81.9274	148.688	90.0929
FOXP1	ENSG00000114861.14	FOS	bZIP	ENSG00000170345.5	0.00796541	protein_coding	2.22869	22.6799	3.04045	protein_coding	81.9274	148.688	90.0929
FOXP1	ENSG00000114861.14	FOXJ2	Forkhead	ENSG00000065970.4	0.0109083	protein_coding	22.3937	14.2572	23.246	protein_coding	81.9274	148.688	90.0929
FOXP1	ENSG00000114861.14	BACH2	bZIP	ENSG00000112182.10	0.0110291	protein_coding	49.8115	217.835	76.7515	protein_coding	81.9274	148.688	90.0929
FOXP1	ENSG00000114861.14	IRF3	IRF	ENSG00000126456.11	0.00851576	protein_coding	26.1248	12.3178	23.4694	protein_coding	81.9274	148.688	90.0929
FOXP1	ENSG00000114861.14	E2F6	E2F	ENSG00000169016.12	0.0103733	protein_coding	2.84755	10.2704	6.21233	protein_coding	81.9274	148.688	90.0929
FOXP1	ENSG00000114861.14	AHR	bHLH	ENSG00000106546.8	0.0110912	protein_coding	9.41274	93.4629	53.6691	protein_coding	81.9274	148.688	90.0929
FOXP1	ENSG00000114861.14	NFE2L2	bZIP	ENSG00000116044.11	0.00906168	protein_coding	43.1876	100.955	67.5731	protein_coding	81.9274	148.688	90.0929
FOXP1	ENSG00000114861.14	MAFK	bZIP	ENSG00000198517.5	0.0111482	protein_coding	7.86877	20.1437	11.0981	protein_coding	81.9274	148.688	90.0929
FOXP1	ENSG00000114861.14	ZNF263	C2H2 ZF	ENSG00000006194.6	0.00743479	protein_coding	13.8496	19.5448	8.63775	protein_coding	81.9274	148.688	90.0929
FOXP1	ENSG00000114861.14	KLF6	C2H2 ZF	ENSG00000067082.10	0.0138794	protein_coding	20.002	29.0863	17.9519	protein_coding	81.9274	148.688	90.0929
FOXP1	ENSG00000114861.14	EGR3	C2H2 ZF	ENSG00000179388.8	0.00932932	protein_coding	1.35095	132.127	45.4685	protein_coding	81.9274	148.688	90.0929
FOXP1	ENSG00000114861.14	ZNF281	C2H2 ZF	ENSG00000162702.7	0.00750706	protein_coding	19.3751	26.911	17.9295	protein_coding	81.9274	148.688	90.0929
FOXP1	ENSG00000114861.14	RREB1	C2H2 ZF	ENSG00000124782.15	0.00934213	protein_coding	16.4582	21.8455	9.185	protein_coding	81.9274	148.688	90.0929
FOXP1	ENSG00000114861.14	PPARA	Nuclear receptor	ENSG00000186951.12	0.00710892	protein_coding	5.8692	2.70244	4.58454	protein_coding	81.9274	148.688	90.0929
FOXP1	ENSG00000114861.14	NR4A1	Nuclear receptor	ENSG00000123358.15	0.00827221	protein_coding	1.8162	137.343	53.2826	protein_coding	81.9274	148.688	90.0929
FOXP1	ENSG00000114861.14	PRDM1	C2H2 ZF	ENSG00000057657.10	0.00875256	protein_coding	1.80343	5.61797	1.2626	protein_coding	81.9274	148.688	90.0929
FOXP1	ENSG00000114861.14	IRF9	IRF	ENSG00000213928.4	0.00842766	protein_coding	3.67368	6.92631	4.52713	protein_coding	81.9274	148.688	90.0929
FOXP1	ENSG00000114861.14	MAFG	bZIP	ENSG00000197063.6	0.00822363	protein_coding	5.59852	24.4516	19.1702	protein_coding	81.9274	148.688	90.0929
FOXP1	ENSG00000114861.14	ATF3	bZIP	ENSG00000162772.12	0.0118651	protein_coding	1.83901	12.5986	5.37156	protein_coding	81.9274	148.688	90.0929
FOXP1	ENSG00000114861.14	STAT5A	STAT	ENSG00000126561.12	0.0138628	protein_coding	36.4983	316.372	118.146	protein_coding	81.9274	148.688	90.0929
FOXP1	ENSG00000114861.14	FOXN3	Forkhead	ENSG00000053254.11	0.00703611	protein_coding	27.663	22.1201	34.2645	protein_coding	81.9274	148.688	90.0929
FOXP1	ENSG00000114861.14	NFATC2	Rel	ENSG00000101096.15	0.0125126	protein_coding	33.903	24.7075	33.2928	protein_coding	81.9274	148.688	90.0929
FOXP1	ENSG00000114861.14	ETV3	Ets	ENSG00000117036.7	0.00873068	protein_coding	12.9579	18.6252	12.707	protein_coding	81.9274	148.688	90.0929
FOXP1	ENSG00000114861.14	FOXK1	Forkhead	ENSG00000164916.9	0.0111438	protein_coding	29.2615	39.2605	34.7856	protein_coding	81.9274	148.688	90.0929
FOXP1	ENSG00000114861.14	PKNOX1	Homeodomain	ENSG00000160199.10	0.00991735	protein_coding	6.08803	12.0409	6.80785	protein_coding	81.9274	148.688	90.0929
FOXP1	ENSG00000114861.14	ZBTB14	C2H2 ZF	ENSG00000198081.6	0.00799081	protein_coding	22.0902	8.83913	14.8651	protein_coding	81.9274	148.688	90.0929
FOXP1	ENSG00000114861.14	ZNF460	C2H2 ZF	ENSG00000197714.4	0.011193	protein_coding	31.8465	67.1283	30.8887	protein_coding	81.9274	148.688	90.0929
FOXP1	ENSG00000114861.14	FOXJ3	Forkhead	ENSG00000198815.4	0.00885861	protein_coding	35.5573	47.1979	34.4884	protein_coding	81.9274	148.688	90.0929
FOXP1	ENSG00000114861.14	RELB	Rel	ENSG00000104856.9	0.00842622	protein_coding	8.90223	122.195	61.4806	protein_coding	81.9274	148.688	90.0929
FOXP1	ENSG00000114861.14	HLTF	NA	ENSG00000071794.11	0.00802916	protein_coding	10.3092	5.83055	9.54802	protein_coding	81.9274	148.688	90.0929
FOXP1	ENSG00000114861.14	NR1D1	Nuclear receptor	ENSG00000126368.5	0.00834376	protein_coding	19.4206	54.1854	31.3215	protein_coding	81.9274	148.688	90.0929
FOXP1	ENSG00000114861.14	NFYA	CBF/NF-Y	ENSG00000001167.10	0.0153278	protein_coding	22.9157	43.4457	28.5316	protein_coding	81.9274	148.688	90.0929
FOXP1	ENSG00000114861.14	ELK3	Ets	ENSG00000111145.3	0.00872639	protein_coding	28.9716	53.2809	27.9617	protein_coding	81.9274	148.688	90.0929
FOXP1	ENSG00000114861.14	XBP1	bZIP	ENSG00000100219.12	0.014324	protein_coding	53.3347	169.494	64.6697	protein_coding	81.9274	148.688	90.0929
FOXP1	ENSG00000114861.14	EGR2	C2H2 ZF	ENSG00000122877.9	0.00781338	protein_coding	2.12493	158.341	31.8664	protein_coding	81.9274	148.688	90.0929
ZNF148	ENSG00000163848.14	POU2F1	Homeodomain,POU	ENSG00000143190.17	0.0079255	protein_coding	9.52221	8.55693	8.63923	protein_coding	16.9975	14.7542	13.1656
ZNF148	ENSG00000163848.14	KLF3	C2H2 ZF	ENSG00000109787.8	0.00729237	protein_coding	125.276	30.3117	18.848	protein_coding	16.9975	14.7542	13.1656
ZNF148	ENSG00000163848.14	TFDP1	E2F	ENSG00000198176.8	0.0071886	protein_coding	10.5546	23.5774	99.2647	protein_coding	16.9975	14.7542	13.1656
ZNF148	ENSG00000163848.14	SMAD2	NA	ENSG00000175387.11	0.00928301	protein_coding	21.3528	16.7268	18.7465	protein_coding	16.9975	14.7542	13.1656
ZNF148	ENSG00000163848.14	MEF2A	MADS box	ENSG00000068305.13	0.00758929	protein_coding	17.5747	16.3968	11.6467	protein_coding	16.9975	14.7542	13.1656
ZNF148	ENSG00000163848.14	FOXK2	Forkhead	ENSG00000141568.15	0.00758458	protein_coding	14.4827	45.2678	41.1481	protein_coding	16.9975	14.7542	13.1656
ZNF148	ENSG00000163848.14	RELB	Rel	ENSG00000104856.9	0.0103312	protein_coding	8.90223	122.195	61.4806	protein_coding	16.9975	14.7542	13.1656
HLTF	ENSG00000071794.11	ZNF460	C2H2 ZF	ENSG00000197714.4	0.00915375	protein_coding	31.8465	67.1283	30.8887	protein_coding	10.3092	5.83055	9.54802
HLTF	ENSG00000071794.11	E2F6	E2F	ENSG00000169016.12	0.00768741	protein_coding	2.84755	10.2704	6.21233	protein_coding	10.3092	5.83055	9.54802
HLTF	ENSG00000071794.11	FOSL2	bZIP	ENSG00000075426.7	0.0140876	protein_coding	2.97949	68.8857	12.7455	protein_coding	10.3092	5.83055	9.54802
HLTF	ENSG00000071794.11	BACH1	bZIP	ENSG00000156273.11	0.011256	protein_coding	15.2362	29.6887	9.70708	protein_coding	10.3092	5.83055	9.54802
HLTF	ENSG00000071794.11	FOSB	bZIP	ENSG00000125740.9	0.00783634	protein_coding	1.38153	14.6115	1.57442	protein_coding	10.3092	5.83055	9.54802
HLTF	ENSG00000071794.11	ZBTB14	C2H2 ZF	ENSG00000198081.6	0.0121809	protein_coding	22.0902	8.83913	14.8651	protein_coding	10.3092	5.83055	9.54802
HLTF	ENSG00000071794.11	FOXN3	Forkhead	ENSG00000053254.11	0.0095614	protein_coding	27.663	22.1201	34.2645	protein_coding	10.3092	5.83055	9.54802
HLTF	ENSG00000071794.11	FOXJ2	Forkhead	ENSG00000065970.4	0.0142439	protein_coding	22.3937	14.2572	23.246	protein_coding	10.3092	5.83055	9.54802
HLTF	ENSG00000071794.11	RUNX1	Runt	ENSG00000159216.14	0.00763921	protein_coding	21.5738	25.8568	16.771	protein_coding	10.3092	5.83055	9.54802
HLTF	ENSG00000071794.11	ELK3	Ets	ENSG00000111145.3	0.00874906	protein_coding	28.9716	53.2809	27.9617	protein_coding	10.3092	5.83055	9.54802
HLTF	ENSG00000071794.11	ELF4	Ets	ENSG00000102034.12	0.00917362	protein_coding	26.4618	20.1657	33.0515	protein_coding	10.3092	5.83055	9.54802
HLTF	ENSG00000071794.11	ETV3	Ets	ENSG00000117036.7	0.00976436	protein_coding	12.9579	18.6252	12.707	protein_coding	10.3092	5.83055	9.54802
HLTF	ENSG00000071794.11	ELK4	Ets	ENSG00000158711.9	0.00707401	protein_coding	67.4856	107.039	70.1592	protein_coding	10.3092	5.83055	9.54802
HLTF	ENSG00000071794.11	CEBPG	bZIP	ENSG00000153879.4	0.00710227	protein_coding	9.95546	26.2151	15.8662	protein_coding	10.3092	5.83055	9.54802
BCL6	ENSG00000113916.13	ELF4	Ets	ENSG00000102034.12	0.0120249	protein_coding	26.4618	20.1657	33.0515	protein_coding	4.17339	18.1066	5.56979
BCL6	ENSG00000113916.13	IRF1	IRF	ENSG00000125347.9	0.0111869	protein_coding	20.5275	150.134	102.101	protein_coding	4.17339	18.1066	5.56979
BCL6	ENSG00000113916.13	FOSL1	bZIP	ENSG00000175592.4	0.00834384	protein_coding	1.60479	151.689	60.6658	protein_coding	4.17339	18.1066	5.56979
BCL6	ENSG00000113916.13	FOS	bZIP	ENSG00000170345.5	0.012681	protein_coding	2.22869	22.6799	3.04045	protein_coding	4.17339	18.1066	5.56979
BCL6	ENSG00000113916.13	FOSB	bZIP	ENSG00000125740.9	0.00745154	protein_coding	1.38153	14.6115	1.57442	protein_coding	4.17339	18.1066	5.56979
BCL6	ENSG00000113916.13	BACH2	bZIP	ENSG00000112182.10	0.0111756	protein_coding	49.8115	217.835	76.7515	protein_coding	4.17339	18.1066	5.56979
BCL6	ENSG00000113916.13	PRDM1	C2H2 ZF	ENSG00000057657.10	0.0111792	protein_coding	1.80343	5.61797	1.2626	protein_coding	4.17339	18.1066	5.56979
BCL6	ENSG00000113916.13	FOXN3	Forkhead	ENSG00000053254.11	0.00921783	protein_coding	27.663	22.1201	34.2645	protein_coding	4.17339	18.1066	5.56979
BCL6	ENSG00000113916.13	EGR2	C2H2 ZF	ENSG00000122877.9	0.0123806	protein_coding	2.12493	158.341	31.8664	protein_coding	4.17339	18.1066	5.56979
BCL6	ENSG00000113916.13	KLF9	C2H2 ZF	ENSG00000119138.3	0.0105126	protein_coding	14.7466	42.3805	19.3454	protein_coding	4.17339	18.1066	5.56979
BCL6	ENSG00000113916.13	EGR3	C2H2 ZF	ENSG00000179388.8	0.0112456	protein_coding	1.35095	132.127	45.4685	protein_coding	4.17339	18.1066	5.56979
BCL6	ENSG00000113916.13	RREB1	C2H2 ZF	ENSG00000124782.15	0.00785674	protein_coding	16.4582	21.8455	9.185	protein_coding	4.17339	18.1066	5.56979
BCL6	ENSG00000113916.13	NR4A1	Nuclear receptor	ENSG00000123358.15	0.00925585	protein_coding	1.8162	137.343	53.2826	protein_coding	4.17339	18.1066	5.56979
BCL6	ENSG00000113916.13	ZBTB6	C2H2 ZF	ENSG00000186130.4	0.00901308	protein_coding	14.1741	21.0704	12.5025	protein_coding	4.17339	18.1066	5.56979
BCL6	ENSG00000113916.13	PRDM15	NA	ENSG00000141956.9	0.00795376	protein_coding	4.15744	9.23077	6.49964	protein_coding	4.17339	18.1066	5.56979
BCL6	ENSG00000113916.13	REL	Rel	ENSG00000162924.9	0.00751286	protein_coding	8.38764	216.888	56.7033	protein_coding	4.17339	18.1066	5.56979
BCL6	ENSG00000113916.13	ZNF281	C2H2 ZF	ENSG00000162702.7	0.00914686	protein_coding	19.3751	26.911	17.9295	protein_coding	4.17339	18.1066	5.56979
BCL6	ENSG00000113916.13	MGA	bHLH,T-box	ENSG00000174197.12	0.00747607	protein_coding	21.4715	52.8379	27.0435	protein_coding	4.17339	18.1066	5.56979
BCL6	ENSG00000113916.13	SOX12	Sox	ENSG00000177732.6	0.0101926	protein_coding	11.96	7.80491	17.9188	protein_coding	4.17339	18.1066	5.56979
BCL6	ENSG00000113916.13	E2F6	E2F	ENSG00000169016.12	0.0137786	protein_coding	2.84755	10.2704	6.21233	protein_coding	4.17339	18.1066	5.56979
BCL6	ENSG00000113916.13	ZNF460	C2H2 ZF	ENSG00000197714.4	0.00765733	protein_coding	31.8465	67.1283	30.8887	protein_coding	4.17339	18.1066	5.56979
BCL6	ENSG00000113916.13	KLF6	C2H2 ZF	ENSG00000067082.10	0.0105912	protein_coding	20.002	29.0863	17.9519	protein_coding	4.17339	18.1066	5.56979
BCL6	ENSG00000113916.13	KLF10	C2H2 ZF	ENSG00000155090.10	0.00887836	protein_coding	2.98347	101.32	25.2161	protein_coding	4.17339	18.1066	5.56979
BCL6	ENSG00000113916.13	BACH1	bZIP	ENSG00000156273.11	0.0143197	protein_coding	15.2362	29.6887	9.70708	protein_coding	4.17339	18.1066	5.56979
BCL6	ENSG00000113916.13	CTCF	C2H2 ZF	ENSG00000102974.10	0.00759958	protein_coding	50.6801	45.7903	69.2994	protein_coding	4.17339	18.1066	5.56979
BCL6	ENSG00000113916.13	ARNT	bHLH	ENSG00000143437.16	0.00750542	protein_coding	23.8486	13.5725	25.4699	protein_coding	4.17339	18.1066	5.56979
BCL6	ENSG00000113916.13	DDIT3	bZIP	ENSG00000175197.6	0.00999218	protein_coding	12.2974	35.3201	14.9946	protein_coding	4.17339	18.1066	5.56979
BCL6	ENSG00000113916.13	USF1	bHLH	ENSG00000158773.10	0.00752039	protein_coding	34.2107	23.7808	35.5404	protein_coding	4.17339	18.1066	5.56979
BCL6	ENSG00000113916.13	NR1D1	Nuclear receptor	ENSG00000126368.5	0.00746493	protein_coding	19.4206	54.1854	31.3215	protein_coding	4.17339	18.1066	5.56979
BCL6	ENSG00000113916.13	ZNF24	C2H2 ZF	ENSG00000172466.11	0.0101113	protein_coding	24.04	36.803	22.5491	protein_coding	4.17339	18.1066	5.56979
BCL6	ENSG00000113916.13	MAFK	bZIP	ENSG00000198517.5	0.0114054	protein_coding	7.86877	20.1437	11.0981	protein_coding	4.17339	18.1066	5.56979
BCL6	ENSG00000113916.13	MAFF	bZIP	ENSG00000185022.7	0.00791341	protein_coding	4.04945	8.48979	4.91597	protein_coding	4.17339	18.1066	5.56979
BCL6	ENSG00000113916.13	FOXJ2	Forkhead	ENSG00000065970.4	0.00878102	protein_coding	22.3937	14.2572	23.246	protein_coding	4.17339	18.1066	5.56979
BCL6	ENSG00000113916.13	ATF7	bZIP,C2H2 ZF	ENSG00000170653.14	0.00815495	protein_coding	12.0374	9.58847	13.0137	protein_coding	4.17339	18.1066	5.56979
BCL6	ENSG00000113916.13	CEBPG	bZIP	ENSG00000153879.4	0.0116559	protein_coding	9.95546	26.2151	15.8662	protein_coding	4.17339	18.1066	5.56979
BCL6	ENSG00000113916.13	IRF2	IRF	ENSG00000168310.6	0.0101307	protein_coding	38.8138	22.4929	43.0542	protein_coding	4.17339	18.1066	5.56979
BCL6	ENSG00000113916.13	KLF13	C2H2 ZF	ENSG00000169926.5	0.00889437	protein_coding	74.148	22.3999	42.3073	protein_coding	4.17339	18.1066	5.56979
BCL6	ENSG00000113916.13	HIC2	C2H2 ZF	ENSG00000169635.5	0.0105118	protein_coding	6.41821	10.2589	5.99889	protein_coding	4.17339	18.1066	5.56979
BCL6	ENSG00000113916.13	HLTF	NA	ENSG00000071794.11	0.0111685	protein_coding	10.3092	5.83055	9.54802	protein_coding	4.17339	18.1066	5.56979
BCL6	ENSG00000113916.13	LIN54	TCR/CxC	ENSG00000189308.6	0.00792459	protein_coding	8.21127	3.97463	10.4772	protein_coding	4.17339	18.1066	5.56979
BCL6	ENSG00000113916.13	RFX1	RFX	ENSG00000132005.4	0.00817746	protein_coding	12.2825	7.71665	10.0227	protein_coding	4.17339	18.1066	5.56979
BCL6	ENSG00000113916.13	TGIF1	Homeodomain	ENSG00000177426.16	0.00751698	protein_coding	11.7375	22.7534	3.25931	protein_coding	4.17339	18.1066	5.56979
BCL6	ENSG00000113916.13	NFYA	CBF/NF-Y	ENSG00000001167.10	0.0105795	protein_coding	22.9157	43.4457	28.5316	protein_coding	4.17339	18.1066	5.56979
BCL6	ENSG00000113916.13	FOXP1	Forkhead	ENSG00000114861.14	0.00999011	protein_coding	81.9274	148.688	90.0929	protein_coding	4.17339	18.1066	5.56979
RBPJ	ENSG00000168214.16	E2F6	E2F	ENSG00000169016.12	0.00748664	protein_coding	2.84755	10.2704	6.21233	protein_coding	15.4007	45.7294	34.203
RBPJ	ENSG00000168214.16	FOSB	bZIP	ENSG00000125740.9	0.00988725	protein_coding	1.38153	14.6115	1.57442	protein_coding	15.4007	45.7294	34.203
RBPJ	ENSG00000168214.16	HIC2	C2H2 ZF	ENSG00000169635.5	0.00979094	protein_coding	6.41821	10.2589	5.99889	protein_coding	15.4007	45.7294	34.203
RBPJ	ENSG00000168214.16	EGR2	C2H2 ZF	ENSG00000122877.9	0.0190681	protein_coding	2.12493	158.341	31.8664	protein_coding	15.4007	45.7294	34.203
RBPJ	ENSG00000168214.16	EGR1	C2H2 ZF	ENSG00000120738.7	0.00873754	protein_coding	2.10936	136.228	76.4968	protein_coding	15.4007	45.7294	34.203
RBPJ	ENSG00000168214.16	EGR3	C2H2 ZF	ENSG00000179388.8	0.00772432	protein_coding	1.35095	132.127	45.4685	protein_coding	15.4007	45.7294	34.203
RBPJ	ENSG00000168214.16	ZBTB14	C2H2 ZF	ENSG00000198081.6	0.00980731	protein_coding	22.0902	8.83913	14.8651	protein_coding	15.4007	45.7294	34.203
RBPJ	ENSG00000168214.16	ATF6	bZIP	ENSG00000118217.5	0.00809623	protein_coding	19.9684	36.1725	26.3982	protein_coding	15.4007	45.7294	34.203
RBPJ	ENSG00000168214.16	MYB	Myb/SANT	ENSG00000118513.14	0.00850456	protein_coding	8.9003	38.6206	20.9037	protein_coding	15.4007	45.7294	34.203
RBPJ	ENSG00000168214.16	KLF10	C2H2 ZF	ENSG00000155090.10	0.0113844	protein_coding	2.98347	101.32	25.2161	protein_coding	15.4007	45.7294	34.203
RBPJ	ENSG00000168214.16	RELB	Rel	ENSG00000104856.9	0.00792281	protein_coding	8.90223	122.195	61.4806	protein_coding	15.4007	45.7294	34.203
RBPJ	ENSG00000168214.16	IRF3	IRF	ENSG00000126456.11	0.00927948	protein_coding	26.1248	12.3178	23.4694	protein_coding	15.4007	45.7294	34.203
RBPJ	ENSG00000168214.16	LEF1	Sox	ENSG00000138795.5	0.00715081	protein_coding	364.591	202.089	280.925	protein_coding	15.4007	45.7294	34.203
RBPJ	ENSG00000168214.16	IRF4	IRF	ENSG00000137265.10	0.00869826	protein_coding	5.6988	783.89	464.786	protein_coding	15.4007	45.7294	34.203
RBPJ	ENSG00000168214.16	IRF1	IRF	ENSG00000125347.9	0.00975862	protein_coding	20.5275	150.134	102.101	protein_coding	15.4007	45.7294	34.203
RBPJ	ENSG00000168214.16	FOSL1	bZIP	ENSG00000175592.4	0.0111128	protein_coding	1.60479	151.689	60.6658	protein_coding	15.4007	45.7294	34.203
RBPJ	ENSG00000168214.16	HOXB2	Homeodomain	ENSG00000173917.9	0.00795688	protein_coding	12.5784	5.49332	7.7556	protein_coding	15.4007	45.7294	34.203
RBPJ	ENSG00000168214.16	PKNOX1	Homeodomain	ENSG00000160199.10	0.00932337	protein_coding	6.08803	12.0409	6.80785	protein_coding	15.4007	45.7294	34.203
RBPJ	ENSG00000168214.16	FOS	bZIP	ENSG00000170345.5	0.012357	protein_coding	2.22869	22.6799	3.04045	protein_coding	15.4007	45.7294	34.203
RBPJ	ENSG00000168214.16	AHR	bHLH	ENSG00000106546.8	0.018226	protein_coding	9.41274	93.4629	53.6691	protein_coding	15.4007	45.7294	34.203
RBPJ	ENSG00000168214.16	NFKB1	Rel	ENSG00000109320.7	0.00750877	protein_coding	29.1567	506.789	296.345	protein_coding	15.4007	45.7294	34.203
RBPJ	ENSG00000168214.16	RARA	Nuclear receptor	ENSG00000131759.13	0.0082931	protein_coding	25.5426	71.9467	62.8849	protein_coding	15.4007	45.7294	34.203
RBPJ	ENSG00000168214.16	RFX1	RFX	ENSG00000132005.4	0.00806004	protein_coding	12.2825	7.71665	10.0227	protein_coding	15.4007	45.7294	34.203
RBPJ	ENSG00000168214.16	FOXK1	Forkhead	ENSG00000164916.9	0.010099	protein_coding	29.2615	39.2605	34.7856	protein_coding	15.4007	45.7294	34.203
RBPJ	ENSG00000168214.16	FOXP1	Forkhead	ENSG00000114861.14	0.00802974	protein_coding	81.9274	148.688	90.0929	protein_coding	15.4007	45.7294	34.203
RBPJ	ENSG00000168214.16	NR4A1	Nuclear receptor	ENSG00000123358.15	0.0109067	protein_coding	1.8162	137.343	53.2826	protein_coding	15.4007	45.7294	34.203
RBPJ	ENSG00000168214.16	KLF13	C2H2 ZF	ENSG00000169926.5	0.0126874	protein_coding	74.148	22.3999	42.3073	protein_coding	15.4007	45.7294	34.203
RBPJ	ENSG00000168214.16	REL	Rel	ENSG00000162924.9	0.0110385	protein_coding	8.38764	216.888	56.7033	protein_coding	15.4007	45.7294	34.203
RBPJ	ENSG00000168214.16	BACH2	bZIP	ENSG00000112182.10	0.0112955	protein_coding	49.8115	217.835	76.7515	protein_coding	15.4007	45.7294	34.203
RBPJ	ENSG00000168214.16	USF2	bHLH	ENSG00000105698.11	0.00871094	protein_coding	40.5727	17.8351	31.9485	protein_coding	15.4007	45.7294	34.203
RBPJ	ENSG00000168214.16	MGA	bHLH,T-box	ENSG00000174197.12	0.00714952	protein_coding	21.4715	52.8379	27.0435	protein_coding	15.4007	45.7294	34.203
RBPJ	ENSG00000168214.16	MAFG	bZIP	ENSG00000197063.6	0.0118856	protein_coding	5.59852	24.4516	19.1702	protein_coding	15.4007	45.7294	34.203
RBPJ	ENSG00000168214.16	DDIT3	bZIP	ENSG00000175197.6	0.0195771	protein_coding	12.2974	35.3201	14.9946	protein_coding	15.4007	45.7294	34.203
KLF3	ENSG00000109787.8	TGIF2	Homeodomain	ENSG00000118707.5	0.00977845	protein_coding	18.8919	43.0823	46.8952	protein_coding	125.276	30.3117	18.848
KLF3	ENSG00000109787.8	NR2C2	Nuclear receptor	ENSG00000177463.11	0.0091802	protein_coding	25.6732	14.2385	18.4864	protein_coding	125.276	30.3117	18.848
KLF3	ENSG00000109787.8	MAZ	C2H2 ZF	ENSG00000103495.9	0.00757389	protein_coding	71.6034	91.0371	189.127	protein_coding	125.276	30.3117	18.848
KLF3	ENSG00000109787.8	KLF2	C2H2 ZF	ENSG00000127528.5	0.00720773	protein_coding	643.228	77.5309	3.57086	protein_coding	125.276	30.3117	18.848
KLF3	ENSG00000109787.8	STAT1	STAT	ENSG00000115415.14	0.0101437	protein_coding	35.0834	445.774	430.889	protein_coding	125.276	30.3117	18.848
KLF3	ENSG00000109787.8	JUNB	bZIP	ENSG00000171223.4	0.00820226	protein_coding	58.3256	189.229	176.615	protein_coding	125.276	30.3117	18.848
KLF3	ENSG00000109787.8	JUND	bZIP	ENSG00000130522.4	0.00820833	protein_coding	74.3572	109.809	180.846	protein_coding	125.276	30.3117	18.848
KLF3	ENSG00000109787.8	FLI1	Ets	ENSG00000151702.12	0.00838624	protein_coding	25.0796	8.22835	13.354	protein_coding	125.276	30.3117	18.848
KLF3	ENSG00000109787.8	FOXO1	Forkhead	ENSG00000150907.6	0.00793691	protein_coding	94.0816	55.3038	49.5386	protein_coding	125.276	30.3117	18.848
KLF3	ENSG00000109787.8	MXI1	bHLH	ENSG00000119950.16	0.00822352	protein_coding	28.7737	21.687	11.6316	protein_coding	125.276	30.3117	18.848
KLF3	ENSG00000109787.8	NR1D1	Nuclear receptor	ENSG00000126368.5	0.00833109	protein_coding	19.4206	54.1854	31.3215	protein_coding	125.276	30.3117	18.848
KLF3	ENSG00000109787.8	ATF3	bZIP	ENSG00000162772.12	0.0090316	protein_coding	1.83901	12.5986	5.37156	protein_coding	125.276	30.3117	18.848
KLF3	ENSG00000109787.8	DBP	bZIP	ENSG00000105516.6	0.010714	protein_coding	18.4998	3.52932	4.50829	protein_coding	125.276	30.3117	18.848
KLF3	ENSG00000109787.8	ZBTB18	C2H2 ZF	ENSG00000179456.9	0.0120945	protein_coding	104.724	28.3132	11.2869	protein_coding	125.276	30.3117	18.848
KLF3	ENSG00000109787.8	ZNF449	C2H2 ZF	ENSG00000173275.8	0.00941262	protein_coding	5.83095	1.93546	1.12909	protein_coding	125.276	30.3117	18.848
KLF3	ENSG00000109787.8	NFE2L1	bZIP	ENSG00000082641.11	0.00835116	protein_coding	20.3803	36.5648	41.2383	protein_coding	125.276	30.3117	18.848
KLF3	ENSG00000109787.8	PBX2	Homeodomain	ENSG00000204304.7	0.00971305	protein_coding	31.7444	13.5005	19.866	protein_coding	125.276	30.3117	18.848
KLF3	ENSG00000109787.8	ZBTB32	C2H2 ZF	ENSG00000011590.9	0.00811984	protein_coding	1.62528	8.92416	31.9888	protein_coding	125.276	30.3117	18.848
KLF3	ENSG00000109787.8	CEBPG	bZIP	ENSG00000153879.4	0.0101996	protein_coding	9.95546	26.2151	15.8662	protein_coding	125.276	30.3117	18.848
KLF3	ENSG00000109787.8	ATF4	bZIP	ENSG00000128272.10	0.00897544	protein_coding	83.1187	333.068	339.627	protein_coding	125.276	30.3117	18.848
KLF3	ENSG00000109787.8	CLOCK	bHLH	ENSG00000134852.10	0.00720295	protein_coding	6.07677	11.1627	10.8958	protein_coding	125.276	30.3117	18.848
KLF3	ENSG00000109787.8	ZNF354C	C2H2 ZF	ENSG00000177932.6	0.00715394	protein_coding	8.44028	6.87653	5.68326	protein_coding	125.276	30.3117	18.848
KLF3	ENSG00000109787.8	MYC	bHLH	ENSG00000136997.10	0.0113039	protein_coding	102.767	1095.75	648.817	protein_coding	125.276	30.3117	18.848
REST	ENSG00000084093.11	ZNF148	NA	ENSG00000163848.14	0.00942959	protein_coding	16.9975	14.7542	13.1656	protein_coding	25.1333	21.3827	20.2767
REST	ENSG00000084093.11	POU2F1	Homeodomain,POU	ENSG00000143190.17	0.0126001	protein_coding	9.52221	8.55693	8.63923	protein_coding	25.1333	21.3827	20.2767
REST	ENSG00000084093.11	NFIC	SMAD	ENSG00000141905.13	0.011688	protein_coding	14.4289	14.8113	25.0569	protein_coding	25.1333	21.3827	20.2767
REST	ENSG00000084093.11	MEF2D	MADS box	ENSG00000116604.13	0.00751166	protein_coding	36.798	25.1847	25.5343	protein_coding	25.1333	21.3827	20.2767
REST	ENSG00000084093.11	MEF2A	MADS box	ENSG00000068305.13	0.0076063	protein_coding	17.5747	16.3968	11.6467	protein_coding	25.1333	21.3827	20.2767
REST	ENSG00000084093.11	RFX3	RFX	ENSG00000080298.11	0.00843915	protein_coding	8.42273	4.67247	4.49608	protein_coding	25.1333	21.3827	20.2767
REST	ENSG00000084093.11	RUNX2	Runt	ENSG00000124813.16	0.0135053	protein_coding	6.0333	2.90249	1.44631	protein_coding	25.1333	21.3827	20.2767
REST	ENSG00000084093.11	ZBTB33	C2H2 ZF	ENSG00000177485.6	0.00728916	protein_coding	22.5466	20.7775	19.1706	protein_coding	25.1333	21.3827	20.2767
CLOCK	ENSG00000134852.10	ZNF282	C2H2 ZF	ENSG00000170265.7	0.00781731	protein_coding	10.0338	13.1235	24.7383	protein_coding	6.07677	11.1627	10.8958
REST	ENSG00000084093.11	NR2C1	Nuclear receptor	ENSG00000120798.12	0.0114139	protein_coding	11.3642	5.96711	5.43842	protein_coding	25.1333	21.3827	20.2767
CLOCK	ENSG00000134852.10	NFIX	SMAD	ENSG00000008441.12	0.0074404	protein_coding	4.02934	24.3211	14.9281	protein_coding	6.07677	11.1627	10.8958
CLOCK	ENSG00000134852.10	ERF	Ets	ENSG00000105722.5	0.00744966	protein_coding	16.4224	54.4922	63.5516	protein_coding	6.07677	11.1627	10.8958
CLOCK	ENSG00000134852.10	ELF2	Ets	ENSG00000109381.15	0.00769725	protein_coding	15.8982	8.39304	7.75401	protein_coding	6.07677	11.1627	10.8958
REST	ENSG00000084093.11	FOSL1	bZIP	ENSG00000175592.4	0.00756227	protein_coding	1.60479	151.689	60.6658	protein_coding	25.1333	21.3827	20.2767
REST	ENSG00000084093.11	THAP11	THAP finger	ENSG00000168286.1	0.00700391	protein_coding	44.1418	46.0762	84.2597	protein_coding	25.1333	21.3827	20.2767
REST	ENSG00000084093.11	ZEB1	C2H2 ZF,Homeodomain	ENSG00000148516.17	0.00891141	protein_coding	30.5601	27.0703	15.1315	protein_coding	25.1333	21.3827	20.2767
REST	ENSG00000084093.11	ZNF528	C2H2 ZF	ENSG00000167555.9	0.00980952	protein_coding	6.29283	4.82699	1.29655	protein_coding	25.1333	21.3827	20.2767
CLOCK	ENSG00000134852.10	SNAI3	C2H2 ZF	ENSG00000185669.5	0.00728765	protein_coding	7.15207	2.50655	4.45566	protein_coding	6.07677	11.1627	10.8958
CLOCK	ENSG00000134852.10	ZNF449	C2H2 ZF	ENSG00000173275.8	0.00772011	protein_coding	5.83095	1.93546	1.12909	protein_coding	6.07677	11.1627	10.8958
LIN54	ENSG00000189308.6	IRF1	IRF	ENSG00000125347.9	0.00886148	protein_coding	20.5275	150.134	102.101	protein_coding	8.21127	3.97463	10.4772
LIN54	ENSG00000189308.6	EGR2	C2H2 ZF	ENSG00000122877.9	0.00978487	protein_coding	2.12493	158.341	31.8664	protein_coding	8.21127	3.97463	10.4772
LIN54	ENSG00000189308.6	ZNF263	C2H2 ZF	ENSG00000006194.6	0.00737767	protein_coding	13.8496	19.5448	8.63775	protein_coding	8.21127	3.97463	10.4772
LIN54	ENSG00000189308.6	AHR	bHLH	ENSG00000106546.8	0.00781059	protein_coding	9.41274	93.4629	53.6691	protein_coding	8.21127	3.97463	10.4772
LIN54	ENSG00000189308.6	NRF1	Unknown	ENSG00000106459.10	0.00777611	protein_coding	12.1101	19.1807	7.90798	protein_coding	8.21127	3.97463	10.4772
LIN54	ENSG00000189308.6	CTCF	C2H2 ZF	ENSG00000102974.10	0.00871016	protein_coding	50.6801	45.7903	69.2994	protein_coding	8.21127	3.97463	10.4772
LIN54	ENSG00000189308.6	KLF10	C2H2 ZF	ENSG00000155090.10	0.00754283	protein_coding	2.98347	101.32	25.2161	protein_coding	8.21127	3.97463	10.4772
LIN54	ENSG00000189308.6	MNT	bHLH	ENSG00000070444.10	0.0102732	protein_coding	13.6034	20.317	11.22	protein_coding	8.21127	3.97463	10.4772
LIN54	ENSG00000189308.6	RUNX1	Runt	ENSG00000159216.14	0.00931363	protein_coding	21.5738	25.8568	16.771	protein_coding	8.21127	3.97463	10.4772
LIN54	ENSG00000189308.6	FOXK1	Forkhead	ENSG00000164916.9	0.00814243	protein_coding	29.2615	39.2605	34.7856	protein_coding	8.21127	3.97463	10.4772
LIN54	ENSG00000189308.6	ELF4	Ets	ENSG00000102034.12	0.0125455	protein_coding	26.4618	20.1657	33.0515	protein_coding	8.21127	3.97463	10.4772
LIN54	ENSG00000189308.6	NFYA	CBF/NF-Y	ENSG00000001167.10	0.00899531	protein_coding	22.9157	43.4457	28.5316	protein_coding	8.21127	3.97463	10.4772
LIN54	ENSG00000189308.6	FOXN3	Forkhead	ENSG00000053254.11	0.0159295	protein_coding	27.663	22.1201	34.2645	protein_coding	8.21127	3.97463	10.4772
LIN54	ENSG00000189308.6	FOXJ2	Forkhead	ENSG00000065970.4	0.0071724	protein_coding	22.3937	14.2572	23.246	protein_coding	8.21127	3.97463	10.4772
NFKB1	ENSG00000109320.7	SP4	C2H2 ZF	ENSG00000105866.9	0.00933704	protein_coding	25.1884	15.9254	18.3065	protein_coding	29.1567	506.789	296.345
NFKB1	ENSG00000109320.7	JUNB	bZIP	ENSG00000171223.4	0.00782163	protein_coding	58.3256	189.229	176.615	protein_coding	29.1567	506.789	296.345
NFKB1	ENSG00000109320.7	RFX1	RFX	ENSG00000132005.4	0.00702552	protein_coding	12.2825	7.71665	10.0227	protein_coding	29.1567	506.789	296.345
NFKB1	ENSG00000109320.7	FOSL1	bZIP	ENSG00000175592.4	0.0121348	protein_coding	1.60479	151.689	60.6658	protein_coding	29.1567	506.789	296.345
NFKB1	ENSG00000109320.7	NR2C2	Nuclear receptor	ENSG00000177463.11	0.00720936	protein_coding	25.6732	14.2385	18.4864	protein_coding	29.1567	506.789	296.345
NFKB1	ENSG00000109320.7	SP2	C2H2 ZF	ENSG00000167182.11	0.00923358	protein_coding	34.5701	58.9216	43.343	protein_coding	29.1567	506.789	296.345
NFKB1	ENSG00000109320.7	LEF1	Sox	ENSG00000138795.5	0.00875403	protein_coding	364.591	202.089	280.925	protein_coding	29.1567	506.789	296.345
NFKB1	ENSG00000109320.7	NR4A1	Nuclear receptor	ENSG00000123358.15	0.00723591	protein_coding	1.8162	137.343	53.2826	protein_coding	29.1567	506.789	296.345
NFKB1	ENSG00000109320.7	MYC	bHLH	ENSG00000136997.10	0.0110004	protein_coding	102.767	1095.75	648.817	protein_coding	29.1567	506.789	296.345
NFKB1	ENSG00000109320.7	SNAI1	C2H2 ZF	ENSG00000124216.3	0.00814017	protein_coding	1.30754	8.60721	3.42322	protein_coding	29.1567	506.789	296.345
NFKB1	ENSG00000109320.7	SNAI3	C2H2 ZF	ENSG00000185669.5	0.00821095	protein_coding	7.15207	2.50655	4.45566	protein_coding	29.1567	506.789	296.345
NFKB1	ENSG00000109320.7	POU2F2	Homeodomain,POU	ENSG00000028277.16	0.00756873	protein_coding	15.7518	74.8209	53.1713	protein_coding	29.1567	506.789	296.345
NFKB1	ENSG00000109320.7	TFAP4	bHLH	ENSG00000090447.7	0.00817875	protein_coding	6.44111	12.8682	14.9109	protein_coding	29.1567	506.789	296.345
NFKB1	ENSG00000109320.7	FOXK2	Forkhead	ENSG00000141568.15	0.00748662	protein_coding	14.4827	45.2678	41.1481	protein_coding	29.1567	506.789	296.345
NFKB1	ENSG00000109320.7	ESRRA	Nuclear receptor	ENSG00000173153.9	0.00706142	protein_coding	8.26157	35.9147	35.2063	protein_coding	29.1567	506.789	296.345
NFKB1	ENSG00000109320.7	ELF2	Ets	ENSG00000109381.15	0.00706714	protein_coding	15.8982	8.39304	7.75401	protein_coding	29.1567	506.789	296.345
NFKB1	ENSG00000109320.7	PLAG1	C2H2 ZF	ENSG00000181690.3	0.0107176	protein_coding	8.37695	2.21704	1.83645	protein_coding	29.1567	506.789	296.345
NFKB1	ENSG00000109320.7	PRDM15	NA	ENSG00000141956.9	0.00737872	protein_coding	4.15744	9.23077	6.49964	protein_coding	29.1567	506.789	296.345
NFKB1	ENSG00000109320.7	AHR	bHLH	ENSG00000106546.8	0.00838479	protein_coding	9.41274	93.4629	53.6691	protein_coding	29.1567	506.789	296.345
NFKB1	ENSG00000109320.7	REL	Rel	ENSG00000162924.9	0.00926085	protein_coding	8.38764	216.888	56.7033	protein_coding	29.1567	506.789	296.345
LEF1	ENSG00000138795.5	KLF13	C2H2 ZF	ENSG00000169926.5	0.0079781	protein_coding	74.148	22.3999	42.3073	protein_coding	364.591	202.089	280.925
LEF1	ENSG00000138795.5	RELB	Rel	ENSG00000104856.9	0.00995915	protein_coding	8.90223	122.195	61.4806	protein_coding	364.591	202.089	280.925
LEF1	ENSG00000138795.5	EGR3	C2H2 ZF	ENSG00000179388.8	0.0124712	protein_coding	1.35095	132.127	45.4685	protein_coding	364.591	202.089	280.925
LEF1	ENSG00000138795.5	KLF10	C2H2 ZF	ENSG00000155090.10	0.00968551	protein_coding	2.98347	101.32	25.2161	protein_coding	364.591	202.089	280.925
LEF1	ENSG00000138795.5	FOSL1	bZIP	ENSG00000175592.4	0.00996646	protein_coding	1.60479	151.689	60.6658	protein_coding	364.591	202.089	280.925
LEF1	ENSG00000138795.5	FOSL2	bZIP	ENSG00000075426.7	0.00724086	protein_coding	2.97949	68.8857	12.7455	protein_coding	364.591	202.089	280.925
LEF1	ENSG00000138795.5	JUNB	bZIP	ENSG00000171223.4	0.0106831	protein_coding	58.3256	189.229	176.615	protein_coding	364.591	202.089	280.925
LEF1	ENSG00000138795.5	FOS	bZIP	ENSG00000170345.5	0.00991725	protein_coding	2.22869	22.6799	3.04045	protein_coding	364.591	202.089	280.925
LEF1	ENSG00000138795.5	SMAD2	NA	ENSG00000175387.11	0.00870785	protein_coding	21.3528	16.7268	18.7465	protein_coding	364.591	202.089	280.925
LEF1	ENSG00000138795.5	NR2C2	Nuclear receptor	ENSG00000177463.11	0.0118341	protein_coding	25.6732	14.2385	18.4864	protein_coding	364.591	202.089	280.925
LEF1	ENSG00000138795.5	PPARD	Nuclear receptor	ENSG00000112033.9	0.0137377	protein_coding	32.9083	14.8801	18.8092	protein_coding	364.591	202.089	280.925
LEF1	ENSG00000138795.5	ATF3	bZIP	ENSG00000162772.12	0.0183794	protein_coding	1.83901	12.5986	5.37156	protein_coding	364.591	202.089	280.925
LEF1	ENSG00000138795.5	EGR1	C2H2 ZF	ENSG00000120738.7	0.0135686	protein_coding	2.10936	136.228	76.4968	protein_coding	364.591	202.089	280.925
LEF1	ENSG00000138795.5	AHR	bHLH	ENSG00000106546.8	0.00952576	protein_coding	9.41274	93.4629	53.6691	protein_coding	364.591	202.089	280.925
LEF1	ENSG00000138795.5	IRF1	IRF	ENSG00000125347.9	0.00775744	protein_coding	20.5275	150.134	102.101	protein_coding	364.591	202.089	280.925
LEF1	ENSG00000138795.5	NFAT5	Rel	ENSG00000102908.16	0.00939585	protein_coding	13.1549	54.2287	31.9488	protein_coding	364.591	202.089	280.925
LEF1	ENSG00000138795.5	IRF3	IRF	ENSG00000126456.11	0.00767592	protein_coding	26.1248	12.3178	23.4694	protein_coding	364.591	202.089	280.925
LEF1	ENSG00000138795.5	FLI1	Ets	ENSG00000151702.12	0.00775276	protein_coding	25.0796	8.22835	13.354	protein_coding	364.591	202.089	280.925
LEF1	ENSG00000138795.5	ZNF460	C2H2 ZF	ENSG00000197714.4	0.00781107	protein_coding	31.8465	67.1283	30.8887	protein_coding	364.591	202.089	280.925
LEF1	ENSG00000138795.5	FOXJ2	Forkhead	ENSG00000065970.4	0.00709239	protein_coding	22.3937	14.2572	23.246	protein_coding	364.591	202.089	280.925
LEF1	ENSG00000138795.5	USF2	bHLH	ENSG00000105698.11	0.0139921	protein_coding	40.5727	17.8351	31.9485	protein_coding	364.591	202.089	280.925
LEF1	ENSG00000138795.5	PBX2	Homeodomain	ENSG00000204304.7	0.0116798	protein_coding	31.7444	13.5005	19.866	protein_coding	364.591	202.089	280.925
LEF1	ENSG00000138795.5	NFIL3	bZIP	ENSG00000165030.3	0.00943193	protein_coding	2.9022	11.3432	3.81128	protein_coding	364.591	202.089	280.925
LEF1	ENSG00000138795.5	RFX1	RFX	ENSG00000132005.4	0.0114688	protein_coding	12.2825	7.71665	10.0227	protein_coding	364.591	202.089	280.925
LEF1	ENSG00000138795.5	PKNOX1	Homeodomain	ENSG00000160199.10	0.00859097	protein_coding	6.08803	12.0409	6.80785	protein_coding	364.591	202.089	280.925
LEF1	ENSG00000138795.5	MAFG	bZIP	ENSG00000197063.6	0.00838581	protein_coding	5.59852	24.4516	19.1702	protein_coding	364.591	202.089	280.925
LEF1	ENSG00000138795.5	FOXK1	Forkhead	ENSG00000164916.9	0.00768592	protein_coding	29.2615	39.2605	34.7856	protein_coding	364.591	202.089	280.925
LEF1	ENSG00000138795.5	FOXP1	Forkhead	ENSG00000114861.14	0.00877913	protein_coding	81.9274	148.688	90.0929	protein_coding	364.591	202.089	280.925
LEF1	ENSG00000138795.5	NFYA	CBF/NF-Y	ENSG00000001167.10	0.0118971	protein_coding	22.9157	43.4457	28.5316	protein_coding	364.591	202.089	280.925
LEF1	ENSG00000138795.5	REL	Rel	ENSG00000162924.9	0.0116933	protein_coding	8.38764	216.888	56.7033	protein_coding	364.591	202.089	280.925
LEF1	ENSG00000138795.5	BCL6	C2H2 ZF	ENSG00000113916.13	0.013146	protein_coding	4.17339	18.1066	5.56979	protein_coding	364.591	202.089	280.925
LEF1	ENSG00000138795.5	MYB	Myb/SANT	ENSG00000118513.14	0.0119305	protein_coding	8.9003	38.6206	20.9037	protein_coding	364.591	202.089	280.925
LEF1	ENSG00000138795.5	ZBTB14	C2H2 ZF	ENSG00000198081.6	0.00903584	protein_coding	22.0902	8.83913	14.8651	protein_coding	364.591	202.089	280.925
LEF1	ENSG00000138795.5	GFI1	C2H2 ZF	ENSG00000162676.7	0.0118893	protein_coding	10.0452	202.356	83.9047	protein_coding	364.591	202.089	280.925
LEF1	ENSG00000138795.5	DDIT3	bZIP	ENSG00000175197.6	0.0132517	protein_coding	12.2974	35.3201	14.9946	protein_coding	364.591	202.089	280.925
LEF1	ENSG00000138795.5	NR4A1	Nuclear receptor	ENSG00000123358.15	0.0139347	protein_coding	1.8162	137.343	53.2826	protein_coding	364.591	202.089	280.925
E2F2	ENSG00000007968.6	RUNX1	Runt	ENSG00000159216.14	0.00836596	protein_coding	21.5738	25.8568	16.771	protein_coding	1.28522	1.38068	13.9787
ELF2	ENSG00000109381.15	KLF12	C2H2 ZF	ENSG00000118922.12	0.0070516	protein_coding	53.6377	14.6764	9.57696	protein_coding	15.8982	8.39304	7.75401
ELF2	ENSG00000109381.15	ESRRA	Nuclear receptor	ENSG00000173153.9	0.00773323	protein_coding	8.26157	35.9147	35.2063	protein_coding	15.8982	8.39304	7.75401
ELF2	ENSG00000109381.15	PBX3	Homeodomain	ENSG00000167081.12	0.00970874	protein_coding	9.21206	5.42354	5.54844	protein_coding	15.8982	8.39304	7.75401
ELF2	ENSG00000109381.15	HIC1	C2H2 ZF	ENSG00000177374.8	0.00727654	protein_coding	1.90744	22.6054	41.0085	protein_coding	15.8982	8.39304	7.75401
ELF2	ENSG00000109381.15	NR2C1	Nuclear receptor	ENSG00000120798.12	0.0082737	protein_coding	11.3642	5.96711	5.43842	protein_coding	15.8982	8.39304	7.75401
ELF2	ENSG00000109381.15	BATF3	bZIP	ENSG00000123685.4	0.00879769	protein_coding	1.65811	41.5687	22.1585	protein_coding	15.8982	8.39304	7.75401
ELF2	ENSG00000109381.15	HSF2	HSF	ENSG00000025156.8	0.00796469	protein_coding	20.2022	22.7886	23.1956	protein_coding	15.8982	8.39304	7.75401
ELF2	ENSG00000109381.15	ATF4	bZIP	ENSG00000128272.10	0.00730706	protein_coding	83.1187	333.068	339.627	protein_coding	15.8982	8.39304	7.75401
NR3C2	ENSG00000151623.10	MZF1	C2H2 ZF	ENSG00000099326.4	0.00852208	protein_coding	11.9589	11.2526	7.29446	protein_coding	20.4478	5.80412	3.02898
NR3C2	ENSG00000151623.10	IRF8	IRF	ENSG00000140968.6	0.0070449	protein_coding	2.7126	143.835	108.547	protein_coding	20.4478	5.80412	3.02898
E2F2	ENSG00000007968.6	BACH1	bZIP	ENSG00000156273.11	0.00782002	protein_coding	15.2362	29.6887	9.70708	protein_coding	1.28522	1.38068	13.9787
E2F2	ENSG00000007968.6	NR2F6	Nuclear receptor	ENSG00000160113.5	0.00793683	protein_coding	2.22949	6.45054	10.1467	protein_coding	1.28522	1.38068	13.9787
IRF2	ENSG00000168310.6	KLF13	C2H2 ZF	ENSG00000169926.5	0.00729959	protein_coding	74.148	22.3999	42.3073	protein_coding	38.8138	22.4929	43.0542
IRF2	ENSG00000168310.6	MTF1	C2H2 ZF	ENSG00000188786.9	0.0125328	protein_coding	10.1249	31.2324	26.6528	protein_coding	38.8138	22.4929	43.0542
IRF2	ENSG00000168310.6	PRDM1	C2H2 ZF	ENSG00000057657.10	0.00851575	protein_coding	1.80343	5.61797	1.2626	protein_coding	38.8138	22.4929	43.0542
IRF2	ENSG00000168310.6	NFIL3	bZIP	ENSG00000165030.3	0.00751104	protein_coding	2.9022	11.3432	3.81128	protein_coding	38.8138	22.4929	43.0542
IRF2	ENSG00000168310.6	GFI1	C2H2 ZF	ENSG00000162676.7	0.00734964	protein_coding	10.0452	202.356	83.9047	protein_coding	38.8138	22.4929	43.0542
IRF2	ENSG00000168310.6	NFYA	CBF/NF-Y	ENSG00000001167.10	0.00760317	protein_coding	22.9157	43.4457	28.5316	protein_coding	38.8138	22.4929	43.0542
IRF2	ENSG00000168310.6	STAT5B	STAT	ENSG00000173757.5	0.00716779	protein_coding	79.7973	88.8999	50.9057	protein_coding	38.8138	22.4929	43.0542
IRF2	ENSG00000168310.6	FOSL1	bZIP	ENSG00000175592.4	0.00745545	protein_coding	1.60479	151.689	60.6658	protein_coding	38.8138	22.4929	43.0542
IRF2	ENSG00000168310.6	BATF3	bZIP	ENSG00000123685.4	0.00877941	protein_coding	1.65811	41.5687	22.1585	protein_coding	38.8138	22.4929	43.0542
IRF2	ENSG00000168310.6	ZNF24	C2H2 ZF	ENSG00000172466.11	0.00954561	protein_coding	24.04	36.803	22.5491	protein_coding	38.8138	22.4929	43.0542
IRF2	ENSG00000168310.6	TCF12	bHLH	ENSG00000140262.13	0.00704634	protein_coding	17.2377	15.075	18.308	protein_coding	38.8138	22.4929	43.0542
IRF2	ENSG00000168310.6	CEBPG	bZIP	ENSG00000153879.4	0.00736551	protein_coding	9.95546	26.2151	15.8662	protein_coding	38.8138	22.4929	43.0542
IRF2	ENSG00000168310.6	FLI1	Ets	ENSG00000151702.12	0.00923938	protein_coding	25.0796	8.22835	13.354	protein_coding	38.8138	22.4929	43.0542
IRF2	ENSG00000168310.6	MAFK	bZIP	ENSG00000198517.5	0.00878606	protein_coding	7.86877	20.1437	11.0981	protein_coding	38.8138	22.4929	43.0542
IRF2	ENSG00000168310.6	TCF7	Sox	ENSG00000081059.15	0.00838488	protein_coding	224.006	63.0622	58.9134	protein_coding	38.8138	22.4929	43.0542
IRF2	ENSG00000168310.6	LEF1	Sox	ENSG00000138795.5	0.010235	protein_coding	364.591	202.089	280.925	protein_coding	38.8138	22.4929	43.0542
IRF2	ENSG00000168310.6	ELF4	Ets	ENSG00000102034.12	0.00894113	protein_coding	26.4618	20.1657	33.0515	protein_coding	38.8138	22.4929	43.0542
IRF2	ENSG00000168310.6	NR2C1	Nuclear receptor	ENSG00000120798.12	0.00800757	protein_coding	11.3642	5.96711	5.43842	protein_coding	38.8138	22.4929	43.0542
IRF2	ENSG00000168310.6	PBX2	Homeodomain	ENSG00000204304.7	0.0146063	protein_coding	31.7444	13.5005	19.866	protein_coding	38.8138	22.4929	43.0542
IRF2	ENSG00000168310.6	XBP1	bZIP	ENSG00000100219.12	0.0114279	protein_coding	53.3347	169.494	64.6697	protein_coding	38.8138	22.4929	43.0542
IRF2	ENSG00000168310.6	ARID3B	ARID/BRIGHT	ENSG00000179361.13	0.0112421	protein_coding	10.7108	6.6985	7.73282	protein_coding	38.8138	22.4929	43.0542
IRF2	ENSG00000168310.6	SP3	C2H2 ZF	ENSG00000172845.9	0.00713241	protein_coding	25.2192	19.597	24.3094	protein_coding	38.8138	22.4929	43.0542
IRF2	ENSG00000168310.6	LIN54	TCR/CxC	ENSG00000189308.6	0.00906485	protein_coding	8.21127	3.97463	10.4772	protein_coding	38.8138	22.4929	43.0542
IRF2	ENSG00000168310.6	ARNT	bHLH	ENSG00000143437.16	0.00874569	protein_coding	23.8486	13.5725	25.4699	protein_coding	38.8138	22.4929	43.0542
IRF2	ENSG00000168310.6	ARNTL	bHLH	ENSG00000133794.13	0.00710989	protein_coding	14.2686	5.78231	4.69964	protein_coding	38.8138	22.4929	43.0542
IRF2	ENSG00000168310.6	IRF8	IRF	ENSG00000140968.6	0.00892715	protein_coding	2.7126	143.835	108.547	protein_coding	38.8138	22.4929	43.0542
IRF2	ENSG00000168310.6	IRF4	IRF	ENSG00000137265.10	0.00798256	protein_coding	5.6988	783.89	464.786	protein_coding	38.8138	22.4929	43.0542
IRF2	ENSG00000168310.6	IRF3	IRF	ENSG00000126456.11	0.012211	protein_coding	26.1248	12.3178	23.4694	protein_coding	38.8138	22.4929	43.0542
IRF2	ENSG00000168310.6	PKNOX1	Homeodomain	ENSG00000160199.10	0.00744963	protein_coding	6.08803	12.0409	6.80785	protein_coding	38.8138	22.4929	43.0542
IRF2	ENSG00000168310.6	PPARD	Nuclear receptor	ENSG00000112033.9	0.0146354	protein_coding	32.9083	14.8801	18.8092	protein_coding	38.8138	22.4929	43.0542
IRF2	ENSG00000168310.6	SP4	C2H2 ZF	ENSG00000105866.9	0.0122677	protein_coding	25.1884	15.9254	18.3065	protein_coding	38.8138	22.4929	43.0542
IRF2	ENSG00000168310.6	FOXJ2	Forkhead	ENSG00000065970.4	0.0103857	protein_coding	22.3937	14.2572	23.246	protein_coding	38.8138	22.4929	43.0542
IRF2	ENSG00000168310.6	TCFL5	bHLH	ENSG00000101190.8	0.00902307	protein_coding	7.68045	6.17238	7.05429	protein_coding	38.8138	22.4929	43.0542
IRF1	ENSG00000125347.9	SNAI1	C2H2 ZF	ENSG00000124216.3	0.00745944	protein_coding	1.30754	8.60721	3.42322	protein_coding	20.5275	150.134	102.101
IRF1	ENSG00000125347.9	SREBF2	bHLH	ENSG00000198911.7	0.00978289	protein_coding	19.003	55.9017	56.7619	protein_coding	20.5275	150.134	102.101
IRF1	ENSG00000125347.9	RFX3	RFX	ENSG00000080298.11	0.0107308	protein_coding	8.42273	4.67247	4.49608	protein_coding	20.5275	150.134	102.101
IRF1	ENSG00000125347.9	PPARA	Nuclear receptor	ENSG00000186951.12	0.00834054	protein_coding	5.8692	2.70244	4.58454	protein_coding	20.5275	150.134	102.101
IRF1	ENSG00000125347.9	STAT1	STAT	ENSG00000115415.14	0.00841987	protein_coding	35.0834	445.774	430.889	protein_coding	20.5275	150.134	102.101
IRF1	ENSG00000125347.9	EGR3	C2H2 ZF	ENSG00000179388.8	0.00839175	protein_coding	1.35095	132.127	45.4685	protein_coding	20.5275	150.134	102.101
IRF1	ENSG00000125347.9	ZNF652	C2H2 ZF	ENSG00000198740.4	0.00853602	protein_coding	24.2045	7.59965	3.95535	protein_coding	20.5275	150.134	102.101
IRF1	ENSG00000125347.9	FOSL1	bZIP	ENSG00000175592.4	0.0094262	protein_coding	1.60479	151.689	60.6658	protein_coding	20.5275	150.134	102.101
IRF1	ENSG00000125347.9	NFE2L1	bZIP	ENSG00000082641.11	0.00900347	protein_coding	20.3803	36.5648	41.2383	protein_coding	20.5275	150.134	102.101
IRF1	ENSG00000125347.9	PRDM15	NA	ENSG00000141956.9	0.0104755	protein_coding	4.15744	9.23077	6.49964	protein_coding	20.5275	150.134	102.101
IRF1	ENSG00000125347.9	ETS1	Ets	ENSG00000134954.10	0.0077067	protein_coding	452.612	162.87	218.837	protein_coding	20.5275	150.134	102.101
IRF1	ENSG00000125347.9	USF2	bHLH	ENSG00000105698.11	0.00812507	protein_coding	40.5727	17.8351	31.9485	protein_coding	20.5275	150.134	102.101
IRF1	ENSG00000125347.9	MYB	Myb/SANT	ENSG00000118513.14	0.00746224	protein_coding	8.9003	38.6206	20.9037	protein_coding	20.5275	150.134	102.101
TCF7	ENSG00000081059.15	RELA	Rel	ENSG00000173039.14	0.00872432	protein_coding	47.6368	71.7005	69.9761	protein_coding	224.006	63.0622	58.9134
TCF7	ENSG00000081059.15	RORA	Nuclear receptor	ENSG00000069667.11	0.00939643	protein_coding	23.2819	9.22455	1.52915	protein_coding	224.006	63.0622	58.9134
TCF7	ENSG00000081059.15	AHR	bHLH	ENSG00000106546.8	0.00753274	protein_coding	9.41274	93.4629	53.6691	protein_coding	224.006	63.0622	58.9134
TCF7	ENSG00000081059.15	ARNTL	bHLH	ENSG00000133794.13	0.00912173	protein_coding	14.2686	5.78231	4.69964	protein_coding	224.006	63.0622	58.9134
TCF7	ENSG00000081059.15	ATF1	bZIP	ENSG00000123268.4	0.00766225	protein_coding	14.2756	30.5257	29.5574	protein_coding	224.006	63.0622	58.9134
TCF7	ENSG00000081059.15	NFE2L1	bZIP	ENSG00000082641.11	0.00785875	protein_coding	20.3803	36.5648	41.2383	protein_coding	224.006	63.0622	58.9134
TCF7	ENSG00000081059.15	NFATC1	Rel	ENSG00000131196.13	0.00733516	protein_coding	26.5075	58.5079	62.1764	protein_coding	224.006	63.0622	58.9134
TCF7	ENSG00000081059.15	FLI1	Ets	ENSG00000151702.12	0.00882668	protein_coding	25.0796	8.22835	13.354	protein_coding	224.006	63.0622	58.9134
TCF7	ENSG00000081059.15	KLF16	C2H2 ZF	ENSG00000129911.4	0.00879922	protein_coding	11.7561	43.2471	45.3241	protein_coding	224.006	63.0622	58.9134
TCF7	ENSG00000081059.15	ZNF652	C2H2 ZF	ENSG00000198740.4	0.00771158	protein_coding	24.2045	7.59965	3.95535	protein_coding	224.006	63.0622	58.9134
TCF7	ENSG00000081059.15	SMAD4	SMAD	ENSG00000141646.9	0.00706461	protein_coding	13.9346	9.28591	7.65724	protein_coding	224.006	63.0622	58.9134
TCF7	ENSG00000081059.15	RFX3	RFX	ENSG00000080298.11	0.00815753	protein_coding	8.42273	4.67247	4.49608	protein_coding	224.006	63.0622	58.9134
TCF7	ENSG00000081059.15	USF2	bHLH	ENSG00000105698.11	0.00815438	protein_coding	40.5727	17.8351	31.9485	protein_coding	224.006	63.0622	58.9134
TCF7	ENSG00000081059.15	ZNF449	C2H2 ZF	ENSG00000173275.8	0.00849145	protein_coding	5.83095	1.93546	1.12909	protein_coding	224.006	63.0622	58.9134
TCF7	ENSG00000081059.15	KLF3	C2H2 ZF	ENSG00000109787.8	0.00797088	protein_coding	125.276	30.3117	18.848	protein_coding	224.006	63.0622	58.9134
TCF7	ENSG00000081059.15	TFDP1	E2F	ENSG00000198176.8	0.00765154	protein_coding	10.5546	23.5774	99.2647	protein_coding	224.006	63.0622	58.9134
TCF7	ENSG00000081059.15	FOXO4	Forkhead	ENSG00000184481.12	0.00856348	protein_coding	16.4678	5.06429	4.3744	protein_coding	224.006	63.0622	58.9134
TCF7	ENSG00000081059.15	MEF2D	MADS box	ENSG00000116604.13	0.0070538	protein_coding	36.798	25.1847	25.5343	protein_coding	224.006	63.0622	58.9134
TCF7	ENSG00000081059.15	SREBF2	bHLH	ENSG00000198911.7	0.00909966	protein_coding	19.003	55.9017	56.7619	protein_coding	224.006	63.0622	58.9134
EGR1	ENSG00000120738.7	HIC2	C2H2 ZF	ENSG00000169635.5	0.00826336	protein_coding	6.41821	10.2589	5.99889	protein_coding	2.10936	136.228	76.4968
EGR1	ENSG00000120738.7	NFAT5	Rel	ENSG00000102908.16	0.0103529	protein_coding	13.1549	54.2287	31.9488	protein_coding	2.10936	136.228	76.4968
EGR1	ENSG00000120738.7	PPARD	Nuclear receptor	ENSG00000112033.9	0.00941186	protein_coding	32.9083	14.8801	18.8092	protein_coding	2.10936	136.228	76.4968
EGR1	ENSG00000120738.7	EGR3	C2H2 ZF	ENSG00000179388.8	0.0127955	protein_coding	1.35095	132.127	45.4685	protein_coding	2.10936	136.228	76.4968
EGR1	ENSG00000120738.7	MAFG	bZIP	ENSG00000197063.6	0.0115907	protein_coding	5.59852	24.4516	19.1702	protein_coding	2.10936	136.228	76.4968
EGR1	ENSG00000120738.7	SNAI1	C2H2 ZF	ENSG00000124216.3	0.0108932	protein_coding	1.30754	8.60721	3.42322	protein_coding	2.10936	136.228	76.4968
EGR1	ENSG00000120738.7	RFX1	RFX	ENSG00000132005.4	0.0151805	protein_coding	12.2825	7.71665	10.0227	protein_coding	2.10936	136.228	76.4968
EGR1	ENSG00000120738.7	NR4A1	Nuclear receptor	ENSG00000123358.15	0.00857383	protein_coding	1.8162	137.343	53.2826	protein_coding	2.10936	136.228	76.4968
EGR1	ENSG00000120738.7	LEF1	Sox	ENSG00000138795.5	0.0130941	protein_coding	364.591	202.089	280.925	protein_coding	2.10936	136.228	76.4968
EGR1	ENSG00000120738.7	FOSB	bZIP	ENSG00000125740.9	0.00703913	protein_coding	1.38153	14.6115	1.57442	protein_coding	2.10936	136.228	76.4968
EGR1	ENSG00000120738.7	FOSL1	bZIP	ENSG00000175592.4	0.0100468	protein_coding	1.60479	151.689	60.6658	protein_coding	2.10936	136.228	76.4968
EGR1	ENSG00000120738.7	ATF3	bZIP	ENSG00000162772.12	0.00796933	protein_coding	1.83901	12.5986	5.37156	protein_coding	2.10936	136.228	76.4968
EGR1	ENSG00000120738.7	IRF1	IRF	ENSG00000125347.9	0.00822211	protein_coding	20.5275	150.134	102.101	protein_coding	2.10936	136.228	76.4968
EGR1	ENSG00000120738.7	KLF10	C2H2 ZF	ENSG00000155090.10	0.0124072	protein_coding	2.98347	101.32	25.2161	protein_coding	2.10936	136.228	76.4968
EGR1	ENSG00000120738.7	FOS	bZIP	ENSG00000170345.5	0.00925506	protein_coding	2.22869	22.6799	3.04045	protein_coding	2.10936	136.228	76.4968
EGR1	ENSG00000120738.7	NFE2L2	bZIP	ENSG00000116044.11	0.00763269	protein_coding	43.1876	100.955	67.5731	protein_coding	2.10936	136.228	76.4968
EGR1	ENSG00000120738.7	FOXJ2	Forkhead	ENSG00000065970.4	0.0093498	protein_coding	22.3937	14.2572	23.246	protein_coding	2.10936	136.228	76.4968
EGR1	ENSG00000120738.7	USF2	bHLH	ENSG00000105698.11	0.0092389	protein_coding	40.5727	17.8351	31.9485	protein_coding	2.10936	136.228	76.4968
NR3C1	ENSG00000113580.10	ZEB1	C2H2 ZF,Homeodomain	ENSG00000148516.17	0.012218	protein_coding	30.5601	27.0703	15.1315	protein_coding	34.8792	35.9849	17.06
NR3C1	ENSG00000113580.10	RREB1	C2H2 ZF	ENSG00000124782.15	0.00975059	protein_coding	16.4582	21.8455	9.185	protein_coding	34.8792	35.9849	17.06
NR3C1	ENSG00000113580.10	ZNF354C	C2H2 ZF	ENSG00000177932.6	0.0103228	protein_coding	8.44028	6.87653	5.68326	protein_coding	34.8792	35.9849	17.06
NR3C1	ENSG00000113580.10	ZNF341	C2H2 ZF	ENSG00000131061.9	0.00813233	protein_coding	4.7502	6.20738	8.51451	protein_coding	34.8792	35.9849	17.06
NR3C1	ENSG00000113580.10	CUX1	CUT,Homeodomain	ENSG00000257923.5	0.00745095	protein_coding	11.876	9.90491	6.20826	protein_coding	34.8792	35.9849	17.06
NR3C1	ENSG00000113580.10	THAP11	THAP finger	ENSG00000168286.1	0.00810461	protein_coding	44.1418	46.0762	84.2597	protein_coding	34.8792	35.9849	17.06
NR3C1	ENSG00000113580.10	KLF2	C2H2 ZF	ENSG00000127528.5	0.0075907	protein_coding	643.228	77.5309	3.57086	protein_coding	34.8792	35.9849	17.06
NR3C1	ENSG00000113580.10	ZNF274	C2H2 ZF	ENSG00000171606.13	0.00703077	protein_coding	11.254	11.7971	7.18352	protein_coding	34.8792	35.9849	17.06
NR3C1	ENSG00000113580.10	NR1D2	Nuclear receptor	ENSG00000174738.8	0.00938141	protein_coding	19.0213	11.2444	3.15062	protein_coding	34.8792	35.9849	17.06
NR3C1	ENSG00000113580.10	MZF1	C2H2 ZF	ENSG00000099326.4	0.0075258	protein_coding	11.9589	11.2526	7.29446	protein_coding	34.8792	35.9849	17.06
NR3C1	ENSG00000113580.10	MEF2A	MADS box	ENSG00000068305.13	0.0125313	protein_coding	17.5747	16.3968	11.6467	protein_coding	34.8792	35.9849	17.06
NR3C1	ENSG00000113580.10	NFIC	SMAD	ENSG00000141905.13	0.0188599	protein_coding	14.4289	14.8113	25.0569	protein_coding	34.8792	35.9849	17.06
NR3C1	ENSG00000113580.10	ZNF528	C2H2 ZF	ENSG00000167555.9	0.00924971	protein_coding	6.29283	4.82699	1.29655	protein_coding	34.8792	35.9849	17.06
NR3C1	ENSG00000113580.10	RUNX1	Runt	ENSG00000159216.14	0.00816211	protein_coding	21.5738	25.8568	16.771	protein_coding	34.8792	35.9849	17.06
NR3C1	ENSG00000113580.10	VEZF1	C2H2 ZF	ENSG00000136451.4	0.0097579	protein_coding	35.7029	28.3574	20.778	protein_coding	34.8792	35.9849	17.06
RUNX3	ENSG00000020633.14	MAZ	C2H2 ZF	ENSG00000103495.9	0.00707274	protein_coding	71.6034	91.0371	189.127	protein_coding	47.4684	73.1236	109.548
RUNX3	ENSG00000020633.14	E2F2	E2F	ENSG00000007968.6	0.0104455	protein_coding	1.28522	1.38068	13.9787	protein_coding	47.4684	73.1236	109.548
RUNX3	ENSG00000020633.14	E2F1	E2F	ENSG00000101412.9	0.0104734	protein_coding	3.27673	2.94519	105.532	protein_coding	47.4684	73.1236	109.548
RUNX3	ENSG00000020633.14	SMAD4	SMAD	ENSG00000141646.9	0.0121365	protein_coding	13.9346	9.28591	7.65724	protein_coding	47.4684	73.1236	109.548
RUNX3	ENSG00000020633.14	ELF1	Ets	ENSG00000120690.9	0.00733588	protein_coding	72.2458	77.2599	48.5997	protein_coding	47.4684	73.1236	109.548
RUNX3	ENSG00000020633.14	VEZF1	C2H2 ZF	ENSG00000136451.4	0.0077399	protein_coding	35.7029	28.3574	20.778	protein_coding	47.4684	73.1236	109.548
RUNX3	ENSG00000020633.14	MEF2A	MADS box	ENSG00000068305.13	0.00702801	protein_coding	17.5747	16.3968	11.6467	protein_coding	47.4684	73.1236	109.548
ZNF354C	ENSG00000177932.6	ARNTL	bHLH	ENSG00000133794.13	0.00800805	protein_coding	14.2686	5.78231	4.69964	protein_coding	8.44028	6.87653	5.68326
ZNF354C	ENSG00000177932.6	KLF2	C2H2 ZF	ENSG00000127528.5	0.00893292	protein_coding	643.228	77.5309	3.57086	protein_coding	8.44028	6.87653	5.68326
ZNF354C	ENSG00000177932.6	MLXIP	bHLH	ENSG00000175727.9	0.0108746	protein_coding	38.3803	32.1952	21.9588	protein_coding	8.44028	6.87653	5.68326
ZNF354C	ENSG00000177932.6	FOXP3	Forkhead	ENSG00000049768.10	0.00809854	protein_coding	2.19489	3.42871	6.75386	protein_coding	8.44028	6.87653	5.68326
ZNF354C	ENSG00000177932.6	FOXO3	Forkhead	ENSG00000118689.10	0.00815446	protein_coding	9.87318	6.89084	3.15724	protein_coding	8.44028	6.87653	5.68326
ZNF354C	ENSG00000177932.6	PBX3	Homeodomain	ENSG00000167081.12	0.00738406	protein_coding	9.21206	5.42354	5.54844	protein_coding	8.44028	6.87653	5.68326
ZNF354C	ENSG00000177932.6	ELK1	Ets	ENSG00000126767.13	0.00748384	protein_coding	18.6585	40.6808	59.8587	protein_coding	8.44028	6.87653	5.68326
IRF4	ENSG00000137265.10	FOXN3	Forkhead	ENSG00000053254.11	0.00838308	protein_coding	27.663	22.1201	34.2645	protein_coding	5.6988	783.89	464.786
IRF4	ENSG00000137265.10	NR2C2	Nuclear receptor	ENSG00000177463.11	0.00847288	protein_coding	25.6732	14.2385	18.4864	protein_coding	5.6988	783.89	464.786
IRF4	ENSG00000137265.10	NFKB1	Rel	ENSG00000109320.7	0.00879136	protein_coding	29.1567	506.789	296.345	protein_coding	5.6988	783.89	464.786
IRF4	ENSG00000137265.10	REL	Rel	ENSG00000162924.9	0.00848923	protein_coding	8.38764	216.888	56.7033	protein_coding	5.6988	783.89	464.786
IRF4	ENSG00000137265.10	ETS1	Ets	ENSG00000134954.10	0.00899372	protein_coding	452.612	162.87	218.837	protein_coding	5.6988	783.89	464.786
IRF4	ENSG00000137265.10	FLI1	Ets	ENSG00000151702.12	0.00885821	protein_coding	25.0796	8.22835	13.354	protein_coding	5.6988	783.89	464.786
IRF4	ENSG00000137265.10	CLOCK	bHLH	ENSG00000134852.10	0.00705665	protein_coding	6.07677	11.1627	10.8958	protein_coding	5.6988	783.89	464.786
IRF4	ENSG00000137265.10	SP4	C2H2 ZF	ENSG00000105866.9	0.0087054	protein_coding	25.1884	15.9254	18.3065	protein_coding	5.6988	783.89	464.786
IRF4	ENSG00000137265.10	SP2	C2H2 ZF	ENSG00000167182.11	0.00719412	protein_coding	34.5701	58.9216	43.343	protein_coding	5.6988	783.89	464.786
IRF4	ENSG00000137265.10	SMAD2	NA	ENSG00000175387.11	0.0114181	protein_coding	21.3528	16.7268	18.7465	protein_coding	5.6988	783.89	464.786
IRF4	ENSG00000137265.10	FOSL2	bZIP	ENSG00000075426.7	0.00826943	protein_coding	2.97949	68.8857	12.7455	protein_coding	5.6988	783.89	464.786
IRF4	ENSG00000137265.10	NFIX	SMAD	ENSG00000008441.12	0.00778733	protein_coding	4.02934	24.3211	14.9281	protein_coding	5.6988	783.89	464.786
IRF4	ENSG00000137265.10	TBX21	T-box	ENSG00000073861.2	0.00802565	protein_coding	2.92139	115.541	116.88	protein_coding	5.6988	783.89	464.786
IRF4	ENSG00000137265.10	JUNB	bZIP	ENSG00000171223.4	0.00920797	protein_coding	58.3256	189.229	176.615	protein_coding	5.6988	783.89	464.786
IRF4	ENSG00000137265.10	PLAG1	C2H2 ZF	ENSG00000181690.3	0.00940567	protein_coding	8.37695	2.21704	1.83645	protein_coding	5.6988	783.89	464.786
IRF4	ENSG00000137265.10	RFX1	RFX	ENSG00000132005.4	0.00993357	protein_coding	12.2825	7.71665	10.0227	protein_coding	5.6988	783.89	464.786
IRF4	ENSG00000137265.10	USF2	bHLH	ENSG00000105698.11	0.00703021	protein_coding	40.5727	17.8351	31.9485	protein_coding	5.6988	783.89	464.786
IRF4	ENSG00000137265.10	FOXK2	Forkhead	ENSG00000141568.15	0.0071527	protein_coding	14.4827	45.2678	41.1481	protein_coding	5.6988	783.89	464.786
IRF4	ENSG00000137265.10	IRF3	IRF	ENSG00000126456.11	0.00850129	protein_coding	26.1248	12.3178	23.4694	protein_coding	5.6988	783.89	464.786
IRF4	ENSG00000137265.10	STAT4	STAT	ENSG00000138378.13	0.00896613	protein_coding	36.264	65.4242	65.4886	protein_coding	5.6988	783.89	464.786
IRF4	ENSG00000137265.10	PPARD	Nuclear receptor	ENSG00000112033.9	0.00784853	protein_coding	32.9083	14.8801	18.8092	protein_coding	5.6988	783.89	464.786
IRF4	ENSG00000137265.10	PBX2	Homeodomain	ENSG00000204304.7	0.00723367	protein_coding	31.7444	13.5005	19.866	protein_coding	5.6988	783.89	464.786
RREB1	ENSG00000124782.15	IRF1	IRF	ENSG00000125347.9	0.00732815	protein_coding	20.5275	150.134	102.101	protein_coding	16.4582	21.8455	9.185
RUNX3	ENSG00000020633.14	STAT5B	STAT	ENSG00000173757.5	0.00762903	protein_coding	79.7973	88.8999	50.9057	protein_coding	47.4684	73.1236	109.548
RREB1	ENSG00000124782.15	TGIF1	Homeodomain	ENSG00000177426.16	0.00942627	protein_coding	11.7375	22.7534	3.25931	protein_coding	16.4582	21.8455	9.185
RREB1	ENSG00000124782.15	ELF1	Ets	ENSG00000120690.9	0.00775947	protein_coding	72.2458	77.2599	48.5997	protein_coding	16.4582	21.8455	9.185
RREB1	ENSG00000124782.15	CTCF	C2H2 ZF	ENSG00000102974.10	0.0102481	protein_coding	50.6801	45.7903	69.2994	protein_coding	16.4582	21.8455	9.185
RREB1	ENSG00000124782.15	TCF3	bHLH	ENSG00000071564.10	0.00720151	protein_coding	18.7774	32.7741	47.0143	protein_coding	16.4582	21.8455	9.185
RREB1	ENSG00000124782.15	RUNX1	Runt	ENSG00000159216.14	0.0107132	protein_coding	21.5738	25.8568	16.771	protein_coding	16.4582	21.8455	9.185
RREB1	ENSG00000124782.15	RUNX3	Runt	ENSG00000020633.14	0.00759322	protein_coding	47.4684	73.1236	109.548	protein_coding	16.4582	21.8455	9.185
RREB1	ENSG00000124782.15	ZNF136	C2H2 ZF	ENSG00000196646.7	0.0122239	protein_coding	7.35826	8.26587	5.50982	protein_coding	16.4582	21.8455	9.185
RREB1	ENSG00000124782.15	CEBPB	bZIP	ENSG00000172216.4	0.00800417	protein_coding	13.8991	21.8187	11.2238	protein_coding	16.4582	21.8455	9.185
RREB1	ENSG00000124782.15	NR3C1	Nuclear receptor	ENSG00000113580.10	0.00802213	protein_coding	34.8792	35.9849	17.06	protein_coding	16.4582	21.8455	9.185
RREB1	ENSG00000124782.15	SOX12	Sox	ENSG00000177732.6	0.00863597	protein_coding	11.96	7.80491	17.9188	protein_coding	16.4582	21.8455	9.185
RREB1	ENSG00000124782.15	ZBTB32	C2H2 ZF	ENSG00000011590.9	0.00931811	protein_coding	1.62528	8.92416	31.9888	protein_coding	16.4582	21.8455	9.185
ELK4	ENSG00000158711.9	ZNF281	C2H2 ZF	ENSG00000162702.7	0.0121451	protein_coding	19.3751	26.911	17.9295	protein_coding	67.4856	107.039	70.1592
ELK4	ENSG00000158711.9	FOSL2	bZIP	ENSG00000075426.7	0.00780525	protein_coding	2.97949	68.8857	12.7455	protein_coding	67.4856	107.039	70.1592
RREB1	ENSG00000124782.15	ZBTB7B	C2H2 ZF	ENSG00000160685.9	0.00727563	protein_coding	24.438	20.102	65.1258	protein_coding	16.4582	21.8455	9.185
ELK4	ENSG00000158711.9	ZNF460	C2H2 ZF	ENSG00000197714.4	0.0106056	protein_coding	31.8465	67.1283	30.8887	protein_coding	67.4856	107.039	70.1592
ELK4	ENSG00000158711.9	STAT5A	STAT	ENSG00000126561.12	0.0121884	protein_coding	36.4983	316.372	118.146	protein_coding	67.4856	107.039	70.1592
ELK4	ENSG00000158711.9	STAT5B	STAT	ENSG00000173757.5	0.00702242	protein_coding	79.7973	88.8999	50.9057	protein_coding	67.4856	107.039	70.1592
RUNX3	ENSG00000020633.14	GATA3	GATA	ENSG00000107485.11	0.00909887	protein_coding	27.0461	22.0926	11.966	protein_coding	47.4684	73.1236	109.548
ELK4	ENSG00000158711.9	PRDM1	C2H2 ZF	ENSG00000057657.10	0.0108045	protein_coding	1.80343	5.61797	1.2626	protein_coding	67.4856	107.039	70.1592
ELK4	ENSG00000158711.9	FOSL1	bZIP	ENSG00000175592.4	0.00920227	protein_coding	1.60479	151.689	60.6658	protein_coding	67.4856	107.039	70.1592
E2F3	ENSG00000112242.10	CTCF	C2H2 ZF	ENSG00000102974.10	0.0114886	protein_coding	50.6801	45.7903	69.2994	protein_coding	26.8673	15.6333	26.0004
E2F3	ENSG00000112242.10	PPARA	Nuclear receptor	ENSG00000186951.12	0.00863764	protein_coding	5.8692	2.70244	4.58454	protein_coding	26.8673	15.6333	26.0004
SOX4	ENSG00000124766.4	NR2F6	Nuclear receptor	ENSG00000160113.5	0.00776636	protein_coding	2.22949	6.45054	10.1467	protein_coding	6.87304	3.60192	2.03513
E2F3	ENSG00000112242.10	NFIL3	bZIP	ENSG00000165030.3	0.00937266	protein_coding	2.9022	11.3432	3.81128	protein_coding	26.8673	15.6333	26.0004
E2F3	ENSG00000112242.10	HLTF	NA	ENSG00000071794.11	0.0131634	protein_coding	10.3092	5.83055	9.54802	protein_coding	26.8673	15.6333	26.0004
E2F3	ENSG00000112242.10	FOXN3	Forkhead	ENSG00000053254.11	0.0138286	protein_coding	27.663	22.1201	34.2645	protein_coding	26.8673	15.6333	26.0004
E2F3	ENSG00000112242.10	SMAD2	NA	ENSG00000175387.11	0.0109082	protein_coding	21.3528	16.7268	18.7465	protein_coding	26.8673	15.6333	26.0004
E2F3	ENSG00000112242.10	BACH2	bZIP	ENSG00000112182.10	0.0101786	protein_coding	49.8115	217.835	76.7515	protein_coding	26.8673	15.6333	26.0004
E2F3	ENSG00000112242.10	ZBTB7B	C2H2 ZF	ENSG00000160685.9	0.00705492	protein_coding	24.438	20.102	65.1258	protein_coding	26.8673	15.6333	26.0004
E2F3	ENSG00000112242.10	IRF2	IRF	ENSG00000168310.6	0.00958427	protein_coding	38.8138	22.4929	43.0542	protein_coding	26.8673	15.6333	26.0004
E2F3	ENSG00000112242.10	FOXJ3	Forkhead	ENSG00000198815.4	0.00721508	protein_coding	35.5573	47.1979	34.4884	protein_coding	26.8673	15.6333	26.0004
E2F3	ENSG00000112242.10	ELK4	Ets	ENSG00000158711.9	0.00921469	protein_coding	67.4856	107.039	70.1592	protein_coding	26.8673	15.6333	26.0004
SOX4	ENSG00000124766.4	NFATC1	Rel	ENSG00000131196.13	0.00768561	protein_coding	26.5075	58.5079	62.1764	protein_coding	6.87304	3.60192	2.03513
SOX4	ENSG00000124766.4	RUNX2	Runt	ENSG00000124813.16	0.00873059	protein_coding	6.0333	2.90249	1.44631	protein_coding	6.87304	3.60192	2.03513
SOX4	ENSG00000124766.4	THAP11	THAP finger	ENSG00000168286.1	0.00840111	protein_coding	44.1418	46.0762	84.2597	protein_coding	6.87304	3.60192	2.03513
SOX4	ENSG00000124766.4	ZNF384	C2H2 ZF	ENSG00000126746.13	0.00802619	protein_coding	26.7544	40.1547	40.9261	protein_coding	6.87304	3.60192	2.03513
E2F3	ENSG00000112242.10	TCF12	bHLH	ENSG00000140262.13	0.0143768	protein_coding	17.2377	15.075	18.308	protein_coding	26.8673	15.6333	26.0004
RUNX3	ENSG00000020633.14	VDR	Nuclear receptor	ENSG00000111424.6	0.00902033	protein_coding	3.51623	9.31279	32.3455	protein_coding	47.4684	73.1236	109.548
SOX4	ENSG00000124766.4	TFDP1	E2F	ENSG00000198176.8	0.00754094	protein_coding	10.5546	23.5774	99.2647	protein_coding	6.87304	3.60192	2.03513
SOX4	ENSG00000124766.4	RUNX3	Runt	ENSG00000020633.14	0.00721553	protein_coding	47.4684	73.1236	109.548	protein_coding	6.87304	3.60192	2.03513
RUNX3	ENSG00000020633.14	MLXIP	bHLH	ENSG00000175727.9	0.010202	protein_coding	38.3803	32.1952	21.9588	protein_coding	47.4684	73.1236	109.548
ZBTB12	ENSG00000204366.3	JUND	bZIP	ENSG00000130522.4	0.00735501	protein_coding	74.3572	109.809	180.846	protein_coding	4.70516	5.64622	9.58069
ZBTB12	ENSG00000204366.3	SMAD4	SMAD	ENSG00000141646.9	0.010852	protein_coding	13.9346	9.28591	7.65724	protein_coding	4.70516	5.64622	9.58069
ZBTB12	ENSG00000204366.3	KLF11	C2H2 ZF	ENSG00000172059.6	0.0193463	protein_coding	3.5389	6.49125	9.48579	protein_coding	4.70516	5.64622	9.58069
ZBTB12	ENSG00000204366.3	TFDP1	E2F	ENSG00000198176.8	0.0179153	protein_coding	10.5546	23.5774	99.2647	protein_coding	4.70516	5.64622	9.58069
ZBTB12	ENSG00000204366.3	ZNF148	NA	ENSG00000163848.14	0.0116486	protein_coding	16.9975	14.7542	13.1656	protein_coding	4.70516	5.64622	9.58069
ZBTB12	ENSG00000204366.3	NFIC	SMAD	ENSG00000141905.13	0.0138023	protein_coding	14.4289	14.8113	25.0569	protein_coding	4.70516	5.64622	9.58069
ZBTB12	ENSG00000204366.3	NR2F6	Nuclear receptor	ENSG00000160113.5	0.0102994	protein_coding	2.22949	6.45054	10.1467	protein_coding	4.70516	5.64622	9.58069
ZBTB12	ENSG00000204366.3	HMBOX1	Homeodomain	ENSG00000147421.13	0.0159124	protein_coding	23.4512	16.7878	14.3124	protein_coding	4.70516	5.64622	9.58069
ZBTB12	ENSG00000204366.3	CREB3	bZIP	ENSG00000107175.6	0.00706672	protein_coding	9.17368	6.9742	14.5769	protein_coding	4.70516	5.64622	9.58069
PBX2	ENSG00000204304.7	SP2	C2H2 ZF	ENSG00000167182.11	0.00725351	protein_coding	34.5701	58.9216	43.343	protein_coding	31.7444	13.5005	19.866
PBX2	ENSG00000204304.7	LEF1	Sox	ENSG00000138795.5	0.00742727	protein_coding	364.591	202.089	280.925	protein_coding	31.7444	13.5005	19.866
PBX2	ENSG00000204304.7	STAT4	STAT	ENSG00000138378.13	0.00924903	protein_coding	36.264	65.4242	65.4886	protein_coding	31.7444	13.5005	19.866
PBX2	ENSG00000204304.7	ATF3	bZIP	ENSG00000162772.12	0.00755477	protein_coding	1.83901	12.5986	5.37156	protein_coding	31.7444	13.5005	19.866
PBX2	ENSG00000204304.7	PPARD	Nuclear receptor	ENSG00000112033.9	0.0126706	protein_coding	32.9083	14.8801	18.8092	protein_coding	31.7444	13.5005	19.866
PBX2	ENSG00000204304.7	SNAI3	C2H2 ZF	ENSG00000185669.5	0.00747516	protein_coding	7.15207	2.50655	4.45566	protein_coding	31.7444	13.5005	19.866
PBX2	ENSG00000204304.7	ZBTB14	C2H2 ZF	ENSG00000198081.6	0.0103564	protein_coding	22.0902	8.83913	14.8651	protein_coding	31.7444	13.5005	19.866
PBX2	ENSG00000204304.7	ARID3B	ARID/BRIGHT	ENSG00000179361.13	0.0087346	protein_coding	10.7108	6.6985	7.73282	protein_coding	31.7444	13.5005	19.866
PBX2	ENSG00000204304.7	USF2	bHLH	ENSG00000105698.11	0.0089088	protein_coding	40.5727	17.8351	31.9485	protein_coding	31.7444	13.5005	19.866
RXRB	ENSG00000204231.6	NFATC3	Rel	ENSG00000072736.14	0.0117134	protein_coding	51.0818	34.6918	37.2125	protein_coding	35.4693	35.2471	33.4947
RXRB	ENSG00000204231.6	HIC2	C2H2 ZF	ENSG00000169635.5	0.00939244	protein_coding	6.41821	10.2589	5.99889	protein_coding	35.4693	35.2471	33.4947
RXRB	ENSG00000204231.6	TEAD4	TEA	ENSG00000197905.4	0.00815927	protein_coding	2.81377	3.24327	5.54252	protein_coding	35.4693	35.2471	33.4947
RXRB	ENSG00000204231.6	ETV6	Ets	ENSG00000139083.6	0.0190198	protein_coding	13.2511	14.9219	13.5622	protein_coding	35.4693	35.2471	33.4947
RXRB	ENSG00000204231.6	FOXJ3	Forkhead	ENSG00000198815.4	0.00791001	protein_coding	35.5573	47.1979	34.4884	protein_coding	35.4693	35.2471	33.4947
RXRB	ENSG00000204231.6	BHLHE40	bHLH	ENSG00000134107.4	0.0144537	protein_coding	3.3031	86.0234	145.299	protein_coding	35.4693	35.2471	33.4947
PPARD	ENSG00000112033.9	NFKB1	Rel	ENSG00000109320.7	0.00795953	protein_coding	29.1567	506.789	296.345	protein_coding	32.9083	14.8801	18.8092
PPARD	ENSG00000112033.9	RFX3	RFX	ENSG00000080298.11	0.0112414	protein_coding	8.42273	4.67247	4.49608	protein_coding	32.9083	14.8801	18.8092
PPARD	ENSG00000112033.9	KLF3	C2H2 ZF	ENSG00000109787.8	0.00885514	protein_coding	125.276	30.3117	18.848	protein_coding	32.9083	14.8801	18.8092
PPARD	ENSG00000112033.9	ZBTB14	C2H2 ZF	ENSG00000198081.6	0.0073503	protein_coding	22.0902	8.83913	14.8651	protein_coding	32.9083	14.8801	18.8092
PPARD	ENSG00000112033.9	PBX3	Homeodomain	ENSG00000167081.12	0.00713502	protein_coding	9.21206	5.42354	5.54844	protein_coding	32.9083	14.8801	18.8092
PPARD	ENSG00000112033.9	NR4A2	Nuclear receptor	ENSG00000153234.9	0.00931771	protein_coding	3.08795	132.95	51.2972	protein_coding	32.9083	14.8801	18.8092
PPARD	ENSG00000112033.9	ZNF317	C2H2 ZF	ENSG00000130803.10	0.00802256	protein_coding	15.4262	29.4555	27.1963	protein_coding	32.9083	14.8801	18.8092
PPARD	ENSG00000112033.9	KLF16	C2H2 ZF	ENSG00000129911.4	0.00788265	protein_coding	11.7561	43.2471	45.3241	protein_coding	32.9083	14.8801	18.8092
PPARD	ENSG00000112033.9	NR2C1	Nuclear receptor	ENSG00000120798.12	0.00728925	protein_coding	11.3642	5.96711	5.43842	protein_coding	32.9083	14.8801	18.8092
PPARD	ENSG00000112033.9	FOXO1	Forkhead	ENSG00000150907.6	0.00708956	protein_coding	94.0816	55.3038	49.5386	protein_coding	32.9083	14.8801	18.8092
PPARD	ENSG00000112033.9	MXI1	bHLH	ENSG00000119950.16	0.00833829	protein_coding	28.7737	21.687	11.6316	protein_coding	32.9083	14.8801	18.8092
PPARD	ENSG00000112033.9	EGR3	C2H2 ZF	ENSG00000179388.8	0.00896877	protein_coding	1.35095	132.127	45.4685	protein_coding	32.9083	14.8801	18.8092
PPARD	ENSG00000112033.9	ZNF384	C2H2 ZF	ENSG00000126746.13	0.00901387	protein_coding	26.7544	40.1547	40.9261	protein_coding	32.9083	14.8801	18.8092
RUNX3	ENSG00000020633.14	TGIF1	Homeodomain	ENSG00000177426.16	0.0108124	protein_coding	11.7375	22.7534	3.25931	protein_coding	47.4684	73.1236	109.548
NFYA	ENSG00000001167.10	HIF1A	bHLH	ENSG00000100644.12	0.00700583	protein_coding	37.8509	193.534	125.593	protein_coding	22.9157	43.4457	28.5316
NFYA	ENSG00000001167.10	ZNF460	C2H2 ZF	ENSG00000197714.4	0.0119369	protein_coding	31.8465	67.1283	30.8887	protein_coding	22.9157	43.4457	28.5316
NFYA	ENSG00000001167.10	ZBTB14	C2H2 ZF	ENSG00000198081.6	0.0107669	protein_coding	22.0902	8.83913	14.8651	protein_coding	22.9157	43.4457	28.5316
NFYA	ENSG00000001167.10	GABPA	Ets	ENSG00000154727.6	0.00824207	protein_coding	10.4451	16.6224	11.9009	protein_coding	22.9157	43.4457	28.5316
SRF	ENSG00000112658.6	RARA	Nuclear receptor	ENSG00000131759.13	0.0105496	protein_coding	25.5426	71.9467	62.8849	protein_coding	15.4137	64.2775	80.8318
SRF	ENSG00000112658.6	IRF1	IRF	ENSG00000125347.9	0.00734651	protein_coding	20.5275	150.134	102.101	protein_coding	15.4137	64.2775	80.8318
SRF	ENSG00000112658.6	STAT4	STAT	ENSG00000138378.13	0.00829133	protein_coding	36.264	65.4242	65.4886	protein_coding	15.4137	64.2775	80.8318
SRF	ENSG00000112658.6	STAT6	STAT	ENSG00000166888.6	0.00714506	protein_coding	68.1825	167.043	162.319	protein_coding	15.4137	64.2775	80.8318
SRF	ENSG00000112658.6	STAT1	STAT	ENSG00000115415.14	0.00720485	protein_coding	35.0834	445.774	430.889	protein_coding	15.4137	64.2775	80.8318
SRF	ENSG00000112658.6	KLF13	C2H2 ZF	ENSG00000169926.5	0.00849633	protein_coding	74.148	22.3999	42.3073	protein_coding	15.4137	64.2775	80.8318
SRF	ENSG00000112658.6	ELF2	Ets	ENSG00000109381.15	0.00715369	protein_coding	15.8982	8.39304	7.75401	protein_coding	15.4137	64.2775	80.8318
SRF	ENSG00000112658.6	ELK1	Ets	ENSG00000126767.13	0.00975539	protein_coding	18.6585	40.6808	59.8587	protein_coding	15.4137	64.2775	80.8318
SRF	ENSG00000112658.6	MAZ	C2H2 ZF	ENSG00000103495.9	0.00833873	protein_coding	71.6034	91.0371	189.127	protein_coding	15.4137	64.2775	80.8318
SRF	ENSG00000112658.6	RORA	Nuclear receptor	ENSG00000069667.11	0.0105177	protein_coding	23.2819	9.22455	1.52915	protein_coding	15.4137	64.2775	80.8318
SRF	ENSG00000112658.6	TFAP4	bHLH	ENSG00000090447.7	0.00763638	protein_coding	6.44111	12.8682	14.9109	protein_coding	15.4137	64.2775	80.8318
SRF	ENSG00000112658.6	NR4A1	Nuclear receptor	ENSG00000123358.15	0.0072024	protein_coding	1.8162	137.343	53.2826	protein_coding	15.4137	64.2775	80.8318
SRF	ENSG00000112658.6	RELB	Rel	ENSG00000104856.9	0.00719422	protein_coding	8.90223	122.195	61.4806	protein_coding	15.4137	64.2775	80.8318
SRF	ENSG00000112658.6	NFKB2	Rel	ENSG00000077150.13	0.00728206	protein_coding	22.2687	178.43	201.908	protein_coding	15.4137	64.2775	80.8318
NFYA	ENSG00000001167.10	RREB1	C2H2 ZF	ENSG00000124782.15	0.00758861	protein_coding	16.4582	21.8455	9.185	protein_coding	22.9157	43.4457	28.5316
NFYA	ENSG00000001167.10	NFATC2	Rel	ENSG00000101096.15	0.0106585	protein_coding	33.903	24.7075	33.2928	protein_coding	22.9157	43.4457	28.5316
RUNX2	ENSG00000124813.16	STAT2	STAT	ENSG00000170581.9	0.00756223	protein_coding	37.0243	34.4988	24.7853	protein_coding	6.0333	2.90249	1.44631
RUNX2	ENSG00000124813.16	IRF7	IRF	ENSG00000185507.15	0.00710289	protein_coding	18.8744	15.4072	9.72413	protein_coding	6.0333	2.90249	1.44631
RUNX2	ENSG00000124813.16	MEF2A	MADS box	ENSG00000068305.13	0.00901055	protein_coding	17.5747	16.3968	11.6467	protein_coding	6.0333	2.90249	1.44631
RUNX2	ENSG00000124813.16	TCF3	bHLH	ENSG00000071564.10	0.00727975	protein_coding	18.7774	32.7741	47.0143	protein_coding	6.0333	2.90249	1.44631
RUNX2	ENSG00000124813.16	GATA3	GATA	ENSG00000107485.11	0.00871273	protein_coding	27.0461	22.0926	11.966	protein_coding	6.0333	2.90249	1.44631
RUNX2	ENSG00000124813.16	POU2F1	Homeodomain,POU	ENSG00000143190.17	0.00817222	protein_coding	9.52221	8.55693	8.63923	protein_coding	6.0333	2.90249	1.44631
RUNX2	ENSG00000124813.16	SOX4	Sox	ENSG00000124766.4	0.00758578	protein_coding	6.87304	3.60192	2.03513	protein_coding	6.0333	2.90249	1.44631
RUNX2	ENSG00000124813.16	PLAG1	C2H2 ZF	ENSG00000181690.3	0.0116522	protein_coding	8.37695	2.21704	1.83645	protein_coding	6.0333	2.90249	1.44631
RUNX2	ENSG00000124813.16	VEZF1	C2H2 ZF	ENSG00000136451.4	0.0118789	protein_coding	35.7029	28.3574	20.778	protein_coding	6.0333	2.90249	1.44631
RUNX2	ENSG00000124813.16	SP4	C2H2 ZF	ENSG00000105866.9	0.0070646	protein_coding	25.1884	15.9254	18.3065	protein_coding	6.0333	2.90249	1.44631
RUNX2	ENSG00000124813.16	ZNF148	NA	ENSG00000163848.14	0.0136275	protein_coding	16.9975	14.7542	13.1656	protein_coding	6.0333	2.90249	1.44631
RUNX2	ENSG00000124813.16	MZF1	C2H2 ZF	ENSG00000099326.4	0.00747928	protein_coding	11.9589	11.2526	7.29446	protein_coding	6.0333	2.90249	1.44631
RUNX2	ENSG00000124813.16	ZNF652	C2H2 ZF	ENSG00000198740.4	0.0103834	protein_coding	24.2045	7.59965	3.95535	protein_coding	6.0333	2.90249	1.44631
RUNX2	ENSG00000124813.16	ZEB1	C2H2 ZF,Homeodomain	ENSG00000148516.17	0.00942577	protein_coding	30.5601	27.0703	15.1315	protein_coding	6.0333	2.90249	1.44631
ATF3	ENSG00000162772.12	ZBTB14	C2H2 ZF	ENSG00000198081.6	0.0129209	protein_coding	22.0902	8.83913	14.8651	protein_coding	1.83901	12.5986	5.37156
ATF3	ENSG00000162772.12	RFX1	RFX	ENSG00000132005.4	0.00877926	protein_coding	12.2825	7.71665	10.0227	protein_coding	1.83901	12.5986	5.37156
ATF3	ENSG00000162772.12	ZBTB7B	C2H2 ZF	ENSG00000160685.9	0.0147894	protein_coding	24.438	20.102	65.1258	protein_coding	1.83901	12.5986	5.37156
ATF3	ENSG00000162772.12	CTCF	C2H2 ZF	ENSG00000102974.10	0.00891857	protein_coding	50.6801	45.7903	69.2994	protein_coding	1.83901	12.5986	5.37156
ATF3	ENSG00000162772.12	BACH2	bZIP	ENSG00000112182.10	0.00732982	protein_coding	49.8115	217.835	76.7515	protein_coding	1.83901	12.5986	5.37156
ATF3	ENSG00000162772.12	NFYA	CBF/NF-Y	ENSG00000001167.10	0.00747483	protein_coding	22.9157	43.4457	28.5316	protein_coding	1.83901	12.5986	5.37156
ATF3	ENSG00000162772.12	NR4A2	Nuclear receptor	ENSG00000153234.9	0.0112658	protein_coding	3.08795	132.95	51.2972	protein_coding	1.83901	12.5986	5.37156
ATF3	ENSG00000162772.12	KLF6	C2H2 ZF	ENSG00000067082.10	0.00797304	protein_coding	20.002	29.0863	17.9519	protein_coding	1.83901	12.5986	5.37156
ATF3	ENSG00000162772.12	PPARA	Nuclear receptor	ENSG00000186951.12	0.00873657	protein_coding	5.8692	2.70244	4.58454	protein_coding	1.83901	12.5986	5.37156
ATF3	ENSG00000162772.12	NR1D1	Nuclear receptor	ENSG00000126368.5	0.00726601	protein_coding	19.4206	54.1854	31.3215	protein_coding	1.83901	12.5986	5.37156
BATF3	ENSG00000123685.4	RARG	Nuclear receptor	ENSG00000172819.12	0.00972469	protein_coding	16.4433	7.00141	13.5178	protein_coding	1.65811	41.5687	22.1585
ATF3	ENSG00000162772.12	BACH1	bZIP	ENSG00000156273.11	0.00924697	protein_coding	15.2362	29.6887	9.70708	protein_coding	1.83901	12.5986	5.37156
ATF3	ENSG00000162772.12	ELK4	Ets	ENSG00000158711.9	0.00700787	protein_coding	67.4856	107.039	70.1592	protein_coding	1.83901	12.5986	5.37156
ATF3	ENSG00000162772.12	MGA	bHLH,T-box	ENSG00000174197.12	0.00814083	protein_coding	21.4715	52.8379	27.0435	protein_coding	1.83901	12.5986	5.37156
ATF3	ENSG00000162772.12	ETV3	Ets	ENSG00000117036.7	0.00742528	protein_coding	12.9579	18.6252	12.707	protein_coding	1.83901	12.5986	5.37156
ATF3	ENSG00000162772.12	ZNF263	C2H2 ZF	ENSG00000006194.6	0.00750244	protein_coding	13.8496	19.5448	8.63775	protein_coding	1.83901	12.5986	5.37156
ATF3	ENSG00000162772.12	FOS	bZIP	ENSG00000170345.5	0.0106509	protein_coding	2.22869	22.6799	3.04045	protein_coding	1.83901	12.5986	5.37156
ATF3	ENSG00000162772.12	BCL6	C2H2 ZF	ENSG00000113916.13	0.00839252	protein_coding	4.17339	18.1066	5.56979	protein_coding	1.83901	12.5986	5.37156
ATF3	ENSG00000162772.12	FOXP1	Forkhead	ENSG00000114861.14	0.00888269	protein_coding	81.9274	148.688	90.0929	protein_coding	1.83901	12.5986	5.37156
ATF3	ENSG00000162772.12	FOXN3	Forkhead	ENSG00000053254.11	0.00729671	protein_coding	27.663	22.1201	34.2645	protein_coding	1.83901	12.5986	5.37156
ATF3	ENSG00000162772.12	NFATC2	Rel	ENSG00000101096.15	0.0123495	protein_coding	33.903	24.7075	33.2928	protein_coding	1.83901	12.5986	5.37156
ATF3	ENSG00000162772.12	FOXJ2	Forkhead	ENSG00000065970.4	0.0153698	protein_coding	22.3937	14.2572	23.246	protein_coding	1.83901	12.5986	5.37156
ATF3	ENSG00000162772.12	SMAD2	NA	ENSG00000175387.11	0.00743651	protein_coding	21.3528	16.7268	18.7465	protein_coding	1.83901	12.5986	5.37156
ATF3	ENSG00000162772.12	SP2	C2H2 ZF	ENSG00000167182.11	0.00748186	protein_coding	34.5701	58.9216	43.343	protein_coding	1.83901	12.5986	5.37156
ATF3	ENSG00000162772.12	ZBTB6	C2H2 ZF	ENSG00000186130.4	0.00917469	protein_coding	14.1741	21.0704	12.5025	protein_coding	1.83901	12.5986	5.37156
BATF3	ENSG00000123685.4	PBX2	Homeodomain	ENSG00000204304.7	0.011383	protein_coding	31.7444	13.5005	19.866	protein_coding	1.65811	41.5687	22.1585
BATF3	ENSG00000123685.4	ELF2	Ets	ENSG00000109381.15	0.016984	protein_coding	15.8982	8.39304	7.75401	protein_coding	1.65811	41.5687	22.1585
BATF3	ENSG00000123685.4	CTCF	C2H2 ZF	ENSG00000102974.10	0.0100585	protein_coding	50.6801	45.7903	69.2994	protein_coding	1.65811	41.5687	22.1585
ATF3	ENSG00000162772.12	IRF1	IRF	ENSG00000125347.9	0.00920856	protein_coding	20.5275	150.134	102.101	protein_coding	1.83901	12.5986	5.37156
BATF3	ENSG00000123685.4	ETS1	Ets	ENSG00000134954.10	0.0138705	protein_coding	452.612	162.87	218.837	protein_coding	1.65811	41.5687	22.1585
BATF3	ENSG00000123685.4	MEF2D	MADS box	ENSG00000116604.13	0.0126337	protein_coding	36.798	25.1847	25.5343	protein_coding	1.65811	41.5687	22.1585
BATF3	ENSG00000123685.4	NFATC3	Rel	ENSG00000072736.14	0.0125689	protein_coding	51.0818	34.6918	37.2125	protein_coding	1.65811	41.5687	22.1585
BACH2	ENSG00000112182.10	HLTF	NA	ENSG00000071794.11	0.0139735	protein_coding	10.3092	5.83055	9.54802	protein_coding	49.8115	217.835	76.7515
BACH2	ENSG00000112182.10	FOSL1	bZIP	ENSG00000175592.4	0.00985238	protein_coding	1.60479	151.689	60.6658	protein_coding	49.8115	217.835	76.7515
BACH2	ENSG00000112182.10	ATF3	bZIP	ENSG00000162772.12	0.00734478	protein_coding	1.83901	12.5986	5.37156	protein_coding	49.8115	217.835	76.7515
BACH2	ENSG00000112182.10	E2F6	E2F	ENSG00000169016.12	0.00712038	protein_coding	2.84755	10.2704	6.21233	protein_coding	49.8115	217.835	76.7515
BACH2	ENSG00000112182.10	MNT	bHLH	ENSG00000070444.10	0.00867556	protein_coding	13.6034	20.317	11.22	protein_coding	49.8115	217.835	76.7515
BACH2	ENSG00000112182.10	FOS	bZIP	ENSG00000170345.5	0.0108299	protein_coding	2.22869	22.6799	3.04045	protein_coding	49.8115	217.835	76.7515
BACH2	ENSG00000112182.10	KLF9	C2H2 ZF	ENSG00000119138.3	0.00836272	protein_coding	14.7466	42.3805	19.3454	protein_coding	49.8115	217.835	76.7515
BACH2	ENSG00000112182.10	KLF10	C2H2 ZF	ENSG00000155090.10	0.00822594	protein_coding	2.98347	101.32	25.2161	protein_coding	49.8115	217.835	76.7515
BACH2	ENSG00000112182.10	NR4A2	Nuclear receptor	ENSG00000153234.9	0.0106513	protein_coding	3.08795	132.95	51.2972	protein_coding	49.8115	217.835	76.7515
BACH2	ENSG00000112182.10	NFATC2	Rel	ENSG00000101096.15	0.0116148	protein_coding	33.903	24.7075	33.2928	protein_coding	49.8115	217.835	76.7515
BACH2	ENSG00000112182.10	MAFK	bZIP	ENSG00000198517.5	0.00981375	protein_coding	7.86877	20.1437	11.0981	protein_coding	49.8115	217.835	76.7515
BACH2	ENSG00000112182.10	PRDM15	NA	ENSG00000141956.9	0.0089183	protein_coding	4.15744	9.23077	6.49964	protein_coding	49.8115	217.835	76.7515
BACH2	ENSG00000112182.10	MAFG	bZIP	ENSG00000197063.6	0.0129398	protein_coding	5.59852	24.4516	19.1702	protein_coding	49.8115	217.835	76.7515
BACH2	ENSG00000112182.10	FOXJ3	Forkhead	ENSG00000198815.4	0.0105345	protein_coding	35.5573	47.1979	34.4884	protein_coding	49.8115	217.835	76.7515
BACH2	ENSG00000112182.10	LIN54	TCR/CxC	ENSG00000189308.6	0.00759182	protein_coding	8.21127	3.97463	10.4772	protein_coding	49.8115	217.835	76.7515
BACH2	ENSG00000112182.10	CEBPG	bZIP	ENSG00000153879.4	0.0127867	protein_coding	9.95546	26.2151	15.8662	protein_coding	49.8115	217.835	76.7515
BACH2	ENSG00000112182.10	NFIL3	bZIP	ENSG00000165030.3	0.0111226	protein_coding	2.9022	11.3432	3.81128	protein_coding	49.8115	217.835	76.7515
BACH2	ENSG00000112182.10	USF2	bHLH	ENSG00000105698.11	0.00860919	protein_coding	40.5727	17.8351	31.9485	protein_coding	49.8115	217.835	76.7515
BACH2	ENSG00000112182.10	BCL6	C2H2 ZF	ENSG00000113916.13	0.00767614	protein_coding	4.17339	18.1066	5.56979	protein_coding	49.8115	217.835	76.7515
BACH2	ENSG00000112182.10	STAT5A	STAT	ENSG00000126561.12	0.00998982	protein_coding	36.4983	316.372	118.146	protein_coding	49.8115	217.835	76.7515
BACH2	ENSG00000112182.10	GABPA	Ets	ENSG00000154727.6	0.00772844	protein_coding	10.4451	16.6224	11.9009	protein_coding	49.8115	217.835	76.7515
BACH2	ENSG00000112182.10	AHR	bHLH	ENSG00000106546.8	0.0119534	protein_coding	9.41274	93.4629	53.6691	protein_coding	49.8115	217.835	76.7515
BACH2	ENSG00000112182.10	PPARA	Nuclear receptor	ENSG00000186951.12	0.00767768	protein_coding	5.8692	2.70244	4.58454	protein_coding	49.8115	217.835	76.7515
BACH2	ENSG00000112182.10	DDIT3	bZIP	ENSG00000175197.6	0.00783381	protein_coding	12.2974	35.3201	14.9946	protein_coding	49.8115	217.835	76.7515
BACH2	ENSG00000112182.10	SP2	C2H2 ZF	ENSG00000167182.11	0.0104219	protein_coding	34.5701	58.9216	43.343	protein_coding	49.8115	217.835	76.7515
BACH2	ENSG00000112182.10	GFI1	C2H2 ZF	ENSG00000162676.7	0.00707367	protein_coding	10.0452	202.356	83.9047	protein_coding	49.8115	217.835	76.7515
BACH2	ENSG00000112182.10	PRDM1	C2H2 ZF	ENSG00000057657.10	0.00724654	protein_coding	1.80343	5.61797	1.2626	protein_coding	49.8115	217.835	76.7515
BACH2	ENSG00000112182.10	TGIF1	Homeodomain	ENSG00000177426.16	0.0117425	protein_coding	11.7375	22.7534	3.25931	protein_coding	49.8115	217.835	76.7515
BACH2	ENSG00000112182.10	ZBTB6	C2H2 ZF	ENSG00000186130.4	0.0094188	protein_coding	14.1741	21.0704	12.5025	protein_coding	49.8115	217.835	76.7515
BACH2	ENSG00000112182.10	PKNOX1	Homeodomain	ENSG00000160199.10	0.00737833	protein_coding	6.08803	12.0409	6.80785	protein_coding	49.8115	217.835	76.7515
BACH2	ENSG00000112182.10	MGA	bHLH,T-box	ENSG00000174197.12	0.0109986	protein_coding	21.4715	52.8379	27.0435	protein_coding	49.8115	217.835	76.7515
BACH2	ENSG00000112182.10	ZNF140	C2H2 ZF	ENSG00000196387.5	0.0162764	protein_coding	7.55863	11.9829	6.05519	protein_coding	49.8115	217.835	76.7515
BACH2	ENSG00000112182.10	CEBPB	bZIP	ENSG00000172216.4	0.00791161	protein_coding	13.8991	21.8187	11.2238	protein_coding	49.8115	217.835	76.7515
BACH2	ENSG00000112182.10	RELB	Rel	ENSG00000104856.9	0.00995748	protein_coding	8.90223	122.195	61.4806	protein_coding	49.8115	217.835	76.7515
BACH2	ENSG00000112182.10	NFYA	CBF/NF-Y	ENSG00000001167.10	0.0117439	protein_coding	22.9157	43.4457	28.5316	protein_coding	49.8115	217.835	76.7515
BACH2	ENSG00000112182.10	IRF2	IRF	ENSG00000168310.6	0.00929274	protein_coding	38.8138	22.4929	43.0542	protein_coding	49.8115	217.835	76.7515
BACH2	ENSG00000112182.10	ZBTB7B	C2H2 ZF	ENSG00000160685.9	0.00786714	protein_coding	24.438	20.102	65.1258	protein_coding	49.8115	217.835	76.7515
BACH2	ENSG00000112182.10	ELF4	Ets	ENSG00000102034.12	0.00936045	protein_coding	26.4618	20.1657	33.0515	protein_coding	49.8115	217.835	76.7515
BACH2	ENSG00000112182.10	ELK4	Ets	ENSG00000158711.9	0.0074078	protein_coding	67.4856	107.039	70.1592	protein_coding	49.8115	217.835	76.7515
BACH2	ENSG00000112182.10	NRF1	Unknown	ENSG00000106459.10	0.013718	protein_coding	12.1101	19.1807	7.90798	protein_coding	49.8115	217.835	76.7515
BACH2	ENSG00000112182.10	EGR2	C2H2 ZF	ENSG00000122877.9	0.00896544	protein_coding	2.12493	158.341	31.8664	protein_coding	49.8115	217.835	76.7515
PRDM1	ENSG00000057657.10	HLTF	NA	ENSG00000071794.11	0.0115823	protein_coding	10.3092	5.83055	9.54802	protein_coding	1.80343	5.61797	1.2626
PRDM1	ENSG00000057657.10	SMAD2	NA	ENSG00000175387.11	0.011271	protein_coding	21.3528	16.7268	18.7465	protein_coding	1.80343	5.61797	1.2626
PRDM1	ENSG00000057657.10	RFX1	RFX	ENSG00000132005.4	0.0102083	protein_coding	12.2825	7.71665	10.0227	protein_coding	1.80343	5.61797	1.2626
PRDM1	ENSG00000057657.10	RARG	Nuclear receptor	ENSG00000172819.12	0.00770884	protein_coding	16.4433	7.00141	13.5178	protein_coding	1.80343	5.61797	1.2626
PRDM1	ENSG00000057657.10	FOXJ2	Forkhead	ENSG00000065970.4	0.00751441	protein_coding	22.3937	14.2572	23.246	protein_coding	1.80343	5.61797	1.2626
PRDM1	ENSG00000057657.10	FOXN3	Forkhead	ENSG00000053254.11	0.0132	protein_coding	27.663	22.1201	34.2645	protein_coding	1.80343	5.61797	1.2626
PRDM1	ENSG00000057657.10	IRF3	IRF	ENSG00000126456.11	0.00993774	protein_coding	26.1248	12.3178	23.4694	protein_coding	1.80343	5.61797	1.2626
PRDM1	ENSG00000057657.10	NFATC3	Rel	ENSG00000072736.14	0.0103553	protein_coding	51.0818	34.6918	37.2125	protein_coding	1.80343	5.61797	1.2626
PRDM1	ENSG00000057657.10	CTCF	C2H2 ZF	ENSG00000102974.10	0.014415	protein_coding	50.6801	45.7903	69.2994	protein_coding	1.80343	5.61797	1.2626
PRDM1	ENSG00000057657.10	ARNT	bHLH	ENSG00000143437.16	0.00846559	protein_coding	23.8486	13.5725	25.4699	protein_coding	1.80343	5.61797	1.2626
PRDM1	ENSG00000057657.10	USF2	bHLH	ENSG00000105698.11	0.00860953	protein_coding	40.5727	17.8351	31.9485	protein_coding	1.80343	5.61797	1.2626
PRDM1	ENSG00000057657.10	USF1	bHLH	ENSG00000158773.10	0.0114154	protein_coding	34.2107	23.7808	35.5404	protein_coding	1.80343	5.61797	1.2626
PRDM1	ENSG00000057657.10	ZBTB14	C2H2 ZF	ENSG00000198081.6	0.00750152	protein_coding	22.0902	8.83913	14.8651	protein_coding	1.80343	5.61797	1.2626
PRDM1	ENSG00000057657.10	ELF4	Ets	ENSG00000102034.12	0.00831	protein_coding	26.4618	20.1657	33.0515	protein_coding	1.80343	5.61797	1.2626
PRDM1	ENSG00000057657.10	TCFL5	bHLH	ENSG00000101190.8	0.0127386	protein_coding	7.68045	6.17238	7.05429	protein_coding	1.80343	5.61797	1.2626
PRDM1	ENSG00000057657.10	MAX	bHLH	ENSG00000125952.14	0.0116333	protein_coding	63.3841	54.8169	59.4813	protein_coding	1.80343	5.61797	1.2626
PRDM1	ENSG00000057657.10	MNT	bHLH	ENSG00000070444.10	0.00784385	protein_coding	13.6034	20.317	11.22	protein_coding	1.80343	5.61797	1.2626
PRDM1	ENSG00000057657.10	SP3	C2H2 ZF	ENSG00000172845.9	0.0171902	protein_coding	25.2192	19.597	24.3094	protein_coding	1.80343	5.61797	1.2626
PRDM1	ENSG00000057657.10	PPARA	Nuclear receptor	ENSG00000186951.12	0.00920471	protein_coding	5.8692	2.70244	4.58454	protein_coding	1.80343	5.61797	1.2626
PRDM1	ENSG00000057657.10	MGA	bHLH,T-box	ENSG00000174197.12	0.00728908	protein_coding	21.4715	52.8379	27.0435	protein_coding	1.80343	5.61797	1.2626
PRDM1	ENSG00000057657.10	EGR3	C2H2 ZF	ENSG00000179388.8	0.00739307	protein_coding	1.35095	132.127	45.4685	protein_coding	1.80343	5.61797	1.2626
PRDM1	ENSG00000057657.10	LIN54	TCR/CxC	ENSG00000189308.6	0.00971551	protein_coding	8.21127	3.97463	10.4772	protein_coding	1.80343	5.61797	1.2626
FOXO3	ENSG00000118689.10	STAT6	STAT	ENSG00000166888.6	0.00763696	protein_coding	68.1825	167.043	162.319	protein_coding	9.87318	6.89084	3.15724
FOXO3	ENSG00000118689.10	ZNF341	C2H2 ZF	ENSG00000131061.9	0.00791901	protein_coding	4.7502	6.20738	8.51451	protein_coding	9.87318	6.89084	3.15724
MYB	ENSG00000118513.14	NFAT5	Rel	ENSG00000102908.16	0.0160243	protein_coding	13.1549	54.2287	31.9488	protein_coding	8.9003	38.6206	20.9037
MYB	ENSG00000118513.14	HIC2	C2H2 ZF	ENSG00000169635.5	0.0120343	protein_coding	6.41821	10.2589	5.99889	protein_coding	8.9003	38.6206	20.9037
MYB	ENSG00000118513.14	LEF1	Sox	ENSG00000138795.5	0.0081144	protein_coding	364.591	202.089	280.925	protein_coding	8.9003	38.6206	20.9037
MYB	ENSG00000118513.14	KLF10	C2H2 ZF	ENSG00000155090.10	0.0116846	protein_coding	2.98347	101.32	25.2161	protein_coding	8.9003	38.6206	20.9037
MYB	ENSG00000118513.14	RELB	Rel	ENSG00000104856.9	0.0113165	protein_coding	8.90223	122.195	61.4806	protein_coding	8.9003	38.6206	20.9037
MYB	ENSG00000118513.14	REL	Rel	ENSG00000162924.9	0.0117859	protein_coding	8.38764	216.888	56.7033	protein_coding	8.9003	38.6206	20.9037
MYB	ENSG00000118513.14	ZNF460	C2H2 ZF	ENSG00000197714.4	0.0140818	protein_coding	31.8465	67.1283	30.8887	protein_coding	8.9003	38.6206	20.9037
MYB	ENSG00000118513.14	RFX1	RFX	ENSG00000132005.4	0.0125381	protein_coding	12.2825	7.71665	10.0227	protein_coding	8.9003	38.6206	20.9037
MYB	ENSG00000118513.14	FOS	bZIP	ENSG00000170345.5	0.0135298	protein_coding	2.22869	22.6799	3.04045	protein_coding	8.9003	38.6206	20.9037
MYB	ENSG00000118513.14	FOSL1	bZIP	ENSG00000175592.4	0.0108369	protein_coding	1.60479	151.689	60.6658	protein_coding	8.9003	38.6206	20.9037
MYB	ENSG00000118513.14	FOSB	bZIP	ENSG00000125740.9	0.00952124	protein_coding	1.38153	14.6115	1.57442	protein_coding	8.9003	38.6206	20.9037
MYB	ENSG00000118513.14	PKNOX1	Homeodomain	ENSG00000160199.10	0.0140786	protein_coding	6.08803	12.0409	6.80785	protein_coding	8.9003	38.6206	20.9037
MYB	ENSG00000118513.14	AHR	bHLH	ENSG00000106546.8	0.0129473	protein_coding	9.41274	93.4629	53.6691	protein_coding	8.9003	38.6206	20.9037
MYB	ENSG00000118513.14	NR4A2	Nuclear receptor	ENSG00000153234.9	0.00742994	protein_coding	3.08795	132.95	51.2972	protein_coding	8.9003	38.6206	20.9037
MYB	ENSG00000118513.14	IRF1	IRF	ENSG00000125347.9	0.00946217	protein_coding	20.5275	150.134	102.101	protein_coding	8.9003	38.6206	20.9037
MYB	ENSG00000118513.14	HOXB2	Homeodomain	ENSG00000173917.9	0.00791194	protein_coding	12.5784	5.49332	7.7556	protein_coding	8.9003	38.6206	20.9037
MYB	ENSG00000118513.14	FOXP1	Forkhead	ENSG00000114861.14	0.0114819	protein_coding	81.9274	148.688	90.0929	protein_coding	8.9003	38.6206	20.9037
MYB	ENSG00000118513.14	FOXJ2	Forkhead	ENSG00000065970.4	0.0119761	protein_coding	22.3937	14.2572	23.246	protein_coding	8.9003	38.6206	20.9037
MYB	ENSG00000118513.14	HLTF	NA	ENSG00000071794.11	0.00709455	protein_coding	10.3092	5.83055	9.54802	protein_coding	8.9003	38.6206	20.9037
MYB	ENSG00000118513.14	ZNF281	C2H2 ZF	ENSG00000162702.7	0.00840861	protein_coding	19.3751	26.911	17.9295	protein_coding	8.9003	38.6206	20.9037
MYB	ENSG00000118513.14	DDIT3	bZIP	ENSG00000175197.6	0.0157604	protein_coding	12.2974	35.3201	14.9946	protein_coding	8.9003	38.6206	20.9037
MYB	ENSG00000118513.14	FLI1	Ets	ENSG00000151702.12	0.0100323	protein_coding	25.0796	8.22835	13.354	protein_coding	8.9003	38.6206	20.9037
MYB	ENSG00000118513.14	IRF3	IRF	ENSG00000126456.11	0.0145646	protein_coding	26.1248	12.3178	23.4694	protein_coding	8.9003	38.6206	20.9037
MYB	ENSG00000118513.14	MAFG	bZIP	ENSG00000197063.6	0.0124517	protein_coding	5.59852	24.4516	19.1702	protein_coding	8.9003	38.6206	20.9037
TBP	ENSG00000112592.8	KLF16	C2H2 ZF	ENSG00000129911.4	0.00980425	protein_coding	11.7561	43.2471	45.3241	protein_coding	19.5031	32.1191	37.229
TBP	ENSG00000112592.8	KLF2	C2H2 ZF	ENSG00000127528.5	0.00701592	protein_coding	643.228	77.5309	3.57086	protein_coding	19.5031	32.1191	37.229
TBP	ENSG00000112592.8	ERF	Ets	ENSG00000105722.5	0.00878913	protein_coding	16.4224	54.4922	63.5516	protein_coding	19.5031	32.1191	37.229
TBP	ENSG00000112592.8	ETS2	Ets	ENSG00000157557.7	0.00780736	protein_coding	7.37297	30.5099	26.3494	protein_coding	19.5031	32.1191	37.229
TBP	ENSG00000112592.8	TFAP4	bHLH	ENSG00000090447.7	0.00835918	protein_coding	6.44111	12.8682	14.9109	protein_coding	19.5031	32.1191	37.229
TBP	ENSG00000112592.8	ZBTB18	C2H2 ZF	ENSG00000179456.9	0.00788139	protein_coding	104.724	28.3132	11.2869	protein_coding	19.5031	32.1191	37.229
TBP	ENSG00000112592.8	HSF1	HSF	ENSG00000185122.6	0.00709065	protein_coding	21.9018	36.086	47.0488	protein_coding	19.5031	32.1191	37.229
TBP	ENSG00000112592.8	NR2C1	Nuclear receptor	ENSG00000120798.12	0.00794415	protein_coding	11.3642	5.96711	5.43842	protein_coding	19.5031	32.1191	37.229
TBP	ENSG00000112592.8	ZNF740	C2H2 ZF	ENSG00000139651.9	0.00785976	protein_coding	30.1018	20.8814	16.9006	protein_coding	19.5031	32.1191	37.229
MAFK	ENSG00000198517.5	ETS2	Ets	ENSG00000157557.7	0.0119344	protein_coding	7.37297	30.5099	26.3494	protein_coding	7.86877	20.1437	11.0981
MAFK	ENSG00000198517.5	ETV3	Ets	ENSG00000117036.7	0.00747159	protein_coding	12.9579	18.6252	12.707	protein_coding	7.86877	20.1437	11.0981
MAFK	ENSG00000198517.5	NRF1	Unknown	ENSG00000106459.10	0.00733773	protein_coding	12.1101	19.1807	7.90798	protein_coding	7.86877	20.1437	11.0981
MAFK	ENSG00000198517.5	TCF12	bHLH	ENSG00000140262.13	0.00918857	protein_coding	17.2377	15.075	18.308	protein_coding	7.86877	20.1437	11.0981
MAFK	ENSG00000198517.5	ZNF460	C2H2 ZF	ENSG00000197714.4	0.00700848	protein_coding	31.8465	67.1283	30.8887	protein_coding	7.86877	20.1437	11.0981
MAFK	ENSG00000198517.5	PPARA	Nuclear receptor	ENSG00000186951.12	0.0122735	protein_coding	5.8692	2.70244	4.58454	protein_coding	7.86877	20.1437	11.0981
MAFK	ENSG00000198517.5	FOXK1	Forkhead	ENSG00000164916.9	0.00997044	protein_coding	29.2615	39.2605	34.7856	protein_coding	7.86877	20.1437	11.0981
MAFK	ENSG00000198517.5	MGA	bHLH,T-box	ENSG00000174197.12	0.00889027	protein_coding	21.4715	52.8379	27.0435	protein_coding	7.86877	20.1437	11.0981
MAFK	ENSG00000198517.5	AHR	bHLH	ENSG00000106546.8	0.0125615	protein_coding	9.41274	93.4629	53.6691	protein_coding	7.86877	20.1437	11.0981
MAFK	ENSG00000198517.5	ARNT	bHLH	ENSG00000143437.16	0.00824928	protein_coding	23.8486	13.5725	25.4699	protein_coding	7.86877	20.1437	11.0981
MAFK	ENSG00000198517.5	NFKB1	Rel	ENSG00000109320.7	0.0134925	protein_coding	29.1567	506.789	296.345	protein_coding	7.86877	20.1437	11.0981
MAFK	ENSG00000198517.5	KLF6	C2H2 ZF	ENSG00000067082.10	0.00816261	protein_coding	20.002	29.0863	17.9519	protein_coding	7.86877	20.1437	11.0981
MAFK	ENSG00000198517.5	SP3	C2H2 ZF	ENSG00000172845.9	0.00751246	protein_coding	25.2192	19.597	24.3094	protein_coding	7.86877	20.1437	11.0981
MAFK	ENSG00000198517.5	ZNF317	C2H2 ZF	ENSG00000130803.10	0.0105063	protein_coding	15.4262	29.4555	27.1963	protein_coding	7.86877	20.1437	11.0981
MAFK	ENSG00000198517.5	FOSL2	bZIP	ENSG00000075426.7	0.00749479	protein_coding	2.97949	68.8857	12.7455	protein_coding	7.86877	20.1437	11.0981
MAFK	ENSG00000198517.5	MAFF	bZIP	ENSG00000185022.7	0.00829061	protein_coding	4.04945	8.48979	4.91597	protein_coding	7.86877	20.1437	11.0981
MAFK	ENSG00000198517.5	FOXN3	Forkhead	ENSG00000053254.11	0.0101375	protein_coding	27.663	22.1201	34.2645	protein_coding	7.86877	20.1437	11.0981
MAFK	ENSG00000198517.5	REL	Rel	ENSG00000162924.9	0.00928525	protein_coding	8.38764	216.888	56.7033	protein_coding	7.86877	20.1437	11.0981
MAFK	ENSG00000198517.5	FOXJ3	Forkhead	ENSG00000198815.4	0.00739104	protein_coding	35.5573	47.1979	34.4884	protein_coding	7.86877	20.1437	11.0981
MAFK	ENSG00000198517.5	FOXP1	Forkhead	ENSG00000114861.14	0.0146785	protein_coding	81.9274	148.688	90.0929	protein_coding	7.86877	20.1437	11.0981
MAFK	ENSG00000198517.5	STAT5A	STAT	ENSG00000126561.12	0.00733341	protein_coding	36.4983	316.372	118.146	protein_coding	7.86877	20.1437	11.0981
MAFK	ENSG00000198517.5	IRF4	IRF	ENSG00000137265.10	0.0128336	protein_coding	5.6988	783.89	464.786	protein_coding	7.86877	20.1437	11.0981
MAFK	ENSG00000198517.5	EGR2	C2H2 ZF	ENSG00000122877.9	0.00908219	protein_coding	2.12493	158.341	31.8664	protein_coding	7.86877	20.1437	11.0981
MAFK	ENSG00000198517.5	MNT	bHLH	ENSG00000070444.10	0.00925645	protein_coding	13.6034	20.317	11.22	protein_coding	7.86877	20.1437	11.0981
MAFK	ENSG00000198517.5	KLF13	C2H2 ZF	ENSG00000169926.5	0.00929313	protein_coding	74.148	22.3999	42.3073	protein_coding	7.86877	20.1437	11.0981
MAFK	ENSG00000198517.5	RARG	Nuclear receptor	ENSG00000172819.12	0.00788648	protein_coding	16.4433	7.00141	13.5178	protein_coding	7.86877	20.1437	11.0981
MAFK	ENSG00000198517.5	NFYA	CBF/NF-Y	ENSG00000001167.10	0.00853126	protein_coding	22.9157	43.4457	28.5316	protein_coding	7.86877	20.1437	11.0981
MAFK	ENSG00000198517.5	HIF1A	bHLH	ENSG00000100644.12	0.00830363	protein_coding	37.8509	193.534	125.593	protein_coding	7.86877	20.1437	11.0981
MAFK	ENSG00000198517.5	NFE2L2	bZIP	ENSG00000116044.11	0.0104481	protein_coding	43.1876	100.955	67.5731	protein_coding	7.86877	20.1437	11.0981
MAFK	ENSG00000198517.5	NFIX	SMAD	ENSG00000008441.12	0.0076317	protein_coding	4.02934	24.3211	14.9281	protein_coding	7.86877	20.1437	11.0981
MAFK	ENSG00000198517.5	SP2	C2H2 ZF	ENSG00000167182.11	0.00718806	protein_coding	34.5701	58.9216	43.343	protein_coding	7.86877	20.1437	11.0981
MAFK	ENSG00000198517.5	SNAI3	C2H2 ZF	ENSG00000185669.5	0.00775887	protein_coding	7.15207	2.50655	4.45566	protein_coding	7.86877	20.1437	11.0981
FOXK1	ENSG00000164916.9	NFYA	CBF/NF-Y	ENSG00000001167.10	0.00739385	protein_coding	22.9157	43.4457	28.5316	protein_coding	29.2615	39.2605	34.7856
FOXK1	ENSG00000164916.9	MYB	Myb/SANT	ENSG00000118513.14	0.00725768	protein_coding	8.9003	38.6206	20.9037	protein_coding	29.2615	39.2605	34.7856
FOXK1	ENSG00000164916.9	FOSL1	bZIP	ENSG00000175592.4	0.00719267	protein_coding	1.60479	151.689	60.6658	protein_coding	29.2615	39.2605	34.7856
FOXK1	ENSG00000164916.9	FOSL2	bZIP	ENSG00000075426.7	0.00768635	protein_coding	2.97949	68.8857	12.7455	protein_coding	29.2615	39.2605	34.7856
FOXK1	ENSG00000164916.9	CEBPG	bZIP	ENSG00000153879.4	0.00838031	protein_coding	9.95546	26.2151	15.8662	protein_coding	29.2615	39.2605	34.7856
FOXK1	ENSG00000164916.9	MYC	bHLH	ENSG00000136997.10	0.00754133	protein_coding	102.767	1095.75	648.817	protein_coding	29.2615	39.2605	34.7856
FOXK1	ENSG00000164916.9	FOXK2	Forkhead	ENSG00000141568.15	0.00819237	protein_coding	14.4827	45.2678	41.1481	protein_coding	29.2615	39.2605	34.7856
FOXK1	ENSG00000164916.9	E2F6	E2F	ENSG00000169016.12	0.00742085	protein_coding	2.84755	10.2704	6.21233	protein_coding	29.2615	39.2605	34.7856
FOXK1	ENSG00000164916.9	ATF3	bZIP	ENSG00000162772.12	0.0104785	protein_coding	1.83901	12.5986	5.37156	protein_coding	29.2615	39.2605	34.7856
FOXK1	ENSG00000164916.9	IRF4	IRF	ENSG00000137265.10	0.00958909	protein_coding	5.6988	783.89	464.786	protein_coding	29.2615	39.2605	34.7856
FOXK1	ENSG00000164916.9	IRF1	IRF	ENSG00000125347.9	0.00720122	protein_coding	20.5275	150.134	102.101	protein_coding	29.2615	39.2605	34.7856
FOXK1	ENSG00000164916.9	MTF1	C2H2 ZF	ENSG00000188786.9	0.00715514	protein_coding	10.1249	31.2324	26.6528	protein_coding	29.2615	39.2605	34.7856
FOXK1	ENSG00000164916.9	STAT5A	STAT	ENSG00000126561.12	0.00860153	protein_coding	36.4983	316.372	118.146	protein_coding	29.2615	39.2605	34.7856
FOXK1	ENSG00000164916.9	NFE2L2	bZIP	ENSG00000116044.11	0.00732054	protein_coding	43.1876	100.955	67.5731	protein_coding	29.2615	39.2605	34.7856
FOXK1	ENSG00000164916.9	NR1D1	Nuclear receptor	ENSG00000126368.5	0.00725513	protein_coding	19.4206	54.1854	31.3215	protein_coding	29.2615	39.2605	34.7856
FOXK1	ENSG00000164916.9	PPARA	Nuclear receptor	ENSG00000186951.12	0.00749506	protein_coding	5.8692	2.70244	4.58454	protein_coding	29.2615	39.2605	34.7856
FOXK1	ENSG00000164916.9	GFI1	C2H2 ZF	ENSG00000162676.7	0.00960898	protein_coding	10.0452	202.356	83.9047	protein_coding	29.2615	39.2605	34.7856
FOXK1	ENSG00000164916.9	REL	Rel	ENSG00000162924.9	0.00716274	protein_coding	8.38764	216.888	56.7033	protein_coding	29.2615	39.2605	34.7856
AHR	ENSG00000106546.8	EGR1	C2H2 ZF	ENSG00000120738.7	0.00703818	protein_coding	2.10936	136.228	76.4968	protein_coding	9.41274	93.4629	53.6691
AHR	ENSG00000106546.8	NFYA	CBF/NF-Y	ENSG00000001167.10	0.0105137	protein_coding	22.9157	43.4457	28.5316	protein_coding	9.41274	93.4629	53.6691
AHR	ENSG00000106546.8	ZNF460	C2H2 ZF	ENSG00000197714.4	0.0128955	protein_coding	31.8465	67.1283	30.8887	protein_coding	9.41274	93.4629	53.6691
AHR	ENSG00000106546.8	REL	Rel	ENSG00000162924.9	0.00783009	protein_coding	8.38764	216.888	56.7033	protein_coding	9.41274	93.4629	53.6691
AHR	ENSG00000106546.8	NR4A2	Nuclear receptor	ENSG00000153234.9	0.00792991	protein_coding	3.08795	132.95	51.2972	protein_coding	9.41274	93.4629	53.6691
AHR	ENSG00000106546.8	IRF1	IRF	ENSG00000125347.9	0.010483	protein_coding	20.5275	150.134	102.101	protein_coding	9.41274	93.4629	53.6691
AHR	ENSG00000106546.8	STAT5A	STAT	ENSG00000126561.12	0.00744343	protein_coding	36.4983	316.372	118.146	protein_coding	9.41274	93.4629	53.6691
AHR	ENSG00000106546.8	FOXJ2	Forkhead	ENSG00000065970.4	0.0100446	protein_coding	22.3937	14.2572	23.246	protein_coding	9.41274	93.4629	53.6691
AHR	ENSG00000106546.8	FOXK1	Forkhead	ENSG00000164916.9	0.012368	protein_coding	29.2615	39.2605	34.7856	protein_coding	9.41274	93.4629	53.6691
AHR	ENSG00000106546.8	FOXP1	Forkhead	ENSG00000114861.14	0.00804074	protein_coding	81.9274	148.688	90.0929	protein_coding	9.41274	93.4629	53.6691
AHR	ENSG00000106546.8	HIC2	C2H2 ZF	ENSG00000169635.5	0.0091567	protein_coding	6.41821	10.2589	5.99889	protein_coding	9.41274	93.4629	53.6691
AHR	ENSG00000106546.8	NFAT5	Rel	ENSG00000102908.16	0.00871164	protein_coding	13.1549	54.2287	31.9488	protein_coding	9.41274	93.4629	53.6691
AHR	ENSG00000106546.8	RFX1	RFX	ENSG00000132005.4	0.00734118	protein_coding	12.2825	7.71665	10.0227	protein_coding	9.41274	93.4629	53.6691
AHR	ENSG00000106546.8	LEF1	Sox	ENSG00000138795.5	0.00773358	protein_coding	364.591	202.089	280.925	protein_coding	9.41274	93.4629	53.6691
AHR	ENSG00000106546.8	NR4A1	Nuclear receptor	ENSG00000123358.15	0.0102827	protein_coding	1.8162	137.343	53.2826	protein_coding	9.41274	93.4629	53.6691
AHR	ENSG00000106546.8	FOSB	bZIP	ENSG00000125740.9	0.00709569	protein_coding	1.38153	14.6115	1.57442	protein_coding	9.41274	93.4629	53.6691
AHR	ENSG00000106546.8	EGR2	C2H2 ZF	ENSG00000122877.9	0.0120287	protein_coding	2.12493	158.341	31.8664	protein_coding	9.41274	93.4629	53.6691
AHR	ENSG00000106546.8	EGR3	C2H2 ZF	ENSG00000179388.8	0.0106321	protein_coding	1.35095	132.127	45.4685	protein_coding	9.41274	93.4629	53.6691
AHR	ENSG00000106546.8	IRF3	IRF	ENSG00000126456.11	0.0103669	protein_coding	26.1248	12.3178	23.4694	protein_coding	9.41274	93.4629	53.6691
AHR	ENSG00000106546.8	MAFG	bZIP	ENSG00000197063.6	0.0115136	protein_coding	5.59852	24.4516	19.1702	protein_coding	9.41274	93.4629	53.6691
AHR	ENSG00000106546.8	BACH2	bZIP	ENSG00000112182.10	0.00818172	protein_coding	49.8115	217.835	76.7515	protein_coding	9.41274	93.4629	53.6691
AHR	ENSG00000106546.8	RELB	Rel	ENSG00000104856.9	0.0111547	protein_coding	8.90223	122.195	61.4806	protein_coding	9.41274	93.4629	53.6691
AHR	ENSG00000106546.8	NFKB1	Rel	ENSG00000109320.7	0.00966956	protein_coding	29.1567	506.789	296.345	protein_coding	9.41274	93.4629	53.6691
SP4	ENSG00000105866.9	FOXK2	Forkhead	ENSG00000141568.15	0.0104834	protein_coding	14.4827	45.2678	41.1481	protein_coding	25.1884	15.9254	18.3065
SP4	ENSG00000105866.9	NFAT5	Rel	ENSG00000102908.16	0.00863471	protein_coding	13.1549	54.2287	31.9488	protein_coding	25.1884	15.9254	18.3065
SP4	ENSG00000105866.9	HMBOX1	Homeodomain	ENSG00000147421.13	0.00720437	protein_coding	23.4512	16.7878	14.3124	protein_coding	25.1884	15.9254	18.3065
SP4	ENSG00000105866.9	IRF8	IRF	ENSG00000140968.6	0.00960394	protein_coding	2.7126	143.835	108.547	protein_coding	25.1884	15.9254	18.3065
SP4	ENSG00000105866.9	ZNF75D	C2H2 ZF	ENSG00000186376.10	0.00851298	protein_coding	8.38859	2.948	2.23164	protein_coding	25.1884	15.9254	18.3065
SP4	ENSG00000105866.9	MEF2D	MADS box	ENSG00000116604.13	0.00801253	protein_coding	36.798	25.1847	25.5343	protein_coding	25.1884	15.9254	18.3065
SP4	ENSG00000105866.9	HSF2	HSF	ENSG00000025156.8	0.00907881	protein_coding	20.2022	22.7886	23.1956	protein_coding	25.1884	15.9254	18.3065
SP4	ENSG00000105866.9	CREM	bZIP	ENSG00000095794.15	0.011544	protein_coding	4.18751	35.9715	27.9649	protein_coding	25.1884	15.9254	18.3065
IKZF1	ENSG00000185811.12	ETS1	Ets	ENSG00000134954.10	0.0162789	protein_coding	452.612	162.87	218.837	protein_coding	140.55	182.375	130.244
IKZF1	ENSG00000185811.12	FLI1	Ets	ENSG00000151702.12	0.00961689	protein_coding	25.0796	8.22835	13.354	protein_coding	140.55	182.375	130.244
IKZF1	ENSG00000185811.12	GABPA	Ets	ENSG00000154727.6	0.00718181	protein_coding	10.4451	16.6224	11.9009	protein_coding	140.55	182.375	130.244
IKZF1	ENSG00000185811.12	ELF2	Ets	ENSG00000109381.15	0.00783556	protein_coding	15.8982	8.39304	7.75401	protein_coding	140.55	182.375	130.244
IKZF1	ENSG00000185811.12	ELF4	Ets	ENSG00000102034.12	0.0113427	protein_coding	26.4618	20.1657	33.0515	protein_coding	140.55	182.375	130.244
IKZF1	ENSG00000185811.12	ETV3	Ets	ENSG00000117036.7	0.00968788	protein_coding	12.9579	18.6252	12.707	protein_coding	140.55	182.375	130.244
IKZF1	ENSG00000185811.12	TCF12	bHLH	ENSG00000140262.13	0.0129835	protein_coding	17.2377	15.075	18.308	protein_coding	140.55	182.375	130.244
IKZF1	ENSG00000185811.12	SP2	C2H2 ZF	ENSG00000167182.11	0.00748828	protein_coding	34.5701	58.9216	43.343	protein_coding	140.55	182.375	130.244
IKZF1	ENSG00000185811.12	USF2	bHLH	ENSG00000105698.11	0.00892153	protein_coding	40.5727	17.8351	31.9485	protein_coding	140.55	182.375	130.244
IKZF1	ENSG00000185811.12	TCFL5	bHLH	ENSG00000101190.8	0.00884437	protein_coding	7.68045	6.17238	7.05429	protein_coding	140.55	182.375	130.244
IKZF1	ENSG00000185811.12	ZBTB6	C2H2 ZF	ENSG00000186130.4	0.00712017	protein_coding	14.1741	21.0704	12.5025	protein_coding	140.55	182.375	130.244
IKZF1	ENSG00000185811.12	FOXP1	Forkhead	ENSG00000114861.14	0.0073711	protein_coding	81.9274	148.688	90.0929	protein_coding	140.55	182.375	130.244
IKZF1	ENSG00000185811.12	FOXN3	Forkhead	ENSG00000053254.11	0.0105431	protein_coding	27.663	22.1201	34.2645	protein_coding	140.55	182.375	130.244
IKZF1	ENSG00000185811.12	FOXJ2	Forkhead	ENSG00000065970.4	0.00866894	protein_coding	22.3937	14.2572	23.246	protein_coding	140.55	182.375	130.244
IKZF1	ENSG00000185811.12	IRF2	IRF	ENSG00000168310.6	0.0108933	protein_coding	38.8138	22.4929	43.0542	protein_coding	140.55	182.375	130.244
IKZF1	ENSG00000185811.12	ZNF24	C2H2 ZF	ENSG00000172466.11	0.0105385	protein_coding	24.04	36.803	22.5491	protein_coding	140.55	182.375	130.244
IKZF1	ENSG00000185811.12	SMAD2	NA	ENSG00000175387.11	0.010975	protein_coding	21.3528	16.7268	18.7465	protein_coding	140.55	182.375	130.244
IKZF1	ENSG00000185811.12	PPARA	Nuclear receptor	ENSG00000186951.12	0.0135772	protein_coding	5.8692	2.70244	4.58454	protein_coding	140.55	182.375	130.244
IKZF1	ENSG00000185811.12	RFX1	RFX	ENSG00000132005.4	0.00741651	protein_coding	12.2825	7.71665	10.0227	protein_coding	140.55	182.375	130.244
IKZF1	ENSG00000185811.12	PBX2	Homeodomain	ENSG00000204304.7	0.011724	protein_coding	31.7444	13.5005	19.866	protein_coding	140.55	182.375	130.244
IKZF1	ENSG00000185811.12	SP4	C2H2 ZF	ENSG00000105866.9	0.0150911	protein_coding	25.1884	15.9254	18.3065	protein_coding	140.55	182.375	130.244
IKZF1	ENSG00000185811.12	SP3	C2H2 ZF	ENSG00000172845.9	0.0102974	protein_coding	25.2192	19.597	24.3094	protein_coding	140.55	182.375	130.244
IKZF1	ENSG00000185811.12	ARNT	bHLH	ENSG00000143437.16	0.010861	protein_coding	23.8486	13.5725	25.4699	protein_coding	140.55	182.375	130.244
IKZF1	ENSG00000185811.12	LEF1	Sox	ENSG00000138795.5	0.00989942	protein_coding	364.591	202.089	280.925	protein_coding	140.55	182.375	130.244
IKZF1	ENSG00000185811.12	MSANTD3	MADF	ENSG00000066697.10	0.0087879	protein_coding	5.32575	3.26369	6.82814	protein_coding	140.55	182.375	130.244
IKZF1	ENSG00000185811.12	NR2C2	Nuclear receptor	ENSG00000177463.11	0.00825391	protein_coding	25.6732	14.2385	18.4864	protein_coding	140.55	182.375	130.244
IKZF1	ENSG00000185811.12	FOSL2	bZIP	ENSG00000075426.7	0.00813777	protein_coding	2.97949	68.8857	12.7455	protein_coding	140.55	182.375	130.244
IKZF1	ENSG00000185811.12	MAFK	bZIP	ENSG00000198517.5	0.00795744	protein_coding	7.86877	20.1437	11.0981	protein_coding	140.55	182.375	130.244
IKZF1	ENSG00000185811.12	KLF13	C2H2 ZF	ENSG00000169926.5	0.0075635	protein_coding	74.148	22.3999	42.3073	protein_coding	140.55	182.375	130.244
IKZF1	ENSG00000185811.12	PBX3	Homeodomain	ENSG00000167081.12	0.00803173	protein_coding	9.21206	5.42354	5.54844	protein_coding	140.55	182.375	130.244
IKZF1	ENSG00000185811.12	RARG	Nuclear receptor	ENSG00000172819.12	0.0119278	protein_coding	16.4433	7.00141	13.5178	protein_coding	140.55	182.375	130.244
IKZF1	ENSG00000185811.12	LIN54	TCR/CxC	ENSG00000189308.6	0.0153357	protein_coding	8.21127	3.97463	10.4772	protein_coding	140.55	182.375	130.244
IKZF1	ENSG00000185811.12	XBP1	bZIP	ENSG00000100219.12	0.00752701	protein_coding	53.3347	169.494	64.6697	protein_coding	140.55	182.375	130.244
IKZF1	ENSG00000185811.12	CREB3	bZIP	ENSG00000107175.6	0.00891828	protein_coding	9.17368	6.9742	14.5769	protein_coding	140.55	182.375	130.244
IKZF1	ENSG00000185811.12	NR2C1	Nuclear receptor	ENSG00000120798.12	0.012248	protein_coding	11.3642	5.96711	5.43842	protein_coding	140.55	182.375	130.244
IKZF1	ENSG00000185811.12	ZBTB14	C2H2 ZF	ENSG00000198081.6	0.0091432	protein_coding	22.0902	8.83913	14.8651	protein_coding	140.55	182.375	130.244
IKZF1	ENSG00000185811.12	HLTF	NA	ENSG00000071794.11	0.0145877	protein_coding	10.3092	5.83055	9.54802	protein_coding	140.55	182.375	130.244
ZKSCAN5	ENSG00000196652.7	SP4	C2H2 ZF	ENSG00000105866.9	0.00760825	protein_coding	25.1884	15.9254	18.3065	protein_coding	6.20244	5.97498	5.92535
ZKSCAN5	ENSG00000196652.7	KLF6	C2H2 ZF	ENSG00000067082.10	0.00712492	protein_coding	20.002	29.0863	17.9519	protein_coding	6.20244	5.97498	5.92535
ZKSCAN5	ENSG00000196652.7	ARNT	bHLH	ENSG00000143437.16	0.00949854	protein_coding	23.8486	13.5725	25.4699	protein_coding	6.20244	5.97498	5.92535
ZKSCAN5	ENSG00000196652.7	NFYB	Unknown	ENSG00000120837.3	0.0160707	protein_coding	4.8532	5.77657	5.59654	protein_coding	6.20244	5.97498	5.92535
ZKSCAN5	ENSG00000196652.7	MSANTD3	MADF	ENSG00000066697.10	0.00858613	protein_coding	5.32575	3.26369	6.82814	protein_coding	6.20244	5.97498	5.92535
ZKSCAN5	ENSG00000196652.7	NFATC2	Rel	ENSG00000101096.15	0.0109792	protein_coding	33.903	24.7075	33.2928	protein_coding	6.20244	5.97498	5.92535
ZKSCAN1	ENSG00000106261.12	ELF4	Ets	ENSG00000102034.12	0.00706789	protein_coding	26.4618	20.1657	33.0515	protein_coding	29.63	31.1672	19.9696
ZKSCAN1	ENSG00000106261.12	ZNF341	C2H2 ZF	ENSG00000131061.9	0.00848739	protein_coding	4.7502	6.20738	8.51451	protein_coding	29.63	31.1672	19.9696
ZKSCAN1	ENSG00000106261.12	ZNF263	C2H2 ZF	ENSG00000006194.6	0.00823583	protein_coding	13.8496	19.5448	8.63775	protein_coding	29.63	31.1672	19.9696
ZKSCAN1	ENSG00000106261.12	ELF1	Ets	ENSG00000120690.9	0.00942803	protein_coding	72.2458	77.2599	48.5997	protein_coding	29.63	31.1672	19.9696
ZKSCAN1	ENSG00000106261.12	RUNX1	Runt	ENSG00000159216.14	0.0109813	protein_coding	21.5738	25.8568	16.771	protein_coding	29.63	31.1672	19.9696
ZKSCAN1	ENSG00000106261.12	MZF1	C2H2 ZF	ENSG00000099326.4	0.0100835	protein_coding	11.9589	11.2526	7.29446	protein_coding	29.63	31.1672	19.9696
ZKSCAN1	ENSG00000106261.12	KLF11	C2H2 ZF	ENSG00000172059.6	0.00874129	protein_coding	3.5389	6.49125	9.48579	protein_coding	29.63	31.1672	19.9696
ZKSCAN1	ENSG00000106261.12	RUNX3	Runt	ENSG00000020633.14	0.00787179	protein_coding	47.4684	73.1236	109.548	protein_coding	29.63	31.1672	19.9696
ZKSCAN1	ENSG00000106261.12	NFIC	SMAD	ENSG00000141905.13	0.0091842	protein_coding	14.4289	14.8113	25.0569	protein_coding	29.63	31.1672	19.9696
ZKSCAN1	ENSG00000106261.12	ZBTB32	C2H2 ZF	ENSG00000011590.9	0.00920868	protein_coding	1.62528	8.92416	31.9888	protein_coding	29.63	31.1672	19.9696
ZKSCAN1	ENSG00000106261.12	MAZ	C2H2 ZF	ENSG00000103495.9	0.00795929	protein_coding	71.6034	91.0371	189.127	protein_coding	29.63	31.1672	19.9696
ZKSCAN1	ENSG00000106261.12	THAP1	THAP finger	ENSG00000131931.4	0.00760277	protein_coding	10.3161	13.9612	18.6273	protein_coding	29.63	31.1672	19.9696
CUX1	ENSG00000257923.5	TCF3	bHLH	ENSG00000071564.10	0.00799263	protein_coding	18.7774	32.7741	47.0143	protein_coding	11.876	9.90491	6.20826
CUX1	ENSG00000257923.5	GATA3	GATA	ENSG00000107485.11	0.00920409	protein_coding	27.0461	22.0926	11.966	protein_coding	11.876	9.90491	6.20826
CUX1	ENSG00000257923.5	FOXO1	Forkhead	ENSG00000150907.6	0.0083953	protein_coding	94.0816	55.3038	49.5386	protein_coding	11.876	9.90491	6.20826
CUX1	ENSG00000257923.5	ZEB1	C2H2 ZF,Homeodomain	ENSG00000148516.17	0.00916139	protein_coding	30.5601	27.0703	15.1315	protein_coding	11.876	9.90491	6.20826
CUX1	ENSG00000257923.5	TFDP1	E2F	ENSG00000198176.8	0.0133505	protein_coding	10.5546	23.5774	99.2647	protein_coding	11.876	9.90491	6.20826
CUX1	ENSG00000257923.5	KLF11	C2H2 ZF	ENSG00000172059.6	0.00951936	protein_coding	3.5389	6.49125	9.48579	protein_coding	11.876	9.90491	6.20826
CUX1	ENSG00000257923.5	MAZ	C2H2 ZF	ENSG00000103495.9	0.00710758	protein_coding	71.6034	91.0371	189.127	protein_coding	11.876	9.90491	6.20826
CUX1	ENSG00000257923.5	MLXIP	bHLH	ENSG00000175727.9	0.00820267	protein_coding	38.3803	32.1952	21.9588	protein_coding	11.876	9.90491	6.20826
CUX1	ENSG00000257923.5	MEF2A	MADS box	ENSG00000068305.13	0.0127057	protein_coding	17.5747	16.3968	11.6467	protein_coding	11.876	9.90491	6.20826
CUX1	ENSG00000257923.5	JUND	bZIP	ENSG00000130522.4	0.00727091	protein_coding	74.3572	109.809	180.846	protein_coding	11.876	9.90491	6.20826
CUX1	ENSG00000257923.5	THAP1	THAP finger	ENSG00000131931.4	0.00863052	protein_coding	10.3161	13.9612	18.6273	protein_coding	11.876	9.90491	6.20826
CUX1	ENSG00000257923.5	VDR	Nuclear receptor	ENSG00000111424.6	0.00837712	protein_coding	3.51623	9.31279	32.3455	protein_coding	11.876	9.90491	6.20826
NRF1	ENSG00000106459.10	ZNF263	C2H2 ZF	ENSG00000006194.6	0.00851549	protein_coding	13.8496	19.5448	8.63775	protein_coding	12.1101	19.1807	7.90798
NRF1	ENSG00000106459.10	CTCF	C2H2 ZF	ENSG00000102974.10	0.00720487	protein_coding	50.6801	45.7903	69.2994	protein_coding	12.1101	19.1807	7.90798
NRF1	ENSG00000106459.10	LIN54	TCR/CxC	ENSG00000189308.6	0.012146	protein_coding	8.21127	3.97463	10.4772	protein_coding	12.1101	19.1807	7.90798
NRF1	ENSG00000106459.10	FOS	bZIP	ENSG00000170345.5	0.00929643	protein_coding	2.22869	22.6799	3.04045	protein_coding	12.1101	19.1807	7.90798
NRF1	ENSG00000106459.10	GABPA	Ets	ENSG00000154727.6	0.00867533	protein_coding	10.4451	16.6224	11.9009	protein_coding	12.1101	19.1807	7.90798
NRF1	ENSG00000106459.10	ELK4	Ets	ENSG00000158711.9	0.0101011	protein_coding	67.4856	107.039	70.1592	protein_coding	12.1101	19.1807	7.90798
NRF1	ENSG00000106459.10	IKZF1	C2H2 ZF	ENSG00000185811.12	0.0104797	protein_coding	140.55	182.375	130.244	protein_coding	12.1101	19.1807	7.90798
NRF1	ENSG00000106459.10	BACH1	bZIP	ENSG00000156273.11	0.0114355	protein_coding	15.2362	29.6887	9.70708	protein_coding	12.1101	19.1807	7.90798
NRF1	ENSG00000106459.10	SMAD2	NA	ENSG00000175387.11	0.00940601	protein_coding	21.3528	16.7268	18.7465	protein_coding	12.1101	19.1807	7.90798
NRF1	ENSG00000106459.10	ZNF460	C2H2 ZF	ENSG00000197714.4	0.00716278	protein_coding	31.8465	67.1283	30.8887	protein_coding	12.1101	19.1807	7.90798
NRF1	ENSG00000106459.10	SNAI1	C2H2 ZF	ENSG00000124216.3	0.00858663	protein_coding	1.30754	8.60721	3.42322	protein_coding	12.1101	19.1807	7.90798
NRF1	ENSG00000106459.10	RFX1	RFX	ENSG00000132005.4	0.00860473	protein_coding	12.2825	7.71665	10.0227	protein_coding	12.1101	19.1807	7.90798
NRF1	ENSG00000106459.10	KLF9	C2H2 ZF	ENSG00000119138.3	0.0090941	protein_coding	14.7466	42.3805	19.3454	protein_coding	12.1101	19.1807	7.90798
NRF1	ENSG00000106459.10	KLF6	C2H2 ZF	ENSG00000067082.10	0.00880081	protein_coding	20.002	29.0863	17.9519	protein_coding	12.1101	19.1807	7.90798
NRF1	ENSG00000106459.10	KLF10	C2H2 ZF	ENSG00000155090.10	0.00700042	protein_coding	2.98347	101.32	25.2161	protein_coding	12.1101	19.1807	7.90798
NRF1	ENSG00000106459.10	ZBTB14	C2H2 ZF	ENSG00000198081.6	0.00865662	protein_coding	22.0902	8.83913	14.8651	protein_coding	12.1101	19.1807	7.90798
NRF1	ENSG00000106459.10	RREB1	C2H2 ZF	ENSG00000124782.15	0.00842174	protein_coding	16.4582	21.8455	9.185	protein_coding	12.1101	19.1807	7.90798
NRF1	ENSG00000106459.10	PRDM1	C2H2 ZF	ENSG00000057657.10	0.00834831	protein_coding	1.80343	5.61797	1.2626	protein_coding	12.1101	19.1807	7.90798
NRF1	ENSG00000106459.10	NFATC2	Rel	ENSG00000101096.15	0.0122692	protein_coding	33.903	24.7075	33.2928	protein_coding	12.1101	19.1807	7.90798
NRF1	ENSG00000106459.10	NR4A2	Nuclear receptor	ENSG00000153234.9	0.0123096	protein_coding	3.08795	132.95	51.2972	protein_coding	12.1101	19.1807	7.90798
ZNF282	ENSG00000170265.7	NFIC	SMAD	ENSG00000141905.13	0.00921955	protein_coding	14.4289	14.8113	25.0569	protein_coding	10.0338	13.1235	24.7383
ZNF282	ENSG00000170265.7	ZNF263	C2H2 ZF	ENSG00000006194.6	0.00744076	protein_coding	13.8496	19.5448	8.63775	protein_coding	10.0338	13.1235	24.7383
ZNF282	ENSG00000170265.7	MAZ	C2H2 ZF	ENSG00000103495.9	0.00984625	protein_coding	71.6034	91.0371	189.127	protein_coding	10.0338	13.1235	24.7383
ZNF282	ENSG00000170265.7	SP1	C2H2 ZF	ENSG00000185591.5	0.00881755	protein_coding	62.5147	64.2127	75.0785	protein_coding	10.0338	13.1235	24.7383
ZNF282	ENSG00000170265.7	KLF2	C2H2 ZF	ENSG00000127528.5	0.00713506	protein_coding	643.228	77.5309	3.57086	protein_coding	10.0338	13.1235	24.7383
ZNF282	ENSG00000170265.7	JUND	bZIP	ENSG00000130522.4	0.00741813	protein_coding	74.3572	109.809	180.846	protein_coding	10.0338	13.1235	24.7383
ZNF282	ENSG00000170265.7	ZNF354C	C2H2 ZF	ENSG00000177932.6	0.0111412	protein_coding	8.44028	6.87653	5.68326	protein_coding	10.0338	13.1235	24.7383
ZNF282	ENSG00000170265.7	CTCF	C2H2 ZF	ENSG00000102974.10	0.00886184	protein_coding	50.6801	45.7903	69.2994	protein_coding	10.0338	13.1235	24.7383
ZNF282	ENSG00000170265.7	NRF1	Unknown	ENSG00000106459.10	0.0090932	protein_coding	12.1101	19.1807	7.90798	protein_coding	10.0338	13.1235	24.7383
EGR3	ENSG00000179388.8	CTCF	C2H2 ZF	ENSG00000102974.10	0.0079119	protein_coding	50.6801	45.7903	69.2994	protein_coding	1.35095	132.127	45.4685
EGR3	ENSG00000179388.8	RUNX1	Runt	ENSG00000159216.14	0.00726736	protein_coding	21.5738	25.8568	16.771	protein_coding	1.35095	132.127	45.4685
EGR3	ENSG00000179388.8	E2F6	E2F	ENSG00000169016.12	0.00786674	protein_coding	2.84755	10.2704	6.21233	protein_coding	1.35095	132.127	45.4685
EGR3	ENSG00000179388.8	EGR2	C2H2 ZF	ENSG00000122877.9	0.0114807	protein_coding	2.12493	158.341	31.8664	protein_coding	1.35095	132.127	45.4685
EGR3	ENSG00000179388.8	HIF1A	bHLH	ENSG00000100644.12	0.0105352	protein_coding	37.8509	193.534	125.593	protein_coding	1.35095	132.127	45.4685
EGR3	ENSG00000179388.8	STAT5A	STAT	ENSG00000126561.12	0.00813422	protein_coding	36.4983	316.372	118.146	protein_coding	1.35095	132.127	45.4685
EGR3	ENSG00000179388.8	ELF4	Ets	ENSG00000102034.12	0.0111748	protein_coding	26.4618	20.1657	33.0515	protein_coding	1.35095	132.127	45.4685
EGR3	ENSG00000179388.8	KLF9	C2H2 ZF	ENSG00000119138.3	0.00837632	protein_coding	14.7466	42.3805	19.3454	protein_coding	1.35095	132.127	45.4685
EGR3	ENSG00000179388.8	FOSL2	bZIP	ENSG00000075426.7	0.0114377	protein_coding	2.97949	68.8857	12.7455	protein_coding	1.35095	132.127	45.4685
EGR3	ENSG00000179388.8	FOS	bZIP	ENSG00000170345.5	0.00782049	protein_coding	2.22869	22.6799	3.04045	protein_coding	1.35095	132.127	45.4685
EGR3	ENSG00000179388.8	FOSL1	bZIP	ENSG00000175592.4	0.00775609	protein_coding	1.60479	151.689	60.6658	protein_coding	1.35095	132.127	45.4685
EGR3	ENSG00000179388.8	FOSB	bZIP	ENSG00000125740.9	0.0108896	protein_coding	1.38153	14.6115	1.57442	protein_coding	1.35095	132.127	45.4685
EGR3	ENSG00000179388.8	SMAD2	NA	ENSG00000175387.11	0.00998794	protein_coding	21.3528	16.7268	18.7465	protein_coding	1.35095	132.127	45.4685
EGR3	ENSG00000179388.8	HIC2	C2H2 ZF	ENSG00000169635.5	0.00787086	protein_coding	6.41821	10.2589	5.99889	protein_coding	1.35095	132.127	45.4685
EGR3	ENSG00000179388.8	IKZF1	C2H2 ZF	ENSG00000185811.12	0.0113063	protein_coding	140.55	182.375	130.244	protein_coding	1.35095	132.127	45.4685
EGR3	ENSG00000179388.8	USF2	bHLH	ENSG00000105698.11	0.00835427	protein_coding	40.5727	17.8351	31.9485	protein_coding	1.35095	132.127	45.4685
EGR3	ENSG00000179388.8	RREB1	C2H2 ZF	ENSG00000124782.15	0.00760272	protein_coding	16.4582	21.8455	9.185	protein_coding	1.35095	132.127	45.4685
EGR3	ENSG00000179388.8	NR4A2	Nuclear receptor	ENSG00000153234.9	0.00898394	protein_coding	3.08795	132.95	51.2972	protein_coding	1.35095	132.127	45.4685
EGR3	ENSG00000179388.8	ETV3	Ets	ENSG00000117036.7	0.00772575	protein_coding	12.9579	18.6252	12.707	protein_coding	1.35095	132.127	45.4685
EGR3	ENSG00000179388.8	KLF13	C2H2 ZF	ENSG00000169926.5	0.00956981	protein_coding	74.148	22.3999	42.3073	protein_coding	1.35095	132.127	45.4685
EGR3	ENSG00000179388.8	REL	Rel	ENSG00000162924.9	0.00792163	protein_coding	8.38764	216.888	56.7033	protein_coding	1.35095	132.127	45.4685
EGR3	ENSG00000179388.8	MAFG	bZIP	ENSG00000197063.6	0.00836509	protein_coding	5.59852	24.4516	19.1702	protein_coding	1.35095	132.127	45.4685
EGR3	ENSG00000179388.8	MAFF	bZIP	ENSG00000185022.7	0.0073031	protein_coding	4.04945	8.48979	4.91597	protein_coding	1.35095	132.127	45.4685
EGR3	ENSG00000179388.8	BACH1	bZIP	ENSG00000156273.11	0.00802931	protein_coding	15.2362	29.6887	9.70708	protein_coding	1.35095	132.127	45.4685
EGR3	ENSG00000179388.8	ZNF281	C2H2 ZF	ENSG00000162702.7	0.00768387	protein_coding	19.3751	26.911	17.9295	protein_coding	1.35095	132.127	45.4685
EGR3	ENSG00000179388.8	FOXK1	Forkhead	ENSG00000164916.9	0.0103367	protein_coding	29.2615	39.2605	34.7856	protein_coding	1.35095	132.127	45.4685
EGR3	ENSG00000179388.8	ZNF140	C2H2 ZF	ENSG00000196387.5	0.00879261	protein_coding	7.55863	11.9829	6.05519	protein_coding	1.35095	132.127	45.4685
EGR3	ENSG00000179388.8	ZBTB14	C2H2 ZF	ENSG00000198081.6	0.00955971	protein_coding	22.0902	8.83913	14.8651	protein_coding	1.35095	132.127	45.4685
EGR3	ENSG00000179388.8	RELB	Rel	ENSG00000104856.9	0.0112748	protein_coding	8.90223	122.195	61.4806	protein_coding	1.35095	132.127	45.4685
HMBOX1	ENSG00000147421.13	ZBTB32	C2H2 ZF	ENSG00000011590.9	0.00859308	protein_coding	1.62528	8.92416	31.9888	protein_coding	23.4512	16.7878	14.3124
HMBOX1	ENSG00000147421.13	ZNF740	C2H2 ZF	ENSG00000139651.9	0.00854417	protein_coding	30.1018	20.8814	16.9006	protein_coding	23.4512	16.7878	14.3124
HMBOX1	ENSG00000147421.13	ZNF354C	C2H2 ZF	ENSG00000177932.6	0.00709794	protein_coding	8.44028	6.87653	5.68326	protein_coding	23.4512	16.7878	14.3124
HMBOX1	ENSG00000147421.13	TCF3	bHLH	ENSG00000071564.10	0.00842908	protein_coding	18.7774	32.7741	47.0143	protein_coding	23.4512	16.7878	14.3124
HMBOX1	ENSG00000147421.13	ELF2	Ets	ENSG00000109381.15	0.00737462	protein_coding	15.8982	8.39304	7.75401	protein_coding	23.4512	16.7878	14.3124
HMBOX1	ENSG00000147421.13	ZEB1	C2H2 ZF,Homeodomain	ENSG00000148516.17	0.00873089	protein_coding	30.5601	27.0703	15.1315	protein_coding	23.4512	16.7878	14.3124
ZBTB18	ENSG00000179456.9	KLF16	C2H2 ZF	ENSG00000129911.4	0.0077538	protein_coding	11.7561	43.2471	45.3241	protein_coding	104.724	28.3132	11.2869
PLAG1	ENSG00000181690.3	KLF16	C2H2 ZF	ENSG00000129911.4	0.0100928	protein_coding	11.7561	43.2471	45.3241	protein_coding	8.37695	2.21704	1.83645
PLAG1	ENSG00000181690.3	KLF11	C2H2 ZF	ENSG00000172059.6	0.00711476	protein_coding	3.5389	6.49125	9.48579	protein_coding	8.37695	2.21704	1.83645
PLAG1	ENSG00000181690.3	TFDP1	E2F	ENSG00000198176.8	0.00834459	protein_coding	10.5546	23.5774	99.2647	protein_coding	8.37695	2.21704	1.83645
PLAG1	ENSG00000181690.3	SP2	C2H2 ZF	ENSG00000167182.11	0.00716531	protein_coding	34.5701	58.9216	43.343	protein_coding	8.37695	2.21704	1.83645
PLAG1	ENSG00000181690.3	USF2	bHLH	ENSG00000105698.11	0.00748945	protein_coding	40.5727	17.8351	31.9485	protein_coding	8.37695	2.21704	1.83645
PLAG1	ENSG00000181690.3	RFX1	RFX	ENSG00000132005.4	0.00788345	protein_coding	12.2825	7.71665	10.0227	protein_coding	8.37695	2.21704	1.83645
PLAG1	ENSG00000181690.3	ZNF354C	C2H2 ZF	ENSG00000177932.6	0.00874693	protein_coding	8.44028	6.87653	5.68326	protein_coding	8.37695	2.21704	1.83645
PLAG1	ENSG00000181690.3	MAFG	bZIP	ENSG00000197063.6	0.00995957	protein_coding	5.59852	24.4516	19.1702	protein_coding	8.37695	2.21704	1.83645
PLAG1	ENSG00000181690.3	THAP1	THAP finger	ENSG00000131931.4	0.00726223	protein_coding	10.3161	13.9612	18.6273	protein_coding	8.37695	2.21704	1.83645
ZBTB18	ENSG00000179456.9	TFDP1	E2F	ENSG00000198176.8	0.0088414	protein_coding	10.5546	23.5774	99.2647	protein_coding	104.724	28.3132	11.2869
ZBTB18	ENSG00000179456.9	KLF2	C2H2 ZF	ENSG00000127528.5	0.00717251	protein_coding	643.228	77.5309	3.57086	protein_coding	104.724	28.3132	11.2869
ZBTB18	ENSG00000179456.9	ZNF75D	C2H2 ZF	ENSG00000186376.10	0.00783244	protein_coding	8.38859	2.948	2.23164	protein_coding	104.724	28.3132	11.2869
ZBTB18	ENSG00000179456.9	RELA	Rel	ENSG00000173039.14	0.00768495	protein_coding	47.6368	71.7005	69.9761	protein_coding	104.724	28.3132	11.2869
ZBTB18	ENSG00000179456.9	NFIX	SMAD	ENSG00000008441.12	0.00856928	protein_coding	4.02934	24.3211	14.9281	protein_coding	104.724	28.3132	11.2869
ZBTB18	ENSG00000179456.9	STAT1	STAT	ENSG00000115415.14	0.0087271	protein_coding	35.0834	445.774	430.889	protein_coding	104.724	28.3132	11.2869
ZBTB18	ENSG00000179456.9	IRF1	IRF	ENSG00000125347.9	0.0086391	protein_coding	20.5275	150.134	102.101	protein_coding	104.724	28.3132	11.2869
ZBTB18	ENSG00000179456.9	ZNF341	C2H2 ZF	ENSG00000131061.9	0.0116784	protein_coding	4.7502	6.20738	8.51451	protein_coding	104.724	28.3132	11.2869
KLF10	ENSG00000155090.10	ARNT	bHLH	ENSG00000143437.16	0.00963178	protein_coding	23.8486	13.5725	25.4699	protein_coding	2.98347	101.32	25.2161
KLF10	ENSG00000155090.10	BCL6	C2H2 ZF	ENSG00000113916.13	0.00766873	protein_coding	4.17339	18.1066	5.56979	protein_coding	2.98347	101.32	25.2161
KLF10	ENSG00000155090.10	NR1D1	Nuclear receptor	ENSG00000126368.5	0.00716488	protein_coding	19.4206	54.1854	31.3215	protein_coding	2.98347	101.32	25.2161
KLF10	ENSG00000155090.10	NR4A2	Nuclear receptor	ENSG00000153234.9	0.0114945	protein_coding	3.08795	132.95	51.2972	protein_coding	2.98347	101.32	25.2161
KLF10	ENSG00000155090.10	NFYA	CBF/NF-Y	ENSG00000001167.10	0.00991744	protein_coding	22.9157	43.4457	28.5316	protein_coding	2.98347	101.32	25.2161
KLF10	ENSG00000155090.10	FOXN3	Forkhead	ENSG00000053254.11	0.0107947	protein_coding	27.663	22.1201	34.2645	protein_coding	2.98347	101.32	25.2161
KLF10	ENSG00000155090.10	EGR2	C2H2 ZF	ENSG00000122877.9	0.00885052	protein_coding	2.12493	158.341	31.8664	protein_coding	2.98347	101.32	25.2161
KLF10	ENSG00000155090.10	EGR3	C2H2 ZF	ENSG00000179388.8	0.00939139	protein_coding	1.35095	132.127	45.4685	protein_coding	2.98347	101.32	25.2161
KLF10	ENSG00000155090.10	RREB1	C2H2 ZF	ENSG00000124782.15	0.00936274	protein_coding	16.4582	21.8455	9.185	protein_coding	2.98347	101.32	25.2161
KLF10	ENSG00000155090.10	ZNF460	C2H2 ZF	ENSG00000197714.4	0.00883833	protein_coding	31.8465	67.1283	30.8887	protein_coding	2.98347	101.32	25.2161
KLF10	ENSG00000155090.10	AHR	bHLH	ENSG00000106546.8	0.00727586	protein_coding	9.41274	93.4629	53.6691	protein_coding	2.98347	101.32	25.2161
KLF10	ENSG00000155090.10	REL	Rel	ENSG00000162924.9	0.00871555	protein_coding	8.38764	216.888	56.7033	protein_coding	2.98347	101.32	25.2161
KLF10	ENSG00000155090.10	FOXP1	Forkhead	ENSG00000114861.14	0.00707919	protein_coding	81.9274	148.688	90.0929	protein_coding	2.98347	101.32	25.2161
KLF10	ENSG00000155090.10	FOXJ2	Forkhead	ENSG00000065970.4	0.00734207	protein_coding	22.3937	14.2572	23.246	protein_coding	2.98347	101.32	25.2161
KLF10	ENSG00000155090.10	RFX1	RFX	ENSG00000132005.4	0.00810677	protein_coding	12.2825	7.71665	10.0227	protein_coding	2.98347	101.32	25.2161
KLF10	ENSG00000155090.10	MYB	Myb/SANT	ENSG00000118513.14	0.00924353	protein_coding	8.9003	38.6206	20.9037	protein_coding	2.98347	101.32	25.2161
KLF10	ENSG00000155090.10	IRF3	IRF	ENSG00000126456.11	0.0134093	protein_coding	26.1248	12.3178	23.4694	protein_coding	2.98347	101.32	25.2161
KLF10	ENSG00000155090.10	IRF2	IRF	ENSG00000168310.6	0.00909324	protein_coding	38.8138	22.4929	43.0542	protein_coding	2.98347	101.32	25.2161
KLF10	ENSG00000155090.10	DDIT3	bZIP	ENSG00000175197.6	0.00901911	protein_coding	12.2974	35.3201	14.9946	protein_coding	2.98347	101.32	25.2161
KLF10	ENSG00000155090.10	SMAD2	NA	ENSG00000175387.11	0.0101151	protein_coding	21.3528	16.7268	18.7465	protein_coding	2.98347	101.32	25.2161
KLF10	ENSG00000155090.10	PPARA	Nuclear receptor	ENSG00000186951.12	0.00815241	protein_coding	5.8692	2.70244	4.58454	protein_coding	2.98347	101.32	25.2161
KLF10	ENSG00000155090.10	ZNF281	C2H2 ZF	ENSG00000162702.7	0.00830727	protein_coding	19.3751	26.911	17.9295	protein_coding	2.98347	101.32	25.2161
KLF10	ENSG00000155090.10	FOSL1	bZIP	ENSG00000175592.4	0.0097804	protein_coding	1.60479	151.689	60.6658	protein_coding	2.98347	101.32	25.2161
KLF10	ENSG00000155090.10	BACH1	bZIP	ENSG00000156273.11	0.0102604	protein_coding	15.2362	29.6887	9.70708	protein_coding	2.98347	101.32	25.2161
KLF10	ENSG00000155090.10	FOS	bZIP	ENSG00000170345.5	0.0107768	protein_coding	2.22869	22.6799	3.04045	protein_coding	2.98347	101.32	25.2161
KLF10	ENSG00000155090.10	ELK3	Ets	ENSG00000111145.3	0.0131781	protein_coding	28.9716	53.2809	27.9617	protein_coding	2.98347	101.32	25.2161
KLF10	ENSG00000155090.10	ETV3	Ets	ENSG00000117036.7	0.00951859	protein_coding	12.9579	18.6252	12.707	protein_coding	2.98347	101.32	25.2161
KLF10	ENSG00000155090.10	NR4A1	Nuclear receptor	ENSG00000123358.15	0.00761365	protein_coding	1.8162	137.343	53.2826	protein_coding	2.98347	101.32	25.2161
KLF10	ENSG00000155090.10	HIF1A	bHLH	ENSG00000100644.12	0.00897987	protein_coding	37.8509	193.534	125.593	protein_coding	2.98347	101.32	25.2161
KLF10	ENSG00000155090.10	PKNOX1	Homeodomain	ENSG00000160199.10	0.0118517	protein_coding	6.08803	12.0409	6.80785	protein_coding	2.98347	101.32	25.2161
KLF10	ENSG00000155090.10	LEF1	Sox	ENSG00000138795.5	0.00874264	protein_coding	364.591	202.089	280.925	protein_coding	2.98347	101.32	25.2161
KLF10	ENSG00000155090.10	ATF3	bZIP	ENSG00000162772.12	0.0124154	protein_coding	1.83901	12.5986	5.37156	protein_coding	2.98347	101.32	25.2161
KLF10	ENSG00000155090.10	GFI1	C2H2 ZF	ENSG00000162676.7	0.00743508	protein_coding	10.0452	202.356	83.9047	protein_coding	2.98347	101.32	25.2161
KLF10	ENSG00000155090.10	LIN54	TCR/CxC	ENSG00000189308.6	0.0079677	protein_coding	8.21127	3.97463	10.4772	protein_coding	2.98347	101.32	25.2161
KLF10	ENSG00000155090.10	NFKB1	Rel	ENSG00000109320.7	0.00737303	protein_coding	29.1567	506.789	296.345	protein_coding	2.98347	101.32	25.2161
KLF10	ENSG00000155090.10	ZNF136	C2H2 ZF	ENSG00000196646.7	0.00729187	protein_coding	7.35826	8.26587	5.50982	protein_coding	2.98347	101.32	25.2161
KLF6	ENSG00000067082.10	PRDM1	C2H2 ZF	ENSG00000057657.10	0.0167352	protein_coding	1.80343	5.61797	1.2626	protein_coding	20.002	29.0863	17.9519
KLF6	ENSG00000067082.10	ZNF460	C2H2 ZF	ENSG00000197714.4	0.0195733	protein_coding	31.8465	67.1283	30.8887	protein_coding	20.002	29.0863	17.9519
KLF6	ENSG00000067082.10	RREB1	C2H2 ZF	ENSG00000124782.15	0.00805195	protein_coding	16.4582	21.8455	9.185	protein_coding	20.002	29.0863	17.9519
KLF6	ENSG00000067082.10	KLF10	C2H2 ZF	ENSG00000155090.10	0.00809003	protein_coding	2.98347	101.32	25.2161	protein_coding	20.002	29.0863	17.9519
KLF6	ENSG00000067082.10	ZKSCAN5	C2H2 ZF	ENSG00000196652.7	0.0157172	protein_coding	6.20244	5.97498	5.92535	protein_coding	20.002	29.0863	17.9519
KLF6	ENSG00000067082.10	JUN	bZIP	ENSG00000177606.5	0.00881133	protein_coding	7.94923	14.3257	6.56083	protein_coding	20.002	29.0863	17.9519
MYC	ENSG00000136997.10	NFIX	SMAD	ENSG00000008441.12	0.00856562	protein_coding	4.02934	24.3211	14.9281	protein_coding	102.767	1095.75	648.817
MYC	ENSG00000136997.10	PRDM1	C2H2 ZF	ENSG00000057657.10	0.00839257	protein_coding	1.80343	5.61797	1.2626	protein_coding	102.767	1095.75	648.817
MYC	ENSG00000136997.10	FOSL1	bZIP	ENSG00000175592.4	0.00874036	protein_coding	1.60479	151.689	60.6658	protein_coding	102.767	1095.75	648.817
MYC	ENSG00000136997.10	FOSL2	bZIP	ENSG00000075426.7	0.00836474	protein_coding	2.97949	68.8857	12.7455	protein_coding	102.767	1095.75	648.817
MYC	ENSG00000136997.10	BATF	bZIP	ENSG00000156127.6	0.00907567	protein_coding	5.33826	97.4656	88.5682	protein_coding	102.767	1095.75	648.817
MYC	ENSG00000136997.10	NR2C1	Nuclear receptor	ENSG00000120798.12	0.0097657	protein_coding	11.3642	5.96711	5.43842	protein_coding	102.767	1095.75	648.817
MYC	ENSG00000136997.10	ETV3	Ets	ENSG00000117036.7	0.00711136	protein_coding	12.9579	18.6252	12.707	protein_coding	102.767	1095.75	648.817
MYC	ENSG00000136997.10	TBX21	T-box	ENSG00000073861.2	0.00935466	protein_coding	2.92139	115.541	116.88	protein_coding	102.767	1095.75	648.817
MYC	ENSG00000136997.10	PBX3	Homeodomain	ENSG00000167081.12	0.00763179	protein_coding	9.21206	5.42354	5.54844	protein_coding	102.767	1095.75	648.817
MYC	ENSG00000136997.10	IKZF1	C2H2 ZF	ENSG00000185811.12	0.00798728	protein_coding	140.55	182.375	130.244	protein_coding	102.767	1095.75	648.817
MYC	ENSG00000136997.10	SNAI1	C2H2 ZF	ENSG00000124216.3	0.00849694	protein_coding	1.30754	8.60721	3.42322	protein_coding	102.767	1095.75	648.817
MYC	ENSG00000136997.10	LEF1	Sox	ENSG00000138795.5	0.00718252	protein_coding	364.591	202.089	280.925	protein_coding	102.767	1095.75	648.817
MYC	ENSG00000136997.10	MGA	bHLH,T-box	ENSG00000174197.12	0.00777878	protein_coding	21.4715	52.8379	27.0435	protein_coding	102.767	1095.75	648.817
MYC	ENSG00000136997.10	ETS2	Ets	ENSG00000157557.7	0.00723973	protein_coding	7.37297	30.5099	26.3494	protein_coding	102.767	1095.75	648.817
KLF6	ENSG00000067082.10	ZNF140	C2H2 ZF	ENSG00000196387.5	0.0190668	protein_coding	7.55863	11.9829	6.05519	protein_coding	20.002	29.0863	17.9519
KLF6	ENSG00000067082.10	ZNF24	C2H2 ZF	ENSG00000172466.11	0.00944575	protein_coding	24.04	36.803	22.5491	protein_coding	20.002	29.0863	17.9519
KLF6	ENSG00000067082.10	IRF3	IRF	ENSG00000126456.11	0.00921998	protein_coding	26.1248	12.3178	23.4694	protein_coding	20.002	29.0863	17.9519
MYC	ENSG00000136997.10	SP4	C2H2 ZF	ENSG00000105866.9	0.00756867	protein_coding	25.1884	15.9254	18.3065	protein_coding	102.767	1095.75	648.817
MYC	ENSG00000136997.10	KLF13	C2H2 ZF	ENSG00000169926.5	0.00781312	protein_coding	74.148	22.3999	42.3073	protein_coding	102.767	1095.75	648.817
MYC	ENSG00000136997.10	NFAT5	Rel	ENSG00000102908.16	0.00926922	protein_coding	13.1549	54.2287	31.9488	protein_coding	102.767	1095.75	648.817
MYC	ENSG00000136997.10	ETS1	Ets	ENSG00000134954.10	0.00960627	protein_coding	452.612	162.87	218.837	protein_coding	102.767	1095.75	648.817
MYC	ENSG00000136997.10	KLF6	C2H2 ZF	ENSG00000067082.10	0.0086633	protein_coding	20.002	29.0863	17.9519	protein_coding	102.767	1095.75	648.817
MYC	ENSG00000136997.10	RELA	Rel	ENSG00000173039.14	0.0081131	protein_coding	47.6368	71.7005	69.9761	protein_coding	102.767	1095.75	648.817
MYC	ENSG00000136997.10	NFIL3	bZIP	ENSG00000165030.3	0.00789639	protein_coding	2.9022	11.3432	3.81128	protein_coding	102.767	1095.75	648.817
MYC	ENSG00000136997.10	FOXK1	Forkhead	ENSG00000164916.9	0.00798531	protein_coding	29.2615	39.2605	34.7856	protein_coding	102.767	1095.75	648.817
MYC	ENSG00000136997.10	GFI1	C2H2 ZF	ENSG00000162676.7	0.00705697	protein_coding	10.0452	202.356	83.9047	protein_coding	102.767	1095.75	648.817
KLF6	ENSG00000067082.10	MAFG	bZIP	ENSG00000197063.6	0.00716723	protein_coding	5.59852	24.4516	19.1702	protein_coding	20.002	29.0863	17.9519
KLF6	ENSG00000067082.10	GFI1	C2H2 ZF	ENSG00000162676.7	0.00954522	protein_coding	10.0452	202.356	83.9047	protein_coding	20.002	29.0863	17.9519
MYC	ENSG00000136997.10	TEF	bZIP	ENSG00000167074.10	0.008024	protein_coding	3.79114	5.07284	3.86223	protein_coding	102.767	1095.75	648.817
MYC	ENSG00000136997.10	AHR	bHLH	ENSG00000106546.8	0.00813059	protein_coding	9.41274	93.4629	53.6691	protein_coding	102.767	1095.75	648.817
KLF6	ENSG00000067082.10	BACH1	bZIP	ENSG00000156273.11	0.0117406	protein_coding	15.2362	29.6887	9.70708	protein_coding	20.002	29.0863	17.9519
MYC	ENSG00000136997.10	CREM	bZIP	ENSG00000095794.15	0.00848782	protein_coding	4.18751	35.9715	27.9649	protein_coding	102.767	1095.75	648.817
MYC	ENSG00000136997.10	NFKB1	Rel	ENSG00000109320.7	0.00791946	protein_coding	29.1567	506.789	296.345	protein_coding	102.767	1095.75	648.817
MYC	ENSG00000136997.10	ATF3	bZIP	ENSG00000162772.12	0.00799956	protein_coding	1.83901	12.5986	5.37156	protein_coding	102.767	1095.75	648.817
KLF6	ENSG00000067082.10	ZBTB6	C2H2 ZF	ENSG00000186130.4	0.0222167	protein_coding	14.1741	21.0704	12.5025	protein_coding	20.002	29.0863	17.9519
KLF6	ENSG00000067082.10	ZNF281	C2H2 ZF	ENSG00000162702.7	0.0178193	protein_coding	19.3751	26.911	17.9295	protein_coding	20.002	29.0863	17.9519
KLF6	ENSG00000067082.10	HIC2	C2H2 ZF	ENSG00000169635.5	0.0102241	protein_coding	6.41821	10.2589	5.99889	protein_coding	20.002	29.0863	17.9519
KLF6	ENSG00000067082.10	PKNOX1	Homeodomain	ENSG00000160199.10	0.0117993	protein_coding	6.08803	12.0409	6.80785	protein_coding	20.002	29.0863	17.9519
KLF6	ENSG00000067082.10	ATF7	bZIP,C2H2 ZF	ENSG00000170653.14	0.0113212	protein_coding	12.0374	9.58847	13.0137	protein_coding	20.002	29.0863	17.9519
KLF6	ENSG00000067082.10	ZNF136	C2H2 ZF	ENSG00000196646.7	0.00768465	protein_coding	7.35826	8.26587	5.50982	protein_coding	20.002	29.0863	17.9519
KLF6	ENSG00000067082.10	FOXJ2	Forkhead	ENSG00000065970.4	0.010715	protein_coding	22.3937	14.2572	23.246	protein_coding	20.002	29.0863	17.9519
ZNF16	ENSG00000170631.10	AHR	bHLH	ENSG00000106546.8	0.00938041	protein_coding	9.41274	93.4629	53.6691	protein_coding	3.93542	5.07257	4.48875
ZNF16	ENSG00000170631.10	HIC2	C2H2 ZF	ENSG00000169635.5	0.00904087	protein_coding	6.41821	10.2589	5.99889	protein_coding	3.93542	5.07257	4.48875
ZNF16	ENSG00000170631.10	STAT1	STAT	ENSG00000115415.14	0.0116099	protein_coding	35.0834	445.774	430.889	protein_coding	3.93542	5.07257	4.48875
ZNF16	ENSG00000170631.10	RELB	Rel	ENSG00000104856.9	0.008147	protein_coding	8.90223	122.195	61.4806	protein_coding	3.93542	5.07257	4.48875
ZNF16	ENSG00000170631.10	FLI1	Ets	ENSG00000151702.12	0.00890079	protein_coding	25.0796	8.22835	13.354	protein_coding	3.93542	5.07257	4.48875
RFX3	ENSG00000080298.11	ELK1	Ets	ENSG00000126767.13	0.00748136	protein_coding	18.6585	40.6808	59.8587	protein_coding	8.42273	4.67247	4.49608
RFX3	ENSG00000080298.11	JUNB	bZIP	ENSG00000171223.4	0.0115032	protein_coding	58.3256	189.229	176.615	protein_coding	8.42273	4.67247	4.49608
RFX3	ENSG00000080298.11	FOSL2	bZIP	ENSG00000075426.7	0.00753473	protein_coding	2.97949	68.8857	12.7455	protein_coding	8.42273	4.67247	4.49608
RFX3	ENSG00000080298.11	JUND	bZIP	ENSG00000130522.4	0.00881944	protein_coding	74.3572	109.809	180.846	protein_coding	8.42273	4.67247	4.49608
RFX3	ENSG00000080298.11	ATF3	bZIP	ENSG00000162772.12	0.0100967	protein_coding	1.83901	12.5986	5.37156	protein_coding	8.42273	4.67247	4.49608
RFX3	ENSG00000080298.11	NR1H2	Nuclear receptor	ENSG00000131408.9	0.00731717	protein_coding	32.619	43.1217	52.5345	protein_coding	8.42273	4.67247	4.49608
RFX3	ENSG00000080298.11	IRF8	IRF	ENSG00000140968.6	0.0128704	protein_coding	2.7126	143.835	108.547	protein_coding	8.42273	4.67247	4.49608
RFX3	ENSG00000080298.11	IRF4	IRF	ENSG00000137265.10	0.00991145	protein_coding	5.6988	783.89	464.786	protein_coding	8.42273	4.67247	4.49608
RFX3	ENSG00000080298.11	PBX3	Homeodomain	ENSG00000167081.12	0.0115201	protein_coding	9.21206	5.42354	5.54844	protein_coding	8.42273	4.67247	4.49608
RFX3	ENSG00000080298.11	TBX21	T-box	ENSG00000073861.2	0.00771743	protein_coding	2.92139	115.541	116.88	protein_coding	8.42273	4.67247	4.49608
RFX3	ENSG00000080298.11	EGR2	C2H2 ZF	ENSG00000122877.9	0.0121758	protein_coding	2.12493	158.341	31.8664	protein_coding	8.42273	4.67247	4.49608
RFX3	ENSG00000080298.11	ZNF341	C2H2 ZF	ENSG00000131061.9	0.0120592	protein_coding	4.7502	6.20738	8.51451	protein_coding	8.42273	4.67247	4.49608
RFX3	ENSG00000080298.11	AHR	bHLH	ENSG00000106546.8	0.00705508	protein_coding	9.41274	93.4629	53.6691	protein_coding	8.42273	4.67247	4.49608
RFX3	ENSG00000080298.11	FOXO1	Forkhead	ENSG00000150907.6	0.0072487	protein_coding	94.0816	55.3038	49.5386	protein_coding	8.42273	4.67247	4.49608
RFX3	ENSG00000080298.11	NR4A1	Nuclear receptor	ENSG00000123358.15	0.0112475	protein_coding	1.8162	137.343	53.2826	protein_coding	8.42273	4.67247	4.49608
RFX3	ENSG00000080298.11	NR4A2	Nuclear receptor	ENSG00000153234.9	0.00959565	protein_coding	3.08795	132.95	51.2972	protein_coding	8.42273	4.67247	4.49608
RFX3	ENSG00000080298.11	NR2C1	Nuclear receptor	ENSG00000120798.12	0.00808528	protein_coding	11.3642	5.96711	5.43842	protein_coding	8.42273	4.67247	4.49608
RFX3	ENSG00000080298.11	KLF12	C2H2 ZF	ENSG00000118922.12	0.0091299	protein_coding	53.6377	14.6764	9.57696	protein_coding	8.42273	4.67247	4.49608
RFX3	ENSG00000080298.11	MAFK	bZIP	ENSG00000198517.5	0.00736861	protein_coding	7.86877	20.1437	11.0981	protein_coding	8.42273	4.67247	4.49608
RFX3	ENSG00000080298.11	BHLHE40	bHLH	ENSG00000134107.4	0.00976781	protein_coding	3.3031	86.0234	145.299	protein_coding	8.42273	4.67247	4.49608
CREB3	ENSG00000107175.6	SP1	C2H2 ZF	ENSG00000185591.5	0.0116048	protein_coding	62.5147	64.2127	75.0785	protein_coding	9.17368	6.9742	14.5769
CREB3	ENSG00000107175.6	TCF3	bHLH	ENSG00000071564.10	0.00882397	protein_coding	18.7774	32.7741	47.0143	protein_coding	9.17368	6.9742	14.5769
CREB3	ENSG00000107175.6	CREB3L2	bZIP	ENSG00000182158.10	0.00776429	protein_coding	8.23878	10.8163	14.8018	protein_coding	9.17368	6.9742	14.5769
CREB3	ENSG00000107175.6	NFIC	SMAD	ENSG00000141905.13	0.00830464	protein_coding	14.4289	14.8113	25.0569	protein_coding	9.17368	6.9742	14.5769
CREB3	ENSG00000107175.6	ZNF263	C2H2 ZF	ENSG00000006194.6	0.00722707	protein_coding	13.8496	19.5448	8.63775	protein_coding	9.17368	6.9742	14.5769
CREB3	ENSG00000107175.6	ZNF274	C2H2 ZF	ENSG00000171606.13	0.00805357	protein_coding	11.254	11.7971	7.18352	protein_coding	9.17368	6.9742	14.5769
CREB3	ENSG00000107175.6	CTCF	C2H2 ZF	ENSG00000102974.10	0.0081287	protein_coding	50.6801	45.7903	69.2994	protein_coding	9.17368	6.9742	14.5769
CREB3	ENSG00000107175.6	HSF1	HSF	ENSG00000185122.6	0.00973137	protein_coding	21.9018	36.086	47.0488	protein_coding	9.17368	6.9742	14.5769
CREB3	ENSG00000107175.6	NR1H2	Nuclear receptor	ENSG00000131408.9	0.0129816	protein_coding	32.619	43.1217	52.5345	protein_coding	9.17368	6.9742	14.5769
CREB3	ENSG00000107175.6	NR2F6	Nuclear receptor	ENSG00000160113.5	0.00825485	protein_coding	2.22949	6.45054	10.1467	protein_coding	9.17368	6.9742	14.5769
CREB3	ENSG00000107175.6	MXI1	bHLH	ENSG00000119950.16	0.0112406	protein_coding	28.7737	21.687	11.6316	protein_coding	9.17368	6.9742	14.5769
CREB3	ENSG00000107175.6	THAP1	THAP finger	ENSG00000131931.4	0.00739441	protein_coding	10.3161	13.9612	18.6273	protein_coding	9.17368	6.9742	14.5769
CREB3	ENSG00000107175.6	TFDP1	E2F	ENSG00000198176.8	0.0103105	protein_coding	10.5546	23.5774	99.2647	protein_coding	9.17368	6.9742	14.5769
CREB3	ENSG00000107175.6	STAT5B	STAT	ENSG00000173757.5	0.00878326	protein_coding	79.7973	88.8999	50.9057	protein_coding	9.17368	6.9742	14.5769
GATA3	ENSG00000107485.11	ZNF75D	C2H2 ZF	ENSG00000186376.10	0.00879461	protein_coding	8.38859	2.948	2.23164	protein_coding	27.0461	22.0926	11.966
KLF9	ENSG00000119138.3	ZNF460	C2H2 ZF	ENSG00000197714.4	0.0077413	protein_coding	31.8465	67.1283	30.8887	protein_coding	14.7466	42.3805	19.3454
KLF9	ENSG00000119138.3	NRF1	Unknown	ENSG00000106459.10	0.00850966	protein_coding	12.1101	19.1807	7.90798	protein_coding	14.7466	42.3805	19.3454
KLF9	ENSG00000119138.3	KLF6	C2H2 ZF	ENSG00000067082.10	0.00954591	protein_coding	20.002	29.0863	17.9519	protein_coding	14.7466	42.3805	19.3454
KLF9	ENSG00000119138.3	KLF10	C2H2 ZF	ENSG00000155090.10	0.00707894	protein_coding	2.98347	101.32	25.2161	protein_coding	14.7466	42.3805	19.3454
KLF9	ENSG00000119138.3	IRF3	IRF	ENSG00000126456.11	0.00711885	protein_coding	26.1248	12.3178	23.4694	protein_coding	14.7466	42.3805	19.3454
KLF9	ENSG00000119138.3	SOX12	Sox	ENSG00000177732.6	0.00963995	protein_coding	11.96	7.80491	17.9188	protein_coding	14.7466	42.3805	19.3454
KLF9	ENSG00000119138.3	FOSL1	bZIP	ENSG00000175592.4	0.00999713	protein_coding	1.60479	151.689	60.6658	protein_coding	14.7466	42.3805	19.3454
KLF9	ENSG00000119138.3	SMAD2	NA	ENSG00000175387.11	0.00702011	protein_coding	21.3528	16.7268	18.7465	protein_coding	14.7466	42.3805	19.3454
KLF9	ENSG00000119138.3	FOSB	bZIP	ENSG00000125740.9	0.0071446	protein_coding	1.38153	14.6115	1.57442	protein_coding	14.7466	42.3805	19.3454
KLF9	ENSG00000119138.3	IRF9	IRF	ENSG00000213928.4	0.0135346	protein_coding	3.67368	6.92631	4.52713	protein_coding	14.7466	42.3805	19.3454
KLF9	ENSG00000119138.3	ARNT	bHLH	ENSG00000143437.16	0.00817796	protein_coding	23.8486	13.5725	25.4699	protein_coding	14.7466	42.3805	19.3454
KLF9	ENSG00000119138.3	USF2	bHLH	ENSG00000105698.11	0.00735843	protein_coding	40.5727	17.8351	31.9485	protein_coding	14.7466	42.3805	19.3454
KLF9	ENSG00000119138.3	FOXN3	Forkhead	ENSG00000053254.11	0.00740873	protein_coding	27.663	22.1201	34.2645	protein_coding	14.7466	42.3805	19.3454
GATA3	ENSG00000107485.11	STAT3	STAT	ENSG00000168610.10	0.0100144	protein_coding	27.8495	92.8121	111.384	protein_coding	27.0461	22.0926	11.966
GATA3	ENSG00000107485.11	HSF1	HSF	ENSG00000185122.6	0.00721039	protein_coding	21.9018	36.086	47.0488	protein_coding	27.0461	22.0926	11.966
GATA3	ENSG00000107485.11	IRF8	IRF	ENSG00000140968.6	0.00951678	protein_coding	2.7126	143.835	108.547	protein_coding	27.0461	22.0926	11.966
GATA3	ENSG00000107485.11	IRF7	IRF	ENSG00000185507.15	0.00736847	protein_coding	18.8744	15.4072	9.72413	protein_coding	27.0461	22.0926	11.966
GATA3	ENSG00000107485.11	VEZF1	C2H2 ZF	ENSG00000136451.4	0.0112199	protein_coding	35.7029	28.3574	20.778	protein_coding	27.0461	22.0926	11.966
GATA3	ENSG00000107485.11	KLF16	C2H2 ZF	ENSG00000129911.4	0.00703584	protein_coding	11.7561	43.2471	45.3241	protein_coding	27.0461	22.0926	11.966
GATA3	ENSG00000107485.11	MZF1	C2H2 ZF	ENSG00000099326.4	0.00711175	protein_coding	11.9589	11.2526	7.29446	protein_coding	27.0461	22.0926	11.966
GATA3	ENSG00000107485.11	MAZ	C2H2 ZF	ENSG00000103495.9	0.00704676	protein_coding	71.6034	91.0371	189.127	protein_coding	27.0461	22.0926	11.966
GATA3	ENSG00000107485.11	ZNF148	NA	ENSG00000163848.14	0.00905113	protein_coding	16.9975	14.7542	13.1656	protein_coding	27.0461	22.0926	11.966
GATA3	ENSG00000107485.11	FOXO3	Forkhead	ENSG00000118689.10	0.00823542	protein_coding	9.87318	6.89084	3.15724	protein_coding	27.0461	22.0926	11.966
GATA3	ENSG00000107485.11	YY1	C2H2 ZF	ENSG00000100811.6	0.00894047	protein_coding	24.0952	26.6803	30.2082	protein_coding	27.0461	22.0926	11.966
GATA3	ENSG00000107485.11	KLF12	C2H2 ZF	ENSG00000118922.12	0.00778129	protein_coding	53.6377	14.6764	9.57696	protein_coding	27.0461	22.0926	11.966
GATA3	ENSG00000107485.11	NFKB2	Rel	ENSG00000077150.13	0.00734796	protein_coding	22.2687	178.43	201.908	protein_coding	27.0461	22.0926	11.966
GATA3	ENSG00000107485.11	NR1H2	Nuclear receptor	ENSG00000131408.9	0.0120194	protein_coding	32.619	43.1217	52.5345	protein_coding	27.0461	22.0926	11.966
GATA3	ENSG00000107485.11	BHLHE40	bHLH	ENSG00000134107.4	0.00921494	protein_coding	3.3031	86.0234	145.299	protein_coding	27.0461	22.0926	11.966
NFIL3	ENSG00000165030.3	MYC	bHLH	ENSG00000136997.10	0.00897598	protein_coding	102.767	1095.75	648.817	protein_coding	2.9022	11.3432	3.81128
NFIL3	ENSG00000165030.3	SMAD2	NA	ENSG00000175387.11	0.0110202	protein_coding	21.3528	16.7268	18.7465	protein_coding	2.9022	11.3432	3.81128
NFIL3	ENSG00000165030.3	ARNT	bHLH	ENSG00000143437.16	0.00835105	protein_coding	23.8486	13.5725	25.4699	protein_coding	2.9022	11.3432	3.81128
NFIL3	ENSG00000165030.3	HIF1A	bHLH	ENSG00000100644.12	0.00771536	protein_coding	37.8509	193.534	125.593	protein_coding	2.9022	11.3432	3.81128
NFIL3	ENSG00000165030.3	HIC2	C2H2 ZF	ENSG00000169635.5	0.00760097	protein_coding	6.41821	10.2589	5.99889	protein_coding	2.9022	11.3432	3.81128
NFIL3	ENSG00000165030.3	ETS2	Ets	ENSG00000157557.7	0.00780421	protein_coding	7.37297	30.5099	26.3494	protein_coding	2.9022	11.3432	3.81128
NFIL3	ENSG00000165030.3	ELK4	Ets	ENSG00000158711.9	0.0100866	protein_coding	67.4856	107.039	70.1592	protein_coding	2.9022	11.3432	3.81128
NFIL3	ENSG00000165030.3	FOSL1	bZIP	ENSG00000175592.4	0.00780924	protein_coding	1.60479	151.689	60.6658	protein_coding	2.9022	11.3432	3.81128
NFIL3	ENSG00000165030.3	JUNB	bZIP	ENSG00000171223.4	0.0127554	protein_coding	58.3256	189.229	176.615	protein_coding	2.9022	11.3432	3.81128
NFIL3	ENSG00000165030.3	LEF1	Sox	ENSG00000138795.5	0.010661	protein_coding	364.591	202.089	280.925	protein_coding	2.9022	11.3432	3.81128
NFIL3	ENSG00000165030.3	BATF3	bZIP	ENSG00000123685.4	0.0124532	protein_coding	1.65811	41.5687	22.1585	protein_coding	2.9022	11.3432	3.81128
NFIL3	ENSG00000165030.3	BACH2	bZIP	ENSG00000112182.10	0.00954823	protein_coding	49.8115	217.835	76.7515	protein_coding	2.9022	11.3432	3.81128
NFIL3	ENSG00000165030.3	NFIX	SMAD	ENSG00000008441.12	0.00726124	protein_coding	4.02934	24.3211	14.9281	protein_coding	2.9022	11.3432	3.81128
NFIL3	ENSG00000165030.3	PBX2	Homeodomain	ENSG00000204304.7	0.00873295	protein_coding	31.7444	13.5005	19.866	protein_coding	2.9022	11.3432	3.81128
NFIL3	ENSG00000165030.3	NFAT5	Rel	ENSG00000102908.16	0.0118385	protein_coding	13.1549	54.2287	31.9488	protein_coding	2.9022	11.3432	3.81128
NFIL3	ENSG00000165030.3	FOXJ3	Forkhead	ENSG00000198815.4	0.00843532	protein_coding	35.5573	47.1979	34.4884	protein_coding	2.9022	11.3432	3.81128
NFIL3	ENSG00000165030.3	IRF8	IRF	ENSG00000140968.6	0.00773464	protein_coding	2.7126	143.835	108.547	protein_coding	2.9022	11.3432	3.81128
NFIL3	ENSG00000165030.3	AHR	bHLH	ENSG00000106546.8	0.0120076	protein_coding	9.41274	93.4629	53.6691	protein_coding	2.9022	11.3432	3.81128
NFIL3	ENSG00000165030.3	HLTF	NA	ENSG00000071794.11	0.0075837	protein_coding	10.3092	5.83055	9.54802	protein_coding	2.9022	11.3432	3.81128
NFIL3	ENSG00000165030.3	RARG	Nuclear receptor	ENSG00000172819.12	0.0089136	protein_coding	16.4433	7.00141	13.5178	protein_coding	2.9022	11.3432	3.81128
NFIL3	ENSG00000165030.3	SP2	C2H2 ZF	ENSG00000167182.11	0.0138972	protein_coding	34.5701	58.9216	43.343	protein_coding	2.9022	11.3432	3.81128
NFIL3	ENSG00000165030.3	TCFL5	bHLH	ENSG00000101190.8	0.00820014	protein_coding	7.68045	6.17238	7.05429	protein_coding	2.9022	11.3432	3.81128
NFIL3	ENSG00000165030.3	ZNF460	C2H2 ZF	ENSG00000197714.4	0.00936206	protein_coding	31.8465	67.1283	30.8887	protein_coding	2.9022	11.3432	3.81128
NFIL3	ENSG00000165030.3	KLF6	C2H2 ZF	ENSG00000067082.10	0.0135559	protein_coding	20.002	29.0863	17.9519	protein_coding	2.9022	11.3432	3.81128
MSANTD3	ENSG00000066697.10	MNT	bHLH	ENSG00000070444.10	0.00935039	protein_coding	13.6034	20.317	11.22	protein_coding	5.32575	3.26369	6.82814
MSANTD3	ENSG00000066697.10	SP3	C2H2 ZF	ENSG00000172845.9	0.00799095	protein_coding	25.2192	19.597	24.3094	protein_coding	5.32575	3.26369	6.82814
MSANTD3	ENSG00000066697.10	ZFX	C2H2 ZF	ENSG00000005889.11	0.00889248	protein_coding	19.9518	25.546	15.9478	protein_coding	5.32575	3.26369	6.82814
GATA3	ENSG00000107485.11	THAP1	THAP finger	ENSG00000131931.4	0.00734815	protein_coding	10.3161	13.9612	18.6273	protein_coding	27.0461	22.0926	11.966
GMEB1	ENSG00000162419.8	E2F6	E2F	ENSG00000169016.12	0.00780423	protein_coding	2.84755	10.2704	6.21233	protein_coding	7.06271	17.2753	14.2273
ZBTB6	ENSG00000186130.4	ZBTB14	C2H2 ZF	ENSG00000198081.6	0.00850562	protein_coding	22.0902	8.83913	14.8651	protein_coding	14.1741	21.0704	12.5025
ZBTB26	ENSG00000171448.8	MAZ	C2H2 ZF	ENSG00000103495.9	0.00794232	protein_coding	71.6034	91.0371	189.127	protein_coding	7.63083	7.51462	5.22584
ZBTB26	ENSG00000171448.8	MLX	bHLH	ENSG00000108788.7	0.0102972	protein_coding	19.8728	32.4765	59.2937	protein_coding	7.63083	7.51462	5.22584
ZBTB26	ENSG00000171448.8	THAP11	THAP finger	ENSG00000168286.1	0.00755646	protein_coding	44.1418	46.0762	84.2597	protein_coding	7.63083	7.51462	5.22584
ZBTB26	ENSG00000171448.8	ZBTB18	C2H2 ZF	ENSG00000179456.9	0.00889069	protein_coding	104.724	28.3132	11.2869	protein_coding	7.63083	7.51462	5.22584
ZBTB26	ENSG00000171448.8	TCF3	bHLH	ENSG00000071564.10	0.00836727	protein_coding	18.7774	32.7741	47.0143	protein_coding	7.63083	7.51462	5.22584
ZBTB26	ENSG00000171448.8	ZNF528	C2H2 ZF	ENSG00000167555.9	0.0109205	protein_coding	6.29283	4.82699	1.29655	protein_coding	7.63083	7.51462	5.22584
ZBTB26	ENSG00000171448.8	JUN	bZIP	ENSG00000177606.5	0.00841651	protein_coding	7.94923	14.3257	6.56083	protein_coding	7.63083	7.51462	5.22584
PBX3	ENSG00000167081.12	LEF1	Sox	ENSG00000138795.5	0.00708248	protein_coding	364.591	202.089	280.925	protein_coding	9.21206	5.42354	5.54844
PBX3	ENSG00000167081.12	NR2C2	Nuclear receptor	ENSG00000177463.11	0.00756254	protein_coding	25.6732	14.2385	18.4864	protein_coding	9.21206	5.42354	5.54844
PBX3	ENSG00000167081.12	KLF9	C2H2 ZF	ENSG00000119138.3	0.00743686	protein_coding	14.7466	42.3805	19.3454	protein_coding	9.21206	5.42354	5.54844
PBX3	ENSG00000167081.12	ZNF148	NA	ENSG00000163848.14	0.0080524	protein_coding	16.9975	14.7542	13.1656	protein_coding	9.21206	5.42354	5.54844
PBX3	ENSG00000167081.12	ETS1	Ets	ENSG00000134954.10	0.00959131	protein_coding	452.612	162.87	218.837	protein_coding	9.21206	5.42354	5.54844
PBX3	ENSG00000167081.12	SP4	C2H2 ZF	ENSG00000105866.9	0.00726751	protein_coding	25.1884	15.9254	18.3065	protein_coding	9.21206	5.42354	5.54844
PBX3	ENSG00000167081.12	TBX21	T-box	ENSG00000073861.2	0.0114343	protein_coding	2.92139	115.541	116.88	protein_coding	9.21206	5.42354	5.54844
PBX3	ENSG00000167081.12	MEF2D	MADS box	ENSG00000116604.13	0.00799999	protein_coding	36.798	25.1847	25.5343	protein_coding	9.21206	5.42354	5.54844
PBX3	ENSG00000167081.12	SNAI3	C2H2 ZF	ENSG00000185669.5	0.00899569	protein_coding	7.15207	2.50655	4.45566	protein_coding	9.21206	5.42354	5.54844
PBX3	ENSG00000167081.12	ZNF384	C2H2 ZF	ENSG00000126746.13	0.00866913	protein_coding	26.7544	40.1547	40.9261	protein_coding	9.21206	5.42354	5.54844
PBX3	ENSG00000167081.12	CUX1	CUT,Homeodomain	ENSG00000257923.5	0.0131795	protein_coding	11.876	9.90491	6.20826	protein_coding	9.21206	5.42354	5.54844
PBX3	ENSG00000167081.12	HIC1	C2H2 ZF	ENSG00000177374.8	0.00839832	protein_coding	1.90744	22.6054	41.0085	protein_coding	9.21206	5.42354	5.54844
PBX3	ENSG00000167081.12	HINFP	C2H2 ZF	ENSG00000172273.8	0.0143316	protein_coding	8.65374	5.69092	4.99144	protein_coding	9.21206	5.42354	5.54844
PBX3	ENSG00000167081.12	ZNF354C	C2H2 ZF	ENSG00000177932.6	0.0115127	protein_coding	8.44028	6.87653	5.68326	protein_coding	9.21206	5.42354	5.54844
GMEB1	ENSG00000162419.8	ETS2	Ets	ENSG00000157557.7	0.00803045	protein_coding	7.37297	30.5099	26.3494	protein_coding	7.06271	17.2753	14.2273
GMEB1	ENSG00000162419.8	FLI1	Ets	ENSG00000151702.12	0.00963131	protein_coding	25.0796	8.22835	13.354	protein_coding	7.06271	17.2753	14.2273
GMEB1	ENSG00000162419.8	KLF16	C2H2 ZF	ENSG00000129911.4	0.0082518	protein_coding	11.7561	43.2471	45.3241	protein_coding	7.06271	17.2753	14.2273
GMEB1	ENSG00000162419.8	KLF10	C2H2 ZF	ENSG00000155090.10	0.012043	protein_coding	2.98347	101.32	25.2161	protein_coding	7.06271	17.2753	14.2273
ZFX	ENSG00000005889.11	RARG	Nuclear receptor	ENSG00000172819.12	0.00866443	protein_coding	16.4433	7.00141	13.5178	protein_coding	19.9518	25.546	15.9478
ZFX	ENSG00000005889.11	STAT5B	STAT	ENSG00000173757.5	0.0211132	protein_coding	79.7973	88.8999	50.9057	protein_coding	19.9518	25.546	15.9478
ELK1	ENSG00000126767.13	KLF12	C2H2 ZF	ENSG00000118922.12	0.0103368	protein_coding	53.6377	14.6764	9.57696	protein_coding	18.6585	40.6808	59.8587
ELK1	ENSG00000126767.13	KLF2	C2H2 ZF	ENSG00000127528.5	0.00791557	protein_coding	643.228	77.5309	3.57086	protein_coding	18.6585	40.6808	59.8587
ELK1	ENSG00000126767.13	TCF3	bHLH	ENSG00000071564.10	0.00828786	protein_coding	18.7774	32.7741	47.0143	protein_coding	18.6585	40.6808	59.8587
ELK1	ENSG00000126767.13	NFIC	SMAD	ENSG00000141905.13	0.00729505	protein_coding	14.4289	14.8113	25.0569	protein_coding	18.6585	40.6808	59.8587
ELK1	ENSG00000126767.13	ATF1	bZIP	ENSG00000123268.4	0.00769029	protein_coding	14.2756	30.5257	29.5574	protein_coding	18.6585	40.6808	59.8587
ELK1	ENSG00000126767.13	MAZ	C2H2 ZF	ENSG00000103495.9	0.00896439	protein_coding	71.6034	91.0371	189.127	protein_coding	18.6585	40.6808	59.8587
TFE3	ENSG00000068323.12	KLF2	C2H2 ZF	ENSG00000127528.5	0.0070155	protein_coding	643.228	77.5309	3.57086	protein_coding	14.5099	17.4215	23.2081
TFE3	ENSG00000068323.12	KLF11	C2H2 ZF	ENSG00000172059.6	0.00955715	protein_coding	3.5389	6.49125	9.48579	protein_coding	14.5099	17.4215	23.2081
FOXP3	ENSG00000049768.10	MZF1	C2H2 ZF	ENSG00000099326.4	0.0218934	protein_coding	11.9589	11.2526	7.29446	protein_coding	2.19489	3.42871	6.75386
FOXP3	ENSG00000049768.10	BACH1	bZIP	ENSG00000156273.11	0.00705407	protein_coding	15.2362	29.6887	9.70708	protein_coding	2.19489	3.42871	6.75386
FOXP3	ENSG00000049768.10	JUND	bZIP	ENSG00000130522.4	0.00912129	protein_coding	74.3572	109.809	180.846	protein_coding	2.19489	3.42871	6.75386
FOXP3	ENSG00000049768.10	IKZF1	C2H2 ZF	ENSG00000185811.12	0.0123073	protein_coding	140.55	182.375	130.244	protein_coding	2.19489	3.42871	6.75386
FOXP3	ENSG00000049768.10	ELF1	Ets	ENSG00000120690.9	0.0104591	protein_coding	72.2458	77.2599	48.5997	protein_coding	2.19489	3.42871	6.75386
FOXP3	ENSG00000049768.10	ZFX	C2H2 ZF	ENSG00000005889.11	0.0122192	protein_coding	19.9518	25.546	15.9478	protein_coding	2.19489	3.42871	6.75386
FOXP3	ENSG00000049768.10	RUNX3	Runt	ENSG00000020633.14	0.0139329	protein_coding	47.4684	73.1236	109.548	protein_coding	2.19489	3.42871	6.75386
FOXO4	ENSG00000184481.12	FOXP3	Forkhead	ENSG00000049768.10	0.0108931	protein_coding	2.19489	3.42871	6.75386	protein_coding	16.4678	5.06429	4.3744
FOXO4	ENSG00000184481.12	E2F6	E2F	ENSG00000169016.12	0.00742194	protein_coding	2.84755	10.2704	6.21233	protein_coding	16.4678	5.06429	4.3744
FOXO4	ENSG00000184481.12	MYB	Myb/SANT	ENSG00000118513.14	0.0102501	protein_coding	8.9003	38.6206	20.9037	protein_coding	16.4678	5.06429	4.3744
FOXO4	ENSG00000184481.12	EGR1	C2H2 ZF	ENSG00000120738.7	0.0108625	protein_coding	2.10936	136.228	76.4968	protein_coding	16.4678	5.06429	4.3744
FOXO4	ENSG00000184481.12	FOXK1	Forkhead	ENSG00000164916.9	0.00920659	protein_coding	29.2615	39.2605	34.7856	protein_coding	16.4678	5.06429	4.3744
FOXO4	ENSG00000184481.12	ETS2	Ets	ENSG00000157557.7	0.00891786	protein_coding	7.37297	30.5099	26.3494	protein_coding	16.4678	5.06429	4.3744
FOXO4	ENSG00000184481.12	ELK1	Ets	ENSG00000126767.13	0.00859415	protein_coding	18.6585	40.6808	59.8587	protein_coding	16.4678	5.06429	4.3744
FOXO4	ENSG00000184481.12	NFATC1	Rel	ENSG00000131196.13	0.0096822	protein_coding	26.5075	58.5079	62.1764	protein_coding	16.4678	5.06429	4.3744
FOXO4	ENSG00000184481.12	RARA	Nuclear receptor	ENSG00000131759.13	0.00763393	protein_coding	25.5426	71.9467	62.8849	protein_coding	16.4678	5.06429	4.3744
FOXO4	ENSG00000184481.12	NFKB1	Rel	ENSG00000109320.7	0.00750822	protein_coding	29.1567	506.789	296.345	protein_coding	16.4678	5.06429	4.3744
FOXO4	ENSG00000184481.12	ZNF282	C2H2 ZF	ENSG00000170265.7	0.00879573	protein_coding	10.0338	13.1235	24.7383	protein_coding	16.4678	5.06429	4.3744
FOXO4	ENSG00000184481.12	EGR2	C2H2 ZF	ENSG00000122877.9	0.00868107	protein_coding	2.12493	158.341	31.8664	protein_coding	16.4678	5.06429	4.3744
GMEB1	ENSG00000162419.8	KLF9	C2H2 ZF	ENSG00000119138.3	0.00802096	protein_coding	14.7466	42.3805	19.3454	protein_coding	7.06271	17.2753	14.2273
GMEB1	ENSG00000162419.8	ZBTB14	C2H2 ZF	ENSG00000198081.6	0.00738769	protein_coding	22.0902	8.83913	14.8651	protein_coding	7.06271	17.2753	14.2273
ELF4	ENSG00000102034.12	CTCF	C2H2 ZF	ENSG00000102974.10	0.0154291	protein_coding	50.6801	45.7903	69.2994	protein_coding	26.4618	20.1657	33.0515
ELF4	ENSG00000102034.12	STAT5B	STAT	ENSG00000173757.5	0.013602	protein_coding	79.7973	88.8999	50.9057	protein_coding	26.4618	20.1657	33.0515
ELF4	ENSG00000102034.12	IRF2	IRF	ENSG00000168310.6	0.00796338	protein_coding	38.8138	22.4929	43.0542	protein_coding	26.4618	20.1657	33.0515
ELF4	ENSG00000102034.12	LIN54	TCR/CxC	ENSG00000189308.6	0.0105605	protein_coding	8.21127	3.97463	10.4772	protein_coding	26.4618	20.1657	33.0515
ELF4	ENSG00000102034.12	FOXN3	Forkhead	ENSG00000053254.11	0.0097529	protein_coding	27.663	22.1201	34.2645	protein_coding	26.4618	20.1657	33.0515
ELF4	ENSG00000102034.12	ZNF263	C2H2 ZF	ENSG00000006194.6	0.0120188	protein_coding	13.8496	19.5448	8.63775	protein_coding	26.4618	20.1657	33.0515
ELF4	ENSG00000102034.12	FOXJ3	Forkhead	ENSG00000198815.4	0.00936158	protein_coding	35.5573	47.1979	34.4884	protein_coding	26.4618	20.1657	33.0515
ZNF449	ENSG00000173275.8	MAZ	C2H2 ZF	ENSG00000103495.9	0.0100709	protein_coding	71.6034	91.0371	189.127	protein_coding	5.83095	1.93546	1.12909
ZNF75D	ENSG00000186376.10	KLF16	C2H2 ZF	ENSG00000129911.4	0.00731326	protein_coding	11.7561	43.2471	45.3241	protein_coding	8.38859	2.948	2.23164
ZNF75D	ENSG00000186376.10	KLF11	C2H2 ZF	ENSG00000172059.6	0.00753888	protein_coding	3.5389	6.49125	9.48579	protein_coding	8.38859	2.948	2.23164
ZNF75D	ENSG00000186376.10	E2F6	E2F	ENSG00000169016.12	0.00952859	protein_coding	2.84755	10.2704	6.21233	protein_coding	8.38859	2.948	2.23164
ZNF75D	ENSG00000186376.10	TFDP1	E2F	ENSG00000198176.8	0.00948774	protein_coding	10.5546	23.5774	99.2647	protein_coding	8.38859	2.948	2.23164
ZNF75D	ENSG00000186376.10	KLF12	C2H2 ZF	ENSG00000118922.12	0.00814077	protein_coding	53.6377	14.6764	9.57696	protein_coding	8.38859	2.948	2.23164
ZEB1	ENSG00000148516.17	TCF3	bHLH	ENSG00000071564.10	0.00876271	protein_coding	18.7774	32.7741	47.0143	protein_coding	30.5601	27.0703	15.1315
ZEB1	ENSG00000148516.17	MZF1	C2H2 ZF	ENSG00000099326.4	0.00847631	protein_coding	11.9589	11.2526	7.29446	protein_coding	30.5601	27.0703	15.1315
ZEB1	ENSG00000148516.17	ELF1	Ets	ENSG00000120690.9	0.0124567	protein_coding	72.2458	77.2599	48.5997	protein_coding	30.5601	27.0703	15.1315
ZEB1	ENSG00000148516.17	ZBTB12	C2H2 ZF	ENSG00000204366.3	0.0108498	protein_coding	4.70516	5.64622	9.58069	protein_coding	30.5601	27.0703	15.1315
ZEB1	ENSG00000148516.17	ZNF341	C2H2 ZF	ENSG00000131061.9	0.0201526	protein_coding	4.7502	6.20738	8.51451	protein_coding	30.5601	27.0703	15.1315
ZEB1	ENSG00000148516.17	FOXP3	Forkhead	ENSG00000049768.10	0.0136247	protein_coding	2.19489	3.42871	6.75386	protein_coding	30.5601	27.0703	15.1315
ZEB1	ENSG00000148516.17	ZNF354C	C2H2 ZF	ENSG00000177932.6	0.0189367	protein_coding	8.44028	6.87653	5.68326	protein_coding	30.5601	27.0703	15.1315
ZEB1	ENSG00000148516.17	FOXO1	Forkhead	ENSG00000150907.6	0.0137287	protein_coding	94.0816	55.3038	49.5386	protein_coding	30.5601	27.0703	15.1315
ZEB1	ENSG00000148516.17	SMAD4	SMAD	ENSG00000141646.9	0.00838454	protein_coding	13.9346	9.28591	7.65724	protein_coding	30.5601	27.0703	15.1315
ZEB1	ENSG00000148516.17	ZNF148	NA	ENSG00000163848.14	0.0102931	protein_coding	16.9975	14.7542	13.1656	protein_coding	30.5601	27.0703	15.1315
ZEB1	ENSG00000148516.17	GATA3	GATA	ENSG00000107485.11	0.0189945	protein_coding	27.0461	22.0926	11.966	protein_coding	30.5601	27.0703	15.1315
ZEB1	ENSG00000148516.17	MEF2A	MADS box	ENSG00000068305.13	0.00983735	protein_coding	17.5747	16.3968	11.6467	protein_coding	30.5601	27.0703	15.1315
ZEB1	ENSG00000148516.17	KLF11	C2H2 ZF	ENSG00000172059.6	0.00963226	protein_coding	3.5389	6.49125	9.48579	protein_coding	30.5601	27.0703	15.1315
ZEB1	ENSG00000148516.17	NFIC	SMAD	ENSG00000141905.13	0.00976304	protein_coding	14.4289	14.8113	25.0569	protein_coding	30.5601	27.0703	15.1315
ZEB1	ENSG00000148516.17	TFDP1	E2F	ENSG00000198176.8	0.0110286	protein_coding	10.5546	23.5774	99.2647	protein_coding	30.5601	27.0703	15.1315
ZEB1	ENSG00000148516.17	HSF1	HSF	ENSG00000185122.6	0.00954453	protein_coding	21.9018	36.086	47.0488	protein_coding	30.5601	27.0703	15.1315
ZEB1	ENSG00000148516.17	HMBOX1	Homeodomain	ENSG00000147421.13	0.00741155	protein_coding	23.4512	16.7878	14.3124	protein_coding	30.5601	27.0703	15.1315
ZEB1	ENSG00000148516.17	NR1H2	Nuclear receptor	ENSG00000131408.9	0.00968678	protein_coding	32.619	43.1217	52.5345	protein_coding	30.5601	27.0703	15.1315
ZEB1	ENSG00000148516.17	NR2F6	Nuclear receptor	ENSG00000160113.5	0.0127706	protein_coding	2.22949	6.45054	10.1467	protein_coding	30.5601	27.0703	15.1315
ZEB1	ENSG00000148516.17	ZBTB32	C2H2 ZF	ENSG00000011590.9	0.00949017	protein_coding	1.62528	8.92416	31.9888	protein_coding	30.5601	27.0703	15.1315
ZEB1	ENSG00000148516.17	MYBL2	Myb/SANT	ENSG00000101057.11	0.0118574	protein_coding	2.4692	2.5686	47.0143	protein_coding	30.5601	27.0703	15.1315
ZEB1	ENSG00000148516.17	E2F2	E2F	ENSG00000007968.6	0.00789856	protein_coding	1.28522	1.38068	13.9787	protein_coding	30.5601	27.0703	15.1315
CREM	ENSG00000095794.15	EGR1	C2H2 ZF	ENSG00000120738.7	0.00739969	protein_coding	2.10936	136.228	76.4968	protein_coding	4.18751	35.9715	27.9649
CREM	ENSG00000095794.15	E2F6	E2F	ENSG00000169016.12	0.00942784	protein_coding	2.84755	10.2704	6.21233	protein_coding	4.18751	35.9715	27.9649
CREM	ENSG00000095794.15	AHR	bHLH	ENSG00000106546.8	0.00756756	protein_coding	9.41274	93.4629	53.6691	protein_coding	4.18751	35.9715	27.9649
CREM	ENSG00000095794.15	TFAP4	bHLH	ENSG00000090447.7	0.00753355	protein_coding	6.44111	12.8682	14.9109	protein_coding	4.18751	35.9715	27.9649
CREM	ENSG00000095794.15	ZBTB14	C2H2 ZF	ENSG00000198081.6	0.00736756	protein_coding	22.0902	8.83913	14.8651	protein_coding	4.18751	35.9715	27.9649
CREM	ENSG00000095794.15	IRF4	IRF	ENSG00000137265.10	0.0102407	protein_coding	5.6988	783.89	464.786	protein_coding	4.18751	35.9715	27.9649
CREM	ENSG00000095794.15	ZBTB18	C2H2 ZF	ENSG00000179456.9	0.00734847	protein_coding	104.724	28.3132	11.2869	protein_coding	4.18751	35.9715	27.9649
CREM	ENSG00000095794.15	HSF2	HSF	ENSG00000025156.8	0.00763218	protein_coding	20.2022	22.7886	23.1956	protein_coding	4.18751	35.9715	27.9649
CREM	ENSG00000095794.15	NFATC1	Rel	ENSG00000131196.13	0.00746994	protein_coding	26.5075	58.5079	62.1764	protein_coding	4.18751	35.9715	27.9649
CREM	ENSG00000095794.15	STAT5A	STAT	ENSG00000126561.12	0.0100361	protein_coding	36.4983	316.372	118.146	protein_coding	4.18751	35.9715	27.9649
CREM	ENSG00000095794.15	FOSL1	bZIP	ENSG00000175592.4	0.00728631	protein_coding	1.60479	151.689	60.6658	protein_coding	4.18751	35.9715	27.9649
CREM	ENSG00000095794.15	ZNF384	C2H2 ZF	ENSG00000126746.13	0.00768555	protein_coding	26.7544	40.1547	40.9261	protein_coding	4.18751	35.9715	27.9649
CREM	ENSG00000095794.15	ZNF75D	C2H2 ZF	ENSG00000186376.10	0.00741753	protein_coding	8.38859	2.948	2.23164	protein_coding	4.18751	35.9715	27.9649
CREM	ENSG00000095794.15	MTF1	C2H2 ZF	ENSG00000188786.9	0.00909708	protein_coding	10.1249	31.2324	26.6528	protein_coding	4.18751	35.9715	27.9649
CREM	ENSG00000095794.15	RUNX3	Runt	ENSG00000020633.14	0.00816834	protein_coding	47.4684	73.1236	109.548	protein_coding	4.18751	35.9715	27.9649
CREM	ENSG00000095794.15	CEBPG	bZIP	ENSG00000153879.4	0.00702578	protein_coding	9.95546	26.2151	15.8662	protein_coding	4.18751	35.9715	27.9649
CREM	ENSG00000095794.15	SNAI1	C2H2 ZF	ENSG00000124216.3	0.00739033	protein_coding	1.30754	8.60721	3.42322	protein_coding	4.18751	35.9715	27.9649
CREM	ENSG00000095794.15	MAFK	bZIP	ENSG00000198517.5	0.00837012	protein_coding	7.86877	20.1437	11.0981	protein_coding	4.18751	35.9715	27.9649
CREM	ENSG00000095794.15	ESRRA	Nuclear receptor	ENSG00000173153.9	0.00793005	protein_coding	8.26157	35.9147	35.2063	protein_coding	4.18751	35.9715	27.9649
CREM	ENSG00000095794.15	PRDM15	NA	ENSG00000141956.9	0.00971088	protein_coding	4.15744	9.23077	6.49964	protein_coding	4.18751	35.9715	27.9649
CREM	ENSG00000095794.15	NFE2L2	bZIP	ENSG00000116044.11	0.00974688	protein_coding	43.1876	100.955	67.5731	protein_coding	4.18751	35.9715	27.9649
EGR2	ENSG00000122877.9	FOXN3	Forkhead	ENSG00000053254.11	0.00782979	protein_coding	27.663	22.1201	34.2645	protein_coding	2.12493	158.341	31.8664
EGR2	ENSG00000122877.9	FOSL1	bZIP	ENSG00000175592.4	0.00844265	protein_coding	1.60479	151.689	60.6658	protein_coding	2.12493	158.341	31.8664
EGR2	ENSG00000122877.9	FOSL2	bZIP	ENSG00000075426.7	0.00886397	protein_coding	2.97949	68.8857	12.7455	protein_coding	2.12493	158.341	31.8664
EGR2	ENSG00000122877.9	BACH1	bZIP	ENSG00000156273.11	0.0144242	protein_coding	15.2362	29.6887	9.70708	protein_coding	2.12493	158.341	31.8664
EGR2	ENSG00000122877.9	FOSB	bZIP	ENSG00000125740.9	0.00996975	protein_coding	1.38153	14.6115	1.57442	protein_coding	2.12493	158.341	31.8664
EGR2	ENSG00000122877.9	SMAD2	NA	ENSG00000175387.11	0.0103772	protein_coding	21.3528	16.7268	18.7465	protein_coding	2.12493	158.341	31.8664
EGR2	ENSG00000122877.9	BACH2	bZIP	ENSG00000112182.10	0.0096963	protein_coding	49.8115	217.835	76.7515	protein_coding	2.12493	158.341	31.8664
EGR2	ENSG00000122877.9	PKNOX1	Homeodomain	ENSG00000160199.10	0.0104233	protein_coding	6.08803	12.0409	6.80785	protein_coding	2.12493	158.341	31.8664
EGR2	ENSG00000122877.9	RELB	Rel	ENSG00000104856.9	0.00826276	protein_coding	8.90223	122.195	61.4806	protein_coding	2.12493	158.341	31.8664
EGR2	ENSG00000122877.9	NRF1	Unknown	ENSG00000106459.10	0.00971809	protein_coding	12.1101	19.1807	7.90798	protein_coding	2.12493	158.341	31.8664
EGR2	ENSG00000122877.9	NFKB1	Rel	ENSG00000109320.7	0.0091386	protein_coding	29.1567	506.789	296.345	protein_coding	2.12493	158.341	31.8664
EGR2	ENSG00000122877.9	ZNF136	C2H2 ZF	ENSG00000196646.7	0.0102126	protein_coding	7.35826	8.26587	5.50982	protein_coding	2.12493	158.341	31.8664
EGR2	ENSG00000122877.9	NR4A1	Nuclear receptor	ENSG00000123358.15	0.00755087	protein_coding	1.8162	137.343	53.2826	protein_coding	2.12493	158.341	31.8664
EGR2	ENSG00000122877.9	E2F6	E2F	ENSG00000169016.12	0.00743795	protein_coding	2.84755	10.2704	6.21233	protein_coding	2.12493	158.341	31.8664
EGR2	ENSG00000122877.9	MAFG	bZIP	ENSG00000197063.6	0.00713953	protein_coding	5.59852	24.4516	19.1702	protein_coding	2.12493	158.341	31.8664
EGR2	ENSG00000122877.9	ZNF24	C2H2 ZF	ENSG00000172466.11	0.00727	protein_coding	24.04	36.803	22.5491	protein_coding	2.12493	158.341	31.8664
EGR2	ENSG00000122877.9	IKZF1	C2H2 ZF	ENSG00000185811.12	0.00856977	protein_coding	140.55	182.375	130.244	protein_coding	2.12493	158.341	31.8664
EGR2	ENSG00000122877.9	PRDM1	C2H2 ZF	ENSG00000057657.10	0.0109568	protein_coding	1.80343	5.61797	1.2626	protein_coding	2.12493	158.341	31.8664
EGR2	ENSG00000122877.9	ZNF460	C2H2 ZF	ENSG00000197714.4	0.00850884	protein_coding	31.8465	67.1283	30.8887	protein_coding	2.12493	158.341	31.8664
EGR2	ENSG00000122877.9	SP2	C2H2 ZF	ENSG00000167182.11	0.00922849	protein_coding	34.5701	58.9216	43.343	protein_coding	2.12493	158.341	31.8664
EGR2	ENSG00000122877.9	USF2	bHLH	ENSG00000105698.11	0.0123169	protein_coding	40.5727	17.8351	31.9485	protein_coding	2.12493	158.341	31.8664
EGR2	ENSG00000122877.9	CEBPB	bZIP	ENSG00000172216.4	0.00975983	protein_coding	13.8991	21.8187	11.2238	protein_coding	2.12493	158.341	31.8664
EGR2	ENSG00000122877.9	CEBPG	bZIP	ENSG00000153879.4	0.00798901	protein_coding	9.95546	26.2151	15.8662	protein_coding	2.12493	158.341	31.8664
EGR2	ENSG00000122877.9	ZBTB6	C2H2 ZF	ENSG00000186130.4	0.0143677	protein_coding	14.1741	21.0704	12.5025	protein_coding	2.12493	158.341	31.8664
EGR2	ENSG00000122877.9	ELK4	Ets	ENSG00000158711.9	0.00969588	protein_coding	67.4856	107.039	70.1592	protein_coding	2.12493	158.341	31.8664
EGR2	ENSG00000122877.9	TGIF1	Homeodomain	ENSG00000177426.16	0.00850286	protein_coding	11.7375	22.7534	3.25931	protein_coding	2.12493	158.341	31.8664
EGR2	ENSG00000122877.9	KLF9	C2H2 ZF	ENSG00000119138.3	0.0140881	protein_coding	14.7466	42.3805	19.3454	protein_coding	2.12493	158.341	31.8664
EGR2	ENSG00000122877.9	NR4A2	Nuclear receptor	ENSG00000153234.9	0.0106798	protein_coding	3.08795	132.95	51.2972	protein_coding	2.12493	158.341	31.8664
EGR2	ENSG00000122877.9	IRF9	IRF	ENSG00000213928.4	0.0133222	protein_coding	3.67368	6.92631	4.52713	protein_coding	2.12493	158.341	31.8664
EGR2	ENSG00000122877.9	IRF3	IRF	ENSG00000126456.11	0.00706245	protein_coding	26.1248	12.3178	23.4694	protein_coding	2.12493	158.341	31.8664
EGR2	ENSG00000122877.9	STAT5A	STAT	ENSG00000126561.12	0.00802984	protein_coding	36.4983	316.372	118.146	protein_coding	2.12493	158.341	31.8664
EGR2	ENSG00000122877.9	ZNF143	C2H2 ZF	ENSG00000166478.5	0.00766702	protein_coding	13.0232	36.5983	22.2393	protein_coding	2.12493	158.341	31.8664
EGR2	ENSG00000122877.9	NFATC2	Rel	ENSG00000101096.15	0.00743191	protein_coding	33.903	24.7075	33.2928	protein_coding	2.12493	158.341	31.8664
EGR2	ENSG00000122877.9	FOXP1	Forkhead	ENSG00000114861.14	0.00846681	protein_coding	81.9274	148.688	90.0929	protein_coding	2.12493	158.341	31.8664
EGR2	ENSG00000122877.9	ELK3	Ets	ENSG00000111145.3	0.00981625	protein_coding	28.9716	53.2809	27.9617	protein_coding	2.12493	158.341	31.8664
EGR2	ENSG00000122877.9	ETV3	Ets	ENSG00000117036.7	0.00976604	protein_coding	12.9579	18.6252	12.707	protein_coding	2.12493	158.341	31.8664
EGR2	ENSG00000122877.9	ATF7	bZIP,C2H2 ZF	ENSG00000170653.14	0.00811875	protein_coding	12.0374	9.58847	13.0137	protein_coding	2.12493	158.341	31.8664
EGR2	ENSG00000122877.9	ARNT	bHLH	ENSG00000143437.16	0.00989602	protein_coding	23.8486	13.5725	25.4699	protein_coding	2.12493	158.341	31.8664
EGR2	ENSG00000122877.9	PRDM15	NA	ENSG00000141956.9	0.0104548	protein_coding	4.15744	9.23077	6.49964	protein_coding	2.12493	158.341	31.8664
EGR2	ENSG00000122877.9	EGR1	C2H2 ZF	ENSG00000120738.7	0.0100451	protein_coding	2.10936	136.228	76.4968	protein_coding	2.12493	158.341	31.8664
EGR2	ENSG00000122877.9	EGR3	C2H2 ZF	ENSG00000179388.8	0.0126374	protein_coding	1.35095	132.127	45.4685	protein_coding	2.12493	158.341	31.8664
EGR2	ENSG00000122877.9	ZNF140	C2H2 ZF	ENSG00000196387.5	0.0181587	protein_coding	7.55863	11.9829	6.05519	protein_coding	2.12493	158.341	31.8664
EGR2	ENSG00000122877.9	KLF10	C2H2 ZF	ENSG00000155090.10	0.0080965	protein_coding	2.98347	101.32	25.2161	protein_coding	2.12493	158.341	31.8664
MTF1	ENSG00000188786.9	NFYC	Unknown	ENSG00000066136.15	0.00740292	protein_coding	17.5252	24.9995	29.7307	protein_coding	10.1249	31.2324	26.6528
MTF1	ENSG00000188786.9	ERF	Ets	ENSG00000105722.5	0.00942014	protein_coding	16.4224	54.4922	63.5516	protein_coding	10.1249	31.2324	26.6528
MTF1	ENSG00000188786.9	POU2F2	Homeodomain,POU	ENSG00000028277.16	0.00741367	protein_coding	15.7518	74.8209	53.1713	protein_coding	10.1249	31.2324	26.6528
MTF1	ENSG00000188786.9	STAT3	STAT	ENSG00000168610.10	0.00714942	protein_coding	27.8495	92.8121	111.384	protein_coding	10.1249	31.2324	26.6528
MTF1	ENSG00000188786.9	HIC1	C2H2 ZF	ENSG00000177374.8	0.00766956	protein_coding	1.90744	22.6054	41.0085	protein_coding	10.1249	31.2324	26.6528
MTF1	ENSG00000188786.9	RELA	Rel	ENSG00000173039.14	0.0140856	protein_coding	47.6368	71.7005	69.9761	protein_coding	10.1249	31.2324	26.6528
MTF1	ENSG00000188786.9	SNAI1	C2H2 ZF	ENSG00000124216.3	0.00933237	protein_coding	1.30754	8.60721	3.42322	protein_coding	10.1249	31.2324	26.6528
NFKB2	ENSG00000077150.13	NR2C2	Nuclear receptor	ENSG00000177463.11	0.0142193	protein_coding	25.6732	14.2385	18.4864	protein_coding	22.2687	178.43	201.908
NFKB2	ENSG00000077150.13	ARID3B	ARID/BRIGHT	ENSG00000179361.13	0.00743784	protein_coding	10.7108	6.6985	7.73282	protein_coding	22.2687	178.43	201.908
NFKB2	ENSG00000077150.13	ZBTB14	C2H2 ZF	ENSG00000198081.6	0.00890232	protein_coding	22.0902	8.83913	14.8651	protein_coding	22.2687	178.43	201.908
NFKB2	ENSG00000077150.13	RBPJ	CSL	ENSG00000168214.16	0.00788607	protein_coding	15.4007	45.7294	34.203	protein_coding	22.2687	178.43	201.908
NFKB2	ENSG00000077150.13	MYC	bHLH	ENSG00000136997.10	0.0101592	protein_coding	102.767	1095.75	648.817	protein_coding	22.2687	178.43	201.908
NFKB2	ENSG00000077150.13	KLF2	C2H2 ZF	ENSG00000127528.5	0.00754934	protein_coding	643.228	77.5309	3.57086	protein_coding	22.2687	178.43	201.908
NFKB2	ENSG00000077150.13	FLI1	Ets	ENSG00000151702.12	0.00784984	protein_coding	25.0796	8.22835	13.354	protein_coding	22.2687	178.43	201.908
NFKB2	ENSG00000077150.13	NR1D1	Nuclear receptor	ENSG00000126368.5	0.00760843	protein_coding	19.4206	54.1854	31.3215	protein_coding	22.2687	178.43	201.908
NFKB2	ENSG00000077150.13	FOSL1	bZIP	ENSG00000175592.4	0.0078157	protein_coding	1.60479	151.689	60.6658	protein_coding	22.2687	178.43	201.908
NFKB2	ENSG00000077150.13	HINFP	C2H2 ZF	ENSG00000172273.8	0.00781596	protein_coding	8.65374	5.69092	4.99144	protein_coding	22.2687	178.43	201.908
NFKB2	ENSG00000077150.13	NR1D2	Nuclear receptor	ENSG00000174738.8	0.0094618	protein_coding	19.0213	11.2444	3.15062	protein_coding	22.2687	178.43	201.908
NFKB2	ENSG00000077150.13	RORA	Nuclear receptor	ENSG00000069667.11	0.00817408	protein_coding	23.2819	9.22455	1.52915	protein_coding	22.2687	178.43	201.908
NFKB2	ENSG00000077150.13	KLF12	C2H2 ZF	ENSG00000118922.12	0.00735363	protein_coding	53.6377	14.6764	9.57696	protein_coding	22.2687	178.43	201.908
NFKB2	ENSG00000077150.13	NFIX	SMAD	ENSG00000008441.12	0.00788585	protein_coding	4.02934	24.3211	14.9281	protein_coding	22.2687	178.43	201.908
NFKB2	ENSG00000077150.13	STAT1	STAT	ENSG00000115415.14	0.0104841	protein_coding	35.0834	445.774	430.889	protein_coding	22.2687	178.43	201.908
NFKB2	ENSG00000077150.13	PLAG1	C2H2 ZF	ENSG00000181690.3	0.00902059	protein_coding	8.37695	2.21704	1.83645	protein_coding	22.2687	178.43	201.908
NFKB2	ENSG00000077150.13	BATF3	bZIP	ENSG00000123685.4	0.00903527	protein_coding	1.65811	41.5687	22.1585	protein_coding	22.2687	178.43	201.908
NFKB2	ENSG00000077150.13	NFKB1	Rel	ENSG00000109320.7	0.00792965	protein_coding	29.1567	506.789	296.345	protein_coding	22.2687	178.43	201.908
NFKB2	ENSG00000077150.13	ELF2	Ets	ENSG00000109381.15	0.00762249	protein_coding	15.8982	8.39304	7.75401	protein_coding	22.2687	178.43	201.908
NFKB2	ENSG00000077150.13	POU6F1	Homeodomain	ENSG00000184271.11	0.0148574	protein_coding	18.4611	8.11478	4.84338	protein_coding	22.2687	178.43	201.908
NFKB2	ENSG00000077150.13	NFATC3	Rel	ENSG00000072736.14	0.00922771	protein_coding	51.0818	34.6918	37.2125	protein_coding	22.2687	178.43	201.908
MXI1	ENSG00000119950.16	TFE3	bHLH	ENSG00000068323.12	0.0149383	protein_coding	14.5099	17.4215	23.2081	protein_coding	28.7737	21.687	11.6316
MXI1	ENSG00000119950.16	MLXIP	bHLH	ENSG00000175727.9	0.0100357	protein_coding	38.3803	32.1952	21.9588	protein_coding	28.7737	21.687	11.6316
MXI1	ENSG00000119950.16	THAP1	THAP finger	ENSG00000131931.4	0.00975864	protein_coding	10.3161	13.9612	18.6273	protein_coding	28.7737	21.687	11.6316
MXI1	ENSG00000119950.16	SP1	C2H2 ZF	ENSG00000185591.5	0.009439	protein_coding	62.5147	64.2127	75.0785	protein_coding	28.7737	21.687	11.6316
MXI1	ENSG00000119950.16	KLF11	C2H2 ZF	ENSG00000172059.6	0.00858135	protein_coding	3.5389	6.49125	9.48579	protein_coding	28.7737	21.687	11.6316
MXI1	ENSG00000119950.16	STAT1	STAT	ENSG00000115415.14	0.0115313	protein_coding	35.0834	445.774	430.889	protein_coding	28.7737	21.687	11.6316
MXI1	ENSG00000119950.16	HSF1	HSF	ENSG00000185122.6	0.00715165	protein_coding	21.9018	36.086	47.0488	protein_coding	28.7737	21.687	11.6316
MXI1	ENSG00000119950.16	FOXO1	Forkhead	ENSG00000150907.6	0.0118483	protein_coding	94.0816	55.3038	49.5386	protein_coding	28.7737	21.687	11.6316
MXI1	ENSG00000119950.16	VDR	Nuclear receptor	ENSG00000111424.6	0.012479	protein_coding	3.51623	9.31279	32.3455	protein_coding	28.7737	21.687	11.6316
MXI1	ENSG00000119950.16	ZNF282	C2H2 ZF	ENSG00000170265.7	0.0125129	protein_coding	10.0338	13.1235	24.7383	protein_coding	28.7737	21.687	11.6316
MXI1	ENSG00000119950.16	FOXP3	Forkhead	ENSG00000049768.10	0.00955195	protein_coding	2.19489	3.42871	6.75386	protein_coding	28.7737	21.687	11.6316
MXI1	ENSG00000119950.16	JUND	bZIP	ENSG00000130522.4	0.0156646	protein_coding	74.3572	109.809	180.846	protein_coding	28.7737	21.687	11.6316
MXI1	ENSG00000119950.16	ZNF354C	C2H2 ZF	ENSG00000177932.6	0.008159	protein_coding	8.44028	6.87653	5.68326	protein_coding	28.7737	21.687	11.6316
MXI1	ENSG00000119950.16	SMAD4	SMAD	ENSG00000141646.9	0.00714628	protein_coding	13.9346	9.28591	7.65724	protein_coding	28.7737	21.687	11.6316
MXI1	ENSG00000119950.16	TEAD4	TEA	ENSG00000197905.4	0.00923169	protein_coding	2.81377	3.24327	5.54252	protein_coding	28.7737	21.687	11.6316
NFYC	ENSG00000066136.15	SOX4	Sox	ENSG00000124766.4	0.007249	protein_coding	6.87304	3.60192	2.03513	protein_coding	17.5252	24.9995	29.7307
NFYC	ENSG00000066136.15	ZNF740	C2H2 ZF	ENSG00000139651.9	0.00929124	protein_coding	30.1018	20.8814	16.9006	protein_coding	17.5252	24.9995	29.7307
NFYC	ENSG00000066136.15	PBX3	Homeodomain	ENSG00000167081.12	0.0102095	protein_coding	9.21206	5.42354	5.54844	protein_coding	17.5252	24.9995	29.7307
FOXJ3	ENSG00000198815.4	ZFX	C2H2 ZF	ENSG00000005889.11	0.00799032	protein_coding	19.9518	25.546	15.9478	protein_coding	35.5573	47.1979	34.4884
FOXJ3	ENSG00000198815.4	TBX21	T-box	ENSG00000073861.2	0.00795781	protein_coding	2.92139	115.541	116.88	protein_coding	35.5573	47.1979	34.4884
FOXJ3	ENSG00000198815.4	BATF	bZIP	ENSG00000156127.6	0.0097941	protein_coding	5.33826	97.4656	88.5682	protein_coding	35.5573	47.1979	34.4884
FOXJ3	ENSG00000198815.4	MAFK	bZIP	ENSG00000198517.5	0.00845609	protein_coding	7.86877	20.1437	11.0981	protein_coding	35.5573	47.1979	34.4884
FOXJ3	ENSG00000198815.4	NFE2L2	bZIP	ENSG00000116044.11	0.00814947	protein_coding	43.1876	100.955	67.5731	protein_coding	35.5573	47.1979	34.4884
FOXJ3	ENSG00000198815.4	BATF3	bZIP	ENSG00000123685.4	0.00801369	protein_coding	1.65811	41.5687	22.1585	protein_coding	35.5573	47.1979	34.4884
FOXJ3	ENSG00000198815.4	TCF12	bHLH	ENSG00000140262.13	0.00773789	protein_coding	17.2377	15.075	18.308	protein_coding	35.5573	47.1979	34.4884
FOXJ3	ENSG00000198815.4	HIF1A	bHLH	ENSG00000100644.12	0.00876379	protein_coding	37.8509	193.534	125.593	protein_coding	35.5573	47.1979	34.4884
FOXJ3	ENSG00000198815.4	CREM	bZIP	ENSG00000095794.15	0.00756368	protein_coding	4.18751	35.9715	27.9649	protein_coding	35.5573	47.1979	34.4884
FOXJ3	ENSG00000198815.4	NFYA	CBF/NF-Y	ENSG00000001167.10	0.00754677	protein_coding	22.9157	43.4457	28.5316	protein_coding	35.5573	47.1979	34.4884
FOXJ3	ENSG00000198815.4	NFIX	SMAD	ENSG00000008441.12	0.00762025	protein_coding	4.02934	24.3211	14.9281	protein_coding	35.5573	47.1979	34.4884
FOXJ3	ENSG00000198815.4	GABPA	Ets	ENSG00000154727.6	0.0123281	protein_coding	10.4451	16.6224	11.9009	protein_coding	35.5573	47.1979	34.4884
FOXJ3	ENSG00000198815.4	STAT5A	STAT	ENSG00000126561.12	0.00769289	protein_coding	36.4983	316.372	118.146	protein_coding	35.5573	47.1979	34.4884
FOXJ3	ENSG00000198815.4	ZNF317	C2H2 ZF	ENSG00000130803.10	0.00841165	protein_coding	15.4262	29.4555	27.1963	protein_coding	35.5573	47.1979	34.4884
FOXJ3	ENSG00000198815.4	PRDM15	NA	ENSG00000141956.9	0.00937218	protein_coding	4.15744	9.23077	6.49964	protein_coding	35.5573	47.1979	34.4884
FOXJ3	ENSG00000198815.4	ZNF24	C2H2 ZF	ENSG00000172466.11	0.00854491	protein_coding	24.04	36.803	22.5491	protein_coding	35.5573	47.1979	34.4884
FOXJ3	ENSG00000198815.4	ZNF143	C2H2 ZF	ENSG00000166478.5	0.00886121	protein_coding	13.0232	36.5983	22.2393	protein_coding	35.5573	47.1979	34.4884
IRF7	ENSG00000185507.15	ZNF148	NA	ENSG00000163848.14	0.0106739	protein_coding	16.9975	14.7542	13.1656	protein_coding	18.8744	15.4072	9.72413
IRF7	ENSG00000185507.15	RUNX2	Runt	ENSG00000124813.16	0.00868106	protein_coding	6.0333	2.90249	1.44631	protein_coding	18.8744	15.4072	9.72413
IRF7	ENSG00000185507.15	ZEB1	C2H2 ZF,Homeodomain	ENSG00000148516.17	0.016149	protein_coding	30.5601	27.0703	15.1315	protein_coding	18.8744	15.4072	9.72413
IRF7	ENSG00000185507.15	CENPB	CENPB	ENSG00000125817.7	0.00720037	protein_coding	34.4666	56.3655	92.0614	protein_coding	18.8744	15.4072	9.72413
IRF7	ENSG00000185507.15	ZBTB33	C2H2 ZF	ENSG00000177485.6	0.0160548	protein_coding	22.5466	20.7775	19.1706	protein_coding	18.8744	15.4072	9.72413
IRF7	ENSG00000185507.15	STAT2	STAT	ENSG00000170581.9	0.0092515	protein_coding	37.0243	34.4988	24.7853	protein_coding	18.8744	15.4072	9.72413
IRF7	ENSG00000185507.15	NR3C1	Nuclear receptor	ENSG00000113580.10	0.00759804	protein_coding	34.8792	35.9849	17.06	protein_coding	18.8744	15.4072	9.72413
IRF7	ENSG00000185507.15	ZBTB26	C2H2 ZF	ENSG00000171448.8	0.0113726	protein_coding	7.63083	7.51462	5.22584	protein_coding	18.8744	15.4072	9.72413
IRF7	ENSG00000185507.15	NFIC	SMAD	ENSG00000141905.13	0.0187233	protein_coding	14.4289	14.8113	25.0569	protein_coding	18.8744	15.4072	9.72413
FOXJ3	ENSG00000198815.4	MAFG	bZIP	ENSG00000197063.6	0.00789488	protein_coding	5.59852	24.4516	19.1702	protein_coding	35.5573	47.1979	34.4884
FOXJ3	ENSG00000198815.4	MAFF	bZIP	ENSG00000185022.7	0.0102658	protein_coding	4.04945	8.48979	4.91597	protein_coding	35.5573	47.1979	34.4884
FOXJ3	ENSG00000198815.4	KLF13	C2H2 ZF	ENSG00000169926.5	0.00788676	protein_coding	74.148	22.3999	42.3073	protein_coding	35.5573	47.1979	34.4884
FOXJ3	ENSG00000198815.4	ELK4	Ets	ENSG00000158711.9	0.00810218	protein_coding	67.4856	107.039	70.1592	protein_coding	35.5573	47.1979	34.4884
FOXJ3	ENSG00000198815.4	RUNX1	Runt	ENSG00000159216.14	0.00710977	protein_coding	21.5738	25.8568	16.771	protein_coding	35.5573	47.1979	34.4884
FOXJ3	ENSG00000198815.4	PKNOX1	Homeodomain	ENSG00000160199.10	0.0070165	protein_coding	6.08803	12.0409	6.80785	protein_coding	35.5573	47.1979	34.4884
ZNF143	ENSG00000166478.5	ZBTB14	C2H2 ZF	ENSG00000198081.6	0.00798176	protein_coding	22.0902	8.83913	14.8651	protein_coding	13.0232	36.5983	22.2393
ZNF143	ENSG00000166478.5	E2F6	E2F	ENSG00000169016.12	0.00815624	protein_coding	2.84755	10.2704	6.21233	protein_coding	13.0232	36.5983	22.2393
ZNF143	ENSG00000166478.5	SP4	C2H2 ZF	ENSG00000105866.9	0.00746919	protein_coding	25.1884	15.9254	18.3065	protein_coding	13.0232	36.5983	22.2393
ZNF143	ENSG00000166478.5	KLF9	C2H2 ZF	ENSG00000119138.3	0.00975793	protein_coding	14.7466	42.3805	19.3454	protein_coding	13.0232	36.5983	22.2393
ZNF143	ENSG00000166478.5	SP2	C2H2 ZF	ENSG00000167182.11	0.0104662	protein_coding	34.5701	58.9216	43.343	protein_coding	13.0232	36.5983	22.2393
ZNF143	ENSG00000166478.5	ZFX	C2H2 ZF	ENSG00000005889.11	0.00831156	protein_coding	19.9518	25.546	15.9478	protein_coding	13.0232	36.5983	22.2393
ZNF143	ENSG00000166478.5	ELK4	Ets	ENSG00000158711.9	0.00713085	protein_coding	67.4856	107.039	70.1592	protein_coding	13.0232	36.5983	22.2393
ZNF143	ENSG00000166478.5	RELB	Rel	ENSG00000104856.9	0.00906564	protein_coding	8.90223	122.195	61.4806	protein_coding	13.0232	36.5983	22.2393
ZNF143	ENSG00000166478.5	REL	Rel	ENSG00000162924.9	0.00776316	protein_coding	8.38764	216.888	56.7033	protein_coding	13.0232	36.5983	22.2393
ZNF143	ENSG00000166478.5	CREM	bZIP	ENSG00000095794.15	0.0126788	protein_coding	4.18751	35.9715	27.9649	protein_coding	13.0232	36.5983	22.2393
ZNF143	ENSG00000166478.5	KLF6	C2H2 ZF	ENSG00000067082.10	0.0091443	protein_coding	20.002	29.0863	17.9519	protein_coding	13.0232	36.5983	22.2393
ZNF143	ENSG00000166478.5	PPARA	Nuclear receptor	ENSG00000186951.12	0.0090722	protein_coding	5.8692	2.70244	4.58454	protein_coding	13.0232	36.5983	22.2393
ZNF143	ENSG00000166478.5	GABPA	Ets	ENSG00000154727.6	0.0128388	protein_coding	10.4451	16.6224	11.9009	protein_coding	13.0232	36.5983	22.2393
ZNF143	ENSG00000166478.5	STAT5B	STAT	ENSG00000173757.5	0.00779954	protein_coding	79.7973	88.8999	50.9057	protein_coding	13.0232	36.5983	22.2393
ZNF143	ENSG00000166478.5	STAT5A	STAT	ENSG00000126561.12	0.00928775	protein_coding	36.4983	316.372	118.146	protein_coding	13.0232	36.5983	22.2393
ZNF143	ENSG00000166478.5	FOXK1	Forkhead	ENSG00000164916.9	0.00771005	protein_coding	29.2615	39.2605	34.7856	protein_coding	13.0232	36.5983	22.2393
ZNF143	ENSG00000166478.5	FOXK2	Forkhead	ENSG00000141568.15	0.00749475	protein_coding	14.4827	45.2678	41.1481	protein_coding	13.0232	36.5983	22.2393
ZNF143	ENSG00000166478.5	STAT6	STAT	ENSG00000166888.6	0.00758699	protein_coding	68.1825	167.043	162.319	protein_coding	13.0232	36.5983	22.2393
ZNF143	ENSG00000166478.5	FOXP1	Forkhead	ENSG00000114861.14	0.00725729	protein_coding	81.9274	148.688	90.0929	protein_coding	13.0232	36.5983	22.2393
ZNF143	ENSG00000166478.5	PBX2	Homeodomain	ENSG00000204304.7	0.00898262	protein_coding	31.7444	13.5005	19.866	protein_coding	13.0232	36.5983	22.2393
ZNF143	ENSG00000166478.5	JUNB	bZIP	ENSG00000171223.4	0.00750144	protein_coding	58.3256	189.229	176.615	protein_coding	13.0232	36.5983	22.2393
ZNF143	ENSG00000166478.5	FOSL2	bZIP	ENSG00000075426.7	0.0113047	protein_coding	2.97949	68.8857	12.7455	protein_coding	13.0232	36.5983	22.2393
ZNF143	ENSG00000166478.5	BATF	bZIP	ENSG00000156127.6	0.00757922	protein_coding	5.33826	97.4656	88.5682	protein_coding	13.0232	36.5983	22.2393
ZNF143	ENSG00000166478.5	RARG	Nuclear receptor	ENSG00000172819.12	0.00962213	protein_coding	16.4433	7.00141	13.5178	protein_coding	13.0232	36.5983	22.2393
ZNF143	ENSG00000166478.5	SREBF1	bHLH	ENSG00000072310.12	0.00808419	protein_coding	8.34454	20.2325	30.2781	protein_coding	13.0232	36.5983	22.2393
ZNF143	ENSG00000166478.5	CEBPG	bZIP	ENSG00000153879.4	0.00796997	protein_coding	9.95546	26.2151	15.8662	protein_coding	13.0232	36.5983	22.2393
ZNF143	ENSG00000166478.5	POU2F2	Homeodomain,POU	ENSG00000028277.16	0.0078149	protein_coding	15.7518	74.8209	53.1713	protein_coding	13.0232	36.5983	22.2393
ZNF143	ENSG00000166478.5	NFATC2	Rel	ENSG00000101096.15	0.00787222	protein_coding	33.903	24.7075	33.2928	protein_coding	13.0232	36.5983	22.2393
ZNF143	ENSG00000166478.5	MGA	bHLH,T-box	ENSG00000174197.12	0.0107202	protein_coding	21.4715	52.8379	27.0435	protein_coding	13.0232	36.5983	22.2393
ZNF143	ENSG00000166478.5	IRF4	IRF	ENSG00000137265.10	0.00935621	protein_coding	5.6988	783.89	464.786	protein_coding	13.0232	36.5983	22.2393
ZNF143	ENSG00000166478.5	NFIL3	bZIP	ENSG00000165030.3	0.0092871	protein_coding	2.9022	11.3432	3.81128	protein_coding	13.0232	36.5983	22.2393
ZNF143	ENSG00000166478.5	STAT4	STAT	ENSG00000138378.13	0.00817045	protein_coding	36.264	65.4242	65.4886	protein_coding	13.0232	36.5983	22.2393
ZNF143	ENSG00000166478.5	MYC	bHLH	ENSG00000136997.10	0.00877578	protein_coding	102.767	1095.75	648.817	protein_coding	13.0232	36.5983	22.2393
ZNF143	ENSG00000166478.5	NFKB1	Rel	ENSG00000109320.7	0.0107639	protein_coding	29.1567	506.789	296.345	protein_coding	13.0232	36.5983	22.2393
ARNTL	ENSG00000133794.13	FOXO4	Forkhead	ENSG00000184481.12	0.00755865	protein_coding	16.4678	5.06429	4.3744	protein_coding	14.2686	5.78231	4.69964
ARNTL	ENSG00000133794.13	TCF3	bHLH	ENSG00000071564.10	0.00745174	protein_coding	18.7774	32.7741	47.0143	protein_coding	14.2686	5.78231	4.69964
ARNTL	ENSG00000133794.13	SMAD4	SMAD	ENSG00000141646.9	0.00953809	protein_coding	13.9346	9.28591	7.65724	protein_coding	14.2686	5.78231	4.69964
ARNTL	ENSG00000133794.13	ETS1	Ets	ENSG00000134954.10	0.00710362	protein_coding	452.612	162.87	218.837	protein_coding	14.2686	5.78231	4.69964
ARNTL	ENSG00000133794.13	RFX3	RFX	ENSG00000080298.11	0.00772893	protein_coding	8.42273	4.67247	4.49608	protein_coding	14.2686	5.78231	4.69964
ARNTL	ENSG00000133794.13	NR1D2	Nuclear receptor	ENSG00000174738.8	0.00922609	protein_coding	19.0213	11.2444	3.15062	protein_coding	14.2686	5.78231	4.69964
ARNTL	ENSG00000133794.13	NR2C1	Nuclear receptor	ENSG00000120798.12	0.0107279	protein_coding	11.3642	5.96711	5.43842	protein_coding	14.2686	5.78231	4.69964
ARNTL	ENSG00000133794.13	RORA	Nuclear receptor	ENSG00000069667.11	0.00871491	protein_coding	23.2819	9.22455	1.52915	protein_coding	14.2686	5.78231	4.69964
ARNTL	ENSG00000133794.13	ZNF740	C2H2 ZF	ENSG00000139651.9	0.0119042	protein_coding	30.1018	20.8814	16.9006	protein_coding	14.2686	5.78231	4.69964
ESRRA	ENSG00000173153.9	BCL6	C2H2 ZF	ENSG00000113916.13	0.00841656	protein_coding	4.17339	18.1066	5.56979	protein_coding	8.26157	35.9147	35.2063
ESRRA	ENSG00000173153.9	NFATC1	Rel	ENSG00000131196.13	0.00747335	protein_coding	26.5075	58.5079	62.1764	protein_coding	8.26157	35.9147	35.2063
ESRRA	ENSG00000173153.9	ELF2	Ets	ENSG00000109381.15	0.00726531	protein_coding	15.8982	8.39304	7.75401	protein_coding	8.26157	35.9147	35.2063
ESRRA	ENSG00000173153.9	ETS1	Ets	ENSG00000134954.10	0.00837842	protein_coding	452.612	162.87	218.837	protein_coding	8.26157	35.9147	35.2063
ESRRA	ENSG00000173153.9	ELK1	Ets	ENSG00000126767.13	0.00811742	protein_coding	18.6585	40.6808	59.8587	protein_coding	8.26157	35.9147	35.2063
ESRRA	ENSG00000173153.9	ZBTB18	C2H2 ZF	ENSG00000179456.9	0.00735738	protein_coding	104.724	28.3132	11.2869	protein_coding	8.26157	35.9147	35.2063
ESRRA	ENSG00000173153.9	RFX5	RFX	ENSG00000143390.13	0.00731696	protein_coding	17.8656	28.0286	32.1963	protein_coding	8.26157	35.9147	35.2063
ESRRA	ENSG00000173153.9	ZNF143	C2H2 ZF	ENSG00000166478.5	0.0095626	protein_coding	13.0232	36.5983	22.2393	protein_coding	8.26157	35.9147	35.2063
ESRRA	ENSG00000173153.9	BATF3	bZIP	ENSG00000123685.4	0.00737522	protein_coding	1.65811	41.5687	22.1585	protein_coding	8.26157	35.9147	35.2063
RELA	ENSG00000173039.14	KLF16	C2H2 ZF	ENSG00000129911.4	0.0102683	protein_coding	11.7561	43.2471	45.3241	protein_coding	47.6368	71.7005	69.9761
RELA	ENSG00000173039.14	KLF12	C2H2 ZF	ENSG00000118922.12	0.00809913	protein_coding	53.6377	14.6764	9.57696	protein_coding	47.6368	71.7005	69.9761
RELA	ENSG00000173039.14	ETS2	Ets	ENSG00000157557.7	0.00900229	protein_coding	7.37297	30.5099	26.3494	protein_coding	47.6368	71.7005	69.9761
RELA	ENSG00000173039.14	ETS1	Ets	ENSG00000134954.10	0.00836472	protein_coding	452.612	162.87	218.837	protein_coding	47.6368	71.7005	69.9761
RELA	ENSG00000173039.14	ATF1	bZIP	ENSG00000123268.4	0.00708894	protein_coding	14.2756	30.5257	29.5574	protein_coding	47.6368	71.7005	69.9761
RELA	ENSG00000173039.14	EGR2	C2H2 ZF	ENSG00000122877.9	0.00939156	protein_coding	2.12493	158.341	31.8664	protein_coding	47.6368	71.7005	69.9761
RELA	ENSG00000173039.14	ESRRA	Nuclear receptor	ENSG00000173153.9	0.00816789	protein_coding	8.26157	35.9147	35.2063	protein_coding	47.6368	71.7005	69.9761
RELA	ENSG00000173039.14	MGA	bHLH,T-box	ENSG00000174197.12	0.00704319	protein_coding	21.4715	52.8379	27.0435	protein_coding	47.6368	71.7005	69.9761
RELA	ENSG00000173039.14	RELB	Rel	ENSG00000104856.9	0.00847554	protein_coding	8.90223	122.195	61.4806	protein_coding	47.6368	71.7005	69.9761
RELA	ENSG00000173039.14	REL	Rel	ENSG00000162924.9	0.00745671	protein_coding	8.38764	216.888	56.7033	protein_coding	47.6368	71.7005	69.9761
FOSL1	ENSG00000175592.4	ATF3	bZIP	ENSG00000162772.12	0.00781441	protein_coding	1.83901	12.5986	5.37156	protein_coding	1.60479	151.689	60.6658
FOSL1	ENSG00000175592.4	RARG	Nuclear receptor	ENSG00000172819.12	0.00965669	protein_coding	16.4433	7.00141	13.5178	protein_coding	1.60479	151.689	60.6658
FOSL1	ENSG00000175592.4	IRF8	IRF	ENSG00000140968.6	0.00730696	protein_coding	2.7126	143.835	108.547	protein_coding	1.60479	151.689	60.6658
FOSL1	ENSG00000175592.4	ETS1	Ets	ENSG00000134954.10	0.00732524	protein_coding	452.612	162.87	218.837	protein_coding	1.60479	151.689	60.6658
FOSL1	ENSG00000175592.4	ELF4	Ets	ENSG00000102034.12	0.00807521	protein_coding	26.4618	20.1657	33.0515	protein_coding	1.60479	151.689	60.6658
FOSL1	ENSG00000175592.4	NR2C2	Nuclear receptor	ENSG00000177463.11	0.00768303	protein_coding	25.6732	14.2385	18.4864	protein_coding	1.60479	151.689	60.6658
FOSL1	ENSG00000175592.4	KLF13	C2H2 ZF	ENSG00000169926.5	0.00904323	protein_coding	74.148	22.3999	42.3073	protein_coding	1.60479	151.689	60.6658
FOSL1	ENSG00000175592.4	ARNTL	bHLH	ENSG00000133794.13	0.00929238	protein_coding	14.2686	5.78231	4.69964	protein_coding	1.60479	151.689	60.6658
FOSL1	ENSG00000175592.4	USF2	bHLH	ENSG00000105698.11	0.00856252	protein_coding	40.5727	17.8351	31.9485	protein_coding	1.60479	151.689	60.6658
RELA	ENSG00000173039.14	ZNF75D	C2H2 ZF	ENSG00000186376.10	0.00753812	protein_coding	8.38859	2.948	2.23164	protein_coding	47.6368	71.7005	69.9761
FOSL1	ENSG00000175592.4	PBX3	Homeodomain	ENSG00000167081.12	0.00715862	protein_coding	9.21206	5.42354	5.54844	protein_coding	1.60479	151.689	60.6658
RELA	ENSG00000173039.14	BATF3	bZIP	ENSG00000123685.4	0.00710112	protein_coding	1.65811	41.5687	22.1585	protein_coding	47.6368	71.7005	69.9761
RELA	ENSG00000173039.14	HIC1	C2H2 ZF	ENSG00000177374.8	0.00793547	protein_coding	1.90744	22.6054	41.0085	protein_coding	47.6368	71.7005	69.9761
RELA	ENSG00000173039.14	FOXO3	Forkhead	ENSG00000118689.10	0.00850897	protein_coding	9.87318	6.89084	3.15724	protein_coding	47.6368	71.7005	69.9761
FOSL1	ENSG00000175592.4	TCFL5	bHLH	ENSG00000101190.8	0.0112792	protein_coding	7.68045	6.17238	7.05429	protein_coding	1.60479	151.689	60.6658
FOSL1	ENSG00000175592.4	IRF3	IRF	ENSG00000126456.11	0.00999112	protein_coding	26.1248	12.3178	23.4694	protein_coding	1.60479	151.689	60.6658
RELA	ENSG00000173039.14	IRF4	IRF	ENSG00000137265.10	0.00914459	protein_coding	5.6988	783.89	464.786	protein_coding	47.6368	71.7005	69.9761
RELA	ENSG00000173039.14	IRF1	IRF	ENSG00000125347.9	0.00827236	protein_coding	20.5275	150.134	102.101	protein_coding	47.6368	71.7005	69.9761
RELA	ENSG00000173039.14	ZNF384	C2H2 ZF	ENSG00000126746.13	0.0119928	protein_coding	26.7544	40.1547	40.9261	protein_coding	47.6368	71.7005	69.9761
FOSL1	ENSG00000175592.4	NR2C1	Nuclear receptor	ENSG00000120798.12	0.0100488	protein_coding	11.3642	5.96711	5.43842	protein_coding	1.60479	151.689	60.6658
HINFP	ENSG00000172273.8	ATF1	bZIP	ENSG00000123268.4	0.00945593	protein_coding	14.2756	30.5257	29.5574	protein_coding	8.65374	5.69092	4.99144
HINFP	ENSG00000172273.8	TCF3	bHLH	ENSG00000071564.10	0.0128985	protein_coding	18.7774	32.7741	47.0143	protein_coding	8.65374	5.69092	4.99144
HINFP	ENSG00000172273.8	TFDP1	E2F	ENSG00000198176.8	0.00719625	protein_coding	10.5546	23.5774	99.2647	protein_coding	8.65374	5.69092	4.99144
HINFP	ENSG00000172273.8	ZNF384	C2H2 ZF	ENSG00000126746.13	0.00977756	protein_coding	26.7544	40.1547	40.9261	protein_coding	8.65374	5.69092	4.99144
HINFP	ENSG00000172273.8	ETS1	Ets	ENSG00000134954.10	0.00870726	protein_coding	452.612	162.87	218.837	protein_coding	8.65374	5.69092	4.99144
HINFP	ENSG00000172273.8	ELK1	Ets	ENSG00000126767.13	0.00969503	protein_coding	18.6585	40.6808	59.8587	protein_coding	8.65374	5.69092	4.99144
HINFP	ENSG00000172273.8	ETS2	Ets	ENSG00000157557.7	0.00805164	protein_coding	7.37297	30.5099	26.3494	protein_coding	8.65374	5.69092	4.99144
HINFP	ENSG00000172273.8	TCF7	Sox	ENSG00000081059.15	0.00780604	protein_coding	224.006	63.0622	58.9134	protein_coding	8.65374	5.69092	4.99144
HINFP	ENSG00000172273.8	ZNF449	C2H2 ZF	ENSG00000173275.8	0.00878469	protein_coding	5.83095	1.93546	1.12909	protein_coding	8.65374	5.69092	4.99144
HINFP	ENSG00000172273.8	SRF	MADS box	ENSG00000112658.6	0.00736968	protein_coding	15.4137	64.2775	80.8318	protein_coding	8.65374	5.69092	4.99144
HINFP	ENSG00000172273.8	RELA	Rel	ENSG00000173039.14	0.00838575	protein_coding	47.6368	71.7005	69.9761	protein_coding	8.65374	5.69092	4.99144
HINFP	ENSG00000172273.8	HSF2	HSF	ENSG00000025156.8	0.0074186	protein_coding	20.2022	22.7886	23.1956	protein_coding	8.65374	5.69092	4.99144
HINFP	ENSG00000172273.8	MLX	bHLH	ENSG00000108788.7	0.00747435	protein_coding	19.8728	32.4765	59.2937	protein_coding	8.65374	5.69092	4.99144
JUN	ENSG00000177606.5	ZNF281	C2H2 ZF	ENSG00000162702.7	0.00808806	protein_coding	19.3751	26.911	17.9295	protein_coding	7.94923	14.3257	6.56083
JUN	ENSG00000177606.5	ELK3	Ets	ENSG00000111145.3	0.010418	protein_coding	28.9716	53.2809	27.9617	protein_coding	7.94923	14.3257	6.56083
JUN	ENSG00000177606.5	ZBTB6	C2H2 ZF	ENSG00000186130.4	0.0128734	protein_coding	14.1741	21.0704	12.5025	protein_coding	7.94923	14.3257	6.56083
JUN	ENSG00000177606.5	NFIC	SMAD	ENSG00000141905.13	0.00972836	protein_coding	14.4289	14.8113	25.0569	protein_coding	7.94923	14.3257	6.56083
JUN	ENSG00000177606.5	ZBTB26	C2H2 ZF	ENSG00000171448.8	0.00804861	protein_coding	7.63083	7.51462	5.22584	protein_coding	7.94923	14.3257	6.56083
JUN	ENSG00000177606.5	ZKSCAN1	C2H2 ZF	ENSG00000106261.12	0.0103018	protein_coding	29.63	31.1672	19.9696	protein_coding	7.94923	14.3257	6.56083
JUN	ENSG00000177606.5	ZNF140	C2H2 ZF	ENSG00000196387.5	0.00701211	protein_coding	7.55863	11.9829	6.05519	protein_coding	7.94923	14.3257	6.56083
JUN	ENSG00000177606.5	RUNX1	Runt	ENSG00000159216.14	0.00739509	protein_coding	21.5738	25.8568	16.771	protein_coding	7.94923	14.3257	6.56083
JUN	ENSG00000177606.5	RREB1	C2H2 ZF	ENSG00000124782.15	0.00850208	protein_coding	16.4582	21.8455	9.185	protein_coding	7.94923	14.3257	6.56083
FLI1	ENSG00000151702.12	BATF3	bZIP	ENSG00000123685.4	0.00743876	protein_coding	1.65811	41.5687	22.1585	protein_coding	25.0796	8.22835	13.354
FLI1	ENSG00000151702.12	ZNF449	C2H2 ZF	ENSG00000173275.8	0.00878764	protein_coding	5.83095	1.93546	1.12909	protein_coding	25.0796	8.22835	13.354
FLI1	ENSG00000151702.12	KLF3	C2H2 ZF	ENSG00000109787.8	0.0072804	protein_coding	125.276	30.3117	18.848	protein_coding	25.0796	8.22835	13.354
ETS1	ENSG00000134954.10	NFE2L1	bZIP	ENSG00000082641.11	0.00753939	protein_coding	20.3803	36.5648	41.2383	protein_coding	452.612	162.87	218.837
ETS1	ENSG00000134954.10	CEBPG	bZIP	ENSG00000153879.4	0.0103016	protein_coding	9.95546	26.2151	15.8662	protein_coding	452.612	162.87	218.837
FLI1	ENSG00000151702.12	ZNF317	C2H2 ZF	ENSG00000130803.10	0.00740448	protein_coding	15.4262	29.4555	27.1963	protein_coding	25.0796	8.22835	13.354
FLI1	ENSG00000151702.12	ATF3	bZIP	ENSG00000162772.12	0.00706464	protein_coding	1.83901	12.5986	5.37156	protein_coding	25.0796	8.22835	13.354
FLI1	ENSG00000151702.12	STAT1	STAT	ENSG00000115415.14	0.00727401	protein_coding	35.0834	445.774	430.889	protein_coding	25.0796	8.22835	13.354
ETS1	ENSG00000134954.10	NR2F6	Nuclear receptor	ENSG00000160113.5	0.00976675	protein_coding	2.22949	6.45054	10.1467	protein_coding	452.612	162.87	218.837
FLI1	ENSG00000151702.12	TBX21	T-box	ENSG00000073861.2	0.0081615	protein_coding	2.92139	115.541	116.88	protein_coding	25.0796	8.22835	13.354
FLI1	ENSG00000151702.12	NR2F6	Nuclear receptor	ENSG00000160113.5	0.00843143	protein_coding	2.22949	6.45054	10.1467	protein_coding	25.0796	8.22835	13.354
FLI1	ENSG00000151702.12	PPARD	Nuclear receptor	ENSG00000112033.9	0.00725526	protein_coding	32.9083	14.8801	18.8092	protein_coding	25.0796	8.22835	13.354
FLI1	ENSG00000151702.12	NFAT5	Rel	ENSG00000102908.16	0.00787104	protein_coding	13.1549	54.2287	31.9488	protein_coding	25.0796	8.22835	13.354
FLI1	ENSG00000151702.12	MAFG	bZIP	ENSG00000197063.6	0.00735311	protein_coding	5.59852	24.4516	19.1702	protein_coding	25.0796	8.22835	13.354
FLI1	ENSG00000151702.12	TCF7	Sox	ENSG00000081059.15	0.0093649	protein_coding	224.006	63.0622	58.9134	protein_coding	25.0796	8.22835	13.354
FLI1	ENSG00000151702.12	LEF1	Sox	ENSG00000138795.5	0.0118788	protein_coding	364.591	202.089	280.925	protein_coding	25.0796	8.22835	13.354
FLI1	ENSG00000151702.12	ZNF75D	C2H2 ZF	ENSG00000186376.10	0.00727035	protein_coding	8.38859	2.948	2.23164	protein_coding	25.0796	8.22835	13.354
FLI1	ENSG00000151702.12	NR2C2	Nuclear receptor	ENSG00000177463.11	0.00825121	protein_coding	25.6732	14.2385	18.4864	protein_coding	25.0796	8.22835	13.354
FLI1	ENSG00000151702.12	ARNTL	bHLH	ENSG00000133794.13	0.00789526	protein_coding	14.2686	5.78231	4.69964	protein_coding	25.0796	8.22835	13.354
FLI1	ENSG00000151702.12	RORA	Nuclear receptor	ENSG00000069667.11	0.00726406	protein_coding	23.2819	9.22455	1.52915	protein_coding	25.0796	8.22835	13.354
FLI1	ENSG00000151702.12	KLF10	C2H2 ZF	ENSG00000155090.10	0.00738299	protein_coding	2.98347	101.32	25.2161	protein_coding	25.0796	8.22835	13.354
FLI1	ENSG00000151702.12	RFX3	RFX	ENSG00000080298.11	0.0075288	protein_coding	8.42273	4.67247	4.49608	protein_coding	25.0796	8.22835	13.354
FLI1	ENSG00000151702.12	FOXO4	Forkhead	ENSG00000184481.12	0.00878831	protein_coding	16.4678	5.06429	4.3744	protein_coding	25.0796	8.22835	13.354
FLI1	ENSG00000151702.12	NFATC3	Rel	ENSG00000072736.14	0.00924537	protein_coding	51.0818	34.6918	37.2125	protein_coding	25.0796	8.22835	13.354
FLI1	ENSG00000151702.12	KLF13	C2H2 ZF	ENSG00000169926.5	0.0123462	protein_coding	74.148	22.3999	42.3073	protein_coding	25.0796	8.22835	13.354
FLI1	ENSG00000151702.12	PBX3	Homeodomain	ENSG00000167081.12	0.0111716	protein_coding	9.21206	5.42354	5.54844	protein_coding	25.0796	8.22835	13.354
ETS1	ENSG00000134954.10	HIC1	C2H2 ZF	ENSG00000177374.8	0.00755823	protein_coding	1.90744	22.6054	41.0085	protein_coding	452.612	162.87	218.837
ETS1	ENSG00000134954.10	SNAI3	C2H2 ZF	ENSG00000185669.5	0.00702034	protein_coding	7.15207	2.50655	4.45566	protein_coding	452.612	162.87	218.837
FLI1	ENSG00000151702.12	SNAI1	C2H2 ZF	ENSG00000124216.3	0.0110909	protein_coding	1.30754	8.60721	3.42322	protein_coding	25.0796	8.22835	13.354
FLI1	ENSG00000151702.12	SNAI3	C2H2 ZF	ENSG00000185669.5	0.00828276	protein_coding	7.15207	2.50655	4.45566	protein_coding	25.0796	8.22835	13.354
ETS1	ENSG00000134954.10	PRDM15	NA	ENSG00000141956.9	0.00928398	protein_coding	4.15744	9.23077	6.49964	protein_coding	452.612	162.87	218.837
ETS1	ENSG00000134954.10	ETS2	Ets	ENSG00000157557.7	0.0107333	protein_coding	7.37297	30.5099	26.3494	protein_coding	452.612	162.87	218.837
ETS1	ENSG00000134954.10	TCF7	Sox	ENSG00000081059.15	0.00953078	protein_coding	224.006	63.0622	58.9134	protein_coding	452.612	162.87	218.837
ETS1	ENSG00000134954.10	MAZ	C2H2 ZF	ENSG00000103495.9	0.008652	protein_coding	71.6034	91.0371	189.127	protein_coding	452.612	162.87	218.837
ETS1	ENSG00000134954.10	BATF3	bZIP	ENSG00000123685.4	0.00770142	protein_coding	1.65811	41.5687	22.1585	protein_coding	452.612	162.87	218.837
ETS1	ENSG00000134954.10	NR2C2	Nuclear receptor	ENSG00000177463.11	0.00947201	protein_coding	25.6732	14.2385	18.4864	protein_coding	452.612	162.87	218.837
ETS1	ENSG00000134954.10	RELB	Rel	ENSG00000104856.9	0.00809231	protein_coding	8.90223	122.195	61.4806	protein_coding	452.612	162.87	218.837
FLI1	ENSG00000151702.12	RELB	Rel	ENSG00000104856.9	0.0072875	protein_coding	8.90223	122.195	61.4806	protein_coding	25.0796	8.22835	13.354
ETS1	ENSG00000134954.10	KLF9	C2H2 ZF	ENSG00000119138.3	0.00704776	protein_coding	14.7466	42.3805	19.3454	protein_coding	452.612	162.87	218.837
ETS1	ENSG00000134954.10	E2F6	E2F	ENSG00000169016.12	0.0127664	protein_coding	2.84755	10.2704	6.21233	protein_coding	452.612	162.87	218.837
ETS1	ENSG00000134954.10	KLF13	C2H2 ZF	ENSG00000169926.5	0.00750297	protein_coding	74.148	22.3999	42.3073	protein_coding	452.612	162.87	218.837
ETS1	ENSG00000134954.10	ZNF282	C2H2 ZF	ENSG00000170265.7	0.00890245	protein_coding	10.0338	13.1235	24.7383	protein_coding	452.612	162.87	218.837
ETS1	ENSG00000134954.10	IRF8	IRF	ENSG00000140968.6	0.00810687	protein_coding	2.7126	143.835	108.547	protein_coding	452.612	162.87	218.837
ETS1	ENSG00000134954.10	KLF11	C2H2 ZF	ENSG00000172059.6	0.00701822	protein_coding	3.5389	6.49125	9.48579	protein_coding	452.612	162.87	218.837
FLI1	ENSG00000151702.12	ZNF143	C2H2 ZF	ENSG00000166478.5	0.00890325	protein_coding	13.0232	36.5983	22.2393	protein_coding	25.0796	8.22835	13.354
ETS1	ENSG00000134954.10	PPARA	Nuclear receptor	ENSG00000186951.12	0.009385	protein_coding	5.8692	2.70244	4.58454	protein_coding	452.612	162.87	218.837
ETS1	ENSG00000134954.10	EGR3	C2H2 ZF	ENSG00000179388.8	0.0119139	protein_coding	1.35095	132.127	45.4685	protein_coding	452.612	162.87	218.837
FLI1	ENSG00000151702.12	PPARA	Nuclear receptor	ENSG00000186951.12	0.01029	protein_coding	5.8692	2.70244	4.58454	protein_coding	25.0796	8.22835	13.354
ETS1	ENSG00000134954.10	ATF1	bZIP	ENSG00000123268.4	0.0125351	protein_coding	14.2756	30.5257	29.5574	protein_coding	452.612	162.87	218.837
ETS1	ENSG00000134954.10	FOXO4	Forkhead	ENSG00000184481.12	0.00872154	protein_coding	16.4678	5.06429	4.3744	protein_coding	452.612	162.87	218.837
ETS1	ENSG00000134954.10	TBP	TBP	ENSG00000112592.8	0.00770322	protein_coding	19.5031	32.1191	37.229	protein_coding	452.612	162.87	218.837
ETS1	ENSG00000134954.10	EGR1	C2H2 ZF	ENSG00000120738.7	0.00850049	protein_coding	2.10936	136.228	76.4968	protein_coding	452.612	162.87	218.837
JUN	ENSG00000177606.5	EOMES	T-box	ENSG00000163508.8	0.00941059	protein_coding	5.25807	7.21463	1.02112	protein_coding	7.94923	14.3257	6.56083
ETS1	ENSG00000134954.10	ARID3B	ARID/BRIGHT	ENSG00000179361.13	0.00775398	protein_coding	10.7108	6.6985	7.73282	protein_coding	452.612	162.87	218.837
FLI1	ENSG00000151702.12	HINFP	C2H2 ZF	ENSG00000172273.8	0.00869672	protein_coding	8.65374	5.69092	4.99144	protein_coding	25.0796	8.22835	13.354
FLI1	ENSG00000151702.12	ZBTB14	C2H2 ZF	ENSG00000198081.6	0.007628	protein_coding	22.0902	8.83913	14.8651	protein_coding	25.0796	8.22835	13.354
FLI1	ENSG00000151702.12	AHR	bHLH	ENSG00000106546.8	0.00832647	protein_coding	9.41274	93.4629	53.6691	protein_coding	25.0796	8.22835	13.354
FLI1	ENSG00000151702.12	NR2C1	Nuclear receptor	ENSG00000120798.12	0.00731536	protein_coding	11.3642	5.96711	5.43842	protein_coding	25.0796	8.22835	13.354
FLI1	ENSG00000151702.12	GMEB1	SAND	ENSG00000162419.8	0.0114746	protein_coding	7.06271	17.2753	14.2273	protein_coding	25.0796	8.22835	13.354
ZNF384	ENSG00000126746.13	TFDP1	E2F	ENSG00000198176.8	0.00840114	protein_coding	10.5546	23.5774	99.2647	protein_coding	26.7544	40.1547	40.9261
ZNF384	ENSG00000126746.13	ZNF75D	C2H2 ZF	ENSG00000186376.10	0.00716737	protein_coding	8.38859	2.948	2.23164	protein_coding	26.7544	40.1547	40.9261
ZNF384	ENSG00000126746.13	HSF2	HSF	ENSG00000025156.8	0.00841015	protein_coding	20.2022	22.7886	23.1956	protein_coding	26.7544	40.1547	40.9261
ZNF384	ENSG00000126746.13	FOXO1	Forkhead	ENSG00000150907.6	0.0071039	protein_coding	94.0816	55.3038	49.5386	protein_coding	26.7544	40.1547	40.9261
ZNF384	ENSG00000126746.13	PLAGL2	C2H2 ZF	ENSG00000126003.6	0.00738926	protein_coding	19.1068	189.368	224.178	protein_coding	26.7544	40.1547	40.9261
ZNF384	ENSG00000126746.13	ZNF317	C2H2 ZF	ENSG00000130803.10	0.00887021	protein_coding	15.4262	29.4555	27.1963	protein_coding	26.7544	40.1547	40.9261
ZNF384	ENSG00000126746.13	NFATC1	Rel	ENSG00000131196.13	0.00740605	protein_coding	26.5075	58.5079	62.1764	protein_coding	26.7544	40.1547	40.9261
FOXJ2	ENSG00000065970.4	ARNT	bHLH	ENSG00000143437.16	0.0109086	protein_coding	23.8486	13.5725	25.4699	protein_coding	22.3937	14.2572	23.246
FOXJ2	ENSG00000065970.4	MNT	bHLH	ENSG00000070444.10	0.0104861	protein_coding	13.6034	20.317	11.22	protein_coding	22.3937	14.2572	23.246
FOXJ2	ENSG00000065970.4	MAFK	bZIP	ENSG00000198517.5	0.00904604	protein_coding	7.86877	20.1437	11.0981	protein_coding	22.3937	14.2572	23.246
FOXJ2	ENSG00000065970.4	PRDM1	C2H2 ZF	ENSG00000057657.10	0.00879257	protein_coding	1.80343	5.61797	1.2626	protein_coding	22.3937	14.2572	23.246
FOXJ2	ENSG00000065970.4	FOXN3	Forkhead	ENSG00000053254.11	0.0103764	protein_coding	27.663	22.1201	34.2645	protein_coding	22.3937	14.2572	23.246
FOXJ2	ENSG00000065970.4	ZNF281	C2H2 ZF	ENSG00000162702.7	0.00961611	protein_coding	19.3751	26.911	17.9295	protein_coding	22.3937	14.2572	23.246
FOXJ2	ENSG00000065970.4	SP2	C2H2 ZF	ENSG00000167182.11	0.00839791	protein_coding	34.5701	58.9216	43.343	protein_coding	22.3937	14.2572	23.246
FOXJ2	ENSG00000065970.4	ZBTB14	C2H2 ZF	ENSG00000198081.6	0.00796165	protein_coding	22.0902	8.83913	14.8651	protein_coding	22.3937	14.2572	23.246
FOXJ2	ENSG00000065970.4	IRF1	IRF	ENSG00000125347.9	0.013883	protein_coding	20.5275	150.134	102.101	protein_coding	22.3937	14.2572	23.246
FOXJ2	ENSG00000065970.4	GABPA	Ets	ENSG00000154727.6	0.00759087	protein_coding	10.4451	16.6224	11.9009	protein_coding	22.3937	14.2572	23.246
FOXJ2	ENSG00000065970.4	FOSL2	bZIP	ENSG00000075426.7	0.00816419	protein_coding	2.97949	68.8857	12.7455	protein_coding	22.3937	14.2572	23.246
FOXJ2	ENSG00000065970.4	FOXJ3	Forkhead	ENSG00000198815.4	0.00738563	protein_coding	35.5573	47.1979	34.4884	protein_coding	22.3937	14.2572	23.246
FOXJ2	ENSG00000065970.4	HIC2	C2H2 ZF	ENSG00000169635.5	0.00785054	protein_coding	6.41821	10.2589	5.99889	protein_coding	22.3937	14.2572	23.246
FOXJ2	ENSG00000065970.4	REL	Rel	ENSG00000162924.9	0.00939223	protein_coding	8.38764	216.888	56.7033	protein_coding	22.3937	14.2572	23.246
FOXJ2	ENSG00000065970.4	NFATC2	Rel	ENSG00000101096.15	0.00886915	protein_coding	33.903	24.7075	33.2928	protein_coding	22.3937	14.2572	23.246
FOXJ2	ENSG00000065970.4	FOXP1	Forkhead	ENSG00000114861.14	0.00994961	protein_coding	81.9274	148.688	90.0929	protein_coding	22.3937	14.2572	23.246
FOXJ2	ENSG00000065970.4	FOS	bZIP	ENSG00000170345.5	0.0102746	protein_coding	2.22869	22.6799	3.04045	protein_coding	22.3937	14.2572	23.246
FOXJ2	ENSG00000065970.4	FOSB	bZIP	ENSG00000125740.9	0.0118873	protein_coding	1.38153	14.6115	1.57442	protein_coding	22.3937	14.2572	23.246
FOXJ2	ENSG00000065970.4	LIN54	TCR/CxC	ENSG00000189308.6	0.00948262	protein_coding	8.21127	3.97463	10.4772	protein_coding	22.3937	14.2572	23.246
FOXJ2	ENSG00000065970.4	PKNOX1	Homeodomain	ENSG00000160199.10	0.0126143	protein_coding	6.08803	12.0409	6.80785	protein_coding	22.3937	14.2572	23.246
FOXJ2	ENSG00000065970.4	MYB	Myb/SANT	ENSG00000118513.14	0.00964724	protein_coding	8.9003	38.6206	20.9037	protein_coding	22.3937	14.2572	23.246
FOXJ2	ENSG00000065970.4	PPARA	Nuclear receptor	ENSG00000186951.12	0.00790289	protein_coding	5.8692	2.70244	4.58454	protein_coding	22.3937	14.2572	23.246
FOXJ2	ENSG00000065970.4	CTCF	C2H2 ZF	ENSG00000102974.10	0.0100754	protein_coding	50.6801	45.7903	69.2994	protein_coding	22.3937	14.2572	23.246
FOXJ2	ENSG00000065970.4	NR1D1	Nuclear receptor	ENSG00000126368.5	0.0108527	protein_coding	19.4206	54.1854	31.3215	protein_coding	22.3937	14.2572	23.246
FOXJ2	ENSG00000065970.4	ZNF24	C2H2 ZF	ENSG00000172466.11	0.0116512	protein_coding	24.04	36.803	22.5491	protein_coding	22.3937	14.2572	23.246
ETV6	ENSG00000139083.6	MEF2D	MADS box	ENSG00000116604.13	0.0163863	protein_coding	36.798	25.1847	25.5343	protein_coding	13.2511	14.9219	13.5622
ETV6	ENSG00000139083.6	RFX7	RFX	ENSG00000181827.10	0.0191313	protein_coding	32.1267	29.7361	30.4408	protein_coding	13.2511	14.9219	13.5622
ETV6	ENSG00000139083.6	SP3	C2H2 ZF	ENSG00000172845.9	0.00929493	protein_coding	25.2192	19.597	24.3094	protein_coding	13.2511	14.9219	13.5622
ETV6	ENSG00000139083.6	RXRB	Nuclear receptor	ENSG00000204231.6	0.0121136	protein_coding	35.4693	35.2471	33.4947	protein_coding	13.2511	14.9219	13.5622
ETV6	ENSG00000139083.6	NFATC3	Rel	ENSG00000072736.14	0.0116791	protein_coding	51.0818	34.6918	37.2125	protein_coding	13.2511	14.9219	13.5622
ETV6	ENSG00000139083.6	REST	C2H2 ZF	ENSG00000084093.11	0.0178167	protein_coding	25.1333	21.3827	20.2767	protein_coding	13.2511	14.9219	13.5622
ETV6	ENSG00000139083.6	MAX	bHLH	ENSG00000125952.14	0.00808163	protein_coding	63.3841	54.8169	59.4813	protein_coding	13.2511	14.9219	13.5622
VDR	ENSG00000111424.6	CTCF	C2H2 ZF	ENSG00000102974.10	0.0119417	protein_coding	50.6801	45.7903	69.2994	protein_coding	3.51623	9.31279	32.3455
VDR	ENSG00000111424.6	ELF1	Ets	ENSG00000120690.9	0.00823232	protein_coding	72.2458	77.2599	48.5997	protein_coding	3.51623	9.31279	32.3455
VDR	ENSG00000111424.6	MAZ	C2H2 ZF	ENSG00000103495.9	0.00753274	protein_coding	71.6034	91.0371	189.127	protein_coding	3.51623	9.31279	32.3455
VDR	ENSG00000111424.6	SP1	C2H2 ZF	ENSG00000185591.5	0.00865368	protein_coding	62.5147	64.2127	75.0785	protein_coding	3.51623	9.31279	32.3455
VDR	ENSG00000111424.6	ZNF354C	C2H2 ZF	ENSG00000177932.6	0.0080391	protein_coding	8.44028	6.87653	5.68326	protein_coding	3.51623	9.31279	32.3455
VDR	ENSG00000111424.6	ZKSCAN1	C2H2 ZF	ENSG00000106261.12	0.007899	protein_coding	29.63	31.1672	19.9696	protein_coding	3.51623	9.31279	32.3455
VDR	ENSG00000111424.6	KLF2	C2H2 ZF	ENSG00000127528.5	0.0099346	protein_coding	643.228	77.5309	3.57086	protein_coding	3.51623	9.31279	32.3455
VDR	ENSG00000111424.6	CUX1	CUT,Homeodomain	ENSG00000257923.5	0.00772887	protein_coding	11.876	9.90491	6.20826	protein_coding	3.51623	9.31279	32.3455
VDR	ENSG00000111424.6	JUND	bZIP	ENSG00000130522.4	0.00766904	protein_coding	74.3572	109.809	180.846	protein_coding	3.51623	9.31279	32.3455
VDR	ENSG00000111424.6	MZF1	C2H2 ZF	ENSG00000099326.4	0.007383	protein_coding	11.9589	11.2526	7.29446	protein_coding	3.51623	9.31279	32.3455
VDR	ENSG00000111424.6	ZNF282	C2H2 ZF	ENSG00000170265.7	0.00712727	protein_coding	10.0338	13.1235	24.7383	protein_coding	3.51623	9.31279	32.3455
ATF1	ENSG00000123268.4	MYB	Myb/SANT	ENSG00000118513.14	0.00999914	protein_coding	8.9003	38.6206	20.9037	protein_coding	14.2756	30.5257	29.5574
ATF1	ENSG00000123268.4	FOSL2	bZIP	ENSG00000075426.7	0.00951947	protein_coding	2.97949	68.8857	12.7455	protein_coding	14.2756	30.5257	29.5574
ATF1	ENSG00000123268.4	JUND	bZIP	ENSG00000130522.4	0.00730571	protein_coding	74.3572	109.809	180.846	protein_coding	14.2756	30.5257	29.5574
ATF1	ENSG00000123268.4	MAFK	bZIP	ENSG00000198517.5	0.00904527	protein_coding	7.86877	20.1437	11.0981	protein_coding	14.2756	30.5257	29.5574
ATF1	ENSG00000123268.4	BATF3	bZIP	ENSG00000123685.4	0.0110381	protein_coding	1.65811	41.5687	22.1585	protein_coding	14.2756	30.5257	29.5574
ATF1	ENSG00000123268.4	USF2	bHLH	ENSG00000105698.11	0.00704669	protein_coding	40.5727	17.8351	31.9485	protein_coding	14.2756	30.5257	29.5574
ATF1	ENSG00000123268.4	NR4A1	Nuclear receptor	ENSG00000123358.15	0.00934908	protein_coding	1.8162	137.343	53.2826	protein_coding	14.2756	30.5257	29.5574
ATF1	ENSG00000123268.4	SREBF2	bHLH	ENSG00000198911.7	0.00887548	protein_coding	19.003	55.9017	56.7619	protein_coding	14.2756	30.5257	29.5574
ATF1	ENSG00000123268.4	RUNX3	Runt	ENSG00000020633.14	0.00975702	protein_coding	47.4684	73.1236	109.548	protein_coding	14.2756	30.5257	29.5574
ATF1	ENSG00000123268.4	ZNF317	C2H2 ZF	ENSG00000130803.10	0.00857252	protein_coding	15.4262	29.4555	27.1963	protein_coding	14.2756	30.5257	29.5574
ATF1	ENSG00000123268.4	E2F4	E2F	ENSG00000205250.4	0.00719312	protein_coding	36.9757	130.328	155.478	protein_coding	14.2756	30.5257	29.5574
ATF1	ENSG00000123268.4	NR2F6	Nuclear receptor	ENSG00000160113.5	0.00734495	protein_coding	2.22949	6.45054	10.1467	protein_coding	14.2756	30.5257	29.5574
POU6F1	ENSG00000184271.11	PLAG1	C2H2 ZF	ENSG00000181690.3	0.00849059	protein_coding	8.37695	2.21704	1.83645	protein_coding	18.4611	8.11478	4.84338
ATF1	ENSG00000123268.4	KLF9	C2H2 ZF	ENSG00000119138.3	0.00852836	protein_coding	14.7466	42.3805	19.3454	protein_coding	14.2756	30.5257	29.5574
ATF1	ENSG00000123268.4	KLF11	C2H2 ZF	ENSG00000172059.6	0.00885317	protein_coding	3.5389	6.49125	9.48579	protein_coding	14.2756	30.5257	29.5574
ATF1	ENSG00000123268.4	RBPJ	CSL	ENSG00000168214.16	0.00943744	protein_coding	15.4007	45.7294	34.203	protein_coding	14.2756	30.5257	29.5574
ATF1	ENSG00000123268.4	HIF1A	bHLH	ENSG00000100644.12	0.00865773	protein_coding	37.8509	193.534	125.593	protein_coding	14.2756	30.5257	29.5574
POU6F1	ENSG00000184271.11	KLF2	C2H2 ZF	ENSG00000127528.5	0.0100896	protein_coding	643.228	77.5309	3.57086	protein_coding	18.4611	8.11478	4.84338
POU6F1	ENSG00000184271.11	KLF16	C2H2 ZF	ENSG00000129911.4	0.00842448	protein_coding	11.7561	43.2471	45.3241	protein_coding	18.4611	8.11478	4.84338
TFCP2	ENSG00000135457.5	KLF11	C2H2 ZF	ENSG00000172059.6	0.00780196	protein_coding	3.5389	6.49125	9.48579	protein_coding	20.5262	22.6365	30.7892
POU6F1	ENSG00000184271.11	HIC1	C2H2 ZF	ENSG00000177374.8	0.00871424	protein_coding	1.90744	22.6054	41.0085	protein_coding	18.4611	8.11478	4.84338
POU6F1	ENSG00000184271.11	ATF1	bZIP	ENSG00000123268.4	0.0073306	protein_coding	14.2756	30.5257	29.5574	protein_coding	18.4611	8.11478	4.84338
POU6F1	ENSG00000184271.11	FOXO4	Forkhead	ENSG00000184481.12	0.00887278	protein_coding	16.4678	5.06429	4.3744	protein_coding	18.4611	8.11478	4.84338
POU6F1	ENSG00000184271.11	ZNF75D	C2H2 ZF	ENSG00000186376.10	0.010233	protein_coding	8.38859	2.948	2.23164	protein_coding	18.4611	8.11478	4.84338
POU6F1	ENSG00000184271.11	VEZF1	C2H2 ZF	ENSG00000136451.4	0.00763479	protein_coding	35.7029	28.3574	20.778	protein_coding	18.4611	8.11478	4.84338
TFCP2	ENSG00000135457.5	CTCF	C2H2 ZF	ENSG00000102974.10	0.00888699	protein_coding	50.6801	45.7903	69.2994	protein_coding	20.5262	22.6365	30.7892
TFCP2	ENSG00000135457.5	ZEB1	C2H2 ZF,Homeodomain	ENSG00000148516.17	0.00805052	protein_coding	30.5601	27.0703	15.1315	protein_coding	20.5262	22.6365	30.7892
TFCP2	ENSG00000135457.5	BACH1	bZIP	ENSG00000156273.11	0.00738481	protein_coding	15.2362	29.6887	9.70708	protein_coding	20.5262	22.6365	30.7892
ATF1	ENSG00000123268.4	EGR2	C2H2 ZF	ENSG00000122877.9	0.00892069	protein_coding	2.12493	158.341	31.8664	protein_coding	14.2756	30.5257	29.5574
ATF1	ENSG00000123268.4	ATF4	bZIP	ENSG00000128272.10	0.00957208	protein_coding	83.1187	333.068	339.627	protein_coding	14.2756	30.5257	29.5574
ATF1	ENSG00000123268.4	FOXK1	Forkhead	ENSG00000164916.9	0.00843343	protein_coding	29.2615	39.2605	34.7856	protein_coding	14.2756	30.5257	29.5574
ATF1	ENSG00000123268.4	FOXK2	Forkhead	ENSG00000141568.15	0.00821882	protein_coding	14.4827	45.2678	41.1481	protein_coding	14.2756	30.5257	29.5574
NR4A1	ENSG00000123358.15	ZNF281	C2H2 ZF	ENSG00000162702.7	0.0147914	protein_coding	19.3751	26.911	17.9295	protein_coding	1.8162	137.343	53.2826
NR4A1	ENSG00000123358.15	KLF6	C2H2 ZF	ENSG00000067082.10	0.00946307	protein_coding	20.002	29.0863	17.9519	protein_coding	1.8162	137.343	53.2826
NR4A1	ENSG00000123358.15	KLF10	C2H2 ZF	ENSG00000155090.10	0.0141664	protein_coding	2.98347	101.32	25.2161	protein_coding	1.8162	137.343	53.2826
NR4A1	ENSG00000123358.15	EGR1	C2H2 ZF	ENSG00000120738.7	0.00742369	protein_coding	2.10936	136.228	76.4968	protein_coding	1.8162	137.343	53.2826
NR4A1	ENSG00000123358.15	IKZF1	C2H2 ZF	ENSG00000185811.12	0.00872088	protein_coding	140.55	182.375	130.244	protein_coding	1.8162	137.343	53.2826
NR4A1	ENSG00000123358.15	NFIL3	bZIP	ENSG00000165030.3	0.00763142	protein_coding	2.9022	11.3432	3.81128	protein_coding	1.8162	137.343	53.2826
NR4A1	ENSG00000123358.15	ZNF140	C2H2 ZF	ENSG00000196387.5	0.00744818	protein_coding	7.55863	11.9829	6.05519	protein_coding	1.8162	137.343	53.2826
NR4A1	ENSG00000123358.15	DDIT3	bZIP	ENSG00000175197.6	0.0108176	protein_coding	12.2974	35.3201	14.9946	protein_coding	1.8162	137.343	53.2826
NR4A1	ENSG00000123358.15	CEBPG	bZIP	ENSG00000153879.4	0.00952653	protein_coding	9.95546	26.2151	15.8662	protein_coding	1.8162	137.343	53.2826
NR4A1	ENSG00000123358.15	PKNOX1	Homeodomain	ENSG00000160199.10	0.00958174	protein_coding	6.08803	12.0409	6.80785	protein_coding	1.8162	137.343	53.2826
NR4A1	ENSG00000123358.15	ZNF460	C2H2 ZF	ENSG00000197714.4	0.00777722	protein_coding	31.8465	67.1283	30.8887	protein_coding	1.8162	137.343	53.2826
NR4A1	ENSG00000123358.15	E2F6	E2F	ENSG00000169016.12	0.0105834	protein_coding	2.84755	10.2704	6.21233	protein_coding	1.8162	137.343	53.2826
NR4A1	ENSG00000123358.15	RELB	Rel	ENSG00000104856.9	0.0101666	protein_coding	8.90223	122.195	61.4806	protein_coding	1.8162	137.343	53.2826
NR4A1	ENSG00000123358.15	EGR2	C2H2 ZF	ENSG00000122877.9	0.0127666	protein_coding	2.12493	158.341	31.8664	protein_coding	1.8162	137.343	53.2826
NR4A1	ENSG00000123358.15	RREB1	C2H2 ZF	ENSG00000124782.15	0.0101176	protein_coding	16.4582	21.8455	9.185	protein_coding	1.8162	137.343	53.2826
NR4A1	ENSG00000123358.15	ARNT	bHLH	ENSG00000143437.16	0.00837993	protein_coding	23.8486	13.5725	25.4699	protein_coding	1.8162	137.343	53.2826
NR4A1	ENSG00000123358.15	ETV3	Ets	ENSG00000117036.7	0.009199	protein_coding	12.9579	18.6252	12.707	protein_coding	1.8162	137.343	53.2826
NR4A1	ENSG00000123358.15	FOXK1	Forkhead	ENSG00000164916.9	0.00723515	protein_coding	29.2615	39.2605	34.7856	protein_coding	1.8162	137.343	53.2826
NR4A1	ENSG00000123358.15	FOXP1	Forkhead	ENSG00000114861.14	0.00932918	protein_coding	81.9274	148.688	90.0929	protein_coding	1.8162	137.343	53.2826
NR4A1	ENSG00000123358.15	ZBTB14	C2H2 ZF	ENSG00000198081.6	0.0129816	protein_coding	22.0902	8.83913	14.8651	protein_coding	1.8162	137.343	53.2826
NR4A1	ENSG00000123358.15	SMAD2	NA	ENSG00000175387.11	0.00844884	protein_coding	21.3528	16.7268	18.7465	protein_coding	1.8162	137.343	53.2826
NR4A1	ENSG00000123358.15	REL	Rel	ENSG00000162924.9	0.00797586	protein_coding	8.38764	216.888	56.7033	protein_coding	1.8162	137.343	53.2826
ZNF740	ENSG00000139651.9	NFYC	Unknown	ENSG00000066136.15	0.00924073	protein_coding	17.5252	24.9995	29.7307	protein_coding	30.1018	20.8814	16.9006
RARG	ENSG00000172819.12	SP3	C2H2 ZF	ENSG00000172845.9	0.0142242	protein_coding	25.2192	19.597	24.3094	protein_coding	16.4433	7.00141	13.5178
RARG	ENSG00000172819.12	CEBPG	bZIP	ENSG00000153879.4	0.0139637	protein_coding	9.95546	26.2151	15.8662	protein_coding	16.4433	7.00141	13.5178
ZNF740	ENSG00000139651.9	ERF	Ets	ENSG00000105722.5	0.00710755	protein_coding	16.4224	54.4922	63.5516	protein_coding	30.1018	20.8814	16.9006
ZNF740	ENSG00000139651.9	ELK1	Ets	ENSG00000126767.13	0.00803771	protein_coding	18.6585	40.6808	59.8587	protein_coding	30.1018	20.8814	16.9006
ZNF740	ENSG00000139651.9	RELA	Rel	ENSG00000173039.14	0.0081529	protein_coding	47.6368	71.7005	69.9761	protein_coding	30.1018	20.8814	16.9006
ZNF740	ENSG00000139651.9	TCF3	bHLH	ENSG00000071564.10	0.00863854	protein_coding	18.7774	32.7741	47.0143	protein_coding	30.1018	20.8814	16.9006
ZNF740	ENSG00000139651.9	BATF	bZIP	ENSG00000156127.6	0.00760104	protein_coding	5.33826	97.4656	88.5682	protein_coding	30.1018	20.8814	16.9006
ZNF740	ENSG00000139651.9	MEF2D	MADS box	ENSG00000116604.13	0.00811547	protein_coding	36.798	25.1847	25.5343	protein_coding	30.1018	20.8814	16.9006
ZNF740	ENSG00000139651.9	KLF2	C2H2 ZF	ENSG00000127528.5	0.00927806	protein_coding	643.228	77.5309	3.57086	protein_coding	30.1018	20.8814	16.9006
ZNF740	ENSG00000139651.9	NFE2L1	bZIP	ENSG00000082641.11	0.00730466	protein_coding	20.3803	36.5648	41.2383	protein_coding	30.1018	20.8814	16.9006
ZNF740	ENSG00000139651.9	PBX3	Homeodomain	ENSG00000167081.12	0.00830846	protein_coding	9.21206	5.42354	5.54844	protein_coding	30.1018	20.8814	16.9006
RARG	ENSG00000172819.12	FOSL2	bZIP	ENSG00000075426.7	0.00897906	protein_coding	2.97949	68.8857	12.7455	protein_coding	16.4433	7.00141	13.5178
RARG	ENSG00000172819.12	BATF3	bZIP	ENSG00000123685.4	0.00988544	protein_coding	1.65811	41.5687	22.1585	protein_coding	16.4433	7.00141	13.5178
RARG	ENSG00000172819.12	SMAD2	NA	ENSG00000175387.11	0.0103687	protein_coding	21.3528	16.7268	18.7465	protein_coding	16.4433	7.00141	13.5178
ZNF740	ENSG00000139651.9	RUNX3	Runt	ENSG00000020633.14	0.00711397	protein_coding	47.4684	73.1236	109.548	protein_coding	30.1018	20.8814	16.9006
RARG	ENSG00000172819.12	SP2	C2H2 ZF	ENSG00000167182.11	0.0103028	protein_coding	34.5701	58.9216	43.343	protein_coding	16.4433	7.00141	13.5178
RARG	ENSG00000172819.12	SP4	C2H2 ZF	ENSG00000105866.9	0.0104206	protein_coding	25.1884	15.9254	18.3065	protein_coding	16.4433	7.00141	13.5178
RARG	ENSG00000172819.12	NR2C1	Nuclear receptor	ENSG00000120798.12	0.00773286	protein_coding	11.3642	5.96711	5.43842	protein_coding	16.4433	7.00141	13.5178
ZNF740	ENSG00000139651.9	RORA	Nuclear receptor	ENSG00000069667.11	0.00884521	protein_coding	23.2819	9.22455	1.52915	protein_coding	30.1018	20.8814	16.9006
RARG	ENSG00000172819.12	PBX3	Homeodomain	ENSG00000167081.12	0.00754463	protein_coding	9.21206	5.42354	5.54844	protein_coding	16.4433	7.00141	13.5178
ZNF740	ENSG00000139651.9	SMAD4	SMAD	ENSG00000141646.9	0.00788296	protein_coding	13.9346	9.28591	7.65724	protein_coding	30.1018	20.8814	16.9006
ZNF740	ENSG00000139651.9	YY1	C2H2 ZF	ENSG00000100811.6	0.00815996	protein_coding	24.0952	26.6803	30.2082	protein_coding	30.1018	20.8814	16.9006
RARG	ENSG00000172819.12	ELF4	Ets	ENSG00000102034.12	0.00780273	protein_coding	26.4618	20.1657	33.0515	protein_coding	16.4433	7.00141	13.5178
ZNF740	ENSG00000139651.9	HINFP	C2H2 ZF	ENSG00000172273.8	0.00940702	protein_coding	8.65374	5.69092	4.99144	protein_coding	30.1018	20.8814	16.9006
SP1	ENSG00000185591.5	CREB3L2	bZIP	ENSG00000182158.10	0.00779256	protein_coding	8.23878	10.8163	14.8018	protein_coding	62.5147	64.2127	75.0785
ATF7	ENSG00000170653.14	RREB1	C2H2 ZF	ENSG00000124782.15	0.00708829	protein_coding	16.4582	21.8455	9.185	protein_coding	12.0374	9.58847	13.0137
ATF7	ENSG00000170653.14	RFX1	RFX	ENSG00000132005.4	0.0078585	protein_coding	12.2825	7.71665	10.0227	protein_coding	12.0374	9.58847	13.0137
ATF7	ENSG00000170653.14	JUN	bZIP	ENSG00000177606.5	0.0139265	protein_coding	7.94923	14.3257	6.56083	protein_coding	12.0374	9.58847	13.0137
ATF7	ENSG00000170653.14	NRF1	Unknown	ENSG00000106459.10	0.0161861	protein_coding	12.1101	19.1807	7.90798	protein_coding	12.0374	9.58847	13.0137
ATF7	ENSG00000170653.14	SNAI1	C2H2 ZF	ENSG00000124216.3	0.00908253	protein_coding	1.30754	8.60721	3.42322	protein_coding	12.0374	9.58847	13.0137
ATF7	ENSG00000170653.14	ZNF24	C2H2 ZF	ENSG00000172466.11	0.011251	protein_coding	24.04	36.803	22.5491	protein_coding	12.0374	9.58847	13.0137
ATF7	ENSG00000170653.14	IRF3	IRF	ENSG00000126456.11	0.0111257	protein_coding	26.1248	12.3178	23.4694	protein_coding	12.0374	9.58847	13.0137
ATF7	ENSG00000170653.14	AHR	bHLH	ENSG00000106546.8	0.00917886	protein_coding	9.41274	93.4629	53.6691	protein_coding	12.0374	9.58847	13.0137
ATF7	ENSG00000170653.14	ZBTB6	C2H2 ZF	ENSG00000186130.4	0.0153162	protein_coding	14.1741	21.0704	12.5025	protein_coding	12.0374	9.58847	13.0137
ATF7	ENSG00000170653.14	PRDM1	C2H2 ZF	ENSG00000057657.10	0.0146319	protein_coding	1.80343	5.61797	1.2626	protein_coding	12.0374	9.58847	13.0137
ATF7	ENSG00000170653.14	ZNF281	C2H2 ZF	ENSG00000162702.7	0.0091463	protein_coding	19.3751	26.911	17.9295	protein_coding	12.0374	9.58847	13.0137
ATF7	ENSG00000170653.14	EOMES	T-box	ENSG00000163508.8	0.0112347	protein_coding	5.25807	7.21463	1.02112	protein_coding	12.0374	9.58847	13.0137
ATF7	ENSG00000170653.14	CTCF	C2H2 ZF	ENSG00000102974.10	0.0102629	protein_coding	50.6801	45.7903	69.2994	protein_coding	12.0374	9.58847	13.0137
ATF7	ENSG00000170653.14	TGIF1	Homeodomain	ENSG00000177426.16	0.0110733	protein_coding	11.7375	22.7534	3.25931	protein_coding	12.0374	9.58847	13.0137
ATF7	ENSG00000170653.14	EGR2	C2H2 ZF	ENSG00000122877.9	0.00871887	protein_coding	2.12493	158.341	31.8664	protein_coding	12.0374	9.58847	13.0137
DDIT3	ENSG00000175197.6	FOSL2	bZIP	ENSG00000075426.7	0.00847556	protein_coding	2.97949	68.8857	12.7455	protein_coding	12.2974	35.3201	14.9946
DDIT3	ENSG00000175197.6	FOSB	bZIP	ENSG00000125740.9	0.0148049	protein_coding	1.38153	14.6115	1.57442	protein_coding	12.2974	35.3201	14.9946
DDIT3	ENSG00000175197.6	MAFK	bZIP	ENSG00000198517.5	0.00924654	protein_coding	7.86877	20.1437	11.0981	protein_coding	12.2974	35.3201	14.9946
DDIT3	ENSG00000175197.6	GABPA	Ets	ENSG00000154727.6	0.00972768	protein_coding	10.4451	16.6224	11.9009	protein_coding	12.2974	35.3201	14.9946
DDIT3	ENSG00000175197.6	ZNF140	C2H2 ZF	ENSG00000196387.5	0.0086033	protein_coding	7.55863	11.9829	6.05519	protein_coding	12.2974	35.3201	14.9946
DDIT3	ENSG00000175197.6	KLF6	C2H2 ZF	ENSG00000067082.10	0.00926232	protein_coding	20.002	29.0863	17.9519	protein_coding	12.2974	35.3201	14.9946
STAT6	ENSG00000166888.6	KLF9	C2H2 ZF	ENSG00000119138.3	0.00804894	protein_coding	14.7466	42.3805	19.3454	protein_coding	68.1825	167.043	162.319
STAT6	ENSG00000166888.6	REL	Rel	ENSG00000162924.9	0.00967001	protein_coding	8.38764	216.888	56.7033	protein_coding	68.1825	167.043	162.319
STAT6	ENSG00000166888.6	PLAGL2	C2H2 ZF	ENSG00000126003.6	0.00740281	protein_coding	19.1068	189.368	224.178	protein_coding	68.1825	167.043	162.319
STAT6	ENSG00000166888.6	RBPJ	CSL	ENSG00000168214.16	0.00797081	protein_coding	15.4007	45.7294	34.203	protein_coding	68.1825	167.043	162.319
STAT6	ENSG00000166888.6	ATF1	bZIP	ENSG00000123268.4	0.00849692	protein_coding	14.2756	30.5257	29.5574	protein_coding	68.1825	167.043	162.319
STAT6	ENSG00000166888.6	NFIX	SMAD	ENSG00000008441.12	0.00933888	protein_coding	4.02934	24.3211	14.9281	protein_coding	68.1825	167.043	162.319
STAT6	ENSG00000166888.6	ARID3B	ARID/BRIGHT	ENSG00000179361.13	0.00907117	protein_coding	10.7108	6.6985	7.73282	protein_coding	68.1825	167.043	162.319
STAT6	ENSG00000166888.6	RFX3	RFX	ENSG00000080298.11	0.00740786	protein_coding	8.42273	4.67247	4.49608	protein_coding	68.1825	167.043	162.319
STAT6	ENSG00000166888.6	NFAT5	Rel	ENSG00000102908.16	0.00739158	protein_coding	13.1549	54.2287	31.9488	protein_coding	68.1825	167.043	162.319
STAT6	ENSG00000166888.6	IRF8	IRF	ENSG00000140968.6	0.00993299	protein_coding	2.7126	143.835	108.547	protein_coding	68.1825	167.043	162.319
DDIT3	ENSG00000175197.6	ZNF263	C2H2 ZF	ENSG00000006194.6	0.0119551	protein_coding	13.8496	19.5448	8.63775	protein_coding	12.2974	35.3201	14.9946
DDIT3	ENSG00000175197.6	NRF1	Unknown	ENSG00000106459.10	0.00881229	protein_coding	12.1101	19.1807	7.90798	protein_coding	12.2974	35.3201	14.9946
DDIT3	ENSG00000175197.6	REL	Rel	ENSG00000162924.9	0.011401	protein_coding	8.38764	216.888	56.7033	protein_coding	12.2974	35.3201	14.9946
DDIT3	ENSG00000175197.6	AHR	bHLH	ENSG00000106546.8	0.00870248	protein_coding	9.41274	93.4629	53.6691	protein_coding	12.2974	35.3201	14.9946
DDIT3	ENSG00000175197.6	ARNT	bHLH	ENSG00000143437.16	0.0105925	protein_coding	23.8486	13.5725	25.4699	protein_coding	12.2974	35.3201	14.9946
DDIT3	ENSG00000175197.6	HIC2	C2H2 ZF	ENSG00000169635.5	0.00737599	protein_coding	6.41821	10.2589	5.99889	protein_coding	12.2974	35.3201	14.9946
DDIT3	ENSG00000175197.6	EGR3	C2H2 ZF	ENSG00000179388.8	0.0104381	protein_coding	1.35095	132.127	45.4685	protein_coding	12.2974	35.3201	14.9946
DDIT3	ENSG00000175197.6	NR1D1	Nuclear receptor	ENSG00000126368.5	0.00815925	protein_coding	19.4206	54.1854	31.3215	protein_coding	12.2974	35.3201	14.9946
DDIT3	ENSG00000175197.6	ELK3	Ets	ENSG00000111145.3	0.00874023	protein_coding	28.9716	53.2809	27.9617	protein_coding	12.2974	35.3201	14.9946
DDIT3	ENSG00000175197.6	ETV3	Ets	ENSG00000117036.7	0.0138284	protein_coding	12.9579	18.6252	12.707	protein_coding	12.2974	35.3201	14.9946
DDIT3	ENSG00000175197.6	ZNF281	C2H2 ZF	ENSG00000162702.7	0.00950904	protein_coding	19.3751	26.911	17.9295	protein_coding	12.2974	35.3201	14.9946
DDIT3	ENSG00000175197.6	E2F6	E2F	ENSG00000169016.12	0.0113867	protein_coding	2.84755	10.2704	6.21233	protein_coding	12.2974	35.3201	14.9946
DDIT3	ENSG00000175197.6	IRF3	IRF	ENSG00000126456.11	0.0104752	protein_coding	26.1248	12.3178	23.4694	protein_coding	12.2974	35.3201	14.9946
DDIT3	ENSG00000175197.6	IKZF1	C2H2 ZF	ENSG00000185811.12	0.00894811	protein_coding	140.55	182.375	130.244	protein_coding	12.2974	35.3201	14.9946
DDIT3	ENSG00000175197.6	KLF9	C2H2 ZF	ENSG00000119138.3	0.0115202	protein_coding	14.7466	42.3805	19.3454	protein_coding	12.2974	35.3201	14.9946
DDIT3	ENSG00000175197.6	NFATC2	Rel	ENSG00000101096.15	0.00988882	protein_coding	33.903	24.7075	33.2928	protein_coding	12.2974	35.3201	14.9946
DDIT3	ENSG00000175197.6	ZNF136	C2H2 ZF	ENSG00000196646.7	0.00960632	protein_coding	7.35826	8.26587	5.50982	protein_coding	12.2974	35.3201	14.9946
DDIT3	ENSG00000175197.6	ELK4	Ets	ENSG00000158711.9	0.0130355	protein_coding	67.4856	107.039	70.1592	protein_coding	12.2974	35.3201	14.9946
DDIT3	ENSG00000175197.6	USF2	bHLH	ENSG00000105698.11	0.00840069	protein_coding	40.5727	17.8351	31.9485	protein_coding	12.2974	35.3201	14.9946
NR2C1	ENSG00000120798.12	PLAGL2	C2H2 ZF	ENSG00000126003.6	0.008252	protein_coding	19.1068	189.368	224.178	protein_coding	11.3642	5.96711	5.43842
NR2C1	ENSG00000120798.12	MYC	bHLH	ENSG00000136997.10	0.00765909	protein_coding	102.767	1095.75	648.817	protein_coding	11.3642	5.96711	5.43842
NR2C1	ENSG00000120798.12	TBP	TBP	ENSG00000112592.8	0.00993302	protein_coding	19.5031	32.1191	37.229	protein_coding	11.3642	5.96711	5.43842
NR2C1	ENSG00000120798.12	NFATC1	Rel	ENSG00000131196.13	0.00772952	protein_coding	26.5075	58.5079	62.1764	protein_coding	11.3642	5.96711	5.43842
NR2C1	ENSG00000120798.12	KLF16	C2H2 ZF	ENSG00000129911.4	0.0073947	protein_coding	11.7561	43.2471	45.3241	protein_coding	11.3642	5.96711	5.43842
NR2C1	ENSG00000120798.12	TFAP4	bHLH	ENSG00000090447.7	0.0107032	protein_coding	6.44111	12.8682	14.9109	protein_coding	11.3642	5.96711	5.43842
NR2C1	ENSG00000120798.12	ETS2	Ets	ENSG00000157557.7	0.00795683	protein_coding	7.37297	30.5099	26.3494	protein_coding	11.3642	5.96711	5.43842
NR2C1	ENSG00000120798.12	NFE2L1	bZIP	ENSG00000082641.11	0.0087375	protein_coding	20.3803	36.5648	41.2383	protein_coding	11.3642	5.96711	5.43842
NR2C1	ENSG00000120798.12	STAT1	STAT	ENSG00000115415.14	0.00705506	protein_coding	35.0834	445.774	430.889	protein_coding	11.3642	5.96711	5.43842
NR2C1	ENSG00000120798.12	ZNF740	C2H2 ZF	ENSG00000139651.9	0.00848929	protein_coding	30.1018	20.8814	16.9006	protein_coding	11.3642	5.96711	5.43842
ELK3	ENSG00000111145.3	MAFK	bZIP	ENSG00000198517.5	0.00754315	protein_coding	7.86877	20.1437	11.0981	protein_coding	28.9716	53.2809	27.9617
ELK3	ENSG00000111145.3	E2F6	E2F	ENSG00000169016.12	0.00795157	protein_coding	2.84755	10.2704	6.21233	protein_coding	28.9716	53.2809	27.9617
ELK3	ENSG00000111145.3	ZNF281	C2H2 ZF	ENSG00000162702.7	0.013517	protein_coding	19.3751	26.911	17.9295	protein_coding	28.9716	53.2809	27.9617
ELK3	ENSG00000111145.3	STAT5A	STAT	ENSG00000126561.12	0.0108689	protein_coding	36.4983	316.372	118.146	protein_coding	28.9716	53.2809	27.9617
ELK3	ENSG00000111145.3	ELF4	Ets	ENSG00000102034.12	0.00782473	protein_coding	26.4618	20.1657	33.0515	protein_coding	28.9716	53.2809	27.9617
ELK3	ENSG00000111145.3	ETV3	Ets	ENSG00000117036.7	0.0106739	protein_coding	12.9579	18.6252	12.707	protein_coding	28.9716	53.2809	27.9617
ELK3	ENSG00000111145.3	CEBPG	bZIP	ENSG00000153879.4	0.00717731	protein_coding	9.95546	26.2151	15.8662	protein_coding	28.9716	53.2809	27.9617
ELK3	ENSG00000111145.3	NFE2L2	bZIP	ENSG00000116044.11	0.0109814	protein_coding	43.1876	100.955	67.5731	protein_coding	28.9716	53.2809	27.9617
ELK3	ENSG00000111145.3	ZNF24	C2H2 ZF	ENSG00000172466.11	0.00976589	protein_coding	24.04	36.803	22.5491	protein_coding	28.9716	53.2809	27.9617
ELK3	ENSG00000111145.3	IKZF1	C2H2 ZF	ENSG00000185811.12	0.00845282	protein_coding	140.55	182.375	130.244	protein_coding	28.9716	53.2809	27.9617
ELK3	ENSG00000111145.3	NFYA	CBF/NF-Y	ENSG00000001167.10	0.0109247	protein_coding	22.9157	43.4457	28.5316	protein_coding	28.9716	53.2809	27.9617
ELK3	ENSG00000111145.3	KLF9	C2H2 ZF	ENSG00000119138.3	0.00926663	protein_coding	14.7466	42.3805	19.3454	protein_coding	28.9716	53.2809	27.9617
ELK3	ENSG00000111145.3	ZNF460	C2H2 ZF	ENSG00000197714.4	0.0153124	protein_coding	31.8465	67.1283	30.8887	protein_coding	28.9716	53.2809	27.9617
ELK3	ENSG00000111145.3	KLF10	C2H2 ZF	ENSG00000155090.10	0.00802559	protein_coding	2.98347	101.32	25.2161	protein_coding	28.9716	53.2809	27.9617
ELK3	ENSG00000111145.3	FOSB	bZIP	ENSG00000125740.9	0.0104193	protein_coding	1.38153	14.6115	1.57442	protein_coding	28.9716	53.2809	27.9617
ELK3	ENSG00000111145.3	FOSL2	bZIP	ENSG00000075426.7	0.00875834	protein_coding	2.97949	68.8857	12.7455	protein_coding	28.9716	53.2809	27.9617
ELK3	ENSG00000111145.3	REL	Rel	ENSG00000162924.9	0.00905297	protein_coding	8.38764	216.888	56.7033	protein_coding	28.9716	53.2809	27.9617
ELK3	ENSG00000111145.3	FOXJ3	Forkhead	ENSG00000198815.4	0.00738955	protein_coding	35.5573	47.1979	34.4884	protein_coding	28.9716	53.2809	27.9617
ELK3	ENSG00000111145.3	FOXJ2	Forkhead	ENSG00000065970.4	0.00934015	protein_coding	22.3937	14.2572	23.246	protein_coding	28.9716	53.2809	27.9617
ELK3	ENSG00000111145.3	ZNF136	C2H2 ZF	ENSG00000196646.7	0.00787158	protein_coding	7.35826	8.26587	5.50982	protein_coding	28.9716	53.2809	27.9617
ELK3	ENSG00000111145.3	ATF3	bZIP	ENSG00000162772.12	0.00805891	protein_coding	1.83901	12.5986	5.37156	protein_coding	28.9716	53.2809	27.9617
ELK3	ENSG00000111145.3	IRF3	IRF	ENSG00000126456.11	0.0144304	protein_coding	26.1248	12.3178	23.4694	protein_coding	28.9716	53.2809	27.9617
ELK3	ENSG00000111145.3	RREB1	C2H2 ZF	ENSG00000124782.15	0.00739452	protein_coding	16.4582	21.8455	9.185	protein_coding	28.9716	53.2809	27.9617
ELK3	ENSG00000111145.3	HIF1A	bHLH	ENSG00000100644.12	0.00756931	protein_coding	37.8509	193.534	125.593	protein_coding	28.9716	53.2809	27.9617
ELK3	ENSG00000111145.3	PRDM1	C2H2 ZF	ENSG00000057657.10	0.00747783	protein_coding	1.80343	5.61797	1.2626	protein_coding	28.9716	53.2809	27.9617
ELK3	ENSG00000111145.3	HIC2	C2H2 ZF	ENSG00000169635.5	0.00808442	protein_coding	6.41821	10.2589	5.99889	protein_coding	28.9716	53.2809	27.9617
ELK3	ENSG00000111145.3	MAFG	bZIP	ENSG00000197063.6	0.00718887	protein_coding	5.59852	24.4516	19.1702	protein_coding	28.9716	53.2809	27.9617
ELK3	ENSG00000111145.3	BACH2	bZIP	ENSG00000112182.10	0.00754423	protein_coding	49.8115	217.835	76.7515	protein_coding	28.9716	53.2809	27.9617
ELK3	ENSG00000111145.3	EGR3	C2H2 ZF	ENSG00000179388.8	0.00958924	protein_coding	1.35095	132.127	45.4685	protein_coding	28.9716	53.2809	27.9617
ELK3	ENSG00000111145.3	KLF6	C2H2 ZF	ENSG00000067082.10	0.0082142	protein_coding	20.002	29.0863	17.9519	protein_coding	28.9716	53.2809	27.9617
ELK3	ENSG00000111145.3	KLF13	C2H2 ZF	ENSG00000169926.5	0.00831151	protein_coding	74.148	22.3999	42.3073	protein_coding	28.9716	53.2809	27.9617
ELK3	ENSG00000111145.3	HLTF	NA	ENSG00000071794.11	0.0135227	protein_coding	10.3092	5.83055	9.54802	protein_coding	28.9716	53.2809	27.9617
ELK3	ENSG00000111145.3	TGIF1	Homeodomain	ENSG00000177426.16	0.00833797	protein_coding	11.7375	22.7534	3.25931	protein_coding	28.9716	53.2809	27.9617
NFYB	ENSG00000120837.3	MAX	bHLH	ENSG00000125952.14	0.00808127	protein_coding	63.3841	54.8169	59.4813	protein_coding	4.8532	5.77657	5.59654
NFYB	ENSG00000120837.3	RBPJ	CSL	ENSG00000168214.16	0.0257572	protein_coding	15.4007	45.7294	34.203	protein_coding	4.8532	5.77657	5.59654
NFYB	ENSG00000120837.3	STAT1	STAT	ENSG00000115415.14	0.0154225	protein_coding	35.0834	445.774	430.889	protein_coding	4.8532	5.77657	5.59654
NFYB	ENSG00000120837.3	NFYA	CBF/NF-Y	ENSG00000001167.10	0.00959805	protein_coding	22.9157	43.4457	28.5316	protein_coding	4.8532	5.77657	5.59654
NFYB	ENSG00000120837.3	TFE3	bHLH	ENSG00000068323.12	0.00856161	protein_coding	14.5099	17.4215	23.2081	protein_coding	4.8532	5.77657	5.59654
PRDM4	ENSG00000110851.7	KLF16	C2H2 ZF	ENSG00000129911.4	0.00759202	protein_coding	11.7561	43.2471	45.3241	protein_coding	22.3441	36.1157	33.6699
PRDM4	ENSG00000110851.7	ETS2	Ets	ENSG00000157557.7	0.00979299	protein_coding	7.37297	30.5099	26.3494	protein_coding	22.3441	36.1157	33.6699
PRDM4	ENSG00000110851.7	ETS1	Ets	ENSG00000134954.10	0.0080637	protein_coding	452.612	162.87	218.837	protein_coding	22.3441	36.1157	33.6699
PRDM4	ENSG00000110851.7	NFKB2	Rel	ENSG00000077150.13	0.00774713	protein_coding	22.2687	178.43	201.908	protein_coding	22.3441	36.1157	33.6699
MLXIP	ENSG00000175727.9	TFDP1	E2F	ENSG00000198176.8	0.0104864	protein_coding	10.5546	23.5774	99.2647	protein_coding	38.3803	32.1952	21.9588
MLXIP	ENSG00000175727.9	MLX	bHLH	ENSG00000108788.7	0.0100029	protein_coding	19.8728	32.4765	59.2937	protein_coding	38.3803	32.1952	21.9588
MLXIP	ENSG00000175727.9	KLF2	C2H2 ZF	ENSG00000127528.5	0.0119858	protein_coding	643.228	77.5309	3.57086	protein_coding	38.3803	32.1952	21.9588
MLXIP	ENSG00000175727.9	NRF1	Unknown	ENSG00000106459.10	0.00872174	protein_coding	12.1101	19.1807	7.90798	protein_coding	38.3803	32.1952	21.9588
MLXIP	ENSG00000175727.9	ELF1	Ets	ENSG00000120690.9	0.0104386	protein_coding	72.2458	77.2599	48.5997	protein_coding	38.3803	32.1952	21.9588
MLXIP	ENSG00000175727.9	ZNF341	C2H2 ZF	ENSG00000131061.9	0.00869076	protein_coding	4.7502	6.20738	8.51451	protein_coding	38.3803	32.1952	21.9588
MLXIP	ENSG00000175727.9	RREB1	C2H2 ZF	ENSG00000124782.15	0.00858715	protein_coding	16.4582	21.8455	9.185	protein_coding	38.3803	32.1952	21.9588
MLXIP	ENSG00000175727.9	THAP11	THAP finger	ENSG00000168286.1	0.00722518	protein_coding	44.1418	46.0762	84.2597	protein_coding	38.3803	32.1952	21.9588
MLXIP	ENSG00000175727.9	NR1H2	Nuclear receptor	ENSG00000131408.9	0.00787503	protein_coding	32.619	43.1217	52.5345	protein_coding	38.3803	32.1952	21.9588
MLXIP	ENSG00000175727.9	NR2F6	Nuclear receptor	ENSG00000160113.5	0.0083812	protein_coding	2.22949	6.45054	10.1467	protein_coding	38.3803	32.1952	21.9588
MLXIP	ENSG00000175727.9	JUND	bZIP	ENSG00000130522.4	0.00832735	protein_coding	74.3572	109.809	180.846	protein_coding	38.3803	32.1952	21.9588
MLXIP	ENSG00000175727.9	GATA3	GATA	ENSG00000107485.11	0.00732271	protein_coding	27.0461	22.0926	11.966	protein_coding	38.3803	32.1952	21.9588
MLXIP	ENSG00000175727.9	FOXO3	Forkhead	ENSG00000118689.10	0.00742579	protein_coding	9.87318	6.89084	3.15724	protein_coding	38.3803	32.1952	21.9588
MLXIP	ENSG00000175727.9	FOXO1	Forkhead	ENSG00000150907.6	0.0131916	protein_coding	94.0816	55.3038	49.5386	protein_coding	38.3803	32.1952	21.9588
MLXIP	ENSG00000175727.9	ZBTB7B	C2H2 ZF	ENSG00000160685.9	0.00809549	protein_coding	24.438	20.102	65.1258	protein_coding	38.3803	32.1952	21.9588
ZNF140	ENSG00000196387.5	NRF1	Unknown	ENSG00000106459.10	0.00829162	protein_coding	12.1101	19.1807	7.90798	protein_coding	7.55863	11.9829	6.05519
ZNF140	ENSG00000196387.5	NFATC2	Rel	ENSG00000101096.15	0.00767556	protein_coding	33.903	24.7075	33.2928	protein_coding	7.55863	11.9829	6.05519
ZNF140	ENSG00000196387.5	REL	Rel	ENSG00000162924.9	0.00709114	protein_coding	8.38764	216.888	56.7033	protein_coding	7.55863	11.9829	6.05519
ZNF140	ENSG00000196387.5	ZNF263	C2H2 ZF	ENSG00000006194.6	0.00711696	protein_coding	13.8496	19.5448	8.63775	protein_coding	7.55863	11.9829	6.05519
ZNF140	ENSG00000196387.5	ZNF281	C2H2 ZF	ENSG00000162702.7	0.01088	protein_coding	19.3751	26.911	17.9295	protein_coding	7.55863	11.9829	6.05519
ZNF140	ENSG00000196387.5	CTCF	C2H2 ZF	ENSG00000102974.10	0.0107642	protein_coding	50.6801	45.7903	69.2994	protein_coding	7.55863	11.9829	6.05519
ZNF140	ENSG00000196387.5	ELF4	Ets	ENSG00000102034.12	0.00920756	protein_coding	26.4618	20.1657	33.0515	protein_coding	7.55863	11.9829	6.05519
ZNF140	ENSG00000196387.5	SNAI1	C2H2 ZF	ENSG00000124216.3	0.00796113	protein_coding	1.30754	8.60721	3.42322	protein_coding	7.55863	11.9829	6.05519
ZNF140	ENSG00000196387.5	STAT5A	STAT	ENSG00000126561.12	0.00766274	protein_coding	36.4983	316.372	118.146	protein_coding	7.55863	11.9829	6.05519
ZNF140	ENSG00000196387.5	BACH1	bZIP	ENSG00000156273.11	0.00873585	protein_coding	15.2362	29.6887	9.70708	protein_coding	7.55863	11.9829	6.05519
ZNF140	ENSG00000196387.5	IKZF1	C2H2 ZF	ENSG00000185811.12	0.0130508	protein_coding	140.55	182.375	130.244	protein_coding	7.55863	11.9829	6.05519
ZNF140	ENSG00000196387.5	IRF1	IRF	ENSG00000125347.9	0.00700643	protein_coding	20.5275	150.134	102.101	protein_coding	7.55863	11.9829	6.05519
ZNF140	ENSG00000196387.5	FOSB	bZIP	ENSG00000125740.9	0.00854068	protein_coding	1.38153	14.6115	1.57442	protein_coding	7.55863	11.9829	6.05519
FOXO1	ENSG00000150907.6	POU2F2	Homeodomain,POU	ENSG00000028277.16	0.009429	protein_coding	15.7518	74.8209	53.1713	protein_coding	94.0816	55.3038	49.5386
FOXO1	ENSG00000150907.6	STAT1	STAT	ENSG00000115415.14	0.00922023	protein_coding	35.0834	445.774	430.889	protein_coding	94.0816	55.3038	49.5386
FOXO1	ENSG00000150907.6	IRF1	IRF	ENSG00000125347.9	0.0104022	protein_coding	20.5275	150.134	102.101	protein_coding	94.0816	55.3038	49.5386
FOXO1	ENSG00000150907.6	FOSL1	bZIP	ENSG00000175592.4	0.00807817	protein_coding	1.60479	151.689	60.6658	protein_coding	94.0816	55.3038	49.5386
FOXO1	ENSG00000150907.6	MAZ	C2H2 ZF	ENSG00000103495.9	0.00749442	protein_coding	71.6034	91.0371	189.127	protein_coding	94.0816	55.3038	49.5386
FOXO1	ENSG00000150907.6	ATF3	bZIP	ENSG00000162772.12	0.00724832	protein_coding	1.83901	12.5986	5.37156	protein_coding	94.0816	55.3038	49.5386
FOXO1	ENSG00000150907.6	GFI1	C2H2 ZF	ENSG00000162676.7	0.00726838	protein_coding	10.0452	202.356	83.9047	protein_coding	94.0816	55.3038	49.5386
FOXO1	ENSG00000150907.6	TCF7	Sox	ENSG00000081059.15	0.00820172	protein_coding	224.006	63.0622	58.9134	protein_coding	94.0816	55.3038	49.5386
FOXO1	ENSG00000150907.6	ZNF317	C2H2 ZF	ENSG00000130803.10	0.0115334	protein_coding	15.4262	29.4555	27.1963	protein_coding	94.0816	55.3038	49.5386
FOXO1	ENSG00000150907.6	TFAP4	bHLH	ENSG00000090447.7	0.0137652	protein_coding	6.44111	12.8682	14.9109	protein_coding	94.0816	55.3038	49.5386
FOXO1	ENSG00000150907.6	MAFG	bZIP	ENSG00000197063.6	0.0103647	protein_coding	5.59852	24.4516	19.1702	protein_coding	94.0816	55.3038	49.5386
FOXO1	ENSG00000150907.6	ZBTB18	C2H2 ZF	ENSG00000179456.9	0.00711079	protein_coding	104.724	28.3132	11.2869	protein_coding	94.0816	55.3038	49.5386
FOXO1	ENSG00000150907.6	RELA	Rel	ENSG00000173039.14	0.00807504	protein_coding	47.6368	71.7005	69.9761	protein_coding	94.0816	55.3038	49.5386
FOXO1	ENSG00000150907.6	E2F6	E2F	ENSG00000169016.12	0.00811077	protein_coding	2.84755	10.2704	6.21233	protein_coding	94.0816	55.3038	49.5386
FOXO1	ENSG00000150907.6	EGR2	C2H2 ZF	ENSG00000122877.9	0.00921316	protein_coding	2.12493	158.341	31.8664	protein_coding	94.0816	55.3038	49.5386
FOXO1	ENSG00000150907.6	AHR	bHLH	ENSG00000106546.8	0.00925581	protein_coding	9.41274	93.4629	53.6691	protein_coding	94.0816	55.3038	49.5386
FOXO1	ENSG00000150907.6	STAT5A	STAT	ENSG00000126561.12	0.00979918	protein_coding	36.4983	316.372	118.146	protein_coding	94.0816	55.3038	49.5386
FOXO1	ENSG00000150907.6	EGR3	C2H2 ZF	ENSG00000179388.8	0.00832765	protein_coding	1.35095	132.127	45.4685	protein_coding	94.0816	55.3038	49.5386
FOXO1	ENSG00000150907.6	THAP1	THAP finger	ENSG00000131931.4	0.00700578	protein_coding	10.3161	13.9612	18.6273	protein_coding	94.0816	55.3038	49.5386
FOXO1	ENSG00000150907.6	KLF10	C2H2 ZF	ENSG00000155090.10	0.0116517	protein_coding	2.98347	101.32	25.2161	protein_coding	94.0816	55.3038	49.5386
FOXO1	ENSG00000150907.6	KLF2	C2H2 ZF	ENSG00000127528.5	0.00749501	protein_coding	643.228	77.5309	3.57086	protein_coding	94.0816	55.3038	49.5386
FOXO1	ENSG00000150907.6	MYC	bHLH	ENSG00000136997.10	0.00922904	protein_coding	102.767	1095.75	648.817	protein_coding	94.0816	55.3038	49.5386
FOXO1	ENSG00000150907.6	RORA	Nuclear receptor	ENSG00000069667.11	0.0070592	protein_coding	23.2819	9.22455	1.52915	protein_coding	94.0816	55.3038	49.5386
FOXO1	ENSG00000150907.6	STAT6	STAT	ENSG00000166888.6	0.00700447	protein_coding	68.1825	167.043	162.319	protein_coding	94.0816	55.3038	49.5386
FOXO1	ENSG00000150907.6	SRF	MADS box	ENSG00000112658.6	0.00836171	protein_coding	15.4137	64.2775	80.8318	protein_coding	94.0816	55.3038	49.5386
FOXO1	ENSG00000150907.6	ESRRA	Nuclear receptor	ENSG00000173153.9	0.00959961	protein_coding	8.26157	35.9147	35.2063	protein_coding	94.0816	55.3038	49.5386
FOXO1	ENSG00000150907.6	TGIF2	Homeodomain	ENSG00000118707.5	0.00805612	protein_coding	18.8919	43.0823	46.8952	protein_coding	94.0816	55.3038	49.5386
FOXO1	ENSG00000150907.6	CENPB	CENPB	ENSG00000125817.7	0.00950794	protein_coding	34.4666	56.3655	92.0614	protein_coding	94.0816	55.3038	49.5386
FOXO1	ENSG00000150907.6	MTF1	C2H2 ZF	ENSG00000188786.9	0.00921874	protein_coding	10.1249	31.2324	26.6528	protein_coding	94.0816	55.3038	49.5386
FOXO1	ENSG00000150907.6	ZBTB14	C2H2 ZF	ENSG00000198081.6	0.00922443	protein_coding	22.0902	8.83913	14.8651	protein_coding	94.0816	55.3038	49.5386
ELF1	ENSG00000120690.9	FOXP3	Forkhead	ENSG00000049768.10	0.00837384	protein_coding	2.19489	3.42871	6.75386	protein_coding	72.2458	77.2599	48.5997
ELF1	ENSG00000120690.9	FOXO3	Forkhead	ENSG00000118689.10	0.00706792	protein_coding	9.87318	6.89084	3.15724	protein_coding	72.2458	77.2599	48.5997
ELF1	ENSG00000120690.9	EOMES	T-box	ENSG00000163508.8	0.00866396	protein_coding	5.25807	7.21463	1.02112	protein_coding	72.2458	77.2599	48.5997
ELF1	ENSG00000120690.9	BACH1	bZIP	ENSG00000156273.11	0.00703625	protein_coding	15.2362	29.6887	9.70708	protein_coding	72.2458	77.2599	48.5997
ELF1	ENSG00000120690.9	JUND	bZIP	ENSG00000130522.4	0.00799144	protein_coding	74.3572	109.809	180.846	protein_coding	72.2458	77.2599	48.5997
ELF1	ENSG00000120690.9	ELK1	Ets	ENSG00000126767.13	0.0112575	protein_coding	18.6585	40.6808	59.8587	protein_coding	72.2458	77.2599	48.5997
ELF1	ENSG00000120690.9	MAZ	C2H2 ZF	ENSG00000103495.9	0.00846515	protein_coding	71.6034	91.0371	189.127	protein_coding	72.2458	77.2599	48.5997
ELF1	ENSG00000120690.9	SP1	C2H2 ZF	ENSG00000185591.5	0.00746776	protein_coding	62.5147	64.2127	75.0785	protein_coding	72.2458	77.2599	48.5997
ELF1	ENSG00000120690.9	NRF1	Unknown	ENSG00000106459.10	0.00753659	protein_coding	12.1101	19.1807	7.90798	protein_coding	72.2458	77.2599	48.5997
ELF1	ENSG00000120690.9	RORA	Nuclear receptor	ENSG00000069667.11	0.0107777	protein_coding	23.2819	9.22455	1.52915	protein_coding	72.2458	77.2599	48.5997
ELF1	ENSG00000120690.9	E2F1	E2F	ENSG00000101412.9	0.00747176	protein_coding	3.27673	2.94519	105.532	protein_coding	72.2458	77.2599	48.5997
ELF1	ENSG00000120690.9	RUNX3	Runt	ENSG00000020633.14	0.0105738	protein_coding	47.4684	73.1236	109.548	protein_coding	72.2458	77.2599	48.5997
ELF1	ENSG00000120690.9	MEF2A	MADS box	ENSG00000068305.13	0.0123208	protein_coding	17.5747	16.3968	11.6467	protein_coding	72.2458	77.2599	48.5997
ELF1	ENSG00000120690.9	ZNF282	C2H2 ZF	ENSG00000170265.7	0.00838733	protein_coding	10.0338	13.1235	24.7383	protein_coding	72.2458	77.2599	48.5997
ELF1	ENSG00000120690.9	CTCF	C2H2 ZF	ENSG00000102974.10	0.00739325	protein_coding	50.6801	45.7903	69.2994	protein_coding	72.2458	77.2599	48.5997
ELF1	ENSG00000120690.9	CREB3	bZIP	ENSG00000107175.6	0.00902325	protein_coding	9.17368	6.9742	14.5769	protein_coding	72.2458	77.2599	48.5997
ELF1	ENSG00000120690.9	THAP11	THAP finger	ENSG00000168286.1	0.0079585	protein_coding	44.1418	46.0762	84.2597	protein_coding	72.2458	77.2599	48.5997
[truncated: 1,406 more rows]

## Sheet: tf enrichment
rank	target	id	raw.score	p.value	top.motif.prop	fdr	piq_name	TF	gene_name	gene_id	TF_family	enrichment_name	consensus	pwm_enriched_cluster	cluster
1	MA1515.1	MA1515.1	5.11543	1.70406e-267	0.115932	1.27123e-264	MA15151	KLF2	KLF2	ENSG00000127528	C2H2 ZF	MA1515.1	NA	cluster_1_contacting_ocrs	4
2	MA0006.1	MA0006.1	0.767015	4.70102e-244	0.114318	1.75348e-241	MA00061	Ahr::Arnt	AHR	ENSG00000106546	bHLH	MA0006.1	NA	cluster_1_contacting_ocrs	1
2	MA0006.1	MA0006.1	0.767015	4.70102e-244	0.114318	1.75348e-241	MA00061	Ahr::Arnt	ARNT	ENSG00000143437	bHLH	MA0006.1	NA	cluster_1_contacting_ocrs	5
3	MA0599.1	MA0599.1	14.5828	2.44919e-229	0.114603	6.09031e-227	MA05991	KLF5	KLF5	ENSG00000102554	C2H2 ZF	MA0599.1	NA	cluster_1_contacting_ocrs	not_differential
4	MA0597.1	MA0597.1	1.55555	1.09164e-197	0.108954	2.03592e-195	MA05971	THAP1	THAP1	ENSG00000131931	THAP finger	MA0597.1	NA	cluster_1_contacting_ocrs	3
5	MA0765.2	MA0765.2	1.87456	7.39641e-188	0.0869256	1.10354e-185	MA07652	ETV5	ETV5	ENSG00000244405	Ets	MA0765.2	NA	cluster_1_contacting_ocrs	not_differential
6	MA0259.1	MA0259.1	0.685669	5.61896e-177	0.108052	6.98624e-175	MA02591	ARNT::HIF1A	ARNT	ENSG00000143437	bHLH	MA0259.1	NA	cluster_1_contacting_ocrs	5
6	MA0259.1	MA0259.1	0.685669	5.61896e-177	0.108052	6.98624e-175	MA02591	ARNT::HIF1A	HIF1A	ENSG00000100644	bHLH	MA0259.1	NA	cluster_1_contacting_ocrs	1
7	MA0615.1	MA0615.1	0.343304	2.32176e-170	0.0915306	2.47434e-168	MA06151	Gmeb1	GMEB1	ENSG00000162419	SAND	MA0615.1	NA	cluster_1_contacting_ocrs	1
8	MA0039.4	MA0039.4	9.99123	6.79812e-164	0.112514	6.33925e-162	MA00394	KLF4	KLF4	ENSG00000136826	C2H2 ZF	MA0039.4	NA	cluster_1_contacting_ocrs	not_differential
9	MA1513.1	MA1513.1	32.1603	3.01671e-158	0.0958507	2.50052e-156	MA15131	KLF15	KLF15	ENSG00000163884	C2H2 ZF	MA1513.1	NA	cluster_1_contacting_ocrs	not_differential
10	MA1564.1	MA1564.1	8.52074	3.01038e-150	0.0909134	2.24574e-148	MA15641	SP9	SP9	ENSG00000217236	C2H2 ZF	MA1564.1	NA	cluster_1_contacting_ocrs	not_differential
11	MA1569.1	MA1569.1	3.53591	1.02892e-149	0.114081	6.97797e-148	MA15691	TFAP2E	TFAP2E	ENSG00000116819	AP-2	MA1569.1	NA	cluster_1_contacting_ocrs	not_differential
12	MA1122.1	MA1122.1	2.45991	2.30878e-141	0.079567	1.43529e-139	MA11221	TFDP1	TFDP1	ENSG00000198176	E2F	MA1122.1	NA	cluster_1_contacting_ocrs	5
13	MA0471.2	MA0471.2	5.15502	1.02347e-134	0.08327	5.87315e-133	MA04712	E2F6	E2F6	ENSG00000169016	E2F	MA0471.2	NA	cluster_1_contacting_ocrs	1
14	MA0741.1	MA0741.1	12.2363	1.19771e-131	0.089774	6.38211e-130	MA07411	KLF16	KLF16	ENSG00000129911	C2H2 ZF	MA0741.1	NA	cluster_1_contacting_ocrs	3
15	MA0810.1	MA0810.1	3.31664	1.48865e-113	0.0921003	7.40357e-112	MA08101	TFAP2A(var.2)	TFAP2A	ENSG00000137203	AP-2	MA0810.1	NA	cluster_1_contacting_ocrs	2
16	MA1517.1	MA1517.1	3.71958	4.45694e-111	0.0872104	2.07805e-109	MA15171	KLF6	KLF6	ENSG00000067082	C2H2 ZF	MA1517.1	NA	cluster_1_contacting_ocrs	not_differential
17	MA0146.2	MA0146.2	8.44933	8.46198e-110	0.0933346	3.71332e-108	MA01462	Zfx	ZFX	ENSG00000005889	C2H2 ZF	MA0146.2	NA	cluster_1_contacting_ocrs	not_differential
18	MA1522.1	MA1522.1	14.5109	3.11425e-108	0.104586	1.29068e-106	MA15221	MAZ	MAZ	ENSG00000103495	C2H2 ZF	MA1522.1	NA	cluster_1_contacting_ocrs	5
19	MA1099.2	MA1099.2	1.37066	4.99729e-104	0.0834125	1.96209e-102	MA10992	HES1	HES1	ENSG00000114315	bHLH	MA1099.2	NA	cluster_1_contacting_ocrs	not_differential
20	MA0750.2	MA0750.2	3.19333	2.68701e-102	0.0751044	1.00225e-100	MA07502	ZBTB7A	ZBTB7A	ENSG00000178951	C2H2 ZF	MA0750.2	NA	cluster_1_contacting_ocrs	not_differential
21	MA0076.2	MA0076.2	2.86982	4.90635e-94	0.0848367	1.74292e-92	MA00762	ELK4	ELK4	ENSG00000158711	Ets	MA0076.2	NA	cluster_1_contacting_ocrs	not_differential
22	MA0748.2	MA0748.2	1.63587	2.42097e-93	0.0708792	8.20929e-92	MA07482	YY2	YY2	ENSG00000230797	C2H2 ZF	MA0748.2	NA	cluster_1_contacting_ocrs	not_differential
23	MA0747.1	MA0747.1	6.54353	6.35495e-88	0.0801367	2.06121e-86	MA07471	SP8	SP8	ENSG00000164651	C2H2 ZF	MA0747.1	NA	cluster_1_contacting_ocrs	not_differential
24	MA0057.1	MA0057.1	1.82548	1.40469e-81	0.0874478	4.36625e-80	MA00571	MZF1(var.2)	MZF1	ENSG00000099326	C2H2 ZF	MA0057.1	NA	cluster_1_contacting_ocrs	not_differential
25	MA1578.1	MA1578.1	1.97696	1.35252e-80	0.0881599	4.03593e-79	MA15781	VEZF1	VEZF1	ENSG00000136451	C2H2 ZF	MA1578.1	NA	cluster_1_contacting_ocrs	not_differential
26	MA0814.2	MA0814.2	3.96914	9.75078e-79	0.0794246	2.79772e-77	MA08142	TFAP2C(var.2)	TFAP2C	ENSG00000087510	AP-2	MA0814.2	NA	cluster_1_contacting_ocrs	not_differential
27	MA1512.1	MA1512.1	6.91873	4.62116e-77	0.0773357	1.27681e-75	MA15121	KLF11	KLF11	ENSG00000172059	C2H2 ZF	MA1512.1	NA	cluster_1_contacting_ocrs	3
28	MA1653.1	MA1653.1	25.5973	1.48826e-75	0.0746297	3.96515e-74	MA16531	ZNF148	ZNF148	ENSG00000163848	NA	MA1653.1	NA	cluster_1_contacting_ocrs	not_differential
29	MA1548.1	MA1548.1	2.91348	1.61387e-74	0.0914356	4.15154e-73	MA15481	PLAGL2	PLAGL2	ENSG00000126003	C2H2 ZF	MA1548.1	NA	cluster_1_contacting_ocrs	3
30	MA0695.1	MA0695.1	1.28771	2.38727e-74	0.075057	5.93636e-73	MA06951	ZBTB7C	ZBTB7C	ENSG00000184828	C2H2 ZF	MA0695.1	NA	cluster_1_contacting_ocrs	2
31	MA0632.2	MA0632.2	1.67283	3.3126e-74	0.0701671	7.9716e-73	MA06322	TCFL5	TCFL5	ENSG00000101190	bHLH	MA0632.2	NA	cluster_1_contacting_ocrs	not_differential
32	MA0645.1	MA0645.1	2.03183	1.20846e-72	0.0849791	2.81723e-71	MA06451	ETV6	ETV6	ENSG00000139083	Ets	MA0645.1	NA	cluster_1_contacting_ocrs	not_differential
33	MA0162.4	MA0162.4	8.49129	5.86131e-69	0.0762438	1.32501e-67	MA01624	EGR1	EGR1	ENSG00000120738	C2H2 ZF	MA0162.4	NA	cluster_1_contacting_ocrs	1
34	MA0156.2	MA0156.2	1.16651	4.12564e-68	0.0798994	9.05214e-67	MA01562	FEV	FEV	ENSG00000163497	Ets	MA0156.2	NA	cluster_1_contacting_ocrs	2
35	MA0759.1	MA0759.1	1.21714	3.6435e-67	0.0742974	7.76586e-66	MA07591	ELK3	ELK3	ENSG00000111145	Ets	MA0759.1	NA	cluster_1_contacting_ocrs	1
36	MA0474.2	MA0474.2	1.29835	6.9771e-66	0.0836973	1.44581e-64	MA04742	ERG	ERG	ENSG00000157554	Ets	MA0474.2	NA	cluster_1_contacting_ocrs	2
37	MA0746.2	MA0746.2	12.8926	1.03699e-65	0.0709742	2.09079e-64	MA07462	SP3	SP3	ENSG00000172845	C2H2 ZF	MA0746.2	NA	cluster_1_contacting_ocrs	not_differential
38	MA0528.2	MA0528.2	7.47086	3.13186e-64	0.0943316	6.14834e-63	MA05282	ZNF263	ZNF263	ENSG00000006194	C2H2 ZF	MA0528.2	NA	cluster_1_contacting_ocrs	not_differential
39	MA1648.1	MA1648.1	2.62514	6.07417e-63	0.098082	1.16188e-61	MA16481	TCF12(var.2)	TCF12	ENSG00000140262	bHLH	MA1648.1	NA	cluster_1_contacting_ocrs	not_differential
40	MA0506.1	MA0506.1	9.71746	9.42905e-62	0.0540258	1.75852e-60	MA05061	NRF1	NRF1	ENSG00000106459	Unknown	MA0506.1	NA	cluster_1_contacting_ocrs	not_differential
41	MA1650.1	MA1650.1	3.6158	2.9965e-61	0.0708792	5.45216e-60	MA16501	ZBTB14	ZBTB14	ENSG00000198081	C2H2 ZF	MA1650.1	NA	cluster_1_contacting_ocrs	4
42	MA0098.3	MA0098.3	1.45321	2.96428e-60	0.0843619	5.26512e-59	MA00983	ETS1	ETS1	ENSG00000134954	Ets	MA0098.3	NA	cluster_1_contacting_ocrs	4
43	MA0004.1	MA0004.1	0.787294	1.88006e-57	0.0925275	3.26169e-56	MA00041	Arnt	ARNT	ENSG00000143437	bHLH	MA0004.1	NA	cluster_1_contacting_ocrs	5
44	MA1106.1	MA1106.1	0.519537	1.987e-57	0.0826529	3.36887e-56	MA11061	HIF1A	HIF1A	ENSG00000100644	bHLH	MA1106.1	NA	cluster_1_contacting_ocrs	1
45	MA0131.2	MA0131.2	1.42486	4.15498e-57	0.0704045	6.88804e-56	MA01312	HINFP	HINFP	ENSG00000172273	C2H2 ZF	MA0131.2	NA	cluster_1_contacting_ocrs	not_differential
46	MA0524.2	MA0524.2	2.86972	1.21443e-53	0.0779054	1.96948e-52	MA05242	TFAP2C	TFAP2C	ENSG00000087510	AP-2	MA0524.2	NA	cluster_1_contacting_ocrs	not_differential
47	MA1484.1	MA1484.1	1.34102	2.55107e-52	0.07876	4.04915e-51	MA14841	ETS2	ETS2	ENSG00000157557	Ets	MA1484.1	NA	cluster_1_contacting_ocrs	1
48	MA1102.2	MA1102.2	7.13727	1.25684e-51	0.0757691	1.95333e-50	MA11022	CTCFL	CTCFL	ENSG00000124092	C2H2 ZF	MA1102.2	NA	cluster_1_contacting_ocrs	not_differential
49	MA0811.1	MA0811.1	2.89062	4.54361e-51	0.0768135	6.91742e-50	MA08111	TFAP2B	TFAP2B	ENSG00000008196	AP-2	MA0811.1	NA	cluster_1_contacting_ocrs	not_differential
50	MA0604.1	MA0604.1	0.31857	8.47685e-51	0.0855963	1.26475e-49	MA06041	Atf1	ATF1	ENSG00000123268	bZIP	MA0604.1	NA	cluster_1_contacting_ocrs	1
51	MA1583.1	MA1583.1	0.72438	1.4265e-48	0.0626662	2.0866e-47	MA15831	ZFP57	ZFP57	ENSG00000204644	C2H2 ZF	MA1583.1	NA	cluster_1_contacting_ocrs	not_differential
52	MA0522.3	MA0522.3	2.5848	6.37021e-48	0.0974174	9.13881e-47	MA05223	TCF3	TCF3	ENSG00000071564	bHLH	MA0522.3	NA	cluster_1_contacting_ocrs	3
53	MA1615.1	MA1615.1	4.01065	6.30795e-46	0.0742499	8.87873e-45	MA16151	Plagl1	PLAGL1	ENSG00000118495	C2H2 ZF	MA1615.1	NA	cluster_1_contacting_ocrs	3
54	MA0147.3	MA0147.3	1.44493	2.68483e-43	0.0589157	3.70904e-42	MA01473	MYC	MYC	ENSG00000136997	bHLH	MA0147.3	NA	cluster_1_contacting_ocrs	1
55	MA1516.1	MA1516.1	4.15003	9.21972e-43	0.0572541	1.25053e-41	MA15161	KLF3	KLF3	ENSG00000109787	C2H2 ZF	MA1516.1	NA	cluster_1_contacting_ocrs	4
56	MA0763.1	MA0763.1	1.20018	2.82554e-42	0.0640429	3.76402e-41	MA07631	ETV3	ETV3	ENSG00000117036	Ets	MA0763.1	NA	cluster_1_contacting_ocrs	not_differential
57	MA0475.2	MA0475.2	1.34347	3.58821e-40	0.0691227	4.69614e-39	MA04752	FLI1	FLI1	ENSG00000151702	Ets	MA0475.2	NA	cluster_1_contacting_ocrs	4
58	MA0136.2	MA0136.2	1.80253	1.39111e-39	0.083365	1.78925e-38	MA01362	ELF5	ELF5	ENSG00000135374	Ets	MA0136.2	NA	cluster_1_contacting_ocrs	not_differential
59	MA0103.3	MA0103.3	2.54072	2.92556e-38	0.106532	3.6991e-37	MA01033	ZEB1	ZEB1	ENSG00000148516	C2H2 ZF,Homeodomain	MA0103.3	NA	cluster_1_contacting_ocrs	not_differential
60	MA1511.1	MA1511.1	5.03929	5.23356e-38	0.0673661	6.50706e-37	MA15111	KLF10	KLF10	ENSG00000155090	C2H2 ZF	MA1511.1	NA	cluster_1_contacting_ocrs	1
61	MA1627.1	MA1627.1	14.5136	1.19539e-37	0.0650874	1.4619e-36	MA16271	Wt1	WT1	ENSG00000184937	C2H2 ZF	MA1627.1	NA	cluster_1_contacting_ocrs	not_differential
62	MA1566.1	MA1566.1	1.12293	8.95055e-37	0.0745822	1.07695e-35	MA15661	TBX3	TBX3	ENSG00000135111	T-box	MA1566.1	NA	cluster_1_contacting_ocrs	2
63	MA0014.3	MA0014.3	0.939749	1.56933e-35	0.0600076	1.85829e-34	MA00143	PAX5	PAX5	ENSG00000196092	Paired box	MA0014.3	NA	cluster_1_contacting_ocrs	not_differential
64	MA0760.1	MA0760.1	1.50918	1.58119e-34	0.0710216	1.84307e-33	MA07601	ERF	ERF	ENSG00000105722	Ets	MA0760.1	NA	cluster_1_contacting_ocrs	3
65	MA0603.1	MA0603.1	0.867829	3.71766e-34	0.055545	4.26673e-33	MA06031	Arntl	ARNTL	ENSG00000133794	bHLH	MA0603.1	NA	cluster_1_contacting_ocrs	4
66	MA0622.1	MA0622.1	0.87035	8.20001e-31	0.0901063	9.2685e-30	MA06221	Mlxip	MLXIP	ENSG00000175727	bHLH	MA0622.1	NA	cluster_1_contacting_ocrs	not_differential
67	MA0028.2	MA0028.2	1.62585	1.06313e-30	0.0481865	1.18373e-29	MA00282	ELK1	ELK1	ENSG00000126767	Ets	MA0028.2	NA	cluster_1_contacting_ocrs	3
68	MA1474.1	MA1474.1	0.831081	1.1721e-29	0.0615742	1.28443e-28	MA14741	CREB3L4	CREB3L4	ENSG00000143578	bZIP	MA1474.1	NA	cluster_1_contacting_ocrs	not_differential
69	MA0812.1	MA0812.1	3.04954	1.18801e-29	0.0707368	1.28443e-28	MA08121	TFAP2B(var.2)	TFAP2B	ENSG00000008196	AP-2	MA0812.1	NA	cluster_1_contacting_ocrs	not_differential
70	MA0825.1	MA0825.1	0.880823	2.77223e-28	0.0735853	2.95441e-27	MA08251	MNT	MNT	ENSG00000070444	bHLH	MA0825.1	NA	cluster_1_contacting_ocrs	not_differential
71	MA1464.1	MA1464.1	1.01518	4.32606e-28	0.0511774	4.54541e-27	MA14641	ARNT2	ARNT2	ENSG00000172379	bHLH	MA1464.1	NA	cluster_1_contacting_ocrs	2
72	MA0830.2	MA0830.2	3.07811	9.62249e-28	0.0774307	9.96997e-27	MA08302	TCF4	TCF4	ENSG00000196628	bHLH	MA0830.2	NA	cluster_1_contacting_ocrs	2
73	MA0058.3	MA0058.3	0.950659	8.62715e-26	0.0715913	8.81624e-25	MA00583	MAX	MAX	ENSG00000125952	bHLH	MA0058.3	NA	cluster_1_contacting_ocrs	not_differential
74	MA0464.2	MA0464.2	0.954327	2.17183e-22	0.0401633	2.18944e-21	MA04642	BHLHE40	BHLHE40	ENSG00000134107	bHLH	MA0464.2	NA	cluster_1_contacting_ocrs	3
75	MA0740.1	MA0740.1	8.25838	2.7878e-21	0.0451481	2.77293e-20	MA07401	KLF14	KLF14	ENSG00000266265	C2H2 ZF	MA0740.1	NA	cluster_1_contacting_ocrs	not_differential
76	MA0104.4	MA0104.4	1.71311	2.1825e-20	0.0526016	2.14229e-19	MA01044	MYCN	MYCN	ENSG00000134323	bHLH	MA0104.4	NA	cluster_1_contacting_ocrs	not_differential
77	MA0003.4	MA0003.4	3.32367	2.61109e-20	0.0699772	2.52971e-19	MA00034	TFAP2A	TFAP2A	ENSG00000137203	AP-2	MA0003.4	NA	cluster_1_contacting_ocrs	2
78	MA0616.2	MA0616.2	1.24503	3.47392e-20	0.0535036	3.32249e-19	MA06162	HES2	HES2	ENSG00000069812	bHLH	MA0616.2	NA	cluster_1_contacting_ocrs	not_differential
79	MA0831.2	MA0831.2	0.881801	9.6433e-20	0.0665591	9.10621e-19	MA08312	TFE3	TFE3	ENSG00000068323	bHLH	MA0831.2	NA	cluster_1_contacting_ocrs	5
80	MA0079.4	MA0079.4	24.8995	2.15153e-19	0.0345139	2.00631e-18	MA00794	SP1	SP1	ENSG00000185591	C2H2 ZF	MA0079.4	NA	cluster_1_contacting_ocrs	not_differential
81	MA0733.1	MA0733.1	2.1751	4.75099e-19	0.0673186	4.3756e-18	MA07331	EGR4	EGR4	ENSG00000135625	C2H2 ZF	MA0733.1	NA	cluster_1_contacting_ocrs	1
82	MA0767.1	MA0767.1	0.735835	7.22743e-19	0.0642328	6.5752e-18	MA07671	GCM2	GCM2	ENSG00000124827	GCM	MA0767.1	NA	cluster_1_contacting_ocrs	not_differential
83	MA1560.1	MA1560.1	0.826877	9.72396e-19	0.0542157	8.73985e-18	MA15601	SOHLH2	SOHLH2	ENSG00000120669	bHLH	MA1560.1	NA	cluster_1_contacting_ocrs	not_differential
84	MA0823.1	MA0823.1	1.06068	1.49083e-18	0.0540258	1.324e-17	MA08231	HEY1	HEY1	ENSG00000164683	bHLH	MA0823.1	NA	cluster_1_contacting_ocrs	not_differential
85	MA0095.2	MA0095.2	4.85441	2.05328e-18	0.0483289	1.80205e-17	MA00952	YY1	YY1	ENSG00000100811	C2H2 ZF	MA0095.2	NA	cluster_1_contacting_ocrs	not_differential
86	MA0871.2	MA0871.2	1.239	2.53167e-18	0.0345139	2.19608e-17	MA08712	TFEC	TFEC	ENSG00000105967	bHLH	MA0871.2	NA	cluster_1_contacting_ocrs	2
87	MA1554.1	MA1554.1	0.682762	4.47715e-18	0.0781903	3.83902e-17	MA15541	RFX7	RFX7	ENSG00000181827	RFX	MA1554.1	NA	cluster_1_contacting_ocrs	not_differential
88	MA0692.1	MA0692.1	1.21526	7.86175e-18	0.0612894	6.66462e-17	MA06921	TFEB	TFEB	ENSG00000112561	bHLH	MA0692.1	NA	cluster_1_contacting_ocrs	3
89	MA0608.1	MA0608.1	0.888951	1.2895e-17	0.0547854	1.08086e-16	MA06081	Creb3l2	CREB3L2	ENSG00000182158	bZIP	MA0608.1	NA	cluster_1_contacting_ocrs	3
90	MA1631.1	MA1631.1	3.59954	5.39107e-17	0.0744873	4.4686e-16	MA16311	ASCL1(var.2)	ASCL1	ENSG00000139352	bHLH	MA1631.1	NA	cluster_1_contacting_ocrs	not_differential
91	MA0155.1	MA0155.1	2.5029	6.35262e-17	0.0694075	5.20775e-16	MA01551	INSM1	INSM1	ENSG00000173404	C2H2 ZF	MA0155.1	NA	cluster_1_contacting_ocrs	not_differential
92	MA1535.1	MA1535.1	1.10948	3.21933e-16	0.0962305	2.61046e-15	MA15351	NR2C1	NR2C1	ENSG00000120798	Nuclear receptor	MA1535.1	NA	cluster_1_contacting_ocrs	not_differential
93	MA1475.1	MA1475.1	1.30614	3.66673e-16	0.0474269	2.94127e-15	MA14751	CREB3L4(var.2)	CREB3L4	ENSG00000143578	bZIP	MA1475.1	NA	cluster_1_contacting_ocrs	not_differential
94	MA1630.1	MA1630.1	10.7889	4.03911e-16	0.0554501	3.20551e-15	MA16301	Znf281	ZNF281	ENSG00000162702	C2H2 ZF	MA1630.1	NA	cluster_1_contacting_ocrs	not_differential
95	MA1536.1	MA1536.1	0.973936	4.13642e-16	0.0748671	3.24818e-15	MA15361	NR2C2(var.2)	NR2C2	ENSG00000177463	Nuclear receptor	MA1536.1	NA	cluster_1_contacting_ocrs	not_differential
96	MA0649.1	MA0649.1	1.00098	4.67935e-16	0.0486137	3.63625e-15	MA06491	HEY2	HEY2	ENSG00000135547	bHLH	MA0649.1	NA	cluster_1_contacting_ocrs	2
97	MA0764.2	MA0764.2	4.32112	9.37909e-15	0.123148	7.21319e-14	MA07642	ETV4	ETV4	ENSG00000175832	Ets	MA0764.2	NA	cluster_1_contacting_ocrs	not_differential
98	MA0862.1	MA0862.1	0.247304	2.47503e-14	0.0561622	1.88405e-13	MA08621	GMEB2	GMEB2	ENSG00000101216	SAND	MA0862.1	NA	cluster_1_contacting_ocrs	not_differential
99	MA1628.1	MA1628.1	3.37922	4.69669e-14	0.103684	3.53912e-13	MA16281	Zic1::Zic2	ZIC1	ENSG00000152977	C2H2 ZF	MA1628.1	NA	cluster_1_contacting_ocrs	not_differential
99	MA1628.1	MA1628.1	3.37922	4.69669e-14	0.103684	3.53912e-13	MA16281	Zic1::Zic2	ZIC2	ENSG00000043355	C2H2 ZF	MA1628.1	NA	cluster_1_contacting_ocrs	not_differential
100	MA0101.1	MA0101.1	1.38216	1.50684e-13	0.0743923	1.1241e-12	MA01011	REL	REL	ENSG00000162924	Rel	MA0101.1	NA	cluster_1_contacting_ocrs	1
101	MA0762.1	MA0762.1	1.22155	2.25459e-13	0.0661793	1.66527e-12	MA07621	ETV2	ETV2	ENSG00000105672	Ets	MA0762.1	NA	cluster_1_contacting_ocrs	not_differential
102	MA0626.1	MA0626.1	0.866505	2.36761e-13	0.0739176	1.7316e-12	MA06261	Npas2	NPAS2	ENSG00000170485	bHLH	MA0626.1	NA	cluster_1_contacting_ocrs	3
103	MA0609.2	MA0609.2	2.2033	4.88234e-13	0.0447683	3.53614e-12	MA06092	CREM	CREM	ENSG00000095794	bZIP	MA0609.2	NA	cluster_1_contacting_ocrs	1
104	MA0686.1	MA0686.1	0.687421	3.06189e-12	0.0540733	2.19632e-11	MA06861	SPDEF	SPDEF	ENSG00000124664	Ets	MA0686.1	NA	cluster_1_contacting_ocrs	not_differential
105	MA0493.1	MA0493.1	4.07034	6.26085e-12	0.0704994	4.44818e-11	MA04931	Klf1	KLF1	ENSG00000105610	C2H2 ZF	MA0493.1	NA	cluster_1_contacting_ocrs	not_differential
106	MA1136.1	MA1136.1	0.962231	1.7634e-11	0.047142	1.24104e-10	MA11361	FOSB::JUNB(var.2)	FOSB	ENSG00000125740	bZIP	MA1136.1	NA	cluster_1_contacting_ocrs	1
106	MA1136.1	MA1136.1	0.962231	1.7634e-11	0.047142	1.24104e-10	MA11361	FOSB::JUNB(var.2)	JUNB	ENSG00000171223	bZIP	MA1136.1	NA	cluster_1_contacting_ocrs	1
107	MA1133.1	MA1133.1	0.9551	2.01374e-11	0.0516046	1.40398e-10	MA11331	JUN::JUNB(var.2)	JUN	ENSG00000177606	bZIP	MA1133.1	NA	cluster_1_contacting_ocrs	2
107	MA1133.1	MA1133.1	0.9551	2.01374e-11	0.0516046	1.40398e-10	MA11331	JUN::JUNB(var.2)	JUNB	ENSG00000171223	bZIP	MA1133.1	NA	cluster_1_contacting_ocrs	1
108	MA0753.2	MA0753.2	8.91041	2.54725e-11	0.0436289	1.75949e-10	MA07532	ZNF740	ZNF740	ENSG00000139651	C2H2 ZF	MA0753.2	NA	cluster_1_contacting_ocrs	not_differential
109	MA0636.1	MA0636.1	1.95331	2.79373e-11	0.0174231	1.91204e-10	MA06361	BHLHE41	BHLHE41	ENSG00000123095	bHLH	MA0636.1	NA	cluster_1_contacting_ocrs	not_differential
110	MA0472.2	MA0472.2	1.63635	2.87509e-11	0.0523642	1.94984e-10	MA04722	EGR2	EGR2	ENSG00000122877	C2H2 ZF	MA0472.2	NA	cluster_1_contacting_ocrs	1
111	MA1131.1	MA1131.1	1.2233	4.80743e-11	0.0471895	3.23094e-10	MA11311	FOSL2::JUN(var.2)	FOSL2	ENSG00000075426	bZIP	MA1131.1	NA	cluster_1_contacting_ocrs	1
111	MA1131.1	MA1131.1	1.2233	4.80743e-11	0.0471895	3.23094e-10	MA11311	FOSL2::JUN(var.2)	JUN	ENSG00000177606	bZIP	MA1131.1	NA	cluster_1_contacting_ocrs	2
112	MA0685.1	MA0685.1	31.55	4.92385e-11	0.0295291	3.27964e-10	MA06851	SP4	SP4	ENSG00000105866	C2H2 ZF	MA0685.1	NA	cluster_1_contacting_ocrs	not_differential
113	MA0664.1	MA0664.1	0.782998	5.19988e-11	0.0479491	3.43284e-10	MA06641	MLXIPL	MLXIPL	ENSG00000009950	bHLH	MA0664.1	NA	cluster_1_contacting_ocrs	not_differential
114	MA1483.1	MA1483.1	1.94005	3.09343e-10	0.0413027	2.02429e-09	MA14831	ELF2	ELF2	ENSG00000109381	Ets	MA1483.1	NA	cluster_1_contacting_ocrs	not_differential
115	MA1139.1	MA1139.1	1.31576	4.44641e-10	0.0404956	2.88437e-09	MA11391	FOSL2::JUNB(var.2)	FOSL2	ENSG00000075426	bZIP	MA1139.1	NA	cluster_1_contacting_ocrs	1
115	MA1139.1	MA1139.1	1.31576	4.44641e-10	0.0404956	2.88437e-09	MA11391	FOSL2::JUNB(var.2)	JUNB	ENSG00000171223	bZIP	MA1139.1	NA	cluster_1_contacting_ocrs	1
116	MA1127.1	MA1127.1	1.20816	5.78529e-10	0.0445784	3.72054e-09	MA11271	FOSB::JUN	FOSB	ENSG00000125740	bZIP	MA1127.1	NA	cluster_1_contacting_ocrs	1
116	MA1127.1	MA1127.1	1.20816	5.78529e-10	0.0445784	3.72054e-09	MA11271	FOSB::JUN	JUN	ENSG00000177606	bZIP	MA1127.1	NA	cluster_1_contacting_ocrs	2
117	MA1145.1	MA1145.1	1.42712	7.61569e-10	0.0425845	4.85582e-09	MA11451	FOSL2::JUND(var.2)	FOSL2	ENSG00000075426	bZIP	MA1145.1	NA	cluster_1_contacting_ocrs	1
117	MA1145.1	MA1145.1	1.42712	7.61569e-10	0.0425845	4.85582e-09	MA11451	FOSL2::JUND(var.2)	JUND	ENSG00000130522	bZIP	MA1145.1	NA	cluster_1_contacting_ocrs	3
118	MA1596.1	MA1596.1	2464.28	1.23461e-09	0.038929	7.80523e-09	MA15961	ZNF460	ZNF460	ENSG00000197714	C2H2 ZF	MA1596.1	NA	cluster_1_contacting_ocrs	1
119	MA0751.1	MA0751.1	2.09218	2.04854e-09	0.0668439	1.28421e-08	MA07511	ZIC4	ZIC4	ENSG00000174963	C2H2 ZF	MA0751.1	NA	cluster_1_contacting_ocrs	not_differential
120	MA1656.1	MA1656.1	2.16774	4.02636e-09	0.0624763	2.50306e-08	MA16561	ZNF449	ZNF449	ENSG00000173275	C2H2 ZF	MA1656.1	NA	cluster_1_contacting_ocrs	4
121	MA0872.1	MA0872.1	3.68428	5.21998e-09	0.0614793	3.21827e-08	MA08721	TFAP2A(var.3)	TFAP2A	ENSG00000137203	AP-2	MA0872.1	NA	cluster_1_contacting_ocrs	2
122	MA1129.1	MA1129.1	0.832472	5.59686e-09	0.0494683	3.42234e-08	MA11291	FOSL1::JUN(var.2)	FOSL1	ENSG00000175592	bZIP	MA1129.1	NA	cluster_1_contacting_ocrs	1
122	MA1129.1	MA1129.1	0.832472	5.59686e-09	0.0494683	3.42234e-08	MA11291	FOSL1::JUN(var.2)	JUN	ENSG00000177606	bZIP	MA1129.1	NA	cluster_1_contacting_ocrs	2
123	MA0732.1	MA0732.1	3.46186	5.95297e-09	0.0395461	3.6105e-08	MA07321	EGR3	EGR3	ENSG00000179388	C2H2 ZF	MA0732.1	NA	cluster_1_contacting_ocrs	1
124	MA0813.1	MA0813.1	3.39355	1.49265e-08	0.06015	8.97998e-08	MA08131	TFAP2B(var.3)	TFAP2B	ENSG00000008196	AP-2	MA0813.1	NA	cluster_1_contacting_ocrs	not_differential
125	MA0605.2	MA0605.2	2.56719	1.75315e-08	0.0158564	1.04628e-07	MA06052	ATF3	ATF3	ENSG00000162772	bZIP	MA0605.2	NA	cluster_1_contacting_ocrs	1
126	MA0694.1	MA0694.1	0.779878	2.7009e-08	0.0627136	1.5991e-07	MA06941	ZBTB7B	ZBTB7B	ENSG00000160685	C2H2 ZF	MA0694.1	NA	cluster_1_contacting_ocrs	5
127	MA0815.1	MA0815.1	3.7841	2.99914e-08	0.0596753	1.7617e-07	MA08151	TFAP2C(var.3)	TFAP2C	ENSG00000087510	AP-2	MA0815.1	NA	cluster_1_contacting_ocrs	not_differential
128	MA1637.1	MA1637.1	2.2974	4.40833e-08	0.0679358	2.56923e-07	MA16371	EBF3	EBF3	ENSG00000108001	EBF1	MA1637.1	NA	cluster_1_contacting_ocrs	not_differential
129	MA0742.1	MA0742.1	3.38093	4.68891e-08	0.0384542	2.71157e-07	MA07421	Klf12	KLF12	ENSG00000118922	C2H2 ZF	MA0742.1	NA	cluster_1_contacting_ocrs	4
130	MA0516.2	MA0516.2	22.1514	6.79414e-08	0.0382643	3.89879e-07	MA05162	SP2	SP2	ENSG00000167182	C2H2 ZF	MA0516.2	NA	cluster_1_contacting_ocrs	1
131	MA0048.2	MA0048.2	2.98647	1.45572e-07	0.0578238	8.28983e-07	MA00482	NHLH1	NHLH1	ENSG00000171786	bHLH	MA0048.2	NA	cluster_1_contacting_ocrs	not_differential
132	MA0864.2	MA0864.2	0.463844	2.36175e-07	0.0560672	1.33475e-06	MA08642	E2F2	E2F2	ENSG00000007968	E2F	MA0864.2	NA	cluster_1_contacting_ocrs	5
133	MA0641.1	MA0641.1	2.32409	2.41114e-07	0.0392613	1.35241e-06	MA06411	ELF4	ELF4	ENSG00000102034	Ets	MA0641.1	NA	cluster_1_contacting_ocrs	5
134	MA1107.2	MA1107.2	10.8327	3.22431e-07	0.0604349	1.79503e-06	MA11072	KLF9	KLF9	ENSG00000119138	C2H2 ZF	MA1107.2	NA	cluster_1_contacting_ocrs	1
135	MA0840.1	MA0840.1	1.374	3.95376e-07	0.0237847	2.18482e-06	MA08401	Creb5	CREB5	ENSG00000146592	bZIP	MA0840.1	NA	cluster_1_contacting_ocrs	2
136	MA0637.1	MA0637.1	0.29829	5.20188e-07	0.0622389	2.85339e-06	MA06371	CENPB	CENPB	ENSG00000125817	CENPB	MA0637.1	NA	cluster_1_contacting_ocrs	3
137	MA0738.1	MA0738.1	1.27982	9.56649e-07	0.0845044	5.2092e-06	MA07381	HIC2	HIC2	ENSG00000169635	C2H2 ZF	MA0738.1	NA	cluster_1_contacting_ocrs	not_differential
138	MA1545.1	MA1545.1	0.168629	2.54944e-06	0.0445784	1.37818e-05	MA15451	OVOL2	OVOL2	ENSG00000125850	C2H2 ZF	MA1545.1	NA	cluster_1_contacting_ocrs	not_differential
139	MA0139.1	MA0139.1	116.403	2.61514e-06	0.0603874	1.40352e-05	MA01391	CTCF	CTCF	ENSG00000102974	C2H2 ZF	MA0139.1	NA	cluster_1_contacting_ocrs	5
140	MA0504.1	MA0504.1	7.10375	3.28474e-06	0.0385967	1.7503e-05	MA05041	NR2C2	NR2C2	ENSG00000177463	Nuclear receptor	MA0504.1	NA	cluster_1_contacting_ocrs	not_differential
141	MA0656.1	MA0656.1	2.11698	3.82166e-06	0.017518	2.02196e-05	MA06561	JDP2(var.2)	JDP2	ENSG00000140044	bZIP	MA0656.1	NA	cluster_1_contacting_ocrs	not_differential
142	MA0663.1	MA0663.1	0.864441	6.53661e-06	0.0280573	3.43402e-05	MA06631	MLX	MLX	ENSG00000108788	bHLH	MA0663.1	NA	cluster_1_contacting_ocrs	3
143	MA1604.1	MA1604.1	2.18837	8.51879e-06	0.0632833	4.44407e-05	MA16041	Ebf2	EBF2	ENSG00000221818	EBF1	MA1604.1	NA	cluster_1_contacting_ocrs	not_differential
144	MA0828.1	MA0828.1	1.12337	1.02553e-05	0.0253038	5.31281e-05	MA08281	SREBF2(var.2)	SREBF2	ENSG00000198911	bHLH	MA0828.1	NA	cluster_1_contacting_ocrs	3
145	MA0527.1	MA0527.1	2.12903	1.07806e-05	0.0356058	5.54644e-05	MA05271	ZBTB33	ZBTB33	ENSG00000177485	C2H2 ZF	MA0527.1	NA	cluster_1_contacting_ocrs	not_differential
146	MA0844.1	MA0844.1	0.675569	1.71929e-05	0.0318078	8.78488e-05	MA08441	XBP1	XBP1	ENSG00000100219	bZIP	MA0844.1	NA	cluster_1_contacting_ocrs	1
147	MA0640.2	MA0640.2	5.05334	2.05141e-05	0.0733954	0.000104106	MA06402	ELF3	ELF3	ENSG00000163435	Ets	MA0640.2	NA	cluster_1_contacting_ocrs	not_differential
148	MA0834.1	MA0834.1	1.67956	2.65223e-05	0.012106	0.000133687	MA08341	ATF7	ATF7	ENSG00000170653	bZIP,C2H2 ZF	MA0834.1	NA	cluster_1_contacting_ocrs	not_differential
149	MA1100.2	MA1100.2	2.59447	3.0069e-05	0.0739651	0.000150547	MA11002	ASCL1	ASCL1	ENSG00000139352	bHLH	MA1100.2	NA	cluster_1_contacting_ocrs	not_differential
150	MA1651.1	MA1651.1	6.23206	3.9072e-05	0.0385017	0.000194318	MA16511	ZFP42	ZFP42	ENSG00000179059	C2H2 ZF	MA1651.1	NA	cluster_1_contacting_ocrs	not_differential
151	MA1140.2	MA1140.2	2.22393	4.85027e-05	0.0143373	0.000239623	MA11402	JUNB(var.2)	JUNB	ENSG00000171223	bZIP	MA1140.2	NA	cluster_1_contacting_ocrs	1
152	MA1652.1	MA1652.1	5.53589	9.72827e-05	0.0574915	0.000477453	MA16521	ZKSCAN5	ZKSCAN5	ENSG00000196652	C2H2 ZF	MA1652.1	NA	cluster_1_contacting_ocrs	not_differential
153	MA0107.1	MA0107.1	2.12236	0.000113076	0.0595803	0.000551337	MA01071	RELA	RELA	ENSG00000173039	Rel	MA0107.1	NA	cluster_1_contacting_ocrs	1
154	MA0638.1	MA0638.1	0.61895	0.000119787	0.034324	0.000580269	MA06381	CREB3	CREB3	ENSG00000107175	bZIP	MA0638.1	NA	cluster_1_contacting_ocrs	5
155	MA0062.3	MA0062.3	5.43883	0.000130379	0.066749	0.000627499	MA00623	GABPA	GABPA	ENSG00000154727	Ets	MA0062.3	NA	cluster_1_contacting_ocrs	not_differential
156	MA0059.1	MA0059.1	0.999789	0.000166093	0.0477592	0.000794265	MA00591	MAX::MYC	MAX	ENSG00000125952	bHLH	MA0059.1	NA	cluster_1_contacting_ocrs	not_differential
156	MA0059.1	MA0059.1	0.999789	0.000166093	0.0477592	0.000794265	MA00591	MAX::MYC	MYC	ENSG00000136997	bHLH	MA0059.1	NA	cluster_1_contacting_ocrs	1
157	MA0163.1	MA0163.1	5.89039	0.000194103	0.0497057	0.000922299	MA01631	PLAG1	PLAG1	ENSG00000181690	C2H2 ZF	MA0163.1	NA	cluster_1_contacting_ocrs	4
158	MA0736.1	MA0736.1	0.975539	0.000200584	0.0440562	0.000947062	MA07361	GLIS2	GLIS2	ENSG00000126603	C2H2 ZF	MA0736.1	NA	cluster_1_contacting_ocrs	not_differential
159	MA1574.1	MA1574.1	3.58033	0.000233372	0.034324	0.00109494	MA15741	THRB	THRB	ENSG00000151090	Nuclear receptor	MA1574.1	NA	cluster_1_contacting_ocrs	2
160	MA0502.2	MA0502.2	1.65515	0.000250043	0.0486612	0.00116102	MA05022	NFYB	NFYB	ENSG00000120837	Unknown	MA0502.2	NA	cluster_1_contacting_ocrs	not_differential
161	MA0761.2	MA0761.2	5.05014	0.000250569	0.0714014	0.00116102	MA07612	ETV1	ETV1	ENSG00000006468	Ets	MA0761.2	NA	cluster_1_contacting_ocrs	2
162	MA0473.3	MA0473.3	5.91729	0.000263165	0.063948	0.00121186	MA04733	ELF1	ELF1	ENSG00000120690	Ets	MA0473.3	NA	cluster_1_contacting_ocrs	not_differential
163	MA1573.1	MA1573.1	753.836	0.000294066	0.0134827	0.00134585	MA15731	THAP11	THAP11	ENSG00000168286	THAP finger	MA1573.1	NA	cluster_1_contacting_ocrs	5
164	MA0499.2	MA0499.2	2.0358	0.000337625	0.061147	0.00153578	MA04992	MYOD1	MYOD1	ENSG00000129152	bHLH	MA0499.2	NA	cluster_1_contacting_ocrs	not_differential
165	MA0819.1	MA0819.1	0.730103	0.000785819	0.0545006	0.00354661	MA08191	CLOCK	CLOCK	ENSG00000134852	bHLH	MA0819.1	NA	cluster_1_contacting_ocrs	1
166	MA1514.1	MA1514.1	4.41141	0.000789191	0.046335	0.00354661	MA15141	KLF17	KLF17	ENSG00000171872	C2H2 ZF	MA1514.1	NA	cluster_1_contacting_ocrs	not_differential
167	MA1126.1	MA1126.1	0.922446	0.000835787	0.0504652	0.00373352	MA11261	FOS::JUN(var.2)	FOS	ENSG00000170345	bZIP	MA1126.1	NA	cluster_1_contacting_ocrs	1
167	MA1126.1	MA1126.1	0.922446	0.000835787	0.0504652	0.00373352	MA11261	FOS::JUN(var.2)	JUN	ENSG00000177606	bZIP	MA1126.1	NA	cluster_1_contacting_ocrs	2
168	MA0598.3	MA0598.3	5.49102	0.000860958	0.0655146	0.00382306	MA05983	EHF	EHF	ENSG00000135373	Ets	MA0598.3	NA	cluster_1_contacting_ocrs	not_differential
169	MA0839.1	MA0839.1	0.68503	0.00246333	0.0349411	0.0108737	MA08391	CREB3L1	CREB3L1	ENSG00000157613	bZIP	MA0839.1	NA	cluster_1_contacting_ocrs	not_differential
170	MA1587.1	MA1587.1	27.638	0.0026918	0.0498481	0.0118123	MA15871	ZNF135	ZNF135	ENSG00000176293	C2H2 ZF	MA1587.1	NA	cluster_1_contacting_ocrs	not_differential
171	MA1125.1	MA1125.1	68.3223	0.00285543	0.0879225	0.012457	MA11251	ZNF384	ZNF384	ENSG00000126746	C2H2 ZF	MA1125.1	NA	cluster_1_contacting_ocrs	3
172	MA0024.3	MA0024.3	0.501529	0.00307283	0.0605773	0.0133275	MA00243	E2F1	E2F1	ENSG00000101412	E2F	MA0024.3	NA	cluster_1_contacting_ocrs	5
173	MA1599.1	MA1599.1	3.34398	0.00339471	0.0502279	0.0146385	MA15991	ZNF682	ZNF682	ENSG00000197124	C2H2 ZF	MA1599.1	NA	cluster_1_contacting_ocrs	4
174	MA1581.1	MA1581.1	2.70591	0.00373902	0.0657995	0.0160305	MA15811	ZBTB6	ZBTB6	ENSG00000186130	C2H2 ZF	MA1581.1	NA	cluster_1_contacting_ocrs	not_differential
175	MA0065.2	MA0065.2	3.04612	0.00480402	0.0577288	0.0204788	MA00652	Pparg::Rxra	PPARG	ENSG00000132170	Nuclear receptor	MA0065.2	NA	cluster_1_contacting_ocrs	2
175	MA0065.2	MA0065.2	3.04612	0.00480402	0.0577288	0.0204788	MA00652	Pparg::Rxra	RXRA	ENSG00000186350	Nuclear receptor	MA0065.2	NA	cluster_1_contacting_ocrs	not_differential
176	MA1540.1	MA1540.1	1.29839	0.00489754	0.0668439	0.0207589	MA15401	NR5A1	NR5A1	ENSG00000136931	Nuclear receptor	MA1540.1	NA	cluster_1_contacting_ocrs	not_differential
177	MA0470.2	MA0470.2	0.407971	0.00537657	0.0441986	0.0226606	MA04702	E2F4	E2F4	ENSG00000205250	E2F	MA0470.2	NA	cluster_1_contacting_ocrs	3
178	MA0130.1	MA0130.1	1.29123	0.00707217	0.0845044	0.0296396	MA01301	ZNF354C	ZNF354C	ENSG00000177932	C2H2 ZF	MA0130.1	NA	cluster_1_contacting_ocrs	not_differential
179	MA0776.1	MA0776.1	0.227612	0.00728325	0.0317129	0.0303536	MA07761	MYBL1	MYBL1	ENSG00000185697	Myb/SANT	MA0776.1	NA	cluster_1_contacting_ocrs	not_differential
180	MA0088.2	MA0088.2	13.4816	0.0083376	0.00764337	0.0345547	MA00882	ZNF143	ZNF143	ENSG00000166478	C2H2 ZF	MA0088.2	NA	cluster_1_contacting_ocrs	1
181	MA0511.2	MA0511.2	0.974586	0.00914329	0.0779529	0.0376845	MA05112	RUNX2	RUNX2	ENSG00000124813	Runt	MA0511.2	NA	cluster_1_contacting_ocrs	4
182	MA0154.4	MA0154.4	3.27238	0.00940979	0.0563046	0.0385698	MA01544	EBF1	EBF1	ENSG00000164330	EBF1	MA0154.4	NA	cluster_1_contacting_ocrs	not_differential
183	MA0855.1	MA0855.1	17.3024	0.0104242	0.00417774	0.0424943	MA08551	RXRB	RXRB	ENSG00000204231	Nuclear receptor	MA0855.1	NA	cluster_1_contacting_ocrs	not_differential
184	MA0677.1	MA0677.1	5.26571	0.0108029	0.0219332	0.0437988	MA06771	Nr2f6	NR2F6	ENSG00000160113	Nuclear receptor	MA0677.1	NA	cluster_1_contacting_ocrs	3
185	MA0856.1	MA0856.1	13.3175	0.0109882	0.00465249	0.0443092	MA08561	RXRG	RXRG	ENSG00000143171	Nuclear receptor	MA0856.1	NA	cluster_1_contacting_ocrs	not_differential
186	MA1466.1	MA1466.1	0.677774	0.0110805	0.0142423	0.0444411	MA14661	ATF6	ATF6	ENSG00000118217	bZIP	MA1466.1	NA	cluster_1_contacting_ocrs	1
187	MA0512.2	MA0512.2	14.7841	0.0117171	0.00479491	0.0465079	MA05122	Rxra	RXRA	ENSG00000186350	Nuclear receptor	MA0512.2	NA	cluster_1_contacting_ocrs	not_differential
188	MA1124.1	MA1124.1	41.9765	0.0117205	0.0145746	0.0465079	MA11241	ZNF24	ZNF24	ENSG00000172466	C2H2 ZF	MA1124.1	NA	cluster_1_contacting_ocrs	not_differential
189	MA1509.1	MA1509.1	0.35664	0.0123442	0.043534	0.0487238	MA15091	IRF6	IRF6	ENSG00000117595	IRF	MA1509.1	NA	cluster_1_contacting_ocrs	not_differential
190	MA1491.1	MA1491.1	1.33301	0.0128794	0.0492784	0.0505687	MA14911	GLI3	GLI3	ENSG00000106571	C2H2 ZF	MA1491.1	NA	cluster_1_contacting_ocrs	not_differential
191	MA0073.1	MA0073.1	36.9296	0.0150389	0.0341815	0.0587385	MA00731	RREB1	RREB1	ENSG00000124782	C2H2 ZF	MA0073.1	NA	cluster_1_contacting_ocrs	not_differential
192	MA0083.3	MA0083.3	4.45435	0.0179332	0.00688378	0.0696778	MA00833	SRF	SRF	ENSG00000112658	MADS box	MA0083.3	NA	cluster_1_contacting_ocrs	3
193	MA0863.1	MA0863.1	3.36181	0.0215413	0.0256362	0.0832632	MA08631	MTF1	MTF1	ENSG00000188786	C2H2 ZF	MA0863.1	NA	cluster_1_contacting_ocrs	1
194	MA1654.1	MA1654.1	746.844	0.0217809	0.0018515	0.0837556	MA16541	ZNF16	ZNF16	ENSG00000170631	C2H2 ZF	MA1654.1	NA	cluster_1_contacting_ocrs	not_differential
195	MA1537.1	MA1537.1	6.356	0.0230652	0.0128656	0.0882391	MA15371	NR2F1(var.2)	NR2F1	ENSG00000175745	Nuclear receptor	MA1537.1	NA	cluster_1_contacting_ocrs	not_differential
196	MA0137.3	MA0137.3	2.55918	0.0237289	0.0488986	0.090315	MA01373	STAT1	STAT1	ENSG00000115415	STAT	MA0137.3	NA	cluster_1_contacting_ocrs	3
197	MA1550.1	MA1550.1	7.05043	0.0239226	0.0118686	0.09059	MA15501	PPARD	PPARD	ENSG00000112033	Nuclear receptor	MA1550.1	NA	cluster_1_contacting_ocrs	not_differential
198	MA1529.1	MA1529.1	3.70069	0.0248715	0.0302412	0.0937076	MA15291	NHLH2	NHLH2	ENSG00000177551	bHLH	MA1529.1	NA	cluster_1_contacting_ocrs	not_differential
199	MA1558.1	MA1558.1	2.01243	0.026336	0.0956608	0.0984859	MA15581	SNAI1	SNAI1	ENSG00000124216	C2H2 ZF	MA1558.1	NA	cluster_1_contacting_ocrs	1
200	MA1493.1	MA1493.1	0.658984	0.0264037	0.0436764	0.0984859	MA14931	HES6	HES6	ENSG00000144485	bHLH	MA1493.1	NA	cluster_1_contacting_ocrs	3
201	MA0145.3	MA0145.3	0.561029	0.0273429	0.0557824	0.101267	MA01453	TFCP2	TFCP2	ENSG00000135457	Grainyhead	MA0145.3	NA	cluster_1_contacting_ocrs	3
202	MA1117.1	MA1117.1	1.1667	0.0274208	0.06015	0.101267	MA11171	RELB	RELB	ENSG00000104856	Rel	MA1117.1	NA	cluster_1_contacting_ocrs	1
203	MA0735.1	MA0735.1	0.0734907	0.0293966	0.00356058	0.108029	MA07351	GLIS1	GLIS1	ENSG00000174332	C2H2 ZF	MA0735.1	NA	cluster_1_contacting_ocrs	not_differential
204	MA0657.1	MA0657.1	5.08321	0.0298214	0.0150968	0.109053	MA06571	KLF13	KLF13	ENSG00000169926	C2H2 ZF	MA0657.1	NA	cluster_1_contacting_ocrs	4
205	MA1470.1	MA1470.1	0.942737	0.029989	0.00607672	0.109131	MA14701	BACH2(var.2)	BACH2	ENSG00000112182	bZIP	MA1470.1	NA	cluster_1_contacting_ocrs	1
206	MA0518.1	MA0518.1	2.65536	0.0311191	0.0682207	0.112693	MA05181	Stat4	STAT4	ENSG00000138378	STAT	MA0518.1	NA	cluster_1_contacting_ocrs	3
207	MA1625.1	MA1625.1	2.55948	0.0350627	0.0537885	0.126361	MA16251	Stat5b	STAT5B	ENSG00000173757	STAT	MA1625.1	NA	cluster_1_contacting_ocrs	not_differential
208	MA0798.2	MA0798.2	2.71832	0.0399051	0.0349411	0.143121	MA07982	RFX3	RFX3	ENSG00000080298	RFX	MA0798.2	NA	cluster_1_contacting_ocrs	not_differential
209	MA0749.1	MA0749.1	0.171601	0.0408496	0.0107767	0.145808	MA07491	ZBED1	ZBED1	ENSG00000214717	BED ZF	MA0749.1	NA	cluster_1_contacting_ocrs	not_differential
210	MA0758.1	MA0758.1	3.20354	0.0428002	0.00237372	0.152043	MA07581	E2F7	E2F7	ENSG00000165891	E2F	MA0758.1	NA	cluster_1_contacting_ocrs	5
211	MA1602.1	MA1602.1	0.528664	0.0442742	0.0313806	0.156533	MA16021	ZSCAN29	ZSCAN29	ENSG00000140265	C2H2 ZF,MADF	MA1602.1	NA	cluster_1_contacting_ocrs	not_differential
212	MA0494.1	MA0494.1	1.94199	0.0460528	0.052839	0.162054	MA04941	Nr1h3::Rxra	NR1H3	ENSG00000025434	Nuclear receptor	MA0494.1	NA	cluster_1_contacting_ocrs	not_differential
212	MA0494.1	MA0494.1	1.94199	0.0460528	0.052839	0.162054	MA04941	Nr1h3::Rxra	RXRA	ENSG00000186350	Nuclear receptor	MA0494.1	NA	cluster_1_contacting_ocrs	not_differential
213	MA0144.2	MA0144.2	2.53981	0.0465206	0.0661793	0.162931	MA01442	STAT3	STAT3	ENSG00000168610	STAT	MA0144.2	NA	cluster_1_contacting_ocrs	3
214	MA0752.1	MA0752.1	4.93259	0.0471562	0.00147171	0.164386	MA07521	ZNF410	ZNF410	ENSG00000119725	C2H2 ZF	MA0752.1	NA	cluster_1_contacting_ocrs	not_differential
215	MA0620.3	MA0620.3	1.44521	0.0500387	0.041635	0.173623	MA06203	MITF	MITF	ENSG00000187098	bHLH	MA0620.3	NA	cluster_1_contacting_ocrs	2
216	MA1154.1	MA1154.1	4.18372	0.0517499	0.0199392	0.178729	MA11541	ZNF282	ZNF282	ENSG00000170265	C2H2 ZF	MA1154.1	NA	cluster_1_contacting_ocrs	5
217	MA1418.1	MA1418.1	59.741	0.0617256	0.0115363	0.2122	MA14181	IRF3	IRF3	ENSG00000126456	IRF	MA1418.1	NA	cluster_1_contacting_ocrs	4
218	MA0526.3	MA0526.3	1.88904	0.0642525	0.0429643	0.219374	MA05263	USF2	USF2	ENSG00000105698	bHLH	MA0526.3	NA	cluster_1_contacting_ocrs	4
219	MA0683.1	MA0683.1	4.46631	0.0644007	0.0132928	0.219374	MA06831	POU4F2	POU4F2	ENSG00000151615	Homeodomain,POU	MA0683.1	NA	cluster_1_contacting_ocrs	not_differential
220	MA1114.1	MA1114.1	2.73525	0.0661337	0.0529339	0.224141	MA11141	PBX3	PBX3	ENSG00000167081	Homeodomain	MA1114.1	NA	cluster_1_contacting_ocrs	not_differential
221	MA0116.1	MA0116.1	2.02085	0.0664011	0.0336118	0.224141	MA01161	Znf423	ZNF423	ENSG00000102935	C2H2 ZF	MA0116.1	NA	cluster_1_contacting_ocrs	not_differential
222	MA0734.2	MA0734.2	1.03087	0.0753454	0.0374573	0.253188	MA07342	GLI2	GLI2	ENSG00000074047	C2H2 ZF	MA0734.2	NA	cluster_1_contacting_ocrs	2
223	MA0592.3	MA0592.3	2.06371	0.0804277	0.040733	0.269054	MA05923	ESRRA	ESRRA	ENSG00000173153	Nuclear receptor	MA0592.3	NA	cluster_1_contacting_ocrs	3
224	MA0821.1	MA0821.1	1.42951	0.0888182	0.00612419	0.295796	MA08211	HES5	HES5	ENSG00000197921	bHLH	MA0821.1	NA	cluster_1_contacting_ocrs	not_differential
225	MA1508.1	MA1508.1	4.42432	0.0918444	0.0752943	0.304515	MA15081	IKZF1	IKZF1	ENSG00000185811	C2H2 ZF	MA1508.1	NA	cluster_1_contacting_ocrs	not_differential
226	MA0822.1	MA0822.1	1.62271	0.0935482	0.00621914	0.308792	MA08221	HES7	HES7	ENSG00000179111	bHLH	MA0822.1	NA	cluster_1_contacting_ocrs	not_differential
227	MA0106.3	MA0106.3	5.48213	0.0973316	0.00892518	0.319865	MA01063	TP53	TP53	ENSG00000141510	p53	MA0106.3	NA	cluster_1_contacting_ocrs	3
228	MA0595.1	MA0595.1	1.44834	0.114129	0.0654197	0.373422	MA05951	SREBF1	SREBF1	ENSG00000072310	bHLH	MA0595.1	NA	cluster_1_contacting_ocrs	3
229	MA1143.1	MA1143.1	0.705958	0.139167	0.044531	0.453357	MA11431	FOSL1::JUND(var.2)	FOSL1	ENSG00000175592	bZIP	MA1143.1	NA	cluster_1_contacting_ocrs	1
229	MA1143.1	MA1143.1	0.705958	0.139167	0.044531	0.453357	MA11431	FOSL1::JUND(var.2)	JUND	ENSG00000130522	bZIP	MA1143.1	NA	cluster_1_contacting_ocrs	3
230	MA0777.1	MA0777.1	0.238849	0.142402	0.032425	0.461876	MA07771	MYBL2	MYBL2	ENSG00000101057	Myb/SANT	MA0777.1	NA	cluster_1_contacting_ocrs	5
231	MA0728.1	MA0728.1	6.08008	0.152418	0.00688378	0.492223	MA07281	Nr2f6(var.2)	NR2F6	ENSG00000160113	Nuclear receptor	MA0728.1	NA	cluster_1_contacting_ocrs	3
232	MA1555.1	MA1555.1	1.33415	0.167805	0.0309533	0.53958	MA15551	RXRB(var.2)	RXRB	ENSG00000204231	Nuclear receptor	MA1555.1	NA	cluster_1_contacting_ocrs	not_differential
233	MA0838.1	MA0838.1	0.229858	0.171071	0.0436764	0.54772	MA08381	CEBPG	CEBPG	ENSG00000153879	bZIP	MA0838.1	NA	cluster_1_contacting_ocrs	1
234	MA0737.1	MA0737.1	0.617859	0.192147	0.0189423	0.612571	MA07371	GLIS3	GLIS3	ENSG00000107249	C2H2 ZF	MA0737.1	NA	cluster_1_contacting_ocrs	1
235	MA0647.1	MA0647.1	0.726065	0.199696	0.0425845	0.631016	MA06471	GRHL1	GRHL1	ENSG00000134317	Grainyhead	MA0647.1	NA	cluster_1_contacting_ocrs	not_differential
236	MA1556.1	MA1556.1	1.51749	0.200432	0.0215059	0.631016	MA15561	RXRG(var.2)	RXRG	ENSG00000143171	Nuclear receptor	MA1556.1	NA	cluster_1_contacting_ocrs	not_differential
237	MA0770.1	MA0770.1	2.39562	0.20047	0.0211736	0.631016	MA07701	HSF2	HSF2	ENSG00000025156	HSF	MA0770.1	NA	cluster_1_contacting_ocrs	not_differential
238	MA0519.1	MA0519.1	2.40902	0.203277	0.0694075	0.637163	MA05191	Stat5a::Stat5b	STAT5A	ENSG00000126561	STAT	MA0519.1	NA	cluster_1_contacting_ocrs	1
238	MA0519.1	MA0519.1	2.40902	0.203277	0.0694075	0.637163	MA05191	Stat5a::Stat5b	STAT5B	ENSG00000173757	STAT	MA0519.1	NA	cluster_1_contacting_ocrs	not_differential
239	MA1149.1	MA1149.1	1.60139	0.212561	0.0517945	0.659805	MA11491	RARA::RXRG	RARA	ENSG00000131759	Nuclear receptor	MA1149.1	NA	cluster_1_contacting_ocrs	1
239	MA1149.1	MA1149.1	1.60139	0.212561	0.0517945	0.659805	MA11491	RARA::RXRG	RXRG	ENSG00000143171	Nuclear receptor	MA1149.1	NA	cluster_1_contacting_ocrs	not_differential
240	MA0866.1	MA0866.1	2.9699	0.212614	0.00308583	0.659805	MA08661	SOX21	SOX21	ENSG00000125285	Sox	MA0866.1	NA	cluster_1_contacting_ocrs	not_differential
241	MA0697.1	MA0697.1	1.96089	0.213154	0.0393562	0.659805	MA06971	ZIC3	ZIC3	ENSG00000156925	C2H2 ZF	MA0697.1	NA	cluster_1_contacting_ocrs	not_differential
242	MA1565.1	MA1565.1	1.86025	0.222697	0.0623338	0.686496	MA15651	TBX18	TBX18	ENSG00000112837	T-box	MA1565.1	NA	cluster_1_contacting_ocrs	not_differential
243	MA1635.1	MA1635.1	3.12879	0.225342	0.100883	0.691791	MA16351	BHLHE22(var.2)	BHLHE22	ENSG00000180828	bHLH	MA1635.1	NA	cluster_1_contacting_ocrs	not_differential
244	MA0093.3	MA0093.3	1.95872	0.230824	0.0402108	0.705716	MA00933	USF1	USF1	ENSG00000158773	bHLH	MA0093.3	NA	cluster_1_contacting_ocrs	5
245	MA0794.1	MA0794.1	0.370281	0.234982	0.0321401	0.715495	MA07941	PROX1	PROX1	ENSG00000117707	Prospero	MA0794.1	NA	cluster_1_contacting_ocrs	not_differential
246	MA0646.1	MA0646.1	0.573213	0.243965	0.0582985	0.73983	MA06461	GCM1	GCM1	ENSG00000137270	GCM	MA0646.1	NA	cluster_1_contacting_ocrs	not_differential
247	MA0017.2	MA0017.2	1.54626	0.246448	0.0565894	0.744334	MA00172	NR2F1	NR2F1	ENSG00000175745	Nuclear receptor	MA0017.2	NA	cluster_1_contacting_ocrs	not_differential
248	MA0857.1	MA0857.1	1.14198	0.255192	0.00507976	0.76495	MA08571	Rarb	RARB	ENSG00000077092	Nuclear receptor	MA0857.1	NA	cluster_1_contacting_ocrs	not_differential
249	MA0771.1	MA0771.1	1.41946	0.255325	0.0375997	0.76495	MA07711	HSF4	HSF4	ENSG00000102878	HSF	MA0771.1	NA	cluster_1_contacting_ocrs	not_differential
250	MA1533.1	MA1533.1	0.912046	0.259945	0.0473794	0.775676	MA15331	NR1I2	NR1I2	ENSG00000144852	Nuclear receptor	MA1533.1	NA	cluster_1_contacting_ocrs	5
251	MA0509.2	MA0509.2	2.05169	0.261186	0.0416825	0.776275	MA05092	RFX1	RFX1	ENSG00000132005	RFX	MA0509.2	NA	cluster_1_contacting_ocrs	not_differential
252	MA0051.1	MA0051.1	8.14975	0.269008	0.0279149	0.796349	MA00511	IRF2	IRF2	ENSG00000168310	IRF	MA0051.1	NA	cluster_1_contacting_ocrs	5
253	MA0799.1	MA0799.1	5.15513	0.279195	0.0206513	0.823238	MA07991	RFX4	RFX4	ENSG00000111783	RFX	MA0799.1	NA	cluster_1_contacting_ocrs	not_differential
254	MA1584.1	MA1584.1	1.40863	0.281997	0.0306684	0.828228	MA15841	ZIC5	ZIC5	ENSG00000139800	C2H2 ZF	MA1584.1	NA	cluster_1_contacting_ocrs	not_differential
255	MA1539.1	MA1539.1	2.42374	0.285859	0.00731105	0.836278	MA15391	NR2F6(var.3)	NR2F6	ENSG00000160113	Nuclear receptor	MA1539.1	NA	cluster_1_contacting_ocrs	3
256	MA0486.2	MA0486.2	2.19793	0.290752	0.0134827	0.84727	MA04862	HSF1	HSF1	ENSG00000185122	HSF	MA0486.2	NA	cluster_1_contacting_ocrs	3
257	MA0861.1	MA0861.1	1.33982	0.293987	0.0196544	0.850324	MA08611	TP73	TP73	ENSG00000078900	p53	MA0861.1	NA	cluster_1_contacting_ocrs	not_differential
258	MA1420.1	MA1420.1	1.24135	0.29408	0.0470471	0.850324	MA14201	IRF5	IRF5	ENSG00000128604	IRF	MA1420.1	NA	cluster_1_contacting_ocrs	not_differential
259	MA0258.2	MA0258.2	1.8315	0.3125	0.0529339	0.900097	MA02582	ESR2	ESR2	ENSG00000140009	Nuclear receptor	MA0258.2	NA	cluster_1_contacting_ocrs	not_differential
260	MA0469.3	MA0469.3	0.389579	0.315509	0.00365553	0.903928	MA04693	E2F3	E2F3	ENSG00000112242	E2F	MA0469.3	NA	cluster_1_contacting_ocrs	4
261	MA1538.1	MA1538.1	1.66775	0.316845	0.0174231	0.903928	MA15381	NR2F1(var.3)	NR2F1	ENSG00000175745	Nuclear receptor	MA1538.1	NA	cluster_1_contacting_ocrs	not_differential
262	MA0115.1	MA0115.1	1.53515	0.318277	0.00716863	0.903928	MA01151	NR1H2::RXRA	NR1H2	ENSG00000131408	Nuclear receptor	MA0115.1	NA	cluster_1_contacting_ocrs	3
262	MA0115.1	MA0115.1	1.53515	0.318277	0.00716863	0.903928	MA01151	NR1H2::RXRA	RXRA	ENSG00000186350	Nuclear receptor	MA0115.1	NA	cluster_1_contacting_ocrs	not_differential
263	MA1544.1	MA1544.1	0.150611	0.318677	0.0153817	0.903928	MA15441	OVOL1	OVOL1	ENSG00000172818	C2H2 ZF	MA1544.1	NA	cluster_1_contacting_ocrs	not_differential
264	MA0521.1	MA0521.1	2.89428	0.320857	0.0841246	0.904598	MA05211	Tcf12	TCF12	ENSG00000140262	bHLH	MA0521.1	NA	cluster_1_contacting_ocrs	not_differential
265	MA0081.2	MA0081.2	11.0069	0.321339	0.0521269	0.904598	MA00812	SPIB	SPIB	ENSG00000269404	Ets	MA0081.2	NA	cluster_1_contacting_ocrs	not_differential
266	MA1148.1	MA1148.1	1.6706	0.329271	0.0521743	0.923445	MA11481	PPARA::RXRA	PPARA	ENSG00000186951	Nuclear receptor	MA1148.1	NA	cluster_1_contacting_ocrs	4
266	MA1148.1	MA1148.1	1.6706	0.329271	0.0521743	0.923445	MA11481	PPARA::RXRA	RXRA	ENSG00000186350	Nuclear receptor	MA1148.1	NA	cluster_1_contacting_ocrs	not_differential
267	MA1575.1	MA1575.1	2.32933	0.352358	0.0189423	0.984492	MA15751	THRB(var.2)	THRB	ENSG00000151090	Nuclear receptor	MA1575.1	NA	cluster_1_contacting_ocrs	2
268	MA1588.1	MA1588.1	1.54459	0.379922	0.0279624	1	MA15881	ZNF136	ZNF136	ENSG00000196646	C2H2 ZF	MA1588.1	NA	cluster_1_contacting_ocrs	not_differential
269	MA0463.2	MA0463.2	1.07235	0.402501	0.0390239	1	MA04632	BCL6	BCL6	ENSG00000113916	C2H2 ZF	MA0463.2	NA	cluster_1_contacting_ocrs	1
270	MA0865.1	MA0865.1	1.21011	0.41573	0.0151918	1	MA08651	E2F8	E2F8	ENSG00000129173	E2F	MA0865.1	NA	cluster_1_contacting_ocrs	5
271	MA1119.1	MA1119.1	1.68435	0.417041	0.0558299	1	MA11191	SIX2	SIX2	ENSG00000170577	Homeodomain	MA1119.1	NA	cluster_1_contacting_ocrs	not_differential
272	MA0860.1	MA0860.1	2.01326	0.42695	0.00256362	1	MA08601	Rarg(var.2)	RARG	ENSG00000172819	Nuclear receptor	MA0860.1	NA	cluster_1_contacting_ocrs	4
273	MA1147.1	MA1147.1	0.714759	0.428247	0.049136	1	MA11471	NR4A2::RXRA	NR4A2	ENSG00000153234	Nuclear receptor	MA1147.1	NA	cluster_1_contacting_ocrs	1
273	MA1147.1	MA1147.1	0.714759	0.428247	0.049136	1	MA11471	NR4A2::RXRA	RXRA	ENSG00000186350	Nuclear receptor	MA1147.1	NA	cluster_1_contacting_ocrs	not_differential
274	MA0600.2	MA0600.2	14.0294	0.431068	0.0090676	1	MA06002	RFX2	RFX2	ENSG00000087903	RFX	MA0600.2	NA	cluster_1_contacting_ocrs	not_differential
275	MA0149.1	MA0149.1	32265.4	0.431989	0.00156665	1	MA01491	EWSR1-FLI1	NA	NA	NA	MA0149.1	NA	cluster_1_contacting_ocrs	not_differential
276	MA1419.1	MA1419.1	1.49769	0.436713	0.00930498	1	MA14191	IRF4	IRF4	ENSG00000137265	IRF	MA1419.1	NA	cluster_1_contacting_ocrs	1
277	MA1155.1	MA1155.1	2.47564	0.444247	0.0123433	1	MA11551	ZSCAN4	ZSCAN4	ENSG00000180532	C2H2 ZF	MA1155.1	NA	cluster_1_contacting_ocrs	not_differential
278	MA1629.1	MA1629.1	4.071	0.445207	0.054643	1	MA16291	Zic2	ZIC2	ENSG00000043355	C2H2 ZF	MA1629.1	NA	cluster_1_contacting_ocrs	not_differential
279	MA1576.1	MA1576.1	1.30977	0.445266	0.0161888	1	MA15761	THRB(var.3)	THRB	ENSG00000151090	Nuclear receptor	MA1576.1	NA	cluster_1_contacting_ocrs	2
280	MA1655.1	MA1655.1	1.60813	0.449999	0.0654197	1	MA16551	ZNF341	ZNF341	ENSG00000131061	C2H2 ZF	MA1655.1	NA	cluster_1_contacting_ocrs	3
281	MA0510.2	MA0510.2	14.8577	0.456325	0.00982719	1	MA05102	RFX5	RFX5	ENSG00000143390	RFX	MA0510.2	NA	cluster_1_contacting_ocrs	3
282	MA1624.1	MA1624.1	1.95788	0.466201	0.055545	1	MA16241	Stat5a	STAT5A	ENSG00000126561	STAT	MA1624.1	NA	cluster_1_contacting_ocrs	1
283	MA0829.2	MA0829.2	1.45438	0.477844	0.0451006	1	MA08292	SREBF1(var.2)	SREBF1	ENSG00000072310	bHLH	MA0829.2	NA	cluster_1_contacting_ocrs	3
284	MA0591.1	MA0591.1	5.68308	0.48056	0.0213635	1	MA05911	Bach1::Mafk	BACH1	ENSG00000156273	bZIP	MA0591.1	NA	cluster_1_contacting_ocrs	1
284	MA0591.1	MA0591.1	5.68308	0.48056	0.0213635	1	MA05911	Bach1::Mafk	MAFK	ENSG00000198517	bZIP	MA0591.1	NA	cluster_1_contacting_ocrs	1
285	MA1485.1	MA1485.1	1.96567	0.494381	0.0235948	1	MA14851	FERD3L	FERD3L	ENSG00000146618	bHLH	MA1485.1	NA	cluster_1_contacting_ocrs	not_differential
286	MA1552.1	MA1552.1	1.18617	0.513486	0.0299088	1	MA15521	RARB(var.3)	RARB	ENSG00000077092	Nuclear receptor	MA1552.1	NA	cluster_1_contacting_ocrs	not_differential
287	MA1643.1	MA1643.1	6.90439	0.548433	0.0209362	1	MA16431	NFIB	NFIB	ENSG00000147862	SMAD	MA1643.1	NA	cluster_1_contacting_ocrs	not_differential
288	MA1589.1	MA1589.1	308.278	0.554735	0.00113938	1	MA15891	ZNF140	ZNF140	ENSG00000196387	C2H2 ZF	MA1589.1	NA	cluster_1_contacting_ocrs	not_differential
289	MA0153.2	MA0153.2	1.0242	0.566267	0.0300513	1	MA01532	HNF1B	HNF1B	ENSG00000275410	Homeodomain	MA0153.2	NA	cluster_1_contacting_ocrs	not_differential
290	MA1601.1	MA1601.1	2.21536	0.569179	0.0722085	1	MA16011	ZNF75D	ZNF75D	ENSG00000186376	C2H2 ZF	MA1601.1	NA	cluster_1_contacting_ocrs	4
291	MA0832.1	MA0832.1	1.71526	0.588177	0.0153817	1	MA08321	Tcf21	TCF21	ENSG00000118526	bHLH	MA0832.1	NA	cluster_1_contacting_ocrs	not_differential
292	MA1600.1	MA1600.1	1.69347	0.596794	0.0196069	1	MA16001	ZNF684	ZNF684	ENSG00000117010	C2H2 ZF	MA1600.1	NA	cluster_1_contacting_ocrs	not_differential
293	MA0757.1	MA0757.1	1.7007	0.604593	0.0213635	1	MA07571	ONECUT3	ONECUT3	ENSG00000205922	CUT,Homeodomain	MA0757.1	NA	cluster_1_contacting_ocrs	2
294	MA1621.1	MA1621.1	1.95328	0.614133	0.0714489	1	MA16211	Rbpjl	RBPJL	ENSG00000124232	CSL	MA1621.1	NA	cluster_1_contacting_ocrs	not_differential
295	MA0652.1	MA0652.1	1.79463	0.640205	0.0103019	1	MA06521	IRF8	IRF8	ENSG00000140968	IRF	MA0652.1	NA	cluster_1_contacting_ocrs	1
296	MA0159.1	MA0159.1	1.55546	0.642959	0.0535511	1	MA01591	RARA::RXRA	RARA	ENSG00000131759	Nuclear receptor	MA0159.1	NA	cluster_1_contacting_ocrs	1
296	MA0159.1	MA0159.1	1.55546	0.642959	0.0535511	1	MA01591	RARA::RXRA	RXRA	ENSG00000186350	Nuclear receptor	MA0159.1	NA	cluster_1_contacting_ocrs	not_differential
297	MA0009.2	MA0009.2	0.884789	0.646582	0.0157615	1	MA00092	TBXT	TBXT	ENSG00000164458	NA	MA0009.2	NA	cluster_1_contacting_ocrs	not_differential
298	MA1116.1	MA1116.1	1.87615	0.649968	0.102972	1	MA11161	RBPJ	RBPJ	ENSG00000168214	CSL	MA1116.1	NA	cluster_1_contacting_ocrs	1
299	MA0112.3	MA0112.3	0.664618	0.653709	0.00640904	1	MA01123	ESR1	ESR1	ENSG00000091831	Nuclear receptor	MA0112.3	NA	cluster_1_contacting_ocrs	not_differential
300	MA0689.1	MA0689.1	1.39388	0.660121	0.0469996	1	MA06891	TBX20	TBX20	ENSG00000164532	T-box	MA0689.1	NA	cluster_1_contacting_ocrs	not_differential
301	MA0160.1	MA0160.1	1.2433	0.677528	0.0709267	1	MA01601	NR4A2	NR4A2	ENSG00000153234	Nuclear receptor	MA0160.1	NA	cluster_1_contacting_ocrs	1
302	MA0525.2	MA0525.2	0.460261	0.69323	0.00208887	1	MA05252	TP63	TP63	ENSG00000073282	p53	MA0525.2	NA	cluster_1_contacting_ocrs	2
303	MA1521.1	MA1521.1	1.69675	0.70202	0.0567319	1	MA15211	MAFA	MAFA	ENSG00000182759	bZIP	MA1521.1	NA	cluster_1_contacting_ocrs	not_differential
304	MA0007.3	MA0007.3	1.13679	0.703409	0.0122959	1	MA00073	Ar	AR	ENSG00000169083	Nuclear receptor	MA0007.3	NA	cluster_1_contacting_ocrs	not_differential
305	MA1553.1	MA1553.1	1.14036	0.715946	0.0255887	1	MA15531	RARG(var.3)	RARG	ENSG00000172819	Nuclear receptor	MA1553.1	NA	cluster_1_contacting_ocrs	4
306	MA1146.1	MA1146.1	0.768501	0.718529	0.0563046	1	MA11461	NR1H4::RXRA	NR1H4	ENSG00000012504	Nuclear receptor	MA1146.1	NA	cluster_1_contacting_ocrs	not_differential
306	MA1146.1	MA1146.1	0.768501	0.718529	0.0563046	1	MA11461	NR1H4::RXRA	RXRA	ENSG00000186350	Nuclear receptor	MA1146.1	NA	cluster_1_contacting_ocrs	not_differential
307	MA0111.1	MA0111.1	1.17919	0.725623	0.0532662	1	MA01111	Spz1	SPZ1	ENSG00000164299	Unknown	MA0111.1	NA	cluster_1_contacting_ocrs	not_differential
308	MA0466.2	MA0466.2	0.376731	0.726097	0.0603399	1	MA04662	CEBPB	CEBPB	ENSG00000172216	bZIP	MA0466.2	NA	cluster_1_contacting_ocrs	not_differential
309	MA0727.1	MA0727.1	1.17366	0.732867	0.00783327	1	MA07271	NR3C2	NR3C2	ENSG00000151623	Nuclear receptor	MA0727.1	NA	cluster_1_contacting_ocrs	4
310	MA0080.5	MA0080.5	14.5497	0.74355	0.0524592	1	MA00805	SPI1	SPI1	ENSG00000066336	Ets	MA0080.5	NA	cluster_1_contacting_ocrs	2
311	MA0804.1	MA0804.1	0.866928	0.754478	0.024022	1	MA08041	TBX19	TBX19	ENSG00000143178	T-box	MA0804.1	NA	cluster_1_contacting_ocrs	not_differential
312	MA1541.1	MA1541.1	1.70823	0.754802	0.0345139	1	MA15411	NR6A1	NR6A1	ENSG00000148200	Nuclear receptor	MA1541.1	NA	cluster_1_contacting_ocrs	1
313	MA1494.1	MA1494.1	0.719434	0.758927	0.0119161	1	MA14941	HNF4A(var.2)	HNF4A	ENSG00000101076	Nuclear receptor	MA1494.1	NA	cluster_1_contacting_ocrs	2
314	MA0660.1	MA0660.1	2.27557	0.761159	0.0160463	1	MA06601	MEF2B	MEF2B	ENSG00000213999	MADS box	MA0660.1	NA	cluster_1_contacting_ocrs	not_differential
315	MA0745.2	MA0745.2	2.16237	0.763844	0.0645651	1	MA07452	SNAI2	SNAI2	ENSG00000019549	C2H2 ZF	MA0745.2	NA	cluster_1_contacting_ocrs	not_differential
316	MA1546.1	MA1546.1	0.195424	0.766176	0.0499905	1	MA15461	PAX3(var.2)	PAX3	ENSG00000135903	Homeodomain,Paired box	MA1546.1	NA	cluster_1_contacting_ocrs	not_differential
317	MA0781.1	MA0781.1	0.133346	0.768865	0.0055545	1	MA07811	PAX9	PAX9	ENSG00000198807	Paired box	MA0781.1	NA	cluster_1_contacting_ocrs	not_differential
318	MA0859.1	MA0859.1	1.86308	0.773336	0.00631409	1	MA08591	Rarg	RARG	ENSG00000172819	Nuclear receptor	MA0859.1	NA	cluster_1_contacting_ocrs	4
319	MA0778.1	MA0778.1	3.99444	0.779747	0.0300987	1	MA07781	NFKB2	NFKB2	ENSG00000077150	Rel	MA0778.1	NA	cluster_1_contacting_ocrs	3
320	MA0779.1	MA0779.1	0.175686	0.785772	0.0135302	1	MA07791	PAX1	PAX1	ENSG00000125813	Paired box	MA0779.1	NA	cluster_1_contacting_ocrs	not_differential
321	MA0141.3	MA0141.3	1.41374	0.803003	0.0261584	1	MA01413	ESRRB	ESRRB	ENSG00000119715	Nuclear receptor	MA0141.3	NA	cluster_1_contacting_ocrs	not_differential
322	MA1531.1	MA1531.1	0.840407	0.803583	0.0180877	1	MA15311	NR1D1	NR1D1	ENSG00000126368	Nuclear receptor	MA1531.1	NA	cluster_1_contacting_ocrs	1
323	MA0696.1	MA0696.1	1.52908	0.811434	0.028627	1	MA06961	ZIC1	ZIC1	ENSG00000152977	C2H2 ZF	MA0696.1	NA	cluster_1_contacting_ocrs	not_differential
324	MA0150.2	MA0150.2	4.41097	0.814905	0.0317603	1	MA01502	Nfe2l2	NFE2L2	ENSG00000116044	bZIP	MA0150.2	NA	cluster_1_contacting_ocrs	1
325	MA1563.1	MA1563.1	0.747652	0.834529	0.0679358	1	MA15631	SOX18	SOX18	ENSG00000203883	Sox	MA1563.1	NA	cluster_1_contacting_ocrs	not_differential
326	MA0653.1	MA0653.1	1.56874	0.836915	0.00788074	1	MA06531	IRF9	IRF9	ENSG00000213928	IRF	MA0653.1	NA	cluster_1_contacting_ocrs	1
327	MA0492.1	MA0492.1	2.1249	0.849316	0.0344664	1	MA04921	JUND(var.2)	JUND	ENSG00000130522	bZIP	MA0492.1	NA	cluster_1_contacting_ocrs	3
328	MA0782.2	MA0782.2	2.18827	0.849661	0.0510824	1	MA07822	PKNOX1	PKNOX1	ENSG00000160199	Homeodomain	MA0782.2	NA	cluster_1_contacting_ocrs	1
329	MA0768.1	MA0768.1	3.35704	0.849973	0.0254463	1	MA07681	LEF1	LEF1	ENSG00000138795	Sox	MA0768.1	NA	cluster_1_contacting_ocrs	not_differential
330	MA0796.1	MA0796.1	1.22496	0.852617	0.00360805	1	MA07961	TGIF1	TGIF1	ENSG00000177426	Homeodomain	MA0796.1	NA	cluster_1_contacting_ocrs	2
331	MA0069.1	MA0069.1	0.531183	0.864146	0.0579662	1	MA00691	PAX6	PAX6	ENSG00000007372	Homeodomain,Paired box	MA0069.1	NA	cluster_1_contacting_ocrs	2
332	MA0797.1	MA0797.1	1.45357	0.867413	0.017613	1	MA07971	TGIF2	TGIF2	ENSG00000118707	Homeodomain	MA0797.1	NA	cluster_1_contacting_ocrs	3
333	MA0500.2	MA0500.2	3.05044	0.867449	0.0754368	1	MA05002	MYOG	MYOG	ENSG00000122180	bHLH	MA0500.2	NA	cluster_1_contacting_ocrs	not_differential
334	MA0729.1	MA0729.1	0.0764991	0.869365	0.00337068	1	MA07291	RARA	RARA	ENSG00000131759	Nuclear receptor	MA0729.1	NA	cluster_1_contacting_ocrs	1
335	MA0113.3	MA0113.3	0.984971	0.872183	0.0072161	1	MA01133	NR3C1	NR3C1	ENSG00000113580	Nuclear receptor	MA0113.3	NA	cluster_1_contacting_ocrs	not_differential
336	MA1528.1	MA1528.1	1.92341	0.877551	0.0356532	1	MA15281	NFIX(var.2)	NFIX	ENSG00000008441	SMAD	MA1528.1	NA	cluster_1_contacting_ocrs	1
337	MA1571.1	MA1571.1	1.2912	0.88323	0.0405906	1	MA15711	TGIF2LX	TGIF2LX	ENSG00000153779	Homeodomain	MA1571.1	NA	cluster_1_contacting_ocrs	not_differential
338	MA0066.1	MA0066.1	0.875376	0.884643	0.0294341	1	MA00661	PPARG	PPARG	ENSG00000132170	Nuclear receptor	MA0066.1	NA	cluster_1_contacting_ocrs	2
339	MA0816.1	MA0816.1	3.19795	0.885322	0.0516996	1	MA08161	Ascl2	ASCL2	ENSG00000183734	bHLH	MA0816.1	NA	cluster_1_contacting_ocrs	not_differential
340	MA1616.1	MA1616.1	1.71151	0.892841	0.0513198	1	MA16161	Prdm15	PRDM15	ENSG00000141956	NA	MA1616.1	NA	cluster_1_contacting_ocrs	1
341	MA1632.1	MA1632.1	1.73918	0.894539	0.0363179	1	MA16321	ATF2	ATF2	ENSG00000115966	bZIP	MA1632.1	NA	cluster_1_contacting_ocrs	not_differential
342	MA0756.1	MA0756.1	0.786466	0.89671	0.0242594	1	MA07561	ONECUT2	ONECUT2	ENSG00000119547	CUT,Homeodomain	MA0756.1	NA	cluster_1_contacting_ocrs	2
343	MA0074.1	MA0074.1	0.643771	0.897722	0.0376946	1	MA00741	RXRA::VDR	RXRA	ENSG00000186350	Nuclear receptor	MA0074.1	NA	cluster_1_contacting_ocrs	not_differential
343	MA0074.1	MA0074.1	0.643771	0.897722	0.0376946	1	MA00741	RXRA::VDR	VDR	ENSG00000111424	Nuclear receptor	MA0074.1	NA	cluster_1_contacting_ocrs	5
344	MA0643.1	MA0643.1	1.21048	0.900332	0.0490885	1	MA06431	Esrrg	ESRRG	ENSG00000196482	Nuclear receptor	MA0643.1	NA	cluster_1_contacting_ocrs	not_differential
345	MA1421.1	MA1421.1	2.94968	0.900365	0.0309533	1	MA14211	TCF7L1	TCF7L1	ENSG00000152284	Sox	MA1421.1	NA	cluster_1_contacting_ocrs	not_differential
346	MA0105.4	MA0105.4	2.20361	0.910293	0.0118211	1	MA01054	NFKB1	NFKB1	ENSG00000109320	Rel	MA0105.4	NA	cluster_1_contacting_ocrs	1
347	MA1467.1	MA1467.1	1.81462	0.912166	0.0522218	1	MA14671	ATOH1(var.2)	ATOH1	ENSG00000172238	bHLH	MA1467.1	NA	cluster_1_contacting_ocrs	not_differential
348	MA0505.1	MA0505.1	2.25367	0.912735	0.0423471	1	MA05051	Nr5a2	NR5A2	ENSG00000116833	Nuclear receptor	MA0505.1	NA	cluster_1_contacting_ocrs	2
349	MA0046.2	MA0046.2	1.09619	0.91331	0.0357007	1	MA00462	HNF1A	HNF1A	ENSG00000135100	Homeodomain	MA0046.2	NA	cluster_1_contacting_ocrs	not_differential
350	MA0596.1	MA0596.1	1.28341	0.914577	0.0644227	1	MA05961	SREBF2	SREBF2	ENSG00000198911	bHLH	MA0596.1	NA	cluster_1_contacting_ocrs	3
351	MA0773.1	MA0773.1	2.78402	0.91904	0.0152393	1	MA07731	MEF2D	MEF2D	ENSG00000116604	MADS box	MA0773.1	NA	cluster_1_contacting_ocrs	not_differential
352	MA0858.1	MA0858.1	0.720134	0.921488	0.00208887	1	MA08581	Rarb(var.2)	RARB	ENSG00000077092	Nuclear receptor	MA0858.1	NA	cluster_1_contacting_ocrs	not_differential
353	MA1520.1	MA1520.1	1.45631	0.925982	0.0538834	1	MA15201	MAF	MAF	ENSG00000178573	bZIP	MA1520.1	NA	cluster_1_contacting_ocrs	2
354	MA0791.1	MA0791.1	1.79359	0.926464	0.0409229	1	MA07911	POU4F3	POU4F3	ENSG00000091010	Homeodomain,POU	MA0791.1	NA	cluster_1_contacting_ocrs	not_differential
355	MA0783.1	MA0783.1	1.09099	0.926578	0.00816559	1	MA07831	PKNOX2	PKNOX2	ENSG00000165495	Homeodomain	MA0783.1	NA	cluster_1_contacting_ocrs	not_differential
356	MA0715.1	MA0715.1	1.46463	0.927539	0.0289119	1	MA07151	PROP1	PROP1	ENSG00000175325	Homeodomain	MA0715.1	NA	cluster_1_contacting_ocrs	not_differential
357	MA1572.1	MA1572.1	1.19155	0.929389	0.043439	1	MA15721	TGIF2LY	TGIF2LY	ENSG00000176679	Homeodomain	MA1572.1	NA	cluster_1_contacting_ocrs	not_differential
358	MA0906.1	MA0906.1	0.281109	0.940125	0.044436	1	MA09061	HOXC12	HOXC12	ENSG00000123407	Homeodomain	MA0906.1	NA	cluster_1_contacting_ocrs	not_differential
359	MA0018.4	MA0018.4	1.50124	0.943425	0.049136	1	MA00184	CREB1	CREB1	ENSG00000118260	bZIP	MA0018.4	NA	cluster_1_contacting_ocrs	not_differential
360	MA0517.1	MA0517.1	11.0532	0.946385	0.044436	1	MA05171	STAT1::STAT2	STAT1	ENSG00000115415	STAT	MA0517.1	NA	cluster_1_contacting_ocrs	3
360	MA0517.1	MA0517.1	11.0532	0.946385	0.044436	1	MA05171	STAT1::STAT2	STAT2	ENSG00000170581	STAT	MA0517.1	NA	cluster_1_contacting_ocrs	not_differential
361	MA1597.1	MA1597.1	9.0086	0.947698	0.00479491	1	MA15971	ZNF528	ZNF528	ENSG00000167555	C2H2 ZF	MA1597.1	NA	cluster_1_contacting_ocrs	2
362	MA0089.2	MA0089.2	5.76097	0.948451	0.0196544	1	MA00892	NFE2L1	NFE2L1	ENSG00000082641	bZIP	MA0089.2	NA	cluster_1_contacting_ocrs	3
363	MA0631.1	MA0631.1	0.590138	0.948695	0.0375997	1	MA06311	Six3	SIX3	ENSG00000138083	Homeodomain	MA0631.1	NA	cluster_1_contacting_ocrs	2
364	MA0485.2	MA0485.2	0.340071	0.951044	0.037932	1	MA04852	HOXC9	HOXC9	ENSG00000180806	Homeodomain	MA0485.2	NA	cluster_1_contacting_ocrs	2
365	MA0795.1	MA0795.1	0.47113	0.951075	0.0206513	1	MA07951	SMAD3	SMAD3	ENSG00000166949	SMAD	MA0795.1	NA	cluster_1_contacting_ocrs	not_differential
366	MA0135.1	MA0135.1	1.72311	0.951731	0.0310957	1	MA01351	Lhx3	LHX3	ENSG00000107187	Homeodomain	MA0135.1	NA	cluster_1_contacting_ocrs	not_differential
367	MA1118.1	MA1118.1	1.01293	0.953663	0.0569692	1	MA11181	SIX1	SIX1	ENSG00000126778	Homeodomain	MA1118.1	NA	cluster_1_contacting_ocrs	2
368	MA0730.1	MA0730.1	0.628862	0.95754	0.00598177	1	MA07301	RARA(var.2)	RARA	ENSG00000131759	Nuclear receptor	MA0730.1	NA	cluster_1_contacting_ocrs	1
369	MA0667.1	MA0667.1	1.3259	0.95951	0.0336118	1	MA06671	MYF6	MYF6	ENSG00000111046	bHLH	MA0667.1	NA	cluster_1_contacting_ocrs	not_differential
370	MA0690.1	MA0690.1	1.27489	0.96141	0.0473319	1	MA06901	TBX21	TBX21	ENSG00000073861	T-box	MA0690.1	NA	cluster_1_contacting_ocrs	3
371	MA1487.1	MA1487.1	2.16261	0.965911	0.0273927	1	MA14871	FOXE1	FOXE1	ENSG00000178919	Forkhead	MA1487.1	NA	cluster_1_contacting_ocrs	not_differential
372	MA0687.1	MA0687.1	3.19115	0.966807	0.0547379	1	MA06871	SPIC	SPIC	ENSG00000166211	Ets	MA0687.1	NA	cluster_1_contacting_ocrs	not_differential
373	MA0501.1	MA0501.1	5.25642	0.969374	0.0211736	1	MA05011	MAF::NFE2	MAF	ENSG00000178573	bZIP	MA0501.1	NA	cluster_1_contacting_ocrs	2
373	MA0501.1	MA0501.1	5.25642	0.969374	0.0211736	1	MA05011	MAF::NFE2	NFE2	ENSG00000123405	bZIP	MA0501.1	NA	cluster_1_contacting_ocrs	not_differential
374	MA1557.1	MA1557.1	0.448366	0.970664	0.0310008	1	MA15571	SMAD5	SMAD5	ENSG00000113658	SMAD	MA1557.1	NA	cluster_1_contacting_ocrs	not_differential
375	MA1532.1	MA1532.1	0.920246	0.97114	0.048139	1	MA15321	NR1D2	NR1D2	ENSG00000174738	Nuclear receptor	MA1532.1	NA	cluster_1_contacting_ocrs	4
376	MA0681.2	MA0681.2	2.51119	0.972153	0.0366977	1	MA06812	PHOX2B	PHOX2B	ENSG00000109132	Homeodomain	MA0681.2	NA	cluster_1_contacting_ocrs	not_differential
377	MA1559.1	MA1559.1	1.92589	0.972307	0.0652773	1	MA15591	SNAI3	SNAI3	ENSG00000185669	C2H2 ZF	MA1559.1	NA	cluster_1_contacting_ocrs	4
378	MA0480.1	MA0480.1	1.93219	0.972836	0.0673661	1	MA04801	Foxo1	FOXO1	ENSG00000150907	Forkhead	MA0480.1	NA	cluster_1_contacting_ocrs	not_differential
379	MA0907.1	MA0907.1	0.465231	0.973573	0.0457653	1	MA09071	HOXC13	HOXC13	ENSG00000123364	Homeodomain	MA0907.1	NA	cluster_1_contacting_ocrs	not_differential
380	MA0802.1	MA0802.1	1.30503	0.974528	0.0502279	1	MA08021	TBR1	TBR1	ENSG00000136535	T-box	MA0802.1	NA	cluster_1_contacting_ocrs	not_differential
381	MA0665.1	MA0665.1	1.60413	0.975896	0.0387866	1	MA06651	MSC	MSC	ENSG00000178860	bHLH	MA0665.1	NA	cluster_1_contacting_ocrs	not_differential
382	MA0691.1	MA0691.1	1.59209	0.976099	0.0451481	1	MA06911	TFAP4	TFAP4	ENSG00000090447	bHLH	MA0691.1	NA	cluster_1_contacting_ocrs	3
383	MA1111.1	MA1111.1	1.27007	0.977769	0.0610995	1	MA11111	NR2F2	NR2F2	ENSG00000185551	Nuclear receptor	MA1111.1	NA	cluster_1_contacting_ocrs	not_differential
384	MA1105.2	MA1105.2	1.24984	0.979908	0.0544531	1	MA11052	GRHL2	GRHL2	ENSG00000083307	Grainyhead	MA1105.2	NA	cluster_1_contacting_ocrs	not_differential
385	MA0488.1	MA0488.1	1.95689	0.980309	0.0340866	1	MA04881	JUN	JUN	ENSG00000177606	bZIP	MA0488.1	NA	cluster_1_contacting_ocrs	2
386	MA0140.2	MA0140.2	1.15981	0.981608	0.0404956	1	MA01402	GATA1::TAL1	GATA1	ENSG00000102145	GATA	MA0140.2	NA	cluster_1_contacting_ocrs	not_differential
386	MA0140.2	MA0140.2	1.15981	0.981608	0.0404956	1	MA01402	GATA1::TAL1	TAL1	ENSG00000162367	bHLH	MA0140.2	NA	cluster_1_contacting_ocrs	2
387	MA0072.1	MA0072.1	0.90239	0.982972	0.024117	1	MA00721	RORA(var.2)	RORA	ENSG00000069667	Nuclear receptor	MA0072.1	NA	cluster_1_contacting_ocrs	4
388	MA0680.1	MA0680.1	0.369453	0.983373	0.014812	1	MA06801	PAX7	PAX7	ENSG00000009709	Homeodomain,Paired box	MA0680.1	NA	cluster_1_contacting_ocrs	2
389	MA0496.3	MA0496.3	3.17514	0.984097	0.0573965	1	MA04963	MAFK	MAFK	ENSG00000198517	bZIP	MA0496.3	NA	cluster_1_contacting_ocrs	1
390	MA0029.1	MA0029.1	1.20119	0.984551	0.0386916	1	MA00291	Mecom	MECOM	ENSG00000085276	C2H2 ZF	MA0029.1	NA	cluster_1_contacting_ocrs	not_differential
391	MA0520.1	MA0520.1	2.22393	0.985102	0.0540258	1	MA05201	Stat6	STAT6	ENSG00000166888	STAT	MA0520.1	NA	cluster_1_contacting_ocrs	3
392	MA0679.2	MA0679.2	1.98418	0.985949	0.0340391	1	MA06792	ONECUT1	ONECUT1	ENSG00000169856	CUT,Homeodomain	MA0679.2	NA	cluster_1_contacting_ocrs	not_differential
393	MA0842.2	MA0842.2	0.838155	0.988591	0.0373148	1	MA08422	NRL	NRL	ENSG00000129535	bZIP	MA0842.2	NA	cluster_1_contacting_ocrs	not_differential
394	MA1527.1	MA1527.1	1.70794	0.988647	0.0139575	1	MA15271	NFIC(var.2)	NFIC	ENSG00000141905	SMAD	MA1527.1	NA	cluster_1_contacting_ocrs	5
395	MA1641.1	MA1641.1	2.20087	0.988779	0.0591056	1	MA16411	MYF5	MYF5	ENSG00000111049	bHLH	MA1641.1	NA	cluster_1_contacting_ocrs	not_differential
396	MA0119.1	MA0119.1	1.60304	0.99028	0.0312856	1	MA01191	NFIC::TLX1	NFIC	ENSG00000141905	SMAD	MA0119.1	NA	cluster_1_contacting_ocrs	5
396	MA0119.1	MA0119.1	1.60304	0.99028	0.0312856	1	MA01191	NFIC::TLX1	TLX1	ENSG00000107807	Homeodomain	MA0119.1	NA	cluster_1_contacting_ocrs	not_differential
397	MA0060.3	MA0060.3	1.76491	0.990483	0.0398785	1	MA00603	NFYA	NFYA	ENSG00000001167	CBF/NF-Y	MA0060.3	NA	cluster_1_contacting_ocrs	1
398	MA0038.2	MA0038.2	1.21215	0.990547	0.0364603	1	MA00382	GFI1	GFI1	ENSG00000162676	C2H2 ZF	MA0038.2	NA	cluster_1_contacting_ocrs	1
399	MA0497.1	MA0497.1	3.52606	0.991075	0.0570167	1	MA04971	MEF2C	MEF2C	ENSG00000081189	MADS box	MA0497.1	NA	cluster_1_contacting_ocrs	2
400	MA0837.1	MA0837.1	0.456759	0.991764	0.0636156	1	MA08371	CEBPE	CEBPE	ENSG00000092067	bZIP	MA0837.1	NA	cluster_1_contacting_ocrs	not_differential
401	MA0731.1	MA0731.1	0.192864	0.992826	0.000427269	1	MA07311	BCL6B	BCL6B	ENSG00000161940	C2H2 ZF	MA0731.1	NA	cluster_1_contacting_ocrs	not_differential
402	MA0843.1	MA0843.1	0.474948	0.993793	0.0251139	1	MA08431	TEF	TEF	ENSG00000167074	bZIP	MA0843.1	NA	cluster_1_contacting_ocrs	not_differential
403	MA1542.1	MA1542.1	0.7447	0.99417	0.0520794	1	MA15421	OSR1	OSR1	ENSG00000143867	C2H2 ZF	MA1542.1	NA	cluster_1_contacting_ocrs	not_differential
404	MA0772.1	MA0772.1	2.37499	0.994232	0.0410179	1	MA07721	IRF7	IRF7	ENSG00000185507	IRF	MA0772.1	NA	cluster_1_contacting_ocrs	not_differential
405	MA1620.1	MA1620.1	1.90338	0.994594	0.0680308	1	MA16201	Ptf1a(var.3)	PTF1A	ENSG00000168267	bHLH	MA1620.1	NA	cluster_1_contacting_ocrs	not_differential
406	MA1567.1	MA1567.1	1.05147	0.995431	0.0658944	1	MA15671	TBX6	TBX6	ENSG00000149922	T-box	MA1567.1	NA	cluster_1_contacting_ocrs	not_differential
407	MA0803.1	MA0803.1	1.7875	0.995456	0.0466673	1	MA08031	TBX15	TBX15	ENSG00000092607	T-box	MA0803.1	NA	cluster_1_contacting_ocrs	2
408	MA0869.1	MA0869.1	0.0487005	0.995746	0.000712115	1	MA08691	Sox11	SOX11	ENSG00000176887	Sox	MA0869.1	NA	cluster_1_contacting_ocrs	2
409	MA0870.1	MA0870.1	0.442835	0.996187	0.00545955	1	MA08701	Sox1	SOX1	ENSG00000182968	Sox	MA0870.1	NA	cluster_1_contacting_ocrs	not_differential
410	MA1619.1	MA1619.1	2.32363	0.996316	0.0665591	1	MA16191	Ptf1a(var.2)	PTF1A	ENSG00000168267	bHLH	MA1619.1	NA	cluster_1_contacting_ocrs	not_differential
411	MA0801.1	MA0801.1	1.3581	0.996457	0.0657045	1	MA08011	MGA	MGA	ENSG00000174197	bHLH,T-box	MA0801.1	NA	cluster_1_contacting_ocrs	1
412	MA0780.1	MA0780.1	0.477811	0.996538	0.0182776	1	MA07801	PAX3	PAX3	ENSG00000135903	Homeodomain,Paired box	MA0780.1	NA	cluster_1_contacting_ocrs	not_differential
413	MA0784.1	MA0784.1	2.4656	0.996679	0.0302412	1	MA07841	POU1F1	POU1F1	ENSG00000064835	Homeodomain,POU	MA0784.1	NA	cluster_1_contacting_ocrs	not_differential
414	MA1506.1	MA1506.1	0.330573	0.997094	0.0328048	1	MA15061	HOXD10	HOXD10	ENSG00000128710	Homeodomain	MA1506.1	NA	cluster_1_contacting_ocrs	not_differential
415	MA1112.2	MA1112.2	1.52267	0.997523	0.0598177	1	MA11122	NR4A1	NR4A1	ENSG00000123358	Nuclear receptor	MA1112.2	NA	cluster_1_contacting_ocrs	1
416	MA1503.1	MA1503.1	0.377381	0.997632	0.0438663	1	MA15031	HOXB9	HOXB9	ENSG00000170689	Homeodomain	MA1503.1	NA	cluster_1_contacting_ocrs	1
417	MA0807.1	MA0807.1	1.36039	0.997817	0.0658944	1	MA08071	TBX5	TBX5	ENSG00000089225	T-box	MA0807.1	NA	cluster_1_contacting_ocrs	not_differential
418	MA1649.1	MA1649.1	1.18306	0.998145	0.0758166	1	MA16491	ZBTB12	ZBTB12	ENSG00000204366	C2H2 ZF	MA1649.1	NA	cluster_1_contacting_ocrs	5
419	MA1561.1	MA1561.1	0.361029	0.998325	0.0554026	1	MA15611	SOX12	SOX12	ENSG00000177732	Sox	MA1561.1	NA	cluster_1_contacting_ocrs	5
420	MA1585.1	MA1585.1	0.763915	0.998406	0.0495158	1	MA15851	ZKSCAN1	ZKSCAN1	ENSG00000106261	C2H2 ZF	MA1585.1	NA	cluster_1_contacting_ocrs	not_differential
421	MA1633.1	MA1633.1	3.46197	0.998568	0.0461451	1	MA16331	BACH1	BACH1	ENSG00000156273	bZIP	MA1633.1	NA	cluster_1_contacting_ocrs	1
422	MA0897.1	MA0897.1	0.841648	0.998579	0.0343714	1	MA08971	Hmx2	HMX2	ENSG00000188816	Homeodomain	MA0897.1	NA	cluster_1_contacting_ocrs	not_differential
423	MA0898.1	MA0898.1	0.86406	0.99859	0.0370775	1	MA08981	Hmx3	HMX3	ENSG00000188620	Homeodomain	MA0898.1	NA	cluster_1_contacting_ocrs	not_differential
424	MA0052.4	MA0052.4	4.54858	0.998736	0.0559723	1	MA00524	MEF2A	MEF2A	ENSG00000068305	MADS box	MA0052.4	NA	cluster_1_contacting_ocrs	not_differential
425	MA1109.1	MA1109.1	1.61435	0.999138	0.0612419	1	MA11091	NEUROD1	NEUROD1	ENSG00000162992	bHLH	MA1109.1	NA	cluster_1_contacting_ocrs	not_differential
426	MA0050.2	MA0050.2	70.8163	0.999142	0.0366502	1	MA00502	IRF1	IRF1	ENSG00000125347	IRF	MA0050.2	NA	cluster_1_contacting_ocrs	1
427	MA1644.1	MA1644.1	1.33613	0.999169	0.0463825	1	MA16441	NFYC	NFYC	ENSG00000066136	Unknown	MA1644.1	NA	cluster_1_contacting_ocrs	3
428	MA0873.1	MA0873.1	0.260277	0.999302	0.0336118	1	MA08731	HOXD12	HOXD12	ENSG00000170178	Homeodomain	MA0873.1	NA	cluster_1_contacting_ocrs	not_differential
429	MA0800.1	MA0800.1	1.19282	0.999354	0.05094	1	MA08001	EOMES	EOMES	ENSG00000163508	T-box	MA0800.1	NA	cluster_1_contacting_ocrs	2
430	MA0805.1	MA0805.1	1.60859	0.999456	0.0535986	1	MA08051	TBX1	TBX1	ENSG00000184058	T-box	MA0805.1	NA	cluster_1_contacting_ocrs	not_differential
431	MA0639.1	MA0639.1	0.539379	0.999535	0.031523	1	MA06391	DBP	DBP	ENSG00000105516	bZIP	MA0639.1	NA	cluster_1_contacting_ocrs	4
432	MA1101.2	MA1101.2	3.34467	0.99955	0.017518	1	MA11012	BACH2	BACH2	ENSG00000112182	bZIP	MA1101.2	NA	cluster_1_contacting_ocrs	1
433	MA0142.1	MA0142.1	2.07538	0.999575	0.0418249	1	MA01421	Pou5f1::Sox2	POU5F1	ENSG00000204531	Homeodomain,POU	MA0142.1	NA	cluster_1_contacting_ocrs	not_differential
433	MA0142.1	MA0142.1	2.07538	0.999575	0.0418249	1	MA01421	Pou5f1::Sox2	SOX2	ENSG00000181449	Sox	MA0142.1	NA	cluster_1_contacting_ocrs	not_differential
434	MA0138.2	MA0138.2	113.391	0.999598	0.00156665	1	MA01382	REST	REST	ENSG00000084093	C2H2 ZF	MA0138.2	NA	cluster_1_contacting_ocrs	not_differential
435	MA0056.2	MA0056.2	1.44883	0.999687	0.0547379	1	MA00562	MZF1	MZF1	ENSG00000099326	C2H2 ZF	MA0056.2	NA	cluster_1_contacting_ocrs	not_differential
436	MA0484.2	MA0484.2	1.3704	0.999726	0.0480441	1	MA04842	HNF4G	HNF4G	ENSG00000164749	Nuclear receptor	MA0484.2	NA	cluster_1_contacting_ocrs	not_differential
437	MA1592.1	MA1592.1	0.807081	0.999788	0.02782	1	MA15921	ZNF274	ZNF274	ENSG00000171606	C2H2 ZF	MA1592.1	NA	cluster_1_contacting_ocrs	not_differential
438	MA0874.1	MA0874.1	0.609751	0.999846	0.021316	1	MA08741	Arx	ARX	ENSG00000004848	Homeodomain	MA0874.1	NA	cluster_1_contacting_ocrs	not_differential
439	MA1489.1	MA1489.1	1.04083	0.999881	0.0229301	1	MA14891	FOXN3	FOXN3	ENSG00000053254	Forkhead	MA1489.1	NA	cluster_1_contacting_ocrs	5
440	MA0114.4	MA0114.4	1.3628	0.999894	0.0477117	1	MA01144	HNF4A	HNF4A	ENSG00000101076	Nuclear receptor	MA0114.4	NA	cluster_1_contacting_ocrs	2
441	MA0896.1	MA0896.1	0.609795	0.999912	0.0353209	1	MA08961	Hmx1	HMX1	ENSG00000215612	Homeodomain	MA0896.1	NA	cluster_1_contacting_ocrs	not_differential
442	MA1657.1	MA1657.1	1.19299	0.999943	0.0441512	1	MA16571	ZNF652	ZNF652	ENSG00000198740	C2H2 ZF	MA1657.1	NA	cluster_1_contacting_ocrs	4
443	MA0790.1	MA0790.1	1.61609	0.999954	0.0429168	1	MA07901	POU4F1	POU4F1	ENSG00000152192	Homeodomain,POU	MA0790.1	NA	cluster_1_contacting_ocrs	not_differential
444	MA0698.1	MA0698.1	1.4683	0.999958	0.0359856	1	MA06981	ZBTB18	ZBTB18	ENSG00000179456	C2H2 ZF	MA0698.1	NA	cluster_1_contacting_ocrs	4
445	MA0041.1	MA0041.1	3.74967	0.99996	0.0682207	1	MA00411	Foxd3	FOXD3	ENSG00000187140	Forkhead	MA0041.1	NA	cluster_1_contacting_ocrs	not_differential
446	MA0513.1	MA0513.1	2.4723	0.999961	0.0554026	1	MA05131	SMAD2::SMAD3::SMAD4	SMAD2	ENSG00000175387	NA	MA0513.1	NA	cluster_1_contacting_ocrs	not_differential
446	MA0513.1	MA0513.1	2.4723	0.999961	0.0554026	1	MA05131	SMAD2::SMAD3::SMAD4	SMAD3	ENSG00000166949	SMAD	MA0513.1	NA	cluster_1_contacting_ocrs	not_differential
446	MA0513.1	MA0513.1	2.4723	0.999961	0.0554026	1	MA05131	SMAD2::SMAD3::SMAD4	SMAD4	ENSG00000141646	SMAD	MA0513.1	NA	cluster_1_contacting_ocrs	not_differential
447	MA0909.2	MA0909.2	0.704082	0.999962	0.0319977	1	MA09092	HOXD13	HOXD13	ENSG00000128714	Homeodomain	MA0909.2	NA	cluster_1_contacting_ocrs	not_differential
448	MA0744.2	MA0744.2	1.15547	0.99997	0.0461451	1	MA07442	SCRT2	SCRT2	ENSG00000215397	C2H2 ZF	MA0744.2	NA	cluster_1_contacting_ocrs	not_differential
449	MA0495.3	MA0495.3	1.58694	0.99997	0.0455754	1	MA04953	MAFF	MAFF	ENSG00000185022	bZIP	MA0495.3	NA	cluster_1_contacting_ocrs	1
450	MA0651.1	MA0651.1	0.350217	0.999973	0.0492784	1	MA06511	HOXC11	HOXC11	ENSG00000123388	Homeodomain	MA0651.1	NA	cluster_1_contacting_ocrs	not_differential
451	MA0743.2	MA0743.2	1.10914	0.999976	0.0424896	1	MA07432	SCRT1	SCRT1	ENSG00000261678	C2H2 ZF	MA0743.2	NA	cluster_1_contacting_ocrs	not_differential
452	MA0030.1	MA0030.1	0.928215	0.999979	0.0429643	1	MA00301	FOXF2	FOXF2	ENSG00000137273	Forkhead	MA0030.1	NA	cluster_1_contacting_ocrs	not_differential
453	MA0478.1	MA0478.1	3.67261	0.999979	0.0785226	1	MA04781	FOSL2	FOSL2	ENSG00000075426	bZIP	MA0478.1	NA	cluster_1_contacting_ocrs	1
454	MA1594.1	MA1594.1	4.00254	0.999982	0.000379795	1	MA15941	ZNF382	ZNF382	ENSG00000161298	C2H2 ZF	MA1594.1	NA	cluster_1_contacting_ocrs	not_differential
455	MA1623.1	MA1623.1	9.23845	0.999984	0.0653722	1	MA16231	Stat2	STAT2	ENSG00000170581	STAT	MA1623.1	NA	cluster_1_contacting_ocrs	not_differential
456	MA0806.1	MA0806.1	1.26069	0.999989	0.0651823	1	MA08061	TBX4	TBX4	ENSG00000121075	T-box	MA0806.1	NA	cluster_1_contacting_ocrs	2
457	MA0703.2	MA0703.2	1.21024	0.99999	0.0229776	1	MA07032	LMX1B	LMX1B	ENSG00000136944	Homeodomain	MA0703.2	NA	cluster_1_contacting_ocrs	not_differential
458	MA0833.2	MA0833.2	1.32333	0.999992	0.0318078	1	MA08332	ATF4	ATF4	ENSG00000128272	bZIP	MA0833.2	NA	cluster_1_contacting_ocrs	3
459	MA0852.2	MA0852.2	1.29963	0.999993	0.0460027	1	MA08522	FOXK1	FOXK1	ENSG00000164916	Forkhead	MA0852.2	NA	cluster_1_contacting_ocrs	not_differential
460	MA1603.1	MA1603.1	1.02547	0.999995	0.0480915	1	MA16031	Dmrt1	DMRT1	ENSG00000137090	DM	MA1603.1	NA	cluster_1_contacting_ocrs	not_differential
461	MA1646.1	MA1646.1	1.9945	0.999996	0.0659894	1	MA16461	OSR2	OSR2	ENSG00000164920	C2H2 ZF	MA1646.1	NA	cluster_1_contacting_ocrs	not_differential
462	MA0851.1	MA0851.1	2.14892	0.999997	0.0420148	1	MA08511	Foxj3	FOXJ3	ENSG00000198815	Forkhead	MA0851.1	NA	cluster_1_contacting_ocrs	not_differential
463	MA0479.1	MA0479.1	0.931951	0.999998	0.0551652	1	MA04791	FOXH1	FOXH1	ENSG00000160973	Forkhead	MA0479.1	NA	cluster_1_contacting_ocrs	not_differential
464	MA0043.3	MA0043.3	0.82565	0.999999	0.0392138	1	MA00433	HLF	HLF	ENSG00000108924	bZIP	MA0043.3	NA	cluster_1_contacting_ocrs	not_differential
465	MA1636.1	MA1636.1	1.26563	0.999999	0.0411603	1	MA16361	CEBPG(var.2)	CEBPG	ENSG00000153879	bZIP	MA1636.1	NA	cluster_1_contacting_ocrs	1
466	MA0593.1	MA0593.1	1.87468	0.999999	0.0634258	1	MA05931	FOXP2	FOXP2	ENSG00000128573	Forkhead	MA0593.1	NA	cluster_1_contacting_ocrs	2
467	MA0847.2	MA0847.2	1.5966	1	0.0513673	1	MA08472	FOXD2	FOXD2	ENSG00000186564	Forkhead	MA0847.2	NA	cluster_1_contacting_ocrs	not_differential
468	MA1472.1	MA1472.1	2.0139	1	0.0756267	1	MA14721	BHLHA15(var.2)	BHLHA15	ENSG00000180535	bHLH	MA1472.1	NA	cluster_1_contacting_ocrs	not_differential
469	MA0688.1	MA0688.1	1.09686	1	0.0605298	1	MA06881	TBX2	TBX2	ENSG00000121068	T-box	MA0688.1	NA	cluster_1_contacting_ocrs	not_differential
470	MA0820.1	MA0820.1	1.64068	1	0.0772408	1	MA08201	FIGLA	FIGLA	ENSG00000183733	bHLH	MA0820.1	NA	cluster_1_contacting_ocrs	not_differential
471	MA0739.1	MA0739.1	1.12218	1	0.0704045	1	MA07391	Hic1	HIC1	ENSG00000177374	C2H2 ZF	MA0739.1	NA	cluster_1_contacting_ocrs	3
472	MA0507.1	MA0507.1	2.85974	1	0.0387866	1	MA05071	POU2F2	POU2F2	ENSG00000028277	Homeodomain,POU	MA0507.1	NA	cluster_1_contacting_ocrs	1
473	MA1642.1	MA1642.1	1.44904	1	0.0714489	1	MA16421	NEUROG2(var.2)	NEUROG2	ENSG00000178403	bHLH	MA1642.1	NA	cluster_1_contacting_ocrs	not_differential
474	MA0854.1	MA0854.1	0.596036	1	0.0221231	1	MA08541	Alx1	ALX1	ENSG00000180318	Homeodomain	MA0854.1	NA	cluster_1_contacting_ocrs	not_differential
475	MA0853.1	MA0853.1	0.479818	1	0.0239746	1	MA08531	Alx4	ALX4	ENSG00000052850	Homeodomain	MA0853.1	NA	cluster_1_contacting_ocrs	not_differential
476	MA1607.1	MA1607.1	1.71298	1	0.0460027	1	MA16071	Foxl2	FOXL2	ENSG00000183770	Forkhead	MA1607.1	NA	cluster_1_contacting_ocrs	not_differential
477	MA0659.2	MA0659.2	1.52255	1	0.0454804	1	MA06592	MAFG	MAFG	ENSG00000197063	bZIP	MA0659.2	NA	cluster_1_contacting_ocrs	1
478	MA0090.3	MA0090.3	1.13793	1	0.045433	1	MA00903	TEAD1	TEAD1	ENSG00000187079	TEA	MA0090.3	NA	cluster_1_contacting_ocrs	not_differential
479	MA0817.1	MA0817.1	0.630717	1	0.0132928	1	MA08171	BHLHE23	BHLHE23	ENSG00000125533	bHLH	MA0817.1	NA	cluster_1_contacting_ocrs	not_differential
480	MA0503.1	MA0503.1	1.45268	1	0.0672237	1	MA05031	Nkx2-5(var.2)	NKX2-5	ENSG00000183072	Homeodomain	MA0503.1	NA	cluster_1_contacting_ocrs	not_differential
481	MA0846.1	MA0846.1	2.36745	1	0.0580137	1	MA08461	FOXC2	FOXC2	ENSG00000176692	Forkhead	MA0846.1	NA	cluster_1_contacting_ocrs	not_differential
482	MA0627.2	MA0627.2	2.27147	1	0.0412552	1	MA06272	POU2F3	POU2F3	ENSG00000137709	Homeodomain,POU	MA0627.2	NA	cluster_1_contacting_ocrs	not_differential
483	MA0091.1	MA0091.1	1.07569	1	0.0404956	1	MA00911	TAL1::TCF3	TAL1	ENSG00000162367	bHLH	MA0091.1	NA	cluster_1_contacting_ocrs	2
483	MA0091.1	MA0091.1	1.07569	1	0.0404956	1	MA00911	TAL1::TCF3	TCF3	ENSG00000071564	bHLH	MA0091.1	NA	cluster_1_contacting_ocrs	3
484	MA0523.1	MA0523.1	2.40539	1	0.0579662	1	MA05231	TCF7L2	TCF7L2	ENSG00000148737	Sox	MA0523.1	NA	cluster_1_contacting_ocrs	2
485	MA1525.1	MA1525.1	1.31557	1	0.0829852	1	MA15251	NFATC4	NFATC4	ENSG00000100968	Rel	MA1525.1	NA	cluster_1_contacting_ocrs	2
486	MA0671.1	MA0671.1	1.22848	1	0.0779529	1	MA06711	NFIX	NFIX	ENSG00000008441	SMAD	MA0671.1	NA	cluster_1_contacting_ocrs	1
487	MA1579.1	MA1579.1	1.76213	1	0.0752943	1	MA15791	ZBTB26	ZBTB26	ENSG00000171448	C2H2 ZF	MA1579.1	NA	cluster_1_contacting_ocrs	not_differential
488	MA0514.1	MA0514.1	2.83915	1	0.0781428	1	MA05141	Sox3	SOX3	ENSG00000134595	Sox	MA0514.1	NA	cluster_1_contacting_ocrs	2
489	MA0908.1	MA0908.1	0.470747	1	0.0578238	1	MA09081	HOXD11	HOXD11	ENSG00000128713	Homeodomain	MA0908.1	NA	cluster_1_contacting_ocrs	not_differential
490	MA0629.1	MA0629.1	0.672302	1	0.0488986	1	MA06291	Rhox11	NA	NA	NA	MA0629.1	NA	cluster_1_contacting_ocrs	not_differential
491	MA0157.2	MA0157.2	0.986885	1	0.040828	1	MA01572	FOXO3	FOXO3	ENSG00000118689	Forkhead	MA0157.2	NA	cluster_1_contacting_ocrs	not_differential
492	MA0788.1	MA0788.1	1.83825	1	0.0351785	1	MA07881	POU3F3	POU3F3	ENSG00000198914	Homeodomain,POU	MA0788.1	NA	cluster_1_contacting_ocrs	not_differential
493	MA0901.2	MA0901.2	1.99698	1	0.0460501	1	MA09012	HOXB13	HOXB13	ENSG00000159184	Homeodomain	MA0901.2	NA	cluster_1_contacting_ocrs	not_differential
494	MA0508.3	MA0508.3	3.91878	1	0.0756741	1	MA05083	PRDM1	PRDM1	ENSG00000057657	C2H2 ZF	MA0508.3	NA	cluster_1_contacting_ocrs	1
495	MA0883.1	MA0883.1	0.52595	1	0.0433441	1	MA08831	Dmbx1	DMBX1	ENSG00000197587	Homeodomain	MA0883.1	NA	cluster_1_contacting_ocrs	not_differential
496	MA0787.1	MA0787.1	1.90379	1	0.034324	1	MA07871	POU3F2	POU3F2	ENSG00000184486	Homeodomain,POU	MA0787.1	NA	cluster_1_contacting_ocrs	not_differential
497	MA0070.1	MA0070.1	0.777706	1	0.0429168	1	MA00701	PBX1	PBX1	ENSG00000185630	Homeodomain	MA0070.1	NA	cluster_1_contacting_ocrs	2
498	MA0878.2	MA0878.2	0.888234	1	0.0410179	1	MA08782	CDX1	CDX1	ENSG00000113722	Homeodomain	MA0878.2	NA	cluster_1_contacting_ocrs	not_differential
499	MA0650.2	MA0650.2	0.868151	1	0.0322826	1	MA06502	HOXA13	HOXA13	ENSG00000106031	Homeodomain	MA0650.2	NA	cluster_1_contacting_ocrs	2
500	MA0483.1	MA0483.1	2.04648	1	0.0612894	1	MA04831	Gfi1b	GFI1B	ENSG00000165702	C2H2 ZF	MA0483.1	NA	cluster_1_contacting_ocrs	not_differential
501	MA0102.4	MA0102.4	0.965936	1	0.0492784	1	MA01024	CEBPA	CEBPA	ENSG00000245848	bZIP	MA0102.4	NA	cluster_1_contacting_ocrs	not_differential
502	MA0161.2	MA0161.2	1.22791	1	0.0715913	1	MA01612	NFIC	NFIC	ENSG00000141905	SMAD	MA0161.2	NA	cluster_1_contacting_ocrs	5
503	MA0841.1	MA0841.1	3.34099	1	0.0224554	1	MA08411	NFE2	NFE2	ENSG00000123405	bZIP	MA0841.1	NA	cluster_1_contacting_ocrs	not_differential
504	MA0002.2	MA0002.2	2.43494	1	0.0751044	1	MA00022	RUNX1	RUNX1	ENSG00000159216	Runt	MA0002.2	NA	cluster_1_contacting_ocrs	not_differential
505	MA0122.3	MA0122.3	1.06171	1	0.0540258	1	MA01223	Nkx3-2	NKX3-2	ENSG00000109705	Homeodomain	MA0122.3	NA	cluster_1_contacting_ocrs	not_differential
506	MA0911.1	MA0911.1	0.418798	1	0.0521269	1	MA09111	Hoxa11	HOXA11	ENSG00000005073	Homeodomain	MA0911.1	NA	cluster_1_contacting_ocrs	not_differential
507	MA1523.1	MA1523.1	1.19509	1	0.0615742	1	MA15231	MSANTD3	MSANTD3	ENSG00000066697	MADF	MA1523.1	NA	cluster_1_contacting_ocrs	5
508	MA0826.1	MA0826.1	0.53921	1	0.0156191	1	MA08261	OLIG1	OLIG1	ENSG00000184221	bHLH	MA0826.1	NA	cluster_1_contacting_ocrs	not_differential
509	MA0702.2	MA0702.2	0.758578	1	0.0369825	1	MA07022	LMX1A	LMX1A	ENSG00000162761	Homeodomain	MA0702.2	NA	cluster_1_contacting_ocrs	2
510	MA1580.1	MA1580.1	0.905527	1	0.0414451	1	MA15801	ZBTB32	ZBTB32	ENSG00000011590	C2H2 ZF	MA1580.1	NA	cluster_1_contacting_ocrs	5
511	MA1473.1	MA1473.1	0.980422	1	0.0446734	1	MA14731	CDX4	CDX4	ENSG00000131264	Homeodomain	MA1473.1	NA	cluster_1_contacting_ocrs	not_differential
512	MA0489.1	MA0489.1	4.34856	1	0.0640904	1	MA04891	JUN(var.2)	JUN	ENSG00000177606	bZIP	MA0489.1	NA	cluster_1_contacting_ocrs	2
513	MA1645.1	MA1645.1	1.23752	1	0.053741	1	MA16451	NKX2-2	NKX2-2	ENSG00000125820	Homeodomain	MA1645.1	NA	cluster_1_contacting_ocrs	not_differential
514	MA1562.1	MA1562.1	0.432776	1	0.047237	1	MA15621	SOX14	SOX14	ENSG00000168875	Sox	MA1562.1	NA	cluster_1_contacting_ocrs	not_differential
515	MA1593.1	MA1593.1	1.68493	1	0.0561622	1	MA15931	ZNF317	ZNF317	ENSG00000130803	C2H2 ZF	MA1593.1	NA	cluster_1_contacting_ocrs	1
516	MA0836.2	MA0836.2	0.872943	1	0.0514622	1	MA08362	CEBPD	CEBPD	ENSG00000221869	bZIP	MA0836.2	NA	cluster_1_contacting_ocrs	not_differential
517	MA1534.1	MA1534.1	0.9106	1	0.069455	1	MA15341	NR1I3	NR1I3	ENSG00000143257	Nuclear receptor	MA1534.1	NA	cluster_1_contacting_ocrs	not_differential
518	MA0019.1	MA0019.1	0.732615	1	0.0583935	1	MA00191	Ddit3::Cebpa	DDIT3	ENSG00000175197	bZIP	MA0019.1	NA	cluster_1_contacting_ocrs	1
518	MA0019.1	MA0019.1	0.732615	1	0.0583935	1	MA00191	Ddit3::Cebpa	CEBPA	ENSG00000245848	bZIP	MA0019.1	NA	cluster_1_contacting_ocrs	not_differential
519	MA0755.1	MA0755.1	0.245842	1	0.0440087	1	MA07551	CUX2	CUX2	ENSG00000111249	CUT,Homeodomain	MA0755.1	NA	cluster_1_contacting_ocrs	2
520	MA0789.1	MA0789.1	1.36453	1	0.0375047	1	MA07891	POU3F4	POU3F4	ENSG00000196767	Homeodomain,POU	MA0789.1	NA	cluster_1_contacting_ocrs	not_differential
521	MA0713.1	MA0713.1	1.04585	1	0.037932	1	MA07131	PHOX2A	PHOX2A	ENSG00000165462	Homeodomain	MA0713.1	NA	cluster_1_contacting_ocrs	not_differential
522	MA1568.1	MA1568.1	0.544722	1	0.0412552	1	MA15681	TCF21(var.2)	TCF21	ENSG00000118526	bHLH	MA1568.1	NA	cluster_1_contacting_ocrs	not_differential
523	MA0845.1	MA0845.1	1.57657	1	0.0471895	1	MA08451	FOXB1	FOXB1	ENSG00000171956	Forkhead	MA0845.1	NA	cluster_1_contacting_ocrs	2
524	MA0774.1	MA0774.1	1.14065	1	0.0800893	1	MA07741	MEIS2	MEIS2	ENSG00000134138	Homeodomain	MA0774.1	NA	cluster_1_contacting_ocrs	2
525	MA0071.1	MA0071.1	0.904613	1	0.0548804	1	MA00711	RORA	RORA	ENSG00000069667	Nuclear receptor	MA0071.1	NA	cluster_1_contacting_ocrs	4
526	MA1110.1	MA1110.1	0.682815	1	0.0434865	1	MA11101	NR1H4	NR1H4	ENSG00000012504	Nuclear receptor	MA1110.1	NA	cluster_1_contacting_ocrs	not_differential
527.5	MA0467.1	MA0467.1	0.908503	1	0.0465724	1	MA04671	Crx	CRX	ENSG00000105392	Homeodomain	MA0467.1	NA	cluster_1_contacting_ocrs	2
527.5	MA0124.2	MA0124.2	0.875037	1	0.063948	1	MA01242	Nkx3-1	NKX3-1	ENSG00000167034	Homeodomain	MA0124.2	NA	cluster_1_contacting_ocrs	not_differential
529	MA0117.2	MA0117.2	1.07517	1	0.0570642	1	MA01172	Mafb	MAFB	ENSG00000204103	bZIP	MA0117.2	NA	cluster_1_contacting_ocrs	4
530	MA1141.1	MA1141.1	2.60157	1	0.0673186	1	MA11411	FOS::JUND	FOS	ENSG00000170345	bZIP	MA1141.1	NA	cluster_1_contacting_ocrs	1
530	MA1141.1	MA1141.1	2.60157	1	0.0673186	1	MA11411	FOS::JUND	JUND	ENSG00000130522	bZIP	MA1141.1	NA	cluster_1_contacting_ocrs	3
531.5	MA0669.1	MA0669.1	0.480281	1	0.0234523	1	MA06691	NEUROG2	NEUROG2	ENSG00000178403	bHLH	MA0669.1	NA	cluster_1_contacting_ocrs	not_differential
531.5	MA1647.1	MA1647.1	1.89203	1	0.0805165	1	MA16471	PRDM4	PRDM4	ENSG00000110851	C2H2 ZF	MA1647.1	NA	cluster_1_contacting_ocrs	1
533	MA1463.1	MA1463.1	0.759705	1	0.0289594	1	MA14631	ARGFX	ARGFX	ENSG00000186103	Homeodomain	MA1463.1	NA	cluster_1_contacting_ocrs	not_differential
534.5	MA0849.1	MA0849.1	0.989598	1	0.0736802	1	MA08491	FOXO6	FOXO6	ENSG00000204060	Forkhead	MA0849.1	NA	cluster_1_contacting_ocrs	not_differential
534.5	MA0067.1	MA0067.1	0.815339	1	0.0720661	1	MA00671	Pax2	PAX2	ENSG00000075891	Homeodomain,Paired box	MA0067.1	NA	cluster_1_contacting_ocrs	not_differential
537.5	MA1134.1	MA1134.1	2.78885	1	0.0612894	1	MA11341	FOS::JUNB	FOS	ENSG00000170345	bZIP	MA1134.1	NA	cluster_1_contacting_ocrs	1
537.5	MA1134.1	MA1134.1	2.78885	1	0.0612894	1	MA11341	FOS::JUNB	JUNB	ENSG00000171223	bZIP	MA1134.1	NA	cluster_1_contacting_ocrs	1
537.5	MA0032.2	MA0032.2	1.78069	1	0.0567319	1	MA00322	FOXC1	FOXC1	ENSG00000054598	Forkhead	MA0032.2	NA	cluster_1_contacting_ocrs	not_differential
537.5	MA0042.2	MA0042.2	0.974952	1	0.068553	1	MA00422	FOXI1	FOXI1	ENSG00000168269	Forkhead	MA0042.2	NA	cluster_1_contacting_ocrs	not_differential
537.5	MA1123.2	MA1123.2	1.29495	1	0.0541208	1	MA11232	TWIST1	TWIST1	ENSG00000122691	bHLH	MA1123.2	NA	cluster_1_contacting_ocrs	not_differential
643	MA0634.1	MA0634.1	0.764678	1	0.0310482	1	MA06341	ALX3	ALX3	ENSG00000156150	Homeodomain	MA0634.1	NA	cluster_1_contacting_ocrs	not_differential
643	MA0151.1	MA0151.1	0.967211	1	0.0845044	1	MA01511	Arid3a	ARID3A	ENSG00000116017	ARID/BRIGHT	MA0151.1	NA	cluster_1_contacting_ocrs	4
643	MA0601.1	MA0601.1	1.21988	1	0.0577288	1	MA06011	Arid3b	ARID3B	ENSG00000179361	ARID/BRIGHT	MA0601.1	NA	cluster_1_contacting_ocrs	not_differential
643	MA0602.1	MA0602.1	0.964676	1	0.0540258	1	MA06021	Arid5a	ARID5A	ENSG00000196843	ARID/BRIGHT	MA0602.1	NA	cluster_1_contacting_ocrs	not_differential
643	MA0461.2	MA0461.2	0.655924	1	0.0439138	1	MA04612	Atoh1	ATOH1	ENSG00000172238	bHLH	MA0461.2	NA	cluster_1_contacting_ocrs	not_differential
643	MA1468.1	MA1468.1	0.748712	1	0.0498006	1	MA14681	ATOH7	ATOH7	ENSG00000179774	bHLH	MA1468.1	NA	cluster_1_contacting_ocrs	not_differential
643	MA0877.2	MA0877.2	0.467883	1	0.0716863	1	MA08772	BARHL1	BARHL1	ENSG00000125492	Homeodomain	MA0877.2	NA	cluster_1_contacting_ocrs	not_differential
643	MA0635.1	MA0635.1	0.558805	1	0.0696449	1	MA06351	BARHL2	BARHL2	ENSG00000143032	Homeodomain	MA0635.1	NA	cluster_1_contacting_ocrs	not_differential
643	MA0875.1	MA0875.1	0.540975	1	0.0497057	1	MA08751	BARX1	BARX1	ENSG00000131668	Homeodomain	MA0875.1	NA	cluster_1_contacting_ocrs	not_differential
643	MA1471.1	MA1471.1	0.997869	1	0.0607672	1	MA14711	BARX2	BARX2	ENSG00000043039	Homeodomain	MA1471.1	NA	cluster_1_contacting_ocrs	not_differential
643	MA1634.1	MA1634.1	2.34589	1	0.0835549	1	MA16341	BATF	BATF	ENSG00000156127	bZIP	MA1634.1	NA	cluster_1_contacting_ocrs	1
643	MA0462.2	MA0462.2	2.39017	1	0.0817983	1	MA04622	BATF::JUN	BATF	ENSG00000156127	bZIP	MA0462.2	NA	cluster_1_contacting_ocrs	1
643	MA0462.2	MA0462.2	2.39017	1	0.0817983	1	MA04622	BATF::JUN	JUN	ENSG00000177606	bZIP	MA0462.2	NA	cluster_1_contacting_ocrs	2
643	MA0835.2	MA0835.2	2.38662	1	0.0748196	1	MA08352	BATF3	BATF3	ENSG00000123685	bZIP	MA0835.2	NA	cluster_1_contacting_ocrs	1
643	MA0607.1	MA0607.1	0.88232	1	0.0739176	1	MA06071	Bhlha15	BHLHA15	ENSG00000180535	bHLH	MA0607.1	NA	cluster_1_contacting_ocrs	not_differential
643	MA0818.1	MA0818.1	0.47833	1	0.0222655	1	MA08181	BHLHE22	BHLHE22	ENSG00000180828	bHLH	MA0818.1	NA	cluster_1_contacting_ocrs	not_differential
643	MA0876.1	MA0876.1	0.540093	1	0.034229	1	MA08761	BSX	BSX	ENSG00000188909	Homeodomain	MA0876.1	NA	cluster_1_contacting_ocrs	not_differential
643	MA0465.2	MA0465.2	1.38026	1	0.0460976	1	MA04652	CDX2	CDX2	ENSG00000165556	Homeodomain	MA0465.2	NA	cluster_1_contacting_ocrs	not_differential
643	MA0754.1	MA0754.1	0.257465	1	0.0474269	1	MA07541	CUX1	CUX1	ENSG00000257923	CUT,Homeodomain	MA0754.1	NA	cluster_1_contacting_ocrs	not_differential
643	MA0879.1	MA0879.1	0.842685	1	0.0509875	1	MA08791	Dlx1	DLX1	ENSG00000144355	Homeodomain	MA0879.1	NA	cluster_1_contacting_ocrs	not_differential
643	MA0885.1	MA0885.1	0.649073	1	0.0438663	1	MA08851	Dlx2	DLX2	ENSG00000115844	Homeodomain	MA0885.1	NA	cluster_1_contacting_ocrs	not_differential
643	MA0880.1	MA0880.1	0.705998	1	0.0328048	1	MA08801	Dlx3	DLX3	ENSG00000064195	Homeodomain	MA0880.1	NA	cluster_1_contacting_ocrs	not_differential
643	MA0881.1	MA0881.1	0.685046	1	0.0340866	1	MA08811	Dlx4	DLX4	ENSG00000108813	Homeodomain	MA0881.1	NA	cluster_1_contacting_ocrs	not_differential
643	MA1476.1	MA1476.1	0.559184	1	0.0603399	1	MA14761	DLX5	DLX5	ENSG00000105880	Homeodomain	MA1476.1	NA	cluster_1_contacting_ocrs	not_differential
643	MA0882.1	MA0882.1	0.669227	1	0.0363179	1	MA08821	DLX6	DLX6	ENSG00000006377	Homeodomain	MA0882.1	NA	cluster_1_contacting_ocrs	not_differential
643	MA0610.1	MA0610.1	0.609993	1	0.0585834	1	MA06101	DMRT3	DMRT3	ENSG00000064218	DM	MA0610.1	NA	cluster_1_contacting_ocrs	not_differential
643	MA1478.1	MA1478.1	0.764904	1	0.0577763	1	MA14781	DMRTA2	DMRTA2	ENSG00000142700	DM	MA1478.1	NA	cluster_1_contacting_ocrs	not_differential
643	MA1479.1	MA1479.1	0.812181	1	0.0476643	1	MA14791	DMRTC2	DMRTC2	ENSG00000142025	DM	MA1479.1	NA	cluster_1_contacting_ocrs	not_differential
643	MA1480.1	MA1480.1	0.528739	1	0.0525541	1	MA14801	DPRX	DPRX	ENSG00000204595	Homeodomain	MA1480.1	NA	cluster_1_contacting_ocrs	not_differential
643	MA1481.1	MA1481.1	0.603753	1	0.0391664	1	MA14811	DRGX	DRGX	ENSG00000165606	Homeodomain	MA1481.1	NA	cluster_1_contacting_ocrs	not_differential
643	MA0611.1	MA0611.1	0.730591	1	0.0819408	1	MA06111	Dux	NA	NA	NA	MA0611.1	NA	cluster_1_contacting_ocrs	not_differential
643	MA0468.1	MA0468.1	1.15105	1	0.0326624	1	MA04681	DUX4	DUX4	ENSG00000260596	Homeodomain	MA0468.1	NA	cluster_1_contacting_ocrs	not_differential
643	MA0884.1	MA0884.1	0.897374	1	0.0401158	1	MA08841	DUXA	DUXA	ENSG00000258873	Homeodomain	MA0884.1	NA	cluster_1_contacting_ocrs	not_differential
643	MA0612.2	MA0612.2	0.584368	1	0.0334694	1	MA06122	EMX1	EMX1	ENSG00000135638	Homeodomain	MA0612.2	NA	cluster_1_contacting_ocrs	not_differential
643	MA0886.1	MA0886.1	0.586208	1	0.03233	1	MA08861	EMX2	EMX2	ENSG00000170370	Homeodomain	MA0886.1	NA	cluster_1_contacting_ocrs	not_differential
643	MA0027.2	MA0027.2	0.627102	1	0.0272028	1	MA00272	EN1	EN1	ENSG00000163064	Homeodomain	MA0027.2	NA	cluster_1_contacting_ocrs	not_differential
643	MA0642.1	MA0642.1	0.564379	1	0.0335169	1	MA06421	EN2	EN2	ENSG00000164778	Homeodomain	MA0642.1	NA	cluster_1_contacting_ocrs	2
643	MA0644.1	MA0644.1	0.69031	1	0.0225503	1	MA06441	ESX1	ESX1	ENSG00000123576	Homeodomain	MA0644.1	NA	cluster_1_contacting_ocrs	not_differential
643	MA0887.1	MA0887.1	0.592806	1	0.0357007	1	MA08871	EVX1	EVX1	ENSG00000106038	Homeodomain	MA0887.1	NA	cluster_1_contacting_ocrs	2
643	MA0888.1	MA0888.1	0.591161	1	0.0341815	1	MA08881	EVX2	EVX2	ENSG00000174279	Homeodomain	MA0888.1	NA	cluster_1_contacting_ocrs	not_differential
643	MA0476.1	MA0476.1	3.36622	1	0.0841246	1	MA04761	FOS	FOS	ENSG00000170345	bZIP	MA0476.1	NA	cluster_1_contacting_ocrs	1
643	MA0099.3	MA0099.3	2.35654	1	0.0714014	1	MA00993	FOS::JUN	FOS	ENSG00000170345	bZIP	MA0099.3	NA	cluster_1_contacting_ocrs	1
643	MA0099.3	MA0099.3	2.35654	1	0.0714014	1	MA00993	FOS::JUN	JUN	ENSG00000177606	bZIP	MA0099.3	NA	cluster_1_contacting_ocrs	2
643	MA1135.1	MA1135.1	2.65672	1	0.0701196	1	MA11351	FOSB::JUNB	FOSB	ENSG00000125740	bZIP	MA1135.1	NA	cluster_1_contacting_ocrs	1
643	MA1135.1	MA1135.1	2.65672	1	0.0701196	1	MA11351	FOSB::JUNB	JUNB	ENSG00000171223	bZIP	MA1135.1	NA	cluster_1_contacting_ocrs	1
643	MA0477.2	MA0477.2	2.90322	1	0.0634732	1	MA04772	FOSL1	FOSL1	ENSG00000175592	bZIP	MA0477.2	NA	cluster_1_contacting_ocrs	1
643	MA1128.1	MA1128.1	2.34866	1	0.0712115	1	MA11281	FOSL1::JUN	FOSL1	ENSG00000175592	bZIP	MA1128.1	NA	cluster_1_contacting_ocrs	1
643	MA1128.1	MA1128.1	2.34866	1	0.0712115	1	MA11281	FOSL1::JUN	JUN	ENSG00000177606	bZIP	MA1128.1	NA	cluster_1_contacting_ocrs	2
643	MA1137.1	MA1137.1	1.7741	1	0.0739176	1	MA11371	FOSL1::JUNB	FOSL1	ENSG00000175592	bZIP	MA1137.1	NA	cluster_1_contacting_ocrs	1
643	MA1137.1	MA1137.1	1.7741	1	0.0739176	1	MA11371	FOSL1::JUNB	JUNB	ENSG00000171223	bZIP	MA1137.1	NA	cluster_1_contacting_ocrs	1
643	MA1142.1	MA1142.1	1.39756	1	0.0717812	1	MA11421	FOSL1::JUND	FOSL1	ENSG00000175592	bZIP	MA1142.1	NA	cluster_1_contacting_ocrs	1
643	MA1142.1	MA1142.1	1.39756	1	0.0717812	1	MA11421	FOSL1::JUND	JUND	ENSG00000130522	bZIP	MA1142.1	NA	cluster_1_contacting_ocrs	3
643	MA1130.1	MA1130.1	2.44541	1	0.0789024	1	MA11301	FOSL2::JUN	FOSL2	ENSG00000075426	bZIP	MA1130.1	NA	cluster_1_contacting_ocrs	1
643	MA1130.1	MA1130.1	2.44541	1	0.0789024	1	MA11301	FOSL2::JUN	JUN	ENSG00000177606	bZIP	MA1130.1	NA	cluster_1_contacting_ocrs	2
643	MA1138.1	MA1138.1	2.73591	1	0.0686479	1	MA11381	FOSL2::JUNB	FOSL2	ENSG00000075426	bZIP	MA1138.1	NA	cluster_1_contacting_ocrs	1
643	MA1138.1	MA1138.1	2.73591	1	0.0686479	1	MA11381	FOSL2::JUNB	JUNB	ENSG00000171223	bZIP	MA1138.1	NA	cluster_1_contacting_ocrs	1
643	MA1144.1	MA1144.1	2.76009	1	0.0655146	1	MA11441	FOSL2::JUND	FOSL2	ENSG00000075426	bZIP	MA1144.1	NA	cluster_1_contacting_ocrs	1
643	MA1144.1	MA1144.1	2.76009	1	0.0655146	1	MA11441	FOSL2::JUND	JUND	ENSG00000130522	bZIP	MA1144.1	NA	cluster_1_contacting_ocrs	3
643	MA0148.4	MA0148.4	1.25657	1	0.0406855	1	MA01484	FOXA1	FOXA1	ENSG00000129514	Forkhead	MA0148.4	NA	cluster_1_contacting_ocrs	2
643	MA0047.3	MA0047.3	1.2224	1	0.0548804	1	MA00473	FOXA2	FOXA2	ENSG00000125798	Forkhead	MA0047.3	NA	cluster_1_contacting_ocrs	not_differential
643	MA1683.1	MA1683.1	1.1877	1	0.0526491	1	MA16831	FOXA3	FOXA3	ENSG00000170608	Forkhead	MA1683.1	NA	cluster_1_contacting_ocrs	not_differential
643	MA0031.1	MA0031.1	0.948065	1	0.053741	1	MA00311	FOXD1	FOXD1	ENSG00000251493	Forkhead	MA0031.1	NA	cluster_1_contacting_ocrs	not_differential
643	MA1606.1	MA1606.1	1.29199	1	0.0633308	1	MA16061	Foxf1	FOXF1	ENSG00000103241	Forkhead	MA1606.1	NA	cluster_1_contacting_ocrs	2
643	MA0613.1	MA0613.1	1.07073	1	0.074962	1	MA06131	FOXG1	FOXG1	ENSG00000176165	Forkhead	MA0613.1	NA	cluster_1_contacting_ocrs	not_differential
643	MA0614.1	MA0614.1	1.15533	1	0.06936	1	MA06141	Foxj2	FOXJ2	ENSG00000065970	Forkhead	MA0614.1	NA	cluster_1_contacting_ocrs	5
643	MA1103.2	MA1103.2	1.17649	1	0.0541208	1	MA11032	FOXK2	FOXK2	ENSG00000141568	Forkhead	MA1103.2	NA	cluster_1_contacting_ocrs	1
643	MA0033.2	MA0033.2	1.05299	1	0.0848842	1	MA00332	FOXL1	FOXL1	ENSG00000176678	Forkhead	MA0033.2	NA	cluster_1_contacting_ocrs	2
643	MA0848.1	MA0848.1	1.03078	1	0.0724934	1	MA08481	FOXO4	FOXO4	ENSG00000184481	Forkhead	MA0848.1	NA	cluster_1_contacting_ocrs	4
643	MA0481.3	MA0481.3	1.20569	1	0.053741	1	MA04813	FOXP1	FOXP1	ENSG00000114861	Forkhead	MA0481.3	NA	cluster_1_contacting_ocrs	1
643	MA0850.1	MA0850.1	0.995063	1	0.0680782	1	MA08501	FOXP3	FOXP3	ENSG00000049768	Forkhead	MA0850.1	NA	cluster_1_contacting_ocrs	5
643	MA0040.1	MA0040.1	1.22241	1	0.0456703	1	MA00401	Foxq1	FOXQ1	ENSG00000164379	Forkhead	MA0040.1	NA	cluster_1_contacting_ocrs	not_differential
643	MA0035.4	MA0035.4	0.841535	1	0.0580137	1	MA00354	GATA1	GATA1	ENSG00000102145	GATA	MA0035.4	NA	cluster_1_contacting_ocrs	not_differential
643	MA0036.3	MA0036.3	0.985447	1	0.0681732	1	MA00363	GATA2	GATA2	ENSG00000179348	GATA	MA0036.3	NA	cluster_1_contacting_ocrs	not_differential
643	MA0037.3	MA0037.3	0.646359	1	0.0859286	1	MA00373	GATA3	GATA3	ENSG00000107485	GATA	MA0037.3	NA	cluster_1_contacting_ocrs	not_differential
643	MA0482.2	MA0482.2	1.31336	1	0.0527915	1	MA04822	GATA4	GATA4	ENSG00000136574	GATA	MA0482.2	NA	cluster_1_contacting_ocrs	not_differential
643	MA0766.2	MA0766.2	0.665915	1	0.0822256	1	MA07662	GATA5	GATA5	ENSG00000130700	GATA	MA0766.2	NA	cluster_1_contacting_ocrs	not_differential
643	MA1104.2	MA1104.2	1.22631	1	0.0540733	1	MA11042	GATA6	GATA6	ENSG00000141448	GATA	MA1104.2	NA	cluster_1_contacting_ocrs	not_differential
643	MA0889.1	MA0889.1	0.504329	1	0.034229	1	MA08891	GBX1	GBX1	ENSG00000164900	Homeodomain	MA0889.1	NA	cluster_1_contacting_ocrs	not_differential
643	MA0890.1	MA0890.1	0.576876	1	0.0383593	1	MA08901	GBX2	GBX2	ENSG00000168505	Homeodomain	MA0890.1	NA	cluster_1_contacting_ocrs	not_differential
643	MA0648.1	MA0648.1	0.542485	1	0.0554975	1	MA06481	GSC	GSC	ENSG00000133937	Homeodomain	MA0648.1	NA	cluster_1_contacting_ocrs	not_differential
643	MA0891.1	MA0891.1	0.602114	1	0.0521269	1	MA08911	GSC2	GSC2	ENSG00000063515	Homeodomain	MA0891.1	NA	cluster_1_contacting_ocrs	not_differential
643	MA0892.1	MA0892.1	0.742995	1	0.0239271	1	MA08921	GSX1	GSX1	ENSG00000169840	Homeodomain	MA0892.1	NA	cluster_1_contacting_ocrs	not_differential
643	MA0893.2	MA0893.2	0.592137	1	0.0383593	1	MA08932	GSX2	GSX2	ENSG00000180613	Homeodomain	MA0893.2	NA	cluster_1_contacting_ocrs	not_differential
643	MA0092.1	MA0092.1	1.17142	1	0.0668914	1	MA00921	Hand1::Tcf3	HAND1	ENSG00000113196	bHLH	MA0092.1	NA	cluster_1_contacting_ocrs	not_differential
643	MA0092.1	MA0092.1	1.17142	1	0.0668914	1	MA00921	Hand1::Tcf3	TCF3	ENSG00000071564	bHLH	MA0092.1	NA	cluster_1_contacting_ocrs	3
643	MA1638.1	MA1638.1	1.28235	1	0.107245	1	MA16381	HAND2	HAND2	ENSG00000164107	bHLH	MA1638.1	NA	cluster_1_contacting_ocrs	not_differential
643	MA0894.1	MA0894.1	0.6082	1	0.0403057	1	MA08941	HESX1	HESX1	ENSG00000163666	Homeodomain	MA0894.1	NA	cluster_1_contacting_ocrs	not_differential
643	MA0109.1	MA0109.1	0.934662	1	0.0600076	1	MA01091	HLTF	HLTF	ENSG00000071794	NA	MA0109.1	NA	cluster_1_contacting_ocrs	4
643	MA0895.1	MA0895.1	0.56249	1	0.0587733	1	MA08951	HMBOX1	HMBOX1	ENSG00000147421	Homeodomain	MA0895.1	NA	cluster_1_contacting_ocrs	not_differential
643	MA1495.1	MA1495.1	0.627662	1	0.0333745	1	MA14951	HOXA1	HOXA1	ENSG00000105991	Homeodomain	MA1495.1	NA	cluster_1_contacting_ocrs	not_differential
643	MA0899.1	MA0899.1	1.08953	1	0.0526016	1	MA08991	HOXA10	HOXA10	ENSG00000253293	Homeodomain	MA0899.1	NA	cluster_1_contacting_ocrs	not_differential
643	MA0900.2	MA0900.2	0.60252	1	0.0481865	1	MA09002	HOXA2	HOXA2	ENSG00000105996	Homeodomain	MA0900.2	NA	cluster_1_contacting_ocrs	not_differential
643	MA1496.1	MA1496.1	0.572497	1	0.0509875	1	MA14961	HOXA4	HOXA4	ENSG00000197576	Homeodomain	MA1496.1	NA	cluster_1_contacting_ocrs	not_differential
643	MA0158.2	MA0158.2	0.600284	1	0.0500855	1	MA01582	HOXA5	HOXA5	ENSG00000106004	Homeodomain	MA0158.2	NA	cluster_1_contacting_ocrs	not_differential
643	MA1497.1	MA1497.1	0.615249	1	0.0342765	1	MA14971	HOXA6	HOXA6	ENSG00000106006	Homeodomain	MA1497.1	NA	cluster_1_contacting_ocrs	not_differential
643	MA1498.1	MA1498.1	0.60793	1	0.0415401	1	MA14981	HOXA7	HOXA7	ENSG00000122592	Homeodomain	MA1498.1	NA	cluster_1_contacting_ocrs	2
643	MA0594.2	MA0594.2	0.355381	1	0.0627136	1	MA05942	HOXA9	HOXA9	ENSG00000078399	Homeodomain	MA0594.2	NA	cluster_1_contacting_ocrs	not_differential
643	MA0902.2	MA0902.2	0.626105	1	0.0401158	1	MA09022	HOXB2	HOXB2	ENSG00000173917	Homeodomain	MA0902.2	NA	cluster_1_contacting_ocrs	not_differential
643	MA0903.1	MA0903.1	0.698609	1	0.024117	1	MA09031	HOXB3	HOXB3	ENSG00000120093	Homeodomain	MA0903.1	NA	cluster_1_contacting_ocrs	not_differential
643	MA1499.1	MA1499.1	0.644443	1	0.0597702	1	MA14991	HOXB4	HOXB4	ENSG00000182742	Homeodomain	MA1499.1	NA	cluster_1_contacting_ocrs	5
643	MA0904.2	MA0904.2	0.609425	1	0.0452905	1	MA09042	HOXB5	HOXB5	ENSG00000120075	Homeodomain	MA0904.2	NA	cluster_1_contacting_ocrs	not_differential
643	MA1500.1	MA1500.1	0.610415	1	0.040733	1	MA15001	HOXB6	HOXB6	ENSG00000108511	Homeodomain	MA1500.1	NA	cluster_1_contacting_ocrs	not_differential
643	MA1501.1	MA1501.1	0.546691	1	0.0441512	1	MA15011	HOXB7	HOXB7	ENSG00000260027	Homeodomain	MA1501.1	NA	cluster_1_contacting_ocrs	not_differential
643	MA1502.1	MA1502.1	0.599285	1	0.0507976	1	MA15021	HOXB8	HOXB8	ENSG00000120068	Homeodomain	MA1502.1	NA	cluster_1_contacting_ocrs	not_differential
643	MA0905.1	MA0905.1	0.594884	1	0.052839	1	MA09051	HOXC10	HOXC10	ENSG00000180818	Homeodomain	MA0905.1	NA	cluster_1_contacting_ocrs	not_differential
643	MA1504.1	MA1504.1	0.640778	1	0.0554975	1	MA15041	HOXC4	HOXC4	ENSG00000198353	Homeodomain	MA1504.1	NA	cluster_1_contacting_ocrs	not_differential
643	MA1505.1	MA1505.1	0.647005	1	0.0393562	1	MA15051	HOXC8	HOXC8	ENSG00000037965	Homeodomain	MA1505.1	NA	cluster_1_contacting_ocrs	not_differential
643	MA0912.2	MA0912.2	0.553779	1	0.0375522	1	MA09122	HOXD3	HOXD3	ENSG00000128652	Homeodomain	MA0912.2	NA	cluster_1_contacting_ocrs	not_differential
643	MA1507.1	MA1507.1	0.631626	1	0.0581561	1	MA15071	HOXD4	HOXD4	ENSG00000170166	Homeodomain	MA1507.1	NA	cluster_1_contacting_ocrs	not_differential
643	MA0910.2	MA0910.2	0.595143	1	0.049041	1	MA09102	HOXD8	HOXD8	ENSG00000175879	Homeodomain	MA0910.2	NA	cluster_1_contacting_ocrs	not_differential
643	MA0913.2	MA0913.2	1.04336	1	0.0453855	1	MA09132	HOXD9	HOXD9	ENSG00000128709	Homeodomain	MA0913.2	NA	cluster_1_contacting_ocrs	not_differential
643	MA1608.1	MA1608.1	0.546874	1	0.0518895	1	MA16081	Isl1	ISL1	ENSG00000016082	Homeodomain	MA1608.1	NA	cluster_1_contacting_ocrs	not_differential
643	MA0914.1	MA0914.1	0.801331	1	0.05564	1	MA09141	ISL2	ISL2	ENSG00000159556	Homeodomain	MA0914.1	NA	cluster_1_contacting_ocrs	2
643	MA0654.1	MA0654.1	0.624371	1	0.0458128	1	MA06541	ISX	ISX	ENSG00000175329	Homeodomain	MA0654.1	NA	cluster_1_contacting_ocrs	not_differential
643	MA0655.1	MA0655.1	3.12328	1	0.0322826	1	MA06551	JDP2	JDP2	ENSG00000140044	bZIP	MA0655.1	NA	cluster_1_contacting_ocrs	not_differential
643	MA1132.1	MA1132.1	1.43868	1	0.0654671	1	MA11321	JUN::JUNB	JUN	ENSG00000177606	bZIP	MA1132.1	NA	cluster_1_contacting_ocrs	2
643	MA1132.1	MA1132.1	1.43868	1	0.0654671	1	MA11321	JUN::JUNB	JUNB	ENSG00000171223	bZIP	MA1132.1	NA	cluster_1_contacting_ocrs	1
643	MA0490.2	MA0490.2	2.86061	1	0.0522218	1	MA04902	JUNB	JUNB	ENSG00000171223	bZIP	MA0490.2	NA	cluster_1_contacting_ocrs	1
643	MA0491.2	MA0491.2	2.93316	1	0.0504652	1	MA04912	JUND	JUND	ENSG00000130522	bZIP	MA0491.2	NA	cluster_1_contacting_ocrs	3
643	MA0618.1	MA0618.1	0.585828	1	0.0458128	1	MA06181	LBX1	LBX1	ENSG00000138136	Homeodomain	MA0618.1	NA	cluster_1_contacting_ocrs	not_differential
643	MA0699.1	MA0699.1	0.656638	1	0.0244968	1	MA06991	LBX2	LBX2	ENSG00000179528	Homeodomain	MA0699.1	NA	cluster_1_contacting_ocrs	not_differential
643	MA1518.1	MA1518.1	0.678553	1	0.0310957	1	MA15181	LHX1	LHX1	ENSG00000273706	Homeodomain	MA1518.1	NA	cluster_1_contacting_ocrs	not_differential
643	MA0700.2	MA0700.2	0.659269	1	0.0486137	1	MA07002	LHX2	LHX2	ENSG00000106689	Homeodomain	MA0700.2	NA	cluster_1_contacting_ocrs	not_differential
643	MA0704.1	MA0704.1	0.740566	1	0.0298614	1	MA07041	Lhx4	LHX4	ENSG00000121454	Homeodomain	MA0704.1	NA	cluster_1_contacting_ocrs	not_differential
643	MA1519.1	MA1519.1	0.597527	1	0.0470946	1	MA15191	LHX5	LHX5	ENSG00000089116	Homeodomain	MA1519.1	NA	cluster_1_contacting_ocrs	not_differential
643	MA0658.1	MA0658.1	0.557542	1	0.0316179	1	MA06581	LHX6	LHX6	ENSG00000106852	Homeodomain	MA0658.1	NA	cluster_1_contacting_ocrs	not_differential
643	MA0705.1	MA0705.1	0.54887	1	0.043439	1	MA07051	Lhx8	LHX8	ENSG00000162624	Homeodomain	MA0705.1	NA	cluster_1_contacting_ocrs	not_differential
643	MA0701.2	MA0701.2	0.585043	1	0.0359381	1	MA07012	LHX9	LHX9	ENSG00000143355	Homeodomain	MA0701.2	NA	cluster_1_contacting_ocrs	not_differential
643	MA0619.1	MA0619.1	1.51952	1	0.100408	1	MA06191	LIN54	LIN54	ENSG00000189308	TCR/CxC	MA0619.1	NA	cluster_1_contacting_ocrs	5
643	MA0498.2	MA0498.2	0.979146	1	0.0843619	1	MA04982	MEIS1	MEIS1	ENSG00000143995	Homeodomain	MA0498.2	NA	cluster_1_contacting_ocrs	2
643	MA1639.1	MA1639.1	0.887568	1	0.0431067	1	MA16391	MEIS1(var.2)	MEIS1	ENSG00000143995	Homeodomain	MA1639.1	NA	cluster_1_contacting_ocrs	2
643	MA1640.1	MA1640.1	1.03842	1	0.0439613	1	MA16401	MEIS2(var.2)	MEIS2	ENSG00000134138	Homeodomain	MA1640.1	NA	cluster_1_contacting_ocrs	2
643	MA0775.1	MA0775.1	1.0067	1	0.0837923	1	MA07751	MEIS3	MEIS3	ENSG00000105419	Homeodomain	MA0775.1	NA	cluster_1_contacting_ocrs	not_differential
643	MA0661.1	MA0661.1	0.580109	1	0.0369825	1	MA06611	MEOX1	MEOX1	ENSG00000005102	Homeodomain	MA0661.1	NA	cluster_1_contacting_ocrs	not_differential
643	MA0706.1	MA0706.1	0.71271	1	0.0323775	1	MA07061	MEOX2	MEOX2	ENSG00000106511	Homeodomain	MA0706.1	NA	cluster_1_contacting_ocrs	not_differential
643	MA0621.1	MA0621.1	0.763964	1	0.039736	1	MA06211	mix-a	NA	NA	NA	MA0621.1	NA	cluster_1_contacting_ocrs	not_differential
643	MA0662.1	MA0662.1	0.725711	1	0.0282947	1	MA06621	MIXL1	MIXL1	ENSG00000185155	Homeodomain	MA0662.1	NA	cluster_1_contacting_ocrs	not_differential
643	MA0707.1	MA0707.1	0.836775	1	0.0396886	1	MA07071	MNX1	MNX1	ENSG00000130675	Homeodomain	MA0707.1	NA	cluster_1_contacting_ocrs	not_differential
643	MA1524.1	MA1524.1	0.747547	1	0.0646601	1	MA15241	MSGN1	MSGN1	ENSG00000151379	bHLH	MA1524.1	NA	cluster_1_contacting_ocrs	not_differential
643	MA0666.1	MA0666.1	0.610263	1	0.0368401	1	MA06661	MSX1	MSX1	ENSG00000163132	Homeodomain	MA0666.1	NA	cluster_1_contacting_ocrs	not_differential
643	MA0708.1	MA0708.1	0.584311	1	0.0446259	1	MA07081	MSX2	MSX2	ENSG00000120149	Homeodomain	MA0708.1	NA	cluster_1_contacting_ocrs	not_differential
643	MA0709.1	MA0709.1	0.593959	1	0.0479966	1	MA07091	Msx3	NA	NA	NA	MA0709.1	NA	cluster_1_contacting_ocrs	not_differential
643	MA1108.2	MA1108.2	1.12165	1	0.0963255	1	MA11082	MXI1	MXI1	ENSG00000119950	bHLH	MA1108.2	NA	cluster_1_contacting_ocrs	not_differential
643	MA0100.3	MA0100.3	0.826902	1	0.0974174	1	MA01003	MYB	MYB	ENSG00000118513	Myb/SANT	MA0100.3	NA	cluster_1_contacting_ocrs	1
643	MA0668.1	MA0668.1	0.493036	1	0.0419199	1	MA06681	NEUROD2	NEUROD2	ENSG00000171532	bHLH	MA0668.1	NA	cluster_1_contacting_ocrs	not_differential
643	MA0623.2	MA0623.2	0.456704	1	0.0231675	1	MA06232	NEUROG1	NEUROG1	ENSG00000181965	bHLH	MA0623.2	NA	cluster_1_contacting_ocrs	not_differential
643	MA0606.1	MA0606.1	1.82413	1	0.0665591	1	MA06061	NFAT5	NFAT5	ENSG00000102908	Rel	MA0606.1	NA	cluster_1_contacting_ocrs	1
643	MA0624.1	MA0624.1	1.22594	1	0.0754842	1	MA06241	NFATC1	NFATC1	ENSG00000131196	Rel	MA0624.1	NA	cluster_1_contacting_ocrs	3
643	MA0152.1	MA0152.1	1.73421	1	0.0760539	1	MA01521	NFATC2	NFATC2	ENSG00000101096	Rel	MA0152.1	NA	cluster_1_contacting_ocrs	not_differential
643	MA0625.1	MA0625.1	1.36936	1	0.0714014	1	MA06251	NFATC3	NFATC3	ENSG00000072736	Rel	MA0625.1	NA	cluster_1_contacting_ocrs	not_differential
643	MA0670.1	MA0670.1	0.941634	1	0.10169	1	MA06701	NFIA	NFIA	ENSG00000162599	SMAD	MA0670.1	NA	cluster_1_contacting_ocrs	4
643	MA0025.2	MA0025.2	0.910627	1	0.0474744	1	MA00252	NFIL3	NFIL3	ENSG00000165030	bZIP	MA0025.2	NA	cluster_1_contacting_ocrs	1
643	MA0672.1	MA0672.1	0.951006	1	0.0707368	1	MA06721	NKX2-3	NKX2-3	ENSG00000119919	Homeodomain	MA0672.1	NA	cluster_1_contacting_ocrs	not_differential
643	MA0063.2	MA0063.2	0.952901	1	0.0590581	1	MA00632	NKX2-5	NKX2-5	ENSG00000183072	Homeodomain	MA0063.2	NA	cluster_1_contacting_ocrs	not_differential
643	MA0673.1	MA0673.1	0.995743	1	0.0738226	1	MA06731	NKX2-8	NKX2-8	ENSG00000136327	Homeodomain	MA0673.1	NA	cluster_1_contacting_ocrs	2
643	MA0674.1	MA0674.1	0.734725	1	0.0447683	1	MA06741	NKX6-1	NKX6-1	ENSG00000163623	Homeodomain	MA0674.1	NA	cluster_1_contacting_ocrs	not_differential
643	MA0675.1	MA0675.1	0.746699	1	0.0335644	1	MA06751	NKX6-2	NKX6-2	ENSG00000148826	Homeodomain	MA0675.1	NA	cluster_1_contacting_ocrs	not_differential
643	MA1530.1	MA1530.1	0.723735	1	0.0650874	1	MA15301	NKX6-3	NKX6-3	ENSG00000165066	Homeodomain	MA1530.1	NA	cluster_1_contacting_ocrs	2
643	MA0125.1	MA0125.1	0.601238	1	0.0377421	1	MA01251	Nobox	NOBOX	ENSG00000106410	Homeodomain	MA0125.1	NA	cluster_1_contacting_ocrs	not_differential
643	MA0710.1	MA0710.1	0.716272	1	0.0442936	1	MA07101	NOTO	NOTO	ENSG00000214513	Homeodomain	MA0710.1	NA	cluster_1_contacting_ocrs	not_differential
643	MA0676.1	MA0676.1	1.34988	1	0.0596753	1	MA06761	Nr2e1	NR2E1	ENSG00000112333	Nuclear receptor	MA0676.1	NA	cluster_1_contacting_ocrs	not_differential
643	MA0164.1	MA0164.1	0.885001	1	0.0788549	1	MA01641	Nr2e3	NR2E3	ENSG00000278570	Nuclear receptor	MA0164.1	NA	cluster_1_contacting_ocrs	not_differential
643	MA0678.1	MA0678.1	0.513185	1	0.0281048	1	MA06781	OLIG2	OLIG2	ENSG00000205927	bHLH	MA0678.1	NA	cluster_1_contacting_ocrs	not_differential
643	MA0827.1	MA0827.1	0.60928	1	0.0393562	1	MA08271	OLIG3	OLIG3	ENSG00000177468	bHLH	MA0827.1	NA	cluster_1_contacting_ocrs	not_differential
643	MA0711.1	MA0711.1	0.462991	1	0.0789024	1	MA07111	OTX1	OTX1	ENSG00000115507	Homeodomain	MA0711.1	NA	cluster_1_contacting_ocrs	not_differential
643	MA0712.2	MA0712.2	0.845358	1	0.0696924	1	MA07122	OTX2	OTX2	ENSG00000165588	Homeodomain	MA0712.2	NA	cluster_1_contacting_ocrs	not_differential
643	MA0068.2	MA0068.2	0.566436	1	0.0357482	1	MA00682	PAX4	PAX4	ENSG00000106331	Homeodomain,Paired box	MA0068.2	NA	cluster_1_contacting_ocrs	not_differential
643	MA1113.2	MA1113.2	1.02831	1	0.0451481	1	MA11132	PBX2	PBX2	ENSG00000204304	Homeodomain	MA1113.2	NA	cluster_1_contacting_ocrs	4
[truncated: 3,223 more rows]

## Sheet: Sheet1
Pathway	observed	expected	p.val	p.adjust	genes	class	obs_exp
[truncated: 5,003 more rows]
