# Supplementary material for: Dynamic chromatin architecture identifies new autoimmune-associated enhancers for IL2 and novel genes regulating CD4+ T cell activation
Source: eLife. 2024 Sep 20;13:RP96852. doi: 10.7554/eLife.96852 (PMC11418197; doi:10.7554/eLife.96852)
Supplement: Supplementary file 12. [file elife-96852-supp12.xlsx]

## Sheet: Sheet1
Table S12: List of all GWAS studies included
Trait	id	sumStat GST	sumStat snp_n	EUR N	EUR case	EUR control
allergy	EFO_0003785	https://www.ebi.ac.uk/gwas/studies/GCST005038	136	360838	180129	180709
ankylosing spondylitis	EFO_0003898	https://www.ebi.ac.uk/gwas/studies/GCST005529	38	22647	9069	13578
atopic eczema	EFO_0000274	https://www.ebi.ac.uk/gwas/studies/GCST003184	10	121966	18900	103066
autoimmune thyroid disease	EFO_0006812	https://www.ebi.ac.uk/gwas/studies/GCST005524	40	12097	2733	9364
Crohn's disease	EFO_0000384	https://www.ebi.ac.uk/gwas/studies/GCST004132	115	40266	12194	28072
Celiac Disease	EFO_0001060	https://www.ebi.ac.uk/gwas/efotraits/EFO_0001060	40	15283	4533	10750
inflammatory bowel disease	EFO_0003767	https://www.ebi.ac.uk/gwas/studies/GCST004131	134	59957	25042	34915
juvenile idiopathic arthritis	EFO_0002609	https://www.ebi.ac.uk/gwas/studies/GCST005528	31	15872	2816	13056
multiple sclerosis	EFO_0003885	https://www.ebi.ac.uk/gwas/studies/GCST005531	125	38582	14498	24091
Psoriasis	EFO_0000676	https://www.ebi.ac.uk/gwas/studies/GCST005527	41	33394	10588	22806
rheumatoid arthritis	EFO_0000685	https://www.ebi.ac.uk/gwas/studies/GCST002318	87	58284	14361	42923
systemic lupus erythematosus	EFO_0002690	https://www.ebi.ac.uk/gwas/studies/GCST007400	64	18264	6748	11516
type I diabetes mellitus	EFO_0001359	https://www.ebi.ac.uk/gwas/studies/GCST005536	51	29652	6683	12173
ulcerative colitis	EFO_0000729	https://www.ebi.ac.uk/gwas/studies/GCST004133	134	45975	12366	33609
Vitiligo	EFO_0004208	https://www.ebi.ac.uk/gwas/studies/GCST004785	57	40258	2853	37405
