# Supplementary material for: Dynamic chromatin architecture identifies new autoimmune-associated enhancers for IL2 and novel genes regulating CD4+ T cell activation
Source: eLife. 2024 Sep 20;13:RP96852. doi: 10.7554/eLife.96852 (PMC11418197; doi:10.7554/eLife.96852)
Supplement: Supplementary file 13. [file elife-96852-supp13.xlsx]

## Sheet: SupTab_12_variant_to_gene_mappi
Table S13: Variant to gene mapping across all timepoints
ocr_id	chr	start	end	gene_name	gene_id	hic_contact_condition	rsid	pvalue	chr.1	pos	z2	BF	pp	sentinel	pp_cumsum	gwas	loc	cluster	hla_region
OCR_100278	chr21	34696525	34698015	IFNAR2	ENSG00000159110.15	HiC_0hr_4kb:HiC_8hr_4kb:HiC_24hr_4kb	rs16997869	0.03273	chr21	34696867	4.55985	9.77593	0.00246377	rs2284553	0.703643	UC	chr21:34696867-34696867	not_differential	FALSE
OCR_100278	chr21	34696525	34698015	IFNAR2	ENSG00000159110.15	HiC_0hr_4kb:HiC_8hr_4kb:HiC_24hr_4kb	rs2850015	0.04002	chr21	34697264	4.21704	8.23603	0.00207568	rs2284553	0.737185	UC	chr21:34697264-34697264	not_differential	FALSE
OCR_100278	chr21	34696525	34698015	IFNAR2	ENSG00000159110.15	HiC_0hr_4kb:HiC_8hr_4kb:HiC_24hr_4kb	rs112371220	0.6671	chr21	34697316	0.185013	1.09692	0.000276451	rs2284553	0.946195	UC	chr21:34697316-34697316	not_differential	FALSE
OCR_100278	chr21	34696525	34698015	IFNAR2	ENSG00000159110.15	HiC_0hr_4kb:HiC_8hr_4kb:HiC_24hr_4kb	rs144986404	0.643	chr21	34697325	0.21484	1.1134	0.000280605	rs2284553	0.941743	UC	chr21:34697325-34697325	not_differential	FALSE
OCR_100278	chr21	34696525	34698015	IFNAR2	ENSG00000159110.15	HiC_0hr_4kb:HiC_8hr_4kb:HiC_24hr_4kb	rs148956118	0.405	chr21	34697501	0.69343	1.41441	0.000356467	rs2284553	0.889346	UC	chr21:34697501-34697501	not_differential	FALSE
OCR_100278	chr21	34696525	34698015	IFNAR2	ENSG00000159110.15	HiC_0hr_4kb:HiC_8hr_4kb:HiC_24hr_4kb	rs191348317	0.1239	chr21	34697719	2.36731	3.2663	0.000823187	rs2284553	0.830229	UC	chr21:34697719-34697719	not_differential	FALSE
OCR_100281	chr21	34703603	34703961	IFNAR2	ENSG00000159110.15	HiC_0hr_4kb:HiC_24hr_4kb	rs17875779	0.6868	chr21	34703703	0.162571	1.08468	0.000273366	rs2284553	0.949771	UC	chr21:34703703-34703703	not_differential	FALSE
OCR_100284	chr21	34733189	34734861	AP000295.9	ENSG00000249624.4	HiC_8hr_4kb	rs117044985	0.2952	chr21	34733260	1.09575	1.72958	0.000435896	rs2284553	0.876431	UC	chr21:34733260-34733260	not_differential	FALSE
OCR_100284	chr21	34733189	34734861	AP000295.9	ENSG00000249624.4	HiC_8hr_4kb	rs117494686	0.4434	chr21	34733322	0.587468	1.34143	0.000338072	rs2284553	0.895582	UC	chr21:34733322-34733322	not_differential	FALSE
OCR_100284	chr21	34733189	34734861	AP000295.9	ENSG00000249624.4	HiC_8hr_4kb	rs71323368	0.2009	chr21	34733451	1.63582	2.26576	0.000571027	rs2284553	0.859567	UC	chr21:34733451-34733451	not_differential	FALSE
OCR_100284	chr21	34733189	34734861	AP000295.9	ENSG00000249624.4	HiC_8hr_4kb	rs9980664	0.2694	chr21	34734510	1.2198	1.84025	0.000463787	rs2284553	0.872889	UC	chr21:34734510-34734510	not_differential	FALSE
OCR_100284	chr21	34733189	34734861	C21orf49	ENSG00000205930.4	HiC_0hr_4kb	rs117044985	0.2952	chr21	34733260	1.09575	1.72958	0.000435896	rs2284553	0.876431	UC	chr21:34733260-34733260	4	FALSE
OCR_100284	chr21	34733189	34734861	C21orf49	ENSG00000205930.4	HiC_0hr_4kb	rs117494686	0.4434	chr21	34733322	0.587468	1.34143	0.000338072	rs2284553	0.895582	UC	chr21:34733322-34733322	4	FALSE
OCR_100284	chr21	34733189	34734861	C21orf49	ENSG00000205930.4	HiC_0hr_4kb	rs71323368	0.2009	chr21	34733451	1.63582	2.26576	0.000571027	rs2284553	0.859567	UC	chr21:34733451-34733451	4	FALSE
OCR_100284	chr21	34733189	34734861	C21orf49	ENSG00000205930.4	HiC_0hr_4kb	rs9980664	0.2694	chr21	34734510	1.2198	1.84025	0.000463787	rs2284553	0.872889	UC	chr21:34734510-34734510	4	FALSE
OCR_100284	chr21	34733189	34734861	IFNAR2	ENSG00000159110.15	HiC_0hr_4kb:HiC_8hr_4kb:HiC_24hr_4kb	rs117044985	0.2952	chr21	34733260	1.09575	1.72958	0.000435896	rs2284553	0.876431	UC	chr21:34733260-34733260	not_differential	FALSE
OCR_100284	chr21	34733189	34734861	IFNAR2	ENSG00000159110.15	HiC_0hr_4kb:HiC_8hr_4kb:HiC_24hr_4kb	rs117494686	0.4434	chr21	34733322	0.587468	1.34143	0.000338072	rs2284553	0.895582	UC	chr21:34733322-34733322	not_differential	FALSE
OCR_100284	chr21	34733189	34734861	IFNAR2	ENSG00000159110.15	HiC_0hr_4kb:HiC_8hr_4kb:HiC_24hr_4kb	rs71323368	0.2009	chr21	34733451	1.63582	2.26576	0.000571027	rs2284553	0.859567	UC	chr21:34733451-34733451	not_differential	FALSE
OCR_100284	chr21	34733189	34734861	IFNAR2	ENSG00000159110.15	HiC_0hr_4kb:HiC_8hr_4kb:HiC_24hr_4kb	rs9980664	0.2694	chr21	34734510	1.2198	1.84025	0.000463787	rs2284553	0.872889	UC	chr21:34734510-34734510	not_differential	FALSE
OCR_100284	chr21	34733189	34734861	IL10RB	ENSG00000243646.4	HiC_0hr_4kb	rs117044985	0.2952	chr21	34733260	1.09575	1.72958	0.000435896	rs2284553	0.876431	UC	chr21:34733260-34733260	not_differential	FALSE
OCR_100284	chr21	34733189	34734861	IL10RB	ENSG00000243646.4	HiC_0hr_4kb	rs117494686	0.4434	chr21	34733322	0.587468	1.34143	0.000338072	rs2284553	0.895582	UC	chr21:34733322-34733322	not_differential	FALSE
OCR_100284	chr21	34733189	34734861	IL10RB	ENSG00000243646.4	HiC_0hr_4kb	rs71323368	0.2009	chr21	34733451	1.63582	2.26576	0.000571027	rs2284553	0.859567	UC	chr21:34733451-34733451	not_differential	FALSE
OCR_100284	chr21	34733189	34734861	IL10RB	ENSG00000243646.4	HiC_0hr_4kb	rs9980664	0.2694	chr21	34734510	1.2198	1.84025	0.000463787	rs2284553	0.872889	UC	chr21:34734510-34734510	not_differential	FALSE
OCR_100284	chr21	34733189	34734861	IL10RB-AS1	ENSG00000223799.1	HiC_0hr_4kb	rs117044985	0.2952	chr21	34733260	1.09575	1.72958	0.000435896	rs2284553	0.876431	UC	chr21:34733260-34733260	not_differential	FALSE
OCR_100284	chr21	34733189	34734861	IL10RB-AS1	ENSG00000223799.1	HiC_0hr_4kb	rs117494686	0.4434	chr21	34733322	0.587468	1.34143	0.000338072	rs2284553	0.895582	UC	chr21:34733322-34733322	not_differential	FALSE
OCR_100284	chr21	34733189	34734861	IL10RB-AS1	ENSG00000223799.1	HiC_0hr_4kb	rs71323368	0.2009	chr21	34733451	1.63582	2.26576	0.000571027	rs2284553	0.859567	UC	chr21:34733451-34733451	not_differential	FALSE
OCR_100284	chr21	34733189	34734861	IL10RB-AS1	ENSG00000223799.1	HiC_0hr_4kb	rs9980664	0.2694	chr21	34734510	1.2198	1.84025	0.000463787	rs2284553	0.872889	UC	chr21:34734510-34734510	not_differential	FALSE
OCR_100284	chr21	34733189	34734861	PAXBP1	ENSG00000159086.10	HiC_0hr_4kb	rs117044985	0.2952	chr21	34733260	1.09575	1.72958	0.000435896	rs2284553	0.876431	UC	chr21:34733260-34733260	not_differential	FALSE
OCR_100284	chr21	34733189	34734861	PAXBP1	ENSG00000159086.10	HiC_0hr_4kb	rs117494686	0.4434	chr21	34733322	0.587468	1.34143	0.000338072	rs2284553	0.895582	UC	chr21:34733322-34733322	not_differential	FALSE
OCR_100284	chr21	34733189	34734861	PAXBP1	ENSG00000159086.10	HiC_0hr_4kb	rs71323368	0.2009	chr21	34733451	1.63582	2.26576	0.000571027	rs2284553	0.859567	UC	chr21:34733451-34733451	not_differential	FALSE
OCR_100284	chr21	34733189	34734861	PAXBP1	ENSG00000159086.10	HiC_0hr_4kb	rs9980664	0.2694	chr21	34734510	1.2198	1.84025	0.000463787	rs2284553	0.872889	UC	chr21:34734510-34734510	not_differential	FALSE
OCR_100286	chr21	34752590	34753590	AP000295.9	ENSG00000249624.4	HiC_0hr_4kb:HiC_8hr_4kb	rs28735854	0.5785	chr21	34752712	0.308666	1.16688	0.000294082	rs2284553	0.917948	UC	chr21:34752712-34752712	not_differential	FALSE
OCR_100286	chr21	34752590	34753590	AP000295.9	ENSG00000249624.4	HiC_0hr_4kb:HiC_8hr_4kb	rs2834208	0.08309	chr21	34752763	3.0034	4.48931	0.00113142	rs2284553	0.810946	UC	chr21:34752763-34752763	not_differential	FALSE
OCR_100286	chr21	34752590	34753590	AP000295.9	ENSG00000249624.4	HiC_0hr_4kb:HiC_8hr_4kb	rs2834209	0.1642	chr21	34752794	1.93511	2.63151	0.000663204	rs2284553	0.845503	UC	chr21:34752794-34752794	not_differential	FALSE
OCR_100286	chr21	34752590	34753590	AP000295.9	ENSG00000249624.4	HiC_0hr_4kb:HiC_8hr_4kb	rs62226376	0.5358	chr21	34752841	0.38338	1.21129	0.000305276	rs2284553	0.908985	UC	chr21:34752841-34752841	not_differential	FALSE
OCR_100286	chr21	34752590	34753590	AP000295.9	ENSG00000249624.4	HiC_0hr_4kb:HiC_8hr_4kb	rs12329794	0.5675	chr21	34753038	0.326883	1.17756	0.000296773	rs2284553	0.915293	UC	chr21:34753038-34753038	not_differential	FALSE
OCR_100286	chr21	34752590	34753590	AP000295.9	ENSG00000249624.4	HiC_0hr_4kb:HiC_8hr_4kb	rs149507761	0.5242	chr21	34753093	0.405622	1.22484	0.00030869	rs2284553	0.907454	UC	chr21:34753093-34753093	not_differential	FALSE
OCR_100286	chr21	34752590	34753590	AP000295.9	ENSG00000249624.4	HiC_0hr_4kb:HiC_8hr_4kb	rs201065969	0.5652	chr21	34753450	0.33078	1.17985	0.000297352	rs2284553	0.914699	UC	chr21:34753450-34753450	not_differential	FALSE
OCR_100286	chr21	34752590	34753590	C21orf49	ENSG00000205930.4	HiC_24hr_4kb	rs28735854	0.5785	chr21	34752712	0.308666	1.16688	0.000294082	rs2284553	0.917948	UC	chr21:34752712-34752712	4	FALSE
OCR_100286	chr21	34752590	34753590	C21orf49	ENSG00000205930.4	HiC_24hr_4kb	rs2834208	0.08309	chr21	34752763	3.0034	4.48931	0.00113142	rs2284553	0.810946	UC	chr21:34752763-34752763	4	FALSE
OCR_100286	chr21	34752590	34753590	C21orf49	ENSG00000205930.4	HiC_24hr_4kb	rs2834209	0.1642	chr21	34752794	1.93511	2.63151	0.000663204	rs2284553	0.845503	UC	chr21:34752794-34752794	4	FALSE
OCR_100286	chr21	34752590	34753590	C21orf49	ENSG00000205930.4	HiC_24hr_4kb	rs62226376	0.5358	chr21	34752841	0.38338	1.21129	0.000305276	rs2284553	0.908985	UC	chr21:34752841-34752841	4	FALSE
OCR_100286	chr21	34752590	34753590	C21orf49	ENSG00000205930.4	HiC_24hr_4kb	rs12329794	0.5675	chr21	34753038	0.326883	1.17756	0.000296773	rs2284553	0.915293	UC	chr21:34753038-34753038	4	FALSE
OCR_100286	chr21	34752590	34753590	C21orf49	ENSG00000205930.4	HiC_24hr_4kb	rs149507761	0.5242	chr21	34753093	0.405622	1.22484	0.00030869	rs2284553	0.907454	UC	chr21:34753093-34753093	4	FALSE
OCR_100286	chr21	34752590	34753590	C21orf49	ENSG00000205930.4	HiC_24hr_4kb	rs201065969	0.5652	chr21	34753450	0.33078	1.17985	0.000297352	rs2284553	0.914699	UC	chr21:34753450-34753450	4	FALSE
OCR_100286	chr21	34752590	34753590	IFNAR2	ENSG00000159110.15	HiC_0hr_4kb:HiC_8hr_4kb	rs28735854	0.5785	chr21	34752712	0.308666	1.16688	0.000294082	rs2284553	0.917948	UC	chr21:34752712-34752712	not_differential	FALSE
OCR_100286	chr21	34752590	34753590	IFNAR2	ENSG00000159110.15	HiC_0hr_4kb:HiC_8hr_4kb	rs2834208	0.08309	chr21	34752763	3.0034	4.48931	0.00113142	rs2284553	0.810946	UC	chr21:34752763-34752763	not_differential	FALSE
OCR_100286	chr21	34752590	34753590	IFNAR2	ENSG00000159110.15	HiC_0hr_4kb:HiC_8hr_4kb	rs2834209	0.1642	chr21	34752794	1.93511	2.63151	0.000663204	rs2284553	0.845503	UC	chr21:34752794-34752794	not_differential	FALSE
OCR_100286	chr21	34752590	34753590	IFNAR2	ENSG00000159110.15	HiC_0hr_4kb:HiC_8hr_4kb	rs62226376	0.5358	chr21	34752841	0.38338	1.21129	0.000305276	rs2284553	0.908985	UC	chr21:34752841-34752841	not_differential	FALSE
OCR_100286	chr21	34752590	34753590	IFNAR2	ENSG00000159110.15	HiC_0hr_4kb:HiC_8hr_4kb	rs12329794	0.5675	chr21	34753038	0.326883	1.17756	0.000296773	rs2284553	0.915293	UC	chr21:34753038-34753038	not_differential	FALSE
OCR_100286	chr21	34752590	34753590	IFNAR2	ENSG00000159110.15	HiC_0hr_4kb:HiC_8hr_4kb	rs149507761	0.5242	chr21	34753093	0.405622	1.22484	0.00030869	rs2284553	0.907454	UC	chr21:34753093-34753093	not_differential	FALSE
OCR_100286	chr21	34752590	34753590	IFNAR2	ENSG00000159110.15	HiC_0hr_4kb:HiC_8hr_4kb	rs201065969	0.5652	chr21	34753450	0.33078	1.17985	0.000297352	rs2284553	0.914699	UC	chr21:34753450-34753450	not_differential	FALSE
OCR_100286	chr21	34752590	34753590	IFNGR2	ENSG00000159128.10	HiC_8hr_4kb:HiC_24hr_4kb	rs28735854	0.5785	chr21	34752712	0.308666	1.16688	0.000294082	rs2284553	0.917948	UC	chr21:34752712-34752712	1	FALSE
OCR_100286	chr21	34752590	34753590	IFNGR2	ENSG00000159128.10	HiC_8hr_4kb:HiC_24hr_4kb	rs2834208	0.08309	chr21	34752763	3.0034	4.48931	0.00113142	rs2284553	0.810946	UC	chr21:34752763-34752763	1	FALSE
OCR_100286	chr21	34752590	34753590	IFNGR2	ENSG00000159128.10	HiC_8hr_4kb:HiC_24hr_4kb	rs2834209	0.1642	chr21	34752794	1.93511	2.63151	0.000663204	rs2284553	0.845503	UC	chr21:34752794-34752794	1	FALSE
OCR_100286	chr21	34752590	34753590	IFNGR2	ENSG00000159128.10	HiC_8hr_4kb:HiC_24hr_4kb	rs62226376	0.5358	chr21	34752841	0.38338	1.21129	0.000305276	rs2284553	0.908985	UC	chr21:34752841-34752841	1	FALSE
OCR_100286	chr21	34752590	34753590	IFNGR2	ENSG00000159128.10	HiC_8hr_4kb:HiC_24hr_4kb	rs12329794	0.5675	chr21	34753038	0.326883	1.17756	0.000296773	rs2284553	0.915293	UC	chr21:34753038-34753038	1	FALSE
OCR_100286	chr21	34752590	34753590	IFNGR2	ENSG00000159128.10	HiC_8hr_4kb:HiC_24hr_4kb	rs149507761	0.5242	chr21	34753093	0.405622	1.22484	0.00030869	rs2284553	0.907454	UC	chr21:34753093-34753093	1	FALSE
OCR_100286	chr21	34752590	34753590	IFNGR2	ENSG00000159128.10	HiC_8hr_4kb:HiC_24hr_4kb	rs201065969	0.5652	chr21	34753450	0.33078	1.17985	0.000297352	rs2284553	0.914699	UC	chr21:34753450-34753450	1	FALSE
OCR_100286	chr21	34752590	34753590	PAXBP1	ENSG00000159086.10	HiC_24hr_4kb	rs28735854	0.5785	chr21	34752712	0.308666	1.16688	0.000294082	rs2284553	0.917948	UC	chr21:34752712-34752712	not_differential	FALSE
OCR_100286	chr21	34752590	34753590	PAXBP1	ENSG00000159086.10	HiC_24hr_4kb	rs2834208	0.08309	chr21	34752763	3.0034	4.48931	0.00113142	rs2284553	0.810946	UC	chr21:34752763-34752763	not_differential	FALSE
OCR_100286	chr21	34752590	34753590	PAXBP1	ENSG00000159086.10	HiC_24hr_4kb	rs2834209	0.1642	chr21	34752794	1.93511	2.63151	0.000663204	rs2284553	0.845503	UC	chr21:34752794-34752794	not_differential	FALSE
OCR_100286	chr21	34752590	34753590	PAXBP1	ENSG00000159086.10	HiC_24hr_4kb	rs62226376	0.5358	chr21	34752841	0.38338	1.21129	0.000305276	rs2284553	0.908985	UC	chr21:34752841-34752841	not_differential	FALSE
OCR_100286	chr21	34752590	34753590	PAXBP1	ENSG00000159086.10	HiC_24hr_4kb	rs12329794	0.5675	chr21	34753038	0.326883	1.17756	0.000296773	rs2284553	0.915293	UC	chr21:34753038-34753038	not_differential	FALSE
OCR_100286	chr21	34752590	34753590	PAXBP1	ENSG00000159086.10	HiC_24hr_4kb	rs149507761	0.5242	chr21	34753093	0.405622	1.22484	0.00030869	rs2284553	0.907454	UC	chr21:34753093-34753093	not_differential	FALSE
OCR_100286	chr21	34752590	34753590	PAXBP1	ENSG00000159086.10	HiC_24hr_4kb	rs201065969	0.5652	chr21	34753450	0.33078	1.17985	0.000297352	rs2284553	0.914699	UC	chr21:34753450-34753450	not_differential	FALSE
OCR_100288	chr21	34756003	34756410	IFNGR2	ENSG00000159128.10	HiC_8hr_4kb:HiC_24hr_4kb	rs6517167	0.1884	chr21	34756057	1.73009	2.37511	0.000598585	rs2284553	0.854316	UC	chr21:34756057-34756057	1	FALSE
OCR_100288	chr21	34756003	34756410	IFNGR2	ENSG00000159128.10	HiC_8hr_4kb:HiC_24hr_4kb	rs8127569	0.1523	chr21	34756105	2.04906	2.78579	0.000702087	rs2284553	0.840731	UC	chr21:34756105-34756105	1	FALSE
OCR_100289	chr21	34757023	34757519	IFNGR2	ENSG00000159128.10	HiC_8hr_4kb:HiC_24hr_4kb	rs114981761	0.2887	chr21	34757474	1.12567	1.75565	0.000442466	rs2284553	0.874679	UC	chr21:34757474-34757474	1	FALSE
OCR_100293	chr21	34806818	34807737	IFNAR2	ENSG00000159110.15	HiC_8hr_4kb	rs147132128	0.3537	chr21	34807010	0.860138	1.53736	0.000387453	rs2284553	0.883767	UC	chr21:34807010-34807010	not_differential	FALSE
OCR_100293	chr21	34806818	34807737	IFNAR2	ENSG00000159110.15	HiC_8hr_4kb	rs188994033	0.6202	chr21	34807156	0.245587	1.13065	0.000284952	rs2284553	0.933817	UC	chr21:34807156-34807156	not_differential	FALSE
OCR_100293	chr21	34806818	34807737	SNORA70	ENSG00000207098.1	HiC_0hr_4kb	rs147132128	0.3537	chr21	34807010	0.860138	1.53736	0.000387453	rs2284553	0.883767	UC	chr21:34807010-34807010	not_differential	FALSE
OCR_100293	chr21	34806818	34807737	SNORA70	ENSG00000207098.1	HiC_0hr_4kb	rs188994033	0.6202	chr21	34807156	0.245587	1.13065	0.000284952	rs2284553	0.933817	UC	chr21:34807156-34807156	not_differential	FALSE
OCR_100294	chr21	34817475	34817869	AP000289.6	ENSG00000226527.1	HiC_8hr_4kb	rs4816457	0.4121	chr21	34817738	0.672734	1.39985	0.000352797	rs2284553	0.890055	UC	chr21:34817738-34817738	not_differential	FALSE
OCR_100294	chr21	34817475	34817869	AP000289.6	ENSG00000226527.1	HiC_8hr_4kb	rs4817570	0.4952	chr21	34817742	0.465208	1.26188	0.000318025	rs2284553	0.903071	UC	chr21:34817742-34817742	not_differential	FALSE
OCR_100294	chr21	34817475	34817869	AP000289.6	ENSG00000226527.1	HiC_8hr_4kb	rs181063330	0.08854	chr21	34817755	2.90072	4.26465	0.0010748	rs2284553	0.814212	UC	chr21:34817755-34817755	not_differential	FALSE
OCR_100294	chr21	34817475	34817869	AP000295.9	ENSG00000249624.4	HiC_0hr_4kb	rs4816457	0.4121	chr21	34817738	0.672734	1.39985	0.000352797	rs2284553	0.890055	UC	chr21:34817738-34817738	not_differential	FALSE
OCR_100294	chr21	34817475	34817869	AP000295.9	ENSG00000249624.4	HiC_0hr_4kb	rs4817570	0.4952	chr21	34817742	0.465208	1.26188	0.000318025	rs2284553	0.903071	UC	chr21:34817742-34817742	not_differential	FALSE
OCR_100294	chr21	34817475	34817869	AP000295.9	ENSG00000249624.4	HiC_0hr_4kb	rs181063330	0.08854	chr21	34817755	2.90072	4.26465	0.0010748	rs2284553	0.814212	UC	chr21:34817755-34817755	not_differential	FALSE
OCR_100294	chr21	34817475	34817869	C21orf49	ENSG00000205930.4	HiC_0hr_4kb	rs4816457	0.4121	chr21	34817738	0.672734	1.39985	0.000352797	rs2284553	0.890055	UC	chr21:34817738-34817738	4	FALSE
OCR_100294	chr21	34817475	34817869	C21orf49	ENSG00000205930.4	HiC_0hr_4kb	rs4817570	0.4952	chr21	34817742	0.465208	1.26188	0.000318025	rs2284553	0.903071	UC	chr21:34817742-34817742	4	FALSE
OCR_100294	chr21	34817475	34817869	C21orf49	ENSG00000205930.4	HiC_0hr_4kb	rs181063330	0.08854	chr21	34817755	2.90072	4.26465	0.0010748	rs2284553	0.814212	UC	chr21:34817755-34817755	4	FALSE
OCR_100294	chr21	34817475	34817869	C21orf54	ENSG00000229086.3	HiC_24hr_4kb	rs4816457	0.4121	chr21	34817738	0.672734	1.39985	0.000352797	rs2284553	0.890055	UC	chr21:34817738-34817738	not_differential	FALSE
OCR_100294	chr21	34817475	34817869	C21orf54	ENSG00000229086.3	HiC_24hr_4kb	rs4817570	0.4952	chr21	34817742	0.465208	1.26188	0.000318025	rs2284553	0.903071	UC	chr21:34817742-34817742	not_differential	FALSE
OCR_100294	chr21	34817475	34817869	C21orf54	ENSG00000229086.3	HiC_24hr_4kb	rs181063330	0.08854	chr21	34817755	2.90072	4.26465	0.0010748	rs2284553	0.814212	UC	chr21:34817755-34817755	not_differential	FALSE
OCR_100294	chr21	34817475	34817869	IFNAR2	ENSG00000159110.15	HiC_0hr_4kb:HiC_8hr_4kb:HiC_24hr_4kb	rs4816457	0.4121	chr21	34817738	0.672734	1.39985	0.000352797	rs2284553	0.890055	UC	chr21:34817738-34817738	not_differential	FALSE
OCR_100294	chr21	34817475	34817869	IFNAR2	ENSG00000159110.15	HiC_0hr_4kb:HiC_8hr_4kb:HiC_24hr_4kb	rs4817570	0.4952	chr21	34817742	0.465208	1.26188	0.000318025	rs2284553	0.903071	UC	chr21:34817742-34817742	not_differential	FALSE
OCR_100294	chr21	34817475	34817869	IFNAR2	ENSG00000159110.15	HiC_0hr_4kb:HiC_8hr_4kb:HiC_24hr_4kb	rs181063330	0.08854	chr21	34817755	2.90072	4.26465	0.0010748	rs2284553	0.814212	UC	chr21:34817755-34817755	not_differential	FALSE
OCR_100294	chr21	34817475	34817869	IL10RB	ENSG00000243646.4	HiC_0hr_4kb:HiC_8hr_4kb	rs4816457	0.4121	chr21	34817738	0.672734	1.39985	0.000352797	rs2284553	0.890055	UC	chr21:34817738-34817738	not_differential	FALSE
OCR_100294	chr21	34817475	34817869	IL10RB	ENSG00000243646.4	HiC_0hr_4kb:HiC_8hr_4kb	rs4817570	0.4952	chr21	34817742	0.465208	1.26188	0.000318025	rs2284553	0.903071	UC	chr21:34817742-34817742	not_differential	FALSE
OCR_100294	chr21	34817475	34817869	IL10RB	ENSG00000243646.4	HiC_0hr_4kb:HiC_8hr_4kb	rs181063330	0.08854	chr21	34817755	2.90072	4.26465	0.0010748	rs2284553	0.814212	UC	chr21:34817755-34817755	not_differential	FALSE
OCR_100294	chr21	34817475	34817869	IL10RB-AS1	ENSG00000223799.1	HiC_0hr_4kb:HiC_8hr_4kb	rs4816457	0.4121	chr21	34817738	0.672734	1.39985	0.000352797	rs2284553	0.890055	UC	chr21:34817738-34817738	not_differential	FALSE
OCR_100294	chr21	34817475	34817869	IL10RB-AS1	ENSG00000223799.1	HiC_0hr_4kb:HiC_8hr_4kb	rs4817570	0.4952	chr21	34817742	0.465208	1.26188	0.000318025	rs2284553	0.903071	UC	chr21:34817742-34817742	not_differential	FALSE
OCR_100294	chr21	34817475	34817869	IL10RB-AS1	ENSG00000223799.1	HiC_0hr_4kb:HiC_8hr_4kb	rs181063330	0.08854	chr21	34817755	2.90072	4.26465	0.0010748	rs2284553	0.814212	UC	chr21:34817755-34817755	not_differential	FALSE
OCR_100294	chr21	34817475	34817869	PAXBP1	ENSG00000159086.10	HiC_0hr_4kb	rs4816457	0.4121	chr21	34817738	0.672734	1.39985	0.000352797	rs2284553	0.890055	UC	chr21:34817738-34817738	not_differential	FALSE
OCR_100294	chr21	34817475	34817869	PAXBP1	ENSG00000159086.10	HiC_0hr_4kb	rs4817570	0.4952	chr21	34817742	0.465208	1.26188	0.000318025	rs2284553	0.903071	UC	chr21:34817742-34817742	not_differential	FALSE
OCR_100294	chr21	34817475	34817869	PAXBP1	ENSG00000159086.10	HiC_0hr_4kb	rs181063330	0.08854	chr21	34817755	2.90072	4.26465	0.0010748	rs2284553	0.814212	UC	chr21:34817755-34817755	not_differential	FALSE
OCR_100294	chr21	34817475	34817869	SNORA70	ENSG00000207098.1	HiC_0hr_4kb:HiC_8hr_4kb:HiC_24hr_4kb	rs4816457	0.4121	chr21	34817738	0.672734	1.39985	0.000352797	rs2284553	0.890055	UC	chr21:34817738-34817738	not_differential	FALSE
OCR_100294	chr21	34817475	34817869	SNORA70	ENSG00000207098.1	HiC_0hr_4kb:HiC_8hr_4kb:HiC_24hr_4kb	rs4817570	0.4952	chr21	34817742	0.465208	1.26188	0.000318025	rs2284553	0.903071	UC	chr21:34817742-34817742	not_differential	FALSE
OCR_100294	chr21	34817475	34817869	SNORA70	ENSG00000207098.1	HiC_0hr_4kb:HiC_8hr_4kb:HiC_24hr_4kb	rs181063330	0.08854	chr21	34817755	2.90072	4.26465	0.0010748	rs2284553	0.814212	UC	chr21:34817755-34817755	not_differential	FALSE
OCR_100294	chr21	34817475	34817869	SYNJ1	ENSG00000159082.13	HiC_0hr_4kb	rs4816457	0.4121	chr21	34817738	0.672734	1.39985	0.000352797	rs2284553	0.890055	UC	chr21:34817738-34817738	4	FALSE
OCR_100294	chr21	34817475	34817869	SYNJ1	ENSG00000159082.13	HiC_0hr_4kb	rs4817570	0.4952	chr21	34817742	0.465208	1.26188	0.000318025	rs2284553	0.903071	UC	chr21:34817742-34817742	4	FALSE
OCR_100294	chr21	34817475	34817869	SYNJ1	ENSG00000159082.13	HiC_0hr_4kb	rs181063330	0.08854	chr21	34817755	2.90072	4.26465	0.0010748	rs2284553	0.814212	UC	chr21:34817755-34817755	4	FALSE
OCR_100295	chr21	34851189	34852929	AP000302.58	ENSG00000231355.1	HiC_0hr_2kb	rs181952865	0.006945	chr21	34851703	7.28714	38.228	0.0096344	rs2284553	0.581156	UC	chr21:34851703-34851703	not_differential	FALSE
OCR_100295	chr21	34851189	34852929	AP000302.58	ENSG00000231355.1	HiC_0hr_2kb	rs2276224	0.5952	chr21	34852100	0.282296	1.1516	0.00029023	rs2284553	0.922617	UC	chr21:34852100-34852100	not_differential	FALSE
OCR_100295	chr21	34851189	34852929	C21orf49	ENSG00000205930.4	HiC_0hr_4kb	rs181952865	0.006945	chr21	34851703	7.28714	38.228	0.0096344	rs2284553	0.581156	UC	chr21:34851703-34851703	4	FALSE
OCR_100295	chr21	34851189	34852929	C21orf49	ENSG00000205930.4	HiC_0hr_4kb	rs2276224	0.5952	chr21	34852100	0.282296	1.1516	0.00029023	rs2284553	0.922617	UC	chr21:34852100-34852100	4	FALSE
OCR_100295	chr21	34851189	34852929	CRYZL1	ENSG00000205758.7	HiC_0hr_4kb	rs181952865	0.006945	chr21	34851703	7.28714	38.228	0.0096344	rs2284553	0.581156	UC	chr21:34851703-34851703	not_differential	FALSE
OCR_100295	chr21	34851189	34852929	CRYZL1	ENSG00000205758.7	HiC_0hr_4kb	rs2276224	0.5952	chr21	34852100	0.282296	1.1516	0.00029023	rs2284553	0.922617	UC	chr21:34852100-34852100	not_differential	FALSE
OCR_100295	chr21	34851189	34852929	DNAJC28	ENSG00000177692.7	HiC_0hr_4kb:HiC_8hr_4kb	rs181952865	0.006945	chr21	34851703	7.28714	38.228	0.0096344	rs2284553	0.581156	UC	chr21:34851703-34851703	not_differential	FALSE
OCR_100295	chr21	34851189	34852929	DNAJC28	ENSG00000177692.7	HiC_0hr_4kb:HiC_8hr_4kb	rs2276224	0.5952	chr21	34852100	0.282296	1.1516	0.00029023	rs2284553	0.922617	UC	chr21:34852100-34852100	not_differential	FALSE
OCR_100295	chr21	34851189	34852929	DONSON	ENSG00000159147.13	HiC_0hr_4kb	rs181952865	0.006945	chr21	34851703	7.28714	38.228	0.0096344	rs2284553	0.581156	UC	chr21:34851703-34851703	5	FALSE
OCR_100295	chr21	34851189	34852929	DONSON	ENSG00000159147.13	HiC_0hr_4kb	rs2276224	0.5952	chr21	34852100	0.282296	1.1516	0.00029023	rs2284553	0.922617	UC	chr21:34852100-34852100	5	FALSE
OCR_100295	chr21	34851189	34852929	GART	ENSG00000159131.12	HiC_0hr_4kb	rs181952865	0.006945	chr21	34851703	7.28714	38.228	0.0096344	rs2284553	0.581156	UC	chr21:34851703-34851703	3	FALSE
OCR_100295	chr21	34851189	34852929	GART	ENSG00000159131.12	HiC_0hr_4kb	rs2276224	0.5952	chr21	34852100	0.282296	1.1516	0.00029023	rs2284553	0.922617	UC	chr21:34852100-34852100	3	FALSE
OCR_100295	chr21	34851189	34852929	PAXBP1	ENSG00000159086.10	HiC_0hr_4kb	rs181952865	0.006945	chr21	34851703	7.28714	38.228	0.0096344	rs2284553	0.581156	UC	chr21:34851703-34851703	not_differential	FALSE
OCR_100295	chr21	34851189	34852929	PAXBP1	ENSG00000159086.10	HiC_0hr_4kb	rs2276224	0.5952	chr21	34852100	0.282296	1.1516	0.00029023	rs2284553	0.922617	UC	chr21:34852100-34852100	not_differential	FALSE
OCR_100295	chr21	34851189	34852929	PAXBP1-AS1	ENSG00000238197.1	HiC_0hr_4kb	rs181952865	0.006945	chr21	34851703	7.28714	38.228	0.0096344	rs2284553	0.581156	UC	chr21:34851703-34851703	4	FALSE
OCR_100295	chr21	34851189	34852929	PAXBP1-AS1	ENSG00000238197.1	HiC_0hr_4kb	rs2276224	0.5952	chr21	34852100	0.282296	1.1516	0.00029023	rs2284553	0.922617	UC	chr21:34852100-34852100	4	FALSE
OCR_100295	chr21	34851189	34852929	SON	ENSG00000159140.13	HiC_0hr_4kb	rs181952865	0.006945	chr21	34851703	7.28714	38.228	0.0096344	rs2284553	0.581156	UC	chr21:34851703-34851703	1	FALSE
OCR_100295	chr21	34851189	34852929	SON	ENSG00000159140.13	HiC_0hr_4kb	rs2276224	0.5952	chr21	34852100	0.282296	1.1516	0.00029023	rs2284553	0.922617	UC	chr21:34852100-34852100	1	FALSE
OCR_100295	chr21	34851189	34852929	SYNJ1	ENSG00000159082.13	HiC_0hr_4kb	rs181952865	0.006945	chr21	34851703	7.28714	38.228	0.0096344	rs2284553	0.581156	UC	chr21:34851703-34851703	4	FALSE
OCR_100295	chr21	34851189	34852929	SYNJ1	ENSG00000159082.13	HiC_0hr_4kb	rs2276224	0.5952	chr21	34852100	0.282296	1.1516	0.00029023	rs2284553	0.922617	UC	chr21:34852100-34852100	4	FALSE
OCR_100297	chr21	34863558	34864494	C21orf49	ENSG00000205930.4	HiC_0hr_4kb	rs28360608	0.07588	chr21	34864391	3.15101	4.83318	0.00121808	rs2284553	0.805158	UC	chr21:34864391-34864391	4	FALSE
OCR_100297	chr21	34863558	34864494	GART	ENSG00000159131.12	HiC_0hr_4kb	rs28360608	0.07588	chr21	34864391	3.15101	4.83318	0.00121808	rs2284553	0.805158	UC	chr21:34864391-34864391	3	FALSE
OCR_100297	chr21	34863558	34864494	PAXBP1	ENSG00000159086.10	HiC_0hr_4kb	rs28360608	0.07588	chr21	34864391	3.15101	4.83318	0.00121808	rs2284553	0.805158	UC	chr21:34864391-34864391	not_differential	FALSE
OCR_100297	chr21	34863558	34864494	PAXBP1-AS1	ENSG00000238197.1	HiC_0hr_4kb:HiC_8hr_4kb	rs28360608	0.07588	chr21	34864391	3.15101	4.83318	0.00121808	rs2284553	0.805158	UC	chr21:34864391-34864391	4	FALSE
OCR_100297	chr21	34863558	34864494	SON	ENSG00000159140.13	HiC_0hr_4kb	rs28360608	0.07588	chr21	34864391	3.15101	4.83318	0.00121808	rs2284553	0.805158	UC	chr21:34864391-34864391	1	FALSE
OCR_100297	chr21	34863558	34864494	SYNJ1	ENSG00000159082.13	HiC_0hr_4kb:HiC_8hr_4kb	rs28360608	0.07588	chr21	34864391	3.15101	4.83318	0.00121808	rs2284553	0.805158	UC	chr21:34864391-34864391	4	FALSE
OCR_100297	chr21	34863558	34864494	TMEM50B	ENSG00000142188.12	HiC_0hr_4kb:HiC_8hr_4kb	rs28360608	0.07588	chr21	34864391	3.15101	4.83318	0.00121808	rs2284553	0.805158	UC	chr21:34864391-34864391	4	FALSE
OCR_100438	chr21	36420997	36421854	RUNX1	ENSG00000159216.14	HiC_0hr_2kb:HiC_0hr_4kb:HiC_8hr_2kb:HiC_8hr_4kb:HiC_24hr_4kb	rs56045941	7.564e-07	chr21	36421331	24.4658	205440	0.0132145	rs73205303	0.922442	ALG	chr21:36421331-36421331	not_differential	FALSE
OCR_100824	chr21	44834467	44835518	AP001046.5	ENSG00000237989.1	HiC_0hr_4kb	rs73380290	9.606e-06	chr21	44835347	19.5882	17927.8	0.0171666	rs76081789	0.932878	ALG	chr21:44835347-44835347	not_differential	FALSE
OCR_100824	chr21	44834467	44835518	AP001046.6	ENSG00000225637.1	HiC_0hr_4kb	rs73380290	9.606e-06	chr21	44835347	19.5882	17927.8	0.0171666	rs76081789	0.932878	ALG	chr21:44835347-44835347	not_differential	FALSE
OCR_100824	chr21	44834467	44835518	SIK1	ENSG00000142178.7	HiC_0hr_2kb:HiC_0hr_4kb	rs73380290	9.606e-06	chr21	44835347	19.5882	17927.8	0.0171666	rs76081789	0.932878	ALG	chr21:44835347-44835347	1	FALSE
OCR_100825	chr21	44845994	44847878	AP001046.5	ENSG00000237989.1	HiC_0hr_2kb:HiC_0hr_4kb	rs76081789	4.492e-06	chr21	44846426	21.0425	37096.1	0.0355212	rs76081789	0.862769	ALG	chr21:44846426-44846426	not_differential	FALSE
OCR_100825	chr21	44845994	44847878	AP001046.5	ENSG00000237989.1	HiC_0hr_2kb:HiC_0hr_4kb	rs58548854	1.79e-05	chr21	44847820	18.4006	9900.18	0.00947987	rs76081789	0.957547	ALG	chr21:44847820-44847820	not_differential	FALSE
OCR_100825	chr21	44845994	44847878	AP001046.5	ENSG00000237989.1	HiC_0hr_2kb:HiC_0hr_4kb	rs61696572	1.092e-05	chr21	44847870	19.3433	15861.7	0.0151883	rs76081789	0.948067	ALG	chr21:44847870-44847870	not_differential	FALSE
OCR_100825	chr21	44845994	44847878	AP001046.6	ENSG00000225637.1	HiC_0hr_2kb:HiC_0hr_4kb	rs76081789	4.492e-06	chr21	44846426	21.0425	37096.1	0.0355212	rs76081789	0.862769	ALG	chr21:44846426-44846426	not_differential	FALSE
OCR_100825	chr21	44845994	44847878	AP001046.6	ENSG00000225637.1	HiC_0hr_2kb:HiC_0hr_4kb	rs58548854	1.79e-05	chr21	44847820	18.4006	9900.18	0.00947987	rs76081789	0.957547	ALG	chr21:44847820-44847820	not_differential	FALSE
OCR_100825	chr21	44845994	44847878	AP001046.6	ENSG00000225637.1	HiC_0hr_2kb:HiC_0hr_4kb	rs61696572	1.092e-05	chr21	44847870	19.3433	15861.7	0.0151883	rs76081789	0.948067	ALG	chr21:44847870-44847870	not_differential	FALSE
OCR_100825	chr21	44845994	44847878	CRYAA	ENSG00000160202.3	HiC_8hr_4kb	rs76081789	4.492e-06	chr21	44846426	21.0425	37096.1	0.0355212	rs76081789	0.862769	ALG	chr21:44846426-44846426	not_differential	FALSE
OCR_100825	chr21	44845994	44847878	CRYAA	ENSG00000160202.3	HiC_8hr_4kb	rs58548854	1.79e-05	chr21	44847820	18.4006	9900.18	0.00947987	rs76081789	0.957547	ALG	chr21:44847820-44847820	not_differential	FALSE
OCR_100825	chr21	44845994	44847878	CRYAA	ENSG00000160202.3	HiC_8hr_4kb	rs61696572	1.092e-05	chr21	44847870	19.3433	15861.7	0.0151883	rs76081789	0.948067	ALG	chr21:44847870-44847870	not_differential	FALSE
OCR_100825	chr21	44845994	44847878	ERVH48-1	ENSG00000233056.1	HiC_0hr_4kb	rs76081789	4.492e-06	chr21	44846426	21.0425	37096.1	0.0355212	rs76081789	0.862769	ALG	chr21:44846426-44846426	4	FALSE
OCR_100825	chr21	44845994	44847878	ERVH48-1	ENSG00000233056.1	HiC_0hr_4kb	rs58548854	1.79e-05	chr21	44847820	18.4006	9900.18	0.00947987	rs76081789	0.957547	ALG	chr21:44847820-44847820	4	FALSE
OCR_100825	chr21	44845994	44847878	ERVH48-1	ENSG00000233056.1	HiC_0hr_4kb	rs61696572	1.092e-05	chr21	44847870	19.3433	15861.7	0.0151883	rs76081789	0.948067	ALG	chr21:44847870-44847870	4	FALSE
OCR_100825	chr21	44845994	44847878	HSF2BP	ENSG00000160207.4	HiC_0hr_4kb	rs76081789	4.492e-06	chr21	44846426	21.0425	37096.1	0.0355212	rs76081789	0.862769	ALG	chr21:44846426-44846426	not_differential	FALSE
OCR_100825	chr21	44845994	44847878	HSF2BP	ENSG00000160207.4	HiC_0hr_4kb	rs58548854	1.79e-05	chr21	44847820	18.4006	9900.18	0.00947987	rs76081789	0.957547	ALG	chr21:44847820-44847820	not_differential	FALSE
OCR_100825	chr21	44845994	44847878	HSF2BP	ENSG00000160207.4	HiC_0hr_4kb	rs61696572	1.092e-05	chr21	44847870	19.3433	15861.7	0.0151883	rs76081789	0.948067	ALG	chr21:44847870-44847870	not_differential	FALSE
OCR_100899	chr21	45615900	45617158	AIRE	ENSG00000160224.12	HiC_0hr_4kb:HiC_8hr_4kb	rs2838521	7.747e-19	chr21	45615917	78.5634	1.14772e+17	0.0411839	rs7282490	0.712278	CRO	chr21:45615917-45615917	not_differential	FALSE
OCR_100899	chr21	45615900	45617158	AIRE	ENSG00000160224.12	HiC_0hr_4kb:HiC_8hr_4kb	rs2838521	5.528e-24	chr21	45615917	102.009	1.41545e+22	0.054116	rs7282490	0.49461	IBD	chr21:45615917-45615917	not_differential	FALSE
OCR_100899	chr21	45615900	45617158	AIRE	ENSG00000160224.12	HiC_0hr_4kb:HiC_8hr_4kb	rs2838521	3.469e-13	chr21	45615917	52.9229	3.10501e+11	0.0502978	rs7282490	0.467407	UC	chr21:45615917-45615917	not_differential	FALSE
OCR_100899	chr21	45615900	45617158	AIRE	ENSG00000160224.12	HiC_0hr_4kb:HiC_8hr_4kb	rs4635612	7.868e-19	chr21	45615963	78.5328	1.13028e+17	0.0405583	rs7282490	0.752836	CRO	chr21:45615963-45615963	not_differential	FALSE
OCR_100899	chr21	45615900	45617158	AIRE	ENSG00000160224.12	HiC_0hr_4kb:HiC_8hr_4kb	rs4635612	6.252e-24	chr21	45615963	101.765	1.25301e+22	0.0479054	rs7282490	0.64455	IBD	chr21:45615963-45615963	not_differential	FALSE
OCR_100899	chr21	45615900	45617158	AIRE	ENSG00000160224.12	HiC_0hr_4kb:HiC_8hr_4kb	rs4635612	4.55e-13	chr21	45615963	52.3902	2.3789e+11	0.0385356	rs7282490	0.736851	UC	chr21:45615963-45615963	not_differential	FALSE
OCR_100899	chr21	45615900	45617158	AIRE	ENSG00000160224.12	HiC_0hr_4kb:HiC_8hr_4kb	rs4380337	2.35107e-08	chr21	45616049	31.1806	5.89896e+06	0.0924739	rs7282490	0.711759	AS	chr21:45616049-45616049	not_differential	FALSE
OCR_100899	chr21	45615900	45617158	AIRE	ENSG00000160224.12	HiC_0hr_4kb:HiC_8hr_4kb	rs4380337	1.001e-23	chr21	45616049	100.833	7.86141e+21	0.030056	rs7282490	0.873647	IBD	chr21:45616049-45616049	not_differential	FALSE
OCR_100899	chr21	45615900	45617158	AIRE	ENSG00000160224.12	HiC_0hr_4kb:HiC_8hr_4kb	rs4380337	3.939e-13	chr21	45616049	52.6733	2.74077e+11	0.0443974	rs7282490	0.656245	UC	chr21:45616049-45616049	not_differential	FALSE
OCR_100899	chr21	45615900	45617158	AIRE	ENSG00000160224.12	HiC_0hr_4kb:HiC_8hr_4kb	rs4317019	7.656e-19	chr21	45616275	78.5868	1.16119e+17	0.0416674	rs7282490	0.671094	CRO	chr21:45616275-45616275	not_differential	FALSE
OCR_100899	chr21	45615900	45617158	AIRE	ENSG00000160224.12	HiC_0hr_4kb:HiC_8hr_4kb	rs4317019	4.284e-24	chr21	45616275	102.514	1.82206e+22	0.0696614	rs7282490	0.312506	IBD	chr21:45616275-45616275	not_differential	FALSE
OCR_100899	chr21	45615900	45617158	AIRE	ENSG00000160224.12	HiC_0hr_4kb:HiC_8hr_4kb	rs4317019	2.509e-13	chr21	45616275	53.5593	4.26836e+11	0.0691427	rs7282490	0.246755	UC	chr21:45616275-45616275	not_differential	FALSE
OCR_100899	chr21	45615900	45617158	AIRE	ENSG00000160224.12	HiC_0hr_4kb:HiC_8hr_4kb	rs4456788	1.13514e-07	chr21	45616324	28.1286	1.2825e+06	0.0201048	rs7282490	0.962807	AS	chr21:45616324-45616324	not_differential	FALSE
OCR_100899	chr21	45615900	45617158	AIRE	ENSG00000160224.12	HiC_0hr_4kb:HiC_8hr_4kb	rs4456788	8.735e-19	chr21	45616324	78.3263	1.0194e+17	0.0365796	rs7282490	0.866722	CRO	chr21:45616324-45616324	not_differential	FALSE
OCR_100899	chr21	45615900	45617158	AIRE	ENSG00000160224.12	HiC_0hr_4kb:HiC_8hr_4kb	rs4456788	8.348e-24	chr21	45616324	101.192	9.41009e+21	0.0359769	rs7282490	0.843591	IBD	chr21:45616324-45616324	not_differential	FALSE
OCR_100899	chr21	45615900	45617158	AIRE	ENSG00000160224.12	HiC_0hr_4kb:HiC_8hr_4kb	rs4456788	2.86e-13	chr21	45616324	53.3021	3.75323e+11	0.0607981	rs7282490	0.307553	UC	chr21:45616324-45616324	not_differential	FALSE
OCR_100899	chr21	45615900	45617158	AIRE	ENSG00000160224.12	HiC_0hr_4kb:HiC_8hr_4kb	rs8134436	8.56864e-08	chr21	45616497	28.6731	1.68376e+06	0.0263952	rs7282490	0.850845	AS	chr21:45616497-45616497	not_differential	FALSE
OCR_100899	chr21	45615900	45617158	AIRE	ENSG00000160224.12	HiC_0hr_4kb:HiC_8hr_4kb	rs8134436	6.775e-19	chr21	45616497	78.8283	1.31022e+17	0.0470152	rs7282490	0.542179	CRO	chr21:45616497-45616497	not_differential	FALSE
OCR_100899	chr21	45615900	45617158	AIRE	ENSG00000160224.12	HiC_0hr_4kb:HiC_8hr_4kb	rs8134436	5.764e-24	chr21	45616497	101.926	1.35804e+22	0.051921	rs7282490	0.546531	IBD	chr21:45616497-45616497	not_differential	FALSE
OCR_100899	chr21	45615900	45617158	AIRE	ENSG00000160224.12	HiC_0hr_4kb:HiC_8hr_4kb	rs8134436	4.555e-13	chr21	45616497	52.388	2.37634e+11	0.0384941	rs7282490	0.775345	UC	chr21:45616497-45616497	not_differential	FALSE
OCR_100899	chr21	45615900	45617158	AIRE	ENSG00000160224.12	HiC_0hr_4kb:HiC_8hr_4kb	rs2070551	8.85336e-08	chr21	45616672	28.6098	1.63131e+06	0.0255729	rs7282490	0.876418	AS	chr21:45616672-45616672	not_differential	FALSE
OCR_100899	chr21	45615900	45617158	AIRE	ENSG00000160224.12	HiC_0hr_4kb:HiC_8hr_4kb	rs2070551	5.952e-19	chr21	45616672	79.0841	1.48903e+17	0.0534316	rs7282490	0.447901	CRO	chr21:45616672-45616672	not_differential	FALSE
OCR_100899	chr21	45615900	45617158	AIRE	ENSG00000160224.12	HiC_0hr_4kb:HiC_8hr_4kb	rs2070551	4.426e-24	chr21	45616672	102.449	1.76415e+22	0.0674473	rs7282490	0.379953	IBD	chr21:45616672-45616672	not_differential	FALSE
OCR_100899	chr21	45615900	45617158	AIRE	ENSG00000160224.12	HiC_0hr_4kb:HiC_8hr_4kb	rs2070551	2.147e-13	chr21	45616672	53.8655	4.97432e+11	0.0805786	rs7282490	0.177612	UC	chr21:45616672-45616672	not_differential	FALSE
OCR_100899	chr21	45615900	45617158	AIRE	ENSG00000160224.12	HiC_0hr_4kb:HiC_8hr_4kb	rs2070552	1.372e-18	chr21	45617069	77.4345	6.52651e+16	0.0234193	rs7282490	0.920613	CRO	chr21:45617069-45617069	not_differential	FALSE
OCR_100899	chr21	45615900	45617158	AIRE	ENSG00000160224.12	HiC_0hr_4kb:HiC_8hr_4kb	rs2070552	5.974e-24	chr21	45617069	101.855	1.31075e+22	0.0501129	rs7282490	0.596644	IBD	chr21:45617069-45617069	not_differential	FALSE
OCR_100899	chr21	45615900	45617158	AIRE	ENSG00000160224.12	HiC_0hr_4kb:HiC_8hr_4kb	rs2070552	2.94e-13	chr21	45617069	53.2479	3.65289e+11	0.0591728	rs7282490	0.366726	UC	chr21:45617069-45617069	not_differential	FALSE
OCR_100899	chr21	45615900	45617158	AP001055.6	ENSG00000225331.1	HiC_0hr_4kb:HiC_8hr_4kb:HiC_24hr_4kb	rs2838521	7.747e-19	chr21	45615917	78.5634	1.14772e+17	0.0411839	rs7282490	0.712278	CRO	chr21:45615917-45615917	not_differential	FALSE
OCR_100899	chr21	45615900	45617158	AP001055.6	ENSG00000225331.1	HiC_0hr_4kb:HiC_8hr_4kb:HiC_24hr_4kb	rs2838521	5.528e-24	chr21	45615917	102.009	1.41545e+22	0.054116	rs7282490	0.49461	IBD	chr21:45615917-45615917	not_differential	FALSE
OCR_100899	chr21	45615900	45617158	AP001055.6	ENSG00000225331.1	HiC_0hr_4kb:HiC_8hr_4kb:HiC_24hr_4kb	rs2838521	3.469e-13	chr21	45615917	52.9229	3.10501e+11	0.0502978	rs7282490	0.467407	UC	chr21:45615917-45615917	not_differential	FALSE
OCR_100899	chr21	45615900	45617158	AP001055.6	ENSG00000225331.1	HiC_0hr_4kb:HiC_8hr_4kb:HiC_24hr_4kb	rs4635612	7.868e-19	chr21	45615963	78.5328	1.13028e+17	0.0405583	rs7282490	0.752836	CRO	chr21:45615963-45615963	not_differential	FALSE
OCR_100899	chr21	45615900	45617158	AP001055.6	ENSG00000225331.1	HiC_0hr_4kb:HiC_8hr_4kb:HiC_24hr_4kb	rs4635612	6.252e-24	chr21	45615963	101.765	1.25301e+22	0.0479054	rs7282490	0.64455	IBD	chr21:45615963-45615963	not_differential	FALSE
OCR_100899	chr21	45615900	45617158	AP001055.6	ENSG00000225331.1	HiC_0hr_4kb:HiC_8hr_4kb:HiC_24hr_4kb	rs4635612	4.55e-13	chr21	45615963	52.3902	2.3789e+11	0.0385356	rs7282490	0.736851	UC	chr21:45615963-45615963	not_differential	FALSE
OCR_100899	chr21	45615900	45617158	AP001055.6	ENSG00000225331.1	HiC_0hr_4kb:HiC_8hr_4kb:HiC_24hr_4kb	rs4380337	2.35107e-08	chr21	45616049	31.1806	5.89896e+06	0.0924739	rs7282490	0.711759	AS	chr21:45616049-45616049	not_differential	FALSE
OCR_100899	chr21	45615900	45617158	AP001055.6	ENSG00000225331.1	HiC_0hr_4kb:HiC_8hr_4kb:HiC_24hr_4kb	rs4380337	1.001e-23	chr21	45616049	100.833	7.86141e+21	0.030056	rs7282490	0.873647	IBD	chr21:45616049-45616049	not_differential	FALSE
OCR_100899	chr21	45615900	45617158	AP001055.6	ENSG00000225331.1	HiC_0hr_4kb:HiC_8hr_4kb:HiC_24hr_4kb	rs4380337	3.939e-13	chr21	45616049	52.6733	2.74077e+11	0.0443974	rs7282490	0.656245	UC	chr21:45616049-45616049	not_differential	FALSE
OCR_100899	chr21	45615900	45617158	AP001055.6	ENSG00000225331.1	HiC_0hr_4kb:HiC_8hr_4kb:HiC_24hr_4kb	rs4317019	7.656e-19	chr21	45616275	78.5868	1.16119e+17	0.0416674	rs7282490	0.671094	CRO	chr21:45616275-45616275	not_differential	FALSE
OCR_100899	chr21	45615900	45617158	AP001055.6	ENSG00000225331.1	HiC_0hr_4kb:HiC_8hr_4kb:HiC_24hr_4kb	rs4317019	4.284e-24	chr21	45616275	102.514	1.82206e+22	0.0696614	rs7282490	0.312506	IBD	chr21:45616275-45616275	not_differential	FALSE
OCR_100899	chr21	45615900	45617158	AP001055.6	ENSG00000225331.1	HiC_0hr_4kb:HiC_8hr_4kb:HiC_24hr_4kb	rs4317019	2.509e-13	chr21	45616275	53.5593	4.26836e+11	0.0691427	rs7282490	0.246755	UC	chr21:45616275-45616275	not_differential	FALSE
OCR_100899	chr21	45615900	45617158	AP001055.6	ENSG00000225331.1	HiC_0hr_4kb:HiC_8hr_4kb:HiC_24hr_4kb	rs4456788	1.13514e-07	chr21	45616324	28.1286	1.2825e+06	0.0201048	rs7282490	0.962807	AS	chr21:45616324-45616324	not_differential	FALSE
OCR_100899	chr21	45615900	45617158	AP001055.6	ENSG00000225331.1	HiC_0hr_4kb:HiC_8hr_4kb:HiC_24hr_4kb	rs4456788	8.735e-19	chr21	45616324	78.3263	1.0194e+17	0.0365796	rs7282490	0.866722	CRO	chr21:45616324-45616324	not_differential	FALSE
OCR_100899	chr21	45615900	45617158	AP001055.6	ENSG00000225331.1	HiC_0hr_4kb:HiC_8hr_4kb:HiC_24hr_4kb	rs4456788	8.348e-24	chr21	45616324	101.192	9.41009e+21	0.0359769	rs7282490	0.843591	IBD	chr21:45616324-45616324	not_differential	FALSE
OCR_100899	chr21	45615900	45617158	AP001055.6	ENSG00000225331.1	HiC_0hr_4kb:HiC_8hr_4kb:HiC_24hr_4kb	rs4456788	2.86e-13	chr21	45616324	53.3021	3.75323e+11	0.0607981	rs7282490	0.307553	UC	chr21:45616324-45616324	not_differential	FALSE
OCR_100899	chr21	45615900	45617158	AP001055.6	ENSG00000225331.1	HiC_0hr_4kb:HiC_8hr_4kb:HiC_24hr_4kb	rs8134436	8.56864e-08	chr21	45616497	28.6731	1.68376e+06	0.0263952	rs7282490	0.850845	AS	chr21:45616497-45616497	not_differential	FALSE
OCR_100899	chr21	45615900	45617158	AP001055.6	ENSG00000225331.1	HiC_0hr_4kb:HiC_8hr_4kb:HiC_24hr_4kb	rs8134436	6.775e-19	chr21	45616497	78.8283	1.31022e+17	0.0470152	rs7282490	0.542179	CRO	chr21:45616497-45616497	not_differential	FALSE
OCR_100899	chr21	45615900	45617158	AP001055.6	ENSG00000225331.1	HiC_0hr_4kb:HiC_8hr_4kb:HiC_24hr_4kb	rs8134436	5.764e-24	chr21	45616497	101.926	1.35804e+22	0.051921	rs7282490	0.546531	IBD	chr21:45616497-45616497	not_differential	FALSE
OCR_100899	chr21	45615900	45617158	AP001055.6	ENSG00000225331.1	HiC_0hr_4kb:HiC_8hr_4kb:HiC_24hr_4kb	rs8134436	4.555e-13	chr21	45616497	52.388	2.37634e+11	0.0384941	rs7282490	0.775345	UC	chr21:45616497-45616497	not_differential	FALSE
OCR_100899	chr21	45615900	45617158	AP001055.6	ENSG00000225331.1	HiC_0hr_4kb:HiC_8hr_4kb:HiC_24hr_4kb	rs2070551	8.85336e-08	chr21	45616672	28.6098	1.63131e+06	0.0255729	rs7282490	0.876418	AS	chr21:45616672-45616672	not_differential	FALSE
OCR_100899	chr21	45615900	45617158	AP001055.6	ENSG00000225331.1	HiC_0hr_4kb:HiC_8hr_4kb:HiC_24hr_4kb	rs2070551	5.952e-19	chr21	45616672	79.0841	1.48903e+17	0.0534316	rs7282490	0.447901	CRO	chr21:45616672-45616672	not_differential	FALSE
OCR_100899	chr21	45615900	45617158	AP001055.6	ENSG00000225331.1	HiC_0hr_4kb:HiC_8hr_4kb:HiC_24hr_4kb	rs2070551	4.426e-24	chr21	45616672	102.449	1.76415e+22	0.0674473	rs7282490	0.379953	IBD	chr21:45616672-45616672	not_differential	FALSE
OCR_100899	chr21	45615900	45617158	AP001055.6	ENSG00000225331.1	HiC_0hr_4kb:HiC_8hr_4kb:HiC_24hr_4kb	rs2070551	2.147e-13	chr21	45616672	53.8655	4.97432e+11	0.0805786	rs7282490	0.177612	UC	chr21:45616672-45616672	not_differential	FALSE
OCR_100899	chr21	45615900	45617158	AP001055.6	ENSG00000225331.1	HiC_0hr_4kb:HiC_8hr_4kb:HiC_24hr_4kb	rs2070552	1.372e-18	chr21	45617069	77.4345	6.52651e+16	0.0234193	rs7282490	0.920613	CRO	chr21:45617069-45617069	not_differential	FALSE
OCR_100899	chr21	45615900	45617158	AP001055.6	ENSG00000225331.1	HiC_0hr_4kb:HiC_8hr_4kb:HiC_24hr_4kb	rs2070552	5.974e-24	chr21	45617069	101.855	1.31075e+22	0.0501129	rs7282490	0.596644	IBD	chr21:45617069-45617069	not_differential	FALSE
OCR_100899	chr21	45615900	45617158	AP001055.6	ENSG00000225331.1	HiC_0hr_4kb:HiC_8hr_4kb:HiC_24hr_4kb	rs2070552	2.94e-13	chr21	45617069	53.2479	3.65289e+11	0.0591728	rs7282490	0.366726	UC	chr21:45617069-45617069	not_differential	FALSE
OCR_100899	chr21	45615900	45617158	AP001058.3	ENSG00000232698.1	HiC_8hr_4kb:HiC_24hr_4kb	rs2838521	7.747e-19	chr21	45615917	78.5634	1.14772e+17	0.0411839	rs7282490	0.712278	CRO	chr21:45615917-45615917	not_differential	FALSE
OCR_100899	chr21	45615900	45617158	AP001058.3	ENSG00000232698.1	HiC_8hr_4kb:HiC_24hr_4kb	rs2838521	5.528e-24	chr21	45615917	102.009	1.41545e+22	0.054116	rs7282490	0.49461	IBD	chr21:45615917-45615917	not_differential	FALSE
OCR_100899	chr21	45615900	45617158	AP001058.3	ENSG00000232698.1	HiC_8hr_4kb:HiC_24hr_4kb	rs2838521	3.469e-13	chr21	45615917	52.9229	3.10501e+11	0.0502978	rs7282490	0.467407	UC	chr21:45615917-45615917	not_differential	FALSE
OCR_100899	chr21	45615900	45617158	AP001058.3	ENSG00000232698.1	HiC_8hr_4kb:HiC_24hr_4kb	rs4635612	7.868e-19	chr21	45615963	78.5328	1.13028e+17	0.0405583	rs7282490	0.752836	CRO	chr21:45615963-45615963	not_differential	FALSE
OCR_100899	chr21	45615900	45617158	AP001058.3	ENSG00000232698.1	HiC_8hr_4kb:HiC_24hr_4kb	rs4635612	6.252e-24	chr21	45615963	101.765	1.25301e+22	0.0479054	rs7282490	0.64455	IBD	chr21:45615963-45615963	not_differential	FALSE
OCR_100899	chr21	45615900	45617158	AP001058.3	ENSG00000232698.1	HiC_8hr_4kb:HiC_24hr_4kb	rs4635612	4.55e-13	chr21	45615963	52.3902	2.3789e+11	0.0385356	rs7282490	0.736851	UC	chr21:45615963-45615963	not_differential	FALSE
OCR_100899	chr21	45615900	45617158	AP001058.3	ENSG00000232698.1	HiC_8hr_4kb:HiC_24hr_4kb	rs4380337	2.35107e-08	chr21	45616049	31.1806	5.89896e+06	0.0924739	rs7282490	0.711759	AS	chr21:45616049-45616049	not_differential	FALSE
OCR_100899	chr21	45615900	45617158	AP001058.3	ENSG00000232698.1	HiC_8hr_4kb:HiC_24hr_4kb	rs4380337	1.001e-23	chr21	45616049	100.833	7.86141e+21	0.030056	rs7282490	0.873647	IBD	chr21:45616049-45616049	not_differential	FALSE
OCR_100899	chr21	45615900	45617158	AP001058.3	ENSG00000232698.1	HiC_8hr_4kb:HiC_24hr_4kb	rs4380337	3.939e-13	chr21	45616049	52.6733	2.74077e+11	0.0443974	rs7282490	0.656245	UC	chr21:45616049-45616049	not_differential	FALSE
OCR_100899	chr21	45615900	45617158	AP001058.3	ENSG00000232698.1	HiC_8hr_4kb:HiC_24hr_4kb	rs4317019	7.656e-19	chr21	45616275	78.5868	1.16119e+17	0.0416674	rs7282490	0.671094	CRO	chr21:45616275-45616275	not_differential	FALSE
OCR_100899	chr21	45615900	45617158	AP001058.3	ENSG00000232698.1	HiC_8hr_4kb:HiC_24hr_4kb	rs4317019	4.284e-24	chr21	45616275	102.514	1.82206e+22	0.0696614	rs7282490	0.312506	IBD	chr21:45616275-45616275	not_differential	FALSE
OCR_100899	chr21	45615900	45617158	AP001058.3	ENSG00000232698.1	HiC_8hr_4kb:HiC_24hr_4kb	rs4317019	2.509e-13	chr21	45616275	53.5593	4.26836e+11	0.0691427	rs7282490	0.246755	UC	chr21:45616275-45616275	not_differential	FALSE
OCR_100899	chr21	45615900	45617158	AP001058.3	ENSG00000232698.1	HiC_8hr_4kb:HiC_24hr_4kb	rs4456788	1.13514e-07	chr21	45616324	28.1286	1.2825e+06	0.0201048	rs7282490	0.962807	AS	chr21:45616324-45616324	not_differential	FALSE
OCR_100899	chr21	45615900	45617158	AP001058.3	ENSG00000232698.1	HiC_8hr_4kb:HiC_24hr_4kb	rs4456788	8.735e-19	chr21	45616324	78.3263	1.0194e+17	0.0365796	rs7282490	0.866722	CRO	chr21:45616324-45616324	not_differential	FALSE
OCR_100899	chr21	45615900	45617158	AP001058.3	ENSG00000232698.1	HiC_8hr_4kb:HiC_24hr_4kb	rs4456788	8.348e-24	chr21	45616324	101.192	9.41009e+21	0.0359769	rs7282490	0.843591	IBD	chr21:45616324-45616324	not_differential	FALSE
OCR_100899	chr21	45615900	45617158	AP001058.3	ENSG00000232698.1	HiC_8hr_4kb:HiC_24hr_4kb	rs4456788	2.86e-13	chr21	45616324	53.3021	3.75323e+11	0.0607981	rs7282490	0.307553	UC	chr21:45616324-45616324	not_differential	FALSE
OCR_100899	chr21	45615900	45617158	AP001058.3	ENSG00000232698.1	HiC_8hr_4kb:HiC_24hr_4kb	rs8134436	8.56864e-08	chr21	45616497	28.6731	1.68376e+06	0.0263952	rs7282490	0.850845	AS	chr21:45616497-45616497	not_differential	FALSE
OCR_100899	chr21	45615900	45617158	AP001058.3	ENSG00000232698.1	HiC_8hr_4kb:HiC_24hr_4kb	rs8134436	6.775e-19	chr21	45616497	78.8283	1.31022e+17	0.0470152	rs7282490	0.542179	CRO	chr21:45616497-45616497	not_differential	FALSE
OCR_100899	chr21	45615900	45617158	AP001058.3	ENSG00000232698.1	HiC_8hr_4kb:HiC_24hr_4kb	rs8134436	5.764e-24	chr21	45616497	101.926	1.35804e+22	0.051921	rs7282490	0.546531	IBD	chr21:45616497-45616497	not_differential	FALSE
OCR_100899	chr21	45615900	45617158	AP001058.3	ENSG00000232698.1	HiC_8hr_4kb:HiC_24hr_4kb	rs8134436	4.555e-13	chr21	45616497	52.388	2.37634e+11	0.0384941	rs7282490	0.775345	UC	chr21:45616497-45616497	not_differential	FALSE
OCR_100899	chr21	45615900	45617158	AP001058.3	ENSG00000232698.1	HiC_8hr_4kb:HiC_24hr_4kb	rs2070551	8.85336e-08	chr21	45616672	28.6098	1.63131e+06	0.0255729	rs7282490	0.876418	AS	chr21:45616672-45616672	not_differential	FALSE
OCR_100899	chr21	45615900	45617158	AP001058.3	ENSG00000232698.1	HiC_8hr_4kb:HiC_24hr_4kb	rs2070551	5.952e-19	chr21	45616672	79.0841	1.48903e+17	0.0534316	rs7282490	0.447901	CRO	chr21:45616672-45616672	not_differential	FALSE
OCR_100899	chr21	45615900	45617158	AP001058.3	ENSG00000232698.1	HiC_8hr_4kb:HiC_24hr_4kb	rs2070551	4.426e-24	chr21	45616672	102.449	1.76415e+22	0.0674473	rs7282490	0.379953	IBD	chr21:45616672-45616672	not_differential	FALSE
OCR_100899	chr21	45615900	45617158	AP001058.3	ENSG00000232698.1	HiC_8hr_4kb:HiC_24hr_4kb	rs2070551	2.147e-13	chr21	45616672	53.8655	4.97432e+11	0.0805786	rs7282490	0.177612	UC	chr21:45616672-45616672	not_differential	FALSE
OCR_100899	chr21	45615900	45617158	AP001058.3	ENSG00000232698.1	HiC_8hr_4kb:HiC_24hr_4kb	rs2070552	1.372e-18	chr21	45617069	77.4345	6.52651e+16	0.0234193	rs7282490	0.920613	CRO	chr21:45617069-45617069	not_differential	FALSE
OCR_100899	chr21	45615900	45617158	AP001058.3	ENSG00000232698.1	HiC_8hr_4kb:HiC_24hr_4kb	rs2070552	5.974e-24	chr21	45617069	101.855	1.31075e+22	0.0501129	rs7282490	0.596644	IBD	chr21:45617069-45617069	not_differential	FALSE
OCR_100899	chr21	45615900	45617158	AP001058.3	ENSG00000232698.1	HiC_8hr_4kb:HiC_24hr_4kb	rs2070552	2.94e-13	chr21	45617069	53.2479	3.65289e+11	0.0591728	rs7282490	0.366726	UC	chr21:45617069-45617069	not_differential	FALSE
OCR_100899	chr21	45615900	45617158	PFKL	ENSG00000141959.12	HiC_0hr_4kb	rs2838521	7.747e-19	chr21	45615917	78.5634	1.14772e+17	0.0411839	rs7282490	0.712278	CRO	chr21:45615917-45615917	5	FALSE
OCR_100899	chr21	45615900	45617158	PFKL	ENSG00000141959.12	HiC_0hr_4kb	rs2838521	5.528e-24	chr21	45615917	102.009	1.41545e+22	0.054116	rs7282490	0.49461	IBD	chr21:45615917-45615917	5	FALSE
OCR_100899	chr21	45615900	45617158	PFKL	ENSG00000141959.12	HiC_0hr_4kb	rs2838521	3.469e-13	chr21	45615917	52.9229	3.10501e+11	0.0502978	rs7282490	0.467407	UC	chr21:45615917-45615917	5	FALSE
OCR_100899	chr21	45615900	45617158	PFKL	ENSG00000141959.12	HiC_0hr_4kb	rs4635612	7.868e-19	chr21	45615963	78.5328	1.13028e+17	0.0405583	rs7282490	0.752836	CRO	chr21:45615963-45615963	5	FALSE
OCR_100899	chr21	45615900	45617158	PFKL	ENSG00000141959.12	HiC_0hr_4kb	rs4635612	6.252e-24	chr21	45615963	101.765	1.25301e+22	0.0479054	rs7282490	0.64455	IBD	chr21:45615963-45615963	5	FALSE
OCR_100899	chr21	45615900	45617158	PFKL	ENSG00000141959.12	HiC_0hr_4kb	rs4635612	4.55e-13	chr21	45615963	52.3902	2.3789e+11	0.0385356	rs7282490	0.736851	UC	chr21:45615963-45615963	5	FALSE
OCR_100899	chr21	45615900	45617158	PFKL	ENSG00000141959.12	HiC_0hr_4kb	rs4380337	2.35107e-08	chr21	45616049	31.1806	5.89896e+06	0.0924739	rs7282490	0.711759	AS	chr21:45616049-45616049	5	FALSE
OCR_100899	chr21	45615900	45617158	PFKL	ENSG00000141959.12	HiC_0hr_4kb	rs4380337	1.001e-23	chr21	45616049	100.833	7.86141e+21	0.030056	rs7282490	0.873647	IBD	chr21:45616049-45616049	5	FALSE
OCR_100899	chr21	45615900	45617158	PFKL	ENSG00000141959.12	HiC_0hr_4kb	rs4380337	3.939e-13	chr21	45616049	52.6733	2.74077e+11	0.0443974	rs7282490	0.656245	UC	chr21:45616049-45616049	5	FALSE
OCR_100899	chr21	45615900	45617158	PFKL	ENSG00000141959.12	HiC_0hr_4kb	rs4317019	7.656e-19	chr21	45616275	78.5868	1.16119e+17	0.0416674	rs7282490	0.671094	CRO	chr21:45616275-45616275	5	FALSE
OCR_100899	chr21	45615900	45617158	PFKL	ENSG00000141959.12	HiC_0hr_4kb	rs4317019	4.284e-24	chr21	45616275	102.514	1.82206e+22	0.0696614	rs7282490	0.312506	IBD	chr21:45616275-45616275	5	FALSE
OCR_100899	chr21	45615900	45617158	PFKL	ENSG00000141959.12	HiC_0hr_4kb	rs4317019	2.509e-13	chr21	45616275	53.5593	4.26836e+11	0.0691427	rs7282490	0.246755	UC	chr21:45616275-45616275	5	FALSE
OCR_100899	chr21	45615900	45617158	PFKL	ENSG00000141959.12	HiC_0hr_4kb	rs4456788	1.13514e-07	chr21	45616324	28.1286	1.2825e+06	0.0201048	rs7282490	0.962807	AS	chr21:45616324-45616324	5	FALSE
OCR_100899	chr21	45615900	45617158	PFKL	ENSG00000141959.12	HiC_0hr_4kb	rs4456788	8.735e-19	chr21	45616324	78.3263	1.0194e+17	0.0365796	rs7282490	0.866722	CRO	chr21:45616324-45616324	5	FALSE
OCR_100899	chr21	45615900	45617158	PFKL	ENSG00000141959.12	HiC_0hr_4kb	rs4456788	8.348e-24	chr21	45616324	101.192	9.41009e+21	0.0359769	rs7282490	0.843591	IBD	chr21:45616324-45616324	5	FALSE
OCR_100899	chr21	45615900	45617158	PFKL	ENSG00000141959.12	HiC_0hr_4kb	rs4456788	2.86e-13	chr21	45616324	53.3021	3.75323e+11	0.0607981	rs7282490	0.307553	UC	chr21:45616324-45616324	5	FALSE
OCR_100899	chr21	45615900	45617158	PFKL	ENSG00000141959.12	HiC_0hr_4kb	rs8134436	8.56864e-08	chr21	45616497	28.6731	1.68376e+06	0.0263952	rs7282490	0.850845	AS	chr21:45616497-45616497	5	FALSE
OCR_100899	chr21	45615900	45617158	PFKL	ENSG00000141959.12	HiC_0hr_4kb	rs8134436	6.775e-19	chr21	45616497	78.8283	1.31022e+17	0.0470152	rs7282490	0.542179	CRO	chr21:45616497-45616497	5	FALSE
OCR_100899	chr21	45615900	45617158	PFKL	ENSG00000141959.12	HiC_0hr_4kb	rs8134436	5.764e-24	chr21	45616497	101.926	1.35804e+22	0.051921	rs7282490	0.546531	IBD	chr21:45616497-45616497	5	FALSE
OCR_100899	chr21	45615900	45617158	PFKL	ENSG00000141959.12	HiC_0hr_4kb	rs8134436	4.555e-13	chr21	45616497	52.388	2.37634e+11	0.0384941	rs7282490	0.775345	UC	chr21:45616497-45616497	5	FALSE
OCR_100899	chr21	45615900	45617158	PFKL	ENSG00000141959.12	HiC_0hr_4kb	rs2070551	8.85336e-08	chr21	45616672	28.6098	1.63131e+06	0.0255729	rs7282490	0.876418	AS	chr21:45616672-45616672	5	FALSE
OCR_100899	chr21	45615900	45617158	PFKL	ENSG00000141959.12	HiC_0hr_4kb	rs2070551	5.952e-19	chr21	45616672	79.0841	1.48903e+17	0.0534316	rs7282490	0.447901	CRO	chr21:45616672-45616672	5	FALSE
OCR_100899	chr21	45615900	45617158	PFKL	ENSG00000141959.12	HiC_0hr_4kb	rs2070551	4.426e-24	chr21	45616672	102.449	1.76415e+22	0.0674473	rs7282490	0.379953	IBD	chr21:45616672-45616672	5	FALSE
OCR_100899	chr21	45615900	45617158	PFKL	ENSG00000141959.12	HiC_0hr_4kb	rs2070551	2.147e-13	chr21	45616672	53.8655	4.97432e+11	0.0805786	rs7282490	0.177612	UC	chr21:45616672-45616672	5	FALSE
OCR_100899	chr21	45615900	45617158	PFKL	ENSG00000141959.12	HiC_0hr_4kb	rs2070552	1.372e-18	chr21	45617069	77.4345	6.52651e+16	0.0234193	rs7282490	0.920613	CRO	chr21:45617069-45617069	5	FALSE
OCR_100899	chr21	45615900	45617158	PFKL	ENSG00000141959.12	HiC_0hr_4kb	rs2070552	5.974e-24	chr21	45617069	101.855	1.31075e+22	0.0501129	rs7282490	0.596644	IBD	chr21:45617069-45617069	5	FALSE
OCR_100899	chr21	45615900	45617158	PFKL	ENSG00000141959.12	HiC_0hr_4kb	rs2070552	2.94e-13	chr21	45617069	53.2479	3.65289e+11	0.0591728	rs7282490	0.366726	UC	chr21:45617069-45617069	5	FALSE
OCR_100900	chr21	45626470	45627681	AP001055.6	ENSG00000225331.1	HiC_0hr_4kb:HiC_8hr_4kb:HiC_24hr_4kb	rs55708341	4.61495e-07	chr21	45627581	25.4184	330778	0.0377592	rs6518350	0.973275	T1D	chr21:45627581-45627581	not_differential	FALSE
OCR_100900	chr21	45626470	45627681	PFKL	ENSG00000141959.12	HiC_0hr_4kb	rs55708341	4.61495e-07	chr21	45627581	25.4184	330778	0.0377592	rs6518350	0.973275	T1D	chr21:45627581-45627581	5	FALSE
OCR_100901	chr21	45627930	45628204	AP001055.6	ENSG00000225331.1	HiC_0hr_4kb:HiC_8hr_4kb:HiC_24hr_4kb	rs2838522	0.0002442	chr21	45627976	13.4562	835.551	0.0873711	rs4819388	0.819336	CEL	chr21:45627976-45627976	not_differential	FALSE
OCR_100901	chr21	45627930	45628204	AP001057.1	ENSG00000232124.1	HiC_8hr_4kb	rs2838522	0.0002442	chr21	45627976	13.4562	835.551	0.0873711	rs4819388	0.819336	CEL	chr21:45627976-45627976	not_differential	FALSE
OCR_100901	chr21	45627930	45628204	C21orf33	ENSG00000160221.12	HiC_0hr_4kb	rs2838522	0.0002442	chr21	45627976	13.4562	835.551	0.0873711	rs4819388	0.819336	CEL	chr21:45627976-45627976	not_differential	FALSE
OCR_100901	chr21	45627930	45628204	PFKL	ENSG00000141959.12	HiC_0hr_4kb	rs2838522	0.0002442	chr21	45627976	13.4562	835.551	0.0873711	rs4819388	0.819336	CEL	chr21:45627976-45627976	5	FALSE
OCR_101345	chr22	21921533	21922765	CCDC116	ENSG00000161180.6	HiC_0hr_4kb:HiC_8hr_4kb:HiC_24hr_4kb	rs140490	1.25e-14	chr22	21921686	59.4569	8.14533e+12	0.00550706	rs2266959	0.947566	IBD	chr22:21921686-21921686	not_differential	FALSE
OCR_101345	chr22	21921533	21922765	CCDC116	ENSG00000161180.6	HiC_0hr_4kb:HiC_8hr_4kb:HiC_24hr_4kb	rs140490	1.8e-05	chr22	21921686	18.39	9847.78	0.0076749	rs11089637	0.771916	RA	chr22:21921686-21921686	not_differential	FALSE
OCR_101345	chr22	21921533	21922765	CCDC116	ENSG00000161180.6	HiC_0hr_4kb:HiC_8hr_4kb:HiC_24hr_4kb	rs140490	8.35415e-10	chr22	21921686	37.6756	1.51761e+08	0.00860487	rs131658	0.751014	SLE	chr22:21921686-21921686	not_differential	FALSE
OCR_101345	chr22	21921533	21922765	CCDC116	ENSG00000161180.6	HiC_0hr_4kb:HiC_8hr_4kb:HiC_24hr_4kb	rs140490	1.014e-05	chr22	21921686	19.4849	17024.9	0.0129033	rs2266959	0.570974	UC	chr22:21921686-21921686	not_differential	FALSE
OCR_101345	chr22	21921533	21922765	CCDC116	ENSG00000161180.6	HiC_0hr_4kb:HiC_8hr_4kb:HiC_24hr_4kb	rs140491	6.157e-15	chr22	21922364	60.8508	1.63521e+13	0.0110556	rs2266959	0.763408	IBD	chr22:21922364-21922364	not_differential	FALSE
OCR_101345	chr22	21921533	21922765	CCDC116	ENSG00000161180.6	HiC_0hr_4kb:HiC_8hr_4kb:HiC_24hr_4kb	rs140491	2e-05	chr22	21922364	18.1893	8907.48	0.00694208	rs11089637	0.934055	RA	chr22:21922364-21922364	not_differential	FALSE
OCR_101345	chr22	21921533	21922765	CCDC116	ENSG00000161180.6	HiC_0hr_4kb:HiC_8hr_4kb:HiC_24hr_4kb	rs140491	5.49146e-10	chr22	21922364	38.4943	2.2852e+08	0.0129571	rs131658	0.398107	SLE	chr22:21922364-21922364	not_differential	FALSE
OCR_101345	chr22	21921533	21922765	CCDC116	ENSG00000161180.6	HiC_0hr_4kb:HiC_8hr_4kb:HiC_24hr_4kb	rs140491	6.787e-06	chr22	21922364	20.2524	24988.6	0.0189391	rs2266959	0.220916	UC	chr22:21922364-21922364	not_differential	FALSE
OCR_101345	chr22	21921533	21922765	CCDC116	ENSG00000161180.6	HiC_0hr_4kb:HiC_8hr_4kb:HiC_24hr_4kb	rs11089620	3.094e-15	chr22	21922456	62.2056	3.21947e+13	0.00647752	rs2266959	0.903349	CRO	chr22:21922456-21922456	not_differential	FALSE
OCR_101345	chr22	21921533	21922765	CCDC116	ENSG00000161180.6	HiC_0hr_4kb:HiC_8hr_4kb:HiC_24hr_4kb	rs11089620	3.73e-15	chr22	21922456	61.8375	2.67822e+13	0.0181074	rs2266959	0.374736	IBD	chr22:21922456-21922456	not_differential	FALSE
OCR_101345	chr22	21921533	21922765	CCDC116	ENSG00000161180.6	HiC_0hr_4kb:HiC_8hr_4kb:HiC_24hr_4kb	rs11089620	7.7e-06	chr22	21922456	20.0109	22147.4	0.0172606	rs11089637	0.127355	RA	chr22:21922456-21922456	not_differential	FALSE
OCR_101345	chr22	21921533	21922765	CCDC116	ENSG00000161180.6	HiC_0hr_4kb:HiC_8hr_4kb:HiC_24hr_4kb	rs11089620	1.71348e-09	chr22	21922456	36.275	7.53383e+07	0.00427169	rs131658	0.91297	SLE	chr22:21922456-21922456	not_differential	FALSE
OCR_101345	chr22	21921533	21922765	CCDC116	ENSG00000161180.6	HiC_0hr_4kb:HiC_8hr_4kb:HiC_24hr_4kb	rs11089620	6.745e-06	chr22	21922456	20.2642	25137.4	0.0190519	rs2266959	0.18297	UC	chr22:21922456-21922456	not_differential	FALSE
OCR_101345	chr22	21921533	21922765	KB-1440D3.14	ENSG00000273342.1	HiC_0hr_4kb:HiC_8hr_4kb:HiC_24hr_4kb	rs140490	1.25e-14	chr22	21921686	59.4569	8.14533e+12	0.00550706	rs2266959	0.947566	IBD	chr22:21921686-21921686	not_differential	FALSE
OCR_101345	chr22	21921533	21922765	KB-1440D3.14	ENSG00000273342.1	HiC_0hr_4kb:HiC_8hr_4kb:HiC_24hr_4kb	rs140490	1.8e-05	chr22	21921686	18.39	9847.78	0.0076749	rs11089637	0.771916	RA	chr22:21921686-21921686	not_differential	FALSE
OCR_101345	chr22	21921533	21922765	KB-1440D3.14	ENSG00000273342.1	HiC_0hr_4kb:HiC_8hr_4kb:HiC_24hr_4kb	rs140490	8.35415e-10	chr22	21921686	37.6756	1.51761e+08	0.00860487	rs131658	0.751014	SLE	chr22:21921686-21921686	not_differential	FALSE
OCR_101345	chr22	21921533	21922765	KB-1440D3.14	ENSG00000273342.1	HiC_0hr_4kb:HiC_8hr_4kb:HiC_24hr_4kb	rs140490	1.014e-05	chr22	21921686	19.4849	17024.9	0.0129033	rs2266959	0.570974	UC	chr22:21921686-21921686	not_differential	FALSE
OCR_101345	chr22	21921533	21922765	KB-1440D3.14	ENSG00000273342.1	HiC_0hr_4kb:HiC_8hr_4kb:HiC_24hr_4kb	rs140491	6.157e-15	chr22	21922364	60.8508	1.63521e+13	0.0110556	rs2266959	0.763408	IBD	chr22:21922364-21922364	not_differential	FALSE
OCR_101345	chr22	21921533	21922765	KB-1440D3.14	ENSG00000273342.1	HiC_0hr_4kb:HiC_8hr_4kb:HiC_24hr_4kb	rs140491	2e-05	chr22	21922364	18.1893	8907.48	0.00694208	rs11089637	0.934055	RA	chr22:21922364-21922364	not_differential	FALSE
OCR_101345	chr22	21921533	21922765	KB-1440D3.14	ENSG00000273342.1	HiC_0hr_4kb:HiC_8hr_4kb:HiC_24hr_4kb	rs140491	5.49146e-10	chr22	21922364	38.4943	2.2852e+08	0.0129571	rs131658	0.398107	SLE	chr22:21922364-21922364	not_differential	FALSE
OCR_101345	chr22	21921533	21922765	KB-1440D3.14	ENSG00000273342.1	HiC_0hr_4kb:HiC_8hr_4kb:HiC_24hr_4kb	rs140491	6.787e-06	chr22	21922364	20.2524	24988.6	0.0189391	rs2266959	0.220916	UC	chr22:21922364-21922364	not_differential	FALSE
OCR_101345	chr22	21921533	21922765	KB-1440D3.14	ENSG00000273342.1	HiC_0hr_4kb:HiC_8hr_4kb:HiC_24hr_4kb	rs11089620	3.094e-15	chr22	21922456	62.2056	3.21947e+13	0.00647752	rs2266959	0.903349	CRO	chr22:21922456-21922456	not_differential	FALSE
OCR_101345	chr22	21921533	21922765	KB-1440D3.14	ENSG00000273342.1	HiC_0hr_4kb:HiC_8hr_4kb:HiC_24hr_4kb	rs11089620	3.73e-15	chr22	21922456	61.8375	2.67822e+13	0.0181074	rs2266959	0.374736	IBD	chr22:21922456-21922456	not_differential	FALSE
OCR_101345	chr22	21921533	21922765	KB-1440D3.14	ENSG00000273342.1	HiC_0hr_4kb:HiC_8hr_4kb:HiC_24hr_4kb	rs11089620	7.7e-06	chr22	21922456	20.0109	22147.4	0.0172606	rs11089637	0.127355	RA	chr22:21922456-21922456	not_differential	FALSE
OCR_101345	chr22	21921533	21922765	KB-1440D3.14	ENSG00000273342.1	HiC_0hr_4kb:HiC_8hr_4kb:HiC_24hr_4kb	rs11089620	1.71348e-09	chr22	21922456	36.275	7.53383e+07	0.00427169	rs131658	0.91297	SLE	chr22:21922456-21922456	not_differential	FALSE
OCR_101345	chr22	21921533	21922765	KB-1440D3.14	ENSG00000273342.1	HiC_0hr_4kb:HiC_8hr_4kb:HiC_24hr_4kb	rs11089620	6.745e-06	chr22	21922456	20.2642	25137.4	0.0190519	rs2266959	0.18297	UC	chr22:21922456-21922456	not_differential	FALSE
OCR_101345	chr22	21921533	21922765	MIR130B	ENSG00000207751.1	HiC_0hr_4kb	rs140490	1.25e-14	chr22	21921686	59.4569	8.14533e+12	0.00550706	rs2266959	0.947566	IBD	chr22:21921686-21921686	not_differential	FALSE
OCR_101345	chr22	21921533	21922765	MIR130B	ENSG00000207751.1	HiC_0hr_4kb	rs140490	1.8e-05	chr22	21921686	18.39	9847.78	0.0076749	rs11089637	0.771916	RA	chr22:21921686-21921686	not_differential	FALSE
OCR_101345	chr22	21921533	21922765	MIR130B	ENSG00000207751.1	HiC_0hr_4kb	rs140490	8.35415e-10	chr22	21921686	37.6756	1.51761e+08	0.00860487	rs131658	0.751014	SLE	chr22:21921686-21921686	not_differential	FALSE
OCR_101345	chr22	21921533	21922765	MIR130B	ENSG00000207751.1	HiC_0hr_4kb	rs140490	1.014e-05	chr22	21921686	19.4849	17024.9	0.0129033	rs2266959	0.570974	UC	chr22:21921686-21921686	not_differential	FALSE
OCR_101345	chr22	21921533	21922765	MIR130B	ENSG00000207751.1	HiC_0hr_4kb	rs140491	6.157e-15	chr22	21922364	60.8508	1.63521e+13	0.0110556	rs2266959	0.763408	IBD	chr22:21922364-21922364	not_differential	FALSE
OCR_101345	chr22	21921533	21922765	MIR130B	ENSG00000207751.1	HiC_0hr_4kb	rs140491	2e-05	chr22	21922364	18.1893	8907.48	0.00694208	rs11089637	0.934055	RA	chr22:21922364-21922364	not_differential	FALSE
OCR_101345	chr22	21921533	21922765	MIR130B	ENSG00000207751.1	HiC_0hr_4kb	rs140491	5.49146e-10	chr22	21922364	38.4943	2.2852e+08	0.0129571	rs131658	0.398107	SLE	chr22:21922364-21922364	not_differential	FALSE
OCR_101345	chr22	21921533	21922765	MIR130B	ENSG00000207751.1	HiC_0hr_4kb	rs140491	6.787e-06	chr22	21922364	20.2524	24988.6	0.0189391	rs2266959	0.220916	UC	chr22:21922364-21922364	not_differential	FALSE
OCR_101345	chr22	21921533	21922765	MIR130B	ENSG00000207751.1	HiC_0hr_4kb	rs11089620	3.094e-15	chr22	21922456	62.2056	3.21947e+13	0.00647752	rs2266959	0.903349	CRO	chr22:21922456-21922456	not_differential	FALSE
OCR_101345	chr22	21921533	21922765	MIR130B	ENSG00000207751.1	HiC_0hr_4kb	rs11089620	3.73e-15	chr22	21922456	61.8375	2.67822e+13	0.0181074	rs2266959	0.374736	IBD	chr22:21922456-21922456	not_differential	FALSE
OCR_101345	chr22	21921533	21922765	MIR130B	ENSG00000207751.1	HiC_0hr_4kb	rs11089620	7.7e-06	chr22	21922456	20.0109	22147.4	0.0172606	rs11089637	0.127355	RA	chr22:21922456-21922456	not_differential	FALSE
OCR_101345	chr22	21921533	21922765	MIR130B	ENSG00000207751.1	HiC_0hr_4kb	rs11089620	1.71348e-09	chr22	21922456	36.275	7.53383e+07	0.00427169	rs131658	0.91297	SLE	chr22:21922456-21922456	not_differential	FALSE
OCR_101345	chr22	21921533	21922765	MIR130B	ENSG00000207751.1	HiC_0hr_4kb	rs11089620	6.745e-06	chr22	21922456	20.2642	25137.4	0.0190519	rs2266959	0.18297	UC	chr22:21922456-21922456	not_differential	FALSE
OCR_101345	chr22	21921533	21922765	MIR301B	ENSG00000212102.1	HiC_0hr_4kb	rs140490	1.25e-14	chr22	21921686	59.4569	8.14533e+12	0.00550706	rs2266959	0.947566	IBD	chr22:21921686-21921686	not_differential	FALSE
OCR_101345	chr22	21921533	21922765	MIR301B	ENSG00000212102.1	HiC_0hr_4kb	rs140490	1.8e-05	chr22	21921686	18.39	9847.78	0.0076749	rs11089637	0.771916	RA	chr22:21921686-21921686	not_differential	FALSE
OCR_101345	chr22	21921533	21922765	MIR301B	ENSG00000212102.1	HiC_0hr_4kb	rs140490	8.35415e-10	chr22	21921686	37.6756	1.51761e+08	0.00860487	rs131658	0.751014	SLE	chr22:21921686-21921686	not_differential	FALSE
OCR_101345	chr22	21921533	21922765	MIR301B	ENSG00000212102.1	HiC_0hr_4kb	rs140490	1.014e-05	chr22	21921686	19.4849	17024.9	0.0129033	rs2266959	0.570974	UC	chr22:21921686-21921686	not_differential	FALSE
OCR_101345	chr22	21921533	21922765	MIR301B	ENSG00000212102.1	HiC_0hr_4kb	rs140491	6.157e-15	chr22	21922364	60.8508	1.63521e+13	0.0110556	rs2266959	0.763408	IBD	chr22:21922364-21922364	not_differential	FALSE
OCR_101345	chr22	21921533	21922765	MIR301B	ENSG00000212102.1	HiC_0hr_4kb	rs140491	2e-05	chr22	21922364	18.1893	8907.48	0.00694208	rs11089637	0.934055	RA	chr22:21922364-21922364	not_differential	FALSE
OCR_101345	chr22	21921533	21922765	MIR301B	ENSG00000212102.1	HiC_0hr_4kb	rs140491	5.49146e-10	chr22	21922364	38.4943	2.2852e+08	0.0129571	rs131658	0.398107	SLE	chr22:21922364-21922364	not_differential	FALSE
OCR_101345	chr22	21921533	21922765	MIR301B	ENSG00000212102.1	HiC_0hr_4kb	rs140491	6.787e-06	chr22	21922364	20.2524	24988.6	0.0189391	rs2266959	0.220916	UC	chr22:21922364-21922364	not_differential	FALSE
OCR_101345	chr22	21921533	21922765	MIR301B	ENSG00000212102.1	HiC_0hr_4kb	rs11089620	3.094e-15	chr22	21922456	62.2056	3.21947e+13	0.00647752	rs2266959	0.903349	CRO	chr22:21922456-21922456	not_differential	FALSE
OCR_101345	chr22	21921533	21922765	MIR301B	ENSG00000212102.1	HiC_0hr_4kb	rs11089620	3.73e-15	chr22	21922456	61.8375	2.67822e+13	0.0181074	rs2266959	0.374736	IBD	chr22:21922456-21922456	not_differential	FALSE
OCR_101345	chr22	21921533	21922765	MIR301B	ENSG00000212102.1	HiC_0hr_4kb	rs11089620	7.7e-06	chr22	21922456	20.0109	22147.4	0.0172606	rs11089637	0.127355	RA	chr22:21922456-21922456	not_differential	FALSE
OCR_101345	chr22	21921533	21922765	MIR301B	ENSG00000212102.1	HiC_0hr_4kb	rs11089620	1.71348e-09	chr22	21922456	36.275	7.53383e+07	0.00427169	rs131658	0.91297	SLE	chr22:21922456-21922456	not_differential	FALSE
OCR_101345	chr22	21921533	21922765	MIR301B	ENSG00000212102.1	HiC_0hr_4kb	rs11089620	6.745e-06	chr22	21922456	20.2642	25137.4	0.0190519	rs2266959	0.18297	UC	chr22:21922456-21922456	not_differential	FALSE
OCR_101345	chr22	21921533	21922765	PPIL2	ENSG00000100023.13	HiC_0hr_4kb	rs140490	1.25e-14	chr22	21921686	59.4569	8.14533e+12	0.00550706	rs2266959	0.947566	IBD	chr22:21921686-21921686	not_differential	FALSE
OCR_101345	chr22	21921533	21922765	PPIL2	ENSG00000100023.13	HiC_0hr_4kb	rs140490	1.8e-05	chr22	21921686	18.39	9847.78	0.0076749	rs11089637	0.771916	RA	chr22:21921686-21921686	not_differential	FALSE
OCR_101345	chr22	21921533	21922765	PPIL2	ENSG00000100023.13	HiC_0hr_4kb	rs140490	8.35415e-10	chr22	21921686	37.6756	1.51761e+08	0.00860487	rs131658	0.751014	SLE	chr22:21921686-21921686	not_differential	FALSE
OCR_101345	chr22	21921533	21922765	PPIL2	ENSG00000100023.13	HiC_0hr_4kb	rs140490	1.014e-05	chr22	21921686	19.4849	17024.9	0.0129033	rs2266959	0.570974	UC	chr22:21921686-21921686	not_differential	FALSE
OCR_101345	chr22	21921533	21922765	PPIL2	ENSG00000100023.13	HiC_0hr_4kb	rs140491	6.157e-15	chr22	21922364	60.8508	1.63521e+13	0.0110556	rs2266959	0.763408	IBD	chr22:21922364-21922364	not_differential	FALSE
OCR_101345	chr22	21921533	21922765	PPIL2	ENSG00000100023.13	HiC_0hr_4kb	rs140491	2e-05	chr22	21922364	18.1893	8907.48	0.00694208	rs11089637	0.934055	RA	chr22:21922364-21922364	not_differential	FALSE
OCR_101345	chr22	21921533	21922765	PPIL2	ENSG00000100023.13	HiC_0hr_4kb	rs140491	5.49146e-10	chr22	21922364	38.4943	2.2852e+08	0.0129571	rs131658	0.398107	SLE	chr22:21922364-21922364	not_differential	FALSE
OCR_101345	chr22	21921533	21922765	PPIL2	ENSG00000100023.13	HiC_0hr_4kb	rs140491	6.787e-06	chr22	21922364	20.2524	24988.6	0.0189391	rs2266959	0.220916	UC	chr22:21922364-21922364	not_differential	FALSE
OCR_101345	chr22	21921533	21922765	PPIL2	ENSG00000100023.13	HiC_0hr_4kb	rs11089620	3.094e-15	chr22	21922456	62.2056	3.21947e+13	0.00647752	rs2266959	0.903349	CRO	chr22:21922456-21922456	not_differential	FALSE
OCR_101345	chr22	21921533	21922765	PPIL2	ENSG00000100023.13	HiC_0hr_4kb	rs11089620	3.73e-15	chr22	21922456	61.8375	2.67822e+13	0.0181074	rs2266959	0.374736	IBD	chr22:21922456-21922456	not_differential	FALSE
OCR_101345	chr22	21921533	21922765	PPIL2	ENSG00000100023.13	HiC_0hr_4kb	rs11089620	7.7e-06	chr22	21922456	20.0109	22147.4	0.0172606	rs11089637	0.127355	RA	chr22:21922456-21922456	not_differential	FALSE
OCR_101345	chr22	21921533	21922765	PPIL2	ENSG00000100023.13	HiC_0hr_4kb	rs11089620	1.71348e-09	chr22	21922456	36.275	7.53383e+07	0.00427169	rs131658	0.91297	SLE	chr22:21922456-21922456	not_differential	FALSE
OCR_101345	chr22	21921533	21922765	PPIL2	ENSG00000100023.13	HiC_0hr_4kb	rs11089620	6.745e-06	chr22	21922456	20.2642	25137.4	0.0190519	rs2266959	0.18297	UC	chr22:21922456-21922456	not_differential	FALSE
OCR_101345	chr22	21921533	21922765	SDF2L1	ENSG00000128228.4	HiC_0hr_4kb:HiC_8hr_4kb:HiC_24hr_4kb	rs140490	1.25e-14	chr22	21921686	59.4569	8.14533e+12	0.00550706	rs2266959	0.947566	IBD	chr22:21921686-21921686	1	FALSE
OCR_101345	chr22	21921533	21922765	SDF2L1	ENSG00000128228.4	HiC_0hr_4kb:HiC_8hr_4kb:HiC_24hr_4kb	rs140490	1.8e-05	chr22	21921686	18.39	9847.78	0.0076749	rs11089637	0.771916	RA	chr22:21921686-21921686	1	FALSE
OCR_101345	chr22	21921533	21922765	SDF2L1	ENSG00000128228.4	HiC_0hr_4kb:HiC_8hr_4kb:HiC_24hr_4kb	rs140490	8.35415e-10	chr22	21921686	37.6756	1.51761e+08	0.00860487	rs131658	0.751014	SLE	chr22:21921686-21921686	1	FALSE
OCR_101345	chr22	21921533	21922765	SDF2L1	ENSG00000128228.4	HiC_0hr_4kb:HiC_8hr_4kb:HiC_24hr_4kb	rs140490	1.014e-05	chr22	21921686	19.4849	17024.9	0.0129033	rs2266959	0.570974	UC	chr22:21921686-21921686	1	FALSE
OCR_101345	chr22	21921533	21922765	SDF2L1	ENSG00000128228.4	HiC_0hr_4kb:HiC_8hr_4kb:HiC_24hr_4kb	rs140491	6.157e-15	chr22	21922364	60.8508	1.63521e+13	0.0110556	rs2266959	0.763408	IBD	chr22:21922364-21922364	1	FALSE
OCR_101345	chr22	21921533	21922765	SDF2L1	ENSG00000128228.4	HiC_0hr_4kb:HiC_8hr_4kb:HiC_24hr_4kb	rs140491	2e-05	chr22	21922364	18.1893	8907.48	0.00694208	rs11089637	0.934055	RA	chr22:21922364-21922364	1	FALSE
OCR_101345	chr22	21921533	21922765	SDF2L1	ENSG00000128228.4	HiC_0hr_4kb:HiC_8hr_4kb:HiC_24hr_4kb	rs140491	5.49146e-10	chr22	21922364	38.4943	2.2852e+08	0.0129571	rs131658	0.398107	SLE	chr22:21922364-21922364	1	FALSE
OCR_101345	chr22	21921533	21922765	SDF2L1	ENSG00000128228.4	HiC_0hr_4kb:HiC_8hr_4kb:HiC_24hr_4kb	rs140491	6.787e-06	chr22	21922364	20.2524	24988.6	0.0189391	rs2266959	0.220916	UC	chr22:21922364-21922364	1	FALSE
OCR_101345	chr22	21921533	21922765	SDF2L1	ENSG00000128228.4	HiC_0hr_4kb:HiC_8hr_4kb:HiC_24hr_4kb	rs11089620	3.094e-15	chr22	21922456	62.2056	3.21947e+13	0.00647752	rs2266959	0.903349	CRO	chr22:21922456-21922456	1	FALSE
OCR_101345	chr22	21921533	21922765	SDF2L1	ENSG00000128228.4	HiC_0hr_4kb:HiC_8hr_4kb:HiC_24hr_4kb	rs11089620	3.73e-15	chr22	21922456	61.8375	2.67822e+13	0.0181074	rs2266959	0.374736	IBD	chr22:21922456-21922456	1	FALSE
OCR_101345	chr22	21921533	21922765	SDF2L1	ENSG00000128228.4	HiC_0hr_4kb:HiC_8hr_4kb:HiC_24hr_4kb	rs11089620	7.7e-06	chr22	21922456	20.0109	22147.4	0.0172606	rs11089637	0.127355	RA	chr22:21922456-21922456	1	FALSE
OCR_101345	chr22	21921533	21922765	SDF2L1	ENSG00000128228.4	HiC_0hr_4kb:HiC_8hr_4kb:HiC_24hr_4kb	rs11089620	1.71348e-09	chr22	21922456	36.275	7.53383e+07	0.00427169	rs131658	0.91297	SLE	chr22:21922456-21922456	1	FALSE
OCR_101345	chr22	21921533	21922765	SDF2L1	ENSG00000128228.4	HiC_0hr_4kb:HiC_8hr_4kb:HiC_24hr_4kb	rs11089620	6.745e-06	chr22	21922456	20.2642	25137.4	0.0190519	rs2266959	0.18297	UC	chr22:21922456-21922456	1	FALSE
OCR_101345	chr22	21921533	21922765	YDJC	ENSG00000161179.9	HiC_0hr_4kb:HiC_8hr_4kb:HiC_24hr_4kb	rs140490	1.25e-14	chr22	21921686	59.4569	8.14533e+12	0.00550706	rs2266959	0.947566	IBD	chr22:21921686-21921686	3	FALSE
OCR_101345	chr22	21921533	21922765	YDJC	ENSG00000161179.9	HiC_0hr_4kb:HiC_8hr_4kb:HiC_24hr_4kb	rs140490	1.8e-05	chr22	21921686	18.39	9847.78	0.0076749	rs11089637	0.771916	RA	chr22:21921686-21921686	3	FALSE
OCR_101345	chr22	21921533	21922765	YDJC	ENSG00000161179.9	HiC_0hr_4kb:HiC_8hr_4kb:HiC_24hr_4kb	rs140490	8.35415e-10	chr22	21921686	37.6756	1.51761e+08	0.00860487	rs131658	0.751014	SLE	chr22:21921686-21921686	3	FALSE
OCR_101345	chr22	21921533	21922765	YDJC	ENSG00000161179.9	HiC_0hr_4kb:HiC_8hr_4kb:HiC_24hr_4kb	rs140490	1.014e-05	chr22	21921686	19.4849	17024.9	0.0129033	rs2266959	0.570974	UC	chr22:21921686-21921686	3	FALSE
OCR_101345	chr22	21921533	21922765	YDJC	ENSG00000161179.9	HiC_0hr_4kb:HiC_8hr_4kb:HiC_24hr_4kb	rs140491	6.157e-15	chr22	21922364	60.8508	1.63521e+13	0.0110556	rs2266959	0.763408	IBD	chr22:21922364-21922364	3	FALSE
OCR_101345	chr22	21921533	21922765	YDJC	ENSG00000161179.9	HiC_0hr_4kb:HiC_8hr_4kb:HiC_24hr_4kb	rs140491	2e-05	chr22	21922364	18.1893	8907.48	0.00694208	rs11089637	0.934055	RA	chr22:21922364-21922364	3	FALSE
OCR_101345	chr22	21921533	21922765	YDJC	ENSG00000161179.9	HiC_0hr_4kb:HiC_8hr_4kb:HiC_24hr_4kb	rs140491	5.49146e-10	chr22	21922364	38.4943	2.2852e+08	0.0129571	rs131658	0.398107	SLE	chr22:21922364-21922364	3	FALSE
OCR_101345	chr22	21921533	21922765	YDJC	ENSG00000161179.9	HiC_0hr_4kb:HiC_8hr_4kb:HiC_24hr_4kb	rs140491	6.787e-06	chr22	21922364	20.2524	24988.6	0.0189391	rs2266959	0.220916	UC	chr22:21922364-21922364	3	FALSE
OCR_101345	chr22	21921533	21922765	YDJC	ENSG00000161179.9	HiC_0hr_4kb:HiC_8hr_4kb:HiC_24hr_4kb	rs11089620	3.094e-15	chr22	21922456	62.2056	3.21947e+13	0.00647752	rs2266959	0.903349	CRO	chr22:21922456-21922456	3	FALSE
OCR_101345	chr22	21921533	21922765	YDJC	ENSG00000161179.9	HiC_0hr_4kb:HiC_8hr_4kb:HiC_24hr_4kb	rs11089620	3.73e-15	chr22	21922456	61.8375	2.67822e+13	0.0181074	rs2266959	0.374736	IBD	chr22:21922456-21922456	3	FALSE
OCR_101345	chr22	21921533	21922765	YDJC	ENSG00000161179.9	HiC_0hr_4kb:HiC_8hr_4kb:HiC_24hr_4kb	rs11089620	7.7e-06	chr22	21922456	20.0109	22147.4	0.0172606	rs11089637	0.127355	RA	chr22:21922456-21922456	3	FALSE
OCR_101345	chr22	21921533	21922765	YDJC	ENSG00000161179.9	HiC_0hr_4kb:HiC_8hr_4kb:HiC_24hr_4kb	rs11089620	1.71348e-09	chr22	21922456	36.275	7.53383e+07	0.00427169	rs131658	0.91297	SLE	chr22:21922456-21922456	3	FALSE
OCR_101345	chr22	21921533	21922765	YDJC	ENSG00000161179.9	HiC_0hr_4kb:HiC_8hr_4kb:HiC_24hr_4kb	rs11089620	6.745e-06	chr22	21922456	20.2642	25137.4	0.0190519	rs2266959	0.18297	UC	chr22:21922456-21922456	3	FALSE
OCR_101347	chr22	21983256	21984575	KB-1440D3.14	ENSG00000273342.1	HiC_0hr_4kb:HiC_8hr_4kb	rs2298429	2.14041e-07	chr22	21983260	26.902	694525	0.0175886	rs2283790	0.95472	AS	chr22:21983260-21983260	not_differential	FALSE
OCR_101347	chr22	21983256	21984575	KB-1440D3.14	ENSG00000273342.1	HiC_0hr_4kb:HiC_8hr_4kb	rs2298429	0.009827	chr22	21983260	6.66599	28.0222	0.0109555	rs2266959	0.942215	JIA	chr22:21983260-21983260	not_differential	FALSE
OCR_101347	chr22	21983256	21984575	KB-1440D3.14	ENSG00000273342.1	HiC_0hr_4kb:HiC_8hr_4kb	rs2298429	0.383931	chr22	21983260	0.758077	1.46088	0.00543439	rs4821124	0.687145	PSO	chr22:21983260-21983260	not_differential	FALSE
OCR_101347	chr22	21983256	21984575	KB-1440D3.14	ENSG00000273342.1	HiC_0hr_4kb:HiC_8hr_4kb	rs2298429	5.75714e-10	chr22	21983260	38.4021	2.18224e+08	0.0123733	rs131658	0.4613	SLE	chr22:21983260-21983260	not_differential	FALSE
OCR_101347	chr22	21983256	21984575	KB-1440D3.14	ENSG00000273342.1	HiC_0hr_4kb:HiC_8hr_4kb	rs2298429	1.398e-05	chr22	21983260	18.8719	12530.6	0.00949706	rs2266959	0.788278	UC	chr22:21983260-21983260	not_differential	FALSE
OCR_101347	chr22	21983256	21984575	KB-1440D3.14	ENSG00000273342.1	HiC_0hr_4kb:HiC_8hr_4kb	rs710177	0.631388	chr22	21984205	0.230183	1.12198	0.00417369	rs4821124	0.789723	PSO	chr22:21984205-21984205	not_differential	FALSE
OCR_101347	chr22	21983256	21984575	KB-1440D3.14	ENSG00000273342.1	HiC_0hr_4kb:HiC_8hr_4kb	rs710177	1.3e-05	chr22	21984205	19.0105	13430.2	0.0104668	rs11089637	0.480471	RA	chr22:21984205-21984205	not_differential	FALSE
OCR_101347	chr22	21983256	21984575	KB-1440D3.14	ENSG00000273342.1	HiC_0hr_4kb:HiC_8hr_4kb	rs11704601	0.225007	chr22	21984568	1.47215	2.08773	0.00776623	rs4821124	0.492066	PSO	chr22:21984568-21984568	not_differential	FALSE
OCR_101347	chr22	21983256	21984575	MIR130B	ENSG00000207751.1	HiC_0hr_4kb	rs2298429	2.14041e-07	chr22	21983260	26.902	694525	0.0175886	rs2283790	0.95472	AS	chr22:21983260-21983260	not_differential	FALSE
OCR_101347	chr22	21983256	21984575	MIR130B	ENSG00000207751.1	HiC_0hr_4kb	rs2298429	0.009827	chr22	21983260	6.66599	28.0222	0.0109555	rs2266959	0.942215	JIA	chr22:21983260-21983260	not_differential	FALSE
OCR_101347	chr22	21983256	21984575	MIR130B	ENSG00000207751.1	HiC_0hr_4kb	rs2298429	0.383931	chr22	21983260	0.758077	1.46088	0.00543439	rs4821124	0.687145	PSO	chr22:21983260-21983260	not_differential	FALSE
OCR_101347	chr22	21983256	21984575	MIR130B	ENSG00000207751.1	HiC_0hr_4kb	rs2298429	5.75714e-10	chr22	21983260	38.4021	2.18224e+08	0.0123733	rs131658	0.4613	SLE	chr22:21983260-21983260	not_differential	FALSE
OCR_101347	chr22	21983256	21984575	MIR130B	ENSG00000207751.1	HiC_0hr_4kb	rs2298429	1.398e-05	chr22	21983260	18.8719	12530.6	0.00949706	rs2266959	0.788278	UC	chr22:21983260-21983260	not_differential	FALSE
OCR_101347	chr22	21983256	21984575	MIR130B	ENSG00000207751.1	HiC_0hr_4kb	rs710177	0.631388	chr22	21984205	0.230183	1.12198	0.00417369	rs4821124	0.789723	PSO	chr22:21984205-21984205	not_differential	FALSE
OCR_101347	chr22	21983256	21984575	MIR130B	ENSG00000207751.1	HiC_0hr_4kb	rs710177	1.3e-05	chr22	21984205	19.0105	13430.2	0.0104668	rs11089637	0.480471	RA	chr22:21984205-21984205	not_differential	FALSE
OCR_101347	chr22	21983256	21984575	MIR130B	ENSG00000207751.1	HiC_0hr_4kb	rs11704601	0.225007	chr22	21984568	1.47215	2.08773	0.00776623	rs4821124	0.492066	PSO	chr22:21984568-21984568	not_differential	FALSE
OCR_101347	chr22	21983256	21984575	RANBP1	ENSG00000099901.12	HiC_8hr_4kb	rs2298429	2.14041e-07	chr22	21983260	26.902	694525	0.0175886	rs2283790	0.95472	AS	chr22:21983260-21983260	3	FALSE
OCR_101347	chr22	21983256	21984575	RANBP1	ENSG00000099901.12	HiC_8hr_4kb	rs2298429	0.009827	chr22	21983260	6.66599	28.0222	0.0109555	rs2266959	0.942215	JIA	chr22:21983260-21983260	3	FALSE
OCR_101347	chr22	21983256	21984575	RANBP1	ENSG00000099901.12	HiC_8hr_4kb	rs2298429	0.383931	chr22	21983260	0.758077	1.46088	0.00543439	rs4821124	0.687145	PSO	chr22:21983260-21983260	3	FALSE
OCR_101347	chr22	21983256	21984575	RANBP1	ENSG00000099901.12	HiC_8hr_4kb	rs2298429	5.75714e-10	chr22	21983260	38.4021	2.18224e+08	0.0123733	rs131658	0.4613	SLE	chr22:21983260-21983260	3	FALSE
OCR_101347	chr22	21983256	21984575	RANBP1	ENSG00000099901.12	HiC_8hr_4kb	rs2298429	1.398e-05	chr22	21983260	18.8719	12530.6	0.00949706	rs2266959	0.788278	UC	chr22:21983260-21983260	3	FALSE
OCR_101347	chr22	21983256	21984575	RANBP1	ENSG00000099901.12	HiC_8hr_4kb	rs710177	0.631388	chr22	21984205	0.230183	1.12198	0.00417369	rs4821124	0.789723	PSO	chr22:21984205-21984205	3	FALSE
OCR_101347	chr22	21983256	21984575	RANBP1	ENSG00000099901.12	HiC_8hr_4kb	rs710177	1.3e-05	chr22	21984205	19.0105	13430.2	0.0104668	rs11089637	0.480471	RA	chr22:21984205-21984205	3	FALSE
OCR_101347	chr22	21983256	21984575	RANBP1	ENSG00000099901.12	HiC_8hr_4kb	rs11704601	0.225007	chr22	21984568	1.47215	2.08773	0.00776623	rs4821124	0.492066	PSO	chr22:21984568-21984568	3	FALSE
OCR_101347	chr22	21983256	21984575	SDF2L1	ENSG00000128228.4	HiC_0hr_4kb:HiC_8hr_4kb	rs2298429	2.14041e-07	chr22	21983260	26.902	694525	0.0175886	rs2283790	0.95472	AS	chr22:21983260-21983260	1	FALSE
OCR_101347	chr22	21983256	21984575	SDF2L1	ENSG00000128228.4	HiC_0hr_4kb:HiC_8hr_4kb	rs2298429	0.009827	chr22	21983260	6.66599	28.0222	0.0109555	rs2266959	0.942215	JIA	chr22:21983260-21983260	1	FALSE
OCR_101347	chr22	21983256	21984575	SDF2L1	ENSG00000128228.4	HiC_0hr_4kb:HiC_8hr_4kb	rs2298429	0.383931	chr22	21983260	0.758077	1.46088	0.00543439	rs4821124	0.687145	PSO	chr22:21983260-21983260	1	FALSE
OCR_101347	chr22	21983256	21984575	SDF2L1	ENSG00000128228.4	HiC_0hr_4kb:HiC_8hr_4kb	rs2298429	5.75714e-10	chr22	21983260	38.4021	2.18224e+08	0.0123733	rs131658	0.4613	SLE	chr22:21983260-21983260	1	FALSE
OCR_101347	chr22	21983256	21984575	SDF2L1	ENSG00000128228.4	HiC_0hr_4kb:HiC_8hr_4kb	rs2298429	1.398e-05	chr22	21983260	18.8719	12530.6	0.00949706	rs2266959	0.788278	UC	chr22:21983260-21983260	1	FALSE
OCR_101347	chr22	21983256	21984575	SDF2L1	ENSG00000128228.4	HiC_0hr_4kb:HiC_8hr_4kb	rs710177	0.631388	chr22	21984205	0.230183	1.12198	0.00417369	rs4821124	0.789723	PSO	chr22:21984205-21984205	1	FALSE
OCR_101347	chr22	21983256	21984575	SDF2L1	ENSG00000128228.4	HiC_0hr_4kb:HiC_8hr_4kb	rs710177	1.3e-05	chr22	21984205	19.0105	13430.2	0.0104668	rs11089637	0.480471	RA	chr22:21984205-21984205	1	FALSE
OCR_101347	chr22	21983256	21984575	SDF2L1	ENSG00000128228.4	HiC_0hr_4kb:HiC_8hr_4kb	rs11704601	0.225007	chr22	21984568	1.47215	2.08773	0.00776623	rs4821124	0.492066	PSO	chr22:21984568-21984568	1	FALSE
OCR_101347	chr22	21983256	21984575	THAP7	ENSG00000184436.7	HiC_0hr_4kb	rs2298429	2.14041e-07	chr22	21983260	26.902	694525	0.0175886	rs2283790	0.95472	AS	chr22:21983260-21983260	not_differential	FALSE
OCR_101347	chr22	21983256	21984575	THAP7	ENSG00000184436.7	HiC_0hr_4kb	rs2298429	0.009827	chr22	21983260	6.66599	28.0222	0.0109555	rs2266959	0.942215	JIA	chr22:21983260-21983260	not_differential	FALSE
OCR_101347	chr22	21983256	21984575	THAP7	ENSG00000184436.7	HiC_0hr_4kb	rs2298429	0.383931	chr22	21983260	0.758077	1.46088	0.00543439	rs4821124	0.687145	PSO	chr22:21983260-21983260	not_differential	FALSE
OCR_101347	chr22	21983256	21984575	THAP7	ENSG00000184436.7	HiC_0hr_4kb	rs2298429	5.75714e-10	chr22	21983260	38.4021	2.18224e+08	0.0123733	rs131658	0.4613	SLE	chr22:21983260-21983260	not_differential	FALSE
OCR_101347	chr22	21983256	21984575	THAP7	ENSG00000184436.7	HiC_0hr_4kb	rs2298429	1.398e-05	chr22	21983260	18.8719	12530.6	0.00949706	rs2266959	0.788278	UC	chr22:21983260-21983260	not_differential	FALSE
OCR_101347	chr22	21983256	21984575	THAP7	ENSG00000184436.7	HiC_0hr_4kb	rs710177	0.631388	chr22	21984205	0.230183	1.12198	0.00417369	rs4821124	0.789723	PSO	chr22:21984205-21984205	not_differential	FALSE
OCR_101347	chr22	21983256	21984575	THAP7	ENSG00000184436.7	HiC_0hr_4kb	rs710177	1.3e-05	chr22	21984205	19.0105	13430.2	0.0104668	rs11089637	0.480471	RA	chr22:21984205-21984205	not_differential	FALSE
OCR_101347	chr22	21983256	21984575	THAP7	ENSG00000184436.7	HiC_0hr_4kb	rs11704601	0.225007	chr22	21984568	1.47215	2.08773	0.00776623	rs4821124	0.492066	PSO	chr22:21984568-21984568	not_differential	FALSE
OCR_101347	chr22	21983256	21984575	THAP7-AS1	ENSG00000230513.1	HiC_0hr_4kb	rs2298429	2.14041e-07	chr22	21983260	26.902	694525	0.0175886	rs2283790	0.95472	AS	chr22:21983260-21983260	not_differential	FALSE
OCR_101347	chr22	21983256	21984575	THAP7-AS1	ENSG00000230513.1	HiC_0hr_4kb	rs2298429	0.009827	chr22	21983260	6.66599	28.0222	0.0109555	rs2266959	0.942215	JIA	chr22:21983260-21983260	not_differential	FALSE
OCR_101347	chr22	21983256	21984575	THAP7-AS1	ENSG00000230513.1	HiC_0hr_4kb	rs2298429	0.383931	chr22	21983260	0.758077	1.46088	0.00543439	rs4821124	0.687145	PSO	chr22:21983260-21983260	not_differential	FALSE
OCR_101347	chr22	21983256	21984575	THAP7-AS1	ENSG00000230513.1	HiC_0hr_4kb	rs2298429	5.75714e-10	chr22	21983260	38.4021	2.18224e+08	0.0123733	rs131658	0.4613	SLE	chr22:21983260-21983260	not_differential	FALSE
OCR_101347	chr22	21983256	21984575	THAP7-AS1	ENSG00000230513.1	HiC_0hr_4kb	rs2298429	1.398e-05	chr22	21983260	18.8719	12530.6	0.00949706	rs2266959	0.788278	UC	chr22:21983260-21983260	not_differential	FALSE
OCR_101347	chr22	21983256	21984575	THAP7-AS1	ENSG00000230513.1	HiC_0hr_4kb	rs710177	0.631388	chr22	21984205	0.230183	1.12198	0.00417369	rs4821124	0.789723	PSO	chr22:21984205-21984205	not_differential	FALSE
OCR_101347	chr22	21983256	21984575	THAP7-AS1	ENSG00000230513.1	HiC_0hr_4kb	rs710177	1.3e-05	chr22	21984205	19.0105	13430.2	0.0104668	rs11089637	0.480471	RA	chr22:21984205-21984205	not_differential	FALSE
OCR_101347	chr22	21983256	21984575	THAP7-AS1	ENSG00000230513.1	HiC_0hr_4kb	rs11704601	0.225007	chr22	21984568	1.47215	2.08773	0.00776623	rs4821124	0.492066	PSO	chr22:21984568-21984568	not_differential	FALSE
OCR_101347	chr22	21983256	21984575	TRMT2A	ENSG00000099899.10	HiC_8hr_4kb	rs2298429	2.14041e-07	chr22	21983260	26.902	694525	0.0175886	rs2283790	0.95472	AS	chr22:21983260-21983260	3	FALSE
OCR_101347	chr22	21983256	21984575	TRMT2A	ENSG00000099899.10	HiC_8hr_4kb	rs2298429	0.009827	chr22	21983260	6.66599	28.0222	0.0109555	rs2266959	0.942215	JIA	chr22:21983260-21983260	3	FALSE
OCR_101347	chr22	21983256	21984575	TRMT2A	ENSG00000099899.10	HiC_8hr_4kb	rs2298429	0.383931	chr22	21983260	0.758077	1.46088	0.00543439	rs4821124	0.687145	PSO	chr22:21983260-21983260	3	FALSE
OCR_101347	chr22	21983256	21984575	TRMT2A	ENSG00000099899.10	HiC_8hr_4kb	rs2298429	5.75714e-10	chr22	21983260	38.4021	2.18224e+08	0.0123733	rs131658	0.4613	SLE	chr22:21983260-21983260	3	FALSE
OCR_101347	chr22	21983256	21984575	TRMT2A	ENSG00000099899.10	HiC_8hr_4kb	rs2298429	1.398e-05	chr22	21983260	18.8719	12530.6	0.00949706	rs2266959	0.788278	UC	chr22:21983260-21983260	3	FALSE
OCR_101347	chr22	21983256	21984575	TRMT2A	ENSG00000099899.10	HiC_8hr_4kb	rs710177	0.631388	chr22	21984205	0.230183	1.12198	0.00417369	rs4821124	0.789723	PSO	chr22:21984205-21984205	3	FALSE
OCR_101347	chr22	21983256	21984575	TRMT2A	ENSG00000099899.10	HiC_8hr_4kb	rs710177	1.3e-05	chr22	21984205	19.0105	13430.2	0.0104668	rs11089637	0.480471	RA	chr22:21984205-21984205	3	FALSE
OCR_101347	chr22	21983256	21984575	TRMT2A	ENSG00000099899.10	HiC_8hr_4kb	rs11704601	0.225007	chr22	21984568	1.47215	2.08773	0.00776623	rs4821124	0.492066	PSO	chr22:21984568-21984568	3	FALSE
OCR_101347	chr22	21983256	21984575	UBE2L3	ENSG00000185651.10	HiC_0hr_4kb:HiC_8hr_4kb:HiC_24hr_4kb	rs2298429	2.14041e-07	chr22	21983260	26.902	694525	0.0175886	rs2283790	0.95472	AS	chr22:21983260-21983260	3	FALSE
OCR_101347	chr22	21983256	21984575	UBE2L3	ENSG00000185651.10	HiC_0hr_4kb:HiC_8hr_4kb:HiC_24hr_4kb	rs2298429	0.009827	chr22	21983260	6.66599	28.0222	0.0109555	rs2266959	0.942215	JIA	chr22:21983260-21983260	3	FALSE
OCR_101347	chr22	21983256	21984575	UBE2L3	ENSG00000185651.10	HiC_0hr_4kb:HiC_8hr_4kb:HiC_24hr_4kb	rs2298429	0.383931	chr22	21983260	0.758077	1.46088	0.00543439	rs4821124	0.687145	PSO	chr22:21983260-21983260	3	FALSE
OCR_101347	chr22	21983256	21984575	UBE2L3	ENSG00000185651.10	HiC_0hr_4kb:HiC_8hr_4kb:HiC_24hr_4kb	rs2298429	5.75714e-10	chr22	21983260	38.4021	2.18224e+08	0.0123733	rs131658	0.4613	SLE	chr22:21983260-21983260	3	FALSE
OCR_101347	chr22	21983256	21984575	UBE2L3	ENSG00000185651.10	HiC_0hr_4kb:HiC_8hr_4kb:HiC_24hr_4kb	rs2298429	1.398e-05	chr22	21983260	18.8719	12530.6	0.00949706	rs2266959	0.788278	UC	chr22:21983260-21983260	3	FALSE
OCR_101347	chr22	21983256	21984575	UBE2L3	ENSG00000185651.10	HiC_0hr_4kb:HiC_8hr_4kb:HiC_24hr_4kb	rs710177	0.631388	chr22	21984205	0.230183	1.12198	0.00417369	rs4821124	0.789723	PSO	chr22:21984205-21984205	3	FALSE
OCR_101347	chr22	21983256	21984575	UBE2L3	ENSG00000185651.10	HiC_0hr_4kb:HiC_8hr_4kb:HiC_24hr_4kb	rs710177	1.3e-05	chr22	21984205	19.0105	13430.2	0.0104668	rs11089637	0.480471	RA	chr22:21984205-21984205	3	FALSE
OCR_101347	chr22	21983256	21984575	UBE2L3	ENSG00000185651.10	HiC_0hr_4kb:HiC_8hr_4kb:HiC_24hr_4kb	rs11704601	0.225007	chr22	21984568	1.47215	2.08773	0.00776623	rs4821124	0.492066	PSO	chr22:21984568-21984568	3	FALSE
OCR_101348	chr22	21996215	21997096	CCDC116	ENSG00000161180.6	HiC_0hr_4kb:HiC_8hr_4kb	rs13054355	0.61773	chr22	21997070	0.24907	1.13262	0.00421329	rs4821124	0.78555	PSO	chr22:21997070-21997070	not_differential	FALSE
OCR_101348	chr22	21996215	21997096	HIC2	ENSG00000169635.5	HiC_8hr_4kb	rs13054355	0.61773	chr22	21997070	0.24907	1.13262	0.00421329	rs4821124	0.78555	PSO	chr22:21997070-21997070	not_differential	FALSE
OCR_101348	chr22	21996215	21997096	MIR130B	ENSG00000207751.1	HiC_0hr_4kb:HiC_8hr_4kb	rs13054355	0.61773	chr22	21997070	0.24907	1.13262	0.00421329	rs4821124	0.78555	PSO	chr22:21997070-21997070	not_differential	FALSE
OCR_101348	chr22	21996215	21997096	UBE2L3	ENSG00000185651.10	HiC_0hr_4kb:HiC_8hr_4kb:HiC_24hr_4kb	rs13054355	0.61773	chr22	21997070	0.24907	1.13262	0.00421329	rs4821124	0.78555	PSO	chr22:21997070-21997070	3	FALSE
OCR_101348	chr22	21996215	21997096	YDJC	ENSG00000161179.9	HiC_0hr_4kb:HiC_8hr_4kb	rs13054355	0.61773	chr22	21997070	0.24907	1.13262	0.00421329	rs4821124	0.78555	PSO	chr22:21997070-21997070	3	FALSE
OCR_101349	chr22	21997161	21997598	CCDC116	ENSG00000161180.6	HiC_0hr_4kb:HiC_8hr_4kb	rs5998835	0.982372	chr22	21997574	0.000488184	1.00024	0.00372086	rs4821124	0.9442	PSO	chr22:21997574-21997574	not_differential	FALSE
OCR_101349	chr22	21997161	21997598	CCDC116	ENSG00000161180.6	HiC_0hr_4kb:HiC_8hr_4kb	rs398101684	1.087e-05	chr22	21997591	19.3521	15931.4	0.0120746	rs2266959	0.60751	UC	chr22:21997591-21997591	not_differential	FALSE
OCR_101349	chr22	21997161	21997598	HIC2	ENSG00000169635.5	HiC_8hr_4kb	rs5998835	0.982372	chr22	21997574	0.000488184	1.00024	0.00372086	rs4821124	0.9442	PSO	chr22:21997574-21997574	not_differential	FALSE
OCR_101349	chr22	21997161	21997598	HIC2	ENSG00000169635.5	HiC_8hr_4kb	rs398101684	1.087e-05	chr22	21997591	19.3521	15931.4	0.0120746	rs2266959	0.60751	UC	chr22:21997591-21997591	not_differential	FALSE
OCR_101349	chr22	21997161	21997598	MIR130B	ENSG00000207751.1	HiC_0hr_4kb:HiC_8hr_4kb	rs5998835	0.982372	chr22	21997574	0.000488184	1.00024	0.00372086	rs4821124	0.9442	PSO	chr22:21997574-21997574	not_differential	FALSE
OCR_101349	chr22	21997161	21997598	MIR130B	ENSG00000207751.1	HiC_0hr_4kb:HiC_8hr_4kb	rs398101684	1.087e-05	chr22	21997591	19.3521	15931.4	0.0120746	rs2266959	0.60751	UC	chr22:21997591-21997591	not_differential	FALSE
OCR_101349	chr22	21997161	21997598	UBE2L3	ENSG00000185651.10	HiC_0hr_4kb:HiC_8hr_4kb:HiC_24hr_4kb	rs5998835	0.982372	chr22	21997574	0.000488184	1.00024	0.00372086	rs4821124	0.9442	PSO	chr22:21997574-21997574	3	FALSE
OCR_101349	chr22	21997161	21997598	UBE2L3	ENSG00000185651.10	HiC_0hr_4kb:HiC_8hr_4kb:HiC_24hr_4kb	rs398101684	1.087e-05	chr22	21997591	19.3521	15931.4	0.0120746	rs2266959	0.60751	UC	chr22:21997591-21997591	3	FALSE
OCR_101349	chr22	21997161	21997598	YDJC	ENSG00000161179.9	HiC_0hr_4kb:HiC_8hr_4kb	rs5998835	0.982372	chr22	21997574	0.000488184	1.00024	0.00372086	rs4821124	0.9442	PSO	chr22:21997574-21997574	3	FALSE
OCR_101349	chr22	21997161	21997598	YDJC	ENSG00000161179.9	HiC_0hr_4kb:HiC_8hr_4kb	rs398101684	1.087e-05	chr22	21997591	19.3521	15931.4	0.0120746	rs2266959	0.60751	UC	chr22:21997591-21997591	3	FALSE
OCR_101350	chr22	22005650	22006913	KB-1440D3.13	ENSG00000272954.1	HiC_0hr_4kb:HiC_8hr_4kb	rs374659	0.35045	chr22	22005687	0.871828	1.54638	0.00575244	rs4821124	0.659769	PSO	chr22:22005687-22005687	not_differential	FALSE
OCR_101350	chr22	22005650	22006913	KB-1440D3.13	ENSG00000272954.1	HiC_0hr_4kb:HiC_8hr_4kb	rs412596	0.346066	chr22	22005719	0.887831	1.5588	0.00579865	rs4821124	0.654017	PSO	chr22:22005719-22005719	not_differential	FALSE
OCR_101350	chr22	22005650	22006913	KB-1440D3.13	ENSG00000272954.1	HiC_0hr_4kb:HiC_8hr_4kb	rs12628594	0.46562	chr22	22005879	0.532351	1.30496	0.0048544	rs4821124	0.717673	PSO	chr22:22005879-22005879	not_differential	FALSE
OCR_101350	chr22	22005650	22006913	KB-1440D3.13	ENSG00000272954.1	HiC_0hr_4kb:HiC_8hr_4kb	rs402548	0.650972	chr22	22006008	0.204677	1.10776	0.0041208	rs4821124	0.802144	PSO	chr22:22006008-22006008	not_differential	FALSE
OCR_101350	chr22	22005650	22006913	KB-1440D3.13	ENSG00000272954.1	HiC_0hr_4kb:HiC_8hr_4kb	rs861844	0.428318	chr22	22006219	0.62738	1.36847	0.00509062	rs4821124	0.702905	PSO	chr22:22006219-22006219	not_differential	FALSE
OCR_101350	chr22	22005650	22006913	PPIL2	ENSG00000100023.13	HiC_0hr_4kb:HiC_8hr_4kb	rs374659	0.35045	chr22	22005687	0.871828	1.54638	0.00575244	rs4821124	0.659769	PSO	chr22:22005687-22005687	not_differential	FALSE
OCR_101350	chr22	22005650	22006913	PPIL2	ENSG00000100023.13	HiC_0hr_4kb:HiC_8hr_4kb	rs412596	0.346066	chr22	22005719	0.887831	1.5588	0.00579865	rs4821124	0.654017	PSO	chr22:22005719-22005719	not_differential	FALSE
OCR_101350	chr22	22005650	22006913	PPIL2	ENSG00000100023.13	HiC_0hr_4kb:HiC_8hr_4kb	rs12628594	0.46562	chr22	22005879	0.532351	1.30496	0.0048544	rs4821124	0.717673	PSO	chr22:22005879-22005879	not_differential	FALSE
OCR_101350	chr22	22005650	22006913	PPIL2	ENSG00000100023.13	HiC_0hr_4kb:HiC_8hr_4kb	rs402548	0.650972	chr22	22006008	0.204677	1.10776	0.0041208	rs4821124	0.802144	PSO	chr22:22006008-22006008	not_differential	FALSE
OCR_101350	chr22	22005650	22006913	PPIL2	ENSG00000100023.13	HiC_0hr_4kb:HiC_8hr_4kb	rs861844	0.428318	chr22	22006219	0.62738	1.36847	0.00509062	rs4821124	0.702905	PSO	chr22:22006219-22006219	not_differential	FALSE
OCR_101350	chr22	22005650	22006913	UBE2L3	ENSG00000185651.10	HiC_0hr_4kb	rs374659	0.35045	chr22	22005687	0.871828	1.54638	0.00575244	rs4821124	0.659769	PSO	chr22:22005687-22005687	3	FALSE
OCR_101350	chr22	22005650	22006913	UBE2L3	ENSG00000185651.10	HiC_0hr_4kb	rs412596	0.346066	chr22	22005719	0.887831	1.5588	0.00579865	rs4821124	0.654017	PSO	chr22:22005719-22005719	3	FALSE
OCR_101350	chr22	22005650	22006913	UBE2L3	ENSG00000185651.10	HiC_0hr_4kb	rs12628594	0.46562	chr22	22005879	0.532351	1.30496	0.0048544	rs4821124	0.717673	PSO	chr22:22005879-22005879	3	FALSE
OCR_101350	chr22	22005650	22006913	UBE2L3	ENSG00000185651.10	HiC_0hr_4kb	rs402548	0.650972	chr22	22006008	0.204677	1.10776	0.0041208	rs4821124	0.802144	PSO	chr22:22006008-22006008	3	FALSE
OCR_101350	chr22	22005650	22006913	UBE2L3	ENSG00000185651.10	HiC_0hr_4kb	rs861844	0.428318	chr22	22006219	0.62738	1.36847	0.00509062	rs4821124	0.702905	PSO	chr22:22006219-22006219	3	FALSE
OCR_101351	chr22	22011522	22012743	CCDC116	ENSG00000161180.6	HiC_0hr_4kb	rs1052514	0.0377789	chr22	22012595	4.31495	8.64927	0.0321748	rs4821124	0.0683135	PSO	chr22:22012595-22012595	not_differential	FALSE
OCR_101351	chr22	22011522	22012743	MIR130B	ENSG00000207751.1	HiC_8hr_2kb	rs1052514	0.0377789	chr22	22012595	4.31495	8.64927	0.0321748	rs4821124	0.0683135	PSO	chr22:22012595-22012595	not_differential	FALSE
OCR_101351	chr22	22011522	22012743	MIR301B	ENSG00000212102.1	HiC_0hr_2kb:HiC_8hr_2kb	rs1052514	0.0377789	chr22	22012595	4.31495	8.64927	0.0321748	rs4821124	0.0683135	PSO	chr22:22012595-22012595	not_differential	FALSE
OCR_101351	chr22	22011522	22012743	PPIL2	ENSG00000100023.13	HiC_0hr_2kb:HiC_8hr_2kb:HiC_8hr_4kb	rs1052514	0.0377789	chr22	22012595	4.31495	8.64927	0.0321748	rs4821124	0.0683135	PSO	chr22:22012595-22012595	not_differential	FALSE
OCR_101351	chr22	22011522	22012743	SDF2L1	ENSG00000128228.4	HiC_0hr_4kb:HiC_8hr_4kb	rs1052514	0.0377789	chr22	22012595	4.31495	8.64927	0.0321748	rs4821124	0.0683135	PSO	chr22:22012595-22012595	1	FALSE
OCR_101351	chr22	22011522	22012743	YDJC	ENSG00000161179.9	HiC_0hr_4kb	rs1052514	0.0377789	chr22	22012595	4.31495	8.64927	0.0321748	rs4821124	0.0683135	PSO	chr22:22012595-22012595	3	FALSE
OCR_101352	chr22	22019968	22021037	MIR130B	ENSG00000207751.1	HiC_0hr_4kb:HiC_8hr_4kb	rs8137775	0.818823	chr22	22020100	0.0524682	1.02658	0.00381883	rs4821124	0.872757	PSO	chr22:22020100-22020100	not_differential	FALSE
OCR_101352	chr22	22019968	22021037	MIR130B	ENSG00000207751.1	HiC_0hr_4kb:HiC_8hr_4kb	rs388371	0.745147	chr22	22020694	0.105654	1.05425	0.00392174	rs4821124	0.838211	PSO	chr22:22020694-22020694	not_differential	FALSE
OCR_101352	chr22	22019968	22021037	MIR301B	ENSG00000212102.1	HiC_0hr_4kb:HiC_8hr_4kb	rs8137775	0.818823	chr22	22020100	0.0524682	1.02658	0.00381883	rs4821124	0.872757	PSO	chr22:22020100-22020100	not_differential	FALSE
OCR_101352	chr22	22019968	22021037	MIR301B	ENSG00000212102.1	HiC_0hr_4kb:HiC_8hr_4kb	rs388371	0.745147	chr22	22020694	0.105654	1.05425	0.00392174	rs4821124	0.838211	PSO	chr22:22020694-22020694	not_differential	FALSE
OCR_101352	chr22	22019968	22021037	PPIL2	ENSG00000100023.13	HiC_0hr_4kb:HiC_8hr_4kb	rs8137775	0.818823	chr22	22020100	0.0524682	1.02658	0.00381883	rs4821124	0.872757	PSO	chr22:22020100-22020100	not_differential	FALSE
OCR_101352	chr22	22019968	22021037	PPIL2	ENSG00000100023.13	HiC_0hr_4kb:HiC_8hr_4kb	rs388371	0.745147	chr22	22020694	0.105654	1.05425	0.00392174	rs4821124	0.838211	PSO	chr22:22020694-22020694	not_differential	FALSE
OCR_101726	chr22	30555153	30555455	LIF	ENSG00000128342.4	HiC_24hr_4kb	rs9625933	1.449e-05	chr22	30555216	18.8035	12109.6	0.00166566	rs5763767	0.938276	CRO	chr22:30555216-30555216	3	FALSE
OCR_101726	chr22	30555153	30555455	LIF	ENSG00000128342.4	HiC_24hr_4kb	rs9625933	9.044e-10	chr22	30555216	37.5209	1.4046e+08	0.0434698	rs5763767	0.289009	IBD	chr22:30555216-30555216	3	FALSE
OCR_101726	chr22	30555153	30555455	LIF	ENSG00000128342.4	HiC_24hr_4kb	rs9625933	1.101e-07	chr22	30555216	28.1877	1.32096e+06	0.0258726	rs5763767	0.714416	UC	chr22:30555216-30555216	3	FALSE
OCR_101726	chr22	30555153	30555455	RP1-102K2.8	ENSG00000268812.2	HiC_24hr_4kb	rs9625933	1.449e-05	chr22	30555216	18.8035	12109.6	0.00166566	rs5763767	0.938276	CRO	chr22:30555216-30555216	not_differential	FALSE
OCR_101726	chr22	30555153	30555455	RP1-102K2.8	ENSG00000268812.2	HiC_24hr_4kb	rs9625933	9.044e-10	chr22	30555216	37.5209	1.4046e+08	0.0434698	rs5763767	0.289009	IBD	chr22:30555216-30555216	not_differential	FALSE
OCR_101726	chr22	30555153	30555455	RP1-102K2.8	ENSG00000268812.2	HiC_24hr_4kb	rs9625933	1.101e-07	chr22	30555216	28.1877	1.32096e+06	0.0258726	rs5763767	0.714416	UC	chr22:30555216-30555216	not_differential	FALSE
OCR_101733	chr22	30592008	30593213	RP3-438O4.4	ENSG00000225676.1	HiC_24hr_4kb	rs713875	3.2e-07	chr22	30592487	26.1251	470966	0.0647807	rs5763767	0.318471	CRO	chr22:30592487-30592487	not_differential	FALSE
OCR_101733	chr22	30592008	30593213	RP3-438O4.4	ENSG00000225676.1	HiC_24hr_4kb	rs713875	5.39646e-12	chr22	30592487	47.5374	2.10191e+10	0.0226357	rs4820830	0.946399	T1D	chr22:30592487-30592487	not_differential	FALSE
OCR_101929	chr22	35653105	35654335	RP3-510H16.3	ENSG00000273176.1	HiC_0hr_4kb	rs5755674	2.83e-05	chr22	35653473	17.5287	6401.97	0.00317512	rs138788	0.924382	IBD	chr22:35653473-35653473	not_differential	FALSE
OCR_101929	chr22	35653105	35654335	RP3-510H16.3	ENSG00000273176.1	HiC_0hr_4kb	rs2235145	1.254e-05	chr22	35654133	19.0793	13899.8	0.00689375	rs138788	0.613893	IBD	chr22:35654133-35654133	not_differential	FALSE
OCR_101929	chr22	35653105	35654335	RP3-510H16.3	ENSG00000273176.1	HiC_0hr_4kb	rs2235145	6.662e-06	chr22	35654133	20.2879	25437	0.00272723	rs138788	0.900877	UC	chr22:35654133-35654133	not_differential	FALSE
OCR_101929	chr22	35653105	35654335	TOM1	ENSG00000100284.16	HiC_0hr_4kb	rs5755674	2.83e-05	chr22	35653473	17.5287	6401.97	0.00317512	rs138788	0.924382	IBD	chr22:35653473-35653473	not_differential	FALSE
OCR_101929	chr22	35653105	35654335	TOM1	ENSG00000100284.16	HiC_0hr_4kb	rs2235145	1.254e-05	chr22	35654133	19.0793	13899.8	0.00689375	rs138788	0.613893	IBD	chr22:35654133-35654133	not_differential	FALSE
OCR_101929	chr22	35653105	35654335	TOM1	ENSG00000100284.16	HiC_0hr_4kb	rs2235145	6.662e-06	chr22	35654133	20.2879	25437	0.00272723	rs138788	0.900877	UC	chr22:35654133-35654133	not_differential	FALSE
OCR_101932	chr22	35695180	35696482	HMGXB4	ENSG00000100281.9	HiC_0hr_4kb	rs4461	9.825e-06	chr22	35695802	19.5451	17545.9	0.00870203	rs138788	0.423961	IBD	chr22:35695802-35695802	3	FALSE
OCR_101932	chr22	35695180	35696482	HMGXB4	ENSG00000100281.9	HiC_0hr_4kb	rs4461	4.608e-06	chr22	35695802	20.9937	36201	0.0038813	rs138788	0.743002	UC	chr22:35695802-35695802	3	FALSE
OCR_10207	chr1	167411260	167411891	CD247	ENSG00000198821.6	HiC_0hr_2kb:HiC_0hr_4kb:HiC_8hr_1kb:HiC_8hr_2kb:HiC_8hr_4kb:HiC_24hr_2kb:HiC_24hr_4kb	rs864537	1.005e-07	chr1	167411384	28.3643	1.4429e+06	0.897829	rs864537	0.897829	CEL	chr1:167411384-167411384	4	FALSE
OCR_10207	chr1	167411260	167411891	CREG1	ENSG00000143162.7	HiC_0hr_4kb:HiC_8hr_4kb:HiC_24hr_4kb	rs864537	1.005e-07	chr1	167411384	28.3643	1.4429e+06	0.897829	rs864537	0.897829	CEL	chr1:167411384-167411384	not_differential	FALSE
OCR_10207	chr1	167411260	167411891	DUSP27	ENSG00000198842.5	HiC_0hr_4kb	rs864537	1.005e-07	chr1	167411384	28.3643	1.4429e+06	0.897829	rs864537	0.897829	CEL	chr1:167411384-167411384	not_differential	FALSE
OCR_10207	chr1	167411260	167411891	GPA33	ENSG00000143167.7	HiC_0hr_4kb:HiC_8hr_4kb	rs864537	1.005e-07	chr1	167411384	28.3643	1.4429e+06	0.897829	rs864537	0.897829	CEL	chr1:167411384-167411384	4	FALSE
OCR_10207	chr1	167411260	167411891	RP11-104L21.2	ENSG00000233411.1	HiC_0hr_4kb	rs864537	1.005e-07	chr1	167411384	28.3643	1.4429e+06	0.897829	rs864537	0.897829	CEL	chr1:167411384-167411384	4	FALSE
OCR_10207	chr1	167411260	167411891	RP11-104L21.3	ENSG00000273160.1	HiC_0hr_4kb	rs864537	1.005e-07	chr1	167411384	28.3643	1.4429e+06	0.897829	rs864537	0.897829	CEL	chr1:167411384-167411384	4	FALSE
OCR_102073	chr22	37491099	37491480	C1QTNF6	ENSG00000133466.9	HiC_0hr_4kb:HiC_8hr_4kb:HiC_24hr_4kb	rs2543511	0.018	chr22	37491140	5.59615	16.413	0.000528507	rs3218251	0.950269	RA	chr22:37491140-37491140	4	FALSE
OCR_102073	chr22	37491099	37491480	IL2RB	ENSG00000100385.9	HiC_0hr_4kb:HiC_8hr_4kb	rs2543511	0.018	chr22	37491140	5.59615	16.413	0.000528507	rs3218251	0.950269	RA	chr22:37491140-37491140	3	FALSE
OCR_102073	chr22	37491099	37491480	RP1-151B14.6	ENSG00000235237.1	HiC_8hr_4kb	rs2543511	0.018	chr22	37491140	5.59615	16.413	0.000528507	rs3218251	0.950269	RA	chr22:37491140-37491140	not_differential	FALSE
OCR_102073	chr22	37491099	37491480	RP5-1170K4.7	ENSG00000231467.2	HiC_8hr_4kb	rs2543511	0.018	chr22	37491140	5.59615	16.413	0.000528507	rs3218251	0.950269	RA	chr22:37491140-37491140	not_differential	FALSE
OCR_102073	chr22	37491099	37491480	TMPRSS6	ENSG00000187045.12	HiC_0hr_4kb:HiC_8hr_4kb:HiC_24hr_4kb	rs2543511	0.018	chr22	37491140	5.59615	16.413	0.000528507	rs3218251	0.950269	RA	chr22:37491140-37491140	not_differential	FALSE
OCR_102076	chr22	37517789	37518957	C1QTNF6	ENSG00000133466.9	HiC_0hr_4kb:HiC_8hr_4kb	rs16997734	0.7459	chr22	37518632	0.105009	1.05391	0.00115947	rs2284033	0.852968	JIA	chr22:37518632-37518632	4	FALSE
OCR_102076	chr22	37517789	37518957	IL2RB	ENSG00000100385.9	HiC_0hr_4kb:HiC_8hr_4kb	rs16997734	0.7459	chr22	37518632	0.105009	1.05391	0.00115947	rs2284033	0.852968	JIA	chr22:37518632-37518632	3	FALSE
OCR_102076	chr22	37517789	37518957	RAC2	ENSG00000128340.10	HiC_8hr_4kb	rs16997734	0.7459	chr22	37518632	0.105009	1.05391	0.00115947	rs2284033	0.852968	JIA	chr22:37518632-37518632	5	FALSE
OCR_102076	chr22	37517789	37518957	RP1-151B14.6	ENSG00000235237.1	HiC_0hr_4kb:HiC_8hr_4kb:HiC_24hr_4kb	rs16997734	0.7459	chr22	37518632	0.105009	1.05391	0.00115947	rs2284033	0.852968	JIA	chr22:37518632-37518632	not_differential	FALSE
OCR_102076	chr22	37517789	37518957	RP5-1170K4.7	ENSG00000231467.2	HiC_0hr_4kb:HiC_8hr_2kb:HiC_8hr_4kb:HiC_24hr_4kb	rs16997734	0.7459	chr22	37518632	0.105009	1.05391	0.00115947	rs2284033	0.852968	JIA	chr22:37518632-37518632	not_differential	FALSE
OCR_102076	chr22	37517789	37518957	TMPRSS6	ENSG00000187045.12	HiC_0hr_4kb	rs16997734	0.7459	chr22	37518632	0.105009	1.05391	0.00115947	rs2284033	0.852968	JIA	chr22:37518632-37518632	not_differential	FALSE
OCR_102077	chr22	37534021	37534665	IL2RB	ENSG00000100385.9	HiC_0hr_4kb:HiC_8hr_4kb	rs2284033	0.002633	chr22	37534034	9.04579	92.102	0.101327	rs2284033	0.540291	JIA	chr22:37534034-37534034	3	FALSE
OCR_102077	chr22	37534021	37534665	IL2RB	ENSG00000100385.9	HiC_0hr_4kb:HiC_8hr_4kb	rs2284033	0.011	chr22	37534034	6.46532	25.347	0.000816185	rs3218251	0.919502	RA	chr22:37534034-37534034	3	FALSE
OCR_102077	chr22	37534021	37534665	RP5-1170K4.7	ENSG00000231467.2	HiC_0hr_4kb:HiC_8hr_4kb:HiC_24hr_4kb	rs2284033	0.002633	chr22	37534034	9.04579	92.102	0.101327	rs2284033	0.540291	JIA	chr22:37534034-37534034	not_differential	FALSE
OCR_102077	chr22	37534021	37534665	RP5-1170K4.7	ENSG00000231467.2	HiC_0hr_4kb:HiC_8hr_4kb:HiC_24hr_4kb	rs2284033	0.011	chr22	37534034	6.46532	25.347	0.000816185	rs3218251	0.919502	RA	chr22:37534034-37534034	not_differential	FALSE
OCR_102077	chr22	37534021	37534665	TMPRSS6	ENSG00000187045.12	HiC_0hr_4kb:HiC_8hr_4kb	rs2284033	0.002633	chr22	37534034	9.04579	92.102	0.101327	rs2284033	0.540291	JIA	chr22:37534034-37534034	not_differential	FALSE
OCR_102077	chr22	37534021	37534665	TMPRSS6	ENSG00000187045.12	HiC_0hr_4kb:HiC_8hr_4kb	rs2284033	0.011	chr22	37534034	6.46532	25.347	0.000816185	rs3218251	0.919502	RA	chr22:37534034-37534034	not_differential	FALSE
OCR_102078	chr22	37535136	37535575	IL2RB	ENSG00000100385.9	HiC_0hr_4kb:HiC_8hr_4kb	rs2281094	0.02312	chr22	37535471	5.15947	13.1936	0.0145151	rs2284033	0.643424	JIA	chr22:37535471-37535471	3	FALSE
OCR_102078	chr22	37535136	37535575	RP5-1170K4.7	ENSG00000231467.2	HiC_0hr_4kb:HiC_8hr_4kb:HiC_24hr_4kb	rs2281094	0.02312	chr22	37535471	5.15947	13.1936	0.0145151	rs2284033	0.643424	JIA	chr22:37535471-37535471	not_differential	FALSE
OCR_102078	chr22	37535136	37535575	TMPRSS6	ENSG00000187045.12	HiC_0hr_4kb:HiC_8hr_4kb	rs2281094	0.02312	chr22	37535471	5.15947	13.1936	0.0145151	rs2284033	0.643424	JIA	chr22:37535471-37535471	not_differential	FALSE
OCR_102079	chr22	37544219	37544763	AL022314.1	ENSG00000252142.1	HiC_0hr_4kb:HiC_8hr_4kb	rs3218258	0.2129	chr22	37544245	1.5516	2.17232	0.0023899	rs2284033	0.730135	JIA	chr22:37544245-37544245	not_differential	FALSE
OCR_102079	chr22	37544219	37544763	AL022314.1	ENSG00000252142.1	HiC_0hr_4kb:HiC_8hr_4kb	rs3218258	6.8e-05	chr22	37544245	15.8657	2787.36	0.0897544	rs3218251	0.195828	RA	chr22:37544245-37544245	not_differential	FALSE
OCR_102079	chr22	37544219	37544763	AL022314.1	ENSG00000252142.1	HiC_0hr_4kb:HiC_8hr_4kb	rs228978	0.2173	chr22	37544345	1.52211	2.14054	0.00235493	rs2284033	0.73249	JIA	chr22:37544345-37544345	not_differential	FALSE
OCR_102079	chr22	37544219	37544763	AL022314.1	ENSG00000252142.1	HiC_0hr_4kb:HiC_8hr_4kb	rs228978	0.00011	chr22	37544345	14.9568	1769.42	0.0569763	rs3218251	0.484602	RA	chr22:37544345-37544345	not_differential	FALSE
OCR_102079	chr22	37544219	37544763	AL022314.1	ENSG00000252142.1	HiC_0hr_4kb:HiC_8hr_4kb	rs3218256	0.1886	chr22	37544438	1.72852	2.37325	0.00261095	rs2284033	0.715467	JIA	chr22:37544438-37544438	not_differential	FALSE
OCR_102079	chr22	37544219	37544763	AL022314.1	ENSG00000252142.1	HiC_0hr_4kb:HiC_8hr_4kb	rs3218255	0.2382	chr22	37544486	1.39122	2.00493	0.00220574	rs2284033	0.739228	JIA	chr22:37544486-37544486	not_differential	FALSE
OCR_102079	chr22	37544219	37544763	AL022314.1	ENSG00000252142.1	HiC_0hr_4kb:HiC_8hr_4kb	rs3218255	7.4e-05	chr22	37544486	15.7057	2573.08	0.0828546	rs3218251	0.278682	RA	chr22:37544486-37544486	not_differential	FALSE
OCR_102079	chr22	37544219	37544763	C1QTNF6	ENSG00000133466.9	HiC_0hr_4kb	rs3218258	0.2129	chr22	37544245	1.5516	2.17232	0.0023899	rs2284033	0.730135	JIA	chr22:37544245-37544245	4	FALSE
OCR_102079	chr22	37544219	37544763	C1QTNF6	ENSG00000133466.9	HiC_0hr_4kb	rs3218258	6.8e-05	chr22	37544245	15.8657	2787.36	0.0897544	rs3218251	0.195828	RA	chr22:37544245-37544245	4	FALSE
OCR_102079	chr22	37544219	37544763	C1QTNF6	ENSG00000133466.9	HiC_0hr_4kb	rs228978	0.2173	chr22	37544345	1.52211	2.14054	0.00235493	rs2284033	0.73249	JIA	chr22:37544345-37544345	4	FALSE
OCR_102079	chr22	37544219	37544763	C1QTNF6	ENSG00000133466.9	HiC_0hr_4kb	rs228978	0.00011	chr22	37544345	14.9568	1769.42	0.0569763	rs3218251	0.484602	RA	chr22:37544345-37544345	4	FALSE
OCR_102079	chr22	37544219	37544763	C1QTNF6	ENSG00000133466.9	HiC_0hr_4kb	rs3218256	0.1886	chr22	37544438	1.72852	2.37325	0.00261095	rs2284033	0.715467	JIA	chr22:37544438-37544438	4	FALSE
OCR_102079	chr22	37544219	37544763	C1QTNF6	ENSG00000133466.9	HiC_0hr_4kb	rs3218255	0.2382	chr22	37544486	1.39122	2.00493	0.00220574	rs2284033	0.739228	JIA	chr22:37544486-37544486	4	FALSE
OCR_102079	chr22	37544219	37544763	C1QTNF6	ENSG00000133466.9	HiC_0hr_4kb	rs3218255	7.4e-05	chr22	37544486	15.7057	2573.08	0.0828546	rs3218251	0.278682	RA	chr22:37544486-37544486	4	FALSE
OCR_102079	chr22	37544219	37544763	IL2RB	ENSG00000100385.9	HiC_0hr_4kb:HiC_8hr_4kb	rs3218258	0.2129	chr22	37544245	1.5516	2.17232	0.0023899	rs2284033	0.730135	JIA	chr22:37544245-37544245	3	FALSE
OCR_102079	chr22	37544219	37544763	IL2RB	ENSG00000100385.9	HiC_0hr_4kb:HiC_8hr_4kb	rs3218258	6.8e-05	chr22	37544245	15.8657	2787.36	0.0897544	rs3218251	0.195828	RA	chr22:37544245-37544245	3	FALSE
OCR_102079	chr22	37544219	37544763	IL2RB	ENSG00000100385.9	HiC_0hr_4kb:HiC_8hr_4kb	rs228978	0.2173	chr22	37544345	1.52211	2.14054	0.00235493	rs2284033	0.73249	JIA	chr22:37544345-37544345	3	FALSE
OCR_102079	chr22	37544219	37544763	IL2RB	ENSG00000100385.9	HiC_0hr_4kb:HiC_8hr_4kb	rs228978	0.00011	chr22	37544345	14.9568	1769.42	0.0569763	rs3218251	0.484602	RA	chr22:37544345-37544345	3	FALSE
OCR_102079	chr22	37544219	37544763	IL2RB	ENSG00000100385.9	HiC_0hr_4kb:HiC_8hr_4kb	rs3218256	0.1886	chr22	37544438	1.72852	2.37325	0.00261095	rs2284033	0.715467	JIA	chr22:37544438-37544438	3	FALSE
OCR_102079	chr22	37544219	37544763	IL2RB	ENSG00000100385.9	HiC_0hr_4kb:HiC_8hr_4kb	rs3218255	0.2382	chr22	37544486	1.39122	2.00493	0.00220574	rs2284033	0.739228	JIA	chr22:37544486-37544486	3	FALSE
OCR_102079	chr22	37544219	37544763	IL2RB	ENSG00000100385.9	HiC_0hr_4kb:HiC_8hr_4kb	rs3218255	7.4e-05	chr22	37544486	15.7057	2573.08	0.0828546	rs3218251	0.278682	RA	chr22:37544486-37544486	3	FALSE
OCR_102079	chr22	37544219	37544763	RP5-1170K4.7	ENSG00000231467.2	HiC_0hr_4kb:HiC_8hr_4kb:HiC_24hr_4kb	rs3218258	0.2129	chr22	37544245	1.5516	2.17232	0.0023899	rs2284033	0.730135	JIA	chr22:37544245-37544245	not_differential	FALSE
OCR_102079	chr22	37544219	37544763	RP5-1170K4.7	ENSG00000231467.2	HiC_0hr_4kb:HiC_8hr_4kb:HiC_24hr_4kb	rs3218258	6.8e-05	chr22	37544245	15.8657	2787.36	0.0897544	rs3218251	0.195828	RA	chr22:37544245-37544245	not_differential	FALSE
OCR_102079	chr22	37544219	37544763	RP5-1170K4.7	ENSG00000231467.2	HiC_0hr_4kb:HiC_8hr_4kb:HiC_24hr_4kb	rs228978	0.2173	chr22	37544345	1.52211	2.14054	0.00235493	rs2284033	0.73249	JIA	chr22:37544345-37544345	not_differential	FALSE
OCR_102079	chr22	37544219	37544763	RP5-1170K4.7	ENSG00000231467.2	HiC_0hr_4kb:HiC_8hr_4kb:HiC_24hr_4kb	rs228978	0.00011	chr22	37544345	14.9568	1769.42	0.0569763	rs3218251	0.484602	RA	chr22:37544345-37544345	not_differential	FALSE
OCR_102079	chr22	37544219	37544763	RP5-1170K4.7	ENSG00000231467.2	HiC_0hr_4kb:HiC_8hr_4kb:HiC_24hr_4kb	rs3218256	0.1886	chr22	37544438	1.72852	2.37325	0.00261095	rs2284033	0.715467	JIA	chr22:37544438-37544438	not_differential	FALSE
OCR_102079	chr22	37544219	37544763	RP5-1170K4.7	ENSG00000231467.2	HiC_0hr_4kb:HiC_8hr_4kb:HiC_24hr_4kb	rs3218255	0.2382	chr22	37544486	1.39122	2.00493	0.00220574	rs2284033	0.739228	JIA	chr22:37544486-37544486	not_differential	FALSE
OCR_102079	chr22	37544219	37544763	RP5-1170K4.7	ENSG00000231467.2	HiC_0hr_4kb:HiC_8hr_4kb:HiC_24hr_4kb	rs3218255	7.4e-05	chr22	37544486	15.7057	2573.08	0.0828546	rs3218251	0.278682	RA	chr22:37544486-37544486	not_differential	FALSE
OCR_102079	chr22	37544219	37544763	TMPRSS6	ENSG00000187045.12	HiC_0hr_4kb:HiC_8hr_4kb	rs3218258	0.2129	chr22	37544245	1.5516	2.17232	0.0023899	rs2284033	0.730135	JIA	chr22:37544245-37544245	not_differential	FALSE
OCR_102079	chr22	37544219	37544763	TMPRSS6	ENSG00000187045.12	HiC_0hr_4kb:HiC_8hr_4kb	rs3218258	6.8e-05	chr22	37544245	15.8657	2787.36	0.0897544	rs3218251	0.195828	RA	chr22:37544245-37544245	not_differential	FALSE
OCR_102079	chr22	37544219	37544763	TMPRSS6	ENSG00000187045.12	HiC_0hr_4kb:HiC_8hr_4kb	rs228978	0.2173	chr22	37544345	1.52211	2.14054	0.00235493	rs2284033	0.73249	JIA	chr22:37544345-37544345	not_differential	FALSE
OCR_102079	chr22	37544219	37544763	TMPRSS6	ENSG00000187045.12	HiC_0hr_4kb:HiC_8hr_4kb	rs228978	0.00011	chr22	37544345	14.9568	1769.42	0.0569763	rs3218251	0.484602	RA	chr22:37544345-37544345	not_differential	FALSE
OCR_102079	chr22	37544219	37544763	TMPRSS6	ENSG00000187045.12	HiC_0hr_4kb:HiC_8hr_4kb	rs3218256	0.1886	chr22	37544438	1.72852	2.37325	0.00261095	rs2284033	0.715467	JIA	chr22:37544438-37544438	not_differential	FALSE
OCR_102079	chr22	37544219	37544763	TMPRSS6	ENSG00000187045.12	HiC_0hr_4kb:HiC_8hr_4kb	rs3218255	0.2382	chr22	37544486	1.39122	2.00493	0.00220574	rs2284033	0.739228	JIA	chr22:37544486-37544486	not_differential	FALSE
OCR_102079	chr22	37544219	37544763	TMPRSS6	ENSG00000187045.12	HiC_0hr_4kb:HiC_8hr_4kb	rs3218255	7.4e-05	chr22	37544486	15.7057	2573.08	0.0828546	rs3218251	0.278682	RA	chr22:37544486-37544486	not_differential	FALSE
OCR_102080	chr22	37545313	37546599	AL022314.1	ENSG00000252142.1	HiC_0hr_4kb:HiC_8hr_4kb	rs3218251	0.1148	chr22	37545505	2.48687	3.4675	0.0038148	rs2284033	0.678758	JIA	chr22:37545505-37545505	not_differential	FALSE
OCR_102080	chr22	37545313	37546599	AL022314.1	ENSG00000252142.1	HiC_0hr_4kb:HiC_8hr_4kb	rs3218251	5.7e-05	chr22	37545505	16.1998	3294.15	0.106073	rs3218251	0.106073	RA	chr22:37545505-37545505	not_differential	FALSE
OCR_102080	chr22	37545313	37546599	C1QTNF6	ENSG00000133466.9	HiC_0hr_4kb	rs3218251	0.1148	chr22	37545505	2.48687	3.4675	0.0038148	rs2284033	0.678758	JIA	chr22:37545505-37545505	4	FALSE
OCR_102080	chr22	37545313	37546599	C1QTNF6	ENSG00000133466.9	HiC_0hr_4kb	rs3218251	5.7e-05	chr22	37545505	16.1998	3294.15	0.106073	rs3218251	0.106073	RA	chr22:37545505-37545505	4	FALSE
OCR_102080	chr22	37545313	37546599	IL2RB	ENSG00000100385.9	HiC_0hr_4kb:HiC_8hr_4kb	rs3218251	0.1148	chr22	37545505	2.48687	3.4675	0.0038148	rs2284033	0.678758	JIA	chr22:37545505-37545505	3	FALSE
OCR_102080	chr22	37545313	37546599	IL2RB	ENSG00000100385.9	HiC_0hr_4kb:HiC_8hr_4kb	rs3218251	5.7e-05	chr22	37545505	16.1998	3294.15	0.106073	rs3218251	0.106073	RA	chr22:37545505-37545505	3	FALSE
OCR_102080	chr22	37545313	37546599	RP5-1170K4.7	ENSG00000231467.2	HiC_0hr_4kb:HiC_8hr_2kb:HiC_8hr_4kb:HiC_24hr_4kb	rs3218251	0.1148	chr22	37545505	2.48687	3.4675	0.0038148	rs2284033	0.678758	JIA	chr22:37545505-37545505	not_differential	FALSE
OCR_102080	chr22	37545313	37546599	RP5-1170K4.7	ENSG00000231467.2	HiC_0hr_4kb:HiC_8hr_2kb:HiC_8hr_4kb:HiC_24hr_4kb	rs3218251	5.7e-05	chr22	37545505	16.1998	3294.15	0.106073	rs3218251	0.106073	RA	chr22:37545505-37545505	not_differential	FALSE
OCR_102080	chr22	37545313	37546599	TMPRSS6	ENSG00000187045.12	HiC_0hr_4kb:HiC_8hr_4kb	rs3218251	0.1148	chr22	37545505	2.48687	3.4675	0.0038148	rs2284033	0.678758	JIA	chr22:37545505-37545505	not_differential	FALSE
OCR_102080	chr22	37545313	37546599	TMPRSS6	ENSG00000187045.12	HiC_0hr_4kb:HiC_8hr_4kb	rs3218251	5.7e-05	chr22	37545505	16.1998	3294.15	0.106073	rs3218251	0.106073	RA	chr22:37545505-37545505	not_differential	FALSE
OCR_102082	chr22	37558281	37559208	C1QTNF6	ENSG00000133466.9	HiC_0hr_4kb:HiC_8hr_4kb	rs2051582	0.3517	chr22	37558356	0.867314	1.54289	0.00169743	rs2284033	0.761289	JIA	chr22:37558356-37558356	4	FALSE
OCR_102082	chr22	37558281	37559208	C1QTNF6	ENSG00000133466.9	HiC_0hr_4kb:HiC_8hr_4kb	rs2051582	0.00019	chr22	37558356	13.9275	1057.58	0.0340547	rs3218251	0.518657	RA	chr22:37558356-37558356	4	FALSE
OCR_102082	chr22	37558281	37559208	IL2RB	ENSG00000100385.9	HiC_0hr_4kb:HiC_8hr_4kb	rs2051582	0.3517	chr22	37558356	0.867314	1.54289	0.00169743	rs2284033	0.761289	JIA	chr22:37558356-37558356	3	FALSE
OCR_102082	chr22	37558281	37559208	IL2RB	ENSG00000100385.9	HiC_0hr_4kb:HiC_8hr_4kb	rs2051582	0.00019	chr22	37558356	13.9275	1057.58	0.0340547	rs3218251	0.518657	RA	chr22:37558356-37558356	3	FALSE
OCR_102082	chr22	37558281	37559208	RAC2	ENSG00000128340.10	HiC_0hr_4kb	rs2051582	0.3517	chr22	37558356	0.867314	1.54289	0.00169743	rs2284033	0.761289	JIA	chr22:37558356-37558356	5	FALSE
OCR_102082	chr22	37558281	37559208	RAC2	ENSG00000128340.10	HiC_0hr_4kb	rs2051582	0.00019	chr22	37558356	13.9275	1057.58	0.0340547	rs3218251	0.518657	RA	chr22:37558356-37558356	5	FALSE
OCR_102082	chr22	37558281	37559208	RP5-1170K4.7	ENSG00000231467.2	HiC_0hr_2kb:HiC_0hr_4kb:HiC_8hr_2kb:HiC_8hr_4kb:HiC_24hr_4kb	rs2051582	0.3517	chr22	37558356	0.867314	1.54289	0.00169743	rs2284033	0.761289	JIA	chr22:37558356-37558356	not_differential	FALSE
OCR_102082	chr22	37558281	37559208	RP5-1170K4.7	ENSG00000231467.2	HiC_0hr_2kb:HiC_0hr_4kb:HiC_8hr_2kb:HiC_8hr_4kb:HiC_24hr_4kb	rs2051582	0.00019	chr22	37558356	13.9275	1057.58	0.0340547	rs3218251	0.518657	RA	chr22:37558356-37558356	not_differential	FALSE
OCR_102082	chr22	37558281	37559208	TMPRSS6	ENSG00000187045.12	HiC_8hr_4kb	rs2051582	0.3517	chr22	37558356	0.867314	1.54289	0.00169743	rs2284033	0.761289	JIA	chr22:37558356-37558356	not_differential	FALSE
OCR_102082	chr22	37558281	37559208	TMPRSS6	ENSG00000187045.12	HiC_8hr_4kb	rs2051582	0.00019	chr22	37558356	13.9275	1057.58	0.0340547	rs3218251	0.518657	RA	chr22:37558356-37558356	not_differential	FALSE
OCR_102083	chr22	37559781	37559985	C1QTNF6	ENSG00000133466.9	HiC_0hr_4kb:HiC_8hr_4kb	rs67843390	0.907	chr22	37559801	0.0136477	1.00685	0.00110769	rs2284033	0.945934	JIA	chr22:37559801-37559801	4	FALSE
OCR_102083	chr22	37559781	37559985	IL2RB	ENSG00000100385.9	HiC_0hr_4kb:HiC_8hr_4kb	rs67843390	0.907	chr22	37559801	0.0136477	1.00685	0.00110769	rs2284033	0.945934	JIA	chr22:37559801-37559801	3	FALSE
OCR_102083	chr22	37559781	37559985	RAC2	ENSG00000128340.10	HiC_0hr_4kb	rs67843390	0.907	chr22	37559801	0.0136477	1.00685	0.00110769	rs2284033	0.945934	JIA	chr22:37559801-37559801	5	FALSE
OCR_102083	chr22	37559781	37559985	RP5-1170K4.7	ENSG00000231467.2	HiC_0hr_2kb:HiC_0hr_4kb:HiC_8hr_2kb:HiC_8hr_4kb:HiC_24hr_4kb	rs67843390	0.907	chr22	37559801	0.0136477	1.00685	0.00110769	rs2284033	0.945934	JIA	chr22:37559801-37559801	not_differential	FALSE
OCR_102083	chr22	37559781	37559985	TMPRSS6	ENSG00000187045.12	HiC_8hr_4kb	rs67843390	0.907	chr22	37559801	0.0136477	1.00685	0.00110769	rs2284033	0.945934	JIA	chr22:37559801-37559801	not_differential	FALSE
OCR_102084	chr22	37562279	37562505	C1QTNF6	ENSG00000133466.9	HiC_0hr_2kb:HiC_0hr_4kb:HiC_8hr_4kb	rs12171227	0.7624	chr22	37562467	0.0914038	1.04676	0.00115161	rs2284033	0.866824	JIA	chr22:37562467-37562467	4	FALSE
OCR_102084	chr22	37562279	37562505	KCTD17	ENSG00000100379.13	HiC_0hr_4kb:HiC_8hr_4kb	rs12171227	0.7624	chr22	37562467	0.0914038	1.04676	0.00115161	rs2284033	0.866824	JIA	chr22:37562467-37562467	5	FALSE
OCR_102084	chr22	37562279	37562505	RAC2	ENSG00000128340.10	HiC_0hr_4kb:HiC_8hr_4kb	rs12171227	0.7624	chr22	37562467	0.0914038	1.04676	0.00115161	rs2284033	0.866824	JIA	chr22:37562467-37562467	5	FALSE
OCR_102084	chr22	37562279	37562505	RN7SKP214	ENSG00000201078.1	HiC_0hr_4kb:HiC_8hr_4kb	rs12171227	0.7624	chr22	37562467	0.0914038	1.04676	0.00115161	rs2284033	0.866824	JIA	chr22:37562467-37562467	not_differential	FALSE
OCR_102084	chr22	37562279	37562505	RP5-1170K4.7	ENSG00000231467.2	HiC_0hr_2kb:HiC_0hr_4kb:HiC_8hr_2kb:HiC_8hr_4kb:HiC_24hr_4kb	rs12171227	0.7624	chr22	37562467	0.0914038	1.04676	0.00115161	rs2284033	0.866824	JIA	chr22:37562467-37562467	not_differential	FALSE
OCR_102084	chr22	37562279	37562505	TMPRSS6	ENSG00000187045.12	HiC_0hr_4kb:HiC_8hr_2kb:HiC_8hr_4kb:HiC_24hr_4kb	rs12171227	0.7624	chr22	37562467	0.0914038	1.04676	0.00115161	rs2284033	0.866824	JIA	chr22:37562467-37562467	not_differential	FALSE
OCR_102085	chr22	37562630	37563055	C1QTNF6	ENSG00000133466.9	HiC_0hr_2kb:HiC_0hr_4kb:HiC_8hr_4kb	rs147908781	0.4186	chr22	37562736	0.654242	1.38697	0.00152589	rs2284033	0.78048	JIA	chr22:37562736-37562736	4	FALSE
OCR_102085	chr22	37562630	37563055	C1QTNF6	ENSG00000133466.9	HiC_0hr_2kb:HiC_0hr_4kb:HiC_8hr_4kb	rs13053551	0.4757	chr22	37562807	0.508705	1.28963	0.0014188	rs2284033	0.789244	JIA	chr22:37562807-37562807	4	FALSE
OCR_102085	chr22	37562630	37563055	C1QTNF6	ENSG00000133466.9	HiC_0hr_2kb:HiC_0hr_4kb:HiC_8hr_4kb	rs62235060	0.868	chr22	37562957	0.0276223	1.01391	0.00111546	rs2284033	0.927034	JIA	chr22:37562957-37562957	4	FALSE
OCR_102085	chr22	37562630	37563055	KCTD17	ENSG00000100379.13	HiC_0hr_4kb:HiC_8hr_4kb	rs147908781	0.4186	chr22	37562736	0.654242	1.38697	0.00152589	rs2284033	0.78048	JIA	chr22:37562736-37562736	5	FALSE
OCR_102085	chr22	37562630	37563055	KCTD17	ENSG00000100379.13	HiC_0hr_4kb:HiC_8hr_4kb	rs13053551	0.4757	chr22	37562807	0.508705	1.28963	0.0014188	rs2284033	0.789244	JIA	chr22:37562807-37562807	5	FALSE
OCR_102085	chr22	37562630	37563055	KCTD17	ENSG00000100379.13	HiC_0hr_4kb:HiC_8hr_4kb	rs62235060	0.868	chr22	37562957	0.0276223	1.01391	0.00111546	rs2284033	0.927034	JIA	chr22:37562957-37562957	5	FALSE
OCR_102085	chr22	37562630	37563055	RAC2	ENSG00000128340.10	HiC_0hr_4kb:HiC_8hr_4kb	rs147908781	0.4186	chr22	37562736	0.654242	1.38697	0.00152589	rs2284033	0.78048	JIA	chr22:37562736-37562736	5	FALSE
OCR_102085	chr22	37562630	37563055	RAC2	ENSG00000128340.10	HiC_0hr_4kb:HiC_8hr_4kb	rs13053551	0.4757	chr22	37562807	0.508705	1.28963	0.0014188	rs2284033	0.789244	JIA	chr22:37562807-37562807	5	FALSE
OCR_102085	chr22	37562630	37563055	RAC2	ENSG00000128340.10	HiC_0hr_4kb:HiC_8hr_4kb	rs62235060	0.868	chr22	37562957	0.0276223	1.01391	0.00111546	rs2284033	0.927034	JIA	chr22:37562957-37562957	5	FALSE
OCR_102085	chr22	37562630	37563055	RN7SKP214	ENSG00000201078.1	HiC_0hr_4kb:HiC_8hr_4kb	rs147908781	0.4186	chr22	37562736	0.654242	1.38697	0.00152589	rs2284033	0.78048	JIA	chr22:37562736-37562736	not_differential	FALSE
OCR_102085	chr22	37562630	37563055	RN7SKP214	ENSG00000201078.1	HiC_0hr_4kb:HiC_8hr_4kb	rs13053551	0.4757	chr22	37562807	0.508705	1.28963	0.0014188	rs2284033	0.789244	JIA	chr22:37562807-37562807	not_differential	FALSE
OCR_102085	chr22	37562630	37563055	RN7SKP214	ENSG00000201078.1	HiC_0hr_4kb:HiC_8hr_4kb	rs62235060	0.868	chr22	37562957	0.0276223	1.01391	0.00111546	rs2284033	0.927034	JIA	chr22:37562957-37562957	not_differential	FALSE
OCR_102085	chr22	37562630	37563055	RP5-1170K4.7	ENSG00000231467.2	HiC_0hr_2kb:HiC_0hr_4kb:HiC_8hr_2kb:HiC_8hr_4kb:HiC_24hr_4kb	rs147908781	0.4186	chr22	37562736	0.654242	1.38697	0.00152589	rs2284033	0.78048	JIA	chr22:37562736-37562736	not_differential	FALSE
OCR_102085	chr22	37562630	37563055	RP5-1170K4.7	ENSG00000231467.2	HiC_0hr_2kb:HiC_0hr_4kb:HiC_8hr_2kb:HiC_8hr_4kb:HiC_24hr_4kb	rs13053551	0.4757	chr22	37562807	0.508705	1.28963	0.0014188	rs2284033	0.789244	JIA	chr22:37562807-37562807	not_differential	FALSE
OCR_102085	chr22	37562630	37563055	RP5-1170K4.7	ENSG00000231467.2	HiC_0hr_2kb:HiC_0hr_4kb:HiC_8hr_2kb:HiC_8hr_4kb:HiC_24hr_4kb	rs62235060	0.868	chr22	37562957	0.0276223	1.01391	0.00111546	rs2284033	0.927034	JIA	chr22:37562957-37562957	not_differential	FALSE
OCR_102085	chr22	37562630	37563055	TMPRSS6	ENSG00000187045.12	HiC_0hr_4kb:HiC_8hr_2kb:HiC_8hr_4kb:HiC_24hr_4kb	rs147908781	0.4186	chr22	37562736	0.654242	1.38697	0.00152589	rs2284033	0.78048	JIA	chr22:37562736-37562736	not_differential	FALSE
OCR_102085	chr22	37562630	37563055	TMPRSS6	ENSG00000187045.12	HiC_0hr_4kb:HiC_8hr_2kb:HiC_8hr_4kb:HiC_24hr_4kb	rs13053551	0.4757	chr22	37562807	0.508705	1.28963	0.0014188	rs2284033	0.789244	JIA	chr22:37562807-37562807	not_differential	FALSE
OCR_102085	chr22	37562630	37563055	TMPRSS6	ENSG00000187045.12	HiC_0hr_4kb:HiC_8hr_2kb:HiC_8hr_4kb:HiC_24hr_4kb	rs62235060	0.868	chr22	37562957	0.0276223	1.01391	0.00111546	rs2284033	0.927034	JIA	chr22:37562957-37562957	not_differential	FALSE
OCR_102088	chr22	37581984	37583163	C1QTNF6	ENSG00000133466.9	HiC_0hr_4kb	rs5756540	0.8167	chr22	37582205	0.0537273	1.02723	0.00113011	rs2284033	0.911296	JIA	chr22:37582205-37582205	4	FALSE
OCR_102088	chr22	37581984	37583163	IL2RB	ENSG00000100385.9	HiC_0hr_4kb:HiC_8hr_4kb:HiC_24hr_4kb	rs5756540	0.8167	chr22	37582205	0.0537273	1.02723	0.00113011	rs2284033	0.911296	JIA	chr22:37582205-37582205	3	FALSE
OCR_102088	chr22	37581984	37583163	KCTD17	ENSG00000100379.13	HiC_8hr_4kb:HiC_24hr_4kb	rs5756540	0.8167	chr22	37582205	0.0537273	1.02723	0.00113011	rs2284033	0.911296	JIA	chr22:37582205-37582205	5	FALSE
OCR_102088	chr22	37581984	37583163	RN7SKP214	ENSG00000201078.1	HiC_8hr_4kb:HiC_24hr_4kb	rs5756540	0.8167	chr22	37582205	0.0537273	1.02723	0.00113011	rs2284033	0.911296	JIA	chr22:37582205-37582205	not_differential	FALSE
OCR_102088	chr22	37581984	37583163	RP1-151B14.6	ENSG00000235237.1	HiC_0hr_4kb:HiC_8hr_4kb	rs5756540	0.8167	chr22	37582205	0.0537273	1.02723	0.00113011	rs2284033	0.911296	JIA	chr22:37582205-37582205	not_differential	FALSE
OCR_102088	chr22	37581984	37583163	RP5-1170K4.7	ENSG00000231467.2	HiC_0hr_2kb:HiC_0hr_4kb:HiC_8hr_2kb:HiC_8hr_4kb:HiC_24hr_4kb	rs5756540	0.8167	chr22	37582205	0.0537273	1.02723	0.00113011	rs2284033	0.911296	JIA	chr22:37582205-37582205	not_differential	FALSE
OCR_102088	chr22	37581984	37583163	TMPRSS6	ENSG00000187045.12	HiC_0hr_4kb:HiC_8hr_4kb:HiC_24hr_4kb	rs5756540	0.8167	chr22	37582205	0.0537273	1.02723	0.00113011	rs2284033	0.911296	JIA	chr22:37582205-37582205	not_differential	FALSE
OCR_102089	chr22	37589740	37590292	IL2RB	ENSG00000100385.9	HiC_0hr_4kb	rs5756546	0.0028	chr22	37589805	8.93342	87.0697	0.00280369	rs3218251	0.814949	RA	chr22:37589805-37589805	3	FALSE
OCR_102089	chr22	37589740	37590292	IL2RB	ENSG00000100385.9	HiC_0hr_4kb	rs229536	0.8708	chr22	37589869	0.0264526	1.01331	0.00111481	rs2284033	0.929264	JIA	chr22:37589869-37589869	3	FALSE
OCR_102089	chr22	37589740	37590292	IL2RB	ENSG00000100385.9	HiC_0hr_4kb	rs229536	2.41978e-08	chr22	37589869	31.1247	5.73631e+06	0.284337	rs229533	0.666242	T1D	chr22:37589869-37589869	3	FALSE
OCR_102089	chr22	37589740	37590292	IL2RB	ENSG00000100385.9	HiC_0hr_4kb	rs2858489	0.9028	chr22	37590203	0.0149145	1.00749	0.00110839	rs2284033	0.943718	JIA	chr22:37590203-37590203	3	FALSE
OCR_102089	chr22	37589740	37590292	KCTD17	ENSG00000100379.13	HiC_0hr_4kb:HiC_8hr_4kb:HiC_24hr_4kb	rs5756546	0.0028	chr22	37589805	8.93342	87.0697	0.00280369	rs3218251	0.814949	RA	chr22:37589805-37589805	5	FALSE
OCR_102089	chr22	37589740	37590292	KCTD17	ENSG00000100379.13	HiC_0hr_4kb:HiC_8hr_4kb:HiC_24hr_4kb	rs229536	0.8708	chr22	37589869	0.0264526	1.01331	0.00111481	rs2284033	0.929264	JIA	chr22:37589869-37589869	5	FALSE
OCR_102089	chr22	37589740	37590292	KCTD17	ENSG00000100379.13	HiC_0hr_4kb:HiC_8hr_4kb:HiC_24hr_4kb	rs229536	2.41978e-08	chr22	37589869	31.1247	5.73631e+06	0.284337	rs229533	0.666242	T1D	chr22:37589869-37589869	5	FALSE
OCR_102089	chr22	37589740	37590292	KCTD17	ENSG00000100379.13	HiC_0hr_4kb:HiC_8hr_4kb:HiC_24hr_4kb	rs2858489	0.9028	chr22	37590203	0.0149145	1.00749	0.00110839	rs2284033	0.943718	JIA	chr22:37590203-37590203	5	FALSE
OCR_102089	chr22	37589740	37590292	RN7SKP214	ENSG00000201078.1	HiC_0hr_4kb:HiC_8hr_4kb:HiC_24hr_4kb	rs5756546	0.0028	chr22	37589805	8.93342	87.0697	0.00280369	rs3218251	0.814949	RA	chr22:37589805-37589805	not_differential	FALSE
OCR_102089	chr22	37589740	37590292	RN7SKP214	ENSG00000201078.1	HiC_0hr_4kb:HiC_8hr_4kb:HiC_24hr_4kb	rs229536	0.8708	chr22	37589869	0.0264526	1.01331	0.00111481	rs2284033	0.929264	JIA	chr22:37589869-37589869	not_differential	FALSE
OCR_102089	chr22	37589740	37590292	RN7SKP214	ENSG00000201078.1	HiC_0hr_4kb:HiC_8hr_4kb:HiC_24hr_4kb	rs229536	2.41978e-08	chr22	37589869	31.1247	5.73631e+06	0.284337	rs229533	0.666242	T1D	chr22:37589869-37589869	not_differential	FALSE
OCR_102089	chr22	37589740	37590292	RN7SKP214	ENSG00000201078.1	HiC_0hr_4kb:HiC_8hr_4kb:HiC_24hr_4kb	rs2858489	0.9028	chr22	37590203	0.0149145	1.00749	0.00110839	rs2284033	0.943718	JIA	chr22:37590203-37590203	not_differential	FALSE
OCR_102089	chr22	37589740	37590292	RP1-151B14.6	ENSG00000235237.1	HiC_0hr_2kb:HiC_0hr_4kb	rs5756546	0.0028	chr22	37589805	8.93342	87.0697	0.00280369	rs3218251	0.814949	RA	chr22:37589805-37589805	not_differential	FALSE
OCR_102089	chr22	37589740	37590292	RP1-151B14.6	ENSG00000235237.1	HiC_0hr_2kb:HiC_0hr_4kb	rs229536	0.8708	chr22	37589869	0.0264526	1.01331	0.00111481	rs2284033	0.929264	JIA	chr22:37589869-37589869	not_differential	FALSE
OCR_102089	chr22	37589740	37590292	RP1-151B14.6	ENSG00000235237.1	HiC_0hr_2kb:HiC_0hr_4kb	rs229536	2.41978e-08	chr22	37589869	31.1247	5.73631e+06	0.284337	rs229533	0.666242	T1D	chr22:37589869-37589869	not_differential	FALSE
OCR_102089	chr22	37589740	37590292	RP1-151B14.6	ENSG00000235237.1	HiC_0hr_2kb:HiC_0hr_4kb	rs2858489	0.9028	chr22	37590203	0.0149145	1.00749	0.00110839	rs2284033	0.943718	JIA	chr22:37590203-37590203	not_differential	FALSE
OCR_102089	chr22	37589740	37590292	RP5-1170K4.7	ENSG00000231467.2	HiC_0hr_2kb:HiC_0hr_4kb:HiC_8hr_2kb:HiC_8hr_4kb:HiC_24hr_4kb	rs5756546	0.0028	chr22	37589805	8.93342	87.0697	0.00280369	rs3218251	0.814949	RA	chr22:37589805-37589805	not_differential	FALSE
OCR_102089	chr22	37589740	37590292	RP5-1170K4.7	ENSG00000231467.2	HiC_0hr_2kb:HiC_0hr_4kb:HiC_8hr_2kb:HiC_8hr_4kb:HiC_24hr_4kb	rs229536	0.8708	chr22	37589869	0.0264526	1.01331	0.00111481	rs2284033	0.929264	JIA	chr22:37589869-37589869	not_differential	FALSE
OCR_102089	chr22	37589740	37590292	RP5-1170K4.7	ENSG00000231467.2	HiC_0hr_2kb:HiC_0hr_4kb:HiC_8hr_2kb:HiC_8hr_4kb:HiC_24hr_4kb	rs229536	2.41978e-08	chr22	37589869	31.1247	5.73631e+06	0.284337	rs229533	0.666242	T1D	chr22:37589869-37589869	not_differential	FALSE
OCR_102089	chr22	37589740	37590292	RP5-1170K4.7	ENSG00000231467.2	HiC_0hr_2kb:HiC_0hr_4kb:HiC_8hr_2kb:HiC_8hr_4kb:HiC_24hr_4kb	rs2858489	0.9028	chr22	37590203	0.0149145	1.00749	0.00110839	rs2284033	0.943718	JIA	chr22:37590203-37590203	not_differential	FALSE
OCR_102089	chr22	37589740	37590292	TMPRSS6	ENSG00000187045.12	HiC_0hr_4kb:HiC_8hr_4kb	rs5756546	0.0028	chr22	37589805	8.93342	87.0697	0.00280369	rs3218251	0.814949	RA	chr22:37589805-37589805	not_differential	FALSE
OCR_102089	chr22	37589740	37590292	TMPRSS6	ENSG00000187045.12	HiC_0hr_4kb:HiC_8hr_4kb	rs229536	0.8708	chr22	37589869	0.0264526	1.01331	0.00111481	rs2284033	0.929264	JIA	chr22:37589869-37589869	not_differential	FALSE
OCR_102089	chr22	37589740	37590292	TMPRSS6	ENSG00000187045.12	HiC_0hr_4kb:HiC_8hr_4kb	rs229536	2.41978e-08	chr22	37589869	31.1247	5.73631e+06	0.284337	rs229533	0.666242	T1D	chr22:37589869-37589869	not_differential	FALSE
OCR_102089	chr22	37589740	37590292	TMPRSS6	ENSG00000187045.12	HiC_0hr_4kb:HiC_8hr_4kb	rs2858489	0.9028	chr22	37590203	0.0149145	1.00749	0.00110839	rs2284033	0.943718	JIA	chr22:37590203-37590203	not_differential	FALSE
OCR_102090	chr22	37594525	37596086	C1QTNF6	ENSG00000133466.9	HiC_0hr_4kb	rs62235067	0.01336	chr22	37594541	6.1208	21.3361	0.0234732	rs2284033	0.628909	JIA	chr22:37594541-37594541	4	FALSE
OCR_102090	chr22	37594525	37596086	C1QTNF6	ENSG00000133466.9	HiC_0hr_4kb	rs4140871	0.7397	chr22	37594825	0.11039	1.05675	0.00116259	rs2284033	0.846001	JIA	chr22:37594825-37594825	4	FALSE
OCR_102090	chr22	37594525	37596086	C1QTNF6	ENSG00000133466.9	HiC_0hr_4kb	rs71317032	0.7034	chr22	37595156	0.144959	1.07517	0.00118286	rs2284033	0.835444	JIA	chr22:37595156-37595156	4	FALSE
OCR_102090	chr22	37594525	37596086	C1QTNF6	ENSG00000133466.9	HiC_0hr_4kb	rs1001810	0.678	chr22	37595486	0.172386	1.09002	0.00119919	rs2284033	0.828307	JIA	chr22:37595486-37595486	4	FALSE
OCR_102090	chr22	37594525	37596086	C1QTNF6	ENSG00000133466.9	HiC_0hr_4kb	rs16997918	0.8796	chr22	37595916	0.0229451	1.01154	0.00111285	rs2284033	0.937058	JIA	chr22:37595916-37595916	4	FALSE
OCR_102090	chr22	37594525	37596086	IL2RB	ENSG00000100385.9	HiC_0hr_4kb:HiC_8hr_4kb	rs62235067	0.01336	chr22	37594541	6.1208	21.3361	0.0234732	rs2284033	0.628909	JIA	chr22:37594541-37594541	3	FALSE
OCR_102090	chr22	37594525	37596086	IL2RB	ENSG00000100385.9	HiC_0hr_4kb:HiC_8hr_4kb	rs4140871	0.7397	chr22	37594825	0.11039	1.05675	0.00116259	rs2284033	0.846001	JIA	chr22:37594825-37594825	3	FALSE
OCR_102090	chr22	37594525	37596086	IL2RB	ENSG00000100385.9	HiC_0hr_4kb:HiC_8hr_4kb	rs71317032	0.7034	chr22	37595156	0.144959	1.07517	0.00118286	rs2284033	0.835444	JIA	chr22:37595156-37595156	3	FALSE
OCR_102090	chr22	37594525	37596086	IL2RB	ENSG00000100385.9	HiC_0hr_4kb:HiC_8hr_4kb	rs1001810	0.678	chr22	37595486	0.172386	1.09002	0.00119919	rs2284033	0.828307	JIA	chr22:37595486-37595486	3	FALSE
OCR_102090	chr22	37594525	37596086	IL2RB	ENSG00000100385.9	HiC_0hr_4kb:HiC_8hr_4kb	rs16997918	0.8796	chr22	37595916	0.0229451	1.01154	0.00111285	rs2284033	0.937058	JIA	chr22:37595916-37595916	3	FALSE
OCR_102090	chr22	37594525	37596086	KCTD17	ENSG00000100379.13	HiC_0hr_4kb:HiC_8hr_4kb:HiC_24hr_4kb	rs62235067	0.01336	chr22	37594541	6.1208	21.3361	0.0234732	rs2284033	0.628909	JIA	chr22:37594541-37594541	5	FALSE
OCR_102090	chr22	37594525	37596086	KCTD17	ENSG00000100379.13	HiC_0hr_4kb:HiC_8hr_4kb:HiC_24hr_4kb	rs4140871	0.7397	chr22	37594825	0.11039	1.05675	0.00116259	rs2284033	0.846001	JIA	chr22:37594825-37594825	5	FALSE
OCR_102090	chr22	37594525	37596086	KCTD17	ENSG00000100379.13	HiC_0hr_4kb:HiC_8hr_4kb:HiC_24hr_4kb	rs71317032	0.7034	chr22	37595156	0.144959	1.07517	0.00118286	rs2284033	0.835444	JIA	chr22:37595156-37595156	5	FALSE
OCR_102090	chr22	37594525	37596086	KCTD17	ENSG00000100379.13	HiC_0hr_4kb:HiC_8hr_4kb:HiC_24hr_4kb	rs1001810	0.678	chr22	37595486	0.172386	1.09002	0.00119919	rs2284033	0.828307	JIA	chr22:37595486-37595486	5	FALSE
OCR_102090	chr22	37594525	37596086	KCTD17	ENSG00000100379.13	HiC_0hr_4kb:HiC_8hr_4kb:HiC_24hr_4kb	rs16997918	0.8796	chr22	37595916	0.0229451	1.01154	0.00111285	rs2284033	0.937058	JIA	chr22:37595916-37595916	5	FALSE
OCR_102090	chr22	37594525	37596086	RAC2	ENSG00000128340.10	HiC_0hr_2kb:HiC_0hr_4kb:HiC_8hr_2kb:HiC_8hr_4kb	rs62235067	0.01336	chr22	37594541	6.1208	21.3361	0.0234732	rs2284033	0.628909	JIA	chr22:37594541-37594541	5	FALSE
OCR_102090	chr22	37594525	37596086	RAC2	ENSG00000128340.10	HiC_0hr_2kb:HiC_0hr_4kb:HiC_8hr_2kb:HiC_8hr_4kb	rs4140871	0.7397	chr22	37594825	0.11039	1.05675	0.00116259	rs2284033	0.846001	JIA	chr22:37594825-37594825	5	FALSE
OCR_102090	chr22	37594525	37596086	RAC2	ENSG00000128340.10	HiC_0hr_2kb:HiC_0hr_4kb:HiC_8hr_2kb:HiC_8hr_4kb	rs71317032	0.7034	chr22	37595156	0.144959	1.07517	0.00118286	rs2284033	0.835444	JIA	chr22:37595156-37595156	5	FALSE
OCR_102090	chr22	37594525	37596086	RAC2	ENSG00000128340.10	HiC_0hr_2kb:HiC_0hr_4kb:HiC_8hr_2kb:HiC_8hr_4kb	rs1001810	0.678	chr22	37595486	0.172386	1.09002	0.00119919	rs2284033	0.828307	JIA	chr22:37595486-37595486	5	FALSE
OCR_102090	chr22	37594525	37596086	RAC2	ENSG00000128340.10	HiC_0hr_2kb:HiC_0hr_4kb:HiC_8hr_2kb:HiC_8hr_4kb	rs16997918	0.8796	chr22	37595916	0.0229451	1.01154	0.00111285	rs2284033	0.937058	JIA	chr22:37595916-37595916	5	FALSE
OCR_102090	chr22	37594525	37596086	RN7SKP214	ENSG00000201078.1	HiC_0hr_4kb:HiC_8hr_4kb:HiC_24hr_4kb	rs62235067	0.01336	chr22	37594541	6.1208	21.3361	0.0234732	rs2284033	0.628909	JIA	chr22:37594541-37594541	not_differential	FALSE
OCR_102090	chr22	37594525	37596086	RN7SKP214	ENSG00000201078.1	HiC_0hr_4kb:HiC_8hr_4kb:HiC_24hr_4kb	rs4140871	0.7397	chr22	37594825	0.11039	1.05675	0.00116259	rs2284033	0.846001	JIA	chr22:37594825-37594825	not_differential	FALSE
OCR_102090	chr22	37594525	37596086	RN7SKP214	ENSG00000201078.1	HiC_0hr_4kb:HiC_8hr_4kb:HiC_24hr_4kb	rs71317032	0.7034	chr22	37595156	0.144959	1.07517	0.00118286	rs2284033	0.835444	JIA	chr22:37595156-37595156	not_differential	FALSE
OCR_102090	chr22	37594525	37596086	RN7SKP214	ENSG00000201078.1	HiC_0hr_4kb:HiC_8hr_4kb:HiC_24hr_4kb	rs1001810	0.678	chr22	37595486	0.172386	1.09002	0.00119919	rs2284033	0.828307	JIA	chr22:37595486-37595486	not_differential	FALSE
OCR_102090	chr22	37594525	37596086	RN7SKP214	ENSG00000201078.1	HiC_0hr_4kb:HiC_8hr_4kb:HiC_24hr_4kb	rs16997918	0.8796	chr22	37595916	0.0229451	1.01154	0.00111285	rs2284033	0.937058	JIA	chr22:37595916-37595916	not_differential	FALSE
OCR_102090	chr22	37594525	37596086	RP1-151B14.6	ENSG00000235237.1	HiC_0hr_2kb:HiC_0hr_4kb:HiC_8hr_4kb	rs62235067	0.01336	chr22	37594541	6.1208	21.3361	0.0234732	rs2284033	0.628909	JIA	chr22:37594541-37594541	not_differential	FALSE
OCR_102090	chr22	37594525	37596086	RP1-151B14.6	ENSG00000235237.1	HiC_0hr_2kb:HiC_0hr_4kb:HiC_8hr_4kb	rs4140871	0.7397	chr22	37594825	0.11039	1.05675	0.00116259	rs2284033	0.846001	JIA	chr22:37594825-37594825	not_differential	FALSE
OCR_102090	chr22	37594525	37596086	RP1-151B14.6	ENSG00000235237.1	HiC_0hr_2kb:HiC_0hr_4kb:HiC_8hr_4kb	rs71317032	0.7034	chr22	37595156	0.144959	1.07517	0.00118286	rs2284033	0.835444	JIA	chr22:37595156-37595156	not_differential	FALSE
OCR_102090	chr22	37594525	37596086	RP1-151B14.6	ENSG00000235237.1	HiC_0hr_2kb:HiC_0hr_4kb:HiC_8hr_4kb	rs1001810	0.678	chr22	37595486	0.172386	1.09002	0.00119919	rs2284033	0.828307	JIA	chr22:37595486-37595486	not_differential	FALSE
OCR_102090	chr22	37594525	37596086	RP1-151B14.6	ENSG00000235237.1	HiC_0hr_2kb:HiC_0hr_4kb:HiC_8hr_4kb	rs16997918	0.8796	chr22	37595916	0.0229451	1.01154	0.00111285	rs2284033	0.937058	JIA	chr22:37595916-37595916	not_differential	FALSE
OCR_102090	chr22	37594525	37596086	RP5-1170K4.7	ENSG00000231467.2	HiC_0hr_1kb:HiC_0hr_2kb:HiC_0hr_4kb:HiC_8hr_1kb:HiC_8hr_2kb:HiC_8hr_4kb:HiC_24hr_2kb:HiC_24hr_4kb	rs62235067	0.01336	chr22	37594541	6.1208	21.3361	0.0234732	rs2284033	0.628909	JIA	chr22:37594541-37594541	not_differential	FALSE
OCR_102090	chr22	37594525	37596086	RP5-1170K4.7	ENSG00000231467.2	HiC_0hr_1kb:HiC_0hr_2kb:HiC_0hr_4kb:HiC_8hr_1kb:HiC_8hr_2kb:HiC_8hr_4kb:HiC_24hr_2kb:HiC_24hr_4kb	rs4140871	0.7397	chr22	37594825	0.11039	1.05675	0.00116259	rs2284033	0.846001	JIA	chr22:37594825-37594825	not_differential	FALSE
OCR_102090	chr22	37594525	37596086	RP5-1170K4.7	ENSG00000231467.2	HiC_0hr_1kb:HiC_0hr_2kb:HiC_0hr_4kb:HiC_8hr_1kb:HiC_8hr_2kb:HiC_8hr_4kb:HiC_24hr_2kb:HiC_24hr_4kb	rs71317032	0.7034	chr22	37595156	0.144959	1.07517	0.00118286	rs2284033	0.835444	JIA	chr22:37595156-37595156	not_differential	FALSE
OCR_102090	chr22	37594525	37596086	RP5-1170K4.7	ENSG00000231467.2	HiC_0hr_1kb:HiC_0hr_2kb:HiC_0hr_4kb:HiC_8hr_1kb:HiC_8hr_2kb:HiC_8hr_4kb:HiC_24hr_2kb:HiC_24hr_4kb	rs1001810	0.678	chr22	37595486	0.172386	1.09002	0.00119919	rs2284033	0.828307	JIA	chr22:37595486-37595486	not_differential	FALSE
OCR_102090	chr22	37594525	37596086	RP5-1170K4.7	ENSG00000231467.2	HiC_0hr_1kb:HiC_0hr_2kb:HiC_0hr_4kb:HiC_8hr_1kb:HiC_8hr_2kb:HiC_8hr_4kb:HiC_24hr_2kb:HiC_24hr_4kb	rs16997918	0.8796	chr22	37595916	0.0229451	1.01154	0.00111285	rs2284033	0.937058	JIA	chr22:37595916-37595916	not_differential	FALSE
OCR_102090	chr22	37594525	37596086	SSTR3	ENSG00000183473.5	HiC_0hr_4kb:HiC_8hr_4kb	rs62235067	0.01336	chr22	37594541	6.1208	21.3361	0.0234732	rs2284033	0.628909	JIA	chr22:37594541-37594541	4	FALSE
OCR_102090	chr22	37594525	37596086	SSTR3	ENSG00000183473.5	HiC_0hr_4kb:HiC_8hr_4kb	rs4140871	0.7397	chr22	37594825	0.11039	1.05675	0.00116259	rs2284033	0.846001	JIA	chr22:37594825-37594825	4	FALSE
OCR_102090	chr22	37594525	37596086	SSTR3	ENSG00000183473.5	HiC_0hr_4kb:HiC_8hr_4kb	rs71317032	0.7034	chr22	37595156	0.144959	1.07517	0.00118286	rs2284033	0.835444	JIA	chr22:37595156-37595156	4	FALSE
OCR_102090	chr22	37594525	37596086	SSTR3	ENSG00000183473.5	HiC_0hr_4kb:HiC_8hr_4kb	rs1001810	0.678	chr22	37595486	0.172386	1.09002	0.00119919	rs2284033	0.828307	JIA	chr22:37595486-37595486	4	FALSE
OCR_102090	chr22	37594525	37596086	SSTR3	ENSG00000183473.5	HiC_0hr_4kb:HiC_8hr_4kb	rs16997918	0.8796	chr22	37595916	0.0229451	1.01154	0.00111285	rs2284033	0.937058	JIA	chr22:37595916-37595916	4	FALSE
OCR_102090	chr22	37594525	37596086	TMPRSS6	ENSG00000187045.12	HiC_0hr_2kb:HiC_0hr_4kb:HiC_8hr_4kb:HiC_24hr_4kb	rs62235067	0.01336	chr22	37594541	6.1208	21.3361	0.0234732	rs2284033	0.628909	JIA	chr22:37594541-37594541	not_differential	FALSE
OCR_102090	chr22	37594525	37596086	TMPRSS6	ENSG00000187045.12	HiC_0hr_2kb:HiC_0hr_4kb:HiC_8hr_4kb:HiC_24hr_4kb	rs4140871	0.7397	chr22	37594825	0.11039	1.05675	0.00116259	rs2284033	0.846001	JIA	chr22:37594825-37594825	not_differential	FALSE
OCR_102090	chr22	37594525	37596086	TMPRSS6	ENSG00000187045.12	HiC_0hr_2kb:HiC_0hr_4kb:HiC_8hr_4kb:HiC_24hr_4kb	rs71317032	0.7034	chr22	37595156	0.144959	1.07517	0.00118286	rs2284033	0.835444	JIA	chr22:37595156-37595156	not_differential	FALSE
OCR_102090	chr22	37594525	37596086	TMPRSS6	ENSG00000187045.12	HiC_0hr_2kb:HiC_0hr_4kb:HiC_8hr_4kb:HiC_24hr_4kb	rs1001810	0.678	chr22	37595486	0.172386	1.09002	0.00119919	rs2284033	0.828307	JIA	chr22:37595486-37595486	not_differential	FALSE
OCR_102090	chr22	37594525	37596086	TMPRSS6	ENSG00000187045.12	HiC_0hr_2kb:HiC_0hr_4kb:HiC_8hr_4kb:HiC_24hr_4kb	rs16997918	0.8796	chr22	37595916	0.0229451	1.01154	0.00111285	rs2284033	0.937058	JIA	chr22:37595916-37595916	not_differential	FALSE
OCR_102091	chr22	37603882	37604593	IFT27	ENSG00000100360.10	HiC_0hr_4kb	rs69264	0.7364	chr22	37603950	0.113316	1.05829	0.00116429	rs2284033	0.844838	JIA	chr22:37603950-37603950	not_differential	FALSE
OCR_102091	chr22	37603882	37604593	KCTD17	ENSG00000100379.13	HiC_24hr_4kb	rs69264	0.7364	chr22	37603950	0.113316	1.05829	0.00116429	rs2284033	0.844838	JIA	chr22:37603950-37603950	5	FALSE
OCR_102091	chr22	37603882	37604593	RAC2	ENSG00000128340.10	HiC_0hr_4kb:HiC_8hr_4kb	rs69264	0.7364	chr22	37603950	0.113316	1.05829	0.00116429	rs2284033	0.844838	JIA	chr22:37603950-37603950	5	FALSE
OCR_102091	chr22	37603882	37604593	RN7SKP214	ENSG00000201078.1	HiC_24hr_4kb	rs69264	0.7364	chr22	37603950	0.113316	1.05829	0.00116429	rs2284033	0.844838	JIA	chr22:37603950-37603950	not_differential	FALSE
OCR_102091	chr22	37603882	37604593	RP5-1170K4.7	ENSG00000231467.2	HiC_0hr_4kb:HiC_8hr_4kb:HiC_24hr_4kb	rs69264	0.7364	chr22	37603950	0.113316	1.05829	0.00116429	rs2284033	0.844838	JIA	chr22:37603950-37603950	not_differential	FALSE
OCR_102091	chr22	37603882	37604593	TMPRSS6	ENSG00000187045.12	HiC_8hr_4kb	rs69264	0.7364	chr22	37603950	0.113316	1.05829	0.00116429	rs2284033	0.844838	JIA	chr22:37603950-37603950	not_differential	FALSE
OCR_102093	chr22	37614561	37615513	C1QTNF6	ENSG00000133466.9	HiC_0hr_4kb	rs56141786	0.6484	chr22	37614705	0.207923	1.10956	0.00122069	rs2284033	0.823467	JIA	chr22:37614705-37614705	4	FALSE
OCR_102093	chr22	37614561	37615513	C1QTNF6	ENSG00000133466.9	HiC_0hr_4kb	rs6000613	0.7801	chr22	37614738	0.0779463	1.03974	0.00114388	rs2284033	0.885182	JIA	chr22:37614738-37614738	4	FALSE
OCR_102093	chr22	37614561	37615513	C1QTNF6	ENSG00000133466.9	HiC_0hr_4kb	rs9607427	0.6882	chr22	37615356	0.161041	1.08385	0.00119241	rs2284033	0.831889	JIA	chr22:37615356-37615356	4	FALSE
OCR_102093	chr22	37614561	37615513	MFNG	ENSG00000100060.13	HiC_0hr_4kb	rs56141786	0.6484	chr22	37614705	0.207923	1.10956	0.00122069	rs2284033	0.823467	JIA	chr22:37614705-37614705	5	FALSE
OCR_102093	chr22	37614561	37615513	MFNG	ENSG00000100060.13	HiC_0hr_4kb	rs6000613	0.7801	chr22	37614738	0.0779463	1.03974	0.00114388	rs2284033	0.885182	JIA	chr22:37614738-37614738	5	FALSE
OCR_102093	chr22	37614561	37615513	MFNG	ENSG00000100060.13	HiC_0hr_4kb	rs9607427	0.6882	chr22	37615356	0.161041	1.08385	0.00119241	rs2284033	0.831889	JIA	chr22:37615356-37615356	5	FALSE
OCR_102093	chr22	37614561	37615513	RAC2	ENSG00000128340.10	HiC_0hr_2kb:HiC_0hr_4kb:HiC_8hr_4kb	rs56141786	0.6484	chr22	37614705	0.207923	1.10956	0.00122069	rs2284033	0.823467	JIA	chr22:37614705-37614705	5	FALSE
OCR_102093	chr22	37614561	37615513	RAC2	ENSG00000128340.10	HiC_0hr_2kb:HiC_0hr_4kb:HiC_8hr_4kb	rs6000613	0.7801	chr22	37614738	0.0779463	1.03974	0.00114388	rs2284033	0.885182	JIA	chr22:37614738-37614738	5	FALSE
OCR_102093	chr22	37614561	37615513	RAC2	ENSG00000128340.10	HiC_0hr_2kb:HiC_0hr_4kb:HiC_8hr_4kb	rs9607427	0.6882	chr22	37615356	0.161041	1.08385	0.00119241	rs2284033	0.831889	JIA	chr22:37615356-37615356	5	FALSE
OCR_102093	chr22	37614561	37615513	RP1-151B14.6	ENSG00000235237.1	HiC_0hr_4kb	rs56141786	0.6484	chr22	37614705	0.207923	1.10956	0.00122069	rs2284033	0.823467	JIA	chr22:37614705-37614705	not_differential	FALSE
OCR_102093	chr22	37614561	37615513	RP1-151B14.6	ENSG00000235237.1	HiC_0hr_4kb	rs6000613	0.7801	chr22	37614738	0.0779463	1.03974	0.00114388	rs2284033	0.885182	JIA	chr22:37614738-37614738	not_differential	FALSE
OCR_102093	chr22	37614561	37615513	RP1-151B14.6	ENSG00000235237.1	HiC_0hr_4kb	rs9607427	0.6882	chr22	37615356	0.161041	1.08385	0.00119241	rs2284033	0.831889	JIA	chr22:37615356-37615356	not_differential	FALSE
OCR_102093	chr22	37614561	37615513	RP5-1170K4.7	ENSG00000231467.2	HiC_0hr_4kb:HiC_8hr_4kb	rs56141786	0.6484	chr22	37614705	0.207923	1.10956	0.00122069	rs2284033	0.823467	JIA	chr22:37614705-37614705	not_differential	FALSE
OCR_102093	chr22	37614561	37615513	RP5-1170K4.7	ENSG00000231467.2	HiC_0hr_4kb:HiC_8hr_4kb	rs6000613	0.7801	chr22	37614738	0.0779463	1.03974	0.00114388	rs2284033	0.885182	JIA	chr22:37614738-37614738	not_differential	FALSE
OCR_102093	chr22	37614561	37615513	RP5-1170K4.7	ENSG00000231467.2	HiC_0hr_4kb:HiC_8hr_4kb	rs9607427	0.6882	chr22	37615356	0.161041	1.08385	0.00119241	rs2284033	0.831889	JIA	chr22:37615356-37615356	not_differential	FALSE
OCR_102094	chr22	37615574	37615882	C1QTNF6	ENSG00000133466.9	HiC_0hr_4kb	rs4820272	0.7446	chr22	37615614	0.106125	1.0545	0.00116011	rs2284033	0.851809	JIA	chr22:37615614-37615614	4	FALSE
OCR_102094	chr22	37615574	37615882	C1QTNF6	ENSG00000133466.9	HiC_0hr_4kb	rs4820273	0.8047	chr22	37615682	0.061142	1.03104	0.00113431	rs2284033	0.89658	JIA	chr22:37615682-37615682	4	FALSE
OCR_102094	chr22	37615574	37615882	MFNG	ENSG00000100060.13	HiC_0hr_4kb	rs4820272	0.7446	chr22	37615614	0.106125	1.0545	0.00116011	rs2284033	0.851809	JIA	chr22:37615614-37615614	5	FALSE
OCR_102094	chr22	37615574	37615882	MFNG	ENSG00000100060.13	HiC_0hr_4kb	rs4820273	0.8047	chr22	37615682	0.061142	1.03104	0.00113431	rs2284033	0.89658	JIA	chr22:37615682-37615682	5	FALSE
OCR_102094	chr22	37615574	37615882	RAC2	ENSG00000128340.10	HiC_0hr_2kb:HiC_0hr_4kb:HiC_8hr_4kb	rs4820272	0.7446	chr22	37615614	0.106125	1.0545	0.00116011	rs2284033	0.851809	JIA	chr22:37615614-37615614	5	FALSE
OCR_102094	chr22	37615574	37615882	RAC2	ENSG00000128340.10	HiC_0hr_2kb:HiC_0hr_4kb:HiC_8hr_4kb	rs4820273	0.8047	chr22	37615682	0.061142	1.03104	0.00113431	rs2284033	0.89658	JIA	chr22:37615682-37615682	5	FALSE
OCR_102094	chr22	37615574	37615882	RP1-151B14.6	ENSG00000235237.1	HiC_0hr_4kb	rs4820272	0.7446	chr22	37615614	0.106125	1.0545	0.00116011	rs2284033	0.851809	JIA	chr22:37615614-37615614	not_differential	FALSE
OCR_102094	chr22	37615574	37615882	RP1-151B14.6	ENSG00000235237.1	HiC_0hr_4kb	rs4820273	0.8047	chr22	37615682	0.061142	1.03104	0.00113431	rs2284033	0.89658	JIA	chr22:37615682-37615682	not_differential	FALSE
OCR_102094	chr22	37615574	37615882	RP5-1170K4.7	ENSG00000231467.2	HiC_0hr_4kb:HiC_8hr_4kb	rs4820272	0.7446	chr22	37615614	0.106125	1.0545	0.00116011	rs2284033	0.851809	JIA	chr22:37615614-37615614	not_differential	FALSE
OCR_102094	chr22	37615574	37615882	RP5-1170K4.7	ENSG00000231467.2	HiC_0hr_4kb:HiC_8hr_4kb	rs4820273	0.8047	chr22	37615682	0.061142	1.03104	0.00113431	rs2284033	0.89658	JIA	chr22:37615682-37615682	not_differential	FALSE
OCR_102095	chr22	37618705	37619040	C1QTNF6	ENSG00000133466.9	HiC_0hr_4kb	rs933223	0.7593	chr22	37618834	0.093881	1.04806	0.00115303	rs2284033	0.862216	JIA	chr22:37618834-37618834	4	FALSE
OCR_102095	chr22	37618705	37619040	C1QTNF6	ENSG00000133466.9	HiC_0hr_4kb	rs9607429	0.7689	chr22	37618933	0.0863267	1.04411	0.00114869	rs2284033	0.872574	JIA	chr22:37618933-37618933	4	FALSE
OCR_102095	chr22	37618705	37619040	C1QTNF6	ENSG00000133466.9	HiC_0hr_4kb	rs5756568	0.7563	chr22	37618938	0.0963129	1.04933	0.00115444	rs2284033	0.859909	JIA	chr22:37618938-37618938	4	FALSE
OCR_102095	chr22	37618705	37619040	C1QTNF6	ENSG00000133466.9	HiC_0hr_4kb	rs9610671	0.7565	chr22	37619000	0.0961497	1.04925	0.00115434	rs2284033	0.861063	JIA	chr22:37619000-37619000	4	FALSE
OCR_102095	chr22	37618705	37619040	MFNG	ENSG00000100060.13	HiC_0hr_4kb	rs933223	0.7593	chr22	37618834	0.093881	1.04806	0.00115303	rs2284033	0.862216	JIA	chr22:37618834-37618834	5	FALSE
OCR_102095	chr22	37618705	37619040	MFNG	ENSG00000100060.13	HiC_0hr_4kb	rs9607429	0.7689	chr22	37618933	0.0863267	1.04411	0.00114869	rs2284033	0.872574	JIA	chr22:37618933-37618933	5	FALSE
OCR_102095	chr22	37618705	37619040	MFNG	ENSG00000100060.13	HiC_0hr_4kb	rs5756568	0.7563	chr22	37618938	0.0963129	1.04933	0.00115444	rs2284033	0.859909	JIA	chr22:37618938-37618938	5	FALSE
OCR_102095	chr22	37618705	37619040	MFNG	ENSG00000100060.13	HiC_0hr_4kb	rs9610671	0.7565	chr22	37619000	0.0961497	1.04925	0.00115434	rs2284033	0.861063	JIA	chr22:37619000-37619000	5	FALSE
OCR_102095	chr22	37618705	37619040	RAC2	ENSG00000128340.10	HiC_0hr_2kb:HiC_0hr_4kb:HiC_8hr_4kb	rs933223	0.7593	chr22	37618834	0.093881	1.04806	0.00115303	rs2284033	0.862216	JIA	chr22:37618834-37618834	5	FALSE
OCR_102095	chr22	37618705	37619040	RAC2	ENSG00000128340.10	HiC_0hr_2kb:HiC_0hr_4kb:HiC_8hr_4kb	rs9607429	0.7689	chr22	37618933	0.0863267	1.04411	0.00114869	rs2284033	0.872574	JIA	chr22:37618933-37618933	5	FALSE
OCR_102095	chr22	37618705	37619040	RAC2	ENSG00000128340.10	HiC_0hr_2kb:HiC_0hr_4kb:HiC_8hr_4kb	rs5756568	0.7563	chr22	37618938	0.0963129	1.04933	0.00115444	rs2284033	0.859909	JIA	chr22:37618938-37618938	5	FALSE
OCR_102095	chr22	37618705	37619040	RAC2	ENSG00000128340.10	HiC_0hr_2kb:HiC_0hr_4kb:HiC_8hr_4kb	rs9610671	0.7565	chr22	37619000	0.0961497	1.04925	0.00115434	rs2284033	0.861063	JIA	chr22:37619000-37619000	5	FALSE
OCR_102095	chr22	37618705	37619040	RP5-1170K4.7	ENSG00000231467.2	HiC_0hr_4kb:HiC_8hr_4kb	rs933223	0.7593	chr22	37618834	0.093881	1.04806	0.00115303	rs2284033	0.862216	JIA	chr22:37618834-37618834	not_differential	FALSE
OCR_102095	chr22	37618705	37619040	RP5-1170K4.7	ENSG00000231467.2	HiC_0hr_4kb:HiC_8hr_4kb	rs9607429	0.7689	chr22	37618933	0.0863267	1.04411	0.00114869	rs2284033	0.872574	JIA	chr22:37618933-37618933	not_differential	FALSE
OCR_102095	chr22	37618705	37619040	RP5-1170K4.7	ENSG00000231467.2	HiC_0hr_4kb:HiC_8hr_4kb	rs5756568	0.7563	chr22	37618938	0.0963129	1.04933	0.00115444	rs2284033	0.859909	JIA	chr22:37618938-37618938	not_differential	FALSE
OCR_102095	chr22	37618705	37619040	RP5-1170K4.7	ENSG00000231467.2	HiC_0hr_4kb:HiC_8hr_4kb	rs9610671	0.7565	chr22	37619000	0.0961497	1.04925	0.00115434	rs2284033	0.861063	JIA	chr22:37619000-37619000	not_differential	FALSE
OCR_102095	chr22	37618705	37619040	SSTR3	ENSG00000183473.5	HiC_0hr_4kb:HiC_8hr_4kb	rs933223	0.7593	chr22	37618834	0.093881	1.04806	0.00115303	rs2284033	0.862216	JIA	chr22:37618834-37618834	4	FALSE
OCR_102095	chr22	37618705	37619040	SSTR3	ENSG00000183473.5	HiC_0hr_4kb:HiC_8hr_4kb	rs9607429	0.7689	chr22	37618933	0.0863267	1.04411	0.00114869	rs2284033	0.872574	JIA	chr22:37618933-37618933	4	FALSE
OCR_102095	chr22	37618705	37619040	SSTR3	ENSG00000183473.5	HiC_0hr_4kb:HiC_8hr_4kb	rs5756568	0.7563	chr22	37618938	0.0963129	1.04933	0.00115444	rs2284033	0.859909	JIA	chr22:37618938-37618938	4	FALSE
OCR_102095	chr22	37618705	37619040	SSTR3	ENSG00000183473.5	HiC_0hr_4kb:HiC_8hr_4kb	rs9610671	0.7565	chr22	37619000	0.0961497	1.04925	0.00115434	rs2284033	0.861063	JIA	chr22:37619000-37619000	4	FALSE
OCR_102096	chr22	37620054	37620696	MFNG	ENSG00000100060.13	HiC_0hr_4kb	rs5756570	0.7882	chr22	37620432	0.0721721	1.03675	0.00114059	rs2284033	0.889751	JIA	chr22:37620432-37620432	5	FALSE
OCR_102096	chr22	37620054	37620696	MFNG	ENSG00000100060.13	HiC_0hr_4kb	rs9610678	0.8897	chr22	37620472	0.0192332	1.00966	0.00111079	rs2284033	0.938169	JIA	chr22:37620472-37620472	5	FALSE
OCR_102096	chr22	37620054	37620696	MFNG	ENSG00000100060.13	HiC_0hr_4kb	rs9610679	0.7913	chr22	37620533	0.0700253	1.03563	0.00113936	rs2284033	0.89317	JIA	chr22:37620533-37620533	5	FALSE
OCR_102096	chr22	37620054	37620696	RAC2	ENSG00000128340.10	HiC_0hr_2kb:HiC_0hr_4kb	rs5756570	0.7882	chr22	37620432	0.0721721	1.03675	0.00114059	rs2284033	0.889751	JIA	chr22:37620432-37620432	5	FALSE
OCR_102096	chr22	37620054	37620696	RAC2	ENSG00000128340.10	HiC_0hr_2kb:HiC_0hr_4kb	rs9610678	0.8897	chr22	37620472	0.0192332	1.00966	0.00111079	rs2284033	0.938169	JIA	chr22:37620472-37620472	5	FALSE
OCR_102096	chr22	37620054	37620696	RAC2	ENSG00000128340.10	HiC_0hr_2kb:HiC_0hr_4kb	rs9610679	0.7913	chr22	37620533	0.0700253	1.03563	0.00113936	rs2284033	0.89317	JIA	chr22:37620533-37620533	5	FALSE
OCR_102096	chr22	37620054	37620696	RP5-1170K4.7	ENSG00000231467.2	HiC_8hr_4kb	rs5756570	0.7882	chr22	37620432	0.0721721	1.03675	0.00114059	rs2284033	0.889751	JIA	chr22:37620432-37620432	not_differential	FALSE
OCR_102096	chr22	37620054	37620696	RP5-1170K4.7	ENSG00000231467.2	HiC_8hr_4kb	rs9610678	0.8897	chr22	37620472	0.0192332	1.00966	0.00111079	rs2284033	0.938169	JIA	chr22:37620472-37620472	not_differential	FALSE
OCR_102096	chr22	37620054	37620696	RP5-1170K4.7	ENSG00000231467.2	HiC_8hr_4kb	rs9610679	0.7913	chr22	37620533	0.0700253	1.03563	0.00113936	rs2284033	0.89317	JIA	chr22:37620533-37620533	not_differential	FALSE
OCR_102098	chr22	37625406	37625688	C1QTNF6	ENSG00000133466.9	HiC_0hr_4kb	rs739042	0.6834	chr22	37625419	0.166324	1.08672	0.00119556	rs2284033	0.829502	JIA	chr22:37625419-37625419	4	FALSE
OCR_102098	chr22	37625406	37625688	C1QTNF6	ENSG00000133466.9	HiC_0hr_4kb	rs4140870	0.8441	chr22	37625644	0.0386719	1.01952	0.00112164	rs2284033	0.922561	JIA	chr22:37625644-37625644	4	FALSE
OCR_102098	chr22	37625406	37625688	MFNG	ENSG00000100060.13	HiC_0hr_4kb	rs739042	0.6834	chr22	37625419	0.166324	1.08672	0.00119556	rs2284033	0.829502	JIA	chr22:37625419-37625419	5	FALSE
OCR_102098	chr22	37625406	37625688	MFNG	ENSG00000100060.13	HiC_0hr_4kb	rs4140870	0.8441	chr22	37625644	0.0386719	1.01952	0.00112164	rs2284033	0.922561	JIA	chr22:37625644-37625644	5	FALSE
OCR_102098	chr22	37625406	37625688	RAC2	ENSG00000128340.10	HiC_0hr_4kb:HiC_8hr_4kb:HiC_24hr_4kb	rs739042	0.6834	chr22	37625419	0.166324	1.08672	0.00119556	rs2284033	0.829502	JIA	chr22:37625419-37625419	5	FALSE
OCR_102098	chr22	37625406	37625688	RAC2	ENSG00000128340.10	HiC_0hr_4kb:HiC_8hr_4kb:HiC_24hr_4kb	rs4140870	0.8441	chr22	37625644	0.0386719	1.01952	0.00112164	rs2284033	0.922561	JIA	chr22:37625644-37625644	5	FALSE
OCR_102098	chr22	37625406	37625688	RP5-1170K4.7	ENSG00000231467.2	HiC_0hr_4kb:HiC_8hr_4kb	rs739042	0.6834	chr22	37625419	0.166324	1.08672	0.00119556	rs2284033	0.829502	JIA	chr22:37625419-37625419	not_differential	FALSE
OCR_102098	chr22	37625406	37625688	RP5-1170K4.7	ENSG00000231467.2	HiC_0hr_4kb:HiC_8hr_4kb	rs4140870	0.8441	chr22	37625644	0.0386719	1.01952	0.00112164	rs2284033	0.922561	JIA	chr22:37625644-37625644	not_differential	FALSE
OCR_102099	chr22	37625971	37627318	C1QTNF6	ENSG00000133466.9	HiC_0hr_2kb:HiC_0hr_4kb	rs2284037	0.6224	chr22	37626102	0.242509	1.12891	0.00124198	rs2284033	0.818556	JIA	chr22:37626102-37626102	4	FALSE
OCR_102099	chr22	37625971	37627318	C1QTNF6	ENSG00000133466.9	HiC_0hr_2kb:HiC_0hr_4kb	rs56409124	0.2057	chr22	37627019	1.60143	2.22714	0.00245021	rs2284033	0.720475	JIA	chr22:37627019-37627019	4	FALSE
OCR_102099	chr22	37625971	37627318	C1QTNF6	ENSG00000133466.9	HiC_0hr_2kb:HiC_0hr_4kb	rs9610682	0.6476	chr22	37627234	0.208939	1.11012	0.00122131	rs2284033	0.822247	JIA	chr22:37627234-37627234	4	FALSE
OCR_102099	chr22	37625971	37627318	C1QTNF6	ENSG00000133466.9	HiC_0hr_2kb:HiC_0hr_4kb	rs9610682	0.0047	chr22	37627234	7.9914	54.3639	0.00175055	rs3218251	0.872742	RA	chr22:37627234-37627234	4	FALSE
OCR_102099	chr22	37625971	37627318	C1QTNF6	ENSG00000133466.9	HiC_0hr_2kb:HiC_0hr_4kb	rs9610683	0.6147	chr22	37627246	0.253387	1.13507	0.00124876	rs2284033	0.817314	JIA	chr22:37627246-37627246	4	FALSE
OCR_102099	chr22	37625971	37627318	C1QTNF6	ENSG00000133466.9	HiC_0hr_2kb:HiC_0hr_4kb	rs9610683	0.0053	chr22	37627246	7.77412	48.7673	0.00157033	rs3218251	0.889229	RA	chr22:37627246-37627246	4	FALSE
OCR_102099	chr22	37625971	37627318	MFNG	ENSG00000100060.13	HiC_0hr_4kb	rs2284037	0.6224	chr22	37626102	0.242509	1.12891	0.00124198	rs2284033	0.818556	JIA	chr22:37626102-37626102	5	FALSE
OCR_102099	chr22	37625971	37627318	MFNG	ENSG00000100060.13	HiC_0hr_4kb	rs56409124	0.2057	chr22	37627019	1.60143	2.22714	0.00245021	rs2284033	0.720475	JIA	chr22:37627019-37627019	5	FALSE
OCR_102099	chr22	37625971	37627318	MFNG	ENSG00000100060.13	HiC_0hr_4kb	rs9610682	0.6476	chr22	37627234	0.208939	1.11012	0.00122131	rs2284033	0.822247	JIA	chr22:37627234-37627234	5	FALSE
OCR_102099	chr22	37625971	37627318	MFNG	ENSG00000100060.13	HiC_0hr_4kb	rs9610682	0.0047	chr22	37627234	7.9914	54.3639	0.00175055	rs3218251	0.872742	RA	chr22:37627234-37627234	5	FALSE
OCR_102099	chr22	37625971	37627318	MFNG	ENSG00000100060.13	HiC_0hr_4kb	rs9610683	0.6147	chr22	37627246	0.253387	1.13507	0.00124876	rs2284033	0.817314	JIA	chr22:37627246-37627246	5	FALSE
OCR_102099	chr22	37625971	37627318	MFNG	ENSG00000100060.13	HiC_0hr_4kb	rs9610683	0.0053	chr22	37627246	7.77412	48.7673	0.00157033	rs3218251	0.889229	RA	chr22:37627246-37627246	5	FALSE
OCR_102099	chr22	37625971	37627318	RAC2	ENSG00000128340.10	HiC_0hr_4kb:HiC_8hr_4kb:HiC_24hr_4kb	rs2284037	0.6224	chr22	37626102	0.242509	1.12891	0.00124198	rs2284033	0.818556	JIA	chr22:37626102-37626102	5	FALSE
OCR_102099	chr22	37625971	37627318	RAC2	ENSG00000128340.10	HiC_0hr_4kb:HiC_8hr_4kb:HiC_24hr_4kb	rs56409124	0.2057	chr22	37627019	1.60143	2.22714	0.00245021	rs2284033	0.720475	JIA	chr22:37627019-37627019	5	FALSE
OCR_102099	chr22	37625971	37627318	RAC2	ENSG00000128340.10	HiC_0hr_4kb:HiC_8hr_4kb:HiC_24hr_4kb	rs9610682	0.6476	chr22	37627234	0.208939	1.11012	0.00122131	rs2284033	0.822247	JIA	chr22:37627234-37627234	5	FALSE
OCR_102099	chr22	37625971	37627318	RAC2	ENSG00000128340.10	HiC_0hr_4kb:HiC_8hr_4kb:HiC_24hr_4kb	rs9610682	0.0047	chr22	37627234	7.9914	54.3639	0.00175055	rs3218251	0.872742	RA	chr22:37627234-37627234	5	FALSE
OCR_102099	chr22	37625971	37627318	RAC2	ENSG00000128340.10	HiC_0hr_4kb:HiC_8hr_4kb:HiC_24hr_4kb	rs9610683	0.6147	chr22	37627246	0.253387	1.13507	0.00124876	rs2284033	0.817314	JIA	chr22:37627246-37627246	5	FALSE
OCR_102099	chr22	37625971	37627318	RAC2	ENSG00000128340.10	HiC_0hr_4kb:HiC_8hr_4kb:HiC_24hr_4kb	rs9610683	0.0053	chr22	37627246	7.77412	48.7673	0.00157033	rs3218251	0.889229	RA	chr22:37627246-37627246	5	FALSE
OCR_102099	chr22	37625971	37627318	RP5-1170K4.7	ENSG00000231467.2	HiC_0hr_4kb:HiC_8hr_4kb	rs2284037	0.6224	chr22	37626102	0.242509	1.12891	0.00124198	rs2284033	0.818556	JIA	chr22:37626102-37626102	not_differential	FALSE
OCR_102099	chr22	37625971	37627318	RP5-1170K4.7	ENSG00000231467.2	HiC_0hr_4kb:HiC_8hr_4kb	rs56409124	0.2057	chr22	37627019	1.60143	2.22714	0.00245021	rs2284033	0.720475	JIA	chr22:37627019-37627019	not_differential	FALSE
OCR_102099	chr22	37625971	37627318	RP5-1170K4.7	ENSG00000231467.2	HiC_0hr_4kb:HiC_8hr_4kb	rs9610682	0.6476	chr22	37627234	0.208939	1.11012	0.00122131	rs2284033	0.822247	JIA	chr22:37627234-37627234	not_differential	FALSE
OCR_102099	chr22	37625971	37627318	RP5-1170K4.7	ENSG00000231467.2	HiC_0hr_4kb:HiC_8hr_4kb	rs9610682	0.0047	chr22	37627234	7.9914	54.3639	0.00175055	rs3218251	0.872742	RA	chr22:37627234-37627234	not_differential	FALSE
OCR_102099	chr22	37625971	37627318	RP5-1170K4.7	ENSG00000231467.2	HiC_0hr_4kb:HiC_8hr_4kb	rs9610683	0.6147	chr22	37627246	0.253387	1.13507	0.00124876	rs2284033	0.817314	JIA	chr22:37627246-37627246	not_differential	FALSE
OCR_102099	chr22	37625971	37627318	RP5-1170K4.7	ENSG00000231467.2	HiC_0hr_4kb:HiC_8hr_4kb	rs9610683	0.0053	chr22	37627246	7.77412	48.7673	0.00157033	rs3218251	0.889229	RA	chr22:37627246-37627246	not_differential	FALSE
OCR_102100	chr22	37627442	37627880	C1QTNF6	ENSG00000133466.9	HiC_0hr_2kb:HiC_0hr_4kb	rs8135343	0.7345	chr22	37627845	0.11502	1.0592	0.00116528	rs2284033	0.843674	JIA	chr22:37627845-37627845	4	FALSE
OCR_102100	chr22	37627442	37627880	C1QTNF6	ENSG00000133466.9	HiC_0hr_2kb:HiC_0hr_4kb	rs8135343	0.0039	chr22	37627845	8.3298	64.3862	0.00207327	rs3218251	0.860162	RA	chr22:37627845-37627845	4	FALSE
OCR_102100	chr22	37627442	37627880	MFNG	ENSG00000100060.13	HiC_0hr_4kb	rs8135343	0.7345	chr22	37627845	0.11502	1.0592	0.00116528	rs2284033	0.843674	JIA	chr22:37627845-37627845	5	FALSE
OCR_102100	chr22	37627442	37627880	MFNG	ENSG00000100060.13	HiC_0hr_4kb	rs8135343	0.0039	chr22	37627845	8.3298	64.3862	0.00207327	rs3218251	0.860162	RA	chr22:37627845-37627845	5	FALSE
OCR_102100	chr22	37627442	37627880	RAC2	ENSG00000128340.10	HiC_0hr_4kb:HiC_8hr_4kb:HiC_24hr_4kb	rs8135343	0.7345	chr22	37627845	0.11502	1.0592	0.00116528	rs2284033	0.843674	JIA	chr22:37627845-37627845	5	FALSE
OCR_102100	chr22	37627442	37627880	RAC2	ENSG00000128340.10	HiC_0hr_4kb:HiC_8hr_4kb:HiC_24hr_4kb	rs8135343	0.0039	chr22	37627845	8.3298	64.3862	0.00207327	rs3218251	0.860162	RA	chr22:37627845-37627845	5	FALSE
OCR_102100	chr22	37627442	37627880	RP5-1170K4.7	ENSG00000231467.2	HiC_0hr_4kb:HiC_8hr_4kb	rs8135343	0.7345	chr22	37627845	0.11502	1.0592	0.00116528	rs2284033	0.843674	JIA	chr22:37627845-37627845	not_differential	FALSE
OCR_102100	chr22	37627442	37627880	RP5-1170K4.7	ENSG00000231467.2	HiC_0hr_4kb:HiC_8hr_4kb	rs8135343	0.0039	chr22	37627845	8.3298	64.3862	0.00207327	rs3218251	0.860162	RA	chr22:37627845-37627845	not_differential	FALSE
OCR_10213	chr1	167423943	167425856	CD247	ENSG00000198821.6	HiC_0hr_4kb:HiC_0hr_1kb:HiC_0hr_2kb:HiC_8hr_2kb:HiC_8hr_4kb:HiC_24hr_4kb	rs2949661	1.039e-10	chr1	167424924	41.7467	1.1619e+09	0.0275705	rs2988277	0.823388	ALG	chr1:167424924-167424924	4	FALSE
OCR_10213	chr1	167423943	167425856	RCSD1	ENSG00000198771.6	HiC_0hr_4kb	rs2949661	1.039e-10	chr1	167424924	41.7467	1.1619e+09	0.0275705	rs2988277	0.823388	ALG	chr1:167424924-167424924	4	FALSE
OCR_10213	chr1	167423943	167425856	RP11-104L21.3	ENSG00000273160.1	HiC_0hr_2kb	rs2949661	1.039e-10	chr1	167424924	41.7467	1.1619e+09	0.0275705	rs2988277	0.823388	ALG	chr1:167424924-167424924	4	FALSE
OCR_10213	chr1	167423943	167425856	RP3-455J7.4	ENSG00000241666.2	HiC_0hr_4kb	rs2949661	1.039e-10	chr1	167424924	41.7467	1.1619e+09	0.0275705	rs2988277	0.823388	ALG	chr1:167424924-167424924	not_differential	FALSE
OCR_102301	chr22	39706127	39708370	APOBEC3B	ENSG00000179750.11	HiC_0hr_4kb	rs77442041	3.274e-09	chr22	39707223	35.0137	4.00978e+07	0.00754298	rs2413583	0.816066	UC	chr22:39707223-39707223	not_differential	FALSE
OCR_102301	chr22	39706127	39708370	APOBEC3B	ENSG00000179750.11	HiC_0hr_4kb	rs5757609	5.664e-09	chr22	39707845	33.9468	2.35208e+07	0.00442461	rs2413583	0.927636	UC	chr22:39707845-39707845	not_differential	FALSE
OCR_102301	chr22	39706127	39708370	APOBEC3B	ENSG00000179750.11	HiC_0hr_4kb	rs5757610	4.632e-09	chr22	39707979	34.3382	2.86052e+07	0.00538107	rs2413583	0.884132	UC	chr22:39707979-39707979	not_differential	FALSE
OCR_102301	chr22	39706127	39708370	APOBEC3B	ENSG00000179750.11	HiC_0hr_4kb	rs5757611	3.754e-09	chr22	39708357	34.7473	3.50977e+07	0.0066024	rs2413583	0.843133	UC	chr22:39708357-39708357	not_differential	FALSE
OCR_102301	chr22	39706127	39708370	APOBEC3C	ENSG00000244509.3	HiC_0hr_4kb	rs77442041	3.274e-09	chr22	39707223	35.0137	4.00978e+07	0.00754298	rs2413583	0.816066	UC	chr22:39707223-39707223	5	FALSE
OCR_102301	chr22	39706127	39708370	APOBEC3C	ENSG00000244509.3	HiC_0hr_4kb	rs5757609	5.664e-09	chr22	39707845	33.9468	2.35208e+07	0.00442461	rs2413583	0.927636	UC	chr22:39707845-39707845	5	FALSE
OCR_102301	chr22	39706127	39708370	APOBEC3C	ENSG00000244509.3	HiC_0hr_4kb	rs5757610	4.632e-09	chr22	39707979	34.3382	2.86052e+07	0.00538107	rs2413583	0.884132	UC	chr22:39707979-39707979	5	FALSE
OCR_102301	chr22	39706127	39708370	APOBEC3C	ENSG00000244509.3	HiC_0hr_4kb	rs5757611	3.754e-09	chr22	39708357	34.7473	3.50977e+07	0.0066024	rs2413583	0.843133	UC	chr22:39708357-39708357	5	FALSE
OCR_102301	chr22	39706127	39708370	APOBEC3D	ENSG00000243811.3	HiC_0hr_4kb	rs77442041	3.274e-09	chr22	39707223	35.0137	4.00978e+07	0.00754298	rs2413583	0.816066	UC	chr22:39707223-39707223	5	FALSE
OCR_102301	chr22	39706127	39708370	APOBEC3D	ENSG00000243811.3	HiC_0hr_4kb	rs5757609	5.664e-09	chr22	39707845	33.9468	2.35208e+07	0.00442461	rs2413583	0.927636	UC	chr22:39707845-39707845	5	FALSE
OCR_102301	chr22	39706127	39708370	APOBEC3D	ENSG00000243811.3	HiC_0hr_4kb	rs5757610	4.632e-09	chr22	39707979	34.3382	2.86052e+07	0.00538107	rs2413583	0.884132	UC	chr22:39707979-39707979	5	FALSE
OCR_102301	chr22	39706127	39708370	APOBEC3D	ENSG00000243811.3	HiC_0hr_4kb	rs5757611	3.754e-09	chr22	39708357	34.7473	3.50977e+07	0.0066024	rs2413583	0.843133	UC	chr22:39708357-39708357	5	FALSE
OCR_102301	chr22	39706127	39708370	CBX6	ENSG00000183741.7	HiC_0hr_4kb:HiC_8hr_4kb	rs77442041	3.274e-09	chr22	39707223	35.0137	4.00978e+07	0.00754298	rs2413583	0.816066	UC	chr22:39707223-39707223	3	FALSE
OCR_102301	chr22	39706127	39708370	CBX6	ENSG00000183741.7	HiC_0hr_4kb:HiC_8hr_4kb	rs5757609	5.664e-09	chr22	39707845	33.9468	2.35208e+07	0.00442461	rs2413583	0.927636	UC	chr22:39707845-39707845	3	FALSE
OCR_102301	chr22	39706127	39708370	CBX6	ENSG00000183741.7	HiC_0hr_4kb:HiC_8hr_4kb	rs5757610	4.632e-09	chr22	39707979	34.3382	2.86052e+07	0.00538107	rs2413583	0.884132	UC	chr22:39707979-39707979	3	FALSE
OCR_102301	chr22	39706127	39708370	CBX6	ENSG00000183741.7	HiC_0hr_4kb:HiC_8hr_4kb	rs5757611	3.754e-09	chr22	39708357	34.7473	3.50977e+07	0.0066024	rs2413583	0.843133	UC	chr22:39708357-39708357	3	FALSE
OCR_102301	chr22	39706127	39708370	CBX7	ENSG00000100307.8	HiC_0hr_2kb:HiC_0hr_4kb:HiC_8hr_4kb:HiC_24hr_4kb	rs77442041	3.274e-09	chr22	39707223	35.0137	4.00978e+07	0.00754298	rs2413583	0.816066	UC	chr22:39707223-39707223	4	FALSE
OCR_102301	chr22	39706127	39708370	CBX7	ENSG00000100307.8	HiC_0hr_2kb:HiC_0hr_4kb:HiC_8hr_4kb:HiC_24hr_4kb	rs5757609	5.664e-09	chr22	39707845	33.9468	2.35208e+07	0.00442461	rs2413583	0.927636	UC	chr22:39707845-39707845	4	FALSE
OCR_102301	chr22	39706127	39708370	CBX7	ENSG00000100307.8	HiC_0hr_2kb:HiC_0hr_4kb:HiC_8hr_4kb:HiC_24hr_4kb	rs5757610	4.632e-09	chr22	39707979	34.3382	2.86052e+07	0.00538107	rs2413583	0.884132	UC	chr22:39707979-39707979	4	FALSE
OCR_102301	chr22	39706127	39708370	CBX7	ENSG00000100307.8	HiC_0hr_2kb:HiC_0hr_4kb:HiC_8hr_4kb:HiC_24hr_4kb	rs5757611	3.754e-09	chr22	39708357	34.7473	3.50977e+07	0.0066024	rs2413583	0.843133	UC	chr22:39708357-39708357	4	FALSE
OCR_102301	chr22	39706127	39708370	PDGFB	ENSG00000100311.12	HiC_0hr_4kb	rs77442041	3.274e-09	chr22	39707223	35.0137	4.00978e+07	0.00754298	rs2413583	0.816066	UC	chr22:39707223-39707223	4	FALSE
OCR_102301	chr22	39706127	39708370	PDGFB	ENSG00000100311.12	HiC_0hr_4kb	rs5757609	5.664e-09	chr22	39707845	33.9468	2.35208e+07	0.00442461	rs2413583	0.927636	UC	chr22:39707845-39707845	4	FALSE
OCR_102301	chr22	39706127	39708370	PDGFB	ENSG00000100311.12	HiC_0hr_4kb	rs5757610	4.632e-09	chr22	39707979	34.3382	2.86052e+07	0.00538107	rs2413583	0.884132	UC	chr22:39707979-39707979	4	FALSE
OCR_102301	chr22	39706127	39708370	PDGFB	ENSG00000100311.12	HiC_0hr_4kb	rs5757611	3.754e-09	chr22	39708357	34.7473	3.50977e+07	0.0066024	rs2413583	0.843133	UC	chr22:39708357-39708357	4	FALSE
OCR_102524	chr22	41777047	41778566	ACO2	ENSG00000100412.11	HiC_24hr_4kb	rs2234052	3.208e-10	chr22	41777241	39.5437	3.86193e+08	0.00208583	rs5758343	0.949234	ALG	chr22:41777241-41777241	3	FALSE
OCR_102524	chr22	41777047	41778566	ACO2	ENSG00000100412.11	HiC_24hr_4kb	rs2234052	1.51e-11	chr22	41777241	45.5211	7.66992e+09	0.00440972	rs9611565	0.822663	VIT	chr22:41777241-41777241	3	FALSE
OCR_102524	chr22	41777047	41778566	ACO2	ENSG00000100412.11	HiC_24hr_4kb	rs2234053	2.509e-10	chr22	41777315	40.0237	4.90949e+08	0.00265161	rs5758343	0.928203	ALG	chr22:41777315-41777315	3	FALSE
OCR_102524	chr22	41777047	41778566	ACO2	ENSG00000100412.11	HiC_24hr_4kb	rs2234053	6.85e-12	chr22	41777315	47.0699	1.66378e+10	0.0095657	rs9611565	0.792033	VIT	chr22:41777315-41777315	3	FALSE
OCR_102524	chr22	41777047	41778566	ACO2	ENSG00000100412.11	HiC_24hr_4kb	rs9607799	3.13e-10	chr22	41777558	39.5918	3.95588e+08	0.00213657	rs5758343	0.947148	ALG	chr22:41777558-41777558	3	FALSE
OCR_102524	chr22	41777047	41778566	ACO2	ENSG00000100412.11	HiC_24hr_4kb	rs9607799	1.51e-11	chr22	41777558	45.5211	7.66992e+09	0.00440972	rs9611565	0.827072	VIT	chr22:41777558-41777558	3	FALSE
OCR_102524	chr22	41777047	41778566	ACO2	ENSG00000100412.11	HiC_24hr_4kb	rs2234058	5.44e-12	chr22	41777883	47.5216	2.08542e+10	0.0119899	rs9611565	0.714998	VIT	chr22:41777883-41777883	3	FALSE
OCR_102524	chr22	41777047	41778566	ACO2	ENSG00000100412.11	HiC_24hr_4kb	rs2234059	5.44e-12	chr22	41777913	47.5216	2.08542e+10	0.0119899	rs9611565	0.726988	VIT	chr22:41777913-41777913	3	FALSE
OCR_102524	chr22	41777047	41778566	POLR3H	ENSG00000100413.12	HiC_0hr_4kb	rs2234052	3.208e-10	chr22	41777241	39.5437	3.86193e+08	0.00208583	rs5758343	0.949234	ALG	chr22:41777241-41777241	1	FALSE
OCR_102524	chr22	41777047	41778566	POLR3H	ENSG00000100413.12	HiC_0hr_4kb	rs2234052	1.51e-11	chr22	41777241	45.5211	7.66992e+09	0.00440972	rs9611565	0.822663	VIT	chr22:41777241-41777241	1	FALSE
OCR_102524	chr22	41777047	41778566	POLR3H	ENSG00000100413.12	HiC_0hr_4kb	rs2234053	2.509e-10	chr22	41777315	40.0237	4.90949e+08	0.00265161	rs5758343	0.928203	ALG	chr22:41777315-41777315	1	FALSE
OCR_102524	chr22	41777047	41778566	POLR3H	ENSG00000100413.12	HiC_0hr_4kb	rs2234053	6.85e-12	chr22	41777315	47.0699	1.66378e+10	0.0095657	rs9611565	0.792033	VIT	chr22:41777315-41777315	1	FALSE
OCR_102524	chr22	41777047	41778566	POLR3H	ENSG00000100413.12	HiC_0hr_4kb	rs9607799	3.13e-10	chr22	41777558	39.5918	3.95588e+08	0.00213657	rs5758343	0.947148	ALG	chr22:41777558-41777558	1	FALSE
OCR_102524	chr22	41777047	41778566	POLR3H	ENSG00000100413.12	HiC_0hr_4kb	rs9607799	1.51e-11	chr22	41777558	45.5211	7.66992e+09	0.00440972	rs9611565	0.827072	VIT	chr22:41777558-41777558	1	FALSE
OCR_102524	chr22	41777047	41778566	POLR3H	ENSG00000100413.12	HiC_0hr_4kb	rs2234058	5.44e-12	chr22	41777883	47.5216	2.08542e+10	0.0119899	rs9611565	0.714998	VIT	chr22:41777883-41777883	1	FALSE
OCR_102524	chr22	41777047	41778566	POLR3H	ENSG00000100413.12	HiC_0hr_4kb	rs2234059	5.44e-12	chr22	41777913	47.5216	2.08542e+10	0.0119899	rs9611565	0.726988	VIT	chr22:41777913-41777913	1	FALSE
OCR_102524	chr22	41777047	41778566	TOB2	ENSG00000183864.4	HiC_0hr_4kb	rs2234052	3.208e-10	chr22	41777241	39.5437	3.86193e+08	0.00208583	rs5758343	0.949234	ALG	chr22:41777241-41777241	3	FALSE
OCR_102524	chr22	41777047	41778566	TOB2	ENSG00000183864.4	HiC_0hr_4kb	rs2234052	1.51e-11	chr22	41777241	45.5211	7.66992e+09	0.00440972	rs9611565	0.822663	VIT	chr22:41777241-41777241	3	FALSE
OCR_102524	chr22	41777047	41778566	TOB2	ENSG00000183864.4	HiC_0hr_4kb	rs2234053	2.509e-10	chr22	41777315	40.0237	4.90949e+08	0.00265161	rs5758343	0.928203	ALG	chr22:41777315-41777315	3	FALSE
OCR_102524	chr22	41777047	41778566	TOB2	ENSG00000183864.4	HiC_0hr_4kb	rs2234053	6.85e-12	chr22	41777315	47.0699	1.66378e+10	0.0095657	rs9611565	0.792033	VIT	chr22:41777315-41777315	3	FALSE
OCR_102524	chr22	41777047	41778566	TOB2	ENSG00000183864.4	HiC_0hr_4kb	rs9607799	3.13e-10	chr22	41777558	39.5918	3.95588e+08	0.00213657	rs5758343	0.947148	ALG	chr22:41777558-41777558	3	FALSE
OCR_102524	chr22	41777047	41778566	TOB2	ENSG00000183864.4	HiC_0hr_4kb	rs9607799	1.51e-11	chr22	41777558	45.5211	7.66992e+09	0.00440972	rs9611565	0.827072	VIT	chr22:41777558-41777558	3	FALSE
OCR_102524	chr22	41777047	41778566	TOB2	ENSG00000183864.4	HiC_0hr_4kb	rs2234058	5.44e-12	chr22	41777883	47.5216	2.08542e+10	0.0119899	rs9611565	0.714998	VIT	chr22:41777883-41777883	3	FALSE
OCR_102524	chr22	41777047	41778566	TOB2	ENSG00000183864.4	HiC_0hr_4kb	rs2234059	5.44e-12	chr22	41777913	47.5216	2.08542e+10	0.0119899	rs9611565	0.726988	VIT	chr22:41777913-41777913	3	FALSE
OCR_102526	chr22	41801657	41801956	ACO2	ENSG00000100412.11	HiC_0hr_2kb:HiC_0hr_4kb:HiC_8hr_2kb:HiC_8hr_4kb:HiC_24hr_2kb:HiC_24hr_4kb	rs132908	6.61e-11	chr22	41801795	42.6311	1.80811e+09	0.00103955	rs9611565	0.927312	VIT	chr22:41801795-41801795	3	FALSE
OCR_102526	chr22	41801657	41801956	PHF5A	ENSG00000100410.3	HiC_0hr_4kb:HiC_8hr_4kb	rs132908	6.61e-11	chr22	41801795	42.6311	1.80811e+09	0.00103955	rs9611565	0.927312	VIT	chr22:41801795-41801795	3	FALSE
OCR_102526	chr22	41801657	41801956	PMM1	ENSG00000100417.7	HiC_0hr_4kb	rs132908	6.61e-11	chr22	41801795	42.6311	1.80811e+09	0.00103955	rs9611565	0.927312	VIT	chr22:41801795-41801795	not_differential	FALSE
OCR_102526	chr22	41801657	41801956	POLR3H	ENSG00000100413.12	HiC_0hr_4kb:HiC_8hr_4kb:HiC_24hr_4kb	rs132908	6.61e-11	chr22	41801795	42.6311	1.80811e+09	0.00103955	rs9611565	0.927312	VIT	chr22:41801795-41801795	1	FALSE
OCR_102526	chr22	41801657	41801956	TOB2	ENSG00000183864.4	HiC_8hr_4kb	rs132908	6.61e-11	chr22	41801795	42.6311	1.80811e+09	0.00103955	rs9611565	0.927312	VIT	chr22:41801795-41801795	3	FALSE
OCR_102527	chr22	41808857	41810701	ACO2	ENSG00000100412.11	HiC_0hr_4kb:HiC_8hr_4kb:HiC_24hr_4kb	rs202634	9.892e-11	chr22	41809623	41.8427	1.21906e+09	0.00658412	rs5758343	0.744497	ALG	chr22:41809623-41809623	3	FALSE
OCR_102527	chr22	41808857	41810701	ACO2	ENSG00000100412.11	HiC_0hr_4kb:HiC_8hr_4kb:HiC_24hr_4kb	rs202634	6.68e-11	chr22	41809623	42.6105	1.78958e+09	0.0010289	rs9611565	0.928341	VIT	chr22:41809623-41809623	3	FALSE
OCR_102527	chr22	41808857	41810701	ACO2	ENSG00000100412.11	HiC_0hr_4kb:HiC_8hr_4kb:HiC_24hr_4kb	rs202635	6.758e-11	chr22	41809637	42.5878	1.76938e+09	0.00955639	rs5758343	0.644225	ALG	chr22:41809637-41809637	3	FALSE
OCR_102527	chr22	41808857	41810701	ACO2	ENSG00000100412.11	HiC_0hr_4kb:HiC_8hr_4kb:HiC_24hr_4kb	rs132919	2.589e-10	chr22	41809903	39.9624	4.76127e+08	0.00257156	rs5758343	0.933358	ALG	chr22:41809903-41809903	3	FALSE
OCR_102527	chr22	41808857	41810701	ACO2	ENSG00000100412.11	HiC_0hr_4kb:HiC_8hr_4kb:HiC_24hr_4kb	rs132920	1.815e-10	chr22	41810170	40.6563	6.73606e+08	0.00363814	rs5758343	0.887017	ALG	chr22:41810170-41810170	3	FALSE
OCR_102527	chr22	41808857	41810701	PHF5A	ENSG00000100410.3	HiC_0hr_2kb:HiC_0hr_4kb:HiC_8hr_2kb:HiC_8hr_4kb	rs202634	9.892e-11	chr22	41809623	41.8427	1.21906e+09	0.00658412	rs5758343	0.744497	ALG	chr22:41809623-41809623	3	FALSE
OCR_102527	chr22	41808857	41810701	PHF5A	ENSG00000100410.3	HiC_0hr_2kb:HiC_0hr_4kb:HiC_8hr_2kb:HiC_8hr_4kb	rs202634	6.68e-11	chr22	41809623	42.6105	1.78958e+09	0.0010289	rs9611565	0.928341	VIT	chr22:41809623-41809623	3	FALSE
OCR_102527	chr22	41808857	41810701	PHF5A	ENSG00000100410.3	HiC_0hr_2kb:HiC_0hr_4kb:HiC_8hr_2kb:HiC_8hr_4kb	rs202635	6.758e-11	chr22	41809637	42.5878	1.76938e+09	0.00955639	rs5758343	0.644225	ALG	chr22:41809637-41809637	3	FALSE
OCR_102527	chr22	41808857	41810701	PHF5A	ENSG00000100410.3	HiC_0hr_2kb:HiC_0hr_4kb:HiC_8hr_2kb:HiC_8hr_4kb	rs132919	2.589e-10	chr22	41809903	39.9624	4.76127e+08	0.00257156	rs5758343	0.933358	ALG	chr22:41809903-41809903	3	FALSE
OCR_102527	chr22	41808857	41810701	PHF5A	ENSG00000100410.3	HiC_0hr_2kb:HiC_0hr_4kb:HiC_8hr_2kb:HiC_8hr_4kb	rs132920	1.815e-10	chr22	41810170	40.6563	6.73606e+08	0.00363814	rs5758343	0.887017	ALG	chr22:41810170-41810170	3	FALSE
OCR_102527	chr22	41808857	41810701	PMM1	ENSG00000100417.7	HiC_0hr_4kb:HiC_8hr_4kb	rs202634	9.892e-11	chr22	41809623	41.8427	1.21906e+09	0.00658412	rs5758343	0.744497	ALG	chr22:41809623-41809623	not_differential	FALSE
OCR_102527	chr22	41808857	41810701	PMM1	ENSG00000100417.7	HiC_0hr_4kb:HiC_8hr_4kb	rs202634	6.68e-11	chr22	41809623	42.6105	1.78958e+09	0.0010289	rs9611565	0.928341	VIT	chr22:41809623-41809623	not_differential	FALSE
OCR_102527	chr22	41808857	41810701	PMM1	ENSG00000100417.7	HiC_0hr_4kb:HiC_8hr_4kb	rs202635	6.758e-11	chr22	41809637	42.5878	1.76938e+09	0.00955639	rs5758343	0.644225	ALG	chr22:41809637-41809637	not_differential	FALSE
OCR_102527	chr22	41808857	41810701	PMM1	ENSG00000100417.7	HiC_0hr_4kb:HiC_8hr_4kb	rs132919	2.589e-10	chr22	41809903	39.9624	4.76127e+08	0.00257156	rs5758343	0.933358	ALG	chr22:41809903-41809903	not_differential	FALSE
OCR_102527	chr22	41808857	41810701	PMM1	ENSG00000100417.7	HiC_0hr_4kb:HiC_8hr_4kb	rs132920	1.815e-10	chr22	41810170	40.6563	6.73606e+08	0.00363814	rs5758343	0.887017	ALG	chr22:41810170-41810170	not_differential	FALSE
OCR_102527	chr22	41808857	41810701	POLR3H	ENSG00000100413.12	HiC_0hr_2kb:HiC_0hr_4kb:HiC_8hr_4kb:HiC_24hr_4kb	rs202634	9.892e-11	chr22	41809623	41.8427	1.21906e+09	0.00658412	rs5758343	0.744497	ALG	chr22:41809623-41809623	1	FALSE
OCR_102527	chr22	41808857	41810701	POLR3H	ENSG00000100413.12	HiC_0hr_2kb:HiC_0hr_4kb:HiC_8hr_4kb:HiC_24hr_4kb	rs202634	6.68e-11	chr22	41809623	42.6105	1.78958e+09	0.0010289	rs9611565	0.928341	VIT	chr22:41809623-41809623	1	FALSE
OCR_102527	chr22	41808857	41810701	POLR3H	ENSG00000100413.12	HiC_0hr_2kb:HiC_0hr_4kb:HiC_8hr_4kb:HiC_24hr_4kb	rs202635	6.758e-11	chr22	41809637	42.5878	1.76938e+09	0.00955639	rs5758343	0.644225	ALG	chr22:41809637-41809637	1	FALSE
OCR_102527	chr22	41808857	41810701	POLR3H	ENSG00000100413.12	HiC_0hr_2kb:HiC_0hr_4kb:HiC_8hr_4kb:HiC_24hr_4kb	rs132919	2.589e-10	chr22	41809903	39.9624	4.76127e+08	0.00257156	rs5758343	0.933358	ALG	chr22:41809903-41809903	1	FALSE
OCR_102527	chr22	41808857	41810701	POLR3H	ENSG00000100413.12	HiC_0hr_2kb:HiC_0hr_4kb:HiC_8hr_4kb:HiC_24hr_4kb	rs132920	1.815e-10	chr22	41810170	40.6563	6.73606e+08	0.00363814	rs5758343	0.887017	ALG	chr22:41810170-41810170	1	FALSE
OCR_102527	chr22	41808857	41810701	TOB2	ENSG00000183864.4	HiC_0hr_2kb:HiC_0hr_4kb:HiC_8hr_2kb:HiC_8hr_4kb:HiC_24hr_4kb	rs202634	9.892e-11	chr22	41809623	41.8427	1.21906e+09	0.00658412	rs5758343	0.744497	ALG	chr22:41809623-41809623	3	FALSE
OCR_102527	chr22	41808857	41810701	TOB2	ENSG00000183864.4	HiC_0hr_2kb:HiC_0hr_4kb:HiC_8hr_2kb:HiC_8hr_4kb:HiC_24hr_4kb	rs202634	6.68e-11	chr22	41809623	42.6105	1.78958e+09	0.0010289	rs9611565	0.928341	VIT	chr22:41809623-41809623	3	FALSE
OCR_102527	chr22	41808857	41810701	TOB2	ENSG00000183864.4	HiC_0hr_2kb:HiC_0hr_4kb:HiC_8hr_2kb:HiC_8hr_4kb:HiC_24hr_4kb	rs202635	6.758e-11	chr22	41809637	42.5878	1.76938e+09	0.00955639	rs5758343	0.644225	ALG	chr22:41809637-41809637	3	FALSE
OCR_102527	chr22	41808857	41810701	TOB2	ENSG00000183864.4	HiC_0hr_2kb:HiC_0hr_4kb:HiC_8hr_2kb:HiC_8hr_4kb:HiC_24hr_4kb	rs132919	2.589e-10	chr22	41809903	39.9624	4.76127e+08	0.00257156	rs5758343	0.933358	ALG	chr22:41809903-41809903	3	FALSE
OCR_102527	chr22	41808857	41810701	TOB2	ENSG00000183864.4	HiC_0hr_2kb:HiC_0hr_4kb:HiC_8hr_2kb:HiC_8hr_4kb:HiC_24hr_4kb	rs132920	1.815e-10	chr22	41810170	40.6563	6.73606e+08	0.00363814	rs5758343	0.887017	ALG	chr22:41810170-41810170	3	FALSE
OCR_102529	chr22	41840162	41840783	ACO2	ENSG00000100412.11	HiC_0hr_4kb:HiC_8hr_4kb	rs106860	7.934e-11	chr22	41840407	42.274	1.51246e+09	0.00816879	rs5758343	0.686732	ALG	chr22:41840407-41840407	3	FALSE
OCR_102529	chr22	41840162	41840783	PHF5A	ENSG00000100410.3	HiC_0hr_4kb:HiC_8hr_4kb	rs106860	7.934e-11	chr22	41840407	42.274	1.51246e+09	0.00816879	rs5758343	0.686732	ALG	chr22:41840407-41840407	3	FALSE
OCR_102529	chr22	41840162	41840783	POLR3H	ENSG00000100413.12	HiC_0hr_4kb	rs106860	7.934e-11	chr22	41840407	42.274	1.51246e+09	0.00816879	rs5758343	0.686732	ALG	chr22:41840407-41840407	1	FALSE
OCR_102529	chr22	41840162	41840783	TEF	ENSG00000167074.10	HiC_0hr_4kb	rs106860	7.934e-11	chr22	41840407	42.274	1.51246e+09	0.00816879	rs5758343	0.686732	ALG	chr22:41840407-41840407	not_differential	FALSE
OCR_102532	chr22	41844261	41844814	ACO2	ENSG00000100412.11	HiC_0hr_4kb:HiC_8hr_4kb:HiC_24hr_4kb	rs202657	6.246e-11	chr22	41844786	42.7419	1.91111e+09	0.0103219	rs5758343	0.575136	ALG	chr22:41844786-41844786	3	FALSE
OCR_102532	chr22	41844261	41844814	PHF5A	ENSG00000100410.3	HiC_0hr_4kb	rs202657	6.246e-11	chr22	41844786	42.7419	1.91111e+09	0.0103219	rs5758343	0.575136	ALG	chr22:41844786-41844786	3	FALSE
OCR_103866	chr3	17036726	17036991	PLCL2	ENSG00000154822.11	HiC_0hr_4kb	rs6807144	2.4e-09	chr3	17036875	35.6185	5.42568e+07	0.0108287	rs4452313	0.822031	RA	chr3:17036875-17036875	not_differential	FALSE
OCR_103871	chr3	17064189	17065145	MIR3714	ENSG00000264818.1	HiC_8hr_4kb	rs6776032	1.1e-09	chr3	17064893	37.139	1.16048e+08	0.0231611	rs4452313	0.236657	RA	chr3:17064893-17064893	not_differential	FALSE
OCR_103871	chr3	17064189	17065145	PLCL2	ENSG00000154822.11	HiC_8hr_4kb:HiC_24hr_4kb	rs6776032	1.1e-09	chr3	17064893	37.139	1.16048e+08	0.0231611	rs4452313	0.236657	RA	chr3:17064893-17064893	not_differential	FALSE
OCR_103878	chr3	17081065	17081493	PLCL2	ENSG00000154822.11	HiC_8hr_4kb:HiC_24hr_4kb	rs7617672	1.2e-09	chr3	17081116	36.9694	1.06609e+08	0.0212774	rs4452313	0.449431	RA	chr3:17081116-17081116	not_differential	FALSE
OCR_103879	chr3	17086368	17086763	PLCL2	ENSG00000154822.11	HiC_8hr_4kb	rs35319117	3.1e-09	chr3	17086678	35.12	4.22875e+07	0.00843984	rs4452313	0.867862	RA	chr3:17086678-17086678	not_differential	FALSE
OCR_104013	chr3	18782167	18783288	AC144521.1	ENSG00000228956.4	HiC_0hr_2kb:HiC_0hr_4kb:HiC_8hr_2kb:HiC_8hr_4kb	rs9866257	6.85e-06	chr3	18783097	20.2347	24768.7	0.0542326	rs11719975	0.179639	MS	chr3:18783097-18783097	4	FALSE
OCR_104013	chr3	18782167	18783288	RP11-158G18.1	ENSG00000272477.1	HiC_0hr_4kb:HiC_8hr_4kb:HiC_24hr_4kb	rs9866257	6.85e-06	chr3	18783097	20.2347	24768.7	0.0542326	rs11719975	0.179639	MS	chr3:18783097-18783097	4	FALSE
OCR_104013	chr3	18782167	18783288	RP11-415F23.2	ENSG00000271964.1	HiC_0hr_4kb	rs9866257	6.85e-06	chr3	18783097	20.2347	24768.7	0.0542326	rs11719975	0.179639	MS	chr3:18783097-18783097	4	FALSE
OCR_104013	chr3	18782167	18783288	SATB1	ENSG00000182568.12	HiC_0hr_2kb:HiC_0hr_4kb:HiC_8hr_2kb:HiC_8hr_4kb:HiC_24hr_2kb:HiC_24hr_4kb	rs9866257	6.85e-06	chr3	18783097	20.2347	24768.7	0.0542326	rs11719975	0.179639	MS	chr3:18783097-18783097	4	FALSE
OCR_104013	chr3	18782167	18783288	TBC1D5	ENSG00000131374.10	HiC_0hr_2kb	rs9866257	6.85e-06	chr3	18783097	20.2347	24768.7	0.0542326	rs11719975	0.179639	MS	chr3:18783097-18783097	5	FALSE
OCR_104014	chr3	18785389	18785609	AC144521.1	ENSG00000228956.4	HiC_0hr_4kb:HiC_8hr_4kb	rs11719975	5.39e-06	chr3	18785585	20.6935	31154.9	0.0682154	rs11719975	0.0682154	MS	chr3:18785585-18785585	4	FALSE
OCR_104014	chr3	18785389	18785609	RP11-158G18.1	ENSG00000272477.1	HiC_0hr_4kb:HiC_8hr_4kb:HiC_24hr_4kb	rs11719975	5.39e-06	chr3	18785585	20.6935	31154.9	0.0682154	rs11719975	0.0682154	MS	chr3:18785585-18785585	4	FALSE
OCR_104014	chr3	18785389	18785609	SATB1	ENSG00000182568.12	HiC_0hr_4kb:HiC_8hr_4kb:HiC_24hr_4kb	rs11719975	5.39e-06	chr3	18785585	20.6935	31154.9	0.0682154	rs11719975	0.0682154	MS	chr3:18785585-18785585	4	FALSE
OCR_104015	chr3	18786726	18786877	AC144521.1	ENSG00000228956.4	HiC_0hr_4kb:HiC_8hr_4kb	rs11721211	1.19e-05	chr3	18786871	19.1792	14612.4	0.0319947	rs11719975	0.402989	MS	chr3:18786871-18786871	4	FALSE
OCR_104015	chr3	18786726	18786877	RP11-158G18.1	ENSG00000272477.1	HiC_0hr_4kb:HiC_8hr_4kb:HiC_24hr_4kb	rs11721211	1.19e-05	chr3	18786871	19.1792	14612.4	0.0319947	rs11719975	0.402989	MS	chr3:18786871-18786871	4	FALSE
OCR_104015	chr3	18786726	18786877	SATB1	ENSG00000182568.12	HiC_0hr_4kb:HiC_8hr_4kb:HiC_24hr_4kb	rs11721211	1.19e-05	chr3	18786871	19.1792	14612.4	0.0319947	rs11719975	0.402989	MS	chr3:18786871-18786871	4	FALSE
OCR_104016	chr3	18793811	18794605	AC144521.1	ENSG00000228956.4	HiC_0hr_2kb:HiC_0hr_4kb:HiC_8hr_2kb:HiC_8hr_4kb:HiC_24hr_4kb	rs9859115	1.27e-05	chr3	18794424	19.0551	13732.7	0.0300685	rs11719975	0.433058	MS	chr3:18794424-18794424	4	FALSE
OCR_104016	chr3	18793811	18794605	RP11-158G18.1	ENSG00000272477.1	HiC_0hr_2kb:HiC_0hr_4kb:HiC_8hr_2kb:HiC_8hr_4kb:HiC_24hr_4kb	rs9859115	1.27e-05	chr3	18794424	19.0551	13732.7	0.0300685	rs11719975	0.433058	MS	chr3:18794424-18794424	4	FALSE
OCR_104016	chr3	18793811	18794605	SATB1	ENSG00000182568.12	HiC_0hr_2kb:HiC_0hr_4kb:HiC_8hr_2kb:HiC_8hr_4kb:HiC_24hr_2kb:HiC_24hr_4kb	rs9859115	1.27e-05	chr3	18794424	19.0551	13732.7	0.0300685	rs11719975	0.433058	MS	chr3:18794424-18794424	4	FALSE
OCR_104016	chr3	18793811	18794605	TBC1D5	ENSG00000131374.10	HiC_0hr_2kb:HiC_8hr_2kb	rs9859115	1.27e-05	chr3	18794424	19.0551	13732.7	0.0300685	rs11719975	0.433058	MS	chr3:18794424-18794424	5	FALSE
OCR_104017	chr3	18799279	18799939	AC144521.1	ENSG00000228956.4	HiC_0hr_4kb:HiC_8hr_4kb:HiC_24hr_2kb:HiC_24hr_4kb	rs3923396	1.4e-05	chr3	18799516	18.8691	12513.5	0.0273991	rs11719975	0.576262	MS	chr3:18799516-18799516	4	FALSE
OCR_104017	chr3	18799279	18799939	RP11-158G18.1	ENSG00000272477.1	HiC_0hr_4kb:HiC_8hr_4kb:HiC_24hr_4kb	rs3923396	1.4e-05	chr3	18799516	18.8691	12513.5	0.0273991	rs11719975	0.576262	MS	chr3:18799516-18799516	4	FALSE
OCR_104017	chr3	18799279	18799939	SATB1	ENSG00000182568.12	HiC_0hr_2kb:HiC_0hr_4kb:HiC_8hr_2kb:HiC_8hr_4kb:HiC_24hr_2kb:HiC_24hr_4kb	rs3923396	1.4e-05	chr3	18799516	18.8691	12513.5	0.0273991	rs11719975	0.576262	MS	chr3:18799516-18799516	4	FALSE
OCR_104017	chr3	18799279	18799939	TBC1D5	ENSG00000131374.10	HiC_24hr_2kb	rs3923396	1.4e-05	chr3	18799516	18.8691	12513.5	0.0273991	rs11719975	0.576262	MS	chr3:18799516-18799516	5	FALSE
OCR_104442	chr3	27762626	27764178	AZI2	ENSG00000163512.9	HiC_0hr_1kb:HiC_0hr_2kb:HiC_0hr_4kb:HiC_8hr_1kb:HiC_8hr_2kb:HiC_8hr_4kb:HiC_24hr_2kb:HiC_24hr_4kb	rs12715125	2.4e-08	chr3	27763427	31.1406	5.7822e+06	0.15009	rs3806624	0.338386	RA	chr3:27763427-27763427	not_differential	FALSE
OCR_104442	chr3	27762626	27764178	CMC1	ENSG00000187118.8	HiC_0hr_1kb:HiC_0hr_2kb:HiC_0hr_4kb:HiC_8hr_2kb:HiC_8hr_4kb:HiC_24hr_2kb:HiC_24hr_4kb	rs12715125	2.4e-08	chr3	27763427	31.1406	5.7822e+06	0.15009	rs3806624	0.338386	RA	chr3:27763427-27763427	5	FALSE
OCR_104442	chr3	27762626	27764178	ZCWPW2	ENSG00000206559.3	HiC_0hr_1kb:HiC_0hr_2kb:HiC_0hr_4kb:HiC_8hr_4kb:HiC_24hr_4kb	rs12715125	2.4e-08	chr3	27763427	31.1406	5.7822e+06	0.15009	rs3806624	0.338386	RA	chr3:27763427-27763427	not_differential	FALSE
OCR_104445	chr3	27770739	27772091	AZI2	ENSG00000163512.9	HiC_0hr_2kb:HiC_0hr_4kb:HiC_8hr_2kb:HiC_8hr_4kb:HiC_24hr_2kb:HiC_24hr_4kb	rs1353286	3.4e-08	chr3	27772014	30.4647	4.12403e+06	0.107048	rs3806624	0.589694	RA	chr3:27772014-27772014	not_differential	FALSE
OCR_104445	chr3	27770739	27772091	CMC1	ENSG00000187118.8	HiC_0hr_2kb:HiC_0hr_4kb:HiC_8hr_2kb:HiC_8hr_4kb:HiC_24hr_2kb:HiC_24hr_4kb	rs1353286	3.4e-08	chr3	27772014	30.4647	4.12403e+06	0.107048	rs3806624	0.589694	RA	chr3:27772014-27772014	5	FALSE
OCR_104445	chr3	27770739	27772091	ZCWPW2	ENSG00000206559.3	HiC_0hr_2kb:HiC_0hr_4kb:HiC_8hr_2kb:HiC_8hr_4kb:HiC_24hr_4kb	rs1353286	3.4e-08	chr3	27772014	30.4647	4.12403e+06	0.107048	rs3806624	0.589694	RA	chr3:27772014-27772014	not_differential	FALSE
OCR_104470	chr3	28078451	28078835	EOMES	ENSG00000163508.8	HiC_8hr_4kb	rs1813375	5.75e-18	chr3	28078571	74.6049	1.58581e+16	0.26993	rs1813375	0.26993	MS	chr3:28078571-28078571	2	FALSE
OCR_104828	chr3	33001957	33002621	GLB1	ENSG00000170266.11	HiC_0hr_2kb:HiC_0hr_4kb:HiC_8hr_2kb:HiC_8hr_4kb:HiC_24hr_4kb	rs9917826	4.06e-05	chr3	33002304	16.8431	4544.01	0.0239547	rs4679081	0.815599	MS	chr3:33002304-33002304	5	FALSE
OCR_104832	chr3	33015348	33015804	GLB1	ENSG00000170266.11	HiC_0hr_4kb	rs13314993	6.869e-06	chr3	33015469	20.2294	24703.2	0.858663	rs13314993	0.858663	CEL	chr3:33015469-33015469	5	FALSE
OCR_104835	chr3	33037628	33038322	CCR4	ENSG00000183813.6	HiC_8hr_2kb:HiC_8hr_4kb	rs4678523	1.152e-06	chr3	33037721	23.6558	137020	0.00277829	rs6776757	0.949913	ALG	chr3:33037721-33037721	1	FALSE
OCR_104835	chr3	33037628	33038322	CCR4	ENSG00000183813.6	HiC_8hr_2kb:HiC_8hr_4kb	rs4678524	8.968e-07	chr3	33037752	24.1379	174369	0.00353558	rs6776757	0.921463	ALG	chr3:33037752-33037752	1	FALSE
OCR_104835	chr3	33037628	33038322	CCR4	ENSG00000183813.6	HiC_8hr_2kb:HiC_8hr_4kb	rs12167	6.296e-05	chr3	33038183	16.0115	2998.1	0.104211	rs13314993	0.962874	CEL	chr3:33038183-33038183	1	FALSE
OCR_104835	chr3	33037628	33038322	GLB1	ENSG00000170266.11	HiC_8hr_4kb:HiC_24hr_4kb	rs4678523	1.152e-06	chr3	33037721	23.6558	137020	0.00277829	rs6776757	0.949913	ALG	chr3:33037721-33037721	5	FALSE
OCR_104835	chr3	33037628	33038322	GLB1	ENSG00000170266.11	HiC_8hr_4kb:HiC_24hr_4kb	rs4678524	8.968e-07	chr3	33037752	24.1379	174369	0.00353558	rs6776757	0.921463	ALG	chr3:33037752-33037752	5	FALSE
OCR_104835	chr3	33037628	33038322	GLB1	ENSG00000170266.11	HiC_8hr_4kb:HiC_24hr_4kb	rs12167	6.296e-05	chr3	33038183	16.0115	2998.1	0.104211	rs13314993	0.962874	CEL	chr3:33038183-33038183	5	FALSE
OCR_104842	chr3	33072277	33072698	CCR4	ENSG00000183813.6	HiC_0hr_4kb:HiC_8hr_4kb:HiC_24hr_4kb	rs116135711	1.34e-06	chr3	33072469	23.3649	118475	0.624567	rs4679081	0.624567	MS	chr3:33072469-33072469	1	FALSE
OCR_104842	chr3	33072277	33072698	GLB1	ENSG00000170266.11	HiC_0hr_4kb:HiC_8hr_4kb	rs116135711	1.34e-06	chr3	33072469	23.3649	118475	0.624567	rs4679081	0.624567	MS	chr3:33072469-33072469	5	FALSE
OCR_104856	chr3	33137537	33139129	CCR4	ENSG00000183813.6	HiC_0hr_4kb:HiC_8hr_4kb:HiC_24hr_4kb	rs35744352	5.033e-07	chr3	33139009	25.2511	304238	0.00616888	rs6776757	0.909542	ALG	chr3:33139009-33139009	1	FALSE
OCR_105501	chr3	46340276	46342054	CCR2	ENSG00000121807.5	HiC_24hr_4kb	rs80054040	2.24e-05	chr3	46340285	17.9735	7996.49	0.0873186	rs79893749	0.20216	JIA	chr3:46340285-46340285	not_differential	FALSE
OCR_105501	chr3	46340276	46342054	CCR2	ENSG00000121807.5	HiC_24hr_4kb	rs79629761	2.63e-05	chr3	46340630	17.6681	6864.04	0.0749528	rs79893749	0.277112	JIA	chr3:46340630-46340630	not_differential	FALSE
OCR_105501	chr3	46340276	46342054	CCR5	ENSG00000160791.12	HiC_8hr_4kb:HiC_24hr_4kb	rs80054040	2.24e-05	chr3	46340285	17.9735	7996.49	0.0873186	rs79893749	0.20216	JIA	chr3:46340285-46340285	not_differential	FALSE
OCR_105501	chr3	46340276	46342054	CCR5	ENSG00000160791.12	HiC_8hr_4kb:HiC_24hr_4kb	rs79629761	2.63e-05	chr3	46340630	17.6681	6864.04	0.0749528	rs79893749	0.277112	JIA	chr3:46340630-46340630	not_differential	FALSE
OCR_105888	chr3	53136165	53137252	AC097015.1	ENSG00000252504.2	HiC_24hr_4kb	rs2564961	1.278e-08	chr3	53136461	32.3645	1.06626e+07	0.0705429	rs2581828	0.710606	CRO	chr3:53136461-53136461	not_differential	FALSE
OCR_105888	chr3	53136165	53137252	TMEM110	ENSG00000213533.7	HiC_0hr_4kb	rs2564961	1.278e-08	chr3	53136461	32.3645	1.06626e+07	0.0705429	rs2581828	0.710606	CRO	chr3:53136461-53136461	not_differential	FALSE
OCR_106078	chr3	58222721	58224456	ACOX2	ENSG00000168306.8	HiC_8hr_4kb	rs58433687	1.00861e-05	chr3	58223292	19.495	17111.8	0.000972282	rs180977001	0.872197	SLE	chr3:58223292-58223292	not_differential	FALSE
OCR_106078	chr3	58222721	58224456	ACOX2	ENSG00000168306.8	HiC_8hr_4kb	rs1515461	1.24554e-05	chr3	58223515	19.0922	13989.9	0.000794899	rs180977001	0.903952	SLE	chr3:58223515-58223515	not_differential	FALSE
OCR_106078	chr3	58222721	58224456	ACOX2	ENSG00000168306.8	HiC_8hr_4kb	rs12493829	1.04247e-05	chr3	58223543	19.432	16580.6	0.0009421	rs180977001	0.875993	SLE	chr3:58223543-58223543	not_differential	FALSE
OCR_106078	chr3	58222721	58224456	FLNB	ENSG00000136068.10	HiC_0hr_2kb:HiC_0hr_4kb	rs58433687	1.00861e-05	chr3	58223292	19.495	17111.8	0.000972282	rs180977001	0.872197	SLE	chr3:58223292-58223292	not_differential	FALSE
OCR_106078	chr3	58222721	58224456	FLNB	ENSG00000136068.10	HiC_0hr_2kb:HiC_0hr_4kb	rs1515461	1.24554e-05	chr3	58223515	19.0922	13989.9	0.000794899	rs180977001	0.903952	SLE	chr3:58223515-58223515	not_differential	FALSE
OCR_106078	chr3	58222721	58224456	FLNB	ENSG00000136068.10	HiC_0hr_2kb:HiC_0hr_4kb	rs12493829	1.04247e-05	chr3	58223543	19.432	16580.6	0.0009421	rs180977001	0.875993	SLE	chr3:58223543-58223543	not_differential	FALSE
OCR_106078	chr3	58222721	58224456	KCTD6	ENSG00000168301.8	HiC_0hr_4kb	rs58433687	1.00861e-05	chr3	58223292	19.495	17111.8	0.000972282	rs180977001	0.872197	SLE	chr3:58223292-58223292	not_differential	FALSE
OCR_106078	chr3	58222721	58224456	KCTD6	ENSG00000168301.8	HiC_0hr_4kb	rs1515461	1.24554e-05	chr3	58223515	19.0922	13989.9	0.000794899	rs180977001	0.903952	SLE	chr3:58223515-58223515	not_differential	FALSE
OCR_106078	chr3	58222721	58224456	KCTD6	ENSG00000168301.8	HiC_0hr_4kb	rs12493829	1.04247e-05	chr3	58223543	19.432	16580.6	0.0009421	rs180977001	0.875993	SLE	chr3:58223543-58223543	not_differential	FALSE
OCR_106078	chr3	58222721	58224456	PDHB	ENSG00000168291.8	HiC_0hr_4kb	rs58433687	1.00861e-05	chr3	58223292	19.495	17111.8	0.000972282	rs180977001	0.872197	SLE	chr3:58223292-58223292	5	FALSE
OCR_106078	chr3	58222721	58224456	PDHB	ENSG00000168291.8	HiC_0hr_4kb	rs1515461	1.24554e-05	chr3	58223515	19.0922	13989.9	0.000794899	rs180977001	0.903952	SLE	chr3:58223515-58223515	5	FALSE
OCR_106078	chr3	58222721	58224456	PDHB	ENSG00000168291.8	HiC_0hr_4kb	rs12493829	1.04247e-05	chr3	58223543	19.432	16580.6	0.0009421	rs180977001	0.875993	SLE	chr3:58223543-58223543	5	FALSE
OCR_106078	chr3	58222721	58224456	RP11-359I18.5	ENSG00000272360.1	HiC_0hr_4kb	rs58433687	1.00861e-05	chr3	58223292	19.495	17111.8	0.000972282	rs180977001	0.872197	SLE	chr3:58223292-58223292	not_differential	FALSE
OCR_106078	chr3	58222721	58224456	RP11-359I18.5	ENSG00000272360.1	HiC_0hr_4kb	rs1515461	1.24554e-05	chr3	58223515	19.0922	13989.9	0.000794899	rs180977001	0.903952	SLE	chr3:58223515-58223515	not_differential	FALSE
OCR_106078	chr3	58222721	58224456	RP11-359I18.5	ENSG00000272360.1	HiC_0hr_4kb	rs12493829	1.04247e-05	chr3	58223543	19.432	16580.6	0.0009421	rs180977001	0.875993	SLE	chr3:58223543-58223543	not_differential	FALSE
OCR_106078	chr3	58222721	58224456	RP11-802O23.3	ENSG00000272182.1	HiC_0hr_4kb	rs58433687	1.00861e-05	chr3	58223292	19.495	17111.8	0.000972282	rs180977001	0.872197	SLE	chr3:58223292-58223292	not_differential	FALSE
OCR_106078	chr3	58222721	58224456	RP11-802O23.3	ENSG00000272182.1	HiC_0hr_4kb	rs1515461	1.24554e-05	chr3	58223515	19.0922	13989.9	0.000794899	rs180977001	0.903952	SLE	chr3:58223515-58223515	not_differential	FALSE
OCR_106078	chr3	58222721	58224456	RP11-802O23.3	ENSG00000272182.1	HiC_0hr_4kb	rs12493829	1.04247e-05	chr3	58223543	19.432	16580.6	0.0009421	rs180977001	0.875993	SLE	chr3:58223543-58223543	not_differential	FALSE
OCR_106078	chr3	58222721	58224456	RPP14	ENSG00000163684.7	HiC_0hr_2kb:HiC_0hr_4kb	rs58433687	1.00861e-05	chr3	58223292	19.495	17111.8	0.000972282	rs180977001	0.872197	SLE	chr3:58223292-58223292	not_differential	FALSE
OCR_106078	chr3	58222721	58224456	RPP14	ENSG00000163684.7	HiC_0hr_2kb:HiC_0hr_4kb	rs1515461	1.24554e-05	chr3	58223515	19.0922	13989.9	0.000794899	rs180977001	0.903952	SLE	chr3:58223515-58223515	not_differential	FALSE
OCR_106078	chr3	58222721	58224456	RPP14	ENSG00000163684.7	HiC_0hr_2kb:HiC_0hr_4kb	rs12493829	1.04247e-05	chr3	58223543	19.432	16580.6	0.0009421	rs180977001	0.875993	SLE	chr3:58223543-58223543	not_differential	FALSE
OCR_106084	chr3	58318260	58319571	ACOX2	ENSG00000168306.8	HiC_0hr_4kb	chr3:58318464	8.7e-08	chr3	58318464	28.6436	1.65914e+06	0.221746	rs73081554	0.972664	RA	chr3:58318464-58318464	not_differential	FALSE
OCR_106084	chr3	58318260	58319571	ACOX2	ENSG00000168306.8	HiC_0hr_4kb	rs180977001	4.25626e-08	chr3	58318464	30.029	3.31682e+06	0.18846	rs180977001	0.377117	SLE	chr3:58318464-58318464	not_differential	FALSE
OCR_106084	chr3	58318260	58319571	ACOX2	ENSG00000168306.8	HiC_0hr_4kb	chr3:58318477	5.6e-08	chr3	58318477	29.4971	2.54224e+06	0.339774	rs73081554	0.750917	RA	chr3:58318477-58318477	not_differential	FALSE
OCR_106084	chr3	58318260	58319571	ACOX2	ENSG00000168306.8	HiC_0hr_4kb	rs185407974	4.25167e-08	chr3	58318477	30.0311	3.32029e+06	0.188657	rs180977001	0.188657	SLE	chr3:58318477-58318477	not_differential	FALSE
OCR_106084	chr3	58318260	58319571	KCTD6	ENSG00000168301.8	HiC_0hr_1kb:HiC_0hr_2kb:HiC_0hr_4kb:HiC_8hr_4kb	chr3:58318464	8.7e-08	chr3	58318464	28.6436	1.65914e+06	0.221746	rs73081554	0.972664	RA	chr3:58318464-58318464	not_differential	FALSE
OCR_106084	chr3	58318260	58319571	KCTD6	ENSG00000168301.8	HiC_0hr_1kb:HiC_0hr_2kb:HiC_0hr_4kb:HiC_8hr_4kb	rs180977001	4.25626e-08	chr3	58318464	30.029	3.31682e+06	0.18846	rs180977001	0.377117	SLE	chr3:58318464-58318464	not_differential	FALSE
OCR_106084	chr3	58318260	58319571	KCTD6	ENSG00000168301.8	HiC_0hr_1kb:HiC_0hr_2kb:HiC_0hr_4kb:HiC_8hr_4kb	chr3:58318477	5.6e-08	chr3	58318477	29.4971	2.54224e+06	0.339774	rs73081554	0.750917	RA	chr3:58318477-58318477	not_differential	FALSE
OCR_106084	chr3	58318260	58319571	KCTD6	ENSG00000168301.8	HiC_0hr_1kb:HiC_0hr_2kb:HiC_0hr_4kb:HiC_8hr_4kb	rs185407974	4.25167e-08	chr3	58318477	30.0311	3.32029e+06	0.188657	rs180977001	0.188657	SLE	chr3:58318477-58318477	not_differential	FALSE
OCR_106084	chr3	58318260	58319571	PDHB	ENSG00000168291.8	HiC_0hr_4kb	chr3:58318464	8.7e-08	chr3	58318464	28.6436	1.65914e+06	0.221746	rs73081554	0.972664	RA	chr3:58318464-58318464	5	FALSE
OCR_106084	chr3	58318260	58319571	PDHB	ENSG00000168291.8	HiC_0hr_4kb	rs180977001	4.25626e-08	chr3	58318464	30.029	3.31682e+06	0.18846	rs180977001	0.377117	SLE	chr3:58318464-58318464	5	FALSE
OCR_106084	chr3	58318260	58319571	PDHB	ENSG00000168291.8	HiC_0hr_4kb	chr3:58318477	5.6e-08	chr3	58318477	29.4971	2.54224e+06	0.339774	rs73081554	0.750917	RA	chr3:58318477-58318477	5	FALSE
OCR_106084	chr3	58318260	58319571	PDHB	ENSG00000168291.8	HiC_0hr_4kb	rs185407974	4.25167e-08	chr3	58318477	30.0311	3.32029e+06	0.188657	rs180977001	0.188657	SLE	chr3:58318477-58318477	5	FALSE
OCR_106084	chr3	58318260	58319571	PXK	ENSG00000168297.11	HiC_0hr_4kb:HiC_8hr_4kb:HiC_24hr_4kb	chr3:58318464	8.7e-08	chr3	58318464	28.6436	1.65914e+06	0.221746	rs73081554	0.972664	RA	chr3:58318464-58318464	1	FALSE
OCR_106084	chr3	58318260	58319571	PXK	ENSG00000168297.11	HiC_0hr_4kb:HiC_8hr_4kb:HiC_24hr_4kb	rs180977001	4.25626e-08	chr3	58318464	30.029	3.31682e+06	0.18846	rs180977001	0.377117	SLE	chr3:58318464-58318464	1	FALSE
OCR_106084	chr3	58318260	58319571	PXK	ENSG00000168297.11	HiC_0hr_4kb:HiC_8hr_4kb:HiC_24hr_4kb	chr3:58318477	5.6e-08	chr3	58318477	29.4971	2.54224e+06	0.339774	rs73081554	0.750917	RA	chr3:58318477-58318477	1	FALSE
OCR_106084	chr3	58318260	58319571	PXK	ENSG00000168297.11	HiC_0hr_4kb:HiC_8hr_4kb:HiC_24hr_4kb	rs185407974	4.25167e-08	chr3	58318477	30.0311	3.32029e+06	0.188657	rs180977001	0.188657	SLE	chr3:58318477-58318477	1	FALSE
OCR_106084	chr3	58318260	58319571	RP11-359I18.5	ENSG00000272360.1	HiC_0hr_2kb:HiC_0hr_4kb:HiC_8hr_4kb	chr3:58318464	8.7e-08	chr3	58318464	28.6436	1.65914e+06	0.221746	rs73081554	0.972664	RA	chr3:58318464-58318464	not_differential	FALSE
OCR_106084	chr3	58318260	58319571	RP11-359I18.5	ENSG00000272360.1	HiC_0hr_2kb:HiC_0hr_4kb:HiC_8hr_4kb	rs180977001	4.25626e-08	chr3	58318464	30.029	3.31682e+06	0.18846	rs180977001	0.377117	SLE	chr3:58318464-58318464	not_differential	FALSE
OCR_106084	chr3	58318260	58319571	RP11-359I18.5	ENSG00000272360.1	HiC_0hr_2kb:HiC_0hr_4kb:HiC_8hr_4kb	chr3:58318477	5.6e-08	chr3	58318477	29.4971	2.54224e+06	0.339774	rs73081554	0.750917	RA	chr3:58318477-58318477	not_differential	FALSE
OCR_106084	chr3	58318260	58319571	RP11-359I18.5	ENSG00000272360.1	HiC_0hr_2kb:HiC_0hr_4kb:HiC_8hr_4kb	rs185407974	4.25167e-08	chr3	58318477	30.0311	3.32029e+06	0.188657	rs180977001	0.188657	SLE	chr3:58318477-58318477	not_differential	FALSE
OCR_106084	chr3	58318260	58319571	RP11-802O23.3	ENSG00000272182.1	HiC_0hr_2kb:HiC_0hr_4kb	chr3:58318464	8.7e-08	chr3	58318464	28.6436	1.65914e+06	0.221746	rs73081554	0.972664	RA	chr3:58318464-58318464	not_differential	FALSE
OCR_106084	chr3	58318260	58319571	RP11-802O23.3	ENSG00000272182.1	HiC_0hr_2kb:HiC_0hr_4kb	rs180977001	4.25626e-08	chr3	58318464	30.029	3.31682e+06	0.18846	rs180977001	0.377117	SLE	chr3:58318464-58318464	not_differential	FALSE
OCR_106084	chr3	58318260	58319571	RP11-802O23.3	ENSG00000272182.1	HiC_0hr_2kb:HiC_0hr_4kb	chr3:58318477	5.6e-08	chr3	58318477	29.4971	2.54224e+06	0.339774	rs73081554	0.750917	RA	chr3:58318477-58318477	not_differential	FALSE
OCR_106084	chr3	58318260	58319571	RP11-802O23.3	ENSG00000272182.1	HiC_0hr_2kb:HiC_0hr_4kb	rs185407974	4.25167e-08	chr3	58318477	30.0311	3.32029e+06	0.188657	rs180977001	0.188657	SLE	chr3:58318477-58318477	not_differential	FALSE
OCR_106086	chr3	58400258	58400633	ABHD6	ENSG00000163686.9	HiC_8hr_4kb	rs34449148	1.59085e-05	chr3	58400343	18.6254	11077.9	0.000629442	rs180977001	0.943033	SLE	chr3:58400343-58400343	5	FALSE
OCR_106086	chr3	58400258	58400633	ABHD6	ENSG00000163686.9	HiC_8hr_4kb	rs11705721	4.31872e-06	chr3	58400414	21.1179	38520.9	0.00218874	rs180977001	0.789271	SLE	chr3:58400414-58400414	5	FALSE
OCR_106086	chr3	58400258	58400633	PXK	ENSG00000168297.11	HiC_0hr_4kb:HiC_8hr_4kb:HiC_24hr_4kb	rs34449148	1.59085e-05	chr3	58400343	18.6254	11077.9	0.000629442	rs180977001	0.943033	SLE	chr3:58400343-58400343	1	FALSE
OCR_106086	chr3	58400258	58400633	PXK	ENSG00000168297.11	HiC_0hr_4kb:HiC_8hr_4kb:HiC_24hr_4kb	rs11705721	4.31872e-06	chr3	58400414	21.1179	38520.9	0.00218874	rs180977001	0.789271	SLE	chr3:58400414-58400414	1	FALSE
OCR_106086	chr3	58400258	58400633	RP11-802O23.3	ENSG00000272182.1	HiC_0hr_4kb:HiC_24hr_4kb	rs34449148	1.59085e-05	chr3	58400343	18.6254	11077.9	0.000629442	rs180977001	0.943033	SLE	chr3:58400343-58400343	not_differential	FALSE
OCR_106086	chr3	58400258	58400633	RP11-802O23.3	ENSG00000272182.1	HiC_0hr_4kb:HiC_24hr_4kb	rs11705721	4.31872e-06	chr3	58400414	21.1179	38520.9	0.00218874	rs180977001	0.789271	SLE	chr3:58400414-58400414	not_differential	FALSE
OCR_106086	chr3	58400258	58400633	RP11-80H18.4	ENSG00000273493.1	HiC_0hr_4kb:HiC_8hr_4kb:HiC_24hr_4kb	rs34449148	1.59085e-05	chr3	58400343	18.6254	11077.9	0.000629442	rs180977001	0.943033	SLE	chr3:58400343-58400343	not_differential	FALSE
OCR_106086	chr3	58400258	58400633	RP11-80H18.4	ENSG00000273493.1	HiC_0hr_4kb:HiC_8hr_4kb:HiC_24hr_4kb	rs11705721	4.31872e-06	chr3	58400414	21.1179	38520.9	0.00218874	rs180977001	0.789271	SLE	chr3:58400414-58400414	not_differential	FALSE
OCR_106086	chr3	58400258	58400633	RPP14	ENSG00000163684.7	HiC_0hr_4kb:HiC_8hr_2kb:HiC_8hr_4kb:HiC_24hr_4kb	rs34449148	1.59085e-05	chr3	58400343	18.6254	11077.9	0.000629442	rs180977001	0.943033	SLE	chr3:58400343-58400343	not_differential	FALSE
OCR_106086	chr3	58400258	58400633	RPP14	ENSG00000163684.7	HiC_0hr_4kb:HiC_8hr_2kb:HiC_8hr_4kb:HiC_24hr_4kb	rs11705721	4.31872e-06	chr3	58400414	21.1179	38520.9	0.00218874	rs180977001	0.789271	SLE	chr3:58400414-58400414	not_differential	FALSE
OCR_106086	chr3	58400258	58400633	RPP14	ENSG00000255154.3	HiC_0hr_4kb:HiC_8hr_4kb:HiC_24hr_4kb	rs34449148	1.59085e-05	chr3	58400343	18.6254	11077.9	0.000629442	rs180977001	0.943033	SLE	chr3:58400343-58400343	not_differential	FALSE
OCR_106086	chr3	58400258	58400633	RPP14	ENSG00000255154.3	HiC_0hr_4kb:HiC_8hr_4kb:HiC_24hr_4kb	rs11705721	4.31872e-06	chr3	58400414	21.1179	38520.9	0.00218874	rs180977001	0.789271	SLE	chr3:58400414-58400414	not_differential	FALSE
OCR_10646	chr1	172666648	172667187	FASLG	ENSG00000117560.6	HiC_8hr_4kb	rs12117954	1.28362e-06	chr1	172666821	23.4476	123476	0.033643	rs10798176	0.518879	SLE	chr1:172666821-172666821	1	FALSE
OCR_10646	chr1	172666648	172667187	RNU6-693P	ENSG00000251943.1	HiC_0hr_4kb:HiC_8hr_4kb:HiC_24hr_4kb	rs12117954	1.28362e-06	chr1	172666821	23.4476	123476	0.033643	rs10798176	0.518879	SLE	chr1:172666821-172666821	not_differential	FALSE
OCR_10646	chr1	172666648	172667187	SUCO	ENSG00000094975.9	HiC_0hr_4kb:HiC_8hr_4kb	rs12117954	1.28362e-06	chr1	172666821	23.4476	123476	0.033643	rs10798176	0.518879	SLE	chr1:172666821-172666821	not_differential	FALSE
OCR_10656	chr1	172715152	172715917	CENPL	ENSG00000120334.11	HiC_0hr_2kb:HiC_0hr_4kb:HiC_8hr_4kb:HiC_24hr_4kb	rs78037977	1.64736e-06	chr1	172715702	22.9678	97140.2	0.0264673	rs10798176	0.807873	SLE	chr1:172715702-172715702	5	FALSE
OCR_10656	chr1	172715152	172715917	CENPL	ENSG00000120334.11	HiC_0hr_2kb:HiC_0hr_4kb:HiC_8hr_4kb:HiC_24hr_4kb	rs78037977	1.86e-13	chr1	172715702	54.1474	5.72741e+11	0.988642	rs78037977	0.988642	VIT	chr1:172715702-172715702	5	FALSE
OCR_10656	chr1	172715152	172715917	DARS2	ENSG00000117593.8	HiC_0hr_2kb:HiC_0hr_4kb:HiC_8hr_4kb:HiC_24hr_4kb	rs78037977	1.64736e-06	chr1	172715702	22.9678	97140.2	0.0264673	rs10798176	0.807873	SLE	chr1:172715702-172715702	5	FALSE
OCR_10656	chr1	172715152	172715917	DARS2	ENSG00000117593.8	HiC_0hr_2kb:HiC_0hr_4kb:HiC_8hr_4kb:HiC_24hr_4kb	rs78037977	1.86e-13	chr1	172715702	54.1474	5.72741e+11	0.988642	rs78037977	0.988642	VIT	chr1:172715702-172715702	5	FALSE
OCR_10656	chr1	172715152	172715917	GAS5	ENSG00000234741.3	HiC_0hr_4kb:HiC_8hr_4kb	rs78037977	1.64736e-06	chr1	172715702	22.9678	97140.2	0.0264673	rs10798176	0.807873	SLE	chr1:172715702-172715702	1	FALSE
OCR_10656	chr1	172715152	172715917	GAS5	ENSG00000234741.3	HiC_0hr_4kb:HiC_8hr_4kb	rs78037977	1.86e-13	chr1	172715702	54.1474	5.72741e+11	0.988642	rs78037977	0.988642	VIT	chr1:172715702-172715702	1	FALSE
OCR_10656	chr1	172715152	172715917	GAS5-AS1	ENSG00000270084.1	HiC_0hr_4kb:HiC_8hr_4kb	rs78037977	1.64736e-06	chr1	172715702	22.9678	97140.2	0.0264673	rs10798176	0.807873	SLE	chr1:172715702-172715702	4	FALSE
OCR_10656	chr1	172715152	172715917	GAS5-AS1	ENSG00000270084.1	HiC_0hr_4kb:HiC_8hr_4kb	rs78037977	1.86e-13	chr1	172715702	54.1474	5.72741e+11	0.988642	rs78037977	0.988642	VIT	chr1:172715702-172715702	4	FALSE
OCR_10656	chr1	172715152	172715917	KLHL20	ENSG00000076321.6	HiC_0hr_4kb	rs78037977	1.64736e-06	chr1	172715702	22.9678	97140.2	0.0264673	rs10798176	0.807873	SLE	chr1:172715702-172715702	not_differential	FALSE
OCR_10656	chr1	172715152	172715917	KLHL20	ENSG00000076321.6	HiC_0hr_4kb	rs78037977	1.86e-13	chr1	172715702	54.1474	5.72741e+11	0.988642	rs78037977	0.988642	VIT	chr1:172715702-172715702	not_differential	FALSE
OCR_10656	chr1	172715152	172715917	PRDX6	ENSG00000117592.8	HiC_0hr_4kb:HiC_8hr_4kb	rs78037977	1.64736e-06	chr1	172715702	22.9678	97140.2	0.0264673	rs10798176	0.807873	SLE	chr1:172715702-172715702	5	FALSE
OCR_10656	chr1	172715152	172715917	PRDX6	ENSG00000117592.8	HiC_0hr_4kb:HiC_8hr_4kb	rs78037977	1.86e-13	chr1	172715702	54.1474	5.72741e+11	0.988642	rs78037977	0.988642	VIT	chr1:172715702-172715702	5	FALSE
OCR_10656	chr1	172715152	172715917	RABGAP1L	ENSG00000152061.17	HiC_0hr_4kb:HiC_8hr_4kb	rs78037977	1.64736e-06	chr1	172715702	22.9678	97140.2	0.0264673	rs10798176	0.807873	SLE	chr1:172715702-172715702	not_differential	FALSE
OCR_10656	chr1	172715152	172715917	RABGAP1L	ENSG00000152061.17	HiC_0hr_4kb:HiC_8hr_4kb	rs78037977	1.86e-13	chr1	172715702	54.1474	5.72741e+11	0.988642	rs78037977	0.988642	VIT	chr1:172715702-172715702	not_differential	FALSE
OCR_10656	chr1	172715152	172715917	RC3H1	ENSG00000135870.7	HiC_0hr_4kb:HiC_8hr_4kb	rs78037977	1.64736e-06	chr1	172715702	22.9678	97140.2	0.0264673	rs10798176	0.807873	SLE	chr1:172715702-172715702	3	FALSE
OCR_10656	chr1	172715152	172715917	RC3H1	ENSG00000135870.7	HiC_0hr_4kb:HiC_8hr_4kb	rs78037977	1.86e-13	chr1	172715702	54.1474	5.72741e+11	0.988642	rs78037977	0.988642	VIT	chr1:172715702-172715702	3	FALSE
OCR_10656	chr1	172715152	172715917	RN7SKP160	ENSG00000200674.1	HiC_0hr_4kb	rs78037977	1.64736e-06	chr1	172715702	22.9678	97140.2	0.0264673	rs10798176	0.807873	SLE	chr1:172715702-172715702	not_differential	FALSE
OCR_10656	chr1	172715152	172715917	RN7SKP160	ENSG00000200674.1	HiC_0hr_4kb	rs78037977	1.86e-13	chr1	172715702	54.1474	5.72741e+11	0.988642	rs78037977	0.988642	VIT	chr1:172715702-172715702	not_differential	FALSE
OCR_10656	chr1	172715152	172715917	RP11-296O14.3	ENSG00000203739.3	HiC_0hr_4kb:HiC_8hr_4kb:HiC_24hr_4kb	rs78037977	1.64736e-06	chr1	172715702	22.9678	97140.2	0.0264673	rs10798176	0.807873	SLE	chr1:172715702-172715702	not_differential	FALSE
OCR_10656	chr1	172715152	172715917	RP11-296O14.3	ENSG00000203739.3	HiC_0hr_4kb:HiC_8hr_4kb:HiC_24hr_4kb	rs78037977	1.86e-13	chr1	172715702	54.1474	5.72741e+11	0.988642	rs78037977	0.988642	VIT	chr1:172715702-172715702	not_differential	FALSE
OCR_10656	chr1	172715152	172715917	SNORD78	ENSG00000208317.1	HiC_0hr_4kb:HiC_8hr_4kb	rs78037977	1.64736e-06	chr1	172715702	22.9678	97140.2	0.0264673	rs10798176	0.807873	SLE	chr1:172715702-172715702	not_differential	FALSE
OCR_10656	chr1	172715152	172715917	SNORD78	ENSG00000208317.1	HiC_0hr_4kb:HiC_8hr_4kb	rs78037977	1.86e-13	chr1	172715702	54.1474	5.72741e+11	0.988642	rs78037977	0.988642	VIT	chr1:172715702-172715702	not_differential	FALSE
OCR_10656	chr1	172715152	172715917	snoU13	ENSG00000238872.1	HiC_0hr_4kb	rs78037977	1.64736e-06	chr1	172715702	22.9678	97140.2	0.0264673	rs10798176	0.807873	SLE	chr1:172715702-172715702	not_differential	FALSE
OCR_10656	chr1	172715152	172715917	snoU13	ENSG00000238872.1	HiC_0hr_4kb	rs78037977	1.86e-13	chr1	172715702	54.1474	5.72741e+11	0.988642	rs78037977	0.988642	VIT	chr1:172715702-172715702	not_differential	FALSE
OCR_10656	chr1	172715152	172715917	SUCO	ENSG00000094975.9	HiC_8hr_4kb	rs78037977	1.64736e-06	chr1	172715702	22.9678	97140.2	0.0264673	rs10798176	0.807873	SLE	chr1:172715702-172715702	not_differential	FALSE
OCR_10656	chr1	172715152	172715917	SUCO	ENSG00000094975.9	HiC_8hr_4kb	rs78037977	1.86e-13	chr1	172715702	54.1474	5.72741e+11	0.988642	rs78037977	0.988642	VIT	chr1:172715702-172715702	not_differential	FALSE
OCR_10656	chr1	172715152	172715917	TNFSF4	ENSG00000117586.6	HiC_0hr_2kb:HiC_0hr_4kb:HiC_8hr_2kb:HiC_8hr_4kb:HiC_24hr_2kb:HiC_24hr_4kb	rs78037977	1.64736e-06	chr1	172715702	22.9678	97140.2	0.0264673	rs10798176	0.807873	SLE	chr1:172715702-172715702	not_differential	FALSE
OCR_10656	chr1	172715152	172715917	TNFSF4	ENSG00000117586.6	HiC_0hr_2kb:HiC_0hr_4kb:HiC_8hr_2kb:HiC_8hr_4kb:HiC_24hr_2kb:HiC_24hr_4kb	rs78037977	1.86e-13	chr1	172715702	54.1474	5.72741e+11	0.988642	rs78037977	0.988642	VIT	chr1:172715702-172715702	not_differential	FALSE
OCR_10656	chr1	172715152	172715917	Y_RNA	ENSG00000252357.1	HiC_8hr_4kb	rs78037977	1.64736e-06	chr1	172715702	22.9678	97140.2	0.0264673	rs10798176	0.807873	SLE	chr1:172715702-172715702	not_differential	FALSE
OCR_10656	chr1	172715152	172715917	Y_RNA	ENSG00000252357.1	HiC_8hr_4kb	rs78037977	1.86e-13	chr1	172715702	54.1474	5.72741e+11	0.988642	rs78037977	0.988642	VIT	chr1:172715702-172715702	not_differential	FALSE
OCR_10656	chr1	172715152	172715917	ZBTB37	ENSG00000185278.10	HiC_0hr_4kb:HiC_8hr_4kb	rs78037977	1.64736e-06	chr1	172715702	22.9678	97140.2	0.0264673	rs10798176	0.807873	SLE	chr1:172715702-172715702	not_differential	FALSE
OCR_10656	chr1	172715152	172715917	ZBTB37	ENSG00000185278.10	HiC_0hr_4kb:HiC_8hr_4kb	rs78037977	1.86e-13	chr1	172715702	54.1474	5.72741e+11	0.988642	rs78037977	0.988642	VIT	chr1:172715702-172715702	not_differential	FALSE
OCR_106610	chr3	71199471	71200041	FOXP1	ENSG00000114861.14	HiC_0hr_4kb:HiC_8hr_4kb:HiC_24hr_4kb	rs10865657	9.931e-05	chr3	71199723	15.1498	1948.64	0.0166614	rs2593855	0.877992	CRO	chr3:71199723-71199723	1	FALSE
OCR_106610	chr3	71199471	71200041	FOXP1	ENSG00000114861.14	HiC_0hr_4kb:HiC_8hr_4kb:HiC_24hr_4kb	rs12633797	5.324e-05	chr3	71199965	16.3291	3514.14	0.0300468	rs2593855	0.63837	CRO	chr3:71199965-71199965	1	FALSE
OCR_106610	chr3	71199471	71200041	FOXP1-AS1	ENSG00000244203.2	HiC_0hr_4kb	rs10865657	9.931e-05	chr3	71199723	15.1498	1948.64	0.0166614	rs2593855	0.877992	CRO	chr3:71199723-71199723	not_differential	FALSE
OCR_106610	chr3	71199471	71200041	FOXP1-AS1	ENSG00000244203.2	HiC_0hr_4kb	rs12633797	5.324e-05	chr3	71199965	16.3291	3514.14	0.0300468	rs2593855	0.63837	CRO	chr3:71199965-71199965	not_differential	FALSE
OCR_106610	chr3	71199471	71200041	RP11-154H23.3	ENSG00000270562.1	HiC_0hr_4kb:HiC_8hr_4kb	rs10865657	9.931e-05	chr3	71199723	15.1498	1948.64	0.0166614	rs2593855	0.877992	CRO	chr3:71199723-71199723	1	FALSE
OCR_106610	chr3	71199471	71200041	RP11-154H23.3	ENSG00000270562.1	HiC_0hr_4kb:HiC_8hr_4kb	rs12633797	5.324e-05	chr3	71199965	16.3291	3514.14	0.0300468	rs2593855	0.63837	CRO	chr3:71199965-71199965	1	FALSE
OCR_10664	chr1	172787504	172787813	TNFSF4	ENSG00000117586.6	HiC_0hr_4kb:HiC_8hr_2kb:HiC_8hr_4kb:HiC_24hr_4kb	rs16844989	0.6195	chr1	172787588	0.246571	1.13121	0.000791125	rs7517810	0.836088	UC	chr1:172787588-172787588	not_differential	FALSE
OCR_10665	chr1	172787951	172789077	RP3-395P12.2	ENSG00000226375.1	HiC_8hr_4kb:HiC_24hr_4kb	rs6686744	0.03352	chr1	172788745	4.51902	9.5784	0.00669878	rs7517810	0.435403	UC	chr1:172788745-172788745	not_differential	FALSE
OCR_10665	chr1	172787951	172789077	RP3-395P12.2	ENSG00000226375.1	HiC_8hr_4kb:HiC_24hr_4kb	rs142879199	0.1402	chr1	172789036	2.17576	2.96798	0.0020757	rs7517810	0.617956	UC	chr1:172789036-172789036	not_differential	FALSE
OCR_10665	chr1	172787951	172789077	RP3-471M13.2	ENSG00000224000.1	HiC_8hr_4kb	rs6686744	0.03352	chr1	172788745	4.51902	9.5784	0.00669878	rs7517810	0.435403	UC	chr1:172788745-172788745	not_differential	FALSE
OCR_10665	chr1	172787951	172789077	RP3-471M13.2	ENSG00000224000.1	HiC_8hr_4kb	rs142879199	0.1402	chr1	172789036	2.17576	2.96798	0.0020757	rs7517810	0.617956	UC	chr1:172789036-172789036	not_differential	FALSE
OCR_10665	chr1	172787951	172789077	snoU13	ENSG00000251817.1	HiC_8hr_4kb	rs6686744	0.03352	chr1	172788745	4.51902	9.5784	0.00669878	rs7517810	0.435403	UC	chr1:172788745-172788745	not_differential	FALSE
OCR_10665	chr1	172787951	172789077	snoU13	ENSG00000251817.1	HiC_8hr_4kb	rs142879199	0.1402	chr1	172789036	2.17576	2.96798	0.0020757	rs7517810	0.617956	UC	chr1:172789036-172789036	not_differential	FALSE
OCR_10665	chr1	172787951	172789077	TNFSF4	ENSG00000117586.6	HiC_0hr_4kb:HiC_8hr_2kb:HiC_8hr_4kb:HiC_24hr_4kb	rs6686744	0.03352	chr1	172788745	4.51902	9.5784	0.00669878	rs7517810	0.435403	UC	chr1:172788745-172788745	not_differential	FALSE
OCR_10665	chr1	172787951	172789077	TNFSF4	ENSG00000117586.6	HiC_0hr_4kb:HiC_8hr_2kb:HiC_8hr_4kb:HiC_24hr_4kb	rs142879199	0.1402	chr1	172789036	2.17576	2.96798	0.0020757	rs7517810	0.617956	UC	chr1:172789036-172789036	not_differential	FALSE
OCR_10666	chr1	172795207	172795930	TNFSF18	ENSG00000120337.7	HiC_8hr_4kb	rs12142778	0.162	chr1	172795236	1.95546	2.65841	0.00185919	rs7517810	0.649533	UC	chr1:172795236-172795236	not_differential	FALSE
OCR_10666	chr1	172795207	172795930	TNFSF18	ENSG00000120337.7	HiC_8hr_4kb	rs147879710	0.01283	chr1	172795496	6.1924	22.1138	0.0154656	rs7517810	0.363215	UC	chr1:172795496-172795496	not_differential	FALSE
OCR_10666	chr1	172795207	172795930	TNFSF18	ENSG00000120337.7	HiC_8hr_4kb	rs116170836	0.4231	chr1	172795926	0.641689	1.37829	0.000963926	rs7517810	0.798189	UC	chr1:172795926-172795926	not_differential	FALSE
OCR_10666	chr1	172795207	172795930	TNFSF4	ENSG00000117586.6	HiC_0hr_4kb:HiC_8hr_2kb:HiC_8hr_4kb:HiC_24hr_4kb	rs12142778	0.162	chr1	172795236	1.95546	2.65841	0.00185919	rs7517810	0.649533	UC	chr1:172795236-172795236	not_differential	FALSE
OCR_10666	chr1	172795207	172795930	TNFSF4	ENSG00000117586.6	HiC_0hr_4kb:HiC_8hr_2kb:HiC_8hr_4kb:HiC_24hr_4kb	rs147879710	0.01283	chr1	172795496	6.1924	22.1138	0.0154656	rs7517810	0.363215	UC	chr1:172795496-172795496	not_differential	FALSE
OCR_10666	chr1	172795207	172795930	TNFSF4	ENSG00000117586.6	HiC_0hr_4kb:HiC_8hr_2kb:HiC_8hr_4kb:HiC_24hr_4kb	rs116170836	0.4231	chr1	172795926	0.641689	1.37829	0.000963926	rs7517810	0.798189	UC	chr1:172795926-172795926	not_differential	FALSE
OCR_10667	chr1	172806997	172808320	RP3-395P12.2	ENSG00000226375.1	HiC_8hr_4kb:HiC_24hr_4kb	rs7519046	0.3085	chr1	172807254	1.03709	1.67958	0.00117464	rs7517810	0.754632	UC	chr1:172807254-172807254	not_differential	FALSE
OCR_10667	chr1	172806997	172808320	TNFSF18	ENSG00000120337.7	HiC_8hr_4kb	rs7519046	0.3085	chr1	172807254	1.03709	1.67958	0.00117464	rs7517810	0.754632	UC	chr1:172807254-172807254	not_differential	FALSE
OCR_10667	chr1	172806997	172808320	TNFSF4	ENSG00000117586.6	HiC_0hr_4kb:HiC_8hr_4kb:HiC_24hr_2kb:HiC_24hr_4kb	rs7519046	0.3085	chr1	172807254	1.03709	1.67958	0.00117464	rs7517810	0.754632	UC	chr1:172807254-172807254	not_differential	FALSE
OCR_10668	chr1	172814367	172814945	TNFSF4	ENSG00000117586.6	HiC_8hr_4kb:HiC_24hr_4kb	rs76102156	0.1505	chr1	172814466	2.06718	2.81113	0.001966	rs7517810	0.636143	UC	chr1:172814466-172814466	not_differential	FALSE
OCR_10668	chr1	172814367	172814945	TNFSF4	ENSG00000117586.6	HiC_8hr_4kb:HiC_24hr_4kb	rs10753063	0.8239	chr1	172814663	0.0495204	1.02507	0.000716896	rs7517810	0.940567	UC	chr1:172814663-172814663	not_differential	FALSE
OCR_10668	chr1	172814367	172814945	TNFSF4	ENSG00000117586.6	HiC_8hr_4kb:HiC_24hr_4kb	rs12066143	0.3188	chr1	172814855	0.993863	1.64367	0.00114952	rs7517810	0.763922	UC	chr1:172814855-172814855	not_differential	FALSE
OCR_10668	chr1	172814367	172814945	TNFSF4	ENSG00000117586.6	HiC_8hr_4kb:HiC_24hr_4kb	rs76549919	0.6065	chr1	172814919	0.265303	1.14185	0.000798569	rs7517810	0.8345	UC	chr1:172814919-172814919	not_differential	FALSE
OCR_106692	chr3	71503381	71503879	FOXP1	ENSG00000114861.14	HiC_0hr_4kb:HiC_8hr_4kb:HiC_24hr_4kb:HiC_0hr_2kb	rs11707890	1.05e-13	chr3	71503479	55.2711	1.00455e+12	0.0206374	rs34346645	0.725942	VIT	chr3:71503479-71503479	1	FALSE
OCR_106692	chr3	71503381	71503879	RP11-154H23.3	ENSG00000270562.1	HiC_0hr_2kb:HiC_0hr_4kb:HiC_8hr_4kb	rs11707890	1.05e-13	chr3	71503479	55.2711	1.00455e+12	0.0206374	rs34346645	0.725942	VIT	chr3:71503479-71503479	1	FALSE
OCR_106694	chr3	71505223	71505655	FOXP1	ENSG00000114861.14	HiC_0hr_4kb:HiC_8hr_4kb:HiC_24hr_4kb:HiC_0hr_2kb	rs11720951	1.17e-12	chr3	71505567	50.536	9.41345e+10	0.00193389	rs34346645	0.94738	VIT	chr3:71505567-71505567	1	FALSE
OCR_106694	chr3	71505223	71505655	RP11-154H23.3	ENSG00000270562.1	HiC_8hr_4kb	rs11720951	1.17e-12	chr3	71505567	50.536	9.41345e+10	0.00193389	rs34346645	0.94738	VIT	chr3:71505567-71505567	1	FALSE
OCR_10671	chr1	172843847	172844477	TNFSF4	ENSG00000117586.6	HiC_8hr_4kb:HiC_24hr_4kb	rs12136659	2.939e-21	chr1	172844250	89.5839	2.8373e+19	0.0215404	rs7517810	0.879894	CRO	chr1:172844250-172844250	not_differential	FALSE
OCR_10671	chr1	172843847	172844477	TNFSF4	ENSG00000117586.6	HiC_8hr_4kb:HiC_24hr_4kb	rs12136659	1.02e-09	chr1	172844250	37.2863	1.24914e+08	0.186602	rs7517810	0.186602	IBD	chr1:172844250-172844250	not_differential	FALSE
OCR_10671	chr1	172843847	172844477	TNFSF4	ENSG00000117586.6	HiC_8hr_4kb:HiC_24hr_4kb	rs12136659	0.6991	chr1	172844250	0.14941	1.07757	0.00075361	rs7517810	0.863038	UC	chr1:172844250-172844250	not_differential	FALSE
OCR_10671	chr1	172843847	172844477	TNFSF4	ENSG00000117586.6	HiC_8hr_4kb:HiC_24hr_4kb	rs6425143	4.074e-21	chr1	172844352	88.9379	2.05411e+19	0.0155944	rs7517810	0.952563	CRO	chr1:172844352-172844352	not_differential	FALSE
OCR_10671	chr1	172843847	172844477	TNFSF4	ENSG00000117586.6	HiC_8hr_4kb:HiC_24hr_4kb	rs6425143	6.519e-09	chr1	172844352	33.6733	2.05145e+07	0.0306453	rs7517810	0.576215	IBD	chr1:172844352-172844352	not_differential	FALSE
OCR_10671	chr1	172843847	172844477	TNFSF4	ENSG00000117586.6	HiC_8hr_4kb:HiC_24hr_4kb	rs6425145	3.073e-21	chr1	172844409	89.4957	2.71489e+19	0.020611	rs7517810	0.900505	CRO	chr1:172844409-172844409	not_differential	FALSE
OCR_10671	chr1	172843847	172844477	TNFSF4	ENSG00000117586.6	HiC_8hr_4kb:HiC_24hr_4kb	rs6425145	1.829e-09	chr1	172844409	36.1479	7.06979e+07	0.105611	rs7517810	0.292213	IBD	chr1:172844409-172844409	not_differential	FALSE
OCR_106715	chr3	71553366	71554190	FOXP1	ENSG00000114861.14	HiC_0hr_4kb:HiC_8hr_2kb:HiC_8hr_4kb:HiC_24hr_4kb	rs6780776	1.85e-13	chr3	71554185	54.158	5.75782e+11	0.0118288	rs34346645	0.910379	VIT	chr3:71554185-71554185	1	FALSE
OCR_106720	chr3	71582352	71582526	FOXP1	ENSG00000114861.14	HiC_0hr_4kb:HiC_8hr_4kb	rs11714337	1.02e-13	chr3	71582521	55.3281	1.03358e+12	0.0212338	rs34346645	0.705304	VIT	chr3:71582521-71582521	1	FALSE
OCR_106720	chr3	71582352	71582526	FOXP1-IT1	ENSG00000242094.1	HiC_8hr_4kb	rs11714337	1.02e-13	chr3	71582521	55.3281	1.03358e+12	0.0212338	rs34346645	0.705304	VIT	chr3:71582521-71582521	not_differential	FALSE
OCR_106720	chr3	71582352	71582526	MIR1284	ENSG00000221264.1	HiC_8hr_4kb	rs11714337	1.02e-13	chr3	71582521	55.3281	1.03358e+12	0.0212338	rs34346645	0.705304	VIT	chr3:71582521-71582521	not_differential	FALSE
OCR_10673	chr1	172852709	172853261	TNFSF4	ENSG00000117586.6	HiC_8hr_4kb:HiC_24hr_4kb	rs6672265	0.8055	chr1	172852913	0.0606319	1.03078	0.00072089	rs7517810	0.927619	UC	chr1:172852913-172852913	not_differential	FALSE
OCR_10673	chr1	172852709	172853261	TNFSF4	ENSG00000117586.6	HiC_8hr_4kb:HiC_24hr_4kb	rs10912489	0.3702	chr1	172853024	0.802993	1.49406	0.00104489	rs7517810	0.776119	UC	chr1:172853024-172853024	not_differential	FALSE
OCR_10674	chr1	172863476	172864696	TNFSF4	ENSG00000117586.6	HiC_8hr_4kb	rs61828386	0.8115	chr1	172863647	0.0568781	1.02885	0.000719538	rs7517810	0.934103	UC	chr1:172863647-172863647	not_differential	FALSE
OCR_10674	chr1	172863476	172864696	TNFSF4	ENSG00000117586.6	HiC_8hr_4kb	rs2157453	3.891e-21	chr1	172863948	89.0288	2.14964e+19	0.0163197	rs7517810	0.936969	CRO	chr1:172863948-172863948	not_differential	FALSE
OCR_10674	chr1	172863476	172864696	TNFSF4	ENSG00000117586.6	HiC_8hr_4kb	rs2157453	1.194e-08	chr1	172863948	32.4966	1.13907e+07	0.0170159	rs7517810	0.957983	IBD	chr1:172863948-172863948	not_differential	FALSE
OCR_10674	chr1	172863476	172864696	TNFSF4	ENSG00000117586.6	HiC_8hr_4kb	rs2157453	0.7461	chr1	172863948	0.104837	1.05382	0.000737001	rs7517810	0.887551	UC	chr1:172863948-172863948	not_differential	FALSE
OCR_10674	chr1	172863476	172864696	TNFSF4	ENSG00000117586.6	HiC_8hr_4kb	rs2157454	1.949e-21	chr1	172863992	90.3966	4.25965e+19	0.0323386	rs7517810	0.690958	CRO	chr1:172863992-172863992	not_differential	FALSE
OCR_10674	chr1	172863476	172864696	TNFSF4	ENSG00000117586.6	HiC_8hr_4kb	rs2157454	1.01e-08	chr1	172863992	32.8219	1.34025e+07	0.0200212	rs7517810	0.887519	IBD	chr1:172863992-172863992	not_differential	FALSE
OCR_10674	chr1	172863476	172864696	TNFSF4	ENSG00000117586.6	HiC_8hr_4kb	rs2157454	0.7179	chr1	172863992	0.130514	1.06743	0.000746523	rs7517810	0.868285	UC	chr1:172863992-172863992	not_differential	FALSE
OCR_10674	chr1	172863476	172864696	TNFSF4	ENSG00000117586.6	HiC_8hr_4kb	rs76134097	0.6553	chr1	172864012	0.199283	1.10477	0.000772639	rs7517810	0.848557	UC	chr1:172864012-172864012	not_differential	FALSE
OCR_10674	chr1	172863476	172864696	TNFSF4	ENSG00000117586.6	HiC_8hr_4kb	rs140892010	0.8056	chr1	172864177	0.0605683	1.03075	0.000720867	rs7517810	0.929061	UC	chr1:172864177-172864177	not_differential	FALSE
OCR_10674	chr1	172863476	172864696	TNFSF4	ENSG00000117586.6	HiC_8hr_4kb	rs2187892	2.518e-21	chr1	172864183	89.8898	3.30617e+19	0.0250999	rs7517810	0.834092	CRO	chr1:172864183-172864183	not_differential	FALSE
OCR_10674	chr1	172863476	172864696	TNFSF4	ENSG00000117586.6	HiC_8hr_4kb	rs2187892	9.606e-09	chr1	172864183	32.9194	1.4072e+07	0.0210213	rs7517810	0.867498	IBD	chr1:172864183-172864183	not_differential	FALSE
OCR_10674	chr1	172863476	172864696	TNFSF4	ENSG00000117586.6	HiC_8hr_4kb	rs2187892	0.7314	chr1	172864183	0.11783	1.06069	0.000741804	rs7517810	0.874235	UC	chr1:172864183-172864183	not_differential	FALSE
OCR_10674	chr1	172863476	172864696	TNFSF4	ENSG00000117586.6	HiC_8hr_4kb	rs12142280	0.7976	chr1	172864652	0.0657689	1.03343	0.000722744	rs7517810	0.921126	UC	chr1:172864652-172864652	not_differential	FALSE
OCR_106786	chr3	72394700	72395029	RYBP	ENSG00000163602.9	HiC_0hr_4kb:HiC_8hr_4kb	rs61192126	1.557e-09	chr3	72394852	36.4616	8.27077e+07	0.958646	rs61192126	0.958646	ALG	chr3:72394852-72394852	1	FALSE
OCR_106786	chr3	72394700	72395029	SHQ1	ENSG00000144736.9	HiC_0hr_4kb:HiC_8hr_4kb	rs61192126	1.557e-09	chr3	72394852	36.4616	8.27077e+07	0.958646	rs61192126	0.958646	ALG	chr3:72394852-72394852	3	FALSE
OCR_109035	chr3	101098490	101099440	PCNP	ENSG00000081154.7	HiC_0hr_4kb:HiC_8hr_4kb	rs56230566	0.07182	chr3	101098658	3.24093	5.05543	0.000718152	rs503734	0.896391	UC	chr3:101098658-101098658	3	FALSE
OCR_109035	chr3	101098490	101099440	PCNP	ENSG00000081154.7	HiC_0hr_4kb:HiC_8hr_4kb	rs2049106	0.07152	chr3	101098810	3.24779	5.0728	0.000720619	rs503734	0.893514	UC	chr3:101098810-101098810	3	FALSE
OCR_109035	chr3	101098490	101099440	PCNP	ENSG00000081154.7	HiC_0hr_4kb:HiC_8hr_4kb	rs2049107	0.07087	chr3	101099191	3.26275	5.11091	0.000726033	rs503734	0.887732	UC	chr3:101099191-101099191	3	FALSE
OCR_109035	chr3	101098490	101099440	TRMT10C	ENSG00000174173.6	HiC_0hr_4kb	rs56230566	0.07182	chr3	101098658	3.24093	5.05543	0.000718152	rs503734	0.896391	UC	chr3:101098658-101098658	1	FALSE
OCR_109035	chr3	101098490	101099440	TRMT10C	ENSG00000174173.6	HiC_0hr_4kb	rs2049106	0.07152	chr3	101098810	3.24779	5.0728	0.000720619	rs503734	0.893514	UC	chr3:101098810-101098810	1	FALSE
OCR_109035	chr3	101098490	101099440	TRMT10C	ENSG00000174173.6	HiC_0hr_4kb	rs2049107	0.07087	chr3	101099191	3.26275	5.11091	0.000726033	rs503734	0.887732	UC	chr3:101099191-101099191	1	FALSE
OCR_109036	chr3	101100536	101101336	PCNP	ENSG00000081154.7	HiC_0hr_4kb:HiC_8hr_4kb:HiC_24hr_4kb	rs2049108	0.07309	chr3	101100965	3.21223	4.9834	0.00070792	rs503734	0.906374	UC	chr3:101100965-101100965	3	FALSE
OCR_109036	chr3	101100536	101101336	RP11-114I8.4	ENSG00000273488.1	HiC_8hr_4kb	rs2049108	0.07309	chr3	101100965	3.21223	4.9834	0.00070792	rs503734	0.906374	UC	chr3:101100965-101100965	not_differential	FALSE
OCR_109036	chr3	101100536	101101336	snoU13	ENSG00000238525.1	HiC_0hr_4kb	rs2049108	0.07309	chr3	101100965	3.21223	4.9834	0.00070792	rs503734	0.906374	UC	chr3:101100965-101100965	not_differential	FALSE
OCR_109036	chr3	101100536	101101336	TRMT10C	ENSG00000174173.6	HiC_0hr_2kb:HiC_0hr_4kb	rs2049108	0.07309	chr3	101100965	3.21223	4.9834	0.00070792	rs503734	0.906374	UC	chr3:101100965-101100965	1	FALSE
OCR_109037	chr3	101108855	101109740	NIT2	ENSG00000114021.7	HiC_8hr_4kb	rs9857389	0.06956	chr3	101108972	3.29337	5.18975	0.000737233	rs503734	0.880423	UC	chr3:101108972-101108972	5	FALSE
OCR_109037	chr3	101108855	101109740	NIT2	ENSG00000114021.7	HiC_8hr_4kb	rs9857723	0.07445	chr3	101109166	3.18208	4.90885	0.000697329	rs503734	0.909881	UC	chr3:101109166-101109166	5	FALSE
OCR_109037	chr3	101108855	101109740	NIT2	ENSG00000114021.7	HiC_8hr_4kb	rs9861774	0.07639	chr3	101109180	3.14008	4.80684	0.000682839	rs503734	0.91884	UC	chr3:101109180-101109180	5	FALSE
OCR_109037	chr3	101108855	101109740	NIT2	ENSG00000114021.7	HiC_8hr_4kb	rs9861976	0.09202	chr3	101109315	2.83868	4.13438	0.000587312	rs503734	0.9315	UC	chr3:101109315-101109315	5	FALSE
OCR_109037	chr3	101108855	101109740	NIT2	ENSG00000114021.7	HiC_8hr_4kb	rs7642168	0.0765	chr3	101109678	3.13773	4.80121	0.000682038	rs503734	0.919522	UC	chr3:101109678-101109678	5	FALSE
OCR_109037	chr3	101108855	101109740	NIT2	ENSG00000114021.7	HiC_8hr_4kb	rs7628516	0.07589	chr3	101109702	3.15079	4.83266	0.000686506	rs503734	0.916105	UC	chr3:101109702-101109702	5	FALSE
OCR_109037	chr3	101108855	101109740	PCNP	ENSG00000081154.7	HiC_0hr_4kb:HiC_8hr_4kb:HiC_24hr_4kb	rs9857389	0.06956	chr3	101108972	3.29337	5.18975	0.000737233	rs503734	0.880423	UC	chr3:101108972-101108972	3	FALSE
OCR_109037	chr3	101108855	101109740	PCNP	ENSG00000081154.7	HiC_0hr_4kb:HiC_8hr_4kb:HiC_24hr_4kb	rs9857723	0.07445	chr3	101109166	3.18208	4.90885	0.000697329	rs503734	0.909881	UC	chr3:101109166-101109166	3	FALSE
OCR_109037	chr3	101108855	101109740	PCNP	ENSG00000081154.7	HiC_0hr_4kb:HiC_8hr_4kb:HiC_24hr_4kb	rs9861774	0.07639	chr3	101109180	3.14008	4.80684	0.000682839	rs503734	0.91884	UC	chr3:101109180-101109180	3	FALSE
OCR_109037	chr3	101108855	101109740	PCNP	ENSG00000081154.7	HiC_0hr_4kb:HiC_8hr_4kb:HiC_24hr_4kb	rs9861976	0.09202	chr3	101109315	2.83868	4.13438	0.000587312	rs503734	0.9315	UC	chr3:101109315-101109315	3	FALSE
OCR_109037	chr3	101108855	101109740	PCNP	ENSG00000081154.7	HiC_0hr_4kb:HiC_8hr_4kb:HiC_24hr_4kb	rs7642168	0.0765	chr3	101109678	3.13773	4.80121	0.000682038	rs503734	0.919522	UC	chr3:101109678-101109678	3	FALSE
OCR_109037	chr3	101108855	101109740	PCNP	ENSG00000081154.7	HiC_0hr_4kb:HiC_8hr_4kb:HiC_24hr_4kb	rs7628516	0.07589	chr3	101109702	3.15079	4.83266	0.000686506	rs503734	0.916105	UC	chr3:101109702-101109702	3	FALSE
OCR_109037	chr3	101108855	101109740	SENP7	ENSG00000138468.11	HiC_0hr_4kb	rs9857389	0.06956	chr3	101108972	3.29337	5.18975	0.000737233	rs503734	0.880423	UC	chr3:101108972-101108972	4	FALSE
OCR_109037	chr3	101108855	101109740	SENP7	ENSG00000138468.11	HiC_0hr_4kb	rs9857723	0.07445	chr3	101109166	3.18208	4.90885	0.000697329	rs503734	0.909881	UC	chr3:101109166-101109166	4	FALSE
OCR_109037	chr3	101108855	101109740	SENP7	ENSG00000138468.11	HiC_0hr_4kb	rs9861774	0.07639	chr3	101109180	3.14008	4.80684	0.000682839	rs503734	0.91884	UC	chr3:101109180-101109180	4	FALSE
OCR_109037	chr3	101108855	101109740	SENP7	ENSG00000138468.11	HiC_0hr_4kb	rs9861976	0.09202	chr3	101109315	2.83868	4.13438	0.000587312	rs503734	0.9315	UC	chr3:101109315-101109315	4	FALSE
OCR_109037	chr3	101108855	101109740	SENP7	ENSG00000138468.11	HiC_0hr_4kb	rs7642168	0.0765	chr3	101109678	3.13773	4.80121	0.000682038	rs503734	0.919522	UC	chr3:101109678-101109678	4	FALSE
OCR_109037	chr3	101108855	101109740	SENP7	ENSG00000138468.11	HiC_0hr_4kb	rs7628516	0.07589	chr3	101109702	3.15079	4.83266	0.000686506	rs503734	0.916105	UC	chr3:101109702-101109702	4	FALSE
OCR_109037	chr3	101108855	101109740	snoU13	ENSG00000238525.1	HiC_0hr_4kb	rs9857389	0.06956	chr3	101108972	3.29337	5.18975	0.000737233	rs503734	0.880423	UC	chr3:101108972-101108972	not_differential	FALSE
OCR_109037	chr3	101108855	101109740	snoU13	ENSG00000238525.1	HiC_0hr_4kb	rs9857723	0.07445	chr3	101109166	3.18208	4.90885	0.000697329	rs503734	0.909881	UC	chr3:101109166-101109166	not_differential	FALSE
OCR_109037	chr3	101108855	101109740	snoU13	ENSG00000238525.1	HiC_0hr_4kb	rs9861774	0.07639	chr3	101109180	3.14008	4.80684	0.000682839	rs503734	0.91884	UC	chr3:101109180-101109180	not_differential	FALSE
OCR_109037	chr3	101108855	101109740	snoU13	ENSG00000238525.1	HiC_0hr_4kb	rs9861976	0.09202	chr3	101109315	2.83868	4.13438	0.000587312	rs503734	0.9315	UC	chr3:101109315-101109315	not_differential	FALSE
OCR_109037	chr3	101108855	101109740	snoU13	ENSG00000238525.1	HiC_0hr_4kb	rs7642168	0.0765	chr3	101109678	3.13773	4.80121	0.000682038	rs503734	0.919522	UC	chr3:101109678-101109678	not_differential	FALSE
OCR_109037	chr3	101108855	101109740	snoU13	ENSG00000238525.1	HiC_0hr_4kb	rs7628516	0.07589	chr3	101109702	3.15079	4.83266	0.000686506	rs503734	0.916105	UC	chr3:101109702-101109702	not_differential	FALSE
OCR_109037	chr3	101108855	101109740	TRMT10C	ENSG00000174173.6	HiC_0hr_4kb	rs9857389	0.06956	chr3	101108972	3.29337	5.18975	0.000737233	rs503734	0.880423	UC	chr3:101108972-101108972	1	FALSE
OCR_109037	chr3	101108855	101109740	TRMT10C	ENSG00000174173.6	HiC_0hr_4kb	rs9857723	0.07445	chr3	101109166	3.18208	4.90885	0.000697329	rs503734	0.909881	UC	chr3:101109166-101109166	1	FALSE
OCR_109037	chr3	101108855	101109740	TRMT10C	ENSG00000174173.6	HiC_0hr_4kb	rs9861774	0.07639	chr3	101109180	3.14008	4.80684	0.000682839	rs503734	0.91884	UC	chr3:101109180-101109180	1	FALSE
OCR_109037	chr3	101108855	101109740	TRMT10C	ENSG00000174173.6	HiC_0hr_4kb	rs9861976	0.09202	chr3	101109315	2.83868	4.13438	0.000587312	rs503734	0.9315	UC	chr3:101109315-101109315	1	FALSE
OCR_109037	chr3	101108855	101109740	TRMT10C	ENSG00000174173.6	HiC_0hr_4kb	rs7642168	0.0765	chr3	101109678	3.13773	4.80121	0.000682038	rs503734	0.919522	UC	chr3:101109678-101109678	1	FALSE
OCR_109037	chr3	101108855	101109740	TRMT10C	ENSG00000174173.6	HiC_0hr_4kb	rs7628516	0.07589	chr3	101109702	3.15079	4.83266	0.000686506	rs503734	0.916105	UC	chr3:101109702-101109702	1	FALSE
OCR_109040	chr3	101143015	101144611	SENP7	ENSG00000138468.11	HiC_0hr_4kb	rs2317700	8.663e-06	chr3	101143166	19.7857	19788	0.0174737	rs13088318	0.857891	ALG	chr3:101143166-101143166	4	FALSE
OCR_109040	chr3	101143015	101144611	snoU13	ENSG00000238525.1	HiC_0hr_4kb	rs2317700	8.663e-06	chr3	101143166	19.7857	19788	0.0174737	rs13088318	0.857891	ALG	chr3:101143166-101143166	not_differential	FALSE
OCR_109044	chr3	101185425	101186716	PCNP	ENSG00000081154.7	HiC_0hr_4kb	rs4683917	9.802e-06	chr3	101186025	19.5496	17585.2	0.0155285	rs13088318	0.923324	ALG	chr3:101186025-101186025	3	FALSE
OCR_109044	chr3	101185425	101186716	SENP7	ENSG00000138468.11	HiC_0hr_4kb	rs4683917	9.802e-06	chr3	101186025	19.5496	17585.2	0.0155285	rs13088318	0.923324	ALG	chr3:101186025-101186025	4	FALSE
OCR_109044	chr3	101185425	101186716	snoU13	ENSG00000238525.1	HiC_0hr_4kb	rs4683917	9.802e-06	chr3	101186025	19.5496	17585.2	0.0155285	rs13088318	0.923324	ALG	chr3:101186025-101186025	not_differential	FALSE
OCR_109044	chr3	101185425	101186716	TRMT10C	ENSG00000174173.6	HiC_0hr_4kb	rs4683917	9.802e-06	chr3	101186025	19.5496	17585.2	0.0155285	rs13088318	0.923324	ALG	chr3:101186025-101186025	1	FALSE
OCR_109044	chr3	101185425	101186716	Y_RNA	ENSG00000201554.1	HiC_0hr_4kb	rs4683917	9.802e-06	chr3	101186025	19.5496	17585.2	0.0155285	rs13088318	0.923324	ALG	chr3:101186025-101186025	not_differential	FALSE
OCR_109047	chr3	101198125	101198711	PCNP	ENSG00000081154.7	HiC_0hr_4kb	rs7636475	7.601e-06	chr3	101198604	20.0357	22423.1	0.0198006	rs13088318	0.745871	ALG	chr3:101198604-101198604	3	FALSE
OCR_109047	chr3	101198125	101198711	TRMT10C	ENSG00000174173.6	HiC_0hr_4kb:HiC_8hr_4kb	rs7636475	7.601e-06	chr3	101198604	20.0357	22423.1	0.0198006	rs13088318	0.745871	ALG	chr3:101198604-101198604	1	FALSE
OCR_109049	chr3	101215110	101215565	PCNP	ENSG00000081154.7	HiC_0hr_4kb:HiC_8hr_4kb	rs10936664	6.605e-06	chr3	101215356	20.3044	25646.9	0.0226474	rs13088318	0.53534	ALG	chr3:101215356-101215356	3	FALSE
OCR_109049	chr3	101215110	101215565	TRMT10C	ENSG00000174173.6	HiC_0hr_4kb	rs10936664	6.605e-06	chr3	101215356	20.3044	25646.9	0.0226474	rs13088318	0.53534	ALG	chr3:101215356-101215356	1	FALSE
OCR_109051	chr3	101230644	101230860	PCNP	ENSG00000081154.7	HiC_0hr_2kb:HiC_0hr_4kb:HiC_8hr_4kb	rs28565548	6.653e-06	chr3	101230663	20.2905	25469.9	0.022491	rs13088318	0.557831	ALG	chr3:101230663-101230663	3	FALSE
OCR_109051	chr3	101230644	101230860	PCNP	ENSG00000081154.7	HiC_0hr_2kb:HiC_0hr_4kb:HiC_8hr_4kb	rs34255148	6.119e-06	chr3	101230678	20.4506	27592.7	0.0243656	rs13088318	0.418444	ALG	chr3:101230678-101230678	3	FALSE
OCR_109051	chr3	101230644	101230860	snoU13	ENSG00000238525.1	HiC_0hr_4kb	rs28565548	6.653e-06	chr3	101230663	20.2905	25469.9	0.022491	rs13088318	0.557831	ALG	chr3:101230663-101230663	not_differential	FALSE
OCR_109051	chr3	101230644	101230860	snoU13	ENSG00000238525.1	HiC_0hr_4kb	rs34255148	6.119e-06	chr3	101230678	20.4506	27592.7	0.0243656	rs13088318	0.418444	ALG	chr3:101230678-101230678	not_differential	FALSE
OCR_109051	chr3	101230644	101230860	TRMT10C	ENSG00000174173.6	HiC_0hr_4kb	rs28565548	6.653e-06	chr3	101230663	20.2905	25469.9	0.022491	rs13088318	0.557831	ALG	chr3:101230663-101230663	1	FALSE
OCR_109051	chr3	101230644	101230860	TRMT10C	ENSG00000174173.6	HiC_0hr_4kb	rs34255148	6.119e-06	chr3	101230678	20.4506	27592.7	0.0243656	rs13088318	0.418444	ALG	chr3:101230678-101230678	1	FALSE
OCR_109052	chr3	101231002	101232491	PCNP	ENSG00000081154.7	HiC_0hr_2kb:HiC_0hr_4kb:HiC_8hr_4kb	rs16843927	9.02e-06	chr3	101231368	19.7085	19039	0.0168123	rs13088318	0.874703	ALG	chr3:101231368-101231368	3	FALSE
OCR_109052	chr3	101231002	101232491	snoU13	ENSG00000238525.1	HiC_0hr_4kb	rs16843927	9.02e-06	chr3	101231368	19.7085	19039	0.0168123	rs13088318	0.874703	ALG	chr3:101231368-101231368	not_differential	FALSE
OCR_109052	chr3	101231002	101232491	TRMT10C	ENSG00000174173.6	HiC_0hr_2kb:HiC_0hr_4kb	rs16843927	9.02e-06	chr3	101231368	19.7085	19039	0.0168123	rs13088318	0.874703	ALG	chr3:101231368-101231368	1	FALSE
OCR_109055	chr3	101249087	101251103	PCNP	ENSG00000081154.7	HiC_0hr_4kb	rs9814991	7.785e-06	chr3	101250166	19.99	21916.1	0.0193529	rs13088318	0.78466	ALG	chr3:101250166-101250166	3	FALSE
OCR_109055	chr3	101249087	101251103	SENP7	ENSG00000138468.11	HiC_0hr_4kb	rs9814991	7.785e-06	chr3	101250166	19.99	21916.1	0.0193529	rs13088318	0.78466	ALG	chr3:101250166-101250166	4	FALSE
OCR_109055	chr3	101249087	101251103	TRMT10C	ENSG00000174173.6	HiC_0hr_4kb	rs9814991	7.785e-06	chr3	101250166	19.99	21916.1	0.0193529	rs13088318	0.78466	ALG	chr3:101250166-101250166	1	FALSE
OCR_109058	chr3	101263083	101263618	SENP7	ENSG00000138468.11	HiC_0hr_4kb	rs1019677	7.37e-06	chr3	101263573	20.0947	23094.7	0.0203937	rs13088318	0.706222	ALG	chr3:101263573-101263573	4	FALSE
OCR_109058	chr3	101263083	101263618	snoU13	ENSG00000238525.1	HiC_0hr_4kb	rs1019677	7.37e-06	chr3	101263573	20.0947	23094.7	0.0203937	rs13088318	0.706222	ALG	chr3:101263573-101263573	not_differential	FALSE
OCR_109058	chr3	101263083	101263618	TRMT10C	ENSG00000174173.6	HiC_0hr_4kb	rs1019677	7.37e-06	chr3	101263573	20.0947	23094.7	0.0203937	rs13088318	0.706222	ALG	chr3:101263573-101263573	1	FALSE
OCR_111843	chr3	141251527	141252019	RASA2	ENSG00000155903.7	HiC_0hr_2kb:HiC_0hr_4kb:HiC_8hr_4kb	rs9289634	2.605e-08	chr3	141251655	30.9815	5.34007e+06	0.00944747	rs10663129	0.842945	ALG	chr3:141251655-141251655	not_differential	FALSE
OCR_111843	chr3	141251527	141252019	RASA2-IT1	ENSG00000250170.1	HiC_0hr_4kb:HiC_24hr_4kb	rs9289634	2.605e-08	chr3	141251655	30.9815	5.34007e+06	0.00944747	rs10663129	0.842945	ALG	chr3:141251655-141251655	4	FALSE
OCR_111846	chr3	141263580	141264028	RASA2	ENSG00000155903.7	HiC_0hr_2kb:HiC_0hr_4kb:HiC_8hr_2kb:HiC_8hr_4kb:HiC_24hr_2kb:HiC_24hr_4kb	rs9835593	2.892e-08	chr3	141263990	30.7787	4.82505e+06	0.00853633	rs10663129	0.924522	ALG	chr3:141263990-141263990	not_differential	FALSE
OCR_111846	chr3	141263580	141264028	RASA2-IT1	ENSG00000250170.1	HiC_0hr_4kb	rs9835593	2.892e-08	chr3	141263990	30.7787	4.82505e+06	0.00853633	rs10663129	0.924522	ALG	chr3:141263990-141263990	4	FALSE
OCR_111849	chr3	141271870	141272317	RASA2	ENSG00000155903.7	HiC_0hr_1kb:HiC_0hr_2kb:HiC_0hr_4kb:HiC_8hr_2kb:HiC_8hr_4kb:HiC_24hr_4kb	rs9850416	2.079e-08	chr3	141272216	31.4193	6.64695e+06	0.0117596	rs10663129	0.64469	ALG	chr3:141272216-141272216	not_differential	FALSE
OCR_111849	chr3	141271870	141272317	RASA2	ENSG00000155903.7	HiC_0hr_1kb:HiC_0hr_2kb:HiC_0hr_4kb:HiC_8hr_2kb:HiC_8hr_4kb:HiC_24hr_4kb	rs35938493	3.342e-09	chr3	141272269	34.9736	3.93032e+07	0.069534	rs10663129	0.455557	ALG	chr3:141272269-141272269	not_differential	FALSE
OCR_111849	chr3	141271870	141272317	RASA2-IT1	ENSG00000250170.1	HiC_0hr_4kb:HiC_8hr_4kb	rs9850416	2.079e-08	chr3	141272216	31.4193	6.64695e+06	0.0117596	rs10663129	0.64469	ALG	chr3:141272216-141272216	4	FALSE
OCR_111849	chr3	141271870	141272317	RASA2-IT1	ENSG00000250170.1	HiC_0hr_4kb:HiC_8hr_4kb	rs35938493	3.342e-09	chr3	141272269	34.9736	3.93032e+07	0.069534	rs10663129	0.455557	ALG	chr3:141272269-141272269	4	FALSE
OCR_111855	chr3	141295013	141295638	ACPL2	ENSG00000155893.7	HiC_0hr_4kb	rs11714208	2.115e-08	chr3	141295050	31.386	6.53709e+06	0.0115652	rs10663129	0.656256	ALG	chr3:141295050-141295050	4	FALSE
OCR_111855	chr3	141295013	141295638	ATP1B3	ENSG00000069849.6	HiC_0hr_2kb:HiC_0hr_4kb:HiC_8hr_4kb:HiC_24hr_4kb	rs11714208	2.115e-08	chr3	141295050	31.386	6.53709e+06	0.0115652	rs10663129	0.656256	ALG	chr3:141295050-141295050	3	FALSE
OCR_111855	chr3	141295013	141295638	ATP1B3-AS1	ENSG00000244124.1	HiC_0hr_4kb:HiC_8hr_4kb:HiC_24hr_4kb	rs11714208	2.115e-08	chr3	141295050	31.386	6.53709e+06	0.0115652	rs10663129	0.656256	ALG	chr3:141295050-141295050	not_differential	FALSE
OCR_111855	chr3	141295013	141295638	RASA2	ENSG00000155903.7	HiC_0hr_4kb:HiC_24hr_4kb	rs11714208	2.115e-08	chr3	141295050	31.386	6.53709e+06	0.0115652	rs10663129	0.656256	ALG	chr3:141295050-141295050	not_differential	FALSE
OCR_111855	chr3	141295013	141295638	RNU6-509P	ENSG00000200389.1	HiC_8hr_4kb	rs11714208	2.115e-08	chr3	141295050	31.386	6.53709e+06	0.0115652	rs10663129	0.656256	ALG	chr3:141295050-141295050	not_differential	FALSE
OCR_111855	chr3	141295013	141295638	TFDP2	ENSG00000114126.13	HiC_0hr_4kb:HiC_8hr_4kb	rs11714208	2.115e-08	chr3	141295050	31.386	6.53709e+06	0.0115652	rs10663129	0.656256	ALG	chr3:141295050-141295050	4	FALSE
OCR_111855	chr3	141295013	141295638	ZBTB38	ENSG00000177311.6	HiC_8hr_4kb	rs11714208	2.115e-08	chr3	141295050	31.386	6.53709e+06	0.0115652	rs10663129	0.656256	ALG	chr3:141295050-141295050	4	FALSE
OCR_115343	chr3	187778717	187779504	BCL6	ENSG00000113916.13	HiC_0hr_4kb:HiC_8hr_4kb:HiC_24hr_4kb	rs62279869	4.711e-07	chr3	187779092	25.3787	324270	0.0183082	rs2030030	0.865994	ALG	chr3:187779092-187779092	1	FALSE
OCR_115343	chr3	187778717	187779504	LPP	ENSG00000145012.8	HiC_8hr_4kb	rs62279869	4.711e-07	chr3	187779092	25.3787	324270	0.0183082	rs2030030	0.865994	ALG	chr3:187779092-187779092	5	FALSE
OCR_115343	chr3	187778717	187779504	RP11-211G3.2	ENSG00000223401.1	HiC_8hr_4kb:HiC_24hr_4kb	rs62279869	4.711e-07	chr3	187779092	25.3787	324270	0.0183082	rs2030030	0.865994	ALG	chr3:187779092-187779092	not_differential	FALSE
OCR_115372	chr3	188076639	188077952	BCL6	ENSG00000113916.13	HiC_0hr_4kb:HiC_8hr_4kb	rs11709472	2.087e-11	chr3	188077586	44.8874	5.58686e+09	0.0265507	rs60946162	0.870375	ALG	chr3:188077586-188077586	1	FALSE
OCR_115372	chr3	188076639	188077952	RP11-211G3.2	ENSG00000223401.1	HiC_0hr_4kb:HiC_8hr_4kb	rs11709472	2.087e-11	chr3	188077586	44.8874	5.58686e+09	0.0265507	rs60946162	0.870375	ALG	chr3:188077586-188077586	not_differential	FALSE
OCR_115375	chr3	188107593	188108760	BCL6	ENSG00000113916.13	HiC_0hr_4kb:HiC_8hr_4kb:HiC_24hr_4kb	rs56046601	1.481e-11	chr3	188108642	45.5591	7.81697e+09	0.0371489	rs60946162	0.618119	ALG	chr3:188108642-188108642	1	FALSE
OCR_115375	chr3	188107593	188108760	LPP	ENSG00000145012.8	HiC_24hr_4kb	rs56046601	1.481e-11	chr3	188108642	45.5591	7.81697e+09	0.0371489	rs60946162	0.618119	ALG	chr3:188108642-188108642	5	FALSE
OCR_115375	chr3	188107593	188108760	RP11-211G3.2	ENSG00000223401.1	HiC_8hr_4kb:HiC_24hr_4kb	rs56046601	1.481e-11	chr3	188108642	45.5591	7.81697e+09	0.0371489	rs60946162	0.618119	ALG	chr3:188108642-188108642	not_differential	FALSE
OCR_115376	chr3	188115142	188115609	BCL6	ENSG00000113916.13	HiC_0hr_4kb:HiC_8hr_4kb:HiC_24hr_4kb	rs9834159	2.09129e-07	chr3	188115232	26.9468	710284	0.0401699	rs13093110	0.735941	ATD	chr3:188115232-188115232	1	FALSE
OCR_115376	chr3	188115142	188115609	RP11-211G3.2	ENSG00000223401.1	HiC_0hr_4kb:HiC_8hr_4kb:HiC_24hr_4kb	rs9834159	2.09129e-07	chr3	188115232	26.9468	710284	0.0401699	rs13093110	0.735941	ATD	chr3:188115232-188115232	not_differential	FALSE
OCR_115377	chr3	188118125	188118953	BCL6	ENSG00000113916.13	HiC_0hr_4kb:HiC_8hr_4kb:HiC_24hr_4kb	rs4686483	1.82499e-07	chr3	188118225	27.2101	810227	0.0458221	rs13093110	0.655383	ATD	chr3:188118225-188118225	1	FALSE
OCR_115377	chr3	188118125	188118953	BCL6	ENSG00000113916.13	HiC_0hr_4kb:HiC_8hr_4kb:HiC_24hr_4kb	rs4686484	1.69935e-07	chr3	188118572	27.3481	868070	0.0490934	rs13093110	0.609561	ATD	chr3:188118572-188118572	1	FALSE
OCR_115377	chr3	188118125	188118953	BCL6	ENSG00000113916.13	HiC_0hr_4kb:HiC_8hr_4kb:HiC_24hr_4kb	rs6778720	1.64203e-07	chr3	188118877	27.4144	897353	0.0507496	rs13093110	0.46151	ATD	chr3:188118877-188118877	1	FALSE
OCR_115377	chr3	188118125	188118953	RP11-211G3.2	ENSG00000223401.1	HiC_0hr_4kb:HiC_8hr_2kb:HiC_8hr_4kb:HiC_24hr_4kb	rs4686483	1.82499e-07	chr3	188118225	27.2101	810227	0.0458221	rs13093110	0.655383	ATD	chr3:188118225-188118225	not_differential	FALSE
OCR_115377	chr3	188118125	188118953	RP11-211G3.2	ENSG00000223401.1	HiC_0hr_4kb:HiC_8hr_2kb:HiC_8hr_4kb:HiC_24hr_4kb	rs4686484	1.69935e-07	chr3	188118572	27.3481	868070	0.0490934	rs13093110	0.609561	ATD	chr3:188118572-188118572	not_differential	FALSE
OCR_115377	chr3	188118125	188118953	RP11-211G3.2	ENSG00000223401.1	HiC_0hr_4kb:HiC_8hr_2kb:HiC_8hr_4kb:HiC_24hr_4kb	rs6778720	1.64203e-07	chr3	188118877	27.4144	897353	0.0507496	rs13093110	0.46151	ATD	chr3:188118877-188118877	not_differential	FALSE
OCR_115378	chr3	188121246	188121757	BCL6	ENSG00000113916.13	HiC_0hr_4kb:HiC_8hr_4kb:HiC_24hr_4kb	rs12639588	3.554e-11	chr3	188121263	43.8452	3.31792e+09	0.0157679	rs60946162	0.919762	ALG	chr3:188121263-188121263	1	FALSE
OCR_115378	chr3	188121246	188121757	BCL6	ENSG00000113916.13	HiC_0hr_4kb:HiC_8hr_4kb:HiC_24hr_4kb	rs12639588	7.8818e-07	chr3	188121263	24.3865	197455	0.011167	rs13093110	0.896337	ATD	chr3:188121263-188121263	1	FALSE
OCR_115378	chr3	188121246	188121757	LPP	ENSG00000145012.8	HiC_8hr_4kb	rs12639588	3.554e-11	chr3	188121263	43.8452	3.31792e+09	0.0157679	rs60946162	0.919762	ALG	chr3:188121263-188121263	5	FALSE
OCR_115378	chr3	188121246	188121757	LPP	ENSG00000145012.8	HiC_8hr_4kb	rs12639588	7.8818e-07	chr3	188121263	24.3865	197455	0.011167	rs13093110	0.896337	ATD	chr3:188121263-188121263	5	FALSE
OCR_115378	chr3	188121246	188121757	RP11-211G3.2	ENSG00000223401.1	HiC_0hr_4kb:HiC_8hr_4kb:HiC_24hr_4kb	rs12639588	3.554e-11	chr3	188121263	43.8452	3.31792e+09	0.0157679	rs60946162	0.919762	ALG	chr3:188121263-188121263	not_differential	FALSE
OCR_115378	chr3	188121246	188121757	RP11-211G3.2	ENSG00000223401.1	HiC_0hr_4kb:HiC_8hr_4kb:HiC_24hr_4kb	rs12639588	7.8818e-07	chr3	188121263	24.3865	197455	0.011167	rs13093110	0.896337	ATD	chr3:188121263-188121263	not_differential	FALSE
OCR_115393	chr3	188400934	188401281	BCL6	ENSG00000113916.13	HiC_0hr_4kb:HiC_8hr_4kb:HiC_24hr_4kb	rs55661102	1.453e-09	chr3	188401138	36.5964	8.84722e+07	0.0643234	rs17607589	0.808625	ALG	chr3:188401138-188401138	1	FALSE
OCR_115393	chr3	188400934	188401281	BCL6	ENSG00000113916.13	HiC_0hr_4kb:HiC_8hr_4kb:HiC_24hr_4kb	rs56116661	5.668e-10	chr3	188401160	38.4325	2.21572e+08	0.642474	rs56116661	0.642474	CRO	chr3:188401160-188401160	1	FALSE
OCR_115393	chr3	188400934	188401281	BCL6	ENSG00000113916.13	HiC_0hr_4kb:HiC_8hr_4kb:HiC_24hr_4kb	rs56116661	9.271e-10	chr3	188401160	37.4725	1.37105e+08	0.530745	rs56116661	0.530745	IBD	chr3:188401160-188401160	1	FALSE
OCR_115393	chr3	188400934	188401281	BCL6	ENSG00000113916.13	HiC_0hr_4kb:HiC_8hr_4kb:HiC_24hr_4kb	rs56116661	9.209e-05	chr3	188401160	15.2923	2092.6	0.00607713	rs56116661	0.935939	UC	chr3:188401160-188401160	1	FALSE
OCR_115393	chr3	188400934	188401281	RP11-211G3.2	ENSG00000223401.1	HiC_8hr_4kb:HiC_24hr_4kb	rs55661102	1.453e-09	chr3	188401138	36.5964	8.84722e+07	0.0643234	rs17607589	0.808625	ALG	chr3:188401138-188401138	not_differential	FALSE
OCR_115393	chr3	188400934	188401281	RP11-211G3.2	ENSG00000223401.1	HiC_8hr_4kb:HiC_24hr_4kb	rs56116661	5.668e-10	chr3	188401160	38.4325	2.21572e+08	0.642474	rs56116661	0.642474	CRO	chr3:188401160-188401160	not_differential	FALSE
OCR_115393	chr3	188400934	188401281	RP11-211G3.2	ENSG00000223401.1	HiC_8hr_4kb:HiC_24hr_4kb	rs56116661	9.271e-10	chr3	188401160	37.4725	1.37105e+08	0.530745	rs56116661	0.530745	IBD	chr3:188401160-188401160	not_differential	FALSE
OCR_115393	chr3	188400934	188401281	RP11-211G3.2	ENSG00000223401.1	HiC_8hr_4kb:HiC_24hr_4kb	rs56116661	9.209e-05	chr3	188401160	15.2923	2092.6	0.00607713	rs56116661	0.935939	UC	chr3:188401160-188401160	not_differential	FALSE
OCR_115393	chr3	188400934	188401281	RP11-44H4.1	ENSG00000236864.1	HiC_8hr_4kb	rs55661102	1.453e-09	chr3	188401138	36.5964	8.84722e+07	0.0643234	rs17607589	0.808625	ALG	chr3:188401138-188401138	not_differential	FALSE
OCR_115393	chr3	188400934	188401281	RP11-44H4.1	ENSG00000236864.1	HiC_8hr_4kb	rs56116661	5.668e-10	chr3	188401160	38.4325	2.21572e+08	0.642474	rs56116661	0.642474	CRO	chr3:188401160-188401160	not_differential	FALSE
OCR_115393	chr3	188400934	188401281	RP11-44H4.1	ENSG00000236864.1	HiC_8hr_4kb	rs56116661	9.271e-10	chr3	188401160	37.4725	1.37105e+08	0.530745	rs56116661	0.530745	IBD	chr3:188401160-188401160	not_differential	FALSE
OCR_115393	chr3	188400934	188401281	RP11-44H4.1	ENSG00000236864.1	HiC_8hr_4kb	rs56116661	9.209e-05	chr3	188401160	15.2923	2092.6	0.00607713	rs56116661	0.935939	UC	chr3:188401160-188401160	not_differential	FALSE
OCR_115883	chr3	196358564	196360052	CEP19	ENSG00000174007.7	HiC_0hr_4kb	rs75366683	1.013e-09	chr3	196358636	37.2997	1.25756e+08	0.0079388	rs80064395	0.949458	ALG	chr3:196358636-196358636	not_differential	FALSE
OCR_115883	chr3	196358564	196360052	CEP19	ENSG00000174007.7	HiC_0hr_4kb	rs12718062	4.66e-07	chr3	196358717	25.3997	327692	0.0330698	rs6583331	0.970721	VIT	chr3:196358717-196358717	not_differential	FALSE
OCR_115883	chr3	196358564	196360052	NRROS	ENSG00000174004.5	HiC_0hr_2kb:HiC_8hr_2kb	rs75366683	1.013e-09	chr3	196358636	37.2997	1.25756e+08	0.0079388	rs80064395	0.949458	ALG	chr3:196358636-196358636	5	FALSE
OCR_115883	chr3	196358564	196360052	NRROS	ENSG00000174004.5	HiC_0hr_2kb:HiC_8hr_2kb	rs12718062	4.66e-07	chr3	196358717	25.3997	327692	0.0330698	rs6583331	0.970721	VIT	chr3:196358717-196358717	5	FALSE
OCR_115883	chr3	196358564	196360052	PAK2	ENSG00000180370.6	HiC_0hr_4kb	rs75366683	1.013e-09	chr3	196358636	37.2997	1.25756e+08	0.0079388	rs80064395	0.949458	ALG	chr3:196358636-196358636	not_differential	FALSE
OCR_115883	chr3	196358564	196360052	PAK2	ENSG00000180370.6	HiC_0hr_4kb	rs12718062	4.66e-07	chr3	196358717	25.3997	327692	0.0330698	rs6583331	0.970721	VIT	chr3:196358717-196358717	not_differential	FALSE
OCR_115883	chr3	196358564	196360052	PIGX	ENSG00000163964.9	HiC_0hr_2kb:HiC_0hr_4kb:HiC_8hr_2kb	rs75366683	1.013e-09	chr3	196358636	37.2997	1.25756e+08	0.0079388	rs80064395	0.949458	ALG	chr3:196358636-196358636	5	FALSE
OCR_115883	chr3	196358564	196360052	PIGX	ENSG00000163964.9	HiC_0hr_2kb:HiC_0hr_4kb:HiC_8hr_2kb	rs12718062	4.66e-07	chr3	196358717	25.3997	327692	0.0330698	rs6583331	0.970721	VIT	chr3:196358717-196358717	5	FALSE
OCR_115883	chr3	196358564	196360052	RNU6-646P	ENSG00000201441.1	HiC_0hr_4kb:HiC_8hr_4kb	rs75366683	1.013e-09	chr3	196358636	37.2997	1.25756e+08	0.0079388	rs80064395	0.949458	ALG	chr3:196358636-196358636	not_differential	FALSE
OCR_115883	chr3	196358564	196360052	RNU6-646P	ENSG00000201441.1	HiC_0hr_4kb:HiC_8hr_4kb	rs12718062	4.66e-07	chr3	196358717	25.3997	327692	0.0330698	rs6583331	0.970721	VIT	chr3:196358717-196358717	not_differential	FALSE
OCR_115886	chr3	196368250	196369050	CEP19	ENSG00000174007.7	HiC_0hr_4kb	rs12152276	2.372e-10	chr3	196368501	40.1334	5.18626e+08	0.0327402	rs80064395	0.835895	ALG	chr3:196368501-196368501	not_differential	FALSE
OCR_115886	chr3	196368250	196369050	LINC01063	ENSG00000232065.1	HiC_0hr_4kb	rs12152276	2.372e-10	chr3	196368501	40.1334	5.18626e+08	0.0327402	rs80064395	0.835895	ALG	chr3:196368501-196368501	not_differential	FALSE
OCR_115886	chr3	196368250	196369050	PIGX	ENSG00000163964.9	HiC_0hr_4kb	rs12152276	2.372e-10	chr3	196368501	40.1334	5.18626e+08	0.0327402	rs80064395	0.835895	ALG	chr3:196368501-196368501	5	FALSE
OCR_115886	chr3	196368250	196369050	RNU6-646P	ENSG00000201441.1	HiC_0hr_4kb	rs12152276	2.372e-10	chr3	196368501	40.1334	5.18626e+08	0.0327402	rs80064395	0.835895	ALG	chr3:196368501-196368501	not_differential	FALSE
OCR_116017	chr4	966479	967770	ATP5I	ENSG00000169020.5	HiC_0hr_4kb:HiC_8hr_4kb	rs113075206	5.06883e-07	chr4	967339	25.2375	302164	0.0312703	rs4690229	0.8413	SLE	chr4:967339-967339	3	FALSE
OCR_116017	chr4	966479	967770	ATP5I	ENSG00000169020.5	HiC_0hr_4kb:HiC_8hr_4kb	rs13137144	1.59946e-07	chr4	967445	27.4652	920438	0.0952541	rs4690229	0.439129	SLE	chr4:967445-967445	3	FALSE
OCR_116017	chr4	966479	967770	CPLX1	ENSG00000168993.10	HiC_8hr_4kb	rs113075206	5.06883e-07	chr4	967339	25.2375	302164	0.0312703	rs4690229	0.8413	SLE	chr4:967339-967339	not_differential	FALSE
OCR_116017	chr4	966479	967770	CPLX1	ENSG00000168993.10	HiC_8hr_4kb	rs13137144	1.59946e-07	chr4	967445	27.4652	920438	0.0952541	rs4690229	0.439129	SLE	chr4:967445-967445	not_differential	FALSE
OCR_116017	chr4	966479	967770	DGKQ	ENSG00000145214.9	HiC_0hr_4kb:HiC_8hr_4kb:HiC_24hr_4kb:HiC_0hr_2kb	rs113075206	5.06883e-07	chr4	967339	25.2375	302164	0.0312703	rs4690229	0.8413	SLE	chr4:967339-967339	not_differential	FALSE
OCR_116017	chr4	966479	967770	DGKQ	ENSG00000145214.9	HiC_0hr_4kb:HiC_8hr_4kb:HiC_24hr_4kb:HiC_0hr_2kb	rs13137144	1.59946e-07	chr4	967445	27.4652	920438	0.0952541	rs4690229	0.439129	SLE	chr4:967445-967445	not_differential	FALSE
OCR_116017	chr4	966479	967770	FGFRL1	ENSG00000127418.10	HiC_0hr_4kb:HiC_8hr_4kb	rs113075206	5.06883e-07	chr4	967339	25.2375	302164	0.0312703	rs4690229	0.8413	SLE	chr4:967339-967339	1	FALSE
OCR_116017	chr4	966479	967770	FGFRL1	ENSG00000127418.10	HiC_0hr_4kb:HiC_8hr_4kb	rs13137144	1.59946e-07	chr4	967445	27.4652	920438	0.0952541	rs4690229	0.439129	SLE	chr4:967445-967445	1	FALSE
OCR_116017	chr4	966479	967770	GAK	ENSG00000178950.12	HiC_0hr_2kb:HiC_0hr_4kb:HiC_8hr_4kb:HiC_24hr_4kb	rs113075206	5.06883e-07	chr4	967339	25.2375	302164	0.0312703	rs4690229	0.8413	SLE	chr4:967339-967339	3	FALSE
OCR_116017	chr4	966479	967770	GAK	ENSG00000178950.12	HiC_0hr_2kb:HiC_0hr_4kb:HiC_8hr_4kb:HiC_24hr_4kb	rs13137144	1.59946e-07	chr4	967445	27.4652	920438	0.0952541	rs4690229	0.439129	SLE	chr4:967445-967445	3	FALSE
OCR_116017	chr4	966479	967770	IDUA	ENSG00000127415.8	HiC_0hr_2kb:HiC_0hr_4kb:HiC_8hr_4kb:HiC_24hr_4kb	rs113075206	5.06883e-07	chr4	967339	25.2375	302164	0.0312703	rs4690229	0.8413	SLE	chr4:967339-967339	not_differential	FALSE
OCR_116017	chr4	966479	967770	IDUA	ENSG00000127415.8	HiC_0hr_2kb:HiC_0hr_4kb:HiC_8hr_4kb:HiC_24hr_4kb	rs13137144	1.59946e-07	chr4	967445	27.4652	920438	0.0952541	rs4690229	0.439129	SLE	chr4:967445-967445	not_differential	FALSE
OCR_116017	chr4	966479	967770	MFSD7	ENSG00000169026.8	HiC_24hr_4kb	rs113075206	5.06883e-07	chr4	967339	25.2375	302164	0.0312703	rs4690229	0.8413	SLE	chr4:967339-967339	not_differential	FALSE
OCR_116017	chr4	966479	967770	MFSD7	ENSG00000169026.8	HiC_24hr_4kb	rs13137144	1.59946e-07	chr4	967445	27.4652	920438	0.0952541	rs4690229	0.439129	SLE	chr4:967445-967445	not_differential	FALSE
OCR_116017	chr4	966479	967770	MYL5	ENSG00000215375.2	HiC_0hr_4kb:HiC_8hr_2kb:HiC_8hr_4kb	rs113075206	5.06883e-07	chr4	967339	25.2375	302164	0.0312703	rs4690229	0.8413	SLE	chr4:967339-967339	not_differential	FALSE
OCR_116017	chr4	966479	967770	MYL5	ENSG00000215375.2	HiC_0hr_4kb:HiC_8hr_2kb:HiC_8hr_4kb	rs13137144	1.59946e-07	chr4	967445	27.4652	920438	0.0952541	rs4690229	0.439129	SLE	chr4:967445-967445	not_differential	FALSE
OCR_116017	chr4	966479	967770	PCGF3	ENSG00000185619.13	HiC_0hr_4kb:HiC_8hr_4kb:HiC_24hr_4kb	rs113075206	5.06883e-07	chr4	967339	25.2375	302164	0.0312703	rs4690229	0.8413	SLE	chr4:967339-967339	not_differential	FALSE
OCR_116017	chr4	966479	967770	PCGF3	ENSG00000185619.13	HiC_0hr_4kb:HiC_8hr_4kb:HiC_24hr_4kb	rs13137144	1.59946e-07	chr4	967445	27.4652	920438	0.0952541	rs4690229	0.439129	SLE	chr4:967445-967445	not_differential	FALSE
OCR_116017	chr4	966479	967770	RP11-440L14.1	ENSG00000249592.1	HiC_0hr_2kb:HiC_0hr_4kb:HiC_8hr_4kb:HiC_24hr_4kb	rs113075206	5.06883e-07	chr4	967339	25.2375	302164	0.0312703	rs4690229	0.8413	SLE	chr4:967339-967339	not_differential	FALSE
OCR_116017	chr4	966479	967770	RP11-440L14.1	ENSG00000249592.1	HiC_0hr_2kb:HiC_0hr_4kb:HiC_8hr_4kb:HiC_24hr_4kb	rs13137144	1.59946e-07	chr4	967445	27.4652	920438	0.0952541	rs4690229	0.439129	SLE	chr4:967445-967445	not_differential	FALSE
OCR_116017	chr4	966479	967770	RP11-440L14.3	ENSG00000260262.1	HiC_8hr_4kb:HiC_24hr_4kb	rs113075206	5.06883e-07	chr4	967339	25.2375	302164	0.0312703	rs4690229	0.8413	SLE	chr4:967339-967339	not_differential	FALSE
OCR_116017	chr4	966479	967770	RP11-440L14.3	ENSG00000260262.1	HiC_8hr_4kb:HiC_24hr_4kb	rs13137144	1.59946e-07	chr4	967445	27.4652	920438	0.0952541	rs4690229	0.439129	SLE	chr4:967445-967445	not_differential	FALSE
OCR_116017	chr4	966479	967770	RP11-440L14.4	ENSG00000272588.1	HiC_0hr_4kb:HiC_8hr_4kb:HiC_24hr_4kb	rs113075206	5.06883e-07	chr4	967339	25.2375	302164	0.0312703	rs4690229	0.8413	SLE	chr4:967339-967339	2	FALSE
OCR_116017	chr4	966479	967770	RP11-440L14.4	ENSG00000272588.1	HiC_0hr_4kb:HiC_8hr_4kb:HiC_24hr_4kb	rs13137144	1.59946e-07	chr4	967445	27.4652	920438	0.0952541	rs4690229	0.439129	SLE	chr4:967445-967445	2	FALSE
OCR_116017	chr4	966479	967770	SLC26A1	ENSG00000145217.9	HiC_8hr_4kb:HiC_24hr_4kb	rs113075206	5.06883e-07	chr4	967339	25.2375	302164	0.0312703	rs4690229	0.8413	SLE	chr4:967339-967339	not_differential	FALSE
OCR_116017	chr4	966479	967770	SLC26A1	ENSG00000145217.9	HiC_8hr_4kb:HiC_24hr_4kb	rs13137144	1.59946e-07	chr4	967445	27.4652	920438	0.0952541	rs4690229	0.439129	SLE	chr4:967445-967445	not_differential	FALSE
OCR_116017	chr4	966479	967770	TMEM175	ENSG00000127419.12	HiC_0hr_2kb:HiC_0hr_4kb:HiC_8hr_4kb:HiC_24hr_4kb	rs113075206	5.06883e-07	chr4	967339	25.2375	302164	0.0312703	rs4690229	0.8413	SLE	chr4:967339-967339	4	FALSE
OCR_116017	chr4	966479	967770	TMEM175	ENSG00000127419.12	HiC_0hr_2kb:HiC_0hr_4kb:HiC_8hr_4kb:HiC_24hr_4kb	rs13137144	1.59946e-07	chr4	967445	27.4652	920438	0.0952541	rs4690229	0.439129	SLE	chr4:967445-967445	4	FALSE
OCR_116019	chr4	980368	981420	AC139887.4	ENSG00000233799.1	HiC_0hr_4kb:HiC_8hr_4kb:HiC_24hr_4kb	rs4690220	2.07751e-07	chr4	980464	26.9596	714836	0.0739768	rs4690229	0.673688	SLE	chr4:980464-980464	4	FALSE
OCR_116019	chr4	980368	981420	CPLX1	ENSG00000168993.10	HiC_8hr_4kb:HiC_24hr_4kb	rs4690220	2.07751e-07	chr4	980464	26.9596	714836	0.0739768	rs4690229	0.673688	SLE	chr4:980464-980464	not_differential	FALSE
OCR_116019	chr4	980368	981420	DGKQ	ENSG00000145214.9	HiC_0hr_2kb:HiC_0hr_4kb	rs4690220	2.07751e-07	chr4	980464	26.9596	714836	0.0739768	rs4690229	0.673688	SLE	chr4:980464-980464	not_differential	FALSE
OCR_116019	chr4	980368	981420	FGFRL1	ENSG00000127418.10	HiC_0hr_4kb:HiC_8hr_4kb:HiC_24hr_4kb	rs4690220	2.07751e-07	chr4	980464	26.9596	714836	0.0739768	rs4690229	0.673688	SLE	chr4:980464-980464	1	FALSE
OCR_116019	chr4	980368	981420	GAK	ENSG00000178950.12	HiC_0hr_4kb:HiC_8hr_4kb:HiC_24hr_4kb	rs4690220	2.07751e-07	chr4	980464	26.9596	714836	0.0739768	rs4690229	0.673688	SLE	chr4:980464-980464	3	FALSE
OCR_116019	chr4	980368	981420	IDUA	ENSG00000127415.8	HiC_0hr_4kb:HiC_8hr_4kb:HiC_24hr_2kb:HiC_24hr_4kb	rs4690220	2.07751e-07	chr4	980464	26.9596	714836	0.0739768	rs4690229	0.673688	SLE	chr4:980464-980464	not_differential	FALSE
OCR_116019	chr4	980368	981420	MFSD7	ENSG00000169026.8	HiC_24hr_4kb	rs4690220	2.07751e-07	chr4	980464	26.9596	714836	0.0739768	rs4690229	0.673688	SLE	chr4:980464-980464	not_differential	FALSE
OCR_116019	chr4	980368	981420	MYL5	ENSG00000215375.2	HiC_8hr_4kb:HiC_24hr_4kb	rs4690220	2.07751e-07	chr4	980464	26.9596	714836	0.0739768	rs4690229	0.673688	SLE	chr4:980464-980464	not_differential	FALSE
OCR_116019	chr4	980368	981420	PCGF3	ENSG00000185619.13	HiC_0hr_2kb:HiC_0hr_4kb:HiC_8hr_2kb:HiC_8hr_4kb	rs4690220	2.07751e-07	chr4	980464	26.9596	714836	0.0739768	rs4690229	0.673688	SLE	chr4:980464-980464	not_differential	FALSE
OCR_116019	chr4	980368	981420	RP11-1191J2.4	ENSG00000248416.1	HiC_8hr_4kb	rs4690220	2.07751e-07	chr4	980464	26.9596	714836	0.0739768	rs4690229	0.673688	SLE	chr4:980464-980464	not_differential	FALSE
OCR_116019	chr4	980368	981420	RP11-1191J2.5	ENSG00000272927.1	HiC_8hr_4kb	rs4690220	2.07751e-07	chr4	980464	26.9596	714836	0.0739768	rs4690229	0.673688	SLE	chr4:980464-980464	not_differential	FALSE
OCR_116019	chr4	980368	981420	RP11-440L14.1	ENSG00000249592.1	HiC_0hr_1kb:HiC_0hr_2kb:HiC_0hr_4kb:HiC_8hr_4kb:HiC_24hr_4kb	rs4690220	2.07751e-07	chr4	980464	26.9596	714836	0.0739768	rs4690229	0.673688	SLE	chr4:980464-980464	not_differential	FALSE
OCR_116019	chr4	980368	981420	RP11-440L14.4	ENSG00000272588.1	HiC_0hr_4kb:HiC_8hr_4kb:HiC_24hr_4kb	rs4690220	2.07751e-07	chr4	980464	26.9596	714836	0.0739768	rs4690229	0.673688	SLE	chr4:980464-980464	2	FALSE
OCR_116019	chr4	980368	981420	SLC26A1	ENSG00000145217.9	HiC_24hr_2kb	rs4690220	2.07751e-07	chr4	980464	26.9596	714836	0.0739768	rs4690229	0.673688	SLE	chr4:980464-980464	not_differential	FALSE
OCR_116019	chr4	980368	981420	TMEM175	ENSG00000127419.12	HiC_0hr_4kb:HiC_8hr_4kb	rs4690220	2.07751e-07	chr4	980464	26.9596	714836	0.0739768	rs4690229	0.673688	SLE	chr4:980464-980464	4	FALSE
OCR_116983	chr4	26089967	26090941	RBPJ	ENSG00000168214.16	HiC_0hr_4kb:HiC_8hr_2kb:HiC_8hr_4kb:HiC_24hr_4kb	rs7441808	2e-16	chr4	26090375	67.6026	478328085543213	0.0305222	rs11933540	0.840133	RA	chr4:26090375-26090375	1	FALSE
OCR_117889	chr4	38491550	38492687	AC021860.1	ENSG00000196355.2	HiC_0hr_2kb:HiC_0hr_4kb:HiC_8hr_4kb	rs73245307	0.2211	chr4	38492167	1.49722	2.11406	0.000199021	rs11734570	0.932803	UC	chr4:38492167-38492167	4	FALSE
OCR_117889	chr4	38491550	38492687	KLF3	ENSG00000109787.8	HiC_0hr_2kb:HiC_0hr_4kb:HiC_8hr_4kb	rs73245307	0.2211	chr4	38492167	1.49722	2.11406	0.000199021	rs11734570	0.932803	UC	chr4:38492167-38492167	4	FALSE
OCR_117889	chr4	38491550	38492687	RP11-213G21.1	ENSG00000249667.1	HiC_0hr_4kb	rs73245307	0.2211	chr4	38492167	1.49722	2.11406	0.000199021	rs11734570	0.932803	UC	chr4:38492167-38492167	4	FALSE
OCR_117889	chr4	38491550	38492687	RP11-617D20.1	ENSG00000231160.5	HiC_0hr_2kb:HiC_0hr_4kb:HiC_8hr_4kb	rs73245307	0.2211	chr4	38492167	1.49722	2.11406	0.000199021	rs11734570	0.932803	UC	chr4:38492167-38492167	4	FALSE
OCR_117889	chr4	38491550	38492687	RP11-83C7.1	ENSG00000248227.1	HiC_0hr_4kb:HiC_8hr_4kb	rs73245307	0.2211	chr4	38492167	1.49722	2.11406	0.000199021	rs11734570	0.932803	UC	chr4:38492167-38492167	2	FALSE
OCR_117890	chr4	38510939	38511527	AC021860.1	ENSG00000196355.2	HiC_0hr_1kb:HiC_0hr_2kb:HiC_0hr_4kb:HiC_8hr_4kb	rs13435042	0.2612	chr4	38511045	1.26239	1.87985	0.000176972	rs11734570	0.940675	UC	chr4:38511045-38511045	4	FALSE
OCR_117890	chr4	38510939	38511527	AC021860.1	ENSG00000196355.2	HiC_0hr_1kb:HiC_0hr_2kb:HiC_0hr_4kb:HiC_8hr_4kb	rs2703898	0.2529	chr4	38511326	1.30721	1.92246	0.000180984	rs11734570	0.939425	UC	chr4:38511326-38511326	4	FALSE
OCR_117890	chr4	38510939	38511527	KLF3	ENSG00000109787.8	HiC_0hr_1kb:HiC_0hr_2kb:HiC_0hr_4kb:HiC_8hr_4kb	rs13435042	0.2612	chr4	38511045	1.26239	1.87985	0.000176972	rs11734570	0.940675	UC	chr4:38511045-38511045	4	FALSE
OCR_117890	chr4	38510939	38511527	KLF3	ENSG00000109787.8	HiC_0hr_1kb:HiC_0hr_2kb:HiC_0hr_4kb:HiC_8hr_4kb	rs2703898	0.2529	chr4	38511326	1.30721	1.92246	0.000180984	rs11734570	0.939425	UC	chr4:38511326-38511326	4	FALSE
OCR_117890	chr4	38510939	38511527	RP11-617D20.1	ENSG00000231160.5	HiC_0hr_1kb:HiC_0hr_2kb:HiC_0hr_4kb:HiC_8hr_4kb:HiC_24hr_4kb	rs13435042	0.2612	chr4	38511045	1.26239	1.87985	0.000176972	rs11734570	0.940675	UC	chr4:38511045-38511045	4	FALSE
OCR_117890	chr4	38510939	38511527	RP11-617D20.1	ENSG00000231160.5	HiC_0hr_1kb:HiC_0hr_2kb:HiC_0hr_4kb:HiC_8hr_4kb:HiC_24hr_4kb	rs2703898	0.2529	chr4	38511326	1.30721	1.92246	0.000180984	rs11734570	0.939425	UC	chr4:38511326-38511326	4	FALSE
OCR_117890	chr4	38510939	38511527	RP11-617D20.2	ENSG00000271958.1	HiC_0hr_4kb	rs13435042	0.2612	chr4	38511045	1.26239	1.87985	0.000176972	rs11734570	0.940675	UC	chr4:38511045-38511045	not_differential	FALSE
OCR_117890	chr4	38510939	38511527	RP11-617D20.2	ENSG00000271958.1	HiC_0hr_4kb	rs2703898	0.2529	chr4	38511326	1.30721	1.92246	0.000180984	rs11734570	0.939425	UC	chr4:38511326-38511326	not_differential	FALSE
OCR_117890	chr4	38510939	38511527	RP11-83C7.1	ENSG00000248227.1	HiC_8hr_4kb	rs13435042	0.2612	chr4	38511045	1.26239	1.87985	0.000176972	rs11734570	0.940675	UC	chr4:38511045-38511045	2	FALSE
OCR_117890	chr4	38510939	38511527	RP11-83C7.1	ENSG00000248227.1	HiC_8hr_4kb	rs2703898	0.2529	chr4	38511326	1.30721	1.92246	0.000180984	rs11734570	0.939425	UC	chr4:38511326-38511326	2	FALSE
OCR_117891	chr4	38511677	38512102	AC021860.1	ENSG00000196355.2	HiC_0hr_1kb:HiC_0hr_2kb:HiC_0hr_4kb:HiC_8hr_4kb	rs2637706	0.2471	chr4	38511871	1.33963	1.95387	0.000183941	rs11734570	0.938154	UC	chr4:38511871-38511871	4	FALSE
OCR_117891	chr4	38511677	38512102	KLF3	ENSG00000109787.8	HiC_0hr_1kb:HiC_0hr_2kb:HiC_0hr_4kb:HiC_8hr_4kb	rs2637706	0.2471	chr4	38511871	1.33963	1.95387	0.000183941	rs11734570	0.938154	UC	chr4:38511871-38511871	4	FALSE
OCR_117891	chr4	38511677	38512102	RP11-617D20.1	ENSG00000231160.5	HiC_0hr_1kb:HiC_0hr_2kb:HiC_0hr_4kb:HiC_8hr_4kb:HiC_24hr_4kb	rs2637706	0.2471	chr4	38511871	1.33963	1.95387	0.000183941	rs11734570	0.938154	UC	chr4:38511871-38511871	4	FALSE
OCR_117891	chr4	38511677	38512102	RP11-617D20.2	ENSG00000271958.1	HiC_0hr_4kb	rs2637706	0.2471	chr4	38511871	1.33963	1.95387	0.000183941	rs11734570	0.938154	UC	chr4:38511871-38511871	not_differential	FALSE
OCR_117891	chr4	38511677	38512102	RP11-83C7.1	ENSG00000248227.1	HiC_8hr_4kb	rs2637706	0.2471	chr4	38511871	1.33963	1.95387	0.000183941	rs11734570	0.938154	UC	chr4:38511871-38511871	2	FALSE
OCR_117891	chr4	38511677	38512102	RP11-83C7.2	ENSG00000249534.1	HiC_0hr_4kb	rs2637706	0.2471	chr4	38511871	1.33963	1.95387	0.000183941	rs11734570	0.938154	UC	chr4:38511871-38511871	not_differential	FALSE
OCR_117892	chr4	38512285	38512451	AC021860.1	ENSG00000196355.2	HiC_0hr_2kb:HiC_0hr_4kb:HiC_8hr_4kb	rs2609463	0.1599	chr4	38512322	1.97517	2.68475	0.000252746	rs11734570	0.925022	UC	chr4:38512322-38512322	4	FALSE
OCR_117892	chr4	38512285	38512451	KLF3	ENSG00000109787.8	HiC_0hr_2kb:HiC_0hr_4kb:HiC_8hr_4kb	rs2609463	0.1599	chr4	38512322	1.97517	2.68475	0.000252746	rs11734570	0.925022	UC	chr4:38512322-38512322	4	FALSE
OCR_117892	chr4	38512285	38512451	RP11-617D20.1	ENSG00000231160.5	HiC_0hr_2kb:HiC_0hr_4kb:HiC_8hr_4kb	rs2609463	0.1599	chr4	38512322	1.97517	2.68475	0.000252746	rs11734570	0.925022	UC	chr4:38512322-38512322	4	FALSE
OCR_117892	chr4	38512285	38512451	RP11-617D20.2	ENSG00000271958.1	HiC_0hr_4kb	rs2609463	0.1599	chr4	38512322	1.97517	2.68475	0.000252746	rs11734570	0.925022	UC	chr4:38512322-38512322	not_differential	FALSE
OCR_117892	chr4	38512285	38512451	RP11-83C7.2	ENSG00000249534.1	HiC_0hr_4kb	rs2609463	0.1599	chr4	38512322	1.97517	2.68475	0.000252746	rs11734570	0.925022	UC	chr4:38512322-38512322	not_differential	FALSE
OCR_117897	chr4	38584750	38585095	RP11-600L4.1	ENSG00000251642.1	HiC_8hr_4kb	rs78911499	0.1433	chr4	38584963	2.14216	2.91853	0.000274755	rs11734570	0.923712	UC	chr4:38584963-38584963	not_differential	FALSE
OCR_117897	chr4	38584750	38585095	RP11-83C7.1	ENSG00000248227.1	HiC_0hr_4kb:HiC_8hr_4kb:HiC_24hr_4kb	rs78911499	0.1433	chr4	38584963	2.14216	2.91853	0.000274755	rs11734570	0.923712	UC	chr4:38584963-38584963	2	FALSE
OCR_117897	chr4	38584750	38585095	RP11-83C7.2	ENSG00000249534.1	HiC_0hr_4kb	rs78911499	0.1433	chr4	38584963	2.14216	2.91853	0.000274755	rs11734570	0.923712	UC	chr4:38584963-38584963	not_differential	FALSE
OCR_117899	chr4	38607671	38607847	RP11-213G21.2	ENSG00000251635.1	HiC_8hr_4kb	rs61131231	0.07775	chr4	38607712	3.11132	4.73821	0.000446063	rs11734570	0.911955	UC	chr4:38607712-38607712	not_differential	FALSE
OCR_117899	chr4	38607671	38607847	RP11-600L4.1	ENSG00000251642.1	HiC_8hr_4kb	rs61131231	0.07775	chr4	38607712	3.11132	4.73821	0.000446063	rs11734570	0.911955	UC	chr4:38607712-38607712	not_differential	FALSE
OCR_117899	chr4	38607671	38607847	RP11-83C7.1	ENSG00000248227.1	HiC_8hr_4kb	rs61131231	0.07775	chr4	38607712	3.11132	4.73821	0.000446063	rs11734570	0.911955	UC	chr4:38607712-38607712	2	FALSE
OCR_117899	chr4	38607671	38607847	RP11-83C7.2	ENSG00000249534.1	HiC_0hr_4kb	rs61131231	0.07775	chr4	38607712	3.11132	4.73821	0.000446063	rs11734570	0.911955	UC	chr4:38607712-38607712	not_differential	FALSE
OCR_117900	chr4	38608275	38608460	RP11-617D20.1	ENSG00000231160.5	HiC_0hr_4kb	rs77248011	0.004433	chr4	38608301	8.09735	57.3215	0.00539634	rs11734570	0.792321	UC	chr4:38608301-38608301	4	FALSE
OCR_117900	chr4	38608275	38608460	RP11-617D20.2	ENSG00000271958.1	HiC_0hr_4kb:HiC_8hr_4kb	rs77248011	0.004433	chr4	38608301	8.09735	57.3215	0.00539634	rs11734570	0.792321	UC	chr4:38608301-38608301	not_differential	FALSE
OCR_117900	chr4	38608275	38608460	RP11-83C7.1	ENSG00000248227.1	HiC_0hr_4kb:HiC_8hr_4kb	rs77248011	0.004433	chr4	38608301	8.09735	57.3215	0.00539634	rs11734570	0.792321	UC	chr4:38608301-38608301	2	FALSE
OCR_117901	chr4	38627174	38627865	RP11-213G21.1	ENSG00000249667.1	HiC_0hr_4kb	rs2637713	0.2514	chr4	38627337	1.31551	1.93045	0.000181736	rs11734570	0.9387	UC	chr4:38627337-38627337	4	FALSE
OCR_117901	chr4	38627174	38627865	RP11-213G21.2	ENSG00000251635.1	HiC_0hr_4kb	rs2637713	0.2514	chr4	38627337	1.31551	1.93045	0.000181736	rs11734570	0.9387	UC	chr4:38627337-38627337	not_differential	FALSE
OCR_117901	chr4	38627174	38627865	RP11-600L4.1	ENSG00000251642.1	HiC_0hr_4kb	rs2637713	0.2514	chr4	38627337	1.31551	1.93045	0.000181736	rs11734570	0.9387	UC	chr4:38627337-38627337	not_differential	FALSE
OCR_117901	chr4	38627174	38627865	RP11-83C7.1	ENSG00000248227.1	HiC_0hr_4kb	rs2637713	0.2514	chr4	38627337	1.31551	1.93045	0.000181736	rs11734570	0.9387	UC	chr4:38627337-38627337	2	FALSE
OCR_117901	chr4	38627174	38627865	RP11-83C7.2	ENSG00000249534.1	HiC_0hr_4kb	rs2637713	0.2514	chr4	38627337	1.31551	1.93045	0.000181736	rs11734570	0.9387	UC	chr4:38627337-38627337	not_differential	FALSE
OCR_117901	chr4	38627174	38627865	TBC1D1	ENSG00000065882.11	HiC_8hr_4kb	rs2637713	0.2514	chr4	38627337	1.31551	1.93045	0.000181736	rs11734570	0.9387	UC	chr4:38627337-38627337	not_differential	FALSE
OCR_117904	chr4	38657805	38658066	AC021860.1	ENSG00000196355.2	HiC_0hr_2kb	rs75504410	0.002729	chr4	38657819	8.98034	89.1366	0.00839146	rs11734570	0.760374	UC	chr4:38657819-38657819	4	FALSE
OCR_117904	chr4	38657805	38658066	KLF3	ENSG00000109787.8	HiC_0hr_2kb	rs75504410	0.002729	chr4	38657819	8.98034	89.1366	0.00839146	rs11734570	0.760374	UC	chr4:38657819-38657819	4	FALSE
OCR_117904	chr4	38657805	38658066	RP11-213G21.1	ENSG00000249667.1	HiC_0hr_2kb:HiC_0hr_4kb:HiC_8hr_4kb:HiC_24hr_4kb	rs75504410	0.002729	chr4	38657819	8.98034	89.1366	0.00839146	rs11734570	0.760374	UC	chr4:38657819-38657819	4	FALSE
OCR_117904	chr4	38657805	38658066	RP11-600L4.1	ENSG00000251642.1	HiC_8hr_4kb:HiC_24hr_4kb	rs75504410	0.002729	chr4	38657819	8.98034	89.1366	0.00839146	rs11734570	0.760374	UC	chr4:38657819-38657819	not_differential	FALSE
OCR_117904	chr4	38657805	38658066	RP11-617D20.1	ENSG00000231160.5	HiC_0hr_2kb:HiC_0hr_4kb	rs75504410	0.002729	chr4	38657819	8.98034	89.1366	0.00839146	rs11734570	0.760374	UC	chr4:38657819-38657819	4	FALSE
OCR_117904	chr4	38657805	38658066	RP11-83C7.1	ENSG00000248227.1	HiC_0hr_4kb:HiC_8hr_4kb:HiC_24hr_4kb	rs75504410	0.002729	chr4	38657819	8.98034	89.1366	0.00839146	rs11734570	0.760374	UC	chr4:38657819-38657819	2	FALSE
OCR_117904	chr4	38657805	38658066	RP11-83C7.2	ENSG00000249534.1	HiC_0hr_4kb:HiC_8hr_4kb	rs75504410	0.002729	chr4	38657819	8.98034	89.1366	0.00839146	rs11734570	0.760374	UC	chr4:38657819-38657819	not_differential	FALSE
OCR_117904	chr4	38657805	38658066	TBC1D1	ENSG00000065882.11	HiC_8hr_4kb	rs75504410	0.002729	chr4	38657819	8.98034	89.1366	0.00839146	rs11734570	0.760374	UC	chr4:38657819-38657819	not_differential	FALSE
OCR_117905	chr4	38664646	38666637	AC098680.1	ENSG00000221495.1	HiC_8hr_4kb	rs112691446	0.2395	chr4	38665142	1.38353	1.99724	0.000188024	rs11734570	0.936669	UC	chr4:38665142-38665142	not_differential	FALSE
OCR_117905	chr4	38664646	38666637	RP11-213G21.1	ENSG00000249667.1	HiC_0hr_1kb:HiC_0hr_2kb:HiC_0hr_4kb:HiC_8hr_4kb	rs112691446	0.2395	chr4	38665142	1.38353	1.99724	0.000188024	rs11734570	0.936669	UC	chr4:38665142-38665142	4	FALSE
OCR_117905	chr4	38664646	38666637	RP11-600L4.1	ENSG00000251642.1	HiC_8hr_4kb:HiC_24hr_4kb	rs112691446	0.2395	chr4	38665142	1.38353	1.99724	0.000188024	rs11734570	0.936669	UC	chr4:38665142-38665142	not_differential	FALSE
OCR_117905	chr4	38664646	38666637	RP11-83C7.1	ENSG00000248227.1	HiC_0hr_4kb:HiC_8hr_4kb	rs112691446	0.2395	chr4	38665142	1.38353	1.99724	0.000188024	rs11734570	0.936669	UC	chr4:38665142-38665142	2	FALSE
OCR_117905	chr4	38664646	38666637	RP11-83C7.2	ENSG00000249534.1	HiC_0hr_4kb	rs112691446	0.2395	chr4	38665142	1.38353	1.99724	0.000188024	rs11734570	0.936669	UC	chr4:38665142-38665142	not_differential	FALSE
OCR_117905	chr4	38664646	38666637	TBC1D1	ENSG00000065882.11	HiC_8hr_2kb:HiC_8hr_4kb:HiC_24hr_4kb	rs112691446	0.2395	chr4	38665142	1.38353	1.99724	0.000188024	rs11734570	0.936669	UC	chr4:38665142-38665142	not_differential	FALSE
OCR_117910	chr4	38676361	38676795	AC098680.1	ENSG00000221495.1	HiC_8hr_4kb:HiC_24hr_4kb	rs75067561	0.002622	chr4	38676524	9.05345	92.4551	0.00870388	rs11734570	0.751982	UC	chr4:38676524-38676524	not_differential	FALSE
OCR_117910	chr4	38676361	38676795	AC098680.1	ENSG00000221495.1	HiC_8hr_4kb:HiC_24hr_4kb	rs140286403	0.1313	chr4	38676664	2.27707	3.12219	0.000293928	rs11734570	0.921727	UC	chr4:38676664-38676664	not_differential	FALSE
OCR_117910	chr4	38676361	38676795	RP11-213G21.1	ENSG00000249667.1	HiC_0hr_2kb:HiC_0hr_4kb:HiC_8hr_4kb	rs75067561	0.002622	chr4	38676524	9.05345	92.4551	0.00870388	rs11734570	0.751982	UC	chr4:38676524-38676524	4	FALSE
OCR_117910	chr4	38676361	38676795	RP11-213G21.1	ENSG00000249667.1	HiC_0hr_2kb:HiC_0hr_4kb:HiC_8hr_4kb	rs140286403	0.1313	chr4	38676664	2.27707	3.12219	0.000293928	rs11734570	0.921727	UC	chr4:38676664-38676664	4	FALSE
OCR_117910	chr4	38676361	38676795	RP11-600L4.1	ENSG00000251642.1	HiC_0hr_4kb:HiC_8hr_4kb:HiC_24hr_4kb	rs75067561	0.002622	chr4	38676524	9.05345	92.4551	0.00870388	rs11734570	0.751982	UC	chr4:38676524-38676524	not_differential	FALSE
OCR_117910	chr4	38676361	38676795	RP11-600L4.1	ENSG00000251642.1	HiC_0hr_4kb:HiC_8hr_4kb:HiC_24hr_4kb	rs140286403	0.1313	chr4	38676664	2.27707	3.12219	0.000293928	rs11734570	0.921727	UC	chr4:38676664-38676664	not_differential	FALSE
OCR_117910	chr4	38676361	38676795	RP11-83C7.1	ENSG00000248227.1	HiC_0hr_4kb:HiC_8hr_4kb	rs75067561	0.002622	chr4	38676524	9.05345	92.4551	0.00870388	rs11734570	0.751982	UC	chr4:38676524-38676524	2	FALSE
OCR_117910	chr4	38676361	38676795	RP11-83C7.1	ENSG00000248227.1	HiC_0hr_4kb:HiC_8hr_4kb	rs140286403	0.1313	chr4	38676664	2.27707	3.12219	0.000293928	rs11734570	0.921727	UC	chr4:38676664-38676664	2	FALSE
OCR_117910	chr4	38676361	38676795	RP11-83C7.2	ENSG00000249534.1	HiC_0hr_4kb	rs75067561	0.002622	chr4	38676524	9.05345	92.4551	0.00870388	rs11734570	0.751982	UC	chr4:38676524-38676524	not_differential	FALSE
OCR_117910	chr4	38676361	38676795	RP11-83C7.2	ENSG00000249534.1	HiC_0hr_4kb	rs140286403	0.1313	chr4	38676664	2.27707	3.12219	0.000293928	rs11734570	0.921727	UC	chr4:38676664-38676664	not_differential	FALSE
OCR_117910	chr4	38676361	38676795	TBC1D1	ENSG00000065882.11	HiC_0hr_4kb:HiC_8hr_4kb:HiC_24hr_4kb	rs75067561	0.002622	chr4	38676524	9.05345	92.4551	0.00870388	rs11734570	0.751982	UC	chr4:38676524-38676524	not_differential	FALSE
OCR_117910	chr4	38676361	38676795	TBC1D1	ENSG00000065882.11	HiC_0hr_4kb:HiC_8hr_4kb:HiC_24hr_4kb	rs140286403	0.1313	chr4	38676664	2.27707	3.12219	0.000293928	rs11734570	0.921727	UC	chr4:38676664-38676664	not_differential	FALSE
OCR_117911	chr4	38677216	38677505	AC098680.1	ENSG00000221495.1	HiC_8hr_4kb:HiC_24hr_4kb	rs760384222	0.2442	chr4	38677272	1.35618	1.97011	0.00018547	rs11734570	0.937415	UC	chr4:38677272-38677272	not_differential	FALSE
OCR_117911	chr4	38677216	38677505	RP11-213G21.1	ENSG00000249667.1	HiC_0hr_2kb:HiC_0hr_4kb:HiC_8hr_4kb	rs760384222	0.2442	chr4	38677272	1.35618	1.97011	0.00018547	rs11734570	0.937415	UC	chr4:38677272-38677272	4	FALSE
OCR_117911	chr4	38677216	38677505	RP11-600L4.1	ENSG00000251642.1	HiC_0hr_4kb:HiC_8hr_4kb:HiC_24hr_4kb	rs760384222	0.2442	chr4	38677272	1.35618	1.97011	0.00018547	rs11734570	0.937415	UC	chr4:38677272-38677272	not_differential	FALSE
OCR_117911	chr4	38677216	38677505	RP11-83C7.1	ENSG00000248227.1	HiC_0hr_4kb:HiC_8hr_4kb	rs760384222	0.2442	chr4	38677272	1.35618	1.97011	0.00018547	rs11734570	0.937415	UC	chr4:38677272-38677272	2	FALSE
OCR_117911	chr4	38677216	38677505	RP11-83C7.2	ENSG00000249534.1	HiC_0hr_4kb	rs760384222	0.2442	chr4	38677272	1.35618	1.97011	0.00018547	rs11734570	0.937415	UC	chr4:38677272-38677272	not_differential	FALSE
OCR_117911	chr4	38677216	38677505	TBC1D1	ENSG00000065882.11	HiC_0hr_4kb:HiC_8hr_4kb:HiC_24hr_4kb	rs760384222	0.2442	chr4	38677272	1.35618	1.97011	0.00018547	rs11734570	0.937415	UC	chr4:38677272-38677272	not_differential	FALSE
OCR_118034	chr4	40307272	40307780	N4BP2	ENSG00000078177.9	HiC_0hr_4kb:HiC_8hr_2kb:HiC_8hr_4kb:HiC_24hr_4kb	rs13136820	1.72e-11	chr4	40307564	45.2661	6.75166e+09	0.324311	rs13136820	0.324311	VIT	chr4:40307564-40307564	not_differential	FALSE
OCR_118034	chr4	40307272	40307780	N4BP2	ENSG00000078177.9	HiC_0hr_4kb:HiC_8hr_2kb:HiC_8hr_4kb:HiC_24hr_4kb	4:40307586:I	2.08e-11	chr4	40307586	44.8939	5.60527e+09	0.269245	rs13136820	0.593556	VIT	chr4:40307586-40307586	not_differential	FALSE
OCR_118034	chr4	40307272	40307780	N4BP2	ENSG00000078177.9	HiC_0hr_4kb:HiC_8hr_2kb:HiC_8hr_4kb:HiC_24hr_4kb	rs113284964	2.08e-11	chr4	40307587	44.8939	5.60527e+09	0.269245	rs13136820	0.862801	VIT	chr4:40307587-40307587	not_differential	FALSE
OCR_118034	chr4	40307272	40307780	RHOH	ENSG00000168421.8	HiC_0hr_2kb:HiC_0hr_4kb:HiC_8hr_2kb:HiC_8hr_4kb:HiC_24hr_4kb	rs13136820	1.72e-11	chr4	40307564	45.2661	6.75166e+09	0.324311	rs13136820	0.324311	VIT	chr4:40307564-40307564	not_differential	FALSE
OCR_118034	chr4	40307272	40307780	RHOH	ENSG00000168421.8	HiC_0hr_2kb:HiC_0hr_4kb:HiC_8hr_2kb:HiC_8hr_4kb:HiC_24hr_4kb	4:40307586:I	2.08e-11	chr4	40307586	44.8939	5.60527e+09	0.269245	rs13136820	0.593556	VIT	chr4:40307586-40307586	not_differential	FALSE
OCR_118034	chr4	40307272	40307780	RHOH	ENSG00000168421.8	HiC_0hr_2kb:HiC_0hr_4kb:HiC_8hr_2kb:HiC_8hr_4kb:HiC_24hr_4kb	rs113284964	2.08e-11	chr4	40307587	44.8939	5.60527e+09	0.269245	rs13136820	0.862801	VIT	chr4:40307587-40307587	not_differential	FALSE
OCR_118034	chr4	40307272	40307780	RP11-395I6.2	ENSG00000250338.1	HiC_0hr_4kb:HiC_8hr_4kb:HiC_24hr_4kb	rs13136820	1.72e-11	chr4	40307564	45.2661	6.75166e+09	0.324311	rs13136820	0.324311	VIT	chr4:40307564-40307564	not_differential	FALSE
OCR_118034	chr4	40307272	40307780	RP11-395I6.2	ENSG00000250338.1	HiC_0hr_4kb:HiC_8hr_4kb:HiC_24hr_4kb	4:40307586:I	2.08e-11	chr4	40307586	44.8939	5.60527e+09	0.269245	rs13136820	0.593556	VIT	chr4:40307586-40307586	not_differential	FALSE
OCR_118034	chr4	40307272	40307780	RP11-395I6.2	ENSG00000250338.1	HiC_0hr_4kb:HiC_8hr_4kb:HiC_24hr_4kb	rs113284964	2.08e-11	chr4	40307587	44.8939	5.60527e+09	0.269245	rs13136820	0.862801	VIT	chr4:40307587-40307587	not_differential	FALSE
OCR_118034	chr4	40307272	40307780	RP11-395I6.3	ENSG00000260296.1	HiC_0hr_4kb:HiC_8hr_4kb:HiC_24hr_4kb	rs13136820	1.72e-11	chr4	40307564	45.2661	6.75166e+09	0.324311	rs13136820	0.324311	VIT	chr4:40307564-40307564	4	FALSE
OCR_118034	chr4	40307272	40307780	RP11-395I6.3	ENSG00000260296.1	HiC_0hr_4kb:HiC_8hr_4kb:HiC_24hr_4kb	4:40307586:I	2.08e-11	chr4	40307586	44.8939	5.60527e+09	0.269245	rs13136820	0.593556	VIT	chr4:40307586-40307586	4	FALSE
OCR_118034	chr4	40307272	40307780	RP11-395I6.3	ENSG00000260296.1	HiC_0hr_4kb:HiC_8hr_4kb:HiC_24hr_4kb	rs113284964	2.08e-11	chr4	40307587	44.8939	5.60527e+09	0.269245	rs13136820	0.862801	VIT	chr4:40307587-40307587	4	FALSE
OCR_118431	chr4	48143103	48143310	CNGA1	ENSG00000198515.9	HiC_8hr_4kb	rs17470892	0.00012	chr4	48143201	14.7927	1630.01	0.00299278	rs2664035	0.933832	RA	chr4:48143201-48143201	not_differential	FALSE
OCR_118431	chr4	48143103	48143310	NFXL1	ENSG00000170448.7	HiC_0hr_4kb	rs17470892	0.00012	chr4	48143201	14.7927	1630.01	0.00299278	rs2664035	0.933832	RA	chr4:48143201-48143201	not_differential	FALSE
OCR_118431	chr4	48143103	48143310	NIPAL1	ENSG00000163293.7	HiC_0hr_4kb:HiC_8hr_4kb	rs17470892	0.00012	chr4	48143201	14.7927	1630.01	0.00299278	rs2664035	0.933832	RA	chr4:48143201-48143201	1	FALSE
OCR_118431	chr4	48143103	48143310	RNU6-838P	ENSG00000200269.1	HiC_0hr_4kb:HiC_8hr_4kb	rs17470892	0.00012	chr4	48143201	14.7927	1630.01	0.00299278	rs2664035	0.933832	RA	chr4:48143201-48143201	not_differential	FALSE
OCR_118431	chr4	48143103	48143310	RNU6-868P	ENSG00000253050.1	HiC_0hr_2kb:HiC_0hr_4kb:HiC_8hr_4kb	rs17470892	0.00012	chr4	48143201	14.7927	1630.01	0.00299278	rs2664035	0.933832	RA	chr4:48143201-48143201	not_differential	FALSE
OCR_118431	chr4	48143103	48143310	TXK	ENSG00000074966.6	HiC_0hr_4kb	rs17470892	0.00012	chr4	48143201	14.7927	1630.01	0.00299278	rs2664035	0.933832	RA	chr4:48143201-48143201	4	FALSE
OCR_118443	chr4	48317906	48318493	FRYL	ENSG00000075539.9	HiC_8hr_4kb	chr4:48318177	0.00013	chr4	48318177	14.6418	1511.55	0.00277528	rs2664035	0.942376	RA	chr4:48318177-48318177	not_differential	FALSE
OCR_121597	chr4	102267443	102267696	BANK1	ENSG00000153064.7	HiC_0hr_4kb	rs2583391	7.67e-05	chr4	102267453	15.6379	2487.35	0.00352164	rs1031034	0.802442	VIT	chr4:102267453-102267453	not_differential	FALSE
OCR_121597	chr4	102267443	102267696	MANBA	ENSG00000109323.4	HiC_0hr_4kb	rs2583391	7.67e-05	chr4	102267453	15.6379	2487.35	0.00352164	rs1031034	0.802442	VIT	chr4:102267453-102267453	4	FALSE
OCR_121597	chr4	102267443	102267696	MIR1255A	ENSG00000221265.1	HiC_0hr_4kb	rs2583391	7.67e-05	chr4	102267453	15.6379	2487.35	0.00352164	rs1031034	0.802442	VIT	chr4:102267453-102267453	not_differential	FALSE
OCR_121597	chr4	102267443	102267696	PPP3CA	ENSG00000138814.12	HiC_0hr_4kb	rs2583391	7.67e-05	chr4	102267453	15.6379	2487.35	0.00352164	rs1031034	0.802442	VIT	chr4:102267453-102267453	not_differential	FALSE
OCR_121597	chr4	102267443	102267696	RN7SL728P	ENSG00000241144.2	HiC_0hr_4kb	rs2583391	7.67e-05	chr4	102267453	15.6379	2487.35	0.00352164	rs1031034	0.802442	VIT	chr4:102267453-102267453	not_differential	FALSE
OCR_121597	chr4	102267443	102267696	SLC39A8	ENSG00000138821.8	HiC_0hr_4kb	rs2583391	7.67e-05	chr4	102267453	15.6379	2487.35	0.00352164	rs1031034	0.802442	VIT	chr4:102267453-102267453	5	FALSE
OCR_121599	chr4	102268006	102269621	BANK1	ENSG00000153064.7	HiC_0hr_4kb	rs2850328	3.3e-05	chr4	102268940	17.2367	5532.24	0.00783266	rs1031034	0.755579	VIT	chr4:102268940-102268940	not_differential	FALSE
OCR_121599	chr4	102268006	102269621	DNAJB14	ENSG00000164031.12	HiC_0hr_4kb	rs2850328	3.3e-05	chr4	102268940	17.2367	5532.24	0.00783266	rs1031034	0.755579	VIT	chr4:102268940-102268940	not_differential	FALSE
OCR_121599	chr4	102268006	102269621	H2AFZ	ENSG00000164032.7	HiC_0hr_4kb	rs2850328	3.3e-05	chr4	102268940	17.2367	5532.24	0.00783266	rs1031034	0.755579	VIT	chr4:102268940-102268940	5	FALSE
OCR_121599	chr4	102268006	102269621	MANBA	ENSG00000109323.4	HiC_0hr_4kb	rs2850328	3.3e-05	chr4	102268940	17.2367	5532.24	0.00783266	rs1031034	0.755579	VIT	chr4:102268940-102268940	4	FALSE
OCR_121599	chr4	102268006	102269621	RP11-10L12.4	ENSG00000246560.2	HiC_0hr_4kb	rs2850328	3.3e-05	chr4	102268940	17.2367	5532.24	0.00783266	rs1031034	0.755579	VIT	chr4:102268940-102268940	not_differential	FALSE
OCR_121599	chr4	102268006	102269621	RP11-15B17.1	ENSG00000245322.2	HiC_0hr_4kb	rs2850328	3.3e-05	chr4	102268940	17.2367	5532.24	0.00783266	rs1031034	0.755579	VIT	chr4:102268940-102268940	not_differential	FALSE
OCR_121599	chr4	102268006	102269621	SLC39A8	ENSG00000138821.8	HiC_0hr_2kb:HiC_0hr_4kb	rs2850328	3.3e-05	chr4	102268940	17.2367	5532.24	0.00783266	rs1031034	0.755579	VIT	chr4:102268940-102268940	5	FALSE
OCR_121599	chr4	102268006	102269621	SLC9B1	ENSG00000164037.12	HiC_0hr_4kb	rs2850328	3.3e-05	chr4	102268940	17.2367	5532.24	0.00783266	rs1031034	0.755579	VIT	chr4:102268940-102268940	not_differential	FALSE
OCR_121599	chr4	102268006	102269621	UBE2D3	ENSG00000109332.15	HiC_0hr_4kb	rs2850328	3.3e-05	chr4	102268940	17.2367	5532.24	0.00783266	rs1031034	0.755579	VIT	chr4:102268940-102268940	1	FALSE
OCR_121689	chr4	103540216	103540588	AF213884.2	ENSG00000260651.1	HiC_0hr_4kb:HiC_8hr_4kb:HiC_24hr_4kb	rs7674004	4.976e-09	chr4	103540313	34.1988	2.66791e+07	0.00493972	rs227275	0.822287	ALG	chr4:103540313-103540313	not_differential	FALSE
OCR_121689	chr4	103540216	103540588	BDH2	ENSG00000164039.10	HiC_0hr_4kb:HiC_8hr_4kb	rs7674004	4.976e-09	chr4	103540313	34.1988	2.66791e+07	0.00493972	rs227275	0.822287	ALG	chr4:103540313-103540313	4	FALSE
OCR_121689	chr4	103540216	103540588	NFKB1	ENSG00000109320.7	HiC_0hr_4kb:HiC_8hr_4kb:HiC_24hr_4kb	rs7674004	4.976e-09	chr4	103540313	34.1988	2.66791e+07	0.00493972	rs227275	0.822287	ALG	chr4:103540313-103540313	1	FALSE
OCR_121689	chr4	103540216	103540588	RP11-10L12.4	ENSG00000246560.2	HiC_0hr_4kb:HiC_24hr_4kb	rs7674004	4.976e-09	chr4	103540313	34.1988	2.66791e+07	0.00493972	rs227275	0.822287	ALG	chr4:103540313-103540313	not_differential	FALSE
OCR_121689	chr4	103540216	103540588	RP11-499E18.1	ENSG00000248161.1	HiC_0hr_2kb:HiC_0hr_4kb:HiC_8hr_2kb:HiC_8hr_4kb:HiC_24hr_2kb:HiC_24hr_4kb	rs7674004	4.976e-09	chr4	103540313	34.1988	2.66791e+07	0.00493972	rs227275	0.822287	ALG	chr4:103540313-103540313	not_differential	FALSE
OCR_121689	chr4	103540216	103540588	SLC39A8	ENSG00000138821.8	HiC_0hr_4kb:HiC_8hr_4kb:HiC_24hr_4kb	rs7674004	4.976e-09	chr4	103540313	34.1988	2.66791e+07	0.00493972	rs227275	0.822287	ALG	chr4:103540313-103540313	5	FALSE
OCR_121689	chr4	103540216	103540588	SLC9B1	ENSG00000164037.12	HiC_0hr_4kb:HiC_8hr_4kb:HiC_24hr_4kb	rs7674004	4.976e-09	chr4	103540313	34.1988	2.66791e+07	0.00493972	rs227275	0.822287	ALG	chr4:103540313-103540313	not_differential	FALSE
OCR_121689	chr4	103540216	103540588	SLC9B2	ENSG00000164038.10	HiC_0hr_4kb:HiC_8hr_4kb:HiC_24hr_4kb	rs7674004	4.976e-09	chr4	103540313	34.1988	2.66791e+07	0.00493972	rs227275	0.822287	ALG	chr4:103540313-103540313	1	FALSE
OCR_121689	chr4	103540216	103540588	UBE2D3	ENSG00000109332.15	HiC_0hr_4kb:HiC_24hr_4kb	rs7674004	4.976e-09	chr4	103540313	34.1988	2.66791e+07	0.00493972	rs227275	0.822287	ALG	chr4:103540313-103540313	1	FALSE
OCR_121696	chr4	103551650	103552409	AF213884.2	ENSG00000260651.1	HiC_0hr_2kb:HiC_0hr_4kb:HiC_8hr_4kb	rs7665659	8.256e-09	chr4	103551818	33.2139	1.63041e+07	0.00301876	rs227275	0.879939	ALG	chr4:103551818-103551818	not_differential	FALSE
OCR_121696	chr4	103551650	103552409	AF213884.2	ENSG00000260651.1	HiC_0hr_2kb:HiC_0hr_4kb:HiC_8hr_4kb	rs7690700	1.093e-08	chr4	103552068	32.6684	1.24123e+07	0.00229817	rs227275	0.943256	ALG	chr4:103552068-103552068	not_differential	FALSE
OCR_121696	chr4	103551650	103552409	BDH2	ENSG00000164039.10	HiC_0hr_4kb:HiC_8hr_4kb	rs7665659	8.256e-09	chr4	103551818	33.2139	1.63041e+07	0.00301876	rs227275	0.879939	ALG	chr4:103551818-103551818	4	FALSE
OCR_121696	chr4	103551650	103552409	BDH2	ENSG00000164039.10	HiC_0hr_4kb:HiC_8hr_4kb	rs7690700	1.093e-08	chr4	103552068	32.6684	1.24123e+07	0.00229817	rs227275	0.943256	ALG	chr4:103552068-103552068	4	FALSE
OCR_121696	chr4	103551650	103552409	CISD2	ENSG00000145354.5	HiC_0hr_4kb:HiC_8hr_4kb	rs7665659	8.256e-09	chr4	103551818	33.2139	1.63041e+07	0.00301876	rs227275	0.879939	ALG	chr4:103551818-103551818	3	FALSE
OCR_121696	chr4	103551650	103552409	CISD2	ENSG00000145354.5	HiC_0hr_4kb:HiC_8hr_4kb	rs7690700	1.093e-08	chr4	103552068	32.6684	1.24123e+07	0.00229817	rs227275	0.943256	ALG	chr4:103552068-103552068	3	FALSE
OCR_121696	chr4	103551650	103552409	MANBA	ENSG00000109323.4	HiC_0hr_4kb	rs7665659	8.256e-09	chr4	103551818	33.2139	1.63041e+07	0.00301876	rs227275	0.879939	ALG	chr4:103551818-103551818	4	FALSE
OCR_121696	chr4	103551650	103552409	MANBA	ENSG00000109323.4	HiC_0hr_4kb	rs7690700	1.093e-08	chr4	103552068	32.6684	1.24123e+07	0.00229817	rs227275	0.943256	ALG	chr4:103552068-103552068	4	FALSE
OCR_121696	chr4	103551650	103552409	NFKB1	ENSG00000109320.7	HiC_0hr_2kb:HiC_0hr_4kb:HiC_8hr_4kb	rs7665659	8.256e-09	chr4	103551818	33.2139	1.63041e+07	0.00301876	rs227275	0.879939	ALG	chr4:103551818-103551818	1	FALSE
OCR_121696	chr4	103551650	103552409	NFKB1	ENSG00000109320.7	HiC_0hr_2kb:HiC_0hr_4kb:HiC_8hr_4kb	rs7690700	1.093e-08	chr4	103552068	32.6684	1.24123e+07	0.00229817	rs227275	0.943256	ALG	chr4:103552068-103552068	1	FALSE
OCR_121696	chr4	103551650	103552409	RN7SL728P	ENSG00000241144.2	HiC_8hr_4kb	rs7665659	8.256e-09	chr4	103551818	33.2139	1.63041e+07	0.00301876	rs227275	0.879939	ALG	chr4:103551818-103551818	not_differential	FALSE
OCR_121696	chr4	103551650	103552409	RN7SL728P	ENSG00000241144.2	HiC_8hr_4kb	rs7690700	1.093e-08	chr4	103552068	32.6684	1.24123e+07	0.00229817	rs227275	0.943256	ALG	chr4:103552068-103552068	not_differential	FALSE
OCR_121696	chr4	103551650	103552409	RP11-10L12.4	ENSG00000246560.2	HiC_0hr_4kb:HiC_8hr_4kb:HiC_24hr_4kb	rs7665659	8.256e-09	chr4	103551818	33.2139	1.63041e+07	0.00301876	rs227275	0.879939	ALG	chr4:103551818-103551818	not_differential	FALSE
OCR_121696	chr4	103551650	103552409	RP11-10L12.4	ENSG00000246560.2	HiC_0hr_4kb:HiC_8hr_4kb:HiC_24hr_4kb	rs7690700	1.093e-08	chr4	103552068	32.6684	1.24123e+07	0.00229817	rs227275	0.943256	ALG	chr4:103552068-103552068	not_differential	FALSE
OCR_121696	chr4	103551650	103552409	RP11-499E18.1	ENSG00000248161.1	HiC_0hr_2kb:HiC_0hr_4kb:HiC_8hr_2kb:HiC_8hr_4kb:HiC_24hr_4kb	rs7665659	8.256e-09	chr4	103551818	33.2139	1.63041e+07	0.00301876	rs227275	0.879939	ALG	chr4:103551818-103551818	not_differential	FALSE
OCR_121696	chr4	103551650	103552409	RP11-499E18.1	ENSG00000248161.1	HiC_0hr_2kb:HiC_0hr_4kb:HiC_8hr_2kb:HiC_8hr_4kb:HiC_24hr_4kb	rs7690700	1.093e-08	chr4	103552068	32.6684	1.24123e+07	0.00229817	rs227275	0.943256	ALG	chr4:103552068-103552068	not_differential	FALSE
OCR_121696	chr4	103551650	103552409	SLC39A8	ENSG00000138821.8	HiC_0hr_4kb:HiC_8hr_4kb:HiC_24hr_4kb	rs7665659	8.256e-09	chr4	103551818	33.2139	1.63041e+07	0.00301876	rs227275	0.879939	ALG	chr4:103551818-103551818	5	FALSE
OCR_121696	chr4	103551650	103552409	SLC39A8	ENSG00000138821.8	HiC_0hr_4kb:HiC_8hr_4kb:HiC_24hr_4kb	rs7690700	1.093e-08	chr4	103552068	32.6684	1.24123e+07	0.00229817	rs227275	0.943256	ALG	chr4:103552068-103552068	5	FALSE
OCR_121696	chr4	103551650	103552409	SLC9B1	ENSG00000164037.12	HiC_0hr_4kb:HiC_8hr_2kb:HiC_8hr_4kb:HiC_24hr_4kb	rs7665659	8.256e-09	chr4	103551818	33.2139	1.63041e+07	0.00301876	rs227275	0.879939	ALG	chr4:103551818-103551818	not_differential	FALSE
OCR_121696	chr4	103551650	103552409	SLC9B1	ENSG00000164037.12	HiC_0hr_4kb:HiC_8hr_2kb:HiC_8hr_4kb:HiC_24hr_4kb	rs7690700	1.093e-08	chr4	103552068	32.6684	1.24123e+07	0.00229817	rs227275	0.943256	ALG	chr4:103552068-103552068	not_differential	FALSE
OCR_121696	chr4	103551650	103552409	SLC9B2	ENSG00000164038.10	HiC_0hr_2kb:HiC_0hr_4kb:HiC_8hr_4kb:HiC_24hr_4kb	rs7665659	8.256e-09	chr4	103551818	33.2139	1.63041e+07	0.00301876	rs227275	0.879939	ALG	chr4:103551818-103551818	1	FALSE
OCR_121696	chr4	103551650	103552409	SLC9B2	ENSG00000164038.10	HiC_0hr_2kb:HiC_0hr_4kb:HiC_8hr_4kb:HiC_24hr_4kb	rs7690700	1.093e-08	chr4	103552068	32.6684	1.24123e+07	0.00229817	rs227275	0.943256	ALG	chr4:103552068-103552068	1	FALSE
OCR_121696	chr4	103551650	103552409	UBE2D3	ENSG00000109332.15	HiC_0hr_4kb:HiC_8hr_4kb:HiC_24hr_4kb	rs7665659	8.256e-09	chr4	103551818	33.2139	1.63041e+07	0.00301876	rs227275	0.879939	ALG	chr4:103551818-103551818	1	FALSE
OCR_121696	chr4	103551650	103552409	UBE2D3	ENSG00000109332.15	HiC_0hr_4kb:HiC_8hr_4kb:HiC_24hr_4kb	rs7690700	1.093e-08	chr4	103552068	32.6684	1.24123e+07	0.00229817	rs227275	0.943256	ALG	chr4:103552068-103552068	1	FALSE
OCR_123129	chr4	123370768	123372561	KIAA1109	ENSG00000138688.11	HiC_8hr_4kb	rs11575812	0.01614	chr4	123371049	5.78756	18.0614	0.0126794	rs1479924	0.662276	JIA	chr4:123371049-123371049	4	FALSE
OCR_123129	chr4	123370768	123372561	KIAA1109	ENSG00000138688.11	HiC_8hr_4kb	rs11575810	0.4615	chr4	123371292	0.542254	1.31144	0.000920651	rs1479924	0.93871	JIA	chr4:123371292-123371292	4	FALSE
OCR_123129	chr4	123370768	123372561	KIAA1109	ENSG00000138688.11	HiC_8hr_4kb	rs11575810	4.1e-06	chr4	123371292	21.2175	40487.9	0.0104344	rs45475795	0.37262	RA	chr4:123371292-123371292	4	FALSE
OCR_123129	chr4	123370768	123372561	KIAA1109	ENSG00000138688.11	HiC_8hr_4kb	rs2069776	0.01799	chr4	123371976	5.59712	16.421	0.0115278	rs1479924	0.757671	JIA	chr4:123371976-123371976	4	FALSE
OCR_123136	chr4	123428606	123429861	IL2	ENSG00000109471.4	HiC_8hr_4kb:HiC_24hr_4kb	rs72669153	1.201e-10	chr4	123429029	41.4634	1.00846e+09	0.0443844	rs1479918	0.857308	IBD	chr4:123429029-123429029	1	FALSE
OCR_123136	chr4	123428606	123429861	IL2	ENSG00000109471.4	HiC_8hr_4kb:HiC_24hr_4kb	rs72669153	0.1359	chr4	123429029	2.22378	3.0401	0.00213419	rs1479924	0.874259	JIA	chr4:123429029-123429029	1	FALSE
OCR_123136	chr4	123428606	123429861	IL2	ENSG00000109471.4	HiC_8hr_4kb:HiC_24hr_4kb	rs72669153	3.805e-07	chr4	123429029	25.7908	398473	0.161249	rs1479918	0.161249	UC	chr4:123429029-123429029	1	FALSE
OCR_123136	chr4	123428606	123429861	IL2	ENSG00000109471.4	HiC_8hr_4kb:HiC_24hr_4kb	rs79212788	0.4609	chr4	123429138	0.543708	1.3124	0.000921321	rs1479924	0.935026	JIA	chr4:123429138-123429138	1	FALSE
OCR_123136	chr4	123428606	123429861	IL2	ENSG00000109471.4	HiC_8hr_4kb:HiC_24hr_4kb	chr4:123429138	3.8e-06	chr4	123429138	21.3632	43546.7	0.0112227	rs45475795	0.24089	RA	chr4:123429138-123429138	1	FALSE
OCR_123141	chr4	123463460	123464365	IL2	ENSG00000109471.4	HiC_8hr_4kb:HiC_24hr_2kb:HiC_24hr_4kb	rs62322750	0.4703	chr4	123464169	0.521271	1.29775	0.000911043	rs1479924	0.9488	JIA	chr4:123464169-123464169	1	FALSE
OCR_123141	chr4	123463460	123464365	IL2	ENSG00000109471.4	HiC_8hr_4kb:HiC_24hr_2kb:HiC_24hr_4kb	rs62322750	4.1e-06	chr4	123464169	21.2175	40487.9	0.0104344	rs45475795	0.403923	RA	chr4:123464169-123464169	1	FALSE
OCR_123143	chr4	123473243	123473810	IL2	ENSG00000109471.4	HiC_8hr_4kb:HiC_24hr_2kb:HiC_24hr_4kb	rs13144509	3.05e-06	chr4	123473487	21.7848	53767.4	0.0233218	rs17389644	0.729609	ECZ	chr4:123473487-123473487	1	FALSE
OCR_123143	chr4	123473243	123473810	IL2	ENSG00000109471.4	HiC_8hr_4kb:HiC_24hr_2kb:HiC_24hr_4kb	rs13144509	0.01319	chr4	123473487	6.14345	21.5791	0.0151488	rs1479924	0.623103	JIA	chr4:123473487-123473487	1	FALSE
OCR_123143	chr4	123473243	123473810	KIAA1109	ENSG00000138688.11	HiC_8hr_4kb:HiC_24hr_4kb	rs13144509	3.05e-06	chr4	123473487	21.7848	53767.4	0.0233218	rs17389644	0.729609	ECZ	chr4:123473487-123473487	4	FALSE
OCR_123143	chr4	123473243	123473810	KIAA1109	ENSG00000138688.11	HiC_8hr_4kb:HiC_24hr_4kb	rs13144509	0.01319	chr4	123473487	6.14345	21.5791	0.0151488	rs1479924	0.623103	JIA	chr4:123473487-123473487	4	FALSE
OCR_123147	chr4	123498059	123498310	BBS7	ENSG00000138686.5	HiC_0hr_4kb	rs45437792	6.4e-06	chr4	123498293	20.3647	26432.3	0.00681204	rs45475795	0.907857	RA	chr4:123498293-123498293	5	FALSE
OCR_123147	chr4	123498059	123498310	EXOSC9	ENSG00000123737.8	HiC_0hr_4kb	rs45437792	6.4e-06	chr4	123498293	20.3647	26432.3	0.00681204	rs45475795	0.907857	RA	chr4:123498293-123498293	3	FALSE
OCR_123147	chr4	123498059	123498310	IL2	ENSG00000109471.4	HiC_8hr_4kb:HiC_24hr_4kb	rs45437792	6.4e-06	chr4	123498293	20.3647	26432.3	0.00681204	rs45475795	0.907857	RA	chr4:123498293-123498293	1	FALSE
OCR_123147	chr4	123498059	123498310	KIAA1109	ENSG00000138688.11	HiC_0hr_4kb:HiC_8hr_4kb:HiC_24hr_2kb:HiC_24hr_4kb	rs45437792	6.4e-06	chr4	123498293	20.3647	26432.3	0.00681204	rs45475795	0.907857	RA	chr4:123498293-123498293	4	FALSE
OCR_123147	chr4	123498059	123498310	NUDT6	ENSG00000170917.9	HiC_0hr_4kb	rs45437792	6.4e-06	chr4	123498293	20.3647	26432.3	0.00681204	rs45475795	0.907857	RA	chr4:123498293-123498293	not_differential	FALSE
OCR_123147	chr4	123498059	123498310	SPATA5	ENSG00000145375.7	HiC_0hr_4kb	rs45437792	6.4e-06	chr4	123498293	20.3647	26432.3	0.00681204	rs45475795	0.907857	RA	chr4:123498293-123498293	3	FALSE
OCR_123147	chr4	123498059	123498310	TRPC3	ENSG00000138741.6	HiC_0hr_4kb:HiC_24hr_4kb	rs45437792	6.4e-06	chr4	123498293	20.3647	26432.3	0.00681204	rs45475795	0.907857	RA	chr4:123498293-123498293	not_differential	FALSE
OCR_123148	chr4	123498392	123498607	BBS7	ENSG00000138686.5	HiC_0hr_4kb	rs7662182	3.25e-06	chr4	123498431	21.663	50589.5	0.0219434	rs17389644	0.774372	ECZ	chr4:123498431-123498431	5	FALSE
OCR_123148	chr4	123498392	123498607	EXOSC9	ENSG00000123737.8	HiC_0hr_4kb	rs7662182	3.25e-06	chr4	123498431	21.663	50589.5	0.0219434	rs17389644	0.774372	ECZ	chr4:123498431-123498431	3	FALSE
OCR_123148	chr4	123498392	123498607	IL2	ENSG00000109471.4	HiC_8hr_4kb:HiC_24hr_4kb	rs7662182	3.25e-06	chr4	123498431	21.663	50589.5	0.0219434	rs17389644	0.774372	ECZ	chr4:123498431-123498431	1	FALSE
OCR_123148	chr4	123498392	123498607	KIAA1109	ENSG00000138688.11	HiC_0hr_4kb:HiC_8hr_4kb:HiC_24hr_2kb:HiC_24hr_4kb	rs7662182	3.25e-06	chr4	123498431	21.663	50589.5	0.0219434	rs17389644	0.774372	ECZ	chr4:123498431-123498431	4	FALSE
OCR_123148	chr4	123498392	123498607	NUDT6	ENSG00000170917.9	HiC_0hr_4kb	rs7662182	3.25e-06	chr4	123498431	21.663	50589.5	0.0219434	rs17389644	0.774372	ECZ	chr4:123498431-123498431	not_differential	FALSE
OCR_123148	chr4	123498392	123498607	SPATA5	ENSG00000145375.7	HiC_0hr_4kb	rs7662182	3.25e-06	chr4	123498431	21.663	50589.5	0.0219434	rs17389644	0.774372	ECZ	chr4:123498431-123498431	3	FALSE
OCR_123148	chr4	123498392	123498607	TRPC3	ENSG00000138741.6	HiC_0hr_4kb:HiC_24hr_4kb	rs7662182	3.25e-06	chr4	123498431	21.663	50589.5	0.0219434	rs17389644	0.774372	ECZ	chr4:123498431-123498431	not_differential	FALSE
OCR_12333	chr1	192519797	192520857	RGS1	ENSG00000090104.7	HiC_0hr_4kb	rs1323298	1.7e-12	chr1	192519865	49.8028	6.52445e+10	0.0204387	rs1359062	0.955115	MS	chr1:192519865-192519865	1	FALSE
OCR_12333	chr1	192519797	192520857	RP5-1011O1.2	ENSG00000232498.1	HiC_0hr_4kb:HiC_8hr_4kb	rs1323298	1.7e-12	chr1	192519865	49.8028	6.52445e+10	0.0204387	rs1359062	0.955115	MS	chr1:192519865-192519865	not_differential	FALSE
OCR_12340	chr1	192537274	192537521	AL136987.1	ENSG00000221145.1	HiC_0hr_4kb	rs1323296	6.39e-13	chr1	192537508	51.7233	1.7044e+11	0.0533927	rs1359062	0.716825	MS	chr1:192537508-192537508	not_differential	FALSE
OCR_12341	chr1	192540864	192541167	AL136987.1	ENSG00000221145.1	HiC_24hr_4kb	rs1323292	3.68e-13	chr1	192541021	52.8069	2.93008e+11	0.0917889	rs1359062	0.380059	MS	chr1:192541021-192541021	not_differential	FALSE
OCR_12343	chr1	192544437	192545015	AL136987.1	ENSG00000221145.1	HiC_0hr_4kb:HiC_8hr_4kb:HiC_24hr_4kb	rs2984920	5.12e-13	chr1	192544795	52.1584	2.11859e+11	0.0663679	rs1359062	0.599397	MS	chr1:192544795-192544795	not_differential	FALSE
OCR_12343	chr1	192544437	192545015	RP5-1011O1.3	ENSG00000236069.1	HiC_0hr_4kb	rs2984920	5.12e-13	chr1	192544795	52.1584	2.11859e+11	0.0663679	rs1359062	0.599397	MS	chr1:192544795-192544795	not_differential	FALSE
OCR_127615	chr5	10756718	10757092	CCT5	ENSG00000150753.7	HiC_0hr_4kb:HiC_8hr_4kb	rs267932	0.00285	chr5	10756856	8.90109	85.6738	0.001354	rs2930047	0.90624	UC	chr5:10756856-10756856	3	FALSE
OCR_127615	chr5	10756718	10757092	CCT5	ENSG00000150753.7	HiC_0hr_4kb:HiC_8hr_4kb	rs3839214	0.005756	chr5	10757028	7.62515	45.2668	0.000715402	rs2930047	0.927042	UC	chr5:10757028-10757028	3	FALSE
OCR_127615	chr5	10756718	10757092	CTD-2256P15.1	ENSG00000248968.1	HiC_0hr_4kb:HiC_8hr_4kb	rs267932	0.00285	chr5	10756856	8.90109	85.6738	0.001354	rs2930047	0.90624	UC	chr5:10756856-10756856	not_differential	FALSE
OCR_127615	chr5	10756718	10757092	CTD-2256P15.1	ENSG00000248968.1	HiC_0hr_4kb:HiC_8hr_4kb	rs3839214	0.005756	chr5	10757028	7.62515	45.2668	0.000715402	rs2930047	0.927042	UC	chr5:10757028-10757028	not_differential	FALSE
OCR_127615	chr5	10756718	10757092	CTD-2256P15.2	ENSG00000259802.1	HiC_0hr_4kb	rs267932	0.00285	chr5	10756856	8.90109	85.6738	0.001354	rs2930047	0.90624	UC	chr5:10756856-10756856	not_differential	FALSE
OCR_127615	chr5	10756718	10757092	CTD-2256P15.2	ENSG00000259802.1	HiC_0hr_4kb	rs3839214	0.005756	chr5	10757028	7.62515	45.2668	0.000715402	rs2930047	0.927042	UC	chr5:10757028-10757028	not_differential	FALSE
OCR_127615	chr5	10756718	10757092	FAM173B	ENSG00000150756.9	HiC_0hr_4kb:HiC_8hr_4kb	rs267932	0.00285	chr5	10756856	8.90109	85.6738	0.001354	rs2930047	0.90624	UC	chr5:10756856-10756856	5	FALSE
OCR_127615	chr5	10756718	10757092	FAM173B	ENSG00000150756.9	HiC_0hr_4kb:HiC_8hr_4kb	rs3839214	0.005756	chr5	10757028	7.62515	45.2668	0.000715402	rs2930047	0.927042	UC	chr5:10757028-10757028	5	FALSE
OCR_127615	chr5	10756718	10757092	2022-03-06	ENSG00000145495.10	HiC_0hr_4kb	rs267932	0.00285	chr5	10756856	8.90109	85.6738	0.001354	rs2930047	0.90624	UC	chr5:10756856-10756856	not_differential	FALSE
OCR_127615	chr5	10756718	10757092	2022-03-06	ENSG00000145495.10	HiC_0hr_4kb	rs3839214	0.005756	chr5	10757028	7.62515	45.2668	0.000715402	rs2930047	0.927042	UC	chr5:10757028-10757028	not_differential	FALSE
OCR_127617	chr5	10760616	10761985	CCT5	ENSG00000150753.7	HiC_0hr_2kb:HiC_0hr_4kb:HiC_8hr_4kb	rs11740255	0.001935	chr5	10760890	9.6102	122.131	0.00193018	rs2930047	0.893285	UC	chr5:10760890-10760890	3	FALSE
OCR_127617	chr5	10760616	10761985	CTD-2256P15.1	ENSG00000248968.1	HiC_0hr_4kb:HiC_8hr_4kb	rs11740255	0.001935	chr5	10760890	9.6102	122.131	0.00193018	rs2930047	0.893285	UC	chr5:10760890-10760890	not_differential	FALSE
OCR_127617	chr5	10760616	10761985	CTD-2256P15.2	ENSG00000259802.1	HiC_0hr_2kb:HiC_0hr_4kb:HiC_8hr_4kb	rs11740255	0.001935	chr5	10760890	9.6102	122.131	0.00193018	rs2930047	0.893285	UC	chr5:10760890-10760890	not_differential	FALSE
OCR_127617	chr5	10760616	10761985	FAM173B	ENSG00000150756.9	HiC_0hr_2kb:HiC_0hr_4kb:HiC_8hr_4kb	rs11740255	0.001935	chr5	10760890	9.6102	122.131	0.00193018	rs2930047	0.893285	UC	chr5:10760890-10760890	5	FALSE
OCR_127617	chr5	10760616	10761985	2022-03-06	ENSG00000145495.10	HiC_0hr_2kb:HiC_0hr_4kb:HiC_8hr_4kb	rs11740255	0.001935	chr5	10760890	9.6102	122.131	0.00193018	rs2930047	0.893285	UC	chr5:10760890-10760890	not_differential	FALSE
OCR_127617	chr5	10760616	10761985	ROPN1L	ENSG00000145491.7	HiC_0hr_4kb	rs11740255	0.001935	chr5	10760890	9.6102	122.131	0.00193018	rs2930047	0.893285	UC	chr5:10760890-10760890	not_differential	FALSE
OCR_127617	chr5	10760616	10761985	ROPN1L-AS1	ENSG00000250600.1	HiC_0hr_4kb	rs11740255	0.001935	chr5	10760890	9.6102	122.131	0.00193018	rs2930047	0.893285	UC	chr5:10760890-10760890	not_differential	FALSE
OCR_129570	chr5	35784526	35784911	CTD-2113L7.1	ENSG00000248969.1	HiC_0hr_4kb:HiC_8hr_4kb:HiC_24hr_4kb	rs141824653	0.027319	chr5	35784714	4.87054	11.4189	0.00102261	rs10214237	0.817821	ECZ	chr5:35784714-35784714	not_differential	FALSE
OCR_129570	chr5	35784526	35784911	IL7R	ENSG00000168685.10	HiC_0hr_2kb:HiC_0hr_4kb:HiC_8hr_2kb:HiC_8hr_4kb:HiC_24hr_4kb	rs141824653	0.027319	chr5	35784714	4.87054	11.4189	0.00102261	rs10214237	0.817821	ECZ	chr5:35784714-35784714	4	FALSE
OCR_129570	chr5	35784526	35784911	SPEF2	ENSG00000152582.8	HiC_0hr_4kb:HiC_8hr_4kb:HiC_24hr_4kb	rs141824653	0.027319	chr5	35784714	4.87054	11.4189	0.00102261	rs10214237	0.817821	ECZ	chr5:35784714-35784714	not_differential	FALSE
OCR_129572	chr5	35785660	35786375	CTD-2113L7.1	ENSG00000248969.1	HiC_0hr_4kb:HiC_8hr_4kb:HiC_24hr_4kb	rs184316044	0.139101	chr5	35785826	2.18788	2.98601	0.00026741	rs10214237	0.940893	ECZ	chr5:35785826-35785826	not_differential	FALSE
OCR_129572	chr5	35785660	35786375	IL7R	ENSG00000168685.10	HiC_0hr_2kb:HiC_0hr_4kb:HiC_8hr_2kb:HiC_8hr_4kb:HiC_24hr_4kb	rs184316044	0.139101	chr5	35785826	2.18788	2.98601	0.00026741	rs10214237	0.940893	ECZ	chr5:35785826-35785826	4	FALSE
OCR_129572	chr5	35785660	35786375	SPEF2	ENSG00000152582.8	HiC_0hr_4kb:HiC_8hr_4kb:HiC_24hr_4kb	rs184316044	0.139101	chr5	35785826	2.18788	2.98601	0.00026741	rs10214237	0.940893	ECZ	chr5:35785826-35785826	not_differential	FALSE
OCR_129576	chr5	35797063	35797810	CTD-2113L7.1	ENSG00000248969.1	HiC_0hr_4kb:HiC_8hr_4kb:HiC_24hr_4kb	rs143965891	0.026633	chr5	35797165	4.91445	11.6724	0.00104531	rs10214237	0.815753	ECZ	chr5:35797165-35797165	not_differential	FALSE
OCR_129576	chr5	35797063	35797810	IL7R	ENSG00000168685.10	HiC_0hr_2kb:HiC_0hr_4kb:HiC_8hr_2kb:HiC_8hr_4kb:HiC_24hr_4kb	rs143965891	0.026633	chr5	35797165	4.91445	11.6724	0.00104531	rs10214237	0.815753	ECZ	chr5:35797165-35797165	4	FALSE
OCR_129576	chr5	35797063	35797810	SPEF2	ENSG00000152582.8	HiC_0hr_4kb:HiC_8hr_4kb	rs143965891	0.026633	chr5	35797165	4.91445	11.6724	0.00104531	rs10214237	0.815753	ECZ	chr5:35797165-35797165	not_differential	FALSE
OCR_129577	chr5	35802957	35803765	CTD-2113L7.1	ENSG00000248969.1	HiC_0hr_4kb:HiC_24hr_4kb	rs931555	3.10743e-06	chr5	35803577	21.7491	52813.8	0.0192526	rs11742270	0.829166	AS	chr5:35803577-35803577	not_differential	FALSE
OCR_129577	chr5	35802957	35803765	CTD-2113L7.1	ENSG00000248969.1	HiC_0hr_4kb:HiC_24hr_4kb	rs931555	0.024705	chr5	35803577	5.04445	12.4563	0.00111551	rs10214237	0.80828	ECZ	chr5:35803577-35803577	not_differential	FALSE
OCR_129577	chr5	35802957	35803765	CTD-2113L7.1	ENSG00000248969.1	HiC_0hr_4kb:HiC_24hr_4kb	rs6893967	0.077569	chr5	35803636	3.11512	4.74721	0.000425133	rs10214237	0.919932	ECZ	chr5:35803636-35803636	not_differential	FALSE
OCR_129577	chr5	35802957	35803765	DNAJC21	ENSG00000168724.10	HiC_8hr_4kb	rs931555	3.10743e-06	chr5	35803577	21.7491	52813.8	0.0192526	rs11742270	0.829166	AS	chr5:35803577-35803577	3	FALSE
OCR_129577	chr5	35802957	35803765	DNAJC21	ENSG00000168724.10	HiC_8hr_4kb	rs931555	0.024705	chr5	35803577	5.04445	12.4563	0.00111551	rs10214237	0.80828	ECZ	chr5:35803577-35803577	3	FALSE
OCR_129577	chr5	35802957	35803765	DNAJC21	ENSG00000168724.10	HiC_8hr_4kb	rs6893967	0.077569	chr5	35803636	3.11512	4.74721	0.000425133	rs10214237	0.919932	ECZ	chr5:35803636-35803636	3	FALSE
OCR_129577	chr5	35802957	35803765	IL7R	ENSG00000168685.10	HiC_0hr_2kb:HiC_0hr_4kb:HiC_8hr_4kb	rs931555	3.10743e-06	chr5	35803577	21.7491	52813.8	0.0192526	rs11742270	0.829166	AS	chr5:35803577-35803577	4	FALSE
OCR_129577	chr5	35802957	35803765	IL7R	ENSG00000168685.10	HiC_0hr_2kb:HiC_0hr_4kb:HiC_8hr_4kb	rs931555	0.024705	chr5	35803577	5.04445	12.4563	0.00111551	rs10214237	0.80828	ECZ	chr5:35803577-35803577	4	FALSE
OCR_129577	chr5	35802957	35803765	IL7R	ENSG00000168685.10	HiC_0hr_2kb:HiC_0hr_4kb:HiC_8hr_4kb	rs6893967	0.077569	chr5	35803636	3.11512	4.74721	0.000425133	rs10214237	0.919932	ECZ	chr5:35803636-35803636	4	FALSE
OCR_129577	chr5	35802957	35803765	SPEF2	ENSG00000152582.8	HiC_0hr_4kb	rs931555	3.10743e-06	chr5	35803577	21.7491	52813.8	0.0192526	rs11742270	0.829166	AS	chr5:35803577-35803577	not_differential	FALSE
OCR_129577	chr5	35802957	35803765	SPEF2	ENSG00000152582.8	HiC_0hr_4kb	rs931555	0.024705	chr5	35803577	5.04445	12.4563	0.00111551	rs10214237	0.80828	ECZ	chr5:35803577-35803577	not_differential	FALSE
OCR_129577	chr5	35802957	35803765	SPEF2	ENSG00000152582.8	HiC_0hr_4kb	rs6893967	0.077569	chr5	35803636	3.11512	4.74721	0.000425133	rs10214237	0.919932	ECZ	chr5:35803636-35803636	not_differential	FALSE
OCR_129578	chr5	35804231	35805061	CTD-2113L7.1	ENSG00000248969.1	HiC_0hr_4kb	rs10155582	0.090303	chr5	35804725	2.86896	4.19747	0.000375901	rs10214237	0.927128	ECZ	chr5:35804725-35804725	not_differential	FALSE
OCR_129578	chr5	35804231	35805061	CTD-2113L7.1	ENSG00000248969.1	HiC_0hr_4kb	rs991572	0.063319	chr5	35804865	3.44824	5.6076	0.000502184	rs10214237	0.901088	ECZ	chr5:35804865-35804865	not_differential	FALSE
OCR_129578	chr5	35804231	35805061	IL7R	ENSG00000168685.10	HiC_0hr_2kb:HiC_0hr_4kb:HiC_8hr_4kb:HiC_24hr_4kb	rs10155582	0.090303	chr5	35804725	2.86896	4.19747	0.000375901	rs10214237	0.927128	ECZ	chr5:35804725-35804725	4	FALSE
OCR_129578	chr5	35804231	35805061	IL7R	ENSG00000168685.10	HiC_0hr_2kb:HiC_0hr_4kb:HiC_8hr_4kb:HiC_24hr_4kb	rs991572	0.063319	chr5	35804865	3.44824	5.6076	0.000502184	rs10214237	0.901088	ECZ	chr5:35804865-35804865	4	FALSE
OCR_129578	chr5	35804231	35805061	SPEF2	ENSG00000152582.8	HiC_0hr_4kb	rs10155582	0.090303	chr5	35804725	2.86896	4.19747	0.000375901	rs10214237	0.927128	ECZ	chr5:35804725-35804725	not_differential	FALSE
OCR_129578	chr5	35804231	35805061	SPEF2	ENSG00000152582.8	HiC_0hr_4kb	rs991572	0.063319	chr5	35804865	3.44824	5.6076	0.000502184	rs10214237	0.901088	ECZ	chr5:35804865-35804865	not_differential	FALSE
OCR_129579	chr5	35807922	35808179	CTD-2113L7.1	ENSG00000248969.1	HiC_0hr_4kb	rs1908369	0.065462	chr5	35808115	3.3933	5.45563	0.000488574	rs10214237	0.904047	ECZ	chr5:35808115-35808115	not_differential	FALSE
OCR_129579	chr5	35807922	35808179	IL7R	ENSG00000168685.10	HiC_0hr_2kb:HiC_0hr_4kb:HiC_8hr_4kb:HiC_24hr_4kb	rs1908369	0.065462	chr5	35808115	3.3933	5.45563	0.000488574	rs10214237	0.904047	ECZ	chr5:35808115-35808115	4	FALSE
OCR_129579	chr5	35807922	35808179	SPEF2	ENSG00000152582.8	HiC_0hr_4kb:HiC_8hr_4kb	rs1908369	0.065462	chr5	35808115	3.3933	5.45563	0.000488574	rs10214237	0.904047	ECZ	chr5:35808115-35808115	not_differential	FALSE
OCR_129580	chr5	35810749	35811880	CTD-2113L7.1	ENSG00000248969.1	HiC_0hr_4kb	rs1494572	0.176204	chr5	35811768	1.82935	2.49597	0.000223524	rs10214237	0.949766	ECZ	chr5:35811768-35811768	not_differential	FALSE
OCR_129580	chr5	35810749	35811880	CTD-2113L7.1	ENSG00000248969.1	HiC_0hr_4kb	rs4869674	0.039701	chr5	35811829	4.23062	8.29214	0.000742597	rs10214237	0.850167	ECZ	chr5:35811829-35811829	not_differential	FALSE
OCR_129580	chr5	35810749	35811880	IL7R	ENSG00000168685.10	HiC_0hr_2kb:HiC_0hr_4kb:HiC_8hr_4kb	rs1494572	0.176204	chr5	35811768	1.82935	2.49597	0.000223524	rs10214237	0.949766	ECZ	chr5:35811768-35811768	4	FALSE
OCR_129580	chr5	35810749	35811880	IL7R	ENSG00000168685.10	HiC_0hr_2kb:HiC_0hr_4kb:HiC_8hr_4kb	rs4869674	0.039701	chr5	35811829	4.23062	8.29214	0.000742597	rs10214237	0.850167	ECZ	chr5:35811829-35811829	4	FALSE
OCR_129580	chr5	35810749	35811880	SPEF2	ENSG00000152582.8	HiC_0hr_4kb:HiC_8hr_4kb	rs1494572	0.176204	chr5	35811768	1.82935	2.49597	0.000223524	rs10214237	0.949766	ECZ	chr5:35811768-35811768	not_differential	FALSE
OCR_129580	chr5	35810749	35811880	SPEF2	ENSG00000152582.8	HiC_0hr_4kb:HiC_8hr_4kb	rs4869674	0.039701	chr5	35811829	4.23062	8.29214	0.000742597	rs10214237	0.850167	ECZ	chr5:35811829-35811829	not_differential	FALSE
OCR_129582	chr5	35815736	35816080	CTD-2113L7.1	ENSG00000248969.1	HiC_0hr_4kb:HiC_8hr_4kb	rs35081631	1.23461e-06	chr5	35815846	23.5225	128188	0.00765634	rs11954020	0.880245	T1D	chr5:35815846-35815846	not_differential	FALSE
OCR_129582	chr5	35815736	35816080	IL7R	ENSG00000168685.10	HiC_0hr_2kb:HiC_0hr_4kb:HiC_8hr_4kb	rs35081631	1.23461e-06	chr5	35815846	23.5225	128188	0.00765634	rs11954020	0.880245	T1D	chr5:35815846-35815846	4	FALSE
OCR_129582	chr5	35815736	35816080	RAD1	ENSG00000113456.14	HiC_8hr_4kb	rs35081631	1.23461e-06	chr5	35815846	23.5225	128188	0.00765634	rs11954020	0.880245	T1D	chr5:35815846-35815846	3	FALSE
OCR_129582	chr5	35815736	35816080	SPEF2	ENSG00000152582.8	HiC_0hr_2kb:HiC_0hr_4kb:HiC_8hr_4kb	rs35081631	1.23461e-06	chr5	35815846	23.5225	128188	0.00765634	rs11954020	0.880245	T1D	chr5:35815846-35815846	not_differential	FALSE
OCR_129587	chr5	35823552	35823758	CTD-2113L7.1	ENSG00000248969.1	HiC_0hr_2kb	rs56113663	2.4256e-06	chr5	35823554	22.2245	66986.4	0.00400094	rs11954020	0.953146	T1D	chr5:35823554-35823554	not_differential	FALSE
OCR_129587	chr5	35823552	35823758	IL7R	ENSG00000168685.10	HiC_0hr_1kb:HiC_0hr_2kb:HiC_0hr_4kb:HiC_8hr_2kb:HiC_8hr_4kb:HiC_24hr_4kb	rs56113663	2.4256e-06	chr5	35823554	22.2245	66986.4	0.00400094	rs11954020	0.953146	T1D	chr5:35823554-35823554	4	FALSE
OCR_129587	chr5	35823552	35823758	SPEF2	ENSG00000152582.8	HiC_0hr_2kb:HiC_0hr_4kb:HiC_8hr_2kb:HiC_8hr_4kb	rs56113663	2.4256e-06	chr5	35823554	22.2245	66986.4	0.00400094	rs11954020	0.953146	T1D	chr5:35823554-35823554	not_differential	FALSE
OCR_129591	chr5	35828259	35828559	IL7R	ENSG00000168685.10	HiC_0hr_2kb:HiC_0hr_4kb:HiC_8hr_4kb	rs77173787	0.145422	chr5	35828362	2.11963	2.88583	0.000258438	rs10214237	0.94299	ECZ	chr5:35828362-35828362	4	FALSE
OCR_129591	chr5	35828259	35828559	SPEF2	ENSG00000152582.8	HiC_0hr_2kb:HiC_0hr_4kb:HiC_8hr_4kb:HiC_24hr_4kb	rs77173787	0.145422	chr5	35828362	2.11963	2.88583	0.000258438	rs10214237	0.94299	ECZ	chr5:35828362-35828362	not_differential	FALSE
OCR_129592	chr5	35830407	35831311	IL7R	ENSG00000168685.10	HiC_0hr_2kb:HiC_0hr_4kb:HiC_8hr_4kb	rs11950763	1.91774e-06	chr5	35830733	22.6757	83940.9	0.00501359	rs11954020	0.92204	T1D	chr5:35830733-35830733	4	FALSE
OCR_129592	chr5	35830407	35831311	IL7R	ENSG00000168685.10	HiC_0hr_2kb:HiC_0hr_4kb:HiC_8hr_4kb	rs56123112	2.09757e-07	chr5	35831103	26.941	708228	0.0423008	rs11954020	0.459271	T1D	chr5:35831103-35831103	4	FALSE
OCR_129592	chr5	35830407	35831311	SPEF2	ENSG00000152582.8	HiC_0hr_2kb:HiC_0hr_4kb:HiC_8hr_4kb:HiC_24hr_4kb	rs11950763	1.91774e-06	chr5	35830733	22.6757	83940.9	0.00501359	rs11954020	0.92204	T1D	chr5:35830733-35830733	not_differential	FALSE
OCR_129592	chr5	35830407	35831311	SPEF2	ENSG00000152582.8	HiC_0hr_2kb:HiC_0hr_4kb:HiC_8hr_4kb:HiC_24hr_4kb	rs56123112	2.09757e-07	chr5	35831103	26.941	708228	0.0423008	rs11954020	0.459271	T1D	chr5:35831103-35831103	not_differential	FALSE
OCR_129594	chr5	35835905	35836755	CTD-2113L7.1	ENSG00000248969.1	HiC_0hr_4kb	rs4482926	0.054474	chr5	35836491	3.69811	6.35383	0.000569012	rs10214237	0.879958	ECZ	chr5:35836491-35836491	not_differential	FALSE
OCR_129594	chr5	35835905	35836755	FYB	ENSG00000082074.11	HiC_8hr_4kb	rs4482926	0.054474	chr5	35836491	3.69811	6.35383	0.000569012	rs10214237	0.879958	ECZ	chr5:35836491-35836491	4	FALSE
OCR_129594	chr5	35835905	35836755	IL7R	ENSG00000168685.10	HiC_0hr_1kb:HiC_0hr_2kb:HiC_0hr_4kb:HiC_8hr_2kb:HiC_8hr_4kb:HiC_24hr_4kb	rs4482926	0.054474	chr5	35836491	3.69811	6.35383	0.000569012	rs10214237	0.879958	ECZ	chr5:35836491-35836491	4	FALSE
OCR_129594	chr5	35835905	35836755	SPEF2	ENSG00000152582.8	HiC_0hr_2kb:HiC_0hr_4kb:HiC_8hr_2kb:HiC_8hr_4kb:HiC_24hr_4kb	rs4482926	0.054474	chr5	35836491	3.69811	6.35383	0.000569012	rs10214237	0.879958	ECZ	chr5:35836491-35836491	not_differential	FALSE
OCR_129597	chr5	35852337	35852904	CTD-2113L7.1	ENSG00000248969.1	HiC_0hr_2kb:HiC_0hr_4kb:HiC_8hr_4kb	5:35852887:INDEL	0.009453	chr5	35852887	6.73517	29.0084	0.00259783	rs10214237	0.774429	ECZ	chr5:35852887-35852887	not_differential	FALSE
OCR_129597	chr5	35852337	35852904	SPEF2	ENSG00000152582.8	HiC_0hr_2kb:HiC_0hr_4kb:HiC_8hr_2kb:HiC_8hr_4kb:HiC_24hr_4kb	5:35852887:INDEL	0.009453	chr5	35852887	6.73517	29.0084	0.00259783	rs10214237	0.774429	ECZ	chr5:35852887-35852887	not_differential	FALSE
OCR_129600	chr5	35854183	35854873	CTD-2113L7.1	ENSG00000248969.1	HiC_0hr_2kb:HiC_0hr_4kb:HiC_8hr_4kb	rs1494562	0.139093	chr5	35854265	2.18796	2.98614	0.000267422	rs10214237	0.940626	ECZ	chr5:35854265-35854265	not_differential	FALSE
OCR_129600	chr5	35854183	35854873	SPEF2	ENSG00000152582.8	HiC_0hr_2kb:HiC_0hr_4kb:HiC_8hr_4kb:HiC_24hr_4kb	rs1494562	0.139093	chr5	35854265	2.18796	2.98614	0.000267422	rs10214237	0.940626	ECZ	chr5:35854265-35854265	not_differential	FALSE
OCR_129601	chr5	35856792	35857417	CTD-2113L7.1	ENSG00000248969.1	HiC_0hr_2kb:HiC_0hr_4kb:HiC_8hr_4kb	rs1353252	0.07927	chr5	35857177	3.07981	4.66414	0.000417693	rs10214237	0.922025	ECZ	chr5:35857177-35857177	not_differential	FALSE
OCR_129601	chr5	35856792	35857417	CTD-2113L7.1	ENSG00000248969.1	HiC_0hr_2kb:HiC_0hr_4kb:HiC_8hr_4kb	rs1353251	0.176489	chr5	35857207	1.82694	2.49296	0.000223255	rs10214237	0.949989	ECZ	chr5:35857207-35857207	not_differential	FALSE
OCR_129601	chr5	35856792	35857417	CTD-2113L7.1	ENSG00000248969.1	HiC_0hr_2kb:HiC_0hr_4kb:HiC_8hr_4kb	rs1494561	0.079196	chr5	35857235	3.08132	4.66768	0.000418011	rs10214237	0.921607	ECZ	chr5:35857235-35857235	not_differential	FALSE
OCR_129601	chr5	35856792	35857417	CTD-2113L7.1	ENSG00000248969.1	HiC_0hr_2kb:HiC_0hr_4kb:HiC_8hr_4kb	rs1353250	0.079157	chr5	35857262	3.08213	4.66955	0.000418178	rs10214237	0.921189	ECZ	chr5:35857262-35857262	not_differential	FALSE
OCR_129601	chr5	35856792	35857417	IL7R	ENSG00000168685.10	HiC_0hr_4kb	rs1353252	0.07927	chr5	35857177	3.07981	4.66414	0.000417693	rs10214237	0.922025	ECZ	chr5:35857177-35857177	4	FALSE
OCR_129601	chr5	35856792	35857417	IL7R	ENSG00000168685.10	HiC_0hr_4kb	rs1353251	0.176489	chr5	35857207	1.82694	2.49296	0.000223255	rs10214237	0.949989	ECZ	chr5:35857207-35857207	4	FALSE
OCR_129601	chr5	35856792	35857417	IL7R	ENSG00000168685.10	HiC_0hr_4kb	rs1494561	0.079196	chr5	35857235	3.08132	4.66768	0.000418011	rs10214237	0.921607	ECZ	chr5:35857235-35857235	4	FALSE
OCR_129601	chr5	35856792	35857417	IL7R	ENSG00000168685.10	HiC_0hr_4kb	rs1353250	0.079157	chr5	35857262	3.08213	4.66955	0.000418178	rs10214237	0.921189	ECZ	chr5:35857262-35857262	4	FALSE
OCR_129601	chr5	35856792	35857417	SPEF2	ENSG00000152582.8	HiC_0hr_2kb:HiC_0hr_4kb:HiC_8hr_2kb:HiC_8hr_4kb:HiC_24hr_4kb	rs1353252	0.07927	chr5	35857177	3.07981	4.66414	0.000417693	rs10214237	0.922025	ECZ	chr5:35857177-35857177	not_differential	FALSE
OCR_129601	chr5	35856792	35857417	SPEF2	ENSG00000152582.8	HiC_0hr_2kb:HiC_0hr_4kb:HiC_8hr_2kb:HiC_8hr_4kb:HiC_24hr_4kb	rs1353251	0.176489	chr5	35857207	1.82694	2.49296	0.000223255	rs10214237	0.949989	ECZ	chr5:35857207-35857207	not_differential	FALSE
OCR_129601	chr5	35856792	35857417	SPEF2	ENSG00000152582.8	HiC_0hr_2kb:HiC_0hr_4kb:HiC_8hr_2kb:HiC_8hr_4kb:HiC_24hr_4kb	rs1494561	0.079196	chr5	35857235	3.08132	4.66768	0.000418011	rs10214237	0.921607	ECZ	chr5:35857235-35857235	not_differential	FALSE
OCR_129601	chr5	35856792	35857417	SPEF2	ENSG00000152582.8	HiC_0hr_2kb:HiC_0hr_4kb:HiC_8hr_2kb:HiC_8hr_4kb:HiC_24hr_4kb	rs1353250	0.079157	chr5	35857262	3.08213	4.66955	0.000418178	rs10214237	0.921189	ECZ	chr5:35857262-35857262	not_differential	FALSE
OCR_129604	chr5	35863331	35863653	CTD-2113L7.1	ENSG00000248969.1	HiC_0hr_4kb:HiC_8hr_4kb	rs6893142	0.048306	chr5	35863443	3.89931	7.02626	0.000629231	rs10214237	0.863206	ECZ	chr5:35863443-35863443	not_differential	FALSE
OCR_129604	chr5	35863331	35863653	IL7R	ENSG00000168685.10	HiC_0hr_4kb:HiC_8hr_4kb	rs6893142	0.048306	chr5	35863443	3.89931	7.02626	0.000629231	rs10214237	0.863206	ECZ	chr5:35863443-35863443	4	FALSE
OCR_129604	chr5	35863331	35863653	SPEF2	ENSG00000152582.8	HiC_0hr_2kb:HiC_0hr_4kb:HiC_8hr_2kb:HiC_8hr_4kb:HiC_24hr_4kb	rs6893142	0.048306	chr5	35863443	3.89931	7.02626	0.000629231	rs10214237	0.863206	ECZ	chr5:35863443-35863443	not_differential	FALSE
OCR_129605	chr5	35864453	35864648	CTD-2113L7.1	ENSG00000248969.1	HiC_0hr_4kb	rs10044838	0.05631	chr5	35864590	3.64286	6.1807	0.000553508	rs10214237	0.888926	ECZ	chr5:35864590-35864590	not_differential	FALSE
OCR_129605	chr5	35864453	35864648	IL7R	ENSG00000168685.10	HiC_0hr_4kb	rs10044838	0.05631	chr5	35864590	3.64286	6.1807	0.000553508	rs10214237	0.888926	ECZ	chr5:35864590-35864590	4	FALSE
OCR_129605	chr5	35864453	35864648	SPEF2	ENSG00000152582.8	HiC_0hr_4kb:HiC_8hr_4kb:HiC_24hr_4kb	rs10044838	0.05631	chr5	35864590	3.64286	6.1807	0.000553508	rs10214237	0.888926	ECZ	chr5:35864590-35864590	not_differential	FALSE
OCR_129606	chr5	35868985	35869375	BRIX1	ENSG00000113460.8	HiC_8hr_4kb	rs1494556	0.052805	chr5	35869037	3.75008	6.52108	0.00058399	rs10214237	0.875333	ECZ	chr5:35869037-35869037	3	FALSE
OCR_129606	chr5	35868985	35869375	BRIX1	ENSG00000113460.8	HiC_8hr_4kb	rs3777090	0.052547	chr5	35869359	3.75827	6.54783	0.000586386	rs10214237	0.874749	ECZ	chr5:35869359-35869359	3	FALSE
OCR_129606	chr5	35868985	35869375	CTD-2113L7.1	ENSG00000248969.1	HiC_0hr_4kb	rs1494556	0.052805	chr5	35869037	3.75008	6.52108	0.00058399	rs10214237	0.875333	ECZ	chr5:35869037-35869037	not_differential	FALSE
OCR_129606	chr5	35868985	35869375	CTD-2113L7.1	ENSG00000248969.1	HiC_0hr_4kb	rs3777090	0.052547	chr5	35869359	3.75827	6.54783	0.000586386	rs10214237	0.874749	ECZ	chr5:35869359-35869359	not_differential	FALSE
OCR_129606	chr5	35868985	35869375	IL7R	ENSG00000168685.10	HiC_0hr_4kb	rs1494556	0.052805	chr5	35869037	3.75008	6.52108	0.00058399	rs10214237	0.875333	ECZ	chr5:35869037-35869037	4	FALSE
OCR_129606	chr5	35868985	35869375	IL7R	ENSG00000168685.10	HiC_0hr_4kb	rs3777090	0.052547	chr5	35869359	3.75827	6.54783	0.000586386	rs10214237	0.874749	ECZ	chr5:35869359-35869359	4	FALSE
OCR_129606	chr5	35868985	35869375	RAD1	ENSG00000113456.14	HiC_8hr_4kb	rs1494556	0.052805	chr5	35869037	3.75008	6.52108	0.00058399	rs10214237	0.875333	ECZ	chr5:35869037-35869037	3	FALSE
OCR_129606	chr5	35868985	35869375	RAD1	ENSG00000113456.14	HiC_8hr_4kb	rs3777090	0.052547	chr5	35869359	3.75827	6.54783	0.000586386	rs10214237	0.874749	ECZ	chr5:35869359-35869359	3	FALSE
OCR_129606	chr5	35868985	35869375	SPEF2	ENSG00000152582.8	HiC_0hr_2kb:HiC_0hr_4kb:HiC_8hr_4kb:HiC_24hr_4kb	rs1494556	0.052805	chr5	35869037	3.75008	6.52108	0.00058399	rs10214237	0.875333	ECZ	chr5:35869037-35869037	not_differential	FALSE
OCR_129606	chr5	35868985	35869375	SPEF2	ENSG00000152582.8	HiC_0hr_2kb:HiC_0hr_4kb:HiC_8hr_4kb:HiC_24hr_4kb	rs3777090	0.052547	chr5	35869359	3.75827	6.54783	0.000586386	rs10214237	0.874749	ECZ	chr5:35869359-35869359	not_differential	FALSE
OCR_129608	chr5	35870764	35871025	BRIX1	ENSG00000113460.8	HiC_8hr_4kb	rs10063445	0.053041	chr5	35870814	3.74263	6.49682	0.000581818	rs10214237	0.877665	ECZ	chr5:35870814-35870814	3	FALSE
OCR_129608	chr5	35870764	35871025	CTD-2113L7.1	ENSG00000248969.1	HiC_0hr_4kb	rs10063445	0.053041	chr5	35870814	3.74263	6.49682	0.000581818	rs10214237	0.877665	ECZ	chr5:35870814-35870814	not_differential	FALSE
OCR_129608	chr5	35870764	35871025	IL7R	ENSG00000168685.10	HiC_0hr_4kb:HiC_0hr_2kb	rs10063445	0.053041	chr5	35870814	3.74263	6.49682	0.000581818	rs10214237	0.877665	ECZ	chr5:35870814-35870814	4	FALSE
OCR_129608	chr5	35870764	35871025	RAD1	ENSG00000113456.14	HiC_8hr_4kb	rs10063445	0.053041	chr5	35870814	3.74263	6.49682	0.000581818	rs10214237	0.877665	ECZ	chr5:35870814-35870814	3	FALSE
OCR_129608	chr5	35870764	35871025	SPEF2	ENSG00000152582.8	HiC_0hr_2kb:HiC_0hr_4kb:HiC_8hr_4kb:HiC_24hr_4kb	rs10063445	0.053041	chr5	35870814	3.74263	6.49682	0.000581818	rs10214237	0.877665	ECZ	chr5:35870814-35870814	not_differential	FALSE
OCR_129609	chr5	35876591	35876864	DNAJC21	ENSG00000168724.10	HiC_8hr_4kb	rs145513117	0.031546	chr5	35876630	4.623	10.0896	0.000903562	rs10214237	0.825565	ECZ	chr5:35876630-35876630	3	FALSE
OCR_129609	chr5	35876591	35876864	IL7R	ENSG00000168685.10	HiC_0hr_2kb	rs145513117	0.031546	chr5	35876630	4.623	10.0896	0.000903562	rs10214237	0.825565	ECZ	chr5:35876630-35876630	4	FALSE
OCR_129609	chr5	35876591	35876864	SPEF2	ENSG00000152582.8	HiC_0hr_2kb:HiC_0hr_4kb:HiC_8hr_4kb:HiC_24hr_4kb	rs145513117	0.031546	chr5	35876630	4.623	10.0896	0.000903562	rs10214237	0.825565	ECZ	chr5:35876630-35876630	not_differential	FALSE
OCR_129611	chr5	35877799	35878078	DNAJC21	ENSG00000168724.10	HiC_8hr_4kb	rs9292617	0.069217	chr5	35877826	3.30149	5.21086	0.000466655	rs10214237	0.909278	ECZ	chr5:35877826-35877826	3	FALSE
OCR_129611	chr5	35877799	35878078	DNAJC21	ENSG00000168724.10	HiC_8hr_4kb	rs10491435	1.56933e-05	chr5	35877841	18.6514	11222.7	0.0040911	rs11742270	0.927808	AS	chr5:35877841-35877841	3	FALSE
OCR_129611	chr5	35877799	35878078	DNAJC21	ENSG00000168724.10	HiC_8hr_4kb	rs10491435	5.73303e-07	chr5	35877841	25	268337	0.0160271	rs11954020	0.638546	T1D	chr5:35877841-35877841	3	FALSE
OCR_129611	chr5	35877799	35878078	DNAJC21	ENSG00000168724.10	HiC_8hr_4kb	rs10491434	1.45281e-05	chr5	35877914	18.7985	12079.3	0.00440336	rs11742270	0.919444	AS	chr5:35877914-35877914	3	FALSE
OCR_129611	chr5	35877799	35878078	DNAJC21	ENSG00000168724.10	HiC_8hr_4kb	rs10491434	5.73303e-07	chr5	35877914	25	268337	0.0160271	rs11954020	0.654573	T1D	chr5:35877914-35877914	3	FALSE
OCR_129611	chr5	35877799	35878078	IL7R	ENSG00000168685.10	HiC_0hr_2kb	rs9292617	0.069217	chr5	35877826	3.30149	5.21086	0.000466655	rs10214237	0.909278	ECZ	chr5:35877826-35877826	4	FALSE
OCR_129611	chr5	35877799	35878078	IL7R	ENSG00000168685.10	HiC_0hr_2kb	rs10491435	1.56933e-05	chr5	35877841	18.6514	11222.7	0.0040911	rs11742270	0.927808	AS	chr5:35877841-35877841	4	FALSE
OCR_129611	chr5	35877799	35878078	IL7R	ENSG00000168685.10	HiC_0hr_2kb	rs10491435	5.73303e-07	chr5	35877841	25	268337	0.0160271	rs11954020	0.638546	T1D	chr5:35877841-35877841	4	FALSE
OCR_129611	chr5	35877799	35878078	IL7R	ENSG00000168685.10	HiC_0hr_2kb	rs10491434	1.45281e-05	chr5	35877914	18.7985	12079.3	0.00440336	rs11742270	0.919444	AS	chr5:35877914-35877914	4	FALSE
OCR_129611	chr5	35877799	35878078	IL7R	ENSG00000168685.10	HiC_0hr_2kb	rs10491434	5.73303e-07	chr5	35877914	25	268337	0.0160271	rs11954020	0.654573	T1D	chr5:35877914-35877914	4	FALSE
OCR_129611	chr5	35877799	35878078	SPEF2	ENSG00000152582.8	HiC_0hr_2kb:HiC_0hr_4kb:HiC_8hr_4kb:HiC_24hr_4kb	rs9292617	0.069217	chr5	35877826	3.30149	5.21086	0.000466655	rs10214237	0.909278	ECZ	chr5:35877826-35877826	not_differential	FALSE
OCR_129611	chr5	35877799	35878078	SPEF2	ENSG00000152582.8	HiC_0hr_2kb:HiC_0hr_4kb:HiC_8hr_4kb:HiC_24hr_4kb	rs10491435	1.56933e-05	chr5	35877841	18.6514	11222.7	0.0040911	rs11742270	0.927808	AS	chr5:35877841-35877841	not_differential	FALSE
OCR_129611	chr5	35877799	35878078	SPEF2	ENSG00000152582.8	HiC_0hr_2kb:HiC_0hr_4kb:HiC_8hr_4kb:HiC_24hr_4kb	rs10491435	5.73303e-07	chr5	35877841	25	268337	0.0160271	rs11954020	0.638546	T1D	chr5:35877841-35877841	not_differential	FALSE
OCR_129611	chr5	35877799	35878078	SPEF2	ENSG00000152582.8	HiC_0hr_2kb:HiC_0hr_4kb:HiC_8hr_4kb:HiC_24hr_4kb	rs10491434	1.45281e-05	chr5	35877914	18.7985	12079.3	0.00440336	rs11742270	0.919444	AS	chr5:35877914-35877914	not_differential	FALSE
OCR_129611	chr5	35877799	35878078	SPEF2	ENSG00000152582.8	HiC_0hr_2kb:HiC_0hr_4kb:HiC_8hr_4kb:HiC_24hr_4kb	rs10491434	5.73303e-07	chr5	35877914	25	268337	0.0160271	rs11954020	0.654573	T1D	chr5:35877914-35877914	not_differential	FALSE
OCR_129612	chr5	35879825	35880090	BRIX1	ENSG00000113460.8	HiC_8hr_4kb	rs1494571	1.99092e-05	chr5	35880087	18.198	8946.17	0.00326121	rs11742270	0.938155	AS	chr5:35880087-35880087	3	FALSE
OCR_129612	chr5	35879825	35880090	BRIX1	ENSG00000113460.8	HiC_8hr_4kb	rs1494571	9.35407e-07	chr5	35880087	24.0567	167434	0.0100004	rs11954020	0.814983	T1D	chr5:35880087-35880087	3	FALSE
OCR_129612	chr5	35879825	35880090	DNAJC21	ENSG00000168724.10	HiC_8hr_4kb	rs1494571	1.99092e-05	chr5	35880087	18.198	8946.17	0.00326121	rs11742270	0.938155	AS	chr5:35880087-35880087	3	FALSE
OCR_129612	chr5	35879825	35880090	DNAJC21	ENSG00000168724.10	HiC_8hr_4kb	rs1494571	9.35407e-07	chr5	35880087	24.0567	167434	0.0100004	rs11954020	0.814983	T1D	chr5:35880087-35880087	3	FALSE
OCR_129612	chr5	35879825	35880090	IL7R	ENSG00000168685.10	HiC_0hr_4kb:HiC_8hr_4kb	rs1494571	1.99092e-05	chr5	35880087	18.198	8946.17	0.00326121	rs11742270	0.938155	AS	chr5:35880087-35880087	4	FALSE
OCR_129612	chr5	35879825	35880090	IL7R	ENSG00000168685.10	HiC_0hr_4kb:HiC_8hr_4kb	rs1494571	9.35407e-07	chr5	35880087	24.0567	167434	0.0100004	rs11954020	0.814983	T1D	chr5:35880087-35880087	4	FALSE
OCR_129612	chr5	35879825	35880090	RAD1	ENSG00000113456.14	HiC_8hr_4kb	rs1494571	1.99092e-05	chr5	35880087	18.198	8946.17	0.00326121	rs11742270	0.938155	AS	chr5:35880087-35880087	3	FALSE
OCR_129612	chr5	35879825	35880090	RAD1	ENSG00000113456.14	HiC_8hr_4kb	rs1494571	9.35407e-07	chr5	35880087	24.0567	167434	0.0100004	rs11954020	0.814983	T1D	chr5:35880087-35880087	3	FALSE
OCR_129612	chr5	35879825	35880090	SPEF2	ENSG00000152582.8	HiC_0hr_2kb:HiC_0hr_4kb:HiC_8hr_4kb:HiC_24hr_4kb	rs1494571	1.99092e-05	chr5	35880087	18.198	8946.17	0.00326121	rs11742270	0.938155	AS	chr5:35880087-35880087	not_differential	FALSE
OCR_129612	chr5	35879825	35880090	SPEF2	ENSG00000152582.8	HiC_0hr_2kb:HiC_0hr_4kb:HiC_8hr_4kb:HiC_24hr_4kb	rs1494571	9.35407e-07	chr5	35880087	24.0567	167434	0.0100004	rs11954020	0.814983	T1D	chr5:35880087-35880087	not_differential	FALSE
OCR_129614	chr5	35883373	35883780	BRIX1	ENSG00000113460.8	HiC_8hr_4kb	rs10214237	1.6585e-06	chr5	35883734	22.9549	96512.9	0.0351825	rs11742270	0.787249	AS	chr5:35883734-35883734	3	FALSE
OCR_129614	chr5	35883373	35883780	BRIX1	ENSG00000113460.8	HiC_8hr_4kb	rs10214237	0.000371	chr5	35883734	12.6729	564.779	0.0505783	rs10214237	0.103424	ECZ	chr5:35883734-35883734	3	FALSE
OCR_129614	chr5	35883373	35883780	BRIX1	ENSG00000113460.8	HiC_8hr_4kb	rs10214237	1.55e-08	chr5	35883734	31.9896	8.84003e+06	0.0387002	rs6881706	0.922864	MS	chr5:35883734-35883734	3	FALSE
OCR_129614	chr5	35883373	35883780	IL7R	ENSG00000168685.10	HiC_0hr_4kb:HiC_8hr_4kb	rs10214237	1.6585e-06	chr5	35883734	22.9549	96512.9	0.0351825	rs11742270	0.787249	AS	chr5:35883734-35883734	4	FALSE
OCR_129614	chr5	35883373	35883780	IL7R	ENSG00000168685.10	HiC_0hr_4kb:HiC_8hr_4kb	rs10214237	0.000371	chr5	35883734	12.6729	564.779	0.0505783	rs10214237	0.103424	ECZ	chr5:35883734-35883734	4	FALSE
OCR_129614	chr5	35883373	35883780	IL7R	ENSG00000168685.10	HiC_0hr_4kb:HiC_8hr_4kb	rs10214237	1.55e-08	chr5	35883734	31.9896	8.84003e+06	0.0387002	rs6881706	0.922864	MS	chr5:35883734-35883734	4	FALSE
OCR_129614	chr5	35883373	35883780	RAD1	ENSG00000113456.14	HiC_8hr_4kb	rs10214237	1.6585e-06	chr5	35883734	22.9549	96512.9	0.0351825	rs11742270	0.787249	AS	chr5:35883734-35883734	3	FALSE
OCR_129614	chr5	35883373	35883780	RAD1	ENSG00000113456.14	HiC_8hr_4kb	rs10214237	0.000371	chr5	35883734	12.6729	564.779	0.0505783	rs10214237	0.103424	ECZ	chr5:35883734-35883734	3	FALSE
OCR_129614	chr5	35883373	35883780	RAD1	ENSG00000113456.14	HiC_8hr_4kb	rs10214237	1.55e-08	chr5	35883734	31.9896	8.84003e+06	0.0387002	rs6881706	0.922864	MS	chr5:35883734-35883734	3	FALSE
OCR_129614	chr5	35883373	35883780	SPEF2	ENSG00000152582.8	HiC_0hr_2kb:HiC_0hr_4kb:HiC_8hr_2kb:HiC_8hr_4kb	rs10214237	1.6585e-06	chr5	35883734	22.9549	96512.9	0.0351825	rs11742270	0.787249	AS	chr5:35883734-35883734	not_differential	FALSE
OCR_129614	chr5	35883373	35883780	SPEF2	ENSG00000152582.8	HiC_0hr_2kb:HiC_0hr_4kb:HiC_8hr_2kb:HiC_8hr_4kb	rs10214237	0.000371	chr5	35883734	12.6729	564.779	0.0505783	rs10214237	0.103424	ECZ	chr5:35883734-35883734	not_differential	FALSE
OCR_129614	chr5	35883373	35883780	SPEF2	ENSG00000152582.8	HiC_0hr_2kb:HiC_0hr_4kb:HiC_8hr_2kb:HiC_8hr_4kb	rs10214237	1.55e-08	chr5	35883734	31.9896	8.84003e+06	0.0387002	rs6881706	0.922864	MS	chr5:35883734-35883734	not_differential	FALSE
OCR_129615	chr5	35884125	35884881	SPEF2	ENSG00000152582.8	HiC_0hr_2kb:HiC_0hr_4kb:HiC_8hr_2kb:HiC_8hr_4kb	5:35884204:INDEL	0.12918	chr5	35884204	2.30233	3.16188	0.000283159	rs10214237	0.937351	ECZ	chr5:35884204-35884204	not_differential	FALSE
OCR_129618	chr5	35904606	35905440	BRIX1	ENSG00000113460.8	HiC_24hr_4kb	rs1833907	3.48303e-07	chr5	35904614	25.9615	433968	0.0259199	rs11954020	0.518266	T1D	chr5:35904614-35904614	3	FALSE
OCR_129618	chr5	35904606	35905440	BRIX1	ENSG00000113460.8	HiC_24hr_4kb	rs1345827	0.058808	chr5	35904889	3.57069	5.96163	0.000533889	rs10214237	0.894353	ECZ	chr5:35904889-35904889	3	FALSE
OCR_129618	chr5	35904606	35905440	BRIX1	ENSG00000113460.8	HiC_24hr_4kb	rs2361403	0.054994	chr5	35905211	3.68227	6.30368	0.000564521	rs10214237	0.882793	ECZ	chr5:35905211-35905211	3	FALSE
OCR_129618	chr5	35904606	35905440	CTD-2113L7.1	ENSG00000248969.1	HiC_8hr_4kb:HiC_24hr_4kb	rs1833907	3.48303e-07	chr5	35904614	25.9615	433968	0.0259199	rs11954020	0.518266	T1D	chr5:35904614-35904614	not_differential	FALSE
OCR_129618	chr5	35904606	35905440	CTD-2113L7.1	ENSG00000248969.1	HiC_8hr_4kb:HiC_24hr_4kb	rs1345827	0.058808	chr5	35904889	3.57069	5.96163	0.000533889	rs10214237	0.894353	ECZ	chr5:35904889-35904889	not_differential	FALSE
OCR_129618	chr5	35904606	35905440	CTD-2113L7.1	ENSG00000248969.1	HiC_8hr_4kb:HiC_24hr_4kb	rs2361403	0.054994	chr5	35905211	3.68227	6.30368	0.000564521	rs10214237	0.882793	ECZ	chr5:35905211-35905211	not_differential	FALSE
OCR_129618	chr5	35904606	35905440	IL7R	ENSG00000168685.10	HiC_8hr_4kb:HiC_24hr_4kb	rs1833907	3.48303e-07	chr5	35904614	25.9615	433968	0.0259199	rs11954020	0.518266	T1D	chr5:35904614-35904614	4	FALSE
OCR_129618	chr5	35904606	35905440	IL7R	ENSG00000168685.10	HiC_8hr_4kb:HiC_24hr_4kb	rs1345827	0.058808	chr5	35904889	3.57069	5.96163	0.000533889	rs10214237	0.894353	ECZ	chr5:35904889-35904889	4	FALSE
OCR_129618	chr5	35904606	35905440	IL7R	ENSG00000168685.10	HiC_8hr_4kb:HiC_24hr_4kb	rs2361403	0.054994	chr5	35905211	3.68227	6.30368	0.000564521	rs10214237	0.882793	ECZ	chr5:35905211-35905211	4	FALSE
OCR_129618	chr5	35904606	35905440	PRLR	ENSG00000113494.12	HiC_0hr_4kb	rs1833907	3.48303e-07	chr5	35904614	25.9615	433968	0.0259199	rs11954020	0.518266	T1D	chr5:35904614-35904614	2	FALSE
OCR_129618	chr5	35904606	35905440	PRLR	ENSG00000113494.12	HiC_0hr_4kb	rs1345827	0.058808	chr5	35904889	3.57069	5.96163	0.000533889	rs10214237	0.894353	ECZ	chr5:35904889-35904889	2	FALSE
OCR_129618	chr5	35904606	35905440	PRLR	ENSG00000113494.12	HiC_0hr_4kb	rs2361403	0.054994	chr5	35905211	3.68227	6.30368	0.000564521	rs10214237	0.882793	ECZ	chr5:35905211-35905211	2	FALSE
OCR_129618	chr5	35904606	35905440	RAD1	ENSG00000113456.14	HiC_24hr_4kb	rs1833907	3.48303e-07	chr5	35904614	25.9615	433968	0.0259199	rs11954020	0.518266	T1D	chr5:35904614-35904614	3	FALSE
OCR_129618	chr5	35904606	35905440	RAD1	ENSG00000113456.14	HiC_24hr_4kb	rs1345827	0.058808	chr5	35904889	3.57069	5.96163	0.000533889	rs10214237	0.894353	ECZ	chr5:35904889-35904889	3	FALSE
OCR_129618	chr5	35904606	35905440	RAD1	ENSG00000113456.14	HiC_24hr_4kb	rs2361403	0.054994	chr5	35905211	3.68227	6.30368	0.000564521	rs10214237	0.882793	ECZ	chr5:35905211-35905211	3	FALSE
OCR_129618	chr5	35904606	35905440	RNU7-130P	ENSG00000238441.1	HiC_0hr_4kb:HiC_8hr_4kb	rs1833907	3.48303e-07	chr5	35904614	25.9615	433968	0.0259199	rs11954020	0.518266	T1D	chr5:35904614-35904614	not_differential	FALSE
OCR_129618	chr5	35904606	35905440	RNU7-130P	ENSG00000238441.1	HiC_0hr_4kb:HiC_8hr_4kb	rs1345827	0.058808	chr5	35904889	3.57069	5.96163	0.000533889	rs10214237	0.894353	ECZ	chr5:35904889-35904889	not_differential	FALSE
OCR_129618	chr5	35904606	35905440	RNU7-130P	ENSG00000238441.1	HiC_0hr_4kb:HiC_8hr_4kb	rs2361403	0.054994	chr5	35905211	3.68227	6.30368	0.000564521	rs10214237	0.882793	ECZ	chr5:35905211-35905211	not_differential	FALSE
OCR_129618	chr5	35904606	35905440	SPEF2	ENSG00000152582.8	HiC_0hr_2kb:HiC_0hr_4kb:HiC_8hr_2kb:HiC_8hr_4kb:HiC_24hr_4kb	rs1833907	3.48303e-07	chr5	35904614	25.9615	433968	0.0259199	rs11954020	0.518266	T1D	chr5:35904614-35904614	not_differential	FALSE
OCR_129618	chr5	35904606	35905440	SPEF2	ENSG00000152582.8	HiC_0hr_2kb:HiC_0hr_4kb:HiC_8hr_2kb:HiC_8hr_4kb:HiC_24hr_4kb	rs1345827	0.058808	chr5	35904889	3.57069	5.96163	0.000533889	rs10214237	0.894353	ECZ	chr5:35904889-35904889	not_differential	FALSE
OCR_129618	chr5	35904606	35905440	SPEF2	ENSG00000152582.8	HiC_0hr_2kb:HiC_0hr_4kb:HiC_8hr_2kb:HiC_8hr_4kb:HiC_24hr_4kb	rs2361403	0.054994	chr5	35905211	3.68227	6.30368	0.000564521	rs10214237	0.882793	ECZ	chr5:35905211-35905211	not_differential	FALSE
OCR_129619	chr5	35908390	35908683	BRIX1	ENSG00000113460.8	HiC_8hr_4kb	rs1010599	0.067227	chr5	35908474	3.34946	5.33736	0.000477983	rs10214237	0.905983	ECZ	chr5:35908474-35908474	3	FALSE
OCR_129619	chr5	35908390	35908683	BRIX1	ENSG00000113460.8	HiC_8hr_4kb	rs115727000	0.004605	chr5	35908610	8.02838	55.3784	0.00495937	rs10214237	0.743712	ECZ	chr5:35908610-35908610	3	FALSE
OCR_129619	chr5	35908390	35908683	CTD-2113L7.1	ENSG00000248969.1	HiC_24hr_4kb	rs1010599	0.067227	chr5	35908474	3.34946	5.33736	0.000477983	rs10214237	0.905983	ECZ	chr5:35908474-35908474	not_differential	FALSE
OCR_129619	chr5	35908390	35908683	CTD-2113L7.1	ENSG00000248969.1	HiC_24hr_4kb	rs115727000	0.004605	chr5	35908610	8.02838	55.3784	0.00495937	rs10214237	0.743712	ECZ	chr5:35908610-35908610	not_differential	FALSE
OCR_129619	chr5	35908390	35908683	IL7R	ENSG00000168685.10	HiC_24hr_4kb	rs1010599	0.067227	chr5	35908474	3.34946	5.33736	0.000477983	rs10214237	0.905983	ECZ	chr5:35908474-35908474	4	FALSE
OCR_129619	chr5	35908390	35908683	IL7R	ENSG00000168685.10	HiC_24hr_4kb	rs115727000	0.004605	chr5	35908610	8.02838	55.3784	0.00495937	rs10214237	0.743712	ECZ	chr5:35908610-35908610	4	FALSE
OCR_129619	chr5	35908390	35908683	PRLR	ENSG00000113494.12	HiC_0hr_4kb	rs1010599	0.067227	chr5	35908474	3.34946	5.33736	0.000477983	rs10214237	0.905983	ECZ	chr5:35908474-35908474	2	FALSE
OCR_129619	chr5	35908390	35908683	PRLR	ENSG00000113494.12	HiC_0hr_4kb	rs115727000	0.004605	chr5	35908610	8.02838	55.3784	0.00495937	rs10214237	0.743712	ECZ	chr5:35908610-35908610	2	FALSE
OCR_129619	chr5	35908390	35908683	RAD1	ENSG00000113456.14	HiC_8hr_4kb	rs1010599	0.067227	chr5	35908474	3.34946	5.33736	0.000477983	rs10214237	0.905983	ECZ	chr5:35908474-35908474	3	FALSE
OCR_129619	chr5	35908390	35908683	RAD1	ENSG00000113456.14	HiC_8hr_4kb	rs115727000	0.004605	chr5	35908610	8.02838	55.3784	0.00495937	rs10214237	0.743712	ECZ	chr5:35908610-35908610	3	FALSE
OCR_129619	chr5	35908390	35908683	SPEF2	ENSG00000152582.8	HiC_0hr_2kb:HiC_0hr_4kb:HiC_8hr_2kb:HiC_8hr_4kb:HiC_24hr_4kb	rs1010599	0.067227	chr5	35908474	3.34946	5.33736	0.000477983	rs10214237	0.905983	ECZ	chr5:35908474-35908474	not_differential	FALSE
OCR_129619	chr5	35908390	35908683	SPEF2	ENSG00000152582.8	HiC_0hr_2kb:HiC_0hr_4kb:HiC_8hr_2kb:HiC_8hr_4kb:HiC_24hr_4kb	rs115727000	0.004605	chr5	35908610	8.02838	55.3784	0.00495937	rs10214237	0.743712	ECZ	chr5:35908610-35908610	not_differential	FALSE
OCR_129621	chr5	35919418	35919709	CTD-2113L7.1	ENSG00000248969.1	HiC_8hr_4kb	rs4024109	0.056465	chr5	35919618	3.63829	6.16657	0.000552243	rs10214237	0.889478	ECZ	chr5:35919618-35919618	not_differential	FALSE
OCR_129621	chr5	35919418	35919709	CTD-2113L7.1	ENSG00000248969.1	HiC_8hr_4kb	rs116776788	0.009337	chr5	35919669	6.7572	29.3297	0.0026266	rs10214237	0.771831	ECZ	chr5:35919669-35919669	not_differential	FALSE
OCR_129621	chr5	35919418	35919709	IL7R	ENSG00000168685.10	HiC_8hr_4kb	rs4024109	0.056465	chr5	35919618	3.63829	6.16657	0.000552243	rs10214237	0.889478	ECZ	chr5:35919618-35919618	4	FALSE
OCR_129621	chr5	35919418	35919709	IL7R	ENSG00000168685.10	HiC_8hr_4kb	rs116776788	0.009337	chr5	35919669	6.7572	29.3297	0.0026266	rs10214237	0.771831	ECZ	chr5:35919669-35919669	4	FALSE
OCR_129621	chr5	35919418	35919709	PRLR	ENSG00000113494.12	HiC_0hr_2kb:HiC_0hr_4kb	rs4024109	0.056465	chr5	35919618	3.63829	6.16657	0.000552243	rs10214237	0.889478	ECZ	chr5:35919618-35919618	2	FALSE
OCR_129621	chr5	35919418	35919709	PRLR	ENSG00000113494.12	HiC_0hr_2kb:HiC_0hr_4kb	rs116776788	0.009337	chr5	35919669	6.7572	29.3297	0.0026266	rs10214237	0.771831	ECZ	chr5:35919669-35919669	2	FALSE
OCR_129621	chr5	35919418	35919709	RNU7-130P	ENSG00000238441.1	HiC_8hr_4kb	rs4024109	0.056465	chr5	35919618	3.63829	6.16657	0.000552243	rs10214237	0.889478	ECZ	chr5:35919618-35919618	not_differential	FALSE
OCR_129621	chr5	35919418	35919709	RNU7-130P	ENSG00000238441.1	HiC_8hr_4kb	rs116776788	0.009337	chr5	35919669	6.7572	29.3297	0.0026266	rs10214237	0.771831	ECZ	chr5:35919669-35919669	not_differential	FALSE
OCR_129621	chr5	35919418	35919709	SPEF2	ENSG00000152582.8	HiC_0hr_2kb:HiC_0hr_4kb:HiC_8hr_2kb:HiC_8hr_4kb:HiC_24hr_2kb:HiC_24hr_4kb	rs4024109	0.056465	chr5	35919618	3.63829	6.16657	0.000552243	rs10214237	0.889478	ECZ	chr5:35919618-35919618	not_differential	FALSE
OCR_129621	chr5	35919418	35919709	SPEF2	ENSG00000152582.8	HiC_0hr_2kb:HiC_0hr_4kb:HiC_8hr_2kb:HiC_8hr_4kb:HiC_24hr_2kb:HiC_24hr_4kb	rs116776788	0.009337	chr5	35919669	6.7572	29.3297	0.0026266	rs10214237	0.771831	ECZ	chr5:35919669-35919669	not_differential	FALSE
OCR_129622	chr5	35924194	35924443	AC010368.2	ENSG00000269027.1	HiC_8hr_4kb	rs10054418	0.054174	chr5	35924309	3.70733	6.38317	0.00057164	rs10214237	0.879389	ECZ	chr5:35924309-35924309	not_differential	FALSE
OCR_129622	chr5	35924194	35924443	AGXT2	ENSG00000113492.9	HiC_8hr_4kb	rs10054418	0.054174	chr5	35924309	3.70733	6.38317	0.00057164	rs10214237	0.879389	ECZ	chr5:35924309-35924309	not_differential	FALSE
OCR_129622	chr5	35924194	35924443	CTD-2113L7.1	ENSG00000248969.1	HiC_0hr_4kb:HiC_24hr_4kb	rs10054418	0.054174	chr5	35924309	3.70733	6.38317	0.00057164	rs10214237	0.879389	ECZ	chr5:35924309-35924309	not_differential	FALSE
OCR_129622	chr5	35924194	35924443	DNAJC21	ENSG00000168724.10	HiC_0hr_4kb:HiC_8hr_4kb	rs10054418	0.054174	chr5	35924309	3.70733	6.38317	0.00057164	rs10214237	0.879389	ECZ	chr5:35924309-35924309	3	FALSE
OCR_129622	chr5	35924194	35924443	IL7R	ENSG00000168685.10	HiC_8hr_4kb:HiC_24hr_2kb:HiC_24hr_4kb	rs10054418	0.054174	chr5	35924309	3.70733	6.38317	0.00057164	rs10214237	0.879389	ECZ	chr5:35924309-35924309	4	FALSE
OCR_129622	chr5	35924194	35924443	PRLR	ENSG00000113494.12	HiC_0hr_2kb:HiC_0hr_4kb:HiC_8hr_2kb:HiC_8hr_4kb:HiC_24hr_4kb	rs10054418	0.054174	chr5	35924309	3.70733	6.38317	0.00057164	rs10214237	0.879389	ECZ	chr5:35924309-35924309	2	FALSE
OCR_129622	chr5	35924194	35924443	RAD1	ENSG00000113456.14	HiC_0hr_4kb:HiC_8hr_4kb	rs10054418	0.054174	chr5	35924309	3.70733	6.38317	0.00057164	rs10214237	0.879389	ECZ	chr5:35924309-35924309	3	FALSE
OCR_129622	chr5	35924194	35924443	RNU7-130P	ENSG00000238441.1	HiC_0hr_2kb:HiC_0hr_4kb:HiC_8hr_4kb:HiC_24hr_4kb	rs10054418	0.054174	chr5	35924309	3.70733	6.38317	0.00057164	rs10214237	0.879389	ECZ	chr5:35924309-35924309	not_differential	FALSE
OCR_129622	chr5	35924194	35924443	SPEF2	ENSG00000152582.8	HiC_0hr_1kb:HiC_0hr_2kb:HiC_0hr_4kb:HiC_8hr_2kb:HiC_8hr_4kb:HiC_24hr_2kb:HiC_24hr_4kb	rs10054418	0.054174	chr5	35924309	3.70733	6.38317	0.00057164	rs10214237	0.879389	ECZ	chr5:35924309-35924309	not_differential	FALSE
OCR_129623	chr5	35924672	35925689	AC010368.2	ENSG00000269027.1	HiC_8hr_4kb	rs6871116	4.4735e-07	chr5	35924748	25.4785	340861	0.0203588	rs11954020	0.590464	T1D	chr5:35924748-35924748	not_differential	FALSE
OCR_129623	chr5	35924672	35925689	AC010368.2	ENSG00000269027.1	HiC_8hr_4kb	rs852242	0.087826	chr5	35925214	2.91378	4.29258	0.000384419	rs10214237	0.925224	ECZ	chr5:35925214-35925214	not_differential	FALSE
OCR_129623	chr5	35924672	35925689	AGXT2	ENSG00000113492.9	HiC_8hr_4kb	rs6871116	4.4735e-07	chr5	35924748	25.4785	340861	0.0203588	rs11954020	0.590464	T1D	chr5:35924748-35924748	not_differential	FALSE
OCR_129623	chr5	35924672	35925689	AGXT2	ENSG00000113492.9	HiC_8hr_4kb	rs852242	0.087826	chr5	35925214	2.91378	4.29258	0.000384419	rs10214237	0.925224	ECZ	chr5:35925214-35925214	not_differential	FALSE
OCR_129623	chr5	35924672	35925689	CTD-2113L7.1	ENSG00000248969.1	HiC_0hr_4kb:HiC_24hr_4kb	rs6871116	4.4735e-07	chr5	35924748	25.4785	340861	0.0203588	rs11954020	0.590464	T1D	chr5:35924748-35924748	not_differential	FALSE
OCR_129623	chr5	35924672	35925689	CTD-2113L7.1	ENSG00000248969.1	HiC_0hr_4kb:HiC_24hr_4kb	rs852242	0.087826	chr5	35925214	2.91378	4.29258	0.000384419	rs10214237	0.925224	ECZ	chr5:35925214-35925214	not_differential	FALSE
OCR_129623	chr5	35924672	35925689	DNAJC21	ENSG00000168724.10	HiC_0hr_4kb:HiC_8hr_4kb	rs6871116	4.4735e-07	chr5	35924748	25.4785	340861	0.0203588	rs11954020	0.590464	T1D	chr5:35924748-35924748	3	FALSE
OCR_129623	chr5	35924672	35925689	DNAJC21	ENSG00000168724.10	HiC_0hr_4kb:HiC_8hr_4kb	rs852242	0.087826	chr5	35925214	2.91378	4.29258	0.000384419	rs10214237	0.925224	ECZ	chr5:35925214-35925214	3	FALSE
OCR_129623	chr5	35924672	35925689	IL7R	ENSG00000168685.10	HiC_8hr_4kb:HiC_24hr_2kb:HiC_24hr_4kb	rs6871116	4.4735e-07	chr5	35924748	25.4785	340861	0.0203588	rs11954020	0.590464	T1D	chr5:35924748-35924748	4	FALSE
OCR_129623	chr5	35924672	35925689	IL7R	ENSG00000168685.10	HiC_8hr_4kb:HiC_24hr_2kb:HiC_24hr_4kb	rs852242	0.087826	chr5	35925214	2.91378	4.29258	0.000384419	rs10214237	0.925224	ECZ	chr5:35925214-35925214	4	FALSE
OCR_129623	chr5	35924672	35925689	PRLR	ENSG00000113494.12	HiC_0hr_1kb:HiC_0hr_2kb:HiC_0hr_4kb:HiC_8hr_1kb:HiC_8hr_2kb:HiC_8hr_4kb:HiC_24hr_4kb	rs6871116	4.4735e-07	chr5	35924748	25.4785	340861	0.0203588	rs11954020	0.590464	T1D	chr5:35924748-35924748	2	FALSE
OCR_129623	chr5	35924672	35925689	PRLR	ENSG00000113494.12	HiC_0hr_1kb:HiC_0hr_2kb:HiC_0hr_4kb:HiC_8hr_1kb:HiC_8hr_2kb:HiC_8hr_4kb:HiC_24hr_4kb	rs852242	0.087826	chr5	35925214	2.91378	4.29258	0.000384419	rs10214237	0.925224	ECZ	chr5:35925214-35925214	2	FALSE
OCR_129623	chr5	35924672	35925689	RAD1	ENSG00000113456.14	HiC_0hr_4kb:HiC_8hr_4kb	rs6871116	4.4735e-07	chr5	35924748	25.4785	340861	0.0203588	rs11954020	0.590464	T1D	chr5:35924748-35924748	3	FALSE
OCR_129623	chr5	35924672	35925689	RAD1	ENSG00000113456.14	HiC_0hr_4kb:HiC_8hr_4kb	rs852242	0.087826	chr5	35925214	2.91378	4.29258	0.000384419	rs10214237	0.925224	ECZ	chr5:35925214-35925214	3	FALSE
OCR_129623	chr5	35924672	35925689	RNU7-130P	ENSG00000238441.1	HiC_0hr_2kb:HiC_0hr_4kb:HiC_8hr_4kb:HiC_24hr_4kb	rs6871116	4.4735e-07	chr5	35924748	25.4785	340861	0.0203588	rs11954020	0.590464	T1D	chr5:35924748-35924748	not_differential	FALSE
OCR_129623	chr5	35924672	35925689	RNU7-130P	ENSG00000238441.1	HiC_0hr_2kb:HiC_0hr_4kb:HiC_8hr_4kb:HiC_24hr_4kb	rs852242	0.087826	chr5	35925214	2.91378	4.29258	0.000384419	rs10214237	0.925224	ECZ	chr5:35925214-35925214	not_differential	FALSE
OCR_129623	chr5	35924672	35925689	SPEF2	ENSG00000152582.8	HiC_0hr_1kb:HiC_0hr_2kb:HiC_0hr_4kb:HiC_8hr_1kb:HiC_8hr_2kb:HiC_8hr_4kb:HiC_24hr_2kb:HiC_24hr_4kb	rs6871116	4.4735e-07	chr5	35924748	25.4785	340861	0.0203588	rs11954020	0.590464	T1D	chr5:35924748-35924748	not_differential	FALSE
OCR_129623	chr5	35924672	35925689	SPEF2	ENSG00000152582.8	HiC_0hr_1kb:HiC_0hr_2kb:HiC_0hr_4kb:HiC_8hr_1kb:HiC_8hr_2kb:HiC_8hr_4kb:HiC_24hr_2kb:HiC_24hr_4kb	rs852242	0.087826	chr5	35925214	2.91378	4.29258	0.000384419	rs10214237	0.925224	ECZ	chr5:35925214-35925214	not_differential	FALSE
OCR_129624	chr5	35926289	35926865	AC010368.2	ENSG00000269027.1	HiC_8hr_4kb	rs111459942	9.84374e-07	chr5	35926576	23.9584	159408	0.00952108	rs11954020	0.872589	T1D	chr5:35926576-35926576	not_differential	FALSE
OCR_129624	chr5	35926289	35926865	AC010368.2	ENSG00000269027.1	HiC_8hr_4kb	rs138912305	0.048597	chr5	35926774	3.88922	6.9909	0.000626065	rs10214237	0.863832	ECZ	chr5:35926774-35926774	not_differential	FALSE
OCR_129624	chr5	35926289	35926865	AGXT2	ENSG00000113492.9	HiC_8hr_4kb	rs111459942	9.84374e-07	chr5	35926576	23.9584	159408	0.00952108	rs11954020	0.872589	T1D	chr5:35926576-35926576	not_differential	FALSE
OCR_129624	chr5	35926289	35926865	AGXT2	ENSG00000113492.9	HiC_8hr_4kb	rs138912305	0.048597	chr5	35926774	3.88922	6.9909	0.000626065	rs10214237	0.863832	ECZ	chr5:35926774-35926774	not_differential	FALSE
OCR_129624	chr5	35926289	35926865	CTD-2113L7.1	ENSG00000248969.1	HiC_0hr_4kb:HiC_24hr_4kb	rs111459942	9.84374e-07	chr5	35926576	23.9584	159408	0.00952108	rs11954020	0.872589	T1D	chr5:35926576-35926576	not_differential	FALSE
OCR_129624	chr5	35926289	35926865	CTD-2113L7.1	ENSG00000248969.1	HiC_0hr_4kb:HiC_24hr_4kb	rs138912305	0.048597	chr5	35926774	3.88922	6.9909	0.000626065	rs10214237	0.863832	ECZ	chr5:35926774-35926774	not_differential	FALSE
OCR_129624	chr5	35926289	35926865	DNAJC21	ENSG00000168724.10	HiC_0hr_4kb:HiC_8hr_4kb	rs111459942	9.84374e-07	chr5	35926576	23.9584	159408	0.00952108	rs11954020	0.872589	T1D	chr5:35926576-35926576	3	FALSE
OCR_129624	chr5	35926289	35926865	DNAJC21	ENSG00000168724.10	HiC_0hr_4kb:HiC_8hr_4kb	rs138912305	0.048597	chr5	35926774	3.88922	6.9909	0.000626065	rs10214237	0.863832	ECZ	chr5:35926774-35926774	3	FALSE
OCR_129624	chr5	35926289	35926865	IL7R	ENSG00000168685.10	HiC_8hr_4kb:HiC_24hr_4kb	rs111459942	9.84374e-07	chr5	35926576	23.9584	159408	0.00952108	rs11954020	0.872589	T1D	chr5:35926576-35926576	4	FALSE
OCR_129624	chr5	35926289	35926865	IL7R	ENSG00000168685.10	HiC_8hr_4kb:HiC_24hr_4kb	rs138912305	0.048597	chr5	35926774	3.88922	6.9909	0.000626065	rs10214237	0.863832	ECZ	chr5:35926774-35926774	4	FALSE
OCR_129624	chr5	35926289	35926865	PRLR	ENSG00000113494.12	HiC_0hr_1kb:HiC_0hr_2kb:HiC_0hr_4kb:HiC_8hr_2kb:HiC_8hr_4kb:HiC_24hr_2kb:HiC_24hr_4kb	rs111459942	9.84374e-07	chr5	35926576	23.9584	159408	0.00952108	rs11954020	0.872589	T1D	chr5:35926576-35926576	2	FALSE
OCR_129624	chr5	35926289	35926865	PRLR	ENSG00000113494.12	HiC_0hr_1kb:HiC_0hr_2kb:HiC_0hr_4kb:HiC_8hr_2kb:HiC_8hr_4kb:HiC_24hr_2kb:HiC_24hr_4kb	rs138912305	0.048597	chr5	35926774	3.88922	6.9909	0.000626065	rs10214237	0.863832	ECZ	chr5:35926774-35926774	2	FALSE
OCR_129624	chr5	35926289	35926865	RAD1	ENSG00000113456.14	HiC_0hr_4kb:HiC_8hr_4kb	rs111459942	9.84374e-07	chr5	35926576	23.9584	159408	0.00952108	rs11954020	0.872589	T1D	chr5:35926576-35926576	3	FALSE
OCR_129624	chr5	35926289	35926865	RAD1	ENSG00000113456.14	HiC_0hr_4kb:HiC_8hr_4kb	rs138912305	0.048597	chr5	35926774	3.88922	6.9909	0.000626065	rs10214237	0.863832	ECZ	chr5:35926774-35926774	3	FALSE
OCR_129624	chr5	35926289	35926865	RNU7-130P	ENSG00000238441.1	HiC_0hr_2kb:HiC_0hr_4kb:HiC_8hr_2kb:HiC_8hr_4kb:HiC_24hr_4kb	rs111459942	9.84374e-07	chr5	35926576	23.9584	159408	0.00952108	rs11954020	0.872589	T1D	chr5:35926576-35926576	not_differential	FALSE
OCR_129624	chr5	35926289	35926865	RNU7-130P	ENSG00000238441.1	HiC_0hr_2kb:HiC_0hr_4kb:HiC_8hr_2kb:HiC_8hr_4kb:HiC_24hr_4kb	rs138912305	0.048597	chr5	35926774	3.88922	6.9909	0.000626065	rs10214237	0.863832	ECZ	chr5:35926774-35926774	not_differential	FALSE
OCR_129624	chr5	35926289	35926865	SPEF2	ENSG00000152582.8	HiC_0hr_1kb:HiC_0hr_2kb:HiC_0hr_4kb:HiC_8hr_1kb:HiC_8hr_2kb:HiC_8hr_4kb:HiC_24hr_2kb:HiC_24hr_4kb	rs111459942	9.84374e-07	chr5	35926576	23.9584	159408	0.00952108	rs11954020	0.872589	T1D	chr5:35926576-35926576	not_differential	FALSE
OCR_129624	chr5	35926289	35926865	SPEF2	ENSG00000152582.8	HiC_0hr_1kb:HiC_0hr_2kb:HiC_0hr_4kb:HiC_8hr_1kb:HiC_8hr_2kb:HiC_8hr_4kb:HiC_24hr_2kb:HiC_24hr_4kb	rs138912305	0.048597	chr5	35926774	3.88922	6.9909	0.000626065	rs10214237	0.863832	ECZ	chr5:35926774-35926774	not_differential	FALSE
OCR_129625	chr5	35954128	35954729	AC010368.2	ENSG00000269027.1	HiC_0hr_4kb:HiC_8hr_4kb:HiC_24hr_4kb	rs700165	0.143488	chr5	35954143	2.14015	2.9156	0.000261104	rs10214237	0.942213	ECZ	chr5:35954143-35954143	not_differential	FALSE
OCR_129625	chr5	35954128	35954729	AC010368.2	ENSG00000269027.1	HiC_0hr_4kb:HiC_8hr_4kb:HiC_24hr_4kb	rs77266170	0.02458	chr5	35954149	5.05324	12.5111	0.00112042	rs10214237	0.807164	ECZ	chr5:35954149-35954149	not_differential	FALSE
OCR_129625	chr5	35954128	35954729	AC010368.2	ENSG00000269027.1	HiC_0hr_4kb:HiC_8hr_4kb:HiC_24hr_4kb	rs77931459	0.160306	chr5	35954191	1.97134	2.6796	0.00023997	rs10214237	0.946759	ECZ	chr5:35954191-35954191	not_differential	FALSE
OCR_129625	chr5	35954128	35954729	AC010368.2	ENSG00000269027.1	HiC_0hr_4kb:HiC_8hr_4kb:HiC_24hr_4kb	rs80156976	0.024442	chr5	35954615	5.06299	12.5723	0.0011259	rs10214237	0.806044	ECZ	chr5:35954615-35954615	not_differential	FALSE
OCR_129625	chr5	35954128	35954729	AGXT2	ENSG00000113492.9	HiC_0hr_4kb:HiC_8hr_4kb:HiC_24hr_4kb	rs700165	0.143488	chr5	35954143	2.14015	2.9156	0.000261104	rs10214237	0.942213	ECZ	chr5:35954143-35954143	not_differential	FALSE
OCR_129625	chr5	35954128	35954729	AGXT2	ENSG00000113492.9	HiC_0hr_4kb:HiC_8hr_4kb:HiC_24hr_4kb	rs77266170	0.02458	chr5	35954149	5.05324	12.5111	0.00112042	rs10214237	0.807164	ECZ	chr5:35954149-35954149	not_differential	FALSE
OCR_129625	chr5	35954128	35954729	AGXT2	ENSG00000113492.9	HiC_0hr_4kb:HiC_8hr_4kb:HiC_24hr_4kb	rs77931459	0.160306	chr5	35954191	1.97134	2.6796	0.00023997	rs10214237	0.946759	ECZ	chr5:35954191-35954191	not_differential	FALSE
OCR_129625	chr5	35954128	35954729	AGXT2	ENSG00000113492.9	HiC_0hr_4kb:HiC_8hr_4kb:HiC_24hr_4kb	rs80156976	0.024442	chr5	35954615	5.06299	12.5723	0.0011259	rs10214237	0.806044	ECZ	chr5:35954615-35954615	not_differential	FALSE
OCR_129625	chr5	35954128	35954729	DNAJC21	ENSG00000168724.10	HiC_8hr_4kb	rs700165	0.143488	chr5	35954143	2.14015	2.9156	0.000261104	rs10214237	0.942213	ECZ	chr5:35954143-35954143	3	FALSE
OCR_129625	chr5	35954128	35954729	DNAJC21	ENSG00000168724.10	HiC_8hr_4kb	rs77266170	0.02458	chr5	35954149	5.05324	12.5111	0.00112042	rs10214237	0.807164	ECZ	chr5:35954149-35954149	3	FALSE
OCR_129625	chr5	35954128	35954729	DNAJC21	ENSG00000168724.10	HiC_8hr_4kb	rs77931459	0.160306	chr5	35954191	1.97134	2.6796	0.00023997	rs10214237	0.946759	ECZ	chr5:35954191-35954191	3	FALSE
OCR_129625	chr5	35954128	35954729	DNAJC21	ENSG00000168724.10	HiC_8hr_4kb	rs80156976	0.024442	chr5	35954615	5.06299	12.5723	0.0011259	rs10214237	0.806044	ECZ	chr5:35954615-35954615	3	FALSE
OCR_129625	chr5	35954128	35954729	PRLR	ENSG00000113494.12	HiC_0hr_4kb:HiC_8hr_4kb:HiC_24hr_4kb	rs700165	0.143488	chr5	35954143	2.14015	2.9156	0.000261104	rs10214237	0.942213	ECZ	chr5:35954143-35954143	2	FALSE
OCR_129625	chr5	35954128	35954729	PRLR	ENSG00000113494.12	HiC_0hr_4kb:HiC_8hr_4kb:HiC_24hr_4kb	rs77266170	0.02458	chr5	35954149	5.05324	12.5111	0.00112042	rs10214237	0.807164	ECZ	chr5:35954149-35954149	2	FALSE
OCR_129625	chr5	35954128	35954729	PRLR	ENSG00000113494.12	HiC_0hr_4kb:HiC_8hr_4kb:HiC_24hr_4kb	rs77931459	0.160306	chr5	35954191	1.97134	2.6796	0.00023997	rs10214237	0.946759	ECZ	chr5:35954191-35954191	2	FALSE
OCR_129625	chr5	35954128	35954729	PRLR	ENSG00000113494.12	HiC_0hr_4kb:HiC_8hr_4kb:HiC_24hr_4kb	rs80156976	0.024442	chr5	35954615	5.06299	12.5723	0.0011259	rs10214237	0.806044	ECZ	chr5:35954615-35954615	2	FALSE
OCR_129625	chr5	35954128	35954729	RNU7-130P	ENSG00000238441.1	HiC_0hr_4kb:HiC_8hr_4kb:HiC_24hr_4kb	rs700165	0.143488	chr5	35954143	2.14015	2.9156	0.000261104	rs10214237	0.942213	ECZ	chr5:35954143-35954143	not_differential	FALSE
OCR_129625	chr5	35954128	35954729	RNU7-130P	ENSG00000238441.1	HiC_0hr_4kb:HiC_8hr_4kb:HiC_24hr_4kb	rs77266170	0.02458	chr5	35954149	5.05324	12.5111	0.00112042	rs10214237	0.807164	ECZ	chr5:35954149-35954149	not_differential	FALSE
OCR_129625	chr5	35954128	35954729	RNU7-130P	ENSG00000238441.1	HiC_0hr_4kb:HiC_8hr_4kb:HiC_24hr_4kb	rs77931459	0.160306	chr5	35954191	1.97134	2.6796	0.00023997	rs10214237	0.946759	ECZ	chr5:35954191-35954191	not_differential	FALSE
OCR_129625	chr5	35954128	35954729	RNU7-130P	ENSG00000238441.1	HiC_0hr_4kb:HiC_8hr_4kb:HiC_24hr_4kb	rs80156976	0.024442	chr5	35954615	5.06299	12.5723	0.0011259	rs10214237	0.806044	ECZ	chr5:35954615-35954615	not_differential	FALSE
OCR_129625	chr5	35954128	35954729	SPEF2	ENSG00000152582.8	HiC_0hr_4kb:HiC_24hr_4kb	rs700165	0.143488	chr5	35954143	2.14015	2.9156	0.000261104	rs10214237	0.942213	ECZ	chr5:35954143-35954143	not_differential	FALSE
OCR_129625	chr5	35954128	35954729	SPEF2	ENSG00000152582.8	HiC_0hr_4kb:HiC_24hr_4kb	rs77266170	0.02458	chr5	35954149	5.05324	12.5111	0.00112042	rs10214237	0.807164	ECZ	chr5:35954149-35954149	not_differential	FALSE
OCR_129625	chr5	35954128	35954729	SPEF2	ENSG00000152582.8	HiC_0hr_4kb:HiC_24hr_4kb	rs77931459	0.160306	chr5	35954191	1.97134	2.6796	0.00023997	rs10214237	0.946759	ECZ	chr5:35954191-35954191	not_differential	FALSE
OCR_129625	chr5	35954128	35954729	SPEF2	ENSG00000152582.8	HiC_0hr_4kb:HiC_24hr_4kb	rs80156976	0.024442	chr5	35954615	5.06299	12.5723	0.0011259	rs10214237	0.806044	ECZ	chr5:35954615-35954615	not_differential	FALSE
OCR_129858	chr5	40383995	40384714	PTGER4	ENSG00000171522.5	HiC_0hr_4kb:HiC_8hr_2kb:HiC_8hr_4kb:HiC_24hr_4kb	rs895123	2.817e-08	chr5	40384061	30.8297	4.94965e+06	0.0176185	rs11742570	0.553758	UC	chr5:40384061-40384061	1	FALSE
OCR_129858	chr5	40383995	40384714	SNORA63	ENSG00000199552.1	HiC_0hr_4kb	rs895123	2.817e-08	chr5	40384061	30.8297	4.94965e+06	0.0176185	rs11742570	0.553758	UC	chr5:40384061-40384061	not_differential	FALSE
OCR_129859	chr5	40384807	40385497	PTGER4	ENSG00000171522.5	HiC_0hr_4kb:HiC_8hr_2kb:HiC_8hr_4kb:HiC_24hr_4kb	rs10473187	2.14e-08	chr5	40385134	31.3632	6.46294e+06	0.0509871	rs6880778	0.336898	MS	chr5:40385134-40385134	1	FALSE
OCR_129859	chr5	40384807	40385497	SNORA63	ENSG00000199552.1	HiC_0hr_4kb	rs10473187	2.14e-08	chr5	40385134	31.3632	6.46294e+06	0.0509871	rs6880778	0.336898	MS	chr5:40385134-40385134	not_differential	FALSE
OCR_129862	chr5	40398190	40398547	PTGER4	ENSG00000171522.5	HiC_0hr_2kb:HiC_0hr_4kb:HiC_8hr_4kb:HiC_24hr_4kb	rs17826145	3.92e-08	chr5	40398190	30.1886	3.59235e+06	0.0127871	rs11742570	0.80871	UC	chr5:40398190-40398190	1	FALSE
OCR_129862	chr5	40398190	40398547	SNORA63	ENSG00000199552.1	HiC_0hr_4kb	rs17826145	3.92e-08	chr5	40398190	30.1886	3.59235e+06	0.0127871	rs11742570	0.80871	UC	chr5:40398190-40398190	not_differential	FALSE
OCR_129863	chr5	40401418	40401748	PTGER4	ENSG00000171522.5	HiC_0hr_2kb:HiC_0hr_4kb:HiC_8hr_4kb:HiC_24hr_4kb	rs17234657	3.57e-08	chr5	40401509	30.37	3.93342e+06	0.0140012	rs11742570	0.755116	UC	chr5:40401509-40401509	1	FALSE
OCR_129863	chr5	40401418	40401748	SNORA63	ENSG00000199552.1	HiC_0hr_4kb	rs17234657	3.57e-08	chr5	40401509	30.37	3.93342e+06	0.0140012	rs11742570	0.755116	UC	chr5:40401509-40401509	not_differential	FALSE
OCR_129864	chr5	40402119	40402419	PTGER4	ENSG00000171522.5	HiC_0hr_2kb:HiC_0hr_4kb:HiC_8hr_2kb:HiC_8hr_4kb:HiC_24hr_2kb:HiC_24hr_4kb	rs6879283	3.525e-08	chr5	40402233	30.3946	3.98211e+06	0.0141745	rs11742570	0.741115	UC	chr5:40402233-40402233	1	FALSE
OCR_129864	chr5	40402119	40402419	SNORA63	ENSG00000199552.1	HiC_0hr_4kb	rs6879283	3.525e-08	chr5	40402233	30.3946	3.98211e+06	0.0141745	rs11742570	0.741115	UC	chr5:40402233-40402233	not_differential	FALSE
OCR_129868	chr5	40410264	40411268	PTGER4	ENSG00000171522.5	HiC_0hr_2kb:HiC_0hr_4kb:HiC_8hr_2kb:HiC_8hr_4kb:HiC_24hr_2kb:HiC_24hr_4kb	rs11742570	1.105e-55	chr5	40410584	247.115	4.57497e+53	0.0821324	rs11742570	0.392223	CRO	chr5:40410584-40410584	1	FALSE
OCR_129868	chr5	40410264	40411268	PTGER4	ENSG00000171522.5	HiC_0hr_2kb:HiC_0hr_4kb:HiC_8hr_2kb:HiC_8hr_4kb:HiC_24hr_2kb:HiC_24hr_4kb	rs11742570	3.641e-40	chr5	40410584	175.989	1.64264e+38	0.0978794	rs11742570	0.397748	IBD	chr5:40410584-40410584	1	FALSE
OCR_129868	chr5	40410264	40411268	PTGER4	ENSG00000171522.5	HiC_0hr_2kb:HiC_0hr_4kb:HiC_8hr_2kb:HiC_8hr_4kb:HiC_24hr_2kb:HiC_24hr_4kb	rs11742570	2.08e-08	chr5	40410584	31.4184	6.64385e+06	0.0524143	rs6880778	0.285911	MS	chr5:40410584-40410584	1	FALSE
OCR_129868	chr5	40410264	40411268	PTGER4	ENSG00000171522.5	HiC_0hr_2kb:HiC_0hr_4kb:HiC_8hr_2kb:HiC_8hr_4kb:HiC_24hr_2kb:HiC_24hr_4kb	rs11739261	1.027e-07	chr5	40410739	28.3224	1.41297e+06	0.00502954	rs11742570	0.931987	UC	chr5:40410739-40410739	1	FALSE
OCR_129868	chr5	40410264	40411268	PTGER4	ENSG00000171522.5	HiC_0hr_2kb:HiC_0hr_4kb:HiC_8hr_2kb:HiC_8hr_4kb:HiC_24hr_2kb:HiC_24hr_4kb	rs6451493	8.59e-56	chr5	40410935	247.617	5.87923e+53	0.105547	rs11742570	0.215321	CRO	chr5:40410935-40410935	1	FALSE
OCR_129868	chr5	40410264	40411268	PTGER4	ENSG00000171522.5	HiC_0hr_2kb:HiC_0hr_4kb:HiC_8hr_2kb:HiC_8hr_4kb:HiC_24hr_2kb:HiC_24hr_4kb	rs6451493	3.581e-40	chr5	40410935	176.022	1.67001e+38	0.0995102	rs11742570	0.201775	IBD	chr5:40410935-40410935	1	FALSE
OCR_129868	chr5	40410264	40411268	PTGER4	ENSG00000171522.5	HiC_0hr_2kb:HiC_0hr_4kb:HiC_8hr_2kb:HiC_8hr_4kb:HiC_24hr_2kb:HiC_24hr_4kb	rs6451493	2.9e-08	chr5	40410935	30.7733	4.81214e+06	0.0379637	rs6880778	0.742986	MS	chr5:40410935-40410935	1	FALSE
OCR_129868	chr5	40410264	40411268	SNORA63	ENSG00000199552.1	HiC_0hr_2kb:HiC_0hr_4kb:HiC_8hr_4kb	rs11742570	1.105e-55	chr5	40410584	247.115	4.57497e+53	0.0821324	rs11742570	0.392223	CRO	chr5:40410584-40410584	not_differential	FALSE
OCR_129868	chr5	40410264	40411268	SNORA63	ENSG00000199552.1	HiC_0hr_2kb:HiC_0hr_4kb:HiC_8hr_4kb	rs11742570	3.641e-40	chr5	40410584	175.989	1.64264e+38	0.0978794	rs11742570	0.397748	IBD	chr5:40410584-40410584	not_differential	FALSE
OCR_129868	chr5	40410264	40411268	SNORA63	ENSG00000199552.1	HiC_0hr_2kb:HiC_0hr_4kb:HiC_8hr_4kb	rs11742570	2.08e-08	chr5	40410584	31.4184	6.64385e+06	0.0524143	rs6880778	0.285911	MS	chr5:40410584-40410584	not_differential	FALSE
OCR_129868	chr5	40410264	40411268	SNORA63	ENSG00000199552.1	HiC_0hr_2kb:HiC_0hr_4kb:HiC_8hr_4kb	rs11739261	1.027e-07	chr5	40410739	28.3224	1.41297e+06	0.00502954	rs11742570	0.931987	UC	chr5:40410739-40410739	not_differential	FALSE
OCR_129868	chr5	40410264	40411268	SNORA63	ENSG00000199552.1	HiC_0hr_2kb:HiC_0hr_4kb:HiC_8hr_4kb	rs6451493	8.59e-56	chr5	40410935	247.617	5.87923e+53	0.105547	rs11742570	0.215321	CRO	chr5:40410935-40410935	not_differential	FALSE
OCR_129868	chr5	40410264	40411268	SNORA63	ENSG00000199552.1	HiC_0hr_2kb:HiC_0hr_4kb:HiC_8hr_4kb	rs6451493	3.581e-40	chr5	40410935	176.022	1.67001e+38	0.0995102	rs11742570	0.201775	IBD	chr5:40410935-40410935	not_differential	FALSE
OCR_129868	chr5	40410264	40411268	SNORA63	ENSG00000199552.1	HiC_0hr_2kb:HiC_0hr_4kb:HiC_8hr_4kb	rs6451493	2.9e-08	chr5	40410935	30.7733	4.81214e+06	0.0379637	rs6880778	0.742986	MS	chr5:40410935-40410935	not_differential	FALSE
OCR_129873	chr5	40436574	40437245	PTGER4	ENSG00000171522.5	HiC_0hr_2kb:HiC_0hr_4kb:HiC_8hr_2kb:HiC_8hr_4kb:HiC_24hr_4kb	rs7734434	4.77909e-05	chr5	40436698	16.5338	3892.84	0.0365495	rs12186979	0.872854	AS	chr5:40436698-40436698	1	FALSE
OCR_129873	chr5	40436574	40437245	PTGER4	ENSG00000171522.5	HiC_0hr_2kb:HiC_0hr_4kb:HiC_8hr_2kb:HiC_8hr_4kb:HiC_24hr_4kb	rs7734434	1.079e-07	chr5	40436698	28.2268	1.34702e+06	0.00479476	rs11742570	0.936782	UC	chr5:40436698-40436698	1	FALSE
OCR_129874	chr5	40437554	40437971	PTGER4	ENSG00000171522.5	HiC_0hr_2kb:HiC_0hr_4kb:HiC_8hr_2kb:HiC_8hr_4kb:HiC_24hr_4kb	rs9292777	6.02e-08	chr5	40437948	29.357	2.37019e+06	0.0186988	rs6880778	0.872711	MS	chr5:40437948-40437948	1	FALSE
OCR_129882	chr5	40486500	40487226	PTGER4	ENSG00000171522.5	HiC_0hr_4kb:HiC_8hr_2kb:HiC_8hr_4kb:HiC_24hr_2kb:HiC_24hr_4kb	rs7720838	1.272e-07	chr5	40486896	27.9083	1.14874e+06	0.0529315	rs7714574	0.572533	ALG	chr5:40486896-40486896	1	FALSE
OCR_129882	chr5	40486500	40487226	RNU1-150P	ENSG00000199361.1	HiC_8hr_4kb	rs7720838	1.272e-07	chr5	40486896	27.9083	1.14874e+06	0.0529315	rs7714574	0.572533	ALG	chr5:40486896-40486896	not_differential	FALSE
OCR_129883	chr5	40490524	40491186	PTGER4	ENSG00000171522.5	HiC_0hr_4kb:HiC_8hr_4kb:HiC_24hr_4kb	rs9283753	6.061e-08	chr5	40490609	29.3438	2.35465e+06	0.108498	rs7714574	0.255967	ALG	chr5:40490609-40490609	1	FALSE
OCR_129883	chr5	40490524	40491186	PTGER4	ENSG00000171522.5	HiC_0hr_4kb:HiC_8hr_4kb:HiC_24hr_4kb	rs74570089	0.000100851	chr5	40490667	15.1207	1920.52	0.0180316	rs12186979	0.890885	AS	chr5:40490667-40490667	1	FALSE
OCR_129883	chr5	40490524	40491186	PTGER4	ENSG00000171522.5	HiC_0hr_4kb:HiC_8hr_4kb:HiC_24hr_4kb	rs10440635	6.814e-08	chr5	40490790	29.1169	2.10211e+06	0.096861	rs7714574	0.352828	ALG	chr5:40490790-40490790	1	FALSE
OCR_129883	chr5	40490524	40491186	RNU1-150P	ENSG00000199361.1	HiC_24hr_4kb	rs9283753	6.061e-08	chr5	40490609	29.3438	2.35465e+06	0.108498	rs7714574	0.255967	ALG	chr5:40490609-40490609	not_differential	FALSE
OCR_129883	chr5	40490524	40491186	RNU1-150P	ENSG00000199361.1	HiC_24hr_4kb	rs74570089	0.000100851	chr5	40490667	15.1207	1920.52	0.0180316	rs12186979	0.890885	AS	chr5:40490667-40490667	not_differential	FALSE
OCR_129883	chr5	40490524	40491186	RNU1-150P	ENSG00000199361.1	HiC_24hr_4kb	rs10440635	6.814e-08	chr5	40490790	29.1169	2.10211e+06	0.096861	rs7714574	0.352828	ALG	chr5:40490790-40490790	not_differential	FALSE
OCR_129888	chr5	40514589	40515528	PTGER4	ENSG00000171522.5	HiC_0hr_1kb:HiC_0hr_2kb:HiC_0hr_4kb:HiC_8hr_4kb:HiC_24hr_4kb	rs6451513	1.288e-06	chr5	40514752	23.4411	123073	0.00567095	rs7714574	0.932196	ALG	chr5:40514752-40514752	1	FALSE
OCR_129888	chr5	40514589	40515528	PTGER4	ENSG00000171522.5	HiC_0hr_1kb:HiC_0hr_2kb:HiC_0hr_4kb:HiC_8hr_4kb:HiC_24hr_4kb	rs4957312	1.167e-06	chr5	40515134	23.6309	135325	0.00623553	rs7714574	0.90895	ALG	chr5:40515134-40515134	1	FALSE
OCR_129888	chr5	40514589	40515528	PTGER4	ENSG00000171522.5	HiC_0hr_1kb:HiC_0hr_2kb:HiC_0hr_4kb:HiC_8hr_4kb:HiC_24hr_4kb	rs4957313	1.095e-06	chr5	40515522	23.7534	143877	0.00662959	rs7714574	0.889911	ALG	chr5:40515522-40515522	1	FALSE
OCR_129889	chr5	40515637	40515905	PTGER4	ENSG00000171522.5	HiC_0hr_1kb:HiC_0hr_2kb:HiC_0hr_4kb:HiC_8hr_4kb:HiC_24hr_4kb	rs4957316	1.238e-06	chr5	40515839	23.5172	127850	0.0058911	rs7714574	0.920816	ALG	chr5:40515839-40515839	1	FALSE
OCR_130678	chr5	55438249	55439059	CTD-2031P19.3	ENSG00000227908.3	HiC_0hr_4kb:HiC_8hr_4kb	rs6859219	4.429e-06	chr5	55438580	21.0696	37601.5	0.0185789	rs10065637	0.952298	CRO	chr5:55438580-55438580	2	FALSE
OCR_130678	chr5	55438249	55439059	CTD-2031P19.3	ENSG00000227908.3	HiC_0hr_4kb:HiC_8hr_4kb	rs10065637	3.9e-08	chr5	55438851	30.1986	3.61021e+06	0.0693585	rs71624119	0.998758	MS	chr5:55438851-55438851	2	FALSE
OCR_130678	chr5	55438249	55439059	CTD-2227I18.1	ENSG00000249236.1	HiC_0hr_4kb:HiC_8hr_4kb	rs6859219	4.429e-06	chr5	55438580	21.0696	37601.5	0.0185789	rs10065637	0.952298	CRO	chr5:55438580-55438580	not_differential	FALSE
OCR_130678	chr5	55438249	55439059	CTD-2227I18.1	ENSG00000249236.1	HiC_0hr_4kb:HiC_8hr_4kb	rs10065637	3.9e-08	chr5	55438851	30.1986	3.61021e+06	0.0693585	rs71624119	0.998758	MS	chr5:55438851-55438851	not_differential	FALSE
OCR_130678	chr5	55438249	55439059	IL6ST	ENSG00000134352.15	HiC_0hr_4kb:HiC_8hr_4kb:HiC_24hr_4kb	rs6859219	4.429e-06	chr5	55438580	21.0696	37601.5	0.0185789	rs10065637	0.952298	CRO	chr5:55438580-55438580	4	FALSE
OCR_130678	chr5	55438249	55439059	IL6ST	ENSG00000134352.15	HiC_0hr_4kb:HiC_8hr_4kb:HiC_24hr_4kb	rs10065637	3.9e-08	chr5	55438851	30.1986	3.61021e+06	0.0693585	rs71624119	0.998758	MS	chr5:55438851-55438851	4	FALSE
OCR_130678	chr5	55438249	55439059	RNU6-299P	ENSG00000253032.1	HiC_0hr_4kb	rs6859219	4.429e-06	chr5	55438580	21.0696	37601.5	0.0185789	rs10065637	0.952298	CRO	chr5:55438580-55438580	not_differential	FALSE
OCR_130678	chr5	55438249	55439059	RNU6-299P	ENSG00000253032.1	HiC_0hr_4kb	rs10065637	3.9e-08	chr5	55438851	30.1986	3.61021e+06	0.0693585	rs71624119	0.998758	MS	chr5:55438851-55438851	not_differential	FALSE
OCR_130678	chr5	55438249	55439059	snoU13	ENSG00000238326.1	HiC_0hr_4kb:HiC_8hr_4kb	rs6859219	4.429e-06	chr5	55438580	21.0696	37601.5	0.0185789	rs10065637	0.952298	CRO	chr5:55438580-55438580	not_differential	FALSE
OCR_130678	chr5	55438249	55439059	snoU13	ENSG00000238326.1	HiC_0hr_4kb:HiC_8hr_4kb	rs10065637	3.9e-08	chr5	55438851	30.1986	3.61021e+06	0.0693585	rs71624119	0.998758	MS	chr5:55438851-55438851	not_differential	FALSE
OCR_130680	chr5	55444092	55444802	ANKRD55	ENSG00000164512.13	HiC_8hr_4kb	rs7731626	7.3e-24	chr5	55444683	101.458	1.07472e+22	0.999999	rs7731626	0.999999	RA	chr5:55444683-55444683	4	FALSE
OCR_130680	chr5	55444092	55444802	CTD-2031P19.3	ENSG00000227908.3	HiC_0hr_2kb:HiC_0hr_4kb:HiC_8hr_2kb:HiC_8hr_4kb:HiC_24hr_4kb	rs7731626	7.3e-24	chr5	55444683	101.458	1.07472e+22	0.999999	rs7731626	0.999999	RA	chr5:55444683-55444683	2	FALSE
OCR_130680	chr5	55444092	55444802	CTD-2227I18.1	ENSG00000249236.1	HiC_0hr_4kb:HiC_8hr_4kb	rs7731626	7.3e-24	chr5	55444683	101.458	1.07472e+22	0.999999	rs7731626	0.999999	RA	chr5:55444683-55444683	not_differential	FALSE
OCR_130680	chr5	55444092	55444802	IL6ST	ENSG00000134352.15	HiC_0hr_2kb:HiC_0hr_4kb:HiC_8hr_2kb:HiC_8hr_4kb:HiC_24hr_4kb	rs7731626	7.3e-24	chr5	55444683	101.458	1.07472e+22	0.999999	rs7731626	0.999999	RA	chr5:55444683-55444683	4	FALSE
OCR_130680	chr5	55444092	55444802	RNU6-299P	ENSG00000253032.1	HiC_0hr_4kb	rs7731626	7.3e-24	chr5	55444683	101.458	1.07472e+22	0.999999	rs7731626	0.999999	RA	chr5:55444683-55444683	not_differential	FALSE
OCR_130680	chr5	55444092	55444802	snoU13	ENSG00000238326.1	HiC_0hr_2kb:HiC_0hr_4kb:HiC_8hr_4kb:HiC_24hr_4kb	rs7731626	7.3e-24	chr5	55444683	101.458	1.07472e+22	0.999999	rs7731626	0.999999	RA	chr5:55444683-55444683	not_differential	FALSE
OCR_1309	chr1	24518413	24518752	NCMAP	ENSG00000184454.6	HiC_0hr_2kb:HiC_0hr_4kb:HiC_8hr_4kb:HiC_24hr_4kb	rs7552167	0.000464952	chr1	24518643	12.2512	457.426	0.752893	rs7552167	0.752893	PSO	chr1:24518643-24518643	not_differential	FALSE
OCR_1309	chr1	24518413	24518752	NIPAL3	ENSG00000001461.12	HiC_0hr_4kb:HiC_8hr_4kb:HiC_24hr_2kb:HiC_24hr_4kb	rs7552167	0.000464952	chr1	24518643	12.2512	457.426	0.752893	rs7552167	0.752893	PSO	chr1:24518643-24518643	not_differential	FALSE
OCR_1309	chr1	24518413	24518752	RCAN3	ENSG00000117602.7	HiC_0hr_4kb:HiC_8hr_4kb:HiC_24hr_4kb	rs7552167	0.000464952	chr1	24518643	12.2512	457.426	0.752893	rs7552167	0.752893	PSO	chr1:24518643-24518643	4	FALSE
OCR_1309	chr1	24518413	24518752	RN7SL857P	ENSG00000266551.1	HiC_0hr_4kb:HiC_8hr_4kb:HiC_24hr_4kb	rs7552167	0.000464952	chr1	24518643	12.2512	457.426	0.752893	rs7552167	0.752893	PSO	chr1:24518643-24518643	not_differential	FALSE
OCR_1309	chr1	24518413	24518752	RP4-594I10.3	ENSG00000264443.1	HiC_0hr_4kb:HiC_24hr_4kb	rs7552167	0.000464952	chr1	24518643	12.2512	457.426	0.752893	rs7552167	0.752893	PSO	chr1:24518643-24518643	not_differential	FALSE
OCR_1309	chr1	24518413	24518752	RP4-706G24.1	ENSG00000231953.1	HiC_0hr_4kb	rs7552167	0.000464952	chr1	24518643	12.2512	457.426	0.752893	rs7552167	0.752893	PSO	chr1:24518643-24518643	not_differential	FALSE
OCR_1309	chr1	24518413	24518752	SRRM1	ENSG00000133226.12	HiC_0hr_2kb:HiC_0hr_4kb:HiC_8hr_2kb:HiC_8hr_4kb:HiC_24hr_2kb:HiC_24hr_4kb	rs7552167	0.000464952	chr1	24518643	12.2512	457.426	0.752893	rs7552167	0.752893	PSO	chr1:24518643-24518643	3	FALSE
OCR_1309	chr1	24518413	24518752	STPG1	ENSG00000001460.13	HiC_0hr_2kb:HiC_0hr_4kb:HiC_8hr_2kb:HiC_8hr_4kb:HiC_24hr_2kb:HiC_24hr_4kb	rs7552167	0.000464952	chr1	24518643	12.2512	457.426	0.752893	rs7552167	0.752893	PSO	chr1:24518643-24518643	5	FALSE
OCR_1309	chr1	24518413	24518752	Y_RNA	ENSG00000239106.1	HiC_0hr_4kb:HiC_8hr_4kb:HiC_24hr_4kb	rs7552167	0.000464952	chr1	24518643	12.2512	457.426	0.752893	rs7552167	0.752893	PSO	chr1:24518643-24518643	not_differential	FALSE
OCR_13280	chr1	198570825	198572189	ATP6V1G3	ENSG00000151418.7	HiC_0hr_2kb:HiC_0hr_4kb:HiC_8hr_4kb:HiC_24hr_4kb	rs1961828	0.00051	chr1	198571098	12.0787	419.629	0.00172416	rs7555082	0.930102	CRO	chr1:198571098-198571098	not_differential	FALSE
OCR_13280	chr1	198570825	198572189	NEK7	ENSG00000151414.10	HiC_8hr_4kb	rs1961828	0.00051	chr1	198571098	12.0787	419.629	0.00172416	rs7555082	0.930102	CRO	chr1:198571098-198571098	not_differential	FALSE
OCR_13280	chr1	198570825	198572189	PTPRC	ENSG00000081237.14	HiC_0hr_4kb:HiC_8hr_2kb:HiC_8hr_4kb	rs1961828	0.00051	chr1	198571098	12.0787	419.629	0.00172416	rs7555082	0.930102	CRO	chr1:198571098-198571098	not_differential	FALSE
OCR_13281	chr1	198574657	198574902	ATP6V1G3	ENSG00000151418.7	HiC_0hr_4kb:HiC_8hr_4kb:HiC_24hr_4kb	rs16843430	0.000561	chr1	198574902	11.9011	383.97	0.00157764	rs7555082	0.93671	CRO	chr1:198574902-198574902	not_differential	FALSE
OCR_13281	chr1	198574657	198574902	NEK7	ENSG00000151414.10	HiC_8hr_4kb	rs16843430	0.000561	chr1	198574902	11.9011	383.97	0.00157764	rs7555082	0.93671	CRO	chr1:198574902-198574902	not_differential	FALSE
OCR_13281	chr1	198574657	198574902	PTPRC	ENSG00000081237.14	HiC_0hr_4kb:HiC_8hr_4kb	rs16843430	0.000561	chr1	198574902	11.9011	383.97	0.00157764	rs7555082	0.93671	CRO	chr1:198574902-198574902	not_differential	FALSE
OCR_13281	chr1	198574657	198574902	RP11-553K8.2	ENSG00000223881.1	HiC_0hr_2kb	rs16843430	0.000561	chr1	198574902	11.9011	383.97	0.00157764	rs7555082	0.93671	CRO	chr1:198574902-198574902	not_differential	FALSE
OCR_13289	chr1	198589469	198589658	ATP6V1G3	ENSG00000151418.7	HiC_0hr_4kb:HiC_8hr_4kb	rs1326265	0.0009202	chr1	198589491	10.9816	242.453	0.000996183	rs7555082	0.949607	CRO	chr1:198589491-198589491	not_differential	FALSE
OCR_13289	chr1	198589469	198589658	ATP6V1G3	ENSG00000151418.7	HiC_0hr_4kb:HiC_8hr_4kb	rs1326266	0.0006164	chr1	198589576	11.7258	351.74	0.00144522	rs7555082	0.944254	CRO	chr1:198589576-198589576	not_differential	FALSE
OCR_13289	chr1	198589469	198589658	NEK7	ENSG00000151414.10	HiC_8hr_4kb	rs1326265	0.0009202	chr1	198589491	10.9816	242.453	0.000996183	rs7555082	0.949607	CRO	chr1:198589491-198589491	not_differential	FALSE
OCR_13289	chr1	198589469	198589658	NEK7	ENSG00000151414.10	HiC_8hr_4kb	rs1326266	0.0006164	chr1	198589576	11.7258	351.74	0.00144522	rs7555082	0.944254	CRO	chr1:198589576-198589576	not_differential	FALSE
OCR_13289	chr1	198589469	198589658	PTPRC	ENSG00000081237.14	HiC_0hr_2kb:HiC_0hr_4kb:HiC_8hr_4kb	rs1326265	0.0009202	chr1	198589491	10.9816	242.453	0.000996183	rs7555082	0.949607	CRO	chr1:198589491-198589491	not_differential	FALSE
OCR_13289	chr1	198589469	198589658	PTPRC	ENSG00000081237.14	HiC_0hr_2kb:HiC_0hr_4kb:HiC_8hr_4kb	rs1326266	0.0006164	chr1	198589576	11.7258	351.74	0.00144522	rs7555082	0.944254	CRO	chr1:198589576-198589576	not_differential	FALSE
OCR_13289	chr1	198589469	198589658	RP11-553K8.5	ENSG00000261573.1	HiC_0hr_2kb:HiC_0hr_4kb	rs1326265	0.0009202	chr1	198589491	10.9816	242.453	0.000996183	rs7555082	0.949607	CRO	chr1:198589491-198589491	not_differential	FALSE
OCR_13289	chr1	198589469	198589658	RP11-553K8.5	ENSG00000261573.1	HiC_0hr_2kb:HiC_0hr_4kb	rs1326266	0.0006164	chr1	198589576	11.7258	351.74	0.00144522	rs7555082	0.944254	CRO	chr1:198589576-198589576	not_differential	FALSE
OCR_13307	chr1	198627989	198628148	ATP6V1G3	ENSG00000151418.7	HiC_0hr_4kb	rs76621070	0.000899	chr1	198627999	11.0248	247.747	0.00101794	rs7555082	0.946603	CRO	chr1:198627999-198627999	not_differential	FALSE
OCR_13307	chr1	198627989	198628148	NEK7	ENSG00000151414.10	HiC_0hr_4kb	rs76621070	0.000899	chr1	198627999	11.0248	247.747	0.00101794	rs7555082	0.946603	CRO	chr1:198627999-198627999	not_differential	FALSE
OCR_13307	chr1	198627989	198628148	PTPRC	ENSG00000081237.14	HiC_0hr_4kb	rs76621070	0.000899	chr1	198627999	11.0248	247.747	0.00101794	rs7555082	0.946603	CRO	chr1:198627999-198627999	not_differential	FALSE
OCR_13307	chr1	198627989	198628148	RP11-553K8.2	ENSG00000223881.1	HiC_0hr_4kb	rs76621070	0.000899	chr1	198627999	11.0248	247.747	0.00101794	rs7555082	0.946603	CRO	chr1:198627999-198627999	not_differential	FALSE
OCR_13307	chr1	198627989	198628148	RP11-553K8.5	ENSG00000261573.1	HiC_0hr_2kb:HiC_0hr_4kb	rs76621070	0.000899	chr1	198627999	11.0248	247.747	0.00101794	rs7555082	0.946603	CRO	chr1:198627999-198627999	not_differential	FALSE
OCR_133123	chr5	96159528	96159827	CAST	ENSG00000153113.19	HiC_0hr_4kb	rs72773986	0.1649	chr5	96159717	1.92871	2.62309	0.000348502	rs1363907	0.910592	UC	chr5:96159717-96159717	not_differential	FALSE
OCR_133123	chr5	96159528	96159827	CTD-2007H13.3	ENSG00000248489.1	HiC_0hr_4kb	rs72773986	0.1649	chr5	96159717	1.92871	2.62309	0.000348502	rs1363907	0.910592	UC	chr5:96159717-96159717	not_differential	FALSE
OCR_133123	chr5	96159528	96159827	CTD-2260A17.3	ENSG00000272109.1	HiC_0hr_4kb	rs72773986	0.1649	chr5	96159717	1.92871	2.62309	0.000348502	rs1363907	0.910592	UC	chr5:96159717-96159717	not_differential	FALSE
OCR_133123	chr5	96159528	96159827	ERAP1	ENSG00000164307.8	HiC_0hr_4kb	rs72773986	0.1649	chr5	96159717	1.92871	2.62309	0.000348502	rs1363907	0.910592	UC	chr5:96159717-96159717	not_differential	FALSE
OCR_133123	chr5	96159528	96159827	LIX1	ENSG00000145721.7	HiC_0hr_4kb	rs72773986	0.1649	chr5	96159717	1.92871	2.62309	0.000348502	rs1363907	0.910592	UC	chr5:96159717-96159717	not_differential	FALSE
OCR_133123	chr5	96159528	96159827	RIOK2	ENSG00000058729.6	HiC_0hr_4kb:HiC_8hr_4kb	rs72773986	0.1649	chr5	96159717	1.92871	2.62309	0.000348502	rs1363907	0.910592	UC	chr5:96159717-96159717	1	FALSE
OCR_133123	chr5	96159528	96159827	RNU1-73P	ENSG00000206698.1	HiC_0hr_4kb	rs72773986	0.1649	chr5	96159717	1.92871	2.62309	0.000348502	rs1363907	0.910592	UC	chr5:96159717-96159717	not_differential	FALSE
OCR_133123	chr5	96159528	96159827	RP11-155G15.2	ENSG00000251513.1	HiC_8hr_4kb	rs72773986	0.1649	chr5	96159717	1.92871	2.62309	0.000348502	rs1363907	0.910592	UC	chr5:96159717-96159717	not_differential	FALSE
OCR_133124	chr5	96171381	96172065	CAST	ENSG00000153113.19	HiC_0hr_4kb	rs117039421	0.1693	chr5	96171647	1.88913	2.5717	0.000341673	rs1363907	0.911627	UC	chr5:96171647-96171647	not_differential	FALSE
OCR_133124	chr5	96171381	96172065	CAST	ENSG00000153113.19	HiC_0hr_4kb	rs12522976	0.1904	chr5	96171776	1.71452	2.35669	0.000313108	rs1363907	0.916181	UC	chr5:96171776-96171776	not_differential	FALSE
OCR_133124	chr5	96171381	96172065	CAST	ENSG00000153113.19	HiC_0hr_4kb	rs12522460	0.184	chr5	96171829	1.76502	2.41695	0.000321114	rs1363907	0.914597	UC	chr5:96171829-96171829	not_differential	FALSE
OCR_133124	chr5	96171381	96172065	LIX1	ENSG00000145721.7	HiC_0hr_4kb:HiC_8hr_4kb:HiC_24hr_4kb	rs117039421	0.1693	chr5	96171647	1.88913	2.5717	0.000341673	rs1363907	0.911627	UC	chr5:96171647-96171647	not_differential	FALSE
OCR_133124	chr5	96171381	96172065	LIX1	ENSG00000145721.7	HiC_0hr_4kb:HiC_8hr_4kb:HiC_24hr_4kb	rs12522976	0.1904	chr5	96171776	1.71452	2.35669	0.000313108	rs1363907	0.916181	UC	chr5:96171776-96171776	not_differential	FALSE
OCR_133124	chr5	96171381	96172065	LIX1	ENSG00000145721.7	HiC_0hr_4kb:HiC_8hr_4kb:HiC_24hr_4kb	rs12522460	0.184	chr5	96171829	1.76502	2.41695	0.000321114	rs1363907	0.914597	UC	chr5:96171829-96171829	not_differential	FALSE
OCR_133124	chr5	96171381	96172065	LNPEP	ENSG00000113441.11	HiC_0hr_4kb	rs117039421	0.1693	chr5	96171647	1.88913	2.5717	0.000341673	rs1363907	0.911627	UC	chr5:96171647-96171647	4	FALSE
OCR_133124	chr5	96171381	96172065	LNPEP	ENSG00000113441.11	HiC_0hr_4kb	rs12522976	0.1904	chr5	96171776	1.71452	2.35669	0.000313108	rs1363907	0.916181	UC	chr5:96171776-96171776	4	FALSE
OCR_133124	chr5	96171381	96172065	LNPEP	ENSG00000113441.11	HiC_0hr_4kb	rs12522460	0.184	chr5	96171829	1.76502	2.41695	0.000321114	rs1363907	0.914597	UC	chr5:96171829-96171829	4	FALSE
OCR_133124	chr5	96171381	96172065	RIOK2	ENSG00000058729.6	HiC_0hr_4kb:HiC_8hr_4kb:HiC_24hr_4kb	rs117039421	0.1693	chr5	96171647	1.88913	2.5717	0.000341673	rs1363907	0.911627	UC	chr5:96171647-96171647	1	FALSE
OCR_133124	chr5	96171381	96172065	RIOK2	ENSG00000058729.6	HiC_0hr_4kb:HiC_8hr_4kb:HiC_24hr_4kb	rs12522976	0.1904	chr5	96171776	1.71452	2.35669	0.000313108	rs1363907	0.916181	UC	chr5:96171776-96171776	1	FALSE
OCR_133124	chr5	96171381	96172065	RIOK2	ENSG00000058729.6	HiC_0hr_4kb:HiC_8hr_4kb:HiC_24hr_4kb	rs12522460	0.184	chr5	96171829	1.76502	2.41695	0.000321114	rs1363907	0.914597	UC	chr5:96171829-96171829	1	FALSE
OCR_133124	chr5	96171381	96172065	RNU1-73P	ENSG00000206698.1	HiC_0hr_4kb	rs117039421	0.1693	chr5	96171647	1.88913	2.5717	0.000341673	rs1363907	0.911627	UC	chr5:96171647-96171647	not_differential	FALSE
OCR_133124	chr5	96171381	96172065	RNU1-73P	ENSG00000206698.1	HiC_0hr_4kb	rs12522976	0.1904	chr5	96171776	1.71452	2.35669	0.000313108	rs1363907	0.916181	UC	chr5:96171776-96171776	not_differential	FALSE
OCR_133124	chr5	96171381	96172065	RNU1-73P	ENSG00000206698.1	HiC_0hr_4kb	rs12522460	0.184	chr5	96171829	1.76502	2.41695	0.000321114	rs1363907	0.914597	UC	chr5:96171829-96171829	not_differential	FALSE
OCR_133124	chr5	96171381	96172065	RP11-155G15.2	ENSG00000251513.1	HiC_8hr_4kb	rs117039421	0.1693	chr5	96171647	1.88913	2.5717	0.000341673	rs1363907	0.911627	UC	chr5:96171647-96171647	not_differential	FALSE
OCR_133124	chr5	96171381	96172065	RP11-155G15.2	ENSG00000251513.1	HiC_8hr_4kb	rs12522976	0.1904	chr5	96171776	1.71452	2.35669	0.000313108	rs1363907	0.916181	UC	chr5:96171776-96171776	not_differential	FALSE
OCR_133124	chr5	96171381	96172065	RP11-155G15.2	ENSG00000251513.1	HiC_8hr_4kb	rs12522460	0.184	chr5	96171829	1.76502	2.41695	0.000321114	rs1363907	0.914597	UC	chr5:96171829-96171829	not_differential	FALSE
OCR_133125	chr5	96204450	96205125	CAST	ENSG00000153113.19	HiC_0hr_4kb:HiC_8hr_4kb	rs2617450	0.1061	chr5	96204488	2.61137	3.69022	0.000490279	rs1363907	0.881318	UC	chr5:96204488-96204488	not_differential	FALSE
OCR_133125	chr5	96204450	96205125	CAST	ENSG00000153113.19	HiC_0hr_4kb:HiC_8hr_4kb	rs10515251	0.1426	chr5	96204899	2.14968	2.92952	0.000389213	rs1363907	0.902135	UC	chr5:96204899-96204899	not_differential	FALSE
OCR_133125	chr5	96204450	96205125	CTD-2260A17.2	ENSG00000247121.2	HiC_0hr_2kb:HiC_0hr_4kb:HiC_8hr_2kb:HiC_8hr_4kb:HiC_24hr_4kb	rs2617450	0.1061	chr5	96204488	2.61137	3.69022	0.000490279	rs1363907	0.881318	UC	chr5:96204488-96204488	4	FALSE
OCR_133125	chr5	96204450	96205125	CTD-2260A17.2	ENSG00000247121.2	HiC_0hr_2kb:HiC_0hr_4kb:HiC_8hr_2kb:HiC_8hr_4kb:HiC_24hr_4kb	rs10515251	0.1426	chr5	96204899	2.14968	2.92952	0.000389213	rs1363907	0.902135	UC	chr5:96204899-96204899	4	FALSE
OCR_133125	chr5	96204450	96205125	CTD-2260A17.3	ENSG00000272109.1	HiC_0hr_4kb	rs2617450	0.1061	chr5	96204488	2.61137	3.69022	0.000490279	rs1363907	0.881318	UC	chr5:96204488-96204488	not_differential	FALSE
OCR_133125	chr5	96204450	96205125	CTD-2260A17.3	ENSG00000272109.1	HiC_0hr_4kb	rs10515251	0.1426	chr5	96204899	2.14968	2.92952	0.000389213	rs1363907	0.902135	UC	chr5:96204899-96204899	not_differential	FALSE
OCR_133125	chr5	96204450	96205125	ERAP1	ENSG00000164307.8	HiC_0hr_4kb	rs2617450	0.1061	chr5	96204488	2.61137	3.69022	0.000490279	rs1363907	0.881318	UC	chr5:96204488-96204488	not_differential	FALSE
OCR_133125	chr5	96204450	96205125	ERAP1	ENSG00000164307.8	HiC_0hr_4kb	rs10515251	0.1426	chr5	96204899	2.14968	2.92952	0.000389213	rs1363907	0.902135	UC	chr5:96204899-96204899	not_differential	FALSE
OCR_133125	chr5	96204450	96205125	ERAP2	ENSG00000164308.12	HiC_0hr_2kb:HiC_0hr_4kb	rs2617450	0.1061	chr5	96204488	2.61137	3.69022	0.000490279	rs1363907	0.881318	UC	chr5:96204488-96204488	not_differential	FALSE
OCR_133125	chr5	96204450	96205125	ERAP2	ENSG00000164308.12	HiC_0hr_2kb:HiC_0hr_4kb	rs10515251	0.1426	chr5	96204899	2.14968	2.92952	0.000389213	rs1363907	0.902135	UC	chr5:96204899-96204899	not_differential	FALSE
OCR_133125	chr5	96204450	96205125	LIX1	ENSG00000145721.7	HiC_0hr_4kb:HiC_8hr_4kb:HiC_24hr_4kb	rs2617450	0.1061	chr5	96204488	2.61137	3.69022	0.000490279	rs1363907	0.881318	UC	chr5:96204488-96204488	not_differential	FALSE
OCR_133125	chr5	96204450	96205125	LIX1	ENSG00000145721.7	HiC_0hr_4kb:HiC_8hr_4kb:HiC_24hr_4kb	rs10515251	0.1426	chr5	96204899	2.14968	2.92952	0.000389213	rs1363907	0.902135	UC	chr5:96204899-96204899	not_differential	FALSE
OCR_133125	chr5	96204450	96205125	LNPEP	ENSG00000113441.11	HiC_0hr_2kb:HiC_0hr_4kb:HiC_8hr_2kb:HiC_8hr_4kb:HiC_24hr_4kb	rs2617450	0.1061	chr5	96204488	2.61137	3.69022	0.000490279	rs1363907	0.881318	UC	chr5:96204488-96204488	4	FALSE
OCR_133125	chr5	96204450	96205125	LNPEP	ENSG00000113441.11	HiC_0hr_2kb:HiC_0hr_4kb:HiC_8hr_2kb:HiC_8hr_4kb:HiC_24hr_4kb	rs10515251	0.1426	chr5	96204899	2.14968	2.92952	0.000389213	rs1363907	0.902135	UC	chr5:96204899-96204899	4	FALSE
OCR_133125	chr5	96204450	96205125	RIOK2	ENSG00000058729.6	HiC_0hr_4kb:HiC_8hr_4kb:HiC_24hr_4kb	rs2617450	0.1061	chr5	96204488	2.61137	3.69022	0.000490279	rs1363907	0.881318	UC	chr5:96204488-96204488	1	FALSE
OCR_133125	chr5	96204450	96205125	RIOK2	ENSG00000058729.6	HiC_0hr_4kb:HiC_8hr_4kb:HiC_24hr_4kb	rs10515251	0.1426	chr5	96204899	2.14968	2.92952	0.000389213	rs1363907	0.902135	UC	chr5:96204899-96204899	1	FALSE
OCR_133125	chr5	96204450	96205125	RNU1-73P	ENSG00000206698.1	HiC_0hr_4kb:HiC_8hr_4kb:HiC_24hr_4kb	rs2617450	0.1061	chr5	96204488	2.61137	3.69022	0.000490279	rs1363907	0.881318	UC	chr5:96204488-96204488	not_differential	FALSE
OCR_133125	chr5	96204450	96205125	RNU1-73P	ENSG00000206698.1	HiC_0hr_4kb:HiC_8hr_4kb:HiC_24hr_4kb	rs10515251	0.1426	chr5	96204899	2.14968	2.92952	0.000389213	rs1363907	0.902135	UC	chr5:96204899-96204899	not_differential	FALSE
OCR_133125	chr5	96204450	96205125	RP11-155G15.2	ENSG00000251513.1	HiC_0hr_4kb	rs2617450	0.1061	chr5	96204488	2.61137	3.69022	0.000490279	rs1363907	0.881318	UC	chr5:96204488-96204488	not_differential	FALSE
OCR_133125	chr5	96204450	96205125	RP11-155G15.2	ENSG00000251513.1	HiC_0hr_4kb	rs10515251	0.1426	chr5	96204899	2.14968	2.92952	0.000389213	rs1363907	0.902135	UC	chr5:96204899-96204899	not_differential	FALSE
OCR_133125	chr5	96204450	96205125	Y_RNA	ENSG00000200884.1	HiC_0hr_4kb:HiC_8hr_4kb	rs2617450	0.1061	chr5	96204488	2.61137	3.69022	0.000490279	rs1363907	0.881318	UC	chr5:96204488-96204488	not_differential	FALSE
OCR_133125	chr5	96204450	96205125	Y_RNA	ENSG00000200884.1	HiC_0hr_4kb:HiC_8hr_4kb	rs10515251	0.1426	chr5	96204899	2.14968	2.92952	0.000389213	rs1363907	0.902135	UC	chr5:96204899-96204899	not_differential	FALSE
OCR_133126	chr5	96206120	96206614	CAST	ENSG00000153113.19	HiC_0hr_4kb:HiC_8hr_4kb	rs138270923	0.1249	chr5	96206165	2.35477	3.24588	0.000431245	rs1363907	0.893971	UC	chr5:96206165-96206165	not_differential	FALSE
OCR_133126	chr5	96206120	96206614	CAST	ENSG00000153113.19	HiC_0hr_4kb:HiC_8hr_4kb	rs144865827	0.01498	chr5	96206416	5.91882	19.2866	0.0025624	rs1363907	0.535454	UC	chr5:96206416-96206416	not_differential	FALSE
OCR_133126	chr5	96206120	96206614	CTD-2260A17.2	ENSG00000247121.2	HiC_0hr_2kb:HiC_0hr_4kb:HiC_8hr_2kb:HiC_8hr_4kb:HiC_24hr_4kb	rs138270923	0.1249	chr5	96206165	2.35477	3.24588	0.000431245	rs1363907	0.893971	UC	chr5:96206165-96206165	4	FALSE
OCR_133126	chr5	96206120	96206614	CTD-2260A17.2	ENSG00000247121.2	HiC_0hr_2kb:HiC_0hr_4kb:HiC_8hr_2kb:HiC_8hr_4kb:HiC_24hr_4kb	rs144865827	0.01498	chr5	96206416	5.91882	19.2866	0.0025624	rs1363907	0.535454	UC	chr5:96206416-96206416	4	FALSE
OCR_133126	chr5	96206120	96206614	CTD-2260A17.3	ENSG00000272109.1	HiC_0hr_4kb	rs138270923	0.1249	chr5	96206165	2.35477	3.24588	0.000431245	rs1363907	0.893971	UC	chr5:96206165-96206165	not_differential	FALSE
OCR_133126	chr5	96206120	96206614	CTD-2260A17.3	ENSG00000272109.1	HiC_0hr_4kb	rs144865827	0.01498	chr5	96206416	5.91882	19.2866	0.0025624	rs1363907	0.535454	UC	chr5:96206416-96206416	not_differential	FALSE
OCR_133126	chr5	96206120	96206614	ERAP1	ENSG00000164307.8	HiC_0hr_4kb	rs138270923	0.1249	chr5	96206165	2.35477	3.24588	0.000431245	rs1363907	0.893971	UC	chr5:96206165-96206165	not_differential	FALSE
OCR_133126	chr5	96206120	96206614	ERAP1	ENSG00000164307.8	HiC_0hr_4kb	rs144865827	0.01498	chr5	96206416	5.91882	19.2866	0.0025624	rs1363907	0.535454	UC	chr5:96206416-96206416	not_differential	FALSE
OCR_133126	chr5	96206120	96206614	ERAP2	ENSG00000164308.12	HiC_0hr_4kb	rs138270923	0.1249	chr5	96206165	2.35477	3.24588	0.000431245	rs1363907	0.893971	UC	chr5:96206165-96206165	not_differential	FALSE
OCR_133126	chr5	96206120	96206614	ERAP2	ENSG00000164308.12	HiC_0hr_4kb	rs144865827	0.01498	chr5	96206416	5.91882	19.2866	0.0025624	rs1363907	0.535454	UC	chr5:96206416-96206416	not_differential	FALSE
OCR_133126	chr5	96206120	96206614	LIX1	ENSG00000145721.7	HiC_0hr_4kb:HiC_8hr_2kb:HiC_8hr_4kb:HiC_24hr_4kb	rs138270923	0.1249	chr5	96206165	2.35477	3.24588	0.000431245	rs1363907	0.893971	UC	chr5:96206165-96206165	not_differential	FALSE
OCR_133126	chr5	96206120	96206614	LIX1	ENSG00000145721.7	HiC_0hr_4kb:HiC_8hr_2kb:HiC_8hr_4kb:HiC_24hr_4kb	rs144865827	0.01498	chr5	96206416	5.91882	19.2866	0.0025624	rs1363907	0.535454	UC	chr5:96206416-96206416	not_differential	FALSE
OCR_133126	chr5	96206120	96206614	LNPEP	ENSG00000113441.11	HiC_0hr_2kb:HiC_0hr_4kb:HiC_8hr_2kb:HiC_8hr_4kb:HiC_24hr_4kb	rs138270923	0.1249	chr5	96206165	2.35477	3.24588	0.000431245	rs1363907	0.893971	UC	chr5:96206165-96206165	4	FALSE
OCR_133126	chr5	96206120	96206614	LNPEP	ENSG00000113441.11	HiC_0hr_2kb:HiC_0hr_4kb:HiC_8hr_2kb:HiC_8hr_4kb:HiC_24hr_4kb	rs144865827	0.01498	chr5	96206416	5.91882	19.2866	0.0025624	rs1363907	0.535454	UC	chr5:96206416-96206416	4	FALSE
OCR_133126	chr5	96206120	96206614	RIOK2	ENSG00000058729.6	HiC_0hr_4kb:HiC_8hr_4kb:HiC_24hr_4kb	rs138270923	0.1249	chr5	96206165	2.35477	3.24588	0.000431245	rs1363907	0.893971	UC	chr5:96206165-96206165	1	FALSE
OCR_133126	chr5	96206120	96206614	RIOK2	ENSG00000058729.6	HiC_0hr_4kb:HiC_8hr_4kb:HiC_24hr_4kb	rs144865827	0.01498	chr5	96206416	5.91882	19.2866	0.0025624	rs1363907	0.535454	UC	chr5:96206416-96206416	1	FALSE
OCR_133126	chr5	96206120	96206614	RNU1-73P	ENSG00000206698.1	HiC_0hr_4kb:HiC_8hr_4kb:HiC_24hr_4kb	rs138270923	0.1249	chr5	96206165	2.35477	3.24588	0.000431245	rs1363907	0.893971	UC	chr5:96206165-96206165	not_differential	FALSE
OCR_133126	chr5	96206120	96206614	RNU1-73P	ENSG00000206698.1	HiC_0hr_4kb:HiC_8hr_4kb:HiC_24hr_4kb	rs144865827	0.01498	chr5	96206416	5.91882	19.2866	0.0025624	rs1363907	0.535454	UC	chr5:96206416-96206416	not_differential	FALSE
OCR_133126	chr5	96206120	96206614	RP11-155G15.2	ENSG00000251513.1	HiC_0hr_4kb	rs138270923	0.1249	chr5	96206165	2.35477	3.24588	0.000431245	rs1363907	0.893971	UC	chr5:96206165-96206165	not_differential	FALSE
OCR_133126	chr5	96206120	96206614	RP11-155G15.2	ENSG00000251513.1	HiC_0hr_4kb	rs144865827	0.01498	chr5	96206416	5.91882	19.2866	0.0025624	rs1363907	0.535454	UC	chr5:96206416-96206416	not_differential	FALSE
OCR_133126	chr5	96206120	96206614	Y_RNA	ENSG00000200884.1	HiC_0hr_2kb:HiC_0hr_4kb:HiC_8hr_4kb	rs138270923	0.1249	chr5	96206165	2.35477	3.24588	0.000431245	rs1363907	0.893971	UC	chr5:96206165-96206165	not_differential	FALSE
OCR_133126	chr5	96206120	96206614	Y_RNA	ENSG00000200884.1	HiC_0hr_2kb:HiC_0hr_4kb:HiC_8hr_4kb	rs144865827	0.01498	chr5	96206416	5.91882	19.2866	0.0025624	rs1363907	0.535454	UC	chr5:96206416-96206416	not_differential	FALSE
OCR_133128	chr5	96211367	96213072	CTD-2260A17.2	ENSG00000247121.2	HiC_0hr_2kb:HiC_0hr_4kb:HiC_8hr_4kb:HiC_24hr_4kb	rs17087114	0.03471	chr5	96211730	4.45938	9.29701	0.00123519	rs1363907	0.709629	UC	chr5:96211730-96211730	4	FALSE
OCR_133128	chr5	96211367	96213072	CTD-2260A17.2	ENSG00000247121.2	HiC_0hr_2kb:HiC_0hr_4kb:HiC_8hr_4kb:HiC_24hr_4kb	rs1230358	0.01042	chr5	96211741	6.56164	26.5976	0.00353374	rs1363907	0.440782	UC	chr5:96211741-96211741	4	FALSE
OCR_133128	chr5	96211367	96213072	CTD-2260A17.2	ENSG00000247121.2	HiC_0hr_2kb:HiC_0hr_4kb:HiC_8hr_4kb:HiC_24hr_4kb	rs17524572	0.3026	chr5	96212095	1.0627	1.70123	0.000226024	rs1363907	0.942103	UC	chr5:96212095-96212095	4	FALSE
OCR_133128	chr5	96211367	96213072	CTD-2260A17.2	ENSG00000247121.2	HiC_0hr_2kb:HiC_0hr_4kb:HiC_8hr_4kb:HiC_24hr_4kb	rs17087117	0.03269	chr5	96212113	4.56194	9.78617	0.00130018	rs1363907	0.690723	UC	chr5:96212113-96212113	4	FALSE
OCR_133128	chr5	96211367	96213072	CTD-2260A17.2	ENSG00000247121.2	HiC_0hr_2kb:HiC_0hr_4kb:HiC_8hr_4kb:HiC_24hr_4kb	rs17087119	0.04028	chr5	96212637	4.20605	8.19092	0.00108824	rs1363907	0.764257	UC	chr5:96212637-96212637	4	FALSE
OCR_133128	chr5	96211367	96213072	CTD-2260A17.2	ENSG00000247121.2	HiC_0hr_2kb:HiC_0hr_4kb:HiC_8hr_4kb:HiC_24hr_4kb	rs147529760	0.2826	chr5	96212741	1.15454	1.78117	0.000236645	rs1363907	0.938402	UC	chr5:96212741-96212741	4	FALSE
OCR_133128	chr5	96211367	96213072	CTD-2260A17.2	ENSG00000247121.2	HiC_0hr_2kb:HiC_0hr_4kb:HiC_8hr_4kb:HiC_24hr_4kb	rs968218	0.08493	chr5	96212781	2.96794	4.41042	0.000585964	rs1363907	0.867616	UC	chr5:96212781-96212781	4	FALSE
OCR_133128	chr5	96211367	96213072	CTD-2260A17.2	ENSG00000247121.2	HiC_0hr_2kb:HiC_0hr_4kb:HiC_8hr_4kb:HiC_24hr_4kb	rs1230360	0.06345	chr5	96212895	3.44483	5.59803	0.000743749	rs1363907	0.839169	UC	chr5:96212895-96212895	4	FALSE
OCR_133128	chr5	96211367	96213072	CTD-2260A17.3	ENSG00000272109.1	HiC_0hr_4kb	rs17087114	0.03471	chr5	96211730	4.45938	9.29701	0.00123519	rs1363907	0.709629	UC	chr5:96211730-96211730	not_differential	FALSE
OCR_133128	chr5	96211367	96213072	CTD-2260A17.3	ENSG00000272109.1	HiC_0hr_4kb	rs1230358	0.01042	chr5	96211741	6.56164	26.5976	0.00353374	rs1363907	0.440782	UC	chr5:96211741-96211741	not_differential	FALSE
OCR_133128	chr5	96211367	96213072	CTD-2260A17.3	ENSG00000272109.1	HiC_0hr_4kb	rs17524572	0.3026	chr5	96212095	1.0627	1.70123	0.000226024	rs1363907	0.942103	UC	chr5:96212095-96212095	not_differential	FALSE
OCR_133128	chr5	96211367	96213072	CTD-2260A17.3	ENSG00000272109.1	HiC_0hr_4kb	rs17087117	0.03269	chr5	96212113	4.56194	9.78617	0.00130018	rs1363907	0.690723	UC	chr5:96212113-96212113	not_differential	FALSE
OCR_133128	chr5	96211367	96213072	CTD-2260A17.3	ENSG00000272109.1	HiC_0hr_4kb	rs17087119	0.04028	chr5	96212637	4.20605	8.19092	0.00108824	rs1363907	0.764257	UC	chr5:96212637-96212637	not_differential	FALSE
OCR_133128	chr5	96211367	96213072	CTD-2260A17.3	ENSG00000272109.1	HiC_0hr_4kb	rs147529760	0.2826	chr5	96212741	1.15454	1.78117	0.000236645	rs1363907	0.938402	UC	chr5:96212741-96212741	not_differential	FALSE
OCR_133128	chr5	96211367	96213072	CTD-2260A17.3	ENSG00000272109.1	HiC_0hr_4kb	rs968218	0.08493	chr5	96212781	2.96794	4.41042	0.000585964	rs1363907	0.867616	UC	chr5:96212781-96212781	not_differential	FALSE
OCR_133128	chr5	96211367	96213072	CTD-2260A17.3	ENSG00000272109.1	HiC_0hr_4kb	rs1230360	0.06345	chr5	96212895	3.44483	5.59803	0.000743749	rs1363907	0.839169	UC	chr5:96212895-96212895	not_differential	FALSE
OCR_133128	chr5	96211367	96213072	ERAP1	ENSG00000164307.8	HiC_0hr_2kb:HiC_0hr_4kb	rs17087114	0.03471	chr5	96211730	4.45938	9.29701	0.00123519	rs1363907	0.709629	UC	chr5:96211730-96211730	not_differential	FALSE
OCR_133128	chr5	96211367	96213072	ERAP1	ENSG00000164307.8	HiC_0hr_2kb:HiC_0hr_4kb	rs1230358	0.01042	chr5	96211741	6.56164	26.5976	0.00353374	rs1363907	0.440782	UC	chr5:96211741-96211741	not_differential	FALSE
OCR_133128	chr5	96211367	96213072	ERAP1	ENSG00000164307.8	HiC_0hr_2kb:HiC_0hr_4kb	rs17524572	0.3026	chr5	96212095	1.0627	1.70123	0.000226024	rs1363907	0.942103	UC	chr5:96212095-96212095	not_differential	FALSE
OCR_133128	chr5	96211367	96213072	ERAP1	ENSG00000164307.8	HiC_0hr_2kb:HiC_0hr_4kb	rs17087117	0.03269	chr5	96212113	4.56194	9.78617	0.00130018	rs1363907	0.690723	UC	chr5:96212113-96212113	not_differential	FALSE
OCR_133128	chr5	96211367	96213072	ERAP1	ENSG00000164307.8	HiC_0hr_2kb:HiC_0hr_4kb	rs17087119	0.04028	chr5	96212637	4.20605	8.19092	0.00108824	rs1363907	0.764257	UC	chr5:96212637-96212637	not_differential	FALSE
OCR_133128	chr5	96211367	96213072	ERAP1	ENSG00000164307.8	HiC_0hr_2kb:HiC_0hr_4kb	rs147529760	0.2826	chr5	96212741	1.15454	1.78117	0.000236645	rs1363907	0.938402	UC	chr5:96212741-96212741	not_differential	FALSE
OCR_133128	chr5	96211367	96213072	ERAP1	ENSG00000164307.8	HiC_0hr_2kb:HiC_0hr_4kb	rs968218	0.08493	chr5	96212781	2.96794	4.41042	0.000585964	rs1363907	0.867616	UC	chr5:96212781-96212781	not_differential	FALSE
OCR_133128	chr5	96211367	96213072	ERAP1	ENSG00000164307.8	HiC_0hr_2kb:HiC_0hr_4kb	rs1230360	0.06345	chr5	96212895	3.44483	5.59803	0.000743749	rs1363907	0.839169	UC	chr5:96212895-96212895	not_differential	FALSE
OCR_133128	chr5	96211367	96213072	ERAP2	ENSG00000164308.12	HiC_0hr_4kb:HiC_8hr_4kb	rs17087114	0.03471	chr5	96211730	4.45938	9.29701	0.00123519	rs1363907	0.709629	UC	chr5:96211730-96211730	not_differential	FALSE
OCR_133128	chr5	96211367	96213072	ERAP2	ENSG00000164308.12	HiC_0hr_4kb:HiC_8hr_4kb	rs1230358	0.01042	chr5	96211741	6.56164	26.5976	0.00353374	rs1363907	0.440782	UC	chr5:96211741-96211741	not_differential	FALSE
OCR_133128	chr5	96211367	96213072	ERAP2	ENSG00000164308.12	HiC_0hr_4kb:HiC_8hr_4kb	rs17524572	0.3026	chr5	96212095	1.0627	1.70123	0.000226024	rs1363907	0.942103	UC	chr5:96212095-96212095	not_differential	FALSE
OCR_133128	chr5	96211367	96213072	ERAP2	ENSG00000164308.12	HiC_0hr_4kb:HiC_8hr_4kb	rs17087117	0.03269	chr5	96212113	4.56194	9.78617	0.00130018	rs1363907	0.690723	UC	chr5:96212113-96212113	not_differential	FALSE
OCR_133128	chr5	96211367	96213072	ERAP2	ENSG00000164308.12	HiC_0hr_4kb:HiC_8hr_4kb	rs17087119	0.04028	chr5	96212637	4.20605	8.19092	0.00108824	rs1363907	0.764257	UC	chr5:96212637-96212637	not_differential	FALSE
OCR_133128	chr5	96211367	96213072	ERAP2	ENSG00000164308.12	HiC_0hr_4kb:HiC_8hr_4kb	rs147529760	0.2826	chr5	96212741	1.15454	1.78117	0.000236645	rs1363907	0.938402	UC	chr5:96212741-96212741	not_differential	FALSE
OCR_133128	chr5	96211367	96213072	ERAP2	ENSG00000164308.12	HiC_0hr_4kb:HiC_8hr_4kb	rs968218	0.08493	chr5	96212781	2.96794	4.41042	0.000585964	rs1363907	0.867616	UC	chr5:96212781-96212781	not_differential	FALSE
OCR_133128	chr5	96211367	96213072	ERAP2	ENSG00000164308.12	HiC_0hr_4kb:HiC_8hr_4kb	rs1230360	0.06345	chr5	96212895	3.44483	5.59803	0.000743749	rs1363907	0.839169	UC	chr5:96212895-96212895	not_differential	FALSE
OCR_133128	chr5	96211367	96213072	LIX1	ENSG00000145721.7	HiC_0hr_4kb:HiC_8hr_4kb:HiC_24hr_4kb	rs17087114	0.03471	chr5	96211730	4.45938	9.29701	0.00123519	rs1363907	0.709629	UC	chr5:96211730-96211730	not_differential	FALSE
OCR_133128	chr5	96211367	96213072	LIX1	ENSG00000145721.7	HiC_0hr_4kb:HiC_8hr_4kb:HiC_24hr_4kb	rs1230358	0.01042	chr5	96211741	6.56164	26.5976	0.00353374	rs1363907	0.440782	UC	chr5:96211741-96211741	not_differential	FALSE
OCR_133128	chr5	96211367	96213072	LIX1	ENSG00000145721.7	HiC_0hr_4kb:HiC_8hr_4kb:HiC_24hr_4kb	rs17524572	0.3026	chr5	96212095	1.0627	1.70123	0.000226024	rs1363907	0.942103	UC	chr5:96212095-96212095	not_differential	FALSE
OCR_133128	chr5	96211367	96213072	LIX1	ENSG00000145721.7	HiC_0hr_4kb:HiC_8hr_4kb:HiC_24hr_4kb	rs17087117	0.03269	chr5	96212113	4.56194	9.78617	0.00130018	rs1363907	0.690723	UC	chr5:96212113-96212113	not_differential	FALSE
OCR_133128	chr5	96211367	96213072	LIX1	ENSG00000145721.7	HiC_0hr_4kb:HiC_8hr_4kb:HiC_24hr_4kb	rs17087119	0.04028	chr5	96212637	4.20605	8.19092	0.00108824	rs1363907	0.764257	UC	chr5:96212637-96212637	not_differential	FALSE
OCR_133128	chr5	96211367	96213072	LIX1	ENSG00000145721.7	HiC_0hr_4kb:HiC_8hr_4kb:HiC_24hr_4kb	rs147529760	0.2826	chr5	96212741	1.15454	1.78117	0.000236645	rs1363907	0.938402	UC	chr5:96212741-96212741	not_differential	FALSE
OCR_133128	chr5	96211367	96213072	LIX1	ENSG00000145721.7	HiC_0hr_4kb:HiC_8hr_4kb:HiC_24hr_4kb	rs968218	0.08493	chr5	96212781	2.96794	4.41042	0.000585964	rs1363907	0.867616	UC	chr5:96212781-96212781	not_differential	FALSE
OCR_133128	chr5	96211367	96213072	LIX1	ENSG00000145721.7	HiC_0hr_4kb:HiC_8hr_4kb:HiC_24hr_4kb	rs1230360	0.06345	chr5	96212895	3.44483	5.59803	0.000743749	rs1363907	0.839169	UC	chr5:96212895-96212895	not_differential	FALSE
OCR_133128	chr5	96211367	96213072	LNPEP	ENSG00000113441.11	HiC_0hr_2kb:HiC_0hr_4kb:HiC_8hr_4kb:HiC_24hr_4kb	rs17087114	0.03471	chr5	96211730	4.45938	9.29701	0.00123519	rs1363907	0.709629	UC	chr5:96211730-96211730	4	FALSE
OCR_133128	chr5	96211367	96213072	LNPEP	ENSG00000113441.11	HiC_0hr_2kb:HiC_0hr_4kb:HiC_8hr_4kb:HiC_24hr_4kb	rs1230358	0.01042	chr5	96211741	6.56164	26.5976	0.00353374	rs1363907	0.440782	UC	chr5:96211741-96211741	4	FALSE
OCR_133128	chr5	96211367	96213072	LNPEP	ENSG00000113441.11	HiC_0hr_2kb:HiC_0hr_4kb:HiC_8hr_4kb:HiC_24hr_4kb	rs17524572	0.3026	chr5	96212095	1.0627	1.70123	0.000226024	rs1363907	0.942103	UC	chr5:96212095-96212095	4	FALSE
OCR_133128	chr5	96211367	96213072	LNPEP	ENSG00000113441.11	HiC_0hr_2kb:HiC_0hr_4kb:HiC_8hr_4kb:HiC_24hr_4kb	rs17087117	0.03269	chr5	96212113	4.56194	9.78617	0.00130018	rs1363907	0.690723	UC	chr5:96212113-96212113	4	FALSE
OCR_133128	chr5	96211367	96213072	LNPEP	ENSG00000113441.11	HiC_0hr_2kb:HiC_0hr_4kb:HiC_8hr_4kb:HiC_24hr_4kb	rs17087119	0.04028	chr5	96212637	4.20605	8.19092	0.00108824	rs1363907	0.764257	UC	chr5:96212637-96212637	4	FALSE
OCR_133128	chr5	96211367	96213072	LNPEP	ENSG00000113441.11	HiC_0hr_2kb:HiC_0hr_4kb:HiC_8hr_4kb:HiC_24hr_4kb	rs147529760	0.2826	chr5	96212741	1.15454	1.78117	0.000236645	rs1363907	0.938402	UC	chr5:96212741-96212741	4	FALSE
OCR_133128	chr5	96211367	96213072	LNPEP	ENSG00000113441.11	HiC_0hr_2kb:HiC_0hr_4kb:HiC_8hr_4kb:HiC_24hr_4kb	rs968218	0.08493	chr5	96212781	2.96794	4.41042	0.000585964	rs1363907	0.867616	UC	chr5:96212781-96212781	4	FALSE
OCR_133128	chr5	96211367	96213072	LNPEP	ENSG00000113441.11	HiC_0hr_2kb:HiC_0hr_4kb:HiC_8hr_4kb:HiC_24hr_4kb	rs1230360	0.06345	chr5	96212895	3.44483	5.59803	0.000743749	rs1363907	0.839169	UC	chr5:96212895-96212895	4	FALSE
OCR_133128	chr5	96211367	96213072	RIOK2	ENSG00000058729.6	HiC_0hr_4kb:HiC_8hr_4kb	rs17087114	0.03471	chr5	96211730	4.45938	9.29701	0.00123519	rs1363907	0.709629	UC	chr5:96211730-96211730	1	FALSE
OCR_133128	chr5	96211367	96213072	RIOK2	ENSG00000058729.6	HiC_0hr_4kb:HiC_8hr_4kb	rs1230358	0.01042	chr5	96211741	6.56164	26.5976	0.00353374	rs1363907	0.440782	UC	chr5:96211741-96211741	1	FALSE
OCR_133128	chr5	96211367	96213072	RIOK2	ENSG00000058729.6	HiC_0hr_4kb:HiC_8hr_4kb	rs17524572	0.3026	chr5	96212095	1.0627	1.70123	0.000226024	rs1363907	0.942103	UC	chr5:96212095-96212095	1	FALSE
OCR_133128	chr5	96211367	96213072	RIOK2	ENSG00000058729.6	HiC_0hr_4kb:HiC_8hr_4kb	rs17087117	0.03269	chr5	96212113	4.56194	9.78617	0.00130018	rs1363907	0.690723	UC	chr5:96212113-96212113	1	FALSE
OCR_133128	chr5	96211367	96213072	RIOK2	ENSG00000058729.6	HiC_0hr_4kb:HiC_8hr_4kb	rs17087119	0.04028	chr5	96212637	4.20605	8.19092	0.00108824	rs1363907	0.764257	UC	chr5:96212637-96212637	1	FALSE
OCR_133128	chr5	96211367	96213072	RIOK2	ENSG00000058729.6	HiC_0hr_4kb:HiC_8hr_4kb	rs147529760	0.2826	chr5	96212741	1.15454	1.78117	0.000236645	rs1363907	0.938402	UC	chr5:96212741-96212741	1	FALSE
OCR_133128	chr5	96211367	96213072	RIOK2	ENSG00000058729.6	HiC_0hr_4kb:HiC_8hr_4kb	rs968218	0.08493	chr5	96212781	2.96794	4.41042	0.000585964	rs1363907	0.867616	UC	chr5:96212781-96212781	1	FALSE
[truncated: 18,327 more rows]
