# Supplementary material for: Dynamic chromatin architecture identifies new autoimmune-associated enhancers for IL2 and novel genes regulating CD4+ T cell activation
Source: eLife. 2024 Sep 20;13:RP96852. doi: 10.7554/eLife.96852 (PMC11418197; doi:10.7554/eLife.96852)
Supplement: Supplementary file 14. [file elife-96852-supp14.xlsx]

## Sheet: SupTab_14_pldsr_output
Table S14: Partitioned LD score regression output
Category	Prop._SNPs	Prop._h2	Prop._h2_std_error	Enrichment	Enrichment_std_error	Enrichment_p	fdr	significant	cluster	gwas	z
ALG_cluster_1	0.0043762	0.152592	0.0297548	34.8686	6.79923	7.37256e-06	0.000213881	Sig	cluster_1	ALG	4.33246
ALG_cluster_2	0.00194479	0.0489008	0.0151244	25.1445	7.77687	0.00487772	0.0103467	Sig	cluster_2	ALG	2.58438
ALG_cluster_3	0.00552678	0.105206	0.0319276	19.0357	5.7769	0.00083808	0.00345092	Sig	cluster_3	ALG	3.14232
ALG_cluster_4	0.00442193	0.119052	0.0340518	26.9231	7.70067	0.00111957	0.00400513	Sig	cluster_4	ALG	3.05653
ALG_cluster_5	0.00445601	0.109808	0.0347682	24.6427	7.80253	0.00241857	0.00604643	Sig	cluster_5	ALG	2.81768
AS_cluster_1	0.0043762	0.099407	0.0963982	22.7154	22.0278	0.272775	0.303083	NS	cluster_1	AS	0.604442
AS_cluster_2	0.00194479	0.0792593	0.0660531	40.7546	33.9641	0.227217	0.26074	NS	cluster_2	AS	0.748045
AS_cluster_3	0.00552678	0.391779	0.267815	70.8874	48.4577	0.0568674	0.0780533	NS	cluster_3	AS	1.58163
AS_cluster_4	0.00442193	0.10716	0.124586	24.2337	28.1746	0.376687	0.412001	NS	cluster_4	AS	0.314194
AS_cluster_5	0.00445601	0.0778953	0.144429	17.4809	32.4123	0.611118	0.630326	NS	cluster_5	AS	-0.282235
CEL_cluster_1	0.0043762	0.215145	0.053299	49.1624	12.1793	4.8512e-05	0.00048512	Sig	cluster_1	CEL	3.89792
CEL_cluster_2	0.00194479	0.0577596	0.0276355	29.6996	14.21	0.0403032	0.060026	nominal	cluster_2	CEL	1.74718
CEL_cluster_3	0.00552678	0.174285	0.0536201	31.5347	9.70188	0.000604871	0.003257	Sig	cluster_3	CEL	3.23657
CEL_cluster_4	0.00442193	0.170295	0.0580354	38.5114	13.1245	0.00188887	0.00528883	Sig	cluster_4	CEL	2.89615
CEL_cluster_5	0.00445601	0.147988	0.0444356	33.2109	9.97206	0.000709898	0.00331286	Sig	cluster_5	CEL	3.1906
CRO_cluster_1	0.0043762	0.18642	0.0374936	42.5986	8.56761	9.16634e-06	0.000213881	Sig	cluster_1	CRO	4.28429
CRO_cluster_2	0.00194479	0.0387022	0.0219479	19.9004	11.2855	0.095391	0.121407	NS	cluster_2	CRO	1.30827
CRO_cluster_3	0.00552678	0.154358	0.0343018	27.9291	6.20646	1.74532e-05	0.000257705	Sig	cluster_3	CRO	4.13884
CRO_cluster_4	0.00442193	0.0839613	0.0282379	18.9875	6.38588	0.0053794	0.0107588	Sig	cluster_4	CRO	2.55044
CRO_cluster_5	0.00445601	0.0845899	0.0292705	18.9833	6.56877	0.00890479	0.0173149	Sig	cluster_5	CRO	2.36955
ECZ_cluster_1	0.0043762	0.217918	0.0689812	49.7961	15.7628	0.000653975	0.00326988	Sig	cluster_1	ECZ	3.21423
ECZ_cluster_2	0.00194479	0.064387	0.0440177	33.1074	22.6336	0.166902	0.19802	NS	cluster_2	ECZ	0.966479
ECZ_cluster_3	0.00552678	0.185463	0.0783748	33.5571	14.1809	0.0159149	0.0288409	Sig	cluster_3	ECZ	2.14654
ECZ_cluster_4	0.00442193	0.207884	0.0638982	47.0121	14.4503	0.00142885	0.00434867	Sig	cluster_4	ECZ	2.98264
ECZ_cluster_5	0.00445601	0.263012	0.06833	59.024	15.3343	0.00010895	0.000847385	Sig	cluster_5	ECZ	3.69731
IBD_cluster_1	0.0043762	0.160938	0.0342739	36.7757	7.83188	1.84075e-05	0.000257705	Sig	cluster_1	IBD	4.12661
IBD_cluster_2	0.00194479	0.0555147	0.0232382	28.5453	11.9489	0.0240098	0.0390857	Sig	cluster_2	IBD	1.97719
IBD_cluster_3	0.00552678	0.155846	0.0352816	28.1984	6.38375	3.75683e-05	0.000438297	Sig	cluster_3	IBD	3.95941
IBD_cluster_4	0.00442193	0.101545	0.0289925	22.9639	6.55652	0.000956294	0.00371892	Sig	cluster_4	IBD	3.10348
IBD_cluster_5	0.00445601	0.0791496	0.0260945	17.7624	5.85603	0.00533891	0.0107588	Sig	cluster_5	IBD	2.55307
JIA_cluster_1	0.0043762	0.169874	0.18589	38.8178	42.4774	0.254045	0.286825	NS	cluster_1	JIA	0.661814
JIA_cluster_2	0.00194479	0.0433103	0.0933531	22.2699	48.0016	0.631254	0.640403	NS	cluster_2	JIA	-0.335177
JIA_cluster_3	0.00552678	0.411112	0.34076	74.3854	61.6562	0.0735051	0.0952844	NS	cluster_3	JIA	1.45017
JIA_cluster_4	0.00442193	0.233391	0.216614	52.7803	48.9862	0.15134	0.185856	NS	cluster_4	JIA	1.0307
JIA_cluster_5	0.00445601	0.0546842	0.167494	12.272	37.5883	0.751307	0.751307	NS	cluster_5	JIA	-0.678608
MS_cluster_1	0.0043762	0.175392	0.0556601	40.0786	12.7188	0.00212178	0.00550091	Sig	cluster_1	MS	2.85947
MS_cluster_2	0.00194479	0.030104	0.0397328	15.4793	20.4303	0.472433	0.508774	NS	cluster_2	MS	0.0691561
MS_cluster_3	0.00552678	0.330526	0.107368	59.8045	19.4269	0.000381753	0.00228457	Sig	cluster_3	MS	3.3657
MS_cluster_4	0.00442193	0.141618	0.0698492	32.0263	15.7961	0.0239513	0.0390857	Sig	cluster_4	MS	1.97823
MS_cluster_5	0.00445601	0.220027	0.104446	49.3776	23.4394	0.0246612	0.0392337	Sig	cluster_5	MS	1.96579
PSO_cluster_1	0.0043762	0.137371	0.0704198	31.3904	16.0915	0.0397249	0.060026	nominal	cluster_1	PSO	1.75389
PSO_cluster_2	0.00194479	0.0187825	0.0341565	9.65782	17.563	0.612316	0.630326	NS	cluster_2	PSO	-0.285362
PSO_cluster_3	0.00552678	0.231154	0.135021	41.8243	24.4303	0.0160685	0.0288409	Sig	cluster_3	PSO	2.1427
PSO_cluster_4	0.00442193	0.112107	0.0704028	25.3525	15.9213	0.0675756	0.0909672	NS	cluster_4	PSO	1.49409
PSO_cluster_5	0.00445601	0.0884033	0.0722642	19.8391	16.2172	0.156067	0.188357	NS	cluster_5	PSO	1.01075
RA_cluster_1	0.0043762	0.15411	0.0380144	35.2155	8.68661	9.336e-05	0.0008169	Sig	cluster_1	RA	3.73634
RA_cluster_2	0.00194479	0.0398488	0.0227499	20.49	11.6978	0.0985255	0.123157	NS	cluster_2	RA	1.29
RA_cluster_3	0.00552678	0.152648	0.0401282	27.6198	7.26068	0.000266742	0.0018672	Sig	cluster_3	RA	3.46335
RA_cluster_4	0.00442193	0.136772	0.036716	30.9305	8.30316	0.000391641	0.00228457	Sig	cluster_4	RA	3.35864
RA_cluster_5	0.00445601	0.0700411	0.0285626	15.7183	6.40989	0.0213447	0.0364422	Sig	cluster_5	RA	2.02674
SLE_cluster_1	0.0043762	0.109268	0.05569	24.9688	12.7256	0.0128563	0.0243227	Sig	cluster_1	SLE	2.23053
SLE_cluster_2	0.00194479	0.0535716	0.0304487	27.5462	15.6565	0.047281	0.0689514	nominal	cluster_2	SLE	1.67181
SLE_cluster_3	0.00552678	0.169273	0.0678462	30.6278	12.2759	0.00342152	0.00781612	Sig	cluster_3	SLE	2.70439
SLE_cluster_4	0.00442193	0.0492762	0.0352455	11.1436	7.97061	0.19793	0.230919	NS	cluster_4	SLE	0.849037
SLE_cluster_5	0.00445601	0.117576	0.0392487	26.3858	8.80802	0.00427205	0.0093451	Sig	cluster_5	SLE	2.62978
T1D_cluster_1	0.0043762	0.230995	0.0668147	52.7842	15.2677	0.000818089	0.00345092	Sig	cluster_1	T1D	3.14938
T1D_cluster_2	0.00194479	0.0499918	0.0263165	25.7055	13.5318	0.0696406	0.0919782	NS	cluster_2	T1D	1.47847
T1D_cluster_3	0.00552678	0.241504	0.0745753	43.697	13.4935	0.00196864	0.00530018	Sig	cluster_3	T1D	2.88314
T1D_cluster_4	0.00442193	0.109117	0.0372721	24.6764	8.42892	0.00346142	0.00781612	Sig	cluster_4	T1D	2.70053
T1D_cluster_5	0.00445601	0.149399	0.074827	33.5276	16.7924	0.0498641	0.0700495	nominal	cluster_5	T1D	1.64617
UC_cluster_1	0.0043762	0.140405	0.0293637	32.0837	6.70985	5.29097e-06	0.000213881	Sig	cluster_1	UC	4.40493
UC_cluster_2	0.00194479	0.0538669	0.0211254	27.698	10.8625	0.0194804	0.0340907	Sig	cluster_2	UC	2.0646
UC_cluster_3	0.00552678	0.103636	0.0290273	18.7516	5.25212	0.00125876	0.00400513	Sig	cluster_3	UC	3.02123
UC_cluster_4	0.00442193	0.0865378	0.0253784	19.5702	5.73922	0.00115994	0.00400513	Sig	cluster_4	UC	3.0459
UC_cluster_5	0.00445601	0.0897241	0.024663	20.1355	5.53476	0.00125621	0.00400513	Sig	cluster_5	UC	3.02184
VIT_cluster_1	0.0043762	0.211737	0.0671435	48.3837	15.3429	0.00151374	0.00441507	Sig	cluster_1	VIT	2.96493
VIT_cluster_2	0.00194479	0.0203943	0.0274242	10.4866	14.1014	0.499845	0.530138	NS	cluster_2	VIT	0.000389188
VIT_cluster_3	0.00552678	0.121307	0.0558746	21.9489	10.1098	0.0369325	0.0574506	nominal	cluster_3	VIT	1.78745
VIT_cluster_4	0.00442193	0.122573	0.0394445	27.7195	8.9202	0.00297355	0.00717754	Sig	cluster_4	VIT	2.75068
VIT_cluster_5	0.00445601	0.0998173	0.0496292	22.4006	11.1376	0.0500353	0.0700495	NS	cluster_5	VIT	1.64451
