# Supplementary material for: Dynamic chromatin architecture identifies new autoimmune-associated enhancers for IL2 and novel genes regulating CD4+ T cell activation
Source: eLife. 2024 Sep 20;13:RP96852. doi: 10.7554/eLife.96852 (PMC11418197; doi:10.7554/eLife.96852)
Supplement: Supplementary file 15. [file elife-96852-supp15.xlsx]

## Sheet: v2g_credset95_promoter_ocrs
Table S15: Autoimmune variants in promoter OCR
chr	start	end	id	gene_name	strand	gene_id	rsid	pvalue	pos	z2	BF	pp	sentinel	pp_cumsum	gwas
chr1	1167049	1168094	OCR_54	B3GALT6	+	ENSG00000176022.3	rs112603604	6.89012e-06	1167090	20.2235	24630.8	0.00139511	rs11590283	0.910887	SLE
chr1	1167049	1168094	OCR_54	B3GALT6	+	ENSG00000176022.3	rs190796582	3.5616e-06	1167796	21.4874	46337.3	0.0026246	rs11590283	0.845567	SLE
chr1	1167049	1168094	OCR_54	SDF4	-	ENSG00000078808.12	rs112603604	6.89012e-06	1167090	20.2235	24630.8	0.00139511	rs11590283	0.910887	SLE
chr1	1167049	1168094	OCR_54	SDF4	-	ENSG00000078808.12	rs190796582	3.5616e-06	1167796	21.4874	46337.3	0.0026246	rs11590283	0.845567	SLE
chr1	1185961	1186908	OCR_58	RP5-902P8.12	-	ENSG00000260179.1	rs6603785	9.88279e-06	1186502	19.5339	17447.9	0.000988265	rs11590283	0.924946	SLE
chr1	1243150	1244464	OCR_66	PUSL1	+	ENSG00000169972.7	rs139775692	2.33366e-06	1243558	22.2987	69518.2	0.00393759	rs11590283	0.772635	SLE
chr1	1243150	1244464	OCR_66	PUSL1	+	ENSG00000169972.7	rs61766198	4.82265e-07	1243896	25.3335	317026	0.0179567	rs11590283	0.133717	SLE
chr1	1243150	1244464	OCR_66	ACAP3	-	ENSG00000131584.14	rs139775692	2.33366e-06	1243558	22.2987	69518.2	0.00393759	rs11590283	0.772635	SLE
chr1	1243150	1244464	OCR_66	ACAP3	-	ENSG00000131584.14	rs61766198	4.82265e-07	1243896	25.3335	317026	0.0179567	rs11590283	0.133717	SLE
chr1	1310016	1311203	OCR_77	AURKAIP1	-	ENSG00000175756.9	rs2649593	1.44509e-06	1311022	23.2197	110178	0.0062406	rs11590283	0.645494	SLE
chr1	1341814	1343445	OCR_79	RN7SL657P	-	ENSG00000264293.1	rs2275915	1.01617e-05	1342612	19.4808	16990.2	0.000962342	rs11590283	0.925908	SLE
chr1	1341814	1343445	OCR_79	RN7SL657P	-	ENSG00000264293.1	rs34442823	1.83705e-06	1342945	22.7583	87480.5	0.00495499	rs11590283	0.707136	SLE
chr1	1341814	1343445	OCR_79	MRPL20	-	ENSG00000242485.1	rs2275915	1.01617e-05	1342612	19.4808	16990.2	0.000962342	rs11590283	0.925908	SLE
chr1	1341814	1343445	OCR_79	MRPL20	-	ENSG00000242485.1	rs34442823	1.83705e-06	1342945	22.7583	87480.5	0.00495499	rs11590283	0.707136	SLE
chr1	1341814	1343445	OCR_79	RP4-758J18.13	+	ENSG00000272455.1	rs2275915	1.01617e-05	1342612	19.4808	16990.2	0.000962342	rs11590283	0.925908	SLE
chr1	1341814	1343445	OCR_79	RP4-758J18.13	+	ENSG00000272455.1	rs34442823	1.83705e-06	1342945	22.7583	87480.5	0.00495499	rs11590283	0.707136	SLE
chr1	2477481	2478878	OCR_173	RP3-395M20.12	+	ENSG00000272449.1	rs2477678	1.673e-07	2478511	27.3783	881287	0.00586555	rs10797432	0.924192	IBD
chr1	2477481	2478878	OCR_173	RP3-395M20.12	+	ENSG00000272449.1	rs2477678	2.382e-11	2478511	44.6285	4.90856e+09	0.00881368	rs10797432	0.878973	UC
chr1	2486962	2488800	OCR_177	RP3-395M20.8	-	ENSG00000238164.2	rs2227312	2.096e-11	2487663	44.8789	5.56337e+09	0.00998945	rs10797432	0.870159	UC
chr1	2486962	2488800	OCR_177	RP3-395M20.8	-	ENSG00000238164.2	rs2227313	4.653e-11	2487766	43.3179	2.549e+09	0.00457691	rs10797432	0.951803	UC
chr1	2486962	2488800	OCR_177	RP3-395M20.8	-	ENSG00000238164.2	rs4870	2.131e-07	2488153	26.9105	697488	0.00464225	rs10797432	0.944842	IBD
chr1	2486962	2488800	OCR_177	RP3-395M20.8	-	ENSG00000238164.2	rs4870	6.432e-12	2488153	47.1933	1.76968e+10	0.0317759	rs10797432	0.791352	UC
chr1	2486962	2488800	OCR_177	RP3-395M20.8	-	ENSG00000238164.2	rs1886730	1.544e-07	2488608	27.5335	952391	0.00633879	rs10797432	0.912039	IBD
chr1	2486962	2488800	OCR_177	RP3-395M20.8	-	ENSG00000238164.2	rs1886730	2.08e-11	2488608	44.8939	5.60527e+09	0.0100647	rs10797432	0.86017	UC
chr1	2486962	2488800	OCR_177	TNFRSF14	+	ENSG00000157873.13	rs2227312	2.096e-11	2487663	44.8789	5.56337e+09	0.00998945	rs10797432	0.870159	UC
chr1	2486962	2488800	OCR_177	TNFRSF14	+	ENSG00000157873.13	rs2227313	4.653e-11	2487766	43.3179	2.549e+09	0.00457691	rs10797432	0.951803	UC
chr1	2486962	2488800	OCR_177	TNFRSF14	+	ENSG00000157873.13	rs4870	2.131e-07	2488153	26.9105	697488	0.00464225	rs10797432	0.944842	IBD
chr1	2486962	2488800	OCR_177	TNFRSF14	+	ENSG00000157873.13	rs4870	6.432e-12	2488153	47.1933	1.76968e+10	0.0317759	rs10797432	0.791352	UC
chr1	2486962	2488800	OCR_177	TNFRSF14	+	ENSG00000157873.13	rs1886730	1.544e-07	2488608	27.5335	952391	0.00633879	rs10797432	0.912039	IBD
chr1	2486962	2488800	OCR_177	TNFRSF14	+	ENSG00000157873.13	rs1886730	2.08e-11	2488608	44.8939	5.60527e+09	0.0100647	rs10797432	0.86017	UC
chr1	2524198	2524623	OCR_185	MMEL1	-	ENSG00000142606.11	rs745368	5.39e-11	2524205	43.0302	2.2075e+09	0.00374629	rs3748817	0.928159	MS
chr1	7887214	7887759	OCR_352	RP3-467L1.4	-	ENSG00000236266.1	rs2859387	0.005	7887248	7.87944	51.4042	0.0031538	rs227163	0.703693	RA
chr1	7887214	7887759	OCR_352	RP3-467L1.4	-	ENSG00000236266.1	rs35733104	0.1	7887404	2.70554	3.86813	0.000237322	rs227163	0.948074	RA
chr1	8002300	8002801	OCR_362	TNFRSF9	-	ENSG00000049249.4	chr1:8002510	0.023	8002510	5.16851	13.2534	0.000813136	rs227163	0.88532	RA
chr1	8021141	8022527	OCR_366	PARK7	+	ENSG00000116288.8	rs17523802	0.048	8021740	3.90999	7.06387	0.00043339	rs227163	0.92698	RA
chr1	8021141	8022527	OCR_366	PARK7	+	ENSG00000116288.8	rs17523802	4.692e-09	8021740	34.3132	2.82492e+07	0.0113964	rs3766606	0.904725	UC
chr1	8021141	8022527	OCR_366	PARK7	+	ENSG00000116288.8	rs35675666	0.048	8021973	3.90999	7.06387	0.00043339	rs227163	0.927414	RA
chr1	8021141	8022527	OCR_366	PARK7	+	ENSG00000116288.8	rs3766606	2.784e-06	8022197	21.9599	58687	0.00415215	rs3766606	0.950216	CRO
chr1	8021141	8022527	OCR_366	PARK7	+	ENSG00000116288.8	rs3766606	0.048	8022197	3.90999	7.06387	0.00043339	rs227163	0.927847	RA
chr1	8021141	8022527	OCR_366	PARK7	+	ENSG00000116288.8	rs3766606	3.941e-09	8022197	34.6527	3.34757e+07	0.0135048	rs3766606	0.881026	UC
chr1	8042266	8042828	OCR_369	Y_RNA	-	ENSG00000200344.1	rs161800	1.953e-06	8042402	22.6407	82484.5	0.00583584	rs3766606	0.931118	CRO
chr1	8042266	8042828	OCR_369	Y_RNA	-	ENSG00000200344.1	rs161800	0.0083	8042402	6.96757	32.5829	0.00199906	rs227163	0.805737	RA
chr1	8042266	8042828	OCR_369	Y_RNA	-	ENSG00000200344.1	rs161800	2.462e-09	8042402	35.5688	5.29256e+07	0.0213514	rs3766606	0.753831	UC
chr1	8042266	8042828	OCR_369	Y_RNA	-	ENSG00000200344.1	rs161802	1.165e-06	8042826	23.6342	135549	0.00959018	rs3766606	0.905209	CRO
chr1	8042266	8042828	OCR_369	Y_RNA	-	ENSG00000200344.1	rs161802	6.673e-13	8042826	51.6382	1.63341e+11	0.0119724	rs3766606	0.891313	IBD
chr1	8042266	8042828	OCR_369	Y_RNA	-	ENSG00000200344.1	rs161802	0.0085	8042826	6.92498	31.8963	0.00195694	rs227163	0.807694	RA
chr1	8042266	8042828	OCR_369	Y_RNA	-	ENSG00000200344.1	rs161802	2.387e-09	8042826	35.6291	5.45446e+07	0.0220045	rs3766606	0.688667	UC
chr1	8483399	8484968	OCR_396	RERE	-	ENSG00000142599.13	rs301807	2.406e-16	8484823	67.2383	398658816969153	0.123047	rs301806	0.501693	ALG
chr1	8483399	8484968	OCR_396	RERE	-	ENSG00000142599.13	rs301807	1.84e-12	8484823	49.6475	6.03709e+10	0.142664	rs301807	0.462569	VIT
chr1	8483399	8484968	OCR_396	RP5-1115A15.1	+	ENSG00000232912.1	rs301807	2.406e-16	8484823	67.2383	398658816969153	0.123047	rs301806	0.501693	ALG
chr1	8483399	8484968	OCR_396	RP5-1115A15.1	+	ENSG00000232912.1	rs301807	1.84e-12	8484823	49.6475	6.03709e+10	0.142664	rs301807	0.462569	VIT
chr1	25255379	25257247	OCR_1376	RUNX3	-	ENSG00000020633.14	rs71514255	2.626e-09	25256444	35.4432	4.97037e+07	0.0384879	rs760805	0.771576	ALG
chr1	38259090	38260511	OCR_2190	MANEAL	+	ENSG00000185090.10	rs2306627	5.1e-11	38260503	43.1385	2.33022e+09	0.0401595	rs28411352	0.578868	RA
chr1	150336045	150337577	OCR_9061	RPRD2	+	ENSG00000163125.11	rs696616	0.0009661	150336173	10.8914	231.763	0.00117919	rs7512552	0.910626	ALG
chr1	151735284	151736580	OCR_9167	MRPL9	-	ENSG00000143436.6	rs74905404	8.455e-05	151735441	15.4537	2268.48	0.00302705	rs4845604	0.928818	CRO
chr1	151735284	151736580	OCR_9167	OAZ3	+	ENSG00000143450.10	rs74905404	8.455e-05	151735441	15.4537	2268.48	0.00302705	rs4845604	0.928818	CRO
chr1	155099102	155100485	OCR_9424	EFNA1	+	ENSG00000169242.7	rs111455542	0.000393169	155099947	12.5644	534.959	0.00596481	rs41264285	0.841732	SLE
chr1	155099102	155100485	OCR_9424	EFNA1	+	ENSG00000169242.7	rs73001391	0.00120936	155099963	10.476	188.292	0.00209946	rs41264285	0.944617	SLE
chr1	157670582	157670871	OCR_9636	FCRL3	-	ENSG00000160856.16	rs7528684	4.4e-08	157670816	29.9646	3.21171e+06	0.0770176	rs2317230	0.573167	RA
chr1	160832248	160832843	OCR_9880	CD244	-	ENSG00000122223.8	rs12036607	3.476e-07	160832646	25.9654	434815	0.00563158	rs4656958	0.825146	CRO
chr1	160832248	160832843	OCR_9880	CD244	-	ENSG00000122223.8	rs12036607	2.297e-07	160832646	26.7655	648721	0.00177371	rs4656958	0.935532	IBD
chr1	160832248	160832843	OCR_9880	CD244	-	ENSG00000122223.8	rs12037395	1.535e-07	160832777	27.5448	957790	0.012405	rs4656958	0.550751	CRO
chr1	160832248	160832843	OCR_9880	CD244	-	ENSG00000122223.8	rs12037395	1.979e-07	160832777	27.0535	749197	0.00204843	rs4656958	0.917152	IBD
chr1	160832248	160832843	OCR_9880	CD244	-	ENSG00000122223.8	rs7410867	1.477e-07	160832799	27.6193	994142	0.0128758	rs4656958	0.538346	CRO
chr1	160832248	160832843	OCR_9880	CD244	-	ENSG00000122223.8	rs7410867	1.643e-07	160832799	27.4133	896842	0.00245211	rs4656958	0.90642	IBD
chr1	160921025	160921531	OCR_9884	ITLN2	-	ENSG00000158764.6	rs4656971	0.0001758	160921230	14.0735	1137.7	0.00214237	rs4656958	0.908287	UC
chr1	160921025	160921531	OCR_9884	ITLN2	-	ENSG00000158764.6	rs4656972	0.0001723	160921360	14.1114	1159.43	0.00218328	rs4656958	0.906145	UC
chr1	161184881	161185127	OCR_9923	FCER1G	+	ENSG00000158869.6	rs2070901	1.566e-07	161185058	27.5061	939449	0.707962	rs2070901	0.707962	ALG
chr1	161493384	161495077	OCR_9946	HSPA6	+	ENSG00000173110.6	rs11811241	9.49622e-09	161493580	32.9417	1.42301e+07	0.285001	rs12129787	0.285001	SLE
chr1	172875802	172876943	OCR_10677	RP3-471M13.2	+	ENSG00000224000.1	rs16845082	0.8332	172876363	0.044352	1.02242	0.000715046	rs7517810	0.945578	UC
chr1	192537274	192537521	OCR_12340	RP5-1011O1.2	-	ENSG00000232498.1	rs1323296	6.39e-13	192537508	51.7233	1.7044e+11	0.0533927	rs1359062	0.716825	MS
chr1	192544437	192545015	OCR_12343	RGS1	+	ENSG00000090104.7	rs2984920	5.12e-13	192544795	52.1584	2.11859e+11	0.0663679	rs1359062	0.599397	MS
chr1	206943797	206944212	OCR_14002	IL10	-	ENSG00000136634.5	rs3024493	3.511e-14	206943968	57.4251	2.94917e+12	0.164703	rs3024505	0.998931	CRO
chr1	206943797	206944212	OCR_14002	IL10	-	ENSG00000136634.5	rs3024493	4.041e-31	206943968	134.599	1.68951e+29	0.381576	rs3024505	0.381576	IBD
chr1	206943797	206944212	OCR_14002	IL10	-	ENSG00000136634.5	rs3024493	7.91271e-10	206943968	37.7815	1.60014e+08	0.056809	rs3122605	0.895695	SLE
chr1	206943797	206944212	OCR_14002	IL10	-	ENSG00000136634.5	rs3024493	1.18175e-07	206943968	28.0508	1.23351e+06	0.174884	rs3024505	0.704775	T1D
chr1	206943797	206944212	OCR_14002	IL10	-	ENSG00000136634.5	rs3024493	7.458e-24	206943968	101.415	1.05217e+22	0.382318	rs3024505	0.382318	UC
chr1	209978993	209980091	OCR_14204	IRF6	-	ENSG00000117595.6	rs12403599	2.128e-06	209979014	22.4759	75958	0.0323986	rs59043219	0.854172	CRO
chr1	209978993	209980091	OCR_14204	IRF6	-	ENSG00000117595.6	rs12403599	3.565e-08	209979014	30.3728	3.93877e+06	0.0312285	rs59043219	0.770997	IBD
chr1	209978993	209980091	OCR_14204	IRF6	-	ENSG00000117595.6	rs12403006	9.088e-06	209979518	19.6941	18902.8	0.00824822	rs59043219	0.912834	UC
chr1	209978993	209980091	OCR_14204	IRF6	-	ENSG00000117595.6	rs34743335	8.949e-06	209979529	19.7236	19183.3	0.00837059	rs59043219	0.904586	UC
chr1	210000670	210001887	OCR_14207	DIEXF	+	ENSG00000117597.13	rs12404886	3.997e-06	210001543	21.2663	41487.3	0.0181029	rs59043219	0.711879	UC
chr10	6150509	6150762	OCR_17132	RBM17	+	ENSG00000134453.11	rs73605992	0.004552	6150562	8.04935	55.9621	0.00524316	rs7909519	0.820975	JIA
chr10	6150509	6150762	OCR_17132	RBM17	+	ENSG00000134453.11	rs73605992	0.004552	6150562	8.04935	55.9621	0.00522052	rs2476491	0.817431	JIA
chr10	6187655	6187827	OCR_17141	PFKFB3	+	ENSG00000170525.14	rs71499653	0.007226	6187807	7.21591	36.8906	0.00345633	rs7909519	0.867215	JIA
chr10	6187655	6187827	OCR_17141	PFKFB3	+	ENSG00000170525.14	rs71499653	0.007226	6187807	7.21591	36.8906	0.00344141	rs2476491	0.86347	JIA
chr10	6193042	6193879	OCR_17143	MIR3155A	+	ENSG00000263628.1	rs61839728	0.0219	6193399	5.25371	13.8302	0.00129018	rs2476491	0.935913	JIA
chr10	8095334	8096175	OCR_17336	GATA3-AS1	-	ENSG00000197308.4	rs2275806	1.1e-07	8095340	28.1895	1.32212e+06	0.0822729	rs3824660	0.536515	RA
chr10	8095334	8096175	OCR_17336	GATA3	+	ENSG00000107485.11	rs2275806	1.1e-07	8095340	28.1895	1.32212e+06	0.0822729	rs3824660	0.536515	RA
chr10	8095334	8096175	OCR_17336	RP11-379F12.3	-	ENSG00000243350.1	rs2275806	1.1e-07	8095340	28.1895	1.32212e+06	0.0822729	rs3824660	0.536515	RA
chr10	30722088	30723879	OCR_18924	MAP3K8	+	ENSG00000107968.5	rs306587	1.512e-10	30722908	41.0133	8.05223e+08	0.00976762	rs1042058	0.830848	CRO
chr10	30722088	30723879	OCR_18924	MAP3K8	+	ENSG00000107968.5	rs306589	4.217e-10	30723831	39.0097	2.95702e+08	0.00358696	rs1042058	0.924119	CRO
chr10	30722088	30723879	OCR_18924	MAP3K8	+	ENSG00000107968.5	rs306588	4.438e-10	30723593	38.91	2.8132e+08	0.0034125	rs1042058	0.93468	CRO
chr10	30722088	30723879	OCR_18924	MAP3K8	+	ENSG00000107968.5	rs306587	1.249e-12	30722908	50.4078	8.82884e+10	0.0343337	rs1042058	0.139683	IBD
chr10	30722088	30723879	OCR_18924	MAP3K8	+	ENSG00000107968.5	rs306589	2.408e-12	30723831	49.1198	4.63686e+10	0.0180319	rs1042058	0.44383	IBD
chr10	30722088	30723879	OCR_18924	MAP3K8	+	ENSG00000107968.5	rs306588	4.046e-12	30723593	48.1021	2.7876e+10	0.0108405	rs1042058	0.791092	IBD
chr10	30722088	30723879	OCR_18924	MAP3K8	+	ENSG00000107968.5	rs306587	4.648e-06	30722908	20.9771	35902.5	0.0142038	rs1042058	0.615279	UC
chr10	30722088	30723879	OCR_18924	MAP3K8	+	ENSG00000107968.5	rs306589	5.3e-06	30723831	20.7257	31661.2	0.0125259	rs1042058	0.667034	UC
chr10	35415298	35416925	OCR_19268	CREM	+	ENSG00000095794.15	rs4934730	1.698e-14	35415555	58.8542	6.02594e+12	0.00683606	rs34779708	0.572067	CRO
chr10	35415298	35416925	OCR_19268	CREM	+	ENSG00000095794.15	rs16935880	2.323e-14	35415468	58.2376	4.42719e+12	0.00502238	rs34779708	0.686013	CRO
chr10	35415298	35416925	OCR_19268	CREM	+	ENSG00000095794.15	rs12765038	3.068e-14	35416513	57.6904	3.36749e+12	0.00382021	rs34779708	0.831526	CRO
chr10	35415298	35416925	OCR_19268	CREM	+	ENSG00000095794.15	rs16935880	3.18e-12	35415468	48.5744	3.53011e+10	0.0063634	rs34779708	0.637961	IBD
chr10	35415298	35416925	OCR_19268	CREM	+	ENSG00000095794.15	rs4934730	3.244e-12	35415555	48.5353	3.4618e+10	0.00624028	rs34779708	0.656822	IBD
chr10	35415298	35416925	OCR_19268	CREM	+	ENSG00000095794.15	rs12765038	4.546e-12	35416513	47.8736	2.48669e+10	0.00448253	rs34779708	0.81783	IBD
chr10	35415298	35416925	OCR_19268	CREM	+	ENSG00000095794.15	rs16935880	0.0002598	35415468	13.34	788.408	0.00439605	rs34779708	0.482238	UC
chr10	35415298	35416925	OCR_19268	CREM	+	ENSG00000095794.15	rs4934730	0.0003242	35415555	12.9251	640.703	0.00357246	rs34779708	0.661105	UC
chr10	35415298	35416925	OCR_19268	CREM	+	ENSG00000095794.15	rs12765038	0.00033	35416513	12.8919	630.158	0.00351367	rs34779708	0.682372	UC
chr10	35415298	35416925	OCR_19268	RP11-297A16.2	-	ENSG00000230534.2	rs4934730	1.698e-14	35415555	58.8542	6.02594e+12	0.00683606	rs34779708	0.572067	CRO
chr10	35415298	35416925	OCR_19268	RP11-297A16.2	-	ENSG00000230534.2	rs16935880	2.323e-14	35415468	58.2376	4.42719e+12	0.00502238	rs34779708	0.686013	CRO
chr10	35415298	35416925	OCR_19268	RP11-297A16.2	-	ENSG00000230534.2	rs12765038	3.068e-14	35416513	57.6904	3.36749e+12	0.00382021	rs34779708	0.831526	CRO
chr10	35415298	35416925	OCR_19268	RP11-297A16.2	-	ENSG00000230534.2	rs16935880	3.18e-12	35415468	48.5744	3.53011e+10	0.0063634	rs34779708	0.637961	IBD
chr10	35415298	35416925	OCR_19268	RP11-297A16.2	-	ENSG00000230534.2	rs4934730	3.244e-12	35415555	48.5353	3.4618e+10	0.00624028	rs34779708	0.656822	IBD
chr10	35415298	35416925	OCR_19268	RP11-297A16.2	-	ENSG00000230534.2	rs12765038	4.546e-12	35416513	47.8736	2.48669e+10	0.00448253	rs34779708	0.81783	IBD
chr10	35415298	35416925	OCR_19268	RP11-297A16.2	-	ENSG00000230534.2	rs16935880	0.0002598	35415468	13.34	788.408	0.00439605	rs34779708	0.482238	UC
chr10	35415298	35416925	OCR_19268	RP11-297A16.2	-	ENSG00000230534.2	rs4934730	0.0003242	35415555	12.9251	640.703	0.00357246	rs34779708	0.661105	UC
chr10	35415298	35416925	OCR_19268	RP11-297A16.2	-	ENSG00000230534.2	rs12765038	0.00033	35416513	12.8919	630.158	0.00351367	rs34779708	0.682372	UC
chr10	35483879	35485285	OCR_19273	CREM	+	ENSG00000095794.15	rs1057108	8.687e-15	35484949	60.1731	1.16528e+13	0.0132194	rs34779708	0.439781	CRO
chr10	35483879	35485285	OCR_19273	CREM	+	ENSG00000095794.15	rs1057108	3.033e-12	35484949	48.6672	3.6978e+10	0.00666569	rs34779708	0.579498	IBD
chr10	35483879	35485285	OCR_19273	CREM	+	ENSG00000095794.15	rs1057108	0.0002367	35484949	13.5147	860.366	0.00479728	rs34779708	0.363031	UC
chr10	50028664	50029098	OCR_19687	WDFY4	+	ENSG00000128815.13	rs12246033	3.63918e-05	50028818	17.0509	5041.37	0.012502	rs2663054	0.504585	SLE
chr10	50028664	50029098	OCR_19687	WDFY4	+	ENSG00000128815.13	rs12264889	4.30807e-05	50028842	16.7306	4295.38	0.010652	rs2663054	0.538714	SLE
chr10	64027720	64029157	OCR_20964	RTKN2	-	ENSG00000182010.6	rs1864836	1.6e-05	64028538	18.6145	11017.5	0.00207105	rs6479800	0.948912	RA
chr10	75558739	75559324	OCR_21863	ZSWIM8	+	ENSG00000214655.6	rs11000780	0.0874106	75559077	2.92143	4.30903	0.00101582	rs2688608	0.623365	SLE
chr10	75558739	75559324	OCR_21863	ZSWIM8	+	ENSG00000214655.6	rs2271271	0.199437	75558867	1.64649	2.27788	0.000536993	rs2688608	0.704652	SLE
chr10	75558739	75559324	OCR_21863	ZSWIM8	+	ENSG00000214655.6	rs529423655	0.405832	75558999	0.690978	1.41268	0.000333028	rs2688608	0.791181	SLE
chr10	75558739	75559324	OCR_21863	ZSWIM8	+	ENSG00000214655.6	rs551098394	0.812035	75559111	0.0565496	1.02868	0.000242503	rs2688608	0.917891	SLE
chr10	75560053	75561100	OCR_21864	ZSWIM8	+	ENSG00000214655.6	10:75560383	0.0641845	75560383	3.42582	5.54506	0.00130721	rs2688608	0.613409	SLE
chr10	75560053	75561100	OCR_21864	ZSWIM8	+	ENSG00000214655.6	rs569098534	0.245341	75560555	1.34964	1.96368	0.000462922	rs2688608	0.72278	SLE
chr10	75560053	75561100	OCR_21864	ZSWIM8	+	ENSG00000214655.6	rs368625457	0.287993	75560980	1.12898	1.75855	0.000414564	rs2688608	0.734496	SLE
chr10	75560053	75561100	OCR_21864	ZSWIM8	+	ENSG00000214655.6	rs148636613	0.733506	75560670	0.115917	1.05967	0.000249809	rs2688608	0.896017	SLE
chr10	75560053	75561100	OCR_21864	ZSWIM8	+	ENSG00000214655.6	rs530542206	0.752262	75560278	0.0996401	1.05108	0.000247784	rs2688608	0.89975	SLE
chr10	75560053	75561100	OCR_21864	ZSWIM8	+	ENSG00000214655.6	rs537530036	0.879191	75560649	0.0231024	1.01162	0.000238481	rs2688608	0.941901	SLE
chr10	75560053	75561100	OCR_21864	ZSWIM8-AS1	-	ENSG00000272589.1	10:75560383	0.0641845	75560383	3.42582	5.54506	0.00130721	rs2688608	0.613409	SLE
chr10	75560053	75561100	OCR_21864	ZSWIM8-AS1	-	ENSG00000272589.1	rs569098534	0.245341	75560555	1.34964	1.96368	0.000462922	rs2688608	0.72278	SLE
chr10	75560053	75561100	OCR_21864	ZSWIM8-AS1	-	ENSG00000272589.1	rs368625457	0.287993	75560980	1.12898	1.75855	0.000414564	rs2688608	0.734496	SLE
chr10	75560053	75561100	OCR_21864	ZSWIM8-AS1	-	ENSG00000272589.1	rs148636613	0.733506	75560670	0.115917	1.05967	0.000249809	rs2688608	0.896017	SLE
chr10	75560053	75561100	OCR_21864	ZSWIM8-AS1	-	ENSG00000272589.1	rs530542206	0.752262	75560278	0.0996401	1.05108	0.000247784	rs2688608	0.89975	SLE
chr10	75560053	75561100	OCR_21864	ZSWIM8-AS1	-	ENSG00000272589.1	rs537530036	0.879191	75560649	0.0231024	1.01162	0.000238481	rs2688608	0.941901	SLE
chr10	75570504	75571982	OCR_21865	NDST2	-	ENSG00000166507.12	rs35611463	0.0418325	75571204	4.14197	7.93263	0.00187005	rs2688608	0.544314	SLE
chr10	75570504	75571982	OCR_21865	NDST2	-	ENSG00000166507.12	rs12775558	0.0427171	75570868	4.10656	7.79343	0.00183724	rs2688608	0.551726	SLE
chr10	75570504	75571982	OCR_21865	NDST2	-	ENSG00000166507.12	rs570306577	0.095764	75570605	2.77471	4.00424	0.000943969	rs2688608	0.630143	SLE
chr10	75570504	75571982	OCR_21865	NDST2	-	ENSG00000166507.12	rs570545687	0.450783	75571497	0.568682	1.32889	0.000313274	rs2688608	0.809958	SLE
chr10	75570504	75571982	OCR_21865	NDST2	-	ENSG00000166507.12	rs564554844	0.591253	75571802	0.288392	1.15511	0.000272308	rs2688608	0.860781	SLE
chr10	75570504	75571982	OCR_21865	NDST2	-	ENSG00000166507.12	rs549655525	0.872273	75571943	0.0258476	1.01301	0.000238809	rs2688608	0.935935	SLE
chr10	75570504	75571982	OCR_21865	RP11-574K11.31	-	ENSG00000272916.1	rs35611463	0.0418325	75571204	4.14197	7.93263	0.00187005	rs2688608	0.544314	SLE
chr10	75570504	75571982	OCR_21865	RP11-574K11.31	-	ENSG00000272916.1	rs12775558	0.0427171	75570868	4.10656	7.79343	0.00183724	rs2688608	0.551726	SLE
chr10	75570504	75571982	OCR_21865	RP11-574K11.31	-	ENSG00000272916.1	rs570306577	0.095764	75570605	2.77471	4.00424	0.000943969	rs2688608	0.630143	SLE
chr10	75570504	75571982	OCR_21865	RP11-574K11.31	-	ENSG00000272916.1	rs570545687	0.450783	75571497	0.568682	1.32889	0.000313274	rs2688608	0.809958	SLE
chr10	75570504	75571982	OCR_21865	RP11-574K11.31	-	ENSG00000272916.1	rs564554844	0.591253	75571802	0.288392	1.15511	0.000272308	rs2688608	0.860781	SLE
chr10	75570504	75571982	OCR_21865	RP11-574K11.31	-	ENSG00000272916.1	rs549655525	0.872273	75571943	0.0258476	1.01301	0.000238809	rs2688608	0.935935	SLE
chr10	75570504	75571982	OCR_21865	RP11-574K11.5	+	ENSG00000224195.1	rs35611463	0.0418325	75571204	4.14197	7.93263	0.00187005	rs2688608	0.544314	SLE
chr10	75570504	75571982	OCR_21865	RP11-574K11.5	+	ENSG00000224195.1	rs12775558	0.0427171	75570868	4.10656	7.79343	0.00183724	rs2688608	0.551726	SLE
chr10	75570504	75571982	OCR_21865	RP11-574K11.5	+	ENSG00000224195.1	rs570306577	0.095764	75570605	2.77471	4.00424	0.000943969	rs2688608	0.630143	SLE
chr10	75570504	75571982	OCR_21865	RP11-574K11.5	+	ENSG00000224195.1	rs570545687	0.450783	75571497	0.568682	1.32889	0.000313274	rs2688608	0.809958	SLE
chr10	75570504	75571982	OCR_21865	RP11-574K11.5	+	ENSG00000224195.1	rs564554844	0.591253	75571802	0.288392	1.15511	0.000272308	rs2688608	0.860781	SLE
chr10	75570504	75571982	OCR_21865	RP11-574K11.5	+	ENSG00000224195.1	rs549655525	0.872273	75571943	0.0258476	1.01301	0.000238809	rs2688608	0.935935	SLE
chr10	75608833	75609393	OCR_21866	CAMK2G	-	ENSG00000148660.16	rs113189683	0.0607655	75608997	3.51637	5.80189	0.00136775	rs2688608	0.605369	SLE
chr10	75608833	75609393	OCR_21866	CAMK2G	-	ENSG00000148660.16	rs16930949	0.37744	75608945	0.779023	1.47626	0.000348017	rs2688608	0.780589	SLE
chr10	75608833	75609393	OCR_21866	CAMK2G	-	ENSG00000148660.16	rs532398214	0.647912	75608973	0.208543	1.1099	0.000261651	rs2688608	0.874384	SLE
chr10	75608833	75609393	OCR_21866	CAMK2G	-	ENSG00000148660.16	rs572442527	0.845391	75609281	0.038026	1.01919	0.000240267	rs2688608	0.928271	SLE
chr10	75633987	75635310	OCR_21871	CAMK2G	-	ENSG00000148660.16	rs527295252	0.43941	75634053	0.597823	1.34839	0.000317872	rs2688608	0.805544	SLE
chr10	75633987	75635310	OCR_21871	CAMK2G	-	ENSG00000148660.16	rs568058204	0.444557	75634907	0.584492	1.33943	0.000315761	rs2688608	0.807128	SLE
chr10	75633987	75635310	OCR_21871	CAMK2G	-	ENSG00000148660.16	rs530254939	0.640256	75634968	0.218408	1.11539	0.000262944	rs2688608	0.871238	SLE
chr10	75633987	75635310	OCR_21871	CAMK2G	-	ENSG00000148660.16	rs531665648	0.692001	75635119	0.156928	1.08162	0.000254984	rs2688608	0.881612	SLE
chr10	75633987	75635310	OCR_21871	CAMK2G	-	ENSG00000148660.16	rs559201147	0.842263	75634899	0.0396009	1.02	0.000240456	rs2688608	0.92731	SLE
chr10	75633987	75635310	OCR_21871	CAMK2G	-	ENSG00000148660.16	rs562773274	0.874162	75634937	0.0250824	1.01262	0.000238717	rs2688608	0.938561	SLE
chr10	75668479	75669362	OCR_21875	PLAU	+	ENSG00000122861.11	rs58048583	0.101498	75668511	2.68185	3.82257	0.000901141	rs2688608	0.635636	SLE
chr10	75668479	75669362	OCR_21875	PLAU	+	ENSG00000122861.11	rs2227552	0.288722	75669319	1.12557	1.75556	0.000413858	rs2688608	0.73491	SLE
chr10	75668479	75669362	OCR_21875	PLAU	+	ENSG00000122861.11	rs2459449	0.289183	75669013	1.12342	1.75367	0.000413414	rs2688608	0.735323	SLE
chr10	75668479	75669362	OCR_21875	PLAU	+	ENSG00000122861.11	rs201407499	0.434021	75668734	0.612039	1.35801	0.00032014	rs2688608	0.803951	SLE
chr10	75668479	75669362	OCR_21875	PLAU	+	ENSG00000122861.11	rs2227551	0.475366	75669190	0.509475	1.29012	0.000304136	rs2688608	0.821051	SLE
chr10	75668479	75669362	OCR_21875	PLAU	+	ENSG00000122861.11	10:75668787	0.48445	75668787	0.488829	1.27687	0.000301013	rs2688608	0.824375	SLE
chr10	75668479	75669362	OCR_21875	PLAU	+	ENSG00000122861.11	rs548248917	0.525374	75669182	0.403331	1.22344	0.000288416	rs2688608	0.841477	SLE
chr10	75668479	75669362	OCR_21875	PLAU	+	ENSG00000122861.11	rs145348571	0.77497	75669115	0.0817274	1.04171	0.000245575	rs2688608	0.907635	SLE
chr10	75670251	75671441	OCR_21876	PLAU	+	ENSG00000122861.11	rs1916341	0.0230113	75671162	5.16765	13.2477	0.00312305	rs2688608	0.478648	SLE
chr10	75670251	75671441	OCR_21876	PLAU	+	ENSG00000122861.11	rs371199984	0.2633	75671405	1.25132	1.86948	0.000440716	rs2688608	0.727719	SLE
chr10	75670251	75671441	OCR_21876	PLAU	+	ENSG00000122861.11	rs72816319	0.330959	75670448	0.945142	1.60411	0.000378157	rs2688608	0.754174	SLE
chr10	75670251	75671441	OCR_21876	PLAU	+	ENSG00000122861.11	rs2227580	0.341019	75671356	0.906597	1.57349	0.000370939	rs2688608	0.758668	SLE
chr10	75670251	75671441	OCR_21876	PLAU	+	ENSG00000122861.11	rs1916340	0.385424	75671398	0.75333	1.45742	0.000343574	rs2688608	0.784746	SLE
chr10	75670251	75671441	OCR_21876	PLAU	+	ENSG00000122861.11	rs2227579	0.495074	75671289	0.46548	1.26205	0.000297519	rs2688608	0.828568	SLE
chr10	75670251	75671441	OCR_21876	PLAU	+	ENSG00000122861.11	rs556245855	0.553252	75671108	0.351523	1.19215	0.000281041	rs2688608	0.850841	SLE
chr10	75670251	75671441	OCR_21876	PLAU	+	ENSG00000122861.11	rs549463604	0.589725	75670527	0.290774	1.15649	0.000272633	rs2688608	0.860508	SLE
chr10	75670251	75671441	OCR_21876	PLAU	+	ENSG00000122861.11	rs568057544	0.608374	75670568	0.262549	1.14028	0.000268812	rs2688608	0.866461	SLE
chr10	75670251	75671441	OCR_21876	PLAU	+	ENSG00000122861.11	rs78289523	0.673637	75670681	0.177377	1.09274	0.000257605	rs2688608	0.878535	SLE
chr10	75670251	75671441	OCR_21876	PLAU	+	ENSG00000122861.11	rs539278940	0.722211	75670793	0.126384	1.06523	0.00025112	rs2688608	0.894513	SLE
chr10	75670251	75671441	OCR_21876	PLAU	+	ENSG00000122861.11	rs527937347	0.813008	75670392	0.0559546	1.02837	0.000242431	rs2688608	0.919103	SLE
chr10	75670251	75671441	OCR_21876	PLAU	+	ENSG00000122861.11	rs531449884	0.813008	75670463	0.0559546	1.02837	0.000242431	rs2688608	0.919345	SLE
chr10	75670251	75671441	OCR_21876	PLAU	+	ENSG00000122861.11	rs557545378	0.874317	75670800	0.0250201	1.01259	0.00023871	rs2688608	0.9388	SLE
chr10	75681462	75682336	OCR_21878	C10orf55	-	ENSG00000222047.4	rs559872565	0.026843	75682263	4.90088	11.5935	0.00273306	rs2688608	0.502448	SLE
chr10	75681462	75682336	OCR_21878	C10orf55	-	ENSG00000222047.4	rs2688619	0.0271255	75682176	4.88281	11.4891	0.00270848	rs2688608	0.513323	SLE
chr10	75681462	75682336	OCR_21878	C10orf55	-	ENSG00000222047.4	rs193109622	0.328516	75681922	0.954739	1.61183	0.000379976	rs2688608	0.751523	SLE
chr10	75681462	75682336	OCR_21878	C10orf55	-	ENSG00000222047.4	rs575029676	0.504981	75681716	0.444453	1.24885	0.000294408	rs2688608	0.834187	SLE
chr10	75681462	75682336	OCR_21878	C10orf55	-	ENSG00000222047.4	rs538013467	0.841231	75681769	0.0401278	1.02027	0.00024052	rs2688608	0.926829	SLE
chr10	75757172	75758869	OCR_21886	VCL	+	ENSG00000035403.12	rs3812624	0.136938	75757580	2.21203	3.0223	0.000712483	rs2688608	0.660875	SLE
chr10	75757172	75758869	OCR_21886	VCL	+	ENSG00000035403.12	rs144310550	0.454413	75757288	0.559621	1.32288	0.000311858	rs2688608	0.811834	SLE
chr10	75757172	75758869	OCR_21886	VCL	+	ENSG00000035403.12	rs551523796	0.514338	75757339	0.425232	1.23691	0.000291592	rs2688608	0.83858	SLE
chr10	75757172	75758869	OCR_21886	VCL	+	ENSG00000035403.12	rs371489159	0.580784	75758279	0.304969	1.16472	0.000274575	rs2688608	0.856682	SLE
chr10	75757172	75758869	OCR_21886	VCL	+	ENSG00000035403.12	rs3812625	0.602232	75757702	0.271643	1.14548	0.000270037	rs2688608	0.864576	SLE
chr10	75757172	75758869	OCR_21886	VCL	+	ENSG00000035403.12	rs547337176	0.880391	75757862	0.0226423	1.01139	0.000238426	rs2688608	0.942855	SLE
chr10	75757172	75758869	OCR_21886	VCL	+	ENSG00000035403.12	rs559106123	0.882131	75757869	0.0219835	1.01105	0.000238348	rs2688608	0.945953	SLE
chr10	81001926	81003926	OCR_22123	ZMIZ1	+	ENSG00000108175.12	rs76109311	0.3866	81003146	0.749609	1.45471	0.000191428	rs1250550	0.935986	UC
chr10	81106974	81108228	OCR_22139	PPIF	+	ENSG00000108179.9	rs2233713	0.006793	81107135	7.3269	38.9957	0.00513153	rs1250550	0.61332	UC
chr10	81106974	81108228	OCR_22139	PPIF	+	ENSG00000108179.9	rs2233715	0.1757	81107457	1.83362	2.5013	0.000329152	rs1250550	0.899793	UC
chr10	82167458	82169102	OCR_22190	FAM213A	+	ENSG00000122378.9	rs143361357	8.006e-05	82168838	15.5569	2388.54	0.0347908	rs6586030	0.11912	UC
chr10	82213455	82215178	OCR_22198	TSPAN14	+	ENSG00000108219.10	rs74143132	0.0002891	82214821	13.1397	713.272	0.0103893	rs6586030	0.65157	UC
chr10	82213455	82215178	OCR_22198	TSPAN14	+	ENSG00000108219.10	rs77244906	0.0004002	82213568	12.5313	526.173	0.00766408	rs6586030	0.733085	UC
chr10	82213455	82215178	OCR_22198	TSPAN14	+	ENSG00000108219.10	rs116857892	0.001827	82214065	9.7157	128.747	0.0018753	rs6586030	0.899872	UC
chr10	82213455	82215178	OCR_22198	TSPAN14	+	ENSG00000108219.10	rs4934189	0.002581	82214792	9.08227	93.797	0.00136622	rs6586030	0.926084	UC
chr10	82218803	82219274	OCR_22199	TSPAN14	+	ENSG00000108219.10	rs17618331	0.0004073	82219222	12.4984	517.599	0.0075392	rs6586030	0.748222	UC
chr10	82218803	82219274	OCR_22199	TSPAN14	+	ENSG00000108219.10	rs116848392	0.00048	82218898	12.1918	444.034	0.00646767	rs6586030	0.769102	UC
chr10	101292452	101292748	OCR_23406	NKX2-3	+	ENSG00000119919.9	rs10883371	3.093e-24	101292455	103.159	2.5159e+22	0.0128258	rs4409764	0.917994	CRO
chr10	101292452	101292748	OCR_23406	NKX2-3	+	ENSG00000119919.9	rs10883373	7.406e-21	101292484	87.7557	1.13737e+19	0.0155268	rs4409764	0.932739	UC
chr10	104261698	104262897	OCR_23614	ACTR1A	-	ENSG00000138107.7	rs2296590	4.64e-05	104262628	16.5898	4003.39	0.0052056	rs10883723	0.699986	ALG
chr10	104261698	104262897	OCR_23614	SUFU	+	ENSG00000107882.7	rs2296590	4.64e-05	104262628	16.5898	4003.39	0.0052056	rs10883723	0.699986	ALG
chr10	104263426	104263869	OCR_23615	ACTR1A	-	ENSG00000138107.7	rs3818470	4.079e-05	104263675	16.8343	4523.92	0.00588244	rs10883723	0.578812	ALG
chr10	104263426	104263869	OCR_23615	SUFU	+	ENSG00000107882.7	rs3818470	4.079e-05	104263675	16.8343	4523.92	0.00588244	rs10883723	0.578812	ALG
chr10	112257118	112258473	OCR_24108	RP11-525A16.4	-	ENSG00000273143.1	rs143273538	0.02907	112258425	4.76346	10.8236	0.00269884	rs11195128	0.614938	UC
chr10	112257118	112258473	OCR_24108	RP11-525A16.4	-	ENSG00000273143.1	rs138018204	0.3703	112257609	0.802658	1.49381	0.000372476	rs11195128	0.859116	UC
chr10	112257118	112258473	OCR_24108	DUSP5	+	ENSG00000138166.5	rs143273538	0.02907	112258425	4.76346	10.8236	0.00269884	rs11195128	0.614938	UC
chr10	112257118	112258473	OCR_24108	DUSP5	+	ENSG00000138166.5	rs138018204	0.3703	112257609	0.802658	1.49381	0.000372476	rs11195128	0.859116	UC
chr10	112262801	112263296	OCR_24109	DUSP5	+	ENSG00000138166.5	rs41291906	0.09475	112263079	2.79176	4.03853	0.00100699	rs11195128	0.734932	UC
chr10	112262801	112263296	OCR_24109	DUSP5	+	ENSG00000138166.5	rs11594185	0.2002	112262843	1.64091	2.27154	0.000566401	rs11195128	0.817946	UC
chr10	112262801	112263296	OCR_24109	DUSP5	+	ENSG00000138166.5	rs1889568	0.2061	112263030	1.59861	2.224	0.000554546	rs11195128	0.820182	UC
chr10	115438781	115440897	OCR_24264	CASP7	+	ENSG00000165806.15	rs28411397	1.83e-07	115439530	27.2048	808083	0.0239309	rs12771452	0.854273	VIT
chr10	126432495	126433517	OCR_24847	FAM53B	-	ENSG00000189319.9	rs11245348	1.524e-06	126433498	23.1175	104687	0.0535808	rs111456533	0.192957	CRO
chr10	126432495	126433517	OCR_24847	FAM53B	-	ENSG00000189319.9	rs11245348	1.771e-08	126433498	31.7307	7.76667e+06	0.0261373	rs111456533	0.67566	IBD
chr10	126432495	126433517	OCR_24847	FAM53B	-	ENSG00000189319.9	rs11245348	2.755e-05	126433498	17.5798	6567.56	0.00845595	rs111456533	0.847436	UC
chr10	126479916	126481455	OCR_24849	RP11-12J10.3	-	ENSG00000258539.1	rs2683599	2.332e-06	126480880	22.3001	69565.7	0.0356049	rs111456533	0.542164	CRO
chr10	126479916	126481455	OCR_24849	RP11-12J10.3	-	ENSG00000258539.1	rs2277264	2.505e-06	126480233	22.1626	64946.9	0.0332409	rs111456533	0.60871	CRO
chr10	126479916	126481455	OCR_24849	RP11-12J10.3	-	ENSG00000258539.1	rs2277264	3.379e-08	126480233	30.4767	4.14889e+06	0.0139623	rs111456533	0.854621	IBD
chr10	126479916	126481455	OCR_24849	RP11-12J10.3	-	ENSG00000258539.1	rs2683599	3.693e-08	126480880	30.3043	3.80629e+06	0.0128094	rs111456533	0.880791	IBD
chr10	126479916	126481455	OCR_24849	RP11-12J10.3	-	ENSG00000258539.1	rs2277264	3.681e-05	126480233	17.0292	4986.97	0.00642089	rs111456533	0.890748	UC
chr10	126479916	126481455	OCR_24849	RP11-12J10.3	-	ENSG00000258539.1	rs2683599	4.002e-05	126480880	16.8704	4606.48	0.005931	rs111456533	0.908918	UC
chr10	126479916	126481455	OCR_24849	METTL10	-	ENSG00000203791.9	rs2683599	2.332e-06	126480880	22.3001	69565.7	0.0356049	rs111456533	0.542164	CRO
chr10	126479916	126481455	OCR_24849	METTL10	-	ENSG00000203791.9	rs2277264	2.505e-06	126480233	22.1626	64946.9	0.0332409	rs111456533	0.60871	CRO
chr10	126479916	126481455	OCR_24849	METTL10	-	ENSG00000203791.9	rs2277264	3.379e-08	126480233	30.4767	4.14889e+06	0.0139623	rs111456533	0.854621	IBD
chr10	126479916	126481455	OCR_24849	METTL10	-	ENSG00000203791.9	rs2683599	3.693e-08	126480880	30.3043	3.80629e+06	0.0128094	rs111456533	0.880791	IBD
chr10	126479916	126481455	OCR_24849	METTL10	-	ENSG00000203791.9	rs2277264	3.681e-05	126480233	17.0292	4986.97	0.00642089	rs111456533	0.890748	UC
chr10	126479916	126481455	OCR_24849	METTL10	-	ENSG00000203791.9	rs2683599	4.002e-05	126480880	16.8704	4606.48	0.005931	rs111456533	0.908918	UC
chr11	1874019	1874558	OCR_25287	LSP1	+	ENSG00000130592.9	rs907611	1.055e-06	1874072	23.8251	149123	0.0798509	rs907611	0.549142	IBD
chr11	1874019	1874558	OCR_25287	LSP1	+	ENSG00000130592.9	rs907611	1.362e-07	1874072	27.7761	1.07522e+06	0.133974	rs907611	0.133974	UC
chr11	1874019	1874558	OCR_25287	LSP1	+	ENSG00000130592.9	rs907612	2.337e-07	1874221	26.7322	637990	0.341623	rs907611	0.341623	IBD
chr11	1874019	1874558	OCR_25287	LSP1	+	ENSG00000130592.9	rs907612	2.023e-07	1874221	27.011	733442	0.0913877	rs907611	0.859221	UC
chr11	1874019	1874558	OCR_25287	LSP1	+	ENSG00000130592.9	rs907613	1.067e-06	1874292	23.8033	147509	0.0789864	rs907611	0.628128	IBD
chr11	1874019	1874558	OCR_25287	LSP1	+	ENSG00000130592.9	rs907613	1.55e-07	1874292	27.526	948825	0.118225	rs907611	0.252198	UC
chr11	35160388	35161410	OCR_27304	RP4-607I7.1	-	ENSG00000255521.1	rs12365962	0.0010767	35161288	10.6908	209.641	0.00369776	rs2732549	0.843291	SLE
chr11	35160388	35161410	OCR_27304	CD44	+	ENSG00000026508.12	rs12365962	0.0010767	35161288	10.6908	209.641	0.00369776	rs2732549	0.843291	SLE
chr11	36371738	36371990	OCR_27395	PRR5L	+	ENSG00000135362.9	rs2592555	2.89e-06	36371757	21.8882	56620.1	0.0106583	rs2592555	0.865174	ECZ
chr11	60679648	60680353	OCR_28494	TMEM109	+	ENSG00000110108.5	rs12291147	0.05652	60680219	3.63667	6.16158	0.000526975	rs11230563	0.9006	UC
chr11	60681218	60682466	OCR_28495	TMEM109	+	ENSG00000110108.5	rs2285734	0.02247	60681766	5.20902	13.5246	0.0011567	rs11230563	0.842493	UC
chr11	60681218	60682466	OCR_28495	TMEM109	+	ENSG00000110108.5	rs12294981	0.04936	60682388	3.86307	6.90009	0.000590137	rs11230563	0.894579	UC
chr11	60681218	60682466	OCR_28495	RP11-881M11.1	-	ENSG00000256944.1	rs2285734	0.02247	60681766	5.20902	13.5246	0.0011567	rs11230563	0.842493	UC
chr11	60681218	60682466	OCR_28495	RP11-881M11.1	-	ENSG00000256944.1	rs12294981	0.04936	60682388	3.86307	6.90009	0.000590137	rs11230563	0.894579	UC
chr11	60682610	60682898	OCR_28496	RP11-881M11.1	-	ENSG00000256944.1	rs150433412	0.04159	60682663	4.15181	7.97176	0.000681793	rs11230563	0.882586	UC
chr11	60691264	60693158	OCR_28498	TMEM132A	+	ENSG00000006118.10	rs12285866	0.03841	60692869	4.28677	8.52827	0.000729389	rs11230563	0.878374	UC
chr11	60691264	60693158	OCR_28498	RP11-881M11.4	-	ENSG00000256196.1	rs12285866	0.03841	60692869	4.28677	8.52827	0.000729389	rs11230563	0.878374	UC
chr11	60702341	60702533	OCR_28500	TMEM132A	+	ENSG00000006118.10	rs1010236627	0.03107	60702412	4.64909	10.222	0.00087425	rs11230563	0.868759	UC
chr11	60738873	60739458	OCR_28504	CD6	+	ENSG00000013725.10	rs113460854	0.08604	60739083	2.94695	4.36437	0.000373267	rs11230563	0.924609	UC
chr11	60753436	60754417	OCR_28511	RNU6-933P	-	ENSG00000207153.1	rs75307228	0.04792	60753768	3.91279	7.07378	0.000604992	rs11230563	0.892196	UC
chr11	60753436	60754417	OCR_28511	RNU6-933P	-	ENSG00000207153.1	rs78601160	0.0625	60753960	3.46977	5.66828	0.000484785	rs11230563	0.908281	UC
chr11	60771562	60772151	OCR_28516	CD6	+	ENSG00000013725.10	rs2237996	0.08339	60771927	2.99756	4.47623	0.000382834	rs11230563	0.922352	UC
chr11	60771562	60772151	OCR_28516	CD6	+	ENSG00000013725.10	rs3019540	0.03129	60771945	4.63698	10.1603	0.000868972	rs11230563	0.869628	UC
chr11	60771562	60772151	OCR_28516	CD6	+	ENSG00000013725.10	rs56103919	0.0003628	60771980	12.7147	576.705	0.0030184	rs11230563	0.915897	IBD
chr11	60771562	60772151	OCR_28516	CD6	+	ENSG00000013725.10	rs56103919	0.002694	60771980	9.00393	90.1941	0.00771394	rs11230563	0.66369	UC
chr11	60771562	60772151	OCR_28516	CD6	+	ENSG00000013725.10	rs2237997	0.08495	60772090	2.96756	4.40958	0.000377134	rs11230563	0.923484	UC
chr11	60772208	60772641	OCR_28517	CD6	+	ENSG00000013725.10	rs28546162	0.0004311	60772381	12.3923	490.864	0.00256912	rs11230563	0.932657	IBD
chr11	60772208	60772641	OCR_28517	CD6	+	ENSG00000013725.10	rs28546162	0.002807	60772381	8.92886	86.8714	0.00742976	rs11230563	0.678613	UC
chr11	60775622	60775910	OCR_28519	CD6	+	ENSG00000013725.10	rs12418337	0.0004867	60775627	12.1659	438.33	0.00229417	rs11230563	0.937402	IBD
chr11	60775622	60775910	OCR_28519	CD6	+	ENSG00000013725.10	rs12418337	0.003206	60775627	8.68636	76.9519	0.00658139	rs11230563	0.72745	UC
chr11	60869387	60871117	OCR_28547	CD5	+	ENSG00000110448.6	rs545230	6.1e-05	60869481	16.0713	3089.22	0.00632649	rs508970	0.909719	RA
chr11	60869387	60871117	OCR_28547	CD5	+	ENSG00000110448.6	rs545230	0.07299	60869481	3.21447	4.98899	0.000426688	rs11230563	0.918722	UC
chr11	60869387	60871117	OCR_28547	CD5	+	ENSG00000110448.6	rs546241	6.5e-05	60869612	15.9511	2908.96	0.00595733	rs508970	0.915677	RA
chr11	60869387	60871117	OCR_28547	CD5	+	ENSG00000110448.6	rs546241	0.09887	60869612	2.72368	3.90336	0.000333839	rs11230563	0.929149	UC
chr11	61559453	61560888	OCR_28595	TMEM258	-	ENSG00000134825.9	rs174538	2.754e-06	61560081	21.9807	59300.4	0.00770056	rs4246215	0.869175	CRO
chr11	61559453	61560888	OCR_28595	MIR611	-	ENSG00000207601.1	rs174538	2.754e-06	61560081	21.9807	59300.4	0.00770056	rs4246215	0.869175	CRO
chr11	61559453	61560888	OCR_28595	FEN1	+	ENSG00000168496.3	rs174538	2.754e-06	61560081	21.9807	59300.4	0.00770056	rs4246215	0.869175	CRO
chr11	61559453	61560888	OCR_28595	FADS2	+	ENSG00000134824.9	rs174538	2.754e-06	61560081	21.9807	59300.4	0.00770056	rs4246215	0.869175	CRO
chr11	61582532	61583418	OCR_28596	FADS1	-	ENSG00000149485.12	rs174561	4.91e-06	61582708	20.8721	34065.4	0.00442363	rs4246215	0.950834	CRO
chr11	61582532	61583418	OCR_28596	MIR1908	-	ENSG00000222326.1	rs174561	4.91e-06	61582708	20.8721	34065.4	0.00442363	rs4246215	0.950834	CRO
chr11	61582532	61583418	OCR_28596	FADS2	+	ENSG00000134824.9	rs174561	4.91e-06	61582708	20.8721	34065.4	0.00442363	rs4246215	0.950834	CRO
chr11	61594761	61595951	OCR_28598	FADS2	+	ENSG00000134824.9	rs3834458	1.114e-06	61594920	23.7203	141515	0.0183767	rs4246215	0.805999	CRO
chr11	61594761	61595951	OCR_28598	FADS2	+	ENSG00000134824.9	rs968567	7.3e-07	61595564	24.5343	212593	0.282035	rs968567	0.282035	RA
chr11	61594761	61595951	OCR_28598	FADS2	+	ENSG00000134824.9	rs968567	6.86e-07	61595564	24.6541	225716	0.302372	rs968567	0.302372	VIT
chr11	61596004	61596573	OCR_28599	FADS2	+	ENSG00000134824.9	rs5792235	7.237e-07	61596322	24.551	214375	0.0278381	rs4246215	0.60264	CRO
chr11	61596004	61596573	OCR_28599	FADS1	-	ENSG00000149485.12	rs5792235	7.237e-07	61596322	24.551	214375	0.0278381	rs4246215	0.60264	CRO
chr11	61658054	61659866	OCR_28603	FADS3	-	ENSG00000221968.4	rs693672	7.3e-05	61658629	15.7315	2606.41	0.00345778	rs968567	0.938155	RA
chr11	61658054	61659866	OCR_28603	FADS3	-	ENSG00000221968.4	rs174466	0.00011	61659296	14.9568	1769.42	0.0023474	rs968567	0.943831	RA
chr11	64051903	64053570	OCR_28791	GPR137	+	ENSG00000173264.9	rs2510066	8.872e-07	64052447	24.1586	176185	0.0270954	rs559928	0.603256	CRO
chr11	64051903	64053570	OCR_28791	GPR137	+	ENSG00000173264.9	rs2510066	6.67e-06	64052447	20.2856	25407.8	0.0598937	rs12421615	0.384615	VIT
chr11	64051903	64053570	OCR_28791	GPR137	+	ENSG00000173264.9	rs887314	3.055e-06	64053157	21.7817	53682.9	0.00825587	rs559928	0.855421	CRO
chr11	64051903	64053570	OCR_28791	GPR137	+	ENSG00000173264.9	rs887314	9.94e-06	64053157	19.5229	17351.9	0.0409036	rs12421615	0.697909	VIT
chr11	64051903	64053570	OCR_28791	BAD	-	ENSG00000002330.9	rs2510066	8.872e-07	64052447	24.1586	176185	0.0270954	rs559928	0.603256	CRO
chr11	64051903	64053570	OCR_28791	BAD	-	ENSG00000002330.9	rs2510066	6.67e-06	64052447	20.2856	25407.8	0.0598937	rs12421615	0.384615	VIT
chr11	64051903	64053570	OCR_28791	BAD	-	ENSG00000002330.9	rs887314	3.055e-06	64053157	21.7817	53682.9	0.00825587	rs559928	0.855421	CRO
chr11	64051903	64053570	OCR_28791	BAD	-	ENSG00000002330.9	rs887314	9.94e-06	64053157	19.5229	17351.9	0.0409036	rs12421615	0.697909	VIT
chr11	64084295	64086280	OCR_28794	TRMT112	-	ENSG00000173113.2	rs9787810	5.78e-05	64085298	16.1734	3250.95	0.141728	rs694739	0.91524	MS
chr11	64084295	64086280	OCR_28794	TRMT112	-	ENSG00000173113.2	rs9787810	0.0498884	64085298	3.84521	6.83874	0.172806	rs645078	0.699884	PSO
chr11	64084295	64086280	OCR_28794	PRDX5	+	ENSG00000126432.9	rs9787810	5.78e-05	64085298	16.1734	3250.95	0.141728	rs694739	0.91524	MS
chr11	64084295	64086280	OCR_28794	PRDX5	+	ENSG00000126432.9	rs9787810	0.0498884	64085298	3.84521	6.83874	0.172806	rs645078	0.699884	PSO
chr11	64107389	64108652	OCR_28796	CCDC88B	+	ENSG00000168071.17	rs479777	1.55e-05	64107477	18.675	11356.1	0.0267697	rs12421615	0.803027	VIT
chr11	64107389	64108652	OCR_28796	CCDC88B	+	ENSG00000168071.17	rs663743	1.61e-05	64107735	18.6026	10952.3	0.0258178	rs12421615	0.828845	VIT
chr11	64109971	64110530	OCR_28797	CCDC88B	+	ENSG00000168071.17	rs11601860	1.074e-06	64110422	23.7907	146584	0.022543	rs559928	0.625799	CRO
chr11	64109971	64110530	OCR_28797	CCDC88B	+	ENSG00000168071.17	rs11601860	1.82e-05	64110422	18.3689	9744.65	0.022971	rs12421615	0.851816	VIT
chr11	64334079	64334339	OCR_28809	SLC22A11	+	ENSG00000168065.11	rs2078267	0.00545897	64334114	7.72075	47.4832	0.000886618	rs4930194	0.888427	SLE
chr11	65553784	65554728	OCR_28949	OVOL1	+	ENSG00000172818.5	rs11227302	0.00112691	65554502	10.6065	200.989	0.00126591	rs11227302	0.938661	SLE
chr11	65600635	65601868	OCR_28955	CFL1	-	ENSG00000172757.8	rs72924752	0.000993696	65600913	10.8393	225.797	0.00142217	rs11227302	0.926573	SLE
chr11	65600635	65601868	OCR_28955	CFL1	-	ENSG00000172757.8	rs59416249	0.00192943	65601466	9.61549	122.455	0.000771276	rs11227302	0.94774	SLE
chr11	65600635	65601868	OCR_28955	SNX32	+	ENSG00000172803.13	rs72924752	0.000993696	65600913	10.8393	225.797	0.00142217	rs11227302	0.926573	SLE
chr11	65600635	65601868	OCR_28955	SNX32	+	ENSG00000172803.13	rs59416249	0.00192943	65601466	9.61549	122.455	0.000771276	rs11227302	0.94774	SLE
chr11	65624458	65624626	OCR_28958	CFL1	-	ENSG00000172757.8	rs667555	0.000314237	65624562	12.9836	659.698	0.00415507	rs11227302	0.854372	SLE
chr11	65624458	65624626	OCR_28958	MUS81	+	ENSG00000172732.7	rs667555	0.000314237	65624562	12.9836	659.698	0.00415507	rs11227302	0.854372	SLE
chr11	65625047	65625991	OCR_28959	CFL1	-	ENSG00000172757.8	rs7947929	0.000858951	65625191	11.1093	258.439	0.00162776	rs11227302	0.892237	SLE
chr11	65625047	65625991	OCR_28959	CFL1	-	ENSG00000172757.8	rs7947741	0.000907715	65625237	11.0069	245.542	0.00154653	rs11227302	0.900047	SLE
chr11	65625047	65625991	OCR_28959	CFL1	-	ENSG00000172757.8	rs117231452	0.00138418	65625464	10.2268	166.231	0.00104699	rs11227302	0.942004	SLE
chr11	65625047	65625991	OCR_28959	MUS81	+	ENSG00000172732.7	rs7947929	0.000858951	65625191	11.1093	258.439	0.00162776	rs11227302	0.892237	SLE
chr11	65625047	65625991	OCR_28959	MUS81	+	ENSG00000172732.7	rs7947741	0.000907715	65625237	11.0069	245.542	0.00154653	rs11227302	0.900047	SLE
chr11	65625047	65625991	OCR_28959	MUS81	+	ENSG00000172732.7	rs117231452	0.00138418	65625464	10.2268	166.231	0.00104699	rs11227302	0.942004	SLE
chr11	65626588	65627279	OCR_28960	CFL1	-	ENSG00000172757.8	rs1939212	0.00140975	65626701	10.193	163.449	0.00102947	rs11227302	0.943034	SLE
chr11	65626588	65627279	OCR_28960	MUS81	+	ENSG00000172732.7	rs1939212	0.00140975	65626701	10.193	163.449	0.00102947	rs11227302	0.943034	SLE
chr11	118660634	118660826	OCR_32423	DDX6	-	ENSG00000110367.7	rs149943776	5.859e-12	118660641	47.3762	1.93914e+10	0.00535552	rs12365699	0.846046	ALG
chr11	118661152	118662240	OCR_32424	DDX6	-	ENSG00000110367.7	rs57494551	5.22e-06	118661398	20.7548	32125.7	0.0359141	rs533646	0.912511	MS
chr11	118661152	118662240	OCR_32424	DDX6	-	ENSG00000110367.7	rs57494551	1.5e-13	118661398	54.5701	7.07536e+11	0.00426739	rs10790268	0.90963	RA
chr11	118662313	118663264	OCR_32425	DDX6	-	ENSG00000110367.7	rs199725450	7.263e-12	118662993	46.9551	1.57102e+10	0.00433884	rs12365699	0.883576	ALG
chr11	118754002	118754726	OCR_32436	CXCR5	+	ENSG00000160683.4	rs630923	6.545e-06	118754353	20.3218	25871.8	0.837463	rs630923	0.837463	CRO
chr11	118782608	118783584	OCR_32443	BCL9L	-	ENSG00000186174.8	rs149114341	0.0163	118783424	5.77022	17.9055	0.000579597	rs630923	0.944585	CRO
chr11	118796955	118797342	OCR_32452	BCL9L	-	ENSG00000186174.8	rs73575428	0.0009402	118797003	10.9418	237.671	0.00769335	rs630923	0.893699	CRO
chr11	118796955	118797342	OCR_32452	BCL9L	-	ENSG00000186174.8	rs76598569	0.01385	118797253	6.05716	20.6679	0.000669014	rs630923	0.940817	CRO
chr11	118796955	118797342	OCR_32452	BCL9L	-	ENSG00000186174.8	rs74584888	0.001316	118797278	10.3199	174.16	0.00563751	rs630923	0.911351	CRO
chr11	128392039	128393256	OCR_32960	ETS1	-	ENSG00000134954.10	rs151213883	6.749e-08	128392903	29.1355	2.12171e+06	0.0915463	rs11221332	0.95629	IBD
chr11	128392039	128393256	OCR_32960	ETS1	-	ENSG00000134954.10	rs151213883	7.903e-06	128392903	19.9612	21603.2	0.143165	rs11221332	0.67521	UC
chr11	128395344	128395743	OCR_32961	RP11-1007G5.2	+	ENSG00000254588.1	rs12223943	0.000151606	128395628	14.3522	1307.77	0.104461	rs3802826	0.533153	PSO
chr12	6419462	6420478	OCR_33591	PLEKHG6	+	ENSG00000008323.11	rs146647148	0.5876	6419880	0.294108	1.15842	0.000448599	rs7954567	0.916179	UC
chr12	6421823	6422451	OCR_33592	PLEKHG6	+	ENSG00000008323.11	rs113559360	0.02669	6422052	4.91075	11.6508	0.0045118	rs7954567	0.406857	UC
chr12	6421823	6422451	OCR_33592	PLEKHG6	+	ENSG00000008323.11	rs142348685	0.1649	6422435	1.92871	2.62309	0.0010158	rs7954567	0.668463	UC
chr12	6427154	6427798	OCR_33593	PLEKHG6	+	ENSG00000008323.11	rs71584815	0.1262	6427181	2.33864	3.2198	0.00124687	rs7954567	0.621841	UC
chr12	6444595	6445210	OCR_33596	TNFRSF1A	-	ENSG00000067182.3	rs147997492	0.01478	6444641	5.9425	19.5163	0.00755774	rs7954567	0.345585	UC
chr12	6444595	6445210	OCR_33596	TNFRSF1A	-	ENSG00000067182.3	rs34819705	0.5797	6444963	0.30672	1.16574	0.000451437	rs7954567	0.913479	UC
chr12	6450618	6451387	OCR_33602	TNFRSF1A	-	ENSG00000067182.3	rs767455	0.0001233	6450945	14.7415	1588.85	0.0144699	rs7954567	0.86609	IBD
chr12	6450618	6451387	OCR_33602	TNFRSF1A	-	ENSG00000067182.3	rs767455	0.01524	6450945	5.88851	18.9965	0.00735643	rs7954567	0.352942	UC
chr12	6450618	6451387	OCR_33602	TNFRSF1A	-	ENSG00000067182.3	rs4149622	0.3516	6450639	0.867674	1.54317	0.000597594	rs7954567	0.815843	UC
chr12	6450618	6451387	OCR_33602	TNFRSF1A	-	ENSG00000067182.3	rs2234649	0.3848	6451363	0.755311	1.45886	0.000564946	rs7954567	0.839695	UC
chr12	6470982	6471439	OCR_33607	SCNN1A	-	ENSG00000111319.8	rs56128666	0.5274	6471154	0.399399	1.22104	0.000472848	rs7954567	0.888591	UC
chr12	6472422	6473499	OCR_33608	SCNN1A	-	ENSG00000111319.8	rs111317117	0.07147	6472600	3.24893	5.07571	0.00196558	rs7954567	0.532457	UC
chr12	6472422	6473499	OCR_33608	SCNN1A	-	ENSG00000111319.8	rs55859427	0.3938	6472753	0.727176	1.43848	0.000557055	rs7954567	0.843623	UC
chr12	6472422	6473499	OCR_33608	SCNN1A	-	ENSG00000111319.8	rs55797039	0.4663	6472752	0.53073	1.30391	0.00050494	rs7954567	0.868632	UC
chr12	6485459	6487091	OCR_33610	SCNN1A	-	ENSG00000111319.8	rs3759324	0.1472	6485661	2.10103	2.85912	0.0011072	rs7954567	0.64522	UC
chr12	6485459	6487091	OCR_33610	SCNN1A	-	ENSG00000111319.8	rs72645157	0.4667	6486599	0.529778	1.30329	0.0005047	rs7954567	0.869137	UC
chr12	6485459	6487091	OCR_33610	SCNN1A	-	ENSG00000111319.8	rs879605	0.4891	6486656	0.478506	1.2703	0.000491926	rs7954567	0.8756	UC
chr12	6492703	6493791	OCR_33611	LTBR	+	ENSG00000111321.6	rs28999107	1.062e-09	6493100	37.2076	1.20095e+08	0.611158	rs7954567	0.611158	CRO
chr12	6492703	6493791	OCR_33611	LTBR	+	ENSG00000111321.6	rs28999107	0.0002271	6493100	13.5924	894.453	0.0081459	rs7954567	0.928173	IBD
chr12	6492703	6493791	OCR_33611	LTBR	+	ENSG00000111321.6	rs10849448	0.2148	6493351	1.53878	2.15845	0.000835862	rs7954567	0.718177	UC
chr12	6492703	6493791	OCR_33611	LTBR	+	ENSG00000111321.6	rs3759335	0.5734	6493094	0.317027	1.17177	0.000453769	rs7954567	0.910764	UC
chr12	6492703	6493791	OCR_33611	LTBR	+	ENSG00000111321.6	rs3759336	0.5813	6493096	0.304138	1.16424	0.000450854	rs7954567	0.914381	UC
chr12	6552665	6553096	OCR_33620	CD27	+	ENSG00000139193.3	rs2250246	0.5512	6553016	0.355172	1.19433	0.000462507	rs7954567	0.897012	UC
chr12	6552665	6553096	OCR_33620	CD27	+	ENSG00000139193.3	rs2286596	0.5547	6553055	0.348964	1.19063	0.000461073	rs7954567	0.899782	UC
chr12	6553301	6553687	OCR_33621	CD27	+	ENSG00000139193.3	rs11569359	0.6109	6553604	0.258866	1.13818	0.000440763	rs7954567	0.924178	UC
chr12	6553740	6554846	OCR_33622	CD27	+	ENSG00000139193.3	rs3136551	0.2022	6553860	1.62641	2.25513	0.000873302	rs7954567	0.704554	UC
chr12	6553740	6554846	OCR_33622	CD27	+	ENSG00000139193.3	rs25680	0.2682	6554628	1.22593	1.8459	0.000714827	rs7954567	0.769577	UC
chr12	6553740	6554846	OCR_33622	CD27	+	ENSG00000139193.3	rs2534719	0.2889	6554429	1.12474	1.75483	0.00067956	rs7954567	0.787712	UC
chr12	6553740	6554846	OCR_33622	CD27	+	ENSG00000139193.3	rs11064195	0.5878	6554185	0.293793	1.15823	0.000448528	rs7954567	0.916628	UC
chr12	6560141	6561945	OCR_33625	TAPBPL	+	ENSG00000139192.7	rs11569388	0.3269	6560627	0.961139	1.617	0.000626184	rs7954567	0.800606	UC
chr12	6560141	6561945	OCR_33625	TAPBPL	+	ENSG00000139192.7	rs753359926	0.3965	6561603	0.718915	1.43255	0.000554758	rs7954567	0.845288	UC
chr12	6560141	6561945	OCR_33625	TAPBPL	+	ENSG00000139192.7	rs2532502	0.4346	6560473	0.610499	1.35696	0.000525487	rs7954567	0.859888	UC
chr12	6560141	6561945	OCR_33625	TAPBPL	+	ENSG00000139192.7	rs7132503	0.6655	6561145	0.186911	1.09796	0.000425188	rs7954567	0.94064	UC
chr12	6560141	6561945	OCR_33625	CD27-AS1	-	ENSG00000215039.2	rs11569388	0.3269	6560627	0.961139	1.617	0.000626184	rs7954567	0.800606	UC
chr12	6560141	6561945	OCR_33625	CD27-AS1	-	ENSG00000215039.2	rs753359926	0.3965	6561603	0.718915	1.43255	0.000554758	rs7954567	0.845288	UC
chr12	6560141	6561945	OCR_33625	CD27-AS1	-	ENSG00000215039.2	rs2532502	0.4346	6560473	0.610499	1.35696	0.000525487	rs7954567	0.859888	UC
chr12	6560141	6561945	OCR_33625	CD27-AS1	-	ENSG00000215039.2	rs7132503	0.6655	6561145	0.186911	1.09796	0.000425188	rs7954567	0.94064	UC
chr12	6562077	6562328	OCR_33626	CD27-AS1	-	ENSG00000215039.2	rs2041385	0.3717	6562293	0.797973	1.49031	0.000577127	rs7954567	0.831713	UC
chr12	6562077	6562328	OCR_33626	CD27-AS1	-	ENSG00000215039.2	rs2041384	0.3821	6562285	0.763935	1.46516	0.000567387	rs7954567	0.837431	UC
chr12	6562077	6562328	OCR_33626	TAPBPL	+	ENSG00000139192.7	rs2041385	0.3717	6562293	0.797973	1.49031	0.000577127	rs7954567	0.831713	UC
chr12	6562077	6562328	OCR_33626	TAPBPL	+	ENSG00000139192.7	rs2041384	0.3821	6562285	0.763935	1.46516	0.000567387	rs7954567	0.837431	UC
chr12	6569851	6571792	OCR_33627	TAPBPL	+	ENSG00000139192.7	rs7390	0.1616	6571699	1.95919	2.66338	0.0010314	rs7954567	0.666426	UC
chr12	6569851	6571792	OCR_33627	TAPBPL	+	ENSG00000139192.7	rs2534711	0.181	6570821	1.78939	2.44659	0.000947448	rs7954567	0.686206	UC
chr12	6569851	6571792	OCR_33627	TAPBPL	+	ENSG00000139192.7	rs2244083	0.2379	6570539	1.39299	2.00671	0.000777103	rs7954567	0.739084	UC
chr12	6569851	6571792	OCR_33627	TAPBPL	+	ENSG00000139192.7	rs2243977	0.2413	6569983	1.37298	1.98673	0.000769366	rs7954567	0.741396	UC
chr12	6569851	6571792	OCR_33627	TAPBPL	+	ENSG00000139192.7	rs71584828	0.2643	6571347	1.24609	1.8646	0.00072207	rs7954567	0.767424	UC
chr12	6569851	6571792	OCR_33627	TAPBPL	+	ENSG00000139192.7	rs1045548	0.3185	6570966	0.995096	1.64468	0.000636907	rs7954567	0.795568	UC
chr12	6569851	6571792	OCR_33627	TAPBPL	+	ENSG00000139192.7	rs2534710	0.3588	6570163	0.842089	1.52355	0.000589998	rs7954567	0.822975	UC
chr12	6569851	6571792	OCR_33627	TAPBPL	+	ENSG00000139192.7	rs142707363	0.4117	6571018	0.673886	1.40066	0.000542408	rs7954567	0.85297	UC
chr12	6569851	6571792	OCR_33627	TAPBPL	+	ENSG00000139192.7	rs75100764	0.4304	6569856	0.621744	1.36461	0.000528449	rs7954567	0.858308	UC
chr12	6579125	6580481	OCR_33629	VAMP1	-	ENSG00000139190.12	rs2072378	0.23	6580249	1.44086	2.05532	0.000795926	rs7954567	0.732005	UC
chr12	6579125	6580481	OCR_33629	VAMP1	-	ENSG00000139190.12	rs11064213	0.4271	6580376	0.630696	1.37074	0.00053082	rs7954567	0.857251	UC
chr12	6579125	6580481	OCR_33629	VAMP1	-	ENSG00000139190.12	rs76498272	0.4767	6579422	0.506403	1.28814	0.000498836	rs7954567	0.87114	UC
chr12	6579125	6580481	OCR_33629	VAMP1	-	ENSG00000139190.12	rs2072377	0.5822	6580228	0.302691	1.1634	0.000450528	rs7954567	0.914832	UC
chr12	6579125	6580481	OCR_33629	VAMP1	-	ENSG00000139190.12	rs12422771	0.614	6580273	0.254391	1.13564	0.000439778	rs7954567	0.925938	UC
chr12	6579125	6580481	OCR_33629	VAMP1	-	ENSG00000139190.12	rs73042333	0.6222	6580443	0.242788	1.12907	0.000437234	rs7954567	0.929006	UC
chr12	6579125	6580481	OCR_33629	VAMP1	-	ENSG00000139190.12	rs2534721	0.6296	6580144	0.232604	1.12333	0.000435013	rs7954567	0.931187	UC
chr12	9853936	9855473	OCR_33903	RP11-75L1.1	+	ENSG00000256582.1	rs10844503	5.97e-09	9854256	33.8444	2.23472e+07	0.0610086	rs11052877	0.128639	MS
chr12	9885463	9886200	OCR_33908	CLECL1	-	ENSG00000184293.3	rs12304510	6.79535e-06	9885526	20.25	24959.3	0.00807754	rs917911	0.918188	T1D
chr12	9885463	9886200	OCR_33908	CLECL1	-	ENSG00000184293.3	rs10492165	8.81193e-06	9885961	19.7531	19468.3	0.00630051	rs917911	0.94339	T1D
chr12	48206498	48207521	OCR_37389	HDAC7	-	ENSG00000061273.13	rs148066105	3.644e-11	48207460	43.7963	3.23771e+09	0.0531666	rs55726902	0.881159	ALG
chr12	48206498	48207521	OCR_37389	HDAC7	-	ENSG00000061273.13	rs78322254	0.0008696	48207497	11.0865	255.503	0.00297293	rs11168249	0.941581	IBD
chr12	48212625	48214410	OCR_37393	HDAC7	-	ENSG00000061273.13	rs113736796	5.585e-06	48213720	20.6254	30112.7	0.35038	rs11168249	0.35038	IBD
chr12	48225974	48227357	OCR_37396	HDAC7	-	ENSG00000061273.13	rs2544034	0.000211	48227128	13.7305	958.385	0.0111514	rs11168249	0.914136	IBD
chr12	56389968	56390415	OCR_38105	SUOX	+	ENSG00000139531.8	rs772920	2.518e-15	56390364	62.6113	3.94347e+13	0.00589713	rs10876864	0.954945	ALG
chr12	56401008	56402049	OCR_38107	IKZF4	+	ENSG00000123411.10	rs10876864	1.283e-15	56401085	63.9395	7.66097e+13	0.0114563	rs10876864	0.942049	ALG
chr12	56435038	56435749	OCR_38114	RPS26	+	ENSG00000197728.5	rs705704	4.093e-16	56435412	66.1909	236139732813106	0.0353127	rs10876864	0.849854	ALG
chr12	56435038	56435749	OCR_38114	RPS26	+	ENSG00000197728.5	rs705705	8.681e-16	56435504	64.7092	112568624176002	0.0168337	rs10876864	0.918736	ALG
chr12	56435038	56435749	OCR_38114	RPS26	+	ENSG00000197728.5	rs705705	4.42296e-32	56435504	138.992	1.51936e+30	0.371084	rs705705	0.371084	T1D
chr12	56435038	56435749	OCR_38114	RPS26	+	ENSG00000197728.5	rs705704	8.25101e-32	56435412	137.753	8.18058e+29	0.1998	rs705705	0.770684	T1D
chr12	56435038	56435749	OCR_38114	RPS26	+	ENSG00000197728.5	rs705705	1.78e-19	56435504	81.4694	4.90735e+17	0.0401601	rs2017445	0.775891	VIT
chr12	56435038	56435749	OCR_38114	RPS26	+	ENSG00000197728.5	rs705704	1.91e-19	56435412	81.3301	4.57716e+17	0.037458	rs2017445	0.852852	VIT
chr12	56435038	56435749	OCR_38114	RP11-603J24.4	-	ENSG00000257449.1	rs705704	4.093e-16	56435412	66.1909	236139732813106	0.0353127	rs10876864	0.849854	ALG
chr12	56435038	56435749	OCR_38114	RP11-603J24.4	-	ENSG00000257449.1	rs705705	8.681e-16	56435504	64.7092	112568624176002	0.0168337	rs10876864	0.918736	ALG
chr12	56435038	56435749	OCR_38114	RP11-603J24.4	-	ENSG00000257449.1	rs705705	4.42296e-32	56435504	138.992	1.51936e+30	0.371084	rs705705	0.371084	T1D
chr12	56435038	56435749	OCR_38114	RP11-603J24.4	-	ENSG00000257449.1	rs705704	8.25101e-32	56435412	137.753	8.18058e+29	0.1998	rs705705	0.770684	T1D
chr12	56435038	56435749	OCR_38114	RP11-603J24.4	-	ENSG00000257449.1	rs705705	1.78e-19	56435504	81.4694	4.90735e+17	0.0401601	rs2017445	0.775891	VIT
chr12	56435038	56435749	OCR_38114	RP11-603J24.4	-	ENSG00000257449.1	rs705704	1.91e-19	56435412	81.3301	4.57716e+17	0.037458	rs2017445	0.852852	VIT
chr12	56435821	56436231	OCR_38115	RPS26	+	ENSG00000197728.5	rs1131017	2.116e-15	56435929	62.9539	4.68025e+13	0.00699892	rs10876864	0.949048	ALG
chr12	56435821	56436231	OCR_38115	RP11-603J24.4	-	ENSG00000257449.1	rs1131017	2.116e-15	56435929	62.9539	4.68025e+13	0.00699892	rs10876864	0.949048	ALG
chr12	56472769	56474522	OCR_38117	ERBB3	+	ENSG00000065361.10	rs7297175	4.5e-09	56473808	34.3945	2.94215e+07	0.0246199	rs773125	0.906796	RA
chr12	56693125	56694440	OCR_38141	RP11-977G19.11	+	ENSG00000257303.1	rs41423244	9.85647e-05	56693520	15.164	1962.55	0.0198177	rs2066819	0.598927	PSO
chr12	56693125	56694440	OCR_38141	RP11-977G19.11	+	ENSG00000257303.1	rs2695789	0.000120981	56694261	14.7773	1617.54	0.0163338	rs2066819	0.857358	PSO
chr12	56693125	56694440	OCR_38141	CS	-	ENSG00000062485.14	rs41423244	9.85647e-05	56693520	15.164	1962.55	0.0198177	rs2066819	0.598927	PSO
chr12	56693125	56694440	OCR_38141	CS	-	ENSG00000062485.14	rs2695789	0.000120981	56694261	14.7773	1617.54	0.0163338	rs2066819	0.857358	PSO
chr12	56726843	56728264	OCR_38143	PAN2	-	ENSG00000135473.10	rs80317430	9.60841e-05	56727705	15.2121	2010.35	0.0203004	rs2066819	0.417488	PSO
chr12	56726843	56728264	OCR_38143	PAN2	-	ENSG00000135473.10	rs79824801	9.63814e-05	56728137	15.2063	2004.5	0.0202413	rs2066819	0.518694	PSO
chr12	56726843	56728264	OCR_38143	PAN2	-	ENSG00000135473.10	rs2371494	0.000122258	56728000	14.7575	1601.61	0.0161729	rs2066819	0.873531	PSO
chr12	56726843	56728264	OCR_38143	PAN2	-	ENSG00000135473.10	rs11358218	0.00012968	56728259	14.6464	1515.07	0.015299	rs2066819	0.936846	PSO
chr12	58087458	58088423	OCR_38262	OS9	+	ENSG00000135506.11	rs4760168	6.7e-06	58087737	20.277	25298.9	0.00572972	rs1633360	0.672756	RA
chr12	58175149	58175467	OCR_38277	TSFM	+	ENSG00000123297.12	rs11172335	1.09e-11	58175201	46.1596	1.05545e+10	0.031494	rs201202118	0.578403	MS
chr12	58176011	58177173	OCR_38279	TSFM	+	ENSG00000123297.12	rs10747783	1.54e-11	58176614	45.4826	7.52356e+09	0.02245	rs201202118	0.863936	MS
chr12	68382391	68382861	OCR_39354	IFNG-AS1	+	ENSG00000255733.1	rs187447202	0.0888441	68382649	2.89519	4.25288	0.000205819	rs7486855	0.851813	SLE
chr12	68382391	68382861	OCR_39354	IFNG-AS1	+	ENSG00000255733.1	rs78836744	0.268293	68382705	1.22545	1.84546	8.93113e-05	rs7486855	0.897224	SLE
chr12	68382391	68382861	OCR_39354	IFNG-AS1	+	ENSG00000255733.1	rs149558972	0.345478	68382585	0.889997	1.56049	7.55202e-05	rs7486855	0.908471	SLE
chr12	68383008	68383338	OCR_39355	IFNG-AS1	+	ENSG00000255733.1	rs551215733	0.218984	68383093	1.51102	2.12869	0.000103019	rs7486855	0.889693	SLE
chr12	68383008	68383338	OCR_39355	IFNG-AS1	+	ENSG00000255733.1	rs79735780	0.5178	68383052	0.418273	1.23261	5.96526e-05	rs7486855	0.931859	SLE
chr12	68383008	68383338	OCR_39355	IFNG-AS1	+	ENSG00000255733.1	rs59781510	0.562149	68383274	0.335997	1.18293	5.72484e-05	rs7486855	0.936417	SLE
chr12	68383389	68383720	OCR_39356	IFNG-AS1	+	ENSG00000255733.1	rs150482158	0.0646026	68383507	3.4151	5.51543	0.00026692	rs7486855	0.834773	SLE
chr12	68383389	68383720	OCR_39356	IFNG-AS1	+	ENSG00000255733.1	rs55637283	0.0659756	68383584	3.38041	5.42059	0.000262331	rs7486855	0.836884	SLE
chr12	68383389	68383720	OCR_39356	IFNG-AS1	+	ENSG00000255733.1	rs55853686	0.066012	68383624	3.3795	5.41813	0.000262212	rs7486855	0.837146	SLE
chr12	68383389	68383720	OCR_39356	IFNG-AS1	+	ENSG00000255733.1	12:68383552	0.421835	68383552	0.645197	1.38071	6.68198e-05	rs7486855	0.920318	SLE
chr12	121272785	121273376	OCR_44212	SPPL3	-	ENSG00000157837.11	rs532703	8.712e-12	121273143	46.5987	1.31453e+10	0.00279442	rs6489785	0.936882	ALG
chr12	121341095	121342584	OCR_44220	SPPL3	-	ENSG00000157837.11	rs2393716	1.275e-11	121341933	45.8525	9.05201e+09	0.00192427	rs6489785	0.946208	ALG
chr12	123518343	123519107	OCR_44407	PITPNM2	-	ENSG00000090975.8	rs641760	7.48e-06	123518866	20.0664	22769.8	0.0345036	rs7132277	0.435887	MS
chr12	123560149	123560899	OCR_44414	PITPNM2	-	ENSG00000090975.8	rs1260294	3.84e-06	123560289	21.3431	43111.8	0.0653282	rs7132277	0.194978	MS
chr12	123707733	123708268	OCR_44425	MPHOSPH9	-	ENSG00000051825.10	rs1626899	9.932e-06	123708063	19.5245	17365.3	0.00254192	rs63406760	0.856791	ALG
chr12	129286688	129286983	OCR_44645	SLC15A4	-	ENSG00000139370.6	rs12298615	2.71735e-06	129286756	22.0065	60067.7	0.0246082	rs11059927	0.314679	SLE
chr12	129307649	129309292	OCR_44648	SLC15A4	-	ENSG00000139370.6	rs34616325	1.04974e-05	129307699	19.4187	16470.9	0.00674771	rs11059927	0.86978	SLE
chr13	41240299	41241585	OCR_45834	FOXO1	-	ENSG00000150907.6	rs35594717	3.718e-08	41240783	30.2912	3.78147e+06	0.0394045	rs4943794	0.707385	ALG
chr13	42845449	42847283	OCR_45963	AKAP11	+	ENSG00000023516.7	rs183583501	0.02407	42845582	5.08958	12.7406	0.00505342	rs80244186	0.460234	UC
chr13	42845449	42847283	OCR_45963	AKAP11	+	ENSG00000023516.7	rs143265763	0.09801	42847014	2.73763	3.93069	0.00155907	rs80244186	0.594594	UC
chr13	42845449	42847283	OCR_45963	AKAP11	+	ENSG00000023516.7	rs77085139	0.09994	42846554	2.7065	3.86998	0.00153499	rs80244186	0.597668	UC
chr13	42845449	42847283	OCR_45963	AKAP11	+	ENSG00000023516.7	rs9533054	0.4147	42846438	0.665286	1.39465	0.000553174	rs80244186	0.878829	UC
chr13	44359746	44361673	OCR_46031	RP11-168P13.1	+	ENSG00000270522.1	rs115385546	0.4817	44361498	0.495012	1.28083	0.000660228	rs3764147	0.839109	UC
chr13	44359746	44361673	OCR_46031	ENOX1	-	ENSG00000120658.8	rs115385546	0.4817	44361498	0.495012	1.28083	0.000660228	rs3764147	0.839109	UC
chr13	44453032	44454618	OCR_46035	LACC1	+	ENSG00000179630.6	rs3816312	0.1124	44453873	2.52015	3.52568	0.00181739	rs3764147	0.381523	UC
chr13	44453032	44454618	OCR_46035	LACC1	+	ENSG00000179630.6	rs9562518	0.1569	44454216	2.00385	2.72352	0.0014039	rs3764147	0.486125	UC
chr13	44453032	44454618	OCR_46035	LACC1	+	ENSG00000179630.6	rs9567295	0.1709	44453235	1.87503	2.55363	0.00131632	rs3764147	0.528268	UC
chr13	44453032	44454618	OCR_46035	LACC1	+	ENSG00000179630.6	rs3818818	0.2847	44454455	1.14452	1.77226	0.00091355	rs3764147	0.743017	UC
chr13	44453032	44454618	OCR_46035	LACC1	+	ENSG00000179630.6	rs76474346	0.3291	44454158	0.952436	1.60997	0.000829894	rs3764147	0.768157	UC
chr13	44453032	44454618	OCR_46035	CCDC122	-	ENSG00000151773.8	rs3816312	0.1124	44453873	2.52015	3.52568	0.00181739	rs3764147	0.381523	UC
chr13	44453032	44454618	OCR_46035	CCDC122	-	ENSG00000151773.8	rs9562518	0.1569	44454216	2.00385	2.72352	0.0014039	rs3764147	0.486125	UC
chr13	44453032	44454618	OCR_46035	CCDC122	-	ENSG00000151773.8	rs9567295	0.1709	44453235	1.87503	2.55363	0.00131632	rs3764147	0.528268	UC
chr13	44453032	44454618	OCR_46035	CCDC122	-	ENSG00000151773.8	rs3818818	0.2847	44454455	1.14452	1.77226	0.00091355	rs3764147	0.743017	UC
chr13	44453032	44454618	OCR_46035	CCDC122	-	ENSG00000151773.8	rs76474346	0.3291	44454158	0.952436	1.60997	0.000829894	rs3764147	0.768157	UC
chr13	44482606	44483273	OCR_46037	LINC00284	+	ENSG00000233725.3	rs73467552	0.1262	44483215	2.33864	3.2198	0.00165971	rs3764147	0.411205	UC
chr13	44482606	44483273	OCR_46037	LINC00284	+	ENSG00000233725.3	rs77813120	0.2442	44483077	1.35618	1.97011	0.00101554	rs3764147	0.675194	UC
chr13	44482606	44483273	OCR_46037	LINC00284	+	ENSG00000233725.3	rs78919027	0.2634	44482856	1.2508	1.86899	0.00096341	rs3764147	0.717785	UC
chr13	44482606	44483273	OCR_46037	LINC00284	+	ENSG00000233725.3	rs7999434	0.7454	44482961	0.105437	1.05413	0.000543374	rs3764147	0.925808	UC
chr13	44482606	44483273	OCR_46037	LINC00284	+	ENSG00000233725.3	rs12867732	0.8063	44483084	0.060124	1.03052	0.000531202	rs3764147	0.948331	UC
chr13	50798622	50799020	OCR_46416	DLEU1	+	ENSG00000176124.7	rs2580188	0.0002419	50798730	13.4739	843.002	0.100617	rs2762051	0.751374	CEL
chr13	99910284	99911052	OCR_50281	GPR18	-	ENSG00000125245.8	rs117908129	0.004488	99911016	8.075	56.6846	0.00720442	rs9557195	0.712657	UC
chr13	99910284	99911052	OCR_50281	GPR18	-	ENSG00000125245.8	rs3759443	0.09437	99910322	2.7982	4.05156	0.000514939	rs9557195	0.889662	UC
chr13	99966522	99967809	OCR_50305	UBAC2	+	ENSG00000134882.11	rs16956449	0.2782	99966605	1.17586	1.80026	0.000228807	rs9557195	0.948746	UC
chr13	100008182	100008473	OCR_50316	MIR623	+	ENSG00000207719.1	rs7993715	0.1685	100008313	1.89624	2.58085	0.000328017	rs9557195	0.927332	UC
chr13	100008182	100008473	OCR_50316	MIR623	+	ENSG00000207719.1	rs72649597	0.2838	100008340	1.1488	1.77607	0.000225732	rs9557195	0.950108	UC
chr13	100018960	100019148	OCR_50323	UBAC2	+	ENSG00000134882.11	rs7998034	2.792e-06	100018975	21.9544	58525.7	0.0147659	rs9557195	0.814463	IBD
chr13	100018960	100019148	OCR_50323	UBAC2	+	ENSG00000134882.11	rs7998034	0.004099	100018975	8.23943	61.5417	0.00782174	rs9557195	0.66779	UC
chr13	100019347	100019919	OCR_50324	UBAC2	+	ENSG00000134882.11	rs143052672	0.07559	100019668	3.15726	4.84831	0.000616203	rs9557195	0.876694	UC
chr13	100020379	100020641	OCR_50325	UBAC2	+	ENSG00000134882.11	rs148666432	0.04989	100020518	3.84515	6.83855	0.000869156	rs9557195	0.860703	UC
chr14	35514783	35516348	OCR_51923	FAM177A1	+	ENSG00000151327.8	rs3809449	0.000448	35514957	12.3205	473.557	0.00769853	rs2143950	0.82387	ECZ
chr14	35590761	35592249	OCR_51924	KIAA0391	+	ENSG00000100890.11	rs28365850	0.00016	35591316	14.2507	1243.09	0.0202087	rs2143950	0.384802	ECZ
chr14	35590761	35592249	OCR_51924	PPP2R3C	-	ENSG00000092020.6	rs28365850	0.00016	35591316	14.2507	1243.09	0.0202087	rs2143950	0.384802	ECZ
chr14	35590761	35592249	OCR_51924	KIAA0391	+	ENSG00000258790.1	rs28365850	0.00016	35591316	14.2507	1243.09	0.0202087	rs2143950	0.384802	ECZ
chr14	35592362	35592607	OCR_51925	PPP2R3C	-	ENSG00000092020.6	rs941653	0.000358	35592538	12.7396	583.932	0.00949288	rs2143950	0.789577	ECZ
chr14	35592362	35592607	OCR_51925	KIAA0391	+	ENSG00000100890.11	rs941653	0.000358	35592538	12.7396	583.932	0.00949288	rs2143950	0.789577	ECZ
chr14	35761100	35762083	OCR_51939	AL121594.1	+	ENSG00000265530.1	rs1048990	7.33e-06	35761675	20.1051	23215.2	0.144381	rs1048990	0.144381	ALG
chr14	35761100	35762083	OCR_51939	PSMA6	+	ENSG00000100902.6	rs1048990	7.33e-06	35761675	20.1051	23215.2	0.144381	rs1048990	0.144381	ALG
chr14	61919095	61919731	OCR_53626	PRKCH	+	ENSG00000027075.9	rs3825655	8.6e-07	61919143	24.2185	181548	0.0114618	rs3783782	0.7452	RA
chr14	61919095	61919731	OCR_53626	PRKCH	+	ENSG00000027075.9	rs3783799	8.6e-07	61919216	24.2185	181548	0.0114618	rs3783782	0.756662	RA
chr14	61919095	61919731	OCR_53626	PRKCH	+	ENSG00000027075.9	rs2296275	6.4e-07	61919702	24.7878	241330	0.0152361	rs3783782	0.46837	RA
chr14	61943168	61944068	OCR_53633	PRKCH	+	ENSG00000027075.9	chr14:61943759	9.4e-07	61943759	24.0473	166646	0.010521	rs3783782	0.90289	RA
chr14	69259565	69260368	OCR_54073	ZFP36L1	-	ENSG00000185650.8	rs1051533	4.259e-06	69259662	21.1446	39038.3	0.44929	rs4899260	0.44929	CEL
chr14	69260776	69261480	OCR_54075	ZFP36L1	-	ENSG00000185650.8	rs2236262	1.16e-05	69261472	19.228	14972.9	0.110657	rs2236262	0.110657	MS
chr14	75744836	75746383	OCR_54486	FOS	+	ENSG00000170345.5	rs4645854	2.57e-07	75746144	26.5485	582023	0.0640527	rs1569328	0.834764	CRO
chr14	88458651	88460089	OCR_54967	GALC	-	ENSG00000054983.12	rs73312836	2.95e-09	88459795	35.2166	4.43798e+07	0.0103693	rs74796499	0.867658	MS
chr14	88489809	88490575	OCR_54974	RP11-300J18.3	+	ENSG00000258867.1	rs74074328	6.26e-09	88490211	33.7521	2.13395e+07	0.00498596	rs74796499	0.915183	MS
chr14	103243059	103244684	OCR_55817	TRAF3	+	ENSG00000131323.10	rs71421262	0.0576537	103243408	3.60363	6.06062	0.000170593	rs2015407	0.920507	SLE
chr14	103243059	103244684	OCR_55817	TRAF3	+	ENSG00000131323.10	rs201273005	0.0510114	103243456	3.8079	6.71235	0.000188937	rs2015407	0.917658	SLE
chr14	103243059	103244684	OCR_55817	TRAF3	+	ENSG00000131323.10	rs1051750	0.0580095	103243946	3.5934	6.02971	0.000169723	rs2015407	0.920846	SLE
chr14	103243059	103244684	OCR_55817	TRAF3	+	ENSG00000131323.10	rs71421264	0.0580025	103244070	3.5936	6.03032	0.00016974	rs2015407	0.920677	SLE
chr14	103243059	103244684	OCR_55817	TRAF3	+	ENSG00000131323.10	rs79589176	0.0571808	103244289	3.61732	6.10228	0.000171765	rs2015407	0.920336	SLE
chr14	103243059	103244684	OCR_55817	TRAF3	+	ENSG00000131323.10	rs578168050	0.0117282	103244343	6.3515	23.9448	0.000673991	rs2015407	0.836469	SLE
chr15	74987855	74989036	OCR_58690	EDC3	-	ENSG00000179151.7	rs558216476	0.258285	74988252	1.27793	1.89452	0.000377491	rs1378942	0.734361	SLE
chr15	74987855	74989036	OCR_58690	EDC3	-	ENSG00000179151.7	rs77363088	0.330505	74988539	0.946918	1.60554	0.000319911	rs1378942	0.764079	SLE
chr15	74987855	74989036	OCR_58690	EDC3	-	ENSG00000179151.7	rs550722626	0.861243	74988301	0.0305523	1.01539	0.000202322	rs1378942	0.926579	SLE
chr15	75017794	75019278	OCR_58692	CYP1A1	-	ENSG00000140465.9	rs3826042	0.0655285	75018905	3.39162	5.45106	0.00108615	rs1378942	0.554506	SLE
chr15	75017794	75019278	OCR_58692	CYP1A1	-	ENSG00000140465.9	rs374583096	0.207352	75019198	1.58982	2.21424	0.000441197	rs1378942	0.713589	SLE
chr15	75017794	75019278	OCR_58692	CYP1A1	-	ENSG00000140465.9	rs17861099	0.243671	75018340	1.35923	1.97312	0.000393152	rs1378942	0.728602	SLE
chr15	75017794	75019278	OCR_58692	CYP1A1	-	ENSG00000140465.9	rs36090160	0.341821	75019185	0.90359	1.57113	0.000313055	rs1378942	0.773593	SLE
chr15	75017794	75019278	OCR_58692	CYP1A1	-	ENSG00000140465.9	rs4646417	0.472855	75018931	0.515296	1.29388	0.000257812	rs1378942	0.816203	SLE
chr15	75017794	75019278	OCR_58692	CYP1A1	-	ENSG00000140465.9	rs3826041	0.603687	75018890	0.269471	1.14423	0.000227994	rs1378942	0.858672	SLE
chr15	75017794	75019278	OCR_58692	CYP1A1	-	ENSG00000140465.9	rs35686934	0.704119	75018330	0.144222	1.07477	0.000214154	rs1378942	0.885245	SLE
chr15	75017794	75019278	OCR_58692	CYP1A1	-	ENSG00000140465.9	rs552361034	0.887071	75017867	0.0201672	1.01013	0.000201274	rs1378942	0.946542	SLE
chr15	75073295	75073929	OCR_58697	CSK	+	ENSG00000103653.12	rs564160819	0.585722	75073331	0.297075	1.16014	0.000231162	rs1378942	0.85477	SLE
chr15	75073295	75073929	OCR_58697	CSK	+	ENSG00000103653.12	rs117001954	0.642843	75073396	0.215043	1.11351	0.000221873	rs1378942	0.871941	SLE
chr15	75073295	75073929	OCR_58697	CSK	+	ENSG00000103653.12	rs141856776	0.793894	75073499	0.0682554	1.03472	0.000206172	rs1378942	0.913735	SLE
chr15	75073295	75073929	OCR_58697	CSK	+	ENSG00000103653.12	rs139529999	0.880277	75073428	0.0226858	1.01141	0.000201527	rs1378942	0.93768	SLE
chr15	75074184	75074546	OCR_58699	CSK	+	ENSG00000103653.12	rs183551129	0.132634	75074382	2.2614	3.09783	0.000617256	rs1378942	0.642481	SLE
chr15	75074184	75074546	OCR_58699	CSK	+	ENSG00000103653.12	rs201211427	0.178697	75074314	1.80843	2.46999	0.000492156	rs1378942	0.698221	SLE
chr15	75074184	75074546	OCR_58699	CSK	+	ENSG00000103653.12	rs575452209	0.312144	75074354	1.02158	1.66661	0.000332079	rs1378942	0.752693	SLE
chr15	75074184	75074546	OCR_58699	CSK	+	ENSG00000103653.12	rs34755093	0.380292	75074204	0.769758	1.46944	0.000292792	rs1378942	0.78785	SLE
chr15	75074184	75074546	OCR_58699	CSK	+	ENSG00000103653.12	rs528173704	0.559754	75074508	0.34013	1.18538	0.000236193	rs1378942	0.842635	SLE
chr15	75074184	75074546	OCR_58699	CSK	+	ENSG00000103653.12	rs186442904	0.783657	75074527	0.0753813	1.03841	0.000206908	rs1378942	0.908157	SLE
chr15	75079804	75080582	OCR_58701	CSK	+	ENSG00000103653.12	rs1378941	0.00863922	75080150	6.89593	31.4364	0.00626383	rs1378942	0.336892	SLE
chr15	75079804	75080582	OCR_58701	CSK	+	ENSG00000103653.12	rs8028495	0.548321	75080491	0.360334	1.19742	0.000238591	rs1378942	0.835748	SLE
chr15	75079804	75080582	OCR_58701	CSK	+	ENSG00000103653.12	15:75080241	0.738596	75080241	0.111364	1.05726	0.000210664	rs1378942	0.895858	SLE
chr15	75079804	75080582	OCR_58701	CSK	+	ENSG00000103653.12	rs34896354	0.836395	75079867	0.0426451	1.02155	0.000203549	rs1378942	0.921103	SLE
chr15	75081095	75081523	OCR_58702	CSK	+	ENSG00000103653.12	rs371065814	0.321599	75081431	0.982432	1.6343	0.000325642	rs1378942	0.75796	SLE
chr15	75081095	75081523	OCR_58702	CSK	+	ENSG00000103653.12	rs555827757	0.448206	75081146	0.575185	1.33321	0.000265649	rs1378942	0.808373	SLE
chr15	75081095	75081523	OCR_58702	CSK	+	ENSG00000103653.12	rs111962183	0.549169	75081115	0.358808	1.1965	0.000238409	rs1378942	0.835986	SLE
chr15	75081095	75081523	OCR_58702	CSK	+	ENSG00000103653.12	rs542007111	0.884721	75081286	0.0210213	1.01057	0.00020136	rs1378942	0.943724	SLE
chr15	75081095	75081523	OCR_58702	MIR4513	-	ENSG00000264386.1	rs371065814	0.321599	75081431	0.982432	1.6343	0.000325642	rs1378942	0.75796	SLE
chr15	75081095	75081523	OCR_58702	MIR4513	-	ENSG00000264386.1	rs555827757	0.448206	75081146	0.575185	1.33321	0.000265649	rs1378942	0.808373	SLE
chr15	75081095	75081523	OCR_58702	MIR4513	-	ENSG00000264386.1	rs111962183	0.549169	75081115	0.358808	1.1965	0.000238409	rs1378942	0.835986	SLE
chr15	75081095	75081523	OCR_58702	MIR4513	-	ENSG00000264386.1	rs542007111	0.884721	75081286	0.0210213	1.01057	0.00020136	rs1378942	0.943724	SLE
chr15	75088250	75088897	OCR_58706	CSK	+	ENSG00000103653.12	rs546941347	0.333459	75088669	0.935418	1.59633	0.000318076	rs1378942	0.768873	SLE
chr15	75088250	75088897	OCR_58706	CSK	+	ENSG00000103653.12	rs186389081	0.62813	75088698	0.234605	1.12446	0.000224054	rs1378942	0.86682	SLE
chr15	75088250	75088897	OCR_58706	CSK	+	ENSG00000103653.12	rs78386305	0.785231	75088697	0.0742609	1.03783	0.000206792	rs1378942	0.908985	SLE
chr15	75088250	75088897	OCR_58706	CSK	+	ENSG00000103653.12	rs372830649	0.785606	75088359	0.0739953	1.03769	0.000206764	rs1378942	0.909398	SLE
chr15	75088250	75088897	OCR_58706	CSK	+	ENSG00000103653.12	rs186716518	0.785606	75088428	0.0739953	1.03769	0.000206764	rs1378942	0.909605	SLE
chr15	75091882	75092823	OCR_58707	CSK	+	ENSG00000103653.12	rs2301249	0.0849002	75092384	2.96851	4.41167	0.000879045	rs1378942	0.583561	SLE
chr15	75091882	75092823	OCR_58707	CSK	+	ENSG00000103653.12	rs35625871	0.641246	75092546	0.217116	1.11467	0.000222103	rs1378942	0.87061	SLE
chr15	75091882	75092823	OCR_58707	CSK	+	ENSG00000103653.12	rs35015218	0.641384	75092187	0.216937	1.11457	0.000222083	rs1378942	0.871054	SLE
chr15	75091882	75092823	OCR_58707	CSK	+	ENSG00000103653.12	rs34029216	0.755066	75092691	0.0973231	1.04986	0.00020919	rs1378942	0.899216	SLE
chr15	75110925	75111478	OCR_58710	LMAN1L	+	ENSG00000140506.12	rs76196923	0.157088	75111216	2.00204	2.72105	0.000542182	rs1378942	0.670774	SLE
chr15	75110925	75111478	OCR_58710	LMAN1L	+	ENSG00000140506.12	rs367647321	0.293394	75111223	1.10398	1.73671	0.000346047	rs1378942	0.746602	SLE
chr15	75110925	75111478	OCR_58710	LMAN1L	+	ENSG00000140506.12	rs117209666	0.373338	75111007	0.792524	1.48626	0.000296144	rs1378942	0.785493	SLE
chr15	75110925	75111478	OCR_58710	LMAN1L	+	ENSG00000140506.12	rs111973536	0.599591	75111092	0.275613	1.14775	0.000228695	rs1378942	0.857988	SLE
chr15	75110925	75111478	OCR_58710	LMAN1L	+	ENSG00000140506.12	rs550228921	0.841473	75111371	0.0400039	1.0202	0.00020328	rs1378942	0.92212	SLE
chr15	75110925	75111478	OCR_58710	LMAN1L	+	ENSG00000140506.12	rs74025850	0.887964	75111152	0.0198474	1.00997	0.000201242	rs1378942	0.948152	SLE
chr15	75118705	75119078	OCR_58711	CPLX3	+	ENSG00000213578.4	rs532318141	0.524777	75118732	0.404495	1.22415	0.000243918	rs1378942	0.829713	SLE
chr15	75134952	75135947	OCR_58713	ULK3	-	ENSG00000140474.8	rs2290574	0.112078	75135447	2.52467	3.53367	0.000704099	rs1378942	0.624076	SLE
chr15	75134952	75135947	OCR_58713	ULK3	-	ENSG00000140474.8	rs545504701	0.265163	75135576	1.2416	1.86042	0.000370696	rs1378942	0.735857	SLE
chr15	75134952	75135947	OCR_58713	ULK3	-	ENSG00000140474.8	rs10220784	0.495056	75135512	0.465519	1.26208	0.000251475	rs1378942	0.822294	SLE
chr15	75134952	75135947	OCR_58713	ULK3	-	ENSG00000140474.8	rs551757357	0.740939	75135248	0.109303	1.05617	0.000210447	rs1378942	0.896279	SLE
chr15	75164625	75164879	OCR_58719	SCAMP2	-	ENSG00000140497.12	rs186390658	0.0558864	75164741	3.65544	6.21969	0.0012393	rs1378942	0.534855	SLE
chr15	75164625	75164879	OCR_58719	SCAMP2	-	ENSG00000140497.12	rs554261102	0.414386	75164700	0.666182	1.39527	0.000278015	rs1378942	0.796964	SLE
chr15	75164625	75164879	OCR_58719	SCAMP2	-	ENSG00000140497.12	rs139591283	0.878496	75164848	0.0233711	1.01175	0.000201597	rs1378942	0.93506	SLE
chr15	75165087	75165997	OCR_58720	SCAMP2	-	ENSG00000140497.12	rs11857695	0.0514752	75165751	3.79274	6.66168	0.00132737	rs1378942	0.522122	SLE
chr15	75165087	75165997	OCR_58720	SCAMP2	-	ENSG00000140497.12	rs564521289	0.151203	75165667	2.06007	2.80117	0.000558145	rs1378942	0.665835	SLE
chr15	75165087	75165997	OCR_58720	SCAMP2	-	ENSG00000140497.12	rs146102692	0.859446	75165831	0.0313571	1.0158	0.000202403	rs1378942	0.925769	SLE
chr15	91025711	91025894	OCR_59462	IQGAP1	+	ENSG00000140575.8	rs11853271	9.084e-08	91025830	28.56	1.59119e+06	0.0177603	rs3540	0.93365	ALG
chr16	11348727	11350271	OCR_60489	SOCS1	-	ENSG00000185338.4	rs243332	1.295e-08	11349678	32.3388	1.05265e+07	0.040505	rs529866	0.342714	CRO
chr16	11348727	11350271	OCR_60489	SOCS1	-	ENSG00000185338.4	rs243332	1.972e-08	11349678	31.5219	6.99683e+06	0.0094328	rs529866	0.912248	IBD
chr16	11348727	11350271	OCR_60489	SOCS1	-	ENSG00000185338.4	rs243332	0.000343	11349678	12.8196	607.784	0.00681802	rs529866	0.734567	UC
chr16	11348727	11350271	OCR_60489	SOCS1	-	ENSG00000185338.4	rs33977706	0.0005646	11350155	11.8892	381.689	0.00428172	rs529866	0.781053	UC
chr16	11351167	11351410	OCR_60491	SOCS1	-	ENSG00000185338.4	rs193778	4.42931e-10	11351211	38.9138	2.81859e+08	0.100621	rs193778	0.668078	T1D
chr16	11351167	11351410	OCR_60491	SOCS1	-	ENSG00000185338.4	rs193778	4.42931e-10	11351211	38.9138	2.81859e+08	0.100621	rs193778	0.668078	T1D
chr16	11406549	11406961	OCR_60501	RMI2	+	ENSG00000175643.7	rs72773819	6.116e-08	11406792	29.3263	2.33413e+06	0.00898146	rs529866	0.759059	CRO
chr16	11406549	11406961	OCR_60501	RMI2	+	ENSG00000175643.7	rs72773819	4.43e-10	11406792	38.9135	2.81816e+08	0.0676411	rs6498184	0.703081	MS
chr16	11406549	11406961	OCR_60501	RMI2	+	ENSG00000175643.7	rs72773819	0.003345	11406792	8.60903	74.0334	0.000830494	rs529866	0.927798	UC
chr16	11406549	11406961	OCR_60501	RMI2	+	ENSG00000175643.7	rs7191700	0.0003826	11406803	12.6153	548.757	0.00615586	rs529866	0.740723	UC
chr16	11438898	11439817	OCR_60506	RP11-485G7.5	-	ENSG00000263080.1	rs12149160	0.0005039	11439303	12.1012	424.363	0.00476043	rs529866	0.767924	UC
chr16	11438898	11439817	OCR_60506	RP11-485G7.5	-	ENSG00000263080.1	rs918737	0.003787	11439639	8.38322	66.1293	0.000741828	rs529866	0.936405	UC
chr16	11438898	11439817	OCR_60506	RMI2	+	ENSG00000175643.7	rs12149160	0.0005039	11439303	12.1012	424.363	0.00476043	rs529866	0.767924	UC
chr16	11438898	11439817	OCR_60506	RMI2	+	ENSG00000175643.7	rs918737	0.003787	11439639	8.38322	66.1293	0.000741828	rs529866	0.936405	UC
chr16	23846721	23848676	OCR_60944	PRKCB	+	ENSG00000166501.8	rs11645239	2.164e-08	23847062	31.3415	6.39335e+06	0.110479	rs7404095	0.226533	IBD
chr16	23846721	23848676	OCR_60944	PRKCB	+	ENSG00000166501.8	rs11645239	4.14e-09	23847062	34.5568	3.19085e+07	0.128227	rs7404095	0.128227	UC
chr16	28505131	28506267	OCR_61189	CLN3	-	ENSG00000188603.12	rs151234	4.80283e-11	28505660	43.2559	2.47117e+09	0.259741	rs151234	0.259741	T1D
chr16	28505131	28506267	OCR_61189	APOBR	+	ENSG00000184730.6	rs151234	4.80283e-11	28505660	43.2559	2.47117e+09	0.259741	rs151234	0.259741	T1D
chr16	28519011	28519771	OCR_61190	IL27	-	ENSG00000197272.2	rs153109	1.306e-06	28519096	23.4144	121441	0.0123599	rs28449958	0.652711	UC
chr16	28565051	28566219	OCR_61192	CCDC101	+	ENSG00000176476.4	rs67340371	4.7e-07	28565269	25.3832	325002	0.0330778	rs28449958	0.415552	UC
chr16	28565051	28566219	OCR_61192	CCDC101	+	ENSG00000176476.4	rs7191618	1.666e-12	28565667	49.8425	6.65505e+10	0.0103086	rs28449958	0.760176	CRO
chr16	28565051	28566219	OCR_61192	CCDC101	+	ENSG00000176476.4	rs7191618	1.115e-14	28565667	59.6819	9.11485e+12	0.0109648	rs28449958	0.823488	IBD
chr16	28565051	28566219	OCR_61192	CCDC101	+	ENSG00000176476.4	rs7191618	3.77258e-10	28565667	39.2271	3.2966e+08	0.03465	rs151234	0.785354	T1D
chr16	28565051	28566219	OCR_61192	CCDC101	+	ENSG00000176476.4	rs7191618	2.898e-06	28565667	21.8829	56470.1	0.00574737	rs28449958	0.86382	UC
chr16	28565051	28566219	OCR_61192	CCDC101	+	ENSG00000176476.4	rs3859172	1.975e-12	28566158	49.5086	5.63203e+10	0.00872399	rs28449958	0.825373	CRO
chr16	28565051	28566219	OCR_61192	CCDC101	+	ENSG00000176476.4	rs3859172	1.136e-14	28566158	59.6451	8.94902e+12	0.0107653	rs28449958	0.845199	IBD
chr16	28565051	28566219	OCR_61192	CCDC101	+	ENSG00000176476.4	rs3859172	1.90984e-10	28566158	40.5568	6.40906e+08	0.0673645	rs151234	0.654211	T1D
chr16	28565051	28566219	OCR_61192	CCDC101	+	ENSG00000176476.4	rs3859172	2.676e-06	28566158	22.0359	60958.2	0.00620416	rs28449958	0.827781	UC
chr16	30952980	30954394	OCR_61383	FBXL19	+	ENSG00000099364.12	rs1458202	1.83599e-05	30953202	18.3523	9663.81	0.0169533	rs12445568	0.777827	PSO
chr16	30968292	30968654	OCR_61385	SETD1A	+	ENSG00000099381.12	rs4889599	1.49477e-05	30968589	18.7442	11755.8	0.0206233	rs12445568	0.687783	PSO
chr16	31021220	31022645	OCR_61390	STX1B	-	ENSG00000099365.5	rs72800847	1.66205e-05	31022639	18.542	10625.2	0.0186398	rs12445568	0.725755	PSO
chr16	31043937	31045799	OCR_61391	STX4	+	ENSG00000103496.10	rs58726213	1.2835e-05	31044683	19.0349	13594.8	0.0238495	rs12445568	0.470626	PSO
chr16	31043937	31045799	OCR_61391	STX4	+	ENSG00000103496.10	rs12445650	1.16926e-05	31044897	19.2128	14859.7	0.0260684	rs12445568	0.297412	PSO
chr16	68562402	68562869	OCR_62516	ZFP90	+	ENSG00000184939.11	rs4783653	8.0383e-06	68562815	19.9287	21255.4	0.00543569	rs1170436	0.794447	SLE
chr16	68563609	68564563	OCR_62517	ZFP90	+	ENSG00000184939.11	rs1728773	4.97929e-06	68563644	20.8452	33611.3	0.00859549	rs1170436	0.402348	SLE
chr16	68563609	68564563	OCR_62517	ZFP90	+	ENSG00000184939.11	rs1645936	5.6879e-06	68563743	20.5905	29591.1	0.00756738	rs1170436	0.582304	SLE
chr16	68563609	68564563	OCR_62517	ZFP90	+	ENSG00000184939.11	rs1645935	7.32953e-06	68563791	20.1052	23216.6	0.00593723	rs1170436	0.777427	SLE
chr16	68563609	68564563	OCR_62517	ZFP90	+	ENSG00000184939.11	rs1728770	4.60074e-06	68564124	20.9967	36255.7	0.00927174	rs1170436	0.304246	SLE
chr16	68563609	68564563	OCR_62517	ZFP90	+	ENSG00000184939.11	rs1728769	6.13919e-06	68564186	20.4443	27505.8	0.00703412	rs1170436	0.684	SLE
chr16	68563609	68564563	OCR_62517	ZFP90	+	ENSG00000184939.11	rs1645975	6.89681e-06	68564448	20.2216	24607.9	0.00629303	rs1170436	0.765318	SLE
chr16	68563609	68564563	OCR_62517	ZFP90	+	ENSG00000184939.11	rs1645934	6.30383e-06	68564490	20.3937	26818	0.00685823	rs1170436	0.718798	SLE
chr16	68572637	68574210	OCR_62518	ZFP90	+	ENSG00000184939.11	rs1170445	5.28464e-06	68573064	20.7313	31749.3	0.00811931	rs1170436	0.543519	SLE
chr16	68572637	68574210	OCR_62518	ZFP90	+	ENSG00000184939.11	rs1170444	4.4316e-06	68573287	21.0685	37580.3	0.00961049	rs1170436	0.239291	SLE
chr16	68572637	68574210	OCR_62518	ZFP90	+	ENSG00000184939.11	rs1170443	4.59679e-06	68573295	20.9984	36285.6	0.00927937	rs1170436	0.276425	SLE
chr16	68572637	68574210	OCR_62518	ZFP90	+	ENSG00000184939.11	rs1182968	4.60028e-06	68573945	20.9969	36259.2	0.00927263	rs1170436	0.294975	SLE
chr16	68572637	68574210	OCR_62518	ZFP90	+	ENSG00000184939.11	rs1170442	4.59819e-06	68574064	20.9978	36275	0.00927667	rs1170436	0.285702	SLE
chr16	75252176	75252573	OCR_62773	CTRB1	+	ENSG00000168925.6	rs8056814	3.02655e-19	75252327	80.4204	2.90447e+17	0.983301	rs8056814	0.983301	T1D
chr17	4457904	4459116	OCR_63889	MYBBP1A	-	ENSG00000132382.10	rs3809849	0.1162	4458598	2.46781	3.43461	0.000213454	rs71368508	0.948619	ALG
chr17	4457904	4459116	OCR_63889	MYBBP1A	-	ENSG00000132382.10	rs12603519	0.07028	4458790	3.27647	5.14607	0.000319818	rs71368508	0.939489	ALG
chr17	5184984	5186435	OCR_63958	RABEP1	+	ENSG00000029725.12	rs72634016	3.7e-06	5185204	21.4143	44674.3	0.0100638	rs72634030	0.914308	RA
chr17	5184984	5186435	OCR_63958	RABEP1	+	ENSG00000029725.12	chr17:5185402	5.1e-06	5185402	20.7994	32849.1	0.00739993	rs72634030	0.930422	RA
chr17	38023778	38024701	OCR_65824	ZPBP2	+	ENSG00000186075.8	rs11557466	1.78567e-08	38024626	31.7147	7.7047e+06	0.0344606	rs12453507	0.315348	T1D
chr17	38082690	38084430	OCR_65828	ORMDL3	-	ENSG00000172057.5	rs12603332	1.001e-20	38082807	87.1598	8.44308e+18	0.0949547	rs921650	0.319622	ALG
chr17	38082690	38084430	OCR_65828	ORMDL3	-	ENSG00000172057.5	rs12603332	1.001e-20	38082807	87.1598	8.44308e+18	0.0952597	rs11652139	0.320648	ALG
chr17	38082690	38084430	OCR_65828	RP11-387H17.4	+	ENSG00000264968.1	rs12603332	1.001e-20	38082807	87.1598	8.44308e+18	0.0949547	rs921650	0.319622	ALG
chr17	38082690	38084430	OCR_65828	RP11-387H17.4	+	ENSG00000264968.1	rs12603332	1.001e-20	38082807	87.1598	8.44308e+18	0.0952597	rs11652139	0.320648	ALG
chr17	38804236	38805139	OCR_65948	SMARCE1	-	ENSG00000073584.14	rs3752026	4.22491e-06	38804561	21.16	39340.1	0.0067856	rs757411	0.849699	T1D
chr17	40418636	40419464	OCR_66046	RP11-358B23.5	+	ENSG00000267758.1	rs34129849	1.901e-06	40418956	22.6926	84651	0.0199331	rs7207591	0.539138	ALG
chr17	40425881	40426076	OCR_66050	AC003104.1	-	ENSG00000236194.2	rs7219855	2.918e-06	40426067	21.8697	56098.7	0.0132098	rs7207591	0.842606	ALG
chr17	40427416	40428972	OCR_66051	STAT5B	-	ENSG00000173757.5	rs4029774	3.184e-06	40428961	21.7024	51594.9	0.0121493	rs7207591	0.892499	ALG
chr17	40539686	40540118	OCR_66074	STAT3	-	ENSG00000168610.10	rs3736164	1.179e-10	40539825	41.4995	1.02685e+09	0.00405086	rs12942547	0.948286	CRO
chr17	40539686	40540118	OCR_66074	STAT3	-	ENSG00000168610.10	rs3736164	1.294e-09	40539825	36.8223	9.90527e+07	0.00852697	rs12942547	0.868441	UC
chr17	47438379	47440044	OCR_66642	RP11-1079K10.3	+	ENSG00000248714.2	rs112502960	6.962e-11	47439302	42.5296	1.71866e+09	0.0501793	rs9889262	0.7019	ALG
chr17	47438379	47440044	OCR_66642	ZNF652	-	ENSG00000198740.4	rs112502960	6.962e-11	47439302	42.5296	1.71866e+09	0.0501793	rs9889262	0.7019	ALG
chr17	54910413	54912517	OCR_67298	C17orf67	-	ENSG00000214226.4	rs6503770	1.51e-06	54911403	23.1352	105620	0.0596631	rs3853824	0.0596631	CRO
chr17	54910413	54912517	OCR_67298	C17orf67	-	ENSG00000214226.4	rs2235092	2.07e-06	54911929	22.529	78001	0.0440614	rs3853824	0.247278	CRO
chr17	54910413	54912517	OCR_67298	DGKE	+	ENSG00000153933.5	rs6503770	1.51e-06	54911403	23.1352	105620	0.0596631	rs3853824	0.0596631	CRO
chr17	54910413	54912517	OCR_67298	DGKE	+	ENSG00000153933.5	rs2235092	2.07e-06	54911929	22.529	78001	0.0440614	rs3853824	0.247278	CRO
chr17	54947139	54948134	OCR_67300	RNU6-1158P	+	ENSG00000212469.1	rs74390925	7.281e-05	54947869	15.7364	2612.84	0.00147595	rs3853824	0.950937	CRO
chr17	54947139	54948134	OCR_67300	RNU6-1158P	+	ENSG00000212469.1	rs4794673	4.427e-05	54947988	16.6789	4185.85	0.00236451	rs3853824	0.923621	CRO
chr17	73340800	73341128	OCR_68765	RP11-16C1.3	+	ENSG00000265987.1	rs111769401	0.000431526	73341077	12.3905	490.412	0.00246302	rs930297	0.660249	SLE
chr17	73340800	73341128	OCR_68765	RP11-16C1.3	+	ENSG00000265987.1	rs9911119	0.000437139	73341116	12.3664	484.53	0.00243349	rs930297	0.665129	SLE
chr17	73400315	73401003	OCR_68775	MIR3678	+	ENSG00000264511.1	rs76409794	0.000545878	73400520	11.952	393.868	0.00197815	rs930297	0.74187	SLE
chr17	73400315	73401003	OCR_68775	MIR3678	+	ENSG00000264511.1	rs12943902	0.000694485	73400627	11.5039	314.812	0.0015811	rs930297	0.827	SLE
chr17	73401078	73402354	OCR_68776	GRB2	-	ENSG00000177885.9	rs56007395	0.000525033	73401773	12.0246	408.419	0.00205123	rs930297	0.725916	SLE
chr17	73401078	73402354	OCR_68776	MIR3678	+	ENSG00000264511.1	rs56007395	0.000525033	73401773	12.0246	408.419	0.00205123	rs930297	0.725916	SLE
chr17	73452229	73453639	OCR_68780	KIAA0195	+	ENSG00000177728.10	rs79869968	0.00153769	73452472	10.0329	150.875	0.000757747	rs930297	0.945106	SLE
chr17	73452229	73453639	OCR_68780	KIAA0195	+	ENSG00000177728.10	rs78541128	0.00154103	73453260	10.0289	150.573	0.000756234	rs930297	0.945862	SLE
chr17	76164256	76165536	OCR_69054	SYNGR2	+	ENSG00000108639.3	rs9908045	7.63e-05	76165104	15.6478	2499.68	0.00801111	rs870355	0.794704	VIT
chr17	76164256	76165536	OCR_69054	SYNGR2	+	ENSG00000108639.3	rs9908349	1.91e-05	76165368	18.277	9306.77	0.0298269	rs870355	0.735237	VIT
chr17	76165694	76165986	OCR_69055	SYNGR2	+	ENSG00000108639.3	rs3829575	7.95e-06	76165863	19.9499	21481.1	0.0688438	rs870355	0.475028	VIT
chr17	76182535	76183705	OCR_69058	TK1	-	ENSG00000167900.7	rs1071664	5.74e-05	76183043	16.1866	3272.4	0.0104876	rs870355	0.776839	VIT
chr17	76182535	76183705	OCR_69058	AFMID	+	ENSG00000183077.11	rs1071664	5.74e-05	76183043	16.1866	3272.4	0.0104876	rs870355	0.776839	VIT
chr18	12775466	12776608	OCR_70001	RP11-973H7.1	-	ENSG00000260302.1	rs2847260	9.519e-16	12775591	64.5276	102798883785518	0.02789	rs80262450	0.654546	IBD
chr18	12775466	12776608	OCR_70001	RP11-973H7.1	-	ENSG00000260302.1	rs2847260	6.23e-05	12775591	16.0314	3028.16	0.068119	rs2847293	0.418333	JIA
chr18	12775466	12776608	OCR_70001	RP11-973H7.1	-	ENSG00000260302.1	rs2847260	9.18925e-15	12775591	60.0625	1.10257e+13	0.0158793	rs1893217	0.820523	T1D
chr18	12775466	12776608	OCR_70001	RP11-973H7.1	-	ENSG00000260302.1	rs2847260	9.18925e-15	12775591	60.0625	1.10257e+13	0.0158793	rs12971201	0.820523	T1D
chr18	12775466	12776608	OCR_70001	RP11-973H7.1	-	ENSG00000260302.1	rs2847260	3.418e-06	12775591	21.5663	48202.4	0.0237678	rs80262450	0.462013	UC
chr18	12775466	12776608	OCR_70001	RP11-973H7.1	-	ENSG00000260302.1	rs2542147	7.41e-16	12775851	65.0211	131569308080652	0.0356956	rs80262450	0.594262	IBD
chr18	12775466	12776608	OCR_70001	RP11-973H7.1	-	ENSG00000260302.1	rs2542147	2.75e-06	12775851	21.9835	59383.1	0.0292808	rs80262450	0.18038	UC
chr19	1020777	1021952	OCR_73963	TMEM259	-	ENSG00000182087.8	rs544368432	0.0394768	1021755	4.24023	8.3321	0.00117901	rs7249065	0.403994	SLE
chr19	1020777	1021952	OCR_73963	TMEM259	-	ENSG00000182087.8	rs56100000	0.103405	1021182	2.65223	3.76638	0.000532949	rs7249065	0.514345	SLE
chr19	1020777	1021952	OCR_73963	TMEM259	-	ENSG00000182087.8	rs118187422	0.239701	1021519	1.38235	1.99606	0.000282446	rs7249065	0.621911	SLE
chr19	1020777	1021952	OCR_73963	TMEM259	-	ENSG00000182087.8	rs571836101	0.316277	1021616	1.00428	1.65225	0.000233797	rs7249065	0.663399	SLE
chr19	1020777	1021952	OCR_73963	TMEM259	-	ENSG00000182087.8	rs373777090	0.380827	1021091	0.768031	1.46817	0.000207748	rs7249065	0.693932	SLE
chr19	1020777	1021952	OCR_73963	TMEM259	-	ENSG00000182087.8	rs2107367	0.386651	1021327	0.749448	1.45459	0.000205827	rs7249065	0.697239	SLE
chr19	1020777	1021952	OCR_73963	TMEM259	-	ENSG00000182087.8	rs572960308	0.405006	1021622	0.693413	1.4144	0.00020014	rs7249065	0.707183	SLE
chr19	1020777	1021952	OCR_73963	TMEM259	-	ENSG00000182087.8	rs1985546	0.41375	1021511	0.667999	1.39654	0.000197613	rs7249065	0.71056	SLE
chr19	1020777	1021952	OCR_73963	TMEM259	-	ENSG00000182087.8	rs189615340	0.416865	1021514	0.659136	1.39037	0.000196739	rs7249065	0.712136	SLE
chr19	1020777	1021952	OCR_73963	TMEM259	-	ENSG00000182087.8	rs8100672	0.504829	1021637	0.44477	1.24905	0.000176743	rs7249065	0.75299	SLE
chr19	1020777	1021952	OCR_73963	TMEM259	-	ENSG00000182087.8	rs10417845	0.536606	1021784	0.381867	1.21038	0.000171271	rs7249065	0.766226	SLE
chr19	1020777	1021952	OCR_73963	TMEM259	-	ENSG00000182087.8	rs8105552	0.598512	1021512	0.277246	1.14869	0.000162542	rs7249065	0.788216	SLE
chr19	1020777	1021952	OCR_73963	TMEM259	-	ENSG00000182087.8	rs576869604	0.660583	1021753	0.192816	1.10121	0.000155823	rs7249065	0.812418	SLE
chr19	1020777	1021952	OCR_73963	TMEM259	-	ENSG00000182087.8	rs1005505	0.691605	1021249	0.157353	1.08185	0.000153084	rs7249065	0.822456	SLE
chr19	1020777	1021952	OCR_73963	TMEM259	-	ENSG00000182087.8	rs527552577	0.698486	1021569	0.150052	1.07791	0.000152526	rs7249065	0.82597	SLE
chr19	1020777	1021952	OCR_73963	TMEM259	-	ENSG00000182087.8	rs7251792	0.715909	1021725	0.132446	1.06847	0.00015119	rs7249065	0.831894	SLE
chr19	1020777	1021952	OCR_73963	TMEM259	-	ENSG00000182087.8	rs34277975	0.718039	1021304	0.130379	1.06736	0.000151034	rs7249065	0.833254	SLE
chr19	1020777	1021952	OCR_73963	TMEM259	-	ENSG00000182087.8	rs200937464	0.718585	1021235	0.129853	1.06708	0.000150994	rs7249065	0.833707	SLE
chr19	1020777	1021952	OCR_73963	TMEM259	-	ENSG00000182087.8	rs35228155	0.723204	1021634	0.125443	1.06473	0.000150661	rs7249065	0.835516	SLE
chr19	1020777	1021952	OCR_73963	TMEM259	-	ENSG00000182087.8	rs60583377	0.725773	1021349	0.123028	1.06345	0.000150479	rs7249065	0.835968	SLE
chr19	1020777	1021952	OCR_73963	TMEM259	-	ENSG00000182087.8	rs11879272	0.759462	1021840	0.0937507	1.04799	0.000148293	rs7249065	0.849558	SLE
chr19	1020777	1021952	OCR_73963	TMEM259	-	ENSG00000182087.8	rs117481827	0.777052	1021627	0.0801812	1.04091	0.00014729	rs7249065	0.855764	SLE
chr19	1020777	1021952	OCR_73963	TMEM259	-	ENSG00000182087.8	rs6510991	0.795815	1021902	0.0669604	1.03405	0.000146319	rs7249065	0.861783	SLE
chr19	1020777	1021952	OCR_73963	TMEM259	-	ENSG00000182087.8	19:1021504	0.815121	1021504	0.054674	1.02771	0.000145423	rs7249065	0.86849	SLE
chr19	1020777	1021952	OCR_73963	TMEM259	-	ENSG00000182087.8	rs73920544	0.817638	1021237	0.053169	1.02694	0.000145314	rs7249065	0.869071	SLE
chr19	1020777	1021952	OCR_73963	TMEM259	-	ENSG00000182087.8	rs74806805	0.857964	1021620	0.032029	1.01614	0.000143786	rs7249065	0.891603	SLE
chr19	1020777	1021952	OCR_73963	TMEM259	-	ENSG00000182087.8	rs549163776	0.877916	1020922	0.0235965	1.01187	0.000143181	rs7249065	0.907812	SLE
chr19	1020777	1021952	OCR_73963	TMEM259	-	ENSG00000182087.8	rs78560766	0.881338	1021952	0.0222825	1.0112	0.000143087	rs7249065	0.91139	SLE
chr19	1020777	1021952	OCR_73963	TMEM259	-	ENSG00000182087.8	rs145893237	0.889782	1021518	0.0192044	1.00965	0.000142867	rs7249065	0.919825	SLE
chr19	1020777	1021952	OCR_73963	TMEM259	-	ENSG00000182087.8	rs138975468	0.893695	1021671	0.017857	1.00897	0.000142771	rs7249065	0.92411	SLE
chr19	1020777	1021952	OCR_73963	TMEM259	-	ENSG00000182087.8	rs189128623	0.896634	1021262	0.0168778	1.00847	0.000142701	rs7249065	0.927821	SLE
chr19	1020777	1021952	OCR_73963	TMEM259	-	ENSG00000182087.8	rs10411240	0.90419	1021239	0.014489	1.00727	0.000142531	rs7249065	0.940372	SLE
chr19	1020777	1021952	OCR_73963	TMEM259	-	ENSG00000182087.8	rs142094324	0.906398	1021515	0.0138258	1.00694	0.000142483	rs7249065	0.942652	SLE
chr19	1020777	1021952	OCR_73963	RNU6-2	+	ENSG00000207357.1	rs544368432	0.0394768	1021755	4.24023	8.3321	0.00117901	rs7249065	0.403994	SLE
chr19	1020777	1021952	OCR_73963	RNU6-2	+	ENSG00000207357.1	rs56100000	0.103405	1021182	2.65223	3.76638	0.000532949	rs7249065	0.514345	SLE
chr19	1020777	1021952	OCR_73963	RNU6-2	+	ENSG00000207357.1	rs118187422	0.239701	1021519	1.38235	1.99606	0.000282446	rs7249065	0.621911	SLE
chr19	1020777	1021952	OCR_73963	RNU6-2	+	ENSG00000207357.1	rs571836101	0.316277	1021616	1.00428	1.65225	0.000233797	rs7249065	0.663399	SLE
chr19	1020777	1021952	OCR_73963	RNU6-2	+	ENSG00000207357.1	rs373777090	0.380827	1021091	0.768031	1.46817	0.000207748	rs7249065	0.693932	SLE
chr19	1020777	1021952	OCR_73963	RNU6-2	+	ENSG00000207357.1	rs2107367	0.386651	1021327	0.749448	1.45459	0.000205827	rs7249065	0.697239	SLE
chr19	1020777	1021952	OCR_73963	RNU6-2	+	ENSG00000207357.1	rs572960308	0.405006	1021622	0.693413	1.4144	0.00020014	rs7249065	0.707183	SLE
chr19	1020777	1021952	OCR_73963	RNU6-2	+	ENSG00000207357.1	rs1985546	0.41375	1021511	0.667999	1.39654	0.000197613	rs7249065	0.71056	SLE
chr19	1020777	1021952	OCR_73963	RNU6-2	+	ENSG00000207357.1	rs189615340	0.416865	1021514	0.659136	1.39037	0.000196739	rs7249065	0.712136	SLE
chr19	1020777	1021952	OCR_73963	RNU6-2	+	ENSG00000207357.1	rs8100672	0.504829	1021637	0.44477	1.24905	0.000176743	rs7249065	0.75299	SLE
chr19	1020777	1021952	OCR_73963	RNU6-2	+	ENSG00000207357.1	rs10417845	0.536606	1021784	0.381867	1.21038	0.000171271	rs7249065	0.766226	SLE
chr19	1020777	1021952	OCR_73963	RNU6-2	+	ENSG00000207357.1	rs8105552	0.598512	1021512	0.277246	1.14869	0.000162542	rs7249065	0.788216	SLE
chr19	1020777	1021952	OCR_73963	RNU6-2	+	ENSG00000207357.1	rs576869604	0.660583	1021753	0.192816	1.10121	0.000155823	rs7249065	0.812418	SLE
chr19	1020777	1021952	OCR_73963	RNU6-2	+	ENSG00000207357.1	rs1005505	0.691605	1021249	0.157353	1.08185	0.000153084	rs7249065	0.822456	SLE
chr19	1020777	1021952	OCR_73963	RNU6-2	+	ENSG00000207357.1	rs527552577	0.698486	1021569	0.150052	1.07791	0.000152526	rs7249065	0.82597	SLE
chr19	1020777	1021952	OCR_73963	RNU6-2	+	ENSG00000207357.1	rs7251792	0.715909	1021725	0.132446	1.06847	0.00015119	rs7249065	0.831894	SLE
chr19	1020777	1021952	OCR_73963	RNU6-2	+	ENSG00000207357.1	rs34277975	0.718039	1021304	0.130379	1.06736	0.000151034	rs7249065	0.833254	SLE
chr19	1020777	1021952	OCR_73963	RNU6-2	+	ENSG00000207357.1	rs200937464	0.718585	1021235	0.129853	1.06708	0.000150994	rs7249065	0.833707	SLE
chr19	1020777	1021952	OCR_73963	RNU6-2	+	ENSG00000207357.1	rs35228155	0.723204	1021634	0.125443	1.06473	0.000150661	rs7249065	0.835516	SLE
chr19	1020777	1021952	OCR_73963	RNU6-2	+	ENSG00000207357.1	rs60583377	0.725773	1021349	0.123028	1.06345	0.000150479	rs7249065	0.835968	SLE
chr19	1020777	1021952	OCR_73963	RNU6-2	+	ENSG00000207357.1	rs11879272	0.759462	1021840	0.0937507	1.04799	0.000148293	rs7249065	0.849558	SLE
chr19	1020777	1021952	OCR_73963	RNU6-2	+	ENSG00000207357.1	rs117481827	0.777052	1021627	0.0801812	1.04091	0.00014729	rs7249065	0.855764	SLE
chr19	1020777	1021952	OCR_73963	RNU6-2	+	ENSG00000207357.1	rs6510991	0.795815	1021902	0.0669604	1.03405	0.000146319	rs7249065	0.861783	SLE
chr19	1020777	1021952	OCR_73963	RNU6-2	+	ENSG00000207357.1	19:1021504	0.815121	1021504	0.054674	1.02771	0.000145423	rs7249065	0.86849	SLE
chr19	1020777	1021952	OCR_73963	RNU6-2	+	ENSG00000207357.1	rs73920544	0.817638	1021237	0.053169	1.02694	0.000145314	rs7249065	0.869071	SLE
chr19	1020777	1021952	OCR_73963	RNU6-2	+	ENSG00000207357.1	rs74806805	0.857964	1021620	0.032029	1.01614	0.000143786	rs7249065	0.891603	SLE
chr19	1020777	1021952	OCR_73963	RNU6-2	+	ENSG00000207357.1	rs549163776	0.877916	1020922	0.0235965	1.01187	0.000143181	rs7249065	0.907812	SLE
chr19	1020777	1021952	OCR_73963	RNU6-2	+	ENSG00000207357.1	rs78560766	0.881338	1021952	0.0222825	1.0112	0.000143087	rs7249065	0.91139	SLE
chr19	1020777	1021952	OCR_73963	RNU6-2	+	ENSG00000207357.1	rs145893237	0.889782	1021518	0.0192044	1.00965	0.000142867	rs7249065	0.919825	SLE
chr19	1020777	1021952	OCR_73963	RNU6-2	+	ENSG00000207357.1	rs138975468	0.893695	1021671	0.017857	1.00897	0.000142771	rs7249065	0.92411	SLE
chr19	1020777	1021952	OCR_73963	RNU6-2	+	ENSG00000207357.1	rs189128623	0.896634	1021262	0.0168778	1.00847	0.000142701	rs7249065	0.927821	SLE
chr19	1020777	1021952	OCR_73963	RNU6-2	+	ENSG00000207357.1	rs10411240	0.90419	1021239	0.014489	1.00727	0.000142531	rs7249065	0.940372	SLE
chr19	1020777	1021952	OCR_73963	RNU6-2	+	ENSG00000207357.1	rs142094324	0.906398	1021515	0.0138258	1.00694	0.000142483	rs7249065	0.942652	SLE
chr19	1026207	1026924	OCR_73964	CNN2	+	ENSG00000064666.10	rs140606971	0.0399294	1026314	4.22088	8.25188	0.00116766	rs7249065	0.405162	SLE
chr19	1026207	1026924	OCR_73964	CNN2	+	ENSG00000064666.10	rs10422209	0.371794	1026318	0.79766	1.49008	0.000210849	rs7249065	0.690582	SLE
chr19	1026207	1026924	OCR_73964	CNN2	+	ENSG00000064666.10	rs4807440	0.603521	1026477	0.269718	1.14438	0.000161931	rs7249065	0.790487	SLE
chr19	1026207	1026924	OCR_73964	CNN2	+	ENSG00000064666.10	rs559497987	0.607856	1026346	0.263309	1.14071	0.000161413	rs7249065	0.793236	SLE
chr19	1026207	1026924	OCR_73964	CNN2	+	ENSG00000064666.10	rs573115850	0.732936	1026625	0.116433	1.05994	0.000149984	rs7249065	0.838372	SLE
chr19	1026207	1026924	OCR_73964	CNN2	+	ENSG00000064666.10	rs147767045	0.836318	1026844	0.0426858	1.02157	0.000144554	rs7249065	0.878344	SLE
chr19	1026207	1026924	OCR_73964	CNN2	+	ENSG00000064666.10	rs549109689	0.896255	1026896	0.0170025	1.00854	0.00014271	rs7249065	0.927393	SLE
chr19	1026207	1026924	OCR_73964	CNN2	+	ENSG00000064666.10	rs4807440	0.07436	1026477	3.18405	4.9137	0.000486327	rs2024092	0.878479	UC
chr19	1026207	1026924	OCR_73964	CNN2	+	ENSG00000064666.10	rs147767045	0.2082	1026844	1.5839	2.2077	0.000218504	rs2024092	0.92803	UC
chr19	1027160	1027657	OCR_73965	CNN2	+	ENSG00000064666.10	19:1027421	0.445626	1027421	0.581753	1.3376	0.000189273	rs7249065	0.727744	SLE
chr19	1027160	1027657	OCR_73965	CNN2	+	ENSG00000064666.10	rs12980170	0.701311	1027286	0.147112	1.07633	0.000152302	rs7249065	0.827647	SLE
chr19	1027160	1027657	OCR_73965	CNN2	+	ENSG00000064666.10	rs12980370	0.714478	1027343	0.133845	1.06921	0.000151295	rs7249065	0.831591	SLE
chr19	1027160	1027657	OCR_73965	CNN2	+	ENSG00000064666.10	rs34697645	0.715738	1027610	0.132613	1.06855	0.000151202	rs7249065	0.831743	SLE
chr19	1027160	1027657	OCR_73965	CNN2	+	ENSG00000064666.10	rs561297473	0.729718	1027388	0.119371	1.0615	0.000150204	rs7249065	0.837622	SLE
chr19	1027160	1027657	OCR_73965	CNN2	+	ENSG00000064666.10	rs139106846	0.831946	1027640	0.0450316	1.02277	0.000144724	rs7249065	0.875741	SLE
chr19	1027160	1027657	OCR_73965	CNN2	+	ENSG00000064666.10	rs12980170	0.1479	1027286	2.09378	2.84877	0.000281953	rs2024092	0.906641	UC
chr19	1030463	1031073	OCR_73969	CNN2	+	ENSG00000064666.10	rs550175103	0.0255777	1030981	4.98434	12.0875	0.0017104	rs7249065	0.359537	SLE
chr19	1030463	1031073	OCR_73969	CNN2	+	ENSG00000064666.10	rs576164136	0.213581	1030739	1.54699	2.16732	0.00030668	rs7249065	0.603118	SLE
chr19	1030463	1031073	OCR_73969	CNN2	+	ENSG00000064666.10	rs547254266	0.21415	1030542	1.54315	2.16317	0.000306092	rs7249065	0.603731	SLE
chr19	1030463	1031073	OCR_73969	CNN2	+	ENSG00000064666.10	rs529019605	0.256445	1030539	1.28785	1.90394	0.00026941	rs7249065	0.632402	SLE
chr19	1030463	1031073	OCR_73969	CNN2	+	ENSG00000064666.10	rs528084875	0.348908	1030877	0.877425	1.55071	0.000219428	rs7249065	0.679181	SLE
chr19	1030463	1031073	OCR_73969	CNN2	+	ENSG00000064666.10	rs201917431	0.364924	1031039	0.820877	1.50748	0.000213311	rs7249065	0.686766	SLE
chr19	1030463	1031073	OCR_73969	CNN2	+	ENSG00000064666.10	rs559607002	0.442347	1030570	0.590187	1.34325	0.000190072	rs7249065	0.724901	SLE
chr19	1030463	1031073	OCR_73969	CNN2	+	ENSG00000064666.10	rs7255427	0.633975	1030477	0.226709	1.12003	0.000158486	rs7249065	0.802043	SLE
chr19	1030463	1031073	OCR_73969	CNN2	+	ENSG00000064666.10	rs10419072	0.687704	1030766	0.161582	1.08414	0.000153408	rs7249065	0.821537	SLE
chr19	1030463	1031073	OCR_73969	CNN2	+	ENSG00000064666.10	rs369217986	0.789497	1030908	0.0712697	1.03628	0.000146635	rs7249065	0.859879	SLE
chr19	1030463	1031073	OCR_73969	CNN2	+	ENSG00000064666.10	rs561418585	0.854993	1030517	0.0333981	1.01684	0.000143885	rs7249065	0.88887	SLE
chr19	1030463	1031073	OCR_73969	CNN2	+	ENSG00000064666.10	rs7256075	0.900033	1030956	0.0157803	1.00792	0.000142623	rs7249065	0.934241	SLE
chr19	1030463	1031073	OCR_73969	CNN2	+	ENSG00000064666.10	rs530858703	0.901138	1030979	0.0154316	1.00775	0.000142598	rs7249065	0.936665	SLE
chr19	1030463	1031073	OCR_73969	CNN2	+	ENSG00000064666.10	rs7252428	0.1217	1030650	2.39531	3.31233	0.000327834	rs2024092	0.896252	UC
chr19	1030463	1031073	OCR_73969	CNN2	+	ENSG00000064666.10	rs201917431	0.3361	1031039	0.925251	1.58824	0.000157194	rs2024092	0.950064	UC
chr19	1039751	1040282	OCR_73970	AC011558.5	-	ENSG00000267020.1	rs3764642	0.228854	1040046	1.44797	2.06264	0.000291867	rs7249065	0.61387	SLE
chr19	1039751	1040282	OCR_73970	AC011558.5	-	ENSG00000267020.1	rs184510773	0.595365	1039843	0.282043	1.15145	0.000162932	rs7249065	0.786589	SLE
chr19	1039751	1040282	OCR_73970	AC011558.5	-	ENSG00000267020.1	rs149603637	0.628503	1039923	0.234096	1.12417	0.000159073	rs7249065	0.800456	SLE
chr19	1039751	1040282	OCR_73970	AC011558.5	-	ENSG00000267020.1	rs539496276	0.878807	1039911	0.0232507	1.01169	0.000143156	rs7249065	0.908528	SLE
chr19	1039751	1040282	OCR_73970	AC011558.5	-	ENSG00000267020.1	rs114557702	0.907949	1040018	0.0133694	1.00671	0.000142451	rs7249065	0.945074	SLE
chr19	1039751	1040282	OCR_73970	AC011558.5	-	ENSG00000267020.1	rs3764642	0.332	1040046	0.941081	1.60086	0.000158443	rs2024092	0.94975	UC
chr19	1039751	1040282	OCR_73970	ABCA7	+	ENSG00000064687.8	rs3764642	0.228854	1040046	1.44797	2.06264	0.000291867	rs7249065	0.61387	SLE
chr19	1039751	1040282	OCR_73970	ABCA7	+	ENSG00000064687.8	rs184510773	0.595365	1039843	0.282043	1.15145	0.000162932	rs7249065	0.786589	SLE
chr19	1039751	1040282	OCR_73970	ABCA7	+	ENSG00000064687.8	rs149603637	0.628503	1039923	0.234096	1.12417	0.000159073	rs7249065	0.800456	SLE
chr19	1039751	1040282	OCR_73970	ABCA7	+	ENSG00000064687.8	rs539496276	0.878807	1039911	0.0232507	1.01169	0.000143156	rs7249065	0.908528	SLE
chr19	1039751	1040282	OCR_73970	ABCA7	+	ENSG00000064687.8	rs114557702	0.907949	1040018	0.0133694	1.00671	0.000142451	rs7249065	0.945074	SLE
chr19	1039751	1040282	OCR_73970	ABCA7	+	ENSG00000064687.8	rs3764642	0.332	1040046	0.941081	1.60086	0.000158443	rs2024092	0.94975	UC
chr19	1040635	1041250	OCR_73971	ABCA7	+	ENSG00000064687.8	rs4147904	0.3589	1040765	0.841739	1.52329	0.000215548	rs7249065	0.684406	SLE
chr19	1040635	1041250	OCR_73971	ABCA7	+	ENSG00000064687.8	rs10406449	0.60902	1040773	0.261604	1.13974	0.000161276	rs7249065	0.794204	SLE
chr19	1040635	1041250	OCR_73971	ABCA7	+	ENSG00000064687.8	rs566051356	0.693223	1041076	0.155618	1.08092	0.000152952	rs7249065	0.823221	SLE
chr19	1040635	1041250	OCR_73971	ABCA7	+	ENSG00000064687.8	rs3752228	0.698912	1041164	0.149606	1.07767	0.000152492	rs7249065	0.826428	SLE
chr19	1040635	1041250	OCR_73971	ABCA7	+	ENSG00000064687.8	rs552320457	0.721607	1040976	0.126958	1.06554	0.000150775	rs7249065	0.834763	SLE
chr19	1040635	1041250	OCR_73971	ABCA7	+	ENSG00000064687.8	rs571663276	0.740955	1040726	0.109289	1.05617	0.000149449	rs7249065	0.842416	SLE
chr19	1040635	1041250	OCR_73971	ABCA7	+	ENSG00000064687.8	rs10406449	0.1881	1040773	1.73244	2.3779	0.00023535	rs2024092	0.92149	UC
chr19	1040635	1041250	OCR_73971	ABCA7	+	ENSG00000064687.8	rs3752228	0.2096	1041164	1.57419	2.197	0.000217445	rs2024092	0.928684	UC
chr19	1040635	1041250	OCR_73971	ABCA7	+	ENSG00000064687.8	rs4147904	0.2578	1040765	1.28053	1.89699	0.000187752	rs2024092	0.940218	UC
chr19	1045282	1045527	OCR_73972	ABCA7	+	ENSG00000064687.8	rs144288935	0.81899	1045449	0.0523697	1.02653	0.000145256	rs7249065	0.869507	SLE
chr19	1057144	1057695	OCR_73973	ABCA7	+	ENSG00000064687.8	rs117187003	0.140059	1057343	2.17731	2.97028	0.0004203	rs7249065	0.54267	SLE
chr19	1057144	1057695	OCR_73973	ABCA7	+	ENSG00000064687.8	rs550858539	0.500822	1057144	0.453194	1.25432	0.000177489	rs7249065	0.751043	SLE
chr19	1057144	1057695	OCR_73973	ABCA7	+	ENSG00000064687.8	rs74567454	0.661564	1057634	0.191629	1.10056	0.00015573	rs7249065	0.812729	SLE
chr19	1057144	1057695	OCR_73973	ABCA7	+	ENSG00000064687.8	rs575111399	0.709828	1057342	0.138449	1.07168	0.000151644	rs7249065	0.829925	SLE
chr19	1057144	1057695	OCR_73973	ABCA7	+	ENSG00000064687.8	rs192505421	0.847418	1057261	0.0370231	1.01868	0.000144146	rs7249065	0.884406	SLE
chr19	1057144	1057695	OCR_73973	ABCA7	+	ENSG00000064687.8	rs538200140	0.897164	1057670	0.0167042	1.00839	0.000142689	rs7249065	0.929248	SLE
chr19	1064781	1065233	OCR_73975	ABCA7	+	ENSG00000064687.8	rs565880304	0.157606	1064800	1.99705	2.71427	0.000384074	rs7249065	0.559883	SLE
chr19	1064781	1065233	OCR_73975	ABCA7	+	ENSG00000064687.8	rs531365316	0.513311	1065113	0.427312	1.2382	0.000175207	rs7249065	0.757213	SLE
chr19	1064781	1065233	OCR_73975	ABCA7	+	ENSG00000064687.8	rs4147936	0.579794	1065197	0.306568	1.16566	0.000164942	rs7249065	0.780851	SLE
chr19	1064781	1065233	OCR_73975	ABCA7	+	ENSG00000064687.8	rs4147934	0.598925	1065018	0.27662	1.14833	0.000162491	rs7249065	0.788703	SLE
chr19	1064781	1065233	OCR_73975	ABCA7	+	ENSG00000064687.8	rs28721316	0.835981	1064828	0.0428643	1.02166	0.000144567	rs7249065	0.87791	SLE
chr19	1064781	1065233	OCR_73975	ABCA7	+	ENSG00000064687.8	rs11666702	0.854181	1064899	0.0337775	1.01703	0.000143912	rs7249065	0.88815	SLE
chr19	1064781	1065233	OCR_73975	ABCA7	+	ENSG00000064687.8	rs556266958	0.907746	1064907	0.0134287	1.00674	0.000142455	rs7249065	0.944647	SLE
chr19	1064781	1065233	OCR_73975	ABCA7	+	ENSG00000064687.8	rs200178682	0.908936	1065227	0.0130829	1.00656	0.00014243	rs7249065	0.947495	SLE
chr19	1064781	1065233	OCR_73975	ABCA7	+	ENSG00000064687.8	rs4147934	0.08202	1065018	3.02441	4.53673	0.000449017	rs2024092	0.88171	UC
chr19	1064781	1065233	OCR_73975	ABCA7	+	ENSG00000064687.8	rs4147936	0.1067	1065197	2.60243	3.67376	0.000363605	rs2024092	0.889308	UC
chr19	1064781	1065233	OCR_73975	HMHA1	+	ENSG00000180448.6	rs565880304	0.157606	1064800	1.99705	2.71427	0.000384074	rs7249065	0.559883	SLE
chr19	1064781	1065233	OCR_73975	HMHA1	+	ENSG00000180448.6	rs531365316	0.513311	1065113	0.427312	1.2382	0.000175207	rs7249065	0.757213	SLE
chr19	1064781	1065233	OCR_73975	HMHA1	+	ENSG00000180448.6	rs4147936	0.579794	1065197	0.306568	1.16566	0.000164942	rs7249065	0.780851	SLE
chr19	1064781	1065233	OCR_73975	HMHA1	+	ENSG00000180448.6	rs4147934	0.598925	1065018	0.27662	1.14833	0.000162491	rs7249065	0.788703	SLE
chr19	1064781	1065233	OCR_73975	HMHA1	+	ENSG00000180448.6	rs28721316	0.835981	1064828	0.0428643	1.02166	0.000144567	rs7249065	0.87791	SLE
chr19	1064781	1065233	OCR_73975	HMHA1	+	ENSG00000180448.6	rs11666702	0.854181	1064899	0.0337775	1.01703	0.000143912	rs7249065	0.88815	SLE
chr19	1064781	1065233	OCR_73975	HMHA1	+	ENSG00000180448.6	rs556266958	0.907746	1064907	0.0134287	1.00674	0.000142455	rs7249065	0.944647	SLE
chr19	1064781	1065233	OCR_73975	HMHA1	+	ENSG00000180448.6	rs200178682	0.908936	1065227	0.0130829	1.00656	0.00014243	rs7249065	0.947495	SLE
chr19	1064781	1065233	OCR_73975	HMHA1	+	ENSG00000180448.6	rs4147934	0.08202	1065018	3.02441	4.53673	0.000449017	rs2024092	0.88171	UC
chr19	1064781	1065233	OCR_73975	HMHA1	+	ENSG00000180448.6	rs4147936	0.1067	1065197	2.60243	3.67376	0.000363605	rs2024092	0.889308	UC
chr19	1066817	1068484	OCR_73976	HMHA1	+	ENSG00000180448.6	rs76139012	0.024235	1067422	5.07774	12.6653	0.00179217	rs7249065	0.352644	SLE
chr19	1066817	1068484	OCR_73976	HMHA1	+	ENSG00000180448.6	rs28615613	0.109649	1067104	2.55927	3.59533	0.000508746	rs7249065	0.519051	SLE
chr19	1066817	1068484	OCR_73976	HMHA1	+	ENSG00000180448.6	rs549686945	0.133238	1067221	2.25437	3.08695	0.000436809	rs7249065	0.53538	SLE
chr19	1066817	1068484	OCR_73976	HMHA1	+	ENSG00000180448.6	rs113294002	0.189178	1068082	1.72401	2.3679	0.000335062	rs7249065	0.58394	SLE
chr19	1066817	1068484	OCR_73976	HMHA1	+	ENSG00000180448.6	rs150368435	0.201131	1068232	1.63414	2.26386	0.00032034	rs7249065	0.593075	SLE
chr19	1066817	1068484	OCR_73976	HMHA1	+	ENSG00000180448.6	rs537674408	0.259143	1067178	1.27333	1.89017	0.000267462	rs7249065	0.633474	SLE
chr19	1066817	1068484	OCR_73976	HMHA1	+	ENSG00000180448.6	rs79119189	0.266908	1067927	1.23257	1.85203	0.000262066	rs7249065	0.63878	SLE
chr19	1066817	1068484	OCR_73976	HMHA1	+	ENSG00000180448.6	rs905149	0.519105	1066917	0.415671	1.23101	0.00017419	rs7249065	0.759484	SLE
chr19	1066817	1068484	OCR_73976	HMHA1	+	ENSG00000180448.6	rs73505251	0.53722	1068095	0.380717	1.20968	0.000171172	rs7249065	0.766568	SLE
chr19	1066817	1068484	OCR_73976	HMHA1	+	ENSG00000180448.6	rs12981369	0.607662	1066928	0.263594	1.14088	0.000161436	rs7249065	0.793075	SLE
chr19	1066817	1068484	OCR_73976	HMHA1	+	ENSG00000180448.6	rs77131765	0.758784	1066936	0.0942969	1.04828	0.000148333	rs7249065	0.848965	SLE
chr19	1066817	1068484	OCR_73976	HMHA1	+	ENSG00000180448.6	rs552899876	0.765557	1067561	0.0889182	1.04546	0.000147935	rs7249065	0.851187	SLE
chr19	1066817	1068484	OCR_73976	HMHA1	+	ENSG00000180448.6	19:1067800	0.813583	1067800	0.0556046	1.02819	0.000145491	rs7249065	0.867908	SLE
chr19	1066817	1068484	OCR_73976	HMHA1	+	ENSG00000180448.6	rs141322928	0.815046	1067931	0.0547192	1.02774	0.000145427	rs7249065	0.868344	SLE
chr19	1066817	1068484	OCR_73976	HMHA1	+	ENSG00000180448.6	rs11670156	0.844412	1067958	0.0385153	1.01944	0.000144253	rs7249065	0.88282	SLE
chr19	1066817	1068484	OCR_73976	HMHA1	+	ENSG00000180448.6	rs540497687	0.900487	1068448	0.0156365	1.00785	0.000142612	rs7249065	0.935382	SLE
chr19	1066817	1068484	OCR_73976	HMHA1	+	ENSG00000180448.6	rs563115996	0.911271	1066858	0.0124179	1.00623	0.000142383	rs7249065	0.949204	SLE
chr19	1066817	1068484	OCR_73976	HMHA1	+	ENSG00000180448.6	rs79119189	0.08244	1067927	3.01613	4.51798	0.000447161	rs2024092	0.882158	UC
chr19	1066817	1068484	OCR_73976	HMHA1	+	ENSG00000180448.6	rs77131765	0.266	1066936	1.23726	1.85638	0.000183733	rs2024092	0.94133	UC
chr19	1075862	1076161	OCR_73980	HMHA1	+	ENSG00000180448.6	rs34397138	0.43147	1076025	0.618863	1.36265	0.000192817	rs7249065	0.719729	SLE
chr19	1075862	1076161	OCR_73980	HMHA1	+	ENSG00000180448.6	rs2269847	0.479056	1075877	0.501012	1.28467	0.000181784	rs7249065	0.742776	SLE
chr19	1075862	1076161	OCR_73980	HMHA1	+	ENSG00000180448.6	rs2269848	0.49532	1076063	0.464949	1.26172	0.000178535	rs7249065	0.749262	SLE
chr19	1075862	1076161	OCR_73980	HMHA1	+	ENSG00000180448.6	rs527386499	0.807087	1076128	0.0596267	1.03026	0.000145784	rs7249065	0.864995	SLE
chr19	1075862	1076161	OCR_73980	HMHA1	+	ENSG00000180448.6	rs529729803	0.856675	1076084	0.0326194	1.01644	0.000143829	rs7249065	0.890596	SLE
chr19	1075862	1076161	OCR_73980	HMHA1	+	ENSG00000180448.6	rs369890030	0.860857	1075996	0.0307243	1.01548	0.000143692	rs7249065	0.89304	SLE
chr19	1075862	1076161	OCR_73980	HMHA1	+	ENSG00000180448.6	rs757232	0.01473	1075979	5.94848	19.5747	0.00193738	rs2024092	0.765455	UC
chr19	1075862	1076161	OCR_73980	HMHA1	+	ENSG00000180448.6	rs2269848	0.07877	1076063	3.0901	4.6882	0.000464009	rs2024092	0.87989	UC
chr19	1076934	1077369	OCR_73981	HMHA1	+	ENSG00000180448.6	rs150873583	0.482955	1077233	0.492183	1.27902	0.000180983	rs7249065	0.744408	SLE
chr19	1082030	1082824	OCR_73982	HMHA1	+	ENSG00000180448.6	rs111703950	0.0946199	1082572	2.79396	4.04298	0.000572089	rs7249065	0.501205	SLE
chr19	1082030	1082824	OCR_73982	HMHA1	+	ENSG00000180448.6	rs11878877	0.0986537	1082081	2.72717	3.91019	0.000553299	rs7249065	0.505682	SLE
chr19	1082030	1082824	OCR_73982	HMHA1	+	ENSG00000180448.6	rs76508986	0.194452	1082815	1.68356	2.32049	0.000328354	rs7249065	0.586911	SLE
chr19	1082030	1082824	OCR_73982	HMHA1	+	ENSG00000180448.6	rs188956887	0.294483	1082341	1.09901	1.7324	0.000245137	rs7249065	0.650944	SLE
chr19	1082030	1082824	OCR_73982	HMHA1	+	ENSG00000180448.6	rs72618591	0.368444	1082576	0.808906	1.49848	0.000212038	rs7249065	0.688891	SLE
chr19	1082030	1082824	OCR_73982	HMHA1	+	ENSG00000180448.6	19:1082182	0.536771	1082182	0.381557	1.21019	0.000171244	rs7249065	0.766397	SLE
chr19	1082030	1082824	OCR_73982	HMHA1	+	ENSG00000180448.6	rs11878920	0.720288	1082266	0.128217	1.06621	0.00015087	rs7249065	0.83416	SLE
chr19	1082030	1082824	OCR_73982	HMHA1	+	ENSG00000180448.6	rs11879092	0.744736	1082283	0.106008	1.05443	0.000149204	rs7249065	0.843759	SLE
chr19	1082030	1082824	OCR_73982	HMHA1	+	ENSG00000180448.6	rs11879091	0.780673	1082265	0.07753	1.03953	0.000147095	rs7249065	0.857383	SLE
chr19	1082030	1082824	OCR_73982	HMHA1	+	ENSG00000180448.6	rs72618591	0.02283	1082576	5.18139	13.3391	0.00132022	rs2024092	0.801332	UC
chr19	1087430	1089020	OCR_73983	POLR2E	-	ENSG00000099817.7	rs5826721	0.0459038	1087704	3.98512	7.33429	0.00103781	rs7249065	0.420548	SLE
chr19	1087430	1089020	OCR_73983	POLR2E	-	ENSG00000099817.7	rs546409118	0.0861966	1088428	2.94401	4.35796	0.000616659	rs7249065	0.491713	SLE
chr19	1087430	1089020	OCR_73983	POLR2E	-	ENSG00000099817.7	rs556292914	0.102721	1088611	2.66278	3.7863	0.000535769	rs7249065	0.511674	SLE
chr19	1087430	1089020	OCR_73983	POLR2E	-	ENSG00000099817.7	rs2238586	0.154378	1088078	2.02845	2.75723	0.000390152	rs7249065	0.558336	SLE
chr19	1087430	1089020	OCR_73983	POLR2E	-	ENSG00000099817.7	rs6843	0.163807	1088285	1.93873	2.63626	0.000373036	rs7249065	0.565934	SLE
chr19	1087430	1089020	OCR_73983	POLR2E	-	ENSG00000099817.7	rs573877413	0.222608	1087564	1.48748	2.10379	0.00029769	rs7249065	0.608857	SLE
chr19	1087430	1089020	OCR_73983	POLR2E	-	ENSG00000099817.7	rs12253	0.247055	1088639	1.33988	1.95412	0.000276512	rs7249065	0.627216	SLE
chr19	1087430	1089020	OCR_73983	POLR2E	-	ENSG00000099817.7	rs560771513	0.254194	1088239	1.30011	1.91564	0.000271067	rs7249065	0.631052	SLE
chr19	1087430	1089020	OCR_73983	POLR2E	-	ENSG00000099817.7	rs190049811	0.266064	1088209	1.23693	1.85607	0.000262638	rs7249065	0.638256	SLE
chr19	1087430	1089020	OCR_73983	POLR2E	-	ENSG00000099817.7	rs142922622	0.268216	1088500	1.22585	1.84582	0.000261187	rs7249065	0.640089	SLE
chr19	1087430	1089020	OCR_73983	POLR2E	-	ENSG00000099817.7	rs114749057	0.275975	1088834	1.1868	1.81014	0.000256138	rs7249065	0.642161	SLE
chr19	1087430	1089020	OCR_73983	POLR2E	-	ENSG00000099817.7	rs10405108	0.284298	1088934	1.14643	1.77396	0.000251018	rs7249065	0.645966	SLE
chr19	1087430	1089020	OCR_73983	POLR2E	-	ENSG00000099817.7	rs573559415	0.300295	1088723	1.07288	1.70991	0.000241956	rs7249065	0.654353	SLE
chr19	1087430	1089020	OCR_73983	POLR2E	-	ENSG00000099817.7	rs187338292	0.311327	1087935	1.02504	1.66949	0.000236236	rs7249065	0.66105	SLE
chr19	1087430	1089020	OCR_73983	POLR2E	-	ENSG00000099817.7	rs76162940	0.312319	1087834	1.02084	1.66599	0.000235741	rs7249065	0.661757	SLE
chr19	1087430	1089020	OCR_73983	POLR2E	-	ENSG00000099817.7	rs181017759	0.356012	1088482	0.851912	1.53105	0.000216647	rs7249065	0.683758	SLE
chr19	1087430	1089020	OCR_73983	POLR2E	-	ENSG00000099817.7	rs200686261	0.359671	1087951	0.839042	1.52123	0.000215257	rs7249065	0.685268	SLE
chr19	1087430	1089020	OCR_73983	POLR2E	-	ENSG00000099817.7	rs8113195	0.417733	1087732	0.656684	1.38866	0.000196498	rs7249065	0.712726	SLE
chr19	1087430	1089020	OCR_73983	POLR2E	-	ENSG00000099817.7	rs532836591	0.522212	1088798	0.409522	1.22723	0.000173655	rs7249065	0.760875	SLE
chr19	1087430	1089020	OCR_73983	POLR2E	-	ENSG00000099817.7	rs138302172	0.549436	1087503	0.358329	1.19622	0.000169267	rs7249065	0.770995	SLE
chr19	1087430	1089020	OCR_73983	POLR2E	-	ENSG00000099817.7	rs545849567	0.699425	1088947	0.149071	1.07738	0.000152452	rs7249065	0.826733	SLE
chr19	1087430	1089020	OCR_73983	POLR2E	-	ENSG00000099817.7	rs145147422	0.734629	1088782	0.114904	1.05913	0.000149869	rs7249065	0.840021	SLE
chr19	1087430	1089020	OCR_73983	POLR2E	-	ENSG00000099817.7	rs527981895	0.808012	1088256	0.0590449	1.02996	0.000145742	rs7249065	0.865433	SLE
chr19	1087430	1089020	OCR_73983	POLR2E	-	ENSG00000099817.7	rs8113305	0.829355	1088017	0.0464527	1.0235	0.000144827	rs7249065	0.874438	SLE
chr19	1087430	1089020	OCR_73983	POLR2E	-	ENSG00000099817.7	rs6844	0.831913	1088318	0.0450495	1.02278	0.000144725	rs7249065	0.875596	SLE
chr19	1087430	1089020	OCR_73983	POLR2E	-	ENSG00000099817.7	rs2238587	0.838167	1088119	0.0417134	1.02108	0.000144484	rs7249065	0.879067	SLE
chr19	1087430	1089020	OCR_73983	POLR2E	-	ENSG00000099817.7	rs573963242	0.869124	1088894	0.0271496	1.01367	0.000143436	rs7249065	0.899787	SLE
chr19	1087430	1089020	OCR_73983	POLR2E	-	ENSG00000099817.7	rs138821820	0.881922	1088799	0.0220621	1.01109	0.000143071	rs7249065	0.911962	SLE
chr19	1087430	1089020	OCR_73983	POLR2E	-	ENSG00000099817.7	rs569146969	0.888769	1087717	0.0195614	1.00983	0.000142893	rs7249065	0.918397	SLE
chr19	1087430	1089020	OCR_73983	POLR2E	-	ENSG00000099817.7	rs576990955	0.898014	1087770	0.0164277	1.00825	0.000142669	rs7249065	0.93096	SLE
chr19	1087430	1089020	OCR_73983	POLR2E	-	ENSG00000099817.7	rs191551679	0.909143	1087749	0.0130233	1.00653	0.000142426	rs7249065	0.94778	SLE
chr19	1087430	1089020	OCR_73983	POLR2E	-	ENSG00000099817.7	rs6843	0.02566	1088285	4.97878	12.054	0.00119302	rs2024092	0.812712	UC
chr19	1087430	1089020	OCR_73983	POLR2E	-	ENSG00000099817.7	rs2238586	0.03223	1088078	4.58622	9.9057	0.000980403	rs2024092	0.825889	UC
chr19	1087430	1089020	OCR_73983	POLR2E	-	ENSG00000099817.7	rs149575120	0.2168	1087556	1.52543	2.14409	0.000212208	rs2024092	0.930608	UC
chr19	1094783	1096186	OCR_73984	POLR2E	-	ENSG00000099817.7	rs2074448	0.0528543	1095738	3.74852	6.51599	0.000922025	rs7249065	0.440842	SLE
chr19	1094783	1096186	OCR_73984	POLR2E	-	ENSG00000099817.7	rs542226267	0.0633026	1095002	3.44867	5.6088	0.000793655	rs7249065	0.456148	SLE
chr19	1094783	1096186	OCR_73984	POLR2E	-	ENSG00000099817.7	rs56259591	0.0706004	1094989	3.26901	5.12691	0.000725467	rs7249065	0.471354	SLE
chr19	1094783	1096186	OCR_73984	POLR2E	-	ENSG00000099817.7	rs73507235	0.152391	1095532	2.04815	2.78452	0.000394015	rs7249065	0.554028	SLE
chr19	1094783	1096186	OCR_73984	POLR2E	-	ENSG00000099817.7	rs56077864	0.197857	1095137	1.65812	2.29117	0.000324204	rs7249065	0.5905	SLE
chr19	1094783	1096186	OCR_73984	POLR2E	-	ENSG00000099817.7	rs73507232	0.206251	1094874	1.59755	2.22281	0.000314532	rs7249065	0.59783	SLE
chr19	1094783	1096186	OCR_73984	POLR2E	-	ENSG00000099817.7	rs11084882	0.214799	1095716	1.53878	2.15845	0.000305425	rs7249065	0.604036	SLE
chr19	1094783	1096186	OCR_73984	POLR2E	-	ENSG00000099817.7	rs55917129	0.216538	1095823	1.52717	2.14595	0.000303656	rs7249065	0.605559	SLE
chr19	1094783	1096186	OCR_73984	POLR2E	-	ENSG00000099817.7	rs149504848	0.251647	1095271	1.31414	1.92913	0.000272975	rs7249065	0.630236	SLE
chr19	1094783	1096186	OCR_73984	POLR2E	-	ENSG00000099817.7	rs1046040	0.271245	1095514	1.21044	1.83166	0.000259182	rs7249065	0.64139	SLE
chr19	1094783	1096186	OCR_73984	POLR2E	-	ENSG00000099817.7	rs527419590	0.330845	1095144	0.945588	1.60447	0.000227035	rs7249065	0.668222	SLE
chr19	1094783	1096186	OCR_73984	POLR2E	-	ENSG00000099817.7	rs548183372	0.337011	1094783	0.921769	1.58548	0.000224348	rs7249065	0.672955	SLE
chr19	1094783	1096186	OCR_73984	POLR2E	-	ENSG00000099817.7	rs116779126	0.420256	1095472	0.649599	1.38375	0.000195804	rs7249065	0.714099	SLE
chr19	1094783	1096186	OCR_73984	POLR2E	-	ENSG00000099817.7	rs34912475	0.464053	1095168	0.536101	1.30741	0.000185001	rs7249065	0.737084	SLE
chr19	1094783	1096186	OCR_73984	POLR2E	-	ENSG00000099817.7	rs10416031	0.496191	1095151	0.463074	1.26054	0.000178368	rs7249065	0.749976	SLE
chr19	1094783	1096186	OCR_73984	POLR2E	-	ENSG00000099817.7	rs545796123	0.576307	1095850	0.312243	1.16897	0.000165411	rs7249065	0.77986	SLE
chr19	1094783	1096186	OCR_73984	POLR2E	-	ENSG00000099817.7	rs1046041	0.600529	1095336	0.274199	1.14694	0.000162294	rs7249065	0.789353	SLE
chr19	1094783	1096186	OCR_73984	POLR2E	-	ENSG00000099817.7	rs17551856	0.669278	1096044	0.182448	1.09551	0.000155017	rs7249065	0.814593	SLE
chr19	1094783	1096186	OCR_73984	POLR2E	-	ENSG00000099817.7	rs2074449	0.671087	1095753	0.180333	1.09436	0.000154853	rs7249065	0.815523	SLE
chr19	1094783	1096186	OCR_73984	POLR2E	-	ENSG00000099817.7	rs17526231	0.674704	1095646	0.176149	1.09207	0.00015453	rs7249065	0.817688	SLE
chr19	1094783	1096186	OCR_73984	POLR2E	-	ENSG00000099817.7	rs370550675	0.676166	1095925	0.174474	1.09116	0.0001544	rs7249065	0.818306	SLE
chr19	1094783	1096186	OCR_73984	POLR2E	-	ENSG00000099817.7	rs551862816	0.682763	1095494	0.167032	1.0871	0.000153827	rs7249065	0.820001	SLE
chr19	1094783	1096186	OCR_73984	POLR2E	-	ENSG00000099817.7	rs2074447	0.687603	1095581	0.161693	1.0842	0.000153417	rs7249065	0.821383	SLE
chr19	1094783	1096186	OCR_73984	POLR2E	-	ENSG00000099817.7	rs17554909	0.742712	1095430	0.107757	1.05536	0.000149335	rs7249065	0.842864	SLE
chr19	1094783	1096186	OCR_73984	POLR2E	-	ENSG00000099817.7	rs2074444	0.750064	1095030	0.101477	1.05205	0.000148867	rs7249065	0.845398	SLE
chr19	1094783	1096186	OCR_73984	POLR2E	-	ENSG00000099817.7	rs2074445	0.752012	1095061	0.0998481	1.05119	0.000148745	rs7249065	0.84644	SLE
chr19	1094783	1096186	OCR_73984	POLR2E	-	ENSG00000099817.7	rs17523177	0.75688	1096094	0.0958401	1.04909	0.000148448	rs7249065	0.848372	SLE
chr19	1094783	1096186	OCR_73984	POLR2E	-	ENSG00000099817.7	rs540672916	0.759278	1095056	0.0938988	1.04807	0.000148304	rs7249065	0.84941	SLE
chr19	1094783	1096186	OCR_73984	POLR2E	-	ENSG00000099817.7	rs2074446	0.765461	1095122	0.0889932	1.0455	0.00014794	rs7249065	0.851039	SLE
chr19	1094783	1096186	OCR_73984	POLR2E	-	ENSG00000099817.7	rs17554924	0.7709	1095352	0.0847962	1.04331	0.00014763	rs7249065	0.853995	SLE
chr19	1094783	1096186	OCR_73984	POLR2E	-	ENSG00000099817.7	rs17554917	0.77111	1095355	0.0846364	1.04323	0.000147618	rs7249065	0.854142	SLE
chr19	1094783	1096186	OCR_73984	POLR2E	-	ENSG00000099817.7	rs369728559	0.791239	1095922	0.0700672	1.03565	0.000146547	rs7249065	0.860319	SLE
chr19	1094783	1096186	OCR_73984	POLR2E	-	ENSG00000099817.7	rs371018866	0.821111	1095334	0.0511286	1.02589	0.000145166	rs7249065	0.870233	SLE
chr19	1094783	1096186	OCR_73984	POLR2E	-	ENSG00000099817.7	rs565816314	0.855127	1095604	0.0333357	1.01681	0.00014388	rs7249065	0.889301	SLE
chr19	1094783	1096186	OCR_73984	POLR2E	-	ENSG00000099817.7	rs112308501	0.86117	1096017	0.0305848	1.01541	0.000143682	rs7249065	0.893327	SLE
chr19	1094783	1096186	OCR_73984	POLR2E	-	ENSG00000099817.7	rs529082383	0.890839	1096011	0.0188355	1.00946	0.000142841	rs7249065	0.920968	SLE
chr19	1094783	1096186	OCR_73984	POLR2E	-	ENSG00000099817.7	rs185293720	0.893248	1096085	0.0180084	1.00904	0.000142782	rs7249065	0.92311	SLE
chr19	1094783	1096186	OCR_73984	POLR2E	-	ENSG00000099817.7	rs79627116	0.894136	1095862	0.0177083	1.00889	0.00014276	rs7249065	0.925109	SLE
chr19	1094783	1096186	OCR_73984	POLR2E	-	ENSG00000099817.7	rs1046040	0.03596	1095514	4.399	9.0205	0.000892792	rs2024092	0.835177	UC
chr19	1094783	1096186	OCR_73984	POLR2E	-	ENSG00000099817.7	rs55917129	0.04059	1095823	4.19305	8.13784	0.000805432	rs2024092	0.841757	UC
chr19	1094783	1096186	OCR_73984	POLR2E	-	ENSG00000099817.7	rs11084882	0.04831	1095716	3.89917	7.02577	0.000695366	rs2024092	0.852771	UC
chr19	1094783	1096186	OCR_73984	POLR2E	-	ENSG00000099817.7	rs10416031	0.2057	1095151	1.60143	2.22714	0.000220428	rs2024092	0.926495	UC
chr19	1094783	1096186	OCR_73984	POLR2E	-	ENSG00000099817.7	rs34912475	0.2258	1095168	1.46712	2.08249	0.000206111	rs2024092	0.933541	UC
chr19	1094783	1096186	OCR_73984	POLR2E	-	ENSG00000099817.7	rs1046041	0.3169	1095336	1.0017	1.65012	0.000163319	rs2024092	0.948141	UC
chr19	1103510	1104934	OCR_73987	GPX4	+	ENSG00000167468.12	rs8103551	0.00239127	1103782	9.22198	100.584	0.0142328	rs7249065	0.0650703	SLE
chr19	1103510	1104934	OCR_73987	GPX4	+	ENSG00000167468.12	rs57563163	0.0296642	1104563	4.72865	10.6368	0.00150513	rs7249065	0.37851	SLE
chr19	1103510	1104934	OCR_73987	GPX4	+	ENSG00000167468.12	rs17526264	0.0735419	1103768	3.20214	4.95834	0.000701614	rs7249065	0.477049	SLE
chr19	1103510	1104934	OCR_73987	GPX4	+	ENSG00000167468.12	rs17554931	0.0793749	1103785	3.07765	4.65912	0.000659274	rs7249065	0.487914	SLE
chr19	1103510	1104934	OCR_73987	GPX4	+	ENSG00000167468.12	rs2074450	0.0931796	1104438	2.81857	4.09302	0.00057917	rs7249065	0.500059	SLE
chr19	1103510	1104934	OCR_73987	GPX4	+	ENSG00000167468.12	rs36207878	0.123177	1103612	2.37645	3.28126	0.000464303	rs7249065	0.526793	SLE
chr19	1103510	1104934	OCR_73987	GPX4	+	ENSG00000167468.12	rs8103283	0.331478	1103522	0.943115	1.60249	0.000226755	rs7249065	0.668676	SLE
chr19	1103510	1104934	OCR_73987	GPX4	+	ENSG00000167468.12	rs8178968	0.351976	1104151	0.86632	1.54212	0.000218213	rs7249065	0.68093	SLE
chr19	1103510	1104934	OCR_73987	GPX4	+	ENSG00000167468.12	rs569964280	0.389719	1104594	0.739819	1.4476	0.000204838	rs7249065	0.69847	SLE
chr19	1103510	1104934	OCR_73987	GPX4	+	ENSG00000167468.12	rs562612528	0.404217	1103809	0.695745	1.41605	0.000200374	rs7249065	0.706582	SLE
chr19	1103510	1104934	OCR_73987	GPX4	+	ENSG00000167468.12	rs36207273	0.444973	1103744	0.583425	1.33872	0.000189431	rs7249065	0.726798	SLE
chr19	1103510	1104934	OCR_73987	GPX4	+	ENSG00000167468.12	rs183015432	0.450789	1104273	0.568667	1.32888	0.000188038	rs7249065	0.729441	SLE
chr19	1103510	1104934	OCR_73987	GPX4	+	ENSG00000167468.12	rs8178965	0.459907	1103865	0.546121	1.31398	0.00018593	rs7249065	0.734303	SLE
chr19	1103510	1104934	OCR_73987	GPX4	+	ENSG00000167468.12	rs529684277	0.569519	1104214	0.323488	1.17556	0.000166344	rs7249065	0.777537	SLE
chr19	1103510	1104934	OCR_73987	GPX4	+	ENSG00000167468.12	rs566592153	0.571377	1103953	0.320384	1.17374	0.000166086	rs7249065	0.778534	SLE
chr19	1103510	1104934	OCR_73987	GPX4	+	ENSG00000167468.12	rs531452768	0.590679	1104365	0.289285	1.15563	0.000163523	rs7249065	0.784957	SLE
chr19	1103510	1104934	OCR_73987	GPX4	+	ENSG00000167468.12	rs566928862	0.629663	1104527	0.232518	1.12329	0.000158947	rs7249065	0.800933	SLE
chr19	1103510	1104934	OCR_73987	GPX4	+	ENSG00000167468.12	rs117193629	0.642976	1104874	0.214871	1.11342	0.000157551	rs7249065	0.805992	SLE
chr19	1103510	1104934	OCR_73987	GPX4	+	ENSG00000167468.12	rs532171942	0.65123	1103789	0.204353	1.10758	0.000156724	rs7249065	0.809293	SLE
chr19	1103510	1104934	OCR_73987	GPX4	+	ENSG00000167468.12	rs4807542	0.661526	1104078	0.191675	1.10058	0.000155734	rs7249065	0.812573	SLE
chr19	1103510	1104934	OCR_73987	GPX4	+	ENSG00000167468.12	rs551922675	0.766724	1104303	0.0880088	1.04499	0.000147867	rs7249065	0.851779	SLE
chr19	1103510	1104934	OCR_73987	GPX4	+	ENSG00000167468.12	rs11407575	0.787343	1103619	0.0727718	1.03706	0.000146745	rs7249065	0.859146	SLE
chr19	1103510	1104934	OCR_73987	GPX4	+	ENSG00000167468.12	rs8178967	0.796188	1104047	0.0667104	1.03392	0.000146301	rs7249065	0.861929	SLE
chr19	1103510	1104934	OCR_73987	GPX4	+	ENSG00000167468.12	rs8178966	0.852952	1103971	0.0343558	1.01733	0.000143953	rs7249065	0.887431	SLE
chr19	1103510	1104934	OCR_73987	GPX4	+	ENSG00000167468.12	rs190085630	0.898039	1103748	0.0164196	1.00824	0.000142668	rs7249065	0.931103	SLE
chr19	1103510	1104934	OCR_73987	GPX4	+	ENSG00000167468.12	rs533890588	0.903129	1103528	0.0148132	1.00743	0.000142554	rs7249065	0.939374	SLE
chr19	1103510	1104934	OCR_73987	GPX4	+	ENSG00000167468.12	rs4807542	0.01791	1104078	5.60493	16.4852	0.0016316	rs2024092	0.779874	UC
chr19	1103510	1104934	OCR_73987	GPX4	+	ENSG00000167468.12	rs183015432	0.09283	1104273	2.8246	4.10539	0.000406325	rs2024092	0.885087	UC
chr19	1103510	1104934	OCR_73987	GPX4	+	ENSG00000167468.12	rs36207878	0.1808	1103612	1.79104	2.4486	0.000242347	rs2024092	0.918873	UC
chr19	1103510	1104934	OCR_73987	GPX4	+	ENSG00000167468.12	rs8103283	0.2077	1103522	1.58739	2.21155	0.000218885	rs2024092	0.927593	UC
chr19	1103510	1104934	OCR_73987	GPX4	+	ENSG00000167468.12	rs17554931	0.2926	1103785	1.10762	1.73987	0.000172201	rs2024092	0.946811	UC
chr19	1104976	1105143	OCR_73988	GPX4	+	ENSG00000167468.12	rs8178969	0.730859	1105099	0.118324	1.06095	0.000150126	rs7249065	0.838222	SLE
chr19	1104976	1105143	OCR_73988	GPX4	+	ENSG00000167468.12	rs560004644	0.880847	1105024	0.0224687	1.0113	0.0001431	rs7249065	0.910675	SLE
chr19	1113174	1114097	OCR_73989	SBNO2	-	ENSG00000064932.11	rs188207884	0.0429273	1114029	4.09826	7.76116	0.00109822	rs7249065	0.414152	SLE
chr19	1113174	1114097	OCR_73989	SBNO2	-	ENSG00000064932.11	rs115170339	0.0992634	1113845	2.71734	3.89101	0.000550585	rs7249065	0.506233	SLE
chr19	1113174	1114097	OCR_73989	SBNO2	-	ENSG00000064932.11	rs111584964	0.228969	1113401	1.44725	2.0619	0.000291762	rs7249065	0.614454	SLE
chr19	1113174	1114097	OCR_73989	SBNO2	-	ENSG00000064932.11	rs112914802	0.247339	1113523	1.33827	1.95255	0.000276289	rs7249065	0.627769	SLE
chr19	1113174	1114097	OCR_73989	SBNO2	-	ENSG00000064932.11	rs558963261	0.271249	1113429	1.21042	1.83164	0.00025918	rs7249065	0.641649	SLE
chr19	1113174	1114097	OCR_73989	SBNO2	-	ENSG00000064932.11	rs76868812	0.37509	1113720	0.786732	1.48196	0.0002097	rs7249065	0.692053	SLE
chr19	1113174	1114097	OCR_73989	SBNO2	-	ENSG00000064932.11	rs2302110	0.589372	1113701	0.291326	1.15681	0.00016369	rs7249065	0.784139	SLE
chr19	1113174	1114097	OCR_73989	SBNO2	-	ENSG00000064932.11	rs371581389	0.610231	1113520	0.259839	1.13874	0.000161133	rs7249065	0.79501	SLE
chr19	1113174	1114097	OCR_73989	SBNO2	-	ENSG00000064932.11	rs74884477	0.611973	1113831	0.257312	1.1373	0.00016093	rs7249065	0.796137	SLE
chr19	1113174	1114097	OCR_73989	SBNO2	-	ENSG00000064932.11	rs3826961	0.625486	1113976	0.238232	1.1265	0.000159402	rs7249065	0.799819	SLE
chr19	1113174	1114097	OCR_73989	SBNO2	-	ENSG00000064932.11	rs111442456	0.67555	1113417	0.175178	1.09154	0.000154455	rs7249065	0.817997	SLE
chr19	1113174	1114097	OCR_73989	SBNO2	-	ENSG00000064932.11	rs144601005	0.853983	1114023	0.0338703	1.01708	0.000143919	rs7249065	0.887719	SLE
chr19	1113174	1114097	OCR_73989	SBNO2	-	ENSG00000064932.11	rs3826961	0.252	1113976	1.31218	1.92724	0.000190746	rs2024092	0.938515	UC
chr19	1113174	1114097	OCR_73989	SBNO2	-	ENSG00000064932.11	rs2302110	0.2672	1113701	1.23107	1.85064	0.000183165	rs2024092	0.941513	UC
chr19	1130691	1133231	OCR_73990	SBNO2	-	ENSG00000064932.11	rs57479415	0.00434052	1130967	8.13557	58.4274	0.00826758	rs7249065	0.101157	SLE
chr19	1130691	1133231	OCR_73990	SBNO2	-	ENSG00000064932.11	rs59237331	0.00468157	1130704	7.99852	54.5577	0.00772	rs7249065	0.133072	SLE
chr19	1130691	1133231	OCR_73990	SBNO2	-	ENSG00000064932.11	rs10412582	0.00837551	1130746	6.95137	32.3199	0.00457333	rs7249065	0.239764	SLE
chr19	1130691	1133231	OCR_73990	SBNO2	-	ENSG00000064932.11	rs549994959	0.0417272	1133031	4.14624	7.94957	0.00112488	rs7249065	0.410841	SLE
chr19	1130691	1133231	OCR_73990	SBNO2	-	ENSG00000064932.11	rs113599780	0.0439596	1131049	4.05811	7.60691	0.00107639	rs7249065	0.417398	SLE
chr19	1130691	1133231	OCR_73990	SBNO2	-	ENSG00000064932.11	rs66590933	0.0530307	1131416	3.74295	6.49788	0.000919461	rs7249065	0.441761	SLE
chr19	1130691	1133231	OCR_73990	SBNO2	-	ENSG00000064932.11	rs2286400	0.0794556	1132007	3.076	4.65528	0.00065873	rs7249065	0.488573	SLE
chr19	1130691	1133231	OCR_73990	SBNO2	-	ENSG00000064932.11	rs886990	0.113254	1132976	2.50822	3.50471	0.000495923	rs7249065	0.520557	SLE
chr19	1130691	1133231	OCR_73990	SBNO2	-	ENSG00000064932.11	rs2286401	0.172188	1132424	1.86379	2.53932	0.000359318	rs7249065	0.573238	SLE
chr19	1130691	1133231	OCR_73990	SBNO2	-	ENSG00000064932.11	rs2286399	0.181412	1131981	1.78602	2.44247	0.000345614	rs7249065	0.57678	SLE
chr19	1130691	1133231	OCR_73990	SBNO2	-	ENSG00000064932.11	rs10413074	0.181736	1130986	1.78337	2.43924	0.000345156	rs7249065	0.577816	SLE
chr19	1130691	1133231	OCR_73990	SBNO2	-	ENSG00000064932.11	rs112660142	0.193861	1133213	1.68803	2.32568	0.000329088	rs7249065	0.586583	SLE
chr19	1130691	1133231	OCR_73990	SBNO2	-	ENSG00000064932.11	rs564951456	0.208254	1132970	1.58352	2.20728	0.000312334	rs7249065	0.60065	SLE
chr19	1130691	1133231	OCR_73990	SBNO2	-	ENSG00000064932.11	rs368792124	0.25249	1132781	1.30947	1.92464	0.000272339	rs7249065	0.630509	SLE
chr19	1130691	1133231	OCR_73990	SBNO2	-	ENSG00000064932.11	rs534018924	0.255126	1132012	1.29501	1.91077	0.000270378	rs7249065	0.631593	SLE
chr19	1130691	1133231	OCR_73990	SBNO2	-	ENSG00000064932.11	rs879983	0.301697	1132637	1.06668	1.70461	0.000241206	rs7249065	0.655319	SLE
chr19	1130691	1133231	OCR_73990	SBNO2	-	ENSG00000064932.11	rs72975591	0.421527	1131226	0.646054	1.3813	0.000195457	rs7249065	0.714686	SLE
chr19	1130691	1133231	OCR_73990	SBNO2	-	ENSG00000064932.11	rs12971921	0.42712	1132969	0.630642	1.3707	0.000193956	rs7249065	0.717216	SLE
chr19	1130691	1133231	OCR_73990	SBNO2	-	ENSG00000064932.11	rs566716454	0.539579	1132544	0.376321	1.20703	0.000170796	rs7249065	0.767936	SLE
chr19	1130691	1133231	OCR_73990	SBNO2	-	ENSG00000064932.11	rs111537696	0.569399	1132654	0.323689	1.17568	0.00016636	rs7249065	0.777371	SLE
chr19	1130691	1133231	OCR_73990	SBNO2	-	ENSG00000064932.11	rs559870950	0.681463	1132230	0.168484	1.08789	0.000153939	rs7249065	0.819539	SLE
chr19	1130691	1133231	OCR_73990	SBNO2	-	ENSG00000064932.11	rs56744597	0.711221	1131012	0.13706	1.07093	0.000151539	rs7249065	0.830532	SLE
chr19	1130691	1133231	OCR_73990	SBNO2	-	ENSG00000064932.11	rs61612228	0.713687	1132346	0.134622	1.06963	0.000151354	rs7249065	0.831289	SLE
chr19	1130691	1133231	OCR_73990	SBNO2	-	ENSG00000064932.11	rs186598082	0.810333	1132736	0.0575983	1.02922	0.000145636	rs7249065	0.866744	SLE
chr19	1130691	1133231	OCR_73990	SBNO2	-	ENSG00000064932.11	rs191943937	0.83915	1131744	0.0412012	1.02081	0.000144447	rs7249065	0.879644	SLE
chr19	1130691	1133231	OCR_73990	SBNO2	-	ENSG00000064932.11	rs77710000	0.868175	1130806	0.0275484	1.01387	0.000143464	rs7249065	0.89907	SLE
chr19	1130691	1133231	OCR_73990	SBNO2	-	ENSG00000064932.11	rs80309689	0.874387	1131277	0.024992	1.01257	0.000143281	rs7249065	0.904088	SLE
chr19	1130691	1133231	OCR_73990	SBNO2	-	ENSG00000064932.11	rs568659283	0.897124	1130844	0.0167173	1.00839	0.000142689	rs7249065	0.929105	SLE
chr19	1130691	1133231	OCR_73990	SBNO2	-	ENSG00000064932.11	rs2286399	0.05818	1131981	3.58852	6.01503	0.000595329	rs2024092	0.862446	UC
chr19	1130691	1133231	OCR_73990	SBNO2	-	ENSG00000064932.11	rs10413074	0.1041	1130986	2.64158	3.74638	0.000370793	rs2024092	0.888944	UC
chr19	1130691	1133231	OCR_73990	SBNO2	-	ENSG00000064932.11	rs112660142	0.1591	1133213	1.98276	2.69495	0.000266729	rs2024092	0.911011	UC
chr19	1130691	1133231	OCR_73990	SBNO2	-	ENSG00000064932.11	rs111898700	0.2935	1131473	1.1035	1.73629	0.000171847	rs2024092	0.946983	UC
chr19	1133426	1133855	OCR_73991	SBNO2	-	ENSG00000064932.11	rs113675022	0.0221884	1133818	5.23095	13.6737	0.00193485	rs7249065	0.341464	SLE
chr19	1133426	1133855	OCR_73991	SBNO2	-	ENSG00000064932.11	rs78468943	0.192564	1133833	1.69789	2.33718	0.000330715	rs7249065	0.584603	SLE
chr19	1133426	1133855	OCR_73991	SBNO2	-	ENSG00000064932.11	rs71868126	0.192695	1133475	1.69689	2.33601	0.00033055	rs7249065	0.584934	SLE
chr19	1133426	1133855	OCR_73991	SBNO2	-	ENSG00000064932.11	rs572048552	0.596442	1133696	0.280396	1.1505	0.000162798	rs7249065	0.787077	SLE
chr19	1133426	1133855	OCR_73991	SBNO2	-	ENSG00000064932.11	rs535710994	0.819583	1133608	0.0520211	1.02635	0.000145231	rs7249065	0.869798	SLE
chr19	1133426	1133855	OCR_73991	SBNO2	-	ENSG00000064932.11	rs149832780	0.869335	1133462	0.0270613	1.01362	0.000143429	rs7249065	0.900074	SLE
chr19	1133426	1133855	OCR_73991	SBNO2	-	ENSG00000064932.11	rs756734003	0.1634	1133475	1.94248	2.64121	0.00026141	rs2024092	0.912865	UC
chr19	1133426	1133855	OCR_73991	SBNO2	-	ENSG00000064932.11	rs78468943	0.1644	1133833	1.93328	2.6291	0.000260211	rs2024092	0.913125	UC
chr19	1173085	1174669	OCR_73992	SBNO2	-	ENSG00000064932.11	rs873073	0.0515443	1174414	3.7905	6.65421	0.000941582	rs7249065	0.435262	SLE
chr19	1173085	1174669	OCR_73992	SBNO2	-	ENSG00000064932.11	rs188011428	0.0720643	1173824	3.23536	5.04139	0.000713366	rs7249065	0.474224	SLE
chr19	1173085	1174669	OCR_73992	SBNO2	-	ENSG00000064932.11	rs79563012	0.0977299	1174612	2.7422	3.93969	0.000557473	rs7249065	0.503464	SLE
chr19	1173085	1174669	OCR_73992	SBNO2	-	ENSG00000064932.11	rs201384443	0.164684	1174317	1.93068	2.62568	0.000371539	rs7249065	0.566306	SLE
chr19	1173085	1174669	OCR_73992	SBNO2	-	ENSG00000064932.11	rs111467467	0.305365	1173826	1.05062	1.69098	0.000239277	rs7249065	0.657961	SLE
chr19	1173085	1174669	OCR_73992	SBNO2	-	ENSG00000064932.11	rs873074	0.332854	1174602	0.937762	1.5982	0.000226149	rs7249065	0.669128	SLE
chr19	1173085	1174669	OCR_73992	SBNO2	-	ENSG00000064932.11	rs184562613	0.505467	1173320	0.44344	1.24822	0.000176626	rs7249065	0.753344	SLE
chr19	1173085	1174669	OCR_73992	SBNO2	-	ENSG00000064932.11	rs117830785	0.549251	1173893	0.358661	1.19642	0.000169295	rs7249065	0.770825	SLE
chr19	1173085	1174669	OCR_73992	SBNO2	-	ENSG00000064932.11	rs55961439	0.64404	1173554	0.213497	1.11265	0.000157443	rs7249065	0.806622	SLE
chr19	1173085	1174669	OCR_73992	SBNO2	-	ENSG00000064932.11	rs555302555	0.756705	1174527	0.0959826	1.04916	0.000148458	rs7249065	0.848223	SLE
chr19	1173085	1174669	OCR_73992	SBNO2	-	ENSG00000064932.11	rs552701286	0.871629	1173576	0.0261112	1.01314	0.000143361	rs7249065	0.902081	SLE
chr19	1173085	1174669	OCR_73992	SBNO2	-	ENSG00000064932.11	rs372096825	0.882658	1173840	0.0217859	1.01095	0.000143052	rs7249065	0.912535	SLE
chr19	1173085	1174669	OCR_73992	SBNO2	-	ENSG00000064932.11	19:1173151	0.900151	1173151	0.0157429	1.0079	0.00014262	rs7249065	0.934669	SLE
chr19	1173085	1174669	OCR_73992	SBNO2	-	ENSG00000064932.11	rs79563012	0.1652	1174612	1.92597	2.6195	0.000259262	rs2024092	0.913384	UC
chr19	1189347	1189917	OCR_73994	STK11	+	ENSG00000118046.10	rs9304882	0.119904	1189482	2.41857	3.3511	0.000474186	rs7249065	0.525862	SLE
chr19	1189347	1189917	OCR_73994	STK11	+	ENSG00000118046.10	rs10451467	0.468794	1189793	0.524817	1.30006	0.00018396	rs7249065	0.739483	SLE
chr19	1189347	1189917	OCR_73994	STK11	+	ENSG00000118046.10	rs140622171	0.488058	1189560	0.480805	1.27176	0.000179956	rs7249065	0.746213	SLE
chr19	1189347	1189917	OCR_73994	STK11	+	ENSG00000118046.10	rs552702600	0.625989	1189546	0.237539	1.12611	0.000159347	rs7249065	0.800137	SLE
chr19	1189347	1189917	OCR_73994	STK11	+	ENSG00000118046.10	rs9304883	0.716011	1189540	0.132347	1.06841	0.000151182	rs7249065	0.832045	SLE
chr19	1189347	1189917	OCR_73994	STK11	+	ENSG00000118046.10	rs575392166	0.879661	1189684	0.0229216	1.01153	0.000143133	rs7249065	0.909673	SLE
chr19	1189347	1189917	OCR_73994	STK11	+	ENSG00000118046.10	rs181743899	0.885344	1189685	0.0207931	1.01045	0.000142981	rs7249065	0.914966	SLE
chr19	1205273	1206085	OCR_73997	STK11	+	ENSG00000118046.10	rs74720037	0.191036	1205637	1.70961	2.35092	0.000332659	rs7249065	0.584272	SLE
chr19	1205273	1206085	OCR_73997	STK11	+	ENSG00000118046.10	rs3795061	0.320731	1205339	0.985963	1.63719	0.000231665	rs7249065	0.664559	SLE
chr19	1205273	1206085	OCR_73997	STK11	+	ENSG00000118046.10	rs556466452	0.605855	1205498	0.266255	1.1424	0.000161651	rs7249065	0.792267	SLE
chr19	1205273	1206085	OCR_73997	STK11	+	ENSG00000118046.10	rs534251216	0.906996	1205453	0.0136489	1.00685	0.000142471	rs7249065	0.943507	SLE
chr19	1205273	1206085	OCR_73997	STK11	+	ENSG00000118046.10	rs3795061	0.1969	1205339	1.66522	2.29931	0.000227571	rs2024092	0.924266	UC
chr19	1207177	1207391	OCR_73998	STK11	+	ENSG00000118046.10	rs3764640	0.241107	1207238	1.37411	1.98785	0.000281285	rs7249065	0.623599	SLE
chr19	1207177	1207391	OCR_73998	STK11	+	ENSG00000118046.10	rs77762532	0.362315	1207286	0.829853	1.51426	0.00021427	rs7249065	0.685911	SLE
chr19	1207177	1207391	OCR_73998	STK11	+	ENSG00000118046.10	rs3764641	0.650412	1207280	0.205381	1.10815	0.000156805	rs7249065	0.808822	SLE
chr19	1207177	1207391	OCR_73998	STK11	+	ENSG00000118046.10	rs146412237	0.733106	1207361	0.116279	1.05986	0.000149972	rs7249065	0.838522	SLE
chr19	1207177	1207391	OCR_73998	STK11	+	ENSG00000118046.10	rs3764640	0.1084	1207238	2.57739	3.62806	0.000359082	rs2024092	0.891112	UC
chr19	4831251	4832046	OCR_74385	TICAM1	-	ENSG00000127666.8	rs4807000	1.58e-09	4831878	36.4331	8.15341e+07	0.225259	rs4807000	0.225259	VIT
chr19	10399784	10400773	OCR_74781	CTD-2369P2.8	-	ENSG00000267607.1	rs281440	0.1205	10400304	2.41081	3.33811	0.000826712	rs34536443	0.946541	JIA
chr19	10399784	10400773	OCR_74781	CTD-2369P2.8	-	ENSG00000267607.1	rs281439	0.1311	10400110	2.27943	3.12588	0.000774151	rs34536443	0.948951	JIA
chr19	10399784	10400773	OCR_74781	ICAM5	+	ENSG00000105376.4	rs281440	0.1205	10400304	2.41081	3.33811	0.000826712	rs34536443	0.946541	JIA
chr19	10399784	10400773	OCR_74781	ICAM5	+	ENSG00000105376.4	rs281439	0.1311	10400110	2.27943	3.12588	0.000774151	rs34536443	0.948951	JIA
chr19	10426021	10427476	OCR_74786	CTD-2369P2.10	-	ENSG00000167807.11	rs1124765	0.117	10426024	2.45703	3.41615	0.000846039	rs34536443	0.944039	JIA
chr19	10426021	10427476	OCR_74786	CTD-2369P2.10	-	ENSG00000167807.11	rs378395	0.119	10426422	2.43043	3.37102	0.000834863	rs34536443	0.945715	JIA
chr19	10426021	10427476	OCR_74786	FDX1L	-	ENSG00000267673.2	rs1124765	0.117	10426024	2.45703	3.41615	0.000846039	rs34536443	0.944039	JIA
chr19	10426021	10427476	OCR_74786	FDX1L	-	ENSG00000267673.2	rs378395	0.119	10426422	2.43043	3.37102	0.000834863	rs34536443	0.945715	JIA
chr19	10712893	10714531	OCR_74825	SLC44A2	+	ENSG00000129353.10	rs12460655	0.000622979	10714433	11.706	348.283	0.00281546	rs147622113	0.926656	SLE
chr19	47221444	47221913	OCR_77081	PRKD2	-	ENSG00000105287.8	rs313839	7.25997e-08	47221557	28.9941	1.9769e+06	0.175325	rs402072	0.792058	T1D
chr19	49117138	49117716	OCR_77253	FAM83E	-	ENSG00000105523.3	rs374886	0.4327	49117247	0.615565	1.36041	0.000875731	rs516246	0.72469	UC
chr19	49117138	49117716	OCR_77253	FAM83E	-	ENSG00000105523.3	rs78687328	0.4407	49117408	0.594459	1.34612	0.000866538	rs516246	0.728173	UC
chr19	49121923	49122985	OCR_77254	RPL18	-	ENSG00000063177.8	rs140382788	0.5055	49122696	0.443371	1.24818	0.000803488	rs516246	0.77634	UC
chr19	49121923	49122985	OCR_77254	RPL18	-	ENSG00000063177.8	rs3094287	0.5569	49122248	0.3451	1.18833	0.000764963	rs516246	0.810726	UC
chr19	49121923	49122985	OCR_77254	RPL18	-	ENSG00000063177.8	rs12608448	0.8341	49122049	0.0438677	1.02218	0.000658004	rs516246	0.92736	UC
chr19	49121923	49122985	OCR_77254	SPHK2	+	ENSG00000063176.11	rs140382788	0.5055	49122696	0.443371	1.24818	0.000803488	rs516246	0.77634	UC
chr19	49121923	49122985	OCR_77254	SPHK2	+	ENSG00000063176.11	rs3094287	0.5569	49122248	0.3451	1.18833	0.000764963	rs516246	0.810726	UC
chr19	49121923	49122985	OCR_77254	SPHK2	+	ENSG00000063176.11	rs12608448	0.8341	49122049	0.0438677	1.02218	0.000658004	rs516246	0.92736	UC
chr19	49127285	49127886	OCR_77255	AC022154.7	-	ENSG00000268093.1	rs386243	0.5833	49127490	0.30093	1.16237	0.000748253	rs516246	0.82511	UC
chr19	49127285	49127886	OCR_77255	SPHK2	+	ENSG00000063176.11	rs386243	0.5833	49127490	0.30093	1.16237	0.000748253	rs516246	0.82511	UC
chr19	49140507	49141768	OCR_77258	DBP	-	ENSG00000105516.6	rs3848543	0.135	49141532	2.23405	3.05574	0.00196707	rs516246	0.482176	UC
chr19	49140507	49141768	OCR_77258	DBP	-	ENSG00000105516.6	rs8102492	0.2641	49140809	1.24714	1.86557	0.00120092	rs516246	0.606102	UC
chr19	49140507	49141768	OCR_77258	CA11	-	ENSG00000063180.4	rs3848543	0.135	49141532	2.23405	3.05574	0.00196707	rs516246	0.482176	UC
chr19	49140507	49141768	OCR_77258	CA11	-	ENSG00000063180.4	rs8102492	0.2641	49140809	1.24714	1.86557	0.00120092	rs516246	0.606102	UC
chr19	49148096	49150200	OCR_77259	CA11	-	ENSG00000063180.4	rs10426317	0.5012	49148781	0.452395	1.25382	0.000807121	rs516246	0.773119	UC
chr19	49148096	49150200	OCR_77259	CA11	-	ENSG00000063180.4	rs34271003	0.6918	49148143	0.157144	1.08174	0.000696347	rs516246	0.875451	UC
chr19	49148096	49150200	OCR_77259	CA11	-	ENSG00000063180.4	rs73581711	0.8466	49150048	0.0374261	1.01889	0.000655888	rs516246	0.931957	UC
chr19	49186643	49186865	OCR_77263	RN7SL345P	+	ENSG00000264835.1	rs10421500	0.08242	49186717	3.01652	4.51887	0.00290892	rs516246	0.405796	UC
chr19	49186643	49186865	OCR_77263	RN7SL345P	+	ENSG00000264835.1	rs28746168	0.08984	49186769	2.87724	4.21487	0.00271323	rs516246	0.417049	UC
chr19	49199634	49200298	OCR_77264	FUT2	+	ENSG00000176920.10	rs182227756	0.003804	49199934	8.37508	65.8607	0.0423964	rs516246	0.24849	UC
chr19	49199634	49200298	OCR_77264	FUT2	+	ENSG00000176920.10	rs418821	0.5196	49199804	0.414687	1.23041	0.000792047	rs516246	0.785902	UC
chr19	49223687	49224647	OCR_77266	MAMSTR	-	ENSG00000176909.7	rs281393	0.1732	49224484	1.85503	2.52821	0.00162748	rs516246	0.529447	UC
chr19	49223687	49224647	OCR_77266	MAMSTR	-	ENSG00000176909.7	rs3859439	0.1833	49224389	1.77066	2.42379	0.00156026	rs516246	0.53893	UC
chr19	49228184	49228466	OCR_77267	RASIP1	-	ENSG00000105538.4	rs2287921	0.3608	49228272	0.835107	1.51824	0.000977336	rs516246	0.650953	UC
chr19	49229776	49230163	OCR_77269	RASIP1	-	ENSG00000105538.4	rs146711212	0.512	49229870	0.429977	1.23985	0.000798125	rs516246	0.78034	UC
chr19	49241835	49243082	OCR_77270	RASIP1	-	ENSG00000105538.4	rs973579	0.5483	49241976	0.360371	1.19744	0.000770826	rs516246	0.803059	UC
chr19	49248512	49248785	OCR_77271	IZUMO1	-	ENSG00000182264.4	rs838145	0.7003	49248730	0.14816	1.07689	0.000693227	rs516246	0.877535	UC
chr19	49248512	49248785	OCR_77271	IZUMO1	-	ENSG00000182264.4	rs12982115	0.8757	49248640	0.024468	1.01231	0.000651652	rs516246	0.94698	UC
chr19	49249935	49250655	OCR_77272	IZUMO1	-	ENSG00000182264.4	rs838144	0.7763	49250239	0.0807378	1.04119	0.000670247	rs516246	0.906802	UC
chr19	50167172	50169510	OCR_77405	IRF3	-	ENSG00000126456.11	rs2304205	4.43e-09	50168927	34.425	2.98738e+07	0.123672	rs2304206	0.289866	VIT
chr19	50167172	50169510	OCR_77405	IRF3	-	ENSG00000126456.11	rs2304206	4.47e-09	50168871	34.4075	2.96136e+07	0.122595	rs2304206	0.412461	VIT
chr19	50167172	50169510	OCR_77405	IRF3	-	ENSG00000126456.11	rs2304204	8.37e-09	50169020	33.1872	1.60882e+07	0.066602	rs2304206	0.637832	VIT
chr19	50167172	50169510	OCR_77405	BCL2L12	+	ENSG00000126453.5	rs2304205	4.43e-09	50168927	34.425	2.98738e+07	0.123672	rs2304206	0.289866	VIT
chr19	50167172	50169510	OCR_77405	BCL2L12	+	ENSG00000126453.5	rs2304206	4.47e-09	50168871	34.4075	2.96136e+07	0.122595	rs2304206	0.412461	VIT
chr19	50167172	50169510	OCR_77405	BCL2L12	+	ENSG00000126453.5	rs2304204	8.37e-09	50169020	33.1872	1.60882e+07	0.066602	rs2304206	0.637832	VIT
chr19	50191961	50194486	OCR_77411	ADM5	+	ENSG00000224420.3	rs1075453	3.31e-08	50194399	30.5167	4.23276e+06	0.0175228	rs2304206	0.938448	VIT
chr19	50191961	50194486	OCR_77411	CTB-33G10.6	-	ENSG00000268677.1	rs1075453	3.31e-08	50194399	30.5167	4.23276e+06	0.0175228	rs2304206	0.938448	VIT
chr19	50191961	50194486	OCR_77411	CPT1C	+	ENSG00000169169.10	rs1075453	3.31e-08	50194399	30.5167	4.23276e+06	0.0175228	rs2304206	0.938448	VIT
chr2	25141957	25143839	OCR_79159	ADCY3	-	ENSG00000138031.10	rs6746013	3.83e-11	25143649	43.6988	3.08376e+09	0.0208747	rs13407913	0.816923	CRO
chr2	25141957	25143839	OCR_79159	ADCY3	-	ENSG00000138031.10	rs6746013	1.144e-10	25143649	41.5584	1.05754e+09	0.0380537	rs13407913	0.672223	IBD
chr2	25141957	25143839	OCR_79159	ADCY3	-	ENSG00000138031.10	rs6746013	0.0002351	25143649	13.5274	865.859	0.00270488	rs13407913	0.911592	UC
chr2	25195495	25195706	OCR_79162	DNAJC27-AS1	+	ENSG00000224165.1	rs76286777	4.655e-11	25195577	43.3171	2.54792e+09	0.0916821	rs13407913	0.0916821	IBD
chr2	25195495	25195706	OCR_79162	DNAJC27-AS1	+	ENSG00000224165.1	rs76286777	6.16e-05	25195577	16.0528	3060.73	0.0095615	rs13407913	0.87348	UC
chr2	25195495	25195706	OCR_79162	DNAJC27	-	ENSG00000115137.7	rs76286777	4.655e-11	25195577	43.3171	2.54792e+09	0.0916821	rs13407913	0.0916821	IBD
chr2	25195495	25195706	OCR_79162	DNAJC27	-	ENSG00000115137.7	rs76286777	6.16e-05	25195577	16.0528	3060.73	0.0095615	rs13407913	0.87348	UC
chr2	27651015	27652446	OCR_79347	NRBP1	+	ENSG00000115216.9	rs780100	0.01352	27652153	6.09976	21.1128	0.00436262	rs1260326	0.738127	UC
chr2	27651015	27652446	OCR_79347	NRBP1	+	ENSG00000115216.9	rs1647267	0.01484	27651054	5.93536	19.4468	0.00401836	rs1260326	0.762651	UC
chr2	27651015	27652446	OCR_79347	NRBP1	+	ENSG00000115216.9	rs2303370	0.01678	27651375	5.71924	17.4549	0.00360677	rs1260326	0.808235	UC
chr2	27651015	27652446	OCR_79347	NRBP1	+	ENSG00000115216.9	rs10182937	0.02206	27651693	5.24105	13.7429	0.00283975	rs1260326	0.834103	UC
chr2	27653197	27653495	OCR_79348	NRBP1	+	ENSG00000115216.9	rs187972942	0.03713	27653445	4.34444	8.77774	0.00181378	rs1260326	0.895702	UC
chr2	43824025	43824213	OCR_80383	THADA	-	ENSG00000115970.14	rs111545708	0.009304	43824191	6.76352	29.4225	0.000516932	rs10495903	0.943641	UC
chr2	55843890	55845218	OCR_81205	SMEK2	-	ENSG00000138041.11	rs10200159	7.67e-13	55845109	51.3648	1.42473e+11	0.0260074	rs10200159	0.304648	VIT
chr2	55843890	55845218	OCR_81205	RP11-554J4.1	+	ENSG00000272606.1	rs10200159	7.67e-13	55845109	51.3648	1.42473e+11	0.0260074	rs10200159	0.304648	VIT
chr2	60983041	60984444	OCR_81513	PAPOLG	+	ENSG00000115421.8	rs2099613	9.3845e-07	60983969	24.0504	166911	0.0210507	rs62149377	0.754054	SLE
chr2	61107868	61109160	OCR_81530	REL	+	ENSG00000162924.9	rs67574266	1.62858e-06	61108829	22.9899	98216.5	0.028802	rs62149416	0.665389	PSO
chr2	61107868	61109160	OCR_81530	REL	+	ENSG00000162924.9	rs67574266	3.5e-13	61108829	52.9054	3.078e+11	0.130816	rs34695944	0.305984	RA
chr2	61107868	61109160	OCR_81530	AC010733.4	-	ENSG00000228414.2	rs67574266	1.62858e-06	61108829	22.9899	98216.5	0.028802	rs62149416	0.665389	PSO
chr2	61107868	61109160	OCR_81530	AC010733.4	-	ENSG00000228414.2	rs67574266	3.5e-13	61108829	52.9054	3.078e+11	0.130816	rs34695944	0.305984	RA
chr2	71016593	71017860	OCR_82124	FIGLA	-	ENSG00000183733.6	2:71017322:INDEL	0.207615	71017322	1.58798	2.21221	0.000593443	rs112111458	0.760598	ECZ
chr2	71016593	71017860	OCR_82124	FIGLA	-	ENSG00000183733.6	rs115448075	0.391961	71016836	0.73285	1.44257	0.000386981	rs112111458	0.84357	ECZ
chr2	71016593	71017860	OCR_82124	FIGLA	-	ENSG00000183733.6	rs7575830	0.392948	71016817	0.7298	1.44037	0.000386391	rs112111458	0.843956	ECZ
chr2	71016593	71017860	OCR_82124	FIGLA	-	ENSG00000183733.6	rs6546636	0.419861	71016602	0.650704	1.38452	0.000371409	rs112111458	0.854922	ECZ
chr2	71016593	71017860	OCR_82124	FIGLA	-	ENSG00000183733.6	rs7575735	0.420549	71016731	0.648781	1.38319	0.000371051	rs112111458	0.855293	ECZ
chr2	71016593	71017860	OCR_82124	FIGLA	-	ENSG00000183733.6	rs71414837	0.643691	71017329	0.213947	1.1129	0.000298546	rs112111458	0.928989	ECZ
chr2	71016593	71017860	OCR_82124	FIGLA	-	ENSG00000183733.6	rs12713717	0.671649	71017516	0.179679	1.094	0.000293474	rs112111458	0.932534	ECZ
chr2	71114745	71115314	OCR_82130	AC007040.5	+	ENSG00000237751.2	rs7567290	0.48307	71115000	0.491925	1.27885	0.000343063	rs112111458	0.881604	ECZ
chr2	71114745	71115314	OCR_82130	AC007040.5	+	ENSG00000237751.2	rs189535281	0.499401	71114941	0.456209	1.25622	0.000336991	rs112111458	0.88704	ECZ
chr2	71114745	71115314	OCR_82130	AC007040.5	+	ENSG00000237751.2	rs72832724	0.500424	71115105	0.454037	1.25485	0.000336625	rs112111458	0.887713	ECZ
chr2	71115473	71115775	OCR_82131	AC007040.5	+	ENSG00000237751.2	rs34651755	0.383785	71115499	0.758543	1.46122	0.000391984	rs112111458	0.840069	ECZ
chr2	71126646	71127169	OCR_82132	VAX2	+	ENSG00000116035.2	rs1861076	0.512066	71126725	0.429843	1.23976	0.000332577	rs112111458	0.891737	ECZ
chr2	71126646	71127169	OCR_82132	VAX2	+	ENSG00000116035.2	rs2234491	0.625898	71127155	0.237665	1.12618	0.000302107	rs112111458	0.927791	ECZ
chr2	71127219	71128078	OCR_82133	VAX2	+	ENSG00000116035.2	rs2234495	0.061467	71127794	3.49735	5.74699	0.00154168	rs112111458	0.658616	ECZ
chr2	71127219	71128078	OCR_82133	VAX2	+	ENSG00000116035.2	rs62143225	0.182342	71127284	1.77843	2.43322	0.000652732	rs112111458	0.726337	ECZ
chr2	71127219	71128078	OCR_82133	VAX2	+	ENSG00000116035.2	rs2234493	0.246061	71127685	1.34553	1.95965	0.000525692	rs112111458	0.7912	ECZ
chr2	71127219	71128078	OCR_82133	VAX2	+	ENSG00000116035.2	rs2234496	0.2886	71127821	1.12614	1.75606	0.000471077	rs112111458	0.799126	ECZ
chr2	71127219	71128078	OCR_82133	VAX2	+	ENSG00000116035.2	rs2234494	0.702803	71127724	0.145572	1.0755	0.000288512	rs112111458	0.940105	ECZ
chr2	71127219	71128078	OCR_82133	VAX2	+	ENSG00000116035.2	rs13004912	0.751436	71127607	0.100328	1.05144	0.000282059	rs112111458	0.950057	ECZ
chr2	71174794	71176090	OCR_82137	AC007040.7	-	ENSG00000239322.1	2:71175552:INDEL	0.122697	71175552	2.38255	3.29128	0.000882913	rs112111458	0.688545	ECZ
chr2	71174794	71176090	OCR_82137	AC007040.7	-	ENSG00000239322.1	2:71175511:INDEL	0.144656	71175511	2.12772	2.89753	0.000777287	rs112111458	0.697521	ECZ
chr2	71174794	71176090	OCR_82137	AC007040.7	-	ENSG00000239322.1	rs2266919	0.177663	71175842	1.81707	2.48068	0.000665463	rs112111458	0.719757	ECZ
chr2	71174794	71176090	OCR_82137	AC007040.7	-	ENSG00000239322.1	rs12620379	0.479537	71175716	0.499916	1.28397	0.000344436	rs112111458	0.879887	ECZ
chr2	71174794	71176090	OCR_82137	AC007040.7	-	ENSG00000239322.1	rs11126312	0.522367	71175645	0.409217	1.22704	0.000329165	rs112111458	0.895369	ECZ
chr2	100758258	100759353	OCR_83677	AFF3	-	ENSG00000144218.14	rs11900482	1.88306e-07	100758709	27.1496	786063	0.0378388	rs13415583	0.229212	T1D
chr2	100758258	100759353	OCR_83677	AFF3	-	ENSG00000144218.14	rs13003982	1.88306e-07	100759078	27.1496	786063	0.0378388	rs13415583	0.26705	T1D
chr2	100758258	100759353	OCR_83677	AFF3	-	ENSG00000144218.14	rs11123810	1.88306e-07	100759285	27.1496	786063	0.0378388	rs13415583	0.304889	T1D
chr2	102720613	102721294	OCR_83834	IL1R1	+	ENSG00000115594.7	rs11123908	0.075965	102720788	3.14918	4.82877	0.00136289	rs3917265	0.654083	ECZ
chr2	102720613	102721294	OCR_83834	IL1R1	+	ENSG00000115594.7	rs75664449	0.636417	102721116	0.223459	1.11821	0.000315608	rs3917265	0.940382	ECZ
chr2	102758818	102759660	OCR_83841	IL1R1	+	ENSG00000115594.7	rs113898864	0.079336	102758967	3.07845	4.66098	0.00131554	rs3917265	0.664812	ECZ
chr2	102758818	102759660	OCR_83841	IL1R1	+	ENSG00000115594.7	rs1800919	0.080251	102759293	3.05981	4.61774	0.00130333	rs3917265	0.671362	ECZ
chr2	102758818	102759660	OCR_83841	IL1R1	+	ENSG00000115594.7	rs41294844	0.192143	102759341	1.70111	2.34094	0.000660718	rs3917265	0.765602	ECZ
chr2	102758818	102759660	OCR_83841	IL1R1	+	ENSG00000115594.7	rs12613301	0.233328	102759381	1.42046	2.03446	0.000574214	rs3917265	0.780356	ECZ
chr2	102758818	102759660	OCR_83841	IL1R1	+	ENSG00000115594.7	rs190185055	0.272179	102759199	1.20573	1.82735	0.000515759	rs3917265	0.800975	ECZ
chr2	102803397	102803676	OCR_83844	IL1RL2	+	ENSG00000115598.5	rs13017584	0.641902	102803444	0.216263	1.11419	0.000314475	rs3917265	0.941955	ECZ
chr2	102803727	102804674	OCR_83845	IL1RL2	+	ENSG00000115598.5	rs114815603	0.031438	102804595	4.62888	10.1193	0.00285611	rs3917265	0.410591	ECZ
chr2	102803727	102804674	OCR_83845	IL1RL2	+	ENSG00000115598.5	rs114548997	0.031471	102804596	4.62708	10.1102	0.00285354	rs3917265	0.413445	ECZ
chr2	102803727	102804674	OCR_83845	IL1RL2	+	ENSG00000115598.5	rs2241132	0.124735	102804035	2.35684	3.24923	0.000917076	rs3917265	0.720698	ECZ
chr2	102803727	102804674	OCR_83845	IL1RL2	+	ENSG00000115598.5	rs2241131	0.625476	102804041	0.238246	1.12651	0.000317951	rs3917265	0.934999	ECZ
chr2	102803727	102804674	OCR_83845	IL1RL2	+	ENSG00000115598.5	2:102804538:INDEL	0.672755	102804538	0.178396	1.0933	0.000308577	rs3917265	0.949129	ECZ
chr2	102977454	102977830	OCR_83860	IL18R1	+	ENSG00000115604.6	rs6710885	9.145e-11	102977537	41.9962	1.31633e+09	0.00330549	rs13001325	0.936542	IBD
chr2	102977454	102977830	OCR_83860	IL18R1	+	ENSG00000115604.6	rs6710885	1.51348e-06	102977537	23.1308	105387	0.00201445	rs11681718	0.951936	SLE
chr2	102977454	102977830	OCR_83860	IL18R1	+	ENSG00000115604.6	rs6710885	1.442e-05	102977537	18.8127	12165.7	0.0327048	rs13001325	0.0327048	UC
chr2	103034260	103035457	OCR_83865	IL18RAP	+	ENSG00000115607.5	rs1420106	2.616e-12	103035044	48.9573	4.275e+10	0.027265	rs13001325	0.175384	CRO
chr2	103034260	103035457	OCR_83865	IL18RAP	+	ENSG00000115607.5	rs1420106	2.86e-09	103035044	35.2769	4.57391e+07	0.0133011	rs13015714	0.604804	ECZ
chr2	103034260	103035457	OCR_83865	IL18RAP	+	ENSG00000115607.5	rs1420106	2.86e-09	103035044	35.2769	4.57391e+07	0.0111366	rs6419573	0.506386	ECZ
chr2	103089449	103089766	OCR_83871	SLC9A4	+	ENSG00000180251.4	rs4851011	8.17458e-08	103089678	28.7643	1.7623e+06	0.033686	rs11681718	0.289812	SLE
chr2	113672938	113673534	OCR_84440	IL37	+	ENSG00000125571.5	rs4849132	1.184e-06	113673471	23.603	133455	0.0299124	rs1143633	0.715793	ALG
chr2	143886154	143887230	OCR_86252	ARHGAP15	+	ENSG00000075884.8	rs79716587	1.445e-07	143886819	27.6616	1.01543e+06	0.0157102	rs74847330	0.557214	ALG
chr2	202223476	202223760	OCR_92433	ALS2CR12	-	ENSG00000155749.8	rs72934999	1.4e-05	202223524	18.8691	12513.5	0.00406656	rs6715284	0.937543	RA
chr2	204569863	204570398	OCR_92572	CD28	+	ENSG00000178562.13	rs1879877	2.43e-05	204570000	17.8186	7400.37	0.00341874	rs6435203	0.938435	MS
chr2	204732165	204732778	OCR_92615	CTLA4	+	ENSG00000163599.10	rs231775	3.2453e-20	204732714	84.8338	2.63891e+18	0.0893956	rs3087243	0.711697	T1D
chr2	219121715	219122791	OCR_93952	GPBAR1	+	ENSG00000179921.10	rs4674277	3.738e-08	219122781	30.2808	3.76185e+06	0.0296535	rs2382817	0.375326	IBD
chr2	219121715	219122791	OCR_93952	GPBAR1	+	ENSG00000179921.10	rs4674276	5.323e-08	219122780	29.5954	2.67035e+06	0.0210496	rs2382817	0.420769	IBD
chr2	219121715	219122791	OCR_93952	GPBAR1	+	ENSG00000179921.10	rs10932766	4.708e-07	219122090	25.3799	324469	0.00255769	rs2382817	0.938871	IBD
chr2	219121715	219122791	OCR_93952	GPBAR1	+	ENSG00000179921.10	rs4674277	5.68e-06	219122781	20.5931	29630.5	0.0359927	rs2382817	0.352093	UC
chr2	219121715	219122791	OCR_93952	GPBAR1	+	ENSG00000179921.10	rs4674276	1.064e-05	219122780	19.3929	16260.1	0.0197514	rs2382817	0.443563	UC
chr2	219121715	219122791	OCR_93952	GPBAR1	+	ENSG00000179921.10	rs10932766	9.748e-05	219122090	15.1849	1983.16	0.00240899	rs2382817	0.905765	UC
chr2	219134234	219135361	OCR_93954	PNKD	+	ENSG00000127838.9	rs1877714	1.614e-08	219134928	31.911	8.49938e+06	0.066998	rs2382817	0.266179	IBD
chr2	219134234	219135361	OCR_93954	PNKD	+	ENSG00000127838.9	rs1877714	4.993e-06	219134928	20.84	33522.9	0.040721	rs2382817	0.316101	UC
chr2	219134234	219135361	OCR_93954	PNKD	+	ENSG00000127838.9	rs13419763	8.821e-05	219134950	15.3736	2179.44	0.00264741	rs2382817	0.898262	UC
chr2	219134234	219135361	OCR_93954	AAMP	-	ENSG00000127837.5	rs1877714	1.614e-08	219134928	31.911	8.49938e+06	0.066998	rs2382817	0.266179	IBD
chr2	219134234	219135361	OCR_93954	AAMP	-	ENSG00000127837.5	rs1877714	4.993e-06	219134928	20.84	33522.9	0.040721	rs2382817	0.316101	UC
chr2	219134234	219135361	OCR_93954	AAMP	-	ENSG00000127837.5	rs13419763	8.821e-05	219134950	15.3736	2179.44	0.00264741	rs2382817	0.898262	UC
chr2	219151104	219152170	OCR_93958	TMBIM1	-	ENSG00000135926.8	rs2382817	1.902e-07	219151218	27.1302	778494	0.00613664	rs2382817	0.744712	IBD
chr2	219151104	219152170	OCR_93958	TMBIM1	-	ENSG00000135926.8	rs13031757	2.385e-07	219151926	26.6929	625580	0.00493126	rs2382817	0.853743	IBD
chr2	219151104	219152170	OCR_93958	TMBIM1	-	ENSG00000135926.8	rs13005100	3.277e-07	219151767	26.0792	460278	0.00362823	rs2382817	0.904379	IBD
chr2	219151104	219152170	OCR_93958	TMBIM1	-	ENSG00000135926.8	rs13031757	1.873e-05	219151926	18.3143	9481.8	0.0115177	rs2382817	0.580304	UC
chr2	219151104	219152170	OCR_93958	TMBIM1	-	ENSG00000135926.8	rs2382817	2.015e-05	219151218	18.1751	8844.33	0.0107434	rs2382817	0.602019	UC
chr2	219151104	219152170	OCR_93958	TMBIM1	-	ENSG00000135926.8	rs13005100	2.505e-05	219151767	17.7607	7189.43	0.00873314	rs2382817	0.647628	UC
chr2	219155642	219155976	OCR_93959	TMBIM1	-	ENSG00000135926.8	rs2382818	6.086e-08	219155907	29.3358	2.34528e+06	0.0184871	rs2382817	0.439256	IBD
chr2	219155642	219155976	OCR_93959	TMBIM1	-	ENSG00000135926.8	rs2382819	2.562e-07	219155909	26.5546	583779	0.00460175	rs2382817	0.872355	IBD
chr2	219155642	219155976	OCR_93959	TMBIM1	-	ENSG00000135926.8	rs2382818	1.113e-05	219155907	19.307	15575.9	0.0189203	rs2382817	0.462484	UC
chr2	219155642	219155976	OCR_93959	TMBIM1	-	ENSG00000135926.8	rs2382819	4.439e-05	219155909	16.6738	4175.11	0.00507159	rs2382817	0.819018	UC
chr2	219156440	219157509	OCR_93960	TMBIM1	-	ENSG00000135926.8	rs3731860	3.014e-07	219156979	26.2407	498999	0.00393346	rs2382817	0.893115	IBD
chr2	219156440	219157509	OCR_93960	TMBIM1	-	ENSG00000135926.8	rs3731860	5.131e-05	219156979	16.3991	3639.28	0.00442071	rs2382817	0.856565	UC
chr2	219187519	219188715	OCR_93964	PNKD	+	ENSG00000127838.9	rs10193189	5.046e-07	219187603	25.2462	303482	0.00239226	rs2382817	0.946178	IBD
chr2	231035182	231035636	OCR_94763	SP110	-	ENSG00000135899.12	rs9784019	0.4442	231035575	0.585409	1.34005	0.000794676	rs6716753	0.656175	UC
chr2	231035182	231035636	OCR_94763	SP110	-	ENSG00000135899.12	rs9783992	0.4442	231035589	0.585409	1.34005	0.000794676	rs6716753	0.65697	UC
chr2	231035182	231035636	OCR_94763	AC009950.2	+	ENSG00000225963.3	rs9784019	0.4442	231035575	0.585409	1.34005	0.000794676	rs6716753	0.656175	UC
chr2	231035182	231035636	OCR_94763	AC009950.2	+	ENSG00000225963.3	rs9783992	0.4442	231035589	0.585409	1.34005	0.000794676	rs6716753	0.65697	UC
chr2	231084219	231085012	OCR_94765	SP110	-	ENSG00000135899.12	rs11679983	0.02512	231084301	5.01559	12.2779	0.00728103	rs6716753	0.124718	UC
chr2	231084219	231085012	OCR_94765	SP110	-	ENSG00000135899.12	rs74733828	0.0734	231084271	3.2053	4.96618	0.00294505	rs6716753	0.204642	UC
chr2	231084219	231085012	OCR_94765	SP110	-	ENSG00000135899.12	rs7581442	0.8494	231084902	0.0360559	1.01819	0.000603809	rs6716753	0.93972	UC
chr2	231089886	231091247	OCR_94766	SP140	+	ENSG00000079263.14	rs13397985	2.786e-14	231091223	57.88	3.70246e+12	0.0967773	rs6716753	0.331857	CRO
chr2	231089886	231091247	OCR_94766	SP140	+	ENSG00000079263.14	rs10209615	2.845e-13	231089943	53.3124	3.77266e+11	0.00986122	rs6716753	0.943575	CRO
chr2	231089886	231091247	OCR_94766	SP140	+	ENSG00000079263.14	rs13397985	2.066e-06	231091223	22.5327	78146	0.059135	rs6716753	0.059135	IBD
chr2	231089886	231091247	OCR_94766	SP140	+	ENSG00000079263.14	rs10209615	2.326e-05	231089943	17.9018	7714.86	0.00583802	rs6716753	0.903588	IBD
chr2	231089886	231091247	OCR_94766	SP140	+	ENSG00000079263.14	rs11695193	0.1058	231090015	2.61586	3.69851	0.0021933	rs6716753	0.257124	UC
chr2	231089886	231091247	OCR_94766	SP140	+	ENSG00000079263.14	rs13397985	0.6741	231091223	0.176844	1.09245	0.000647845	rs6716753	0.803078	UC
chr2	231089886	231091247	OCR_94766	SP110	-	ENSG00000135899.12	rs13397985	2.786e-14	231091223	57.88	3.70246e+12	0.0967773	rs6716753	0.331857	CRO
chr2	231089886	231091247	OCR_94766	SP110	-	ENSG00000135899.12	rs10209615	2.845e-13	231089943	53.3124	3.77266e+11	0.00986122	rs6716753	0.943575	CRO
chr2	231089886	231091247	OCR_94766	SP110	-	ENSG00000135899.12	rs13397985	2.066e-06	231091223	22.5327	78146	0.059135	rs6716753	0.059135	IBD
chr2	231089886	231091247	OCR_94766	SP110	-	ENSG00000135899.12	rs10209615	2.326e-05	231089943	17.9018	7714.86	0.00583802	rs6716753	0.903588	IBD
chr2	231089886	231091247	OCR_94766	SP110	-	ENSG00000135899.12	rs11695193	0.1058	231090015	2.61586	3.69851	0.0021933	rs6716753	0.257124	UC
chr2	231089886	231091247	OCR_94766	SP110	-	ENSG00000135899.12	rs13397985	0.6741	231091223	0.176844	1.09245	0.000647845	rs6716753	0.803078	UC
chr2	231133544	231133873	OCR_94770	SP140	+	ENSG00000079263.14	rs72988290	0.2993	231133578	1.07731	1.7137	0.00101626	rs6716753	0.530515	UC
chr2	231191211	231192651	OCR_94773	SP140L	+	ENSG00000185404.12	rs58305522	0.2068	231191377	1.59369	2.21853	0.00131563	rs6716753	0.414793	UC
chr2	231191211	231192651	OCR_94773	SP140L	+	ENSG00000185404.12	rs2007304	0.3381	231191756	0.917623	1.58219	0.000938273	rs6716753	0.561658	UC
chr2	231191211	231192651	OCR_94773	SP140L	+	ENSG00000185404.12	rs11685434	0.3495	231191513	0.875272	1.54904	0.000918614	rs6716753	0.570911	UC
chr2	234118535	234118824	OCR_94999	ATG16L1	+	ENSG00000085978.17	rs4663834	0.2628	234118583	1.25395	1.87194	0.000974224	rs6752107	0.625219	UC
chr2	234159833	234160786	OCR_95005	ATG16L1	+	ENSG00000085978.17	rs2289477	0.1391	234160345	2.18789	2.98603	0.00155404	rs6752107	0.51714	UC
chr2	234159833	234160786	OCR_95005	ATG16L1	+	ENSG00000085978.17	rs10199278	0.1564	234160669	2.00869	2.73012	0.00142086	rs6752107	0.539264	UC
chr2	242556787	242557658	OCR_95432	THAP4	-	ENSG00000176946.7	rs36043566	0.001579	242557028	9.98407	147.236	0.00838454	rs76527535	0.55546	UC
chr2	242556787	242557658	OCR_95432	THAP4	-	ENSG00000176946.7	rs139574699	0.01424	242557562	6.00814	20.1675	0.00114846	rs76527535	0.89274	UC
chr2	242575704	242577868	OCR_95434	ATG4B	+	ENSG00000168397.12	rs34691302	0.003172	242577665	8.7058	77.7033	0.00442491	rs76527535	0.807202	UC
chr2	242575704	242577868	OCR_95434	THAP4	-	ENSG00000176946.7	rs34691302	0.003172	242577665	8.7058	77.7033	0.00442491	rs76527535	0.807202	UC
chr20	1612613	1613299	OCR_95576	SIRPG	-	ENSG00000089012.10	rs1535883	4.10453e-10	1612819	39.0625	3.03609e+08	0.341682	rs6043409	0.809291	T1D
chr20	1612613	1613299	OCR_95576	RP11-77C3.3	+	ENSG00000237914.1	rs1535883	4.10453e-10	1612819	39.0625	3.03609e+08	0.341682	rs6043409	0.809291	T1D
chr20	6102944	6104392	OCR_95880	FERMT1	-	ENSG00000101311.11	rs7265879	0.005257	6103341	7.78884	49.1275	0.00101507	rs4256018	0.92615	UC
chr20	44650128	44651836	OCR_97414	SLC12A5	+	ENSG00000124140.8	rs6130997	7.528e-10	44650818	37.8788	1.67985e+08	0.346052	rs1569723	0.818696	CRO
chr20	44650128	44651836	OCR_97414	SLC12A5	+	ENSG00000124140.8	rs6130997	1.286e-06	44650818	23.444	123257	0.0852323	rs1569723	0.187143	IBD
chr20	44650128	44651836	OCR_97414	SLC12A5	+	ENSG00000124140.8	rs6130997	1.46168e-05	44650818	18.7869	12009.4	0.0280783	rs6131014	0.760713	SLE
chr20	44650128	44651836	OCR_97414	SLC12A5	+	ENSG00000124140.8	rs10432735	0.000258187	44650318	13.3517	793.025	0.00185411	rs6131014	0.927954	SLE
chr20	44650128	44651836	OCR_97414	SLC12A5	+	ENSG00000124140.8	rs148087725	0.01471	44651009	5.95087	19.5982	0.00586039	rs1569723	0.410456	UC
chr20	44650128	44651836	OCR_97414	SLC12A5	+	ENSG00000124140.8	rs12479993	0.01901	44651787	5.5006	15.6473	0.00467897	rs1569723	0.45057	UC
chr20	44650128	44651836	OCR_97414	SLC12A5	+	ENSG00000124140.8	rs188065124	0.02529	44650847	5.00392	12.2064	0.00365005	rs1569723	0.543412	UC
chr20	44650128	44651836	OCR_97414	SLC12A5	+	ENSG00000124140.8	rs6130997	0.04549	44650818	4.00038	7.39046	0.00220995	rs1569723	0.627931	UC
chr20	44650128	44651836	OCR_97414	SLC12A5	+	ENSG00000124140.8	rs78823072	0.5572	44651374	0.344575	1.18802	0.000355251	rs1569723	0.925821	UC
chr20	44650128	44651836	OCR_97414	SLC12A5	+	ENSG00000124140.8	rs10432735	0.6341	44650318	0.226542	1.11994	0.000334891	rs1569723	0.94302	UC
chr20	44650128	44651836	OCR_97414	RP11-465L10.10	-	ENSG00000204044.5	rs6130997	7.528e-10	44650818	37.8788	1.67985e+08	0.346052	rs1569723	0.818696	CRO
chr20	44650128	44651836	OCR_97414	RP11-465L10.10	-	ENSG00000204044.5	rs6130997	1.286e-06	44650818	23.444	123257	0.0852323	rs1569723	0.187143	IBD
chr20	44650128	44651836	OCR_97414	RP11-465L10.10	-	ENSG00000204044.5	rs6130997	1.46168e-05	44650818	18.7869	12009.4	0.0280783	rs6131014	0.760713	SLE
chr20	44650128	44651836	OCR_97414	RP11-465L10.10	-	ENSG00000204044.5	rs10432735	0.000258187	44650318	13.3517	793.025	0.00185411	rs6131014	0.927954	SLE
chr20	44650128	44651836	OCR_97414	RP11-465L10.10	-	ENSG00000204044.5	rs148087725	0.01471	44651009	5.95087	19.5982	0.00586039	rs1569723	0.410456	UC
chr20	44650128	44651836	OCR_97414	RP11-465L10.10	-	ENSG00000204044.5	rs12479993	0.01901	44651787	5.5006	15.6473	0.00467897	rs1569723	0.45057	UC
chr20	44650128	44651836	OCR_97414	RP11-465L10.10	-	ENSG00000204044.5	rs188065124	0.02529	44650847	5.00392	12.2064	0.00365005	rs1569723	0.543412	UC
chr20	44650128	44651836	OCR_97414	RP11-465L10.10	-	ENSG00000204044.5	rs6130997	0.04549	44650818	4.00038	7.39046	0.00220995	rs1569723	0.627931	UC
chr20	44650128	44651836	OCR_97414	RP11-465L10.10	-	ENSG00000204044.5	rs78823072	0.5572	44651374	0.344575	1.18802	0.000355251	rs1569723	0.925821	UC
chr20	44650128	44651836	OCR_97414	RP11-465L10.10	-	ENSG00000204044.5	rs10432735	0.6341	44650318	0.226542	1.11994	0.000334891	rs1569723	0.94302	UC
chr20	44717713	44719042	OCR_97419	NCOA5	-	ENSG00000124160.7	rs6104456	0.05409	44718231	3.70992	6.39144	0.00191122	rs1569723	0.661232	UC
chr20	44717713	44719042	OCR_97419	NCOA5	-	ENSG00000124160.7	rs11557123	0.1399	44718227	2.17906	2.97287	0.000888971	rs1569723	0.772921	UC
chr20	44717713	44719042	OCR_97419	NCOA5	-	ENSG00000124160.7	rs2206892	0.1739	44717746	1.849	2.5206	0.00075373	rs1569723	0.798619	UC
chr20	44746399	44747872	OCR_97422	CD40	+	ENSG00000101017.9	rs1883832	3.104e-06	44746982	21.7512	52869.7	0.0365596	rs1569723	0.767534	IBD
chr20	44746399	44747872	OCR_97422	CD40	+	ENSG00000101017.9	rs1883832	0.000119	44746982	14.8085	1642.93	0.0230208	rs4810485	0.760873	MS
chr20	44746399	44747872	OCR_97422	CD40	+	ENSG00000101017.9	rs752118	0.00116	44746738	10.553	195.683	0.00274193	rs4810485	0.950195	MS
chr20	44746399	44747872	OCR_97422	CD40	+	ENSG00000101017.9	rs1883832	2.6e-14	44746982	58.016	3.96283e+12	0.12966	rs4239702	0.684044	RA
chr20	44746399	44747872	OCR_97422	CD40	+	ENSG00000101017.9	rs1800686	0.000253975	44746403	13.3826	805.352	0.00188293	rs6131014	0.9261	SLE
chr20	44746399	44747872	OCR_97422	CD40	+	ENSG00000101017.9	rs1883832	0.07329	44746982	3.20775	4.97227	0.00148685	rs1569723	0.703715	UC
chr20	44746399	44747872	OCR_97422	CD40	+	ENSG00000101017.9	rs752118	0.2811	44746738	1.16176	1.78761	0.000534546	rs1569723	0.862385	UC
chr20	44746399	44747872	OCR_97422	CD40	+	ENSG00000101017.9	rs1800686	0.2849	44746403	1.14357	1.77142	0.000529704	rs1569723	0.863979	UC
chr20	48598727	48599840	OCR_97592	SNAI1	+	ENSG00000124216.3	rs4647955	0.00169187	48599561	9.85699	138.172	0.00794273	rs1056198	0.725957	PSO
chr20	48598727	48599840	OCR_97592	SNAI1	+	ENSG00000124216.3	rs73113648	0.00277934	48598974	8.94695	87.6606	0.00503913	rs1056198	0.832608	PSO
chr20	48598727	48599840	OCR_97592	SNAI1	+	ENSG00000124216.3	rs4647954	0.00415127	48599549	8.21643	60.8381	0.00349725	rs1056198	0.870452	PSO
chr20	50157672	50159549	OCR_97703	NFATC2	-	ENSG00000101096.15	rs3787184	2.719e-08	50157837	30.8984	5.12266e+06	0.0474936	rs3787184	0.638486	ALG
chr20	62317700	62319137	OCR_98228	RTEL1-TNFRSF6B	+	ENSG00000026036.16	rs6062490	1.494e-09	62318856	36.5422	8.6105e+07	0.0393898	rs6011033	0.672599	ALG
chr20	62317700	62319137	OCR_98228	RTEL1	+	ENSG00000258366.3	rs6062490	1.494e-09	62318856	36.5422	8.6105e+07	0.0393898	rs6011033	0.672599	ALG
chr20	62327557	62328921	OCR_98229	TNFRSF6B	+	ENSG00000243509.4	rs2297441	2.409e-08	62327582	31.1333	5.76123e+06	0.00263555	rs6011033	0.943729	ALG
chr20	62327557	62328921	OCR_98229	TNFRSF6B	+	ENSG00000243509.4	rs2738787	9.41e-05	62328375	15.2515	2050.36	0.00604373	rs2256814	0.924202	MS
chr20	62327557	62328921	OCR_98229	TNFRSF6B	+	ENSG00000243509.4	rs1291205	0.000125	62328829	14.7157	1568.47	0.0046233	rs2256814	0.93996	MS
chr20	62338135	62339855	OCR_98231	ARFRP1	-	ENSG00000101246.15	rs6062498	2.478e-12	62339059	49.0636	4.50836e+10	0.00967962	rs6062496	0.942991	CRO
chr20	62338135	62339855	OCR_98231	ARFRP1	-	ENSG00000101246.15	rs6062498	7.07e-08	62339059	29.0454	2.02833e+06	0.0259661	rs4809219	0.717603	ECZ
chr20	62338135	62339855	OCR_98231	ARFRP1	-	ENSG00000101246.15	rs6062498	7.07e-08	62339059	29.0454	2.02833e+06	0.0259646	rs6010620	0.717563	ECZ
chr20	62338135	62339855	OCR_98231	ZGPAT	+	ENSG00000197114.7	rs6062498	2.478e-12	62339059	49.0636	4.50836e+10	0.00967962	rs6062496	0.942991	CRO
chr20	62338135	62339855	OCR_98231	ZGPAT	+	ENSG00000197114.7	rs6062498	7.07e-08	62339059	29.0454	2.02833e+06	0.0259661	rs4809219	0.717603	ECZ
chr20	62338135	62339855	OCR_98231	ZGPAT	+	ENSG00000197114.7	rs6062498	7.07e-08	62339059	29.0454	2.02833e+06	0.0259646	rs6010620	0.717563	ECZ
chr20	62338135	62339855	OCR_98231	RP4-583P15.15	+	ENSG00000273154.1	rs6062498	2.478e-12	62339059	49.0636	4.50836e+10	0.00967962	rs6062496	0.942991	CRO
chr20	62338135	62339855	OCR_98231	RP4-583P15.15	+	ENSG00000273154.1	rs6062498	7.07e-08	62339059	29.0454	2.02833e+06	0.0259661	rs4809219	0.717603	ECZ
chr20	62338135	62339855	OCR_98231	RP4-583P15.15	+	ENSG00000273154.1	rs6062498	7.07e-08	62339059	29.0454	2.02833e+06	0.0259646	rs6010620	0.717563	ECZ
chr20	62368450	62369122	OCR_98235	LIME1	+	ENSG00000203896.5	rs2236510	4.87e-06	62368804	20.8877	34333.4	0.101203	rs2256814	0.652399	MS
chr20	62368450	62369122	OCR_98235	RP4-583P15.14	+	ENSG00000273047.1	rs2236510	4.87e-06	62368804	20.8877	34333.4	0.101203	rs2256814	0.652399	MS
chr20	62370171	62370474	OCR_98237	RP4-583P15.14	+	ENSG00000273047.1	rs1056441	5.769e-13	62370349	51.924	1.88434e+11	0.0404576	rs6062496	0.574031	CRO
chr20	62370171	62370474	OCR_98237	RP4-583P15.14	+	ENSG00000273047.1	rs1056441	1.85e-07	62370349	27.1838	799636	0.0102367	rs4809219	0.825198	ECZ
chr20	62370171	62370474	OCR_98237	RP4-583P15.14	+	ENSG00000273047.1	rs1056441	1.85e-07	62370349	27.1838	799636	0.0102361	rs6010620	0.825152	ECZ
chr20	62370171	62370474	OCR_98237	SLC2A4RG	+	ENSG00000125520.9	rs1056441	5.769e-13	62370349	51.924	1.88434e+11	0.0404576	rs6062496	0.574031	CRO
chr20	62370171	62370474	OCR_98237	SLC2A4RG	+	ENSG00000125520.9	rs1056441	1.85e-07	62370349	27.1838	799636	0.0102367	rs4809219	0.825198	ECZ
chr20	62370171	62370474	OCR_98237	SLC2A4RG	+	ENSG00000125520.9	rs1056441	1.85e-07	62370349	27.1838	799636	0.0102361	rs6010620	0.825152	ECZ
chr20	62370664	62372135	OCR_98238	SLC2A4RG	+	ENSG00000125520.9	rs1741708	3.57e-05	62372041	17.0873	5134.08	0.0151335	rs2256814	0.820758	MS
chr21	34681261	34681539	OCR_100277	AP000295.10	+	ENSG00000272659.1	rs73191853	0.1683	34681312	1.89802	2.58315	0.000651018	rs2284553	0.846807	UC
chr21	34696525	34698015	OCR_100278	IFNAR1	+	ENSG00000142166.8	rs16997869	0.03273	34696867	4.55985	9.77593	0.00246377	rs2284553	0.703643	UC
chr21	34696525	34698015	OCR_100278	IFNAR1	+	ENSG00000142166.8	rs2850015	0.04002	34697264	4.21704	8.23603	0.00207568	rs2284553	0.737185	UC
chr21	34696525	34698015	OCR_100278	IFNAR1	+	ENSG00000142166.8	rs191348317	0.1239	34697719	2.36731	3.2663	0.000823187	rs2284553	0.830229	UC
chr21	34696525	34698015	OCR_100278	IFNAR1	+	ENSG00000142166.8	rs148956118	0.405	34697501	0.69343	1.41441	0.000356467	rs2284553	0.889346	UC
chr21	34696525	34698015	OCR_100278	IFNAR1	+	ENSG00000142166.8	rs144986404	0.643	34697325	0.21484	1.1134	0.000280605	rs2284553	0.941743	UC
chr21	34696525	34698015	OCR_100278	IFNAR1	+	ENSG00000142166.8	rs112371220	0.6671	34697316	0.185013	1.09692	0.000276451	rs2284553	0.946195	UC
chr21	34774864	34776892	OCR_100290	IFNGR2	+	ENSG00000159128.10	rs2284553	1.14e-14	34776695	59.6382	8.91812e+12	0.944046	rs2284553	0.944046	CRO
chr21	34774864	34776892	OCR_100290	IFNGR2	+	ENSG00000159128.10	rs2284553	7.401e-09	34776695	33.4265	1.81328e+07	0.633788	rs2284553	0.633788	IBD
chr21	34774864	34776892	OCR_100290	IFNGR2	+	ENSG00000159128.10	rs8126756	2.7e-07	34775444	26.4532	554933	0.0263419	rs73194058	0.0263419	RA
chr21	34774864	34776892	OCR_100290	IFNGR2	+	ENSG00000159128.10	rs9974603	3.8e-07	34776300	25.7933	398979	0.018939	rs73194058	0.0647136	RA
chr21	34774864	34776892	OCR_100290	IFNGR2	+	ENSG00000159128.10	rs9975473	4.4e-07	34776441	25.5104	346352	0.0164408	rs73194058	0.218937	RA
chr21	34774864	34776892	OCR_100290	IFNGR2	+	ENSG00000159128.10	rs8134145	5.7e-07	34775434	25.0111	269836	0.0128087	rs73194058	0.340408	RA
chr21	34774864	34776892	OCR_100290	IFNGR2	+	ENSG00000159128.10	rs9975155	1.4e-06	34776152	23.2807	113588	0.00539187	rs73194058	0.920108	RA
chr21	34774864	34776892	OCR_100290	IFNGR2	+	ENSG00000159128.10	rs2284553	0.1208	34776695	2.40692	3.33162	0.00083965	rs2284553	0.829406	UC
chr21	34774864	34776892	OCR_100290	IFNGR2	+	ENSG00000159128.10	rs9975155	0.5694	34776152	0.323687	1.17568	0.000296299	rs2284553	0.915589	UC
chr21	34851189	34852929	OCR_100295	TMEM50B	-	ENSG00000142188.12	rs181952865	0.006945	34851703	7.28714	38.228	0.0096344	rs2284553	0.581156	UC
chr21	34851189	34852929	OCR_100295	TMEM50B	-	ENSG00000142188.12	rs2276224	0.5952	34852100	0.282296	1.1516	0.00029023	rs2284553	0.922617	UC
chr21	34863558	34864494	OCR_100297	DNAJC28	-	ENSG00000177692.7	rs28360608	0.07588	34864391	3.15101	4.83318	0.00121808	rs2284553	0.805158	UC
chr21	36420997	36421854	OCR_100438	RUNX1	-	ENSG00000159216.14	rs56045941	7.564e-07	36421331	24.4658	205440	0.0132145	rs73205303	0.922442	ALG
chr21	44845994	44847878	OCR_100825	SIK1	-	ENSG00000142178.7	rs76081789	4.492e-06	44846426	21.0425	37096.1	0.0355212	rs76081789	0.862769	ALG
chr21	44845994	44847878	OCR_100825	SIK1	-	ENSG00000142178.7	rs61696572	1.092e-05	44847870	19.3433	15861.7	0.0151883	rs76081789	0.948067	ALG
chr21	44845994	44847878	OCR_100825	SIK1	-	ENSG00000142178.7	rs58548854	1.79e-05	44847820	18.4006	9900.18	0.00947987	rs76081789	0.957547	ALG
chr21	45626470	45627681	OCR_100900	AP001058.3	-	ENSG00000232698.1	rs55708341	4.61495e-07	45627581	25.4184	330778	0.0377592	rs6518350	0.973275	T1D
chr21	45627930	45628204	OCR_100901	AP001058.3	-	ENSG00000232698.1	rs2838522	0.0002442	45627976	13.4562	835.551	0.0873711	rs4819388	0.819336	CEL
chr22	21921533	21922765	OCR_101345	UBE2L3	+	ENSG00000185651.10	rs11089620	3.094e-15	21922456	62.2056	3.21947e+13	0.00647752	rs2266959	0.903349	CRO
chr22	21921533	21922765	OCR_101345	UBE2L3	+	ENSG00000185651.10	rs11089620	3.73e-15	21922456	61.8375	2.67822e+13	0.0181074	rs2266959	0.374736	IBD
chr22	21921533	21922765	OCR_101345	UBE2L3	+	ENSG00000185651.10	rs140491	6.157e-15	21922364	60.8508	1.63521e+13	0.0110556	rs2266959	0.763408	IBD
chr22	21921533	21922765	OCR_101345	UBE2L3	+	ENSG00000185651.10	rs140490	1.25e-14	21921686	59.4569	8.14533e+12	0.00550706	rs2266959	0.947566	IBD
chr22	21921533	21922765	OCR_101345	UBE2L3	+	ENSG00000185651.10	rs11089620	7.7e-06	21922456	20.0109	22147.4	0.0172606	rs11089637	0.127355	RA
chr22	21921533	21922765	OCR_101345	UBE2L3	+	ENSG00000185651.10	rs140490	1.8e-05	21921686	18.39	9847.78	0.0076749	rs11089637	0.771916	RA
chr22	21921533	21922765	OCR_101345	UBE2L3	+	ENSG00000185651.10	rs140491	2e-05	21922364	18.1893	8907.48	0.00694208	rs11089637	0.934055	RA
chr22	21921533	21922765	OCR_101345	UBE2L3	+	ENSG00000185651.10	rs140491	5.49146e-10	21922364	38.4943	2.2852e+08	0.0129571	rs131658	0.398107	SLE
chr22	21921533	21922765	OCR_101345	UBE2L3	+	ENSG00000185651.10	rs140490	8.35415e-10	21921686	37.6756	1.51761e+08	0.00860487	rs131658	0.751014	SLE
chr22	21921533	21922765	OCR_101345	UBE2L3	+	ENSG00000185651.10	rs11089620	1.71348e-09	21922456	36.275	7.53383e+07	0.00427169	rs131658	0.91297	SLE
chr22	21921533	21922765	OCR_101345	UBE2L3	+	ENSG00000185651.10	rs11089620	6.745e-06	21922456	20.2642	25137.4	0.0190519	rs2266959	0.18297	UC
chr22	21921533	21922765	OCR_101345	UBE2L3	+	ENSG00000185651.10	rs140491	6.787e-06	21922364	20.2524	24988.6	0.0189391	rs2266959	0.220916	UC
chr22	21921533	21922765	OCR_101345	UBE2L3	+	ENSG00000185651.10	rs140490	1.014e-05	21921686	19.4849	17024.9	0.0129033	rs2266959	0.570974	UC
chr22	21983256	21984575	OCR_101347	YDJC	-	ENSG00000161179.9	rs2298429	2.14041e-07	21983260	26.902	694525	0.0175886	rs2283790	0.95472	AS
chr22	21983256	21984575	OCR_101347	YDJC	-	ENSG00000161179.9	rs2298429	0.009827	21983260	6.66599	28.0222	0.0109555	rs2266959	0.942215	JIA
chr22	21983256	21984575	OCR_101347	YDJC	-	ENSG00000161179.9	rs11704601	0.225007	21984568	1.47215	2.08773	0.00776623	rs4821124	0.492066	PSO
chr22	21983256	21984575	OCR_101347	YDJC	-	ENSG00000161179.9	rs2298429	0.383931	21983260	0.758077	1.46088	0.00543439	rs4821124	0.687145	PSO
chr22	21983256	21984575	OCR_101347	YDJC	-	ENSG00000161179.9	rs710177	0.631388	21984205	0.230183	1.12198	0.00417369	rs4821124	0.789723	PSO
chr22	21983256	21984575	OCR_101347	YDJC	-	ENSG00000161179.9	rs710177	1.3e-05	21984205	19.0105	13430.2	0.0104668	rs11089637	0.480471	RA
chr22	21983256	21984575	OCR_101347	YDJC	-	ENSG00000161179.9	rs2298429	5.75714e-10	21983260	38.4021	2.18224e+08	0.0123733	rs131658	0.4613	SLE
chr22	21983256	21984575	OCR_101347	YDJC	-	ENSG00000161179.9	rs2298429	1.398e-05	21983260	18.8719	12530.6	0.00949706	rs2266959	0.788278	UC
chr22	21996215	21997096	OCR_101348	SDF2L1	+	ENSG00000128228.4	rs13054355	0.61773	21997070	0.24907	1.13262	0.00421329	rs4821124	0.78555	PSO
chr22	22005650	22006913	OCR_101350	PPIL2	+	ENSG00000100023.13	rs412596	0.346066	22005719	0.887831	1.5588	0.00579865	rs4821124	0.654017	PSO
chr22	22005650	22006913	OCR_101350	PPIL2	+	ENSG00000100023.13	rs374659	0.35045	22005687	0.871828	1.54638	0.00575244	rs4821124	0.659769	PSO
chr22	22005650	22006913	OCR_101350	PPIL2	+	ENSG00000100023.13	rs861844	0.428318	22006219	0.62738	1.36847	0.00509062	rs4821124	0.702905	PSO
chr22	22005650	22006913	OCR_101350	PPIL2	+	ENSG00000100023.13	rs12628594	0.46562	22005879	0.532351	1.30496	0.0048544	rs4821124	0.717673	PSO
chr22	22005650	22006913	OCR_101350	PPIL2	+	ENSG00000100023.13	rs402548	0.650972	22006008	0.204677	1.10776	0.0041208	rs4821124	0.802144	PSO
chr22	22005650	22006913	OCR_101350	MIR301B	+	ENSG00000212102.1	rs412596	0.346066	22005719	0.887831	1.5588	0.00579865	rs4821124	0.654017	PSO
chr22	22005650	22006913	OCR_101350	MIR301B	+	ENSG00000212102.1	rs374659	0.35045	22005687	0.871828	1.54638	0.00575244	rs4821124	0.659769	PSO
chr22	22005650	22006913	OCR_101350	MIR301B	+	ENSG00000212102.1	rs861844	0.428318	22006219	0.62738	1.36847	0.00509062	rs4821124	0.702905	PSO
chr22	22005650	22006913	OCR_101350	MIR301B	+	ENSG00000212102.1	rs12628594	0.46562	22005879	0.532351	1.30496	0.0048544	rs4821124	0.717673	PSO
chr22	22005650	22006913	OCR_101350	MIR301B	+	ENSG00000212102.1	rs402548	0.650972	22006008	0.204677	1.10776	0.0041208	rs4821124	0.802144	PSO
chr22	22005650	22006913	OCR_101350	MIR130B	+	ENSG00000207751.1	rs412596	0.346066	22005719	0.887831	1.5588	0.00579865	rs4821124	0.654017	PSO
chr22	22005650	22006913	OCR_101350	MIR130B	+	ENSG00000207751.1	rs374659	0.35045	22005687	0.871828	1.54638	0.00575244	rs4821124	0.659769	PSO
chr22	22005650	22006913	OCR_101350	MIR130B	+	ENSG00000207751.1	rs861844	0.428318	22006219	0.62738	1.36847	0.00509062	rs4821124	0.702905	PSO
chr22	22005650	22006913	OCR_101350	MIR130B	+	ENSG00000207751.1	rs12628594	0.46562	22005879	0.532351	1.30496	0.0048544	rs4821124	0.717673	PSO
chr22	22005650	22006913	OCR_101350	MIR130B	+	ENSG00000207751.1	rs402548	0.650972	22006008	0.204677	1.10776	0.0041208	rs4821124	0.802144	PSO
chr22	22019968	22021037	OCR_101352	PPIL2	+	ENSG00000100023.13	rs388371	0.745147	22020694	0.105654	1.05425	0.00392174	rs4821124	0.838211	PSO
chr22	22019968	22021037	OCR_101352	PPIL2	+	ENSG00000100023.13	rs8137775	0.818823	22020100	0.0524682	1.02658	0.00381883	rs4821124	0.872757	PSO
chr22	35653105	35654335	OCR_101929	HMGXB4	+	ENSG00000100281.9	rs2235145	1.254e-05	35654133	19.0793	13899.8	0.00689375	rs138788	0.613893	IBD
chr22	35653105	35654335	OCR_101929	HMGXB4	+	ENSG00000100281.9	rs5755674	2.83e-05	35653473	17.5287	6401.97	0.00317512	rs138788	0.924382	IBD
chr22	35653105	35654335	OCR_101929	HMGXB4	+	ENSG00000100281.9	rs2235145	6.662e-06	35654133	20.2879	25437	0.00272723	rs138788	0.900877	UC
chr22	35695180	35696482	OCR_101932	TOM1	+	ENSG00000100284.16	rs4461	9.825e-06	35695802	19.5451	17545.9	0.00870203	rs138788	0.423961	IBD
chr22	35695180	35696482	OCR_101932	TOM1	+	ENSG00000100284.16	rs4461	4.608e-06	35695802	20.9937	36201	0.0038813	rs138788	0.743002	UC
chr22	35695180	35696482	OCR_101932	RP3-510H16.3	-	ENSG00000273176.1	rs4461	9.825e-06	35695802	19.5451	17545.9	0.00870203	rs138788	0.423961	IBD
chr22	35695180	35696482	OCR_101932	RP3-510H16.3	-	ENSG00000273176.1	rs4461	4.608e-06	35695802	20.9937	36201	0.0038813	rs138788	0.743002	UC
chr22	37534021	37534665	OCR_102077	AL022314.1	+	ENSG00000252142.1	rs2284033	0.002633	37534034	9.04579	92.102	0.101327	rs2284033	0.540291	JIA
chr22	37534021	37534665	OCR_102077	AL022314.1	+	ENSG00000252142.1	rs2284033	0.011	37534034	6.46532	25.347	0.000816185	rs3218251	0.919502	RA
chr22	37545313	37546599	OCR_102080	IL2RB	-	ENSG00000100385.9	rs3218251	0.1148	37545505	2.48687	3.4675	0.0038148	rs2284033	0.678758	JIA
chr22	37545313	37546599	OCR_102080	IL2RB	-	ENSG00000100385.9	rs3218251	5.7e-05	37545505	16.1998	3294.15	0.106073	rs3218251	0.106073	RA
chr22	37562279	37562505	OCR_102084	RP1-151B14.6	+	ENSG00000235237.1	rs12171227	0.7624	37562467	0.0914038	1.04676	0.00115161	rs2284033	0.866824	JIA
chr22	37562630	37563055	OCR_102085	RP1-151B14.6	+	ENSG00000235237.1	rs147908781	0.4186	37562736	0.654242	1.38697	0.00152589	rs2284033	0.78048	JIA
chr22	37562630	37563055	OCR_102085	RP1-151B14.6	+	ENSG00000235237.1	rs13053551	0.4757	37562807	0.508705	1.28963	0.0014188	rs2284033	0.789244	JIA
chr22	37562630	37563055	OCR_102085	RP1-151B14.6	+	ENSG00000235237.1	rs62235060	0.868	37562957	0.0276223	1.01391	0.00111546	rs2284033	0.927034	JIA
chr22	37581984	37583163	OCR_102088	C1QTNF6	-	ENSG00000133466.9	rs5756540	0.8167	37582205	0.0537273	1.02723	0.00113011	rs2284033	0.911296	JIA
chr22	37594525	37596086	OCR_102090	C1QTNF6	-	ENSG00000133466.9	rs62235067	0.01336	37594541	6.1208	21.3361	0.0234732	rs2284033	0.628909	JIA
chr22	37594525	37596086	OCR_102090	C1QTNF6	-	ENSG00000133466.9	rs1001810	0.678	37595486	0.172386	1.09002	0.00119919	rs2284033	0.828307	JIA
chr22	37594525	37596086	OCR_102090	C1QTNF6	-	ENSG00000133466.9	rs71317032	0.7034	37595156	0.144959	1.07517	0.00118286	rs2284033	0.835444	JIA
chr22	37594525	37596086	OCR_102090	C1QTNF6	-	ENSG00000133466.9	rs4140871	0.7397	37594825	0.11039	1.05675	0.00116259	rs2284033	0.846001	JIA
chr22	37594525	37596086	OCR_102090	C1QTNF6	-	ENSG00000133466.9	rs16997918	0.8796	37595916	0.0229451	1.01154	0.00111285	rs2284033	0.937058	JIA
chr22	37625971	37627318	OCR_102099	RAC2	-	ENSG00000128340.10	rs56409124	0.2057	37627019	1.60143	2.22714	0.00245021	rs2284033	0.720475	JIA
chr22	37625971	37627318	OCR_102099	RAC2	-	ENSG00000128340.10	rs9610683	0.6147	37627246	0.253387	1.13507	0.00124876	rs2284033	0.817314	JIA
chr22	37625971	37627318	OCR_102099	RAC2	-	ENSG00000128340.10	rs2284037	0.6224	37626102	0.242509	1.12891	0.00124198	rs2284033	0.818556	JIA
chr22	37625971	37627318	OCR_102099	RAC2	-	ENSG00000128340.10	rs9610682	0.6476	37627234	0.208939	1.11012	0.00122131	rs2284033	0.822247	JIA
chr22	37625971	37627318	OCR_102099	RAC2	-	ENSG00000128340.10	rs9610682	0.0047	37627234	7.9914	54.3639	0.00175055	rs3218251	0.872742	RA
chr22	37625971	37627318	OCR_102099	RAC2	-	ENSG00000128340.10	rs9610683	0.0053	37627246	7.77412	48.7673	0.00157033	rs3218251	0.889229	RA
chr22	37627442	37627880	OCR_102100	RAC2	-	ENSG00000128340.10	rs8135343	0.7345	37627845	0.11502	1.0592	0.00116528	rs2284033	0.843674	JIA
chr22	37627442	37627880	OCR_102100	RAC2	-	ENSG00000128340.10	rs8135343	0.0039	37627845	8.3298	64.3862	0.00207327	rs3218251	0.860162	RA
chr22	41777047	41778566	OCR_102524	TEF	+	ENSG00000167074.10	rs2234053	2.509e-10	41777315	40.0237	4.90949e+08	0.00265161	rs5758343	0.928203	ALG
chr22	41777047	41778566	OCR_102524	TEF	+	ENSG00000167074.10	rs9607799	3.13e-10	41777558	39.5918	3.95588e+08	0.00213657	rs5758343	0.947148	ALG
chr22	41777047	41778566	OCR_102524	TEF	+	ENSG00000167074.10	rs2234052	3.208e-10	41777241	39.5437	3.86193e+08	0.00208583	rs5758343	0.949234	ALG
chr22	41777047	41778566	OCR_102524	TEF	+	ENSG00000167074.10	rs2234058	5.44e-12	41777883	47.5216	2.08542e+10	0.0119899	rs9611565	0.714998	VIT
chr22	41777047	41778566	OCR_102524	TEF	+	ENSG00000167074.10	rs2234059	5.44e-12	41777913	47.5216	2.08542e+10	0.0119899	rs9611565	0.726988	VIT
chr22	41777047	41778566	OCR_102524	TEF	+	ENSG00000167074.10	rs2234053	6.85e-12	41777315	47.0699	1.66378e+10	0.0095657	rs9611565	0.792033	VIT
chr22	41777047	41778566	OCR_102524	TEF	+	ENSG00000167074.10	rs2234052	1.51e-11	41777241	45.5211	7.66992e+09	0.00440972	rs9611565	0.822663	VIT
chr22	41777047	41778566	OCR_102524	TEF	+	ENSG00000167074.10	rs9607799	1.51e-11	41777558	45.5211	7.66992e+09	0.00440972	rs9611565	0.827072	VIT
chr22	41844261	41844814	OCR_102532	TOB2	-	ENSG00000183864.4	rs202657	6.246e-11	41844786	42.7419	1.91111e+09	0.0103219	rs5758343	0.575136	ALG
chr3	17086368	17086763	OCR_103879	PLCL2-AS1	-	ENSG00000226441.2	rs35319117	3.1e-09	17086678	35.12	4.22875e+07	0.00843984	rs4452313	0.867862	RA
chr3	18786726	18786877	OCR_104015	AC144521.1	+	ENSG00000228956.4	rs11721211	1.19e-05	18786871	19.1792	14612.4	0.0319947	rs11719975	0.402989	MS
chr3	27762626	27764178	OCR_104442	EOMES	-	ENSG00000163508.8	rs12715125	2.4e-08	27763427	31.1406	5.7822e+06	0.15009	rs3806624	0.338386	RA
chr3	33072277	33072698	OCR_104842	GLB1	-	ENSG00000170266.11	rs116135711	1.34e-06	33072469	23.3649	118475	0.624567	rs4679081	0.624567	MS
chr3	33137537	33139129	OCR_104856	GLB1	-	ENSG00000170266.11	rs35744352	5.033e-07	33139009	25.2511	304238	0.00616888	rs6776757	0.909542	ALG
chr3	33137537	33139129	OCR_104856	TMPPE	-	ENSG00000188167.4	rs35744352	5.033e-07	33139009	25.2511	304238	0.00616888	rs6776757	0.909542	ALG
chr3	58222721	58224456	OCR_106078	ABHD6	+	ENSG00000163686.9	rs58433687	1.00861e-05	58223292	19.495	17111.8	0.000972282	rs180977001	0.872197	SLE
chr3	58222721	58224456	OCR_106078	ABHD6	+	ENSG00000163686.9	rs1515461	1.24554e-05	58223515	19.0922	13989.9	0.000794899	rs180977001	0.903952	SLE
chr3	58222721	58224456	OCR_106078	ABHD6	+	ENSG00000163686.9	rs12493829	1.04247e-05	58223543	19.432	16580.6	0.0009421	rs180977001	0.875993	SLE
chr3	58318260	58319571	OCR_106084	PXK	+	ENSG00000168297.11	chr3:58318464	8.7e-08	58318464	28.6436	1.65914e+06	0.221746	rs73081554	0.972664	RA
chr3	58318260	58319571	OCR_106084	PXK	+	ENSG00000168297.11	rs180977001	4.25626e-08	58318464	30.029	3.31682e+06	0.18846	rs180977001	0.377117	SLE
chr3	58318260	58319571	OCR_106084	PXK	+	ENSG00000168297.11	chr3:58318477	5.6e-08	58318477	29.4971	2.54224e+06	0.339774	rs73081554	0.750917	RA
chr3	58318260	58319571	OCR_106084	PXK	+	ENSG00000168297.11	rs185407974	4.25167e-08	58318477	30.0311	3.32029e+06	0.188657	rs180977001	0.188657	SLE
chr3	101231002	101232491	OCR_109052	SENP7	-	ENSG00000138468.11	rs16843927	9.02e-06	101231368	19.7085	19039	0.0168123	rs13088318	0.874703	ALG
chr3	119278269	119278847	OCR_110801	CD80	-	ENSG00000121594.7	rs41271391	6.59e-14	119278457	56.1869	1.58791e+12	0.00516821	rs148136154	0.932461	VIT
chr3	119278269	119278847	OCR_110801	CD80	-	ENSG00000121594.7	rs41271393	5.73e-14	119278693	56.4618	1.82192e+12	0.00592988	rs148136154	0.826186	VIT
chr3	141120752	141122138	OCR_111814	ZBTB38	+	ENSG00000177311.6	rs2871960	4.529e-08	141121814	29.9086	3.12298e+06	0.0506979	rs724016	0.618569	CRO
chr3	196358564	196360052	OCR_115883	LINC01063	-	ENSG00000232065.1	rs75366683	1.013e-09	196358636	37.2997	1.25756e+08	0.0079388	rs80064395	0.949458	ALG
chr3	196358564	196360052	OCR_115883	LINC01063	-	ENSG00000232065.1	rs12718062	4.66e-07	196358717	25.3997	327692	0.0330698	rs6583331	0.970721	VIT
chr4	966479	967770	OCR_116017	DGKQ	-	ENSG00000145214.9	rs13137144	1.59946e-07	967445	27.4652	920438	0.0952541	rs4690229	0.439129	SLE
chr4	966479	967770	OCR_116017	DGKQ	-	ENSG00000145214.9	rs113075206	5.06883e-07	967339	25.2375	302164	0.0312703	rs4690229	0.8413	SLE
chr4	980368	981420	OCR_116019	IDUA	+	ENSG00000127415.8	rs4690220	2.07751e-07	980464	26.9596	714836	0.0739768	rs4690229	0.673688	SLE
chr4	980368	981420	OCR_116019	DGKQ	-	ENSG00000145214.9	rs4690220	2.07751e-07	980464	26.9596	714836	0.0739768	rs4690229	0.673688	SLE
chr4	38510939	38511527	OCR_117890	RP11-213G21.1	+	ENSG00000249667.1	rs2703898	0.2529	38511326	1.30721	1.92246	0.000180984	rs11734570	0.939425	UC
chr4	38510939	38511527	OCR_117890	RP11-213G21.1	+	ENSG00000249667.1	rs13435042	0.2612	38511045	1.26239	1.87985	0.000176972	rs11734570	0.940675	UC
chr4	38511677	38512102	OCR_117891	RP11-213G21.1	+	ENSG00000249667.1	rs2637706	0.2471	38511871	1.33963	1.95387	0.000183941	rs11734570	0.938154	UC
chr4	38627174	38627865	OCR_117901	RP11-617D20.1	-	ENSG00000231160.5	rs2637713	0.2514	38627337	1.31551	1.93045	0.000181736	rs11734570	0.9387	UC
chr4	38664646	38666637	OCR_117905	KLF3	+	ENSG00000109787.8	rs112691446	0.2395	38665142	1.38353	1.99724	0.000188024	rs11734570	0.936669	UC
chr4	38664646	38666637	OCR_117905	RP11-617D20.1	-	ENSG00000231160.5	rs112691446	0.2395	38665142	1.38353	1.99724	0.000188024	rs11734570	0.936669	UC
chr4	38664646	38666637	OCR_117905	AC021860.1	-	ENSG00000196355.2	rs112691446	0.2395	38665142	1.38353	1.99724	0.000188024	rs11734570	0.936669	UC
chr4	48143103	48143310	OCR_118431	TEC	-	ENSG00000135605.8	rs17470892	0.00012	48143201	14.7927	1630.01	0.00299278	rs2664035	0.933832	RA
chr4	77609938	77611074	OCR_120076	SHROOM3	+	ENSG00000138771.10	rs4475167	0.0222381	77610963	5.22706	13.6471	0.000290522	rs4859711	0.931448	SLE
chr4	77609938	77611074	OCR_120076	SHROOM3	+	ENSG00000138771.10	rs750743	0.057498	77610347	3.60812	6.07427	0.00012931	rs4859711	0.947968	SLE
chr4	77679527	77679744	OCR_120080	RP11-359D14.2	-	ENSG00000233860.1	rs11284742	0.000804113	77679610	11.2317	274.749	0.0058489	rs4859711	0.858429	SLE
chr4	102267443	102267696	OCR_121597	AP001816.1	+	ENSG00000254531.1	rs2583391	7.67e-05	102267453	15.6379	2487.35	0.00352164	rs1031034	0.802442	VIT
chr4	102267443	102267696	OCR_121597	PPP3CA	-	ENSG00000138814.12	rs2583391	7.67e-05	102267453	15.6379	2487.35	0.00352164	rs1031034	0.802442	VIT
chr4	102268006	102269621	OCR_121599	AP001816.1	+	ENSG00000254531.1	rs2850328	3.3e-05	102268940	17.2367	5532.24	0.00783266	rs1031034	0.755579	VIT
chr4	102268006	102269621	OCR_121599	PPP3CA	-	ENSG00000138814.12	rs2850328	3.3e-05	102268940	17.2367	5532.24	0.00783266	rs1031034	0.755579	VIT
chr4	102958715	102959202	OCR_121625	RP11-498M5.2	-	ENSG00000251309.1	rs13112986	0.2531	102959148	1.30611	1.9214	0.000352333	rs13126505	0.929149	UC
chr4	123377458	123378214	OCR_123130	IL2	-	ENSG00000109471.4	rs2069763	1.227e-18	123377482	77.6551	7.28765e+16	0.0405885	rs4145717	0.925713	ALG
chr4	123377458	123378214	OCR_123130	IL2	-	ENSG00000109471.4	rs2069763	1.227e-18	123377482	77.6551	7.28765e+16	0.05852	rs150254607	0.817558	ALG
chr4	123377458	123378214	OCR_123130	IL2	-	ENSG00000109471.4	rs2069763	9.276e-08	123377482	28.5195	1.5593e+06	0.0226195	rs1479918	0.870286	CRO
chr4	123377458	123378214	OCR_123130	IL2	-	ENSG00000109471.4	rs2069763	0.06044	123377482	3.52527	5.82777	0.00409118	rs1479924	0.855219	JIA
chr5	10760616	10761985	OCR_127617	CTD-2154B17.4	+	ENSG00000272324.1	rs11740255	0.001935	10760890	9.6102	122.131	0.00193018	rs2930047	0.893285	UC
chr5	10760616	10761985	OCR_127617	DAP	-	ENSG00000112977.11	rs11740255	0.001935	10760890	9.6102	122.131	0.00193018	rs2930047	0.893285	UC
chr5	35828259	35828559	OCR_129591	CTD-2113L7.1	-	ENSG00000248969.1	rs77173787	0.145422	35828362	2.11963	2.88583	0.000258438	rs10214237	0.94299	ECZ
chr5	35852337	35852904	OCR_129597	IL7R	+	ENSG00000168685.10	5:35852887:INDEL	0.009453	35852887	6.73517	29.0084	0.00259783	rs10214237	0.774429	ECZ
chr5	35856792	35857417	OCR_129601	IL7R	+	ENSG00000168685.10	rs1353250	0.079157	35857262	3.08213	4.66955	0.000418178	rs10214237	0.921189	ECZ
chr5	35856792	35857417	OCR_129601	IL7R	+	ENSG00000168685.10	rs1494561	0.079196	35857235	3.08132	4.66768	0.000418011	rs10214237	0.921607	ECZ
chr5	35856792	35857417	OCR_129601	IL7R	+	ENSG00000168685.10	rs1353252	0.07927	35857177	3.07981	4.66414	0.000417693	rs10214237	0.922025	ECZ
chr5	35856792	35857417	OCR_129601	IL7R	+	ENSG00000168685.10	rs1353251	0.176489	35857207	1.82694	2.49296	0.000223255	rs10214237	0.949989	ECZ
chr5	38845581	38847187	OCR_129740	OSMR	+	ENSG00000145623.8	rs2292018	0.0002647	38846554	13.305	774.717	0.00846221	rs395157	0.842423	UC
chr5	38845581	38847187	OCR_129740	CTD-2127H9.1	-	ENSG00000249740.1	rs2292018	0.0002647	38846554	13.305	774.717	0.00846221	rs395157	0.842423	UC
chr5	55444092	55444802	OCR_130680	RNA5SP184	-	ENSG00000223003.1	rs7731626	7.3e-24	55444683	101.458	1.07472e+22	0.999999	rs7731626	0.999999	RA
chr5	96211367	96213072	OCR_133128	ERAP2	+	ENSG00000164308.12	rs1230358	0.01042	96211741	6.56164	26.5976	0.00353374	rs1363907	0.440782	UC
chr5	96211367	96213072	OCR_133128	ERAP2	+	ENSG00000164308.12	rs17087117	0.03269	96212113	4.56194	9.78617	0.00130018	rs1363907	0.690723	UC
chr5	96211367	96213072	OCR_133128	ERAP2	+	ENSG00000164308.12	rs17087114	0.03471	96211730	4.45938	9.29701	0.00123519	rs1363907	0.709629	UC
chr5	96211367	96213072	OCR_133128	ERAP2	+	ENSG00000164308.12	rs17087119	0.04028	96212637	4.20605	8.19092	0.00108824	rs1363907	0.764257	UC
chr5	96211367	96213072	OCR_133128	ERAP2	+	ENSG00000164308.12	rs1230360	0.06345	96212895	3.44483	5.59803	0.000743749	rs1363907	0.839169	UC
chr5	96211367	96213072	OCR_133128	ERAP2	+	ENSG00000164308.12	rs968218	0.08493	96212781	2.96794	4.41042	0.000585964	rs1363907	0.867616	UC
chr5	96211367	96213072	OCR_133128	ERAP2	+	ENSG00000164308.12	rs147529760	0.2826	96212741	1.15454	1.78117	0.000236645	rs1363907	0.938402	UC
chr5	96211367	96213072	OCR_133128	ERAP2	+	ENSG00000164308.12	rs17524572	0.3026	96212095	1.0627	1.70123	0.000226024	rs1363907	0.942103	UC
chr5	96231927	96232448	OCR_133133	ERAP2	+	ENSG00000164308.12	rs2548537	0.03248	96232222	4.57298	9.84034	0.00130738	rs1363907	0.689423	UC
chr5	96231927	96232448	OCR_133133	ERAP2	+	ENSG00000164308.12	rs2549785	0.03399	96232286	4.49521	9.46503	0.00125751	rs1363907	0.699658	UC
chr5	96231927	96232448	OCR_133133	ERAP2	+	ENSG00000164308.12	rs2548536	0.03605	96232402	4.39474	9.0013	0.0011959	rs1363907	0.721776	UC
chr5	96231927	96232448	OCR_133133	ERAP2	+	ENSG00000164308.12	rs34701361	0.04071	96232250	4.18805	8.11751	0.00107848	rs1363907	0.765335	UC
chr5	96231927	96232448	OCR_133133	ERAP2	+	ENSG00000164308.12	rs2548538	0.04816	96232142	3.90439	7.04415	0.000935879	rs1363907	0.806186	UC
chr5	96231927	96232448	OCR_133133	ERAP2	+	ENSG00000164308.12	rs773973820	0.04897	96232345	3.87638	6.94617	0.000922862	rs1363907	0.809902	UC
chr5	96232511	96232913	OCR_133134	ERAP2	+	ENSG00000164308.12	rs2303210	0.03196	96232596	4.60064	9.97738	0.00132559	rs1363907	0.682854	UC
chr5	96232511	96232913	OCR_133134	ERAP2	+	ENSG00000164308.12	rs2161657	0.03868	96232806	4.27487	8.47765	0.00112633	rs1363907	0.75101	UC
chr5	96232511	96232913	OCR_133134	ERAP2	+	ENSG00000164308.12	rs2548535	0.04932	96232699	3.86443	6.90478	0.000917363	rs1363907	0.811737	UC
chr5	96270410	96272049	OCR_133139	LNPEP	+	ENSG00000113441.11	rs117273653	0.01627	96271942	5.77346	17.9345	0.00238277	rs1363907	0.560302	UC
chr5	96270410	96272049	OCR_133139	LNPEP	+	ENSG00000113441.11	rs3806940	0.02886	96270725	4.77595	10.8914	0.00144702	rs1363907	0.650102	UC
chr5	96270410	96272049	OCR_133139	LNPEP	+	ENSG00000113441.11	rs2617434	0.07168	96271638	3.24412	5.06352	0.000672735	rs1363907	0.857563	UC
chr5	96270410	96272049	OCR_133139	LNPEP	+	ENSG00000113441.11	rs17550815	0.1989	96271441	1.65043	2.28237	0.000303234	rs1363907	0.917721	UC
chr5	96270410	96272049	OCR_133139	LNPEP	+	ENSG00000113441.11	rs3806939	0.1994	96270629	1.64676	2.27819	0.000302678	rs1363907	0.918024	UC
chr5	96270410	96272049	OCR_133139	LNPEP	+	ENSG00000113441.11	rs3806942	0.2299	96270774	1.44148	2.05595	0.000273152	rs1363907	0.925208	UC
chr5	96270410	96272049	OCR_133139	LNPEP	+	ENSG00000113441.11	rs3806944	0.2299	96271210	1.44148	2.05595	0.000273152	rs1363907	0.925481	UC
chr5	96270410	96272049	OCR_133139	LNPEP	+	ENSG00000113441.11	rs3806943	0.2317	96271069	1.43039	2.04459	0.000271642	rs1363907	0.926297	UC
chr5	96270410	96272049	OCR_133139	LNPEP	+	ENSG00000113441.11	rs3822687	0.2336	96270860	1.41881	2.03278	0.000270073	rs1363907	0.92738	UC
chr5	96270410	96272049	OCR_133139	LNPEP	+	ENSG00000113441.11	rs17550822	0.2417	96271533	1.37065	1.98442	0.000263648	rs1363907	0.931919	UC
chr5	96270410	96272049	OCR_133139	CTD-2260A17.2	-	ENSG00000247121.2	rs117273653	0.01627	96271942	5.77346	17.9345	0.00238277	rs1363907	0.560302	UC
chr5	96270410	96272049	OCR_133139	CTD-2260A17.2	-	ENSG00000247121.2	rs3806940	0.02886	96270725	4.77595	10.8914	0.00144702	rs1363907	0.650102	UC
chr5	96270410	96272049	OCR_133139	CTD-2260A17.2	-	ENSG00000247121.2	rs2617434	0.07168	96271638	3.24412	5.06352	0.000672735	rs1363907	0.857563	UC
chr5	96270410	96272049	OCR_133139	CTD-2260A17.2	-	ENSG00000247121.2	rs17550815	0.1989	96271441	1.65043	2.28237	0.000303234	rs1363907	0.917721	UC
chr5	96270410	96272049	OCR_133139	CTD-2260A17.2	-	ENSG00000247121.2	rs3806939	0.1994	96270629	1.64676	2.27819	0.000302678	rs1363907	0.918024	UC
chr5	96270410	96272049	OCR_133139	CTD-2260A17.2	-	ENSG00000247121.2	rs3806942	0.2299	96270774	1.44148	2.05595	0.000273152	rs1363907	0.925208	UC
chr5	96270410	96272049	OCR_133139	CTD-2260A17.2	-	ENSG00000247121.2	rs3806944	0.2299	96271210	1.44148	2.05595	0.000273152	rs1363907	0.925481	UC
chr5	96270410	96272049	OCR_133139	CTD-2260A17.2	-	ENSG00000247121.2	rs3806943	0.2317	96271069	1.43039	2.04459	0.000271642	rs1363907	0.926297	UC
chr5	96270410	96272049	OCR_133139	CTD-2260A17.2	-	ENSG00000247121.2	rs3822687	0.2336	96270860	1.41881	2.03278	0.000270073	rs1363907	0.92738	UC
chr5	96270410	96272049	OCR_133139	CTD-2260A17.2	-	ENSG00000247121.2	rs17550822	0.2417	96271533	1.37065	1.98442	0.000263648	rs1363907	0.931919	UC
chr5	96272133	96272292	OCR_133140	CTD-2260A17.2	-	ENSG00000247121.2	rs183260325	0.1934	96272199	1.69153	2.32975	0.000309529	rs1363907	0.917113	UC
chr5	96272133	96272292	OCR_133140	CTD-2260A17.2	-	ENSG00000247121.2	rs56009267	0.2862	96272233	1.13741	1.76598	0.000234627	rs1363907	0.938636	UC
chr5	96272465	96272682	OCR_133141	CTD-2260A17.2	-	ENSG00000247121.2	rs3842058	0.01257	96272528	6.22864	22.5182	0.00299174	rs1363907	0.472752	UC
chr5	96272465	96272682	OCR_133141	CTD-2260A17.2	-	ENSG00000247121.2	rs17684739	0.3101	96272507	1.03025	1.67385	0.000222386	rs1363907	0.943442	UC
chr5	96292911	96294186	OCR_133149	LNPEP	+	ENSG00000113441.11	rs2351010	1.858e-14	96293929	58.677	5.51506e+12	0.00994799	rs1363907	0.694841	CRO
chr5	96292911	96294186	OCR_133149	LNPEP	+	ENSG00000113441.11	rs4360063	3.635e-14	96293153	57.3568	2.8502e+12	0.00514116	rs1363907	0.885208	CRO
chr5	96292911	96294186	OCR_133149	LNPEP	+	ENSG00000113441.11	rs1363974	3.998e-14	96293816	57.1696	2.59552e+12	0.00468176	rs1363907	0.924231	CRO
chr5	96292911	96294186	OCR_133149	LNPEP	+	ENSG00000113441.11	rs7716222	4.136e-14	96293006	57.1029	2.51034e+12	0.00452811	rs1363907	0.937835	CRO
chr5	96292911	96294186	OCR_133149	LNPEP	+	ENSG00000113441.11	rs2351010	8.829e-11	96293929	42.065	1.36237e+09	0.00554564	rs1363907	0.820049	IBD
chr5	96292911	96294186	OCR_133149	LNPEP	+	ENSG00000113441.11	rs4360063	1.531e-10	96293153	40.9889	7.95456e+08	0.00323797	rs1363907	0.906631	IBD
chr5	96292911	96294186	OCR_133149	LNPEP	+	ENSG00000113441.11	rs7716222	1.948e-10	96293006	40.5181	6.28638e+08	0.00255892	rs1363907	0.947075	IBD
chr5	96292911	96294186	OCR_133149	LNPEP	+	ENSG00000113441.11	rs7716222	0.0005021	96293006	12.1078	425.781	0.0194063	rs27293	0.254023	JIA
chr5	96292911	96294186	OCR_133149	LNPEP	+	ENSG00000113441.11	rs4360063	0.0005053	96293153	12.096	423.266	0.0192917	rs27293	0.273315	JIA
chr5	96292911	96294186	OCR_133149	LNPEP	+	ENSG00000113441.11	rs2351010	0.0005097	96293929	12.0798	419.859	0.0191364	rs27293	0.369278	JIA
chr5	96292911	96294186	OCR_133149	LNPEP	+	ENSG00000113441.11	rs1363974	0.0005107	96293816	12.0762	419.093	0.0191015	rs27293	0.38838	JIA
chr5	96292911	96294186	OCR_133149	LNPEP	+	ENSG00000113441.11	rs2351010	0.01185	96293929	6.33317	23.7264	0.00315227	rs1363907	0.460526	UC
chr5	96292911	96294186	OCR_133149	LNPEP	+	ENSG00000113441.11	rs4360063	0.01433	96293153	5.99703	20.0557	0.00266458	rs1363907	0.517145	UC
chr5	96292911	96294186	OCR_133149	LNPEP	+	ENSG00000113441.11	rs7716222	0.01605	96293006	5.79739	18.1504	0.00241145	rs1363907	0.55792	UC
chr5	96292911	96294186	OCR_133149	LNPEP	+	ENSG00000113441.11	rs1363974	0.01784	96293816	5.61179	16.5419	0.00219774	rs1363907	0.5761	UC
chr5	96292911	96294186	OCR_133149	LNPEP	+	ENSG00000113441.11	rs62377827	0.03975	96293021	4.22852	8.28347	0.00110053	rs1363907	0.757692	UC
chr5	96292911	96294186	OCR_133149	LNPEP	+	ENSG00000113441.11	rs78766180	0.2768	96293874	1.18273	1.80646	0.000240004	rs1363907	0.937452	UC
chr5	96298173	96298783	OCR_133151	Y_RNA	-	ENSG00000200884.1	rs1423357	1.761e-14	96298758	58.7825	5.81379e+12	0.0104868	rs1363907	0.674435	CRO
chr5	96298173	96298783	OCR_133151	Y_RNA	-	ENSG00000200884.1	rs1423357	1.018e-10	96298758	41.7866	1.18533e+09	0.00482498	rs1363907	0.830257	IBD
chr5	96298173	96298783	OCR_133151	Y_RNA	-	ENSG00000200884.1	rs1423357	0.0004936	96298758	12.1397	432.613	0.0197177	rs27293	0.195622	JIA
chr5	96298173	96298783	OCR_133151	Y_RNA	-	ENSG00000200884.1	rs1423357	0.01299	96298758	6.17047	21.8726	0.00290598	rs1363907	0.481508	UC
chr5	96298173	96298783	OCR_133151	Y_RNA	-	ENSG00000200884.1	rs117857733	0.0293	96298771	4.7499	10.7505	0.0014283	rs1363907	0.65153	UC
chr5	96298173	96298783	OCR_133151	Y_RNA	-	ENSG00000200884.1	rs79128738	0.07436	96298494	3.18405	4.9137	0.00065283	rs1363907	0.858884	UC
chr5	96298991	96299288	OCR_133152	Y_RNA	-	ENSG00000200884.1	rs74724171	0.3051	96299071	1.05177	1.69195	0.000224792	rs1363907	0.942328	UC
chr5	96330296	96330495	OCR_133158	LNPEP	+	ENSG00000113441.11	rs38041	0.0009981	96330302	10.8311	224.875	0.0102494	rs27293	0.754226	JIA
chr5	96330296	96330495	OCR_133158	LNPEP	+	ENSG00000113441.11	rs38041	0.02871	96330302	4.78492	10.9404	0.00145353	rs1363907	0.647205	UC
chr5	100225534	100226904	OCR_133499	ST8SIA4	-	ENSG00000113532.8	rs2400313	7.72179e-05	100226669	15.6252	2471.57	0.00149053	rs2548279	0.889397	SLE
chr5	100225534	100226904	OCR_133499	ST8SIA4	-	ENSG00000113532.8	rs3776174	8.05295e-05	100225625	15.5458	2375.37	0.00143252	rs2548279	0.895185	SLE
chr5	100238844	100239598	OCR_133504	ST8SIA4	-	ENSG00000113532.8	rs3756353	0.000103772	100239187	15.0668	1869.46	0.00112742	rs2548279	0.931008	SLE
chr5	100238844	100239598	OCR_133504	ST8SIA4	-	ENSG00000113532.8	rs3756354	0.00010476	100239533	15.0489	1852.82	0.00111738	rs2548279	0.933247	SLE
chr5	100239913	100240189	OCR_133505	ST8SIA4	-	ENSG00000113532.8	rs3756355	0.000109213	100240001	14.9704	1781.45	0.00107434	rs2548279	0.93874	SLE
chr5	118690931	118691853	OCR_134881	TNFAIP8	+	ENSG00000145779.7	rs3797339	1.901e-05	118691693	18.286	9348.73	0.0184399	rs250308	0.886416	ALG
chr5	131801851	131802800	OCR_135610	Y_RNA	+	ENSG00000202533.1	rs2522057	1.743e-34	131801947	149.989	3.71333e+32	0.0194314	rs2188962	0.871973	CRO
chr5	131801851	131802800	OCR_135610	Y_RNA	+	ENSG00000202533.1	rs2522057	2.25e-26	131801947	112.917	3.30836e+24	0.014065	rs2188962	0.959659	IBD
chr5	131801851	131802800	OCR_135610	Y_RNA	+	ENSG00000202533.1	rs2522057	2.827e-06	131801947	21.9305	57830.2	0.0252098	rs2188962	0.809474	UC
chr5	131977042	131977500	OCR_135624	AC004041.2	-	ENSG00000223442.1	rs2240032	0.0128989	131977127	6.18293	22.0093	0.00186438	rs1295685	0.87793	PSO
chr5	131991713	131992738	OCR_135626	IL13	+	ENSG00000169194.5	rs1881457	0.0250614	131992409	5.01964	12.3027	0.00104215	rs1295685	0.949193	PSO
chr5	131991713	131992738	OCR_135626	AC004041.2	-	ENSG00000223442.1	rs1881457	0.0250614	131992409	5.01964	12.3027	0.00104215	rs1295685	0.949193	PSO
chr5	141487924	141489293	OCR_136121	NDFIP1	+	ENSG00000131507.9	rs6580223	6.068e-12	141489027	47.3075	1.87366e+10	0.0181965	rs6863411	0.254908	CRO
chr5	141487924	141489293	OCR_136121	NDFIP1	+	ENSG00000131507.9	rs3761757	8.746e-12	141488219	46.591	1.30952e+10	0.0127178	rs6863411	0.764373	CRO
chr5	141487924	141489293	OCR_136121	NDFIP1	+	ENSG00000131507.9	rs9324865	1.603e-11	141488792	45.4041	7.23387e+09	0.00702537	rs6863411	0.944584	CRO
chr5	141487924	141489293	OCR_136121	NDFIP1	+	ENSG00000131507.9	rs6580223	6.172e-10	141489027	38.2663	2.039e+08	0.0137374	rs6863411	0.501871	IBD
chr5	141487924	141489293	OCR_136121	NDFIP1	+	ENSG00000131507.9	rs6580223	0.000114	141489027	14.8894	1710.8	0.02423	rs1036207	0.700782	MS
chr5	141487924	141489293	OCR_136121	NDFIP1	+	ENSG00000131507.9	rs6580223	0.0003698	141489027	12.6789	566.492	0.0103689	rs6863411	0.67978	UC
chr5	141487924	141489293	OCR_136121	NDFIP1	+	ENSG00000131507.9	rs3761757	0.012	141488219	6.31087	23.4632	0.000429462	rs6863411	0.94894	UC
chr5	150225744	150227018	OCR_136550	IRGM	+	ENSG00000237693.4	rs10051924	2.006e-20	150226639	85.785	4.24601e+18	0.0176111	rs11741861	0.0634199	CRO
chr5	150225744	150227018	OCR_136550	IRGM	+	ENSG00000237693.4	rs10051804	2.645e-20	150226424	85.2382	3.23031e+18	0.0133983	rs11741861	0.25053	CRO
chr5	150225744	150227018	OCR_136550	IRGM	+	ENSG00000237693.4	rs17111376	3.71e-20	150226899	84.5692	2.3119e+18	0.00958903	rs11741861	0.471037	CRO
chr5	150225744	150227018	OCR_136550	IRGM	+	ENSG00000237693.4	rs10058943	4.011e-20	150226586	84.415	2.14031e+18	0.00887736	rs11741861	0.507612	CRO
chr5	150225744	150227018	OCR_136550	IRGM	+	ENSG00000237693.4	rs11748158	7.685e-20	150226345	83.1295	1.12549e+18	0.0046682	rs11741861	0.866124	CRO
chr5	150225744	150227018	OCR_136550	IRGM	+	ENSG00000237693.4	rs10058821	8.879e-20	150226385	82.844	9.75782e+17	0.00404724	rs11741861	0.905926	CRO
chr5	150225744	150227018	OCR_136550	IRGM	+	ENSG00000237693.4	rs10051924	8.389e-16	150226639	64.7766	116427961984427	0.0128266	rs11741861	0.305118	IBD
chr5	150225744	150227018	OCR_136550	IRGM	+	ENSG00000237693.4	rs10058943	1.014e-15	150226586	64.4031	9.65938e+13	0.0106415	rs11741861	0.362643	IBD
chr5	150225744	150227018	OCR_136550	IRGM	+	ENSG00000237693.4	rs10051804	1.094e-15	150226424	64.2535	8.96314e+13	0.00987452	rs11741861	0.402948	IBD
chr5	150225744	150227018	OCR_136550	IRGM	+	ENSG00000237693.4	rs17111376	1.407e-15	150226899	63.7577	6.99546e+13	0.00770676	rs11741861	0.529815	IBD
chr5	150225744	150227018	OCR_136550	IRGM	+	ENSG00000237693.4	rs10058821	3.313e-15	150226385	62.071	3.00981e+13	0.00331585	rs11741861	0.88603	IBD
chr5	150225744	150227018	OCR_136550	IRGM	+	ENSG00000237693.4	rs10058943	8.26e-06	150226586	19.8767	20709.8	0.0058994	rs11741861	0.520297	UC
chr5	150225744	150227018	OCR_136550	IRGM	+	ENSG00000237693.4	rs10051924	9.148e-06	150226639	19.6816	18784.3	0.00535092	rs11741861	0.576848	UC
chr5	150225744	150227018	OCR_136550	IRGM	+	ENSG00000237693.4	rs10051804	9.969e-06	150226424	19.5174	17303.7	0.00492914	rs11741861	0.632846	UC
chr5	150225744	150227018	OCR_136550	IRGM	+	ENSG00000237693.4	rs17111376	1.082e-05	150226899	19.3609	16001.7	0.00455825	rs11741861	0.689517	UC
chr5	150284214	150284903	OCR_136552	ZNF300	-	ENSG00000145908.8	rs7724036	5.173e-16	150284808	65.7293	187475656329908	0.0206538	rs11741861	0.244895	IBD
chr5	150284214	150284903	OCR_136552	ZNF300	-	ENSG00000145908.8	rs7724036	4.026e-06	150284808	21.2524	41200.9	0.0117365	rs11741861	0.370738	UC
chr5	150466434	150467193	OCR_136566	TNIP1	-	ENSG00000145901.10	rs2233278	2.81098e-14	150467189	57.8625	3.6701e+12	0.114149	rs2233278	0.705853	PSO
chr5	172243991	172244196	OCR_137605	RP11-536N17.1	+	ENSG00000253628.1	rs793007	0.01764	172244155	5.63155	16.7061	0.000517136	rs564349	0.949397	UC
chr5	176738836	176740197	OCR_137779	MXD3	-	ENSG00000213347.6	rs72813185	1.954e-05	176739110	18.2336	9107.06	0.00941844	rs13153019	0.87942	ALG
chr5	176784058	176785366	OCR_137785	RGS14	+	ENSG00000169220.13	rs4075958	9.623e-06	176784512	19.5848	17897.5	0.0185095	rs13153019	0.704599	ALG
chr5	176784058	176785366	OCR_137785	RGS14	+	ENSG00000169220.13	rs4075959	1.443e-05	176784612	18.8114	12157.6	0.0125733	rs13153019	0.835576	ALG
chr5	176784058	176785366	OCR_137785	RGS14	+	ENSG00000169220.13	rs4976688	1.45e-05	176784439	18.8022	12101.7	0.0125154	rs13153019	0.848092	ALG
chr5	176784058	176785366	OCR_137785	RGS14	+	ENSG00000169220.13	rs4976689	8.991e-08	176784448	28.5799	1.60712e+06	0.0770264	rs4976646	0.574468	UC
chr5	176806418	176806724	OCR_137791	SLC34A1	+	ENSG00000131183.6	rs35716097	4.155e-09	176806636	34.5497	3.17964e+07	0.0196337	rs4976646	0.936266	IBD
chr5	176806418	176806724	OCR_137791	SLC34A1	+	ENSG00000131183.6	rs35716097	1.351e-07	176806636	27.7918	1.08369e+06	0.0519392	rs4976646	0.839039	UC
chr6	2902732	2903891	OCR_138177	SERPINB9	-	ENSG00000170542.5	rs12192148	2.56e-06	2903512	22.121	63606.9	0.0598234	rs78521699	0.21704	VIT
chr6	2902732	2903891	OCR_138177	SERPINB9	-	ENSG00000170542.5	rs2236276	3.73e-06	2903584	21.3988	44329.8	0.0416929	rs78521699	0.591972	VIT
chr6	31321992	31322355	OCR_140064	HLA-B	-	ENSG00000234745.5	rs2428494	2.307e-13	31322197	53.7242	4.63521e+11	0.124783	rs2854001	0.966363	ALG
chr6	31321992	31322355	OCR_140064	HLA-B	-	ENSG00000234745.5	rs2428494	2.307e-13	31322197	53.7242	4.63521e+11	0.124465	rs2507978	0.9639	ALG
chr6	31462397	31462817	OCR_140085	MICB	+	ENSG00000204516.5	rs2534683	2.96e-05	31462753	17.4433	6134.41	0.011115	rs145809981	0.820786	ECZ
chr6	31462397	31462817	OCR_140085	MICB	+	ENSG00000204516.5	rs147725457	0.000279	31462600	13.2064	737.438	0.00133617	rs145809981	0.917898	ECZ
chr6	31465142	31466153	OCR_140086	Y_RNA	-	ENSG00000201680.1	rs2534670	2.53e-05	31466051	17.7418	7121.84	0.0129041	rs145809981	0.772061	ECZ
chr6	31465142	31466153	OCR_140086	Y_RNA	-	ENSG00000201680.1	rs2516498	2.54e-05	31465899	17.7343	7095.17	0.0128558	rs145809981	0.784917	ECZ
chr6	31465142	31466153	OCR_140086	Y_RNA	-	ENSG00000201680.1	rs3828912	0.000402	31465726	12.5229	523.971	0.000949389	rs145809981	0.92919	ECZ
chr6	31465142	31466153	OCR_140086	MICB	+	ENSG00000204516.5	rs2534670	2.53e-05	31466051	17.7418	7121.84	0.0129041	rs145809981	0.772061	ECZ
chr6	31465142	31466153	OCR_140086	MICB	+	ENSG00000204516.5	rs2516498	2.54e-05	31465899	17.7343	7095.17	0.0128558	rs145809981	0.784917	ECZ
chr6	31465142	31466153	OCR_140086	MICB	+	ENSG00000204516.5	rs3828912	0.000402	31465726	12.5229	523.971	0.000949389	rs145809981	0.92919	ECZ
chr6	31466212	31466445	OCR_140087	MICB	+	ENSG00000204516.5	rs145809981	8.22e-06	31466217	19.886	20806.1	0.0376988	rs145809981	0.507251	ECZ
chr6	31466212	31466445	OCR_140087	MICB	+	ENSG00000204516.5	rs184155393	0.000258	31466400	13.3531	793.564	0.00143787	rs145809981	0.913791	ECZ
chr6	31495945	31497692	OCR_140088	MCCD1	+	ENSG00000204511.2	rs115090101	0.000485	31497342	12.1725	439.763	0.000796811	rs145809981	0.93604	ECZ
chr6	31508898	31510308	OCR_140089	DDX39B	-	ENSG00000198563.9	rs2523505	2.101e-08	31510002	31.3989	6.57937e+06	0.00773413	rs28895016	0.950161	ALG
chr6	31508898	31510308	OCR_140089	DDX39B	-	ENSG00000198563.9	rs2523506	0.000424	31509967	12.4233	498.534	0.0009033	rs145809981	0.930093	ECZ
chr6	31508898	31510308	OCR_140089	SNORD84	-	ENSG00000265236.1	rs2523505	2.101e-08	31510002	31.3989	6.57937e+06	0.00773413	rs28895016	0.950161	ALG
chr6	31508898	31510308	OCR_140089	SNORD84	-	ENSG00000265236.1	rs2523506	0.000424	31509967	12.4233	498.534	0.0009033	rs145809981	0.930093	ECZ
chr6	31508898	31510308	OCR_140089	DDX39B-AS1	+	ENSG00000234006.1	rs2523505	2.101e-08	31510002	31.3989	6.57937e+06	0.00773413	rs28895016	0.950161	ALG
chr6	31508898	31510308	OCR_140089	DDX39B-AS1	+	ENSG00000234006.1	rs2523506	0.000424	31509967	12.4233	498.534	0.0009033	rs145809981	0.930093	ECZ
chr6	31539640	31540659	OCR_140099	LTA	+	ENSG00000226979.4	rs2844482	0.000299	31539767	13.0766	691.127	0.00125226	rs145809981	0.921687	ECZ
chr6	31542172	31542895	OCR_140100	TNF	+	ENSG00000232810.3	rs1800630	0.000382	31542476	12.6182	549.562	0.000995757	rs145809981	0.926283	ECZ
chr6	32557346	32557794	OCR_140197	HLA-DRB1	-	ENSG00000196126.6	6:32557740:INDEL	0.000124	32557740	14.7309	1580.39	0.00241739	rs4713555	0.586459	ECZ
chr6	32557346	32557794	OCR_140197	HLA-DRB1	-	ENSG00000196126.6	rs9270299	0.001227	32557435	10.4492	185.79	0.000284188	rs4713555	0.82013	ECZ
chr6	32634187	32634671	OCR_140205	HLA-DQB1	-	ENSG00000179344.12	rs1049058	0.004487	32634331	8.07541	56.696	8.6723e-05	rs4713555	0.885966	ECZ
chr6	32634187	32634671	OCR_140205	HLA-DQB1	-	ENSG00000179344.12	6:32634208:INDEL	0.006307	32634208	7.46043	41.688	6.37666e-05	rs4713555	0.90073	ECZ
chr6	32634187	32634671	OCR_140205	HLA-DQB1	-	ENSG00000179344.12	rs1049057	0.014576	32634350	5.96701	19.7569	3.02205e-05	rs4713555	0.93455	ECZ
chr6	32634187	32634671	OCR_140205	HLA-DQB1	-	ENSG00000179344.12	rs9274514	0.017043	32634243	5.69194	17.2183	2.63373e-05	rs4713555	0.939812	ECZ
chr6	32634187	32634671	OCR_140205	HLA-DQB1	-	ENSG00000179344.12	rs3891175	0.018147	32634467	5.5819	16.2965	2.49274e-05	rs4713555	0.941958	ECZ
chr6	32634187	32634671	OCR_140205	HLA-DQB1	-	ENSG00000179344.12	rs3891174	0.018521	32634584	5.54619	16.0081	2.44862e-05	rs4713555	0.942972	ECZ
chr6	32634187	32634671	OCR_140205	HLA-DQB1	-	ENSG00000179344.12	rs3891176	0.018867	32634318	5.5138	15.7509	2.40929e-05	rs4713555	0.943676	ECZ
chr6	36354243	36356317	OCR_140528	RP1-50J22.4	+	ENSG00000224666.2	rs2234067	7.07375e-05	36355654	15.791	2685.2	0.00576238	rs916287	0.793093	SLE
chr6	36354243	36356317	OCR_140528	RP1-50J22.4	+	ENSG00000224666.2	rs3833928	9.19214e-05	36355610	15.2958	2096.22	0.00449845	rs916287	0.855003	SLE
chr6	36354243	36356317	OCR_140528	RP1-50J22.4	+	ENSG00000224666.2	rs2234069	0.000208992	36355483	13.7485	967.031	0.00207523	rs916287	0.951187	SLE
chr6	36354243	36356317	OCR_140528	ETV7	-	ENSG00000010030.9	rs2234067	7.07375e-05	36355654	15.791	2685.2	0.00576238	rs916287	0.793093	SLE
chr6	36354243	36356317	OCR_140528	ETV7	-	ENSG00000010030.9	rs3833928	9.19214e-05	36355610	15.2958	2096.22	0.00449845	rs916287	0.855003	SLE
chr6	36354243	36356317	OCR_140528	ETV7	-	ENSG00000010030.9	rs2234069	0.000208992	36355483	13.7485	967.031	0.00207523	rs916287	0.951187	SLE
chr6	42018030	42018813	OCR_140880	CCND3	-	ENSG00000112576.8	rs201815488	0.0174	42018349	5.65557	16.908	0.00139455	rs67289879	0.873418	UC
chr6	42018030	42018813	OCR_140880	CCND3	-	ENSG00000112576.8	rs62415893	0.1484	42018640	2.08862	2.84144	0.000234358	rs67289879	0.938169	UC
chr6	42018030	42018813	OCR_140880	TAF8	+	ENSG00000137413.11	rs201815488	0.0174	42018349	5.65557	16.908	0.00139455	rs67289879	0.873418	UC
chr6	42018030	42018813	OCR_140880	TAF8	+	ENSG00000137413.11	rs62415893	0.1484	42018640	2.08862	2.84144	0.000234358	rs67289879	0.938169	UC
chr6	44232570	44233730	OCR_141053	NFKBIE	-	ENSG00000146232.10	rs2233434	8e-19	44232920	78.5	1.11186e+17	0.0870075	rs2233424	0.540132	RA
chr6	44232570	44233730	OCR_141053	NFKBIE	-	ENSG00000146232.10	rs2233433	8e-19	44232977	78.5	1.11186e+17	0.0870075	rs2233424	0.62714	RA
chr6	91004695	91007047	OCR_144605	BACH2	-	ENSG00000112182.10	rs1504215	1.767e-12	91006227	49.727	6.28166e+10	0.0252691	rs2134814	0.602049	ALG
chr6	91004695	91007047	OCR_144605	BACH2	-	ENSG00000112182.10	rs1504215	6.03e-05	91006227	16.0932	3123.17	0.0094149	rs72928038	0.834816	MS
chr6	91004695	91007047	OCR_144605	BACH2	-	ENSG00000112182.10	rs1504215	0.001996	91006227	9.55321	118.701	0.00423813	rs1847472	0.902859	UC
chr6	91004695	91007047	OCR_144605	BACH2	-	ENSG00000112182.10	rs6908626	7.24e-10	91005743	37.9549	1.745e+08	0.0106643	rs72928038	0.758897	VIT
chr6	111887095	111888799	OCR_146387	TRAF3IP2	-	ENSG00000056972.14	rs34659678	7.416e-11	111888540	42.4061	1.61569e+09	0.0892525	rs3851228	0.182606	IBD
chr6	111887095	111888799	OCR_146387	TRAF3IP2	-	ENSG00000056972.14	rs34659678	1.661e-11	111888540	45.3345	6.98642e+09	0.17391	rs3851228	0.368109	UC
chr6	126660707	126662079	OCR_147794	CENPW	+	ENSG00000203760.4	rs9388486	1.97318e-09	126661154	36	6.566e+07	0.0159057	rs1538171	0.791268	T1D
chr6	126660707	126662079	OCR_147794	CENPW	+	ENSG00000203760.4	rs9375435	1.97318e-09	126661858	36	6.566e+07	0.0159057	rs1538171	0.807174	T1D
chr6	149866310	149866838	OCR_150024	PPIL4	-	ENSG00000131013.3	rs3813675	1.8e-06	149866780	22.7975	89210	0.0185826	rs9373594	0.665571	RA
chr6	149866310	149866838	OCR_150024	PPIL4	-	ENSG00000131013.3	rs9404042	5.2e-06	149866452	20.7622	32244	0.00671646	rs9373594	0.920821	RA
chr6	159420177	159421600	OCR_150733	RP1-111C20.4	+	ENSG00000271913.1	rs45484795	0.0957521	159421040	2.77491	4.00464	0.00126493	rs2451258	0.817845	PSO
chr6	159420177	159421600	OCR_150733	RP1-111C20.4	+	ENSG00000271913.1	rs56278154	0.104182	159421183	2.64032	3.74402	0.00118261	rs2451258	0.837627	PSO
chr6	159420177	159421600	OCR_150733	RP1-111C20.4	+	ENSG00000271913.1	rs117987087	0.108655	159420433	2.57368	3.62133	0.00114385	rs2451258	0.84113	PSO
chr6	159420177	159421600	OCR_150733	RP1-111C20.4	+	ENSG00000271913.1	rs41267757	0.11272	159420802	2.51567	3.5178	0.00111115	rs2451258	0.851254	PSO
chr6	159420177	159421600	OCR_150733	RSPH3	-	ENSG00000130363.7	rs45484795	0.0957521	159421040	2.77491	4.00464	0.00126493	rs2451258	0.817845	PSO
chr6	159420177	159421600	OCR_150733	RSPH3	-	ENSG00000130363.7	rs56278154	0.104182	159421183	2.64032	3.74402	0.00118261	rs2451258	0.837627	PSO
chr6	159420177	159421600	OCR_150733	RSPH3	-	ENSG00000130363.7	rs117987087	0.108655	159420433	2.57368	3.62133	0.00114385	rs2451258	0.84113	PSO
chr6	159420177	159421600	OCR_150733	RSPH3	-	ENSG00000130363.7	rs41267757	0.11272	159420802	2.51567	3.5178	0.00111115	rs2451258	0.851254	PSO
chr6	159465734	159466553	OCR_150745	TAGAP	-	ENSG00000164691.12	rs1738074	3.144e-08	159465977	30.6166	4.44938e+06	0.781705	rs1738074	0.781705	CEL
chr6	159465734	159466553	OCR_150745	TAGAP	-	ENSG00000164691.12	rs1738074	3.102e-11	159465977	44.1115	3.79037e+09	0.0482572	rs212388	0.707662	CRO
chr6	159465734	159466553	OCR_150745	TAGAP	-	ENSG00000164691.12	rs1738074	0.285192	159465977	1.14218	1.77019	0.000559144	rs2451258	0.918221	PSO
chr6	159485605	159485815	OCR_150750	RP1-111C20.3	-	ENSG00000226032.1	rs212393	0.0427869	159485742	4.1038	7.78268	0.00245828	rs2451258	0.771028	PSO
chr6	159527762	159528352	OCR_150760	RP11-13P5.1	+	ENSG00000224478.1	rs7748054	0.342521	159528132	0.900972	1.56907	0.000495617	rs2451258	0.934375	PSO
chr6	159527762	159528352	OCR_150760	RP11-13P5.1	+	ENSG00000224478.1	rs7772013	0.344463	159528254	0.893752	1.56342	0.000493831	rs2451258	0.934868	PSO
chr6	159528516	159528994	OCR_150761	RP11-13P5.1	+	ENSG00000224478.1	rs7748894	0.225713	159528640	1.46767	2.08306	0.000657967	rs2451258	0.906148	PSO
chr6	159528516	159528994	OCR_150761	RP11-13P5.1	+	ENSG00000224478.1	rs725786	0.337047	159528939	0.921633	1.58537	0.000500764	rs2451258	0.931391	PSO
chr6	167369478	167371074	OCR_151129	RP11-514O12.4	-	ENSG00000249141.1	rs2247314	1.3e-13	167370230	54.8513	8.14362e+11	0.0265036	rs2247314	0.0265036	VIT
chr6	167369478	167371074	OCR_151129	RP11-514O12.4	-	ENSG00000249141.1	rs2247315	1.49e-13	167370211	54.5833	7.12201e+11	0.0231788	rs2247314	0.0748546	VIT
chr6	167369478	167371074	OCR_151129	RP11-514O12.4	-	ENSG00000249141.1	rs2757039	1.49e-13	167370353	54.5833	7.12201e+11	0.0231788	rs2247314	0.0980334	VIT
chr6	167369478	167371074	OCR_151129	RP11-514O12.4	-	ENSG00000249141.1	rs2757041	1.86e-13	167370532	54.1474	5.72741e+11	0.01864	rs2247314	0.156286	VIT
chr6	167369478	167371074	OCR_151129	RP11-514O12.4	-	ENSG00000249141.1	rs2149083	1.41e-12	167370971	50.1698	7.83858e+10	0.00255108	rs2247314	0.732279	VIT
chr6	167369478	167371074	OCR_151129	RP11-514O12.4	-	ENSG00000249141.1	rs2149084	1.41e-12	167370988	50.1698	7.83858e+10	0.00255108	rs2247314	0.73483	VIT
chr6	167369478	167371074	OCR_151129	RP11-514O12.4	-	ENSG00000249141.1	rs2769346	1.41e-12	167370999	50.1698	7.83858e+10	0.00255108	rs2247314	0.737382	VIT
chr6	167369478	167371074	OCR_151129	RP11-514O12.4	-	ENSG00000249141.1	rs2247325	2.05e-12	167369992	49.4355	5.42984e+10	0.00176715	rs2247314	0.914176	VIT
chr6	167369478	167371074	OCR_151129	RP11-514O12.4	-	ENSG00000249141.1	rs150189585	2.09e-12	167370686	49.3976	5.32789e+10	0.00173397	rs2247314	0.91591	VIT
chr6	167369478	167371074	OCR_151129	RP11-514O12.4	-	ENSG00000249141.1	rs1044059	2.58e-12	167369897	48.9844	4.33349e+10	0.00141034	rs2247314	0.945833	VIT
chr6	167369478	167371074	OCR_151129	RNASET2	-	ENSG00000026297.11	rs2247314	1.3e-13	167370230	54.8513	8.14362e+11	0.0265036	rs2247314	0.0265036	VIT
chr6	167369478	167371074	OCR_151129	RNASET2	-	ENSG00000026297.11	rs2247315	1.49e-13	167370211	54.5833	7.12201e+11	0.0231788	rs2247314	0.0748546	VIT
chr6	167369478	167371074	OCR_151129	RNASET2	-	ENSG00000026297.11	rs2757039	1.49e-13	167370353	54.5833	7.12201e+11	0.0231788	rs2247314	0.0980334	VIT
chr6	167369478	167371074	OCR_151129	RNASET2	-	ENSG00000026297.11	rs2757041	1.86e-13	167370532	54.1474	5.72741e+11	0.01864	rs2247314	0.156286	VIT
chr6	167369478	167371074	OCR_151129	RNASET2	-	ENSG00000026297.11	rs2149083	1.41e-12	167370971	50.1698	7.83858e+10	0.00255108	rs2247314	0.732279	VIT
chr6	167369478	167371074	OCR_151129	RNASET2	-	ENSG00000026297.11	rs2149084	1.41e-12	167370988	50.1698	7.83858e+10	0.00255108	rs2247314	0.73483	VIT
chr6	167369478	167371074	OCR_151129	RNASET2	-	ENSG00000026297.11	rs2769346	1.41e-12	167370999	50.1698	7.83858e+10	0.00255108	rs2247314	0.737382	VIT
chr6	167369478	167371074	OCR_151129	RNASET2	-	ENSG00000026297.11	rs2247325	2.05e-12	167369992	49.4355	5.42984e+10	0.00176715	rs2247314	0.914176	VIT
chr6	167369478	167371074	OCR_151129	RNASET2	-	ENSG00000026297.11	rs150189585	2.09e-12	167370686	49.3976	5.32789e+10	0.00173397	rs2247314	0.91591	VIT
chr6	167369478	167371074	OCR_151129	RNASET2	-	ENSG00000026297.11	rs1044059	2.58e-12	167369897	48.9844	4.33349e+10	0.00141034	rs2247314	0.945833	VIT
chr6	167411292	167411660	OCR_151135	MIR3939	-	ENSG00000265828.1	rs239936	1.152e-20	167411616	86.8819	7.34785e+18	0.00114157	rs1819333	0.930242	CRO
chr6	167411292	167411660	OCR_151135	MIR3939	-	ENSG00000265828.1	rs239936	6.604e-05	167411616	15.9211	2865.58	0.00292633	rs1819333	0.889945	UC
chr6	167411292	167411660	OCR_151135	FGFR1OP	+	ENSG00000213066.7	rs239936	1.152e-20	167411616	86.8819	7.34785e+18	0.00114157	rs1819333	0.930242	CRO
chr6	167411292	167411660	OCR_151135	FGFR1OP	+	ENSG00000213066.7	rs239936	6.604e-05	167411616	15.9211	2865.58	0.00292633	rs1819333	0.889945	UC
chr6	167411292	167411660	OCR_151135	RP11-517H2.6	+	ENSG00000272980.1	rs239936	1.152e-20	167411616	86.8819	7.34785e+18	0.00114157	rs1819333	0.930242	CRO
chr6	167411292	167411660	OCR_151135	RP11-517H2.6	+	ENSG00000272980.1	rs239936	6.604e-05	167411616	15.9211	2865.58	0.00292633	rs1819333	0.889945	UC
chr6	167411754	167413521	OCR_151136	MIR3939	-	ENSG00000265828.1	rs239933	4.817e-21	167413230	88.6065	1.74045e+19	0.00270397	rs1819333	0.91638	CRO
chr6	167411754	167413521	OCR_151136	MIR3939	-	ENSG00000265828.1	rs239933	1.355e-05	167413230	18.9315	12909.6	0.0131833	rs1819333	0.796809	UC
chr6	167411754	167413521	OCR_151136	MIR3939	-	ENSG00000265828.1	rs239933	3.74e-13	167413230	52.7752	2.88391e+11	0.00938576	rs2247314	0.393282	VIT
chr6	167411754	167413521	OCR_151136	MIR3939	-	ENSG00000265828.1	rs239934	7.57e-13	167412048	51.3906	1.4432e+11	0.00469694	rs2247314	0.574342	VIT
chr6	167411754	167413521	OCR_151136	MIR3939	-	ENSG00000265828.1	rs239935	9.16e-13	167411788	51.0163	1.1969e+11	0.00389535	rs2247314	0.582244	VIT
chr6	167411754	167413521	OCR_151136	FGFR1OP	+	ENSG00000213066.7	rs239933	4.817e-21	167413230	88.6065	1.74045e+19	0.00270397	rs1819333	0.91638	CRO
chr6	167411754	167413521	OCR_151136	FGFR1OP	+	ENSG00000213066.7	rs239933	1.355e-05	167413230	18.9315	12909.6	0.0131833	rs1819333	0.796809	UC
chr6	167411754	167413521	OCR_151136	FGFR1OP	+	ENSG00000213066.7	rs239933	3.74e-13	167413230	52.7752	2.88391e+11	0.00938576	rs2247314	0.393282	VIT
chr6	167411754	167413521	OCR_151136	FGFR1OP	+	ENSG00000213066.7	rs239934	7.57e-13	167412048	51.3906	1.4432e+11	0.00469694	rs2247314	0.574342	VIT
chr6	167411754	167413521	OCR_151136	FGFR1OP	+	ENSG00000213066.7	rs239935	9.16e-13	167411788	51.0163	1.1969e+11	0.00389535	rs2247314	0.582244	VIT
chr6	167411754	167413521	OCR_151136	RP11-517H2.6	+	ENSG00000272980.1	rs239933	4.817e-21	167413230	88.6065	1.74045e+19	0.00270397	rs1819333	0.91638	CRO
chr6	167411754	167413521	OCR_151136	RP11-517H2.6	+	ENSG00000272980.1	rs239933	1.355e-05	167413230	18.9315	12909.6	0.0131833	rs1819333	0.796809	UC
chr6	167411754	167413521	OCR_151136	RP11-517H2.6	+	ENSG00000272980.1	rs239933	3.74e-13	167413230	52.7752	2.88391e+11	0.00938576	rs2247314	0.393282	VIT
chr6	167411754	167413521	OCR_151136	RP11-517H2.6	+	ENSG00000272980.1	rs239934	7.57e-13	167412048	51.3906	1.4432e+11	0.00469694	rs2247314	0.574342	VIT
chr6	167411754	167413521	OCR_151136	RP11-517H2.6	+	ENSG00000272980.1	rs239935	9.16e-13	167411788	51.0163	1.1969e+11	0.00389535	rs2247314	0.582244	VIT
chr6	167411754	167413521	OCR_151136	RP1-167A14.2	-	ENSG00000227598.1	rs239933	4.817e-21	167413230	88.6065	1.74045e+19	0.00270397	rs1819333	0.91638	CRO
chr6	167411754	167413521	OCR_151136	RP1-167A14.2	-	ENSG00000227598.1	rs239933	1.355e-05	167413230	18.9315	12909.6	0.0131833	rs1819333	0.796809	UC
chr6	167411754	167413521	OCR_151136	RP1-167A14.2	-	ENSG00000227598.1	rs239933	3.74e-13	167413230	52.7752	2.88391e+11	0.00938576	rs2247314	0.393282	VIT
chr6	167411754	167413521	OCR_151136	RP1-167A14.2	-	ENSG00000227598.1	rs239934	7.57e-13	167412048	51.3906	1.4432e+11	0.00469694	rs2247314	0.574342	VIT
chr6	167411754	167413521	OCR_151136	RP1-167A14.2	-	ENSG00000227598.1	rs239935	9.16e-13	167411788	51.0163	1.1969e+11	0.00389535	rs2247314	0.582244	VIT
chr7	6486881	6488281	OCR_151638	DAGLB	-	ENSG00000164535.10	rs4724806	4.704e-05	6487131	16.5638	3951.73	0.0111133	rs11768365	0.716277	UC
chr7	6486881	6488281	OCR_151638	DAGLB	-	ENSG00000164535.10	rs3828944	4.302e-05	6487156	16.7333	4301.13	0.0120959	rs11768365	0.670662	UC
chr7	6486881	6488281	OCR_151638	DAGLB	-	ENSG00000164535.10	rs3750037	3.507e-05	6487293	17.1211	5221.62	0.0146845	rs11768365	0.593487	UC
chr7	6486881	6488281	OCR_151638	DAGLB	-	ENSG00000164535.10	rs7807755	9.222e-05	6488097	15.2897	2089.81	0.00587708	rs11768365	0.929403	UC
chr7	28218921	28220788	OCR_153544	JAZF1-AS1	+	ENSG00000234336.2	rs849333	5.87293e-07	28219812	24.9535	262173	0.0140826	rs10245867	0.912634	SLE
chr7	28218921	28220788	OCR_153544	JAZF1-AS1	+	ENSG00000234336.2	chr7:28219956	9.9e-06	28219956	19.5306	17418.9	0.0405508	rs67250450	0.659999	RA
chr7	28218921	28220788	OCR_153544	JAZF1-AS1	+	ENSG00000234336.2	rs565938051	9.06988e-09	28220442	33.031	1.48799e+07	0.799275	rs10245867	0.799275	SLE
chr7	28218921	28220788	OCR_153544	JAZF1	-	ENSG00000153814.7	rs849333	5.87293e-07	28219812	24.9535	262173	0.0140826	rs10245867	0.912634	SLE
chr7	28218921	28220788	OCR_153544	JAZF1	-	ENSG00000153814.7	chr7:28219956	9.9e-06	28219956	19.5306	17418.9	0.0405508	rs67250450	0.659999	RA
chr7	28218921	28220788	OCR_153544	JAZF1	-	ENSG00000153814.7	rs565938051	9.06988e-09	28220442	33.031	1.48799e+07	0.799275	rs10245867	0.799275	SLE
chr7	37381876	37383110	OCR_154003	ELMO1	-	ENSG00000155849.11	rs60600003	2.53e-08	37382465	31.0382	5.49363e+06	0.168281	rs60600003	0.168281	MS
chr7	50244196	50244498	OCR_154641	AC020743.3	-	ENSG00000231681.1	rs10232726	0.007277	50244317	7.20329	36.6585	0.00169182	rs1456896	0.900447	UC
chr7	50245009	50245438	OCR_154642	AC020743.3	-	ENSG00000231681.1	rs17552613	0.01706	50245295	5.69019	17.2032	0.00079394	rs1456896	0.949164	UC
chr7	50343235	50344845	OCR_154664	IKZF1	+	ENSG00000185811.12	rs11506039	0.01265	50344544	6.21741	22.392	0.00103341	rs1456896	0.928201	UC
chr7	139761861	139763235	OCR_161271	PARP12	-	ENSG00000059378.8	rs35064805	6.59e-06	139761896	20.3087	25702.8	0.0292964	rs10155912	0.623073	VIT
chr8	11323681	11325454	OCR_162945	FAM167A	-	ENSG00000154319.10	rs2618432	7.47e-05	11324482	15.6879	2550.28	0.00583077	rs75637965	0.931249	MS
chr8	11349463	11350473	OCR_162946	BLK	+	ENSG00000136573.8	rs2251056	2e-05	11349576	18.1893	8907.48	0.0203655	rs75637965	0.572427	MS
chr8	27949953	27951105	OCR_163781	ELP3	+	ENSG00000134014.12	rs11786004	0.000201294	27951025	13.819	1001.73	0.00560445	rs351758	0.766717	SLE
chr8	27949953	27951105	OCR_163781	ELP3	+	ENSG00000134014.12	rs2305452	0.00020196	27950535	13.8128	998.625	0.00558709	rs351758	0.772304	SLE
chr8	27949953	27951105	OCR_163781	ELP3	+	ENSG00000134014.12	rs2305451	0.000213188	27950670	13.7111	949.145	0.00531026	rs351758	0.799592	SLE
chr8	27949953	27951105	OCR_163781	ELP3	+	ENSG00000134014.12	rs28507502	0.000243237	27950008	13.4636	838.654	0.00469208	rs351758	0.829369	SLE
chr8	79577510	79579138	OCR_166167	ZC2HC1A	+	ENSG00000104427.7	rs3808619	1.09e-09	79577726	37.1568	1.17086e+08	0.0337319	rs1021156	0.58724	MS
chr8	79577510	79579138	OCR_166167	ZC2HC1A	+	ENSG00000104427.7	rs3808619	0.000327054	79577726	12.9087	635.468	0.00687512	rs1966115	0.531355	SLE
chr8	79650521	79651342	OCR_166172	IL7	-	ENSG00000104432.8	rs2583778	0.000387208	79651141	12.5929	542.651	0.00587093	rs1966115	0.64223	SLE
chr9	93926513	93927489	OCR_174397	RP11-305L7.3	-	ENSG00000237422.1	rs77360493	0.0001562	93926535	14.296	1271.53	0.00730206	rs4743820	0.792054	UC
chr9	123638157	123640172	OCR_175718	PHF19	-	ENSG00000119403.9	rs73541868	2.3e-09	123639264	35.7014	5.65533e+07	0.0287499	rs10985070	0.219284	RA
chr9	123690626	123691707	OCR_175737	TRAF1	-	ENSG00000056558.6	rs1930786	1.777e-06	123691469	22.8222	90319.3	0.0103218	rs10760123	0.678031	ALG
chr9	123690626	123691707	OCR_175737	TRAF1	-	ENSG00000056558.6	rs7028641	3.263e-06	123691141	21.6553	50396.2	0.00575935	rs10760123	0.915758	ALG
chr9	123690626	123691707	OCR_175737	TRAF1	-	ENSG00000056558.6	rs3761849	5.549e-06	123690957	20.6378	30299.7	0.0034627	rs10760123	0.928631	ALG
chr9	123690626	123691707	OCR_175737	TRAF1	-	ENSG00000056558.6	rs1930785	5e-09	123691237	34.1894	2.65545e+07	0.0134995	rs10985070	0.552542	RA
chr9	131580373	131581866	OCR_176151	ENDOG	+	ENSG00000167136.6	rs77144778	2.107e-08	131580487	31.3934	6.56118e+06	0.0992929	rs12551834	0.826673	ALG

## Sheet: Sheet2
rsid
rs112603604
rs190796582
rs6603785		1151 unique SNPs
rs139775692
rs61766198
rs2649593
rs2275915
rs34442823
rs2477678
rs2227312
rs2227313
rs4870
rs1886730
rs745368
rs2859387
rs35733104
chr1:8002510
rs17523802
rs35675666
rs3766606
rs161800
rs161802
rs301807
rs71514255
rs2306627
rs696616
rs74905404
rs111455542
rs73001391
rs7528684
rs12036607
rs12037395
rs7410867
rs4656971
rs4656972
rs2070901
rs11811241
rs16845082
rs1323296
rs2984920
rs3024493
rs12403599
rs12403006
rs34743335
rs12404886
rs73605992
rs71499653
rs61839728
rs2275806
rs306587
rs306589
rs306588
rs4934730
rs16935880
rs12765038
rs1057108
rs12246033
rs12264889
rs1864836
rs11000780
rs2271271
rs529423655
rs551098394
10:75560383
rs569098534
rs368625457
rs148636613
rs530542206
rs537530036
rs35611463
rs12775558
rs570306577
rs570545687
rs564554844
rs549655525
rs113189683
rs16930949
rs532398214
rs572442527
rs527295252
rs568058204
rs530254939
rs531665648
rs559201147
rs562773274
rs58048583
rs2227552
rs2459449
rs201407499
rs2227551
10:75668787
rs548248917
rs145348571
rs1916341
rs371199984
rs72816319
rs2227580
rs1916340
rs2227579
rs556245855
rs549463604
rs568057544
rs78289523
rs539278940
rs527937347
rs531449884
rs557545378
rs559872565
rs2688619
rs193109622
rs575029676
rs538013467
rs3812624
rs144310550
rs551523796
rs371489159
rs3812625
rs547337176
rs559106123
rs76109311
rs2233713
rs2233715
rs143361357
rs74143132
rs77244906
rs116857892
rs4934189
rs17618331
rs116848392
rs10883371
rs10883373
rs2296590
rs3818470
rs143273538
rs138018204
rs41291906
rs11594185
rs1889568
rs28411397
rs11245348
rs2683599
rs2277264
rs907611
rs907612
rs907613
rs12365962
rs2592555
rs12291147
rs2285734
rs12294981
rs150433412
rs12285866
rs1010236627
rs113460854
rs75307228
rs78601160
rs2237996
rs3019540
rs56103919
rs2237997
rs28546162
rs12418337
rs545230
rs546241
rs174538
rs174561
rs3834458
rs968567
rs5792235
rs693672
rs174466
rs2510066
rs887314
rs9787810
rs479777
rs663743
rs11601860
rs2078267
rs11227302
rs72924752
rs59416249
rs667555
rs7947929
rs7947741
rs117231452
rs1939212
rs149943776
rs57494551
rs199725450
rs630923
rs149114341
rs73575428
rs76598569
rs74584888
rs151213883
rs12223943
rs146647148
rs113559360
rs142348685
rs71584815
rs147997492
rs34819705
rs767455
rs4149622
rs2234649
rs56128666
rs111317117
rs55859427
rs55797039
rs3759324
rs72645157
rs879605
rs28999107
rs10849448
rs3759335
rs3759336
rs2250246
rs2286596
rs11569359
rs3136551
rs25680
rs2534719
rs11064195
rs11569388
rs753359926
rs2532502
rs7132503
rs2041385
rs2041384
rs7390
rs2534711
rs2244083
rs2243977
rs71584828
rs1045548
rs2534710
rs142707363
rs75100764
rs2072378
rs11064213
rs76498272
rs2072377
rs12422771
rs73042333
rs2534721
rs10844503
rs12304510
rs10492165
rs148066105
rs78322254
rs113736796
rs2544034
rs772920
rs10876864
rs705704
rs705705
rs1131017
rs7297175
rs41423244
rs2695789
rs80317430
rs79824801
rs2371494
rs11358218
rs4760168
rs11172335
rs10747783
rs187447202
rs78836744
rs149558972
rs551215733
rs79735780
rs59781510
rs150482158
rs55637283
rs55853686
12:68383552
rs532703
rs2393716
rs641760
rs1260294
rs1626899
rs12298615
rs34616325
rs35594717
rs183583501
rs143265763
rs77085139
rs9533054
rs115385546
rs3816312
rs9562518
rs9567295
rs3818818
rs76474346
rs73467552
rs77813120
rs78919027
rs7999434
rs12867732
rs2580188
rs117908129
rs3759443
rs16956449
rs7993715
rs72649597
rs7998034
rs143052672
rs148666432
rs3809449
rs28365850
rs941653
rs1048990
rs3825655
rs3783799
rs2296275
chr14:61943759
rs1051533
rs2236262
rs4645854
rs73312836
rs74074328
rs71421262
rs201273005
rs1051750
rs71421264
rs79589176
rs578168050
rs558216476
rs77363088
rs550722626
rs3826042
rs374583096
rs17861099
rs36090160
rs4646417
rs3826041
rs35686934
rs552361034
rs564160819
rs117001954
rs141856776
rs139529999
rs183551129
rs201211427
rs575452209
rs34755093
rs528173704
rs186442904
rs1378941
rs8028495
15:75080241
rs34896354
rs371065814
rs555827757
rs111962183
rs542007111
rs546941347
rs186389081
rs78386305
rs372830649
rs186716518
rs2301249
rs35625871
rs35015218
rs34029216
rs76196923
rs367647321
rs117209666
rs111973536
rs550228921
rs74025850
rs532318141
rs2290574
rs545504701
rs10220784
rs551757357
rs186390658
rs554261102
rs139591283
rs11857695
rs564521289
rs146102692
rs11853271
rs243332
rs33977706
rs193778
rs72773819
rs7191700
rs12149160
rs918737
rs11645239
rs151234
rs153109
rs67340371
rs7191618
rs3859172
rs1458202
rs4889599
rs72800847
rs58726213
rs12445650
rs4783653
rs1728773
rs1645936
rs1645935
rs1728770
rs1728769
rs1645975
rs1645934
rs1170445
rs1170444
rs1170443
rs1182968
rs1170442
rs8056814
rs3809849
rs12603519
rs72634016
chr17:5185402
rs11557466
rs12603332
rs3752026
rs34129849
rs7219855
rs4029774
rs3736164
rs112502960
rs6503770
rs2235092
rs74390925
rs4794673
rs111769401
rs9911119
rs76409794
rs12943902
rs56007395
rs79869968
rs78541128
rs9908045
rs9908349
rs3829575
rs1071664
rs2847260
rs2542147
rs544368432
rs56100000
rs118187422
rs571836101
rs373777090
rs2107367
rs572960308
rs1985546
rs189615340
rs8100672
rs10417845
rs8105552
rs576869604
rs1005505
rs527552577
rs7251792
rs34277975
rs200937464
rs35228155
rs60583377
rs11879272
rs117481827
rs6510991
19:1021504
rs73920544
rs74806805
rs549163776
rs78560766
rs145893237
rs138975468
rs189128623
rs10411240
rs142094324
rs140606971
rs10422209
rs4807440
rs559497987
rs573115850
rs147767045
rs549109689
19:1027421
rs12980170
rs12980370
rs34697645
rs561297473
rs139106846
rs550175103
rs576164136
rs547254266
rs529019605
rs528084875
rs201917431
rs559607002
rs7255427
rs10419072
rs369217986
rs561418585
rs7256075
rs530858703
rs7252428
rs3764642
rs184510773
rs149603637
rs539496276
rs114557702
rs4147904
rs10406449
rs566051356
rs3752228
rs552320457
rs571663276
rs144288935
rs117187003
rs550858539
rs74567454
rs575111399
rs192505421
rs538200140
rs565880304
rs531365316
rs4147936
rs4147934
rs28721316
rs11666702
rs556266958
rs200178682
rs76139012
rs28615613
rs549686945
rs113294002
rs150368435
rs537674408
rs79119189
rs905149
rs73505251
rs12981369
rs77131765
rs552899876
19:1067800
rs141322928
rs11670156
rs540497687
rs563115996
rs34397138
rs2269847
rs2269848
rs527386499
rs529729803
rs369890030
rs757232
rs150873583
rs111703950
rs11878877
rs76508986
rs188956887
rs72618591
19:1082182
rs11878920
rs11879092
rs11879091
rs5826721
rs546409118
rs556292914
rs2238586
rs6843
rs573877413
rs12253
rs560771513
rs190049811
rs142922622
rs114749057
rs10405108
rs573559415
rs187338292
rs76162940
rs181017759
rs200686261
rs8113195
rs532836591
rs138302172
rs545849567
rs145147422
rs527981895
rs8113305
rs6844
rs2238587
rs573963242
rs138821820
rs569146969
rs576990955
rs191551679
rs149575120
rs2074448
rs542226267
rs56259591
rs73507235
rs56077864
rs73507232
rs11084882
rs55917129
rs149504848
rs1046040
rs527419590
rs548183372
rs116779126
rs34912475
rs10416031
rs545796123
rs1046041
rs17551856
rs2074449
rs17526231
rs370550675
rs551862816
rs2074447
rs17554909
rs2074444
rs2074445
rs17523177
rs540672916
rs2074446
rs17554924
rs17554917
rs369728559
rs371018866
rs565816314
rs112308501
rs529082383
rs185293720
rs79627116
rs8103551
rs57563163
rs17526264
rs17554931
rs2074450
rs36207878
rs8103283
rs8178968
rs569964280
rs562612528
rs36207273
rs183015432
rs8178965
rs529684277
rs566592153
rs531452768
rs566928862
rs117193629
rs532171942
rs4807542
rs551922675
rs11407575
rs8178967
rs8178966
rs190085630
rs533890588
rs8178969
rs560004644
rs188207884
rs115170339
rs111584964
rs112914802
rs558963261
rs76868812
rs2302110
rs371581389
rs74884477
rs3826961
rs111442456
rs144601005
rs57479415
rs59237331
rs10412582
rs549994959
rs113599780
rs66590933
rs2286400
rs886990
rs2286401
rs2286399
rs10413074
rs112660142
rs564951456
rs368792124
rs534018924
rs879983
rs72975591
rs12971921
rs566716454
rs111537696
rs559870950
rs56744597
rs61612228
rs186598082
rs191943937
rs77710000
rs80309689
rs568659283
rs111898700
rs113675022
rs78468943
rs71868126
rs572048552
rs535710994
rs149832780
rs756734003
rs873073
rs188011428
rs79563012
rs201384443
rs111467467
rs873074
rs184562613
rs117830785
rs55961439
rs555302555
rs552701286
rs372096825
19:1173151
rs9304882
rs10451467
rs140622171
rs552702600
rs9304883
rs575392166
rs181743899
rs74720037
rs3795061
rs556466452
rs534251216
rs3764640
rs77762532
rs3764641
rs146412237
rs4807000
rs281440
rs281439
rs1124765
rs378395
rs12460655
rs313839
rs374886
rs78687328
rs140382788
rs3094287
rs12608448
rs386243
rs3848543
rs8102492
rs10426317
rs34271003
rs73581711
rs10421500
rs28746168
rs182227756
rs418821
rs281393
rs3859439
rs2287921
rs146711212
rs973579
rs838145
rs12982115
rs838144
rs2304205
rs2304206
rs2304204
rs1075453
rs6746013
rs76286777
rs780100
rs1647267
rs2303370
rs10182937
rs187972942
rs111545708
rs10200159
rs2099613
rs67574266
2:71017322:INDEL
rs115448075
rs7575830
rs6546636
rs7575735
rs71414837
rs12713717
rs7567290
rs189535281
rs72832724
rs34651755
rs1861076
rs2234491
rs2234495
rs62143225
rs2234493
rs2234496
rs2234494
rs13004912
2:71175552:INDEL
2:71175511:INDEL
rs2266919
rs12620379
rs11126312
rs11900482
rs13003982
rs11123810
rs11123908
rs75664449
rs113898864
rs1800919
rs41294844
rs12613301
rs190185055
rs13017584
rs114815603
rs114548997
rs2241132
rs2241131
2:102804538:INDEL
rs6710885
rs1420106
rs4851011
rs4849132
rs79716587
rs72934999
rs1879877
rs231775
rs4674277
rs4674276
rs10932766
rs1877714
rs13419763
rs2382817
rs13031757
rs13005100
rs2382818
rs2382819
rs3731860
rs10193189
rs9784019
rs9783992
rs11679983
rs74733828
rs7581442
rs13397985
rs10209615
rs11695193
rs72988290
rs58305522
rs2007304
rs11685434
rs4663834
rs2289477
rs10199278
rs36043566
rs139574699
rs34691302
rs1535883
rs7265879
rs6130997
rs10432735
rs148087725
rs12479993
rs188065124
rs78823072
rs6104456
rs11557123
rs2206892
rs1883832
rs752118
rs1800686
rs4647955
rs73113648
rs4647954
rs3787184
rs6062490
rs2297441
rs2738787
rs1291205
rs6062498
rs2236510
rs1056441
rs1741708
rs73191853
rs16997869
rs2850015
rs191348317
rs148956118
rs144986404
rs112371220
rs2284553
rs8126756
rs9974603
rs9975473
rs8134145
rs9975155
rs181952865
rs2276224
rs28360608
rs56045941
rs76081789
rs61696572
rs58548854
rs55708341
rs2838522
rs11089620
rs140491
rs140490
rs2298429
rs11704601
rs710177
rs13054355
rs412596
rs374659
rs861844
rs12628594
rs402548
rs388371
rs8137775
rs2235145
rs5755674
rs4461
rs2284033
rs3218251
rs12171227
rs147908781
rs13053551
rs62235060
rs5756540
rs62235067
rs1001810
rs71317032
rs4140871
rs16997918
rs56409124
rs9610683
rs2284037
rs9610682
rs8135343
rs2234053
rs9607799
rs2234052
rs2234058
rs2234059
rs202657
rs35319117
rs11721211
rs12715125
rs116135711
rs35744352
rs58433687
rs1515461
rs12493829
chr3:58318464
rs180977001
chr3:58318477
rs185407974
rs16843927
rs41271391
rs41271393
rs2871960
rs75366683
rs12718062
rs13137144
rs113075206
rs4690220
rs2703898
rs13435042
rs2637706
rs2637713
rs112691446
rs17470892
rs4475167
rs750743
rs11284742
rs2583391
rs2850328
rs13112986
rs2069763
rs11740255
rs77173787
5:35852887:INDEL
rs1353250
rs1494561
rs1353252
rs1353251
rs2292018
rs7731626
rs1230358
rs17087117
rs17087114
rs17087119
rs1230360
rs968218
rs147529760
rs17524572
rs2548537
rs2549785
rs2548536
rs34701361
rs2548538
rs773973820
rs2303210
rs2161657
rs2548535
rs117273653
rs3806940
rs2617434
rs17550815
rs3806939
rs3806942
rs3806944
rs3806943
rs3822687
rs17550822
rs183260325
rs56009267
rs3842058
rs17684739
rs2351010
rs4360063
rs1363974
rs7716222
rs62377827
rs78766180
rs1423357
rs117857733
rs79128738
rs74724171
rs38041
rs2400313
rs3776174
rs3756353
rs3756354
rs3756355
rs3797339
rs2522057
rs2240032
rs1881457
rs6580223
rs3761757
rs9324865
rs10051924
rs10051804
rs17111376
rs10058943
rs11748158
rs10058821
rs7724036
rs2233278
rs793007
rs72813185
rs4075958
rs4075959
rs4976688
rs4976689
rs35716097
rs12192148
rs2236276
rs2428494
rs2534683
rs147725457
rs2534670
rs2516498
rs3828912
rs145809981
rs184155393
rs115090101
rs2523505
rs2523506
rs2844482
rs1800630
6:32557740:INDEL
rs9270299
rs1049058
6:32634208:INDEL
rs1049057
rs9274514
rs3891175
rs3891174
rs3891176
rs2234067
rs3833928
rs2234069
rs201815488
rs62415893
rs2233434
rs2233433
rs1504215
rs6908626
rs34659678
rs9388486
rs9375435
rs3813675
rs9404042
rs45484795
rs56278154
rs117987087
rs41267757
rs1738074
rs212393
rs7748054
rs7772013
rs7748894
rs725786
rs2247314
rs2247315
rs2757039
rs2757041
rs2149083
rs2149084
rs2769346
rs2247325
rs150189585
rs1044059
rs239936
rs239933
rs239934
rs239935
rs4724806
rs3828944
rs3750037
rs7807755
rs849333
chr7:28219956
rs565938051
rs60600003
rs10232726
rs17552613
rs11506039
rs35064805
rs2618432
rs2251056
rs11786004
rs2305452
rs2305451
rs28507502
rs3808619
rs2583778
rs77360493
rs73541868
rs1930786
rs7028641
rs3761849
rs1930785
rs77144778

## Sheet: Sheet1
rsid	gene_name
rs112603604	B3GALT6
rs190796582	SDF4
rs6603785	RP5-902P8.12		1151 unique SNPs
rs139775692	PUSL1
rs61766198	ACAP3		400 unique genes
rs2649593	AURKAIP1
rs2275915	RN7SL657P
rs34442823	MRPL20
rs2477678	RP4-758J18.13
rs2227312	RP3-395M20.12
rs2227313	RP3-395M20.8
rs4870	TNFRSF14
rs1886730	MMEL1
rs745368	RP3-467L1.4
rs2859387	TNFRSF9
rs35733104	PARK7
chr1:8002510	Y_RNA
rs17523802	RERE
rs35675666	RP5-1115A15.1
rs3766606	RUNX3
rs161800	MANEAL
rs161802	RPRD2
rs301807	MRPL9
rs71514255	OAZ3
rs2306627	EFNA1
rs696616	FCRL3
rs74905404	CD244
rs111455542	ITLN2
rs73001391	FCER1G
rs7528684	HSPA6
rs12036607	RP3-471M13.2
rs12037395	RP5-1011O1.2
rs7410867	RGS1
rs4656971	IL10
rs4656972	IRF6
rs2070901	DIEXF
rs11811241	RBM17
rs16845082	PFKFB3
rs1323296	MIR3155A
rs2984920	GATA3-AS1
rs3024493	GATA3
rs12403599	RP11-379F12.3
rs12403006	MAP3K8
rs34743335	CREM
rs12404886	RP11-297A16.2
rs73605992	WDFY4
rs71499653	RTKN2
rs61839728	ZSWIM8
rs2275806	ZSWIM8-AS1
rs306587	NDST2
rs306589	RP11-574K11.31
rs306588	RP11-574K11.5
rs4934730	CAMK2G
rs16935880	PLAU
rs12765038	C10orf55
rs1057108	VCL
rs12246033	ZMIZ1
rs12264889	PPIF
rs1864836	FAM213A
rs11000780	TSPAN14
rs2271271	NKX2-3
rs529423655	ACTR1A
rs551098394	SUFU
10:75560383	RP11-525A16.4
rs569098534	DUSP5
rs368625457	CASP7
rs148636613	FAM53B
rs530542206	RP11-12J10.3
rs537530036	METTL10
rs35611463	LSP1
rs12775558	RP4-607I7.1
rs570306577	CD44
rs570545687	PRR5L
rs564554844	TMEM109
rs549655525	RP11-881M11.1
rs113189683	TMEM132A
rs16930949	RP11-881M11.4
rs532398214	CD6
rs572442527	RNU6-933P
rs527295252	CD5
rs568058204	TMEM258
rs530254939	MIR611
rs531665648	FEN1
rs559201147	FADS2
rs562773274	FADS1
rs58048583	MIR1908
rs2227552	FADS3
rs2459449	GPR137
rs201407499	BAD
rs2227551	TRMT112
10:75668787	PRDX5
rs548248917	CCDC88B
rs145348571	SLC22A11
rs1916341	OVOL1
rs371199984	CFL1
rs72816319	SNX32
rs2227580	MUS81
rs1916340	DDX6
rs2227579	CXCR5
rs556245855	BCL9L
rs549463604	ETS1
rs568057544	RP11-1007G5.2
rs78289523	PLEKHG6
rs539278940	TNFRSF1A
rs527937347	SCNN1A
rs531449884	LTBR
rs557545378	CD27
rs559872565	TAPBPL
rs2688619	CD27-AS1
rs193109622	VAMP1
rs575029676	RP11-75L1.1
rs538013467	CLECL1
rs3812624	HDAC7
rs144310550	SUOX
rs551523796	IKZF4
rs371489159	RPS26
rs3812625	RP11-603J24.4
rs547337176	ERBB3
rs559106123	RP11-977G19.11
rs76109311	CS
rs2233713	PAN2
rs2233715	OS9
rs143361357	TSFM
rs74143132	IFNG-AS1
rs77244906	SPPL3
rs116857892	PITPNM2
rs4934189	MPHOSPH9
rs17618331	SLC15A4
rs116848392	FOXO1
rs10883371	AKAP11
rs10883373	RP11-168P13.1
rs2296590	ENOX1
rs3818470	LACC1
rs143273538	CCDC122
rs138018204	LINC00284
rs41291906	DLEU1
rs11594185	GPR18
rs1889568	UBAC2
rs28411397	MIR623
rs11245348	FAM177A1
rs2683599	KIAA0391
rs2277264	PPP2R3C
rs907611	AL121594.1
rs907612	PSMA6
rs907613	PRKCH
rs12365962	ZFP36L1
rs2592555	FOS
rs12291147	GALC
rs2285734	RP11-300J18.3
rs12294981	TRAF3
rs150433412	EDC3
rs12285866	CYP1A1
rs1010236627	CSK
rs113460854	MIR4513
rs75307228	LMAN1L
rs78601160	CPLX3
rs2237996	ULK3
rs3019540	SCAMP2
rs56103919	IQGAP1
rs2237997	SOCS1
rs28546162	RMI2
rs12418337	RP11-485G7.5
rs545230	PRKCB
rs546241	CLN3
rs174538	APOBR
rs174561	IL27
rs3834458	CCDC101
rs968567	FBXL19
rs5792235	SETD1A
rs693672	STX1B
rs174466	STX4
rs2510066	ZFP90
rs887314	CTRB1
rs9787810	MYBBP1A
rs479777	RABEP1
rs663743	ZPBP2
rs11601860	ORMDL3
rs2078267	RP11-387H17.4
rs11227302	SMARCE1
rs72924752	RP11-358B23.5
rs59416249	AC003104.1
rs667555	STAT5B
rs7947929	STAT3
rs7947741	RP11-1079K10.3
rs117231452	ZNF652
rs1939212	C17orf67
rs149943776	DGKE
rs57494551	RNU6-1158P
rs199725450	RP11-16C1.3
rs630923	MIR3678
rs149114341	GRB2
rs73575428	KIAA0195
rs76598569	SYNGR2
rs74584888	TK1
rs151213883	AFMID
rs12223943	RP11-973H7.1
rs146647148	TMEM259
rs113559360	RNU6-2
rs142348685	CNN2
rs71584815	AC011558.5
rs147997492	ABCA7
rs34819705	HMHA1
rs767455	POLR2E
rs4149622	GPX4
rs2234649	SBNO2
rs56128666	STK11
rs111317117	TICAM1
rs55859427	CTD-2369P2.8
rs55797039	ICAM5
rs3759324	CTD-2369P2.10
rs72645157	FDX1L
rs879605	SLC44A2
rs28999107	PRKD2
rs10849448	FAM83E
rs3759335	RPL18
rs3759336	SPHK2
rs2250246	AC022154.7
rs2286596	DBP
rs11569359	CA11
rs3136551	RN7SL345P
rs25680	FUT2
rs2534719	MAMSTR
rs11064195	RASIP1
rs11569388	IZUMO1
rs753359926	IRF3
rs2532502	BCL2L12
rs7132503	ADM5
rs2041385	CTB-33G10.6
rs2041384	CPT1C
rs7390	ADCY3
rs2534711	DNAJC27-AS1
rs2244083	DNAJC27
rs2243977	NRBP1
rs71584828	THADA
rs1045548	SMEK2
rs2534710	RP11-554J4.1
rs142707363	PAPOLG
rs75100764	REL
rs2072378	AC010733.4
rs11064213	FIGLA
rs76498272	AC007040.5
rs2072377	VAX2
rs12422771	AC007040.7
rs73042333	AFF3
rs2534721	IL1R1
rs10844503	IL1RL2
rs12304510	IL18R1
rs10492165	IL18RAP
rs148066105	SLC9A4
rs78322254	IL37
rs113736796	ARHGAP15
rs2544034	ALS2CR12
rs772920	CD28
rs10876864	CTLA4
rs705704	GPBAR1
rs705705	PNKD
rs1131017	AAMP
rs7297175	TMBIM1
rs41423244	SP110
rs2695789	AC009950.2
rs80317430	SP140
rs79824801	SP140L
rs2371494	ATG16L1
rs11358218	THAP4
rs4760168	ATG4B
rs11172335	SIRPG
rs10747783	RP11-77C3.3
rs187447202	FERMT1
rs78836744	SLC12A5
rs149558972	RP11-465L10.10
rs551215733	NCOA5
rs79735780	CD40
rs59781510	SNAI1
rs150482158	NFATC2
rs55637283	RTEL1-TNFRSF6B
rs55853686	RTEL1
12:68383552	TNFRSF6B
rs532703	ARFRP1
rs2393716	ZGPAT
rs641760	RP4-583P15.15
rs1260294	LIME1
rs1626899	RP4-583P15.14
rs12298615	SLC2A4RG
rs34616325	AP000295.10
rs35594717	IFNAR1
rs183583501	IFNGR2
rs143265763	TMEM50B
rs77085139	DNAJC28
rs9533054	RUNX1
rs115385546	SIK1
rs3816312	AP001058.3
rs9562518	UBE2L3
rs9567295	YDJC
rs3818818	SDF2L1
rs76474346	PPIL2
rs73467552	MIR301B
rs77813120	MIR130B
rs78919027	HMGXB4
rs7999434	TOM1
rs12867732	RP3-510H16.3
rs2580188	AL022314.1
rs117908129	IL2RB
rs3759443	RP1-151B14.6
rs16956449	C1QTNF6
rs7993715	RAC2
rs72649597	TEF
rs7998034	TOB2
rs143052672	PLCL2-AS1
rs148666432	AC144521.1
rs3809449	EOMES
rs28365850	GLB1
rs941653	TMPPE
rs1048990	ABHD6
rs3825655	PXK
rs3783799	SENP7
rs2296275	CD80
chr14:61943759	ZBTB38
rs1051533	LINC01063
rs2236262	DGKQ
rs4645854	IDUA
rs73312836	RP11-213G21.1
rs74074328	RP11-617D20.1
rs71421262	KLF3
rs201273005	AC021860.1
rs1051750	TEC
rs71421264	SHROOM3
rs79589176	RP11-359D14.2
rs578168050	AP001816.1
rs558216476	PPP3CA
rs77363088	RP11-498M5.2
rs550722626	IL2
rs3826042	CTD-2154B17.4
rs374583096	DAP
rs17861099	CTD-2113L7.1
rs36090160	IL7R
rs4646417	OSMR
rs3826041	CTD-2127H9.1
rs35686934	RNA5SP184
rs552361034	ERAP2
rs564160819	LNPEP
rs117001954	CTD-2260A17.2
rs141856776	ST8SIA4
rs139529999	TNFAIP8
rs183551129	AC004041.2
rs201211427	IL13
rs575452209	NDFIP1
rs34755093	IRGM
rs528173704	ZNF300
rs186442904	TNIP1
rs1378941	RP11-536N17.1
rs8028495	MXD3
15:75080241	RGS14
rs34896354	SLC34A1
rs371065814	SERPINB9
rs555827757	HLA-B
rs111962183	MICB
rs542007111	MCCD1
rs546941347	DDX39B
rs186389081	SNORD84
rs78386305	DDX39B-AS1
rs372830649	LTA
rs186716518	TNF
rs2301249	HLA-DRB1
rs35625871	HLA-DQB1
rs35015218	RP1-50J22.4
rs34029216	ETV7
rs76196923	CCND3
rs367647321	TAF8
rs117209666	NFKBIE
rs111973536	BACH2
rs550228921	TRAF3IP2
rs74025850	CENPW
rs532318141	PPIL4
rs2290574	RP1-111C20.4
rs545504701	RSPH3
rs10220784	TAGAP
rs551757357	RP1-111C20.3
rs186390658	RP11-13P5.1
rs554261102	RP11-514O12.4
rs139591283	RNASET2
rs11857695	MIR3939
rs564521289	FGFR1OP
rs146102692	RP11-517H2.6
rs11853271	RP1-167A14.2
rs243332	DAGLB
rs33977706	JAZF1-AS1
rs193778	JAZF1
rs72773819	ELMO1
rs7191700	AC020743.3
rs12149160	IKZF1
rs918737	PARP12
rs11645239	FAM167A
rs151234	BLK
rs153109	ELP3
rs67340371	ZC2HC1A
rs7191618	IL7
rs3859172	RP11-305L7.3
rs1458202	PHF19
rs4889599	TRAF1
rs72800847	ENDOG
rs58726213
rs12445650
rs4783653
rs1728773
rs1645936
rs1645935
rs1728770
rs1728769
rs1645975
rs1645934
rs1170445
rs1170444
rs1170443
rs1182968
rs1170442
rs8056814
rs3809849
rs12603519
rs72634016
chr17:5185402
rs11557466
rs12603332
rs3752026
rs34129849
rs7219855
rs4029774
rs3736164
rs112502960
rs6503770
rs2235092
rs74390925
rs4794673
rs111769401
rs9911119
rs76409794
rs12943902
rs56007395
rs79869968
rs78541128
rs9908045
rs9908349
rs3829575
rs1071664
rs2847260
rs2542147
rs544368432
rs56100000
rs118187422
rs571836101
rs373777090
rs2107367
rs572960308
rs1985546
rs189615340
rs8100672
rs10417845
rs8105552
rs576869604
rs1005505
rs527552577
rs7251792
rs34277975
rs200937464
rs35228155
rs60583377
rs11879272
rs117481827
rs6510991
19:1021504
rs73920544
rs74806805
rs549163776
rs78560766
rs145893237
rs138975468
rs189128623
rs10411240
rs142094324
rs140606971
rs10422209
rs4807440
rs559497987
rs573115850
rs147767045
rs549109689
19:1027421
rs12980170
rs12980370
rs34697645
rs561297473
rs139106846
rs550175103
rs576164136
rs547254266
rs529019605
rs528084875
rs201917431
rs559607002
rs7255427
rs10419072
rs369217986
rs561418585
rs7256075
rs530858703
rs7252428
rs3764642
rs184510773
rs149603637
rs539496276
rs114557702
rs4147904
rs10406449
rs566051356
rs3752228
rs552320457
rs571663276
rs144288935
rs117187003
rs550858539
rs74567454
rs575111399
rs192505421
rs538200140
rs565880304
rs531365316
rs4147936
rs4147934
rs28721316
rs11666702
rs556266958
rs200178682
rs76139012
rs28615613
rs549686945
rs113294002
rs150368435
rs537674408
rs79119189
rs905149
rs73505251
rs12981369
rs77131765
rs552899876
19:1067800
rs141322928
rs11670156
rs540497687
rs563115996
rs34397138
rs2269847
rs2269848
rs527386499
rs529729803
rs369890030
rs757232
rs150873583
rs111703950
rs11878877
rs76508986
rs188956887
rs72618591
19:1082182
rs11878920
rs11879092
rs11879091
rs5826721
rs546409118
rs556292914
rs2238586
rs6843
rs573877413
rs12253
rs560771513
rs190049811
rs142922622
rs114749057
rs10405108
rs573559415
rs187338292
rs76162940
rs181017759
rs200686261
rs8113195
rs532836591
rs138302172
rs545849567
rs145147422
rs527981895
rs8113305
rs6844
rs2238587
rs573963242
rs138821820
rs569146969
rs576990955
rs191551679
rs149575120
rs2074448
rs542226267
rs56259591
rs73507235
rs56077864
rs73507232
rs11084882
rs55917129
rs149504848
rs1046040
rs527419590
rs548183372
rs116779126
rs34912475
rs10416031
rs545796123
rs1046041
rs17551856
rs2074449
rs17526231
rs370550675
rs551862816
rs2074447
rs17554909
rs2074444
rs2074445
rs17523177
rs540672916
rs2074446
rs17554924
rs17554917
rs369728559
rs371018866
rs565816314
rs112308501
rs529082383
rs185293720
rs79627116
rs8103551
rs57563163
rs17526264
rs17554931
rs2074450
rs36207878
rs8103283
rs8178968
rs569964280
rs562612528
rs36207273
rs183015432
rs8178965
rs529684277
rs566592153
rs531452768
rs566928862
rs117193629
rs532171942
rs4807542
rs551922675
rs11407575
rs8178967
rs8178966
rs190085630
rs533890588
rs8178969
rs560004644
rs188207884
rs115170339
rs111584964
rs112914802
rs558963261
rs76868812
rs2302110
rs371581389
rs74884477
rs3826961
rs111442456
rs144601005
rs57479415
rs59237331
rs10412582
rs549994959
rs113599780
rs66590933
rs2286400
rs886990
rs2286401
rs2286399
rs10413074
rs112660142
rs564951456
rs368792124
rs534018924
rs879983
rs72975591
rs12971921
rs566716454
rs111537696
rs559870950
rs56744597
rs61612228
rs186598082
rs191943937
rs77710000
rs80309689
rs568659283
rs111898700
rs113675022
rs78468943
rs71868126
rs572048552
rs535710994
rs149832780
rs756734003
rs873073
rs188011428
rs79563012
rs201384443
rs111467467
rs873074
rs184562613
rs117830785
rs55961439
rs555302555
rs552701286
rs372096825
19:1173151
rs9304882
rs10451467
rs140622171
rs552702600
rs9304883
rs575392166
rs181743899
rs74720037
rs3795061
rs556466452
rs534251216
rs3764640
rs77762532
rs3764641
rs146412237
rs4807000
rs281440
rs281439
rs1124765
rs378395
rs12460655
rs313839
rs374886
rs78687328
rs140382788
rs3094287
rs12608448
rs386243
rs3848543
rs8102492
rs10426317
rs34271003
rs73581711
rs10421500
rs28746168
rs182227756
rs418821
rs281393
rs3859439
rs2287921
rs146711212
rs973579
rs838145
rs12982115
rs838144
rs2304205
rs2304206
rs2304204
rs1075453
rs6746013
rs76286777
rs780100
rs1647267
rs2303370
rs10182937
rs187972942
rs111545708
rs10200159
rs2099613
rs67574266
2:71017322:INDEL
rs115448075
rs7575830
rs6546636
rs7575735
rs71414837
rs12713717
rs7567290
rs189535281
rs72832724
rs34651755
rs1861076
rs2234491
rs2234495
rs62143225
rs2234493
rs2234496
rs2234494
rs13004912
2:71175552:INDEL
2:71175511:INDEL
rs2266919
rs12620379
rs11126312
rs11900482
rs13003982
rs11123810
rs11123908
rs75664449
rs113898864
rs1800919
rs41294844
rs12613301
rs190185055
rs13017584
rs114815603
rs114548997
rs2241132
rs2241131
2:102804538:INDEL
rs6710885
rs1420106
rs4851011
rs4849132
rs79716587
rs72934999
rs1879877
rs231775
rs4674277
rs4674276
rs10932766
rs1877714
rs13419763
rs2382817
rs13031757
rs13005100
rs2382818
rs2382819
rs3731860
rs10193189
rs9784019
rs9783992
rs11679983
rs74733828
rs7581442
rs13397985
rs10209615
rs11695193
rs72988290
rs58305522
rs2007304
rs11685434
rs4663834
rs2289477
rs10199278
rs36043566
rs139574699
rs34691302
rs1535883
rs7265879
rs6130997
rs10432735
rs148087725
rs12479993
rs188065124
rs78823072
rs6104456
rs11557123
rs2206892
rs1883832
rs752118
rs1800686
rs4647955
rs73113648
rs4647954
rs3787184
rs6062490
rs2297441
rs2738787
rs1291205
rs6062498
rs2236510
rs1056441
rs1741708
rs73191853
rs16997869
rs2850015
rs191348317
rs148956118
rs144986404
rs112371220
rs2284553
rs8126756
rs9974603
rs9975473
rs8134145
rs9975155
rs181952865
rs2276224
rs28360608
rs56045941
rs76081789
rs61696572
rs58548854
rs55708341
rs2838522
rs11089620
rs140491
rs140490
rs2298429
rs11704601
rs710177
rs13054355
rs412596
rs374659
rs861844
rs12628594
rs402548
rs388371
rs8137775
rs2235145
rs5755674
rs4461
rs2284033
rs3218251
rs12171227
rs147908781
rs13053551
rs62235060
rs5756540
rs62235067
rs1001810
rs71317032
rs4140871
rs16997918
rs56409124
rs9610683
rs2284037
rs9610682
rs8135343
rs2234053
rs9607799
rs2234052
rs2234058
rs2234059
rs202657
rs35319117
rs11721211
rs12715125
rs116135711
rs35744352
rs58433687
rs1515461
rs12493829
chr3:58318464
rs180977001
chr3:58318477
rs185407974
rs16843927
rs41271391
rs41271393
rs2871960
rs75366683
rs12718062
rs13137144
rs113075206
rs4690220
rs2703898
rs13435042
rs2637706
rs2637713
rs112691446
rs17470892
rs4475167
rs750743
rs11284742
rs2583391
rs2850328
rs13112986
rs2069763
rs11740255
rs77173787
5:35852887:INDEL
rs1353250
rs1494561
rs1353252
rs1353251
rs2292018
rs7731626
rs1230358
rs17087117
rs17087114
rs17087119
rs1230360
rs968218
rs147529760
rs17524572
rs2548537
rs2549785
rs2548536
rs34701361
rs2548538
rs773973820
rs2303210
rs2161657
rs2548535
rs117273653
rs3806940
rs2617434
rs17550815
rs3806939
rs3806942
rs3806944
rs3806943
rs3822687
rs17550822
rs183260325
rs56009267
rs3842058
rs17684739
rs2351010
rs4360063
rs1363974
rs7716222
rs62377827
rs78766180
rs1423357
rs117857733
rs79128738
rs74724171
rs38041
rs2400313
rs3776174
rs3756353
rs3756354
rs3756355
rs3797339
rs2522057
rs2240032
rs1881457
rs6580223
rs3761757
rs9324865
rs10051924
rs10051804
rs17111376
rs10058943
rs11748158
rs10058821
rs7724036
rs2233278
rs793007
rs72813185
rs4075958
rs4075959
rs4976688
rs4976689
rs35716097
rs12192148
rs2236276
rs2428494
rs2534683
rs147725457
rs2534670
rs2516498
rs3828912
rs145809981
rs184155393
rs115090101
rs2523505
rs2523506
rs2844482
rs1800630
6:32557740:INDEL
rs9270299
rs1049058
6:32634208:INDEL
rs1049057
rs9274514
rs3891175
rs3891174
rs3891176
rs2234067
rs3833928
rs2234069
rs201815488
rs62415893
rs2233434
rs2233433
rs1504215
rs6908626
rs34659678
rs9388486
rs9375435
rs3813675
rs9404042
rs45484795
rs56278154
rs117987087
rs41267757
rs1738074
rs212393
rs7748054
rs7772013
rs7748894
rs725786
rs2247314
rs2247315
rs2757039
rs2757041
rs2149083
rs2149084
rs2769346
rs2247325
rs150189585
rs1044059
rs239936
rs239933
rs239934
rs239935
rs4724806
rs3828944
rs3750037
rs7807755
rs849333
chr7:28219956
rs565938051
rs60600003
rs10232726
rs17552613
rs11506039
rs35064805
rs2618432
rs2251056
rs11786004
rs2305452
rs2305451
rs28507502
rs3808619
rs2583778
rs77360493
rs73541868
rs1930786
rs7028641
rs3761849
rs1930785
rs77144778
