# Supplementary material for: Dynamic chromatin architecture identifies new autoimmune-associated enhancers for IL2 and novel genes regulating CD4+ T cell activation
Source: eLife. 2024 Sep 20;13:RP96852. doi: 10.7554/eLife.96852 (PMC11418197; doi:10.7554/eLife.96852)
Supplement: Supplementary file 16. [file elife-96852-supp16.xlsx]

## Sheet: Variant2GeneMapping_byStudy_inc
Table 16 - Comparison of effector gene nomination approaches
	Tcell HiC v2g (Current Study)	Tcell ATAC promoter	Tcell HiC v2g Dynamic (Current Study)	Tcell activation pcHIC Burren	sentinel nearest Gene	Sosik singlecell Tcell eQTL	Yang 2020 Tcell activation pcHiC	Javierre pcHiC all cells	Javierre pcHiC CD4	DICE eQTL	ABC_aveHiC_unstim_refseq	ABC_aveHiC_stim_refseq	Gate ATAC Coaccessibility	Gate eQTLs	Gate HiC	Ye eQTLs	HIEI_truth_set
AAMP	1	1	1	1	0	0	0	1	1	0	1	1	0	0	0	0	0
AARS2	1	0	1	0	0	0	1	1	0	0	0	0	0	0	0	0	0
ABCA7	1	1	1	1	0	1	1	1	1	0	1	1	1	0	0	0	0
ABCB6	0	0	0	1	0	0	0	1	1	0	0	0	0	0	0	0	0
ABCB9	1	0	0	1	0	0	0	1	1	1	0	0	0	0	0	0	0
ABCD1	0	0	0	0	0	0	0	1	0	0	0	0	0	0	0	0	0
ABCD2	0	0	0	0	0	0	0	1	0	0	0	0	0	0	0	0	0
ABCF1	0	0	0	1	0	0	0	1	1	0	0	0	0	0	0	0	0
ABCF3	0	0	0	0	0	0	1	0	0	0	0	0	0	0	0	0	0
ABCG5	0	0	0	0	0	0	0	1	0	0	0	0	0	0	0	0	0
ABCG8	0	0	0	0	0	0	0	1	0	0	0	0	0	0	0	0	0
ABHD16A	0	0	0	1	0	0	0	1	1	0	0	0	0	0	0	0	0
ABHD16B	1	0	0	1	0	0	0	1	1	0	0	0	0	0	0	0	0
ABHD6	1	1	1	0	0	1	0	0	0	1	0	0	0	1	0	0	0
ABI2	0	0	0	0	0	0	0	0	0	0	1	0	0	0	0	0	0
ABI3	0	0	0	0	0	0	0	1	0	0	0	0	0	0	0	0	0
ABLIM1	0	0	0	0	0	0	1	0	0	0	0	0	0	0	0	0	0
AC002117.1	0	0	0	0	0	0	0	1	0	0	0	0	0	0	0	0	0
AC002310.13	0	0	0	0	0	0	1	0	0	0	0	0	0	0	0	0	0
AC002310.7	0	0	0	0	0	0	1	1	1	0	0	0	0	0	0	0	0
AC002454.1	1	0	0	0	0	0	1	1	1	0	0	0	0	0	0	0	0
AC002467.7	0	0	0	0	0	0	0	1	1	0	0	0	0	0	0	0	0
AC002472.11	0	0	0	0	0	0	1	0	0	0	0	0	0	0	0	0	0
AC002472.13	0	0	0	1	0	0	1	1	1	0	0	0	0	0	0	0	0
AC003075.4	0	0	0	0	0	0	1	0	0	0	0	0	0	0	0	0	0
AC003104.1	1	1	1	0	0	0	0	1	1	0	0	0	0	0	0	0	0
AC004041.2	1	1	0	0	1	0	0	1	1	0	0	0	0	0	0	0	0
AC004069.1	0	0	0	0	0	0	0	1	0	0	0	0	0	0	0	0	0
AC004125.3	0	0	0	0	0	0	0	0	0	1	0	0	0	0	0	0	0
AC004129.7	0	0	0	0	0	0	1	0	0	0	0	0	0	0	0	0	0
AC004221.2	1	0	0	0	0	0	1	1	1	0	0	0	0	0	0	0	0
AC004237.1	0	0	0	0	1	0	0	1	0	0	0	0	0	0	0	0	0
AC004449.6	0	0	0	0	0	0	1	0	0	0	0	0	0	0	0	0	0
AC004466.1	1	0	0	0	0	0	0	0	0	0	0	0	0	0	0	0	0
AC004510.3	0	0	0	0	0	0	0	0	0	0	0	0	0	0	1	0	0
AC004528.1	1	0	0	0	0	0	0	1	0	0	0	0	0	0	0	0	0
AC004528.4	1	0	0	0	0	0	0	1	0	0	0	0	0	0	0	0	0
AC004540.4	0	0	0	0	0	0	1	0	0	0	0	0	0	0	0	0	0
AC004549.6	0	0	0	0	0	0	1	1	1	0	0	0	0	0	0	0	0
AC004771.1	0	0	0	0	0	0	0	1	0	0	0	0	0	0	0	0	0
AC004840.9	1	0	1	0	0	0	0	0	0	0	0	0	0	0	0	0	0
AC005034.3	0	0	0	0	0	0	1	0	0	0	0	0	0	0	0	0	0
AC005037.3	0	0	0	0	0	0	0	1	1	0	0	0	0	0	0	0	0
AC005062.2	0	0	0	0	0	0	0	1	0	0	0	0	0	0	0	0	0
AC005083.1	0	0	0	0	0	0	0	1	0	0	0	0	0	0	0	0	0
AC005104.3	1	0	0	0	0	0	0	1	1	1	0	0	0	0	0	0	0
AC005154.6	0	0	0	0	0	0	1	0	0	0	0	0	0	0	0	0	0
AC005215.1	0	0	0	0	0	0	0	1	1	0	0	0	0	0	0	0	0
AC005220.3	0	0	0	0	0	0	0	1	1	0	0	0	0	0	0	0	0
AC005229.1	0	0	0	0	1	0	0	0	0	0	0	0	0	0	0	0	0
AC005306.3	0	0	0	0	0	0	1	0	0	0	0	0	0	0	0	0	0
AC005329.7	0	0	0	0	0	0	1	0	0	0	0	0	0	0	0	0	0
AC005363.9	0	0	0	0	0	0	1	0	0	0	0	0	0	0	0	0	0
AC005370.1	0	0	0	0	0	0	0	1	1	0	0	0	0	0	0	0	0
AC005391.2	1	0	0	0	0	0	0	0	0	0	0	0	0	0	0	0	0
AC005549.3	0	0	0	0	0	0	0	1	0	0	0	0	0	0	0	0	0
AC005592.2	0	0	0	0	0	0	0	1	1	0	0	0	0	0	0	0	0
AC005592.3	1	0	0	0	0	0	0	0	0	0	0	0	0	0	0	0	0
AC005618.1	0	0	0	0	0	0	0	1	1	0	0	0	0	0	0	0	0
AC005740.5	1	0	0	0	0	0	0	1	1	0	0	0	0	0	0	0	0
AC005932.1	0	0	0	0	0	0	0	1	0	0	0	0	0	0	0	0	0
AC005943.5	0	0	0	0	0	0	0	0	0	1	0	0	0	0	0	0	0
AC006042.7	0	0	0	0	0	0	0	1	0	0	0	0	0	0	0	0	0
AC006547.8	0	0	0	0	0	0	1	0	0	0	0	0	0	0	0	0	0
AC007014.1	0	0	0	0	0	0	1	0	0	0	0	0	0	0	0	0	0
AC007040.11	0	0	0	0	0	0	0	1	0	1	0	0	0	0	0	0	0
AC007040.5	1	1	0	0	1	0	0	0	0	0	0	0	0	0	0	0	0
AC007040.6	0	0	0	0	0	0	0	1	0	0	0	0	0	0	0	0	0
AC007040.7	1	1	0	0	0	0	0	1	1	0	0	0	0	0	0	0	0
AC007041.1	0	0	0	0	0	0	0	1	1	0	0	0	0	0	0	0	0
AC007163.6	0	0	0	0	0	0	0	1	0	0	0	0	0	0	0	0	0
AC007192.6	1	0	0	0	0	0	0	0	0	0	0	0	0	0	0	0	0
AC007216.1	0	0	0	0	0	0	1	1	1	0	0	0	0	0	0	0	0
AC007216.2	0	0	0	1	0	0	0	1	1	0	0	0	0	0	0	0	0
AC007229.3	0	0	0	0	0	0	0	1	0	0	0	0	0	0	0	0	0
AC007248.6	0	0	0	0	0	0	0	0	0	0	0	0	0	0	1	0	0
AC007248.7	0	0	0	0	1	0	0	0	0	1	0	0	0	0	0	0	0
AC007251.2	0	0	0	0	0	0	0	0	0	1	0	0	0	0	0	0	0
AC007271.3	1	0	0	0	0	0	0	1	1	0	0	0	0	0	0	0	0
AC007278.2	1	0	1	0	1	0	0	0	0	1	0	0	0	0	0	0	0
AC007278.3	1	0	0	0	1	0	1	0	0	1	0	0	0	0	0	0	0
AC007365.1	0	0	0	0	1	0	1	0	0	0	0	0	0	0	0	0	0
AC007365.2	1	0	0	0	0	0	0	1	0	0	0	0	0	0	0	0	0
AC007365.3	1	0	0	0	0	0	1	0	0	0	0	0	0	0	0	0	0
AC007383.3	0	0	0	0	0	0	0	1	0	0	0	0	0	0	0	0	0
AC007395.3	1	0	0	0	0	0	0	1	1	0	0	0	0	0	0	0	0
AC007395.4	0	0	0	0	0	0	0	0	0	1	0	0	0	0	0	0	0
AC007551.3	0	0	0	0	0	0	0	1	1	0	0	0	0	0	0	0	0
AC007679.3	0	0	0	0	0	0	1	1	0	0	0	0	0	0	0	0	0
AC007773.1	0	0	0	0	0	0	0	0	0	1	0	0	0	0	0	0	0
AC007879.5	0	0	0	0	0	0	1	0	0	0	0	0	0	0	0	0	0
AC007880.1	1	0	0	0	0	0	0	0	0	0	0	0	0	0	0	0	0
AC008073.9	0	0	0	0	0	0	0	1	0	0	0	0	0	0	0	0	0
AC008397.1	0	0	0	0	1	0	0	1	1	0	0	0	0	0	0	0	0
AC008694.2	0	0	0	0	0	0	1	0	0	0	0	0	0	0	0	0	0
AC008697.1	0	0	0	0	1	0	0	0	0	0	0	0	0	0	0	0	0
AC008703.1	0	0	0	0	1	0	0	0	0	0	0	0	0	0	0	0	0
AC008706.1	0	0	0	0	0	0	0	1	1	0	0	0	0	0	0	0	0
AC008738.1	0	0	0	0	0	0	0	1	0	0	0	0	0	0	0	0	0
AC008746.10	0	0	0	0	0	0	1	0	0	0	0	0	0	0	0	0	0
AC008781.7	0	0	0	0	0	0	0	1	1	0	0	0	0	0	0	0	0
AC008850.3	0	0	0	0	0	0	1	0	0	0	0	0	0	0	0	0	0
AC008865.1	0	0	0	0	1	0	0	0	0	0	0	0	0	0	0	0	0
AC009121.1	1	0	0	0	0	0	1	1	1	0	0	0	0	0	0	0	0
AC009228.1	0	0	0	0	0	0	0	1	0	0	0	0	0	0	0	0	0
AC009303.1	0	0	0	0	0	0	1	0	0	0	0	0	0	0	0	0	0
AC009950.2	0	1	0	0	0	1	0	0	0	0	0	0	0	0	0	0	0
AC009960.3	0	0	0	0	0	0	1	0	0	0	0	0	0	0	0	0	0
AC010149.4	1	0	0	0	0	0	0	0	0	0	0	0	0	0	0	0	0
AC010226.4	0	0	0	0	0	0	1	0	0	0	0	0	0	0	0	0	0
AC010336.1	0	0	0	0	0	0	1	0	0	0	0	0	0	0	0	0	0
AC010368.1	0	0	0	0	0	0	0	1	1	0	0	0	0	0	0	0	0
AC010368.2	1	0	0	1	0	0	0	1	1	0	0	0	0	0	0	0	0
AC010441.1	1	0	0	0	0	0	0	0	0	0	0	0	0	0	0	0	0
AC010468.2	0	0	0	0	0	0	1	1	1	0	0	0	0	0	0	0	0
AC010468.3	0	0	0	0	1	0	0	0	0	0	0	0	0	0	0	0	0
AC010524.2	1	0	0	0	0	0	0	1	1	0	0	0	0	0	0	0	0
AC010609.1	0	0	0	0	0	0	1	0	0	0	0	0	0	0	0	0	0
AC010733.4	1	1	0	0	1	0	1	1	1	0	0	0	0	0	0	0	0
AC010733.5	0	0	0	0	1	0	0	0	0	1	0	0	0	0	0	0	0
AC010733.7	0	0	0	0	1	0	0	0	0	0	0	0	0	0	0	0	0
AC010883.5	1	0	0	0	0	0	0	1	1	1	0	0	0	0	0	0	0
AC010976.2	0	0	0	0	0	0	1	0	0	0	0	0	0	0	0	0	0
AC011453.1	0	0	0	0	0	0	0	1	1	0	0	0	0	0	0	0	0
AC011475.1	1	0	1	1	0	0	0	1	1	0	0	0	0	0	0	0	0
AC011551.3	0	0	0	1	0	0	0	1	1	0	0	0	0	0	0	0	0
AC011558.5	1	1	0	0	0	0	1	1	1	0	0	0	1	0	0	0	0
AC011747.7	1	0	0	0	0	0	0	1	0	0	0	0	0	0	0	0	0
AC011933.1	0	0	0	0	0	0	1	0	0	0	0	0	0	0	0	0	0
AC011933.2	0	0	0	0	0	0	1	0	0	1	0	0	0	0	0	0	0
AC011997.1	0	0	0	0	0	0	0	0	0	1	0	0	0	0	0	0	0
AC012065.7	0	0	0	0	0	0	1	0	0	0	0	0	0	0	0	0	0
AC012146.7	0	0	0	0	0	0	0	1	0	0	0	0	0	0	0	0	0
AC012358.8	0	0	0	0	0	0	0	1	0	0	0	0	0	0	0	0	0
AC012457.2	0	0	0	0	0	0	0	1	1	0	0	0	0	0	0	0	0
AC012467.1	0	0	0	0	0	0	0	1	1	0	0	0	0	0	0	0	0
AC013264.2	0	0	0	0	0	0	0	0	0	1	0	0	0	0	0	0	0
AC013460.1	1	0	0	0	0	0	0	0	0	0	0	0	0	0	0	0	0
AC013733.3	0	0	0	0	0	0	0	1	0	0	0	0	0	0	0	0	0
AC015969.3	0	0	0	0	1	0	0	1	1	0	0	0	0	0	0	0	0
AC016697.2	0	0	0	0	0	0	1	0	0	0	0	0	0	0	0	0	0
AC016700.3	0	0	0	0	0	0	0	0	0	1	0	0	0	0	0	0	0
AC016706.1	0	0	0	0	0	0	0	1	0	0	0	0	0	0	0	0	0
AC016725.4	1	0	0	0	0	0	0	0	0	0	0	0	0	0	0	0	0
AC016735.1	1	0	0	0	0	0	0	0	0	0	0	0	0	0	0	0	0
AC016735.2	1	0	1	0	0	0	0	0	0	0	0	0	0	0	0	0	0
AC016735.3	1	0	0	0	0	0	0	0	0	0	0	0	0	0	0	0	0
AC016738.3	0	0	0	0	0	0	1	0	0	0	0	0	0	0	0	0	0
AC016738.4	0	0	0	0	0	0	1	0	0	0	0	0	0	0	0	0	0
AC016747.3	0	0	0	0	0	0	1	1	1	0	0	0	0	0	0	0	0
AC016906.1	0	0	0	0	1	0	0	0	0	1	0	0	0	0	0	0	0
AC016907.3	1	0	0	0	0	0	0	0	0	0	0	0	0	0	0	0	0
AC017002.4	0	0	0	0	1	0	0	0	0	0	0	0	0	0	0	0	0
AC017006.2	0	0	0	0	0	0	1	0	0	0	0	0	0	0	0	0	0
AC017083.1	0	0	0	0	0	0	0	1	0	0	0	0	0	0	0	0	0
AC017083.3	0	0	0	0	0	0	0	1	0	0	0	0	0	0	0	0	0
AC017084.1	0	0	0	0	0	0	0	1	1	0	0	0	0	0	0	0	0
AC017101.10	0	0	0	0	1	0	0	0	0	0	0	0	0	0	0	0	0
AC018462.2	1	0	1	0	0	0	0	0	0	0	0	0	0	0	0	0	0
AC018705.5	0	0	0	0	0	0	0	1	1	0	0	0	0	0	0	0	0
AC018755.1	0	0	0	0	0	0	0	1	0	0	0	0	0	0	0	0	0
AC018755.16	0	0	0	0	0	0	0	1	0	0	0	0	0	0	0	0	0
AC018755.2	0	0	0	0	0	0	0	1	0	0	0	0	0	0	0	0	0
AC019131.1	0	0	0	0	0	0	1	0	0	0	0	0	0	0	0	0	0
AC019201.1	0	0	0	0	0	0	1	0	0	0	0	0	0	0	0	0	0
AC019221.4	1	0	0	0	0	0	0	1	0	0	0	0	0	0	0	0	0
AC020595.1	1	0	0	0	1	0	0	0	0	0	0	0	0	0	0	0	0
AC020626.1	0	0	0	0	0	0	0	1	0	0	0	0	0	0	0	0	0
AC020743.2	1	0	1	0	1	0	0	1	1	0	0	0	0	0	0	0	0
AC020743.3	1	1	0	0	1	0	0	0	0	0	0	0	0	0	0	0	0
AC020743.4	1	0	0	0	1	0	0	0	0	1	0	0	0	0	0	0	0
AC021016.6	1	0	0	0	0	0	0	1	1	0	0	0	0	0	0	0	0
AC021016.8	1	0	0	0	0	0	0	1	1	0	0	0	0	0	0	0	0
AC021078.1	0	0	0	0	0	0	0	1	1	0	0	0	0	0	0	0	0
AC021593.1	0	0	0	0	0	0	0	0	0	0	0	0	0	0	1	0	0
AC021860.1	1	1	1	1	0	0	0	1	1	1	0	0	0	0	0	0	0
AC022154.7	0	1	0	0	0	0	0	0	0	0	0	0	0	0	0	0	0
AC022201.4	0	0	0	0	0	0	0	1	1	0	0	0	0	0	0	0	0
AC022201.5	1	0	0	0	0	0	1	1	1	0	0	0	0	0	1	0	0
AC022400.2	1	0	0	0	0	0	0	0	0	0	0	0	0	0	0	0	0
AC022498.1	0	0	0	0	0	0	0	1	0	0	0	0	0	0	0	0	0
AC023128.2	0	0	0	0	1	0	0	0	0	0	0	0	0	0	0	0	0
AC024028.1	0	0	0	0	1	0	0	0	0	0	0	0	0	0	0	0	0
AC025165.1	1	0	0	0	0	0	1	0	0	0	0	0	0	0	0	0	0
AC025165.8	0	0	0	0	0	0	0	1	1	0	0	0	0	0	0	0	0
AC026471.6	0	0	0	0	0	0	0	1	1	0	0	0	0	0	0	0	0
AC027228.1	0	0	0	1	0	0	1	1	1	0	0	0	0	0	0	0	0
AC027320.1	0	0	0	0	0	0	1	0	0	0	0	0	0	0	0	0	0
AC034102.1	0	0	0	0	0	0	0	1	1	0	0	0	0	0	0	0	0
AC034220.3	0	0	0	0	0	0	1	1	1	1	0	0	0	0	0	0	0
AC034228.2	0	0	0	0	0	0	0	1	0	0	0	0	0	0	0	0	0
AC051649.1	1	0	0	0	0	0	0	0	0	0	0	0	0	0	0	0	0
AC051649.12	1	0	0	0	0	0	0	0	0	0	0	0	0	0	0	0	0
AC051649.6	0	0	0	0	0	0	0	1	0	0	0	0	0	0	0	0	0
AC053503.4	0	0	0	0	0	0	1	0	0	0	0	0	0	0	0	0	0
AC063976.3	0	0	0	0	0	0	0	1	0	0	0	0	0	0	0	0	0
AC064852.4	1	0	0	0	0	0	0	0	0	0	0	0	0	0	0	0	0
AC067742.1	0	0	0	0	0	0	0	1	1	0	0	0	0	0	0	0	0
AC067751.1	0	0	0	0	1	0	0	0	0	0	0	0	0	0	0	0	0
AC068196.1	1	0	0	0	0	0	0	0	0	0	0	0	0	0	1	0	0
AC068491.2	0	0	0	0	1	0	0	0	0	0	0	0	0	0	0	0	0
AC068499.10	0	0	0	0	0	0	0	1	0	0	0	0	0	0	0	0	0
AC068522.4	0	0	0	0	0	0	1	0	0	0	0	0	0	0	0	0	0
AC068580.1	1	0	0	0	0	0	0	0	0	0	0	0	0	0	0	0	0
AC068580.5	1	0	0	0	0	0	0	0	0	0	0	0	0	0	0	0	0
AC068580.6	1	0	0	0	0	0	0	0	0	0	0	0	0	0	0	0	0
AC068754.1	0	0	0	0	0	0	0	1	0	0	0	0	0	0	0	0	0
AC068831.15	1	0	0	0	0	0	0	0	0	0	0	0	0	0	0	0	0
AC068831.3	1	0	0	0	0	0	0	1	1	0	0	0	0	0	0	0	0
AC068946.1	0	0	0	0	0	0	0	1	1	0	0	0	0	0	0	0	0
AC069547.2	0	0	0	0	0	0	1	0	0	0	0	0	0	0	0	0	0
AC072031.1	0	0	0	0	0	0	0	0	0	1	0	0	0	0	0	0	0
AC072052.7	0	0	0	0	1	0	0	0	0	0	0	0	0	0	0	0	0
AC073065.3	0	0	0	0	1	0	0	0	0	0	0	0	0	0	0	0	0
AC073072.7	0	0	0	0	1	0	0	0	0	0	0	0	0	0	0	0	0
AC073254.1	1	0	1	0	0	0	0	1	1	0	0	0	0	0	0	0	0
AC073255.1	1	0	0	0	0	0	0	1	1	0	0	0	0	0	0	0	0
AC074091.1	0	0	0	0	0	0	0	1	0	0	0	0	0	0	0	0	0
AC074117.10	1	0	0	0	0	0	0	1	1	0	0	0	0	0	0	0	0
AC074289.1	0	0	0	0	0	0	1	1	1	0	0	0	0	0	0	0	0
AC074323.1	0	0	0	0	0	0	0	1	0	0	0	0	0	0	0	0	0
AC074366.3	0	0	0	0	0	0	1	0	0	0	0	0	0	0	0	0	0
AC074391.1	0	0	0	0	0	0	1	0	0	0	0	0	0	0	0	0	0
AC079603.1	0	0	0	0	0	0	0	1	0	0	0	0	0	0	0	0	0
AC079741.2	0	0	0	0	0	0	1	0	0	0	0	0	0	0	0	0	0
AC079753.1	0	0	0	0	0	0	0	1	0	0	0	0	0	0	0	0	0
AC079922.3	0	0	0	0	0	0	0	1	0	0	0	0	0	0	0	0	0
AC083949.1	0	0	0	0	0	0	0	1	1	0	0	0	0	0	0	0	0
AC087269.1	0	0	0	0	0	0	0	1	1	0	0	0	0	0	0	0	0
AC087269.2	1	0	0	0	0	0	0	0	0	0	0	0	0	0	0	0	0
AC087491.2	1	0	0	0	0	0	0	1	1	0	0	0	0	0	0	0	0
AC089999.1	0	0	0	0	0	0	1	0	0	0	0	0	0	0	0	0	0
AC090625.1	0	0	0	0	0	0	1	0	0	0	0	0	0	0	0	0	0
AC091132.2	0	0	0	0	0	0	0	1	0	0	0	0	0	0	0	0	0
AC091814.3	0	0	0	0	0	0	0	1	0	0	0	0	0	0	0	0	0
AC092038.2	0	0	0	0	1	0	0	0	0	0	0	0	0	0	0	0	0
AC092168.2	0	0	0	0	0	0	1	0	0	0	0	0	0	0	0	0	0
AC092168.3	0	0	0	0	0	0	1	0	0	0	0	0	0	0	0	0	0
AC092415.1	0	0	0	0	1	0	1	0	0	0	0	0	0	0	0	0	0
AC092566.1	0	0	0	0	1	0	0	0	0	0	0	0	0	0	0	0	0
AC092652.1	0	0	0	0	0	0	0	1	0	0	0	0	0	0	0	0	0
AC092667.2	0	0	0	0	0	0	1	0	0	0	0	0	0	0	0	0	0
AC093267.1	0	0	0	0	0	0	1	0	0	0	0	0	0	0	0	0	0
AC093391.2	0	0	0	0	0	0	1	0	0	0	0	0	0	0	0	0	0
AC093510.1	0	0	0	0	0	0	1	0	0	0	0	0	0	0	0	0	0
AC093577.1	0	0	0	0	0	0	0	1	0	0	0	0	0	0	0	0	0
AC093609.1	0	0	0	0	1	0	0	0	0	0	0	0	0	0	0	0	0
AC093642.6	0	0	0	0	0	0	0	0	0	1	0	0	0	0	0	0	0
AC093899.3	0	0	0	0	0	0	1	0	0	0	0	0	0	0	0	0	0
AC096558.1	0	0	0	0	0	0	0	1	1	0	0	0	0	0	0	0	0
AC096633.1	0	0	0	0	1	0	0	0	0	0	0	0	0	0	0	0	0
AC096670.3	1	0	0	0	0	0	1	1	1	0	0	0	0	0	0	0	0
AC097015.1	1	0	0	0	0	0	0	1	1	0	0	0	0	0	0	0	0
AC097495.2	0	0	0	0	0	0	0	1	0	0	0	0	0	0	0	0	0
AC097662.2	0	0	0	0	0	0	0	1	0	0	0	0	0	0	0	0	0
AC097721.2	0	0	0	0	0	0	0	1	0	0	0	0	0	0	0	0	0
AC098680.1	1	0	0	0	0	0	0	1	1	0	0	0	0	0	0	0	0
AC098820.2	0	0	0	0	0	0	0	1	0	0	0	0	0	0	0	0	0
AC098820.3	0	0	0	0	0	0	0	1	1	0	0	0	0	0	0	0	0
AC099506.1	0	0	0	0	1	0	0	0	0	0	0	0	0	0	0	0	0
AC099535.1	0	0	0	0	0	0	0	1	1	0	0	0	0	0	0	0	0
AC099535.4	0	0	0	0	0	0	1	0	0	0	0	0	0	0	0	0	0
AC099668.5	0	0	0	0	1	0	0	0	0	0	0	0	0	0	0	0	0
AC104076.3	0	0	0	0	0	0	0	1	1	0	0	0	0	0	0	0	0
AC104782.3	0	0	0	0	1	0	1	0	0	0	0	0	0	0	0	0	0
AC104820.2	1	0	1	0	1	0	0	0	0	1	0	0	0	0	0	0	0
AC105941.1	0	0	0	0	0	0	0	1	1	0	0	0	0	0	0	0	0
AC106876.2	0	0	0	0	0	0	0	1	0	0	0	0	0	0	0	0	0
AC107081.5	0	0	0	0	0	0	1	1	1	0	0	0	0	0	0	0	0
AC107993.1	1	0	0	0	1	0	0	1	1	0	0	0	0	0	0	0	0
AC108059.1	0	0	0	0	0	0	1	0	0	0	0	0	0	0	0	0	0
AC108105.1	0	0	0	0	1	0	0	0	0	0	0	0	0	0	0	0	0
AC108488.4	0	0	0	0	0	0	1	0	0	0	0	0	0	0	0	0	0
AC109333.10	0	0	0	0	0	0	0	1	1	0	0	0	0	0	0	0	0
AC109631.1	0	0	0	0	0	0	1	0	0	0	0	0	0	0	0	0	0
AC109642.1	0	0	0	0	0	0	1	0	0	0	0	0	0	0	0	0	0
AC109925.1	0	0	0	0	0	0	0	1	1	0	0	0	0	0	0	0	0
AC112211.3	0	0	0	0	0	0	1	0	0	0	0	0	0	0	0	0	0
AC112249.1	0	0	0	0	0	0	0	1	0	0	0	0	0	0	0	0	0
AC112721.2	0	0	0	0	0	0	1	0	0	0	0	0	0	0	0	0	0
AC114546.1	0	0	0	1	0	0	0	1	1	0	0	0	0	0	0	0	0
AC114730.7	0	0	0	0	1	0	0	0	0	0	0	0	0	0	0	0	0
AC114730.8	1	0	0	0	0	0	0	0	0	0	0	0	0	0	0	0	0
AC114803.3	0	0	0	0	0	0	0	1	1	0	0	0	0	0	0	0	0
AC114812.8	0	0	0	0	0	0	0	1	0	0	0	0	0	0	0	0	0
AC116366.5	1	0	0	0	1	0	1	1	1	0	0	0	0	0	0	0	0
AC116366.6	1	0	0	0	0	0	0	1	1	0	0	0	0	0	0	0	0
AC121336.1	0	0	0	0	0	0	0	1	0	0	0	0	0	0	0	0	0
AC124057.5	0	0	0	0	0	0	0	1	1	0	0	0	0	0	0	0	0
AC125238.1	1	0	0	0	1	0	0	0	0	0	0	0	0	0	0	0	0
AC130469.2	0	0	0	0	0	0	0	1	0	0	0	0	0	0	0	0	0
AC130709.1	0	0	0	0	0	0	0	0	0	1	0	0	0	0	0	0	0
AC131097.3	1	0	0	0	0	0	0	0	0	0	0	0	0	0	0	0	0
AC132479.4	0	0	0	0	0	0	1	0	0	0	0	0	0	0	0	0	0
AC133528.2	1	0	0	0	0	0	0	1	0	0	0	0	0	0	0	0	0
AC133785.1	0	0	0	0	0	0	1	0	0	0	0	0	0	0	0	0	0
AC135048.1	0	0	0	0	0	0	0	1	1	0	0	0	0	0	0	0	0
AC135050.1	1	0	0	0	0	0	0	1	0	0	0	0	0	0	0	0	0
AC135050.5	1	0	0	0	0	0	0	1	0	0	0	0	0	0	0	0	0
AC139451.1	0	0	0	0	0	0	1	0	0	0	0	0	0	0	0	0	0
AC139887.4	1	0	1	0	0	0	0	0	0	0	0	0	0	0	0	0	0
AC142528.1	0	0	0	0	0	0	0	1	1	0	0	0	0	0	0	0	0
AC144521.1	1	1	1	0	1	0	0	1	1	0	0	0	0	0	0	0	0
AC144652.1	0	0	0	0	0	0	1	0	0	0	0	0	0	0	0	0	0
AC195454.1	0	0	0	0	1	0	0	0	0	0	0	0	0	0	0	0	0
ACA64	1	0	0	0	0	0	1	1	0	0	0	0	0	0	0	0	0
ACAA2	0	0	0	0	0	0	0	1	0	0	0	0	0	0	0	0	0
ACAD10	0	0	0	0	0	0	1	0	0	0	0	0	0	0	0	0	0
ACAD11	0	0	0	0	0	0	1	0	0	0	0	0	0	0	0	0	0
ACADS	0	0	0	0	0	0	0	1	0	0	0	0	0	0	0	0	0
ACADSB	0	0	0	0	0	0	1	1	0	0	0	0	0	0	0	0	0
ACAP3	1	1	1	1	1	0	1	1	1	0	0	0	0	0	0	0	0
ACAT2	0	0	0	0	0	0	1	1	0	0	0	0	0	0	0	0	0
ACBD4	0	0	0	0	0	0	0	1	0	0	0	0	0	0	0	0	0
ACD	0	0	0	0	0	0	0	0	0	0	0	0	0	0	0	0	1
ACLY	0	0	0	0	0	0	1	1	0	0	0	0	0	0	0	0	0
ACO1	0	0	0	1	0	0	0	1	1	0	0	0	0	0	0	0	0
ACO2	1	0	1	1	0	0	0	1	1	0	1	1	0	0	0	0	0
ACOX2	1	0	0	1	0	0	1	1	1	0	0	0	0	0	0	0	0
ACOXL	0	0	0	0	1	0	0	1	0	0	0	0	0	0	0	0	0
ACP5	0	0	0	0	0	0	0	0	0	0	0	0	0	0	0	0	1
ACPL2	1	0	1	0	0	0	0	1	0	0	0	0	0	0	0	0	0
ACRBP	0	0	0	1	0	0	1	1	1	0	1	1	0	0	0	0	0
ACSF3	0	0	0	0	0	0	0	1	0	0	0	0	0	0	0	0	0
ACSL5	0	0	0	0	0	0	1	1	0	0	0	0	0	0	0	0	0
ACSL6	0	0	0	0	0	0	0	1	0	0	0	0	0	0	0	0	0
ACSM4	0	0	0	0	0	0	0	0	0	0	1	1	0	0	0	0	0
ACTA2	0	0	0	0	0	1	1	0	0	1	0	0	0	0	0	0	0
ACTA2-AS1	1	0	0	0	0	0	0	0	0	0	0	0	0	0	0	0	0
ACTB	0	0	0	0	0	0	0	0	0	0	0	0	0	0	0	0	1
ACTR10	0	0	0	0	0	0	1	1	0	0	0	0	0	0	0	0	0
ACTR1A	1	1	1	0	0	1	0	0	0	0	0	0	0	0	0	0	0
ACTR2	0	0	0	1	0	0	0	1	1	0	0	0	0	0	0	0	0
ACTR3	0	0	0	0	0	0	1	1	0	0	0	0	0	0	0	0	0
ACTR3P3	0	0	0	0	0	0	0	0	0	1	0	0	0	0	0	0	0
ACTR8	0	0	0	1	0	0	1	1	1	0	0	0	0	0	0	0	0
ACTRT3	0	0	0	0	0	0	1	0	0	0	0	0	0	0	0	0	0
ACYP1	0	0	0	0	0	0	0	1	0	0	0	0	0	0	0	0	0
ACYP2	1	0	0	0	0	0	0	0	0	0	0	0	0	0	0	0	0
ADA	0	0	0	0	0	0	0	0	0	0	0	0	0	0	0	0	1
ADA2	0	0	0	0	0	0	0	0	0	0	0	0	0	0	0	0	1
ADAD1	0	0	0	0	1	0	0	0	0	0	0	0	0	0	0	0	0
ADAM15	1	0	1	0	1	1	0	1	0	1	0	0	0	0	0	0	0
ADAM17	0	0	0	0	0	0	0	0	0	0	0	0	0	0	0	0	1
ADAM30	0	0	0	1	0	0	0	1	1	0	0	0	0	0	0	0	0
ADAM8	0	0	0	0	0	0	1	0	0	0	0	0	0	0	0	0	0
ADAMTS10	0	0	0	0	0	0	0	1	0	0	0	0	0	0	0	0	0
ADAMTS12	0	0	0	0	0	0	0	0	0	0	1	0	0	0	0	0	0
ADAMTS4	0	0	0	1	0	0	0	1	1	0	0	0	0	0	0	0	0
ADAMTSL4	0	0	0	0	0	0	0	1	0	0	0	0	0	0	0	0	0
ADAMTSL4-AS1	0	0	0	0	0	0	0	1	0	0	0	0	0	0	0	0	0
ADAR	1	0	1	1	0	0	0	1	1	0	0	0	0	0	0	0	0
ADAR1	0	0	0	0	0	0	0	0	0	0	0	0	0	0	0	0	1
ADCY3	0	1	0	0	1	0	0	0	0	1	1	1	0	1	0	0	0
ADCY7	1	0	1	1	1	1	0	1	1	1	0	1	0	0	0	0	0
ADD1	0	0	0	0	0	0	0	1	0	0	0	0	0	0	0	0	0
ADD2	1	0	1	0	0	0	0	1	0	1	0	0	0	0	0	0	0
ADD3	0	0	0	0	0	0	1	1	0	1	0	0	0	0	0	0	0
ADI1	0	0	0	0	0	0	1	1	1	0	0	0	0	0	0	0	0
ADK	0	0	0	0	0	0	0	0	0	1	0	0	0	0	0	0	0
ADM5	0	1	0	0	0	0	1	0	0	0	0	0	0	0	0	0	0
ADNP	0	0	0	0	0	0	0	0	0	0	0	1	0	0	0	0	0
ADNP-AS1	0	0	0	0	0	0	0	0	0	0	0	1	0	0	0	0	0
ADO	1	0	1	1	0	0	1	1	1	0	1	1	0	0	0	0	0
ADORA2BP	0	0	0	0	0	0	1	1	1	0	0	0	0	0	0	0	0
ADPRH	0	0	0	0	0	0	0	1	0	0	0	0	0	0	0	0	0
ADRA1B	0	0	0	1	0	0	0	1	1	0	0	0	0	0	0	0	0
ADRB1	0	0	0	0	0	0	0	1	0	0	0	0	0	0	0	0	0
ADRBK1	0	0	0	1	0	0	0	1	1	0	0	0	0	0	0	0	0
AEN	0	0	0	0	0	0	1	0	0	0	0	0	0	0	0	0	0
AF127577.10	0	0	0	0	0	0	0	1	1	0	0	0	0	0	0	0	0
AF127577.11	0	0	0	0	0	0	0	1	1	0	0	0	0	0	0	0	0
AF127577.12	0	0	0	0	0	0	0	1	1	0	0	0	0	0	0	0	0
AF127577.8	0	0	0	0	0	0	0	1	0	0	0	0	0	0	0	0	0
AF131215.9	0	0	0	0	0	0	0	0	0	1	0	0	0	0	0	0	0
AF131216.6	0	0	0	0	0	0	0	1	0	1	0	0	0	0	0	0	0
AF213884.2	1	0	0	0	0	0	1	1	1	0	0	0	0	0	0	0	0
AF213884.3	0	0	0	0	0	0	0	1	1	0	0	0	0	0	0	0	0
AF224669.3	0	0	0	0	1	0	0	0	0	0	0	0	0	0	0	0	0
AFDN	0	0	0	0	0	0	0	0	0	0	1	0	0	0	0	0	0
AFDN-AS1	0	0	0	0	0	0	0	0	0	0	1	0	0	0	0	0	0
AFF3	0	1	0	0	1	0	1	0	0	0	0	0	0	0	0	0	0
AFF4	0	0	0	0	0	0	1	1	0	0	0	0	0	0	0	0	0
AFG3L2	0	0	0	1	0	0	0	1	1	0	0	0	0	0	0	0	0
AFMID	0	1	0	0	0	0	0	0	0	1	0	0	0	0	0	0	0
AGAP2	1	0	1	1	0	0	1	1	1	0	0	0	0	0	0	0	0
AGAP2-AS1	0	0	0	0	0	0	0	1	1	0	0	0	0	0	0	0	0
AGBL2	0	0	0	0	1	0	0	0	0	1	0	0	0	0	0	0	0
AGFG1	0	0	0	1	0	0	1	1	1	0	0	0	0	0	0	0	0
AGL	0	0	0	1	0	0	0	1	1	0	0	0	0	0	0	0	0
AGPAT1	0	0	0	0	0	0	0	1	0	0	0	0	0	0	0	0	0
AGPAT2	0	0	0	0	0	0	0	1	0	0	0	0	0	0	0	0	0
AGPAT4	0	0	0	0	0	0	1	0	0	0	0	0	0	0	0	0	0
AGPAT5	0	0	0	1	0	0	1	1	1	0	0	0	0	0	0	0	0
AGRN	1	0	1	1	0	0	1	1	1	0	0	0	0	0	0	0	0
AGXT	0	0	0	0	0	0	0	1	0	0	0	0	0	0	0	0	0
AGXT2	1	0	0	1	0	0	0	1	1	0	0	0	0	0	0	0	0
AHCYP2	0	0	0	0	0	0	1	0	0	0	0	0	0	0	0	0	0
AHI1	0	0	0	0	1	1	0	0	0	1	0	0	0	0	0	0	0
AHNAK	0	0	0	0	0	0	1	0	0	0	0	0	0	0	0	0	0
AHNAK2	0	0	0	0	0	0	0	1	0	0	0	0	0	0	0	0	0
AHR	0	0	0	0	0	0	1	0	0	0	0	0	0	0	0	0	0
AHSA1	0	0	0	0	0	0	1	0	0	0	0	0	0	0	0	0	0
AHSA2	0	0	0	1	0	0	1	1	1	1	0	0	0	0	0	0	0
AHSP	0	0	0	1	0	0	0	1	1	0	0	0	0	0	0	0	0
AICDA	0	0	0	0	0	0	0	0	0	0	0	0	0	0	0	0	1
AIF1	1	0	1	1	0	0	1	1	1	1	0	0	0	0	0	0	0
AIM1	0	0	0	0	0	0	1	0	0	0	0	0	0	0	0	0	0
AIMP1	0	0	0	0	0	0	1	1	0	0	0	0	0	0	0	0	0
AIMP1P2	0	0	0	0	1	0	0	0	0	0	0	0	0	0	0	0	0
AIMP2	1	0	1	0	0	0	1	0	0	0	0	0	0	0	0	0	0
AIRE	1	0	0	0	0	0	0	0	0	0	0	0	0	0	0	0	1
AJ006998.2	0	0	0	0	1	0	0	0	0	0	0	0	0	0	0	0	0
AK2	0	0	0	0	0	0	0	0	0	0	0	0	0	0	0	0	1
AK3P5	0	0	0	0	0	0	1	0	0	0	0	0	0	0	0	0	0
AKAP11	0	1	0	0	0	1	0	1	0	1	1	1	0	1	0	0	0
AKNA	0	0	0	0	0	0	1	0	0	0	0	0	0	0	0	0	0
AKR1C3	0	0	0	0	0	0	0	0	0	0	1	0	0	0	0	0	0
AKR1D1P1	0	0	0	0	0	0	1	1	1	0	0	0	0	0	0	0	0
AKT1S1	0	0	0	0	0	0	0	0	0	0	0	0	1	0	0	0	0
AL022314.1	1	1	0	0	1	0	0	1	1	0	0	0	0	0	0	0	0
AL031590.1	0	0	0	0	1	0	0	0	0	0	0	0	0	0	0	0	0
AL031663.2	0	0	0	0	0	0	1	0	0	0	0	0	0	0	0	0	0
AL031721.1	0	0	0	0	0	0	1	0	0	0	0	0	0	0	0	0	0
AL035588.1	0	0	0	0	0	0	0	0	0	1	0	0	0	0	0	0	0
AL049539.1	0	0	0	0	1	0	0	0	0	0	0	0	0	0	0	0	0
AL079339.1	0	0	0	0	0	0	1	0	0	0	0	0	0	0	0	0	0
AL109767.1	1	0	0	0	0	0	0	1	0	0	0	0	0	0	0	0	0
AL109843.1	0	0	0	0	1	0	0	1	1	0	0	0	0	0	0	0	0
AL109927.1	0	0	0	0	0	0	1	0	0	0	0	0	0	0	0	0	0
AL117209.1	1	0	0	0	0	0	1	1	1	0	0	0	0	0	0	0	0
AL118506.1	1	0	0	0	0	0	0	1	0	0	0	0	0	0	0	0	0
AL118525.1	1	0	0	0	0	0	0	0	0	0	0	0	0	0	0	0	0
AL121594.1	1	1	0	0	0	0	0	0	0	0	0	0	0	0	0	0	0
AL133318.1	1	0	0	0	0	0	0	0	0	0	0	0	0	0	0	0	0
AL133458.1	0	0	0	0	0	0	1	0	0	1	0	0	0	0	0	0	0
AL136987.1	1	0	0	0	0	0	1	1	1	0	0	0	0	0	0	0	0
AL138930.1	1	0	0	0	0	0	0	1	1	0	0	0	0	0	0	0	0
AL138930.2	1	0	0	0	0	0	0	0	0	0	0	0	0	0	0	0	0
AL138963.1	0	0	0	0	0	0	0	1	0	0	0	0	0	0	0	0	0
AL139099.1	0	0	0	0	0	0	1	1	0	0	0	0	0	0	0	0	0
AL157904.1	0	0	0	0	0	0	0	1	1	0	0	0	0	0	0	0	0
AL158091.1	0	0	0	0	0	0	0	1	1	0	0	0	0	0	0	0	0
AL161450.1	0	0	0	0	1	0	0	0	0	0	0	0	0	0	0	0	0
AL162151.4	1	0	0	0	0	0	0	0	0	0	0	0	0	0	0	0	0
AL162311.1	0	0	0	0	0	0	1	1	1	0	0	0	0	0	0	0	0
AL162458.1	0	0	0	0	0	0	1	1	1	0	0	0	0	0	0	0	0
AL353671.1	0	0	0	0	0	0	0	1	1	0	0	0	0	0	0	0	0
AL353671.2	0	0	0	0	0	0	0	1	1	0	0	0	0	0	0	0	0
AL355512.1	1	0	0	0	1	0	0	1	1	0	0	0	0	0	0	0	0
AL355512.2	1	0	0	0	0	0	0	0	0	0	0	0	0	0	0	0	0
AL356020.1	0	0	0	0	0	0	1	0	0	0	0	0	0	0	0	0	0
AL356215.1	1	0	0	0	1	0	0	0	0	0	0	0	0	0	0	0	0
AL356310.1	0	0	0	0	0	0	0	1	0	0	0	0	0	0	0	0	0
AL356356.1	0	0	0	0	0	0	0	1	0	0	0	0	0	0	0	0	0
AL357060.1	1	0	0	0	0	0	0	1	1	0	0	0	0	0	0	0	0
AL359546.1	0	0	0	0	1	0	0	0	0	0	0	0	0	0	0	0	0
AL359878.1	0	0	0	0	0	0	0	1	0	0	0	0	0	0	0	0	0
AL391559.1	1	0	0	0	0	0	1	1	1	0	0	0	0	0	0	0	0
AL391839.1	0	0	0	0	0	0	0	1	0	0	0	0	0	0	0	0	0
AL450992.2	0	0	0	0	0	0	0	1	0	0	0	0	0	0	0	0	0
AL450992.6	0	0	0	0	0	0	0	0	0	1	0	0	0	0	0	0	0
AL451051.1	0	0	0	0	0	0	0	1	1	0	0	0	0	0	0	0	0
AL512505.1	0	0	0	0	0	0	1	1	0	0	0	0	0	0	0	0	0
AL583784.1	1	0	0	0	1	0	0	0	0	0	0	0	0	0	0	0	0
AL589765.1	0	0	0	0	0	0	0	1	0	0	0	0	0	0	0	0	0
AL590113.1	0	0	0	0	1	0	0	0	0	0	0	0	0	0	0	0	0
AL590226.1	0	0	0	0	0	0	0	1	0	0	0	0	0	0	0	0	0
AL590703.1	0	0	0	0	0	0	0	0	0	1	0	0	0	0	0	0	0
AL590822.1	0	0	0	0	0	0	0	1	0	0	0	0	0	0	1	0	0
AL590822.2	1	0	0	0	0	0	0	1	1	0	0	0	0	0	0	0	0
AL591025.1	1	0	0	1	0	0	0	1	1	1	0	0	0	0	0	0	0
AL606500.1	1	0	0	0	0	0	0	0	0	0	0	0	0	0	0	0	0
AL645608.1	0	0	0	0	0	0	0	1	0	0	0	0	0	0	0	0	0
AL645728.1	0	0	0	1	0	0	0	1	1	0	0	0	0	0	0	0	0
AL645728.3	0	0	0	0	0	0	0	1	1	0	0	0	0	0	0	0	0
ALDH16A1	0	0	0	0	0	0	0	1	1	0	0	0	0	0	0	0	0
ALDH18A1	0	0	0	0	0	0	1	0	0	0	0	0	0	0	0	0	0
ALDH7A1	0	0	0	0	0	0	1	0	0	0	0	0	0	0	0	0	0
ALG1L13P	0	0	0	0	1	0	0	0	0	1	0	0	0	0	0	0	0
ALG5	0	0	0	0	0	0	1	1	0	0	0	0	0	0	0	0	0
ALG9	1	0	0	1	0	0	0	1	1	0	0	0	0	0	0	0	0
ALG9-IT1	1	0	0	0	0	0	0	0	0	0	0	0	0	0	0	0	0
ALKBH1	0	0	0	0	0	0	1	0	0	0	0	0	0	0	0	0	0
ALMS1	0	0	0	0	0	0	1	1	1	0	0	0	0	0	0	0	0
ALOX15	0	0	0	0	0	0	0	1	1	0	0	0	0	0	0	0	0
ALPI	0	0	0	0	0	0	0	0	0	0	0	0	0	0	0	0	1
ALPK1	0	0	0	0	0	0	1	0	0	0	0	0	0	0	0	0	0
ALS2CR11	0	0	0	0	0	0	0	1	0	0	0	0	0	0	0	0	0
ALS2CR12	1	1	0	0	1	0	0	1	0	0	0	0	0	0	0	0	0
ALYREF	0	0	0	0	0	0	1	0	0	0	0	0	0	0	0	0	0
AMICA1	0	0	0	1	0	0	0	1	1	0	0	0	0	0	0	0	0
AMN	1	0	1	1	0	0	0	1	1	0	1	1	0	0	0	0	0
ANAPC11	0	0	0	0	0	0	1	0	0	0	0	0	0	0	0	0	0
ANAPC15	0	0	0	0	0	0	1	0	0	0	0	0	0	0	0	0	0
ANAPC2	0	0	0	0	0	0	1	0	0	0	0	0	0	0	0	0	0
ANGEL1	0	0	0	0	0	0	1	0	0	0	0	0	0	0	0	0	0
ANGEL2	0	0	0	0	0	0	1	1	1	0	0	0	0	0	0	0	0
ANGPTL3	0	0	0	0	1	0	0	0	0	0	0	0	0	0	0	0	0
ANGPTL6	0	0	0	0	0	0	1	1	1	0	0	0	0	0	0	0	0
ANK3	0	0	0	0	0	0	1	0	0	0	1	0	0	0	0	0	0
ANKH	0	0	0	1	0	0	1	1	1	0	0	0	0	0	0	0	0
ANKIB1	0	0	0	0	0	1	0	0	0	0	0	0	0	0	0	0	0
ANKLE2	0	0	0	0	0	0	1	0	0	0	0	0	0	0	0	0	0
ANKMY1	0	0	0	0	0	0	0	1	0	0	0	0	0	0	0	0	0
ANKMY2	0	0	0	0	0	0	1	0	0	0	0	0	0	0	0	0	0
ANKRA2	0	0	0	0	0	0	1	0	0	0	0	0	0	0	0	0	0
ANKRD12	0	0	0	1	0	0	1	1	1	0	0	0	0	0	0	0	0
ANKRD13D	0	0	0	1	0	0	0	1	1	0	0	0	0	0	0	0	0
ANKRD16	0	0	0	0	0	0	0	1	0	0	1	1	0	0	0	0	0
ANKRD33B	0	0	0	1	0	0	0	1	1	1	0	0	0	0	0	0	0
ANKRD33B-AS1	0	0	0	0	0	0	0	1	0	0	0	0	0	0	0	0	0
ANKRD44-IT1	0	0	0	0	0	0	0	0	0	1	0	0	0	0	0	0	0
ANKRD52	1	0	1	0	0	0	1	0	0	0	0	0	0	0	0	0	0
ANKRD53	0	0	0	0	0	0	0	1	0	0	0	0	0	0	0	0	0
ANKRD55	1	0	1	0	0	1	0	0	0	1	0	0	0	0	0	0	0
ANKRD61	0	0	0	0	0	0	0	1	0	0	0	0	0	0	0	0	0
ANKRD63	0	0	0	0	0	0	1	0	0	0	0	0	0	0	0	0	0
ANKRD65	1	0	0	0	0	0	0	0	0	0	0	0	0	0	0	0	0
ANKZF1	0	0	0	1	0	0	1	1	1	0	0	0	0	0	0	0	0
ANLN	0	0	0	0	0	0	0	1	0	0	1	1	0	0	0	0	0
ANO7	0	0	0	0	0	0	0	1	0	0	0	0	0	0	0	0	0
ANP32A	0	0	0	0	0	0	1	0	0	0	0	0	0	0	0	0	0
ANTXR1	0	0	0	1	0	0	0	1	1	0	0	0	0	0	0	0	0
ANXA1	0	0	0	0	0	0	1	0	0	0	0	0	0	0	0	0	0
ANXA11	1	0	1	1	0	1	1	1	1	0	0	0	0	0	0	0	0
ANXA6	0	0	0	1	0	0	0	1	1	0	0	0	0	0	0	0	0
AOAH	0	0	0	0	0	0	0	0	0	0	1	1	0	0	0	0	0
AOAH-IT1	0	0	0	0	0	0	0	0	0	0	0	1	0	0	0	0	0
AP000281.1	0	0	0	0	0	0	1	1	1	0	0	0	0	0	0	0	0
AP000281.2	0	0	0	0	0	0	1	1	1	0	0	0	0	0	0	0	0
AP000282.2	0	0	0	0	0	0	1	1	0	0	0	0	0	0	0	0	0
AP000289.6	1	0	0	0	0	0	1	0	0	0	0	0	0	0	0	0	0
AP000290.7	0	0	0	0	0	0	0	1	1	0	0	0	0	0	0	0	0
AP000295.10	0	1	0	0	0	0	1	0	0	0	0	0	0	0	0	0	0
AP000295.9	1	0	0	1	0	0	1	1	1	0	0	0	0	0	0	0	0
AP000302.58	1	0	0	0	0	0	0	1	0	0	0	0	0	0	0	0	0
AP000304.12	0	0	0	0	0	0	1	0	0	0	0	0	0	0	0	0	0
AP000688.14	0	0	0	0	0	0	1	0	0	0	0	0	0	0	0	0	0
AP000783.1	0	0	0	0	0	0	1	0	0	0	0	0	0	0	0	0	0
AP001046.5	1	0	0	0	0	0	0	0	0	1	0	0	0	0	0	0	0
AP001046.6	1	0	0	0	0	0	0	0	0	0	0	0	0	0	0	0	0
AP001055.6	1	0	0	0	0	0	0	0	0	0	0	0	0	0	0	0	0
AP001057.1	1	0	0	0	1	0	0	0	0	0	0	0	0	0	0	0	0
AP001058.3	1	1	0	0	0	0	0	0	0	0	0	0	0	0	0	0	0
AP001092.4	1	0	0	0	0	0	0	1	0	0	0	0	0	0	0	0	0
AP001362.1	0	0	0	0	0	0	0	1	0	0	0	0	0	0	0	0	0
AP001631.10	0	0	0	0	0	0	0	1	1	0	0	0	0	0	0	0	0
AP001631.9	0	0	0	0	0	0	0	1	0	0	0	0	0	0	0	0	0
AP001816.1	0	1	0	0	0	0	0	1	0	1	0	0	0	0	0	0	0
AP002490.1	0	0	0	0	0	0	1	0	0	0	0	0	0	0	0	0	0
AP002954.4	1	0	1	0	0	0	1	1	1	0	0	0	0	0	0	0	0
AP002954.6	0	0	0	0	1	0	0	0	0	0	0	0	0	0	0	0	0
AP003064.2	1	0	0	0	0	0	0	0	0	0	0	0	0	0	0	0	0
AP003068.12	0	0	0	0	0	0	1	0	0	0	0	0	0	0	0	0	0
AP003419.11	0	0	0	0	0	0	1	0	0	0	0	0	0	0	0	0	0
AP003733.1	1	0	0	1	0	0	1	1	1	0	0	0	0	0	0	0	0
AP003774.1	1	0	0	0	1	1	0	0	0	1	0	0	0	0	0	0	0
AP003774.4	0	0	0	0	0	0	0	1	0	0	0	0	0	0	0	0	0
AP003774.6	0	0	0	0	1	0	0	0	0	1	0	0	0	0	0	0	0
AP005273.1	1	0	0	0	0	0	0	0	0	0	0	0	0	0	0	0	0
AP005718.1	0	0	0	0	0	0	0	1	0	0	0	0	0	0	0	0	0
AP006285.6	0	0	0	0	0	0	0	1	1	0	0	0	0	0	0	0	0
AP006288.1	0	0	0	0	1	0	0	0	0	0	0	0	0	0	0	0	0
AP1M1	0	0	0	1	0	0	0	1	1	0	0	0	0	0	0	0	0
AP1M2	1	0	0	0	0	0	0	0	0	0	0	0	0	0	0	0	0
AP1S3	0	0	0	0	0	0	0	0	0	0	0	0	0	0	0	0	1
AP2A1	0	0	0	0	0	0	0	1	0	0	0	0	0	0	0	0	0
AP2M1	0	0	0	0	0	0	1	0	0	0	0	0	0	0	0	0	0
AP2S1	0	0	0	0	0	0	1	0	0	0	0	0	0	0	0	0	0
AP3B1	0	0	0	0	0	0	0	0	0	0	0	0	0	0	0	0	1
AP3D1	0	0	0	0	0	0	0	0	0	0	0	0	0	0	0	0	1
AP3S1	0	0	0	0	0	0	1	0	0	0	0	0	0	0	0	0	0
AP4B1	0	0	0	1	0	0	0	1	1	0	0	0	0	0	0	0	0
AP5B1	1	0	0	0	0	0	0	0	0	0	0	0	0	0	0	0	0
AP5M1	0	0	0	0	0	0	1	0	0	0	0	0	0	0	0	0	0
AP5Z1	0	0	0	0	0	0	0	1	0	0	0	0	0	0	0	0	0
APBB1IP	0	0	0	0	0	0	1	0	0	0	0	0	0	0	0	0	0
APC	0	0	0	0	0	0	1	0	0	0	0	0	0	0	0	0	0
APEH	0	0	0	0	0	1	0	0	0	0	0	0	0	0	0	0	0
APEX1	0	0	0	1	0	0	1	1	1	0	0	0	0	0	0	0	0
APH1A	1	0	1	0	0	0	0	0	0	0	0	0	0	0	0	0	0
APIP	1	0	1	1	0	1	1	1	1	1	1	1	0	0	0	0	0
APLF	0	0	0	0	0	0	1	0	0	0	0	0	0	0	0	0	0
APOA2	0	0	0	0	0	0	0	1	0	0	0	0	0	0	0	0	0
APOBEC3B	1	0	0	0	0	0	0	0	0	0	0	0	0	0	0	0	0
APOBEC3B-AS1	0	0	0	0	0	0	0	1	1	0	0	0	0	0	0	0	0
APOBEC3C	1	0	1	0	0	0	0	0	0	0	0	0	0	0	0	0	0
APOBEC3D	1	0	1	0	0	0	0	0	0	0	0	0	0	0	0	0	0
APOBR	1	1	0	1	0	0	0	1	1	1	0	0	0	0	0	0	0
APOF	0	0	0	0	0	0	1	0	0	0	0	0	0	0	0	0	0
APOL1	0	0	0	0	0	0	0	0	0	0	0	0	0	0	0	0	1
APOL3	0	0	0	0	0	0	1	0	0	0	0	0	0	0	0	0	0
APOL6	0	0	0	0	0	0	0	1	0	0	0	0	0	0	0	0	0
APOLD1	0	0	0	1	0	0	0	1	1	0	0	0	0	0	0	0	0
APOM	1	0	0	1	0	0	0	1	1	0	0	0	0	0	0	0	0
APTX	0	0	0	1	0	0	0	1	1	0	0	0	0	0	0	0	0
AQP10	0	0	0	1	0	0	0	1	1	0	0	0	0	0	0	0	0
AQP2	0	0	0	0	1	0	0	0	0	0	0	0	0	0	0	0	0
AQP5	0	0	0	0	0	0	0	1	0	0	0	0	0	0	0	0	0
AQR	0	0	0	1	0	0	1	1	1	0	0	0	0	0	0	0	0
ARAP1	0	0	0	0	0	0	1	0	0	0	0	0	0	0	0	0	0
ARAP1-AS1	0	0	0	0	0	0	1	0	0	0	0	0	0	0	0	0	0
ARAP2	0	0	0	0	0	0	1	1	1	0	0	0	0	0	0	0	0
ARAP3	1	0	0	1	0	0	0	1	1	0	1	1	0	0	1	0	0
AREL1	0	0	0	0	0	0	1	0	0	0	0	0	0	0	0	0	0
ARFRP1	1	1	0	0	0	0	0	0	0	1	1	1	0	0	0	0	0
ARHGAP12	1	0	1	0	0	0	1	0	0	0	0	0	0	0	0	0	0
ARHGAP15	0	1	0	0	1	0	0	0	0	0	0	0	0	0	0	0	0
ARHGAP21	0	0	0	0	0	0	1	0	0	0	0	0	0	0	0	0	0
ARHGAP22	0	0	0	0	0	0	0	1	0	0	0	0	0	0	0	0	0
ARHGAP26-AS1	0	0	0	0	0	0	0	1	0	0	0	0	0	0	0	0	0
ARHGAP27	0	0	0	0	0	0	0	1	0	0	0	0	0	0	0	0	0
ARHGAP30	0	0	0	0	0	0	0	1	0	0	0	0	0	0	0	0	0
ARHGAP31	0	0	0	1	0	0	0	1	1	0	0	0	0	0	0	0	0
ARHGAP32	0	0	0	0	0	0	1	0	0	0	0	0	0	0	0	0	0
ARHGAP45	0	0	0	0	0	0	0	0	0	0	1	1	0	0	0	0	0
ARHGAP5	0	0	0	0	0	0	1	0	0	0	0	0	0	0	0	0	0
ARHGAP5-AS1	0	0	0	0	0	0	1	0	0	0	0	0	0	0	0	0	0
ARHGAP9	0	0	0	0	0	0	0	1	0	0	0	0	0	0	0	0	0
ARHGEF1	0	0	0	0	0	0	0	0	0	0	0	0	0	0	0	0	1
ARHGEF16	0	0	0	0	0	0	0	1	0	0	0	0	0	0	0	0	0
ARHGEF25	0	0	0	1	0	0	0	1	1	0	0	0	0	0	0	0	0
ARHGEF3	0	0	0	0	0	0	1	0	0	0	0	0	0	0	0	0	0
ARHGEF37	0	0	0	0	0	0	1	0	0	0	0	0	0	0	0	0	0
ARHGEF4	0	0	0	0	0	0	1	0	0	0	0	0	0	0	0	0	0
ARID1B	0	0	0	0	1	0	0	0	0	0	0	0	0	0	0	0	0
ARID3A	1	0	1	0	0	0	1	1	0	0	0	1	0	0	0	0	0
ARID3B	0	0	0	0	0	0	0	1	0	1	1	1	0	0	0	0	0
ARID4A	0	0	0	0	0	0	1	1	0	0	0	0	0	0	0	0	0
ARID5B	1	0	1	1	1	1	1	1	1	0	1	1	0	0	1	0	0
ARIH1	0	0	0	0	0	0	0	1	0	0	0	0	0	0	0	0	0
ARL10	0	0	0	0	0	0	0	1	0	0	0	0	0	0	0	0	0
ARL14EP	0	0	0	1	0	0	0	1	1	0	0	0	0	0	0	0	0
ARL17A	0	0	0	0	0	0	0	0	0	1	0	0	0	0	0	0	0
ARL17B	0	0	0	0	0	0	0	0	0	1	0	0	0	0	0	0	0
ARL3	1	0	1	0	0	0	0	0	0	0	0	0	0	0	0	0	0
ARL5B	0	0	0	1	0	0	1	1	1	0	0	0	0	0	0	0	0
ARL5B-AS1	0	0	0	0	0	0	1	1	1	0	0	0	0	0	0	0	0
ARL6IP4	1	0	0	1	0	1	0	1	1	0	0	1	0	0	0	0	0
ARL6IP5	0	0	0	0	0	0	0	1	0	0	0	0	0	0	0	0	0
ARMC5	1	0	1	1	0	0	0	1	1	0	0	0	0	0	0	0	0
ARMC7	1	0	0	0	0	0	0	1	0	0	0	0	0	0	0	0	0
ARMC8	0	0	0	0	0	0	1	0	0	0	0	0	0	0	0	0	0
ARPC1A	1	0	1	0	0	0	0	1	0	0	0	0	0	0	0	0	0
ARPC1B	0	0	0	0	0	0	0	0	0	0	0	0	0	0	0	0	1
ARPC2	1	0	1	1	0	0	1	1	1	1	1	1	0	0	0	0	0
ARRB2	0	0	0	0	0	0	0	1	0	0	0	0	0	0	0	0	0
ARRDC2	1	0	1	1	0	0	0	1	1	0	0	0	0	0	0	0	0
ARRDC3	0	0	0	0	0	0	1	1	1	0	0	0	0	0	0	0	0
ARSK	0	0	0	1	0	0	1	1	1	0	0	0	0	0	0	0	0
ASB13	0	0	0	0	0	0	0	0	0	0	1	1	0	0	0	0	0
ASB14	0	0	0	0	0	0	1	0	0	0	0	0	0	0	0	0	0
ASB8	1	0	0	1	0	0	0	1	1	0	0	1	0	0	0	0	0
ASCC2	0	0	0	0	0	0	0	1	0	0	0	0	0	0	0	0	0
ASCL5	0	0	0	1	0	0	0	1	1	0	0	0	0	0	0	0	0
ASF1A	0	0	0	1	0	0	1	1	1	0	0	0	0	0	0	0	0
ASIC1	0	0	0	0	0	0	0	1	0	0	0	0	0	0	0	0	0
ASIC2	0	0	0	0	0	0	0	1	0	0	0	0	0	0	0	0	0
ASPM	0	0	0	0	0	0	1	0	0	0	0	0	0	0	0	0	0
ASRGL1	0	0	0	0	0	0	1	1	0	0	0	0	0	0	0	0	0
ATAD1	0	0	0	0	0	0	1	0	0	0	0	0	0	0	0	0	0
ATAD2B	0	0	0	1	0	0	1	1	1	0	0	0	0	0	0	0	0
ATAD3A	1	0	1	0	0	0	0	0	0	0	0	0	0	0	0	0	1
ATAD3B	1	0	1	0	0	0	0	1	0	0	0	0	0	0	0	0	0
ATAD3C	0	0	0	0	0	0	0	1	0	0	0	0	0	0	0	0	0
ATC4	0	0	0	0	0	0	0	0	0	0	0	0	0	0	0	0	1
ATE1	0	0	0	0	0	0	1	0	0	0	0	0	0	0	0	0	0
ATF4	0	0	0	0	0	0	0	1	0	0	0	0	0	0	0	0	0
ATF6	0	0	0	1	0	0	0	1	1	0	0	0	0	0	0	0	0
ATF6B	1	0	1	0	0	0	0	1	0	1	0	0	0	0	0	0	0
ATF7IP	0	0	0	0	0	0	1	0	0	0	0	0	0	0	0	0	0
ATF7IP2	0	0	0	0	0	0	0	0	0	0	0	1	0	0	0	0	0
ATG10	0	0	0	0	0	0	1	0	0	0	0	0	0	0	0	0	0
ATG12	0	0	0	0	0	0	1	0	0	0	0	0	0	0	0	0	0
ATG16L1	1	1	0	1	1	0	0	1	1	0	1	1	0	0	0	0	0
ATG16L2	0	0	0	0	0	0	1	0	0	0	0	0	0	0	0	0	0
ATG2A	0	0	0	0	0	0	0	0	0	0	0	0	1	0	0	0	0
ATG4B	1	1	0	0	0	0	0	1	0	0	1	1	0	0	0	0	0
ATG4D	1	0	0	1	0	0	0	1	1	0	1	1	0	0	0	0	0
ATG5	0	0	0	0	1	0	0	1	0	0	0	0	0	0	0	0	0
ATG9A	0	0	0	1	0	0	1	1	1	0	0	0	0	0	0	0	0
ATL3	0	0	0	0	0	0	1	0	0	0	0	0	0	0	0	0	0
ATM	0	0	0	0	0	0	1	1	0	0	0	0	0	0	0	0	1
ATN1	0	0	0	1	0	0	0	1	1	0	0	0	0	0	0	0	0
ATOX1	0	0	0	0	0	0	1	1	0	0	0	0	0	0	0	0	0
ATP13A2	0	0	0	0	0	0	0	1	0	0	0	0	0	0	0	0	0
ATP13A4	0	0	0	0	0	0	1	0	0	0	0	0	0	0	0	0	0
ATP1A1	0	0	0	0	0	0	0	1	0	0	0	0	0	0	0	0	0
ATP1A4	0	0	0	1	0	0	1	1	1	0	0	0	0	0	0	0	0
ATP1B3	1	0	1	1	0	0	0	1	1	0	0	0	0	0	0	0	0
ATP1B3-AS1	1	0	0	0	0	0	0	1	1	0	0	0	0	0	0	0	0
ATP2A1	0	0	0	0	0	0	0	0	0	1	0	0	0	0	0	0	0
ATP2A2	0	0	0	0	0	0	1	0	0	0	0	0	0	0	0	0	0
ATP2A3	0	0	0	0	0	0	1	0	0	0	0	0	0	0	0	0	0
ATP2B1	0	0	0	0	0	0	1	0	0	0	0	0	0	0	0	0	0
ATP5D	1	0	1	1	0	0	1	1	1	0	1	1	0	0	0	0	0
ATP5E	0	0	0	0	0	0	0	1	1	0	0	0	0	0	0	0	0
ATP5F1P6	0	0	0	0	1	0	0	0	0	0	0	0	0	0	0	0	0
ATP5G1P1	0	0	0	0	0	0	0	1	0	0	0	0	0	0	0	0	0
ATP5G2	0	0	0	0	0	0	1	0	0	0	0	0	0	0	0	0	0
ATP5H	0	0	0	1	0	0	0	1	1	0	0	0	1	0	0	0	0
ATP5I	1	0	1	0	0	0	0	1	0	0	0	0	0	0	0	0	0
ATP6AP1	0	0	0	1	0	0	0	1	1	0	0	0	0	0	0	0	1
ATP6V0A1	1	0	1	1	0	0	1	1	1	0	0	0	0	0	0	0	0
ATP6V0A2	0	0	0	0	0	0	1	0	0	0	0	0	0	0	0	0	0
ATP6V0CP3	0	0	0	0	0	0	0	1	0	1	0	0	0	0	0	0	0
ATP6V0E1P3	0	0	0	0	0	0	1	0	0	0	0	0	0	0	0	0	0
ATP6V1B1	1	0	1	1	0	0	0	1	1	0	0	0	0	0	0	0	0
ATP6V1D	0	0	0	0	0	0	1	0	0	0	0	0	0	0	0	0	0
ATP6V1G1	0	0	0	0	0	0	1	0	0	0	0	0	0	0	0	0	0
ATP6V1G1P4	0	0	0	0	0	0	1	0	0	0	0	0	0	0	0	0	0
ATP6V1G2	1	0	1	1	0	0	1	1	1	0	0	0	0	0	1	0	0
ATP6V1G2-DDX39B	1	0	0	1	0	0	1	1	1	0	0	0	0	0	1	0	0
ATP6V1G3	1	0	0	1	0	0	1	1	1	0	1	1	0	0	0	0	0
ATP8B2	1	0	1	1	0	0	0	1	1	0	0	0	0	0	0	0	0
ATP9A	0	0	0	0	0	0	0	0	0	0	0	1	0	0	0	0	0
ATXN2	1	0	1	0	1	0	1	0	0	0	0	0	0	0	0	0	0
ATXN2L	1	0	1	1	0	0	0	1	1	0	0	0	0	0	0	0	0
ATXN7	0	0	0	0	0	0	1	0	0	0	0	0	0	0	0	0	0
AUH	1	0	0	1	0	0	0	1	1	0	1	0	0	0	0	0	0
AUP1	0	0	0	0	0	0	1	0	0	0	0	0	0	0	0	0	0
AURKA	0	0	0	0	0	0	0	1	0	0	0	0	0	0	0	0	0
AURKAIP1	1	1	1	0	0	0	0	0	0	0	0	0	0	0	0	0	0
AVIL	0	0	0	1	0	0	1	1	1	0	0	0	0	0	0	0	0
AVPI1	0	0	0	0	0	0	1	1	0	0	0	0	0	0	0	0	0
AZI2	1	0	0	1	0	0	1	1	1	0	0	0	0	0	0	0	0
AZU1P1	0	0	0	0	0	0	0	1	1	0	0	0	0	0	0	0	0
B2M	0	0	0	0	0	0	0	0	0	0	0	0	0	0	0	0	1
B3GALT4	0	0	0	0	0	0	1	0	0	0	0	0	0	0	0	0	0
B3GALT6	1	1	1	0	0	0	1	1	0	1	1	1	0	0	0	0	0
B3GNT2	1	0	1	1	1	0	1	1	1	0	0	1	0	0	0	0	0
B4GALNT1	0	0	0	1	0	0	1	1	1	0	0	0	0	0	0	0	0
B4GALT4	0	0	0	1	0	0	0	1	1	0	0	0	0	0	0	0	0
B4GALT5	1	0	1	1	0	0	0	1	1	0	0	0	0	0	0	0	0
B4GALT7	1	0	1	1	0	0	1	1	1	0	0	0	0	0	0	0	0
BACH2	1	1	1	1	1	0	1	1	1	1	1	1	0	0	0	0	1
BAD	1	1	1	0	0	0	1	1	0	0	0	0	0	0	0	0	0
BAG6	1	0	1	1	0	0	0	1	1	0	0	0	0	0	0	0	0
BAK1	1	0	1	0	0	0	0	0	0	0	0	0	0	0	0	0	0
BANF1	1	0	1	1	0	0	0	1	1	0	0	0	0	0	0	0	0
BANF1P3	0	0	0	0	0	0	0	0	0	1	0	0	0	0	0	0	0
BANK1	1	0	0	0	1	0	0	0	0	0	0	0	0	0	0	0	0
BATF	0	0	0	1	1	0	0	1	1	0	1	1	0	0	0	0	0
BAX	1	0	1	0	0	0	0	1	0	0	0	0	0	0	0	0	0
BAZ1A	1	0	1	1	0	0	1	1	1	0	0	0	0	0	0	0	0
BAZ2A	0	0	0	0	0	0	1	1	0	0	0	0	0	0	0	0	0
BBIP1	0	0	0	0	0	0	0	1	0	0	0	0	0	0	0	0	0
BBS12	0	0	0	1	0	0	0	1	1	0	0	0	0	0	0	0	0
BBS7	1	0	1	0	0	0	0	0	0	0	0	1	0	0	0	0	0
BCAP31	0	0	0	0	0	0	0	1	0	0	0	0	0	0	0	0	0
BCAR1	0	0	0	0	0	0	0	0	0	1	0	0	0	0	0	0	0
BCAR4	0	0	0	0	0	0	1	0	0	0	0	0	0	0	0	0	0
BCAS1	0	0	0	0	0	0	0	1	0	0	0	0	0	0	0	0	0
BCAT2	1	0	1	0	0	0	0	1	0	0	1	1	0	0	0	0	0
BCCIP	0	0	0	1	0	0	1	1	1	0	0	0	0	0	0	0	0
BCDIN3D	0	0	0	0	0	0	0	1	0	0	0	0	0	0	0	0	0
BCKDK	1	0	1	0	0	0	0	1	0	0	0	0	0	0	0	0	0
BCL10	0	0	0	0	0	0	0	0	0	0	0	0	0	0	0	0	1
BCL11B	1	0	1	0	0	0	0	1	0	0	0	0	0	0	0	0	1
BCL2L1	0	0	0	0	0	0	1	0	0	0	0	0	0	0	0	0	0
BCL2L11	1	0	1	1	0	1	1	1	1	1	0	0	0	0	0	0	0
BCL2L12	0	1	0	0	0	0	1	0	0	0	0	0	0	0	0	0	0
BCL2L15	0	0	0	1	0	0	0	1	1	0	0	0	0	0	0	0	0
BCL6	1	0	1	1	0	0	0	1	1	0	0	0	0	0	1	0	0
BCL7C	1	0	1	0	0	0	0	0	0	0	1	1	0	0	0	0	0
BCL9L	1	1	1	1	0	0	1	1	1	0	1	1	0	0	0	0	0
BCLAF1	0	0	0	1	0	0	0	1	1	0	0	0	0	0	0	0	0
BCS1L	1	0	1	1	0	0	1	1	1	0	1	1	0	0	0	0	0
BDH2	1	0	1	1	0	0	0	1	1	0	0	0	0	0	0	0	0
BEST1	1	0	0	1	0	0	1	1	1	0	0	0	0	0	0	0	0
BHLHE40	0	0	0	0	0	0	1	0	0	0	0	0	0	0	0	0	0
BHLHE40-AS1	0	0	0	0	0	0	1	0	0	0	0	0	0	0	0	0	0
BIRC2	0	0	0	0	0	0	1	0	0	0	0	0	0	0	0	0	0
BIRC3	0	0	0	0	0	0	1	0	0	0	0	0	0	0	0	0	0
BIRC8	0	0	0	1	0	0	0	1	1	0	0	0	0	0	0	0	0
BLK	0	1	0	1	1	0	1	1	1	1	1	1	0	0	0	0	0
BLM	1	0	1	1	0	0	0	1	1	0	0	0	0	0	0	0	1
BLNK	0	0	0	0	0	0	0	0	0	0	0	0	0	0	0	0	1
BLOC1S1	0	0	0	0	0	0	1	0	0	0	0	0	0	0	0	0	0
BLOC1S6	0	0	0	0	0	0	1	0	0	0	0	0	0	0	0	0	0
BMF	0	0	0	0	0	0	1	0	0	0	0	0	0	0	0	0	0
BMS1P21	0	0	0	0	0	0	0	0	0	0	0	1	0	0	0	0	0
BNIP3	0	0	0	0	0	0	1	1	1	0	0	0	0	0	0	0	0
BOK	0	0	0	0	1	0	0	1	0	1	0	0	0	0	0	0	0
BOK-AS1	0	0	0	0	0	0	0	1	0	0	0	0	0	0	0	0	0
BOLA1	0	0	0	1	0	0	0	1	1	0	0	0	1	0	0	0	0
BOLL	1	0	0	1	0	0	0	1	1	1	0	0	0	0	0	0	0
BOP1	0	0	0	0	0	0	1	0	0	0	0	0	0	0	0	0	0
BPGM	0	0	0	0	0	0	1	0	0	0	0	0	0	0	0	0	0
BRAP	0	0	0	0	0	0	1	0	0	0	0	0	0	0	0	0	0
BRAT1	0	0	0	0	0	0	0	1	0	0	0	1	0	0	0	0	0
BRCA1	0	0	0	0	0	0	0	0	0	1	0	0	0	0	0	0	1
BRCA2	0	0	0	0	0	0	0	0	0	0	0	0	0	0	0	0	1
BRD2	0	0	0	1	0	0	1	1	1	1	0	0	0	0	0	0	0
BRD2-IT1	0	0	0	0	0	0	1	1	1	0	0	0	0	0	0	0	0
BRD7	0	0	0	1	0	1	0	1	1	1	1	1	0	0	0	0	0
BRD9	0	0	0	0	0	0	1	0	0	0	0	0	0	0	0	0	0
BRDT	0	0	0	1	0	0	0	1	1	0	0	0	0	0	0	0	0
BRF1	0	0	0	1	0	0	0	1	1	0	0	0	0	0	0	0	0
BRI3	0	0	0	0	0	0	1	0	0	0	0	0	0	0	0	0	0
BRIP1	0	0	0	0	0	0	0	0	0	0	0	0	0	0	0	0	1
BRIX1	1	0	1	1	0	0	1	1	1	0	0	0	0	0	0	0	0
BRMS1	0	0	0	0	0	0	1	0	0	0	0	0	0	0	0	0	0
BRMS1L	1	0	1	0	0	0	1	1	0	0	0	0	0	0	0	0	0
BRPF1	0	0	0	0	0	0	1	0	0	0	0	0	0	0	0	0	0
BSCL2	0	0	0	0	0	0	1	0	0	0	0	0	0	0	0	0	0
BSN	0	0	0	1	0	0	0	1	1	0	0	0	0	0	0	0	0
BSN-AS2	0	0	0	0	0	0	0	1	1	0	0	0	0	0	0	0	0
BTBD19	0	0	0	0	0	0	1	0	0	0	0	0	0	0	0	0	0
BTBD2	0	0	0	0	0	0	1	0	0	0	0	0	0	0	0	0	0
BTBD6	0	0	0	0	0	0	0	1	1	0	0	0	0	0	0	0	0
BTBD7	0	0	0	1	0	0	1	1	1	0	0	0	0	0	0	0	0
BTBD8	0	0	0	1	0	0	0	1	1	0	0	0	0	0	0	0	0
BTF3P12	0	0	0	0	1	0	0	0	0	0	0	0	0	0	0	0	0
BTK	0	0	0	0	0	0	0	0	0	0	0	0	0	0	0	0	1
BTLA	0	0	0	0	0	0	1	0	0	0	0	0	0	0	0	0	0
BTNL2	1	0	0	0	0	0	0	0	0	1	0	0	0	0	0	0	0
BUB1B	0	0	0	0	0	0	1	0	0	0	0	0	0	0	0	0	0
BUB3	0	0	0	0	0	0	1	1	0	0	0	0	0	0	0	0	0
BX936347.1	0	0	0	0	0	0	0	1	1	0	0	0	0	0	0	0	0
BYSL	1	0	1	1	0	0	1	1	1	1	1	1	0	0	0	0	0
BZW1	0	0	0	0	0	0	0	1	0	0	0	0	0	0	0	0	0
BZW2	0	0	0	0	0	0	1	0	0	0	0	0	0	0	0	0	0
C10orf107	0	0	0	0	0	0	1	0	0	0	0	0	0	0	0	0	0
C10orf137	0	0	0	0	0	0	1	0	0	0	0	0	0	0	0	0	0
C10orf25	0	0	0	0	0	0	1	0	0	0	0	0	0	0	0	0	0
C10orf54	0	0	0	0	0	0	1	0	0	0	0	0	0	0	0	0	0
C10orf55	1	1	0	1	0	0	0	1	1	0	1	1	0	0	0	0	0
C10orf88	1	0	1	0	0	0	1	0	0	0	0	0	0	0	0	0	0
C10orf95	1	0	0	0	0	0	0	0	0	0	0	0	0	0	0	0	0
C11orf1	1	0	1	1	0	0	0	1	1	0	0	0	0	0	0	0	0
C11orf45	0	0	0	0	0	0	1	0	0	0	0	0	0	0	0	0	0
C11orf48	0	0	0	1	0	0	0	1	1	0	0	0	0	0	0	0	0
C11orf52	0	0	0	1	0	0	0	1	1	0	0	0	0	0	0	0	0
C11orf57	0	0	0	0	0	0	0	1	1	0	0	0	0	0	0	0	0
C11orf65	0	0	0	0	0	0	0	1	0	0	0	0	0	0	0	0	0
C11orf68	1	0	1	0	0	0	0	0	0	0	0	0	0	0	0	0	0
C11orf73	0	0	0	0	0	0	1	0	0	0	0	0	0	0	0	0	0
C11orf74	0	0	0	0	0	0	0	1	0	0	0	0	0	0	0	0	0
C11orf83	0	0	0	1	0	0	0	1	1	0	0	0	0	0	0	0	0
C11orf89	1	0	0	0	0	0	0	0	0	0	0	0	0	0	0	0	0
C11orf91	0	0	0	0	0	0	1	0	0	0	0	0	0	0	0	0	0
C12orf4	0	0	0	0	0	0	1	0	0	0	0	0	0	0	0	0	0
C12orf57	0	0	0	1	0	0	1	1	1	0	0	0	0	0	0	0	0
C12orf65	1	0	0	1	0	0	0	1	1	0	1	1	0	0	0	0	0
C12orf68	1	0	0	1	0	0	0	1	1	0	0	0	0	0	0	0	0
C14orf1	1	0	1	1	0	0	1	1	1	0	0	0	0	0	0	0	0
C14orf28	0	0	0	0	0	0	0	1	0	0	0	0	0	0	0	0	0
C14orf37	0	0	0	0	0	0	1	1	0	0	0	0	0	0	0	0	0
C14orf39	0	0	0	0	0	0	0	0	0	0	1	0	0	0	0	0	0
C14orf64	0	0	0	0	1	0	0	0	0	0	0	0	0	0	0	0	0
C14orf80	0	0	0	0	0	0	0	1	0	0	0	0	0	0	0	0	0
C15orf37	0	0	0	0	0	0	1	0	0	0	0	0	0	0	0	0	0
C15ORF37	0	0	0	0	0	0	1	0	0	0	0	0	0	0	0	0	0
C15orf39	1	0	1	0	0	0	0	0	0	0	1	1	0	0	0	0	0
C15orf53	1	0	0	1	0	0	1	1	1	0	0	0	0	0	0	0	0
C16orf58	0	0	0	1	0	0	0	1	1	0	0	0	0	0	0	0	0
C16orf93	0	0	0	0	0	0	0	1	1	0	0	0	0	0	0	0	0
C16orf98	0	0	0	1	0	0	0	1	1	0	0	0	0	0	0	0	0
C17orf107	1	0	1	1	0	0	0	1	1	0	0	0	0	0	0	0	0
C17orf67	0	1	0	1	1	0	0	1	1	0	0	0	0	0	0	0	0
C17orf99	1	0	0	0	0	0	0	1	1	0	0	0	0	0	0	0	0
C18orf32	0	0	0	0	0	0	0	1	0	0	0	0	0	0	0	0	0
C18orf54	0	0	0	1	0	0	0	1	1	0	0	0	0	0	0	0	0
C19orf24	1	0	1	0	0	0	1	0	0	1	0	1	1	0	0	0	0
C19orf26	1	0	0	1	0	0	1	1	1	0	0	0	0	0	0	0	0
C19orf35	0	0	0	0	0	0	1	0	0	0	0	0	0	0	0	0	0
C19orf38	0	0	0	0	0	0	0	1	0	0	1	1	0	0	0	0	0
C19orf47	0	0	0	0	0	0	1	0	0	0	0	0	0	0	0	0	0
C19orf54	0	0	0	0	0	0	1	0	0	0	0	0	0	0	0	0	0
C19orf66	0	0	0	0	0	0	0	1	0	0	0	0	0	0	0	0	0
C19orf68	0	0	0	0	0	0	0	0	0	1	0	0	0	0	0	0	0
C19orf73	0	0	0	0	0	0	1	0	0	1	0	0	0	0	0	0	0
C19orf81	0	0	0	1	0	0	0	1	1	0	0	0	0	0	0	0	0
C1D	0	0	0	0	0	0	1	0	0	0	0	0	0	0	0	0	0
C1orf105	0	0	0	0	0	0	0	1	0	0	0	0	0	0	1	0	0
C1orf106	0	0	0	0	1	0	0	0	0	0	0	0	0	0	0	0	0
C1orf109	0	0	0	1	0	0	1	1	1	0	0	0	0	0	0	0	0
C1orf122	0	0	0	0	1	0	0	1	0	0	0	0	0	0	0	0	0
C1orf132	0	0	0	0	0	0	0	1	1	0	0	0	0	0	0	0	0
C1orf141	0	0	0	1	0	0	0	1	1	0	0	0	0	0	0	0	0
C1orf146	0	0	0	1	0	0	0	1	1	0	0	0	0	0	0	0	0
C1orf159	1	0	1	1	0	0	1	1	1	0	1	1	0	0	1	0	0
C1orf170	1	0	1	1	0	0	1	1	1	0	0	0	0	0	0	0	0
C1orf174	0	0	0	0	0	0	0	1	0	0	0	0	0	0	0	0	0
C1orf192	1	0	0	1	0	0	0	1	1	0	0	0	0	0	0	0	0
C1orf204	0	0	0	0	0	0	0	0	0	0	0	1	0	0	0	0	0
C1orf27	0	0	0	0	0	0	0	1	0	0	0	0	0	0	0	0	0
C1orf43	0	0	0	0	0	0	1	0	0	0	0	0	0	0	0	0	0
C1orf51	0	0	0	0	0	0	0	1	0	0	0	0	0	0	0	0	0
C1orf52	0	0	0	1	0	0	0	1	1	0	0	0	0	0	0	0	0
C1orf53	0	0	0	0	0	0	0	1	0	0	0	0	0	0	1	0	0
C1orf54	1	0	1	0	0	0	0	0	0	0	0	0	0	0	0	0	0
C1orf74	1	0	1	1	0	0	0	1	1	0	0	0	0	0	0	0	0
C1orf86	1	0	1	0	0	0	1	1	0	0	0	0	0	0	1	0	0
C1QA	0	0	0	0	0	0	0	0	0	0	0	0	0	0	0	0	1
C1QB	0	0	0	0	0	0	0	1	0	0	0	0	0	0	0	0	1
C1QC	0	0	0	0	0	0	0	0	0	0	0	0	0	0	0	0	1
C1QTNF3	0	0	0	0	0	0	0	0	0	0	1	0	0	0	0	0	0
C1QTNF5	0	0	0	0	0	0	0	1	0	0	0	0	0	0	0	0	0
C1QTNF6	1	1	1	1	1	1	0	1	1	1	1	1	0	0	0	0	0
C1R	0	0	0	0	0	0	0	0	0	0	0	0	0	0	0	0	1
C1RL	0	0	0	0	0	0	1	0	0	0	0	0	0	0	0	0	0
C1RL-AS1	0	0	0	0	0	0	1	0	0	0	0	0	0	0	0	0	0
C1S	0	0	0	0	0	0	0	0	0	0	0	0	0	0	0	0	1
C2	1	0	0	1	0	0	0	1	1	0	0	0	0	0	0	0	1
C20orf112	1	0	1	0	0	0	0	0	0	1	0	0	0	0	0	0	0
C20ORF135	1	0	0	1	0	0	0	1	1	0	0	0	0	0	0	0	0
C20orf195	1	0	0	1	0	0	0	1	1	0	0	0	0	0	0	0	0
C20orf201	1	0	0	0	0	0	0	0	0	0	0	0	0	0	0	0	0
C20orf203	1	0	0	0	0	0	0	0	0	0	0	0	0	0	0	0	0
C21orf119	0	0	0	0	0	0	1	0	0	0	0	0	0	0	0	0	0
C21orf33	1	0	0	0	0	0	0	1	0	0	0	0	0	0	0	0	0
C21orf49	1	0	1	1	0	0	1	1	1	0	0	0	0	0	0	0	0
C21orf54	1	0	0	1	0	0	0	1	1	0	0	0	0	0	0	0	0
C21orf59	0	0	0	0	0	0	1	0	0	1	0	0	0	0	0	0	0
C21orf62	0	0	0	1	0	0	1	1	1	0	0	0	0	0	0	0	0
C2CD2L	1	0	1	1	0	0	1	1	1	0	0	0	0	0	0	0	0
C2CD4D	0	0	0	0	0	0	0	1	0	0	0	0	0	0	0	0	0
C2orf16	0	0	0	0	0	0	0	1	0	0	0	0	0	0	0	0	0
C2orf43	0	0	0	0	0	0	1	0	0	0	0	0	0	0	0	0	0
C2orf44	0	0	0	1	0	0	0	1	1	0	0	0	0	0	0	0	0
C2orf54	0	0	0	0	0	0	0	1	1	0	0	0	0	0	0	0	0
C2orf62	1	0	0	1	0	0	0	1	1	0	0	0	0	0	0	0	0
C2ORF69	0	0	0	0	0	0	0	0	0	0	0	0	0	0	0	0	1
C2orf74	0	0	0	1	0	1	1	1	1	0	0	0	0	0	0	0	0
C2orf82	1	0	0	1	0	0	0	1	1	1	0	0	0	0	0	0	0
C3	1	0	0	0	0	0	0	0	0	0	0	0	0	0	0	0	1
C3orf30	0	0	0	1	0	0	0	1	1	0	0	0	0	0	0	0	0
C3orf38	0	0	0	0	0	0	1	0	0	0	0	0	0	0	0	0	0
C4A	0	0	0	0	0	0	0	0	0	1	0	0	0	0	0	0	1
C4B	0	0	0	0	0	0	0	1	1	0	0	0	0	0	0	0	1
C4B-AS1	0	0	0	0	0	0	0	1	1	0	0	0	0	0	0	0	0
C5	0	0	0	0	0	0	1	0	0	1	0	0	0	0	0	0	1
C5orf22	0	0	0	0	0	0	1	0	0	0	0	0	0	0	0	0	0
C5orf24	0	0	0	1	0	0	1	1	1	0	0	0	0	0	0	0	0
C5orf28	0	0	0	0	0	0	1	0	0	0	0	0	0	0	0	0	0
C5orf30	0	0	0	0	1	0	1	0	0	1	0	0	0	0	0	0	0
C5orf34	0	0	0	0	0	0	1	0	0	0	0	0	0	0	0	0	0
C5orf49	0	0	0	0	0	0	0	1	0	0	0	0	0	0	0	0	0
C5orf56	1	0	0	1	0	0	0	1	1	0	1	0	0	0	0	0	0
C6	0	0	0	0	0	0	0	0	0	0	0	0	0	0	0	0	1
C6orf1	0	0	0	0	0	0	0	1	0	0	0	0	0	0	0	0	0
C6orf10	1	0	0	0	0	0	0	0	0	0	0	0	0	0	0	0	0
C6orf106	0	0	0	0	0	1	0	0	0	0	0	0	0	0	0	0	0
C6orf132	0	0	0	0	0	0	0	0	0	0	1	0	0	0	0	0	0
C6orf203	0	0	0	0	0	0	0	1	0	1	0	0	0	0	0	0	0
C6orf211	0	0	0	0	0	0	0	1	0	0	0	0	0	0	0	0	0
C6orf25	0	0	0	0	0	0	0	1	0	0	0	0	0	0	0	0	0
C6orf3	0	0	0	0	1	0	0	1	1	0	0	0	0	0	0	0	0
C6orf47	1	0	0	1	0	0	1	1	1	0	0	0	0	0	0	0	0
C6orf47-AS1	1	0	0	0	0	0	0	1	1	0	0	0	0	0	0	0	0
C6orf48	1	0	0	1	0	0	1	1	1	0	0	0	0	0	0	0	0
C6orf62	0	0	0	0	0	0	1	1	0	0	0	0	0	0	0	0	0
C6orf99	0	0	0	1	0	0	0	1	1	0	0	0	0	0	0	0	0
C7	0	0	0	0	0	0	0	0	0	0	0	0	0	0	0	0	1
C7orf10	0	0	0	0	0	0	1	0	0	0	0	0	0	0	0	0	0
C7orf31	0	0	0	0	0	0	1	0	0	0	0	0	0	0	0	0	0
C7orf33	0	0	0	1	0	0	0	1	1	0	0	0	0	0	0	0	0
C7orf65	0	0	0	0	0	0	0	1	0	0	0	0	0	0	0	0	0
C7orf72	1	0	0	1	0	0	1	1	1	0	0	0	0	0	0	0	0
C8A	0	0	0	0	0	0	0	0	0	0	0	0	0	0	0	0	1
C8B	0	0	0	0	0	0	0	0	0	0	0	0	0	0	0	0	1
C8G	0	0	0	0	0	0	0	0	0	0	0	0	0	0	0	0	1
C8orf12	0	0	0	0	0	0	0	1	0	0	0	0	0	0	0	0	0
C8orf49	0	0	0	0	0	0	1	1	1	0	0	0	0	0	0	0	0
C8orf74	0	0	0	0	0	0	0	1	0	0	0	0	0	0	0	0	0
C9	0	0	0	0	0	0	0	1	0	0	0	0	0	0	0	0	1
C9orf114	1	0	1	0	0	0	0	0	0	0	0	0	0	0	0	0	0
C9orf156	0	0	0	0	0	0	1	0	0	0	0	0	0	0	0	0	0
C9orf163	0	0	0	0	0	0	0	1	0	0	0	0	0	0	0	0	0
C9orf173	0	0	0	1	0	0	0	1	1	0	0	0	0	0	0	0	0
C9orf72	0	0	0	1	0	0	0	1	1	0	0	0	0	0	0	0	0
C9orf89	0	0	0	0	0	0	1	0	0	0	0	0	0	0	0	0	0
CA11	1	1	1	0	0	0	0	1	1	0	0	1	0	0	0	0	0
CA14	1	0	0	0	0	0	0	1	0	0	0	0	0	0	0	0	0
CAAP1	0	0	0	0	0	0	0	1	1	0	0	0	0	0	0	0	0
CAB39	1	0	1	1	0	0	0	1	1	0	0	0	0	0	0	0	0
CABP7	0	0	0	0	0	0	0	1	0	0	0	0	0	0	0	0	0
CACNA1F	0	0	0	0	0	0	0	0	0	1	0	0	0	0	0	0	0
CACNA1S	0	0	0	1	0	0	0	1	1	0	0	0	0	0	0	0	0
CACNB3	0	0	0	0	0	0	1	0	0	0	0	0	0	0	0	0	0
CACNG3	0	0	0	0	0	0	0	1	1	0	0	0	0	0	0	0	0
CACNG8	0	0	0	0	0	0	0	1	1	0	0	0	0	0	0	0	0
CACUL1	0	0	0	0	0	0	1	0	0	0	0	0	0	0	0	0	0
CACYBP	0	0	0	0	0	0	1	0	0	0	0	0	0	0	0	0	0
CACYBPP3	0	0	0	0	0	0	0	0	0	1	0	0	0	0	0	0	0
CAGE1	0	0	0	0	0	0	1	0	0	0	0	0	0	0	0	0	0
CAHM	0	0	0	0	0	0	1	1	0	0	0	0	0	0	0	0	0
CALM3	0	0	0	1	0	0	0	1	1	0	0	0	0	0	0	0	0
CALR	0	0	0	0	0	0	1	0	0	0	0	0	0	0	0	0	0
CAMK1G	0	0	0	0	0	0	0	1	1	0	0	0	0	0	0	0	0
CAMK2A	0	0	0	0	1	0	0	0	0	0	0	0	0	0	0	0	0
CAMK2G	1	1	1	1	0	0	0	1	1	1	1	1	0	0	1	0	0
CAMK2N1	0	0	0	0	0	0	0	1	1	0	0	0	0	0	0	0	0
CAMK4	0	0	0	0	0	0	1	0	0	0	0	0	0	0	0	0	0
CAMKV	0	0	0	0	0	0	0	1	0	0	0	0	0	0	0	0	0
CAMSAP2	0	0	0	0	1	0	0	0	0	0	0	0	0	0	0	0	0
CAMTA2	0	0	0	0	0	0	0	1	0	0	0	0	0	0	0	0	0
CAND1	0	0	0	1	0	0	0	1	1	0	0	0	0	0	0	0	0
CANX	0	0	0	0	0	0	1	0	0	0	0	0	0	0	0	0	0
CAPN14	0	0	0	0	0	0	1	0	0	0	0	0	0	0	0	0	0
CAPSL	0	0	0	0	0	1	0	1	0	0	0	0	0	0	0	0	0
CAPZA1	0	0	0	0	0	0	1	0	0	0	0	0	0	0	0	0	0
CARD10	0	0	0	1	0	0	1	1	1	0	0	0	0	0	0	0	0
CARD11	0	0	0	0	0	0	0	0	0	0	0	0	0	0	0	0	1
CARD14	0	0	0	0	0	0	0	0	0	0	0	0	0	0	0	0	1
CARD6	0	0	0	1	0	0	1	1	1	0	0	0	0	0	0	0	0
CARD8	0	0	0	0	0	0	0	1	1	0	0	0	0	0	0	0	0
CARD9	1	0	0	0	1	0	0	1	0	0	0	0	0	0	0	0	1
CARF	0	0	0	0	0	0	1	1	0	0	1	0	0	0	0	0	0
CARMIL2	0	0	0	0	0	0	0	0	0	0	0	0	0	0	0	0	1
CASC11	1	0	0	0	0	0	1	1	1	0	0	0	0	0	1	0	0
CASC19	0	0	0	0	0	0	0	0	0	0	0	1	0	0	0	0	0
CASC3	0	0	0	0	0	1	0	0	0	0	0	0	0	0	0	0	0
CASKIN2	1	0	0	1	0	0	0	1	1	0	0	0	0	0	0	0	0
CASP10	0	0	0	1	0	0	0	1	1	0	0	0	0	0	0	0	1
CASP7	0	1	0	0	1	1	1	0	0	1	0	0	0	0	0	0	0
CASP8	1	0	0	1	0	0	0	1	1	0	0	0	0	0	0	0	1
CASP8AP2	1	0	1	0	0	0	1	0	0	0	0	0	0	0	0	0	0
CAST	1	0	0	0	0	1	1	0	0	1	0	0	0	0	0	0	0
CATIP	0	0	0	0	0	0	0	0	0	0	1	1	0	0	0	0	0
CATIP-AS1	0	0	0	0	0	0	0	0	0	0	1	1	0	0	0	0	0
CATSPER1	1	0	0	0	0	0	0	1	0	0	0	0	0	0	0	0	0
CBFA2T3	0	0	0	0	1	0	0	1	0	0	0	0	0	0	0	0	0
CBL	0	0	0	0	0	0	0	1	0	0	0	0	0	0	0	0	0
CBLL1	0	0	0	1	0	0	0	1	1	0	0	0	0	0	0	0	0
CBR1	0	0	0	0	0	0	0	0	0	0	1	0	0	0	0	0	0
CBX3	0	0	0	0	0	0	1	1	0	0	0	0	0	0	0	0	0
CBX3P4	0	0	0	0	0	0	1	0	0	0	0	0	0	0	0	0	0
CBX5	0	0	0	0	0	0	1	0	0	0	0	0	0	0	0	0	0
CBX6	1	0	1	1	0	0	0	1	1	0	0	0	0	0	0	0	0
CBX7	1	0	1	1	0	0	0	1	1	0	0	0	0	0	0	0	0
CCAT1	1	0	0	0	0	0	0	0	0	0	0	0	0	0	0	0	0
CCBE1	0	0	0	0	0	0	0	0	0	0	0	0	0	0	0	0	1
CCBL1	0	0	0	0	1	0	0	0	0	0	0	0	0	0	0	0	0
CCDC101	1	1	0	1	0	1	0	1	1	1	0	0	0	0	0	0	0
CCDC102B	0	0	0	1	0	0	0	1	1	0	0	0	0	0	0	0	0
CCDC104	1	0	0	0	0	0	0	1	1	0	0	0	0	0	0	0	0
CCDC114	1	0	1	1	0	0	0	1	1	0	0	0	0	0	0	0	0
CCDC115	0	0	0	0	0	0	1	0	0	0	0	0	0	0	0	0	0
CCDC116	1	0	0	0	0	0	0	1	0	1	1	0	0	0	0	0	0
CCDC121	1	0	0	0	0	0	1	1	0	0	0	0	0	0	0	0	0
CCDC122	0	1	0	0	0	1	0	0	0	1	0	0	0	0	0	0	0
CCDC124	0	0	0	1	0	0	0	1	1	0	0	0	0	0	0	0	0
CCDC126	0	0	0	0	0	0	1	0	0	0	0	0	0	0	0	0	0
CCDC132	0	0	0	1	0	0	1	1	1	0	0	0	0	0	0	0	0
CCDC153	0	0	0	0	0	0	0	1	0	0	0	0	0	0	0	0	0
CCDC155	1	0	0	0	0	0	0	1	1	1	0	0	0	0	0	0	0
CCDC158	0	0	0	0	0	0	0	1	0	0	0	0	0	0	0	0	0
CCDC184	0	0	0	0	0	0	0	0	0	0	0	1	0	0	0	0	0
CCDC26	1	0	0	0	1	0	0	0	0	0	0	0	0	0	0	0	0
CCDC58	0	0	0	0	0	0	0	1	0	0	0	0	0	0	0	0	0
CCDC6	0	0	0	0	0	0	1	0	0	0	0	0	0	0	0	0	0
CCDC62	0	0	0	0	0	0	0	1	0	0	0	0	0	0	0	0	0
CCDC64	0	0	0	0	0	0	1	0	0	0	0	0	0	0	0	0	0
CCDC66	0	0	0	1	0	0	0	1	1	0	0	0	0	0	0	0	0
CCDC68	0	0	0	1	0	0	0	1	1	0	0	0	0	0	0	0	0
CCDC69	0	0	0	1	0	0	0	1	1	0	0	0	0	0	0	0	0
CCDC7	0	0	0	0	0	0	1	0	0	0	0	0	0	0	0	0	0
CCDC84	0	0	0	1	0	0	0	1	1	0	1	1	0	0	0	0	0
CCDC85B	1	0	1	0	0	0	0	0	0	0	1	1	0	0	0	0	0
CCDC86	1	0	1	1	0	0	1	1	1	0	1	1	0	0	0	0	0
CCDC88A	0	0	0	0	0	0	0	1	0	0	0	0	0	0	0	0	0
CCDC88B	1	1	1	0	0	0	0	1	0	0	0	0	0	0	0	0	0
CCDC93	0	0	0	0	0	0	1	0	0	0	0	0	0	0	0	0	0
CCHCR1	1	0	1	1	0	0	0	1	1	1	0	0	0	0	0	0	0
CCL1	1	0	0	1	0	0	0	1	1	0	0	0	0	0	0	0	0
CCL11	0	0	0	0	0	0	0	1	0	0	0	0	0	0	0	0	0
CCL13	1	0	0	0	0	0	1	0	0	0	0	0	0	0	0	0	0
CCL17	0	0	0	0	0	0	0	1	0	0	0	0	0	0	0	0	0
CCL2	0	0	0	0	0	0	0	1	0	0	0	0	0	0	0	0	0
CCL20	0	0	0	0	0	0	0	0	0	1	1	1	0	0	0	1	0
CCL21	0	0	0	0	1	0	0	0	0	0	0	0	0	0	0	0	0
CCL22	0	0	0	0	1	0	0	1	0	0	0	0	0	0	0	0	0
CCL7	0	0	0	0	1	0	0	1	0	0	0	0	0	0	0	0	0
CCL8	0	0	0	0	0	0	0	1	0	0	0	0	0	0	0	0	0
CCNA2	0	0	0	1	0	0	1	1	1	0	0	0	0	0	0	0	0
CCNB1IP1	0	0	0	0	0	0	1	0	0	0	0	0	0	0	0	0	0
CCND2	0	0	0	0	0	0	1	0	0	0	0	0	0	0	0	0	0
CCND3	1	1	1	1	1	0	0	1	1	0	1	1	0	0	0	0	0
CCNG1	0	0	0	1	0	0	0	1	1	0	0	0	0	0	0	0	0
CCNI2	0	0	0	0	0	0	0	1	0	0	0	0	0	0	0	0	0
CCNJL	0	0	0	0	0	0	0	1	1	0	0	0	0	0	0	0	0
CCNK	0	0	0	0	0	0	0	1	0	0	0	0	0	0	0	0	0
CCNL2	1	0	0	0	0	0	0	0	0	0	0	0	0	0	0	0	0
CCNO	0	0	0	0	0	0	1	0	0	0	0	0	0	0	0	0	0
CCNT2	1	0	0	0	0	0	0	1	0	0	0	0	0	0	0	0	0
CCNT2-AS1	0	0	0	0	0	0	0	1	0	0	0	0	0	0	0	0	0
CCNY	1	0	0	1	0	0	1	1	1	0	1	1	0	0	0	0	0
CCR1	0	0	0	0	1	0	0	1	0	0	0	1	0	0	0	0	0
CCR12P	0	0	0	0	1	0	0	0	0	0	0	0	0	0	0	0	0
CCR2	1	0	0	0	0	0	0	1	0	1	0	1	0	0	0	0	0
CCR3	0	0	0	0	0	0	0	0	0	0	0	0	0	0	1	0	0
CCR4	1	0	1	0	1	0	0	0	0	0	1	1	0	0	1	0	0
CCR5	1	0	0	0	0	0	0	1	0	0	0	0	0	0	0	0	0
CCR6	1	0	0	1	1	0	1	1	1	1	1	0	0	0	0	1	0
CCR7	1	0	0	1	0	0	1	1	1	0	1	1	0	0	0	0	0
CCRL2	0	0	0	0	1	0	0	1	0	0	0	0	0	0	0	0	0
CCSER2	0	0	0	1	0	0	1	1	1	0	0	0	0	0	0	0	0
CCT4	1	0	1	1	0	0	1	1	1	0	0	0	0	0	0	0	0
CCT5	1	0	1	1	0	0	1	1	1	0	0	0	0	0	0	0	0
CCT7	0	0	0	0	0	0	1	1	1	0	0	0	0	0	0	0	0
CD101	0	0	0	1	0	0	0	1	1	0	0	0	0	0	0	0	0
CD109	0	0	0	0	0	0	1	0	0	0	0	0	0	0	0	0	0
CD164	0	0	0	0	0	0	1	0	0	0	0	0	0	0	0	0	0
CD19	0	0	0	0	0	0	0	1	0	0	0	0	0	0	0	0	1
CD2	0	0	0	1	0	0	0	1	1	0	0	0	0	0	0	0	0
CD20	0	0	0	0	0	0	0	0	0	0	0	0	0	0	0	0	1
CD207	1	0	0	0	0	0	0	1	0	1	0	0	0	0	0	0	0
CD21	0	0	0	0	0	0	0	0	0	0	0	0	0	0	0	0	1
CD226	1	0	1	1	1	0	0	1	1	0	0	0	0	0	0	0	0
CD244	1	1	0	0	0	0	0	1	0	1	1	1	0	0	1	0	0
CD247	1	0	1	1	1	0	1	1	1	1	0	0	0	0	0	0	0
CD27	1	1	1	1	0	0	1	1	1	0	1	1	0	0	0	0	1
CD27-AS1	1	1	0	0	0	0	0	1	1	1	1	1	0	0	0	0	0
CD274	0	0	0	0	0	0	0	1	0	0	0	0	0	0	0	0	0
CD28	1	1	0	1	0	0	0	1	1	1	1	1	0	0	0	0	1
CD2BP2	0	0	0	1	0	0	0	1	1	0	0	0	0	0	0	0	0
CD3D	0	0	0	0	0	0	1	0	0	0	0	0	0	0	0	0	1
CD3E	0	0	0	0	0	0	1	0	0	0	0	0	0	0	0	0	1
CD3G	0	0	0	0	0	0	1	0	0	0	0	0	0	0	0	0	1
CD3Z	0	0	0	0	0	0	0	0	0	0	0	0	0	0	0	0	1
CD4	0	0	0	1	0	0	1	1	1	0	0	0	0	0	0	0	0
CD40	0	1	0	0	1	1	0	1	0	1	0	0	0	0	0	0	1
CD40LG	0	0	0	0	0	0	0	0	0	0	0	0	0	0	0	0	1
CD44	1	1	1	1	0	0	1	1	1	1	1	1	0	0	0	0	0
CD46	0	0	0	0	0	0	0	0	0	0	0	0	0	0	0	0	1
CD47	0	0	0	0	0	0	1	0	0	0	0	0	0	0	0	0	0
CD48	1	0	1	1	0	0	1	1	1	0	1	1	0	0	0	0	0
CD5	1	1	1	1	0	1	1	1	1	1	1	1	0	0	0	0	0
CD55	0	0	0	0	0	0	0	1	1	0	0	0	0	0	0	0	1
CD58	0	0	0	0	0	0	0	1	0	0	0	0	0	0	0	0	0
CD59	0	0	0	0	0	0	1	0	0	0	0	0	0	0	0	0	1
CD6	1	1	1	1	1	1	1	1	1	0	1	1	0	0	0	0	0
CD63	1	0	1	1	0	0	1	1	1	0	0	0	0	0	0	0	0
CD69	1	0	1	1	1	0	0	1	1	0	0	0	0	0	0	0	0
CD7	0	0	0	0	0	0	1	0	0	0	0	0	0	0	0	0	0
CD70	0	0	0	0	0	0	0	0	0	0	0	0	0	0	0	0	1
CD74	0	0	0	1	0	0	0	1	1	0	0	0	0	0	0	0	0
CD79A	0	0	0	0	0	0	0	1	1	0	0	0	0	0	0	0	0
CD79B	0	0	0	0	0	0	0	0	0	0	0	0	0	0	0	0	1
CD80	0	1	0	0	1	0	0	1	0	0	0	0	0	0	0	0	0
CD81	0	0	0	0	0	0	0	0	0	0	0	0	0	0	0	0	1
CD82	0	0	0	0	0	0	1	0	0	0	0	0	0	0	0	0	0
CD83	0	0	0	0	0	0	0	0	0	0	0	1	0	0	0	0	0
CD84	1	0	1	1	0	0	1	1	1	0	0	1	0	0	0	0	0
CD86	0	0	0	0	1	0	0	1	0	1	0	0	0	0	0	0	0
CD8A	0	0	0	0	0	0	0	0	0	0	0	0	0	0	0	0	1
CD9	1	0	0	1	0	0	1	1	1	0	1	1	0	0	0	0	0
CDC25C	0	0	0	0	0	0	1	0	0	0	0	0	0	0	0	0	0
CDC34	0	0	0	0	0	0	0	1	0	0	0	0	0	0	0	0	0
CDC37	1	0	1	1	1	0	1	1	1	0	1	1	0	0	0	0	0
CDC37P1	0	0	0	0	0	0	0	0	0	1	0	0	0	0	0	0	0
CDC40	0	0	0	0	0	0	1	0	0	0	0	0	0	0	0	0	0
CDC42	0	0	0	0	0	0	0	0	0	0	0	0	0	0	0	0	1
CDC42BPB	1	0	0	0	0	0	0	1	0	0	0	0	0	0	0	0	0
CDC42EP1	0	0	0	0	0	0	1	0	0	0	0	0	0	0	0	0	0
CDC42SE2	0	0	0	0	0	0	1	1	0	0	0	0	0	0	0	0	0
CDC73	0	0	0	0	0	0	1	1	0	0	0	0	0	0	0	0	0
CDCA2	0	0	0	0	0	0	0	1	1	0	0	0	0	0	0	0	0
CDCA3	0	0	0	1	0	0	1	1	1	1	0	0	0	0	0	0	0
CDCA4	0	0	0	0	0	0	1	0	0	0	0	0	0	0	0	0	0
CDCA7	0	0	0	0	0	0	0	0	0	0	0	0	0	0	0	0	1
CDCA8	0	0	0	1	0	0	1	1	1	0	0	0	0	0	0	0	0
CDH1	1	0	0	0	0	0	0	1	0	0	0	0	0	0	0	0	0
CDH15	0	0	0	0	0	0	0	1	0	0	0	0	0	0	0	0	0
CDH22	0	0	0	1	0	0	1	1	1	0	0	0	0	0	0	0	0
CDH3	0	0	0	0	0	0	0	1	0	1	0	0	0	0	0	0	0
CDHR1	0	0	0	0	0	0	1	0	0	0	0	0	0	0	0	0	0
CDHR2	0	0	0	0	0	0	0	1	0	0	0	0	0	0	0	0	0
CDHR4	0	0	0	0	0	0	1	0	0	0	0	0	0	0	0	0	0
CDK1	0	0	0	0	0	0	1	0	0	0	1	1	0	0	0	0	0
CDK11B	0	0	0	0	0	0	1	0	0	0	0	0	0	0	0	0	0
CDK12	0	0	0	1	0	0	1	1	1	0	0	0	0	0	0	0	0
CDK17	0	0	0	0	0	0	1	0	0	0	0	0	0	0	0	0	0
CDK2	1	0	1	0	0	0	1	1	0	0	0	0	0	0	0	0	0
CDK2AP1	0	0	0	0	0	0	0	1	0	1	0	0	0	0	0	0	0
CDK4	0	0	0	1	0	0	1	1	1	0	0	0	0	0	0	0	0
CDK5R2	0	0	0	0	0	0	0	0	0	0	1	1	0	0	0	0	0
CDK5RAP2	0	0	0	0	0	0	0	1	0	0	1	1	0	0	0	0	0
CDK6	1	0	1	1	1	0	1	1	1	0	0	0	0	0	0	0	0
CDKN1A	1	0	1	1	0	0	0	1	1	0	0	0	0	0	0	0	0
CDKN1B	0	0	0	1	0	0	0	1	1	0	0	0	0	0	0	0	0
CDKN1C	0	0	0	0	0	0	0	1	0	0	0	0	0	0	0	0	0
CDKN2D	1	0	1	1	0	0	1	1	1	0	1	1	0	0	0	0	0
CDKN3	0	0	0	0	0	0	0	1	0	0	0	0	0	0	0	0	0
CDX1	0	0	0	0	0	0	0	1	0	0	0	0	0	0	0	0	0
CDYL	0	0	0	0	0	0	1	0	0	0	0	0	0	0	0	0	0
CEACAM18	0	0	0	1	0	0	0	1	1	0	0	0	0	0	0	0	0
CEBPA	0	0	0	0	0	0	0	1	0	0	0	0	0	0	0	0	0
CEBPA-AS1	0	0	0	0	0	0	0	1	0	0	0	0	0	0	0	0	0
CEBPB	1	0	0	1	0	0	0	1	1	0	0	1	0	0	1	0	0
CEBPB-AS1	0	0	0	0	0	0	0	0	0	0	0	1	0	0	0	0	0
CEBPE	0	0	0	0	0	0	0	0	0	0	0	0	0	0	0	0	1
CEBPG	0	0	0	0	0	0	0	1	0	0	0	0	0	0	0	0	0
CELF3	0	0	0	0	0	0	0	1	0	0	0	0	0	0	0	0	0
CEND1	0	0	0	1	0	0	1	1	1	0	0	0	0	0	0	0	0
CENPE	0	0	0	1	0	0	0	1	1	0	0	0	0	0	0	0	0
CENPF	0	0	0	0	0	0	0	1	0	0	0	0	0	0	0	0	0
CENPK	0	0	0	0	0	0	1	0	0	0	0	0	0	0	0	0	0
CENPL	1	0	1	1	0	0	1	1	1	0	0	0	0	0	0	0	0
CENPN	0	0	0	0	0	0	0	1	0	0	0	0	0	0	0	0	0
CENPO	0	0	0	0	1	0	0	0	0	0	0	0	1	0	0	0	0
CENPW	0	1	0	0	0	1	0	1	0	1	0	0	0	0	0	0	0
CEP120	0	0	0	0	0	0	1	0	0	0	0	0	0	0	0	0	0
CEP128	0	0	0	0	0	0	1	0	0	0	0	0	0	0	0	0	0
CEP19	1	0	0	0	0	0	0	0	0	0	0	0	0	0	0	0	0
CEP192	0	0	0	0	0	0	0	1	0	0	0	0	0	0	0	0	0
CEP55	0	0	0	0	0	0	1	0	0	0	0	0	0	0	0	0	0
CEP68	0	0	0	1	0	0	1	1	1	0	0	0	0	0	0	0	0
CEP76	0	0	0	1	0	0	0	1	1	0	0	0	0	0	0	0	0
CEP85L	0	0	0	0	0	0	1	0	0	0	0	0	0	0	0	0	0
CERKL	0	0	0	0	0	0	0	1	0	1	0	0	0	0	0	0	0
CERS5	0	0	0	0	0	0	0	1	0	0	0	0	0	0	0	0	0
CERS6	0	0	0	0	0	0	1	0	0	0	0	0	0	0	0	0	0
CETN3	0	0	0	0	0	0	1	0	0	0	0	0	0	0	0	0	0
CETN4P	0	0	0	0	0	0	0	1	1	0	0	0	0	0	0	0	0
CFAP126	0	0	0	0	0	0	0	0	0	0	0	1	0	0	0	0	0
CFAP65	0	0	0	0	0	0	0	0	0	0	1	1	0	0	0	0	0
CFB	0	0	0	0	0	0	0	1	0	0	0	0	0	0	0	0	1
CFD	1	0	0	0	0	0	0	1	0	0	0	0	0	0	0	0	1
CFDP1	1	0	1	0	0	0	0	0	0	0	0	0	0	0	0	0	0
CFH	0	0	0	0	0	0	0	0	0	0	0	0	0	0	0	0	1
CFHR1	0	0	0	0	0	0	0	0	0	0	0	0	0	0	0	0	1
CFHR2	0	0	0	0	0	0	0	0	0	0	0	0	0	0	0	0	1
CFHR3	0	0	0	0	0	0	0	0	0	0	0	0	0	0	0	0	1
CFHR4	0	0	0	0	0	0	0	0	0	0	0	0	0	0	0	0	1
CFHR5	0	0	0	0	0	0	0	0	0	0	0	0	0	0	0	0	1
CFI	0	0	0	0	0	0	0	0	0	0	0	0	0	0	0	0	1
CFL1	1	1	1	0	0	0	0	0	0	0	1	1	0	0	0	0	0
CFL2	0	0	0	1	0	0	1	1	1	0	0	0	0	0	0	0	0
CFLAR	0	0	0	1	0	1	1	1	1	0	0	0	0	0	0	0	0
CFLAR-AS1	0	0	0	0	0	0	0	1	1	0	0	0	0	0	0	0	0
CFP	0	0	0	0	0	0	0	0	0	0	0	0	0	0	0	0	1
CFTR	0	0	0	0	0	0	0	0	0	0	0	0	0	0	0	0	1
CGGBP1	0	0	0	0	0	0	1	0	0	0	0	0	0	0	0	0	0
CGN	0	0	0	1	0	0	0	1	1	0	0	0	0	0	0	0	0
CH25H	1	0	0	1	0	0	1	1	1	0	0	0	0	0	0	0	0
CHAC2	1	0	1	1	0	0	1	1	1	0	0	0	0	0	0	0	0
CHADL	0	0	0	0	0	0	0	1	0	0	0	0	0	0	0	0	0
CHCHD1	1	0	1	1	0	0	1	1	1	0	0	0	0	0	0	0	0
CHCHD2	0	0	0	0	0	0	1	0	0	0	0	0	0	0	0	0	0
CHCHD5	0	0	0	0	0	0	0	1	0	0	0	0	0	0	0	0	0
CHD1	1	0	1	1	0	0	1	1	1	0	0	0	0	0	0	0	0
CHD2	0	0	0	0	0	0	1	0	0	0	0	0	0	0	0	0	0
CHD4	1	0	1	1	0	0	1	1	1	0	0	1	0	0	0	0	0
CHD7	0	0	0	0	0	0	1	0	0	0	0	0	0	0	0	0	1
CHID1	0	0	0	0	0	0	1	0	0	0	0	0	0	0	0	0	0
CHML	0	0	0	0	0	0	0	1	1	0	0	0	0	0	0	0	0
CHMP4C	0	0	0	0	0	0	0	1	0	0	0	0	0	0	0	0	0
CHPF	0	0	0	0	0	0	0	1	1	0	0	0	0	0	0	0	0
CHRNB2	1	0	0	1	0	0	0	1	1	0	0	0	0	0	0	0	0
CHRNE	0	0	0	1	0	0	0	1	1	0	0	0	0	0	0	0	0
CHST12	0	0	0	0	0	0	0	0	0	0	0	1	0	0	0	0	0
CHST15	0	0	0	0	0	0	0	1	0	0	0	0	0	0	0	0	0
CHTF8	1	0	1	1	0	0	1	1	1	0	0	0	0	0	0	0	0
CHUK	0	0	0	0	0	0	0	0	0	0	0	0	0	0	0	0	1
CIB1	0	0	0	0	0	0	0	0	0	0	0	0	0	0	0	0	1
CIITA	0	0	0	0	0	0	0	0	0	0	0	1	0	0	0	0	1
CIRBP	1	0	0	1	0	0	1	1	1	0	0	0	1	0	0	0	0
CIRBP-AS1	1	0	0	0	0	0	1	0	0	0	0	0	0	0	0	0	0
CIRH1A	1	0	1	1	0	0	1	1	1	0	0	0	0	0	0	0	0
CISD1	0	0	0	1	0	1	1	1	1	1	0	0	0	0	0	0	0
CISD2	1	0	1	1	0	0	1	1	1	1	0	0	0	0	0	0	0
CITED2	0	0	0	0	0	0	0	1	0	0	0	0	0	0	0	0	0
CITF22-24E5.1	0	0	0	0	0	0	0	1	0	0	0	0	0	0	0	0	0
CK79A	0	0	0	0	0	0	0	0	0	0	0	0	0	0	0	0	1
CKAP2	0	0	0	0	0	0	1	0	0	0	0	0	0	0	0	0	0
CKAP2L	1	0	1	0	0	0	0	1	0	0	0	0	0	0	1	0	0
CKS1B	1	0	1	0	0	0	1	0	0	0	0	0	0	0	0	0	0
CKS2	0	0	0	0	0	0	1	1	0	0	0	0	0	0	0	0	0
CLCF1	0	0	0	0	0	0	1	0	0	0	0	0	0	0	0	0	0
CLCN7	0	0	0	0	0	0	0	0	0	0	0	0	0	0	0	0	1
CLDN23	1	0	0	1	0	0	0	1	1	0	0	1	0	0	0	0	0
CLDND1	0	0	0	0	0	0	0	1	0	0	0	0	0	0	0	0	0
CLDND2	0	0	0	0	0	0	0	1	0	0	0	0	0	0	0	0	0
CLEC12A	0	0	0	0	0	0	0	1	0	0	0	0	0	0	0	0	0
CLEC12B	0	0	0	0	0	0	0	1	0	0	0	0	0	0	0	0	0
CLEC16A	1	0	1	1	1	0	1	1	1	1	1	1	0	0	1	0	0
CLEC1B	0	0	0	0	0	0	0	1	0	0	0	0	0	0	0	0	0
CLEC2A	0	0	0	0	0	0	1	0	0	0	0	0	0	0	0	0	0
CLEC2B	0	0	0	1	0	0	1	1	1	0	0	0	0	0	0	0	0
CLEC2D	1	0	1	0	0	1	1	0	0	0	0	0	0	0	0	0	0
CLEC2L	0	0	0	0	0	0	0	1	0	0	0	0	0	0	0	0	0
CLEC4F	1	0	0	0	0	0	0	1	0	1	0	0	0	0	0	0	0
CLEC7A	0	0	0	0	0	0	1	1	0	0	0	0	0	0	0	0	0
CLEC9A	0	0	0	0	0	0	0	1	0	0	0	0	0	0	0	0	0
CLECL1	1	1	0	1	0	1	0	1	1	1	0	0	0	0	0	0	0
CLHC1	1	0	0	1	0	0	1	1	1	0	0	0	0	0	0	0	0
CLIC1	1	0	1	1	0	0	1	1	1	0	0	0	0	0	0	0	0
CLIP4	0	0	0	0	0	0	1	0	0	0	0	0	0	0	0	0	0
CLK1	0	0	0	1	0	0	0	1	1	0	0	0	0	0	0	0	0
CLK3	1	0	0	0	0	0	0	1	0	0	0	0	0	0	1	0	0
CLMP	0	0	0	0	0	0	1	0	0	0	0	0	0	0	0	0	0
CLN3	1	1	0	1	1	1	0	1	1	0	0	0	0	0	0	0	0
CLN8	0	0	0	0	0	0	1	0	0	0	0	0	0	0	0	0	0
CLNK	0	0	0	0	0	0	0	0	0	1	0	0	0	0	0	0	0
CLPB	0	0	0	0	0	0	0	0	0	0	0	0	0	0	0	0	1
CLPSL1	0	0	0	0	0	0	0	1	0	0	0	0	0	0	0	0	0
CLPSL2	0	0	0	0	0	0	0	1	0	0	0	0	0	0	0	0	0
CLSTN3	0	0	0	0	0	0	1	0	0	0	0	0	0	0	0	0	0
CLTA	0	0	0	0	0	0	1	0	0	0	0	0	0	0	0	0	0
CLTB	0	0	0	0	0	0	1	0	0	0	0	0	0	0	0	0	0
CLTC	0	0	0	1	0	0	0	1	1	0	0	0	0	0	0	0	0
CLUH	0	0	0	0	0	0	1	0	0	0	0	0	0	0	0	0	0
CLUHP3	0	0	0	0	0	0	0	1	1	0	0	0	0	0	0	0	0
CLYBL	0	0	0	0	0	0	0	1	0	0	0	1	0	0	0	0	0
CMA1	0	0	0	0	0	0	0	1	0	0	0	0	0	0	0	0	0
CMBL	0	0	0	1	0	0	0	1	1	0	0	0	0	0	1	0	0
CMC1	1	0	1	1	0	0	1	1	1	0	0	0	0	0	0	0	0
CMC2	0	0	0	0	0	0	0	1	0	0	0	0	0	0	0	0	0
CMIP	0	0	0	0	0	0	0	1	0	0	0	0	0	0	0	0	0
CMSS1	0	0	0	0	0	0	1	1	0	0	0	0	0	0	0	0	0
CMTM6	0	0	0	1	0	0	1	1	1	0	0	0	0	0	0	0	0
CMTM7	0	0	0	1	0	0	0	1	1	0	0	0	0	0	0	0	0
CNEP1R1	0	0	0	1	0	0	0	1	1	0	1	1	0	0	0	0	0
CNGA1	1	0	0	0	0	0	0	0	0	0	0	0	0	0	0	0	0
CNIH1	0	0	0	0	0	0	0	1	0	0	0	0	0	0	0	0	0
CNIH2	0	0	0	0	0	0	0	1	0	0	0	0	0	0	0	0	0
CNN2	1	1	1	1	0	1	1	1	1	1	1	1	0	0	1	0	0
CNOT10	0	0	0	0	0	0	0	1	0	0	0	0	0	0	0	0	0
CNOT10-AS1	0	0	0	0	0	0	0	1	0	0	0	0	0	0	0	0	0
CNOT9	0	0	0	0	0	0	0	0	0	0	1	1	0	0	0	0	0
CNP	0	0	0	1	0	0	0	1	1	0	0	0	0	0	0	0	0
CNPPD1	0	0	0	1	0	0	0	1	1	0	0	0	0	0	0	0	0
CNPY2	1	0	1	1	0	0	0	1	1	0	0	0	0	0	0	0	0
CNTRL	1	0	0	1	0	0	1	1	1	0	0	0	0	0	0	0	0
COA4	0	0	0	0	0	0	1	0	0	0	0	0	0	0	0	0	0
COASY	0	0	0	0	0	0	0	1	0	0	0	0	0	0	0	0	0
COBL	0	0	0	0	0	0	0	1	0	0	0	0	0	0	0	0	0
COG1	0	0	0	0	0	0	0	1	0	0	0	0	0	0	0	0	0
COG6	1	0	1	0	0	0	1	1	0	0	0	0	0	0	0	0	0
COG8	0	0	0	0	0	0	1	0	0	0	0	0	0	0	0	0	0
COIL	1	0	1	1	0	0	0	1	1	0	0	0	0	0	0	0	0
COL11A2	0	0	0	0	0	0	0	1	0	0	0	0	0	0	0	0	0
COL2A1	0	0	0	0	0	0	0	0	0	0	1	0	0	0	0	0	0
COL4A3	0	0	0	0	0	0	1	0	0	0	0	0	0	0	0	0	0
COL5A3	0	0	0	0	0	0	1	0	0	0	0	0	0	0	0	0	0
COMMD1	1	0	1	1	0	0	1	1	1	0	0	0	0	0	0	0	0
COMMD4	0	0	0	0	0	0	0	0	0	0	1	1	0	0	0	0	0
COMMD6	0	0	0	1	0	0	0	1	1	0	0	0	0	0	0	0	0
COMMD9	1	0	1	1	0	0	1	1	1	0	0	0	0	0	1	0	0
COMTD1	1	0	1	0	0	0	0	0	0	0	0	0	0	0	0	0	0
COPA	0	0	0	0	0	0	0	0	0	0	0	0	0	0	0	0	1
COPE	0	0	0	0	0	0	0	1	0	0	0	0	0	0	0	0	0
COPG1	0	0	0	0	0	0	0	0	0	0	0	0	0	0	0	0	1
COPS6	0	0	0	0	0	0	1	0	0	0	0	0	0	0	0	0	0
COPS7A	0	0	0	1	0	0	1	1	1	0	1	1	0	0	0	0	0
COPZ1	0	0	0	0	0	0	1	1	0	0	0	0	0	0	0	0	0
COQ10A	1	0	0	0	0	0	1	1	0	0	0	0	0	0	0	0	0
COQ10B	0	0	0	0	0	0	1	0	0	0	0	0	0	0	0	0	0
CORO1A	0	0	0	0	0	0	0	0	0	0	0	0	0	0	0	0	1
CORO1C	0	0	0	0	0	0	1	0	0	0	0	0	0	0	0	0	0
COX11	1	0	0	0	0	0	0	0	0	0	0	0	0	0	0	0	0
COX16	0	0	0	0	0	0	1	0	0	0	0	0	0	0	0	0	0
COX17	0	0	0	0	0	0	1	0	0	0	0	0	0	0	0	0	0
COX20P2	0	0	0	0	0	0	0	1	1	0	0	0	0	0	0	0	0
COX4I1	0	0	0	1	0	0	1	1	1	0	0	0	0	0	0	0	0
COX5A	1	0	1	1	0	0	1	1	1	0	1	1	0	0	0	0	0
COX6A2	1	0	0	1	0	0	0	1	1	0	0	0	0	0	0	0	0
COX6CP1	0	0	0	0	0	0	1	0	0	0	0	0	0	0	0	0	0
COX6CP7	0	0	0	0	0	0	0	1	1	0	0	0	0	0	0	0	0
COX7A2	0	0	0	0	0	0	1	0	0	0	0	0	0	0	0	0	0
CPLX1	1	0	0	0	0	0	0	0	0	0	0	0	0	0	0	0	0
CPLX3	1	1	0	1	0	0	0	1	1	0	0	0	0	0	0	0	0
CPNE5	1	0	0	1	0	0	1	1	1	0	0	0	0	0	0	0	0
CPPED1	0	0	0	0	0	0	0	0	0	0	0	1	0	0	0	0	0
CPSF2	0	0	0	0	0	0	1	0	0	0	0	0	0	0	0	0	0
CPSF3	0	0	0	0	0	0	1	0	0	0	0	0	0	0	0	0	0
CPSF3L	1	0	1	1	1	0	1	1	1	0	0	0	0	0	0	0	0
CPSF7	1	0	1	0	0	0	1	0	0	0	0	0	0	0	0	0	0
CPT1C	1	1	0	0	0	0	1	0	0	0	0	0	0	0	0	0	0
CPVL	0	0	0	0	1	0	0	0	0	0	0	0	0	0	0	0	0
CRACR2A	0	0	0	0	0	0	0	0	0	0	0	0	0	0	0	0	1
CRADD	0	0	0	0	0	0	1	0	0	0	0	0	0	0	0	0	0
CREB1	0	0	0	0	0	0	1	0	0	0	0	0	0	0	0	0	0
CREB5	0	0	0	0	0	0	1	1	0	0	0	0	0	0	0	0	0
CREG1	1	0	0	0	0	0	0	1	1	0	1	1	0	0	0	0	0
CREG2	0	0	0	1	0	0	0	1	1	0	0	0	0	0	0	0	0
CREM	1	1	1	1	1	0	1	1	1	0	1	1	0	0	1	0	0
CRHR1-IT1	0	0	0	0	0	0	0	1	0	1	0	0	0	0	0	0	0
CRIP1	0	0	0	0	0	0	0	1	0	0	0	0	0	0	0	0	0
CRIP2	0	0	0	0	0	0	0	1	0	0	0	0	0	0	0	0	0
CRIPAK	0	0	0	0	0	0	0	0	0	1	0	0	0	0	0	0	0
CRTC3	1	0	0	1	1	0	0	1	1	1	0	0	0	0	0	0	0
CRYAA	1	0	0	1	0	0	0	1	1	0	0	0	0	0	0	0	0
CRYAB	0	0	0	1	0	0	0	1	1	0	0	0	0	0	0	0	0
CRYBA2	0	0	0	0	0	0	0	0	0	0	1	1	0	0	0	0	0
CRYZL1	1	0	0	0	0	0	1	0	0	0	0	0	0	0	0	0	0
CS	1	1	1	0	0	0	1	1	1	0	0	0	0	0	0	0	0
CSAD	0	0	0	0	0	0	1	0	0	0	0	0	0	0	0	0	0
CSDC2	0	0	0	0	0	0	0	1	0	0	0	0	0	0	0	0	0
CSDE1	0	0	0	1	0	0	0	1	1	0	0	0	0	0	0	0	0
CSF2RA	0	0	0	0	0	0	0	0	0	0	0	0	0	0	0	0	1
CSF2RB	0	0	0	0	1	0	1	1	0	0	0	0	0	0	0	0	0
CSF3R	0	0	0	0	0	0	0	0	0	0	0	0	0	0	0	0	1
CSFR2B	0	0	0	0	0	0	0	0	0	0	0	0	0	0	0	0	1
CSGALNACT2	0	0	0	0	1	0	0	1	1	0	0	0	0	0	0	0	0
CSK	1	1	1	1	1	0	0	1	1	0	1	1	0	0	0	0	0
CSNK1A1	0	0	0	0	0	0	1	0	0	0	0	0	0	0	0	0	0
CSNK1D	0	0	0	0	0	0	1	0	0	0	0	0	0	0	0	0	0
CSNK1G3	0	0	0	0	0	0	1	0	0	0	0	0	0	0	0	0	0
CSNK2B	1	0	1	1	0	0	1	1	1	1	0	0	0	0	0	0	0
CSNK2B-LY6G5B-1181	1	0	0	1	0	0	1	1	1	0	0	0	0	0	0	0	0
CSPG4	0	0	0	0	0	0	0	0	0	1	0	0	0	0	0	0	0
CST6	1	0	0	1	0	0	0	1	1	0	0	0	0	0	0	0	0
CSTA	0	0	0	0	0	0	0	1	0	0	0	0	0	0	0	0	0
CSTF1	0	0	0	0	0	0	0	1	0	0	0	0	0	0	0	0	0
CSTF2T	0	0	0	0	0	0	1	0	0	0	0	0	0	0	0	0	0
CSTF3	0	0	0	0	0	0	1	0	0	0	0	0	0	0	0	0	0
CSTF3-AS1	0	0	0	0	0	0	1	0	0	0	0	0	0	0	0	0	0
CTA-212D2.2	0	0	0	0	0	0	0	1	1	0	0	0	0	0	0	0	0
CTA-223H9.9	0	0	0	0	1	0	0	0	0	0	0	0	0	0	0	0	0
CTA-250D10.23	0	0	0	0	0	0	0	0	0	1	0	0	0	0	0	0	0
CTA-276O3.4	0	0	0	0	0	0	1	0	0	0	0	0	0	0	0	0	0
CTA-293F17.1	0	0	0	0	0	0	0	1	0	1	0	0	0	0	0	0	0
CTA-298G8.1	0	0	0	0	0	0	1	0	0	0	0	0	0	0	0	0	0
CTA-398F10.1	1	0	0	0	0	0	0	0	0	0	0	0	0	0	0	0	0
CTA-398F10.2	1	0	0	0	0	0	0	0	0	0	0	0	0	0	0	0	0
CTA-833B7.2	0	0	0	0	0	0	0	1	0	0	0	0	0	0	0	0	0
CTA-85E5.6	0	0	0	0	1	0	0	0	0	0	0	0	0	0	0	0	0
CTAGE5	0	0	0	0	0	0	0	1	0	0	0	0	0	0	0	0	0
CTB-113P19.3	0	0	0	0	0	0	0	1	0	0	0	0	0	0	0	0	0
CTB-114C7.3	0	0	0	0	0	0	1	0	0	0	0	0	0	0	0	0	0
CTB-119C2.1	0	0	0	0	0	0	1	0	0	0	0	0	0	0	0	0	0
CTB-129O4.1	0	0	0	0	0	0	1	0	0	0	0	0	0	0	0	0	0
CTB-12A17.3	0	0	0	0	0	0	0	1	1	0	0	0	0	0	0	0	0
CTB-161K23.1	0	0	0	0	0	0	1	0	0	0	0	0	0	0	0	0	0
CTB-161M19.1	0	0	0	0	0	0	1	0	0	0	0	0	0	0	0	0	0
CTB-161M19.2	0	0	0	0	0	0	1	0	0	0	0	0	0	0	0	0	0
CTB-161M19.4	1	0	0	0	0	0	1	1	1	0	0	0	0	0	0	0	0
CTB-174O21.2	0	0	0	0	0	0	0	1	0	0	0	0	0	0	0	0	0
CTB-31O20.8	0	0	0	0	0	0	0	0	0	1	0	0	0	0	0	0	0
CTB-33G10.6	0	1	0	0	0	0	1	0	0	0	0	0	0	0	0	0	0
CTB-36H16.2	0	0	0	0	0	0	1	0	0	0	0	0	0	0	0	0	0
CTB-39G8.2	0	0	0	0	1	0	0	0	0	0	0	0	0	0	0	0	0
CTB-40H15.4	0	0	0	0	0	0	1	1	1	0	0	0	0	0	0	0	0
CTB-49A3.4	0	0	0	0	0	0	0	1	1	0	0	0	0	0	0	0	0
CTB-4E7.1	0	0	0	0	0	0	1	0	0	0	0	0	0	0	0	0	0
CTB-58E17.1	0	0	0	0	0	0	1	0	0	0	0	0	0	0	0	0	0
CTB-60B18.12	0	0	0	0	0	0	0	1	0	0	0	0	0	0	0	0	0
CTB-60B18.18	0	0	0	0	0	0	0	1	0	0	0	0	0	0	0	0	0
CTB-61M7.1	0	0	0	0	0	0	0	1	1	0	0	0	0	0	0	0	0
CTB-79E8.2	1	0	0	0	0	0	0	1	1	0	0	0	0	0	0	0	0
CTC-215O4.4	0	0	0	0	0	0	0	0	0	1	0	0	0	0	0	0	0
CTC-241F20.3	0	0	0	0	0	0	0	1	1	0	0	0	0	0	0	0	0
CTC-241F20.4	0	0	0	0	0	0	0	0	0	1	0	0	0	0	0	0	0
CTC-273B12.10	1	0	1	0	0	0	0	1	0	0	0	0	0	0	0	0	0
CTC-273B12.5	1	0	0	0	0	0	0	1	1	0	0	0	1	0	0	0	0
CTC-276P9.2	0	0	0	0	1	0	0	0	0	0	0	0	0	0	0	0	0
CTC-293G12.1	1	0	0	0	0	0	1	0	0	0	0	0	0	0	0	0	0
CTC-301O7.4	0	0	0	0	0	0	0	0	0	1	0	0	0	0	0	0	0
CTC-308K20.1	0	0	0	0	0	0	0	1	0	0	0	0	0	0	0	0	0
CTC-308K20.2	0	0	0	0	0	0	0	1	0	0	0	0	0	0	0	0	0
CTC-336P14.1	0	0	0	0	0	0	1	0	0	0	0	0	0	0	0	0	0
CTC-345K18.2	1	0	0	0	0	0	0	0	0	0	0	0	0	0	0	0	0
CTC-350I8.1	0	0	0	0	0	0	0	1	0	0	0	0	0	0	0	0	0
CTC-370J7.1	0	0	0	0	0	0	1	0	0	0	0	0	0	0	0	0	0
CTC-425F1.4	0	0	0	0	0	0	1	0	0	0	0	0	0	0	0	0	0
CTC-428G20.2	0	0	0	0	0	0	1	0	0	0	0	0	0	0	0	0	0
CTC-429L19.3	0	0	0	0	0	0	0	1	0	0	0	0	0	0	0	0	0
CTC-432M15.3	0	0	0	0	0	0	0	1	0	0	0	0	0	0	0	0	0
CTC-459M5.1	0	0	0	0	0	0	0	1	0	0	0	0	0	0	0	0	0
CTC-459M5.2	0	0	0	0	0	0	0	1	0	0	0	0	0	0	0	0	0
CTC-461F20.1	0	0	0	0	0	0	1	0	0	0	0	0	0	0	0	0	0
CTC-471J1.8	0	0	0	0	0	0	0	1	0	0	0	0	0	0	0	0	0
CTC-487M23.7	0	0	0	0	0	0	1	0	0	0	0	0	0	0	0	0	0
CTC-487M23.8	0	0	0	0	0	0	1	1	0	0	0	0	0	0	0	0	0
CTC-506B8.1	1	0	0	0	0	0	0	1	1	0	0	0	0	0	0	0	0
CTC-512J12.4	0	0	0	0	0	0	0	1	1	0	0	0	0	0	0	0	0
CTC-512J12.6	0	0	0	1	0	0	0	1	1	0	0	0	0	0	0	0	0
CTC-518P12.6	0	0	0	0	0	0	0	1	0	0	0	0	0	0	0	0	0
CTC-524C5.2	0	0	0	0	0	1	0	0	0	0	0	0	0	0	0	0	0
CTC-524C5.5	0	0	0	0	0	0	0	0	0	1	0	0	0	0	0	0	0
CTC-539A10.7	0	0	0	0	0	0	0	1	1	0	0	0	0	0	0	0	0
CTC1	0	0	0	0	0	0	0	0	0	0	0	0	0	0	0	0	1
CTD-2001C12.1	1	0	0	0	0	0	1	1	1	0	0	0	0	0	0	0	0
CTD-2002H8.2	0	0	0	0	0	0	1	0	0	0	0	0	0	0	0	0	0
CTD-2007H13.1	0	0	0	0	0	0	1	0	0	0	0	0	0	0	0	0	0
CTD-2007H13.3	1	0	0	0	0	0	1	1	1	0	0	0	0	0	0	0	0
CTD-2020K17.1	0	0	0	0	0	0	0	1	1	0	0	0	0	0	0	0	0
CTD-2020K17.3	0	0	0	0	0	0	0	1	1	1	0	0	0	0	0	0	0
CTD-2031P19.3	1	0	1	0	0	0	1	1	1	0	0	0	0	0	0	0	0
CTD-2033C11.1	0	0	0	0	0	0	1	0	0	0	0	0	0	0	0	0	0
CTD-2035E11.3	0	0	0	0	0	0	1	1	1	0	0	0	0	0	0	0	0
CTD-2049J23.3	0	0	0	0	1	0	0	0	0	0	0	0	0	0	0	0	0
CTD-2108O9.4	0	0	0	0	0	0	0	1	1	0	0	0	0	0	0	0	0
CTD-2113L7.1	1	1	0	0	0	0	1	1	1	1	0	0	0	0	0	0	0
CTD-2127H9.1	0	1	0	0	0	0	0	0	0	0	0	0	0	0	0	0	0
CTD-2132N18.3	0	0	0	0	0	0	0	1	0	0	0	0	0	0	0	0	0
CTD-2154B17.4	0	1	0	0	0	0	0	1	1	0	0	0	0	0	0	0	0
CTD-2154I11.2	0	0	0	0	0	0	1	0	0	0	0	0	0	0	0	0	0
CTD-2184C24.2	0	0	0	0	0	0	1	0	0	0	0	0	0	0	0	0	0
CTD-2186M15.3	0	0	0	0	0	0	1	0	0	0	0	0	0	0	0	0	0
CTD-2192J16.26	0	0	0	0	0	0	1	0	0	0	0	0	0	0	0	0	0
CTD-2200A16.1	0	0	0	0	0	0	0	1	0	0	0	0	0	0	0	0	0
CTD-2201E18.3	0	0	0	0	0	0	1	1	1	0	0	0	0	0	0	0	0
CTD-2201E18.5	0	0	0	0	0	0	1	0	0	0	0	0	0	0	0	0	0
CTD-2203K17.1	0	0	0	0	0	0	1	0	0	0	0	0	0	0	0	0	0
CTD-2213F21.2	0	0	0	0	0	0	1	0	0	0	0	0	0	0	0	0	0
CTD-2215E18.1	0	0	0	0	0	0	0	1	0	0	0	0	0	0	0	0	0
CTD-2215E18.2	0	0	0	0	0	0	0	1	0	0	0	0	0	0	0	0	0
CTD-2227E11.1	0	0	0	0	0	0	1	0	0	0	0	0	0	0	0	0	0
CTD-2227I18.1	1	0	0	0	0	0	1	0	0	0	0	0	0	0	0	0	0
CTD-2235H24.2	1	0	0	0	0	0	0	0	0	0	0	0	0	0	0	0	0
CTD-2240E14.4	0	0	0	0	0	0	0	1	0	0	0	0	0	0	0	0	0
CTD-2256P15.1	1	0	0	0	0	0	1	1	1	0	0	0	0	0	0	0	0
CTD-2256P15.2	1	0	0	0	0	0	0	1	1	0	0	0	0	0	0	0	0
CTD-2260A17.1	1	0	1	0	1	0	0	1	1	1	0	0	0	0	0	0	0
CTD-2260A17.2	1	1	1	1	0	0	1	1	1	0	0	0	0	0	0	0	0
CTD-2260A17.3	1	0	0	0	0	0	1	1	1	1	0	0	0	0	0	0	0
CTD-2263F21.1	0	0	0	0	0	0	0	1	0	0	0	0	0	0	0	0	0
CTD-2277K2.1	1	0	0	0	0	0	1	0	0	0	0	0	0	0	0	0	0
CTD-2290P7.1	0	0	0	0	0	0	1	0	0	0	0	0	0	0	0	0	0
CTD-2301A4.1	0	0	0	0	0	0	1	0	0	0	0	0	0	0	0	0	0
CTD-2308G16.1	0	0	0	0	0	0	1	0	0	0	0	0	0	0	0	0	0
CTD-2311M21.3	1	0	0	0	0	0	0	1	1	0	0	0	0	0	0	0	0
CTD-2325P2.3	1	0	0	0	0	0	0	1	1	0	0	0	0	0	0	0	0
CTD-2325P2.4	1	0	0	0	0	0	0	1	1	0	0	0	0	0	0	0	0
CTD-2330K9.2	0	0	0	0	0	0	0	1	0	0	0	0	0	0	0	0	0
CTD-2330K9.3	0	0	0	0	0	0	0	1	0	0	0	0	0	0	0	0	0
CTD-2336O2.1	0	0	0	0	0	0	1	0	0	0	0	0	0	0	0	0	0
CTD-2337A12.1	0	0	0	0	0	0	1	0	0	0	0	0	0	0	0	0	0
CTD-2358C21.4	0	0	0	0	0	0	0	1	1	0	0	0	0	0	0	0	0
CTD-2369P2.10	1	1	0	0	0	0	0	1	0	0	0	0	0	0	0	0	0
CTD-2369P2.12	0	0	0	0	0	0	0	1	0	0	0	0	0	0	0	0	0
CTD-2369P2.4	1	0	0	0	0	0	0	1	1	0	0	0	0	0	0	0	0
CTD-2369P2.5	1	0	0	0	0	0	1	0	0	0	0	0	0	0	0	0	0
CTD-2369P2.8	1	1	0	0	0	0	1	1	1	0	0	0	0	0	0	0	0
CTD-2373H9.5	0	0	0	0	0	0	0	1	1	0	0	0	0	0	0	0	0
CTD-2410N18.3	0	0	0	0	0	0	1	0	0	0	0	0	0	0	0	0	0
CTD-2410N18.5	0	0	0	0	0	0	1	0	0	0	0	0	0	0	0	0	0
CTD-2525I3.2	0	0	0	0	0	0	0	1	0	0	0	0	0	0	0	0	0
CTD-2527I21.7	0	0	0	0	0	0	1	0	0	0	0	0	0	0	0	0	0
CTD-2531D15.5	0	0	0	0	0	0	1	0	0	0	0	0	0	0	0	0	0
CTD-2534I21.8	0	0	0	0	0	0	0	0	0	1	0	0	0	0	0	0	0
CTD-2540B15.7	0	0	0	0	0	0	0	1	0	0	0	0	0	0	0	0	0
CTD-2540B15.9	0	0	0	0	0	0	0	1	0	0	0	0	0	0	0	0	0
CTD-2541M15.1	0	0	0	0	0	0	1	1	1	0	0	0	0	0	0	0	0
CTD-2562J15.6	0	0	0	0	0	0	0	1	1	0	0	0	0	0	0	0	0
CTD-2566J3.1	0	0	0	0	0	0	0	1	0	0	0	0	0	0	0	0	0
CTD-2616J11.10	0	0	0	0	0	0	0	1	0	0	0	0	0	0	0	0	0
CTD-2616J11.11	0	0	0	0	0	0	0	1	0	0	0	0	0	0	0	0	0
CTD-2616J11.2	0	0	0	0	0	0	0	1	0	0	0	0	0	0	0	0	0
CTD-2616J11.3	0	0	0	0	0	0	0	1	0	0	0	0	0	0	0	0	0
CTD-2631K10.1	0	0	0	0	0	0	1	0	0	0	0	0	0	0	0	0	0
CTD-2639E6.4	0	0	0	0	0	0	0	0	0	1	0	0	0	0	0	0	0
CTD-2639E6.9	1	0	0	0	0	0	0	0	0	1	0	0	0	0	0	0	0
CTD-2659N19.2	0	0	0	0	0	0	1	0	0	0	0	0	0	0	0	0	0
CTD-3010D24.3	0	0	0	0	1	0	0	0	0	0	0	0	0	0	0	0	0
CTD-3023L14.1	1	0	0	0	0	0	0	0	0	0	0	0	0	0	0	0	0
CTD-3023L14.2	1	0	0	0	0	0	0	0	0	0	0	0	0	0	0	0	0
CTD-3023L14.3	1	0	0	0	0	0	0	0	0	0	0	0	0	0	0	0	0
CTD-3028N15.1	0	0	0	0	0	0	0	1	0	0	0	0	0	0	0	0	0
CTD-3065B20.3	0	0	0	0	0	0	0	0	0	1	0	0	0	0	0	0	0
CTD-3073N11.5	0	0	0	0	0	0	0	1	1	0	0	0	0	0	0	0	0
CTD-3073N11.7	0	0	0	0	0	0	0	1	0	0	0	0	0	0	0	0	0
CTD-3088G3.4	0	0	0	0	1	0	0	0	0	0	0	0	0	0	0	0	0
CTD-3088G3.6	0	0	0	0	0	0	0	1	0	0	0	0	0	0	0	0	0
CTD-3088G3.8	1	0	0	0	1	0	0	1	0	0	0	0	0	0	1	0	0
CTD-3094K11.1	1	0	0	0	0	0	0	0	0	0	0	0	0	0	0	0	0
CTD-3148I10.13	0	0	0	0	0	0	1	0	0	0	0	0	0	0	0	0	0
CTD-3148I10.15	0	0	0	0	0	0	0	1	1	0	0	0	0	0	0	0	0
CTD-3154N5.1	1	0	0	0	0	0	0	0	0	0	0	0	0	0	0	0	0
CTD-3184A7.4	1	0	1	0	0	0	0	0	0	0	0	0	0	0	0	0	0
CTD-3193O13.1	0	0	0	0	0	0	1	0	0	0	0	0	0	0	0	0	0
CTD-3193O13.13	0	0	0	0	0	0	1	0	0	0	0	0	0	0	0	0	0
CTDSP1	1	0	1	1	0	0	0	1	1	0	1	1	0	0	0	0	0
CTDSP2	0	0	0	1	0	0	1	1	1	0	0	0	0	0	0	0	0
CTF1	0	0	0	0	0	0	0	0	0	0	1	1	0	0	0	0	0
CTIF	1	0	0	0	1	0	0	0	0	0	0	0	0	0	0	0	0
CTLA4	1	1	1	1	1	1	1	1	1	0	1	1	0	0	0	0	1
CTNNAL1	0	0	0	0	0	0	1	0	0	0	0	0	0	0	0	0	0
CTNNBL1	0	0	0	0	0	0	0	0	0	0	0	0	0	0	0	0	1
CTPS1	0	0	0	0	0	0	0	0	0	0	0	0	0	0	0	0	1
CTRB1	0	1	0	0	1	0	0	0	0	0	0	0	0	0	0	0	0
CTRB2	1	0	0	0	0	0	0	0	0	0	0	0	0	0	0	0	0
CTSB	0	0	0	1	0	0	1	1	1	0	0	0	0	0	0	0	0
CTSC	0	0	0	0	0	0	0	0	0	0	0	0	0	0	0	0	1
CTSD	1	0	1	0	0	0	0	0	0	0	0	0	0	0	0	0	0
CTSH	0	0	0	0	1	0	0	0	0	1	0	0	0	0	0	0	0
CTSW	1	0	0	0	0	1	0	0	0	1	1	1	0	0	0	0	0
CTU1	0	0	0	0	0	0	0	1	0	0	0	0	0	0	0	0	0
CUEDC2	1	0	1	0	0	0	0	1	0	0	0	0	0	0	0	0	0
CUL1	0	0	0	1	0	0	0	1	1	0	0	0	0	0	0	0	0
CUL2	1	0	1	1	0	0	1	1	1	0	1	1	0	0	0	0	0
CWC22	0	0	0	1	0	0	0	1	1	0	0	0	0	0	0	0	0
CWC27	0	0	0	0	0	0	1	0	0	0	0	0	0	0	0	0	0
CWF19L2	0	0	0	0	0	0	1	0	0	0	0	0	0	0	0	0	0
CX3CL1	0	0	0	0	0	0	0	1	0	0	0	0	0	0	0	0	0
CXCR1	0	0	0	0	0	0	0	1	0	0	1	1	0	0	0	0	0
CXCR2	0	0	0	0	0	0	0	1	0	0	1	1	0	0	0	0	1
CXCR4	0	0	0	0	0	0	0	0	0	0	0	0	0	0	0	0	1
CXCR5	1	1	0	1	1	0	1	1	1	0	1	1	0	0	0	0	0
CXCR6	0	0	0	1	0	0	0	1	1	0	0	0	0	0	0	0	0
CYB561A3	0	0	0	1	0	0	1	1	1	0	0	0	0	0	0	0	0
CYB5RL	0	0	0	0	0	0	1	0	0	0	0	0	0	0	0	0	0
CYBA	0	0	0	0	0	0	0	0	0	0	0	0	0	0	0	0	1
CYBB	0	0	0	0	0	0	0	0	0	0	0	0	0	0	0	0	1
CYBC1	0	0	0	0	0	0	0	0	0	0	0	0	0	0	0	0	1
CYCS	0	0	0	1	0	0	1	1	1	0	0	0	0	0	0	0	0
CYFIP2	0	0	0	0	0	0	1	0	0	0	0	0	0	0	0	0	0
CYLD	1	0	0	1	0	0	0	1	1	1	0	0	0	0	0	0	0
CYP11A1	1	0	0	1	0	0	0	1	1	0	0	0	0	0	0	0	0
CYP1A1	0	1	0	0	0	0	0	0	0	0	1	1	0	0	0	0	0
CYP1A2	0	0	0	1	0	0	0	1	1	0	0	0	0	0	0	0	0
CYP20A1	1	0	0	1	0	0	1	1	1	0	0	0	0	0	0	0	0
CYP21A2	0	0	0	0	0	0	0	1	1	1	0	0	0	0	0	0	0
CYP24A1	0	0	0	0	1	0	0	1	0	0	0	0	0	0	0	0	0
CYP27B1	1	0	1	1	0	0	1	1	1	0	0	0	0	0	0	0	0
CYP51A1	0	0	0	0	0	0	1	0	0	0	0	0	0	0	0	0	0
CYR61	0	0	0	0	0	0	0	1	0	0	0	0	0	0	0	0	0
CYTH2	1	0	0	0	0	0	0	1	1	0	0	0	1	0	0	0	0
CYTH4	0	0	0	1	0	0	0	1	1	1	1	1	0	0	0	0	0
CYTIP	0	0	0	0	0	0	1	0	0	0	0	0	0	0	0	0	0
D2HGDH	1	0	0	0	0	0	0	0	0	1	1	0	0	0	0	0	0
DAB2	0	0	0	0	0	0	0	1	0	0	0	0	0	0	0	0	0
DACT1	0	0	0	0	0	0	1	0	0	0	0	0	0	0	0	0	0
DACT3	0	0	0	1	0	0	0	1	1	0	0	0	0	0	0	0	0
DACT3-AS1	0	0	0	0	0	0	0	1	1	0	0	0	0	0	0	0	0
DAG1	0	0	0	0	0	1	0	1	0	0	0	0	0	0	0	0	0
DAGLA	0	0	0	0	0	0	1	0	0	0	0	0	0	0	0	0	0
DAGLB	1	1	0	0	0	0	0	0	0	1	1	1	0	1	0	0	0
DAK	0	0	0	1	0	0	1	1	1	0	0	0	0	0	0	0	0
DAP	0	1	0	1	0	0	0	1	1	1	1	1	0	0	0	0	0
DAPP1	0	0	0	0	0	0	0	1	0	0	0	0	0	0	0	0	0
DARS	0	0	0	0	0	0	1	0	0	0	0	0	0	0	0	0	0
DARS2	1	0	1	1	0	0	1	1	1	0	0	0	0	0	0	0	0
DAZAP1	0	0	0	0	0	0	1	0	0	0	0	0	0	0	0	0	0
DAZL	0	0	0	1	0	0	0	1	1	0	0	0	0	0	0	0	0
DBN1	1	0	1	1	0	0	1	1	1	0	0	0	0	0	0	0	0
DBP	1	1	1	0	0	0	0	1	1	0	1	1	0	0	0	0	0
DBR1	0	0	0	0	0	0	0	0	0	0	0	0	0	0	0	0	1
DCAF8	0	0	0	1	0	0	1	1	1	0	0	0	0	0	0	0	0
DCLRE1B	0	0	0	1	0	0	0	1	1	0	0	0	0	0	0	0	0
DCLRE1C	0	0	0	0	0	0	0	0	0	0	0	0	0	0	0	0	1
DCP1B	0	0	0	0	0	0	1	0	0	0	0	0	0	0	0	0	0
DCP2	0	0	0	0	0	0	1	0	0	0	0	0	0	0	0	0	0
DCPS	0	0	0	0	0	0	0	1	0	0	0	0	0	0	0	0	0
DCTN2	0	0	0	0	0	0	1	1	1	0	0	0	0	0	0	0	0
DCTN4	1	0	1	0	0	0	0	0	0	0	0	0	0	0	0	0	0
DCTPP1	0	0	0	0	0	0	0	1	1	0	0	0	0	0	0	0	0
DCUN1D5	0	0	0	0	0	0	1	0	0	0	0	0	0	0	0	0	0
DDA1	0	0	0	0	1	0	0	0	0	0	0	0	0	0	0	0	0
DDAH2	0	0	0	0	0	0	0	1	0	0	0	0	0	0	0	0	0
DDB1	0	0	0	1	0	0	1	1	1	0	0	0	0	0	0	0	0
DDB2	0	0	0	0	0	0	0	0	0	1	0	0	0	0	0	0	0
DDC	1	0	0	1	0	0	0	1	1	0	0	0	0	0	0	0	0
DDC-AS1	0	0	0	0	0	0	0	0	0	0	0	1	0	0	0	0	0
DDC8	0	0	0	1	0	0	0	1	1	0	0	0	0	0	0	0	0
DDHD1	0	0	0	0	0	0	1	0	0	0	0	0	0	0	0	0	0
DDIT3	0	0	0	0	0	0	0	1	0	0	0	0	0	0	0	0	0
DDN	0	0	0	0	0	0	1	0	0	0	0	0	0	0	0	0	0
DDX1	0	0	0	0	0	0	1	0	0	0	0	0	0	0	0	0	0
DDX10	0	0	0	0	0	0	1	0	0	0	0	0	0	0	0	0	0
DDX18	0	0	0	0	0	0	1	0	0	0	0	0	0	0	0	0	0
DDX23	0	0	0	0	0	0	0	1	0	0	0	0	0	0	0	0	0
DDX27	0	0	0	0	0	0	0	1	0	0	0	0	0	0	0	0	0
DDX39B	1	1	0	0	0	0	1	1	1	1	0	0	0	0	1	0	0
DDX39B-AS1	1	1	0	0	0	0	0	1	1	1	0	0	0	0	1	0	0
DDX41	1	0	1	1	0	0	1	1	1	0	0	0	0	0	0	0	0
DDX46	0	0	0	0	0	0	0	1	1	0	0	0	0	0	0	0	0
DDX49	0	0	0	0	0	0	0	1	0	0	0	0	0	0	0	0	0
DDX54	0	0	0	0	0	0	1	0	0	0	0	0	0	0	0	0	0
DDX55	1	0	1	1	0	0	0	1	1	0	0	0	0	0	0	0	0
DDX58	0	0	0	0	1	0	0	1	1	0	0	0	0	0	0	0	0
DDX6	1	1	0	1	0	0	1	1	1	0	1	1	0	0	0	0	0
DEDD	0	0	0	0	0	0	0	1	1	0	0	0	0	0	0	0	0
DEF6	0	0	0	0	0	0	0	0	0	0	0	0	0	0	0	0	1
DEF8	0	0	0	0	1	0	0	0	0	0	0	0	0	0	0	0	0
DEFB134	0	0	0	1	0	0	0	1	1	0	0	0	0	0	0	0	0
DEFB135	0	0	0	1	0	0	1	1	1	0	0	0	0	0	0	0	0
DEFB136	0	0	0	1	0	0	1	1	1	0	0	0	0	0	0	0	0
DENND1B	0	0	0	0	1	0	1	1	0	0	0	0	0	0	0	0	0
DENND4B	0	0	0	0	0	0	1	0	0	0	0	0	0	0	0	0	0
DENR	0	0	0	0	0	0	0	1	0	0	0	0	0	0	0	0	0
DERL2	0	0	0	0	0	0	0	0	0	1	0	0	0	0	0	0	0
DESI1	0	0	0	0	0	0	0	0	0	1	1	1	0	0	0	0	0
DEXI	1	0	1	1	0	0	1	1	1	0	1	1	0	0	0	0	0
DGKA	1	0	1	1	0	0	1	1	1	0	0	0	0	0	0	0	0
DGKD	1	0	1	0	0	0	0	1	0	0	1	0	0	0	0	0	0
DGKE	0	1	0	1	0	0	0	1	1	1	0	0	0	1	0	0	0
DGKH	0	0	0	0	0	0	0	1	0	0	0	0	0	0	0	0	0
DGKQ	1	1	0	0	1	0	0	0	0	1	0	0	0	0	0	0	0
DHFRL1	0	0	0	1	0	0	0	1	1	0	0	0	0	0	0	0	0
DHFRP2	0	0	0	0	0	0	0	1	0	1	0	0	0	0	0	0	0
DHH	0	0	0	1	0	0	0	1	1	0	0	0	0	0	0	0	0
DHRS7	0	0	0	0	0	0	1	0	0	0	0	0	0	0	0	0	0
DHX16	0	0	0	1	0	0	0	1	1	0	0	0	0	0	0	0	0
DHX29	0	0	0	0	0	0	1	0	0	0	0	0	0	0	0	0	0
DHX37	0	0	0	0	0	0	1	1	0	0	0	0	0	0	0	0	0
DHX58	0	0	0	0	0	1	0	0	0	1	0	0	0	0	0	1	0
DIAPH1	0	0	0	1	1	0	0	1	1	0	0	0	0	0	0	0	1
DIEXF	0	1	0	1	0	0	0	1	1	1	0	0	0	0	0	0	0
DIMT1	0	0	0	0	0	0	1	0	0	0	0	0	0	0	0	0	0
DIO3	0	0	0	1	0	0	0	1	1	0	0	0	0	0	0	0	0
DIO3OS	0	0	0	0	0	0	0	1	1	0	0	0	0	0	0	0	0
DIRC3	0	0	0	0	0	0	0	0	0	0	1	1	0	0	0	0	0
DIS3	0	0	0	0	0	0	0	1	0	0	0	0	0	0	0	0	0
DISP2	0	0	0	0	0	0	1	0	0	0	0	0	0	0	0	0	0
DIXDC1	0	0	0	1	0	0	0	1	1	1	0	0	0	0	0	0	0
DKC1	0	0	0	0	0	0	0	0	0	0	0	0	0	0	0	0	1
DKFZP667F0711	1	0	1	1	1	0	0	1	1	0	0	0	0	0	0	0	0
DKKL1	0	0	0	1	1	0	0	1	1	1	0	0	0	0	0	0	0
DLAT	0	0	0	1	0	0	0	1	1	0	0	0	0	0	0	0	0
DLEU1	0	1	0	1	1	0	0	1	1	0	0	0	0	0	0	0	0
DLEU2	0	0	0	0	0	0	0	1	1	0	0	0	0	0	0	0	0
DLEU7	0	0	0	0	0	0	0	0	0	1	0	0	0	0	0	0	0
DLL1	0	0	0	0	0	0	0	1	0	0	0	0	0	0	0	0	0
DMXL1	1	0	0	1	0	0	1	1	1	0	0	1	0	0	0	0	0
DNAH12	0	0	0	0	0	0	1	0	0	0	0	0	0	0	0	0	0
DNAJA1	0	0	0	1	0	0	0	1	1	0	0	0	0	0	0	0	0
DNAJB14	1	0	0	0	0	0	1	1	0	0	0	0	0	0	0	0	0
DNAJB2	0	0	0	0	0	0	0	1	0	0	0	0	0	0	0	0	0
DNAJB6	0	0	0	0	0	0	1	0	0	0	0	0	0	0	0	0	0
DNAJB7	0	0	0	0	0	0	0	1	0	0	0	0	0	0	0	0	0
DNAJC10	0	0	0	0	0	0	0	1	0	0	0	0	0	0	0	0	0
DNAJC14	1	0	1	1	0	0	1	1	1	0	0	0	0	0	0	0	0
DNAJC15	0	0	0	1	0	0	0	1	1	0	0	0	0	0	0	0	0
DNAJC2	0	0	0	0	0	0	1	0	0	0	0	0	0	0	0	0	0
DNAJC21	1	0	1	1	0	0	1	1	1	0	1	0	0	0	0	0	1
DNAJC27	0	1	0	0	0	0	0	0	0	0	1	1	0	0	0	0	0
DNAJC27-AS1	0	1	0	0	0	0	0	0	0	0	1	1	0	0	0	0	0
DNAJC28	1	1	0	0	0	0	1	0	0	0	0	0	0	0	0	0	0
DNAJC4	1	0	1	0	0	0	0	0	0	0	0	0	0	0	0	0	0
DNAJC5	1	0	0	0	0	0	0	1	1	0	0	0	0	0	0	0	0
DNAJC7	0	0	0	1	0	0	0	1	1	0	0	0	0	0	0	0	0
DNAJC8P1	0	0	0	0	0	0	1	0	0	0	0	0	0	0	0	0	0
DNAJC9-AS1	0	0	0	0	0	0	0	0	0	1	0	0	0	0	0	0	0
DNASE1L3	0	0	0	0	0	0	0	1	0	0	0	0	0	0	0	0	1
DNASE2	0	0	0	0	0	0	0	0	0	0	0	0	0	0	0	0	1
DND1P1	0	0	0	0	0	0	0	0	0	1	0	0	0	0	0	0	0
DNER	0	0	0	1	0	0	0	1	1	0	0	0	0	0	0	0	0
DNLZ	1	0	1	0	0	0	0	1	0	0	0	0	0	0	0	0	0
DNM1P35	0	0	0	0	0	0	0	0	0	0	1	0	0	0	0	0	0
DNM2	1	0	0	0	0	0	1	1	0	0	1	1	0	0	0	0	0
DNMT1	0	0	0	0	0	0	1	1	0	0	0	0	0	0	0	0	0
DNMT3A	1	0	1	0	0	0	0	0	0	0	0	0	0	0	0	0	0
DNMT3B	0	0	0	0	0	0	0	0	0	0	0	0	0	0	0	0	1
DNPEP	0	0	0	0	0	0	1	0	0	0	0	0	0	0	0	0	0
DNTTIP1	1	0	1	0	0	0	1	0	0	0	0	0	0	0	0	0	0
DOCK2	0	0	0	0	0	0	0	0	0	0	0	0	0	0	0	0	1
DOCK8	0	0	0	0	0	0	0	0	0	0	0	0	0	0	0	0	1
DOCK9	1	0	1	1	0	0	0	1	1	0	0	0	0	0	0	0	0
DOCK9-AS1	1	0	0	0	0	0	0	0	0	0	0	0	0	0	0	0	0
DOCK9-AS2	1	0	1	0	0	0	0	1	1	0	0	0	0	0	0	0	0
DOK3	1	0	1	1	0	0	1	1	1	0	0	0	0	0	0	0	0
DOK4	0	0	0	0	0	0	0	0	0	1	0	0	0	0	0	0	0
DOK6	0	0	0	0	0	0	0	0	0	1	0	0	0	0	0	0	0
DOLK	1	0	1	0	0	0	0	1	0	0	0	0	0	0	0	0	0
DONSON	1	0	1	0	0	0	1	0	0	0	0	0	0	0	0	0	0
DPAGT1	1	0	1	1	0	0	1	1	1	0	0	0	0	0	0	0	0
DPH6	0	0	0	0	0	0	1	0	0	0	0	0	0	0	0	0	0
DPH6-AS1	0	0	0	0	0	0	1	0	0	0	0	0	0	0	0	0	0
DPM1	0	0	0	0	0	0	0	0	0	0	0	1	0	0	0	0	0
DPM3	1	0	0	1	0	0	1	1	1	0	0	0	0	0	0	0	0
DPRX	0	0	0	1	0	0	0	1	1	0	0	0	0	0	0	0	0
DPY19L1	0	0	0	0	0	0	1	0	0	0	0	0	0	0	0	0	0
DPY30	0	0	0	0	0	0	1	0	0	0	0	0	0	0	0	0	0
DPYSL4	0	0	0	0	0	0	1	0	0	0	0	0	0	0	0	0	0
DRAP1	1	0	1	0	0	0	0	0	0	0	0	0	0	0	0	0	0
DRD4	0	0	0	1	0	0	0	1	1	0	0	0	0	0	0	0	0
DSEL	0	0	0	0	0	0	0	1	1	0	0	0	0	0	0	0	0
DST	0	0	0	0	0	0	1	0	0	0	0	0	0	0	0	0	0
DTD2	0	0	0	0	0	0	1	0	0	0	0	0	0	0	0	0	0
DTNB	1	0	0	0	0	0	1	0	0	0	0	0	0	0	0	0	0
DTNBP1	0	0	0	0	0	0	0	0	0	0	0	1	0	0	0	0	0
DTWD2	1	0	1	1	0	0	1	1	1	0	1	1	0	0	1	0	0
DTX1	0	0	0	0	0	0	1	0	0	0	0	0	0	0	0	0	0
DTX3	0	0	0	1	0	0	0	1	1	0	0	0	0	0	0	0	0
DTYMK	1	0	1	0	0	0	0	0	0	1	1	0	0	0	0	0	0
DUS1L	0	0	0	0	0	0	1	0	0	0	0	0	0	0	0	0	0
DUSP1	1	0	0	1	0	0	0	1	1	0	0	1	0	0	0	0	0
DUSP12	0	0	0	1	0	0	1	1	1	1	0	0	0	0	0	0	0
DUSP13	1	0	0	0	0	0	0	0	0	0	0	0	0	0	0	0	0
DUSP15	0	0	0	0	0	0	0	1	0	0	0	0	0	0	0	0	0
DUSP22	1	0	1	1	0	0	1	1	1	0	0	0	0	0	0	0	0
DUSP27	1	0	0	0	0	0	0	1	1	0	0	0	0	0	0	0	0
DUSP5	1	1	1	1	0	0	1	1	1	1	1	1	0	0	0	0	0
DVL1	1	0	1	0	0	0	1	1	0	0	0	0	0	0	0	0	0
DXO	1	0	0	1	0	0	0	1	1	0	0	0	0	0	0	0	0
DYDC1	0	0	0	0	0	0	1	1	0	0	1	0	0	0	0	0	0
DYDC2	0	0	0	0	0	0	1	1	0	0	0	0	0	0	0	0	0
DYM	0	0	0	0	0	0	0	1	1	0	0	0	0	0	0	0	0
DYNLT1	1	0	0	1	0	0	1	1	1	0	0	0	0	0	0	0	0
DYRK2	0	0	0	1	0	0	0	1	1	0	0	0	0	0	0	0	0
E2F3	0	0	0	0	0	0	1	0	0	0	0	0	0	0	0	0	0
EAF2	0	0	0	0	0	1	0	0	0	1	0	0	0	0	0	0	0
EAPP	0	0	0	1	0	0	1	1	1	0	0	0	0	0	0	0	0
ECM1	0	0	0	0	0	0	0	1	0	0	0	0	0	0	0	0	0
EDC3	1	1	1	0	0	0	0	1	0	0	1	1	0	0	0	0	0
EDN3	0	0	0	0	1	0	0	0	0	1	0	0	0	0	0	0	0
EDRF1	0	0	0	1	0	0	0	1	1	0	0	0	0	0	0	0	0
EEF1A1	0	0	0	0	0	0	1	0	0	0	0	0	0	0	0	0	0
EEF1A1P27	0	0	0	0	1	0	0	0	0	0	0	0	0	0	0	0	0
EEF1G	0	0	0	0	0	0	1	0	0	0	0	0	0	0	0	0	0
EEPD1	0	0	0	0	0	0	0	0	0	0	1	1	0	0	0	0	0
EFCAB11	0	0	0	0	0	0	1	0	0	0	0	0	0	0	0	0	0
EFCAB13	0	0	0	0	0	0	0	0	0	1	0	0	0	0	1	0	0
EFEMP2	1	0	0	0	0	0	0	0	0	1	1	1	0	0	0	0	0
EFHB	0	0	0	0	0	0	0	0	0	0	0	1	0	0	0	0	0
EFHD1	1	0	0	1	0	0	0	1	1	1	0	0	0	0	0	0	0
EFL1	0	0	0	0	0	0	0	0	0	0	0	0	0	0	0	0	1
EFNA1	0	1	0	0	0	0	0	0	0	0	0	0	0	0	0	0	0
EFNA3	1	0	0	0	0	0	1	1	0	0	0	0	0	0	0	0	0
EFNA4	1	0	0	0	0	0	0	1	0	0	1	0	0	0	0	0	0
EFR3B	1	0	1	0	0	0	0	1	0	0	1	0	0	0	0	0	0
EGFL7	0	0	0	0	0	0	0	1	0	0	0	0	0	0	0	0	0
EGFLAM	0	0	0	0	0	0	0	1	0	0	0	0	0	0	0	0	0
EGFLAM-AS1	0	0	0	0	0	0	0	1	1	0	0	0	0	0	0	0	0
EGFLAM-AS2	0	0	0	0	0	0	0	1	0	0	0	0	0	0	0	0	0
EGFLAM-AS3	0	0	0	0	0	0	0	1	0	0	0	0	0	0	0	0	0
EGLN3	0	0	0	0	0	0	0	1	0	0	0	0	0	0	0	0	0
EGOT	0	0	0	0	0	0	1	0	0	0	0	0	0	0	0	0	0
EGR2	1	0	1	1	0	0	1	1	1	0	1	1	0	0	0	0	0
EHBP1	0	0	0	0	0	0	1	0	0	0	0	0	0	0	0	0	0
EHBP1L1	0	0	0	0	0	0	0	1	0	0	0	0	0	0	0	0	0
EHMT2	1	0	1	1	0	0	1	1	1	1	0	0	0	0	0	0	0
EHMT2-AS1	1	0	0	0	0	0	0	1	1	1	0	0	0	0	0	0	0
EIF1	1	0	1	1	0	0	1	1	1	0	0	0	1	0	0	0	0
EIF1AD	1	0	1	1	0	0	0	1	1	0	0	0	0	0	0	0	0
EIF1B	0	0	0	0	0	0	1	0	0	0	0	0	0	0	0	0	0
EIF2AK1	0	0	0	1	0	0	0	1	1	0	0	0	0	0	0	0	0
EIF2AK4	0	0	0	0	0	0	1	0	0	0	0	0	0	0	0	0	0
EIF2B1	0	0	0	1	0	0	0	1	1	0	0	0	0	0	0	0	0
EIF2B4	1	0	1	0	0	0	0	1	1	0	0	0	0	0	0	0	0
EIF2S1	0	0	0	0	0	0	1	0	0	0	0	0	0	0	0	0	0
EIF2S2P3	0	0	0	0	1	0	0	0	0	0	0	0	0	0	0	0	0
EIF3D	0	0	0	0	0	0	1	0	0	0	0	0	0	0	0	0	0
EIF3F	0	0	0	0	0	0	1	0	0	0	0	0	0	0	0	0	0
EIF3FP3	0	0	0	0	0	0	1	0	0	0	0	0	0	0	0	0	0
EIF3G	0	0	0	1	0	0	1	1	1	0	0	0	0	0	0	0	0
EIF3KP1	0	0	0	0	0	0	0	0	0	1	0	0	0	0	0	0	0
EIF3M	0	0	0	0	0	0	1	0	0	0	0	0	0	0	0	0	0
EIF4A1	0	0	0	0	0	0	1	0	0	0	0	0	0	0	0	0	0
EIF4E	0	0	0	0	0	0	1	0	0	0	0	0	0	0	0	0	0
EIF4E2	0	0	0	0	0	0	0	1	0	1	1	0	0	0	0	0	0
EIF5AP4	0	0	0	0	0	0	0	0	0	1	0	0	0	0	0	0	0
EIF5B	0	0	0	0	0	0	1	0	0	0	0	0	0	0	0	0	0
ELANE	1	0	0	0	0	0	0	1	0	0	0	0	0	0	0	0	1
ELF4	0	0	0	0	0	0	0	0	0	0	0	0	0	0	0	0	1
ELFN2	0	0	0	1	0	0	0	1	1	0	0	0	0	0	0	0	0
ELL	0	0	0	1	0	0	0	1	1	0	0	0	0	0	0	0	0
ELL2	0	0	0	0	0	0	1	0	0	0	0	0	0	0	0	0	0
ELMO1	1	1	1	1	1	1	0	1	1	1	1	0	0	0	0	0	0
ELMO1-AS1	0	0	0	0	0	0	0	0	0	0	1	0	0	0	0	0	0
ELMO2	1	0	0	1	0	0	1	1	1	0	0	0	0	0	0	0	0
ELOVL3	1	0	0	1	0	0	0	1	1	0	0	0	0	0	0	0	0
ELOVL5	0	0	0	0	0	0	1	0	0	0	0	0	0	0	0	0	0
ELP3	0	1	0	0	1	0	0	0	0	1	0	0	0	0	0	0	0
ELP4	0	0	0	0	0	0	1	0	0	0	0	0	0	0	0	0	0
EMC1	0	0	0	0	0	0	0	1	0	0	0	0	0	0	0	0	0
EMC4	0	0	0	0	0	0	1	0	0	0	0	0	0	0	0	0	0
EMC7	0	0	0	0	0	0	1	0	0	0	0	0	0	0	0	0	0
EMC8	0	0	0	1	0	0	1	1	1	0	0	0	0	0	0	0	0
EMG1	0	0	0	1	0	0	1	1	1	0	0	0	0	0	0	0	0
EMILIN1	0	0	0	0	0	0	1	1	0	0	0	0	0	0	0	0	0
EML3	0	0	0	0	0	0	1	0	0	0	0	0	0	0	0	0	0
EML4	0	0	0	1	0	0	0	1	1	0	0	0	0	0	0	0	0
EML5	0	0	0	0	0	0	1	0	0	0	1	1	0	0	0	0	0
EML6	0	0	0	0	0	0	1	0	0	0	0	0	0	0	0	0	0
EMP3	1	0	1	1	0	0	0	1	1	0	0	0	0	0	0	0	0
ENDOD1	1	0	1	0	0	0	0	0	0	0	0	0	0	0	0	0	0
ENDOG	0	1	0	0	0	1	0	0	0	0	0	0	0	0	0	0	0
ENDOU	1	0	0	0	0	0	0	1	0	0	0	1	0	0	0	0	0
ENKUR	0	0	0	0	0	0	0	1	1	0	0	0	0	0	0	0	0
ENO1	1	0	1	0	0	0	0	0	0	0	0	0	0	0	0	0	0
ENO1-AS1	1	0	0	0	0	0	1	0	0	0	0	0	0	0	0	0	0
ENO1-IT1	1	0	1	0	0	0	1	0	0	0	0	0	0	0	0	0	0
ENO1P4	0	0	0	0	0	0	0	1	0	0	0	0	0	0	0	0	0
ENO3	0	0	0	0	0	0	0	1	0	0	0	0	0	0	0	0	0
ENOX1	0	1	0	0	0	0	0	0	0	0	0	1	0	0	0	0	0
ENTPD1-AS1	0	0	0	0	0	0	1	0	0	0	0	0	0	0	0	0	0
ENTPD7	0	0	0	0	0	0	1	1	0	0	0	0	0	0	0	0	0
ENTPD8	0	0	0	0	0	0	0	1	0	0	0	0	0	0	0	0	0
EOMES	1	1	1	1	1	0	0	1	1	0	0	0	0	0	0	0	0
EP300-AS1	0	0	0	0	0	0	0	0	0	0	0	1	0	0	0	0	0
EP400	0	0	0	0	0	0	1	0	0	0	0	0	0	0	0	0	0
EP400NL	0	0	0	0	0	0	1	0	0	0	0	0	0	0	0	0	0
EPB41L4A-AS1	0	0	0	0	0	0	0	1	0	0	0	0	0	0	0	0	0
EPC1	0	0	0	0	0	0	0	1	0	0	0	0	0	0	0	0	0
EPDR1	0	0	0	0	0	0	0	0	0	0	1	1	0	0	0	0	0
EPG5	0	0	0	0	0	0	0	0	0	0	0	0	0	0	0	0	1
EPHX4	0	0	0	1	0	0	0	1	1	0	0	0	0	0	0	0	0
EPM2AIP1	0	0	0	0	0	0	0	1	1	0	0	0	0	0	0	0	0
EPRS	0	0	0	1	0	0	0	1	1	0	0	0	0	0	0	0	0
EPSTI1	1	0	1	1	0	0	0	1	1	0	0	0	0	0	1	0	0
ERAL1	0	0	0	0	0	0	1	0	0	0	0	0	0	0	0	0	0
ERAP1	1	0	0	1	1	1	1	1	1	1	0	0	0	0	0	0	0
ERAP2	1	1	0	1	1	1	1	1	1	1	1	1	0	1	0	0	0
ERBB2	1	0	0	1	0	0	1	1	1	0	0	0	0	0	0	0	0
ERBB2IP	0	0	0	0	0	0	1	0	0	0	0	0	0	0	0	0	1
ERBB3	1	1	1	1	0	0	1	1	1	1	0	0	0	0	0	0	0
ERCC2	0	0	0	0	0	0	0	0	0	0	0	0	1	0	0	0	0
ERCC4	0	0	0	0	0	0	0	0	0	0	0	0	0	0	0	0	1
ERCC6	0	0	0	0	0	0	0	1	0	0	0	0	0	0	0	0	0
ERCC6-PGBD3	0	0	0	0	0	0	0	1	0	0	0	0	0	0	0	0	0
ERCC6L2	0	0	0	0	0	0	0	0	0	0	0	0	0	0	0	0	1
ERG	0	0	0	0	0	0	0	1	0	0	0	0	0	0	0	0	0
ERGIC1	1	0	1	0	1	0	0	1	0	0	1	1	0	0	0	0	0
ERH	0	0	0	1	0	0	1	1	1	0	0	0	1	0	0	0	0
ERHP1	0	0	0	0	0	0	0	1	0	0	0	0	0	0	0	0	0
ERI1	1	0	1	1	0	0	1	1	1	1	0	0	0	0	0	0	0
ERLEC1	1	0	0	1	0	0	0	1	1	0	0	0	0	0	0	0	0
ERLIN2	0	0	0	0	0	0	1	0	0	0	0	0	0	0	0	0	0
ERN2	0	0	0	0	0	0	0	0	0	1	0	0	0	0	0	0	0
ERP29	0	0	0	0	0	0	1	0	0	0	0	0	0	0	0	0	0
ERRFI1	0	0	0	0	0	0	1	1	1	0	0	0	0	0	0	0	0
ERVH48-1	1	0	1	0	0	0	0	0	0	0	0	0	0	0	0	0	0
ESRRA	1	0	1	0	0	0	0	1	0	0	0	0	0	0	0	0	0
ESYT1	1	0	1	1	0	0	1	1	1	0	0	0	0	0	0	0	0
ETFB	0	0	0	0	0	0	0	1	0	0	0	0	0	0	0	0	0
ETS1	1	1	1	1	1	1	1	1	1	0	1	1	0	0	1	0	0
ETS2	0	0	0	0	0	0	0	1	0	0	0	0	0	0	0	0	0
ETV7	0	1	0	0	1	1	0	0	0	1	1	1	0	0	0	0	0
EVX1	0	0	0	0	0	0	1	0	0	0	0	0	0	0	0	0	0
EVX1-AS	0	0	0	0	0	0	1	0	0	0	0	0	0	0	0	0	0
EXOC5	0	0	0	0	0	0	1	0	0	0	0	0	0	0	0	0	0
EXOC6	0	0	0	0	0	0	1	1	0	0	0	0	0	0	0	0	0
EXOG	0	0	0	0	0	0	1	0	0	0	0	0	0	0	0	0	0
EXOSC8	0	0	0	0	0	0	1	1	0	0	0	0	0	0	0	0	0
EXOSC9	1	0	1	0	0	0	0	0	0	0	0	0	0	0	0	0	0
EXTL3	0	0	0	0	0	0	0	0	0	0	0	0	0	0	0	0	1
EZH2	0	0	0	1	0	0	0	1	1	0	0	0	0	0	0	0	0
EZR	0	0	0	0	0	0	1	0	0	1	0	0	0	0	0	0	0
EZR-AS1	0	0	0	0	0	0	1	0	0	0	0	0	0	0	0	0	0
F11R	1	0	0	0	0	0	0	0	0	0	0	1	0	0	0	0	0
F12	1	0	1	1	0	0	0	1	1	0	0	0	0	0	0	0	0
FAAP24	0	0	0	0	0	0	0	0	0	0	0	0	0	0	0	0	1
FABP3P2	0	0	0	0	1	0	0	0	0	0	0	0	0	0	0	0	0
FADD	0	0	0	0	0	0	0	0	0	0	0	0	0	0	0	0	1
FADS1	1	1	1	0	0	1	1	1	0	1	1	1	1	1	0	0	0
FADS2	1	1	1	0	1	1	1	1	0	1	1	1	1	1	0	1	0
FADS3	1	1	0	0	0	0	1	1	1	1	0	0	0	0	0	0	0
FADS6	0	0	0	0	0	0	0	0	0	1	0	0	0	0	0	0	0
FAF2	0	0	0	0	0	0	0	1	0	0	0	0	0	0	0	0	0
FAIM3	1	0	1	1	0	0	1	1	1	0	0	0	0	0	0	0	0
FAM105A	0	0	0	0	1	0	1	1	0	0	0	0	0	0	0	0	0
FAM107A	0	0	0	1	0	0	1	1	1	0	0	0	0	0	0	0	0
FAM107B	0	0	0	0	0	0	1	0	0	0	0	0	0	0	0	0	0
FAM114A1	0	0	0	0	0	0	0	0	0	1	0	0	0	0	0	0	0
FAM117B	0	0	0	0	0	0	0	1	0	0	0	0	0	0	0	0	0
FAM120B	0	0	0	0	0	0	0	1	0	0	0	0	0	0	0	0	0
FAM126B	0	0	0	1	0	0	0	1	1	0	0	0	0	0	0	0	0
FAM132A	1	0	0	0	0	0	1	1	0	0	0	0	0	0	0	0	0
FAM134A	0	0	0	1	0	0	0	1	1	0	0	0	0	0	0	0	0
FAM134B	0	0	0	0	0	0	1	0	0	0	0	0	0	0	0	0	0
FAM136A	1	0	1	1	0	0	1	1	1	0	0	0	0	0	1	0	0
FAM13C	0	0	0	0	0	0	0	0	0	0	1	0	0	0	0	0	0
FAM161A	1	0	1	1	0	0	1	1	1	0	0	0	0	0	0	0	0
FAM162A	0	0	0	0	0	0	0	1	0	0	0	0	0	0	0	0	0
FAM167A	0	1	0	0	1	0	0	1	0	1	1	1	0	0	0	0	0
FAM168A	0	0	0	0	0	0	1	0	0	0	0	0	0	0	0	0	0
FAM168B	0	0	0	0	0	0	1	1	1	0	0	0	0	0	0	0	0
FAM172BP	0	0	0	0	1	0	0	0	0	0	1	1	0	0	0	0	0
FAM173B	1	0	1	1	0	0	1	1	1	0	0	0	0	0	0	0	0
FAM174A	1	0	1	1	0	0	1	1	1	0	0	0	0	0	0	0	0
FAM175B	1	0	1	0	0	0	0	0	0	0	0	0	0	0	0	0	0
FAM177A1	1	1	0	0	1	0	1	1	1	0	0	0	0	0	0	0	0
FAM179B	0	0	0	0	0	0	1	1	0	0	0	0	0	0	0	0	0
FAM188A	0	0	0	0	0	0	1	0	0	0	0	0	0	0	0	0	0
FAM193B	1	0	0	0	0	0	1	0	0	0	0	0	0	0	0	0	0
FAM19A2	0	0	0	0	0	0	1	1	0	0	0	0	0	0	0	0	0
FAM206A	0	0	0	0	0	0	0	0	0	1	0	0	0	0	0	0	0
FAM208B	0	0	0	0	0	0	0	1	0	0	0	0	0	0	0	0	0
FAM210A	0	0	0	0	0	0	0	1	1	0	0	0	0	0	0	0	0
FAM212A	0	0	0	0	0	0	1	0	0	0	0	0	0	0	0	0	0
FAM213A	1	1	1	1	0	0	1	1	1	1	1	0	0	0	0	0	0
FAM213B	1	0	1	1	0	0	0	1	1	1	1	1	0	0	0	0	0
FAM216B	0	0	0	0	0	0	0	1	0	0	0	0	0	0	0	0	0
FAM217B	0	0	0	0	0	0	1	0	0	0	0	0	0	0	0	0	0
FAM219B	1	0	0	1	0	0	0	1	1	0	1	1	0	0	0	0	0
FAM220A	1	0	0	0	0	0	0	1	0	1	1	0	0	0	0	0	0
FAM222B	0	0	0	0	0	0	1	0	0	0	0	0	0	0	0	0	0
FAM228B	0	0	0	1	0	0	0	1	1	0	0	0	0	0	0	0	0
FAM229B	0	0	0	1	0	0	0	1	1	0	0	0	0	0	0	0	0
FAM35A	0	0	0	0	0	0	1	0	0	0	0	0	0	0	0	0	0
FAM3A	0	0	0	1	0	0	0	1	1	0	0	0	0	0	0	0	0
FAM47E	0	0	0	0	0	0	0	1	0	0	0	0	0	0	0	0	0
FAM50A	0	0	0	1	0	0	0	1	1	0	0	0	0	0	0	0	0
FAM53B	1	1	0	1	1	0	1	1	1	0	0	1	0	0	0	0	0
FAM53B-AS1	0	0	0	0	0	0	0	1	1	0	0	0	0	0	0	0	0
FAM53C	0	0	0	0	0	0	1	0	0	0	0	0	0	0	0	0	0
FAM58A	0	0	0	0	0	0	0	0	0	1	0	0	0	0	0	0	0
FAM64A	0	0	0	0	0	0	1	0	0	0	0	0	0	0	0	0	0
FAM65B	0	0	0	0	0	0	1	0	0	0	0	0	0	0	0	0	0
FAM69B	0	0	0	0	0	0	0	1	0	0	0	0	0	0	0	0	0
FAM83E	1	1	0	0	0	0	0	0	0	0	1	1	0	0	0	0	0
FAM84B	1	0	1	0	0	0	0	0	0	0	0	0	0	0	0	0	0
FAM86B3P	0	0	0	0	0	0	0	0	0	1	0	1	0	0	0	0	0
FAM89B	0	0	0	0	0	0	0	1	0	0	0	0	0	0	0	0	0
FAM90A27P	0	0	0	0	0	0	0	1	0	0	0	0	0	0	0	0	0
FAM98A	0	0	0	0	0	0	1	0	0	0	0	0	0	0	0	0	0
FAM98B	0	0	0	0	0	0	1	1	0	0	0	0	0	0	0	0	0
FAM99B	0	0	0	0	0	0	0	1	1	0	0	0	0	0	0	0	0
FAM9C	0	0	0	1	0	0	0	1	1	0	0	0	0	0	0	0	0
[truncated: 4,938 more rows]
