# Supplementary material for: Dynamic chromatin architecture identifies new autoimmune-associated enhancers for IL2 and novel genes regulating CD4+ T cell activation
Source: eLife. 2024 Sep 20;13:RP96852. doi: 10.7554/eLife.96852 (PMC11418197; doi:10.7554/eLife.96852)
Supplement: Supplementary file 17. [file elife-96852-supp17.xlsx]

## Sheet: motifbreakR_results
Table S17: Motifs predicted to disrupt transcription factor binding sites
seqnames	start	end	width	strand	SNP_id	REF	ALT	varType	motifPos	geneSymbol	dataSource	providerName	providerId	seqMatch	pctRef	pctAlt	scoreRef	scoreAlt	Refpvalue	Altpvalue	altPos	alleleDiff	alleleEffectSize	effect
chr21	34733260	34733260	1	+	rs117044985	G	A	SNV	c(-8, 2)	E2F1	jaspar2018	MA0024.2	MA0024.2	attgagcgggAacgttgacgg	0.779264	0.959495	8.60452	10.5931	0.00378227	3.79086e-05	1	1.98858	0.180124	strong
chr21	34733260	34733260	1	-	rs117044985	G	A	SNV	c(-13, 1)	E2F3	jaspar2018	MA0469.1	MA0469.1	ggtgattgagcgggAacgttgacggtaca	0.777307	0.933736	10.068	12.0629	0.00218992	6.84205e-05	1	1.99488	0.154546	strong
chr21	34733260	34733260	1	+	rs117044985	G	A	SNV	c(-7, 3)	E2F4	jaspar2018	MA0470.1	MA0470.1	attgagcgggAacgttgacgg	0.822703	0.958459	9.81648	11.4292	0.00104165	5.24521e-05	1	1.61276	0.135268	strong
chr21	34733260	34733260	1	+	rs117044985	G	A	SNV	c(-7, 3)	E2F6	jaspar2018	MA0471.1	MA0471.1	attgagcgggAacgttgacgg	0.791534	0.958938	9.47256	11.4678	0.00166488	3.45707e-05	1	1.99523	0.166865	strong
chr21	34733260	34733260	1	-	rs117044985	G	A	SNV	c(-10, 3)	E2F7	jaspar2018	MA0758.1	MA0758.1	gtgattgagcgggAacgttgacggtac	0.669688	0.754554	15.6179	17.5913	0.0009549	9.30168e-05	1	1.97345	0.0847018	strong
chr21	34733260	34733260	1	-	rs117044985	G	A	SNV	c(-9, 2)	E2F8	jaspar2018	MA0865.1	MA0865.1	gattgagcgggAacgttgacggt	0.688067	0.78173	13.5226	15.3512	0.000829995	5.78165e-05	1	1.82856	0.0932348	strong
chr21	34733260	34733260	1	+	rs117044985	G	A	SNV	c(-7, 3)	TFDP1	jaspar2018	MA1122.1	MA1122.1	attgagcgggAacgttgacgg	0.854655	0.98871	8.62756	9.9518	0.00044632	3.0756e-05	1	1.32423	0.13159	strong
chr5	10760890	10760890	1	-	rs11740255	G	C	SNV	c(-9, 1)	Egr1	jaspar2018	MA0162.1	MA0162.1	gccgcccgcgCtcctcaggaa	0.849354	0.914176	8.54199	9.17857	0.000239372	3.02792e-05	1	0.636579	0.063522	weak
chr5	10760890	10760890	1	+	rs11740255	G	C	SNV	c(-12, 1)	EGR1	jaspar2018	MA0162.2	MA0162.2	gcggccgcccgcgCtcctcaggaagaa	0.853914	0.918292	10.0747	10.8264	0.000211399	2.47099e-05	1	0.751742	0.0638121	strong
chr5	10760890	10760890	1	+	rs11740255	G	C	SNV	c(-10, 3)	EGR1	jaspar2018	MA0162.3	MA0162.3	gcggccgcccgcgCtcctcaggaagaa	0.747796	0.852254	13.7778	15.6919	0.000473913	2.78428e-05	1	1.9141	0.104032	strong
chr5	10760890	10760890	1	+	rs11740255	G	C	SNV	c(-9, 1)	EGR2	jaspar2018	MA0472.2	MA0472.2	gccgcccgcgCtcctcaggaa	0.766337	0.866911	10.6707	12.0611	0.000707388	5.8651e-05	1	1.39043	0.100023	strong
chr5	10760890	10760890	1	+	rs11740255	G	C	SNV	c(-12, 2)	EGR2	jaspar2018	MA0472.1	MA0472.1	cgcggccgcccgcgCtcctcaggaagaaa	0.813478	0.889433	9.59546	10.4788	0.000830345	9.14438e-05	1	0.883391	0.0750878	strong
chr5	10760890	10760890	1	+	rs11740255	G	C	SNV	c(-11, 3)	EGR3	jaspar2018	MA0732.1	MA0732.1	cgcggccgcccgcgCtcctcaggaagaaa	0.781366	0.894406	13.04	14.9066	0.000335687	1.35042e-05	1	1.86664	0.112108	strong
chr5	10760890	10760890	1	+	rs11740255	G	C	SNV	c(-11, 4)	EGR4	jaspar2018	MA0733.1	MA0733.1	acgcggccgcccgcgCtcctcaggaagaaac	0.787265	0.901085	9.27415	10.5666	0.000451163	1.68497e-05	1	1.29243	0.110561	strong
chr5	10760890	10760890	1	-	rs11740255	G	C	SNV	c(-13, 7)	REST	jaspar2018	MA0138.2	MA0138.2	caggtacgcggccgcccgcgGtcctcaggaagaaacgcttc	0.760075	0.667503	15.575	13.7309	4.68418e-05	0.000751907	1	-1.84412	-0.0906001	strong
chr5	10760890	10760890	1	+	rs11740255	G	C	SNV	c(-11, 3)	ZIC4	jaspar2018	MA0751.1	MA0751.1	cgcggccgcccgcgGtcctcaggaagaaa	0.886362	0.749706	9.88798	8.39757	3.38443e-05	0.00164735	1	-1.49041	-0.133941	strong
chr10	112258425	112258425	1	+	rs143273538	C	T	SNV	c(-5, 2)	ISL2	jaspar2018	MA0914.1	MA0914.1	cagcactTagagctc	0.837361	0.991317	5.15819	6.07689	0.00202942	1.52588e-05	1	0.918701	0.149901	strong
chr10	112258425	112258425	1	+	rs143273538	C	T	SNV	c(-6, 2)	Nkx3-1	jaspar2018	MA0124.2	MA0124.2	tcagcactTagagctcc	0.815383	0.968475	8.49779	10.0726	0.0017128	8.01086e-05	1	1.57477	0.151466	strong
chr10	112258425	112258425	1	+	rs143273538	C	T	SNV	c(-6, 2)	NKX3-2	jaspar2018	MA0122.2	MA0122.2	tcagcactTagagctcc	0.805278	0.982604	7.49318	9.11808	0.0029068	9.15527e-05	1	1.6249	0.175144	strong
chr1	172787588	172787588	1	-	rs16844989	C	T	SNV	c(-3, 6)	Arntl	jaspar2018	MA0603.1	MA0603.1	tagtgtgcaCgtgaccaga	1	0.849655	10.0604	8.57238	0	0.000583649	1	-1.48806	-0.147912	strong
chr1	172787588	172787588	1	-	rs16844989	C	T	SNV	c(-5, 5)	Bhlhe40	jaspar2018	MA0464.1	MA0464.1	ttagtgtgcaCgtgaccagag	0.998899	0.951139	11.5446	10.9952	2.38419e-07	6.12736e-05	1	-0.549365	-0.0475342	weak
chr1	172787588	172787588	1	+	rs16844989	C	T	SNV	c(-4, 5)	BHLHE40	jaspar2018	MA0464.2	MA0464.2	tagtgtgcaCgtgaccaga	0.995129	0.829556	11.7031	9.77085	1.04904e-05	0.00106621	1	-1.9322	-0.164305	strong
chr1	172787588	172787588	1	+	rs16844989	C	T	SNV	c(-4, 5)	BHLHE41	jaspar2018	MA0636.1	MA0636.1	tagtgtgcaCgtgaccaga	0.937434	0.799983	13.5201	11.5409	2.19345e-05	0.000662804	1	-1.97928	-0.137249	strong
chr1	172787588	172787588	1	-	rs16844989	C	T	SNV	c(-3, 5)	Creb3l2	jaspar2018	MA0608.1	MA0608.1	agtgtgcaCgtgaccag	0.95072	0.784543	11.1663	9.21764	5.72205e-05	0.00235367	1	-1.94865	-0.165925	strong
chr1	172787588	172787588	1	-	rs16844989	C	T	SNV	c(-5, 6)	HES5	jaspar2018	MA0821.1	MA0821.1	cttagtgtgcaCgtgaccagagc	0.840871	0.727499	14.75	12.7653	9.72152e-05	0.00130641	1	-1.98473	-0.113182	strong
chr1	172787588	172787588	1	+	rs16844989	C	T	SNV	c(-4, 5)	HEY1	jaspar2018	MA0823.1	MA0823.1	tagtgtgcaCgtgaccaga	0.974405	0.794931	10.9847	8.98824	4.76837e-05	0.00270653	1	-1.99647	-0.177158	strong
chr1	172787588	172787588	1	-	rs16844989	C	T	SNV	c(-4, 5)	HEY2	jaspar2018	MA0649.1	MA0649.1	tagtgtgcaCgtgaccaga	0.991242	0.845658	10.6864	9.13941	1.52588e-05	0.00063324	1	-1.54697	-0.143511	strong
chr1	172787588	172787588	1	+	rs16844989	C	T	SNV	c(-3, 4)	Id2	jaspar2018	MA0617.1	MA0617.1	gtgtgcaCgtgacca	1	0.837351	12.2591	10.2711	0	0.000244141	1	-1.98798	-0.162164	strong
chr1	172787588	172787588	1	-	rs16844989	C	T	SNV	c(-3, 6)	MAX	jaspar2018	MA0058.1	MA0058.1	tagtgtgcaCgtgaccaga	0.970679	0.844828	9.35948	8.16933	8.4877e-05	0.000658035	1	-1.19015	-0.123501	strong
chr1	172787588	172787588	1	+	rs16844989	C	T	SNV	c(-8, 9)	MITF	jaspar2018	MA0620.2	MA0620.2	tcctcacttagtgtgcaCgtgaccagagctctgca	0.876853	0.82421	11.1263	10.4701	6.67844e-05	0.000302822	1	-0.656157	-0.0518241	weak
chr1	172787588	172787588	1	+	rs16844989	C	T	SNV	c(-4, 5)	MLX	jaspar2018	MA0663.1	MA0663.1	tagtgtgcaCgtgaccaga	0.904367	0.757166	12.2442	10.2645	5.72205e-05	0.00174904	1	-1.97972	-0.146317	strong
chr1	172787588	172787588	1	+	rs16844989	C	T	SNV	c(-3, 4)	Mlxip	jaspar2018	MA0622.1	MA0622.1	gtgtgcaCgtgacca	0.992469	0.828752	12.0854	10.0974	7.62939e-05	0.00161743	1	-1.98797	-0.163258	strong
chr1	172787588	172787588	1	-	rs16844989	C	T	SNV	c(-4, 5)	MLXIPL	jaspar2018	MA0664.1	MA0664.1	tagtgtgcaCgtgaccaga	0.975176	0.831014	11.516	9.82784	4.00543e-05	0.000533104	1	-1.6882	-0.142986	strong
chr1	172787588	172787588	1	-	rs16844989	C	T	SNV	c(-5, 7)	MXI1	jaspar2018	MA1108.1	MA1108.1	acttagtgtgcaCgtgaccagagct	0.950726	0.801841	9.91227	8.38536	0.000105798	0.00162788	1	-1.52691	-0.14657	strong
chr1	172787588	172787588	1	-	rs16844989	C	T	SNV	c(-5, 6)	MYC	jaspar2018	MA0147.3	MA0147.3	cttagtgtgcaCgtgaccagagc	0.941602	0.805435	9.56269	8.20836	9.11355e-05	0.00139517	1	-1.35433	-0.133517	strong
chr1	172787588	172787588	1	+	rs16844989	C	T	SNV	c(-4, 5)	Mycn	jaspar2018	MA0104.2	MA0104.2	tagtgtgcaCgtgaccaga	0.942578	0.774398	9.1485	7.54213	8.58307e-05	0.00274277	1	-1.60637	-0.165657	strong
chr1	172787588	172787588	1	+	rs16844989	C	T	SNV	c(-4, 5)	Srebf1(var.2)	jaspar2018	MA0829.1	MA0829.1	tagtgtgcaCgtgaccaga	0.884152	0.763974	12.0249	10.3954	7.05719e-05	0.00119591	1	-1.62951	-0.119855	strong
chr1	172787588	172787588	1	+	rs16844989	C	T	SNV	c(-4, 5)	SREBF2(var.2)	jaspar2018	MA0828.1	MA0828.1	tagtgtgcaCgtgaccaga	0.875643	0.750419	12.4092	10.6374	6.29425e-05	0.00137806	1	-1.77178	-0.125049	strong
chr1	172787588	172787588	1	+	rs16844989	C	T	SNV	c(-2, 5)	TFE3	jaspar2018	MA0831.2	MA0831.2	gtgtgcaCgtgacca	1	0.911073	9.78427	8.92161	0	0.000305176	1	-0.862659	-0.0881679	strong
chr1	172787588	172787588	1	+	rs16844989	C	T	SNV	c(-4, 5)	TFE3	jaspar2018	MA0831.1	MA0831.1	tagtgtgcaCgtgaccaga	0.990514	0.863775	8.06721	7.05679	1.33514e-05	0.00177097	1	-1.01041	-0.124086	strong
chr1	172787588	172787588	1	+	rs16844989	C	T	SNV	c(-4, 5)	TFEB	jaspar2018	MA0692.1	MA0692.1	tagtgtgcaCgtgaccaga	0.976441	0.86718	9.64929	8.58471	1.43051e-05	0.000565529	1	-1.06457	-0.107763	strong
chr1	172787588	172787588	1	+	rs16844989	C	T	SNV	c(-4, 5)	TFEC	jaspar2018	MA0871.1	MA0871.1	tagtgtgcaCgtgaccaga	0.960192	0.89078	8.30025	7.70818	4.86374e-05	0.000693321	1	-0.592069	-0.0685282	weak
chr1	172787588	172787588	1	-	rs16844989	C	T	SNV	c(-6, 9)	USF2	jaspar2018	MA0526.2	MA0526.2	ctcacttagtgtgcaCgtgaccagagctctg	0.979558	0.876224	12.8077	11.474	8.35815e-06	0.000121123	1	-1.33365	-0.102027	strong
chr5	150226899	150226899	1	+	rs17111376	T	C	SNV	c(-8, 10)	REST	jaspar2018	MA0138.1	MA0138.1	cacttttacttgtctggtCttggtcttgaaatatgta	0.660615	0.738702	11.5711	12.8966	0.000936695	9.43538e-05	1	1.32552	0.0764777	strong
chr5	150226899	150226899	1	-	rs17111376	T	C	SNV	c(-10, 4)	TP53	jaspar2018	MA0106.2	MA0106.2	tttacttgtctggtCttggtcttgaaata	0.706986	0.850597	9.99643	11.9865	0.00192607	2.66172e-05	1	1.99004	0.141572	strong
chr5	150226899	150226899	1	-	rs17111376	T	C	SNV	c(-12, 5)	TP73	jaspar2018	MA0861.1	MA0861.1	acttttacttgtctggtCttggtcttgaaatatgt	0.70609	0.841923	10.3671	12.3255	0.00262993	8.33583e-05	1	1.95847	0.134099	strong
chr7	50321474	50321474	1	+	rs17634369	G	A	SNV	c(-2, 11)	SPI1	jaspar2018	MA0080.4	MA0080.4	agaccatatctgtAaagtggaagcaag	0.719813	0.813716	14.6917	16.5982	0.000533368	3.69884e-05	1	1.90653	0.0935473	strong
chr7	50321474	50321474	1	+	rs17634369	G	A	SNV	c(-2, 11)	SPIC	jaspar2018	MA0687.1	MA0687.1	agaccatatctgtAaagtggaagcaag	0.871121	0.929508	9.3649	9.97773	5.40912e-05	4.8317e-06	1	0.612821	0.0571789	weak
chr2	204570000	204570000	1	+	rs1879877	G	T	SNV	c(-5, 8)	TCF7L2	jaspar2018	MA0523.1	MA0523.1	aataaccctctctTcaaagggcctggg	0.768891	0.918397	9.01155	10.7411	0.00240866	9.49576e-05	1	1.72956	0.148014	strong
chr2	102759199	102759199	1	+	rs190185055	G	A	SNV	c(-1, 10)	ELF1	jaspar2018	MA0473.2	MA0473.2	gccagagccgcAcccggcagttc	0.808981	0.851725	12.1724	12.8087	0.000280678	9.01818e-05	1	0.636257	0.0423725	weak
chr2	102759199	102759199	1	+	rs190185055	G	A	SNV	c(-1, 11)	ELF3	jaspar2018	MA0640.1	MA0640.1	agccagagccgcAcccggcagttcc	0.760696	0.849698	12.1519	13.5611	0.000541523	5.28097e-05	1	1.40915	0.088399	strong
chr2	102759199	102759199	1	+	rs190185055	G	A	SNV	c(-1, 10)	ELF4	jaspar2018	MA0641.1	MA0641.1	gccagagccgcAcccggcagttc	0.808583	0.852252	12.1121	12.7589	0.000284314	8.64267e-05	1	0.646771	0.0432705	weak
chr2	102759199	102759199	1	+	rs190185055	G	A	SNV	c(-8, 8)	SP4	jaspar2018	MA0685.1	MA0685.1	ctagagccagagccgcGcccggcagttcccggc	0.831968	0.72605	14.5916	12.7482	5.21676e-05	0.000915467	1	-1.84338	-0.105239	strong
chr16	11351211	11351211	1	-	rs193778	A	G	SNV	c(-12, 2)	MEF2A	jaspar2018	MA0052.2	MA0052.2	tccgtgtatttttgGatgaaggcatgtga	0.849095	0.904467	10.9118	11.6141	0.000128726	2.18619e-05	1	0.702301	0.054757	strong
chr16	11351211	11351211	1	-	rs193778	A	G	SNV	c(-5, 7)	ZNF24	jaspar2018	MA1124.1	MA1124.1	cgtgtatttttgAatgaaggcatgt	0.812329	0.748854	12.8029	11.8294	4.24236e-05	0.000263274	1	-0.973481	-0.0620797	strong
chr16	11351211	11351211	1	-	rs193778	A	G	SNV	c(-11, 5)	ZNF410	jaspar2018	MA0752.1	MA0752.1	gctccgtgtatttttgGatgaaggcatgtgagg	0.729498	0.807827	17.0514	18.8735	0.000271621	2.73152e-05	1	1.82206	0.0780535	strong
chr20	30777860	30777860	1	-	rs11907235	A	G	SNV	c(-6, 5)	YY1	jaspar2018	MA0095.2	MA0095.2	cggacccggccAttttccaggct	0.951666	0.799811	12.5434	10.5696	2.24113e-05	0.000895679	1	-1.9738	-0.149852	strong
chr15	75137398	75137398	1	+	rs201655406	G	C	SNV	c(-9, -1)	Klf4	jaspar2018	MA0039.1	MA0039.1	gagagaaagGctgaggggg	0.926819	0.712048	4.32961	3.3719	9.44138e-05	0.0225306	1	-0.957715	-0.205697	strong
chr15	75137398	75137398	1	+	rs201655406	G	C	SNV	c(-5, 9)	TFAP2A	jaspar2018	MA0003.2	MA0003.2	caggcgagagaaagCctgagggggagaga	0.722366	0.913546	7.78029	9.77758	0.00536858	3.61605e-05	1	1.99729	0.186998	strong
chr15	75137398	75137398	1	-	rs201655406	G	C	SNV	c(-2, 9)	TFAP2A(var.2)	jaspar2018	MA0810.1	MA0810.1	gcgagagaaagCctgagggggag	0.857356	0.959754	7.51849	8.40388	0.00104785	4.74453e-05	1	0.885396	0.101166	strong
chr15	75137398	75137398	1	-	rs201655406	G	C	SNV	c(-3, 11)	TFAP2C	jaspar2018	MA0524.1	MA0524.1	caggcgagagaaagCctgagggggagaga	0.756076	0.94709	8.07705	10.0762	0.00471186	4.15556e-05	1	1.99917	0.188069	strong
chr1	2487766	2487766	1	-	rs2227313	T	C	SNV	c(-8, 4)	TEAD2	jaspar2018	MA1121.1	MA1121.1	agtggactggaaTggtgcaggggga	0.908966	0.750555	9.05675	7.51679	0.000110045	0.00321646	1	-1.53996	-0.154899	strong
chr2	71127794	71127794	1	-	rs2234495	C	A	SNV	c(-6, 8)	ZIC4	jaspar2018	MA0751.1	MA0751.1	ggggccccgcgcgcCgggcggagtctggt	0.866429	0.784242	9.67058	8.77422	6.93304e-05	0.000740101	1	-0.896359	-0.0805547	strong
chr22	37544345	37544345	1	-	rs228978	T	C	SNV	c(-9, 1)	CEBPB	jaspar2018	MA0466.1	MA0466.1	cattctgcaaTggggaagctg	0.963496	0.914682	11.3662	10.7938	7.39098e-06	8.53539e-05	1	-0.572426	-0.0485343	weak
chr5	100226669	100226669	1	-	rs2400313	C	T	SNV	c(-2, 9)	CREB1	jaspar2018	MA0018.1	MA0018.1	ttccctttcaaCgtcacctatca	0.961332	0.7822	8.61447	7.04345	7.90954e-05	0.00330913	1	-1.57102	-0.175463	strong
chr5	100226669	100226669	1	+	rs2400313	C	T	SNV	c(-6, 7)	CREB3	jaspar2018	MA0638.1	MA0638.1	acttccctttcaaCgtcacctatcact	0.871444	0.725351	11.9825	10.0036	7.98851e-05	0.00236103	1	-1.97894	-0.144197	strong
chr5	100226669	100226669	1	-	rs2400313	C	T	SNV	c(1, 11)	PKNOX1	jaspar2018	MA0782.1	MA0782.1	ttccctttcaaTgtcacctatca	0.737258	0.816654	15.3018	16.9476	0.000316024	5.45979e-05	1	1.64578	0.0793221	strong
chr5	100226669	100226669	1	-	rs2400313	C	T	SNV	c(1, 11)	PKNOX2	jaspar2018	MA0783.1	MA0783.1	ttccctttcaaTgtcacctatca	0.741762	0.826036	15.1666	16.8873	0.000237167	2.16365e-05	1	1.7207	0.0841858	strong
chr5	100226669	100226669	1	-	rs2400313	C	T	SNV	c(1, 11)	TGIF1	jaspar2018	MA0796.1	MA0796.1	ttccctttcaaTgtcacctatca	0.70461	0.791106	15.3896	17.2773	0.000639677	6.86049e-05	1	1.88769	0.0864477	strong
chr5	100226669	100226669	1	-	rs2400313	C	T	SNV	c(1, 11)	TGIF2	jaspar2018	MA0797.1	MA0797.1	ttccctttcaaTgtcacctatca	0.743709	0.822008	12.7687	14.0997	0.000400782	4.48227e-05	1	1.33102	0.077722	strong
chr12	6570821	6570821	1	+	rs2534711	T	G	SNV	c(-7, 4)	TFAP2C	jaspar2018	MA0524.2	MA0524.2	aggcacccccgGggctccatctc	0.872174	0.921697	7.3462	7.75542	0.000570536	9.82881e-05	1	0.409227	0.0487031	weak
chr20	57828583	57828583	1	-	rs259958	C	A	SNV	c(-4, 7)	FOXI1	jaspar2018	MA0042.1	MA0042.1	ccggaaaaaacAaaaaaaccaaa	0.887665	0.94598	8.85557	9.42648	0.000492692	6.4373e-05	1	0.570916	0.0573476	weak
chr5	131799961	131799961	1	-	rs2706336	T	C	SNV	c(-2, 8)	Rxra	jaspar2018	MA0512.1	MA0512.1	gtccagtaccTgccctctgag	0.939975	0.760671	10.5521	8.55464	2.67029e-05	0.00311637	1	-1.99741	-0.178011	strong
chr5	131799961	131799961	1	+	rs2706336	T	C	SNV	c(-4, 10)	SP2	jaspar2018	MA0516.1	MA0516.1	accagtccagtaccCgccctctgagggtg	0.764182	0.915558	8.89173	10.6215	0.00256756	4.85415e-05	1	1.72974	0.149291	strong
chr11	35088838	35088838	1	-	rs2785201	G	T	SNV	c(-9, 3)	NEUROD1	jaspar2018	MA1109.1	MA1109.1	tctagcccatctGtagccacaagag	0.993845	0.830139	11.0012	9.21302	1.4618e-05	0.000910655	1	-1.78814	-0.161554	strong
chr6	42081844	42081844	1	+	rs12211359	C	A	SNV	c(-8, 1)	CEBPB	jaspar2018	MA0466.2	MA0466.2	tattactcaAtatgccctt	0.731862	0.911125	8.16508	10.1522	0.00490189	9.34601e-05	1	1.98711	0.178419	strong
chr6	42081844	42081844	1	+	rs12211359	C	A	SNV	c(-8, 1)	CEBPE	jaspar2018	MA0837.1	MA0837.1	tattactcaAtatgccctt	0.716976	0.918196	7.15257	9.13668	0.00764465	0.000101089	1	1.98411	0.199542	strong
chr6	42081844	42081844	1	+	rs12211359	C	A	SNV	c(-8, 1)	CEBPG	jaspar2018	MA0838.1	MA0838.1	tattactcaAtatgccctt	0.73897	0.887496	9.78357	11.7414	0.00214577	7.15256e-05	1	1.95787	0.148049	strong
chr5	118703662	118703662	1	-	rs32658	G	T	SNV	c(-7, 7)	HSF1	jaspar2018	MA0486.1	MA0486.1	agtcatgagaatcaTctagagtcagtatt	0.818091	0.882442	10.5625	11.3748	0.000189614	2.52463e-05	1	0.812237	0.0631668	strong
chr5	118703662	118703662	1	-	rs32658	G	T	SNV	c(-6, 6)	HSF4	jaspar2018	MA0771.1	MA0771.1	tcatgagaatcaTctagagtcagta	0.81814	0.900477	9.77524	10.7404	0.000336841	3.0905e-05	1	0.965207	0.0810613	strong
chr12	6444963	6444963	1	+	rs34819705	G	A	SNV	c(-4, 5)	FOS::JUN	jaspar2018	MA0099.3	MA0099.3	tcaccctgaGtcagccacg	0.950713	0.911311	9.929	9.52214	6.10352e-05	0.000219345	1	-0.406861	-0.038979	weak
chr12	6444963	6444963	1	+	rs34819705	G	A	SNV	c(-6, 6)	FOS::JUND	jaspar2018	MA1141.1	MA1141.1	cagtcaccctgaGtcagccacgggg	0.94816	0.866273	11.4731	10.4903	4.74304e-05	0.000340641	1	-0.982742	-0.0812503	strong
chr12	6444963	6444963	1	-	rs34819705	G	A	SNV	c(-5, 5)	FOSL1	jaspar2018	MA0477.1	MA0477.1	gtcaccctgaGtcagccacgg	0.970281	0.92966	12.6748	12.146	3.26633e-05	0.00017333	1	-0.528846	-0.0404882	weak
chr12	6444963	6444963	1	-	rs34819705	G	A	SNV	c(-6, 6)	FOSL1::JUN	jaspar2018	MA1128.1	MA1128.1	cagtcaccctgaGtcagccacgggg	0.952367	0.87915	10.4215	9.62949	4.60446e-05	0.000338152	1	-0.791973	-0.0724142	strong
chr12	6444963	6444963	1	-	rs34819705	G	A	SNV	c(-4, 6)	FOSL2	jaspar2018	MA0478.1	MA0478.1	gtcaccctgaGtcagccacgg	0.964371	0.924409	12.2013	11.6979	4.88758e-05	0.000180006	1	-0.503402	-0.0397944	weak
chr12	6444963	6444963	1	-	rs34819705	G	A	SNV	c(-4, 5)	JUN::JUNB	jaspar2018	MA1132.1	MA1132.1	tcaccctgaGtcagccacg	0.952102	0.842446	7.79822	6.92194	7.05719e-05	0.0012064	1	-0.876279	-0.107112	strong
chr12	6444963	6444963	1	-	rs34819705	G	A	SNV	c(-4, 6)	JUNB	jaspar2018	MA0490.1	MA0490.1	gtcaccctgaGtcagccacgg	0.968692	0.93524	12.272	11.8496	5.72205e-05	0.000183105	1	-0.422346	-0.0333415	weak
chr12	6444963	6444963	1	-	rs34819705	G	A	SNV	c(-5, 5)	JUND	jaspar2018	MA0491.1	MA0491.1	gtcaccctgaGtcagccacgg	0.921431	0.88848	12.459	12.0144	9.5129e-05	0.000201941	1	-0.444646	-0.0328899	weak
chr15	75092546	75092546	1	+	rs35625871	G	A	SNV	c(-4, 5)	MAX	jaspar2018	MA0058.2	MA0058.2	ccagcaaccAcatgtaggg	0.810122	0.978184	9.70703	11.7064	0.00129128	2.09808e-05	1	1.99937	0.167088	strong
chr15	75092546	75092546	1	-	rs35625871	G	A	SNV	c(-4, 5)	Myc	jaspar2018	MA0147.2	MA0147.2	ccagcaaccAcatgtaggg	0.79441	0.965822	9.2986	11.296	0.00216389	7.9155e-05	1	1.9974	0.170802	strong
chr15	75092546	75092546	1	-	rs35625871	G	A	SNV	c(-5, 5)	RUNX1	jaspar2018	MA0002.2	MA0002.2	tccagcaaccAcatgtagggt	0.850125	0.957418	7.65504	8.60048	0.00113511	5.91278e-05	1	0.945434	0.105333	strong
chr15	75092546	75092546	1	+	rs35625871	G	A	SNV	c(-5, 3)	RUNX2	jaspar2018	MA0511.2	MA0511.2	cagcaaccGcatgtagg	0.960862	0.921672	10.0061	9.60388	4.95911e-05	0.000221252	1	-0.402236	-0.0386475	weak
chr5	100239187	100239187	1	+	rs3756353	C	T	SNV	c(-7, 2)	MAX	jaspar2018	MA0058.2	MA0058.2	gcacacacaTgtacacgca	0.792796	0.960858	9.5009	11.5003	0.00237846	9.34601e-05	1	1.99937	0.167088	strong
chr5	100239187	100239187	1	-	rs3756353	C	T	SNV	c(-13, 6)	TP53	jaspar2018	MA0106.1	MA0106.1	acatacatatgcacacacaTgtacacgcagaatcacaca	0.648222	0.735567	12.2441	13.8346	0.00082055	4.89478e-05	1	1.59052	0.0852833	strong
chr5	100239187	100239187	1	+	rs3756353	C	T	SNV	c(-13, 1)	TP53	jaspar2018	MA0106.2	MA0106.2	catatgcacacacaTgtacacgcagaatc	0.769234	0.827393	10.859	11.6649	0.000413368	6.51795e-05	1	0.805922	0.0573334	strong
chr5	100239187	100239187	1	+	rs3756353	C	T	SNV	c(-14, 3)	TP53	jaspar2018	MA0106.3	MA0106.3	atacatatgcacacacaTgtacacgcagaatcaca	0.721216	0.796915	12.6776	13.9846	0.000434692	4.10459e-05	1	1.30695	0.0747217	strong
chr2	102759341	102759341	1	+	rs41294844	G	A	SNV	c(-5, 8)	CTCFL	jaspar2018	MA1102.1	MA1102.1	cccgcgcgccccaGggagcggcaggaa	0.868377	0.730002	11.0746	9.35908	7.32876e-05	0.0018787	1	-1.71554	-0.135014	strong
chr2	102759341	102759341	1	+	rs41294844	G	A	SNV	c(-7, 3)	EBF1	jaspar2018	MA0154.2	MA0154.2	gcgcgccccaGggagcggcag	0.962164	0.813296	10.9001	9.22007	8.10623e-06	0.0015552	1	-1.68002	-0.148319	strong
chr2	102759341	102759341	1	+	rs41294844	G	A	SNV	c(-8, 5)	EBF1	jaspar2018	MA0154.3	MA0154.3	cccgcgcgccccaGggagcggcaggaa	0.875524	0.750311	12.7504	10.9505	6.13295e-05	0.00127949	1	-1.79992	-0.123794	strong
chr2	102759341	102759341	1	+	rs41294844	G	A	SNV	c(-6, 3)	EBF1	jaspar2018	MA0154.1	MA0154.1	cgcgccccaGggagcggca	0.985261	0.783639	8.46081	6.76301	8.58307e-06	0.00294781	1	-1.6978	-0.197765	strong
chr2	102759341	102759341	1	+	rs41294844	G	A	SNV	c(-10, 4)	TFAP2A	jaspar2018	MA0003.2	MA0003.2	ccccgcgcgccccaGggagcggcaggaat	0.893396	0.829622	9.56707	8.90081	8.75136e-05	0.000691067	1	-0.666253	-0.0623787	weak
chr2	102759341	102759341	1	-	rs41294844	G	A	SNV	c(-7, 4)	TFAP2A(var.2)	jaspar2018	MA0810.1	MA0810.1	cgcgcgccccaGggagcggcagg	0.94604	0.89829	8.2853	7.87242	0.000101447	0.000400245	1	-0.412875	-0.0471756	weak
chr2	102759341	102759341	1	+	rs41294844	G	A	SNV	c(-10, 4)	TFAP2C	jaspar2018	MA0524.1	MA0524.1	ccccgcgcgccccaGggagcggcaggaat	0.97729	0.846335	10.3923	9.0217	6.70739e-06	0.000874451	1	-1.3706	-0.128937	strong
chr2	191979178	191979178	1	+	rs4254532	G	A	SNV	c(-6, 2)	SRY	jaspar2018	MA0084.1	MA0084.1	gaagaaacAatatattt	0.735933	0.988989	5.16591	6.89014	0.0131149	4.19617e-05	1	1.72423	0.247551	strong
chr12	6533032	6533032	1	-	rs12369647	C	T	SNV	c(-6, 11)	PPARA::RXRA	jaspar2018	MA1148.1	MA1148.1	cccaaggcccttctaccTcttccccaggggacttc	0.764406	0.844414	7.22215	7.93888	0.000455318	4.06633e-05	1	0.71673	0.076798	strong
chr4	123498293	123498293	1	+	rs45437792	G	T	SNV	c(-13, -1)	IRF7	jaspar2018	MA0772.1	MA0772.1	ataaaatagaaaaTaaggaaagttttt	0.808297	0.838754	12.9408	13.4223	0.000186812	8.03322e-05	1	0.481479	0.0301464	weak
chr4	123498293	123498293	1	-	rs45437792	G	T	SNV	c(-12, 2)	STAT1::STAT2	jaspar2018	MA0517.1	MA0517.1	aataaaatagaaaaTaaggaaagtttttg	0.825912	0.866419	11.8581	12.4305	0.000146706	4.73754e-05	1	0.572411	0.039978	weak
chr2	219122781	219122781	1	+	rs4674277	G	T	SNV	c(-4, 3)	Dux	jaspar2018	MA0611.1	MA0611.1	ggttcaaTcaattct	0.824602	0.999869	9.37025	11.3582	0.00143433	3.05176e-05	1	1.98797	0.175001	strong
chr2	219122781	219122781	1	+	rs4674277	G	T	SNV	c(-7, 4)	PBX1	jaspar2018	MA0070.1	MA0070.1	cccgggttcaaTcaattctcctg	0.782949	0.896322	8.66402	9.88569	0.000727654	4.47631e-05	1	1.22167	0.111031	strong
chr7	50305863	50305863	1	-	rs4917014	T	G	SNV	c(-7, 7)	LEF1	jaspar2018	MA0768.1	MA0768.1	gtgcaatgctacttTgctcttgagagtct	0.841805	0.720107	13.5656	11.6342	6.60261e-05	0.00127328	1	-1.93136	-0.120138	strong
chr7	50305863	50305863	1	-	rs4917014	T	G	SNV	c(-4, 7)	Tcf7	jaspar2018	MA0769.1	MA0769.1	caatgctacttTgctcttgagag	0.85341	0.732081	13.2788	11.4137	4.50611e-05	0.000986755	1	-1.8651	-0.120079	strong
chr7	50305863	50305863	1	-	rs4917014	T	G	SNV	c(-4, 7)	TCF7L1	jaspar2018	MA1421.1	MA1421.1	caatgctacttTgctcttgagag	0.858205	0.739745	12.8818	11.1261	3.18289e-05	0.000804126	1	-1.75568	-0.117176	strong
chr5	176784448	176784448	1	+	rs4976689	C	G	SNV	c(-3, 7)	Egr1	jaspar2018	MA0162.1	MA0162.1	gtgcagctgcGggggagaggg	0.727702	0.885479	7.34732	8.89676	0.0034194	9.34601e-05	1	1.54944	0.154613	strong
chr5	176784448	176784448	1	-	rs4976689	C	G	SNV	c(-3, 10)	EGR1	jaspar2018	MA0162.2	MA0162.2	tatgtgcagctgcGggggagaggggta	0.738733	0.891684	8.72974	10.5158	0.00279625	6.50808e-05	1	1.78601	0.151606	strong
chr5	176784448	176784448	1	-	rs4976689	C	G	SNV	c(-5, 8)	EGR1	jaspar2018	MA0162.3	MA0162.3	tatgtgcagctgcGggggagaggggta	0.700377	0.808756	12.9089	14.8948	0.00135034	9.34377e-05	1	1.98595	0.107936	strong
chr5	176784448	176784448	1	-	rs4976689	C	G	SNV	c(-5, 9)	EGR3	jaspar2018	MA0732.1	MA0732.1	atatgtgcagctgcGggggagaggggtac	0.729934	0.846916	12.1907	14.1224	0.00110707	6.0657e-05	1	1.93173	0.116018	strong
chr5	176784448	176784448	1	-	rs4976689	C	G	SNV	c(-6, 9)	EGR4	jaspar2018	MA0733.1	MA0733.1	catatgtgcagctgcGggggagaggggtact	0.742584	0.85848	8.7668	10.0828	0.00126134	6.78843e-05	1	1.31601	0.112578	strong
chr5	176784448	176784448	1	-	rs4976689	C	G	SNV	c(1, 10)	KLF16	jaspar2018	MA0741.1	MA0741.1	gtgcagctgcGggggagaggg	0.832787	0.910023	9.51833	10.3899	0.000477552	6.03199e-05	1	0.871614	0.0764216	strong
chr5	176784448	176784448	1	-	rs4976689	C	G	SNV	c(-10, 1)	NHLH1	jaspar2018	MA0048.1	MA0048.1	tgtgcagctgcGggggagagggg	0.89799	0.951468	10.6942	11.3225	8.08835e-05	8.88109e-06	1	0.628283	0.0528296	weak
chr5	176784448	176784448	1	-	rs4976689	C	G	SNV	c(-9, -1)	NHLH1	jaspar2018	MA0048.2	MA0048.2	tgcagctgcGggggagagg	0.954716	0.990606	11.4756	11.9028	1.71661e-05	2.86102e-06	1	0.427206	0.0355572	weak
chr5	176784448	176784448	1	+	rs4976689	C	G	SNV	c(1, 20)	ZNF263	jaspar2018	MA0528.1	MA0528.1	ccctgcatatgtgcagctgcGggggagaggggtactgagca	0.717797	0.770216	8.19155	8.7647	0.000498132	7.49967e-05	1	0.573149	0.0508241	weak
chr10	75692473	75692473	1	-	rs535699267	C	T	SNV	c(-13, 2)	GLIS1	jaspar2018	MA0735.1	MA0735.1	gggcgtggtggcgggTgcctgtaatcccagc	0.688069	0.769587	16.6507	18.6185	0.000558327	5.55988e-05	1	1.96779	0.0813793	strong
chr10	75692473	75692473	1	-	rs535699267	C	T	SNV	c(-12, 1)	GLIS3	jaspar2018	MA0737.1	MA0737.1	gcgtggtggcgggTgcctgtaatccca	0.740413	0.82562	14.3325	15.9766	0.00025199	1.83992e-05	1	1.64413	0.0850057	strong
chr11	60869481	60869481	1	+	rs545230	C	A	SNV	c(-1, 8)	MSC	jaspar2018	MA0665.1	MA0665.1	agcaaaacaAcacctgtgg	0.795008	0.855205	10.3194	11.0953	0.000447273	8.86917e-05	1	0.775923	0.0598628	strong
chr11	60869481	60869481	1	+	rs545230	C	A	SNV	c(-1, 8)	MYF6	jaspar2018	MA0667.1	MA0667.1	agcaaaacaAcacctgtgg	0.821345	0.918592	10.8606	12.1389	0.000347137	2.67029e-05	1	1.27827	0.0967729	strong
chr11	60869481	60869481	1	+	rs545230	C	A	SNV	c(-3, 10)	Tcf21	jaspar2018	MA0832.1	MA0832.1	tgctagcaaaacaAcacctgtggaaag	0.756099	0.82044	12.6434	13.7106	0.000578322	0.000101529	1	1.06718	0.0639456	strong
chr19	1020922	1020922	1	-	rs549163776	C	G	SNV	c(-8, 5)	Zfx	jaspar2018	MA0146.1	MA0146.1	ggtgcgaggcccgGgcgcgggggccgg	0.917505	0.989205	10.5372	11.3473	0.000284594	3.05474e-06	1	0.810131	0.0706349	strong
chr19	1020922	1020922	1	-	rs549163776	C	G	SNV	c(-8, 5)	Zfx	jaspar2018	MA0146.2	MA0146.2	ggtgcgaggcccgGgcgcgggggccgg	0.918382	0.98932	10.5951	11.4004	0.000285212	2.95043e-06	1	0.805262	0.0698913	strong
chr10	81045280	81045280	1	+	rs1250568	T	C	SNV	c(-4, 3)	EHF	jaspar2018	MA0598.1	MA0598.1	ctcacttCctgggcc	0.845155	0.99887	10.951	12.9423	0.000793457	3.05176e-05	1	1.99129	0.153685	strong
chr10	81045280	81045280	1	-	rs1250568	T	C	SNV	c(-5, 7)	ELF1	jaspar2018	MA0473.1	MA0473.1	cttctctcacttCctgggccccagt	0.81091	0.977215	9.88802	11.8869	0.0010722	2.563e-06	1	1.9989	0.164373	strong
chr10	81045280	81045280	1	-	rs1250568	T	C	SNV	c(-5, 6)	ELF4	jaspar2018	MA0641.1	MA0641.1	ttctctcacttCctgggccccag	0.717936	0.851005	10.7696	12.7405	0.00206369	8.95262e-05	1	1.97084	0.131854	strong
chr10	81045280	81045280	1	+	rs1250568	T	C	SNV	c(-5, 3)	ELF5	jaspar2018	MA0136.1	MA0136.1	tctcacttCctgggccc	0.713893	0.984424	4.93884	6.749	0.0170555	5.34058e-05	1	1.81015	0.264132	strong
chr10	81045280	81045280	1	-	rs1250568	T	C	SNV	c(-6, 4)	Erg	jaspar2018	MA0474.1	MA0474.1	tctctcacttCctgggcccca	0.795674	0.96549	9.45778	11.4569	0.00184083	3.09944e-05	1	1.9991	0.168513	strong
chr10	81045280	81045280	1	+	rs1250568	T	C	SNV	c(-7, 7)	Ets1	jaspar2018	MA0098.2	MA0098.2	tccttctctcacttCctgggccccagtgg	0.769697	0.942553	9.04862	11.0418	0.00215565	1.86674e-05	1	1.99319	0.170297	strong
chr10	81045280	81045280	1	-	rs1250568	T	C	SNV	c(-5, 4)	ETV6	jaspar2018	MA0645.1	MA0645.1	ctctcacttCctgggcccc	0.767425	0.940188	8.64454	10.5635	0.00308609	8.2016e-05	1	1.91896	0.17091	strong
chr10	81045280	81045280	1	-	rs1250568	T	C	SNV	c(-6, 4)	FLI1	jaspar2018	MA0475.1	MA0475.1	tctctcacttCctgggcccca	0.79804	0.973765	9.17194	11.1683	0.001688	5.96046e-06	1	1.99633	0.174104	strong
chr10	81045280	81045280	1	+	rs1250568	T	C	SNV	c(-14, 6)	IRF1	jaspar2018	MA0050.2	MA0050.2	tctgtgtccttctctcacttTctgggccccagtggccatgt	0.820727	0.720117	12.6829	11.1658	9.78438e-05	0.00135025	1	-1.51708	-0.0986004	strong
chr10	81045280	81045280	1	-	rs1250568	T	C	SNV	c(-15, 2)	IRF2	jaspar2018	MA0051.1	MA0051.1	gtgtccttctctcacttTctgggccccagtggcca	0.828171	0.717701	11.3987	9.93065	7.43801e-05	0.00130082	1	-1.46801	-0.107295	strong
chr10	81045280	81045280	1	+	rs1250568	T	C	SNV	c(-6, 3)	PRDM1	jaspar2018	MA0508.2	MA0508.2	ctctcacttTctgggcccc	0.972347	0.817374	12.0767	10.1713	5.91278e-05	0.00117302	1	-1.90538	-0.153453	strong
chr10	81045280	81045280	1	-	rs1250568	T	C	SNV	c(-6, 8)	Spi1	jaspar2018	MA0080.3	MA0080.3	tccttctctcacttCctgggccccagtgg	0.712723	0.882663	8.57992	10.5797	0.00460662	5.98757e-05	1	1.99974	0.167197	strong
chr10	81045280	81045280	1	-	rs1250568	T	C	SNV	c(-4, 2)	SPI1	jaspar2018	MA0080.2	MA0080.2	tcacttCctgggc	0.855021	1	6.7957	7.92911	0.000915527	0	1	1.13341	0.142943	strong
chr10	81045280	81045280	1	-	rs1250568	T	C	SNV	c(-7, 5)	ZBTB7A	jaspar2018	MA0750.2	MA0750.2	cttctctcacttCctgggccccagt	0.761865	0.936303	7.72209	9.43456	0.00255883	6.25402e-05	1	1.71247	0.170228	strong
chr12	6532785	6532785	1	-	rs56017594	G	A	SNV	c(-7, 3)	CEBPB	jaspar2018	MA0466.1	MA0466.1	acagtgctgcAataaacgtat	0.76093	0.931468	8.99079	10.9906	0.00331521	3.71933e-05	1	1.99983	0.169559	strong
chr12	6532785	6532785	1	+	rs56017594	G	A	SNV	c(-2, 7)	HOXA13	jaspar2018	MA0650.1	MA0650.1	cagtgctgcAataaacgta	0.894076	0.938254	8.7289	9.1544	0.000387192	6.67572e-05	1	0.425501	0.0436451	weak
chr19	1103953	1103953	1	-	rs566592153	T	A	SNV	c(-6, 7)	EGR1	jaspar2018	MA0162.3	MA0162.3	gctctggagggcgTggccgtgggaaag	0.83029	0.776705	15.2894	14.3075	6.80983e-05	0.000277836	1	-0.981899	-0.0533663	strong
chr19	1103953	1103953	1	-	rs566592153	T	A	SNV	c(-4, 6)	EGR2	jaspar2018	MA0472.2	MA0472.2	ctggagggcgTggccgtggga	0.863647	0.753579	12.016	10.4943	6.48499e-05	0.000926256	1	-1.52167	-0.109465	strong
chr19	1103953	1103953	1	-	rs566592153	T	A	SNV	c(-6, 8)	EGR3	jaspar2018	MA0732.1	MA0732.1	cgctctggagggcgTggccgtgggaaagg	0.832491	0.786779	13.8842	13.1294	9.20268e-05	0.000293994	1	-0.754844	-0.0453352	strong
chr19	1103953	1103953	1	-	rs566592153	T	A	SNV	c(-6, 4)	Klf1	jaspar2018	MA0493.1	MA0493.1	ctggagggcgTggccgtggga	0.942687	0.867961	11.206	10.3244	1.97887e-05	0.000262737	1	-0.88157	-0.074193	strong
chr19	1103953	1103953	1	-	rs566592153	T	A	SNV	c(-10, 4)	Klf12	jaspar2018	MA0742.1	MA0742.1	cgctctggagggcgTggccgtgggaaagg	0.993215	0.877594	14.8418	13.126	4.45172e-07	4.33614e-05	1	-1.71575	-0.114824	strong
chr19	1103953	1103953	1	-	rs566592153	T	A	SNV	c(-12, 5)	KLF13	jaspar2018	MA0657.1	MA0657.1	gagcgctctggagggcgTggccgtgggaaaggagg	0.820715	0.710525	14.7249	12.778	4.12509e-05	0.00092894	1	-1.94692	-0.108811	strong
chr19	1103953	1103953	1	-	rs566592153	T	A	SNV	c(-9, 4)	KLF14	jaspar2018	MA0740.1	MA0740.1	gctctggagggcgTggccgtgggaaag	0.953213	0.862293	13.3092	12.0511	3.27826e-06	8.61771e-05	1	-1.25803	-0.0901392	strong
chr19	1103953	1103953	1	-	rs566592153	T	A	SNV	c(-7, 3)	KLF16	jaspar2018	MA0741.1	MA0741.1	ctggagggcgTggccgtggga	0.943829	0.881015	10.7714	10.0626	1.43051e-05	0.000139952	1	-0.708849	-0.0621506	strong
chr19	1103953	1103953	1	-	rs566592153	T	A	SNV	c(-8, 4)	KLF9	jaspar2018	MA1107.1	MA1107.1	ctctggagggcgTggccgtgggaaa	0.914137	0.784542	10.6272	9.15406	6.38664e-05	0.00116365	1	-1.47312	-0.126958	strong
chr19	1103953	1103953	1	-	rs566592153	T	A	SNV	c(-6, 12)	RFX2	jaspar2018	MA0600.1	MA0600.1	tgagcgctctggagggcgTggccgtgggaaaggaggc	0.806395	0.687668	11.0131	9.425	9.85337e-05	0.00222719	1	-1.5881	-0.116748	strong
chr19	1103953	1103953	1	-	rs566592153	T	A	SNV	c(-7, 3)	SP3	jaspar2018	MA0746.1	MA0746.1	ctggagggcgTggccgtggga	0.977087	0.899762	8.3155	7.674	9.53674e-06	0.000217676	1	-0.641506	-0.0754217	weak
chr19	1103953	1103953	1	-	rs566592153	T	A	SNV	c(-10, 6)	SP4	jaspar2018	MA0685.1	MA0685.1	agcgctctggagggcgTggccgtgggaaaggag	0.926445	0.875405	16.2359	15.3476	1.64757e-06	1.24648e-05	1	-0.8883	-0.0507135	strong
chr19	1103953	1103953	1	-	rs566592153	T	A	SNV	c(-8, 3)	SP8	jaspar2018	MA0747.1	MA0747.1	tctggagggcgTggccgtgggaa	0.954432	0.862365	9.25072	8.37319	5.84126e-06	0.000192642	1	-0.877535	-0.090607	strong
chr19	1103953	1103953	1	-	rs566592153	T	A	SNV	c(-1, 12)	Zfx	jaspar2018	MA0146.2	MA0146.2	gctctggagggcgAggccgtgggaaag	0.819451	0.956627	9.47211	11.0293	0.00106514	7.65063e-05	1	1.55717	0.135151	strong
chr19	1103953	1103953	1	-	rs566592153	T	A	SNV	c(-1, 12)	Zfx	jaspar2018	MA0146.1	MA0146.1	gctctggagggcgAggccgtgggaaag	0.81871	0.95628	9.4209	10.9753	0.0010788	7.66553e-05	1	1.55438	0.135526	strong
chr19	1192248	1192248	1	+	rs572443108	C	T	SNV	c(-3, 15)	Nr1h3::Rxra	jaspar2018	MA0494.1	MA0494.1	ctggtctcgaactgctggCctcaagtgatcctccctc	0.89354	0.819646	9.39719	8.63492	7.97393e-06	0.000124919	1	-0.76227	-0.0726289	strong
chr19	1192248	1192248	1	-	rs572443108	C	T	SNV	c(-3, 13)	Rarg(var.2)	jaspar2018	MA0860.1	MA0860.1	ggtctcgaactgctggCctcaagtgatcctccc	0.75805	0.692402	18.0908	16.5344	6.47333e-05	0.000439885	1	-1.55641	-0.0653209	strong
chr22	39708357	39708357	1	-	rs5757611	C	T	SNV	c(-9, 8)	MAFF	jaspar2018	MA0495.1	MA0495.1	actaggcttccagctgcTgagccggggaagtccct	0.751127	0.919715	8.81191	10.7288	0.00346159	9.58275e-05	1	1.91692	0.16466	strong
chr22	39708357	39708357	1	-	rs5757611	C	T	SNV	c(-9, -1)	TFAP4	jaspar2018	MA0691.1	MA0691.1	tccagctgcTgagccgggg	0.890898	0.93068	11.7134	12.2314	0.000219345	8.96454e-05	1	0.51799	0.039439	weak
chr2	43361389	43361389	1	+	rs62135412	C	T	SNV	c(-1, 9)	STAT3	jaspar2018	MA0144.2	MA0144.2	gaagttcagaTgctaggaagg	0.785028	0.937674	8.95182	10.6846	0.00203252	5.72205e-05	1	1.7328	0.152105	strong
chr13	99867699	99867699	1	+	rs62620186	A	G	SNV	c(-6, 6)	ASCL1	jaspar2018	MA1100.1	MA1100.1	ccaccaccagcaGttgtagccttga	0.747146	0.880272	9.0409	10.6239	0.00180921	9.68277e-05	1	1.58303	0.131398	strong
chr13	99867699	99867699	1	-	rs62620186	A	G	SNV	c(-9, 4)	Tcf21	jaspar2018	MA0832.1	MA0832.1	accaccaccagcaGttgtagccttgat	0.703794	0.82128	11.7759	13.7245	0.00175475	9.7625e-05	1	1.94864	0.116763	strong
chr2	71016602	71016602	1	+	rs6546636	T	C	SNV	c(-2, 8)	HOXC13	jaspar2018	MA0907.1	MA0907.1	agtctagtacTggtaaaagag	0.904856	0.771109	11.8516	10.1146	4.17233e-05	0.00121617	1	-1.73705	-0.132727	strong
chr2	102754809	102754809	1	-	rs6706048	G	C	SNV	c(-4, 9)	RORA(var.2)	jaspar2018	MA0072.1	MA0072.1	ttgccttcactgaCcaagattcaagct	0.786488	0.911752	11.3006	13.0762	0.000744343	3.13073e-05	1	1.77559	0.123932	strong
chr2	102754809	102754809	1	-	rs6706048	G	C	SNV	c(-3, 8)	RORC	jaspar2018	MA1151.1	MA1151.1	gccttcactgaCcaagattcaag	0.717233	0.922057	5.725	7.3149	0.00763333	7.37309e-05	1	1.5899	0.200747	strong
chr3	71199965	71199965	1	-	rs12633797	A	G	SNV	c(-6, 1)	ISL2	jaspar2018	MA0914.1	MA0914.1	gttaagtGtgtggca	0.858267	0.982907	5.28294	6.0267	0.00134277	7.62939e-05	1	0.74376	0.121357	strong
chr3	71199965	71199965	1	-	rs12633797	A	G	SNV	c(-6, 2)	Nkx3-1	jaspar2018	MA0124.2	MA0124.2	cgttaagtGtgtggcat	0.823492	0.965207	8.5812	10.0389	0.00141907	9.91821e-05	1	1.45774	0.14021	strong
chr3	71199965	71199965	1	-	rs12633797	A	G	SNV	c(-6, 2)	NKX3-2	jaspar2018	MA0122.2	MA0122.2	cgttaagtGtgtggcat	0.842714	0.98374	7.83622	9.12848	0.00113297	8.39233e-05	1	1.29226	0.13929	strong
chr11	61658629	61658629	1	-	rs693672	T	C	SNV	c(-6, 14)	IRF3	jaspar2018	MA1418.1	MA1418.1	gccggtgggtggcttccttaCggcttccttaccgtggcgtc	0.663734	0.75006	14.3303	16.1638	0.00111046	9.98207e-05	1	1.83345	0.0853873	strong
chr10	90762376	90762376	1	+	rs7069750	G	C	SNV	c(-7, 11)	REST	jaspar2018	MA0138.1	MA0138.1	ggcatgtatttgttatgtCccaggttctgtgctaaca	0.765526	0.818903	13.3519	14.258	3.86075e-05	5.24386e-06	1	0.906072	0.0522771	strong
chr10	90762376	90762376	1	-	rs7069750	G	C	SNV	c(-8, 12)	REST	jaspar2018	MA0138.2	MA0138.2	tgggcatgtatttgttatgtCccaggttctgtgctaacagc	0.732672	0.823895	15.0291	16.8463	0.000114306	4.45094e-06	1	1.81724	0.0892797	strong
chr19	1192505	1192505	1	+	rs7252287	G	A	SNV	c(-3, 5)	CDX1	jaspar2018	MA0878.1	MA0878.1	cccgtgtcAtaaaactg	0.818733	0.979215	6.31795	7.53165	0.0029335	4.57764e-05	1	1.2137	0.157852	strong
chr19	1192505	1192505	1	+	rs7252287	G	A	SNV	c(-5, 5)	CDX2	jaspar2018	MA0465.1	MA0465.1	ttcccgtgtcAtaaaactgaa	0.803673	0.966843	9.86993	11.8621	0.00135207	2.5034e-05	1	1.99214	0.1624	strong
chr19	1192505	1192505	1	+	rs7252287	G	A	SNV	c(-4, 6)	HOXA10	jaspar2018	MA0899.1	MA0899.1	ttcccgtgtcAtaaaactgaa	0.850349	0.979691	6.27032	7.19253	0.00171137	9.77516e-06	1	0.922209	0.125687	strong
chr19	1192505	1192505	1	+	rs7252287	G	A	SNV	c(-4, 7)	Hoxa11	jaspar2018	MA0911.1	MA0911.1	attcccgtgtcGtaaaactgaag	0.995844	0.94243	9.69984	9.1857	6.55651e-07	5.85914e-05	1	-0.514143	-0.0527876	weak
chr19	1192505	1192505	1	+	rs7252287	G	A	SNV	c(-4, 6)	HOXC11	jaspar2018	MA0651.1	MA0651.1	ttcccgtgtcGtaaaactgaa	0.994775	0.921861	11.1781	10.366	2.38419e-06	9.20296e-05	1	-0.812081	-0.072273	strong
chr19	1192505	1192505	1	+	rs7252287	G	A	SNV	c(-4, 6)	HOXC12	jaspar2018	MA0906.1	MA0906.1	ttcccgtgtcGtaaaactgaa	0.986715	0.884814	12.9904	11.6572	2.38419e-06	8.4877e-05	1	-1.33317	-0.101273	strong
chr19	1192505	1192505	1	+	rs7252287	G	A	SNV	c(-4, 6)	HOXC13	jaspar2018	MA0907.1	MA0907.1	ttcccgtgtcGtaaaactgaa	0.900077	0.833762	11.7896	10.9283	4.62532e-05	0.000265121	1	-0.861263	-0.065809	strong
chr19	1192505	1192505	1	+	rs7252287	G	A	SNV	c(-3, 6)	HOXD11	jaspar2018	MA0908.1	MA0908.1	tcccgtgtcGtaaaactga	0.997977	0.936676	10.7534	10.0968	1.90735e-06	6.48499e-05	1	-0.656645	-0.0609409	weak
chr19	1192505	1192505	1	+	rs7252287	G	A	SNV	c(-4, 6)	HOXD12	jaspar2018	MA0873.1	MA0873.1	ttcccgtgtcGtaaaactgaa	0.985949	0.903745	12.6068	11.5603	2.6226e-06	6.79493e-05	1	-1.04643	-0.081844	strong
chr19	1192505	1192505	1	+	rs7252287	G	A	SNV	c(-3, 6)	HOXD13	jaspar2018	MA0909.1	MA0909.1	tcccgtgtcAtaaaactga	0.813562	0.942408	8.69117	10.0535	0.00150681	6.77109e-05	1	1.36237	0.127772	strong
chr10	75670448	75670448	1	+	rs72816319	C	T	SNV	c(-9, 5)	Sox2	jaspar2018	MA0143.1	MA0143.1	tcgtacatttgtcgTgttgatgaagactt	0.750345	0.851153	7.61298	8.58375	0.00139477	6.39884e-05	1	0.970773	0.0969111	strong
chr10	75670448	75670448	1	+	rs72816319	C	T	SNV	c(-9, 5)	Sox2	jaspar2018	MA0143.2	MA0143.2	tcgtacatttgtcgTgttgatgaagactt	0.750463	0.852005	7.68294	8.67046	0.00139378	6.26864e-05	1	0.987518	0.0976798	strong
chr6	128294055	128294055	1	+	rs72975916	C	T	SNV	c(-1, 7)	JDP2	jaspar2018	MA0655.1	MA0655.1	ccccacaaTgtctcatt	0.739744	0.873369	10.5594	12.4623	0.00186539	8.7738e-05	1	1.9029	0.133391	strong
chr6	128294055	128294055	1	+	rs72975916	C	T	SNV	c(-2, 8)	NFE2	jaspar2018	MA0841.1	MA0841.1	gtccccacaaTgtctcatttt	0.739953	0.864901	11.8113	13.8019	0.0015173	9.20296e-05	1	1.99059	0.124769	strong
chr6	128294055	128294055	1	-	rs72975916	C	T	SNV	c(-5, 3)	Sox17	jaspar2018	MA0078.1	MA0078.1	ccccacaaTgtctcatt	0.804646	0.984746	6.93533	8.46457	0.00325012	9.91821e-05	1	1.52924	0.177941	strong
chr8	129567077	129567077	1	+	rs74480402	T	C	SNV	c(-16, -1)	Hmx2	jaspar2018	MA0897.1	MA0897.1	gaaaacatttaaaataTctaaacagtgattcct	0.879892	0.834909	10.4399	9.92286	4.1967e-05	0.000160809	1	-0.51703	-0.0437405	weak
chr10	75751739	75751739	1	-	rs75118385	G	A	SNV	c(-3, 7)	Klf1	jaspar2018	MA0493.1	MA0493.1	tgtttggaggGtggggcatgg	0.93693	0.769225	11.1381	9.15958	2.76566e-05	0.00215077	1	-1.97847	-0.166508	strong
chr10	75751739	75751739	1	+	rs75118385	G	A	SNV	c(-3, 6)	Klf4	jaspar2018	MA0039.2	MA0039.2	gtttggaggGtggggcatg	0.997834	0.829803	10.9841	9.15558	9.53674e-07	0.00104332	1	-1.82855	-0.166115	strong
chr10	75751739	75751739	1	-	rs75118385	G	A	SNV	c(-3, 6)	KLF5	jaspar2018	MA0599.1	MA0599.1	gtttggaggGtggggcatg	0.99547	0.820849	11.4295	9.43058	2.86102e-06	0.0013628	1	-1.99891	-0.1741	strong
chr10	75751739	75751739	1	-	rs75118385	G	A	SNV	c(-4, 6)	SP1	jaspar2018	MA0079.3	MA0079.3	tgtttggaggGtggggcatgg	0.937677	0.765584	10.9443	8.94594	2.83718e-05	0.00293159	1	-1.99835	-0.171268	strong
chr2	71050144	71050144	1	+	rs7575872	C	T	SNV	c(-5, 4)	Myc	jaspar2018	MA0147.2	MA0147.2	tgtgccatgTgtggctgat	0.7949	0.966312	9.30431	11.3017	0.00214958	7.82013e-05	1	1.9974	0.170802	strong
chr2	71050144	71050144	1	-	rs7575872	C	T	SNV	c(-6, 12)	PAX5	jaspar2018	MA0014.2	MA0014.2	ggaggagcctgtgccatgCgtggctgatgtcaacccg	0.851293	0.753156	7.95526	7.0642	1.28605e-05	0.000464861	1	-0.89106	-0.0957564	strong
chr2	71050144	71050144	1	-	rs7575872	C	T	SNV	c(-8, 9)	SRF	jaspar2018	MA0083.2	MA0083.2	gaggagcctgtgccatgTgtggctgatgtcaaccc	0.729033	0.867367	9.52021	11.288	0.00223303	7.72214e-05	1	1.76783	0.136165	strong
chr11	128170703	128170703	1	+	rs12807383	A	T	SNV	c(-11, -1)	FOXI1	jaspar2018	MA0042.1	MA0042.1	gtatgttttttTaaaaaaatgtt	0.893085	0.953332	8.90863	9.49847	0.000438452	5.33462e-05	1	0.589839	0.0592484	weak
chr19	1087834	1087834	1	-	rs76162940	C	T	SNV	c(-3, 5)	Creb3l2	jaspar2018	MA0608.1	MA0608.1	gagaaccaCgtggctag	0.989875	0.823698	11.6254	9.67678	3.8147e-06	0.00087738	1	-1.94865	-0.165925	strong
chr19	1087834	1087834	1	+	rs76162940	C	T	SNV	c(-4, 5)	HEY1	jaspar2018	MA0823.1	MA0823.1	agagaaccaCgtggctagg	0.970852	0.791377	10.9452	8.94871	5.53131e-05	0.00292778	1	-1.99647	-0.177158	strong
chr19	1087834	1087834	1	-	rs76162940	C	T	SNV	c(-4, 5)	HEY2	jaspar2018	MA0649.1	MA0649.1	agagaaccaCgtggctagg	0.965658	0.820074	10.4145	8.86755	5.14984e-05	0.00103092	1	-1.54697	-0.143511	strong
chr19	1087834	1087834	1	+	rs76162940	C	T	SNV	c(-5, 4)	MAX	jaspar2018	MA0058.1	MA0058.1	agagaaccaCgtggctagg	0.999648	0.848954	9.63344	8.20835	1.90735e-06	0.000614166	1	-1.42509	-0.14788	strong
chr19	1087834	1087834	1	-	rs76162940	C	T	SNV	c(-3, 6)	MAX	jaspar2018	MA0058.2	MA0058.2	agagaaccaTgtggctagg	0.928693	0.982629	11.1176	11.7593	0.000244141	1.33514e-05	1	0.641663	0.0536242	weak
chr19	1087834	1087834	1	+	rs76162940	C	T	SNV	c(-4, 5)	MAX	jaspar2018	MA0058.3	MA0058.3	agagaaccaCgtggctagg	0.999036	0.855035	10.8427	9.2901	4.76837e-06	0.000307083	1	-1.55255	-0.143052	strong
chr19	1087834	1087834	1	+	rs76162940	C	T	SNV	c(-5, 5)	MAX::MYC	jaspar2018	MA0059.1	MA0059.1	gagagaaccaCgtggctaggt	0.977838	0.855442	10.6563	9.3539	4.29153e-06	0.00020051	1	-1.3024	-0.119573	strong
chr19	1087834	1087834	1	+	rs76162940	C	T	SNV	c(-6, 6)	MXI1	jaspar2018	MA1108.1	MA1108.1	gtgagagaaccaCgtggctaggtta	0.993428	0.84951	10.3502	8.87424	1.79261e-05	0.000267968	1	-1.47597	-0.14168	strong
chr19	1087834	1087834	1	+	rs76162940	C	T	SNV	c(-4, 5)	Myc	jaspar2018	MA0147.1	MA0147.1	agagaaccaCgtggctagg	0.98249	0.854474	9.50576	8.2791	1.62125e-05	0.000495911	1	-1.22667	-0.126806	strong
chr19	1087834	1087834	1	-	rs76162940	C	T	SNV	c(-5, 6)	MYC	jaspar2018	MA0147.3	MA0147.3	tgagagaaccaCgtggctaggtt	0.985573	0.857209	10	8.72331	2.0802e-05	0.000375926	1	-1.27672	-0.125866	strong
chr19	1087834	1087834	1	-	rs76162940	C	T	SNV	c(-2, 5)	Mycn	jaspar2018	MA0104.3	MA0104.3	agaaccaCgtggcta	1	0.909857	12.3887	11.2744	0	0.000213623	1	-1.11429	-0.0899442	strong
chr19	1087834	1087834	1	+	rs76162940	C	T	SNV	c(-4, 5)	Mycn	jaspar2018	MA0104.2	MA0104.2	agagaaccaCgtggctagg	0.997593	0.835006	9.67396	8.12103	2.86102e-06	0.00106239	1	-1.55293	-0.160147	strong
chr19	1087834	1087834	1	+	rs76162940	C	T	SNV	c(-5, 6)	MYCN	jaspar2018	MA0104.4	MA0104.4	tgagagaaccaCgtggctaggtt	0.99775	0.86624	10.7619	9.36707	5.00679e-06	0.000345707	1	-1.39483	-0.129322	strong
chr19	1087834	1087834	1	+	rs76162940	C	T	SNV	c(-4, 5)	TFE3	jaspar2018	MA0831.1	MA0831.1	agagaaccaCgtggctagg	0.970124	0.862692	7.90465	7.04816	7.43866e-05	0.00182343	1	-0.856484	-0.105183	strong
chr19	1087834	1087834	1	+	rs76162940	C	T	SNV	c(-4, 5)	TFEB	jaspar2018	MA0692.1	MA0692.1	agagaaccaCgtggctagg	0.954517	0.873571	9.43568	8.64698	4.76837e-05	0.000494957	1	-0.788697	-0.0798371	strong
chr19	1087834	1087834	1	-	rs76162940	C	T	SNV	c(-3, 3)	USF1	jaspar2018	MA0093.1	MA0093.1	gaaccaCgtggct	1	0.868209	9.5877	8.33715	0	0.000244141	1	-1.25055	-0.130433	strong
chr19	1087834	1087834	1	-	rs76162940	C	T	SNV	c(-6, 9)	USF2	jaspar2018	MA0526.2	MA0526.2	actgtgagagaaccaCgtggctaggttaaac	0.909276	0.805942	11.9006	10.5669	4.52953e-05	0.000570696	1	-1.33365	-0.102027	strong
chr9	93974553	93974553	1	+	rs773507	G	T	SNV	c(-13, 1)	IRF4	jaspar2018	MA1419.1	MA1419.1	accgatactgaaagTaaaatcaagagaaa	0.776755	0.798963	17.0791	17.5654	6.10519e-05	3.4499e-05	1	0.486299	0.022137	weak
chr9	93974553	93974553	1	+	rs773507	G	T	SNV	c(-13, -1)	IRF7	jaspar2018	MA0772.1	MA0772.1	ccgatactgaaagTaaaatcaagagaa	0.819977	0.850434	13.1255	13.607	0.000134282	5.72279e-05	1	0.481479	0.0301464	weak
chr9	93974553	93974553	1	+	rs773507	G	T	SNV	c(-13, -1)	IRF8	jaspar2018	MA0652.1	MA0652.1	ccgatactgaaagTaaaatcaagagaa	0.787629	0.825329	16.8148	17.6185	5.52535e-05	1.50949e-05	1	0.803784	0.0376609	strong
chr9	93974553	93974553	1	+	rs773507	G	T	SNV	c(-14, -1)	IRF9	jaspar2018	MA0653.1	MA0653.1	accgatactgaaagTaaaatcaagagaaa	0.788611	0.813901	18.6301	19.2254	2.38735e-05	1.03954e-05	1	0.595345	0.0252196	weak
chr9	93974553	93974553	1	+	rs773507	G	T	SNV	c(-12, 2)	PRDM1	jaspar2018	MA0508.1	MA0508.1	accgatactgaaagTaaaatcaagagaaa	0.81125	0.855347	10.751	11.3218	0.000221567	6.24694e-05	1	0.570843	0.0432642	weak
chr9	93974553	93974553	1	-	rs773507	G	T	SNV	c(-7, 2)	PRDM1	jaspar2018	MA0508.2	MA0508.2	tactgaaagTaaaatcaag	0.806957	0.965596	10.0432	11.9937	0.00211811	9.25064e-05	1	1.95046	0.157084	strong
chr2	43787107	43787107	1	+	rs77888770	T	C	SNV	c(-4, 4)	CDX1	jaspar2018	MA0878.1	MA0878.1	gtaaacaaTaaaaccta	0.987038	0.72994	7.59082	5.64643	2.28882e-05	0.0117798	1	-1.94439	-0.252885	strong
chr2	43787107	43787107	1	+	rs77888770	T	C	SNV	c(-6, 4)	CDX2	jaspar2018	MA0465.1	MA0465.1	ttgtaaacaaTaaaacctacc	0.955647	0.792477	11.7254	9.73323	4.41074e-05	0.00163817	1	-1.99214	-0.1624	strong
chr2	43787107	43787107	1	+	rs77888770	T	C	SNV	c(-5, 5)	HOXA10	jaspar2018	MA0899.1	MA0899.1	ttgtaaacaaTaaaacctacc	0.964282	0.731805	7.08266	5.4251	4.64916e-05	0.0104861	1	-1.65756	-0.225908	strong
chr2	43787107	43787107	1	+	rs77888770	T	C	SNV	c(-4, 5)	HOXA13	jaspar2018	MA0650.1	MA0650.1	tgtaaacaaTaaaacctac	0.965572	0.76088	9.41751	7.44601	2.00272e-05	0.00426579	1	-1.9715	-0.202223	strong
chr2	43787107	43787107	1	+	rs77888770	T	C	SNV	c(-4, 5)	HOXB13	jaspar2018	MA0901.1	MA0901.1	tgtaaacaaTaaaacctac	0.949403	0.767238	10.3367	8.3747	2.86102e-05	0.00245953	1	-1.96204	-0.180307	strong
chr2	43787107	43787107	1	+	rs77888770	T	C	SNV	c(-4, 5)	HOXD13	jaspar2018	MA0909.1	MA0909.1	tgtaaacaaTaaaacctac	0.963478	0.77729	10.2763	8.30764	2.28882e-05	0.00285912	1	-1.96868	-0.184636	strong
chr2	43787107	43787107	1	+	rs77888770	T	C	SNV	c(-4, 5)	Hoxd9	jaspar2018	MA0913.1	MA0913.1	tgtaaacaaTaaaacctac	0.962187	0.803872	6.68443	5.60904	2.19345e-05	0.00320721	1	-1.07539	-0.154927	strong
chr2	43787107	43787107	1	+	rs77888770	T	C	SNV	c(-8, -1)	SRY	jaspar2018	MA0084.1	MA0084.1	gtaaacaaTaaaaccta	1	0.9267	6.96517	6.46573	0	0.000812531	1	-0.499442	-0.0717057	weak
chr11	60753960	60753960	1	+	rs78601160	C	T	SNV	c(-5, 2)	E2F1	jaspar2018	MA0024.1	MA0024.1	gcttttgCgctctag	0.954331	0.800488	8.8846	7.49111	3.05176e-05	0.00112915	1	-1.39348	-0.149865	strong
chr19	1067927	1067927	1	-	rs79119189	C	T	SNV	c(-5, 9)	RFX5	jaspar2018	MA0510.1	MA0510.1	aggttggggagtgtTcccaggcctggggt	0.842805	0.912287	9.17833	9.92704	0.000407396	4.26816e-05	1	0.748708	0.0688645	strong
chr19	1067927	1067927	1	+	rs79119189	C	T	SNV	c(-5, 9)	TFAP2C	jaspar2018	MA0524.1	MA0524.1	aggttggggagtgtCcccaggcctggggt	0.946274	0.75526	10.0677	8.0685	4.33372e-05	0.00478331	1	-1.99917	-0.188069	strong
chr1	67699915	67699915	1	-	rs79755370	C	A	SNV	c(-3, 6)	Atoh1	jaspar2018	MA0461.2	MA0461.2	gtttcagtcAtatgtctaa	0.809262	0.977932	8.1127	9.7845	0.00230694	5.05447e-05	1	1.67181	0.167126	strong
chr1	67699915	67699915	1	+	rs79755370	C	A	SNV	c(-2, 5)	Bhlha15	jaspar2018	MA0607.1	MA0607.1	ttcagtcAtatgtct	0.782442	0.967749	8.39822	10.3862	0.00378418	7.62939e-05	1	1.98798	0.185235	strong
chr1	67699915	67699915	1	-	rs79755370	C	A	SNV	c(-3, 6)	NEUROD2	jaspar2018	MA0668.1	MA0668.1	gtttcagtcAtatgtctaa	0.846163	0.961123	7.46265	8.46965	0.00092411	8.67844e-05	1	1.00701	0.1143	strong
chr1	67699915	67699915	1	-	rs79755370	C	A	SNV	c(-3, 6)	NEUROG2	jaspar2018	MA0669.1	MA0669.1	gtttcagtcAtatgtctaa	0.824532	0.964076	10.6851	12.4899	0.000489235	8.58307e-06	1	1.8048	0.139319	strong
chr1	67699915	67699915	1	+	rs79755370	C	A	SNV	c(-3, 6)	Twist2	jaspar2018	MA0633.1	MA0633.1	gtttcagtcAtatgtctaa	0.790449	0.975336	8.59549	10.5835	0.0030365	4.95911e-05	1	1.98797	0.183245	strong
chr21	45616497	45616497	1	+	rs8134436	C	G	SNV	c(-6, 6)	ASCL1	jaspar2018	MA1100.1	MA1100.1	ggacacagagcaGctgttcctctgg	0.858508	0.986473	10.3651	11.8868	0.000290811	9.22382e-06	1	1.52167	0.126305	strong
chr21	45616497	45616497	1	-	rs8134436	C	G	SNV	c(-4, 5)	Ascl2	jaspar2018	MA0816.1	MA0816.1	cacagagcaGctgttcctc	0.891588	0.99349	10.1929	11.3448	0.000246048	9.53674e-07	1	1.1519	0.100881	strong
chr21	45616497	45616497	1	+	rs8134436	C	G	SNV	c(-4, 5)	FIGLA	jaspar2018	MA0820.1	MA0820.1	cacagagcaCctgttcctc	0.992017	0.91837	9.05146	8.38824	1.43051e-05	0.000258446	1	-0.663213	-0.072694	weak
chr21	45616497	45616497	1	+	rs8134436	C	G	SNV	c(-4, 5)	ID4	jaspar2018	MA0824.1	MA0824.1	cacagagcaCctgttcctc	0.993275	0.867386	10.5483	9.21875	4.3869e-05	0.000267982	1	-1.32953	-0.125199	strong
chr21	45616497	45616497	1	-	rs8134436	C	G	SNV	c(-4, 5)	MSC	jaspar2018	MA0665.1	MA0665.1	cacagagcaGctgttcctc	0.857878	0.948043	11.1298	12.292	8.7738e-05	3.8147e-06	1	1.16221	0.0896653	strong
chr21	45616497	45616497	1	+	rs8134436	C	G	SNV	c(-4, 8)	Myod1	jaspar2018	MA0499.1	MA0499.1	ggacacagagcaGctgttcctctgg	0.952168	0.999121	11.248	11.7998	0.000118792	4.91738e-07	1	0.55176	0.0467194	weak
chr21	45616497	45616497	1	-	rs8134436	C	G	SNV	c(-5, 5)	Myog	jaspar2018	MA0500.1	MA0500.1	acacagagcaGctgttcctct	0.920731	0.997116	11.0921	12.0092	0.00025034	6.19888e-06	1	0.917098	0.0761467	strong
chr21	45616497	45616497	1	+	rs8134436	C	G	SNV	c(-5, 6)	NHLH1	jaspar2018	MA0048.1	MA0048.1	gacacagagcaGctgttcctctg	0.791338	0.902431	9.44117	10.7463	0.000861824	7.30157e-05	1	1.30518	0.109747	strong
chr21	45616497	45616497	1	-	rs8134436	C	G	SNV	c(-4, 5)	NHLH1	jaspar2018	MA0048.2	MA0048.2	cacagagcaGctgttcctc	0.854239	0.932289	10.2796	11.2086	0.00039196	3.91006e-05	1	0.929046	0.0773263	strong
chr21	45616497	45616497	1	-	rs8134436	C	G	SNV	c(-5, 9)	SCRT1	jaspar2018	MA0743.1	MA0743.1	agggacacagagcaCctgttcctctggcc	0.877434	0.754974	14.3099	12.3317	2.96375e-05	0.000748062	1	-1.97813	-0.121434	strong
chr21	45616497	45616497	1	-	rs8134436	C	G	SNV	c(-3, 9)	SCRT2	jaspar2018	MA0744.1	MA0744.1	ggacacagagcaCctgttcctctgg	0.874492	0.761283	14.5764	12.7024	3.39597e-05	0.000617459	1	-1.87405	-0.112528	strong
chr21	45616497	45616497	1	-	rs8134436	C	G	SNV	c(-5, 5)	Tcf12	jaspar2018	MA0521.1	MA0521.1	acacagagcaGctgttcctct	0.925283	0.999218	11.2552	12.1515	0.000184774	1.19209e-06	1	0.896294	0.0737024	strong
chr21	45616497	45616497	1	-	rs8134436	C	G	SNV	c(-6, 7)	Tcf21	jaspar2018	MA0832.1	MA0832.1	gggacacagagcaGctgttcctctggc	0.812573	0.922565	13.5801	15.4045	0.000164039	8.21799e-06	1	1.82435	0.109316	strong
chr21	45616497	45616497	1	-	rs8134436	C	G	SNV	c(-5, 5)	Tcf3	jaspar2018	MA0522.1	MA0522.1	acacagagcaGctgttcctct	0.885426	0.988998	10.3352	11.5373	0.000595331	1.12057e-05	1	1.20213	0.103054	strong
chr21	45616497	45616497	1	+	rs8134436	C	G	SNV	c(-4, 5)	TCF3	jaspar2018	MA0522.2	MA0522.2	cacagagcaCctgttcctc	0.995844	0.919447	10.6326	9.81979	4.57764e-05	0.000244141	1	-0.812819	-0.0761292	strong
chr21	45616497	45616497	1	+	rs8134436	C	G	SNV	c(-4, 5)	TCF4	jaspar2018	MA0830.1	MA0830.1	cacagagcaCctgttcctc	0.99637	0.912433	11.0939	10.162	3.05176e-05	0.000274658	1	-0.931971	-0.0837031	strong
chr21	45616497	45616497	1	-	rs8134436	C	G	SNV	c(-4, 5)	TFAP4	jaspar2018	MA0691.1	MA0691.1	cacagagcaGctgttcctc	0.848084	0.982958	11.1559	12.912	0.000284195	5.72205e-06	1	1.75614	0.13371	strong
chr6	32632885	32632885	1	+	rs9274412	G	A	SNV	c(-2, 13)	GLIS1	jaspar2018	MA0735.1	MA0735.1	tcaggccccagcccgAccgcccccgcagccg	0.724095	0.805613	17.5203	19.4881	0.000231423	1.9256e-05	1	1.96779	0.0813793	strong
chr6	32632885	32632885	1	+	rs9274412	G	A	SNV	c(-1, 12)	GLIS3	jaspar2018	MA0737.1	MA0737.1	aggccccagcccgAccgcccccgcagc	0.706032	0.791238	13.6691	15.3132	0.000620622	5.70342e-05	1	1.64413	0.0850057	strong
chr6	149866452	149866452	1	-	rs9404042	G	A	SNV	c(-6, 8)	Pou5f1::Sox2	jaspar2018	MA0142.1	MA0142.1	ctcttctggtttccAtggcaacttacaca	0.671816	0.818747	8.1705	9.89302	0.00384062	9.92576e-05	1	1.72252	0.143329	strong
chr6	149866452	149866452	1	-	rs9404042	G	A	SNV	c(-7, 8)	RFX2	jaspar2018	MA0600.2	MA0600.2	cctcttctggtttccAtggcaacttacacat	0.88303	0.980359	15.9652	17.7158	2.66754e-06	1.55997e-08	1	1.75062	0.0968846	strong
chr6	149866452	149866452	1	+	rs9404042	G	A	SNV	c(-6, 12)	RFX2	jaspar2018	MA0600.1	MA0600.1	cgccctcttctggtttccAtggcaacttacacattct	0.95427	0.987109	12.9911	13.4304	1.42827e-07	1.47702e-08	1	0.439262	0.032292	weak
chr6	149866452	149866452	1	-	rs9404042	G	A	SNV	c(-7, 8)	RFX3	jaspar2018	MA0798.1	MA0798.1	cctcttctggtttccAtggcaacttacacat	0.901344	0.989085	12.8589	14.0961	2.13762e-06	1.14087e-08	1	1.23721	0.0868214	strong
chr6	149866452	149866452	1	+	rs9404042	G	A	SNV	c(-7, 8)	RFX4	jaspar2018	MA0799.1	MA0799.1	cctcttctggtttccAtggcaacttacacat	0.934753	0.987523	11.9177	12.58	1.09593e-06	1.83936e-08	1	0.662266	0.0519972	weak
chr6	149866452	149866452	1	-	rs9404042	G	A	SNV	c(-7, 8)	RFX5	jaspar2018	MA0510.2	MA0510.2	cctcttctggtttccAtggcaacttacacat	0.912115	0.976712	16.7032	17.8762	5.248e-07	1.90921e-08	1	1.17309	0.064106	strong
chr1	192519865	192519865	1	-	rs1323298	T	C	SNV	c(-9, 1)	CEBPB	jaspar2018	MA0466.1	MA0466.1	aatcatgcaaTtacccaggag	0.93337	0.884555	11.0129	10.4405	3.38554e-05	0.000242233	1	-0.572426	-0.0485343	weak
chr1	192519865	192519865	1	+	rs1323298	T	C	SNV	c(-4, 3)	MSX2	jaspar2018	MA0708.1	MA0708.1	catgcaaTtacccag	0.992494	0.773932	9.16038	7.164	9.15527e-05	0.00720215	1	-1.99637	-0.216317	strong
chr1	192519865	192519865	1	+	rs1323298	T	C	SNV	c(-8, 2)	PHOX2A	jaspar2018	MA0713.1	MA0713.1	aatcatgcaaTtacccaggag	0.904344	0.709458	9.37818	7.39524	6.05583e-05	0.00647926	1	-1.98294	-0.191561	strong
chr1	192519865	192519865	1	+	rs1323298	T	C	SNV	c(-8, 2)	Phox2b	jaspar2018	MA0681.1	MA0681.1	aatcatgcaaTtacccaggag	0.899427	0.722685	10.2712	8.27801	6.19888e-05	0.00402379	1	-1.99314	-0.174755	strong
chr16	11174564	11174564	1	+	rs9652582	G	A	SNV	c(-2, 12)	HNF4A	jaspar2018	MA0114.2	MA0114.2	tctaaaggtcgcctGtgctttggcttatg	0.873315	0.744815	10.1628	8.69364	0.000101466	0.00203472	1	-1.46918	-0.126531	strong
chr17	40507980	40507980	1	+	rs9891119	A	C	SNV	c(-13, 4)	RARA	jaspar2018	MA0729.1	MA0729.1	gaaagtgatctaaagatCacttctgttccactttg	0.654193	0.729882	16.9272	18.8812	0.000720851	7.40506e-05	1	1.95402	0.0755769	strong
chr17	40507980	40507980	1	+	rs9891119	A	C	SNV	c(-14, 1)	Rarb	jaspar2018	MA0857.1	MA0857.1	aagtgatctaaagatCacttctgttccactt	0.653643	0.7297	16.4465	18.3521	0.000771911	8.4467e-05	1	1.90559	0.0758462	strong
chr17	40507980	40507980	1	+	rs9891119	A	C	SNV	c(-15, 1)	Rarb(var.2)	jaspar2018	MA0858.1	MA0858.1	aaagtgatctaaagatCacttctgttccacttt	0.721044	0.758839	16.7696	17.6439	0.000292622	6.63713e-05	1	0.874369	0.0376508	strong
chr17	40507980	40507980	1	+	rs9891119	A	C	SNV	c(-13, 2)	Rarg	jaspar2018	MA0859.1	MA0859.1	aagtgatctaaagatCacttctgttccactt	0.705377	0.785405	16.3632	18.2127	0.000327998	2.87578e-05	1	1.84954	0.079817	strong
chr17	40507980	40507980	1	+	rs9891119	A	C	SNV	c(-15, 2)	Tal1::Gata1	jaspar2018	MA0140.1	MA0140.1	gaaagtgatctaaagatAacttctgttccactttg	0.956093	0.794998	9.29371	7.76317	5.97352e-05	0.00317189	1	-1.53054	-0.157611	strong
chr2	61126664	61126664	1	-	rs10193964	A	G	SNV	c(-1, 6)	EHF	jaspar2018	MA0598.1	MA0598.1	gaggcagAggaagga	0.9993	0.845586	12.9479	10.9566	1.52588e-05	0.000518799	1	-1.99129	-0.153685	strong
chr2	61126664	61126664	1	+	rs10193964	A	G	SNV	c(-2, 8)	Erg	jaspar2018	MA0474.1	MA0474.1	ttggaggcagAggaaggaaat	0.958275	0.817602	11.3719	9.71592	4.86374e-05	0.00119448	1	-1.65602	-0.139594	strong
chr2	61126664	61126664	1	+	rs10193964	A	G	SNV	c(-2, 18)	ZNF263	jaspar2018	MA0528.1	MA0528.1	tttgtagttattggaggcagAggaaggaaatgtgaaagata	0.777255	0.731645	8.84166	8.34297	5.64466e-05	0.000312945	1	-0.498689	-0.0442213	weak
chr6	32634331	32634331	1	-	rs1049058	G	T	SNV	c(-8, 6)	Meis1	jaspar2018	MA0498.1	MA0498.1	gccagcatcaaggtGacagttgctacccg	0.956564	0.783133	11.1694	9.17442	8.47988e-05	0.00320366	1	-1.99498	-0.170964	strong
chr6	32634331	32634331	1	-	rs1049058	G	T	SNV	c(-1, 8)	Myb	jaspar2018	MA0100.2	MA0100.2	catcaaggtGacagttgct	0.996924	0.857763	12.0781	10.3953	4.76837e-06	0.0004282	1	-1.68278	-0.138897	strong
chr6	32634331	32634331	1	+	rs1049058	G	T	SNV	c(-1, 10)	PKNOX1	jaspar2018	MA0782.1	MA0782.1	agcatcaaggtGacagttgctac	0.801563	0.708539	16.6348	14.7065	0.000103593	0.00105983	1	-1.92827	-0.0929368	strong
chr6	32634331	32634331	1	+	rs1049058	G	T	SNV	c(-1, 10)	PKNOX2	jaspar2018	MA0783.1	MA0783.1	agcatcaaggtGacagttgctac	0.801149	0.706389	16.3792	14.4444	7.38502e-05	0.000875533	1	-1.9348	-0.0946608	strong
chr6	32634331	32634331	1	+	rs1049058	G	T	SNV	c(-1, 10)	TGIF1	jaspar2018	MA0796.1	MA0796.1	agcatcaaggtGacagttgctac	0.783854	0.693289	17.119	15.1425	9.50694e-05	0.00104678	1	-1.97652	-0.0905155	strong
chr6	32634331	32634331	1	+	rs1049058	G	T	SNV	c(-1, 10)	TGIF2	jaspar2018	MA0797.1	MA0797.1	agcatcaaggtGacagttgctac	0.810099	0.703304	13.8973	12.0818	6.62804e-05	0.00103623	1	-1.81546	-0.106009	strong
chr10	6114856	6114856	1	-	rs10905718	A	G	SNV	c(-8, 7)	SOX8	jaspar2018	MA0868.1	MA0868.1	agatgaagagactgaActctgttgagattag	0.710505	0.640442	19.8801	17.9262	0.000107067	0.000805567	1	-1.95395	-0.0698995	strong
chr10	6114856	6114856	1	-	rs10905718	A	G	SNV	c(-12, 3)	Vdr	jaspar2018	MA0693.1	MA0693.1	agatgaagagactgaActctgttgagattag	0.817086	0.748141	15.5463	14.2428	1.92467e-05	0.000177695	1	-1.30349	-0.0685884	strong
chr10	6114856	6114856	1	-	rs10905718	A	G	SNV	c(-3, 4)	VDR	jaspar2018	MA0693.2	MA0693.2	agactgaActctgtt	0.988637	0.791906	6.08424	4.9119	3.05176e-05	0.00466919	1	-1.17234	-0.190564	strong
chr5	96293816	96293816	1	+	rs1363974	A	G	SNV	c(-10, 4)	PRDM1	jaspar2018	MA0508.1	MA0508.1	ggcaaagtagagaaAggaaatggaacaat	0.856185	0.809058	11.3327	10.7226	6.09793e-05	0.000236044	1	-0.610057	-0.0462362	weak
chr5	96293816	96293816	1	+	rs1363974	A	G	SNV	c(-6, 8)	Spi1	jaspar2018	MA0080.3	MA0080.3	ggcaaagtagagaaAggaaatggaacaat	0.87507	0.838504	10.4903	10.06	8.19527e-05	0.000299978	1	-0.430283	-0.0359757	weak
chr8	129588843	129588843	1	+	rs115475689	C	A	SNV	c(-15, 5)	IRF3	jaspar2018	MA1418.1	MA1418.1	tccaatcagaatggaaatccAaaacccatctttcaactgca	0.711302	0.798343	15.3406	17.1892	0.000314	2.03184e-05	1	1.84864	0.0860948	strong
chr8	129588843	129588843	1	-	rs115475689	C	A	SNV	c(-9, 1)	NFKB1	jaspar2018	MA0105.3	MA0105.3	atggaaatccCaaacccatct	0.971681	0.817894	12.0283	10.1368	1.93119e-05	0.000818968	1	-1.89143	-0.152823	strong
chr8	129588843	129588843	1	-	rs115475689	C	A	SNV	c(-8, 1)	REL	jaspar2018	MA0101.1	MA0101.1	tggaaatccCaaacccatc	0.987957	0.860156	7.25911	6.3435	9.53674e-06	0.000320435	1	-0.915614	-0.124651	strong
chr8	129588843	129588843	1	-	rs115475689	C	A	SNV	c(-8, 1)	RELA	jaspar2018	MA0107.1	MA0107.1	tggaaatccCaaacccatc	0.962014	0.849535	10.6318	9.41017	1.71661e-05	0.000303268	1	-1.22167	-0.110614	strong
chr15	75061318	75061318	1	-	rs11631198	G	C	SNV	c(-4, 12)	PBX3	jaspar2018	MA1114.1	MA1114.1	atgtcaggatctgcccCcgtcactctccccagc	0.77093	0.839726	8.82044	9.57461	0.000474587	8.16573e-05	1	0.754167	0.0665544	strong
chr3	18785585	18785585	1	-	rs11719975	G	C	SNV	c(-11, 2)	ZIC1	jaspar2018	MA0696.1	MA0696.1	ctctcatctggagGcctgctagccttt	0.802102	0.699889	13.4003	11.7063	9.23499e-05	0.0013385	1	-1.69399	-0.101558	strong
chr6	41977937	41977937	1	+	rs11756584	G	A	SNV	c(-11, 9)	REST	jaspar2018	MA0138.2	MA0138.2	agtgacctaggtagtacctgGgagagccctccctctcttct	0.837921	0.755107	17.1258	15.476	2.49094e-06	5.52948e-05	1	-1.64973	-0.08105	strong
chr6	41977937	41977937	1	-	rs11756584	G	A	SNV	c(-10, 8)	REST	jaspar2018	MA0138.1	MA0138.1	tgacctaggtagtacctgGgagagccctccctctctt	0.831452	0.753365	14.471	13.1455	3.16388e-06	5.83802e-05	1	-1.32552	-0.0764777	strong
chr1	7963072	7963072	1	-	rs12121408	T	C	SNV	c(-9, 1)	E2F6	jaspar2018	MA0471.1	MA0471.1	tccttccctcCtcccctcctt	0.920212	0.955959	11.0062	11.4323	0.000216007	4.05312e-05	1	0.426061	0.0356322	weak
chr1	7963072	7963072	1	-	rs12121408	T	C	SNV	c(-5, 12)	EWSR1-FLI1	jaspar2018	MA0149.1	MA0149.1	ccctccctccttccctcCtcccctccttcccctcc	0.78425	0.846326	24.2313	26.1412	1.48456e-06	5.90953e-08	1	1.90988	0.0618702	strong
chr1	7963072	7963072	1	-	rs12121408	T	C	SNV	c(-7, 7)	Pparg::Rxra	jaspar2018	MA0065.2	MA0065.2	tccctccttccctcTtcccctccttcccc	0.87609	0.698481	7.78296	6.26717	3.78406e-05	0.00443356	1	-1.51579	-0.17146	strong
chr1	7963072	7963072	1	-	rs12121408	T	C	SNV	c(-4, 10)	Spi1	jaspar2018	MA0080.3	MA0080.3	tccctccttccctcTtcccctccttcccc	0.874231	0.786488	10.4804	9.44793	8.47885e-05	0.00117768	1	-1.0325	-0.0863265	strong
chr10	112147807	112147807	1	+	rs12267665	G	A	SNV	c(-15, 2)	EWSR1-FLI1	jaspar2018	MA0149.1	MA0149.1	gagaacagaaggtagaaAgtgggagagaggctggc	0.625217	0.678441	19.3384	20.9759	0.0004242	7.87593e-05	1	1.63752	0.053047	strong
chr10	112147807	112147807	1	-	rs12267665	G	A	SNV	c(-5, 4)	PRDM1	jaspar2018	MA0508.2	MA0508.2	aaggtagaaAgtgggagag	0.812961	0.967189	10.1171	12.0133	0.00151634	8.7738e-05	1	1.89624	0.152717	strong
chr10	112147807	112147807	1	+	rs12267665	G	A	SNV	c(-1, 6)	TBX15	jaspar2018	MA0803.1	MA0803.1	ggtagaaGgtgggag	0.894597	0.780011	11.333	9.89014	7.62939e-05	0.00119019	1	-1.44286	-0.113968	strong
chr19	10714433	10714433	1	-	rs12460655	G	T	SNV	c(-5, 14)	RREB1	jaspar2018	MA0073.1	MA0073.1	aattccagccccagtggctGtgggtgctgtgtgtccctt	0.856709	0.809252	11.189	10.591	3.74537e-06	2.99005e-05	1	-0.597928	-0.0460145	weak
chr17	38082807	38082807	1	+	rs12603332	T	C	SNV	c(-4, 3)	Atoh1	jaspar2018	MA0461.1	MA0461.1	tggcaggTggctgct	0.954588	0.871333	11.6522	10.636	6.10352e-05	0.000549316	1	-1.01621	-0.0832514	strong
chr17	38082807	38082807	1	-	rs12603332	T	C	SNV	c(-7, 4)	HES5	jaspar2018	MA0821.1	MA0821.1	tagctggcaggTggctgcttagt	0.843589	0.730217	14.7976	12.8129	9.10163e-05	0.00124067	1	-1.98473	-0.113182	strong
chr17	38082807	38082807	1	-	rs12603332	T	C	SNV	c(-7, 4)	HES7	jaspar2018	MA0822.1	MA0822.1	tagctggcaggTggctgcttagt	0.815422	0.713158	15.3881	13.4632	7.53999e-05	0.00102788	1	-1.92493	-0.102051	strong
chr17	38082807	38082807	1	-	rs12603332	T	C	SNV	c(-7, 3)	Tcf3	jaspar2018	MA0522.1	MA0522.1	agctggcaggTggctgcttag	0.94402	0.80722	11.0153	9.4275	0.000104666	0.00155735	1	-1.58779	-0.136115	strong
chr17	38082807	38082807	1	-	rs12603332	T	C	SNV	c(-7, 3)	ZEB1	jaspar2018	MA0103.3	MA0103.3	agctggcaggTggctgcttag	0.997656	0.817306	10.4187	8.55029	2.95639e-05	0.00337934	1	-1.86836	-0.178911	strong
chr10	6070276	6070276	1	-	rs12722558	A	T	SNV	c(-2, 13)	Vdr	jaspar2018	MA0693.1	MA0693.1	acctgaacagggcagAactcagtgaaactta	0.772534	0.694356	14.704	13.226	8.51266e-05	0.000770653	1	-1.47806	-0.0777741	strong
chr16	11187783	11187783	1	+	rs12924729	G	A	SNV	c(-1, 15)	RARA::RXRA	jaspar2018	MA0159.1	MA0159.1	acccaagccacggtgcGttcagggatggggcag	0.844778	0.688691	9.38826	7.71132	5.78511e-05	0.00375705	1	-1.67694	-0.151678	strong
chr16	11187783	11187783	1	+	rs12924729	G	A	SNV	c(-2, 15)	RARA::RXRG	jaspar2018	MA1149.1	MA1149.1	gacccaagccacggtgcGttcagggatggggcagg	0.856914	0.704827	9.10726	7.53526	8.06565e-05	0.00338855	1	-1.572	-0.148495	strong
chr16	11187783	11187783	1	-	rs12924729	G	A	SNV	c(-6, 9)	ZNF143	jaspar2018	MA0088.2	MA0088.2	cccaagccacggtgcAttcagggatggggca	0.749954	0.849963	14.6395	16.5842	0.000293484	1.30029e-05	1	1.94465	0.0997172	strong
chr22	21997070	21997070	1	+	rs13054355	G	A	SNV	c(-8, 2)	EBF1	jaspar2018	MA0154.2	MA0154.2	gggtcccctgGgacatgttct	0.975607	0.924636	11.0518	10.4766	2.14577e-06	5.43594e-05	1	-0.575224	-0.0507831	weak
chr22	21997070	21997070	1	+	rs13054355	G	A	SNV	c(-9, 4)	EBF1	jaspar2018	MA0154.3	MA0154.3	ttggggtcccctgGgacatgttctggt	0.950795	0.853956	13.8324	12.4403	8.37818e-06	0.000125233	1	-1.39206	-0.0957418	strong
chr2	231091223	231091223	1	+	rs13397985	T	G	SNV	c(-8, 6)	FOXA1	jaspar2018	MA0148.3	MA0148.3	gttctggtatttttTacatatctggtcag	0.915483	0.822331	10.5713	9.50371	8.24686e-05	0.000825393	1	-1.06759	-0.0925131	strong
chr2	231091223	231091223	1	+	rs13397985	T	G	SNV	c(-4, 7)	Foxa2	jaspar2018	MA0047.2	MA0047.2	ctggtatttttTacatatctggt	0.908937	0.846614	10.1205	9.43345	8.96454e-05	0.000467539	1	-0.687036	-0.0617596	weak
chr2	231091223	231091223	1	-	rs13397985	T	G	SNV	c(-5, 5)	FOXB1	jaspar2018	MA0845.1	MA0845.1	tggtatttttTacatatctgg	0.921824	0.880039	9.31561	8.90053	1.97887e-05	0.000101566	1	-0.415075	-0.0411285	weak
chr2	231091223	231091223	1	-	rs13397985	T	G	SNV	c(-5, 5)	FOXC1	jaspar2018	MA0032.2	MA0032.2	tggtatttttTacatatctgg	0.9395	0.891318	9.04795	8.5904	2.6226e-05	0.000187874	1	-0.457545	-0.0475496	weak
chr2	231091223	231091223	1	-	rs13397985	T	G	SNV	c(-6, 5)	FOXC2	jaspar2018	MA0846.1	MA0846.1	ctggtatttttTacatatctggt	0.914052	0.852788	8.56333	8.0013	6.84261e-05	0.000536025	1	-0.562032	-0.0600987	weak
chr2	231091223	231091223	1	-	rs13397985	T	G	SNV	c(-9, 7)	Foxk1	jaspar2018	MA0852.1	MA0852.1	ctgttctggtatttttTacatatctggtcagag	0.875943	0.775225	11.3993	10.1159	6.24818e-05	0.000827819	1	-1.28342	-0.0988761	strong
chr2	231091223	231091223	1	-	rs13397985	T	G	SNV	c(-10, 4)	MEF2C	jaspar2018	MA0497.1	MA0497.1	gttctggtatttttGacatatctggtcag	0.86993	0.908426	10.2725	10.7206	0.000166859	5.13373e-05	1	0.448103	0.0380182	weak
chr2	231091223	231091223	1	-	rs13397985	T	G	SNV	c(-4, 7)	POU2F1	jaspar2018	MA0785.1	MA0785.1	ctggtatttttTacatatctggt	0.89002	0.825198	9.13962	8.48819	8.76188e-05	0.00051409	1	-0.651422	-0.0635852	weak
chr2	231091223	231091223	1	-	rs13397985	T	G	SNV	c(-4, 6)	POU5F1	jaspar2018	MA1115.1	MA1115.1	tggtatttttTacatatctgg	0.922721	0.780094	8.43104	7.16432	7.1764e-05	0.00305796	1	-1.26671	-0.138934	strong
chr2	231091223	231091223	1	-	rs13397985	T	G	SNV	c(-7, 4)	ZNF384	jaspar2018	MA1125.1	MA1125.1	ctggtatttttTacatatctggt	0.968817	0.817457	12.0301	10.1753	8.4579e-05	0.00114197	1	-1.85479	-0.149433	strong
chr14	103272456	103272456	1	-	rs138927618	G	A	SNV	c(-10, 4)	Sox2	jaspar2018	MA0143.1	MA0143.1	ttggtaagtagaacAagggatgctgtgaa	0.70543	0.853416	7.18045	8.60555	0.00376975	5.85364e-05	1	1.4251	0.142266	strong
chr14	103272456	103272456	1	-	rs138927618	G	A	SNV	c(-10, 4)	Sox2	jaspar2018	MA0143.2	MA0143.2	ttggtaagtagaacAagggatgctgtgaa	0.705315	0.853417	7.24388	8.68419	0.00378032	5.93429e-05	1	1.44032	0.142468	strong
chr19	49152680	49152680	1	+	rs141256065	G	A	SNV	c(-3, 7)	Bhlhe40	jaspar2018	MA0464.1	MA0464.1	gtgtggtgacAcatgcctcta	0.767209	0.941003	8.87959	10.8786	0.00324464	8.01086e-05	1	1.99905	0.172969	strong
chr19	49152680	49152680	1	+	rs141256065	G	A	SNV	c(-9, 2)	CREB1	jaspar2018	MA0018.1	MA0018.1	ggtgtggtgacGcatgcctctag	0.969406	0.790274	8.68528	7.11426	5.59092e-05	0.00276405	1	-1.57102	-0.175463	strong
chr19	49152680	49152680	1	+	rs141256065	G	A	SNV	c(-4, 7)	HES5	jaspar2018	MA0821.1	MA0821.1	ggtgtggtgacAcatgcctctag	0.748933	0.862305	13.1405	15.1252	0.000832319	5.23925e-05	1	1.98473	0.113182	strong
chr19	49152680	49152680	1	+	rs141256065	G	A	SNV	c(-4, 7)	HES7	jaspar2018	MA0822.1	MA0822.1	ggtgtggtgacAcatgcctctag	0.715723	0.817986	13.5115	15.4364	0.000948846	6.65188e-05	1	1.92493	0.102051	strong
chr19	49152680	49152680	1	+	rs141256065	G	A	SNV	c(-6, 10)	PAX1	jaspar2018	MA0779.1	MA0779.1	agccgggtgtggtgacGcatgcctctagtccca	0.784183	0.666024	13.1952	11.2194	8.78695e-05	0.00214162	1	-1.97578	-0.117578	strong
chr10	75639504	75639504	1	+	rs145401745	G	A	SNV	c(-3, 10)	PLAG1	jaspar2018	MA0163.1	MA0163.1	gctgtcatcagagGcacaagggaggta	0.825022	0.731401	11.6738	10.3758	4.27999e-05	0.000629622	1	-1.29802	-0.0920596	strong
chr14	69282930	69282930	1	-	rs168961	A	G	SNV	c(-6, 5)	E2F1	jaspar2018	MA0024.3	MA0024.3	gggcgactggcGccatccaattc	0.757642	0.930956	8.65413	10.5985	0.00273311	4.10676e-05	1	1.94436	0.170962	strong
chr5	141508488	141508488	1	+	rs11739961	T	G	SNV	c(-4, 5)	NFATC3	jaspar2018	MA0625.1	MA0625.1	ttccaagttTccaggagac	0.984568	0.765282	7.60883	5.95246	0.00012207	0.00690174	1	-1.65637	-0.214406	strong
chr5	141508488	141508488	1	-	rs11739961	T	G	SNV	c(-3, 10)	Rfx1	jaspar2018	MA0509.1	MA0509.1	acatttccaagttGccaggagacaggc	0.803995	0.859892	10.3972	11.1062	0.000225756	3.93465e-05	1	0.708957	0.0550295	strong
chr5	141508488	141508488	1	-	rs11739961	T	G	SNV	c(-8, 10)	RFX2	jaspar2018	MA0600.1	MA0600.1	atttaacatttccaagttGccaggagacaggcagcct	0.758533	0.821433	10.3729	11.2143	0.000394371	6.05684e-05	1	0.841363	0.0618523	strong
chr5	141508488	141508488	1	-	rs11739961	T	G	SNV	c(-6, 8)	RFX5	jaspar2018	MA0510.1	MA0510.1	aacatttccaagttGccaggagacaggca	0.890876	0.951107	9.69633	10.3454	9.9523e-05	7.70204e-06	1	0.649026	0.0596959	weak
chr10	112215544	112215544	1	+	rs17127441	G	A	SNV	c(-12, 8)	REST	jaspar2018	MA0138.2	MA0138.2	gaatggagaccagaaccttgGtaagcaggaatcttgccaca	0.82247	0.732117	16.8179	15.018	4.71663e-06	0.000116315	1	-1.7999	-0.0884278	strong
chr10	112215544	112215544	1	-	rs17127441	G	A	SNV	c(-11, 7)	REST	jaspar2018	MA0138.1	MA0138.1	atggagaccagaaccttgGtaagcaggaatcttgcca	0.814995	0.764583	14.1917	13.3359	6.12701e-06	3.9896e-05	1	-0.855735	-0.0493728	strong
chr1	161187665	161187665	1	-	rs2070902	C	T	SNV	c(-10, 5)	SRF	jaspar2018	MA0083.3	MA0083.3	atttcttcccttagaTggctcccctccaggc	0.733629	0.806675	14.0905	15.4742	0.000459459	6.49882e-05	1	1.38365	0.0723057	strong
chr1	2487766	2487766	1	-	rs2227313	T	G	SNV	c(-8, 4)	TEAD2	jaspar2018	MA1121.1	MA1121.1	agtggactggaaTggtgcaggggga	0.908966	0.748677	9.05675	7.49853	0.000110045	0.00338589	1	-1.55822	-0.156736	strong
chr2	71127821	71127821	1	-	rs2234496	C	G	SNV	c(-8, 3)	ZBTB7A	jaspar2018	MA0750.1	MA0750.1	gcggcggtgggCgctgcggagac	0.937991	0.817209	10.4928	9.16455	2.34842e-05	0.000571966	1	-1.32824	-0.118861	strong
chr2	71175842	71175842	1	+	rs2266919	A	G	SNV	c(-1, 12)	GLIS3	jaspar2018	MA0737.1	MA0737.1	ggcctagtgctgaAgcccccactccgc	0.781165	0.695959	15.1188	13.4747	7.79778e-05	0.00079672	1	-1.64413	-0.0850057	strong
chr6	167403480	167403480	1	-	rs2345573	C	G	SNV	c(-6, 4)	SIX1	jaspar2018	MA1118.1	MA1118.1	cctgcctcagGttcccgagta	0.860869	0.966423	9.02171	10.0997	0.000217199	1.3113e-05	1	1.07797	0.103229	strong
chr6	167403480	167403480	1	-	rs2345573	C	G	SNV	c(-7, 8)	SIX2	jaspar2018	MA1119.1	MA1119.1	attctcctgcctcagGttcccgagtagctgc	0.829207	0.903441	9.24496	10.0383	0.00015513	1.41563e-05	1	0.793346	0.0716648	strong
chr6	167403480	167403480	1	+	rs2345573	C	G	SNV	c(-11, 3)	TFAP2C	jaspar2018	MA0524.1	MA0524.1	ttctcctgcctcagGttcccgagtagctg	0.737173	0.928187	7.8792	9.87838	0.00639922	9.47192e-05	1	1.99917	0.188069	strong
chr6	31322197	31322197	1	-	rs2428494	T	A	SNV	c(-7, 2)	MZF1(var.2)	jaspar2018	MA0057.1	MA0057.1	cctttccccTctgccccac	0.974983	0.763951	5.89052	4.65215	5.43594e-05	0.00722504	1	-1.23837	-0.205119	strong
chr6	31322197	31322197	1	-	rs2428494	T	A	SNV	c(-5, 9)	NR2C2	jaspar2018	MA0504.1	MA0504.1	ccaggcctttccccTctgccccacccacc	0.840461	0.757725	10.8136	9.7581	3.04012e-05	0.000401454	1	-1.05545	-0.0821444	strong
chr6	31322197	31322197	1	-	rs2428494	T	A	SNV	c(-5, 9)	Pparg::Rxra	jaspar2018	MA0065.2	MA0065.2	ccaggcctttccccTctgccccacccacc	0.931211	0.833373	8.25338	7.41839	3.5204e-06	0.000156711	1	-0.834994	-0.0944514	strong
chr5	96339967	96339967	1	-	rs144515364	C	T	SNV	c(-2, 9)	Mafb	jaspar2018	MA0117.2	MA0117.2	cgcctgtaatcTcagcactttgg	0.773414	0.959216	7.59063	9.37097	0.00322002	2.7597e-05	1	1.78035	0.182379	strong
chr5	96339967	96339967	1	+	rs144515364	C	T	SNV	c(-6, 11)	MAFF	jaspar2018	MA0495.1	MA0495.1	ggctcacgcctgtaatcTcagcactttgggaggcc	0.798532	0.947903	9.35094	11.0493	0.00132461	1.2779e-05	1	1.69841	0.14589	strong
chr5	96339967	96339967	1	+	rs144515364	C	T	SNV	c(-5, 9)	MAFK	jaspar2018	MA0496.1	MA0496.1	tcacgcctgtaatcTcagcactttgggag	0.806541	0.969059	9.79902	11.742	0.00154992	1.14217e-05	1	1.943	0.16042	strong
chr5	96339967	96339967	1	-	rs144515364	C	T	SNV	c(-1, 9)	NRL	jaspar2018	MA0842.1	MA0842.1	gcctgtaatcTcagcactttg	0.812588	0.971658	5.53751	6.5906	0.00360012	7.22408e-05	1	1.05309	0.155363	strong
chr12	6572549	6572549	1	+	rs2534712	C	T	SNV	c(-12, 1)	Zfx	jaspar2018	MA0146.2	MA0146.2	gatcggccgggccTcaggaagaaccac	0.796656	0.963174	9.21335	11.1036	0.00171654	5.45494e-05	1	1.89025	0.164061	strong
chr12	6572549	6572549	1	+	rs2534712	C	T	SNV	c(-12, 1)	Zfx	jaspar2018	MA0146.1	MA0146.1	gatcggccgggccTcaggaagaaccac	0.797629	0.963067	9.18271	11.052	0.00166127	5.35548e-05	1	1.86926	0.16298	strong
chr4	38512322	38512322	1	+	rs2609463	G	A	SNV	c(-3, 6)	ERF	jaspar2018	MA0760.1	MA0760.1	aaagggaacGgaaatctta	0.88926	0.713143	10.0142	8.04945	8.2016e-05	0.00435543	1	-1.96478	-0.174653	strong
chr4	38512322	38512322	1	+	rs2609463	G	A	SNV	c(-3, 6)	ERG	jaspar2018	MA0474.2	MA0474.2	aaagggaacGgaaatctta	0.920209	0.723991	9.43077	7.43659	9.82285e-05	0.00753403	1	-1.99418	-0.194712	strong
chr4	38512322	38512322	1	+	rs2609463	G	A	SNV	c(-4, 6)	ETV2	jaspar2018	MA0762.1	MA0762.1	caaagggaacGgaaatcttaa	0.900734	0.74956	11.9556	9.96147	5.19753e-05	0.00187159	1	-1.99414	-0.150331	strong
chr11	35051943	35051943	1	-	rs2732522	C	A	SNV	c(-2, 8)	Crx	jaspar2018	MA0467.1	MA0467.1	attattttttAatcctcataa	0.768783	0.937313	8.59938	10.463	0.00275278	3.00407e-05	1	1.8636	0.167047	strong
chr11	35051943	35051943	1	-	rs2732522	C	A	SNV	c(-6, 10)	Dmbx1	jaspar2018	MA0883.1	MA0883.1	tgtattattattttttAatcctcataaaaaacc	0.816351	0.976536	9.021	10.7517	0.00188667	2.73823e-05	1	1.73069	0.157261	strong
chr11	35051943	35051943	1	+	rs2732522	C	A	SNV	c(-3, 6)	GSC	jaspar2018	MA0648.1	MA0648.1	ttattttttAatcctcata	0.812434	0.990043	7.12746	8.65032	0.00424767	9.15527e-05	1	1.52286	0.174326	strong
chr21	34697264	34697264	1	-	rs2850015	T	C	SNV	c(-8, 5)	MTF1	jaspar2018	MA0863.1	MA0863.1	ggggcagcgcgtgTgcagaggggcggt	0.797385	0.717222	14.3379	12.915	4.56274e-05	0.000420842	1	-1.42287	-0.0793381	strong
chr21	34697264	34697264	1	+	rs2850015	T	C	SNV	c(-7, 3)	NRF1	jaspar2018	MA0506.1	MA0506.1	gcagcgcgtgCgcagaggggc	0.881701	0.996606	11.1979	12.6552	5.88894e-05	4.76837e-07	1	1.45733	0.114766	strong
chr12	6444963	6444963	1	+	rs34819705	G	C	SNV	c(-7, 7)	Bach1::Mafk	jaspar2018	MA0591.1	MA0591.1	gccagtcaccctgaCtcagccacggggag	0.865655	0.917448	13.9845	14.8114	2.50656e-05	3.70853e-06	1	0.826907	0.0512671	strong
chr12	6444963	6444963	1	+	rs34819705	G	C	SNV	c(-5, 8)	BACH2	jaspar2018	MA1101.1	MA1101.1	ccagtcaccctgaCtcagccacgggga	0.920949	0.963155	12.0922	12.6342	8.56072e-06	2.60025e-06	1	0.542032	0.041353	weak
chr12	6444963	6444963	1	+	rs34819705	G	C	SNV	c(-17, 2)	ESR1	jaspar2018	MA0112.2	MA0112.2	aggaggccagtcaccctgaCtcagccacggggagacgct	0.68312	0.813484	7.31502	8.61207	0.00225292	7.0383e-05	1	1.29705	0.123909	strong
chr12	6444963	6444963	1	+	rs34819705	G	C	SNV	c(-4, 10)	MAF::NFE2	jaspar2018	MA0501.1	MA0501.1	gccagtcaccctgaCtcagccacggggag	0.830808	0.875085	13.1393	13.8311	6.57877e-05	1.5704e-05	1	0.691763	0.0438304	weak
chr12	6444963	6444963	1	+	rs34819705	G	C	SNV	c(-8, 6)	Nfe2l2	jaspar2018	MA0150.2	MA0150.2	gccagtcaccctgaCtcagccacggggag	0.854418	0.888497	11.9973	12.4651	6.09392e-05	1.96192e-05	1	0.467748	0.0334214	weak
chr12	6444963	6444963	1	+	rs34819705	G	C	SNV	c(-4, 6)	NFE2L2	jaspar2018	MA0150.1	MA0150.1	gtcaccctgaCtcagccacgg	0.851975	0.930992	9.27998	10.1205	0.000322104	3.50475e-05	1	0.840567	0.0774385	strong
chr2	102679263	102679263	1	-	rs35650403	G	A	SNV	c(1, 10)	Esrra	jaspar2018	MA0592.2	MA0592.2	tgagatggtgAtgaccttaag	0.852757	0.890951	14.3364	14.9766	5.14984e-05	1.14441e-05	1	0.640211	0.0380975	weak
chr19	1095334	1095334	1	-	rs371018866	G	C	SNV	c(-5, 5)	Egr1	jaspar2018	MA0162.1	MA0162.1	cgccgccgccCccgctcgcac	0.85401	0.934232	8.58772	9.37553	0.000212669	1.71661e-05	1	0.787811	0.0786128	strong
chr19	1095334	1095334	1	+	rs371018866	G	C	SNV	c(-6, 7)	EGR1	jaspar2018	MA0162.3	MA0162.3	ctccgccgccgccCccgctcgcacccc	0.766159	0.865185	14.1143	15.9289	0.000300173	1.68569e-05	1	1.81457	0.0986223	strong
chr19	1095334	1095334	1	+	rs371018866	G	C	SNV	c(-8, 5)	EGR1	jaspar2018	MA0162.2	MA0162.2	ctccgccgccgccCccgctcgcacccc	0.914337	0.989054	10.7803	11.6527	2.79024e-05	9.68575e-08	1	0.872469	0.0740601	strong
chr19	1095334	1095334	1	+	rs371018866	G	C	SNV	c(-8, 6)	EGR2	jaspar2018	MA0472.1	MA0472.1	cctccgccgccgccCccgctcgcacccct	0.816901	0.908793	9.63527	10.704	0.000789085	6.26752e-05	1	1.06874	0.0908423	strong
chr19	1095334	1095334	1	+	rs371018866	G	C	SNV	c(-5, 5)	EGR2	jaspar2018	MA0472.2	MA0472.2	cgccgccgccCccgctcgcac	0.799754	0.871221	11.1327	12.1207	0.000267267	5.22137e-05	1	0.988024	0.0710755	strong
chr19	1095334	1095334	1	+	rs371018866	G	C	SNV	c(-7, 7)	EGR3	jaspar2018	MA0732.1	MA0732.1	cctccgccgccgccCccgctcgcacccct	0.813962	0.912467	13.5782	15.2048	0.000156259	7.77841e-06	1	1.62663	0.0976936	strong
chr19	1095334	1095334	1	+	rs371018866	G	C	SNV	c(-7, 8)	EGR4	jaspar2018	MA0733.1	MA0733.1	gcctccgccgccgccCccgctcgcacccctt	0.776257	0.906071	9.14916	10.6232	0.000589164	1.45722e-05	1	1.47404	0.126097	strong
chr19	1095334	1095334	1	+	rs371018866	G	C	SNV	c(-8, 2)	SP1	jaspar2018	MA0079.3	MA0079.3	cgccgccgccCccgctcgcac	0.838535	0.91834	9.79305	10.7197	0.000825405	8.29697e-05	1	0.926693	0.0794218	strong
chr19	1095334	1095334	1	-	rs371018866	G	C	SNV	c(-1, 19)	ZNF263	jaspar2018	MA0528.1	MA0528.1	tggcagcctccgccgccgccCccgctcgcaccccttctccg	0.74386	0.781544	8.47653	8.88856	0.000203538	4.72906e-05	1	0.412032	0.036537	weak
chr12	68425912	68425912	1	+	rs146147451	T	C	SNV	c(-9, 2)	FOXI1	jaspar2018	MA0042.1	MA0042.1	agagctatttaTttacagagcac	0.973168	0.888738	9.69267	8.86607	2.03252e-05	0.000480771	1	-0.8266	-0.0830306	strong
chr12	68425912	68425912	1	-	rs146147451	T	C	SNV	c(-7, 9)	Foxj3	jaspar2018	MA0851.1	MA0851.1	ttgcaagagctatttaTttacagagcactgtct	0.909567	0.843572	10.2054	9.48065	9.2337e-05	0.00041214	1	-0.724712	-0.0647155	strong
chr5	35869359	35869359	1	-	rs3777090	A	T	SNV	c(-3, 9)	ELF1	jaspar2018	MA0473.1	MA0473.1	gaagagggaagcTtcctgccttccc	0.834868	0.927979	10.176	11.2951	0.00074178	5.41806e-05	1	1.11915	0.0920292	strong
chr5	35869359	35869359	1	-	rs3777090	A	T	SNV	c(-4, 6)	Erg	jaspar2018	MA0474.1	MA0474.1	agagggaagcTtcctgccttc	0.802509	0.963292	9.53825	11.431	0.00160193	3.48091e-05	1	1.89275	0.159549	strong
chr5	35869359	35869359	1	+	rs3777090	A	T	SNV	c(-5, 9)	Ets1	jaspar2018	MA0098.2	MA0098.2	ctgaagagggaagcTtcctgccttcccac	0.853652	0.928024	10.0167	10.8743	0.000350462	3.55663e-05	1	0.857575	0.0732705	strong
chr5	35869359	35869359	1	-	rs3777090	A	T	SNV	c(-2, 15)	EWSR1-FLI1	jaspar2018	MA0149.1	MA0149.1	aggctgaagagggaagcTtcctgccttcccacttc	0.677842	0.731598	20.9575	22.6114	8.15425e-05	1.18993e-05	1	1.6539	0.0535775	strong
chr5	35869359	35869359	1	-	rs3777090	A	T	SNV	c(-4, 6)	FLI1	jaspar2018	MA0475.1	MA0475.1	agagggaagcTtcctgccttc	0.814851	0.946896	9.36292	10.863	0.00118446	3.29018e-05	1	1.5001	0.130826	strong
chr14	35514957	35514957	1	+	rs3809449	G	A	SNV	c(-9, 4)	MTF1	jaspar2018	MA0863.1	MA0863.1	aacatacgcacacGactttaagacaca	0.777424	0.685889	13.9836	12.3589	8.45678e-05	0.00095506	1	-1.62471	-0.0905925	strong
chr6	159421040	159421040	1	-	rs45484795	C	G	SNV	c(-6, 4)	ESRRA	jaspar2018	MA0592.1	MA0592.1	ggtggctgtcCttggcccggc	0.907837	0.770017	11.6259	9.87361	4.69685e-05	0.00139761	1	-1.75233	-0.136925	strong
chr6	159421040	159421040	1	-	rs45484795	C	G	SNV	c(-4, 7)	Esrrb	jaspar2018	MA0141.2	MA0141.2	cggtggctgtcCttggcccggct	0.906901	0.752189	10.759	8.9419	7.13468e-05	0.00204307	1	-1.81705	-0.153307	strong
chr6	159421040	159421040	1	-	rs45484795	C	G	SNV	c(-4, 7)	Esrrb	jaspar2018	MA0141.1	MA0141.1	cggtggctgtcCttggcccggct	0.906789	0.751043	10.6114	8.80808	7.13468e-05	0.00212377	1	-1.80334	-0.154254	strong
chr6	159421040	159421040	1	-	rs45484795	C	G	SNV	c(-6, 8)	Nr5a2	jaspar2018	MA0505.1	MA0505.1	caacggtggctgtcCttggcccggctttg	0.92627	0.788464	12.2678	10.4733	2.40402e-05	0.000850687	1	-1.79446	-0.135658	strong
chr6	159421040	159421040	1	-	rs45484795	C	G	SNV	c(-9, 11)	REST	jaspar2018	MA0138.2	MA0138.2	gcggggcaacggtggctgtcCttggcccggctttggaatgt	0.785918	0.701351	16.0898	14.4051	1.90615e-05	0.000292889	1	-1.68465	-0.0827653	strong
chr6	159421040	159421040	1	+	rs45484795	C	G	SNV	c(-8, 10)	REST	jaspar2018	MA0138.1	MA0138.1	ggggcaacggtggctgtcCttggcccggctttggaat	0.775205	0.693214	13.5162	12.1244	2.74564e-05	0.000378531	1	-1.3918	-0.0803016	strong
chr17	73368242	73368242	1	+	rs4789178	C	G	SNV	c(-9, -1)	Klf4	jaspar2018	MA0039.1	MA0039.1	aagagaaagGactagactc	0.664936	0.947591	3.16181	4.42224	0.0449419	4.00543e-05	1	1.26043	0.270714	strong
chr6	167403485	167403485	1	-	rs4997107	C	T	SNV	c(-7, 5)	ELF1	jaspar2018	MA0473.1	MA0473.1	gcctcagcttccTgagtagctgcaa	0.863065	0.922141	10.5149	11.225	0.000446022	7.29114e-05	1	0.710066	0.0583899	strong
chr6	167403485	167403485	1	-	rs4997107	C	T	SNV	c(-8, 2)	Erg	jaspar2018	MA0474.1	MA0474.1	ctcagcttccTgagtagctgc	0.81513	0.955803	9.68683	11.3428	0.00124407	5.60284e-05	1	1.65602	0.139594	strong
chr6	167403485	167403485	1	+	rs4997107	C	T	SNV	c(-9, 5)	Ets1	jaspar2018	MA0098.2	MA0098.2	ctgcctcagcttccTgagtagctgcaatt	0.804641	0.93027	9.45156	10.9002	0.00103402	3.22228e-05	1	1.44862	0.123769	strong
chr6	167403485	167403485	1	-	rs4997107	C	T	SNV	c(-8, 2)	FLI1	jaspar2018	MA0475.1	MA0475.1	ctcagcttccTgagtagctgc	0.867324	0.943508	9.95904	10.8245	0.000424147	3.6478e-05	1	0.865492	0.0754813	strong
chr19	1030979	1030979	1	+	rs530858703	G	A	SNV	c(-9, 9)	Nr1h3::Rxra	jaspar2018	MA0494.1	MA0494.1	atctgctgttgccctggaGtccccggccccaccctct	0.882814	0.842265	9.28654	8.86824	1.25757e-05	5.86185e-05	1	-0.418301	-0.0398557	weak
chr19	1030979	1030979	1	-	rs530858703	G	A	SNV	c(-3, 6)	REL	jaspar2018	MA0101.1	MA0101.1	tgccctggaAtccccggcc	0.793596	0.97079	5.86663	7.13612	0.00319862	4.3869e-05	1	1.26949	0.172828	strong
chr19	1030979	1030979	1	+	rs530858703	G	A	SNV	c(-12, 3)	RFX5	jaspar2018	MA0510.2	MA0510.2	tgctgttgccctggaAtccccggccccaccc	0.73839	0.815138	13.5483	14.9421	0.000250147	2.37157e-05	1	1.39375	0.0761645	strong
chr13	100020518	100020518	1	-	rs148666432	G	A	SNV	c(-13, 1)	IRF4	jaspar2018	MA1419.1	MA1419.1	atggtttcacttttGtatggttttgagtc	0.764175	0.715169	16.8036	15.7305	9.35551e-05	0.000375629	1	-1.07313	-0.0488502	strong
chr13	100020518	100020518	1	-	rs148666432	G	A	SNV	c(-12, 1)	IRF7	jaspar2018	MA0772.1	MA0772.1	tggtttcacttttGtatggttttgagt	0.90527	0.85039	14.4738	13.6063	1.04681e-05	5.73359e-05	1	-0.867557	-0.0543196	strong
chr13	100020518	100020518	1	-	rs148666432	G	A	SNV	c(-12, 1)	IRF8	jaspar2018	MA0652.1	MA0652.1	tggtttcacttttGtatggttttgagt	0.780389	0.734406	16.6604	15.68	6.52038e-05	0.000244997	1	-0.980381	-0.0459353	strong
chr13	100020518	100020518	1	-	rs148666432	G	A	SNV	c(-12, 2)	IRF9	jaspar2018	MA0653.1	MA0653.1	atggtttcacttttGtatggttttgagtc	0.754977	0.692196	17.8383	16.3604	7.3608e-05	0.000445704	1	-1.47795	-0.0626078	strong
chr10	75639554	75639554	1	-	rs549429262	G	A	SNV	c(-5, 5)	EGR2	jaspar2018	MA0472.2	MA0472.2	gcgtcagcgtGgacgacctgg	0.848203	0.78868	11.8025	10.9796	9.29832e-05	0.000381708	1	-0.822893	-0.0591965	strong
chr10	75639554	75639554	1	-	rs549429262	G	A	SNV	c(-16, 3)	TP63	jaspar2018	MA0525.1	MA0525.1	gggcggcatgcgtcagcgtGgacgacctgggcaggaaga	0.904013	0.761535	9.94878	8.42787	5.28731e-05	0.00355354	1	-1.52091	-0.1386	strong
chr12	68434875	68434875	1	+	rs558237770	C	G	SNV	c(-7, 3)	DMRT3	jaspar2018	MA0610.1	MA0610.1	agacatgtatCacttctgcca	0.986949	0.788907	10.0782	8.0902	1.33514e-05	0.00406647	1	-1.98798	-0.194724	strong
chr12	68434875	68434875	1	-	rs558237770	C	G	SNV	c(-2, 6)	Nr2e1	jaspar2018	MA0676.1	MA0676.1	acatgtatGacttctgc	0.82923	0.952407	8.52449	9.77359	0.000907898	7.24792e-05	1	1.2491	0.121789	strong
chr12	68434875	68434875	1	-	rs558237770	C	G	SNV	c(-1, 10)	TGIF1	jaspar2018	MA0796.1	MA0796.1	aagacatgtatGacttctgccat	0.728368	0.783934	15.9081	17.1208	0.00040549	9.39965e-05	1	1.21266	0.0555343	strong
chr21	36421331	36421331	1	+	rs56045941	T	C	SNV	c(-5, 8)	ZIC1	jaspar2018	MA0696.1	MA0696.1	ctttcttctccccCctgctggatacct	0.718026	0.8383	12.0069	14.0002	0.000874493	2.92249e-05	1	1.9933	0.119502	strong
chr21	36421331	36421331	1	+	rs56045941	T	C	SNV	c(-5, 9)	ZIC3	jaspar2018	MA0697.1	MA0697.1	tctttcttctccccCctgctggatacctc	0.708894	0.842441	10.5706	12.5303	0.00152536	4.20026e-05	1	1.95974	0.132036	strong
chr21	36421331	36421331	1	+	rs56045941	T	C	SNV	c(-5, 9)	ZIC4	jaspar2018	MA0751.1	MA0751.1	tctttcttctccccCctgctggatacctc	0.743512	0.877232	8.33002	9.78839	0.00188439	4.76297e-05	1	1.45838	0.131063	strong
chr4	38607712	38607712	1	-	rs61131231	T	C	SNV	c(-6, 11)	PPARA::RXRA	jaspar2018	MA1148.1	MA1148.1	ctgtccccagcagaaccTcttcccccactccaccc	0.824213	0.744205	7.75792	7.04119	7.81469e-05	0.000760649	1	-0.71673	-0.076798	strong
chr6	159514778	159514778	1	-	rs654690	T	C	SNV	c(-5, 9)	EGR2	jaspar2018	MA0472.1	MA0472.1	tctctttttgtgagTgggtggggcctcaa	0.977632	0.876548	11.5046	10.329	3.00165e-06	0.000154156	1	-1.17564	-0.099929	strong
chr6	159514778	159514778	1	-	rs654690	T	C	SNV	c(-7, 8)	EGR4	jaspar2018	MA0733.1	MA0733.1	ttctctttttgtgagTgggtggggcctcaac	0.857149	0.813132	10.0677	9.56787	7.07495e-05	0.000236862	1	-0.499812	-0.0427564	weak
chr6	159514778	159514778	1	-	rs654690	T	C	SNV	c(-10, 9)	RREB1	jaspar2018	MA0073.1	MA0073.1	ggtcttctctttttgtgagTgggtggggcctcaaccctt	0.784794	0.671031	10.2829	8.84954	7.49087e-05	0.00219733	1	-1.43335	-0.110305	strong
chr11	60880856	60880856	1	+	rs678060	A	G	SNV	c(-9, 5)	EGR2	jaspar2018	MA0472.1	MA0472.1	gcaactttgcccccActccacagtgagac	0.920012	0.818928	10.8345	9.65885	5.91045e-05	0.000764591	1	-1.17564	-0.099929	strong
chr6	414679	414679	1	-	rs6938904	T	C	SNV	c(-11, 2)	SPI1	jaspar2018	MA0080.4	MA0080.4	cccacttcctcctTctgctcctgccat	0.853943	0.76004	17.4149	15.5084	8.67993e-06	0.000149131	1	-1.90653	-0.0935473	strong
chr6	414679	414679	1	-	rs6938904	T	C	SNV	c(-11, 2)	SPIC	jaspar2018	MA0687.1	MA0687.1	cccacttcctcctTctgctcctgccat	0.887157	0.82877	9.53322	8.9204	3.10317e-05	0.000202838	1	-0.612821	-0.0571789	weak
chr6	414679	414679	1	-	rs6938904	T	C	SNV	c(-19, 1)	ZNF263	jaspar2018	MA0528.1	MA0528.1	cacctcccccacttcctcctCctgctcctgccatataagat	0.915289	0.955776	10.3509	10.7936	2.3492e-08	5.30463e-10	1	0.442685	0.0392551	weak
chr10	82225375	82225375	1	-	rs72819576	C	G	SNV	c(-12, 2)	Meis1	jaspar2018	MA0498.1	MA0498.1	gaaagatagtgacaGctacagtgggaaca	0.858124	0.98127	10.037	11.4536	0.000270416	4.55789e-06	1	1.41655	0.121394	strong
chr10	82225375	82225375	1	+	rs72819576	C	G	SNV	c(-6, 1)	MEIS2	jaspar2018	MA0774.1	MA0774.1	agtgacaGctacagt	0.895891	0.984182	9.12513	10.0129	0.000442505	9.15527e-05	1	0.887722	0.0872721	strong
chr10	82225375	82225375	1	-	rs72819576	C	G	SNV	c(-6, 4)	T	jaspar2018	MA0009.1	MA0009.1	gatagtgacaCctacagtggg	0.915343	0.798	14.1495	12.3551	8.82149e-06	0.000267744	1	-1.7944	-0.116187	strong
chr10	82225375	82225375	1	-	rs72819576	C	G	SNV	c(-5, 2)	TBX1	jaspar2018	MA0805.1	MA0805.1	agtgacaCctacagt	0.916089	0.749988	11.1107	9.11173	7.62939e-05	0.00274658	1	-1.99899	-0.164926	strong
chr10	82225375	82225375	1	-	rs72819576	C	G	SNV	c(-5, 2)	TBX15	jaspar2018	MA0803.1	MA0803.1	agtgacaCctacagt	0.910445	0.754324	11.5326	9.56669	3.05176e-05	0.00234985	1	-1.96586	-0.155279	strong
chr10	82225375	82225375	1	-	rs72819576	C	G	SNV	c(-7, 3)	TBX2	jaspar2018	MA0688.1	MA0688.1	gatagtgacaCctacagtggg	0.959109	0.769757	8.48295	6.8441	4.43459e-05	0.00440311	1	-1.63885	-0.185456	strong
chr10	82225375	82225375	1	-	rs72819576	C	G	SNV	c(-7, 3)	TBX20	jaspar2018	MA0689.1	MA0689.1	gatagtgacaCctacagtggg	0.876734	0.750728	10.8287	9.29517	9.77516e-05	0.00167274	1	-1.53349	-0.124383	strong
chr10	82225375	82225375	1	-	rs72819576	C	G	SNV	c(-5, 2)	TBX4	jaspar2018	MA0806.1	MA0806.1	agtgacaCctacagt	0.980972	0.768481	8.59339	6.75838	3.05176e-05	0.00465393	1	-1.835	-0.20953	strong
chr10	82225375	82225375	1	-	rs72819576	C	G	SNV	c(-5, 2)	TBX5	jaspar2018	MA0807.1	MA0807.1	agtgacaCctacagt	0.981197	0.717426	7.08753	5.23352	3.05176e-05	0.0162048	1	-1.85401	-0.256799	strong
chr1	2524205	2524205	1	-	rs745368	C	T	SNV	c(-7, 5)	ELF1	jaspar2018	MA0473.1	MA0473.1	gccctgacttccTtctccctcaggg	0.86314	0.922217	10.5158	11.2259	0.000444978	7.2673e-05	1	0.710066	0.0583899	strong
chr1	2524205	2524205	1	-	rs745368	C	T	SNV	c(-14, 3)	EWSR1-FLI1	jaspar2018	MA0149.1	MA0149.1	ccccggccctgacttccTtctccctcagggccagg	0.627186	0.685919	19.399	21.206	0.000385728	5.20541e-05	1	1.80704	0.0585385	strong
chr1	2524205	2524205	1	-	rs745368	C	T	SNV	c(-8, 6)	Spi1	jaspar2018	MA0080.3	MA0080.3	cggccctgacttccTtctccctcagggcc	0.856349	0.892915	10.27	10.7003	0.000165698	3.83249e-05	1	0.430283	0.0359757	weak
chr1	2524205	2524205	1	-	rs745368	C	T	SNV	c(-6, -1)	SPI1	jaspar2018	MA0080.2	MA0080.2	acttccTtctccc	0.920972	1	7.31129	7.92911	0.000305176	0	1	0.617821	0.0779181	weak
chr1	2524205	2524205	1	-	rs745368	C	T	SNV	c(-15, 5)	ZNF263	jaspar2018	MA0528.1	MA0528.1	cagccccggccctgacttccTtctccctcagggccagggct	0.729029	0.779404	8.31437	8.86515	0.000342289	5.16768e-05	1	0.550786	0.048841	weak
chr3	17081116	17081116	1	+	rs7617672	C	T	SNV	c(-10, 3)	BACH2	jaspar2018	MA1101.1	MA1101.1	caacatgaatcatCtctgctgaggtct	0.84366	0.756785	11.0996	9.98388	0.000102095	0.000810824	1	-1.11572	-0.0851214	strong
chr5	96289711	96289711	1	+	rs7736466	G	C	SNV	c(-6, 5)	YY1	jaspar2018	MA0095.2	MA0095.2	ataaataaaatGgttgctagtgt	0.921524	0.769294	12.1516	10.1729	7.06315e-05	0.00193626	1	-1.97868	-0.150223	strong
chr6	41990449	41990449	1	+	rs77898797	T	C	SNV	c(-7, 8)	T	jaspar2018	MA0009.2	MA0009.2	gccttcctttacacaTgcgtgggtctggctc	0.79959	0.75259	13.4792	12.6988	8.23962e-05	0.000315296	1	-0.780411	-0.0464338	strong
chr12	123708063	123708063	1	+	rs1626899	A	G	SNV	c(-9, 2)	Mafb	jaspar2018	MA0117.2	MA0117.2	gtcctttgctgActacgcacctg	0.946666	0.760864	9.25072	7.47038	5.40018e-05	0.0041756	1	-1.78035	-0.182379	strong
chr12	123708063	123708063	1	-	rs1626899	A	G	SNV	c(-11, 6)	MAFF	jaspar2018	MA0495.1	MA0495.1	ccctctgtcctttgctgActacgcacctgcctcac	0.934895	0.785524	10.9014	9.20303	3.87997e-05	0.00188403	1	-1.69841	-0.14589	strong
chr12	123708063	123708063	1	-	rs1626899	A	G	SNV	c(-9, 11)	MAFF	jaspar2018	MA0495.2	MA0495.2	cagccctctgtcctttgctgActacgcacctgcctcacggg	0.812647	0.706776	10.7876	9.46399	1.83944e-05	0.000464104	1	-1.32357	-0.100807	strong
chr12	123708063	123708063	1	+	rs1626899	A	G	SNV	c(-9, 11)	MAFG	jaspar2018	MA0659.1	MA0659.1	cagccctctgtcctttgctgActacgcacctgcctcacggg	0.864693	0.784271	11.5215	10.485	7.09342e-06	0.000121306	1	-1.03653	-0.0781378	strong
chr12	123708063	123708063	1	-	rs1626899	A	G	SNV	c(-8, 10)	MAFK	jaspar2018	MA0496.2	MA0496.2	gccctctgtcctttgctgActacgcacctgcctcacg	0.833723	0.732186	11.5045	10.1628	1.07481e-05	0.00026682	1	-1.34171	-0.0979235	strong
chr12	123708063	123708063	1	-	rs1626899	A	G	SNV	c(-9, 5)	MAFK	jaspar2018	MA0496.1	MA0496.1	tctgtcctttgctgActacgcacctgcct	0.950665	0.788148	11.5221	9.57912	6.38813e-05	0.00260469	1	-1.943	-0.16042	strong
chr12	123708063	123708063	1	+	rs1626899	A	G	SNV	c(-7, 7)	Nfe2l2	jaspar2018	MA0150.2	MA0150.2	tctgtcctttgctgActacgcacctgcct	0.84353	0.698985	11.8479	9.86397	8.67248e-05	0.00271524	1	-1.98391	-0.141754	strong
chr12	123708063	123708063	1	+	rs1626899	A	G	SNV	c(-3, 7)	NFE2L2	jaspar2018	MA0150.1	MA0150.1	tcctttgctgActacgcacct	0.899349	0.745261	9.78394	8.14479	0.000101328	0.00279975	1	-1.63915	-0.151009	strong
chr12	123708063	123708063	1	+	rs1626899	A	G	SNV	c(-9, 1)	NRL	jaspar2018	MA0842.1	MA0842.1	tcctttgctgActacgcacct	0.985925	0.826855	6.68505	5.63196	3.8147e-05	0.0026083	1	-1.05309	-0.155363	strong
chr5	96298494	96298494	1	-	rs79128738	G	A	SNV	c(1, 16)	Hmx2	jaspar2018	MA0897.1	MA0897.1	attactctgctgtgccAtctctttattgcttag	0.821543	0.866526	9.76922	10.2863	0.0002477	7.25289e-05	1	0.51703	0.0437405	weak
chr15	75080491	75080491	1	-	rs8028495	A	G	SNV	c(-4, 13)	RARA	jaspar2018	MA0729.1	MA0729.1	ggagaggtccttgtttgGagcttctgccctctcta	0.669134	0.744608	17.3129	19.2614	0.000476705	4.51073e-05	1	1.94848	0.0753625	strong
chr15	75080491	75080491	1	-	rs8028495	A	G	SNV	c(-12, 5)	SRF	jaspar2018	MA0083.2	MA0083.2	ggagaggtccttgtttgGagcttctgccctctcta	0.795456	0.910152	10.3691	11.8348	0.000487342	1.83411e-05	1	1.46575	0.112898	strong
chr22	37627845	37627845	1	-	rs8135343	G	A	SNV	c(-5, 3)	Hic1	jaspar2018	MA0739.1	MA0739.1	cctggttgGcactgggg	0.991562	0.764646	8.21147	6.36823	1.52588e-05	0.00746918	1	-1.84324	-0.222613	strong
chr19	1174602	1174602	1	-	rs873074	C	T	SNV	c(-11, 2)	PLAG1	jaspar2018	MA0163.1	MA0163.1	tcccccactggggCtcactcacccgag	0.808047	0.692053	11.4384	9.83022	7.41147e-05	0.00161483	1	-1.60822	-0.11406	strong
chr6	32632885	32632885	1	+	rs9274412	G	C	SNV	c(-2, 8)	KLF16	jaspar2018	MA0741.1	MA0741.1	ccccagcccgCccgcccccgc	0.860751	0.918398	9.83391	10.4845	0.000235558	4.14848e-05	1	0.650551	0.0570391	weak
chr6	32632885	32632885	1	+	rs9274412	G	C	SNV	c(-10, 9)	RREB1	jaspar2018	MA0073.1	MA0073.1	tcagtcaggccccagcccgCccgcccccgcagccgccgc	0.73977	0.776703	9.71561	10.1809	0.000332138	9.96879e-05	1	0.465331	0.0358103	weak
chr6	32632885	32632885	1	+	rs9274412	G	C	SNV	c(-2, 8)	SP1	jaspar2018	MA0079.3	MA0079.3	ccccagcccgCccgcccccgc	0.869076	0.945178	10.1477	11.0314	0.000379801	2.00272e-05	1	0.883707	0.0757377	strong
chr6	32632885	32632885	1	+	rs9274412	G	C	SNV	c(-2, 12)	SP2	jaspar2018	MA0516.1	MA0516.1	caggccccagcccgCccgcccccgcagcc	0.874365	0.960455	10.1508	11.1345	0.000227817	4.89224e-06	1	0.983724	0.0849036	strong
chr3	141251655	141251655	1	+	rs9289634	A	G	SNV	c(-4, 5)	MAX	jaspar2018	MA0058.2	MA0058.2	gcaagtggcAcatggaaac	0.975188	0.854764	11.6708	10.2381	3.43323e-05	0.000900269	1	-1.43264	-0.119726	strong
chr3	141251655	141251655	1	-	rs9289634	A	G	SNV	c(-4, 5)	Myc	jaspar2018	MA0147.2	MA0147.2	gcaagtggcAcatggaaac	0.973496	0.886168	11.3854	10.3678	5.05447e-05	0.000799179	1	-1.01759	-0.0870162	strong
chr13	44454216	44454216	1	-	rs9562518	A	G	SNV	c(-3, 6)	ID4	jaspar2018	MA0824.1	MA0824.1	tgcccgggcAggtgcagag	0.993441	0.837851	10.55	8.90683	4.1008e-05	0.00160217	1	-1.64321	-0.154738	strong
chr13	44454216	44454216	1	-	rs9562518	A	G	SNV	c(-5, 8)	MTF1	jaspar2018	MA0863.1	MA0863.1	gaggtgcccgggcGggtgcagagccac	0.692405	0.798128	12.4745	14.3511	0.000832535	4.4059e-05	1	1.87654	0.104635	strong
chr13	44454216	44454216	1	-	rs9562518	A	G	SNV	c(-3, 6)	TCF3	jaspar2018	MA0522.2	MA0522.2	tgcccgggcAggtgcagag	0.996172	0.820407	10.6361	8.76605	4.48227e-05	0.0018301	1	-1.87005	-0.175151	strong
chr13	44454216	44454216	1	-	rs9562518	A	G	SNV	c(-3, 6)	TCF4	jaspar2018	MA0830.1	MA0830.1	tgcccgggcAggtgcagag	0.998087	0.823591	11.113	9.17553	1.43051e-05	0.00138664	1	-1.93747	-0.17401	strong
chr13	44454216	44454216	1	-	rs9562518	A	G	SNV	c(-12, 7)	TP53	jaspar2018	MA0106.1	MA0106.1	ccggtggaggtgcccgggcAggtgcagagccacagcctg	0.780145	0.702681	14.6463	13.2357	8.72805e-06	0.000153127	1	-1.41059	-0.0756357	strong
chr13	44454216	44454216	1	-	rs9562518	A	G	SNV	c(-4, 6)	ZEB1	jaspar2018	MA0103.3	MA0103.3	gtgcccgggcAggtgcagagc	0.997909	0.844767	10.4213	8.83478	2.12193e-05	0.000451803	1	-1.58649	-0.15192	strong
chr13	44454216	44454216	1	-	rs9562518	A	G	SNV	c(-1, 7)	ZEB1	jaspar2018	MA0103.2	MA0103.2	gcccgggcAggtgcaga	0.919142	0.760723	11.6224	9.62613	9.15527e-05	0.00234985	1	-1.99622	-0.157914	strong
chr1	160402259	160402259	1	-	rs17371986	A	G	SNV	c(-12, 2)	Sox1	jaspar2018	MA0870.1	MA0870.1	ttaacagtgtcactGtggagcttggaaat	0.733601	0.836344	14.3886	16.3838	0.000387478	1.86339e-05	1	1.99516	0.101993	strong
chr1	160402259	160402259	1	+	rs17371986	A	G	SNV	c(-12, 2)	Sox11	jaspar2018	MA0869.1	MA0869.1	ttaacagtgtcactGtggagcttggaaat	0.685321	0.760717	18.0867	20.0721	0.000420529	4.6961e-05	1	1.98543	0.0752819	strong
chr1	160402259	160402259	1	+	rs17371986	A	G	SNV	c(-12, 2)	SOX21	jaspar2018	MA0866.1	MA0866.1	ttaacagtgtcactGtggagcttggaaat	0.720689	0.812368	15.6376	17.6157	0.000393308	2.66731e-05	1	1.97815	0.0913094	strong
chr1	160402259	160402259	1	+	rs17371986	A	G	SNV	c(-13, 2)	SOX4	jaspar2018	MA0867.1	MA0867.1	cttaacagtgtcactGtggagcttggaaatc	0.652534	0.724537	17.8088	19.7659	0.000458005	5.27056e-05	1	1.95711	0.0718117	strong
chr3	101263573	101263573	1	-	rs1019677	C	T	SNV	c(-4, 6)	RUNX1	jaspar2018	MA0002.1	MA0002.1	agcattaaacCacagtaagtc	0.981525	0.781658	8.55209	6.8449	6.91414e-06	0.00390744	1	-1.70719	-0.196006	strong
chr3	101263573	101263573	1	-	rs1019677	C	T	SNV	c(-4, 6)	RUNX1	jaspar2018	MA0002.2	MA0002.2	agcattaaacCacagtaagtc	0.995282	0.776778	8.93412	7.00874	3.09944e-06	0.00405741	1	-1.92538	-0.214511	strong
chr3	101263573	101263573	1	-	rs1019677	C	T	SNV	c(-5, 9)	RUNX2	jaspar2018	MA0511.1	MA0511.1	gcaaagcattaaacCacagtaagtcctca	0.968535	0.793587	11.2051	9.21652	1.14487e-05	0.00156794	1	-1.98861	-0.171983	strong
chr3	101263573	101263573	1	+	rs1019677	C	T	SNV	c(-4, 5)	RUNX3	jaspar2018	MA0684.1	MA0684.1	gcattaaacCacagtaagt	0.940676	0.746224	9.6675	7.70266	9.63211e-05	0.0060873	1	-1.96485	-0.191376	strong
chr19	1021784	1021784	1	-	rs10417845	G	A	SNV	c(-3, 10)	NFIC::TLX1	jaspar2018	MA0119.1	MA0119.1	ctactcctgcgtgGcgctgtgccacct	0.927105	0.820757	14.0113	12.4402	3.54648e-06	0.000100374	1	-1.57102	-0.104123	strong
chr19	1021784	1021784	1	-	rs10417845	G	A	SNV	c(-14, 2)	PAX1	jaspar2018	MA0779.1	MA0779.1	tctctactcctgcgtgAcgctgtgccacctgcc	0.792694	0.879877	13.3375	14.7953	6.68881e-05	2.68419e-06	1	1.45783	0.0867556	strong
chr19	1021784	1021784	1	+	rs10417845	G	A	SNV	c(-7, 4)	PAX5	jaspar2018	MA0014.3	MA0014.3	actcctgcgtgAcgctgtgccac	0.811542	0.925262	7.83414	8.90052	0.000728846	4.78029e-05	1	1.06638	0.111066	strong
chr19	1021784	1021784	1	-	rs10417845	G	A	SNV	c(-14, 2)	PAX9	jaspar2018	MA0781.1	MA0781.1	tctctactcctgcgtgAcgctgtgccacctgcc	0.742721	0.830326	14.8101	16.5484	0.000192152	1.12358e-05	1	1.73829	0.0872847	strong
chr5	35877914	35877914	1	+	rs10491434	A	G	SNV	c(-12, 2)	HNF1A	jaspar2018	MA0046.2	MA0046.2	acttctaatgactaActcaaagtcaaggc	0.817196	0.740499	11.4292	10.3717	9.38885e-05	0.000713715	1	-1.05752	-0.075809	strong
chr5	35877914	35877914	1	+	rs10491434	A	G	SNV	c(-2, 13)	Hnf4a	jaspar2018	MA0114.3	MA0114.3	gacttctaatgactaGctcaaagtcaaggca	0.731453	0.830806	14.6724	16.6499	0.000299459	1.46844e-05	1	1.97756	0.098791	strong
chr5	35877914	35877914	1	+	rs10491434	A	G	SNV	c(-3, 11)	LEF1	jaspar2018	MA0768.1	MA0768.1	acttctaatgactaGctcaaagtcaaggc	0.766752	0.829881	12.3745	13.3764	0.000436263	8.97562e-05	1	1.00186	0.0623197	strong
chr5	35877914	35877914	1	+	rs10491434	A	G	SNV	c(-3, 8)	TCF7L1	jaspar2018	MA1421.1	MA1421.1	tctaatgactaGctcaaagtcaa	0.792328	0.845983	11.9054	12.7006	0.000225067	4.77433e-05	1	0.795205	0.0530729	strong
chr1	172814663	172814663	1	-	rs10753063	T	C	SNV	c(-3, 6)	Klf4	jaspar2018	MA0039.2	MA0039.2	tggctgtccCcacccaggg	0.928095	0.965048	10.2252	10.6274	0.000150681	3.43323e-05	1	0.402137	0.0365324	weak
chr1	172814663	172814663	1	+	rs10753063	T	C	SNV	c(-3, 6)	KLF5	jaspar2018	MA0599.1	MA0599.1	tggctgtccCcacccaggg	0.929767	0.984591	10.6774	11.305	0.000148773	1.81198e-05	1	0.627576	0.0546605	weak
chr1	172853024	172853024	1	+	rs10912489	A	G	SNV	c(-5, 5)	E2F1	jaspar2018	MA0024.2	MA0024.2	ccagggtggcGggagtgtggg	0.778742	0.958973	8.59876	10.5873	0.00381756	3.93391e-05	1	1.98858	0.180124	strong
chr1	172853024	172853024	1	-	rs10912489	A	G	SNV	c(-10, 4)	E2F3	jaspar2018	MA0469.1	MA0469.1	aaatccagggtggcGggagtgtgggcttg	0.813556	0.969985	10.5303	12.5252	0.000902578	9.04873e-06	1	1.99488	0.154546	strong
chr1	172853024	172853024	1	+	rs10912489	A	G	SNV	c(-4, 6)	E2F4	jaspar2018	MA0470.1	MA0470.1	ccagggtggcGggagtgtggg	0.791408	0.959189	9.44469	11.4379	0.00208068	4.86374e-05	1	1.99322	0.167178	strong
chr1	172853024	172853024	1	+	rs10912489	A	G	SNV	c(-4, 6)	E2F6	jaspar2018	MA0471.1	MA0471.1	ccagggtggcGggagtgtggg	0.797042	0.961512	9.53821	11.4985	0.00147486	3.29018e-05	1	1.96027	0.16394	strong
chr1	172853024	172853024	1	-	rs10912489	A	G	SNV	c(-2, 8)	KLF16	jaspar2018	MA0741.1	MA0741.1	ccagggtggcGggagtgtggg	0.77594	0.89968	8.87681	10.2732	0.0015347	8.39233e-05	1	1.39641	0.122435	strong
chr1	172853024	172853024	1	-	rs10912489	A	G	SNV	c(-10, 4)	SP2	jaspar2018	MA0516.1	MA0516.1	aaatccagggtggcGggagtgtgggcttg	0.759062	0.906961	8.83322	10.5232	0.00280424	7.18236e-05	1	1.69001	0.145862	strong
chr1	172853024	172853024	1	-	rs10912489	A	G	SNV	c(-3, 8)	SP8	jaspar2018	MA0747.1	MA0747.1	tccagggtggcGggagtgtgggc	0.767631	0.889872	7.47022	8.63537	0.00183499	8.744e-05	1	1.16515	0.120304	strong
chr1	172853024	172853024	1	+	rs10912489	A	G	SNV	c(-8, 2)	Spz1	jaspar2018	MA0111.1	MA0111.1	ccagggtggcAggagtgtggg	0.865019	0.768141	6.07555	5.4156	6.27041e-05	0.000954628	1	-0.659954	-0.0943455	weak
chr6	159498267	159498267	1	-	rs1107943	T	C	SNV	c(-5, 5)	Gfi1b	jaspar2018	MA0483.1	MA0483.1	ccagtgcctgTgatttcccca	0.945534	0.897496	10.947	10.3953	1.54972e-05	0.000111341	1	-0.551777	-0.0476794	weak
chr7	37402490	37402490	1	-	rs111796602	T	C	SNV	c(-5, 4)	MAX	jaspar2018	MA0058.2	MA0058.2	aaagacatgTgagtggaag	0.95954	0.801789	11.4846	9.60789	0.000103951	0.00172043	1	-1.8767	-0.156837	strong
chr7	37402490	37402490	1	+	rs111796602	T	C	SNV	c(-6, 4)	USF2	jaspar2018	MA0526.1	MA0526.1	taaagacatgTgagtggaagt	0.938162	0.774219	11.4953	9.49635	8.65459e-05	0.00227475	1	-1.99892	-0.163187	strong
chr12	48213720	48213720	1	+	rs113736796	C	G	SNV	c(-13, 6)	Pax5	jaspar2018	MA0014.1	MA0014.1	gggggagggccctggcagcGcggccggccgggtaggatg	0.75607	0.8639	4.92328	5.56809	0.0036483	7.97572e-05	1	0.644813	0.101037	weak
chr12	48213720	48213720	1	+	rs113736796	C	G	SNV	c(-3, 9)	TFAP2B(var.3)	jaspar2018	MA0813.1	MA0813.1	ggccctggcagcCcggccggccggg	0.905746	0.759571	11.3463	9.53341	7.79629e-05	0.00243178	1	-1.81291	-0.144856	strong
chr8	129588843	129588843	1	-	rs115475689	C	T	SNV	c(-9, 1)	NFKB1	jaspar2018	MA0105.3	MA0105.3	atggaaatccCaaacccatct	0.971681	0.819567	12.0283	10.1574	1.93119e-05	0.000778913	1	-1.87085	-0.151161	strong
chr8	129588843	129588843	1	-	rs115475689	C	T	SNV	c(-8, 1)	REL	jaspar2018	MA0101.1	MA0101.1	tggaaatccCaaacccatc	0.987957	0.851028	7.25911	6.2781	9.53674e-06	0.000448227	1	-0.981015	-0.133555	strong
chr8	129588843	129588843	1	-	rs115475689	C	T	SNV	c(-8, 1)	RELA	jaspar2018	MA0107.1	MA0107.1	tggaaatccCaaacccatc	0.962014	0.842505	10.6318	9.33382	1.71661e-05	0.000352859	1	-1.29802	-0.117527	strong
chr2	231090015	231090015	1	+	rs11695193	T	A	SNV	c(-8, 8)	BCL6B	jaspar2018	MA0731.1	MA0731.1	cctctgtctgctttcaAggagtgctaagagcat	0.755756	0.825794	21.2922	23.2636	2.06584e-05	1.36538e-06	1	1.97143	0.0699903	strong
chr3	71505567	71505567	1	-	rs11720951	C	T	SNV	c(-3, 6)	Arntl	jaspar2018	MA0603.1	MA0603.1	ttttcagcaCgtgagacct	0.983135	0.83279	9.89351	8.40545	3.14713e-05	0.00122166	1	-1.48806	-0.147912	strong
chr3	71505567	71505567	1	-	rs11720951	C	T	SNV	c(-5, 5)	Bhlhe40	jaspar2018	MA0464.1	MA0464.1	tttttcagcaCgtgagacctg	0.994779	0.947018	11.4972	10.9478	3.09944e-06	6.4373e-05	1	-0.549365	-0.0475342	weak
chr3	71505567	71505567	1	-	rs11720951	C	T	SNV	c(-4, 5)	BHLHE40	jaspar2018	MA0464.2	MA0464.2	ttttcagcaCgtgagacct	0.990328	0.828065	11.647	9.75346	2.86102e-05	0.00117493	1	-1.89358	-0.16102	strong
chr3	71505567	71505567	1	+	rs11720951	C	T	SNV	c(-4, 5)	BHLHE41	jaspar2018	MA0636.1	MA0636.1	ttttcagcaCgtgagacct	0.92477	0.787319	13.3378	11.3585	3.14713e-05	0.000862122	1	-1.97928	-0.137249	strong
chr3	71505567	71505567	1	+	rs11720951	C	T	SNV	c(-3, 4)	Id2	jaspar2018	MA0617.1	MA0617.1	ttcagcaCgtgagac	1	0.837351	12.2591	10.2711	0	0.000244141	1	-1.98798	-0.162164	strong
chr3	71505567	71505567	1	+	rs11720951	C	T	SNV	c(-5, 4)	MAX	jaspar2018	MA0058.1	MA0058.1	ttttcagcaCgtgagacct	0.987829	0.826136	9.52167	7.99256	5.72205e-05	0.00145912	1	-1.52911	-0.158675	strong
chr3	71505567	71505567	1	+	rs11720951	C	T	SNV	c(-4, 5)	MAX	jaspar2018	MA0058.3	MA0058.3	ttttcagcaCgtgagacct	0.994163	0.851572	10.7901	9.25277	5.81741e-05	0.000430107	1	-1.53735	-0.141652	strong
chr3	71505567	71505567	1	-	rs11720951	C	T	SNV	c(-4, 5)	MLX	jaspar2018	MA0663.1	MA0663.1	ttttcagcaCgtgagacct	0.922134	0.778266	12.4831	10.5482	3.43323e-05	0.00106812	1	-1.93489	-0.143003	strong
chr3	71505567	71505567	1	+	rs11720951	C	T	SNV	c(-3, 4)	Mlxip	jaspar2018	MA0622.1	MA0622.1	ttcagcaCgtgagac	0.992469	0.828752	12.0854	10.0974	7.62939e-05	0.00161743	1	-1.98797	-0.163258	strong
chr3	71505567	71505567	1	-	rs11720951	C	T	SNV	c(-4, 5)	MLXIPL	jaspar2018	MA0664.1	MA0664.1	ttttcagcaCgtgagacct	0.978301	0.834139	11.5526	9.86443	2.86102e-05	0.000431061	1	-1.6882	-0.142986	strong
chr3	71505567	71505567	1	+	rs11720951	C	T	SNV	c(-4, 3)	Mycn	jaspar2018	MA0104.3	MA0104.3	ttcagcaCgtgagac	0.934958	0.819586	11.5847	10.1585	7.62939e-05	0.00161743	1	-1.42616	-0.115118	strong
chr3	71505567	71505567	1	+	rs11720951	C	T	SNV	c(-4, 5)	Srebf1(var.2)	jaspar2018	MA0829.1	MA0829.1	ttttcagcaCgtgagacct	0.892845	0.772667	12.1428	10.5133	4.48227e-05	0.000972748	1	-1.62951	-0.119855	strong
chr3	71505567	71505567	1	+	rs11720951	C	T	SNV	c(-4, 5)	SREBF2(var.2)	jaspar2018	MA0828.1	MA0828.1	ttttcagcaCgtgagacct	0.887284	0.762061	12.5739	10.8021	4.29153e-05	0.000998497	1	-1.77178	-0.125049	strong
chr3	71505567	71505567	1	+	rs11720951	C	T	SNV	c(-4, 5)	TFE3	jaspar2018	MA0831.1	MA0831.1	ttttcagcaCgtgagacct	0.981397	0.869545	7.99452	7.1028	3.33786e-05	0.00144196	1	-0.891719	-0.10951	strong
chr3	71505567	71505567	1	+	rs11720951	C	T	SNV	c(-2, 5)	TFE3	jaspar2018	MA0831.2	MA0831.2	ttcagcaCgtgagac	0.96079	0.871863	9.4039	8.54124	4.57764e-05	0.000686646	1	-0.862659	-0.0881679	strong
chr3	71505567	71505567	1	+	rs11720951	C	T	SNV	c(-4, 5)	TFEB	jaspar2018	MA0692.1	MA0692.1	ttttcagcaCgtgagacct	0.956145	0.876902	9.45154	8.67944	4.1008e-05	0.000460625	1	-0.772101	-0.0781571	strong
chr3	71505567	71505567	1	+	rs11720951	C	T	SNV	c(-4, 5)	TFEC	jaspar2018	MA0871.1	MA0871.1	ttttcagcaCgtgagacct	0.986872	0.917428	8.52782	7.93548	1.04904e-05	0.000288963	1	-0.592341	-0.0685596	weak
chr3	71505567	71505567	1	-	rs11720951	C	T	SNV	c(-6, 9)	USF2	jaspar2018	MA0526.2	MA0526.2	tctcatttttcagcaCgtgagacctgattca	0.901907	0.798574	11.8055	10.4718	7.04569e-05	0.000638146	1	-1.33365	-0.102027	strong
chr3	71505567	71505567	1	-	rs11720951	C	T	SNV	c(-9, 5)	ZSCAN4	jaspar2018	MA1155.1	MA1155.1	ctcatttttcagcaTgtgagacctgattc	0.735426	0.835939	14.3955	16.3481	0.000386183	1.98446e-05	1	1.95257	0.0999514	strong
chr11	60692869	60692869	1	+	rs12285866	T	C	SNV	c(-13, 7)	IRF3	jaspar2018	MA1418.1	MA1418.1	cacagaagacagagggacagCgaaacattctctgccctccc	0.778777	0.803533	16.7737	17.2995	3.94933e-05	1.69762e-05	1	0.525779	0.0244865	weak
chr11	60692869	60692869	1	+	rs12285866	T	C	SNV	c(-8, 6)	IRF9	jaspar2018	MA0653.1	MA0653.1	agacagagggacagCgaaacattctctgc	0.72494	0.757574	17.1312	17.8994	0.000176203	6.76457e-05	1	0.76824	0.0325436	strong
chr2	231183091	231183091	1	+	rs12466273	G	A	SNV	c(1, 7)	EHF	jaspar2018	MA0598.1	MA0598.1	aaggtgcActtcctg	0.961034	0.99887	12.4521	12.9423	9.15527e-05	3.05176e-05	1	0.490146	0.0378289	weak
chr2	231183091	231183091	1	-	rs12466273	G	A	SNV	c(-1, 10)	EHF	jaspar2018	MA0598.2	MA0598.2	aacgaaggtgcActtcctgtttg	0.801158	0.886632	10.7326	11.8569	0.000440419	4.21405e-05	1	1.12437	0.0842337	strong
chr2	231183091	231183091	1	-	rs12466273	G	A	SNV	c(-1, 10)	ELF1	jaspar2018	MA0473.2	MA0473.2	aacgaaggtgcActtcctgtttg	0.770931	0.856348	11.606	12.8775	0.000634909	7.93934e-05	1	1.27145	0.0846744	strong
chr2	231183091	231183091	1	-	rs12466273	G	A	SNV	c(-1, 11)	ELF1	jaspar2018	MA0473.1	MA0473.1	taacgaaggtgcActtcctgtttga	0.959354	0.996401	11.6722	12.1175	1.08629e-05	1.3411e-07	1	0.445284	0.0366164	weak
chr2	231183091	231183091	1	-	rs12466273	G	A	SNV	c(-2, 10)	ELF3	jaspar2018	MA0640.1	MA0640.1	taacgaaggtgcActtcctgtttga	0.75686	0.855316	12.0912	13.65	0.000601366	4.21852e-05	1	1.55883	0.0977887	strong
chr2	231183091	231183091	1	-	rs12466273	G	A	SNV	c(-1, 10)	ELF4	jaspar2018	MA0641.1	MA0641.1	aacgaaggtgcActtcctgtttg	0.786709	0.873779	11.7882	13.0777	0.000413597	3.70741e-05	1	1.28956	0.0862745	strong
chr2	231183091	231183091	1	-	rs12466273	G	A	SNV	c(-1, 8)	ERF	jaspar2018	MA0760.1	MA0760.1	cgaaggtgcActtcctgtt	0.84601	0.909291	9.53172	10.2377	0.000271797	4.3869e-05	1	0.705968	0.0627547	strong
chr2	231183091	231183091	1	-	rs12466273	G	A	SNV	c(-1, 8)	ETV6	jaspar2018	MA0645.1	MA0645.1	cgaaggtgcActtcctgtt	0.864215	0.942186	9.71963	10.5857	0.000527382	7.62939e-05	1	0.86606	0.0771349	strong
chr2	231183091	231183091	1	-	rs12466273	G	A	SNV	c(-2, 12)	Spi1	jaspar2018	MA0080.3	MA0080.3	cataacgaaggtgcActtcctgtttgatg	0.901229	0.954889	10.7981	11.4296	2.59634e-05	9.82545e-07	1	0.631431	0.0527935	weak
chr2	231183091	231183091	1	-	rs12466273	G	A	SNV	c(1, 6)	SPI1	jaspar2018	MA0080.2	MA0080.2	aggtgcActtcct	0.934622	1	7.41801	7.92911	6.10352e-05	0	1	0.511103	0.0644591	weak
chr2	231183091	231183091	1	-	rs12466273	G	A	SNV	c(-1, 12)	SPI1	jaspar2018	MA0080.4	MA0080.4	ataacgaaggtgcActtcctgtttgat	0.739675	0.82687	15.0949	16.8653	0.000259727	1.95466e-05	1	1.77032	0.086864	strong
chr17	4458790	4458790	1	+	rs12603519	G	A	SNV	c(-7, 3)	YY2	jaspar2018	MA0748.1	MA0748.1	catttccgccAtagctctgag	0.828283	0.967577	8.72087	10.1515	0.00107718	4.48227e-05	1	1.43068	0.136456	strong
chr16	11208322	11208322	1	-	rs12924985	G	C	SNV	c(-7, 4)	PAX5	jaspar2018	MA0014.3	MA0014.3	cctgagtgtcaCgcagggaggct	0.801891	0.922097	7.74364	8.87084	0.000931025	5.60284e-05	1	1.1272	0.1174	strong
chr16	11208322	11208322	1	+	rs12924985	G	C	SNV	c(-12, 4)	PBX3	jaspar2018	MA1114.1	MA1114.1	ccactcctgagtgtcaGgcagggaggctgccac	0.896435	0.827639	10.1963	9.44211	1.07541e-05	0.000105914	1	-0.754167	-0.0665544	strong
chr16	11208322	11208322	1	-	rs12924985	G	C	SNV	c(-8, 4)	SMAD2::SMAD3::SMAD4	jaspar2018	MA0513.1	MA0513.1	tcctgagtgtcaGgcagggaggctg	0.898915	0.730924	10.8186	8.83189	6.82175e-05	0.00349128	1	-1.98674	-0.165368	strong
chr3	58318464	58318464	1	-	rs180977001	A	C	SNV	c(-6, 5)	INSM1	jaspar2018	MA0155.1	MA0155.1	agcgcaggcccCtggcagccgcg	0.770887	0.929855	8.3151	10.0028	0.0016585	1.24574e-05	1	1.68774	0.157035	strong
chr4	40307564	40307564	1	-	rs13136820	C	T	SNV	c(-5, 3)	ELK4	jaspar2018	MA0076.1	MA0076.1	tactgttcCggtttcca	0.905979	0.753491	9.9261	8.28695	8.39233e-05	0.00223541	1	-1.63915	-0.149875	strong
chr4	40307564	40307564	1	-	rs13136820	C	T	SNV	c(-6, 4)	ETV2	jaspar2018	MA0762.1	MA0762.1	ggtactgttcCggtttccaag	0.890851	0.739676	11.8252	9.83109	6.84261e-05	0.00223279	1	-1.99414	-0.150331	strong
chr4	40307564	40307564	1	-	rs13136820	C	T	SNV	c(-6, 3)	FLI1	jaspar2018	MA0475.2	MA0475.2	gtactgttcCggtttccaa	0.910546	0.741961	10.8574	8.86061	7.05719e-05	0.00337791	1	-1.99681	-0.16756	strong
chr4	40307564	40307564	1	-	rs13136820	C	T	SNV	c(-6, 14)	IRF3	jaspar2018	MA1418.1	MA1418.1	cttcttggttggtactgttcCggtttccaagggaccaacgg	0.757699	0.671373	16.326	14.4926	7.83015e-05	0.000913331	1	-1.83345	-0.0853873	strong
chr4	40307564	40307564	1	-	rs13136820	C	T	SNV	c(-6, 8)	IRF4	jaspar2018	MA1419.1	MA1419.1	ggttggtactgttcCggtttccaagggac	0.823939	0.733629	18.1123	16.1347	1.67331e-05	0.000254992	1	-1.9776	-0.0900229	strong
chr4	40307564	40307564	1	-	rs13136820	C	T	SNV	c(-5, 8)	IRF5	jaspar2018	MA1420.1	MA1420.1	gttggtactgttcCggtttccaaggga	0.818319	0.783978	10.592	10.1589	8.38004e-05	0.000230111	1	-0.433072	-0.0336154	weak
chr4	40307564	40307564	1	-	rs13136820	C	T	SNV	c(-5, 8)	IRF8	jaspar2018	MA0652.1	MA0652.1	gttggtactgttcCggtttccaaggga	0.817029	0.723311	17.4416	15.4434	2.23853e-05	0.000355352	1	-1.99814	-0.0936218	strong
chr4	40307564	40307564	1	-	rs13136820	C	T	SNV	c(-5, 9)	IRF9	jaspar2018	MA0653.1	MA0653.1	ggttggtactgttcCggtttccaagggac	0.758332	0.674069	17.9173	15.9336	6.56787e-05	0.0007085	1	-1.98365	-0.08403	strong
chr4	40307564	40307564	1	-	rs13136820	C	T	SNV	c(-6, 7)	STAT1	jaspar2018	MA0137.1	MA0137.1	gttggtactgttcCggtttccaaggga	0.834944	0.715173	11.0967	9.54723	8.839e-05	0.00164573	1	-1.54944	-0.117098	strong
chr2	231025209	231025209	1	+	rs13400142	G	C	SNV	c(-11, 8)	RREB1	jaspar2018	MA0073.1	MA0073.1	ctccgccaccccgccacagCctcaagcgattcccttgcc	0.717168	0.794736	9.43084	10.4081	0.00064682	5.20808e-05	1	0.977303	0.0752099	strong
chr2	231025209	231025209	1	+	rs13400142	G	C	SNV	c(-8, 2)	TFAP2A	jaspar2018	MA0003.3	MA0003.3	cccgccacagGctcaagcgat	0.964804	0.916694	9.16248	8.70933	3.31402e-05	0.000180483	1	-0.453159	-0.047731	weak
chr2	231025209	231025209	1	+	rs13400142	G	C	SNV	c(-8, 2)	TFAP2B(var.2)	jaspar2018	MA0812.1	MA0812.1	cccgccacagGctcaagcgat	0.962726	0.860225	10.7939	9.65235	3.8147e-05	0.000432968	1	-1.14157	-0.101844	strong
chr2	231025209	231025209	1	+	rs13400142	G	C	SNV	c(-11, 3)	TFAP2C	jaspar2018	MA0524.1	MA0524.1	ccaccccgccacagGctcaagcgattccc	0.935356	0.824995	9.95341	8.79836	7.34478e-05	0.00141153	1	-1.15505	-0.10866	strong
chr2	231025209	231025209	1	+	rs13400142	G	C	SNV	c(-8, 2)	TFAP2C(var.2)	jaspar2018	MA0814.1	MA0814.1	cccgccacagGctcaagcgat	0.963048	0.890568	9.54272	8.83159	4.3869e-05	0.000253916	1	-0.711139	-0.0717939	strong
chr19	1067931	1067931	1	-	rs141322928	A	G	SNV	c(-12, 8)	REST	jaspar2018	MA0138.2	MA0138.2	agaggttggggagtgtccccGggcctggggtgtctacaaag	0.692202	0.758045	14.2229	15.5346	0.000380648	5.01392e-05	1	1.31165	0.0644401	strong
chr19	1067931	1067931	1	+	rs141322928	A	G	SNV	c(-11, 7)	REST	jaspar2018	MA0138.1	MA0138.1	aggttggggagtgtccccGggcctggggtgtctacaa	0.689102	0.752188	12.0546	13.1255	0.000426295	6.07123e-05	1	1.07089	0.0617866	strong
chr19	1192614	1192614	1	-	rs143416020	C	T	SNV	c(-5, 8)	Zfx	jaspar2018	MA0146.1	MA0146.1	tgggcgtggaggcCgggcgcaggggcg	0.950469	0.798899	10.9096	9.19706	9.91188e-05	0.00159518	1	-1.71256	-0.149318	strong
chr19	1192614	1192614	1	-	rs143416020	C	T	SNV	c(-5, 8)	Zfx	jaspar2018	MA0146.2	MA0146.2	tgggcgtggaggcCgggcgcaggggcg	0.95087	0.798343	10.9639	9.23249	9.8899e-05	0.00162541	1	-1.73144	-0.150277	strong
chr19	1026844	1026844	1	-	rs147767045	C	G	SNV	c(-7, 4)	HINFP	jaspar2018	MA0131.2	MA0131.2	cccggggcggaCgggcccttgtt	0.954102	0.82005	11.0726	9.53052	4.73857e-05	0.00086534	1	-1.54206	-0.13293	strong
chr19	1026844	1026844	1	-	rs147767045	C	G	SNV	c(-9, 1)	SP1	jaspar2018	MA0079.3	MA0079.3	ccggggcggaGgggcccttgt	0.872382	0.921646	10.1861	10.7581	0.000337362	6.60419e-05	1	0.572054	0.0490276	weak
chr21	34753093	34753093	1	+	rs149507761	C	T	SNV	c(-5, 8)	Bcl6	jaspar2018	MA0463.1	MA0463.1	aggtctgtgctccTggaaatccacatt	0.732888	0.860934	8.59233	10.0541	0.00233033	0.000101257	1	1.46175	0.125562	strong
chr21	34753093	34753093	1	+	rs149507761	C	T	SNV	c(-4, 7)	EHF	jaspar2018	MA0598.2	MA0598.2	gtctgtgctccCggaaatccaca	0.858809	0.768937	11.4909	10.3087	9.25064e-05	0.000888705	1	-1.18222	-0.0885675	strong
chr21	34753093	34753093	1	+	rs149507761	C	T	SNV	c(-4, 7)	ELF1	jaspar2018	MA0473.2	MA0473.2	gtctgtgctccCggaaatccaca	0.877941	0.761531	13.1989	11.4661	3.26633e-05	0.000735521	1	-1.73279	-0.115398	strong
chr21	34753093	34753093	1	+	rs149507761	C	T	SNV	c(-2, 7)	ELK3	jaspar2018	MA0759.1	MA0759.1	ctgtgctccCggaaatcca	0.929981	0.783707	9.82404	8.30035	6.86646e-05	0.00209808	1	-1.52369	-0.144379	strong
chr21	34753093	34753093	1	-	rs149507761	C	T	SNV	c(-2, 8)	ELK4	jaspar2018	MA0076.2	MA0076.2	tctgtgctccCggaaatccac	0.92492	0.823867	10.9061	9.72458	7.1764e-05	0.000893354	1	-1.18148	-0.100262	strong
chr21	34753093	34753093	1	+	rs149507761	C	T	SNV	c(-2, 7)	ERG	jaspar2018	MA0474.2	MA0474.2	ctgtgctccCggaaatcca	0.946441	0.825068	9.69737	8.46385	5.05447e-05	0.00144863	1	-1.23352	-0.120441	strong
chr21	34753093	34753093	1	+	rs149507761	C	T	SNV	c(-2, 7)	ETS1	jaspar2018	MA0098.3	MA0098.3	ctgtgctccCggaaatcca	0.935154	0.819356	9.8424	8.63602	5.81741e-05	0.00129223	1	-1.20638	-0.114697	strong
chr21	34753093	34753093	1	+	rs149507761	C	T	SNV	c(-2, 7)	ETV1	jaspar2018	MA0761.1	MA0761.1	ctgtgctccCggaaatcca	0.937254	0.787174	8.78271	7.39823	0.000104904	0.00379276	1	-1.38448	-0.14789	strong
chr21	34753093	34753093	1	+	rs149507761	C	T	SNV	c(-2, 7)	ETV3	jaspar2018	MA0763.1	MA0763.1	ctgtgctccCggaaatcca	0.896801	0.769874	8.81938	7.58898	6.58035e-05	0.00159264	1	-1.2304	-0.125298	strong
chr21	34753093	34753093	1	+	rs149507761	C	T	SNV	c(-2, 7)	ETV4	jaspar2018	MA0764.1	MA0764.1	ctgtgctccCggaaatcca	0.950446	0.804557	8.78552	7.45555	8.4877e-05	0.00379467	1	-1.32997	-0.143979	strong
chr21	34753093	34753093	1	+	rs149507761	C	T	SNV	c(-2, 7)	FEV	jaspar2018	MA0156.2	MA0156.2	ctgtgctccCggaaatcca	0.935713	0.797674	9.69287	8.27818	6.00815e-05	0.0023489	1	-1.41468	-0.136662	strong
chr21	34753093	34753093	1	+	rs149507761	C	T	SNV	c(-2, 7)	FLI1	jaspar2018	MA0475.2	MA0475.2	ctgtgctccCggaaatcca	0.924115	0.793421	11.0181	9.47012	6.19888e-05	0.00130081	1	-1.548	-0.129899	strong
chr19	49178395	49178395	1	-	rs182528875	G	C	SNV	c(-4, 8)	ZNF24	jaspar2018	MA1124.1	MA1124.1	gtcatgaggactGaatgagctgaca	0.816848	0.716236	12.8722	11.3292	3.48091e-05	0.000597641	1	-1.54304	-0.0984008	strong
chr5	35785826	35785826	1	+	rs184316044	T	C	SNV	c(-5, 15)	IRF1	jaspar2018	MA0050.2	MA0050.2	gtttttttaattttcttctcCtttcttttttttttttgtag	0.882488	0.910326	13.6142	14.0339	1.9033e-05	6.08416e-06	1	0.419765	0.0272821	weak
chr5	35785826	35785826	1	-	rs184316044	T	C	SNV	c(-7, 6)	Mecom	jaspar2018	MA0029.1	MA0029.1	taattttcttctcTtttcttttttttt	0.889643	0.843395	12.722	12.0723	1.13696e-05	5.86063e-05	1	-0.649664	-0.0455196	weak
chr5	35785826	35785826	1	-	rs184316044	T	C	SNV	c(-3, 11)	PRDM1	jaspar2018	MA0508.1	MA0508.1	ttaattttcttctcCtttctttttttttt	0.746103	0.841937	9.90763	11.1482	0.00110369	9.36994e-05	1	1.24058	0.0940236	strong
chr20	44650847	44650847	1	+	rs188065124	T	G	SNV	c(-16, 4)	ZNF263	jaspar2018	MA0528.1	MA0528.1	tcaaggtggagagtaggccgGagggcactaaaggggcgggg	0.750466	0.816787	8.54876	9.2739	0.000159952	9.78247e-06	1	0.725143	0.0643021	strong
chr2	102857758	102857758	1	+	rs190620239	C	T	SNV	c(-6, 4)	FOXA1	jaspar2018	MA0148.2	MA0148.2	gccctgtttaCtatgtgctcg	0.981631	0.867681	10.4358	9.23679	4.29153e-06	0.000293255	1	-1.19899	-0.112803	strong
chr2	102857758	102857758	1	+	rs190620239	C	T	SNV	c(-6, 4)	FOXA1	jaspar2018	MA0148.1	MA0148.1	gccctgtttaCtatgtgctcg	0.98204	0.868581	10.3562	9.17295	4.29153e-06	0.000289917	1	-1.18321	-0.112222	strong
chr2	102857758	102857758	1	+	rs190620239	C	T	SNV	c(-10, 4)	FOXA1	jaspar2018	MA0148.3	MA0148.3	gcaggccctgtttaCtatgtgctcgcaag	0.971204	0.846325	11.2099	9.7787	1.04709e-05	0.000481617	1	-1.43121	-0.124022	strong
chr2	102857758	102857758	1	+	rs190620239	C	T	SNV	c(-6, 5)	Foxa2	jaspar2018	MA0047.2	MA0047.2	ggccctgtttaCtatgtgctcgc	0.97402	0.867687	10.838	9.66576	5.72205e-06	0.000281155	1	-1.17219	-0.105372	strong
chr2	102857758	102857758	1	-	rs190620239	C	T	SNV	c(-7, -1)	FOXD1	jaspar2018	MA0031.1	MA0031.1	ctgtttaCtatgtgc	0.995408	0.909976	9.42299	8.63059	3.05176e-05	0.000152588	1	-0.792403	-0.0837141	strong
chr2	102857758	102857758	1	-	rs190620239	C	T	SNV	c(-8, 5)	FOXF2	jaspar2018	MA0030.1	MA0030.1	caggccctgtttaCtatgtgctcgcaa	0.956042	0.913988	11.2141	10.7309	3.24324e-05	0.00010214	1	-0.483236	-0.0412344	weak
chr2	102857758	102857758	1	-	rs190620239	C	T	SNV	c(-6, -1)	FOXI1	jaspar2018	MA0042.2	MA0042.2	tgtttaCtatgtg	1	0.896218	10.9787	9.84238	0	0.000244141	1	-1.13636	-0.103506	strong
chr2	102857758	102857758	1	-	rs190620239	C	T	SNV	c(-11, 5)	Foxk1	jaspar2018	MA0852.1	MA0852.1	cagcaggccctgtttaCtatgtgctcgcaagag	0.87728	0.824045	11.4163	10.738	5.98312e-05	0.000254869	1	-0.678363	-0.0522617	weak
chr2	102857758	102857758	1	-	rs190620239	C	T	SNV	c(-10, 3)	FOXK1	jaspar2018	MA0852.2	MA0852.2	caggccctgtttaCtatgtgctcgcaa	0.991396	0.91379	10.1803	9.39871	8.34465e-06	6.93798e-05	1	-0.781628	-0.0761301	strong
chr2	102857758	102857758	1	+	rs190620239	C	T	SNV	c(-9, 1)	Foxo1	jaspar2018	MA0480.1	MA0480.1	gccctgtttaCtatgtgctcg	0.988609	0.921585	11.6925	10.9048	2.86102e-06	0.000105619	1	-0.787601	-0.0665974	strong
chr2	102857758	102857758	1	-	rs190620239	C	T	SNV	c(-7, -1)	FOXO3	jaspar2018	MA0157.2	MA0157.2	ctgtttaCtatgtgc	0.976191	0.848812	12.4255	10.807	3.05176e-05	0.000610352	1	-1.61851	-0.127161	strong
chr2	102857758	102857758	1	-	rs190620239	C	T	SNV	c(-6, -1)	FOXO4	jaspar2018	MA0848.1	MA0848.1	tgtttaCtatgtg	1	0.935076	9.6766	9.05075	0	6.10352e-05	1	-0.625849	-0.0646766	weak
chr2	102857758	102857758	1	-	rs190620239	C	T	SNV	c(-6, -1)	FOXO6	jaspar2018	MA0849.1	MA0849.1	tgtttaCtatgtg	1	0.922293	11.359	10.4763	0	6.10352e-05	1	-0.882643	-0.0777044	strong
chr2	102857758	102857758	1	-	rs190620239	C	T	SNV	c(-9, 5)	FOXP1	jaspar2018	MA0481.1	MA0481.1	gcaggccctgtttaCtatgtgctcgcaag	0.914039	0.877472	11.2077	10.7684	5.56493e-05	0.000184599	1	-0.43924	-0.0358849	weak
chr2	102857758	102857758	1	-	rs190620239	C	T	SNV	c(-9, 2)	FOXP1	jaspar2018	MA0481.2	MA0481.2	ggccctgtttaCtatgtgctcgc	0.998844	0.886672	10.8377	9.63805	5.66244e-06	6.66976e-05	1	-1.1997	-0.11057	strong
chr2	102857758	102857758	1	-	rs190620239	C	T	SNV	c(-8, 2)	FOXP2	jaspar2018	MA0593.1	MA0593.1	gccctgtttaCtatgtgctcg	0.995228	0.937676	12.6504	11.9222	5.48363e-06	6.65188e-05	1	-0.728193	-0.0572895	strong
chr2	102857758	102857758	1	-	rs190620239	C	T	SNV	c(-6, 4)	HOXA10	jaspar2018	MA0899.1	MA0899.1	gccctgtttaTtatgtgctcg	0.819527	0.948869	6.05056	6.97277	0.00283074	0.000101328	1	0.922209	0.125687	strong
chr2	102857758	102857758	1	-	rs190620239	C	T	SNV	c(-5, 11)	ZNF410	jaspar2018	MA0752.1	MA0752.1	cagcaggccctgtttaTtatgtgctcgcaagag	0.695761	0.780646	16.2667	18.2412	0.000438388	4.03587e-05	1	1.97455	0.0845859	strong
chr14	69282887	69282887	1	-	rs194746	C	T	SNV	c(-3, 7)	E2F1	jaspar2018	MA0024.2	MA0024.2	cctctgacttCccgctctttg	0.968108	0.891947	10.6881	9.84781	2.14577e-05	0.00053215	1	-0.840322	-0.0761161	strong
chr14	69282887	69282887	1	-	rs194746	C	T	SNV	c(-4, 6)	E2F4	jaspar2018	MA0470.1	MA0470.1	cctctgacttCccgctctttg	0.962543	0.818608	11.4778	9.76783	4.02927e-05	0.0011313	1	-1.70993	-0.143418	strong
chr14	69282887	69282887	1	-	rs194746	C	T	SNV	c(-4, 6)	E2F6	jaspar2018	MA0471.1	MA0471.1	cctctgacttCccgctctttg	0.963182	0.81179	11.5184	9.71398	2.76566e-05	0.00124097	1	-1.80439	-0.150904	strong
chr14	69282887	69282887	1	-	rs194746	C	T	SNV	c(-5, 6)	EHF	jaspar2018	MA0598.2	MA0598.2	ccctctgacttCccgctctttga	0.870855	0.719362	11.6494	9.65659	7.06911e-05	0.00244045	1	-1.99282	-0.149294	strong
chr14	69282887	69282887	1	-	rs194746	C	T	SNV	c(-5, 7)	ELF1	jaspar2018	MA0473.1	MA0473.1	gccctctgacttCccgctctttgaa	0.915232	0.748927	11.1419	9.14301	9.9048e-05	0.0034458	1	-1.9989	-0.164373	strong
chr14	69282887	69282887	1	-	rs194746	C	T	SNV	c(-6, 6)	ELF3	jaspar2018	MA0640.1	MA0640.1	gccctctgacttCccgctctttgaa	0.847572	0.726018	13.5274	11.6029	5.70118e-05	0.00115712	1	-1.92454	-0.12073	strong
chr14	69282887	69282887	1	-	rs194746	C	T	SNV	c(-5, 6)	ELF4	jaspar2018	MA0641.1	MA0641.1	ccctctgacttCccgctctttga	0.847193	0.714124	12.684	10.7132	0.000100315	0.0022105	1	-1.97084	-0.131854	strong
chr14	69282887	69282887	1	-	rs194746	C	T	SNV	c(-5, 5)	ELF5	jaspar2018	MA0136.2	MA0136.2	cctctgacttCccgctctttg	0.95661	0.871523	8.61608	7.86222	7.20024e-05	0.00170946	1	-0.75386	-0.0837574	strong
chr14	69282887	69282887	1	-	rs194746	C	T	SNV	c(-4, 6)	TFDP1	jaspar2018	MA1122.1	MA1122.1	cctctgacttCccgctctttg	0.98809	0.828905	9.94567	8.3732	3.19481e-05	0.00113201	1	-1.57247	-0.156258	strong
chr19	1031039	1031039	1	-	rs201917431	C	A	SNV	c(-11, -1)	INSM1	jaspar2018	MA0155.1	MA0155.1	tgcccccagccAagctcagtctc	0.891019	0.947112	9.59053	10.186	6.8903e-05	4.35114e-06	1	0.595521	0.0554099	weak
chr19	1031039	1031039	1	+	rs201917431	C	A	SNV	c(-9, 10)	RREB1	jaspar2018	MA0073.1	MA0073.1	gctgggggtgcccccagccAagctcagtctcgtgccctt	0.731354	0.789369	9.60957	10.3405	0.000428152	6.34455e-05	1	0.730951	0.0562515	strong
chr6	14717514	14717514	1	-	rs2144684	A	T	SNV	c(-7, 10)	EWSR1-FLI1	jaspar2018	MA0149.1	MA0149.1	actcggggttctgtgcaTccttacctccctgtgca	0.624901	0.673062	19.3287	20.8104	0.000430499	0.000106664	1	1.48173	0.0480004	strong
chr10	75669190	75669190	1	-	rs2227551	G	C	SNV	c(-2, 12)	Bach1::Mafk	jaspar2018	MA0591.1	MA0591.1	aagcctatagcatcGctgactcagtctgt	0.862156	0.794923	13.9286	12.8552	2.7216e-05	0.000183248	1	-1.07344	-0.0665515	strong
chr10	75669190	75669190	1	-	rs2227551	G	C	SNV	c(-3, 10)	BACH2	jaspar2018	MA1101.1	MA1101.1	agcctatagcatcGctgactcagtctg	0.922032	0.875048	12.1061	11.5027	8.05408e-06	4.3828e-05	1	-0.603415	-0.046036	weak
chr10	75669190	75669190	1	-	rs2227551	G	C	SNV	c(-5, 9)	MAF::NFE2	jaspar2018	MA0501.1	MA0501.1	aagcctatagcatcGctgactcagtctgt	0.843115	0.77685	13.3316	12.2963	4.47454e-05	0.000291175	1	-1.03529	-0.0655963	strong
chr10	75669190	75669190	1	-	rs2227551	G	C	SNV	c(-5, 15)	MAFF	jaspar2018	MA0495.2	MA0495.2	gctctgaagcctatagcatcGctgactcagtctgtcccctg	0.779462	0.711069	10.3727	9.51766	5.30565e-05	0.000412177	1	-0.855038	-0.0651219	strong
chr10	75669190	75669190	1	-	rs2227551	G	C	SNV	c(-4, 14)	MAFK	jaspar2018	MA0496.2	MA0496.2	tctgaagcctatagcatcGctgactcagtctgtcccc	0.789478	0.708926	10.9198	9.85541	4.27657e-05	0.000468095	1	-1.06441	-0.0776847	strong
chr10	75669190	75669190	1	-	rs2227551	G	C	SNV	c(-1, 13)	Nfe2l2	jaspar2018	MA0150.2	MA0150.2	aagcctatagcatcGctgactcagtctgt	0.85528	0.755316	12.0091	10.6371	5.91874e-05	0.000832079	1	-1.37202	-0.0980332	strong
chr19	1075720	1075720	1	-	rs2269846	C	G	SNV	c(-1, 19)	ZNF263	jaspar2018	MA0528.1	MA0528.1	cttcttgggctgcaatgatcCtcccacctcagcctcctgag	0.804532	0.766848	9.13991	8.72787	1.73634e-05	8.56872e-05	1	-0.412032	-0.036537	weak
chr22	37589869	37589869	1	+	rs229536	A	G	SNV	c(-3, 10)	ONECUT3	jaspar2018	MA0757.1	MA0757.1	tttatggagaagaAaatgaataaatgg	0.856982	0.799877	13.2415	12.3719	5.45457e-05	0.000259437	1	-0.869535	-0.0563931	strong
chr22	37589869	37589869	1	-	rs229536	A	G	SNV	c(1, 12)	ZNF24	jaspar2018	MA1124.1	MA1124.1	ttatggagaagaGaatgaataaatg	0.865284	0.901193	13.6151	14.1658	7.28667e-06	1.96695e-06	1	0.550719	0.0351198	weak
chr5	96293929	96293929	1	-	rs2351010	G	A	SNV	c(1, 13)	MTF1	jaspar2018	MA0863.1	MA0863.1	acacctgtgaagcGgtccgagtgcaaa	0.838133	0.77083	15.0612	13.8665	9.81241e-06	9.87425e-05	1	-1.19462	-0.0666109	strong
chr19	1082341	1082341	1	+	rs188956887	C	A	SNV	c(-7, 3)	NFIC	jaspar2018	MA0161.2	MA0161.2	cagcgcttggCagggacccgt	0.998786	0.856139	9.73313	8.36923	4.8399e-05	0.00073123	1	-1.3639	-0.139963	strong
chr16	11358018	11358018	1	-	rs243318	G	A	SNV	c(-2, 7)	MAX	jaspar2018	MA0058.2	MA0058.2	tcttcatacAtgtggccag	0.793383	0.961446	9.50789	11.5073	0.00232124	8.96454e-05	1	1.99937	0.167088	strong
chr12	6572587	6572587	1	+	rs2534713	G	C	SNV	c(-13, 5)	RFX2	jaspar2018	MA0600.1	MA0600.1	catccctgtctttggcaaCtgcacgggtggtgtggag	0.672132	0.806799	9.2172	11.0185	0.00312135	9.72642e-05	1	1.80131	0.132422	strong
chr11	35095486	35095486	1	+	rs2732540	A	G	SNV	c(-4, 5)	ETV6	jaspar2018	MA0645.1	MA0645.1	ggcaaagggGaagtaagct	0.767586	0.940349	8.64632	10.5653	0.00307655	8.10623e-05	1	1.91896	0.17091	strong
chr11	35095486	35095486	1	+	rs2732540	A	G	SNV	c(-13, 4)	EWSR1-FLI1	jaspar2018	MA0149.1	MA0149.1	tgttggaaggcaaagggGaagtaagcttggacctt	0.617992	0.674965	19.1161	20.869	0.000608893	9.62365e-05	1	1.75286	0.0567835	strong
chr11	35095486	35095486	1	+	rs2732540	A	G	SNV	c(-7, 4)	IRF1	jaspar2018	MA0050.1	MA0050.1	aaggcaaagggAaagtaagcttg	0.914226	0.773179	10.835	9.19589	3.65973e-05	0.00109863	1	-1.63915	-0.138537	strong
chr11	35095486	35095486	1	-	rs2732540	A	G	SNV	c(-12, 8)	IRF1	jaspar2018	MA0050.2	MA0050.2	tcatgttggaaggcaaagggAaagtaagcttggaccttctc	0.915125	0.810902	14.1063	12.5347	4.71454e-06	0.000131747	1	-1.57156	-0.102141	strong
chr11	35095486	35095486	1	+	rs2732540	A	G	SNV	c(-8, 9)	IRF2	jaspar2018	MA0051.1	MA0051.1	tgttggaaggcaaagggAaagtaagcttggacctt	0.882609	0.772139	12.1221	10.6541	1.23109e-05	0.000353354	1	-1.46801	-0.107295	strong
chr11	35095486	35095486	1	+	rs2732540	A	G	SNV	c(-15, 5)	IRF3	jaspar2018	MA1418.1	MA1418.1	tcatgttggaaggcaaagggAaagtaagcttggaccttctc	0.790503	0.703216	17.0227	15.1689	2.6617e-05	0.000392895	1	-1.85385	-0.0863372	strong
chr11	35095486	35095486	1	+	rs2732540	A	G	SNV	c(-9, 4)	IRF7	jaspar2018	MA0772.1	MA0772.1	ggaaggcaaagggAaagtaagcttgga	0.851631	0.741501	13.6259	11.8849	5.48586e-05	0.000941742	1	-1.74097	-0.109006	strong
chr11	35095486	35095486	1	-	rs2732540	A	G	SNV	c(-3, 6)	PRDM1	jaspar2018	MA0508.2	MA0508.2	ggcaaagggAaagtaagct	0.982101	0.827128	12.1966	10.2912	2.09808e-05	0.000562668	1	-1.90538	-0.153453	strong
chr11	35095486	35095486	1	+	rs2732540	A	G	SNV	c(-8, 6)	PRDM1	jaspar2018	MA0508.1	MA0508.1	tggaaggcaaagggAaagtaagcttggac	0.961095	0.806827	12.6907	10.6937	8.50298e-07	0.000252156	1	-1.99702	-0.151354	strong
chr11	35095486	35095486	1	+	rs2732540	A	G	SNV	c(-8, 6)	Spi1	jaspar2018	MA0080.3	MA0080.3	tggaaggcaaagggGaagtaagcttggac	0.743347	0.913287	8.94028	10.94	0.0027328	1.42101e-05	1	1.99974	0.167197	strong
chr11	35095486	35095486	1	+	rs2732540	A	G	SNV	c(-8, 5)	SPI1	jaspar2018	MA0080.4	MA0080.4	ggaaggcaaagggGaagtaagcttgga	0.80573	0.903993	16.4361	18.4311	5.19902e-05	1.41934e-06	1	1.99504	0.0978905	strong
chr11	35095486	35095486	1	+	rs2732540	A	G	SNV	c(-8, 5)	SPIC	jaspar2018	MA0687.1	MA0687.1	ggaaggcaaagggGaagtaagcttgga	0.88027	0.977163	9.46093	10.4779	3.99016e-05	2.04891e-07	1	1.01698	0.0948886	strong
chr11	35095486	35095486	1	-	rs2732540	A	G	SNV	c(-8, 6)	STAT1::STAT2	jaspar2018	MA0517.1	MA0517.1	tggaaggcaaagggAaagtaagcttggac	0.8953	0.778553	12.8386	11.1888	1.8104e-05	0.000488946	1	-1.64975	-0.115221	strong
chr10	31379846	31379846	1	+	rs2793109	T	A	SNV	c(-5, 5)	FOXH1	jaspar2018	MA0479.1	MA0479.1	cagcttggaaTccacaaagtt	0.999725	0.841198	12.6447	10.6464	2.38419e-06	0.000501633	1	-1.99825	-0.157988	strong
chr10	31379846	31379846	1	-	rs2793109	T	A	SNV	c(-2, 8)	RUNX1	jaspar2018	MA0002.1	MA0002.1	cagcttggaaAccacaaagtt	0.809065	0.98026	7.079	8.54129	0.00203133	8.10623e-06	1	1.46229	0.167888	strong
chr10	31379846	31379846	1	-	rs2793109	T	A	SNV	c(-2, 8)	RUNX1	jaspar2018	MA0002.2	MA0002.2	cagcttggaaAccacaaagtt	0.933099	0.98835	8.38618	8.87304	0.000189781	5.24521e-06	1	0.486852	0.0542411	weak
chr10	31379846	31379846	1	-	rs2793109	T	A	SNV	c(-3, 11)	RUNX2	jaspar2018	MA0511.1	MA0511.1	aaaacagcttggaaAccacaaagtttggg	0.898867	0.97206	10.4132	11.2452	0.000288431	8.38935e-06	1	0.831969	0.0719523	strong
chr10	31379846	31379846	1	+	rs2793109	T	A	SNV	c(-2, 6)	RUNX2	jaspar2018	MA0511.2	MA0511.2	gcttggaaAccacaaag	0.800495	0.96081	8.36016	10.0056	0.00257111	5.34058e-05	1	1.64542	0.158095	strong
chr10	31379846	31379846	1	+	rs2793109	T	A	SNV	c(-2, 7)	RUNX3	jaspar2018	MA0684.1	MA0684.1	agcttggaaAccacaaagt	0.838544	0.980548	8.63551	10.0704	0.00105667	5.72205e-06	1	1.43489	0.139758	strong
chr4	102268940	102268940	1	+	rs2850328	T	C	SNV	c(1, 9)	NHLH1	jaspar2018	MA0048.2	MA0048.2	ctgttttctCccagctgcc	0.909533	0.947587	10.9378	11.3907	0.000116348	3.14713e-05	1	0.452964	0.0377011	weak
chr4	102268940	102268940	1	+	rs2850328	T	C	SNV	c(-1, 10)	NHLH1	jaspar2018	MA0048.1	MA0048.1	ctctgttttctCccagctgccgg	0.867995	0.916806	10.3418	10.9152	0.000160277	4.40478e-05	1	0.573449	0.0482188	weak
chr1	192544795	192544795	1	+	rs2984920	A	G	SNV	c(-4, 9)	SPI1	jaspar2018	MA0080.4	MA0080.4	gcacaccaagaaaAggggaacttccag	0.884673	0.818221	18.0389	16.6897	4.09782e-06	2.99104e-05	1	-1.34919	-0.0662006	strong
chr5	100240001	100240001	1	+	rs3756355	A	G	SNV	c(-2, 12)	NR1A4::RXRA	jaspar2018	MA1146.1	MA1146.1	ctccaccatcctccGgtcgttgccctcat	0.691653	0.839438	6.91806	8.32523	0.00217651	3.06116e-05	1	1.40716	0.142801	strong
chr5	100240001	100240001	1	+	rs3756355	A	G	SNV	c(-2, 12)	NR4A2::RXRA	jaspar2018	MA1147.1	MA1147.1	ctccaccatcctccGgtcgttgccctcat	0.723641	0.843067	8.40353	9.75793	0.00158081	6.79316e-05	1	1.3544	0.117389	strong
chr17	4458598	4458598	1	-	rs3809849	G	C	SNV	c(-6, 8)	SP2	jaspar2018	MA0516.1	MA0516.1	aggcgacatcggctGggcgggatcccggc	0.90035	0.838933	10.4477	9.74589	9.56031e-05	0.000597314	1	-0.701803	-0.0605714	strong
chr2	102783052	102783052	1	-	rs3917292	G	A	SNV	c(-2, 8)	Hoxa9	jaspar2018	MA0594.1	MA0594.1	cctctggctgAtatatgggaa	0.746891	0.8882	8.82363	10.4805	0.00249672	9.89437e-05	1	1.65691	0.140518	strong
chr6	159421040	159421040	1	-	rs45484795	C	T	SNV	c(-6, 4)	ESRRA	jaspar2018	MA0592.1	MA0592.1	ggtggctgtcCttggcccggc	0.907837	0.770017	11.6259	9.87361	4.69685e-05	0.00139761	1	-1.75233	-0.136925	strong
chr6	159421040	159421040	1	-	rs45484795	C	T	SNV	c(-4, 7)	Esrrb	jaspar2018	MA0141.2	MA0141.2	cggtggctgtcCttggcccggct	0.906901	0.753524	10.759	8.95757	7.13468e-05	0.00198013	1	-1.80138	-0.151985	strong
chr6	159421040	159421040	1	-	rs45484795	C	T	SNV	c(-4, 7)	Esrrb	jaspar2018	MA0141.1	MA0141.1	cggtggctgtcCttggcccggct	0.906789	0.752217	10.6114	8.82167	7.13468e-05	0.00206667	1	-1.78974	-0.153091	strong
chr6	159421040	159421040	1	-	rs45484795	C	T	SNV	c(-6, 8)	Nr5a2	jaspar2018	MA0505.1	MA0505.1	caacggtggctgtcCttggcccggctttg	0.92627	0.791696	12.2678	10.5154	2.40402e-05	0.000795015	1	-1.75238	-0.132476	strong
chr6	159421040	159421040	1	-	rs45484795	C	T	SNV	c(-9, 11)	REST	jaspar2018	MA0138.2	MA0138.2	gcggggcaacggtggctgtcCttggcccggctttggaatgt	0.785918	0.703103	16.0898	14.4401	1.90615e-05	0.000278382	1	-1.64973	-0.08105	strong
chr6	159421040	159421040	1	+	rs45484795	C	T	SNV	c(-8, 10)	REST	jaspar2018	MA0138.1	MA0138.1	ggggcaacggtggctgtcCttggcccggctttggaat	0.775205	0.697118	13.5162	12.1907	2.74564e-05	0.00033774	1	-1.32552	-0.0764777	strong
chr17	4476892	4476892	1	+	rs4790204	C	G	SNV	c(-8, 3)	E2F1	jaspar2018	MA0024.3	MA0024.3	tgcattggcgcCatcccggctca	0.955547	0.866882	10.8744	9.87966	7.27177e-06	0.000267923	1	-0.994705	-0.0874614	strong
chr10	112148510	112148510	1	+	rs4918501	T	G	SNV	c(-12, 4)	PBX3	jaspar2018	MA1114.1	MA1114.1	gagtgtgtgagtgactGtccctgtatccagctg	0.82363	0.890641	9.39816	10.1328	0.000119998	1.55486e-05	1	0.734595	0.0648272	strong
chr10	112148510	112148510	1	-	rs4918501	T	G	SNV	c(-5, 9)	PRDM1	jaspar2018	MA0508.1	MA0508.1	gtgtgtgagtgactTtccctgtatccagc	0.91855	0.812076	12.14	10.7617	8.16491e-06	0.00021651	1	-1.37832	-0.104463	strong
chr10	112148510	112148510	1	+	rs4918501	T	G	SNV	c(-5, 4)	PRDM1	jaspar2018	MA0508.2	MA0508.2	tgagtgactTtccctgtat	0.979263	0.82273	12.1617	10.2372	3.05176e-05	0.000779152	1	-1.92456	-0.154998	strong
chr11	36522260	36522260	1	+	rs5030445	T	C	SNV	c(-5, 9)	HNF4A	jaspar2018	MA0114.2	MA0114.2	gagaagggactggaCtttggatatattat	0.760461	0.921544	8.87252	10.7142	0.00146745	2.01417e-05	1	1.84172	0.158615	strong
chr11	36522260	36522260	1	-	rs5030445	T	C	SNV	c(-4, 10)	HNF4G	jaspar2018	MA0484.1	MA0484.1	gagaagggactggaCtttggatatattat	0.764304	0.915399	8.49853	10.1479	0.00169052	3.64436e-05	1	1.64938	0.148976	strong
chr3	101099191	101099191	1	-	rs2049107	G	A	SNV	c(-10, 5)	Hnf4a	jaspar2018	MA0114.3	MA0114.3	ttaactttggactttGataggtctatcaagt	0.804176	0.716729	16.1199	14.3793	3.92487e-05	0.000468662	1	-1.74058	-0.0869524	strong
chr3	101099191	101099191	1	+	rs2049107	G	A	SNV	c(-9, 5)	HNF4A	jaspar2018	MA0114.2	MA0114.2	taactttggactttGataggtctatcaag	0.910482	0.78467	10.5878	9.14932	3.15737e-05	0.000908661	1	-1.43845	-0.123884	strong
chr3	101099191	101099191	1	-	rs2049107	G	A	SNV	c(-8, 6)	HNF4G	jaspar2018	MA0484.1	MA0484.1	taactttggactttGataggtctatcaag	0.901425	0.771961	9.99537	8.58211	5.54062e-05	0.00143511	1	-1.41326	-0.127649	strong
chr10	75670527	75670527	1	+	rs549463604	G	C	SNV	c(-12, 1)	PLAG1	jaspar2018	MA0163.1	MA0163.1	tggggcccagcggGgagaagttgcaga	0.933108	0.855475	13.1724	12.096	4.88013e-07	1.48788e-05	1	-1.07635	-0.0763382	strong
chr10	75670527	75670527	1	+	rs549463604	G	C	SNV	c(-10, 2)	TFAP2A(var.3)	jaspar2018	MA0872.1	MA0872.1	ggggcccagcggGgagaagttgcag	0.915269	0.751103	11.2982	9.30488	4.4778e-05	0.00287201	1	-1.99333	-0.161704	strong
chr10	75670527	75670527	1	-	rs549463604	G	C	SNV	c(-10, 2)	TFAP2B(var.3)	jaspar2018	MA0813.1	MA0813.1	ggggcccagcggGgagaagttgcag	0.908209	0.755069	11.3769	9.47757	7.14213e-05	0.00265446	1	-1.89929	-0.151757	strong
chr10	75670527	75670527	1	-	rs549463604	G	C	SNV	c(-10, 2)	TFAP2C(var.3)	jaspar2018	MA0815.1	MA0815.1	ggggcccagcggGgagaagttgcag	0.908229	0.749505	11.5384	9.54259	5.4583e-05	0.00264429	1	-1.99576	-0.157243	strong
chr10	75670527	75670527	1	-	rs549463604	G	C	SNV	c(-8, 5)	ZIC1	jaspar2018	MA0696.1	MA0696.1	tggggcccagcggGgagaagttgcaga	0.843709	0.723423	14.0898	12.0963	2.44007e-05	0.000768062	1	-1.99351	-0.119515	strong
chr10	75670527	75670527	1	-	rs549463604	G	C	SNV	c(-9, 5)	ZIC3	jaspar2018	MA0697.1	MA0697.1	ttggggcccagcggGgagaagttgcagaa	0.858398	0.724521	12.7645	10.7999	2.45506e-05	0.00106633	1	-1.96457	-0.132362	strong
chr10	75670527	75670527	1	-	rs549463604	G	C	SNV	c(-9, 5)	ZIC4	jaspar2018	MA0751.1	MA0751.1	ttggggcccagcggGgagaagttgcagaa	0.870196	0.732208	9.71167	8.20673	6.11776e-05	0.00239064	1	-1.50493	-0.135247	strong
chr10	75692300	75692300	1	-	rs553263063	C	T	SNV	c(-14, -1)	Sox11	jaspar2018	MA0869.1	MA0869.1	agcattgaagttctTttcccctcattggg	0.664378	0.739773	17.5352	19.5206	0.00075889	8.97124e-05	1	1.98543	0.0752819	strong
chr10	75692300	75692300	1	-	rs553263063	C	T	SNV	c(-3, 11)	Spi1	jaspar2018	MA0080.3	MA0080.3	agcattgaagttctCttcccctcattggg	0.87026	0.803087	10.4337	9.64325	9.94429e-05	0.000798149	1	-0.790451	-0.066089	strong
chr12	68383624	68383624	1	+	rs55853686	C	T	SNV	c(-11, 1)	HSF2	jaspar2018	MA0770.1	MA0770.1	tttcaggaagctTacaaacccttcc	0.760518	0.85578	12.0583	13.5525	0.000463903	3.52114e-05	1	1.49427	0.0944859	strong
chr3	188108642	188108642	1	+	rs56046601	G	C	SNV	c(-3, 7)	KLF4	jaspar2018	MA0039.3	MA0039.3	agaagagagaCaccctgaaga	0.78189	0.961735	7.8466	9.60419	0.00289083	5.43594e-05	1	1.75759	0.176144	strong
chr19	1103809	1103809	1	+	rs562612528	G	A	SNV	c(-2, 8)	NRF1	jaspar2018	MA0506.1	MA0506.1	acacaagcgaGcatgcgcagt	0.916491	0.81297	11.6391	10.3262	2.38419e-05	0.000397205	1	-1.31295	-0.103396	strong
chr19	1104527	1104527	1	+	rs566928862	C	G	SNV	c(-5, 8)	PLAG1	jaspar2018	MA0163.1	MA0163.1	ggcgtctccgggcCgagcggggctgct	0.805417	0.750124	11.402	10.6354	8.04365e-05	0.000390682	1	-0.766621	-0.0543711	strong
chr2	135070118	135070118	1	-	rs59902004	A	G	SNV	c(-8, 6)	Sox11	jaspar2018	MA0869.1	MA0869.1	catttcttcattgcAtttgttccttccgt	0.75549	0.681723	19.9345	17.9919	5.25368e-05	0.000462584	1	-1.94255	-0.0736559	strong
chr2	135070118	135070118	1	-	rs59902004	A	G	SNV	c(-8, 7)	SOX4	jaspar2018	MA0867.1	MA0867.1	ccatttcttcattgcAtttgttccttccgtt	0.72532	0.658768	19.7872	17.9783	4.98183e-05	0.000360959	1	-1.80896	-0.0663756	strong
chr3	72394852	72394852	1	+	rs61192126	T	C	SNV	c(-7, 4)	SP8	jaspar2018	MA0747.1	MA0747.1	gcctgacactcCccatccccaca	0.806685	0.893123	7.84247	8.66636	0.000782907	7.9155e-05	1	0.823887	0.0850678	strong
chr8	129607163	129607163	1	+	rs2083770	T	C	SNV	c(-6, 4)	SOX13	jaspar2018	MA1120.1	MA1120.1	catgagacaaTgaacctcagt	0.981463	0.819156	9.14918	7.66159	7.96318e-05	0.00216961	1	-1.48759	-0.159628	strong
chr8	129607163	129607163	1	-	rs2083770	T	C	SNV	c(-5, 3)	Sox17	jaspar2018	MA0078.1	MA0078.1	tgagacaaTgaacctca	1	0.8199	8.59409	7.06485	0	0.00177002	1	-1.52924	-0.177941	strong
chr8	129607163	129607163	1	-	rs2083770	T	C	SNV	c(-7, 2)	Sox6	jaspar2018	MA0515.1	MA0515.1	atgagacaaTgaacctcag	0.974389	0.914218	10.9053	10.2344	2.38419e-05	0.000328064	1	-0.670871	-0.0599484	weak
chr11	118754353	118754353	1	+	rs630923	C	A	SNV	c(-9, 5)	MEF2C	jaspar2018	MA0497.1	MA0497.1	gggcagcctttaaaAtagtcataggcccc	0.764767	0.912085	9.04837	10.7632	0.00167435	4.36539e-05	1	1.71481	0.145489	strong
chr12	123528405	123528405	1	-	rs655293	G	A	SNV	c(-8, -1)	POU3F4	jaspar2018	MA0789.1	MA0789.1	atcagcatAgcaacctc	0.798902	0.895211	9.72083	10.8802	0.000835419	9.15527e-05	1	1.15937	0.0954871	strong
chr12	123528405	123528405	1	+	rs655293	G	A	SNV	c(-8, 5)	Rfx1	jaspar2018	MA0509.1	MA0509.1	tggctatcagcatGgcaacctcagttg	0.897278	0.858271	11.5804	11.0856	9.26107e-06	4.11645e-05	1	-0.494738	-0.0384017	weak
chr12	123528405	123528405	1	+	rs655293	G	A	SNV	c(-8, 10)	RFX2	jaspar2018	MA0600.1	MA0600.1	ggctgtggctatcagcatGgcaacctcagttgggtgg	0.879518	0.834659	11.9912	11.3912	7.09799e-06	3.91405e-05	1	-0.600034	-0.0441111	weak
chr12	123528405	123528405	1	-	rs655293	G	A	SNV	c(-9, 6)	RFX2	jaspar2018	MA0600.2	MA0600.2	tgtggctatcagcatGgcaacctcagttggg	0.781218	0.741945	14.134	13.4276	9.75421e-05	0.000302368	1	-0.706383	-0.0390934	strong
chr2	102977537	102977537	1	-	rs6710885	A	G	SNV	c(-10, 4)	Bach1::Mafk	jaspar2018	MA0591.1	MA0591.1	cagtttgctgagccAtctcctgataactt	0.879656	0.774659	14.208	12.5317	1.58651e-05	0.000302061	1	-1.67635	-0.103931	strong
chr2	102977537	102977537	1	-	rs6710885	A	G	SNV	c(-11, 2)	BACH2	jaspar2018	MA1101.1	MA1101.1	agtttgctgagccAtctcctgataact	0.867029	0.729989	11.3997	9.63975	5.541e-05	0.00149121	1	-1.75998	-0.134273	strong
chr2	102977537	102977537	1	-	rs6710885	A	G	SNV	c(-13, 1)	MAF::NFE2	jaspar2018	MA0501.1	MA0501.1	cagtttgctgagccAtctcctgataactt	0.858687	0.731387	13.5749	11.586	2.70586e-05	0.000889582	1	-1.98887	-0.126016	strong
chr2	102977537	102977537	1	+	rs6710885	A	G	SNV	c(-13, 7)	MAFF	jaspar2018	MA0495.2	MA0495.2	acttgtcagtttgctgagccAtctcctgataactttgtctc	0.775576	0.670661	10.3241	9.01249	6.08826e-05	0.00121188	1	-1.31162	-0.0998965	strong
chr2	102977537	102977537	1	+	rs6710885	A	G	SNV	c(-12, 6)	MAFK	jaspar2018	MA0496.2	MA0496.2	ttgtcagtttgctgagccAtctcctgataactttgtc	0.770452	0.681195	10.6684	9.48897	8.08256e-05	0.00101849	1	-1.17945	-0.0860808	strong
chr2	102977537	102977537	1	-	rs6710885	A	G	SNV	c(-9, 5)	Nfe2l2	jaspar2018	MA0150.2	MA0150.2	cagtttgctgagccAtctcctgataactt	0.840929	0.696384	11.8122	9.82827	9.40049e-05	0.00285254	1	-1.98391	-0.141754	strong
chr6	90662400	90662400	1	-	rs6939786	C	T	SNV	c(-4, 5)	Stat3	jaspar2018	MA0144.1	MA0144.1	ctttttttcCtggtaaatc	0.917503	0.765208	11.1792	9.34458	3.05176e-05	0.00130749	1	-1.83463	-0.150713	strong
chr22	21984205	21984205	1	-	rs710177	A	G	SNV	c(-8, 3)	PAX5	jaspar2018	MA0014.3	MA0014.3	acgctggtcacGgccccggccag	0.759892	0.88707	7.3498	8.54238	0.00189108	0.000102222	1	1.19258	0.12421	strong
chr19	1192769	1192769	1	-	rs7252565	G	A	SNV	c(-5, 9)	MEF2A	jaspar2018	MA0052.2	MA0052.2	catggttaactgctAtttttgtcaagatg	0.75777	0.911234	9.75347	11.6999	0.00124849	1.67759e-05	1	1.94645	0.151761	strong
chr19	1192769	1192769	1	-	rs7252565	G	A	SNV	c(-4, 10)	MEF2C	jaspar2018	MA0497.1	MA0497.1	catggttaactgctAtttttgtcaagatg	0.836189	0.965798	9.87973	11.3884	0.000406072	2.69804e-06	1	1.50868	0.128	strong
chr19	1192769	1192769	1	+	rs7252565	G	A	SNV	c(-7, 2)	MSC	jaspar2018	MA0665.1	MA0665.1	ttaactgctGtttttgtca	0.852537	0.738252	11.0609	9.58778	9.63211e-05	0.00156307	1	-1.47313	-0.113653	strong
chr19	1192769	1192769	1	+	rs7252565	G	A	SNV	c(-9, 4)	Tcf21	jaspar2018	MA0832.1	MA0832.1	atggttaactgctGtttttgtcaagat	0.876118	0.758633	14.6341	12.6854	2.49222e-05	0.000536051	1	-1.94864	-0.116763	strong
chr10	82225376	82225376	1	-	rs72819577	C	A	SNV	c(-7, 3)	T	jaspar2018	MA0009.1	MA0009.1	atagtgacacCtacagtggga	0.915343	0.798	14.1495	12.3551	8.82149e-06	0.000267744	1	-1.7944	-0.116187	strong
chr10	82225376	82225376	1	-	rs72819577	C	A	SNV	c(-6, 1)	TBX1	jaspar2018	MA0805.1	MA0805.1	gtgacacCtacagtg	0.916089	0.853629	11.1107	10.359	7.62939e-05	0.000350952	1	-0.751698	-0.0620184	strong
chr10	82225376	82225376	1	-	rs72819577	C	A	SNV	c(-6, 1)	TBX15	jaspar2018	MA0803.1	MA0803.1	gtgacacCtacagtg	0.910445	0.791809	11.5326	10.0387	3.05176e-05	0.000732422	1	-1.49386	-0.117996	strong
chr10	82225376	82225376	1	-	rs72819577	C	A	SNV	c(-8, 2)	TBX20	jaspar2018	MA0689.1	MA0689.1	atagtgacacCtacagtggga	0.876734	0.803639	10.8287	9.9391	9.77516e-05	0.000597239	1	-0.889564	-0.0721532	strong
chr10	82225376	82225376	1	-	rs72819577	C	A	SNV	c(-6, 1)	TBX4	jaspar2018	MA0806.1	MA0806.1	gtgacacCtacagtg	0.980972	0.91792	8.59339	8.04889	3.05176e-05	0.000213623	1	-0.544495	-0.0621733	weak
chr10	82225376	82225376	1	-	rs72819577	C	A	SNV	c(-6, 1)	TBX5	jaspar2018	MA0807.1	MA0807.1	gtgacacCtacagtg	0.981197	0.89616	7.08753	6.48982	3.05176e-05	0.000717163	1	-0.597713	-0.0827892	weak
chr2	231133578	231133578	1	-	rs72988290	C	T	SNV	c(-3, 10)	E2F7	jaspar2018	MA0758.1	MA0758.1	ttcaagataatctTggcaggaactcca	0.695919	0.778942	16.2278	18.1584	0.000439581	4.13284e-05	1	1.9306	0.0828626	strong
chr2	231133578	231133578	1	+	rs72988290	C	T	SNV	c(-4, 6)	NFIC	jaspar2018	MA0161.2	MA0161.2	aagataatctTggcaggaact	0.858326	0.999481	8.39014	9.73977	0.000540972	2.21729e-05	1	1.34964	0.138499	strong
chr2	43361256	43361256	1	+	rs2163226	T	C	SNV	c(-7, 7)	IRF4	jaspar2018	MA1419.1	MA1419.1	ctaagggctgaatgCgaaaccctcccgca	0.705065	0.76676	15.5093	16.8603	0.000475015	8.44467e-05	1	1.351	0.0614994	strong
chr2	43361256	43361256	1	+	rs2163226	T	C	SNV	c(-7, 6)	IRF8	jaspar2018	MA0652.1	MA0652.1	taagggctgaatgCgaaaccctcccgc	0.734901	0.775552	15.6906	16.5573	0.000242636	7.68751e-05	1	0.866703	0.0406089	strong
chr10	112215562	112215562	1	-	rs735324	A	T	SNV	c(-7, 5)	ATF4	jaspar2018	MA0833.1	MA0833.1	aggaatcttgccTcagtggtagagt	0.765863	0.89007	10.646	12.3571	0.00130397	7.16448e-05	1	1.7111	0.123354	strong
chr1	172807254	172807254	1	-	rs7519046	G	A	SNV	c(1, 13)	IRF7	jaspar2018	MA0772.1	MA0772.1	catttgagaaagcAttttcccttttct	0.827956	0.853606	13.2516	13.6571	0.000107639	5.1599e-05	1	0.405489	0.0253885	weak
chr1	172807254	172807254	1	-	rs7519046	G	A	SNV	c(-2, 12)	PRDM1	jaspar2018	MA0508.1	MA0508.1	tcatttgagaaagcAttttcccttttctg	0.831925	0.876937	11.0186	11.6013	0.000127136	3.51937e-05	1	0.582688	0.0441619	weak
chr6	446540	446540	1	+	rs7740707	A	C	SNV	c(-8, 9)	MAFF	jaspar2018	MA0495.1	MA0495.1	ctggagcagcagaactcAgcagtgcaaggcggctg	0.919072	0.750483	10.7215	8.8046	9.87628e-05	0.00349084	1	-1.91692	-0.16466	strong
chr6	446540	446540	1	+	rs7740707	A	C	SNV	c(-7, 7)	MAFK	jaspar2018	MA0496.1	MA0496.1	gagcagcagaactcAgcagtgcaaggcgg	0.943963	0.776701	11.442	9.44226	9.51532e-05	0.00328656	1	-1.99973	-0.165104	strong
chr6	446540	446540	1	+	rs7740707	A	C	SNV	c(-6, 12)	PAX5	jaspar2018	MA0014.2	MA0014.2	cctggagcagcagaactcAgcagtgcaaggcggctgc	0.826814	0.716084	7.733	6.7276	3.60227e-05	0.00134687	1	-1.0054	-0.108044	strong
chr12	68425985	68425985	1	+	rs77928745	C	T	SNV	c(-5, 4)	EMX2	jaspar2018	MA0886.1	MA0886.1	tgataataaTtagagtcag	0.885054	0.996887	8.37075	9.41989	0.00154305	5.34058e-05	1	1.04914	0.111031	strong
chr12	68425985	68425985	1	-	rs77928745	C	T	SNV	c(-9, 5)	HNF1A	jaspar2018	MA0046.2	MA0046.2	aatcctgataataaTtagagtcaggagta	0.720503	0.827495	10.096	11.5712	0.00114605	7.09044e-05	1	1.47523	0.105753	strong
chr12	68425985	68425985	1	+	rs77928745	C	T	SNV	c(-8, 4)	HNF1B	jaspar2018	MA0153.2	MA0153.2	tcctgataataaTtagagtcaggag	0.738289	0.825331	10.7453	11.9932	0.000659943	6.54757e-05	1	1.24794	0.0860794	strong
chr12	68425985	68425985	1	+	rs77928745	C	T	SNV	c(-4, 3)	LBX1	jaspar2018	MA0618.1	MA0618.1	ataataaTtagagtc	0.93155	0.994399	8.25896	8.81237	0.000198364	1.52588e-05	1	0.55341	0.0624497	weak
chr12	68425985	68425985	1	-	rs77928745	C	T	SNV	c(-5, 4)	LHX2	jaspar2018	MA0700.1	MA0700.1	tgataataaTtagagtcag	0.815497	0.993491	7.47891	9.0902	0.00253868	5.62668e-05	1	1.61129	0.176114	strong
chr12	68425985	68425985	1	+	rs77928745	C	T	SNV	c(-4, 3)	Lhx4	jaspar2018	MA0704.1	MA0704.1	ataataaTtagagtc	0.909918	0.990884	6.56268	7.13737	0.00120544	0.000106812	1	0.574691	0.0797951	weak
chr12	68425985	68425985	1	+	rs77928745	C	T	SNV	c(-5, 4)	LHX6	jaspar2018	MA0658.1	MA0658.1	tgataataaTtagagtcag	0.856309	0.982879	8.36015	9.58438	0.00105858	4.57764e-05	1	1.22424	0.125563	strong
chr12	68425985	68425985	1	-	rs77928745	C	T	SNV	c(-4, 3)	Lhx8	jaspar2018	MA0705.1	MA0705.1	ataataaTtagagtc	0.880242	0.991332	6.49132	7.30557	0.00209045	4.57764e-05	1	0.814248	0.110495	strong
chr12	68425985	68425985	1	-	rs77928745	C	T	SNV	c(-5, 4)	MEOX1	jaspar2018	MA0661.1	MA0661.1	tgataataaTtagagtcag	0.907332	0.993837	7.58815	8.30278	0.000519753	5.81741e-05	1	0.714635	0.0855472	strong
chr12	68425985	68425985	1	+	rs77928745	C	T	SNV	c(-5, 4)	MNX1	jaspar2018	MA0707.1	MA0707.1	tgataataaTtagagtcag	0.915255	0.986227	6.68271	7.19432	0.000761986	6.29425e-05	1	0.511612	0.0701452	weak
chr12	68425985	68425985	1	-	rs77928745	C	T	SNV	c(-5, 4)	NOTO	jaspar2018	MA0710.1	MA0710.1	tgataataaTtagagtcag	0.855115	0.995398	7.16322	8.32755	0.00277519	5.91278e-05	1	1.16433	0.139178	strong
chr12	68425985	68425985	1	-	rs77928745	C	T	SNV	c(-4, 3)	PAX4	jaspar2018	MA0068.2	MA0068.2	ataataaTtagagtc	0.80877	0.979933	6.8397	8.25487	0.00492859	4.57764e-05	1	1.41517	0.168057	strong
chr12	68425985	68425985	1	+	rs77928745	C	T	SNV	c(-5, 4)	POU6F1	jaspar2018	MA0628.1	MA0628.1	tgataataaTtagagtcag	0.841647	0.984849	7.61484	8.88021	0.000858307	8.7738e-05	1	1.26538	0.140378	strong
chr12	68425985	68425985	1	-	rs77928745	C	T	SNV	c(-4, 3)	VAX2	jaspar2018	MA0723.1	MA0723.1	ataataaTtagagtc	0.905196	0.997697	5.4044	5.94268	0.000762939	1.52588e-05	1	0.538277	0.0903744	weak
chr12	68425985	68425985	1	-	rs77928745	C	T	SNV	c(-4, 3)	VSX1	jaspar2018	MA0725.1	MA0725.1	ataataaTtagagtc	0.82529	1	5.75003	6.92643	0.00350952	0	1	1.1764	0.169842	strong
chr12	68425985	68425985	1	-	rs77928745	C	T	SNV	c(-4, 3)	VSX2	jaspar2018	MA0726.1	MA0726.1	ataataaTtagagtc	0.795252	0.999872	6.49526	8.12619	0.00320435	1.52588e-05	1	1.63093	0.200676	strong
chr4	123429138	123429138	1	-	rs79212788	C	A	SNV	c(-9, 4)	Arid5a	jaspar2018	MA0602.1	MA0602.1	actcaaaaacaatAttttttcctggta	0.794094	0.960745	6.86222	8.25267	0.00259034	0.000102419	1	1.39045	0.162054	strong
chr4	123429138	123429138	1	+	rs79212788	C	A	SNV	c(-11, 2)	ONECUT3	jaspar2018	MA0757.1	MA0757.1	actcaaaaacaatAttttttcctggta	0.767638	0.850106	11.8811	13.1368	0.000572756	6.68615e-05	1	1.25572	0.0814389	strong
chr12	68436166	68436166	1	-	rs7980829	G	T	SNV	c(-11, 2)	GLIS3	jaspar2018	MA0737.1	MA0737.1	ggtgtagttggggGtaggtatagagga	0.77626	0.677213	15.0242	13.113	9.02899e-05	0.00125453	1	-1.91119	-0.0988135	strong
chr6	44232920	44232920	1	+	rs2233434	A	G	SNV	c(-8, 5)	Bcl6	jaspar2018	MA0463.1	MA0463.1	ctgtggttccttgAcgggtcccggagg	0.91283	0.754216	10.6465	8.83582	3.18624e-05	0.0014707	1	-1.81071	-0.155537	strong
chr19	1131277	1131277	1	-	rs80309689	G	A	SNV	c(-5, 3)	THAP1	jaspar2018	MA0597.1	MA0597.1	tagtgaggGcaagcacc	0.988731	0.733051	5.0227	3.75627	6.86646e-05	0.0379181	1	-1.26644	-0.249371	strong
chr12	6486656	6486656	1	+	rs879605	T	C	SNV	c(-4, 7)	EHF	jaspar2018	MA0598.2	MA0598.2	tcaggtgcaccCggatgtgaaag	0.768393	0.858265	10.3016	11.4838	0.000901461	9.43542e-05	1	1.18222	0.0885675	strong
chr12	6486656	6486656	1	+	rs879605	T	C	SNV	c(-4, 7)	ELF1	jaspar2018	MA0473.2	MA0473.2	tcaggtgcaccCggatgtgaaag	0.74915	0.86556	11.2818	13.0146	0.000957489	5.73397e-05	1	1.73279	0.115398	strong
chr12	6486656	6486656	1	+	rs879605	T	C	SNV	c(-4, 8)	ELF3	jaspar2018	MA0640.1	MA0640.1	ctcaggtgcaccCggatgtgaaagc	0.777521	0.867817	12.4183	13.848	0.000355691	2.94149e-05	1	1.42964	0.0896845	strong
chr12	6486656	6486656	1	+	rs879605	T	C	SNV	c(-4, 7)	ELF4	jaspar2018	MA0641.1	MA0641.1	tcaggtgcaccCggatgtgaaag	0.761027	0.866302	11.4078	12.967	0.000723183	5.04851e-05	1	1.55919	0.104313	strong
chr12	6486656	6486656	1	+	rs879605	T	C	SNV	c(-2, 7)	ETV3	jaspar2018	MA0763.1	MA0763.1	aggtgcaccCggatgtgaa	0.769884	0.896812	7.58908	8.81948	0.00159168	6.48499e-05	1	1.2304	0.125298	strong
chr12	6486656	6486656	1	+	rs879605	T	C	SNV	c(-2, 7)	ETV5	jaspar2018	MA0765.1	MA0765.1	aggtgcaccCggatgtgaa	0.81208	0.97436	6.71115	8.02483	0.00430489	7.24792e-05	1	1.31368	0.159574	strong
chr12	6486656	6486656	1	-	rs879605	T	C	SNV	c(-5, 5)	GCM1	jaspar2018	MA0646.1	MA0646.1	caggtgcaccCggatgtgaaa	0.808321	0.890927	9.29155	10.2272	0.000742912	8.15392e-05	1	0.935699	0.0816296	strong
chr12	6486656	6486656	1	+	rs879605	T	C	SNV	c(-6, 3)	ID4	jaspar2018	MA0824.1	MA0824.1	aggtgcaccTggatgtgaa	0.988387	0.832796	10.4967	8.85345	8.67844e-05	0.00179482	1	-1.64321	-0.154738	strong
chr12	6486656	6486656	1	+	rs879605	T	C	SNV	c(-3, 7)	SPDEF	jaspar2018	MA0686.1	MA0686.1	caggtgcaccCggatgtgaaa	0.873539	0.998634	11.4281	13.056	0.000134945	2.38419e-07	1	1.62788	0.124515	strong
chr12	6486656	6486656	1	+	rs879605	T	C	SNV	c(-6, 3)	TCF3	jaspar2018	MA0522.2	MA0522.2	aggtgcaccTggatgtgaa	0.992854	0.81709	10.6008	8.73075	8.58307e-05	0.00205231	1	-1.87005	-0.175151	strong
chr12	6486656	6486656	1	+	rs879605	T	C	SNV	c(-6, 3)	TCF4	jaspar2018	MA0830.1	MA0830.1	aggtgcaccTggatgtgaa	0.996677	0.822181	11.0973	9.15987	2.00272e-05	0.00146675	1	-1.93747	-0.17401	strong
chr6	32632885	32632885	1	+	rs9274412	G	T	SNV	c(-5, 6)	HINFP	jaspar2018	MA0131.2	MA0131.2	gccccagcccgTccgcccccgca	0.781948	0.954102	9.09223	11.0726	0.00183582	4.73857e-05	1	1.98035	0.170712	strong
chr17	76165104	76165104	1	-	rs9908045	G	A	SNV	c(-9, 4)	EGR1	jaspar2018	MA0162.2	MA0162.2	ggagtttgggggcGgctcccggacagg	0.882501	0.75518	10.4085	8.92179	9.2417e-05	0.00196645	1	-1.48672	-0.126202	strong
chr5	55438851	55438851	1	-	rs10065637	C	T	SNV	c(-4, 3)	Dux	jaspar2018	MA0611.1	MA0611.1	atgctgaTtgaaacc	0.817181	0.992448	9.28608	11.274	0.00280762	0.00012207	1	1.98797	0.175001	strong
chr5	55438851	55438851	1	+	rs10065637	C	T	SNV	c(-10, 1)	Mafb	jaspar2018	MA0117.2	MA0117.2	ggaaatgctgaCtgaaaccacag	0.984032	0.941205	9.60876	9.1984	2.98023e-06	6.77109e-05	1	-0.410362	-0.0420377	weak
chr2	234160669	234160669	1	-	rs10199278	C	G	SNV	c(-5, 8)	Zfx	jaspar2018	MA0146.2	MA0146.2	gggaacctgaggcCgagtccctggcgc	0.953291	0.811893	10.9914	9.38632	8.8267e-05	0.00121652	1	-1.6051	-0.139312	strong
chr2	234160669	234160669	1	-	rs10199278	C	G	SNV	c(-5, 8)	Zfx	jaspar2018	MA0146.1	MA0146.1	gggaacctgaggcCgagtccctggcgc	0.953123	0.813422	10.9396	9.36115	8.75518e-05	0.00118784	1	-1.57847	-0.137626	strong
chr19	1030766	1030766	1	+	rs10419072	G	A	SNV	c(-8, 2)	E2F1	jaspar2018	MA0024.2	MA0024.2	gcagggcgggAaggcagatcc	0.816021	0.996252	9.01008	10.9987	0.00239944	1.43051e-06	1	1.98858	0.180124	strong
chr19	1030766	1030766	1	-	rs10419072	G	A	SNV	c(-13, 1)	E2F3	jaspar2018	MA0469.1	MA0469.1	gaaggcagggcgggAaggcagatccggcc	0.8178	0.974229	10.5844	12.5793	0.0008033	5.52647e-06	1	1.99488	0.154546	strong
chr19	1030766	1030766	1	+	rs10419072	G	A	SNV	c(-7, 3)	E2F4	jaspar2018	MA0470.1	MA0470.1	gcagggcgggAaggcagatcc	0.864244	1	10.31	11.9227	0.000389814	0	1	1.61276	0.135268	strong
chr19	1030766	1030766	1	+	rs10419072	G	A	SNV	c(-7, 3)	E2F6	jaspar2018	MA0471.1	MA0471.1	gcagggcgggAaggcagatcc	0.832596	1	9.96197	11.9572	0.000974178	0	1	1.99523	0.166865	strong
chr19	1030766	1030766	1	+	rs10419072	G	A	SNV	c(-10, 7)	EWSR1-FLI1	jaspar2018	MA0149.1	MA0149.1	tgagaaggcagggcgggAaggcagatccggccagg	0.636281	0.683468	19.6788	21.1306	0.000273146	5.89816e-05	1	1.4518	0.0470307	strong
chr19	1030766	1030766	1	+	rs10419072	G	A	SNV	c(-8, 1)	Klf4	jaspar2018	MA0039.2	MA0039.2	cagggcgggGaggcagatc	0.959671	0.860734	10.5688	9.49218	5.81741e-05	0.000495911	1	-1.07665	-0.0978091	strong
chr19	1030766	1030766	1	-	rs10419072	G	A	SNV	c(-8, 1)	KLF5	jaspar2018	MA0599.1	MA0599.1	cagggcgggGaggcagatc	0.985478	0.890414	11.3151	10.2269	1.43051e-05	0.000268936	1	-1.08822	-0.0947813	strong
chr19	1030766	1030766	1	-	rs10419072	G	A	SNV	c(-9, 1)	SP1	jaspar2018	MA0079.3	MA0079.3	gcagggcgggGaggcagatcc	0.931952	0.893606	10.8778	10.4325	3.93391e-05	0.000181675	1	-0.445284	-0.0381629	weak
chr19	1030766	1030766	1	+	rs10419072	G	A	SNV	c(-7, 3)	TFDP1	jaspar2018	MA1122.1	MA1122.1	gcagggcgggAaggcagatcc	0.865944	1	8.73909	10.0633	0.000244141	0	1	1.32423	0.13159	strong
chr5	35877841	35877841	1	+	rs10491435	G	A	SNV	c(-4, 6)	ELF5	jaspar2018	MA0136.2	MA0136.2	gaagatatacGgaagagacgt	0.954749	0.738085	8.59959	6.67997	8.15392e-05	0.00909519	1	-1.91962	-0.213279	strong
chr2	234149702	234149702	1	+	rs10929322	C	T	SNV	c(-7, 1)	Sox17	jaspar2018	MA0078.1	MA0078.1	gcttattgTcttttaga	0.822958	0.983355	7.09082	8.45276	0.00157166	0.00012207	1	1.36194	0.158474	strong
chr19	49291510	49291510	1	+	rs111811478	A	G	SNV	c(-8, 4)	EOMES	jaspar2018	MA0800.1	MA0800.1	atcacaggtgtgAgccactgcgccc	0.961302	0.792412	10.5651	8.74463	1.51545e-05	0.00132273	1	-1.82051	-0.165768	strong
chr19	49291510	49291510	1	+	rs111811478	A	G	SNV	c(-7, -1)	MGA	jaspar2018	MA0801.1	MA0801.1	aggtgtgAgccactg	1	0.835533	9.74698	8.15974	0	0.000915527	1	-1.58724	-0.162844	strong
chr19	49291510	49291510	1	+	rs111811478	A	G	SNV	c(-11, -1)	PKNOX1	jaspar2018	MA0782.1	MA0782.1	tcacaggtgtgAgccactgcgcc	0.814474	0.735078	16.9024	15.2566	6.41346e-05	0.000357568	1	-1.64578	-0.0793221	strong
chr19	49291510	49291510	1	+	rs111811478	A	G	SNV	c(-11, -1)	PKNOX2	jaspar2018	MA0783.1	MA0783.1	tcacaggtgtgAgccactgcgcc	0.816536	0.732262	16.6934	14.9727	4.04119e-05	0.000358999	1	-1.7207	-0.0841858	strong
chr19	49291510	49291510	1	-	rs111811478	A	G	SNV	c(-7, 5)	SMAD2::SMAD3::SMAD4	jaspar2018	MA0513.1	MA0513.1	atcacaggtgtgAgccactgcgccc	0.921896	0.753905	11.0904	9.10367	3.19928e-05	0.0024858	1	-1.98674	-0.165368	strong
chr19	49291510	49291510	1	+	rs111811478	A	G	SNV	c(-7, 2)	TBR1	jaspar2018	MA0802.1	MA0802.1	acaggtgtgAgccactgcg	0.937783	0.781136	10.5065	8.77922	3.05176e-05	0.00146008	1	-1.72729	-0.154325	strong
chr19	49291510	49291510	1	+	rs111811478	A	G	SNV	c(-7, -1)	TBX1	jaspar2018	MA0805.1	MA0805.1	aggtgtgAgccactg	1	0.838437	12.1206	10.1762	0	0.000534058	1	-1.94438	-0.16042	strong
chr19	49291510	49291510	1	+	rs111811478	A	G	SNV	c(-7, -1)	TBX15	jaspar2018	MA0803.1	MA0803.1	aggtgtgAgccactg	1	0.875475	12.6602	11.0922	0	0.000213623	1	-1.56802	-0.123854	strong
chr19	49291510	49291510	1	+	rs111811478	A	G	SNV	c(-8, 2)	TBX2	jaspar2018	MA0688.1	MA0688.1	cacaggtgtgAgccactgcgc	0.968355	0.815385	8.56297	7.23901	2.6226e-05	0.00207067	1	-1.32396	-0.149823	strong
chr19	49291510	49291510	1	+	rs111811478	A	G	SNV	c(-8, 2)	TBX20	jaspar2018	MA0689.1	MA0689.1	cacaggtgtgAgccactgcgc	0.931939	0.792372	11.5005	9.80198	1.5974e-05	0.000794649	1	-1.69853	-0.137769	strong
chr19	49291510	49291510	1	+	rs111811478	A	G	SNV	c(-8, 1)	TBX21	jaspar2018	MA0690.1	MA0690.1	acaggtgtgAgccactgcg	0.9521	0.797413	11.7923	9.89828	1.43051e-05	0.000891685	1	-1.89399	-0.153003	strong
chr19	49291510	49291510	1	+	rs111811478	A	G	SNV	c(-7, -1)	TBX4	jaspar2018	MA0806.1	MA0806.1	aggtgtgAgccactg	1	0.895234	8.75771	7.85298	0	0.000396729	1	-0.904729	-0.103307	strong
chr19	49291510	49291510	1	+	rs111811478	A	G	SNV	c(-7, -1)	TBX5	jaspar2018	MA0807.1	MA0807.1	aggtgtgAgccactg	1	0.937213	7.21969	6.77837	0	7.62939e-05	1	-0.441317	-0.0611268	weak
chr19	49291510	49291510	1	+	rs111811478	A	G	SNV	c(-11, -1)	TGIF1	jaspar2018	MA0796.1	MA0796.1	tcacaggtgtgAgccactgcgcc	0.79092	0.704424	17.2732	15.3856	7.01547e-05	0.000645101	1	-1.88769	-0.0864477	strong
chr10	75625027	75625027	1	-	rs116345065	C	T	SNV	c(-10, 8)	CTCF	jaspar2018	MA0139.1	MA0139.1	tgttttggcggggcccacTtgtgtctacagtctgcag	0.728225	0.830899	10.09	11.4754	0.00141181	8.42352e-05	1	1.38544	0.100706	strong
chr10	75625027	75625027	1	+	rs116345065	C	T	SNV	c(-5, 4)	FIGLA	jaspar2018	MA0820.1	MA0820.1	ggggcccacCtgtgtctac	0.98658	0.859232	9.0025	7.85567	4.57764e-05	0.00132179	1	-1.14682	-0.125702	strong
chr10	75625027	75625027	1	+	rs116345065	C	T	SNV	c(-5, 4)	NKX2-3	jaspar2018	MA0672.1	MA0672.1	ggggcccacTtgtgtctac	0.769838	0.972552	7.57848	9.5536	0.00718594	9.44138e-05	1	1.97512	0.201111	strong
chr10	75625027	75625027	1	+	rs116345065	C	T	SNV	c(-6, 2)	ZEB1	jaspar2018	MA0103.2	MA0103.2	gggcccacCtgtgtcta	0.99083	0.832411	12.5257	10.5295	4.95911e-05	0.00117493	1	-1.99622	-0.157914	strong
chr11	60793790	60793790	1	-	rs117624126	G	A	SNV	c(-5, 5)	NFKB1	jaspar2018	MA0105.3	MA0105.3	gtgcaggggaAccccagggaa	0.796302	0.93605	9.87125	11.59	0.00146675	7.93934e-05	1	1.71877	0.138873	strong
chr11	60793790	60793790	1	+	rs117624126	G	A	SNV	c(-6, 6)	NFKB1	jaspar2018	MA0105.4	MA0105.4	aggtgcaggggaAccccagggaagg	0.795845	0.821348	15.3166	15.8045	0.00010854	4.13656e-05	1	0.487877	0.025381	weak
chr11	60793790	60793790	1	+	rs117624126	G	A	SNV	c(-4, 10)	TFAP2A	jaspar2018	MA0003.2	MA0003.2	ggaggtgcaggggaGccccagggaaggga	0.926045	0.859618	9.90816	9.21419	1.91918e-05	0.000295651	1	-0.693974	-0.0649741	weak
chr11	60793790	60793790	1	-	rs117624126	G	A	SNV	c(-1, 10)	TFAP2A(var.2)	jaspar2018	MA0810.1	MA0810.1	ggtgcaggggaGccccagggaag	0.952022	0.851152	8.33703	7.46484	7.40886e-05	0.00119275	1	-0.872189	-0.0996575	strong
chr11	60793790	60793790	1	-	rs117624126	G	A	SNV	c(-1, 10)	TFAP2B	jaspar2018	MA0811.1	MA0811.1	ggtgcaggggaGccccagggaag	0.931672	0.867641	8.24459	7.68621	9.11355e-05	0.000709593	1	-0.558375	-0.0631615	weak
chr15	91025830	91025830	1	-	rs11853271	G	A	SNV	c(-4, 5)	MYF6	jaspar2018	MA0667.1	MA0667.1	gcaggcacaGttgtttctg	0.93153	0.886174	12.3089	11.7127	1.71661e-05	6.58035e-05	1	-0.596187	-0.0451351	weak
chr15	91025830	91025830	1	+	rs11853271	G	A	SNV	c(-2, 6)	SOX9	jaspar2018	MA0077.1	MA0077.1	caggcacaAttgtttct	0.781522	0.979632	5.7803	7.20248	0.00395584	3.8147e-05	1	1.42218	0.193529	strong
chr15	91025830	91025830	1	-	rs11853271	G	A	SNV	c(1, 8)	SRY	jaspar2018	MA0084.1	MA0084.1	caggcacaAttgtttct	0.915689	0.988989	6.3907	6.89014	0.00116348	4.19617e-05	1	0.499442	0.0717057	weak
chr1	172864652	172864652	1	-	rs12142280	T	A	SNV	c(-12, 1)	SPI1	jaspar2018	MA0080.4	MA0080.4	aaacttgctctatTtgggtgttttctt	0.797912	0.732453	16.2773	14.9483	6.93351e-05	0.000339687	1	-1.32902	-0.065211	strong
chr1	172864652	172864652	1	-	rs12142280	T	A	SNV	c(-9, 6)	SRF	jaspar2018	MA0083.3	MA0083.3	acaaacttgctctatAtgggtgttttctttc	0.709615	0.795595	13.6357	15.2643	0.00086353	8.38516e-05	1	1.62863	0.0851075	strong
chr10	6056294	6056294	1	-	rs12722596	T	C	SNV	c(-6, 3)	ERF	jaspar2018	MA0760.1	MA0760.1	cagcatttcCgttgccaca	0.719266	0.895383	8.11775	10.0825	0.00389671	6.86646e-05	1	1.96478	0.174653	strong
chr10	6056294	6056294	1	-	rs12722596	T	C	SNV	c(-6, 3)	ERG	jaspar2018	MA0474.2	MA0474.2	cagcatttcCgttgccaca	0.724668	0.920887	7.44348	9.43766	0.00743294	8.96454e-05	1	1.99418	0.194712	strong
chr10	6056294	6056294	1	-	rs12722596	T	C	SNV	c(-6, 4)	ETV2	jaspar2018	MA0762.1	MA0762.1	gcagcatttcCgttgccacaa	0.751245	0.902419	9.9837	11.9778	0.0018189	5.00679e-05	1	1.99414	0.150331	strong
chr16	11346008	11346008	1	-	rs12929112	A	C	SNV	c(-17, 3)	ZNF263	jaspar2018	MA0528.1	MA0528.1	aaaccctcctctcacttttcCttcttgtaaattgacgtcag	0.711981	0.825373	8.12796	9.36777	0.000601349	6.42866e-06	1	1.23981	0.10994	strong
chr2	111616104	111616104	1	-	rs13401811	G	A	SNV	c(-11, 6)	TP63	jaspar2018	MA0525.2	MA0525.2	cacctgcaggtgtgtgaAcctgtggtagcagtctg	0.67126	0.748551	14.5774	16.2492	0.000914243	9.91265e-05	1	1.67179	0.0770834	strong
chr19	1027640	1027640	1	-	rs139106846	G	A	SNV	c(-3, 10)	EGR1	jaspar2018	MA0162.2	MA0162.2	cccagggaaagtgGggggcgggggttg	0.899361	0.842756	10.6054	9.94442	4.82872e-05	0.000273336	1	-0.660975	-0.0561073	weak
chr19	1027640	1027640	1	-	rs139106846	G	A	SNV	c(-7, 6)	GLIS2	jaspar2018	MA0736.1	MA0736.1	cccagggaaagtgGggggcgggggttg	0.834689	0.776102	12.4445	11.5777	9.4302e-05	0.000456914	1	-0.866797	-0.0582123	strong
chr19	1027640	1027640	1	-	rs139106846	G	A	SNV	c(-2, 11)	KLF14	jaspar2018	MA0740.1	MA0740.1	cccagggaaagtgGggggcgggggttg	0.865147	0.833863	12.0906	11.6577	7.97436e-05	0.000194512	1	-0.432873	-0.0310158	weak
chr19	1027640	1027640	1	-	rs139106846	G	A	SNV	c(1, 10)	KLF16	jaspar2018	MA0741.1	MA0741.1	agggaaagtgGggggcggggg	0.952824	0.892454	10.873	10.1917	1.04904e-05	0.000110149	1	-0.681274	-0.0597329	weak
chr19	1027640	1027640	1	-	rs139106846	G	A	SNV	c(-3, 13)	SP4	jaspar2018	MA0685.1	MA0685.1	attcccagggaaagtgGggggcgggggttgtga	0.886488	0.848972	15.5405	14.8876	8.41025e-06	3.08224e-05	1	-0.652939	-0.0372766	weak
chr19	1027640	1027640	1	-	rs139106846	G	A	SNV	c(-3, 6)	ZNF740	jaspar2018	MA0753.1	MA0753.1	gggaaagtgGggggcgggg	0.908144	0.815586	10.2314	9.20304	6.58035e-05	0.000788689	1	-1.0284	-0.0913967	strong
chr5	35784714	35784714	1	-	rs141824653	T	C	SNV	c(-5, 8)	Bcl6	jaspar2018	MA0463.1	MA0463.1	tgaaactgaacttTccaggaagaaaag	0.988468	0.829854	11.51	9.69928	4.09782e-07	0.000297017	1	-1.81071	-0.155537	strong
chr5	35784714	35784714	1	+	rs141824653	T	C	SNV	c(-5, 11)	BCL6B	jaspar2018	MA0731.1	MA0731.1	ttttgaaactgaacttTccaggaagaaaagcag	0.722886	0.707816	20.367	19.9428	6.18512e-05	0.000101366	1	-0.424179	-0.0150593	weak
chr5	35784714	35784714	1	-	rs141824653	T	C	SNV	c(-6, 6)	HSF1	jaspar2018	MA0486.2	MA0486.2	gaaactgaacttTccaggaagaaaa	0.869884	0.763343	15.3174	13.4524	2.23517e-05	0.00041391	1	-1.86502	-0.105996	strong
chr5	35784714	35784714	1	-	rs141824653	T	C	SNV	c(-7, 7)	HSF1	jaspar2018	MA0486.1	MA0486.1	ttgaaactgaacttTccaggaagaaaagc	0.874667	0.802026	11.2766	10.3598	3.37921e-05	0.000291006	1	-0.916881	-0.0713048	strong
chr5	35784714	35784714	1	-	rs141824653	T	C	SNV	c(-6, 6)	HSF2	jaspar2018	MA0770.1	MA0770.1	gaaactgaacttTccaggaagaaaa	0.852106	0.740242	13.4949	11.7402	4.03374e-05	0.000750601	1	-1.7547	-0.110953	strong
chr5	35784714	35784714	1	-	rs141824653	T	C	SNV	c(-6, 6)	HSF4	jaspar2018	MA0771.1	MA0771.1	gaaactgaacttTccaggaagaaaa	0.89986	0.810543	10.7332	9.68617	3.17246e-05	0.000401691	1	-1.04704	-0.0879341	strong
chr5	35784714	35784714	1	+	rs141824653	T	C	SNV	c(-4, 5)	NFATC3	jaspar2018	MA0625.1	MA0625.1	actgaacttTccaggaaga	0.984852	0.868205	7.61098	6.72989	0.000116348	0.00306606	1	-0.881093	-0.114051	strong
chr5	35784714	35784714	1	+	rs141824653	T	C	SNV	c(-2, 8)	STAT1	jaspar2018	MA0137.3	MA0137.3	aactgaacttTccaggaagaa	0.993239	0.861692	13.0668	11.3428	1.66893e-06	0.000203133	1	-1.72402	-0.13105	strong
chr5	35784714	35784714	1	+	rs141824653	T	C	SNV	c(-4, 10)	STAT1	jaspar2018	MA0137.2	MA0137.2	ttgaaactgaacttTccaggaagaaaagc	0.97939	0.859362	11.1165	9.78188	4.35486e-06	0.000231846	1	-1.33465	-0.117635	strong
chr5	35784714	35784714	1	+	rs141824653	T	C	SNV	c(-1, 8)	Stat3	jaspar2018	MA0144.1	MA0144.1	actgaacttTccaggaaga	1	0.939102	12.173	11.4394	0	2.00272e-05	1	-0.733611	-0.0602653	strong
chr5	35784714	35784714	1	+	rs141824653	T	C	SNV	c(-2, 11)	Stat4	jaspar2018	MA0518.1	MA0518.1	tgaaactgaacttTccaggaagaaaag	0.988582	0.901591	11.4392	10.4412	2.09734e-06	0.00017396	1	-0.997979	-0.0862546	strong
chr5	35784714	35784714	1	+	rs141824653	T	C	SNV	c(-3, 7)	Stat5a::Stat5b	jaspar2018	MA0519.1	MA0519.1	aactgaacttTccaggaagaa	0.963477	0.878929	11.4626	10.46	1.5974e-05	0.000209093	1	-1.00267	-0.084288	strong
chr5	35784714	35784714	1	-	rs141824653	T	C	SNV	c(-4, 10)	Stat6	jaspar2018	MA0520.1	MA0520.1	ttgaaactgaacttCccaggaagaaaagc	0.840432	0.976306	10.5468	12.2383	0.000476385	8.32509e-06	1	1.69153	0.134963	strong
chr15	75063490	75063490	1	-	rs143628348	G	A	SNV	c(-12, 1)	Bcl6	jaspar2018	MA0463.1	MA0463.1	ctgctctccaggcAtgcctctgagcct	0.75984	0.870586	8.90002	10.1643	0.00133022	8.04327e-05	1	1.26425	0.108598	strong
chr15	75063490	75063490	1	+	rs143628348	G	A	SNV	c(-12, 4)	BCL6B	jaspar2018	MA0731.1	MA0731.1	cgcctgctctccaggcAtgcctctgagcctgcc	0.703534	0.773572	19.8223	21.7937	0.000116945	1.05802e-05	1	1.97143	0.0699903	strong
chr5	35876630	35876630	1	+	rs145513117	A	G	SNV	c(-10, 3)	Nr2f6	jaspar2018	MA0677.1	MA0677.1	gtgagcgacaaagGtgatttaaaaggg	0.679519	0.77242	11.0031	12.4772	0.00121448	9.98154e-05	1	1.47409	0.0916252	strong
chr5	35876630	35876630	1	+	rs145513117	A	G	SNV	c(-11, 3)	Pparg::Rxra	jaspar2018	MA0065.2	MA0065.2	cgtgagcgacaaagGtgatttaaaaggga	0.764408	0.858982	6.82982	7.63695	0.00103218	6.73011e-05	1	0.807126	0.0912992	strong
chr5	35876630	35876630	1	+	rs145513117	A	G	SNV	c(-13, 6)	PPARG::RXRA	jaspar2018	MA0065.1	MA0065.1	cttaccgtgagcgacaaagGtgatttaaaagggaagtct	0.681474	0.757927	13.4191	14.8997	0.000794449	9.55088e-05	1	1.4806	0.0755883	strong
chr5	35876630	35876630	1	-	rs145513117	A	G	SNV	c(-7, -1)	Sox2	jaspar2018	MA0143.3	MA0143.3	gacaaagGtgattta	0.834529	0.990532	10.656	12.6476	0.000793457	3.05176e-05	1	1.99156	0.155975	strong
chr5	35876630	35876630	1	-	rs145513117	A	G	SNV	c(-9, -1)	Sox3	jaspar2018	MA0514.1	MA0514.1	gcgacaaagGtgatttaaa	0.894114	0.939986	10.1035	10.6209	0.000236511	5.43594e-05	1	0.517441	0.0457998	weak
chr12	48109223	48109223	1	+	rs147874852	G	A	SNV	c(-6, 3)	SMAD3	jaspar2018	MA0795.1	MA0795.1	ctcagtctaGacctccaag	0.962955	0.832967	14.2589	12.3454	1.04904e-05	0.000357628	1	-1.91347	-0.129252	strong
chr11	36514290	36514290	1	+	rs2303439	T	C	SNV	c(-7, 5)	ASCL1	jaspar2018	MA1100.1	MA1100.1	ccacattggcagCtgaataggtgca	0.856299	0.964232	10.3389	11.6223	0.000325382	5.54025e-05	1	1.28346	0.106532	strong
chr11	36514290	36514290	1	-	rs2303439	T	C	SNV	c(-6, 3)	Myb	jaspar2018	MA0100.2	MA0100.2	cattggcagTtgaataggt	0.999322	0.884011	12.1071	10.7127	1.90735e-06	0.000246048	1	-1.39437	-0.115092	strong
chr11	36514290	36514290	1	-	rs2303439	T	C	SNV	c(-8, 4)	Myod1	jaspar2018	MA0499.1	MA0499.1	ccacattggcagCtgaataggtgca	0.896159	0.969001	10.5898	11.4458	0.000575602	7.96318e-05	1	0.855989	0.0724794	strong
chr11	36514290	36514290	1	+	rs2303439	T	C	SNV	c(-5, 5)	Myog	jaspar2018	MA0500.1	MA0500.1	acattggcagCtgaataggtg	0.883194	0.977056	10.6414	11.7684	0.000500917	6.98566e-05	1	1.12695	0.0935708	strong
chr11	36514290	36514290	1	+	rs2303439	T	C	SNV	c(-5, 5)	Tcf12	jaspar2018	MA0521.1	MA0521.1	acattggcagCtgaataggtg	0.869244	0.958815	10.5759	11.6617	0.000535011	8.86917e-05	1	1.08583	0.0892878	strong
chr11	36514290	36514290	1	-	rs2303439	T	C	SNV	c(-6, 4)	Tcf3	jaspar2018	MA0522.1	MA0522.1	acattggcagCtgaataggtg	0.909081	0.968919	10.6098	11.3043	0.000420332	5.50747e-05	1	0.694522	0.0595388	weak
chr2	102731150	102731150	1	-	rs1541570	G	A	SNV	c(-5, 5)	RUNX1	jaspar2018	MA0002.2	MA0002.2	ttatgtaaccAcaagatcaga	0.868798	0.976092	7.81959	8.76502	0.0009408	2.0504e-05	1	0.945434	0.105333	strong
chr2	102731150	102731150	1	-	rs1541570	G	A	SNV	c(-6, 8)	RUNX2	jaspar2018	MA0511.1	MA0511.1	ggatttatgtaaccAcaagatcagaactc	0.795421	0.955544	9.23736	11.0575	0.0014964	3.23998e-05	1	1.82009	0.15741	strong
chr2	102731150	102731150	1	+	rs1541570	G	A	SNV	c(-5, 3)	RUNX2	jaspar2018	MA0511.2	MA0511.2	atgtaaccGcaagatca	0.994767	0.955577	10.3541	9.95187	3.8147e-06	6.48499e-05	1	-0.402236	-0.0386475	weak
chr8	129593980	129593980	1	-	rs16903118	G	C	SNV	c(-5, 6)	IRF1	jaspar2018	MA0050.1	MA0050.1	catcatgatttCgctttgccagt	0.861849	0.949852	10.2263	11.2491	0.000103235	9.77516e-06	1	1.02272	0.0864376	strong
chr8	129593980	129593980	1	+	rs16903118	G	C	SNV	c(-9, 11)	IRF1	jaspar2018	MA0050.2	MA0050.2	ttccaatgacatcatgatttCgctttgccagtcatacctct	0.750354	0.846495	11.6218	13.0714	0.000760306	5.05973e-05	1	1.44968	0.0942199	strong
chr8	129593980	129593980	1	-	rs16903118	G	C	SNV	c(-10, 7)	IRF2	jaspar2018	MA0051.1	MA0051.1	caatgacatcatgatttCgctttgccagtcatacc	0.781636	0.892106	10.7803	12.2483	0.000273395	8.66567e-06	1	1.46801	0.107295	strong
chr8	129593980	129593980	1	-	rs16903118	G	C	SNV	c(-5, 8)	IRF7	jaspar2018	MA0772.1	MA0772.1	gacatcatgatttCgctttgccagtca	0.756056	0.859802	12.115	13.7551	0.000671752	4.38988e-05	1	1.64005	0.102687	strong
chr19	1096094	1096094	1	-	rs17523177	A	G	SNV	c(-5, 6)	Mafb	jaspar2018	MA0117.2	MA0117.2	tcgttaattcaGcatttactcag	0.811303	0.941267	7.95369	9.19899	0.00146127	6.72936e-05	1	1.24531	0.12757	strong
chr19	1096094	1096094	1	+	rs17523177	A	G	SNV	c(-9, 8)	MAFF	jaspar2018	MA0495.1	MA0495.1	atgcattcgttaattcaGcatttactcagcaacct	0.850692	0.960749	9.94401	11.1954	0.00027018	2.93355e-06	1	1.25139	0.107492	strong
chr19	1096094	1096094	1	-	rs17523177	A	G	SNV	c(-14, 6)	MAFF	jaspar2018	MA0495.2	MA0495.2	gtgatgcattcgttaattcaGcatttactcagcaacctaca	0.722508	0.788832	9.66066	10.4898	0.000301582	3.83275e-05	1	0.829169	0.0631517	strong
chr19	1096094	1096094	1	-	rs17523177	A	G	SNV	c(-14, 6)	MAFG	jaspar2018	MA0659.1	MA0659.1	gtgatgcattcgttaattcaGcatttactcagcaacctaca	0.720515	0.807554	9.66323	10.7851	0.000739752	5.75062e-05	1	1.12183	0.0845677	strong
chr19	1096094	1096094	1	+	rs17523177	A	G	SNV	c(-8, 6)	MAFK	jaspar2018	MA0496.1	MA0496.1	cattcgttaattcaGcatttactcagcaa	0.852854	0.973252	10.3527	11.7922	0.000285934	6.47642e-06	1	1.43945	0.118845	strong
chr19	1096094	1096094	1	+	rs17523177	A	G	SNV	c(-13, 5)	MAFK	jaspar2018	MA0496.2	MA0496.2	gatgcattcgttaattcaGcatttactcagcaaccta	0.71777	0.788977	9.97228	10.9132	0.000375634	4.33915e-05	1	0.940927	0.0686725	strong
chr19	1096094	1096094	1	-	rs17523177	A	G	SNV	c(-4, 6)	NRL	jaspar2018	MA0842.1	MA0842.1	cgttaattcaGcatttactca	0.80687	0.962679	5.49965	6.53116	0.00412154	0.000130177	1	1.03151	0.152179	strong
chr5	131992409	131992409	1	+	rs1881457	A	C	SNV	c(-8, 3)	SRF	jaspar2018	MA0083.1	MA0083.1	caggcccgtagAggggtcacacg	0.80927	0.714945	12.2555	10.8441	0.000103891	0.00112438	1	-1.41144	-0.0934137	strong
chr1	1167796	1167796	1	+	rs190796582	C	T	SNV	c(-2, 12)	SP2	jaspar2018	MA0516.1	MA0516.1	atgtcgggccgcagCccgcctccccccgc	0.938804	0.868006	10.8871	10.0781	1.68514e-05	0.000271944	1	-0.808998	-0.0698232	strong
chr14	68760141	68760141	1	+	rs1950897	C	T	SNV	c(-6, 1)	Sox2	jaspar2018	MA0143.3	MA0143.3	ccctttgTgtagact	0.831142	0.987145	10.6128	12.6043	0.00106812	4.57764e-05	1	1.99156	0.155975	strong
chr14	68760141	68760141	1	+	rs1950897	C	T	SNV	c(-6, 3)	Sox3	jaspar2018	MA0514.1	MA0514.1	ctccctttgTgtagactgg	0.784185	0.960938	8.86348	10.8573	0.00234222	2.00272e-05	1	1.99379	0.176475	strong
chr22	41809623	41809623	1	-	rs202634	A	G	SNV	c(-1, 12)	EGR1	jaspar2018	MA0162.2	MA0162.2	ggaggaggagaaaGaggaggaggaggg	0.82031	0.887995	9.68232	10.4727	0.000487454	7.51279e-05	1	0.790359	0.0670901	strong
chr12	6580249	6580249	1	-	rs2072378	T	C	SNV	c(-6, 7)	CTCFL	jaspar2018	MA1102.1	MA1102.1	ggaggcggcggctCcctggtgcgcgcc	0.771225	0.857182	9.87016	10.9358	0.000843585	9.78336e-05	1	1.06567	0.0838683	strong
chr12	6580249	6580249	1	-	rs2072378	T	C	SNV	c(-1, 8)	EBF1	jaspar2018	MA0154.1	MA0154.1	gcggcggctCcctggtgcg	0.739693	0.941315	6.39296	8.09075	0.00605202	9.25064e-05	1	1.6978	0.197765	strong
chr12	6580249	6580249	1	-	rs2072378	T	C	SNV	c(-4, 8)	ELF1	jaspar2018	MA0473.1	MA0473.1	gaggcggcggctTcctggtgcgcgc	0.935601	0.769296	11.3867	9.38784	3.56436e-05	0.00216486	1	-1.9989	-0.164373	strong
chr12	6580249	6580249	1	-	rs2072378	T	C	SNV	c(-4, 6)	ELF5	jaspar2018	MA0136.2	MA0136.2	ggcggcggctTcctggtgcgc	0.956274	0.738729	8.6131	6.68568	7.39098e-05	0.00899816	1	-1.92743	-0.214146	strong
chr12	6580249	6580249	1	-	rs2072378	T	C	SNV	c(-5, 5)	Erg	jaspar2018	MA0474.1	MA0474.1	ggcggcggctTcctggtgcgc	0.951799	0.781983	11.2957	9.29661	7.05719e-05	0.00253081	1	-1.9991	-0.168513	strong
chr12	6580249	6580249	1	+	rs2072378	T	C	SNV	c(-6, 8)	Ets1	jaspar2018	MA0098.2	MA0098.2	tggaggcggcggctTcctggtgcgcgccc	0.929821	0.756964	10.895	8.90181	3.28785e-05	0.00273856	1	-1.99319	-0.170297	strong
chr12	6580249	6580249	1	-	rs2072378	T	C	SNV	c(-5, 5)	FLI1	jaspar2018	MA0475.1	MA0475.1	ggcggcggctTcctggtgcgc	0.942697	0.766971	10.8153	8.81898	3.74317e-05	0.00287962	1	-1.99633	-0.174104	strong
chr12	6580249	6580249	1	+	rs2072378	T	C	SNV	c(-4, 9)	ZIC1	jaspar2018	MA0696.1	MA0696.1	ggaggcggcggctCcctggtgcgcgcc	0.738316	0.803168	12.3431	13.4179	0.000531506	8.94517e-05	1	1.0748	0.0644366	strong
chr6	42043402	42043402	1	-	rs2493838	C	G	SNV	c(-9, 5)	Nr2f6(var.2)	jaspar2018	MA0728.1	MA0728.1	ctcaatgacttcttGcccgtggaagaact	0.712911	0.775814	16.8711	18.3576	0.000255297	3.86797e-05	1	1.48647	0.0628385	strong
chr6	42043402	42043402	1	-	rs2493838	C	G	SNV	c(-9, 6)	Rarb	jaspar2018	MA0857.1	MA0857.1	tctcaatgacttcttGcccgtggaagaactt	0.6801	0.753464	17.1094	18.9475	0.000377898	3.98208e-05	1	1.8381	0.0731599	strong
chr6	42043402	42043402	1	-	rs2493838	C	G	SNV	c(-10, 5)	Rarg	jaspar2018	MA0859.1	MA0859.1	tctcaatgacttcttGcccgtggaagaactt	0.668145	0.749896	15.5027	17.392	0.000870704	8.88964e-05	1	1.88934	0.0815346	strong
chr14	35839236	35839236	1	-	rs2145623	G	C	SNV	c(-7, 7)	Ets1	jaspar2018	MA0098.2	MA0098.2	tttcggagaaacagGaaacggtctcagac	0.911538	0.738682	10.6842	8.69099	5.9546e-05	0.00371077	1	-1.99319	-0.170297	strong
chr10	75669190	75669190	1	-	rs2227551	G	T	SNV	c(-2, 12)	Bach1::Mafk	jaspar2018	MA0591.1	MA0591.1	aagcctatagcatcGctgactcagtctgt	0.862156	0.786948	13.9286	12.7279	2.7216e-05	0.000223602	1	-1.20076	-0.0744453	strong
chr10	75669190	75669190	1	-	rs2227551	G	T	SNV	c(-3, 10)	BACH2	jaspar2018	MA1101.1	MA1101.1	agcctatagcatcGctgactcagtctg	0.922032	0.874759	12.1061	11.499	8.05408e-06	4.42788e-05	1	-0.607127	-0.0463193	weak
chr10	75669190	75669190	1	-	rs2227551	G	T	SNV	c(-5, 9)	MAF::NFE2	jaspar2018	MA0501.1	MA0501.1	aagcctatagcatcGctgactcagtctgt	0.843115	0.77685	13.3316	12.2963	4.47454e-05	0.000291175	1	-1.03529	-0.0655963	strong
chr10	75669190	75669190	1	-	rs2227551	G	T	SNV	c(-5, 15)	MAFF	jaspar2018	MA0495.2	MA0495.2	gctctgaagcctatagcatcGctgactcagtctgtcccctg	0.779462	0.71094	10.3727	9.51605	5.30565e-05	0.00041364	1	-0.856643	-0.0652442	strong
chr10	75669190	75669190	1	-	rs2227551	G	T	SNV	c(-4, 14)	MAFK	jaspar2018	MA0496.2	MA0496.2	tctgaagcctatagcatcGctgactcagtctgtcccc	0.789478	0.707492	10.9198	9.83646	4.27657e-05	0.000485951	1	-1.08336	-0.0790676	strong
chr10	75669190	75669190	1	-	rs2227551	G	T	SNV	c(-1, 13)	Nfe2l2	jaspar2018	MA0150.2	MA0150.2	aagcctatagcatcGctgactcagtctgt	0.85528	0.754714	12.0091	10.6289	5.91874e-05	0.00084343	1	-1.38028	-0.0986233	strong
chr17	54911929	54911929	1	-	rs2235092	G	A	SNV	c(-7, 3)	SP1	jaspar2018	MA0079.3	MA0079.3	aggtggggcgGgttggggagt	0.918436	0.746343	10.7209	8.72252	8.2016e-05	0.00403261	1	-1.99835	-0.171268	strong
chr17	54911929	54911929	1	-	rs2235092	G	A	SNV	c(-11, 3)	SP2	jaspar2018	MA0516.1	MA0516.1	cccgaggtggggcgGgttggggagtgggg	0.93519	0.76484	10.8458	8.89925	1.97534e-05	0.00253824	1	-1.94655	-0.168004	strong
chr14	61919702	61919702	1	-	rs2296275	A	C	SNV	c(-5, 4)	NFATC3	jaspar2018	MA0625.1	MA0625.1	tcatggtggAaaaaatgta	0.991817	0.772531	7.66359	6.00722	2.19345e-05	0.00584126	1	-1.65637	-0.214406	strong
chr5	35905211	35905211	1	-	rs2361403	C	T	SNV	c(-10, 6)	Hmx1	jaspar2018	MA0896.1	MA0896.1	cagatttctagttaaaTgctcccgggttgcatg	0.78539	0.875818	8.95604	9.95788	0.000992475	8.95486e-05	1	1.00184	0.088395	strong
chr12	6554429	6554429	1	+	rs2534719	G	C	SNV	c(-9, 1)	USF1	jaspar2018	MA0093.2	MA0093.2	ggccaggtgaCtggcgaaaga	0.871314	0.952536	10.49	11.4612	0.000327587	3.69549e-05	1	0.971252	0.0807438	strong
chr12	6554429	6554429	1	+	rs2534719	G	C	SNV	c(-9, 1)	USF2	jaspar2018	MA0526.1	MA0526.1	ggccaggtgaCtggcgaaaga	0.91736	0.969023	11.2416	11.8715	0.000211954	2.5034e-05	1	0.629911	0.0514244	weak
chr12	6554429	6554429	1	-	rs2534719	G	C	SNV	c(-7, 1)	ZEB1	jaspar2018	MA0103.2	MA0103.2	ccaggtgaGtggcgaaa	0.998308	0.907077	12.6199	11.4703	3.8147e-06	0.0001297	1	-1.1496	-0.0909405	strong
chr5	96204488	96204488	1	+	rs2617450	G	C	SNV	c(-3, 6)	MZF1(var.2)	jaspar2018	MA0057.1	MA0057.1	gctgttggaGgggcaaggc	0.981715	0.882111	5.93002	5.34553	2.47955e-05	0.00130272	1	-0.58449	-0.0968128	weak
chr19	49217261	49217261	1	+	rs281385	A	G	SNV	c(-4, 5)	Arntl	jaspar2018	MA0603.1	MA0603.1	atccgcggcAcgtggaaga	0.94736	0.834681	9.53942	8.42416	7.53403e-05	0.00116062	1	-1.11526	-0.110856	strong
chr19	49217261	49217261	1	-	rs281385	A	G	SNV	c(-4, 6)	Bhlhe40	jaspar2018	MA0464.1	MA0464.1	tatccgcggcAcgtggaagag	0.970197	0.796403	11.2144	9.21539	5.67436e-05	0.00241494	1	-1.99905	-0.172969	strong
chr19	49217261	49217261	1	-	rs281385	A	G	SNV	c(-3, 6)	BHLHE40	jaspar2018	MA0464.2	MA0464.2	atccgcggcAcgtggaaga	0.97882	0.843942	11.5127	9.93873	7.82013e-05	0.000517845	1	-1.574	-0.133844	strong
chr19	49217261	49217261	1	+	rs281385	A	G	SNV	c(-3, 5)	Creb3l2	jaspar2018	MA0608.1	MA0608.1	tccgcggcAcgtggaag	0.953544	0.787367	11.1994	9.25076	4.57764e-05	0.00216293	1	-1.94865	-0.165925	strong
chr19	49217261	49217261	1	+	rs281385	A	G	SNV	c(-7, 5)	Hes2	jaspar2018	MA0616.1	MA0616.1	ggtatccgcggcAcgtggaagaggt	0.956549	0.722499	6.00483	4.60721	2.79248e-05	0.00862819	1	-1.39762	-0.223108	strong
chr19	49217261	49217261	1	-	rs281385	A	G	SNV	c(-4, 7)	HES5	jaspar2018	MA0821.1	MA0821.1	gtatccgcggcAcgtggaagagg	0.86398	0.753362	15.1546	13.218	5.07236e-05	0.000761032	1	-1.93652	-0.110432	strong
chr19	49217261	49217261	1	-	rs281385	A	G	SNV	c(-4, 7)	HES7	jaspar2018	MA0822.1	MA0822.1	gtatccgcggcAcgtggaagagg	0.83282	0.729538	15.7156	13.7715	3.66569e-05	0.000585198	1	-1.9441	-0.103067	strong
chr19	49217261	49217261	1	-	rs281385	A	G	SNV	c(-3, 6)	HEY1	jaspar2018	MA0823.1	MA0823.1	atccgcggcAcgtggaaga	0.982064	0.885635	11.0699	9.99723	2.00272e-05	0.000267982	1	-1.07268	-0.0951847	strong
chr19	49217261	49217261	1	+	rs281385	A	G	SNV	c(-3, 6)	HEY2	jaspar2018	MA0649.1	MA0649.1	atccgcggcAcgtggaaga	0.968031	0.833927	10.4397	9.01475	4.19617e-05	0.000831604	1	-1.42499	-0.132195	strong
chr19	49217261	49217261	1	+	rs281385	A	G	SNV	c(-2, 5)	Id2	jaspar2018	MA0617.1	MA0617.1	ccgcggcAcgtggaa	0.993765	0.831116	12.1828	10.1949	3.05176e-05	0.000793457	1	-1.98798	-0.162164	strong
chr19	49217261	49217261	1	-	rs281385	A	G	SNV	c(-3, 6)	MAX	jaspar2018	MA0058.3	MA0058.3	atccgcggcAcgtggaaga	0.992088	0.840033	10.7677	9.12836	9.05991e-05	0.00120449	1	-1.63939	-0.151053	strong
chr19	49217261	49217261	1	+	rs281385	A	G	SNV	c(-4, 6)	MAX::MYC	jaspar2018	MA0059.1	MA0059.1	tatccgcggcAcgtggaagag	0.933211	0.777889	10.1814	8.52868	3.31402e-05	0.00128794	1	-1.65275	-0.151739	strong
chr19	49217261	49217261	1	+	rs281385	A	G	SNV	c(-2, 5)	Mlxip	jaspar2018	MA0622.1	MA0622.1	ccgcggcAcgtggaa	0.99397	0.830253	12.1036	10.1156	4.57764e-05	0.00106812	1	-1.98797	-0.163258	strong
chr19	49217261	49217261	1	-	rs281385	A	G	SNV	c(-4, 8)	MXI1	jaspar2018	MA1108.1	MA1108.1	ggtatccgcggcAcgtggaagaggt	0.996532	0.844213	10.382	8.81991	1.05798e-05	0.000366643	1	-1.56214	-0.149952	strong
chr19	49217261	49217261	1	+	rs281385	A	G	SNV	c(-3, 6)	Myc	jaspar2018	MA0147.1	MA0147.1	atccgcggcAcgtggaaga	0.990004	0.834727	9.57776	8.08988	1.04904e-05	0.000742912	1	-1.48788	-0.15381	strong
chr19	49217261	49217261	1	-	rs281385	A	G	SNV	c(-4, 5)	Myc	jaspar2018	MA0147.2	MA0147.2	atccgcggcAcgtggaaga	0.966669	0.795256	11.3059	9.30847	7.62939e-05	0.00212097	1	-1.9974	-0.170802	strong
chr19	49217261	49217261	1	-	rs281385	A	G	SNV	c(-4, 7)	MYC	jaspar2018	MA0147.3	MA0147.3	gtatccgcggcAcgtggaagagg	0.9979	0.851528	10.1226	8.66681	9.89437e-06	0.000430524	1	-1.45583	-0.143523	strong
chr19	49217261	49217261	1	-	rs281385	A	G	SNV	c(-1, 6)	Mycn	jaspar2018	MA0104.3	MA0104.3	ccgcggcAcgtggaa	0.994423	0.833344	12.3197	10.3286	3.05176e-05	0.000946045	1	-1.99116	-0.160724	strong
chr19	49217261	49217261	1	+	rs281385	A	G	SNV	c(-3, 6)	Mycn	jaspar2018	MA0104.2	MA0104.2	atccgcggcAcgtggaaga	0.976507	0.897314	9.47256	8.71616	2.67029e-05	0.000425339	1	-0.756402	-0.0780041	strong
chr19	49217261	49217261	1	+	rs281385	A	G	SNV	c(-3, 6)	Npas2	jaspar2018	MA0626.1	MA0626.1	atccgcggcAcgtggaaga	0.986987	0.8001	10.5536	8.56561	6.19888e-05	0.00299931	1	-1.98797	-0.18593	strong
chr19	49217261	49217261	1	-	rs281385	A	G	SNV	c(-3, 6)	TFE3	jaspar2018	MA0831.1	MA0831.1	atccgcggcAcgtggaaga	0.969342	0.884787	7.89841	7.22431	7.62939e-05	0.000776291	1	-0.674103	-0.0827848	weak
chr19	49217261	49217261	1	-	rs281385	A	G	SNV	c(-3, 6)	TFEB	jaspar2018	MA0692.1	MA0692.1	atccgcggcAcgtggaaga	0.944829	0.808088	9.34128	8.00895	7.9155e-05	0.00180054	1	-1.33233	-0.134867	strong
chr19	49217261	49217261	1	+	rs281385	A	G	SNV	c(-1, 5)	USF1	jaspar2018	MA0093.1	MA0093.1	cgcggcAcgtgga	1	0.856651	9.5877	8.22747	0	0.00109863	1	-1.36022	-0.141872	strong
chr19	49217261	49217261	1	+	rs281385	A	G	SNV	c(-7, 8)	USF2	jaspar2018	MA0526.2	MA0526.2	cggggtatccgcggcAcgtggaagaggtggc	0.894082	0.752118	11.7045	9.87226	9.37704e-05	0.00200956	1	-1.83222	-0.140169	strong
chr1	8484823	8484823	1	-	rs301807	A	G	SNV	c(-16, 3)	RREB1	jaspar2018	MA0073.1	MA0073.1	gaacaaagggtggtgggtgGagctaggaagaggaagcaa	0.7194	0.778095	9.45897	10.1985	0.00060662	9.50037e-05	1	0.739515	0.0569106	strong
chr10	75619202	75619202	1	+	rs2664281	A	G	SNV	c(-6, 8)	Bach1::Mafk	jaspar2018	MA0591.1	MA0591.1	tttttagaccactgAgtcagccaagcaaa	0.856787	0.74177	13.8429	12.0065	3.09385e-05	0.000633285	1	-1.83635	-0.113851	strong
chr10	75619202	75619202	1	+	rs2664281	A	G	SNV	c(-4, 9)	BACH2	jaspar2018	MA1101.1	MA1101.1	ttttagaccactgAgtcagccaagcaa	0.921181	0.788763	12.0952	10.3946	8.41916e-06	0.000420727	1	-1.70061	-0.129744	strong
chr10	75619202	75619202	1	-	rs2664281	A	G	SNV	c(-4, 6)	FOS	jaspar2018	MA0476.1	MA0476.1	tagaccactgAgtcagccaag	0.94719	0.788196	11.9594	9.95989	8.86917e-05	0.00230694	1	-1.99947	-0.158393	strong
chr10	75619202	75619202	1	+	rs2664281	A	G	SNV	c(-3, 6)	FOS::JUN	jaspar2018	MA0099.3	MA0099.3	agaccactgAgtcagccaa	0.950713	0.860331	9.929	8.99574	6.10352e-05	0.000652313	1	-0.933267	-0.0894111	strong
chr10	75619202	75619202	1	+	rs2664281	A	G	SNV	c(-5, 7)	FOS::JUND	jaspar2018	MA1141.1	MA1141.1	tttagaccactgAgtcagccaagca	0.948266	0.840754	11.4744	10.1841	4.72367e-05	0.000586405	1	-1.29028	-0.106677	strong
chr10	75619202	75619202	1	-	rs2664281	A	G	SNV	c(-3, 6)	FOSB::JUNB	jaspar2018	MA1135.1	MA1135.1	agaccactgAgtcagccaa	0.949289	0.804603	10.8969	9.24804	9.53674e-05	0.00162792	1	-1.64888	-0.143696	strong
chr10	75619202	75619202	1	-	rs2664281	A	G	SNV	c(-4, 6)	FOSL1	jaspar2018	MA0477.1	MA0477.1	tagaccactgAgtcagccaag	0.967794	0.814372	12.6425	10.6451	3.79086e-05	0.00115824	1	-1.99737	-0.152918	strong
chr10	75619202	75619202	1	-	rs2664281	A	G	SNV	c(-5, 7)	FOSL1::JUN	jaspar2018	MA1128.1	MA1128.1	tttagaccactgAgtcagccaagca	0.952534	0.86201	10.4233	9.44409	4.54038e-05	0.000527591	1	-0.979178	-0.0895314	strong
chr10	75619202	75619202	1	-	rs2664281	A	G	SNV	c(-5, 7)	FOSL1::JUNB	jaspar2018	MA1137.1	MA1137.1	tttagaccactgAgtcagccaagca	0.948529	0.839263	7.13275	6.33899	6.55502e-05	0.00112201	1	-0.793764	-0.105741	strong
chr10	75619202	75619202	1	-	rs2664281	A	G	SNV	c(-3, 7)	FOSL2	jaspar2018	MA0478.1	MA0478.1	tagaccactgAgtcagccaag	0.964371	0.814903	12.2013	10.3184	4.88758e-05	0.00136471	1	-1.88284	-0.14884	strong
chr10	75619202	75619202	1	+	rs2664281	A	G	SNV	c(-5, 6)	FOSL2::JUN	jaspar2018	MA1130.1	MA1130.1	ttagaccactgAgtcagccaagc	0.956145	0.857451	10.446	9.37832	5.81741e-05	0.000703573	1	-1.06771	-0.0977716	strong
chr10	75619202	75619202	1	-	rs2664281	A	G	SNV	c(-3, 6)	FOSL2::JUND	jaspar2018	MA1144.1	MA1144.1	agaccactgAgtcagccaa	0.943738	0.814702	11.1005	9.59418	0.000105858	0.00133896	1	-1.50629	-0.128116	strong
chr10	75619202	75619202	1	-	rs2664281	A	G	SNV	c(-3, 10)	JUN(var.2)	jaspar2018	MA0489.1	MA0489.1	ttttagaccactgAgtcagccaagcaa	0.956082	0.807369	11.9105	10.0765	0.000108607	0.00186397	1	-1.83401	-0.147285	strong
chr10	75619202	75619202	1	-	rs2664281	A	G	SNV	c(-3, 7)	JUNB	jaspar2018	MA0490.1	MA0490.1	tagaccactgAgtcagccaag	0.968692	0.810353	12.272	10.2729	5.72205e-05	0.00171709	1	-1.99911	-0.157817	strong
chr10	75619202	75619202	1	-	rs2664281	A	G	SNV	c(-4, 6)	JUND	jaspar2018	MA0491.1	MA0491.1	tagaccactgAgtcagccaag	0.919684	0.771502	12.4354	10.4359	0.000100136	0.0022912	1	-1.99959	-0.147907	strong
chr10	75619202	75619202	1	+	rs2664281	A	G	SNV	c(-3, 11)	MAF::NFE2	jaspar2018	MA0501.1	MA0501.1	tttttagaccactgAgtcagccaagcaaa	0.836971	0.709671	13.2356	11.2468	5.46006e-05	0.00144164	1	-1.98887	-0.126016	strong
chr10	75619202	75619202	1	+	rs2664281	A	G	SNV	c(-9, 11)	MAFF	jaspar2018	MA0495.2	MA0495.2	aaaatatttttagaccactgAgtcagccaagcaaaacatgc	0.781513	0.690559	10.3983	9.26125	4.93472e-05	0.000725022	1	-1.13709	-0.0866038	strong
chr10	75619202	75619202	1	+	rs2664281	A	G	SNV	c(-8, 10)	MAFK	jaspar2018	MA0496.2	MA0496.2	aatatttttagaccactgAgtcagccaagcaaaacat	0.786862	0.696768	10.8853	9.69476	4.62129e-05	0.000652882	1	-1.19049	-0.0868869	strong
chr10	75619202	75619202	1	+	rs2664281	A	G	SNV	c(-7, 7)	Nfe2l2	jaspar2018	MA0150.2	MA0150.2	tttttagaccactgAgtcagccaagcaaa	0.840528	0.695982	11.8067	9.82276	9.51476e-05	0.0028739	1	-1.98391	-0.141754	strong
chr3	101230678	101230678	1	-	rs34255148	G	T	SNV	c(-4, 7)	ZNF384	jaspar2018	MA1125.1	MA1125.1	ttgttgttgttTtttgatacaga	0.814021	0.971532	10.1332	12.0634	0.00150716	6.91414e-05	1	1.93017	0.155506	strong
chr6	559576	559576	1	-	rs3757114	A	C	SNV	c(-17, -1)	EWSR1-FLI1	jaspar2018	MA0149.1	MA0149.1	agttctttcgtccctgcCgatagttatgtggcttg	0.614341	0.676417	19.0038	20.9137	0.000717361	8.85883e-05	1	1.90988	0.0618702	strong
chr12	6433202	6433202	1	+	rs3782719	G	T	SNV	c(-3, 7)	Erg	jaspar2018	MA0474.1	MA0474.1	tgggtacaaaGgaagaagaat	0.94946	0.779643	11.2682	9.26907	8.08239e-05	0.00268078	1	-1.9991	-0.168513	strong
chr12	6433202	6433202	1	-	rs3782719	G	T	SNV	c(-6, 8)	Ets1	jaspar2018	MA0098.2	MA0098.2	tccatgggtacaaaGgaagaagaatcctg	0.899225	0.726369	10.5422	8.54901	9.02871e-05	0.00452304	1	-1.99319	-0.170297	strong
chr12	6433202	6433202	1	-	rs3782719	G	T	SNV	c(-6, 1)	Sox2	jaspar2018	MA0143.3	MA0143.3	gtacaaaGgaagaag	0.978899	0.822896	12.499	10.5075	9.15527e-05	0.00189209	1	-1.99156	-0.155975	strong
chr12	6433202	6433202	1	-	rs3782719	G	T	SNV	c(-8, 1)	Sox3	jaspar2018	MA0514.1	MA0514.1	gggtacaaaGgaagaagaa	0.952719	0.873768	10.7646	9.87398	3.05176e-05	0.000398636	1	-0.890577	-0.0788268	strong
chr17	4458598	4458598	1	-	rs3809849	G	T	SNV	c(-2, 9)	E2F8	jaspar2018	MA0865.1	MA0865.1	cgacatcggctTggcgggatccc	0.70414	0.778137	13.8364	15.281	0.000502288	6.38962e-05	1	1.44463	0.0736589	strong
chr17	4458598	4458598	1	-	rs3809849	G	T	SNV	c(-6, 8)	SP2	jaspar2018	MA0516.1	MA0516.1	aggcgacatcggctGggcgggatcccggc	0.90035	0.838933	10.4477	9.74589	9.56031e-05	0.000597314	1	-0.701803	-0.0605714	strong
chr2	231083308	231083308	1	-	rs41309074	C	T	SNV	c(-4, 14)	REST	jaspar2018	MA0138.1	MA0138.1	caattcattatacagcagCgctcagaacaggaagtct	0.743139	0.71129	12.9719	12.4313	8.1777e-05	0.000221514	1	-0.540625	-0.0311921	weak
chr6	167383972	167383972	1	-	rs429083	T	C	SNV	c(-5, 5)	SOX13	jaspar2018	MA1120.1	MA1120.1	agcagccccaTtgtctaggga	0.998517	0.820035	9.30548	7.66965	1.43051e-05	0.00197148	1	-1.63583	-0.175536	strong
chr6	167383972	167383972	1	+	rs429083	T	C	SNV	c(-3, 6)	SOX15	jaspar2018	MA1152.1	MA1152.1	gcagccccaTtgtctaggg	0.982429	0.750774	7.97026	6.11801	7.72476e-05	0.0109997	1	-1.85226	-0.22837	strong
chr6	167383972	167383972	1	+	rs429083	T	C	SNV	c(-4, 4)	Sox17	jaspar2018	MA0078.1	MA0078.1	cagccccaTtgtctagg	0.999176	0.82508	8.58709	7.10883	1.52588e-05	0.00134277	1	-1.47826	-0.172009	strong
chr6	167383972	167383972	1	+	rs429083	T	C	SNV	c(-3, 4)	Sox2	jaspar2018	MA0143.3	MA0143.3	agccccaTtgtctag	0.983199	0.827196	12.554	10.5624	6.10352e-05	0.00134277	1	-1.99156	-0.155975	strong
chr6	167383972	167383972	1	+	rs429083	T	C	SNV	c(-3, 6)	Sox6	jaspar2018	MA0515.1	MA0515.1	gcagccccaTtgtctaggg	0.980398	0.804789	10.9723	9.01434	1.33514e-05	0.00206947	1	-1.95792	-0.174958	strong
chr6	167383972	167383972	1	+	rs429083	T	C	SNV	c(-3, 5)	SOX9	jaspar2018	MA0077.1	MA0077.1	cagccccaTtgtctagg	0.94151	0.7513	6.92881	5.56334	7.62939e-05	0.00597763	1	-1.36547	-0.185811	strong
chr2	191991459	191991459	1	-	rs4555370	T	C	SNV	c(-11, 4)	EGR4	jaspar2018	MA0733.1	MA0733.1	gacagattgggtgggCttcttctgtaagtac	0.781919	0.84524	9.21345	9.93247	0.00051424	0.000101979	1	0.719017	0.0615083	strong
chr10	112148604	112148604	1	+	rs4918502	C	T	SNV	c(-6, 4)	SOX13	jaspar2018	MA1120.1	MA1120.1	ccaacaacaaTgtgaagcaca	0.81623	0.978537	7.63478	9.12236	0.00263667	0.000196457	1	1.48759	0.159628	strong
chr5	96285006	96285006	1	-	rs27731	C	T	SNV	c(-2, 11)	EGR1	jaspar2018	MA0162.3	MA0162.3	aagtgagcgttacTgcctgggcgcctc	0.79077	0.843456	14.5653	15.5307	0.00018305	4.18276e-05	1	0.965411	0.0524702	strong
chr5	96285006	96285006	1	-	rs27731	C	T	SNV	c(-2, 12)	EGR3	jaspar2018	MA0732.1	MA0732.1	caagtgagcgttacTgcctgggcgcctct	0.803134	0.846173	13.3994	14.1101	0.000204555	6.20298e-05	1	0.71071	0.0426845	strong
chr11	36510026	36510026	1	-	rs5030482	T	C	SNV	c(-1, 6)	Atf3	jaspar2018	MA0605.1	MA0605.1	gatacaaCgtcatct	0.925185	1	9.71281	10.4917	0.000198364	0	1	0.778935	0.0742426	strong
chr11	36510026	36510026	1	-	rs5030482	T	C	SNV	c(-2, 9)	CREB1	jaspar2018	MA0018.1	MA0018.1	gggggatacaaCgtcatctctca	0.779263	0.958395	7.01769	8.58871	0.00352949	8.95262e-05	1	1.57102	0.175463	strong
chr11	36510026	36510026	1	+	rs5030482	T	C	SNV	c(-6, 7)	CREB3	jaspar2018	MA0638.1	MA0638.1	ctgggggatacaaCgtcatctctcatt	0.71688	0.862974	9.88881	11.8678	0.00277563	0.00010014	1	1.97894	0.144197	strong
chr11	36510026	36510026	1	-	rs5030482	T	C	SNV	c(-3, 6)	Crem	jaspar2018	MA0609.1	MA0609.1	gggatacaaCgtcatctct	0.797944	0.972572	9.21299	11.201	0.00180626	5.53131e-05	1	1.98797	0.172669	strong
chr11	36510026	36510026	1	-	rs5030482	T	C	SNV	c(1, 11)	PKNOX2	jaspar2018	MA0783.1	MA0783.1	gggggatacaaTgtcatctctca	0.796909	0.712635	16.2926	14.5719	8.27312e-05	0.000742435	1	-1.7207	-0.0841858	strong
chr11	36510026	36510026	1	+	rs5030482	T	C	SNV	c(-6, 4)	SOX13	jaspar2018	MA1120.1	MA1120.1	ggggatacaaTgtcatctctc	0.978027	0.815719	9.11769	7.6301	0.000213623	0.00268579	1	-1.48759	-0.159628	strong
chr11	36510026	36510026	1	-	rs5030482	T	C	SNV	c(1, 11)	TGIF1	jaspar2018	MA0796.1	MA0796.1	gggggatacaaTgtcatctctca	0.783427	0.696932	17.1097	15.222	9.98378e-05	0.000839591	1	-1.88769	-0.0864477	strong
chr11	36510026	36510026	1	-	rs5030482	T	C	SNV	c(1, 11)	TGIF2	jaspar2018	MA0797.1	MA0797.1	gggggatacaaTgtcatctctca	0.813619	0.735321	13.9571	12.6261	5.85914e-05	0.000488579	1	-1.33102	-0.077722	strong
chr10	75670463	75670463	1	-	rs531449884	C	T	SNV	c(-6, 10)	Rhox11	jaspar2018	MA0629.1	MA0629.1	gcgttgatgaagacttTacagctccatcagctg	0.912445	0.971356	8.6218	9.16378	0.000140868	6.9692e-06	1	0.541978	0.0574903	weak
chr19	1075032	1075032	1	+	rs536357986	C	A	SNV	c(-7, 6)	GLIS2	jaspar2018	MA0736.1	MA0736.1	ctgggccgcccccCccaacgccaagcc	0.886133	0.811556	13.2056	12.1022	1.89878e-05	0.000183277	1	-1.10337	-0.0740999	strong
chr19	1075032	1075032	1	+	rs536357986	C	A	SNV	c(-7, 6)	GLIS3	jaspar2018	MA0737.1	MA0737.1	ctgggccgcccccCccaacgccaagcc	0.776072	0.701934	15.0205	13.59	9.08226e-05	0.000686981	1	-1.43054	-0.0739627	strong
chr19	1075032	1075032	1	+	rs536357986	C	A	SNV	c(-9, 1)	KLF16	jaspar2018	MA0741.1	MA0741.1	ggccgcccccCccaacgccaa	0.917962	0.881438	10.4795	10.0674	4.29153e-05	0.000138521	1	-0.412173	-0.0361386	weak
chr19	1075032	1075032	1	+	rs536357986	C	A	SNV	c(-6, 3)	KLF5	jaspar2018	MA0599.1	MA0599.1	gccgcccccCccaacgcca	0.980702	0.922437	11.2604	10.5935	3.24249e-05	0.000191689	1	-0.666956	-0.0580904	weak
chr19	1075032	1075032	1	+	rs536357986	C	A	SNV	c(-5, 4)	ZNF740	jaspar2018	MA0753.1	MA0753.1	gccgcccccCccaacgcca	0.977548	0.877816	11.0026	9.89447	4.76837e-06	0.0001297	1	-1.10811	-0.0984804	strong
chr19	1095850	1095850	1	-	rs545796123	G	A	SNV	c(-4, 5)	Myb	jaspar2018	MA0100.2	MA0100.2	actttagacAgttaactga	0.815718	0.947671	9.88686	11.4825	0.00128078	7.15256e-05	1	1.59562	0.131704	strong
chr10	75571943	75571943	1	+	rs549655525	C	G	SNV	c(-12, 1)	EGR1	jaspar2018	MA0162.2	MA0162.2	gcaacctccccctCccaggttcaagcg	0.949264	0.884886	11.1881	10.4364	8.08015e-06	8.47653e-05	1	-0.751742	-0.0638121	strong
chr10	75571943	75571943	1	-	rs549655525	C	G	SNV	c(-6, 3)	Klf4	jaspar2018	MA0039.2	MA0039.2	cctccccctCccaggttca	0.937846	0.770681	10.3313	8.51221	0.000102043	0.00311756	1	-1.81912	-0.165259	strong
chr10	75571943	75571943	1	+	rs549655525	C	G	SNV	c(-6, 3)	KLF5	jaspar2018	MA0599.1	MA0599.1	cctccccctCccaggttca	0.978699	0.804078	11.2375	9.2386	3.71933e-05	0.00212193	1	-1.99891	-0.1741	strong
chr10	75571943	75571943	1	+	rs549655525	C	G	SNV	c(-6, 4)	SP1	jaspar2018	MA0079.3	MA0079.3	acctccccctCccaggttcaa	0.918981	0.803501	10.7272	9.38624	7.77245e-05	0.00159144	1	-1.34096	-0.114926	strong
chr15	75069974	75069974	1	-	rs56066141	A	G	SNV	c(-19, -1)	RREB1	jaspar2018	MA0073.1	MA0073.1	gggaggaggctgggtggagGgaggagcggcccttccctt	0.796424	0.843265	10.4294	11.0196	4.88826e-05	7.05322e-06	1	0.590174	0.0454178	weak
chr1	210009384	210009384	1	-	rs56268268	A	C	SNV	c(-5, 8)	CTCFL	jaspar2018	MA1102.1	MA1102.1	tgcctccctctgcCccctgccccaccc	0.810301	0.938823	10.3546	11.948	0.000319961	7.17118e-06	1	1.59339	0.1254	strong
chr1	210009384	210009384	1	-	rs56268268	A	C	SNV	c(-3, 8)	INSM1	jaspar2018	MA0155.1	MA0155.1	cctccctctgcCccctgccccac	0.760242	0.919211	8.2021	9.88983	0.00204086	2.0802e-05	1	1.68774	0.157035	strong
chr1	210009384	210009384	1	+	rs56268268	A	C	SNV	c(-5, 8)	MTF1	jaspar2018	MA0863.1	MA0863.1	tgcctccctctgcAccctgccccaccc	0.797739	0.708258	14.3442	12.7559	4.48227e-05	0.000563379	1	-1.58825	-0.0885598	strong
chr1	210009384	210009384	1	-	rs56268268	A	C	SNV	c(-3, 11)	NR2C2	jaspar2018	MA0504.1	MA0504.1	ctgcctccctctgcCccctgccccacccc	0.756894	0.829693	9.7475	10.6762	0.000411264	4.36464e-05	1	0.92869	0.0722786	strong
chr1	210009384	210009384	1	-	rs56268268	A	C	SNV	c(-10, 3)	PLAG1	jaspar2018	MA0163.1	MA0163.1	tgcctccctctgcCccctgccccaccc	0.745953	0.834067	10.5775	11.7992	0.000434093	3.17357e-05	1	1.22167	0.0866443	strong
chr1	210009384	210009384	1	-	rs56268268	A	C	SNV	c(-3, 11)	Pparg::Rxra	jaspar2018	MA0065.2	MA0065.2	ctgcctccctctgcCccctgccccacccc	0.781408	0.864522	6.9749	7.68423	0.000686668	5.6304e-05	1	0.70933	0.0802369	strong
chr1	210009384	210009384	1	-	rs56268268	A	C	SNV	c(1, 9)	SP1	jaspar2018	MA0079.1	MA0079.1	tccctctgcAccctgcccc	0.98475	0.87244	5.19378	4.62881	6.67572e-06	0.00112438	1	-0.564971	-0.107195	weak
chr19	1131012	1131012	1	+	rs56744597	C	T	SNV	c(-3, 4)	Bhlha15	jaspar2018	MA0607.1	MA0607.1	ctgttcaTatgtggg	0.905335	0.967749	9.71662	10.3862	0.000335693	7.62939e-05	1	0.669574	0.0623894	weak
chr19	1131012	1131012	1	-	rs56744597	C	T	SNV	c(-6, 9)	SRF	jaspar2018	MA0083.3	MA0083.3	ggctggccctgttcaTatgtgggaagctgaa	0.694686	0.793151	13.3529	15.218	0.00115759	8.89176e-05	1	1.86512	0.0974659	strong
chr19	1131012	1131012	1	+	rs56744597	C	T	SNV	c(-4, 5)	Twist2	jaspar2018	MA0633.1	MA0633.1	ccctgttcaTatgtgggaa	0.934019	0.975622	10.1392	10.5865	0.000127792	4.19617e-05	1	0.447332	0.0412339	weak
chr19	1087564	1087564	1	-	rs573877413	G	A	SNV	c(-1, 9)	NFKB1	jaspar2018	MA0105.2	MA0105.2	ccccagtcccGggaaccccca	0.920513	0.777712	10.5931	8.9849	1.95503e-05	0.000921726	1	-1.60822	-0.139987	strong
chr19	1087564	1087564	1	+	rs573877413	G	A	SNV	c(-2, 10)	NFKB1	jaspar2018	MA0105.4	MA0105.4	ctccccagtcccGggaacccccatc	0.799316	0.695026	15.383	13.3879	9.22531e-05	0.00137098	1	-1.9951	-0.103792	strong
chr19	1087564	1087564	1	-	rs573877413	G	A	SNV	c(-1, 9)	NFKB1	jaspar2018	MA0105.3	MA0105.3	ccccagtcccGggaaccccca	0.932738	0.802885	11.5493	9.95222	8.34465e-05	0.00125933	1	-1.59706	-0.129039	strong
chr19	1087770	1087770	1	-	rs576990955	C	T	SNV	c(-10, 4)	Klf12	jaspar2018	MA0742.1	MA0742.1	cagaacagtgggcgTgttacagaccaccg	0.743087	0.858437	11.13	12.8417	0.00132035	8.29492e-05	1	1.71173	0.114555	strong
chr19	1087770	1087770	1	-	rs576990955	C	T	SNV	c(-12, 5)	KLF13	jaspar2018	MA0657.1	MA0657.1	gcacagaacagtgggcgTgttacagaccaccgacc	0.746686	0.856368	13.4169	15.3548	0.000365566	1.16312e-05	1	1.93794	0.108309	strong
chr19	1087770	1087770	1	-	rs576990955	C	T	SNV	c(-9, 4)	KLF14	jaspar2018	MA0740.1	MA0740.1	agaacagtgggcgTgttacagaccacc	0.865398	0.953488	12.0941	13.313	7.91922e-05	3.241e-06	1	1.21888	0.0873339	strong
chr19	1087770	1087770	1	-	rs576990955	C	T	SNV	c(-7, 3)	KLF16	jaspar2018	MA0741.1	MA0741.1	acagtgggcgTgttacagacc	0.878083	0.939148	10.0295	10.7186	0.000154972	1.71661e-05	1	0.689124	0.0604212	weak
chr19	1087770	1087770	1	-	rs576990955	C	T	SNV	c(-8, 4)	KLF9	jaspar2018	MA1107.1	MA1107.1	gaacagtgggcgTgttacagaccac	0.772104	0.901021	9.01268	10.4781	0.0015011	7.65473e-05	1	1.46541	0.126294	strong
chr19	1087770	1087770	1	+	rs576990955	C	T	SNV	c(-11, 3)	SOX21	jaspar2018	MA0866.1	MA0866.1	cagaacagtgggcgTgttacagaccaccg	0.71076	0.797647	15.4234	17.2981	0.000512093	4.33642e-05	1	1.87476	0.0865367	strong
chr19	1087770	1087770	1	+	rs576990955	C	T	SNV	c(-12, 3)	SOX4	jaspar2018	MA0867.1	MA0867.1	acagaacagtgggcgTgttacagaccaccga	0.649863	0.720074	17.7362	19.6446	0.000539509	7.07253e-05	1	1.9084	0.0700244	strong
chr19	1087770	1087770	1	-	rs576990955	C	T	SNV	c(-7, 3)	SP3	jaspar2018	MA0746.1	MA0746.1	acagtgggcgTgttacagacc	0.87308	0.949446	7.45264	8.08618	0.000439167	4.31538e-05	1	0.633544	0.0744856	weak
chr19	1087770	1087770	1	-	rs576990955	C	T	SNV	c(-8, 3)	SP8	jaspar2018	MA0747.1	MA0747.1	aacagtgggcgTgttacagacca	0.868603	0.961372	8.43265	9.31688	0.000163138	3.75509e-06	1	0.884233	0.0912987	strong
chr20	50142623	50142623	1	-	rs6126249	G	A	SNV	c(-8, 4)	ASCL1	jaspar2018	MA1100.1	MA1100.1	cttcctgcatctGctcagcccgcac	0.886237	0.735062	10.6949	8.89721	8.04216e-05	0.00260785	1	-1.79766	-0.149213	strong
chr6	106442096	106442096	1	-	rs6568423	G	C	SNV	c(-5, 8)	Zfx	jaspar2018	MA0146.2	MA0146.2	gacgccgggaggcCaggggcgaggtaa	0.806938	0.961447	9.33006	11.084	0.00133449	6.1065e-05	1	1.75392	0.152229	strong
chr6	106442096	106442096	1	-	rs6568423	G	C	SNV	c(-5, 8)	Zfx	jaspar2018	MA0146.1	MA0146.1	gacgccgggaggcCaggggcgaggtaa	0.807135	0.961011	9.29012	11.0287	0.00133225	6.13257e-05	1	1.73862	0.15159	strong
chr5	176790162	176790162	1	+	rs67111717	A	G	SNV	c(-10, 3)	PLAG1	jaspar2018	MA0163.1	MA0163.1	cttgcggccgcgcGgggaaaggcttcg	0.715941	0.831935	10.1614	11.7696	0.000924416	3.41199e-05	1	1.60822	0.11406	strong
chr5	176790162	176790162	1	+	rs67111717	A	G	SNV	c(-4, 10)	PRDM1	jaspar2018	MA0508.1	MA0508.1	ccttgcggccgcgcAgggaaaggcttcgt	0.844347	0.746975	11.1794	9.91893	8.71466e-05	0.00108264	1	-1.26049	-0.0955322	strong
chr11	128498760	128498760	1	-	rs7103484	A	G	SNV	c(-8, 5)	GLIS3	jaspar2018	MA0737.1	MA0737.1	aaagtgtttgtggGgtgtaaaattaat	0.674615	0.775277	13.0629	15.0052	0.00133399	9.28678e-05	1	1.94235	0.100424	strong
chr6	33601730	33601730	1	+	rs71565398	C	G	SNV	c(-7, 7)	Klf12	jaspar2018	MA0742.1	MA0742.1	aggtcgcggcctcgCccggtgaggctccc	0.856951	0.726851	12.8197	10.8891	8.65823e-05	0.0019209	1	-1.93061	-0.129203	strong
chr6	33601730	33601730	1	-	rs71565398	C	G	SNV	c(-6, 3)	Klf4	jaspar2018	MA0039.2	MA0039.2	gcggcctcgCccggtgagg	0.947553	0.787945	10.437	8.70008	8.86917e-05	0.00250816	1	-1.73688	-0.157788	strong
chr6	33601730	33601730	1	+	rs71565398	C	G	SNV	c(-9, 7)	SP4	jaspar2018	MA0685.1	MA0685.1	ggaggtcgcggcctcgCccggtgaggctccctc	0.834856	0.721176	14.6419	12.6634	4.77656e-05	0.0010237	1	-1.97848	-0.112953	strong
chr19	1027797	1027797	1	+	rs7253254	A	C	SNV	c(-3, 6)	Myb	jaspar2018	MA0100.2	MA0100.2	gcaggggaaActgcctctg	0.943328	0.818557	11.43	9.92119	8.2016e-05	0.00117588	1	-1.50877	-0.124535	strong
chr1	155099963	155099963	1	-	rs73001391	T	C	SNV	c(-2, 9)	CREB1	jaspar2018	MA0018.1	MA0018.1	ggtgcggggcaCgtcaacaacct	0.807916	0.987048	7.26898	8.84001	0.00168908	1.45435e-05	1	1.57102	0.175463	strong
chr1	155099963	155099963	1	+	rs73001391	T	C	SNV	c(-6, 7)	CREB3	jaspar2018	MA0638.1	MA0638.1	aaggtgcggggcaCgtcaacaacctcg	0.783194	0.929287	10.7871	12.766	0.000803471	1.66297e-05	1	1.97894	0.144197	strong
chr1	155099963	155099963	1	+	rs73001391	T	C	SNV	c(-6, 7)	CREB3L1	jaspar2018	MA0839.1	MA0839.1	aaggtgcggggcaCgtcaacaacctcg	0.736242	0.861789	11.5927	13.5325	0.0008214	2.60361e-05	1	1.93989	0.123811	strong
chr1	155099963	155099963	1	+	rs73001391	T	C	SNV	c(-7, 6)	XBP1	jaspar2018	MA0844.1	MA0844.1	aaggtgcggggcaCgtcaacaacctcg	0.793217	0.93851	10.8984	12.8573	0.000766158	1.50762e-05	1	1.95894	0.143131	strong
chr6	111910689	111910689	1	-	rs73534579	C	T	SNV	c(-8, 5)	Arid5a	jaspar2018	MA0602.1	MA0602.1	ttgaccttgccaaTattcagttctcag	0.811084	0.970992	7.00397	8.33816	0.00197991	4.84437e-05	1	1.33419	0.155496	strong
chr6	91060544	91060544	1	+	rs75210451	G	A	SNV	c(-8, 4)	EOMES	jaspar2018	MA0800.1	MA0800.1	taaacacgtgtgAcacttccctctt	0.77302	0.92848	8.5356	10.2113	0.00195239	5.10663e-05	1	1.67575	0.152586	strong
chr6	91060544	91060544	1	+	rs75210451	G	A	SNV	c(-7, -1)	MGA	jaspar2018	MA0801.1	MA0801.1	acgtgtgAcacttcc	0.779264	0.943731	7.61669	9.20394	0.0027771	7.62939e-05	1	1.58724	0.162844	strong
chr6	91060544	91060544	1	+	rs75210451	G	A	SNV	c(-7, 2)	TBR1	jaspar2018	MA0802.1	MA0802.1	acacgtgtgAcacttccct	0.782343	0.910705	8.79253	10.2079	0.00142097	5.34058e-05	1	1.41541	0.12646	strong
chr6	91060544	91060544	1	+	rs75210451	G	A	SNV	c(-7, -1)	TBX1	jaspar2018	MA0805.1	MA0805.1	acgtgtgAcacttcc	0.77621	0.937773	9.4273	11.3717	0.0015564	3.05176e-05	1	1.94438	0.16042	strong
chr6	91060544	91060544	1	+	rs75210451	G	A	SNV	c(-8, 1)	TBX21	jaspar2018	MA0690.1	MA0690.1	acacgtgtgAcacttccct	0.743872	0.898559	9.24272	11.1367	0.00220871	7.43866e-05	1	1.89399	0.153003	strong
chr6	91060544	91060544	1	+	rs75210451	G	A	SNV	c(-7, -1)	TBX4	jaspar2018	MA0806.1	MA0806.1	acgtgtgAcacttcc	0.844383	0.941153	7.41385	8.24953	0.0010376	7.62939e-05	1	0.835675	0.0954217	strong
chr2	71050210	71050210	1	-	rs7575962	C	T	SNV	c(-6, 4)	Klf1	jaspar2018	MA0493.1	MA0493.1	aggaagggagTggttgcccac	0.842141	0.917614	10.0198	10.9102	0.00049758	6.03199e-05	1	0.890385	0.0749349	strong
chr2	71050210	71050210	1	-	rs7575962	C	T	SNV	c(-10, 4)	Klf12	jaspar2018	MA0742.1	MA0742.1	agacaggaagggagTggttgcccacaccc	0.77161	0.88696	11.5533	13.265	0.000640163	2.86549e-05	1	1.71173	0.114555	strong
chr2	71050210	71050210	1	-	rs7575962	C	T	SNV	c(-7, 3)	SP3	jaspar2018	MA0746.1	MA0746.1	aggaagggagTggttgcccac	0.863105	0.93947	7.36988	8.00342	0.000550985	5.38826e-05	1	0.633544	0.0744856	weak
chr2	71050210	71050210	1	-	rs7575962	C	T	SNV	c(-8, 3)	SP8	jaspar2018	MA0747.1	MA0747.1	caggaagggagTggttgcccaca	0.796965	0.889734	7.74982	8.63406	0.000974	8.76784e-05	1	0.884233	0.0912987	strong
chr19	10726302	10726302	1	+	rs76215286	A	G	SNV	c(-11, 6)	EWSR1-FLI1	jaspar2018	MA0149.1	MA0149.1	tgaggaggaagaggaagAggaaggggaggggttgg	0.674183	0.612106	20.8449	18.935	0.000100449	0.000784743	1	-1.90988	-0.0618702	strong
chr12	6535973	6535973	1	-	rs77407134	C	A	SNV	c(-7, 4)	FOXI1	jaspar2018	MA0042.1	MA0042.1	aacaaaacaaaCaaacaaaaaaa	0.997795	0.948644	9.93377	9.45257	4.76837e-07	6.02007e-05	1	-0.481207	-0.0483365	weak
chr12	6545417	6545417	1	-	rs7980991	C	A	SNV	c(-11, 2)	IRF5	jaspar2018	MA1420.1	MA1420.1	actcctttggtttCgttcccaggttaa	0.864601	0.770493	11.1756	9.98883	1.73226e-05	0.000333119	1	-1.18679	-0.0921197	strong
chr12	6545417	6545417	1	-	rs7980991	C	A	SNV	c(-11, 3)	IRF9	jaspar2018	MA0653.1	MA0653.1	cactcctttggtttCgttcccaggttaac	0.746711	0.668226	17.6437	15.7961	9.19597e-05	0.000821518	1	-1.84764	-0.0782683	strong
chr12	56727705	56727705	1	-	rs80317430	G	A	SNV	c(-3, 7)	NRF1	jaspar2018	MA0506.1	MA0506.1	tagggggagcGcaagcgctgt	0.974235	0.85933	12.3715	10.9141	3.57628e-06	0.00010848	1	-1.45733	-0.114766	strong
chr19	1103865	1103865	1	-	rs8178965	C	T	SNV	c(-9, 8)	EWSR1-FLI1	jaspar2018	MA0149.1	MA0149.1	ccgcccccccttccccgCcttcttcccactccggc	0.728383	0.669079	22.5125	20.6879	1.46143e-05	0.000130172	1	-1.82458	-0.0591068	strong
chr19	1103865	1103865	1	-	rs8178965	C	T	SNV	c(-13, -1)	PLAG1	jaspar2018	MA0163.1	MA0163.1	ccccccttccccgCcttcttcccactc	0.82864	0.739394	11.724	10.4866	3.83221e-05	0.000513263	1	-1.23736	-0.0877575	strong
chr19	1103865	1103865	1	+	rs8178965	C	T	SNV	c(-6, 8)	SP2	jaspar2018	MA0516.1	MA0516.1	cccccccttccccgCcttcttcccactcc	0.910936	0.748045	10.5687	8.70734	5.99734e-05	0.00337504	1	-1.86131	-0.160647	strong
chr19	1103865	1103865	1	-	rs8178965	C	T	SNV	c(-13, 7)	ZNF263	jaspar2018	MA0528.1	MA0528.1	gtcccgcccccccttccccgCcttcttcccactccggcctc	0.829509	0.788688	9.413	8.96667	5.22139e-06	3.49794e-05	1	-0.446327	-0.0395781	weak
chr19	1132637	1132637	1	-	rs879983	A	G	SNV	c(-6, 4)	NFIC	jaspar2018	MA0161.2	MA0161.2	cacgcatgccAagcgcacctc	0.998775	0.85762	9.73302	8.38339	5.126e-05	0.000600576	1	-1.34964	-0.138499	strong
chr6	32632903	32632903	1	+	rs9274413	G	A	SNV	c(-10, 9)	ESR1	jaspar2018	MA0112.2	MA0112.2	ggccgcccccgcagccgccAccctgacccggcctggagc	0.732882	0.820387	7.81013	8.68075	0.000689797	5.59444e-05	1	0.870625	0.0831716	strong
chr5	96212781	96212781	1	-	rs968218	C	T	SNV	c(-6, 2)	NKX2-8	jaspar2018	MA0673.1	MA0673.1	ggttcaagTgattctcg	0.82303	0.984183	6.26839	7.48156	0.00450516	6.48499e-05	1	1.21318	0.159615	strong
chr5	96212781	96212781	1	-	rs968218	C	T	SNV	c(-6, 3)	Srebf1(var.2)	jaspar2018	MA0829.1	MA0829.1	tggttcaagTgattctcgt	0.751114	0.881246	10.221	11.9855	0.00159836	7.82013e-05	1	1.76447	0.129782	strong
chr5	96212781	96212781	1	-	rs968218	C	T	SNV	c(-6, 3)	SREBF2(var.2)	jaspar2018	MA0828.1	MA0828.1	tggttcaagTgattctcgt	0.745522	0.869609	10.5681	12.3238	0.00156212	8.96454e-05	1	1.75569	0.123914	strong
chr17	76165368	76165368	1	+	rs9908349	C	T	SNV	c(-10, 3)	CTCFL	jaspar2018	MA1102.1	MA1102.1	ggcggggagggggCctgttcttggaca	0.869954	0.727908	11.0942	9.33312	7.03521e-05	0.00195242	1	-1.76105	-0.138595	strong
chr10	82290663	82290663	1	-	rs1007521	C	T	SNV	c(-1, 8)	Esrrg	jaspar2018	MA0643.1	MA0643.1	ggtgggccaTaaccttggg	0.788351	0.888792	9.53015	10.7343	0.00129032	7.43866e-05	1	1.20414	0.0997834	strong
chr5	35877841	35877841	1	+	rs10491435	G	T	SNV	c(-4, 6)	ELF5	jaspar2018	MA0136.2	MA0136.2	gaagatatacGgaagagacgt	0.954749	0.7392	8.59959	6.68985	8.15392e-05	0.00893164	1	-1.90974	-0.212182	strong
chr2	204628810	204628810	1	+	rs10932019	G	A	SNV	c(-4, 16)	REST	jaspar2018	MA0138.2	MA0138.2	ttgggaggatatgagtgcacGcacataggacagtacatctg	0.746388	0.671546	15.3023	13.8114	7.36693e-05	0.000674533	1	-1.4909	-0.0732468	strong
chr8	129180309	129180309	1	+	rs36099148	C	T	SNV	c(1, 7)	EHF	jaspar2018	MA0598.1	MA0598.1	catgctcCcttcctc	0.9993	0.960334	12.9479	12.4431	1.52588e-05	0.00012207	1	-0.504788	-0.0389589	weak
chr8	129180309	129180309	1	-	rs36099148	C	T	SNV	c(-12, 5)	EWSR1-FLI1	jaspar2018	MA0149.1	MA0149.1	cactgtgctccatgctcCcttcctcttctctccct	0.686382	0.633158	21.2203	19.5827	5.09449e-05	0.000301343	1	-1.63752	-0.053047	strong
chr8	129180309	129180309	1	-	rs36099148	C	T	SNV	c(1, 9)	Klf4	jaspar2018	MA0039.1	MA0039.1	tccatgctcCcttcctctt	0.953707	0.802491	4.44952	3.7752	2.86102e-05	0.00387955	1	-0.674313	-0.144828	weak
chr22	21922456	21922456	1	+	rs11089620	C	G	SNV	c(-12, 6)	CTCF	jaspar2018	MA0139.1	MA0139.1	gagcccctgcccggagccGgcgccgcggaaccgcccc	0.699998	0.831713	9.70912	11.4864	0.00264225	8.20173e-05	1	1.77731	0.129191	strong
chr2	102758967	102758967	1	-	rs113898864	G	A	SNV	c(-1, 12)	Zfx	jaspar2018	MA0146.1	MA0146.1	ccctggaggagccAggccgcgactcga	0.790222	0.960518	9.09901	11.0232	0.00210755	6.29574e-05	1	1.92416	0.167766	strong
chr2	102758967	102758967	1	-	rs113898864	G	A	SNV	c(-1, 12)	Zfx	jaspar2018	MA0146.2	MA0146.2	ccctggaggagccAggccgcgactcga	0.788999	0.960689	9.12642	11.0754	0.00217701	6.36876e-05	1	1.94897	0.169157	strong
chr15	75073396	75073396	1	-	rs117001954	C	T	SNV	c(-12, 2)	TP53	jaspar2018	MA0106.2	MA0106.2	gtcatgcctgagcaTgctgtcctctcctg	0.881578	0.936235	12.4158	13.1732	6.72881e-06	2.8871e-07	1	0.757377	0.0538799	strong
chr15	75073396	75073396	1	+	rs117001954	C	T	SNV	c(-17, 2)	TP53	jaspar2018	MA0106.1	MA0106.1	cccctgtcatgcctgagcaTgctgtcctctcctgtggct	0.731604	0.788852	13.7624	14.8049	5.64672e-05	6.07182e-06	1	1.04247	0.0558973	strong
chr15	75073396	75073396	1	+	rs117001954	C	T	SNV	c(-14, 3)	TP53	jaspar2018	MA0106.3	MA0106.3	cctgtcatgcctgagcaTgctgtcctctcctgtgg	0.80616	0.873865	14.1442	15.3131	2.96003e-05	1.86302e-06	1	1.16893	0.0668308	strong
chr19	10726306	10726306	1	-	rs117707627	A	G	SNV	c(-3, 10)	EGR1	jaspar2018	MA0162.2	MA0162.2	aagaggaagaggaGggggaggggttgg	0.813903	0.962964	9.6075	11.3481	0.000579018	3.09199e-06	1	1.74058	0.14775	strong
chr19	10726306	10726306	1	-	rs117707627	A	G	SNV	c(-5, 2)	EHF	jaspar2018	MA0598.1	MA0598.1	aagaggaAggggagg	0.9993	0.845586	12.9479	10.9566	1.52588e-05	0.000518799	1	-1.99129	-0.153685	strong
chr19	10726306	10726306	1	+	rs117707627	A	G	SNV	c(-6, 4)	Erg	jaspar2018	MA0474.1	MA0474.1	aggaagaggaAggggaggggt	0.967379	0.805158	11.4791	9.56944	2.74181e-05	0.00151682	1	-1.90969	-0.160976	strong
chr19	10726306	10726306	1	-	rs117707627	A	G	SNV	c(-9, 5)	Ets1	jaspar2018	MA0098.2	MA0098.2	gaagaggaagaggaAggggaggggttggt	0.918464	0.82387	10.764	9.67329	4.83701e-05	0.000690098	1	-1.09075	-0.0931928	strong
chr19	10726306	10726306	1	+	rs117707627	A	G	SNV	c(-15, 2)	EWSR1-FLI1	jaspar2018	MA0149.1	MA0149.1	gaggaagaggaagaggaAggggaggggttggtctt	0.674183	0.620959	20.8449	19.2074	0.000100449	0.000525935	1	-1.63752	-0.053047	strong
chr19	10726306	10726306	1	+	rs117707627	A	G	SNV	c(-6, 4)	FLI1	jaspar2018	MA0475.1	MA0475.1	aggaagaggaAggggaggggt	0.916076	0.767829	10.5129	8.82873	9.01222e-05	0.00284266	1	-1.68416	-0.146879	strong
chr19	10726306	10726306	1	-	rs117707627	A	G	SNV	c(1, 10)	KLF16	jaspar2018	MA0741.1	MA0741.1	aggaagaggaGggggaggggt	0.875994	0.936364	10.0059	10.6872	0.0001688	2.09808e-05	1	0.681274	0.0597329	weak
chr19	10726306	10726306	1	+	rs117707627	A	G	SNV	c(-3, 6)	MZF1(var.2)	jaspar2018	MA0057.1	MA0057.1	ggaagaggaGggggagggg	0.919077	0.991118	5.56246	5.9852	0.000610352	5.72205e-06	1	0.422745	0.0700218	weak
chr19	10726306	10726306	1	+	rs117707627	A	G	SNV	c(-10, 4)	Spi1	jaspar2018	MA0080.3	MA0080.3	gaagaggaagaggaAggggaggggttggt	0.928098	0.758158	11.1143	9.11456	6.04615e-06	0.0020862	1	-1.99974	-0.167197	strong
chr19	10726306	10726306	1	+	rs117707627	A	G	SNV	c(-10, 3)	SPIC	jaspar2018	MA0687.1	MA0687.1	aagaggaagaggaAggggaggggttgg	0.861824	0.795113	9.26732	8.56713	7.44388e-05	0.000484001	1	-0.700192	-0.065331	strong
chr15	75165751	75165751	1	+	rs11857695	G	T	SNV	c(-6, 1)	Atf1	jaspar2018	MA0604.1	MA0604.1	tatgacgTcaccggg	0.914732	0.980303	8.72132	9.34158	0.000747681	7.62939e-05	1	0.62026	0.0650993	weak
chr15	75165751	75165751	1	+	rs11857695	G	T	SNV	c(-7, -1)	Atf3	jaspar2018	MA0605.1	MA0605.1	tatgacgTcaccggg	0.921518	0.962849	9.67463	10.105	0.000244141	4.57764e-05	1	0.430325	0.0410155	weak
chr15	75165751	75165751	1	+	rs11857695	G	T	SNV	c(-8, 5)	ATF7	jaspar2018	MA0834.1	MA0834.1	tggccctatgacgTcaccggggtcgct	0.852483	0.9712	13.8374	15.7566	6.92792e-05	1.02818e-06	1	1.91913	0.118303	strong
chr15	75165751	75165751	1	+	rs11857695	G	T	SNV	c(-8, 5)	BATF3	jaspar2018	MA0835.1	MA0835.1	tggccctatgacgTcaccggggtcgct	0.752552	0.841035	16.6898	18.6373	0.000103381	5.49108e-06	1	1.94746	0.0879771	strong
chr15	75165751	75165751	1	-	rs11857695	G	T	SNV	c(-4, 7)	CREB1	jaspar2018	MA0018.1	MA0018.1	gccctatgacgTcaccggggtcg	0.891703	0.989294	8.00381	8.8597	0.000817895	1.01328e-05	1	0.855892	0.095592	strong
chr15	75165751	75165751	1	+	rs11857695	G	T	SNV	c(-7, 4)	CREB1	jaspar2018	MA0018.3	MA0018.3	gccctatgacgTcaccggggtcg	0.856382	0.998978	9.05326	10.5236	0.000296712	1.07288e-06	1	1.47037	0.139581	strong
chr15	75165751	75165751	1	+	rs11857695	G	T	SNV	c(-7, 4)	Creb5	jaspar2018	MA0840.1	MA0840.1	gccctatgacgTcaccggggtcg	0.870765	0.999645	13.0421	14.9661	7.28369e-05	2.38419e-07	1	1.92403	0.128514	strong
chr15	75165751	75165751	1	+	rs11857695	G	T	SNV	c(-7, 2)	Crem	jaspar2018	MA0609.1	MA0609.1	cctatgacgTcaccggggt	0.81578	0.990408	9.41603	11.404	0.00120544	1.52588e-05	1	1.98797	0.172669	strong
chr15	75165751	75165751	1	-	rs11857695	G	T	SNV	c(-11, 4)	FOS::JUN(var.2)	jaspar2018	MA1126.1	MA1126.1	cgtggccctatgacgTcaccggggtcgctcc	0.891166	0.969936	7.16749	7.76567	3.52412e-05	1.17859e-06	1	0.598173	0.074828	weak
chr15	75165751	75165751	1	-	rs11857695	G	T	SNV	c(-6, 4)	FOSB::JUN	jaspar2018	MA1127.1	MA1127.1	ccctatgacgTcaccggggtc	0.854949	0.976211	9.56305	10.8852	0.000116587	1.43051e-06	1	1.32215	0.118636	strong
chr15	75165751	75165751	1	-	rs11857695	G	T	SNV	c(-6, 3)	FOSB::JUNB(var.2)	jaspar2018	MA1136.1	MA1136.1	cctatgacgTcaccggggt	0.871833	0.985315	8.02443	9.04071	7.82013e-05	9.53674e-07	1	1.01628	0.1108	strong
chr15	75165751	75165751	1	-	rs11857695	G	T	SNV	c(-6, 3)	FOSL1::JUN(var.2)	jaspar2018	MA1129.1	MA1129.1	cctatgacgTcaccggggt	0.859931	0.968687	7.16407	8.03675	0.000132561	9.53674e-07	1	0.872678	0.105294	strong
chr15	75165751	75165751	1	+	rs11857695	G	T	SNV	c(-7, 3)	FOSL2::JUN(var.2)	jaspar2018	MA1131.1	MA1131.1	ccctatgacgTcaccggggtc	0.865972	0.981447	9.93232	11.236	0.000127554	1.43051e-06	1	1.3037	0.113905	strong
chr15	75165751	75165751	1	-	rs11857695	G	T	SNV	c(-7, 4)	FOSL2::JUNB(var.2)	jaspar2018	MA1139.1	MA1139.1	gccctatgacgTcaccggggtcg	0.833308	0.978411	9.96693	11.6755	0.000269473	1.07288e-06	1	1.70859	0.143221	strong
chr15	75165751	75165751	1	+	rs11857695	G	T	SNV	c(-8, 6)	FOSL2::JUND(var.2)	jaspar2018	MA1145.1	MA1145.1	gtggccctatgacgTcaccggggtcgctc	0.851138	0.985415	9.73853	11.2427	0.000190614	1.28802e-06	1	1.50421	0.131877	strong
chr15	75165751	75165751	1	+	rs11857695	G	T	SNV	c(-7, 4)	JDP2(var.2)	jaspar2018	MA0656.1	MA0656.1	gccctatgacgTcaccggggtcg	0.876586	0.9969	14.4324	16.4053	5.1856e-05	4.17233e-07	1	1.97291	0.119889	strong
chr15	75165751	75165751	1	+	rs11857695	G	T	SNV	c(-9, 3)	JUN	jaspar2018	MA0488.1	MA0488.1	ggccctatgacgTcaccggggtcgc	0.861283	0.925281	11.6425	12.5036	0.000187412	2.13981e-05	1	0.861042	0.063739	strong
chr15	75165751	75165751	1	-	rs11857695	G	T	SNV	c(-7, 4)	JUN::JUNB(var.2)	jaspar2018	MA1133.1	MA1133.1	gccctatgacgTcaccggggtcg	0.910298	0.99607	8.18663	8.92865	2.61068e-05	4.17233e-07	1	0.742021	0.0827905	strong
chr15	75165751	75165751	1	-	rs11857695	G	T	SNV	c(-6, 3)	JUNB(var.2)	jaspar2018	MA1140.1	MA1140.1	cctatgacgTcaccggggt	0.848457	0.98763	6.22332	7.1956	0.00032711	9.53674e-07	1	0.972284	0.133519	strong
chr15	75165751	75165751	1	-	rs11857695	G	T	SNV	c(-7, 7)	JUND(var.2)	jaspar2018	MA0492.1	MA0492.1	gtggccctatgacgTcaccggggtcgctc	0.831677	0.94404	10.8981	12.3605	0.000408772	8.25245e-06	1	1.46244	0.111732	strong
chr15	75165751	75165751	1	-	rs11857695	G	T	SNV	c(-16, 1)	RARA	jaspar2018	MA0729.1	MA0729.1	ggcgtggccctatgacgTcaccggggtcgctccgc	0.670967	0.729687	17.3603	18.8762	0.000451736	7.45119e-05	1	1.51592	0.0586323	strong
chr1	172795236	172795236	1	+	rs12142778	T	C	SNV	c(-4, 10)	NR1A4::RXRA	jaspar2018	MA1146.1	MA1146.1	agggtttctaaagtTctttgagctgtgga	0.814845	0.725711	8.09106	7.24235	7.14893e-05	0.000952316	1	-0.848705	-0.0861277	strong
chr1	172795236	172795236	1	-	rs12142778	T	C	SNV	c(-5, 11)	NR1H2::RXRA	jaspar2018	MA0115.1	MA0115.1	agagggtttctaaagtCctttgagctgtggaat	0.654962	0.73022	15.0718	16.7696	0.000719766	8.06045e-05	1	1.6978	0.0742833	strong
chr17	40539825	40539825	1	+	rs3736164	T	G	SNV	c(-6, 1)	Atoh1	jaspar2018	MA0461.1	MA0461.1	acagctgGctcctga	0.827919	0.991621	10.1061	12.1042	0.00108337	1.52588e-05	1	1.99815	0.163696	strong
chr17	40539825	40539825	1	-	rs3736164	T	G	SNV	c(-8, 1)	MSC	jaspar2018	MA0665.1	MA0665.1	gcacagctgTctcctgaag	0.889956	0.82976	11.5432	10.7673	2.76566e-05	0.000177383	1	-0.775923	-0.0598628	strong
chr17	40539825	40539825	1	+	rs3736164	T	G	SNV	c(-8, 1)	MYF6	jaspar2018	MA0667.1	MA0667.1	gcacagctgTctcctgaag	0.888697	0.780818	11.7459	10.3279	6.00815e-05	0.000915527	1	-1.41802	-0.107353	strong
chr17	40539825	40539825	1	-	rs3736164	T	G	SNV	c(-10, 3)	Tcf21	jaspar2018	MA0832.1	MA0832.1	aagggcacagctgTctcctgaaggagc	0.866964	0.803411	14.4823	13.4282	3.60608e-05	0.000235371	1	-1.0541	-0.0631619	strong
chr17	40539825	40539825	1	-	rs3736164	T	G	SNV	c(-9, 3)	ZBTB18	jaspar2018	MA0698.1	MA0698.1	agggcacagctgGctcctgaaggag	0.861211	0.892559	12.164	12.6029	0.000117078	6.77109e-05	1	0.438885	0.031111	weak
chr2	102744015	102744015	1	+	rs12470623	A	T	SNV	c(-7, 9)	Alx1	jaspar2018	MA0854.1	MA0854.1	agggggtagacagttaAttaacaagaacaagaa	0.961431	0.807747	10.9409	9.2285	1.92535e-05	0.00118041	1	-1.71238	-0.150596	strong
chr2	102744015	102744015	1	-	rs12470623	A	T	SNV	c(-8, 8)	Alx4	jaspar2018	MA0853.1	MA0853.1	agggggtagacagttaAttaacaagaacaagaa	0.978788	0.824544	11.0842	9.37115	2.94525e-06	0.000548537	1	-1.71303	-0.151331	strong
chr2	102744015	102744015	1	-	rs12470623	A	T	SNV	c(-7, 9)	Arx	jaspar2018	MA0874.1	MA0874.1	agggggtagacagttaAttaacaagaacaagaa	0.951364	0.798662	10.9487	9.23392	1.14215e-05	0.00116322	1	-1.71474	-0.149175	strong
chr2	102744015	102744015	1	+	rs12470623	A	T	SNV	c(-4, 5)	EMX2	jaspar2018	MA0886.1	MA0886.1	agacagttaAttaacaaga	0.993366	0.780216	9.38686	7.38723	6.96182e-05	0.00562191	1	-1.99963	-0.211622	strong
chr2	102744015	102744015	1	+	rs12470623	A	T	SNV	c(-6, 9)	Hoxb5	jaspar2018	MA0904.1	MA0904.1	gggggtagacagttaAttaacaagaacaaga	0.94903	0.781085	9.95895	8.24593	2.49487e-05	0.00204216	1	-1.71303	-0.163475	strong
chr2	102744015	102744015	1	+	rs12470623	A	T	SNV	c(-4, 5)	LHX2	jaspar2018	MA0700.1	MA0700.1	agacagttaAttaacaaga	0.952155	0.733112	8.71601	6.73313	6.19888e-05	0.00839615	1	-1.98288	-0.216729	strong
chr2	102744015	102744015	1	-	rs12470623	A	T	SNV	c(-9, 3)	Lhx3	jaspar2018	MA0135.1	MA0135.1	ggtagacagttaAttaacaagaaca	0.873564	0.763803	10.5548	9.25217	6.02305e-05	0.00100859	1	-1.30265	-0.108056	strong
chr2	102744015	102744015	1	+	rs12470623	A	T	SNV	c(-3, 4)	Lhx4	jaspar2018	MA0704.1	MA0704.1	acagttaAttaacaa	1	0.78386	7.20208	5.66793	0	0.00701904	1	-1.53415	-0.213015	strong
chr2	102744015	102744015	1	+	rs12470623	A	T	SNV	c(-4, 5)	LHX6	jaspar2018	MA0658.1	MA0658.1	agacagttaAttaacaaga	0.979871	0.796719	9.55529	7.78376	6.29425e-05	0.00326061	1	-1.77153	-0.181696	strong
chr2	102744015	102744015	1	+	rs12470623	A	T	SNV	c(-3, 4)	Lhx8	jaspar2018	MA0705.1	MA0705.1	acagttaAttaacaa	0.985767	0.772823	7.26478	5.70398	9.15527e-05	0.0139618	1	-1.5608	-0.211803	strong
chr2	102744015	102744015	1	+	rs12470623	A	T	SNV	c(-3, 4)	LMX1A	jaspar2018	MA0702.1	MA0702.1	acagttaAttaacaa	1	0.797071	6.71074	5.38894	0	0.0040741	1	-1.3218	-0.196967	strong
chr2	102744015	102744015	1	+	rs12470623	A	T	SNV	c(-3, 4)	LMX1B	jaspar2018	MA0703.1	MA0703.1	acagttaAttaacaa	1	0.894795	5.57135	5.00319	0	0.00238037	1	-0.568154	-0.101978	weak
chr2	102744015	102744015	1	+	rs12470623	A	T	SNV	c(-4, 5)	MNX1	jaspar2018	MA0707.1	MA0707.1	agacagttaAttaacaaga	0.996	0.827557	7.26477	6.05052	1.90735e-05	0.00481129	1	-1.21425	-0.166481	strong
chr2	102744015	102744015	1	+	rs12470623	A	T	SNV	c(-3, 7)	NFIL3	jaspar2018	MA0025.1	MA0025.1	tagacagttaTttaacaagaa	0.832621	0.885549	9.172	9.74546	0.00055933	8.2016e-05	1	0.573461	0.0522016	weak
chr2	102744015	102744015	1	+	rs12470623	A	T	SNV	c(-3, 4)	NKX6-1	jaspar2018	MA0674.1	MA0674.1	acagttaAttaacaa	0.99874	0.839751	7.9844	6.72371	4.57764e-05	0.00263977	1	-1.26068	-0.157696	strong
chr2	102744015	102744015	1	+	rs12470623	A	T	SNV	c(-3, 4)	NKX6-2	jaspar2018	MA0675.1	MA0675.1	acagttaAttaacaa	0.999414	0.82697	6.01063	4.99686	3.05176e-05	0.0096283	1	-1.01376	-0.168565	strong
chr2	102744015	102744015	1	+	rs12470623	A	T	SNV	c(-4, 5)	NOTO	jaspar2018	MA0710.1	MA0710.1	agacagttaAttaacaaga	0.974133	0.743765	8.15105	6.23902	6.38962e-05	0.0126057	1	-1.91204	-0.228556	strong
chr2	102744015	102744015	1	+	rs12470623	A	T	SNV	c(-4, 5)	POU6F1	jaspar2018	MA0628.1	MA0628.1	agacagttaAttaacaaga	0.982575	0.818441	8.86012	7.40978	9.91821e-05	0.0025177	1	-1.45034	-0.160897	strong
chr2	102744015	102744015	1	+	rs12470623	A	T	SNV	c(-3, 4)	VAX2	jaspar2018	MA0723.1	MA0723.1	acagttaAttaacaa	0.991464	0.81953	5.90641	4.90589	0.000106812	0.00494385	1	-1.00051	-0.167982	strong
chr17	73400627	73400627	1	+	rs12943902	G	C	SNV	c(-2, 8)	Egr1	jaspar2018	MA0162.1	MA0162.1	gaaaaaaaggCgggggtgggg	0.804992	0.903382	8.10634	9.07257	0.00074172	5.05447e-05	1	0.966229	0.0964166	strong
chr17	73400627	73400627	1	-	rs12943902	G	C	SNV	c(-6, 7)	GLIS2	jaspar2018	MA0736.1	MA0736.1	ttagaaaaaaaggGgggggtgggggga	0.856911	0.81967	12.7733	12.2223	4.87417e-05	0.000146013	1	-0.550971	-0.0370021	weak
chr17	73400627	73400627	1	-	rs12943902	G	C	SNV	c(-3, 6)	KLF5	jaspar2018	MA0599.1	MA0599.1	aaaaaaaggGgggggtggg	0.968452	0.921172	11.1202	10.579	5.43594e-05	0.000195503	1	-0.541218	-0.0471389	weak
chr17	73400627	73400627	1	+	rs12943902	G	C	SNV	c(-1, 12)	PLAG1	jaspar2018	MA0163.1	MA0163.1	ttagaaaaaaaggGgggggtgggggga	0.852744	0.80425	12.0581	11.3858	1.65142e-05	8.36588e-05	1	-0.672345	-0.0476848	weak
chr17	73400627	73400627	1	+	rs12943902	G	C	SNV	c(-3, 6)	SP1	jaspar2018	MA0079.1	MA0079.1	aaaaaaaggGgggggtggg	0.953288	0.865854	5.03551	4.59568	6.00815e-05	0.00132942	1	-0.439833	-0.083452	weak
chr17	73400627	73400627	1	-	rs12943902	G	C	SNV	c(-3, 6)	ZNF740	jaspar2018	MA0753.1	MA0753.1	aaaaaaaggGgggggtggg	0.947515	0.846951	10.6689	9.55152	2.86102e-05	0.000352859	1	-1.11736	-0.099303	strong
chr15	75073499	75073499	1	-	rs141856776	G	A	SNV	c(-5, 15)	MAFG	jaspar2018	MA0659.1	MA0659.1	ctcctcacgtgccagctactGcatactaagcactttaaacg	0.833472	0.706418	11.1191	9.48154	2.32361e-05	0.00105199	1	-1.63757	-0.123446	strong
chr15	75073499	75073499	1	+	rs141856776	G	A	SNV	c(-4, 14)	MAFK	jaspar2018	MA0496.2	MA0496.2	cctcacgtgccagctactGcatactaagcactttaaa	0.769071	0.684618	10.6502	9.5342	8.49853e-05	0.000925277	1	-1.11596	-0.0814468	strong
chr1	172795496	172795496	1	-	rs147879710	C	G	SNV	c(-14, 2)	Ar	jaspar2018	MA0007.3	MA0007.3	atagaaacataatgttCctgtacacaaagtagt	0.863675	0.743837	14.2419	12.2899	3.90849e-05	0.000937187	1	-1.95192	-0.118569	strong
chr1	172795496	172795496	1	-	rs147879710	C	G	SNV	c(-12, 2)	AR	jaspar2018	MA0007.2	MA0007.2	agaaacataatgttCctgtacacaaagta	0.962288	0.856919	11.0075	9.82034	9.23499e-06	0.000678031	1	-1.18719	-0.103844	strong
chr1	172795496	172795496	1	+	rs147879710	C	G	SNV	c(-13, 1)	NR3C1	jaspar2018	MA0113.2	MA0113.2	agaaacataatgttCctgtacacaaagta	0.902534	0.792898	10.4369	9.1762	2.80021e-05	0.000827518	1	-1.26069	-0.109078	strong
chr1	172795496	172795496	1	-	rs147879710	C	G	SNV	c(-14, 2)	NR3C1	jaspar2018	MA0113.3	MA0113.3	atagaaacataatgttCctgtacacaaagtagt	0.882211	0.767619	15.1872	13.2303	1.80255e-05	0.000445246	1	-1.95688	-0.113781	strong
chr1	172795496	172795496	1	+	rs147879710	C	G	SNV	c(-14, 2)	NR3C2	jaspar2018	MA0727.1	MA0727.1	atagaaacataatgttCctgtacacaaagtagt	0.881269	0.766037	15.1712	13.2047	1.83177e-05	0.0004508	1	-1.9665	-0.114349	strong
chr15	75063573	75063573	1	+	rs1543927	T	C	SNV	c(-12, 2)	HNF4A	jaspar2018	MA0114.2	MA0114.2	ccttgagctctgtgCtgtggccaccagga	0.81785	0.880342	9.52867	10.2432	0.000414967	8.31252e-05	1	0.714497	0.0615349	strong
chr11	35294186	35294186	1	+	rs3794102	A	G	SNV	c(-3, 4)	Dux	jaspar2018	MA0611.1	MA0611.1	tctcacaAtcatccc	0.992448	0.817181	11.274	9.28608	0.00012207	0.00280762	1	-1.98797	-0.175001	strong
chr10	64397538	64397538	1	+	rs16917546	T	C	SNV	c(-1, 13)	TP53	jaspar2018	MA0106.2	MA0106.2	accccattctgggaCatggtgagacatgt	0.790444	0.909885	11.1529	12.808	0.000223318	1.49943e-06	1	1.6551	0.117744	strong
chr10	64397538	64397538	1	-	rs16917546	T	C	SNV	c(-2, 15)	TP53	jaspar2018	MA0106.3	MA0106.3	aaaaccccattctgggaCatggtgagacatgtcgg	0.805868	0.903108	14.1391	15.818	2.99076e-05	4.32541e-07	1	1.67888	0.095986	strong
chr10	64397538	64397538	1	+	rs16917546	T	C	SNV	c(-5, 14)	TP53	jaspar2018	MA0106.1	MA0106.1	aaaaaaccccattctgggaCatggtgagacatgtcggtt	0.708393	0.752862	13.3397	14.1495	0.000126548	2.57547e-05	1	0.809764	0.0434194	strong
chr10	64397538	64397538	1	+	rs16917546	T	C	SNV	c(-2, 15)	TP63	jaspar2018	MA0525.2	MA0525.2	aaaaccccattctgggaCatggtgagacatgtcgg	0.812689	0.904998	17.6365	19.6331	1.08329e-05	1.83805e-07	1	1.99663	0.0920614	strong
chr10	64397538	64397538	1	+	rs16917546	T	C	SNV	c(-3, 16)	TP63	jaspar2018	MA0525.1	MA0525.1	aaaaaaccccattctgggaCatggtgagacatgtcggtt	0.77285	0.915329	8.54866	10.0696	0.00312951	2.66832e-05	1	1.52091	0.1386	strong
chr10	64397538	64397538	1	-	rs16917546	T	C	SNV	c(-2, 15)	TP73	jaspar2018	MA0861.1	MA0861.1	aaaaccccattctgggaCatggtgagacatgtcgg	0.796775	0.923307	11.6746	13.499	0.000314905	2.78198e-06	1	1.82436	0.124916	strong
chr10	64397538	64397538	1	-	rs16917546	T	C	SNV	c(-13, 3)	ZNF410	jaspar2018	MA0752.1	MA0752.1	aaaccccattctgggaTatggtgagacatgtcg	0.759184	0.674386	17.742	15.7694	7.52971e-05	0.000822241	1	-1.97255	-0.0845001	strong
chr1	8021740	8021740	1	-	rs17523802	G	A	SNV	c(-4, 3)	EHF	jaspar2018	MA0598.1	MA0598.1	gctgaggAaggccgg	0.845586	0.9993	10.9566	12.9479	0.000518799	1.52588e-05	1	1.99129	0.153685	strong
chr1	8021740	8021740	1	+	rs17523802	G	A	SNV	c(-2, 15)	EWSR1-FLI1	jaspar2018	MA0149.1	MA0149.1	gcagtgtggggctgaggAaggccggacggcgcgcg	0.621089	0.679823	19.2114	21.0184	0.000522428	7.25767e-05	1	1.80704	0.0585385	strong
chr1	8021740	8021740	1	+	rs17523802	G	A	SNV	c(-10, 3)	PLAG1	jaspar2018	MA0163.1	MA0163.1	tgtggggctgaggGaggccggacggcg	0.800709	0.684715	11.3367	9.72848	9.28603e-05	0.00190737	1	-1.60822	-0.11406	strong
chr8	129555928	129555928	1	-	rs17807904	G	A	SNV	c(-8, 5)	Zfx	jaspar2018	MA0146.2	MA0146.2	tgggtgaggccacGgcgtggaaacatt	0.982765	0.933563	11.326	10.7675	9.41381e-06	0.00019028	1	-0.558524	-0.0484761	weak
chr8	129555928	129555928	1	-	rs17807904	G	A	SNV	c(-8, 5)	Zfx	jaspar2018	MA0146.1	MA0146.1	tgggtgaggccacGgcgtggaaacatt	0.982696	0.932705	11.2738	10.7089	9.46596e-06	0.000192072	1	-0.564841	-0.0492482	weak
chr12	68436205	68436205	1	+	rs182863055	T	A	SNV	c(-14, -1)	CENPB	jaspar2018	MA0637.1	MA0637.1	cccgaggacagcgaAgttcaagtgaacat	0.752569	0.858648	9.13833	10.4064	0.00131515	9.74666e-05	1	1.26806	0.104832	strong
chr12	68436205	68436205	1	+	rs182863055	T	A	SNV	c(-11, 5)	Rarg(var.2)	jaspar2018	MA0860.1	MA0860.1	aacccgaggacagcgaAgttcaagtgaacatgt	0.757175	0.799222	18.0701	19.0669	6.63055e-05	1.62325e-05	1	0.996853	0.041837	strong
chr15	75074527	75074527	1	-	rs186442904	C	T	SNV	c(-4, 6)	E2F1	jaspar2018	MA0024.2	MA0024.2	tgccgccctcCcgctcctgcc	0.9718	0.904416	10.7289	9.98539	1.45435e-05	0.000358105	1	-0.743474	-0.0673436	strong
chr15	75074527	75074527	1	+	rs186442904	C	T	SNV	c(-3, 11)	E2F3	jaspar2018	MA0469.1	MA0469.1	ccgctgccgccctcCcgctcctgccccac	0.947125	0.837702	12.2337	10.8382	3.73013e-05	0.000476774	1	-1.39543	-0.108107	strong
chr15	75074527	75074527	1	-	rs186442904	C	T	SNV	c(-5, 5)	E2F6	jaspar2018	MA0471.1	MA0471.1	tgccgccctcCcgctcctgcc	0.944914	0.810876	11.3006	9.70309	7.77245e-05	0.0012567	1	-1.59755	-0.133606	strong
chr12	68434370	68434370	1	+	rs188151450	T	C	SNV	c(-4, 9)	E2F7	jaspar2018	MA0758.1	MA0758.1	aacttttttttttCcccccaagcataa	0.732329	0.816791	17.0745	19.0386	0.000239711	1.86823e-05	1	1.96405	0.0842981	strong
chr12	68434370	68434370	1	+	rs188151450	T	C	SNV	c(-3, 8)	E2F8	jaspar2018	MA0865.1	MA0865.1	cttttttttttCcccccaagcat	0.775728	0.8687	15.234	17.0491	7.09891e-05	2.38419e-06	1	1.81507	0.0925471	strong
chr5	35808115	35808115	1	-	rs1908369	G	A	SNV	c(-10, 4)	Bach1::Mafk	jaspar2018	MA0591.1	MA0591.1	gtgtttgctgagttAaaaataaaagcgct	0.760301	0.865297	12.3024	13.9788	0.000428283	2.52966e-05	1	1.67635	0.103931	strong
chr5	35808115	35808115	1	-	rs1908369	G	A	SNV	c(-11, 2)	BACH2	jaspar2018	MA1101.1	MA1101.1	tgtttgctgagttAaaaataaaagcgc	0.736822	0.873862	9.7275	11.4875	0.00131464	4.59328e-05	1	1.75998	0.134273	strong
chr5	35808115	35808115	1	-	rs1908369	G	A	SNV	c(-5, 15)	IRF1	jaspar2018	MA0050.2	MA0050.2	tacaaagtgtttgctgagttGaaaataaaagcgctttcact	0.855031	0.818982	13.2002	12.6566	4.12339e-05	0.000102948	1	-0.543578	-0.0353291	weak
chr5	35808115	35808115	1	-	rs1908369	G	A	SNV	c(-13, 1)	MAF::NFE2	jaspar2018	MA0501.1	MA0501.1	gtgtttgctgagttAaaaataaaagcgct	0.693866	0.821167	10.9998	12.9887	0.002034	8.72314e-05	1	1.98887	0.126016	strong
chr5	35808115	35808115	1	+	rs1908369	G	A	SNV	c(-13, 7)	MAFF	jaspar2018	MA0495.2	MA0495.2	tacaaagtgtttgctgagttAaaaataaaagcgctttcact	0.68145	0.786365	9.14737	10.459	0.000923043	4.16806e-05	1	1.31162	0.0998965	strong
chr5	35808115	35808115	1	+	rs1908369	G	A	SNV	c(-3, 8)	MEF2A	jaspar2018	MA0052.3	MA0052.3	tttgctgagttAaaaataaaagc	0.738966	0.862776	11.4532	13.3635	0.00121683	5.96046e-05	1	1.91025	0.123396	strong
chr5	35808115	35808115	1	+	rs1908369	G	A	SNV	c(-4, 10)	MEF2A	jaspar2018	MA0052.2	MA0052.2	gtgtttgctgagttAaaaataaaagcgct	0.807742	0.892074	10.3873	11.4569	0.000401024	3.5475e-05	1	1.06962	0.0833961	strong
chr5	35808115	35808115	1	+	rs1908369	G	A	SNV	c(-5, 9)	MEF2C	jaspar2018	MA0497.1	MA0497.1	gtgtttgctgagttAaaaataaaagcgct	0.882505	0.929221	10.4189	10.9626	0.000117027	1.93343e-05	1	0.543777	0.0461355	weak
chr6	167402536	167402536	1	+	rs1951459	G	A	SNV	c(-1, 9)	ETV2	jaspar2018	MA0762.1	MA0762.1	ctccctctgtAccggagatgc	0.761218	0.887675	10.1153	11.7834	0.00144529	7.53403e-05	1	1.6681	0.125752	strong
chr19	1095030	1095030	1	+	rs2074444	C	T	SNV	c(-10, 3)	EGR1	jaspar2018	MA0162.2	MA0162.2	agccgcccacccaCccctaagcaccgc	0.913469	0.764408	10.7701	9.02955	2.87294e-05	0.00163294	1	-1.74058	-0.14775	strong
chr19	1095030	1095030	1	+	rs2074444	C	T	SNV	c(-6, 7)	GLIS3	jaspar2018	MA0737.1	MA0737.1	agccgcccacccaCccctaagcaccgc	0.774359	0.680325	14.9875	13.173	9.54196e-05	0.00116498	1	-1.81447	-0.0938126	strong
chr19	1095030	1095030	1	+	rs2074444	C	T	SNV	c(1, 19)	RREB1	jaspar2018	MA0073.1	MA0073.1	agcccaagccgcccacccaCccctaagcaccgcacccag	0.822488	0.775646	10.7578	10.1676	1.74749e-05	0.000103329	1	-0.590174	-0.0454178	weak
chr14	61919143	61919143	1	-	rs3825655	C	T	SNV	c(-3, 9)	ATF4	jaspar2018	MA0833.1	MA0833.1	tgtgttgcttgtTgcttcagtttca	0.777383	0.904928	10.8047	12.5618	0.00103508	4.95613e-05	1	1.75707	0.126668	strong
chr14	61919143	61919143	1	+	rs3825655	C	T	SNV	c(-4, 9)	Pax6	jaspar2018	MA0069.1	MA0069.1	atgtgttgcttgtCgcttcagtttcac	0.834377	0.773367	8.67923	8.06685	6.80685e-05	0.000394158	1	-0.612372	-0.0592143	weak
chr6	167370971	167370971	1	+	rs2149083	G	C	SNV	c(1, 14)	Klf12	jaspar2018	MA0742.1	MA0742.1	tcccctgcacccgcGgccccgcccacggg	0.875613	0.837219	13.0966	12.5269	4.7313e-05	0.000165879	1	-0.569751	-0.0381297	weak
chr6	167370971	167370971	1	+	rs2149083	G	C	SNV	c(-11, 2)	MTF1	jaspar2018	MA0863.1	MA0863.1	cccctgcacccgcCgccccgcccacgg	0.723143	0.793298	13.0201	14.2654	0.000349309	5.24372e-05	1	1.24522	0.0694327	strong
chr10	75669319	75669319	1	-	rs2227552	C	T	SNV	c(-2, 11)	PLAG1	jaspar2018	MA0163.1	MA0163.1	caggcagctggcaCcctgagccctcgg	0.80437	0.688375	11.3874	9.77923	8.33943e-05	0.00175782	1	-1.60822	-0.11406	strong
chr10	75669319	75669319	1	-	rs2227552	C	T	SNV	c(-7, 3)	Spz1	jaspar2018	MA0111.1	MA0111.1	gcagctggcaCcctgagccct	0.896121	0.737703	6.28742	5.20825	2.12193e-05	0.00193787	1	-1.07917	-0.154276	strong
chr10	104262628	104262628	1	+	rs2296590	G	A	SNV	c(-8, 2)	FOXH1	jaspar2018	MA0479.1	MA0479.1	tttccaatgcAcagtaccctg	0.781809	0.940336	9.89781	11.8961	0.00155735	3.43323e-05	1	1.99825	0.157988	strong
chr10	104262628	104262628	1	+	rs2296590	G	A	SNV	c(-11, 3)	Pou5f1::Sox2	jaspar2018	MA0142.1	MA0142.1	cgcatttccaatgcAcagtaccctgggat	0.783479	0.850284	9.47956	10.2627	0.000274355	3.60319e-05	1	0.783178	0.0651676	strong
chr12	6534949	6534949	1	-	rs2364488	G	C	SNV	c(-9, -1)	Sox3	jaspar2018	MA0514.1	MA0514.1	aaaacaaaaGaaacaaaca	0.947247	0.904342	10.7028	10.2189	3.71933e-05	0.000185013	1	-0.483977	-0.0428378	weak
chr12	6534949	6534949	1	-	rs2364488	G	C	SNV	c(-7, 7)	STAT1::STAT2	jaspar2018	MA0517.1	MA0517.1	ctcacaaaacaaaaGaaacaaacaaacca	0.848284	0.788052	12.1742	11.3231	8.0145e-05	0.000385663	1	-0.851141	-0.059445	strong
chr8	128197088	128197088	1	+	rs2445610	A	G	SNV	c(-10, 4)	Ets1	jaspar2018	MA0098.2	MA0098.2	atttccaatttcctGctattgtacttgaa	0.833529	0.89994	9.78467	10.5504	0.000568445	8.76458e-05	1	0.765778	0.0654275	strong
chr19	49112295	49112295	1	+	rs2617805	T	C	SNV	c(-9, 4)	ZIC1	jaspar2018	MA0696.1	MA0696.1	ggtgccacccctgCtgagggacctggt	0.775685	0.818494	12.9624	13.6719	0.000197183	5.55851e-05	1	0.709476	0.0425344	strong
chr19	49112295	49112295	1	+	rs2617805	T	C	SNV	c(-9, 5)	ZIC3	jaspar2018	MA0697.1	MA0697.1	gggtgccacccctgCtgagggacctggtt	0.766558	0.818765	11.4168	12.1829	0.000382351	8.96109e-05	1	0.766112	0.0516164	strong
chr11	35088683	35088683	1	-	rs2732547	T	C	SNV	c(-8, 9)	NFYA	jaspar2018	MA0060.2	MA0060.2	acttagtccttaaccaaTctgctctgcatcttaga	0.889974	0.766656	12.78	11.0436	3.14777e-05	0.000876097	1	-1.73645	-0.121182	strong
chr11	35088683	35088683	1	+	rs2732547	T	C	SNV	c(-6, 4)	NFYA	jaspar2018	MA0060.3	MA0060.3	ccttaaccaaTctgctctgca	0.904917	0.755183	9.94022	8.32221	7.79629e-05	0.00216269	1	-1.61801	-0.147526	strong
chr19	1065018	1065018	1	-	rs4147934	G	T	SNV	c(-10, 3)	EBF1	jaspar2018	MA0154.3	MA0154.3	cgagttccctgggGcggagctgcgcga	0.878637	0.755349	12.7951	11.0229	5.35697e-05	0.00110669	1	-1.77225	-0.12189	strong
chr19	1065018	1065018	1	-	rs4147934	G	T	SNV	c(-8, 1)	EBF1	jaspar2018	MA0154.1	MA0154.1	ttccctgggGcggagctgc	0.985261	0.854244	8.46081	7.35755	8.58307e-06	0.000706673	1	-1.10326	-0.128511	strong
chr19	1065018	1065018	1	-	rs4147934	G	T	SNV	c(-8, 2)	EBF1	jaspar2018	MA0154.2	MA0154.2	gttccctgggGcggagctgcg	0.962164	0.784984	10.9001	8.90056	8.10623e-06	0.00246572	1	-1.99953	-0.176527	strong
chr19	1065018	1065018	1	+	rs4147934	G	T	SNV	c(-11, 8)	Pax5	jaspar2018	MA0014.1	MA0014.1	ggcggccgagttccctgggGcggagctgcgcgaggcaca	0.897887	0.681331	5.77133	4.47634	1.21129e-05	0.0178478	1	-1.29498	-0.202913	strong
chr19	1065018	1065018	1	-	rs4147934	G	T	SNV	c(-4, 6)	SP1	jaspar2018	MA0079.3	MA0079.3	gttccctgggGcggagctgcg	0.926843	0.75475	10.8185	8.82014	5.17368e-05	0.00348949	1	-1.99835	-0.171268	strong
chr19	1065018	1065018	1	-	rs4147934	G	T	SNV	c(-9, 5)	TFAP2A	jaspar2018	MA0003.2	MA0003.2	ccgagttccctgggGcggagctgcgcgag	0.925559	0.75578	9.90309	8.12937	1.96472e-05	0.00310504	1	-1.77372	-0.166066	strong
chr19	1065018	1065018	1	+	rs4147934	G	T	SNV	c(-9, 2)	TFAP2A(var.2)	jaspar2018	MA0810.1	MA0810.1	agttccctgggGcggagctgcgc	0.95394	0.826785	8.3536	7.25415	6.66976e-05	0.00185865	1	-1.09945	-0.125625	strong
chr19	1065018	1065018	1	+	rs4147934	G	T	SNV	c(-9, 2)	TFAP2B	jaspar2018	MA0811.1	MA0811.1	agttccctgggGcggagctgcgc	0.934541	0.797581	8.26961	7.07526	7.9751e-05	0.00285083	1	-1.19435	-0.135101	strong
chr19	1065018	1065018	1	-	rs4147934	G	T	SNV	c(-9, 2)	TFAP2C	jaspar2018	MA0524.2	MA0524.2	agttccctgggGcggagctgcgc	0.920527	0.776095	7.74576	6.55225	0.00010401	0.00401556	1	-1.19351	-0.142042	strong
chr19	1065018	1065018	1	-	rs4147934	G	T	SNV	c(-9, 5)	TFAP2C	jaspar2018	MA0524.1	MA0524.1	ccgagttccctgggGcggagctgcgcgag	0.98791	0.796896	10.5034	8.50427	1.02539e-06	0.00226881	1	-1.99917	-0.188069	strong
chr19	49148143	49148143	1	-	rs34271003	C	T	SNV	c(-9, 10)	ESR1	jaspar2018	MA0112.2	MA0112.2	tttcaagcgtgagccaccgTgcccagccgatcaaaccca	0.718895	0.8064	7.67097	8.54159	0.000978226	8.88951e-05	1	0.870625	0.0831716	strong
chr19	49148143	49148143	1	+	rs34271003	C	T	SNV	c(-1, 7)	HIC2	jaspar2018	MA0738.1	MA0738.1	agccaccgTgcccagcc	0.745449	0.992026	5.41175	7.16406	0.0153198	6.10352e-05	1	1.75231	0.242678	strong
chr7	139761896	139761896	1	-	rs35064805	T	A	SNV	c(-5, 5)	Arid3b	jaspar2018	MA0601.1	MA0601.1	gtaagcagatTaatagggttg	0.976862	0.754097	8.86314	6.87517	5.45979e-05	0.0100932	1	-1.98798	-0.219191	strong
chr7	139761896	139761896	1	+	rs35064805	T	A	SNV	c(-8, 2)	Crx	jaspar2018	MA0467.1	MA0467.1	gtaagcagatTaatagggttg	0.913353	0.75447	10.198	8.44111	8.17776e-05	0.00346112	1	-1.75692	-0.157484	strong
chr7	139761896	139761896	1	-	rs35064805	T	A	SNV	c(-4, 7)	FOXI1	jaspar2018	MA0042.1	MA0042.1	tgtaagcagatAaatagggttga	0.76346	0.941819	7.63956	9.38575	0.00423717	7.25389e-05	1	1.74619	0.175402	strong
chr7	139761896	139761896	1	+	rs35064805	T	A	SNV	c(-6, 4)	Gata1	jaspar2018	MA0035.2	MA0035.2	gtaagcagatAaatagggttg	0.802908	0.978895	7.87052	9.57504	0.00327134	9.58443e-05	1	1.70452	0.174296	strong
chr7	139761896	139761896	1	-	rs35064805	T	A	SNV	c(-6, 4)	Gata1	jaspar2018	MA0035.3	MA0035.3	gtaagcagatAaatagggttg	0.751733	0.912233	9.45347	11.4526	0.00298882	9.5129e-05	1	1.99915	0.159348	strong
chr7	139761896	139761896	1	+	rs35064805	T	A	SNV	c(-9, 1)	Phox2b	jaspar2018	MA0681.1	MA0681.1	gtaagcagatTaatagggttg	0.886533	0.781961	10.1257	8.94647	9.89437e-05	0.00133109	1	-1.17927	-0.103397	strong
chr13	100036955	100036955	1	+	rs35694871	C	T	SNV	c(-10, 9)	TP53	jaspar2018	MA0106.1	MA0106.1	caggagtgcgatgccagggCcgagcatggcagtgacgcc	0.728431	0.687175	13.7046	12.9534	6.32576e-05	0.000253144	1	-0.751251	-0.0402819	strong
chr10	75758279	75758279	1	-	rs371489159	T	A	SNV	c(-8, 4)	JUN	jaspar2018	MA0488.1	MA0488.1	tcgaatggcctcAtctccgccctgt	0.779855	0.928452	10.547	12.5463	0.00110026	1.86712e-05	1	1.99927	0.147997	strong
chr10	75758279	75758279	1	-	rs371489159	T	A	SNV	c(-9, 5)	JUND(var.2)	jaspar2018	MA0492.1	MA0492.1	gttcgaatggcctcAtctccgccctgtga	0.749687	0.903314	9.83095	11.8305	0.00227195	5.21168e-05	1	1.99953	0.152765	strong
chr10	75757580	75757580	1	+	rs3812624	A	G	SNV	c(-8, 2)	E2F1	jaspar2018	MA0024.2	MA0024.2	cgggggcgggAccagccggct	0.944525	0.764295	10.4279	8.43935	8.08239e-05	0.00454903	1	-1.98858	-0.180124	strong
chr10	75757580	75757580	1	-	rs3812624	A	G	SNV	c(-13, 1)	E2F3	jaspar2018	MA0469.1	MA0469.1	ggcccgggggcgggAccagccggctccag	0.943513	0.787084	12.1876	10.1927	4.48795e-05	0.00175007	1	-1.99488	-0.154546	strong
chr10	75757580	75757580	1	+	rs3812624	A	G	SNV	c(-7, 3)	E2F4	jaspar2018	MA0470.1	MA0470.1	cgggggcgggAccagccggct	0.93486	0.799104	11.1489	9.53612	0.000104427	0.00168872	1	-1.61276	-0.135268	strong
chr10	75757580	75757580	1	+	rs3812624	A	G	SNV	c(-7, 3)	E2F6	jaspar2018	MA0471.1	MA0471.1	cgggggcgggAccagccggct	0.941394	0.77399	11.2587	9.26346	9.32217e-05	0.00271058	1	-1.99523	-0.166865	strong
chr10	75757580	75757580	1	-	rs3812624	A	G	SNV	c(-12, 2)	Klf12	jaspar2018	MA0742.1	MA0742.1	ggcccgggggcgggGccagccggctccag	0.761306	0.86413	11.4004	12.9262	0.000843999	6.83665e-05	1	1.52585	0.102115	strong
chr10	75757580	75757580	1	+	rs3812624	A	G	SNV	c(-8, 1)	Klf4	jaspar2018	MA0039.2	MA0039.2	gggggcgggGccagccggc	0.892433	0.99137	9.83713	10.9138	0.000265121	9.53674e-06	1	1.07665	0.0978091	strong
chr10	75757580	75757580	1	-	rs3812624	A	G	SNV	c(-8, 1)	KLF5	jaspar2018	MA0599.1	MA0599.1	gggggcgggGccagccggc	0.904935	1	10.3931	11.4813	0.000238419	0	1	1.08822	0.0947813	strong
chr10	75757580	75757580	1	+	rs3812624	A	G	SNV	c(-7, 4)	PAX5	jaspar2018	MA0014.3	MA0014.3	ccgggggcgggAccagccggctc	0.893018	0.779298	8.59816	7.53178	8.05259e-05	0.00129813	1	-1.06638	-0.111066	strong
chr10	75757580	75757580	1	-	rs3812624	A	G	SNV	c(-9, 1)	SP1	jaspar2018	MA0079.3	MA0079.3	cgggggcgggGccagccggct	0.961653	1	11.2227	11.668	1.12057e-05	0	1	0.445284	0.0381629	weak
chr10	75757580	75757580	1	-	rs3812624	A	G	SNV	c(-9, 1)	SP3	jaspar2018	MA0746.1	MA0746.1	cgggggcgggGccagccggct	0.889957	0.947053	7.59265	8.06633	0.00028491	4.50611e-05	1	0.473679	0.0556903	weak
chr10	75757580	75757580	1	-	rs3812624	A	G	SNV	c(-12, 4)	SP4	jaspar2018	MA0685.1	MA0685.1	gcggcccgggggcgggGccagccggctccagcg	0.842341	0.933396	14.7722	16.3569	3.80101e-05	1.15449e-06	1	1.5847	0.0904714	strong
chr10	75757580	75757580	1	-	rs3812624	A	G	SNV	c(-10, 1)	SP8	jaspar2018	MA0747.1	MA0747.1	ccgggggcgggGccagccggctc	0.837666	0.900245	8.13777	8.73424	0.00036788	6.30021e-05	1	0.596474	0.061587	weak
chr3	18799516	18799516	1	-	rs3923396	G	A	SNV	c(-6, 4)	SIX1	jaspar2018	MA1118.1	MA1118.1	cttcaatcagGttcaccaaga	0.911927	0.815513	9.54315	8.55852	7.34329e-05	0.000654459	1	-0.984633	-0.09429	strong
chr21	45616275	45616275	1	+	rs4317019	G	C	SNV	c(-6, 8)	EGR2	jaspar2018	MA0472.1	MA0472.1	gcatcagcacaacaCccacagccgtgaca	0.718045	0.889162	8.48554	10.4757	0.00515546	9.22801e-05	1	1.99015	0.169162	strong
chr21	45616275	45616275	1	+	rs4317019	G	C	SNV	c(-10, 9)	RREB1	jaspar2018	MA0073.1	MA0073.1	agattgcatcagcacaacaCccacagccgtgacacgggg	0.769986	0.806918	10.0963	10.5616	0.00012552	3.27347e-05	1	0.465331	0.0358103	weak
chr11	35161288	35161288	1	-	rs12365962	G	A	SNV	c(-8, 4)	TFAP2A(var.3)	jaspar2018	MA0872.1	MA0872.1	ccaagccccaccGggctgtgtctag	0.904958	0.847186	11.173	10.4715	8.37445e-05	0.000375152	1	-0.701474	-0.0569053	strong
chr1	154414086	154414086	1	+	rs4453032	A	G	SNV	c(-11, 3)	MEF2A	jaspar2018	MA0052.2	MA0052.2	agttctgaaaaataGggggaaggttagag	0.815093	0.865865	10.4805	11.1245	0.000333376	8.5514e-05	1	0.643955	0.0502079	weak
chr1	154414086	154414086	1	+	rs4453032	A	G	SNV	c(-12, 2)	MEF2C	jaspar2018	MA0497.1	MA0497.1	agttctgaaaaataGggggaaggttagag	0.857252	0.904236	10.1249	10.6718	0.00025164	6.06086e-05	1	0.546902	0.0464006	weak
chr1	154414086	154414086	1	+	rs4453032	A	G	SNV	c(-5, 12)	PPARA::RXRA	jaspar2018	MA1148.1	MA1148.1	ggcagttctgaaaaataGggggaaggttagagcac	0.740182	0.839113	7.00514	7.89139	0.000839351	4.8295e-05	1	0.886251	0.0949624	strong
chr1	154414086	154414086	1	+	rs4453032	A	G	SNV	c(-4, 9)	SPI1	jaspar2018	MA0080.4	MA0080.4	gttctgaaaaataAggggaaggttaga	0.796962	0.730509	16.258	14.9088	7.11307e-05	0.000364713	1	-1.34919	-0.0662006	strong
chr1	154414086	154414086	1	+	rs4453032	A	G	SNV	c(-4, 9)	SPIC	jaspar2018	MA0687.1	MA0687.1	gttctgaaaaataAggggaaggttaga	0.866415	0.79393	9.31551	8.55472	6.36019e-05	0.000498567	1	-0.760796	-0.0709856	strong
chr3	33037752	33037752	1	+	rs4678524	A	C	SNV	c(-4, 4)	HIC2	jaspar2018	MA0738.1	MA0738.1	atctgtgcCcatacaca	0.814543	0.987547	5.90277	7.13223	0.00699615	0.000133514	1	1.22946	0.170268	strong
chr19	1026477	1026477	1	+	rs4807440	G	T	SNV	c(-9, 4)	CTCFL	jaspar2018	MA1102.1	MA1102.1	ggcgaccgaggggGctcaggaagtccg	0.880952	0.758656	11.2305	9.71432	5.09024e-05	0.00104871	1	-1.5162	-0.119325	strong
chr10	112148651	112148651	1	+	rs4918503	T	G	SNV	c(-2, 10)	HNF1B	jaspar2018	MA0153.2	MA0153.2	aaacctcacagtTaatgatccagct	0.808144	0.762639	11.7468	11.0944	0.000105083	0.000356063	1	-0.652405	-0.0450012	weak
chr10	112148651	112148651	1	-	rs4918503	T	G	SNV	c(-1, 6)	NKX6-1	jaspar2018	MA0674.1	MA0674.1	tcacagtTaatgatc	0.97601	0.798233	7.80416	6.3945	9.15527e-05	0.00517273	1	-1.40967	-0.176332	strong
chr15	75099513	75099513	1	-	rs537509524	G	C	SNV	c(1, 13)	GLIS3	jaspar2018	MA0737.1	MA0737.1	cttccttagagcaCggggtgggtggtg	0.705651	0.79189	13.6617	15.3258	0.00062665	5.58496e-05	1	1.66406	0.086036	strong
chr15	75099513	75099513	1	-	rs537509524	G	C	SNV	c(-1, 9)	Klf1	jaspar2018	MA0493.1	MA0493.1	ccttagagcaGggggtgggtg	0.900762	0.847299	10.7114	10.0807	0.000102282	0.000441313	1	-0.630717	-0.0530812	weak
chr15	75099513	75099513	1	-	rs537509524	G	C	SNV	c(-5, 9)	Klf12	jaspar2018	MA0742.1	MA0742.1	ccttccttagagcaGggggtgggtggtgg	0.854111	0.748857	12.7775	11.2156	9.26321e-05	0.00114682	1	-1.5619	-0.104527	strong
chr15	75099513	75099513	1	-	rs537509524	G	C	SNV	c(1, 10)	KLF16	jaspar2018	MA0741.1	MA0741.1	ccttagagcaGggggtgggtg	0.920628	0.843391	10.5096	9.638	3.79086e-05	0.000360966	1	-0.871614	-0.0764216	strong
chr15	75099513	75099513	1	-	rs537509524	G	C	SNV	c(-5, 14)	RREB1	jaspar2018	MA0073.1	MA0073.1	tagagccttccttagagcaGggggtgggtggtgggaacc	0.883506	0.82249	11.5266	10.7578	9.18185e-07	1.74727e-05	1	-0.768764	-0.0591614	strong
chr15	75099513	75099513	1	-	rs537509524	G	C	SNV	c(-2, 8)	SP3	jaspar2018	MA0746.1	MA0746.1	ccttagagcaGggggtgggtg	0.929133	0.863095	7.91766	7.3698	7.65324e-05	0.000551224	1	-0.547867	-0.0644126	weak
chr15	75099513	75099513	1	+	rs537509524	G	C	SNV	c(-6, 14)	ZNF263	jaspar2018	MA0528.1	MA0528.1	gtagagccttccttagagcaGggggtgggtggtgggaaccc	0.772699	0.724582	8.79185	8.26574	6.79059e-05	0.000397848	1	-0.526107	-0.0466526	weak
chr19	1088947	1088947	1	-	rs545849567	G	T	SNV	c(-1, 13)	ZSCAN4	jaspar2018	MA1155.1	MA1155.1	caagccccacccctTggctgagtgtgaag	0.689324	0.790443	13.4999	15.4643	0.00118808	8.6627e-05	1	1.96434	0.100554	strong
chr19	1067221	1067221	1	+	rs549686945	C	T	SNV	c(-4, 9)	EGR1	jaspar2018	MA0162.2	MA0162.2	gaggccgcgtcgcCgcctccccgaagc	0.886737	0.759416	10.458	8.97125	7.89911e-05	0.00180177	1	-1.48672	-0.126202	strong
chr19	1174527	1174527	1	+	rs555302555	G	A	SNV	c(-4, 9)	BACH2	jaspar2018	MA1101.1	MA1101.1	aatctgctttgtgAtacagcatcccct	0.711431	0.843848	9.4014	11.102	0.00223963	0.000101373	1	1.70061	0.129744	strong
chr19	1174527	1174527	1	-	rs555302555	G	A	SNV	c(-4, 6)	DMRT3	jaspar2018	MA0610.1	MA0610.1	ctgctttgtgAtacagcatcc	0.916184	0.973154	9.36783	9.9397	0.000564814	6.12736e-05	1	0.57187	0.0560153	weak
chr19	1174527	1174527	1	+	rs555302555	G	A	SNV	c(-3, 11)	MAF::NFE2	jaspar2018	MA0501.1	MA0501.1	gaatctgctttgtgAtacagcatcccctt	0.706286	0.833586	11.1939	13.1827	0.00155273	6.05779e-05	1	1.98887	0.126016	strong
chr19	1174527	1174527	1	+	rs555302555	G	A	SNV	c(-7, 7)	Nfe2l2	jaspar2018	MA0150.2	MA0150.2	gaatctgctttgtgAtacagcatcccctt	0.717821	0.862366	10.1225	12.1064	0.00186644	4.80209e-05	1	1.98391	0.141754	strong
chr19	1174527	1174527	1	+	rs555302555	G	A	SNV	c(-3, 7)	NFE2L2	jaspar2018	MA0150.1	MA0150.1	ctgctttgtgAtacagcatcc	0.759728	0.913817	8.29869	9.93784	0.0021534	6.50883e-05	1	1.63915	0.151009	strong
chr19	1174527	1174527	1	+	rs555302555	G	A	SNV	c(-7, 3)	RUNX1	jaspar2018	MA0002.1	MA0002.1	ctgctttgtgGtacagcatcc	0.951028	0.751161	8.29159	6.5844	8.34465e-05	0.00713873	1	-1.70719	-0.196006	strong
chr2	62541081	62541081	1	-	rs55893750	G	T	SNV	c(-3, 5)	CDX1	jaspar2018	MA0878.1	MA0878.1	ttctatttTatggtagt	0.851099	0.977765	6.56274	7.52069	0.00133896	6.48499e-05	1	0.957955	0.12459	strong
chr2	62541081	62541081	1	-	rs55893750	G	T	SNV	c(-3, 7)	CDX2	jaspar2018	MA0465.1	MA0465.1	ggttctatttTatggtagtag	0.791076	0.954245	9.71612	11.7083	0.00167036	4.62532e-05	1	1.99214	0.1624	strong
chr2	62541081	62541081	1	-	rs55893750	G	T	SNV	c(-4, 5)	HOXB13	jaspar2018	MA0901.1	MA0901.1	gttctatttTatggtagta	0.803901	0.919349	8.76958	10.013	0.00122261	7.53403e-05	1	1.24345	0.11427	strong
chr2	62541081	62541081	1	-	rs55893750	G	T	SNV	c(-4, 5)	HOXD13	jaspar2018	MA0909.1	MA0909.1	gttctatttTatggtagta	0.826436	0.941731	8.82729	10.0464	0.00120735	7.15256e-05	1	1.21909	0.114334	strong
chr2	62541081	62541081	1	-	rs55893750	G	T	SNV	c(-8, 6)	MEF2C	jaspar2018	MA0497.1	MA0497.1	aataggttctatttTatggtagtagaagc	0.845679	0.906463	9.9902	10.6977	0.000340817	5.55106e-05	1	0.70755	0.0600303	strong
chr10	75634937	75634937	1	-	rs562773274	T	C	SNV	c(-2, 7)	SP1	jaspar2018	MA0079.1	MA0079.1	aggtaggacCctgccttcc	0.850604	0.962913	4.51896	5.08393	0.00200367	3.33786e-05	1	0.564971	0.107195	weak
chr10	75634937	75634937	1	-	rs562773274	T	C	SNV	c(-13, 6)	TP63	jaspar2018	MA0525.1	MA0525.1	gcaaggatacaggtaggacCctgccttcctgcaccataa	0.722133	0.899671	8.00726	9.90243	0.00547716	6.74033e-05	1	1.89517	0.172706	strong
chr10	75670568	75670568	1	+	rs568057544	T	G	SNV	c(-12, 6)	CTCF	jaspar2018	MA0139.1	MA0139.1	tagaggaccccaggaggcGtcagagctgggcgaggta	0.773458	0.831542	10.7004	11.4841	0.000460485	8.24842e-05	1	0.783751	0.0569702	strong
chr10	75692611	75692611	1	-	rs573939960	G	A	SNV	c(-14, 6)	IRF1	jaspar2018	MA0050.2	MA0050.2	agactccctctcaaaaagaaAaaagttggggtggggtgtcc	0.741752	0.819983	11.4921	12.6717	0.00091079	9.99746e-05	1	1.17963	0.0766683	strong
chr10	75692611	75692611	1	+	rs573939960	G	A	SNV	c(-9, 2)	IRF1	jaspar2018	MA0050.1	MA0050.1	ctcaaaaagaaAaaagttggggt	0.7679	0.880432	9.13454	10.4423	0.00118041	6.61612e-05	1	1.30777	0.110529	strong
chr12	6455230	6455230	1	-	rs61283233	T	C	SNV	c(-4, 13)	PPARA::RXRA	jaspar2018	MA1148.1	MA1148.1	tcaccagctccttctccCctttccccgaaagtctc	0.778634	0.840855	7.34961	7.907	0.000309414	4.56532e-05	1	0.55739	0.0597247	weak
chr12	6455230	6455230	1	-	rs61283233	T	C	SNV	c(-18, 2)	ZNF263	jaspar2018	MA0528.1	MA0528.1	ctgtcaccagctccttctccTctttccccgaaagtctcttc	0.796019	0.751985	9.04683	8.56537	2.54377e-05	0.000151201	1	-0.481461	-0.0426936	weak
chr2	71174230	71174230	1	+	rs68044170	T	C	SNV	c(-7, 4)	TAL1::TCF3	jaspar2018	MA0091.1	MA0091.1	tgtaagaacatCtgagggaagaa	0.840654	0.909733	9.31939	10.0741	0.000489771	7.18832e-05	1	0.754708	0.0682359	strong
chr2	71174230	71174230	1	-	rs68044170	T	C	SNV	c(-6, 6)	TWIST1	jaspar2018	MA1123.1	MA1123.1	atgtaagaacatCtgagggaagaat	0.828969	0.944289	8.64772	9.82687	0.000899762	0.000102922	1	1.17915	0.113418	strong
chr2	71174230	71174230	1	-	rs68044170	T	C	SNV	c(-6, 6)	ZBTB18	jaspar2018	MA0698.1	MA0698.1	atgtaagaacatCtgagggaagaat	0.795177	0.925826	11.2395	13.0687	0.000818595	3.49283e-05	1	1.82912	0.129659	strong
chr7	20600404	20600404	1	-	rs6954065	C	T	SNV	c(-10, 8)	CTCF	jaspar2018	MA0139.1	MA0139.1	ctgcctgttcctggctccTgctggctccacggagcgt	0.749249	0.851923	10.3737	11.7591	0.000856169	4.06942e-05	1	1.38544	0.100706	strong
chr7	20600404	20600404	1	+	rs6954065	C	T	SNV	c(-4, 10)	E2F3	jaspar2018	MA0469.1	MA0469.1	ctgttcctggctccCgctggctccacgga	0.951552	0.795123	12.2901	10.2952	3.08426e-05	0.00143429	1	-1.99488	-0.154546	strong
chr5	172324558	172324558	1	-	rs472959	G	A	SNV	c(-13, 7)	IRF1	jaspar2018	MA0050.2	MA0050.2	ttaaaaggactttaaagtgaAagcaaaagtgaatattgcct	0.798652	0.914871	12.35	14.1025	0.000195149	4.78143e-06	1	1.75243	0.113897	strong
chr5	172324558	172324558	1	+	rs472959	G	A	SNV	c(-8, 3)	IRF1	jaspar2018	MA0050.1	MA0050.1	ctttaaagtgaAagcaaaagtga	0.844978	0.961015	10.0303	11.3788	0.000175118	4.88758e-06	1	1.3485	0.113972	strong
chr5	172324558	172324558	1	+	rs472959	G	A	SNV	c(-9, 8)	IRF2	jaspar2018	MA0051.1	MA0051.1	aaaggactttaaagtgaAagcaaaagtgaatattg	0.801078	0.911548	11.0386	12.5066	0.000159418	4.03915e-06	1	1.46801	0.107295	strong
chr5	172324558	172324558	1	+	rs472959	G	A	SNV	c(-10, 10)	IRF3	jaspar2018	MA1418.1	MA1418.1	ttaaaaggactttaaagtgaAagcaaaagtgaatattgcct	0.697549	0.787711	15.0485	16.9634	0.000458507	2.92968e-05	1	1.91492	0.0891816	strong
chr5	172324558	172324558	1	+	rs472959	G	A	SNV	c(-10, 3)	IRF7	jaspar2018	MA0772.1	MA0772.1	gactttaaagtgaAagcaaaagtgaat	0.731423	0.851939	11.7256	13.6308	0.00115443	5.43706e-05	1	1.90517	0.119287	strong
chr5	172324558	172324558	1	+	rs472959	G	A	SNV	c(-9, 5)	PRDM1	jaspar2018	MA0508.1	MA0508.1	ggactttaaagtgaAagcaaaagtgaata	0.839122	0.934593	11.1118	12.3477	0.000102416	3.74671e-06	1	1.23588	0.0936673	strong
chr5	172324558	172324558	1	-	rs472959	G	A	SNV	c(-9, 5)	STAT1::STAT2	jaspar2018	MA0517.1	MA0517.1	ggactttaaagtgaAagcaaaagtgaata	0.71647	0.85011	10.3115	12.2	0.002005	7.72811e-05	1	1.88848	0.131894	strong
chr11	128494441	128494441	1	-	rs7105899	G	A	SNV	c(-10, 3)	EGR1	jaspar2018	MA0162.2	MA0162.2	ggtggggtgggggGatgccaatgcagg	0.896785	0.837359	10.5753	9.8814	5.36107e-05	0.000311118	1	-0.693916	-0.0589035	weak
chr11	128494441	128494441	1	-	rs7105899	G	A	SNV	c(-4, 6)	NFKB1	jaspar2018	MA0105.3	MA0105.3	ggggtgggggAatgccaatgc	0.782592	0.922755	9.70264	11.4265	0.0020256	0.00010252	1	1.72387	0.139285	strong
chr11	128494441	128494441	1	-	rs7105899	G	A	SNV	c(-6, 4)	RELB	jaspar2018	MA1117.1	MA1117.1	ggggtgggggAatgccaatgc	0.844409	0.998088	7.60973	8.95087	0.000771046	1.4782e-05	1	1.34114	0.149555	strong
chr11	128494441	128494441	1	+	rs7105899	G	A	SNV	c(-4, 16)	ZNF263	jaspar2018	MA0528.1	MA0528.1	gttggggggtggggtgggggGatgccaatgcaggggcgggg	0.764089	0.708198	8.6977	8.0866	9.54499e-05	0.000678268	1	-0.611103	-0.0541896	weak
chr11	128494441	128494441	1	-	rs7105899	G	A	SNV	c(-7, 2)	ZNF740	jaspar2018	MA0753.1	MA0753.1	gggtgggggGatgccaatg	0.909401	0.826274	10.2454	9.32178	6.48499e-05	0.000592232	1	-0.923622	-0.0820849	strong
chr12	6427181	6427181	1	+	rs71584815	G	A	SNV	c(-6, 11)	EWSR1-FLI1	jaspar2018	MA0149.1	MA0149.1	agagggcaaagggaaggAacccaggaaaagcaagg	0.698459	0.754325	21.5918	23.3106	3.58888e-05	4.12256e-06	1	1.71883	0.0556809	strong
chr10	82253134	82253134	1	+	rs72819595	G	A	SNV	c(-3, 6)	Atoh1	jaspar2018	MA0461.2	MA0461.2	agaattaccAtatgatcca	0.827696	0.981584	8.29541	9.82071	0.00125122	3.24249e-05	1	1.5253	0.15248	strong
chr10	82253134	82253134	1	+	rs72819595	G	A	SNV	c(-3, 6)	BHLHE22	jaspar2018	MA0818.1	MA0818.1	agaattaccAtatgatcca	0.876648	0.987199	10.2122	11.4904	0.000281334	7.62939e-06	1	1.27827	0.109831	strong
chr10	82253134	82253134	1	-	rs72819595	G	A	SNV	c(-4, 7)	BHLHE23	jaspar2018	MA0817.1	MA0817.1	atagaattaccAtatgatccaac	0.848889	0.970262	11.7025	13.3662	0.000287473	1.16229e-05	1	1.66378	0.120792	strong
chr10	82253134	82253134	1	+	rs72819595	G	A	SNV	c(-3, 6)	NEUROD2	jaspar2018	MA0668.1	MA0668.1	agaattaccAtatgatcca	0.882361	0.972057	7.77973	8.56544	0.000313759	4.3869e-05	1	0.785706	0.0891814	strong
chr10	82253134	82253134	1	+	rs72819595	G	A	SNV	c(-3, 6)	NEUROG2	jaspar2018	MA0669.1	MA0669.1	agaattaccAtatgatcca	0.766693	0.911032	9.93699	11.8038	0.00196934	7.53403e-05	1	1.86683	0.144107	strong
chr10	82253134	82253134	1	+	rs72819595	G	A	SNV	c(-3, 6)	OLIG1	jaspar2018	MA0826.1	MA0826.1	agaattaccAtatgatcca	0.850486	0.97784	11.4927	13.2075	0.000288963	8.58307e-06	1	1.71485	0.12697	strong
chr10	82253134	82253134	1	+	rs72819595	G	A	SNV	c(-3, 6)	OLIG2	jaspar2018	MA0678.1	MA0678.1	agaattaccAtatgatcca	0.866366	0.982441	9.91862	11.2379	0.000265121	5.72205e-06	1	1.31924	0.115344	strong
chr10	82253134	82253134	1	+	rs72819595	G	A	SNV	c(-3, 6)	OLIG3	jaspar2018	MA0827.1	MA0827.1	agaattaccAtatgatcca	0.856602	0.985594	8.31206	9.5515	0.000339508	4.76837e-06	1	1.23944	0.12791	strong
chr10	82253134	82253134	1	-	rs72819595	G	A	SNV	c(-9, 4)	POU1F1	jaspar2018	MA0784.1	MA0784.1	aaatagaattaccAtatgatccaacaa	0.75594	0.869859	9.68962	11.1019	0.000931095	4.59366e-05	1	1.41233	0.111073	strong
chr10	82253134	82253134	1	-	rs72819595	G	A	SNV	c(-7, 4)	POU2F1	jaspar2018	MA0785.1	MA0785.1	atagaattaccAtatgatccaac	0.788946	0.920984	8.12388	9.4508	0.001203	3.67761e-05	1	1.32692	0.129521	strong
chr10	82253134	82253134	1	-	rs72819595	G	A	SNV	c(-8, 3)	POU3F1	jaspar2018	MA0786.1	MA0786.1	atagaattaccAtatgatccaac	0.788107	0.947334	7.92292	9.47631	0.00151569	2.0206e-05	1	1.55339	0.155493	strong
chr10	82253134	82253134	1	-	rs72819595	G	A	SNV	c(-8, 3)	POU3F2	jaspar2018	MA0787.1	MA0787.1	atagaattaccAtatgatccaac	0.814346	0.943775	9.69703	11.2062	0.00054121	1.56164e-05	1	1.50918	0.12723	strong
chr10	82253134	82253134	1	-	rs72819595	G	A	SNV	c(-8, 4)	POU3F3	jaspar2018	MA0788.1	MA0788.1	aatagaattaccAtatgatccaaca	0.806776	0.922277	9.01795	10.2717	0.000440747	1.55568e-05	1	1.2537	0.112791	strong
chr10	82253134	82253134	1	-	rs72819595	G	A	SNV	c(-6, 2)	POU3F4	jaspar2018	MA0789.1	MA0789.1	gaattaccAtatgatcc	0.772254	0.925886	9.40003	11.2495	0.00123596	3.05176e-05	1	1.84945	0.152322	strong
chr10	82253134	82253134	1	-	rs72819595	G	A	SNV	c(-6, 2)	POU5F1B	jaspar2018	MA0792.1	MA0792.1	gaattaccAtatgatcc	0.771006	0.92478	6.9522	8.30562	0.00278854	6.10352e-05	1	1.35342	0.150922	strong
chr10	82253134	82253134	1	+	rs72819595	G	A	SNV	c(-5, 6)	TAL1::TCF3	jaspar2018	MA0091.1	MA0091.1	atagaattaccAtatgatccaac	0.757758	0.923443	8.41373	10.2239	0.0026468	4.95911e-05	1	1.81015	0.163662	strong
chr10	82253134	82253134	1	+	rs72819595	G	A	SNV	c(-3, 6)	Twist2	jaspar2018	MA0633.1	MA0633.1	agaattaccAtatgatcca	0.761341	0.946227	8.28251	10.2705	0.00427246	7.62939e-05	1	1.98797	0.183245	strong
chr11	128172643	128172643	1	-	rs73018928	T	A	SNV	c(-1, 9)	Nkx2-5(var.2)	jaspar2018	MA0503.1	MA0503.1	tgtggcctggTtgagtgtagc	0.948931	0.90922	10.4465	10.0122	6.38962e-05	0.000272274	1	-0.434293	-0.0394633	weak
chr9	123639264	123639264	1	+	rs73541868	G	A	SNV	c(-8, 1)	ZNF740	jaspar2018	MA0753.1	MA0753.1	tcaccccccAgaggcgttc	0.850959	0.889746	9.59606	10.027	0.000307083	8.10623e-05	1	0.430958	0.0383005	weak
chr3	101109702	101109702	1	+	rs7628516	C	T	SNV	c(-5, 7)	Hoxc9	jaspar2018	MA0485.1	MA0485.1	taagacacaaaaTaaatctcaataa	0.747432	0.908134	8.83267	10.7006	0.00289479	5.26011e-05	1	1.86791	0.158723	strong
chr19	1113720	1113720	1	+	rs76868812	G	A	SNV	c(-3, 7)	ESRRA	jaspar2018	MA0592.1	MA0592.1	aggaggtggaAggtcagggca	0.784878	0.904524	10.0626	11.5838	0.000863075	6.27041e-05	1	1.52126	0.118869	strong
chr19	1113720	1113720	1	+	rs76868812	G	A	SNV	c(-6, 5)	Esrrb	jaspar2018	MA0141.1	MA0141.1	gaggaggtggaAggtcagggcag	0.799462	0.949223	9.3687	11.1027	0.00099951	2.89083e-05	1	1.73404	0.148327	strong
chr19	1113720	1113720	1	+	rs76868812	G	A	SNV	c(-6, 5)	Esrrb	jaspar2018	MA0141.2	MA0141.2	gaggaggtggaAggtcagggcag	0.797917	0.950155	9.47896	11.267	0.00101835	2.91467e-05	1	1.788	0.150855	strong
chr19	1113720	1113720	1	+	rs76868812	G	A	SNV	c(-3, 7)	ESRRB	jaspar2018	MA0141.3	MA0141.3	aggaggtggaAggtcagggca	0.745369	0.872983	11.533	13.4954	0.00153327	6.96182e-05	1	1.96234	0.127024	strong
chr19	1113720	1113720	1	+	rs76868812	G	A	SNV	c(-3, 6)	Esrrg	jaspar2018	MA0643.1	MA0643.1	ggaggtggaAggtcagggc	0.80122	0.964003	9.68444	11.636	0.00113869	3.24249e-05	1	1.95152	0.161717	strong
chr19	1113720	1113720	1	+	rs76868812	G	A	SNV	c(-9, 7)	NR1H2::RXRA	jaspar2018	MA0115.1	MA0115.1	ctagggaggaggtggaAggtcagggcaggacat	0.704916	0.780174	16.1987	17.8965	0.000180897	1.54708e-05	1	1.6978	0.0742833	strong
chr19	1113720	1113720	1	+	rs76868812	G	A	SNV	c(-9, 5)	NR2C2	jaspar2018	MA0504.1	MA0504.1	agggaggaggtggaAggtcagggcaggac	0.800095	0.865462	10.2986	11.1325	0.000116071	1.16695e-05	1	0.833883	0.0648999	strong
chr19	1113720	1113720	1	+	rs76868812	G	A	SNV	c(-3, 7)	NR2F2	jaspar2018	MA1111.1	MA1111.1	aggaggtggaAggtcagggca	0.849044	0.993537	8.81974	10.2973	0.000502586	5.10216e-05	1	1.47752	0.142572	strong
chr19	1113720	1113720	1	+	rs76868812	G	A	SNV	c(-8, 5)	Nr2f6	jaspar2018	MA0677.1	MA0677.1	gggaggaggtggaAggtcagggcagga	0.753198	0.837976	12.1722	13.5174	0.000185285	1.2897e-05	1	1.34519	0.0836132	strong
chr19	1113720	1113720	1	+	rs76868812	G	A	SNV	c(-3, 6)	NR4A1	jaspar2018	MA1112.1	MA1112.1	ggaggtggaAggtcagggc	0.825827	0.972179	9.86654	11.5978	0.000713348	2.67029e-05	1	1.73127	0.145156	strong
chr19	1113720	1113720	1	+	rs76868812	G	A	SNV	c(-11, 6)	PPARA::RXRA	jaspar2018	MA1148.1	MA1148.1	cctagggaggaggtggaAggtcagggcaggacatg	0.757508	0.837516	7.16035	7.87708	0.000545202	5.08738e-05	1	0.71673	0.076798	strong
chr19	1113720	1113720	1	+	rs76868812	G	A	SNV	c(-11, 8)	PPARG::RXRA	jaspar2018	MA0065.1	MA0065.1	gtcctagggaggaggtggaAggtcagggcaggacatgtt	0.761844	0.834376	14.9755	16.3802	8.47167e-05	7.57063e-06	1	1.40468	0.071712	strong
chr19	1113720	1113720	1	+	rs76868812	G	A	SNV	c(-1, 15)	Rarg(var.2)	jaspar2018	MA0860.1	MA0860.1	ctagggaggaggtggaAggtcagggcaggacat	0.8159	0.878575	19.4624	20.9483	8.88127e-06	7.39063e-07	1	1.4859	0.0623619	strong
chr19	1113720	1113720	1	+	rs76868812	G	A	SNV	c(-8, 5)	Rxra	jaspar2018	MA0512.2	MA0512.2	gggaggaggtggaAggtcagggcagga	0.753294	0.832419	16.0338	17.7127	0.000125632	1.02669e-05	1	1.67885	0.0789366	strong
chr19	1113720	1113720	1	+	rs76868812	G	A	SNV	c(-8, 5)	RXRB	jaspar2018	MA0855.1	MA0855.1	gggaggaggtggaAggtcagggcagga	0.748955	0.824071	16.3519	17.9876	0.000126574	1.19768e-05	1	1.63578	0.0749709	strong
chr19	1113720	1113720	1	+	rs76868812	G	A	SNV	c(-8, 5)	RXRG	jaspar2018	MA0856.1	MA0856.1	gggaggaggtggaAggtcagggcagga	0.752562	0.827666	15.6728	17.2335	0.00014656	1.42008e-05	1	1.5607	0.0749809	strong
chr6	159528132	159528132	1	-	rs7748054	C	G	SNV	c(-3, 7)	Erg	jaspar2018	MA0474.1	MA0474.1	tcgttgcttcCttcctttgtt	0.946102	0.857789	11.2286	10.189	9.41753e-05	0.000615597	1	-1.03963	-0.0876355	strong
chr6	159528132	159528132	1	-	rs7748054	C	G	SNV	c(-13, 4)	EWSR1-FLI1	jaspar2018	MA0149.1	MA0149.1	tgcactttcgttgcttcCttcctttgttgctttgt	0.83984	0.780536	25.9416	24.1171	1.13709e-07	1.93332e-06	1	-1.82458	-0.0591068	strong
chr6	159528132	159528132	1	-	rs7748054	C	G	SNV	c(-1, 8)	Klf4	jaspar2018	MA0039.1	MA0039.1	cgttgcttcCttcctttgt	0.985719	0.87571	4.59227	4.1017	6.67572e-06	0.000563622	1	-0.49056	-0.105362	weak
chr19	1030877	1030877	1	-	rs528084875	G	A	SNV	c(-4, 8)	ASCL1	jaspar2018	MA1100.1	MA1100.1	ttatctgtgcccAcctgcagtggct	0.735959	0.879381	8.90787	10.6134	0.00253414	0.000100821	1	1.70548	0.141561	strong
chr19	1030877	1030877	1	+	rs528084875	G	A	SNV	c(-3, 7)	Tcf3	jaspar2018	MA0522.1	MA0522.1	atctgtgcccAcctgcagtgg	0.784481	0.95672	9.16357	11.1627	0.00218892	6.34193e-05	1	1.99912	0.171377	strong
chr19	1030877	1030877	1	+	rs528084875	G	A	SNV	c(-3, 6)	TCF3	jaspar2018	MA0522.2	MA0522.2	tctgtgcccAcctgcagtg	0.805553	0.98982	8.60801	10.5685	0.0033865	0.000103951	1	1.96051	0.183622	strong
chr19	1030877	1030877	1	+	rs528084875	G	A	SNV	c(-3, 7)	ZEB1	jaspar2018	MA0103.3	MA0103.3	atctgtgcccAcctgcagtgg	0.818695	0.999045	8.56469	10.433	0.0032649	6.19888e-06	1	1.86836	0.178911	strong
chr19	1030877	1030877	1	+	rs528084875	G	A	SNV	c(-4, 4)	ZEB1	jaspar2018	MA0103.2	MA0103.2	ctgtgcccAcctgcagt	0.832411	0.99083	10.5295	12.5257	0.00117493	4.95911e-05	1	1.99622	0.157914	strong
chr5	96309180	96309180	1	-	rs77956926	A	G	SNV	c(1, 11)	FOXI1	jaspar2018	MA0042.1	MA0042.1	cttatagttctAtataaatatgt	0.958826	0.89584	9.55225	8.9356	4.45247e-05	0.000413239	1	-0.61665	-0.0619415	weak
chr12	56728137	56728137	1	+	rs79824801	T	C	SNV	c(-5, 5)	NFKB1	jaspar2018	MA0105.3	MA0105.3	ctgttgggtaTtcccagcggg	0.924533	0.814709	11.4484	10.0976	9.87053e-05	0.000908375	1	-1.35073	-0.109136	strong
chr12	56728137	56728137	1	+	rs79824801	T	C	SNV	c(-6, 3)	REL	jaspar2018	MA0101.1	MA0101.1	tgttgggtaTtcccagcgg	0.967779	0.828038	7.11455	6.11339	5.91278e-05	0.00116348	1	-1.00116	-0.136298	strong
chr12	56728137	56728137	1	+	rs79824801	T	C	SNV	c(-2, 11)	ZIC1	jaspar2018	MA0696.1	MA0696.1	tcgctgttgggtaCtcccagcggggct	0.703599	0.805576	11.7678	13.4578	0.00122862	8.29846e-05	1	1.69006	0.101323	strong
chr12	56728137	56728137	1	+	rs79824801	T	C	SNV	c(-2, 12)	ZIC3	jaspar2018	MA0697.1	MA0697.1	gtcgctgttgggtaCtcccagcggggctt	0.789246	0.82785	11.7497	12.3162	0.000209211	6.7519e-05	1	0.566491	0.038167	weak
chr19	1103971	1103971	1	+	rs8178966	C	A	SNV	c(-5, 15)	ZNF263	jaspar2018	MA0528.1	MA0528.1	cgtggccgtgggaaaggaggAgcggaaagccgacgcgcgtc	0.754874	0.795804	8.59696	9.04447	0.000135739	2.56807e-05	1	0.447514	0.0396834	weak
chr9	123652898	123652898	1	+	rs881375	T	C	SNV	c(-5, 6)	PROX1	jaspar2018	MA0794.1	MA0794.1	acagacaaacaCgtctttaacac	0.753005	0.848731	11.5729	13.0358	0.000805438	7.79629e-05	1	1.46282	0.0953142	strong
chr6	32632903	32632903	1	+	rs9274413	G	C	SNV	c(-8, 5)	EGR1	jaspar2018	MA0162.2	MA0162.2	ccccgcagccgccCccctgacccggcc	0.804331	0.883628	9.49573	10.4217	0.000740699	8.87997e-05	1	0.925943	0.0785993	strong
chr17	37836353	37836353	1	+	rs9303274	T	C	SNV	c(-7, 5)	NFKB1	jaspar2018	MA0105.4	MA0105.4	ggggcaggggatTcagcctccacaa	0.800944	0.735744	15.4141	14.1668	8.56072e-05	0.000465065	1	-1.2473	-0.0648886	strong
chr11	61595564	61595564	1	-	rs968567	C	T	SNV	c(-4, 7)	ELF1	jaspar2018	MA0473.2	MA0473.2	ggccctgagctTccggggagttt	0.728496	0.861017	10.9744	12.947	0.00166816	7.09891e-05	1	1.97261	0.131369	strong
chr11	61595564	61595564	1	-	rs968567	C	T	SNV	c(-4, 7)	ELF4	jaspar2018	MA0641.1	MA0641.1	ggccctgagctTccggggagttt	0.727322	0.857182	10.9086	12.8319	0.00166816	7.28369e-05	1	1.92332	0.128675	strong
chr11	61595564	61595564	1	-	rs968567	C	T	SNV	c(-4, 5)	ELK1	jaspar2018	MA0028.2	MA0028.2	ccctgagctTccggggagt	0.756625	0.899932	10.201	12.1177	0.00154781	4.86374e-05	1	1.91665	0.142438	strong
chr11	61595564	61595564	1	-	rs968567	C	T	SNV	c(-4, 5)	ELK3	jaspar2018	MA0759.1	MA0759.1	ccctgagctTccggggagt	0.746787	0.932523	7.91577	9.85052	0.00396252	5.62668e-05	1	1.93474	0.183329	strong
chr11	61595564	61595564	1	+	rs968567	C	T	SNV	c(-5, 5)	ELK4	jaspar2018	MA0076.2	MA0076.2	gccctgagctTccggggagtt	0.797611	0.968338	9.4176	11.4137	0.00195146	3.02792e-05	1	1.9961	0.169392	strong
chr11	61595564	61595564	1	-	rs968567	C	T	SNV	c(-3, 5)	ELK4	jaspar2018	MA0076.1	MA0076.1	cctgagctTccggggag	0.765767	0.918255	8.41891	10.0581	0.00197601	6.86646e-05	1	1.63915	0.149875	strong
chr11	61595564	61595564	1	-	rs968567	C	T	SNV	c(-4, 5)	ERG	jaspar2018	MA0474.2	MA0474.2	ccctgagctTccggggagt	0.731435	0.921356	7.51224	9.44242	0.00662327	8.86917e-05	1	1.93018	0.188463	strong
chr11	61595564	61595564	1	-	rs968567	C	T	SNV	c(-4, 5)	ETS1	jaspar2018	MA0098.3	MA0098.3	ccctgagctTccggggagt	0.726865	0.918497	7.67245	9.66887	0.00655746	8.67844e-05	1	1.99643	0.189811	strong
chr11	61595564	61595564	1	-	rs968567	C	T	SNV	c(-4, 5)	ETV1	jaspar2018	MA0761.1	MA0761.1	ccctgagctTccggggagt	0.757184	0.94898	7.12158	8.89088	0.00535107	4.76837e-05	1	1.76931	0.188998	strong
chr11	61595564	61595564	1	-	rs968567	C	T	SNV	c(-4, 5)	ETV4	jaspar2018	MA0764.1	MA0764.1	ccctgagctTccggggagt	0.745203	0.955175	6.91446	8.82863	0.00720787	5.53131e-05	1	1.91416	0.207222	strong
chr11	61595564	61595564	1	-	rs968567	C	T	SNV	c(-4, 5)	ETV5	jaspar2018	MA0765.1	MA0765.1	ccctgagctTccggggagt	0.76401	0.976596	6.32202	8.04294	0.00795364	5.81741e-05	1	1.72092	0.209043	strong
chr11	61595564	61595564	1	-	rs968567	C	T	SNV	c(-4, 5)	FEV	jaspar2018	MA0156.2	MA0156.2	ccctgagctTccggggagt	0.736184	0.925799	7.648	9.59126	0.00574493	7.82013e-05	1	1.94325	0.187723	strong
chr11	61595564	61595564	1	-	rs968567	C	T	SNV	c(-4, 5)	FLI1	jaspar2018	MA0475.2	MA0475.2	ccctgagctTccggggagt	0.733506	0.900821	8.76047	10.7422	0.00384521	9.91821e-05	1	1.98176	0.166298	strong
chr11	61595564	61595564	1	-	rs968567	C	T	SNV	c(-6, 4)	Gabpa	jaspar2018	MA0062.2	MA0062.2	gccctgagctTccggggagtt	0.794627	0.957275	9.67288	11.6337	0.00151086	3.43323e-05	1	1.96085	0.161403	strong
chr11	61595564	61595564	1	-	rs968567	C	T	SNV	c(-4, 5)	GABPA	jaspar2018	MA0062.1	MA0062.1	ccctgagctTccggggagt	0.781658	0.937351	6.48153	7.70876	0.00191498	6.29425e-05	1	1.22723	0.149615	strong
chr11	61595564	61595564	1	-	rs968567	C	T	SNV	c(-2, 7)	Stat3	jaspar2018	MA0144.1	MA0144.1	ccctgagctTccggggagt	0.7984	0.923566	9.74443	11.2523	0.000714302	2.76566e-05	1	1.50783	0.123866	strong
chr11	61595564	61595564	1	-	rs968567	C	T	SNV	c(-6, 6)	ZBTB7A	jaspar2018	MA0750.2	MA0750.2	aggccctgagctTccggggagtttt	0.805507	0.957384	8.15053	9.64152	0.00109076	3.34978e-05	1	1.49099	0.148211	strong
chr5	100173844	100173844	1	+	rs10078934	A	T	SNV	c(-9, 5)	Nr2f6(var.2)	jaspar2018	MA0728.1	MA0728.1	ctgtgaaggacaggAtgtcagtgcctaga	0.754698	0.670752	17.8586	15.8748	7.72914e-05	0.000793423	1	-1.98377	-0.0838611	strong
chr5	100173844	100173844	1	+	rs10078934	A	T	SNV	c(-9, 8)	RARA	jaspar2018	MA0729.1	MA0729.1	ggactgtgaaggacaggAtgtcagtgcctagagta	0.734535	0.664113	19.0013	17.1833	6.3624e-05	0.000550091	1	-1.81804	-0.0703175	strong
chr5	100173844	100173844	1	+	rs10078934	A	T	SNV	c(-10, 5)	Rarb	jaspar2018	MA0857.1	MA0857.1	actgtgaaggacaggAtgtcagtgcctagag	0.7369	0.664135	18.5325	16.7094	6.65269e-05	0.000573114	1	-1.82311	-0.0725631	strong
chr2	62540968	62540968	1	+	rs10202783	A	T	SNV	c(-2, 8)	ESRRA	jaspar2018	MA0592.1	MA0592.1	ctgcgttggcAagggcagaga	0.896165	0.767656	11.4775	9.84359	8.32081e-05	0.00149417	1	-1.63394	-0.127674	strong
chr2	62540968	62540968	1	+	rs10202783	A	T	SNV	c(-5, 6)	Esrrb	jaspar2018	MA0141.1	MA0141.1	gctgcgttggcAagggcagagaa	0.901792	0.788295	10.5536	9.2394	8.29101e-05	0.00130522	1	-1.31415	-0.11241	strong
chr2	62540968	62540968	1	+	rs10202783	A	T	SNV	c(-5, 6)	Esrrb	jaspar2018	MA0141.2	MA0141.2	gctgcgttggcAagggcagagaa	0.902205	0.785626	10.7038	9.3346	8.18968e-05	0.0013839	1	-1.3692	-0.115521	strong
chr2	62540968	62540968	1	+	rs10202783	A	T	SNV	c(-6, 8)	Nr5a2	jaspar2018	MA0505.1	MA0505.1	gcagctgcgttggcAagggcagagaagat	0.897091	0.752358	11.8878	10.0032	6.91488e-05	0.00179266	1	-1.88466	-0.142476	strong
chr19	1026318	1026318	1	-	rs10422209	C	G	SNV	c(-7, 3)	Egr1	jaspar2018	MA0162.1	MA0162.1	gagccgcccaCgagctctgag	0.925083	0.767306	9.28569	7.73625	2.3365e-05	0.00158405	1	-1.54944	-0.154613	strong
chr19	1026318	1026318	1	+	rs10422209	C	G	SNV	c(-8, 5)	EGR1	jaspar2018	MA0162.3	MA0162.3	tgagagccgcccaCgagctctgagcag	0.811479	0.7031	14.9447	12.9588	8.71681e-05	0.00126146	1	-1.98595	-0.107936	strong
chr19	1026318	1026318	1	+	rs10422209	C	G	SNV	c(-10, 4)	EGR2	jaspar2018	MA0472.1	MA0472.1	gtgagagccgcccaCgagctctgagcaga	0.902965	0.731848	10.6362	8.64608	6.65784e-05	0.0040559	1	-1.99015	-0.169162	strong
chr19	1026318	1026318	1	+	rs10422209	C	G	SNV	c(-7, 3)	EGR2	jaspar2018	MA0472.2	MA0472.2	gagccgcccaCgagctctgag	0.875464	0.742112	12.1793	10.3358	4.48227e-05	0.00113153	1	-1.84357	-0.132621	strong
chr19	1026318	1026318	1	+	rs10422209	C	G	SNV	c(-9, 5)	EGR3	jaspar2018	MA0732.1	MA0732.1	gtgagagccgcccaCgagctctgagcaga	0.831852	0.71487	13.8736	11.9419	9.40682e-05	0.00151063	1	-1.93173	-0.116018	strong
chr12	9885961	9885961	1	-	rs10492165	A	G	SNV	c(-9, 4)	PLAG1	jaspar2018	MA0163.1	MA0163.1	ttttctcctatagGccacttcctcttt	0.748182	0.803509	10.6084	11.3755	0.000409327	8.55699e-05	1	0.767083	0.0544039	strong
chr12	9851808	9851808	1	-	rs10772046	G	T	SNV	c(-9, 6)	ZNF143	jaspar2018	MA0088.2	MA0088.2	ataccccattgcttgGtggggtgatcactct	0.81334	0.790033	15.8721	15.4189	4.77689e-05	9.43725e-05	1	-0.453191	-0.0232386	weak
chr2	219122090	219122090	1	+	rs10932766	G	A	SNV	c(-9, 4)	FOXF2	jaspar2018	MA0030.1	MA0030.1	tgttacatcataaAcattatgatgcct	0.783964	0.934017	9.23682	10.9611	0.00175055	6.63251e-05	1	1.72423	0.147128	strong
chr2	219122090	219122090	1	+	rs10932766	G	A	SNV	c(-4, 3)	FOXG1	jaspar2018	MA0613.1	MA0613.1	atcataaAcattatg	0.818156	0.973008	10.3129	12.2616	0.00161743	7.62939e-05	1	1.94869	0.154642	strong
chr2	219122090	219122090	1	+	rs10932766	G	A	SNV	c(-4, 3)	Foxj2	jaspar2018	MA0614.1	MA0614.1	atcataaAcattatg	0.788542	0.976832	8.37635	10.3643	0.00306702	7.62939e-05	1	1.98797	0.187386	strong
chr2	219122090	219122090	1	+	rs10932766	G	A	SNV	c(-6, 4)	FOXK2	jaspar2018	MA1103.1	MA1103.1	tacatcataaAcattatgatg	0.784304	0.960367	7.53718	9.19355	0.0030365	0.000118494	1	1.65638	0.173145	strong
chr2	219122090	219122090	1	+	rs10932766	G	A	SNV	c(-7, 2)	HOXC10	jaspar2018	MA0905.1	MA0905.1	acatcataaAcattatgat	0.819101	0.948678	7.62992	8.82228	0.00170422	8.96454e-05	1	1.19237	0.128287	strong
chr17	73333569	73333569	1	+	rs1109033	A	G	SNV	c(-14, -1)	Nfe2l2	jaspar2018	MA0150.2	MA0150.2	gaggatgaggctgcAcctacaaagattgt	0.838874	0.768358	11.784	10.8161	9.96795e-05	0.000616279	1	-0.967844	-0.0691541	strong
chr7	98740194	98740194	1	+	rs114015819	G	T	SNV	c(1, 17)	EWSR1-FLI1	jaspar2018	MA0149.1	MA0149.1	gcgagggggcggggctaGgcaggaatgagggcggg	0.718145	0.656068	22.1975	20.2876	2.46156e-05	0.000201204	1	-1.90988	-0.0618702	strong
chr16	11436069	11436069	1	-	rs11645146	G	A	SNV	c(-10, 3)	EGR1	jaspar2018	MA0162.2	MA0162.2	gactgagggggagGcatgtcaggcaga	0.943447	0.855413	11.1202	10.0922	1.0848e-05	0.00020403	1	-1.02798	-0.0872608	strong
chr16	11436069	11436069	1	+	rs11645146	G	A	SNV	c(-7, 13)	ZNF263	jaspar2018	MA0528.1	MA0528.1	tgagagcgactgagggggagGcatgtcaggcagagaacaaa	0.805708	0.757549	9.15276	8.6262	1.64538e-05	0.000122705	1	-0.52656	-0.0466928	weak
chr11	128453023	128453023	1	+	rs117021234	C	A	SNV	c(-4, 3)	Atf3	jaspar2018	MA0605.1	MA0605.1	gctgatgAcgcaggt	0.778061	0.969001	8.18103	10.169	0.00297546	1.52588e-05	1	1.98798	0.18948	strong
chr11	128453023	128453023	1	+	rs117021234	C	A	SNV	c(-7, 4)	CREB1	jaspar2018	MA0018.1	MA0018.1	tggtgctgatgAcgcaggtcaga	0.789904	0.969036	7.11102	8.68204	0.00279045	5.6982e-05	1	1.57102	0.175463	strong
chr11	128453023	128453023	1	+	rs117021234	C	A	SNV	c(-4, 5)	JUN::JUNB	jaspar2018	MA1132.1	MA1132.1	gtgctgatgAcgcaggtca	0.780083	0.967171	6.42358	7.91864	0.00323009	3.14713e-05	1	1.49506	0.182748	strong
chr11	128453023	128453023	1	-	rs117021234	C	A	SNV	c(-12, 8)	MAFF	jaspar2018	MA0495.2	MA0495.2	gctcccacgtggtgctgatgCcgcaggtcagaggacttcac	0.764306	0.698222	10.1832	9.35705	8.97972e-05	0.000588062	1	-0.82617	-0.0629232	strong
chr11	128453023	128453023	1	+	rs117021234	C	A	SNV	c(-12, 8)	MAFG	jaspar2018	MA0659.1	MA0659.1	gctcccacgtggtgctgatgCcgcaggtcagaggacttcac	0.836925	0.787204	11.1636	10.5228	2.04387e-05	0.000110819	1	-0.640832	-0.0483085	weak
chr11	128453023	128453023	1	-	rs117021234	C	A	SNV	c(-11, 7)	MAFK	jaspar2018	MA0496.2	MA0496.2	tcccacgtggtgctgatgCcgcaggtcagaggacttc	0.789239	0.726758	10.9167	10.091	4.30615e-05	0.000303788	1	-0.825623	-0.0602572	strong
chr11	128453023	128453023	1	+	rs117021234	C	A	SNV	c(1, 10)	RORB	jaspar2018	MA1150.1	MA1150.1	ggtgctgatgAcgcaggtcag	0.812897	0.925584	6.0431	6.85348	0.00150013	9.08375e-05	1	0.810378	0.109679	strong
chr17	32526597	32526597	1	-	rs117226476	A	G	SNV	c(-6, 5)	DBP	jaspar2018	MA0639.1	MA0639.1	cttccgtttatGtaaagtccttg	0.891789	0.934127	10.8063	11.318	0.000136435	5.00083e-05	1	0.511701	0.04224	weak
chr17	32526597	32526597	1	-	rs117226476	A	G	SNV	c(-6, 5)	HLF	jaspar2018	MA0043.2	MA0043.2	cttccgtttatGtaaagtccttg	0.917158	0.964852	9.06813	9.53621	0.000129342	2.95639e-05	1	0.468078	0.0473708	weak
chr17	32526597	32526597	1	+	rs117226476	A	G	SNV	c(-4, 6)	NFIL3	jaspar2018	MA0025.1	MA0025.1	ttccgtttatGtaaagtcctt	0.879723	0.981083	9.68234	10.7805	0.000110626	1.14441e-05	1	1.0982	0.0999682	strong
chr17	32526597	32526597	1	+	rs117226476	A	G	SNV	c(-5, 6)	POU2F1	jaspar2018	MA0785.1	MA0785.1	cttccgtttatGtaaagtccttg	0.774338	0.887731	7.97707	9.11662	0.00172317	9.75728e-05	1	1.13954	0.111231	strong
chr17	32526597	32526597	1	+	rs117226476	A	G	SNV	c(-4, 6)	POU5F1	jaspar2018	MA1115.1	MA1115.1	ttccgtttatGtaaagtcctt	0.799629	0.921721	7.33782	8.42216	0.00169563	7.98702e-05	1	1.08434	0.118931	strong
chr17	32526597	32526597	1	-	rs117226476	A	G	SNV	c(-6, 5)	TEF	jaspar2018	MA0843.1	MA0843.1	cttccgtttatGtaaagtccttg	0.834183	0.922435	10.7531	11.887	0.000397027	4.03523e-05	1	1.13392	0.0880124	strong
chr19	33726578	33726578	1	+	rs117710327	C	A	SNV	c(-2, 8)	EBF1	jaspar2018	MA0154.2	MA0154.2	gcaggggaggCcccagggact	0.963498	0.786318	10.9151	8.91561	7.62939e-06	0.00242281	1	-1.99953	-0.176527	strong
chr19	33726578	33726578	1	+	rs117710327	C	A	SNV	c(-3, 10)	EBF1	jaspar2018	MA0154.3	MA0154.3	gttgcaggggaggCcccagggactgtg	0.918624	0.782194	13.3699	11.4088	1.64434e-05	0.000585809	1	-1.96118	-0.134884	strong
chr19	33726578	33726578	1	+	rs117710327	C	A	SNV	c(-1, 8)	EBF1	jaspar2018	MA0154.1	MA0154.1	caggggaggCcccagggac	0.985261	0.854244	8.46081	7.35755	8.58307e-06	0.000706673	1	-1.10326	-0.128511	strong
chr19	33726578	33726578	1	+	rs117710327	C	A	SNV	c(-8, 4)	NFKB1	jaspar2018	MA0105.4	MA0105.4	ttgcaggggaggCcccagggactgt	0.889535	0.793294	17.1089	15.2678	5.90086e-06	0.000118047	1	-1.84113	-0.0957818	strong
chr19	33726578	33726578	1	+	rs117710327	C	A	SNV	c(-7, 3)	NFKB1	jaspar2018	MA0105.2	MA0105.2	gcaggggaggCcccagggact	0.950126	0.891789	10.9266	10.2696	5.96046e-06	5.22137e-05	1	-0.656986	-0.0571874	weak
chr19	33726578	33726578	1	+	rs117710327	C	A	SNV	c(-8, 4)	NFKB2	jaspar2018	MA0778.1	MA0778.1	ttgcaggggaggCcccagggactgt	0.926175	0.873247	13.8186	13.038	7.61449e-06	5.34058e-05	1	-0.780611	-0.0523641	strong
chr19	33726578	33726578	1	+	rs117710327	C	A	SNV	c(-5, 9)	TFAP2A	jaspar2018	MA0003.2	MA0003.2	agttgcaggggaggCcccagggactgtgg	0.899207	0.761451	9.62778	8.18862	6.70701e-05	0.00281357	1	-1.43915	-0.134742	strong
chr19	33726578	33726578	1	+	rs117710327	C	A	SNV	c(-5, 9)	TFAP2C	jaspar2018	MA0524.1	MA0524.1	agttgcaggggaggCcccagggactgtgg	0.979635	0.788621	10.4168	8.41766	5.07943e-06	0.0026723	1	-1.99917	-0.188069	strong
chr19	33726578	33726578	1	+	rs117710327	C	A	SNV	c(-5, 15)	ZNF263	jaspar2018	MA0528.1	MA0528.1	gagaagagttgcaggggaggAcccagggactgtgggtgctg	0.675714	0.774442	7.73143	8.81091	0.0017878	6.32929e-05	1	1.07948	0.0957232	strong
chr19	1082081	1082081	1	+	rs11878877	G	A	SNV	c(-2, 11)	PLAG1	jaspar2018	MA0163.1	MA0163.1	ctggcgcaagcggGggcctggggagga	0.842101	0.775568	11.9106	10.9881	2.41064e-05	0.00019379	1	-0.922458	-0.0654235	strong
chr19	1082081	1082081	1	-	rs11878877	G	A	SNV	c(-13, -1)	Tcfcp2l1	jaspar2018	MA0145.1	MA0145.1	ctggcgcaagcggGggcctggggagga	0.920989	0.837271	8.80089	8.01429	8.49478e-05	0.000699561	1	-0.786602	-0.0824247	strong
chr19	1082081	1082081	1	-	rs11878877	G	A	SNV	c(-13, -1)	Tcfcp2l1	jaspar2018	MA0145.2	MA0145.2	ctggcgcaagcggGggcctggggagga	0.920789	0.836279	8.82385	8.02755	8.42251e-05	0.00069638	1	-0.796303	-0.0832063	strong
chr19	1082081	1082081	1	-	rs11878877	G	A	SNV	c(-10, 9)	TP63	jaspar2018	MA0525.1	MA0525.1	gcaggactggcgcaagcggGggcctggggaggacagggt	0.919912	0.873758	10.1185	9.62582	1.97857e-05	0.00023588	1	-0.492674	-0.0448971	weak
chr19	1082081	1082081	1	-	rs11878877	G	A	SNV	c(-1, 12)	Zfx	jaspar2018	MA0146.1	MA0146.1	ctggcgcaagcggAggcctggggagga	0.917481	0.967857	10.5369	11.1061	0.000284724	3.38629e-05	1	0.569191	0.0496275	weak
chr19	1082081	1082081	1	-	rs11878877	G	A	SNV	c(-1, 12)	Zfx	jaspar2018	MA0146.2	MA0146.2	ctggcgcaagcggAggcctggggagga	0.91827	0.968281	10.5939	11.1616	0.000285927	3.35835e-05	1	0.567716	0.0492739	weak
chr16	11439303	11439303	1	-	rs12149160	G	T	SNV	c(-9, 4)	EGR1	jaspar2018	MA0162.2	MA0162.2	ggaaagcggaggcGgggcggaagggtg	0.919412	0.789619	10.8395	9.32394	2.39275e-05	0.00102242	1	-1.51559	-0.128652	strong
chr16	11439303	11439303	1	+	rs12149160	G	T	SNV	c(-13, 6)	Pax5	jaspar2018	MA0014.1	MA0014.1	ttggcgggaaagcggaggcGgggcggaagggtgcggcga	0.862811	0.754981	5.56157	4.91676	8.41219e-05	0.00374983	1	-0.644813	-0.101037	weak
chr16	11439303	11439303	1	+	rs12149160	G	T	SNV	c(1, 13)	PLAG1	jaspar2018	MA0163.1	MA0163.1	ggaaagcggaggcGgggcggaagggtg	0.865081	0.749087	12.2292	10.621	1.04271e-05	0.000400908	1	-1.60822	-0.11406	strong
chr16	11439303	11439303	1	-	rs12149160	G	T	SNV	c(-6, 4)	SP1	jaspar2018	MA0079.3	MA0079.3	aagcggaggcGgggcggaagg	0.94475	0.837014	11.0264	9.77539	2.07424e-05	0.000844955	1	-1.25103	-0.107219	strong
chr16	11439303	11439303	1	-	rs12149160	G	T	SNV	c(-10, 4)	SP2	jaspar2018	MA0516.1	MA0516.1	gggaaagcggaggcGgggcggaagggtgc	0.959787	0.834574	11.1269	9.69608	5.15208e-06	0.000665718	1	-1.43078	-0.123488	strong
chr10	35416513	35416513	1	-	rs12765038	G	C	SNV	c(-3, 7)	Nkx2-5(var.2)	jaspar2018	MA0503.1	MA0503.1	cctcggatttGagtgccccca	0.971794	0.79918	10.6965	8.80878	1.85966e-05	0.00244784	1	-1.88774	-0.171535	strong
chr18	67556685	67556685	1	+	rs12964890	T	C	SNV	c(-9, 1)	FOXH1	jaspar2018	MA0479.1	MA0479.1	tctaaattcaCaggagtggga	0.776924	0.935451	9.83623	11.8345	0.00175166	4.69685e-05	1	1.99825	0.157988	strong
chr6	41985229	41985229	1	+	rs13204359	C	T	SNV	c(-3, 7)	FOXA1	jaspar2018	MA0148.1	MA0148.1	aatgtcttgtTtccacaaagg	0.774518	0.929693	8.19202	9.81027	0.00282979	0.000106573	1	1.61824	0.153483	strong
chr6	41985229	41985229	1	+	rs13204359	C	T	SNV	c(-6, 4)	Foxo1	jaspar2018	MA0480.1	MA0480.1	aatgtcttgtTtccacaaagg	0.761116	0.930869	9.01918	11.0139	0.00312376	7.65324e-05	1	1.99477	0.168672	strong
chr6	41985229	41985229	1	-	rs13204359	C	T	SNV	c(-11, 2)	Mecom	jaspar2018	MA0029.1	MA0029.1	aaaaatgtcttgtCtccacaaaggctt	0.829065	0.73981	11.871	10.6172	8.74214e-05	0.000849929	1	-1.25379	-0.0878483	strong
chr6	41985229	41985229	1	+	rs13204359	C	T	SNV	c(-3, 6)	NFATC3	jaspar2018	MA0625.1	MA0625.1	atgtcttgtTtccacaaag	0.761126	0.985206	5.92107	7.61366	0.00777435	0.000104904	1	1.69258	0.219093	strong
chr19	1180623	1180623	1	+	rs546848243	C	T	SNV	c(-2, 5)	EHF	jaspar2018	MA0598.1	MA0598.1	ggggcacTtcctccc	0.844456	0.99817	10.9419	12.9332	0.00106812	4.57764e-05	1	1.99129	0.153685	strong
chr19	1180623	1180623	1	-	rs546848243	C	T	SNV	c(-3, 9)	ELF1	jaspar2018	MA0473.1	MA0473.1	cagagggggcacTtcctccctgcca	0.77216	0.938465	9.42226	11.4212	0.00205338	3.08454e-05	1	1.9989	0.164373	strong
chr19	1180623	1180623	1	+	rs546848243	C	T	SNV	c(-3, 5)	ELF5	jaspar2018	MA0136.1	MA0136.1	gggggcacTtcctccct	0.896964	0.982246	6.16379	6.73442	0.00413513	6.86646e-05	1	0.570632	0.0832649	weak
chr19	1180623	1180623	1	-	rs546848243	C	T	SNV	c(-4, 6)	Erg	jaspar2018	MA0474.1	MA0474.1	gagggggcacTtcctccctgc	0.802521	0.960009	9.53839	11.3924	0.00159955	4.41074e-05	1	1.85397	0.15628	strong
chr19	1180623	1180623	1	+	rs546848243	C	T	SNV	c(-5, 9)	Ets1	jaspar2018	MA0098.2	MA0098.2	ggcagagggggcacTtcctccctgccagc	0.814123	0.908716	9.56089	10.6516	0.000838719	6.52336e-05	1	1.09075	0.0931928	strong
chr19	1180623	1180623	1	-	rs546848243	C	T	SNV	c(-3, 6)	ETV6	jaspar2018	MA0645.1	MA0645.1	agggggcacTtcctccctg	0.785332	0.951907	8.84344	10.6937	0.0025053	6.29425e-05	1	1.85022	0.164789	strong
chr19	1180623	1180623	1	-	rs546848243	C	T	SNV	c(-2, 15)	EWSR1-FLI1	jaspar2018	MA0149.1	MA0149.1	ccaggcagagggggcacTtcctccctgccagccct	0.681487	0.734711	21.0696	22.7072	6.58403e-05	9.68952e-06	1	1.63752	0.053047	strong
chr19	1180623	1180623	1	-	rs546848243	C	T	SNV	c(-4, 6)	FLI1	jaspar2018	MA0475.1	MA0475.1	gagggggcacTtcctccctgc	0.782146	0.930393	8.99138	10.6755	0.00226378	5.84126e-05	1	1.68416	0.146879	strong
chr19	1180623	1180623	1	-	rs546848243	C	T	SNV	c(-4, 10)	Spi1	jaspar2018	MA0080.3	MA0080.3	ggcagagggggcacTtcctccctgccagc	0.775948	0.945888	9.32391	11.3236	0.00147489	1.96043e-06	1	1.99974	0.167197	strong
chr19	1180623	1180623	1	-	rs546848243	C	T	SNV	c(-2, 4)	SPI1	jaspar2018	MA0080.2	MA0080.2	gggcacTtcctcc	0.796793	1	6.34049	7.92911	0.00280762	0	1	1.58862	0.200353	strong
chr2	102984279	102984279	1	-	rs1420098	T	C	SNV	c(-4, 10)	Stat6	jaspar2018	MA0520.1	MA0520.1	actttactaatcttCtgaagaatcttgta	0.841961	0.961908	10.5658	12.059	0.000458207	2.71834e-05	1	1.49326	0.119144	strong
chr2	135062329	135062329	1	-	rs1439113	T	G	SNV	c(-5, 12)	TP63	jaspar2018	MA0525.2	MA0525.2	atagcctgattttttgtGttttaacatgtcttgct	0.662408	0.754718	14.386	16.3826	0.00115039	8.13216e-05	1	1.99663	0.0920614	strong
chr22	37562736	37562736	1	+	rs147908781	C	T	SNV	c(-3, 15)	CTCF	jaspar2018	MA0139.1	MA0139.1	aggtgggcccagaagttgCcaccagagggcagtgcgc	0.961026	0.882121	13.2313	12.1666	8.78208e-08	1.21163e-05	1	-1.06471	-0.0773926	strong
chr22	37562736	37562736	1	-	rs147908781	C	T	SNV	c(-6, 12)	Nr1h3::Rxra	jaspar2018	MA0494.1	MA0494.1	aggtgggcccagaagttgTcaccagagggcagtgcgc	0.790224	0.835449	8.3314	8.79793	0.000304343	7.4033e-05	1	0.466529	0.0444508	weak
chr19	1039923	1039923	1	-	rs149603637	G	A	SNV	c(-5, 15)	MAFF	jaspar2018	MA0495.2	MA0495.2	cgggcactccgccaccctacGgtgatgcagcaagagccgcg	0.759897	0.691061	10.1281	9.26753	0.000103752	0.000715237	1	-0.860569	-0.0655432	strong
chr2	103060024	103060024	1	-	rs1558650	T	A	SNV	c(-6, 3)	Myb	jaspar2018	MA0100.2	MA0100.2	agcagacagTtgtactgac	0.950355	0.825583	11.5149	10.0062	6.77109e-05	0.000972748	1	-1.50877	-0.124535	strong
chr2	103060024	103060024	1	+	rs1558650	T	A	SNV	c(-7, 5)	TWIST1	jaspar2018	MA1123.1	MA1123.1	ttgagcagacagAtgtactgaccca	0.827989	0.952759	8.63771	9.91347	0.000937045	7.48187e-05	1	1.27577	0.122711	strong
chr2	103060024	103060024	1	+	rs1558650	T	A	SNV	c(-7, 5)	ZBTB18	jaspar2018	MA0698.1	MA0698.1	ttgagcagacagAtgtactgaccca	0.833782	0.919638	11.78	12.982	0.000288352	4.01735e-05	1	1.202	0.085205	strong
chr5	96212095	96212095	1	+	rs17524572	C	T	SNV	c(-3, 9)	ZNF24	jaspar2018	MA1124.1	MA1124.1	ttatcctaagctTcattcacacctg	0.726295	0.81987	11.4834	12.9186	0.000433818	3.02643e-05	1	1.43512	0.0915191	strong
chr19	1104273	1104273	1	+	rs183015432	G	A	SNV	c(-11, 2)	GLIS3	jaspar2018	MA0737.1	MA0737.1	cccacccccggccAggcacggacgcgg	0.733166	0.778156	14.1926	15.0608	0.000306759	8.53091e-05	1	0.868116	0.0448838	strong
chr19	1104273	1104273	1	-	rs183015432	G	A	SNV	c(-11, -1)	INSM1	jaspar2018	MA0155.1	MA0155.1	cacccccggccAggcacggacgc	0.824371	0.895421	8.88294	9.63726	0.000513375	5.98431e-05	1	0.754326	0.0701859	strong
chr19	1104273	1104273	1	+	rs183015432	G	A	SNV	c(-11, 2)	ZIC1	jaspar2018	MA0696.1	MA0696.1	cccacccccggccGggcacggacgcgg	0.886425	0.768185	14.7977	12.8381	5.12227e-06	0.000242848	1	-1.95961	-0.117482	strong
chr19	1104273	1104273	1	+	rs183015432	G	A	SNV	c(-11, 3)	ZIC3	jaspar2018	MA0697.1	MA0697.1	ccccacccccggccGggcacggacgcggg	0.912535	0.796284	13.5589	11.853	2.95043e-06	0.000172866	1	-1.70592	-0.114936	strong
chr19	1104273	1104273	1	+	rs183015432	G	A	SNV	c(-11, 3)	ZIC4	jaspar2018	MA0751.1	MA0751.1	ccccacccccggccGggcacggacgcggg	0.914829	0.78811	10.1984	8.81641	1.04485e-05	0.000672632	1	-1.38203	-0.124202	strong
chr10	64028538	64028538	1	-	rs1864836	C	G	SNV	c(-11, 3)	SP2	jaspar2018	MA0516.1	MA0516.1	acgcgcagtgggcgGgccttgcgctctgc	0.770192	0.939832	8.9604	10.8988	0.00231312	1.60979e-05	1	1.93844	0.167303	strong
chr10	64028538	64028538	1	-	rs1864836	C	G	SNV	c(-11, 2)	ZIC1	jaspar2018	MA0696.1	MA0696.1	cgcgcagtgggcgGgccttgcgctctg	0.705955	0.808169	11.8068	13.5008	0.00116359	7.66665e-05	1	1.69399	0.101558	strong
chr10	64028538	64028538	1	-	rs1864836	C	G	SNV	c(-12, 2)	ZIC3	jaspar2018	MA0697.1	MA0697.1	acgcgcagtgggcgGgccttgcgctctgc	0.729476	0.83525	10.8726	12.4248	0.000952828	5.28283e-05	1	1.55219	0.104578	strong
chr10	64028538	64028538	1	-	rs1864836	C	G	SNV	c(-12, 2)	ZIC4	jaspar2018	MA0751.1	MA0751.1	acgcgcagtgggcgGgccttgcgctctgc	0.773559	0.870276	8.65772	9.71253	0.000958033	6.10221e-05	1	1.05482	0.0947952	strong
chr19	1205498	1205498	1	+	rs556466452	G	A	SNV	c(-8, 5)	Zfx	jaspar2018	MA0146.2	MA0146.2	aggtcacagccgtGgcctcgtctcccc	0.978975	0.826447	11.283	9.55152	1.27479e-05	0.00101464	1	-1.73144	-0.150277	strong
chr19	1205498	1205498	1	+	rs556466452	G	A	SNV	c(-8, 5)	Zfx	jaspar2018	MA0146.1	MA0146.1	aggtcacagccgtGgcctcgtctcccc	0.978841	0.827271	11.2302	9.51763	1.2815e-05	0.00101272	1	-1.71256	-0.149318	strong
chr14	69261472	69261472	1	-	rs2236262	A	G	SNV	c(-8, 6)	Sox11	jaspar2018	MA0869.1	MA0869.1	ttttttaaaactgcAtttcttatttattc	0.770717	0.69695	20.3354	18.3929	2.78298e-05	0.000251557	1	-1.94255	-0.0736559	strong
chr14	69261472	69261472	1	-	rs2236262	A	G	SNV	c(-8, 7)	SOX4	jaspar2018	MA0867.1	MA0867.1	tttttttaaaactgcAtttcttatttattcg	0.780417	0.713865	21.2848	19.4759	1.97119e-05	0.000129271	1	-1.80896	-0.0663756	strong
chr10	75558867	75558867	1	-	rs2271271	G	A	SNV	c(-8, 12)	MAFG	jaspar2018	MA0659.1	MA0659.1	gctcaccagtggttctggctGtatgagcaaactgcaggtgg	0.792045	0.737517	10.5852	9.88237	9.52814e-05	0.000475003	1	-0.702787	-0.0529788	strong
chr20	62327582	62327582	1	+	rs2297441	G	A	SNV	c(-8, 1)	HOXB13	jaspar2018	MA0901.1	MA0901.1	tctaataaaActgctggca	0.895343	0.942723	9.75448	10.2648	0.000177383	3.71933e-05	1	0.510315	0.0468966	weak
chr20	62327582	62327582	1	+	rs2297441	G	A	SNV	c(-8, 1)	HOXD13	jaspar2018	MA0909.1	MA0909.1	tctaataaaActgctggca	0.913551	0.985733	9.74842	10.5116	0.000173569	4.76837e-06	1	0.763229	0.0715807	strong
chr12	6535544	6535544	1	-	rs2364490	C	G	SNV	c(-6, 4)	E2F1	jaspar2018	MA0024.2	MA0024.2	tggacttcccGcccaggcttc	0.815936	0.996166	9.00913	10.9977	0.00240946	1.66893e-06	1	1.98858	0.180124	strong
chr12	6535544	6535544	1	+	rs2364490	C	G	SNV	c(-5, 9)	E2F3	jaspar2018	MA0469.1	MA0469.1	tccttggacttcccGcccaggcttctctg	0.873189	0.974042	11.2908	12.5769	0.00026626	5.63078e-06	1	1.28614	0.0996392	strong
chr12	6535544	6535544	1	-	rs2364490	C	G	SNV	c(-7, 3)	E2F4	jaspar2018	MA0470.1	MA0470.1	tggacttcccGcccaggcttc	0.831867	0.999648	9.92534	11.9186	0.000762463	1.19209e-06	1	1.99322	0.167178	strong
chr12	6535544	6535544	1	-	rs2364490	C	G	SNV	c(-7, 3)	E2F6	jaspar2018	MA0471.1	MA0471.1	tggacttcccGcccaggcttc	0.942984	0.998929	11.2776	11.9444	8.58307e-05	7.15256e-07	1	0.666787	0.0557645	weak
chr12	6535544	6535544	1	+	rs2364490	C	G	SNV	c(-6, 5)	E2F8	jaspar2018	MA0865.1	MA0865.1	ttggacttcccGcccaggcttct	0.727378	0.791658	14.2901	15.545	0.000356317	4.6134e-05	1	1.25491	0.0639857	strong
chr12	6535544	6535544	1	-	rs2364490	C	G	SNV	c(-12, 3)	Hnf4a	jaspar2018	MA0114.3	MA0114.3	atccttggacttcccCcccaggcttctctga	0.77387	0.721014	15.5166	14.4646	9.05651e-05	0.000409163	1	-1.05206	-0.0525569	strong
chr12	6535544	6535544	1	+	rs2364490	C	G	SNV	c(-5, 9)	SP2	jaspar2018	MA0516.1	MA0516.1	tccttggacttcccGcccaggcttctctg	0.836097	0.900102	9.71349	10.4449	0.000641164	9.65344e-05	1	0.731366	0.0631229	strong
chr12	6535544	6535544	1	+	rs2364490	C	G	SNV	c(-3, 8)	TFAP2A(var.2)	jaspar2018	MA0810.1	MA0810.1	ttggacttcccCcccaggcttct	0.962229	0.74475	8.42528	6.54482	4.05908e-05	0.00781178	1	-1.88046	-0.214864	strong
chr12	6535544	6535544	1	+	rs2364490	C	G	SNV	c(-5, 9)	TFAP2C	jaspar2018	MA0524.1	MA0524.1	tccttggacttcccCcccaggcttctctg	0.951417	0.760403	10.1215	8.12233	3.31765e-05	0.00434945	1	-1.99917	-0.188069	strong
chr12	6535544	6535544	1	-	rs2364490	C	G	SNV	c(-7, 3)	TFDP1	jaspar2018	MA1122.1	MA1122.1	tggacttcccGcccaggcttc	0.850353	0.999375	8.58507	10.0571	0.000565767	1.43051e-06	1	1.47208	0.146282	strong
chr12	6535544	6535544	1	+	rs2364490	C	G	SNV	c(-4, 5)	ZNF740	jaspar2018	MA0753.1	MA0753.1	ggacttcccCcccaggctt	0.96662	0.813378	10.8812	9.1785	1.52588e-05	0.000817299	1	-1.70266	-0.15132	strong
chr18	12775851	12775851	1	+	rs2542147	G	T	SNV	c(-4, 6)	FOXA1	jaspar2018	MA0148.1	MA0148.1	cggctgtgttTgcagtttttt	0.838716	0.954351	8.86152	10.0674	0.000622511	3.91006e-05	1	1.20589	0.114374	strong
chr18	12775851	12775851	1	+	rs2542147	G	T	SNV	c(-4, 6)	FOXA1	jaspar2018	MA0148.2	MA0148.2	cggctgtgttTgcagtttttt	0.838519	0.953791	8.92995	10.1429	0.000620842	3.95775e-05	1	1.21291	0.114112	strong
chr18	12775851	12775851	1	-	rs2542147	G	T	SNV	c(-1, 8)	Myb	jaspar2018	MA0100.2	MA0100.2	ggctgtgttGgcagttttt	0.987043	0.847883	11.9586	10.2758	2.28882e-05	0.000581741	1	-1.68278	-0.138897	strong
chr8	11324482	11324482	1	+	rs2618432	C	T	SNV	c(-3, 9)	TWIST1	jaspar2018	MA1123.1	MA1123.1	cttcgccaaaccCcagatgaaacca	0.954162	0.900067	9.92782	9.3747	6.39558e-05	0.000243723	1	-0.553119	-0.0532023	weak
chr19	49217520	49217520	1	-	rs281387	T	C	SNV	c(-12, 5)	EWSR1-FLI1	jaspar2018	MA0149.1	MA0149.1	tcaaggcttcctaccgcCggtcctcgcccccacac	0.627191	0.680415	19.3992	21.0367	0.00038561	7.01146e-05	1	1.63752	0.053047	strong
chr19	1173554	1173554	1	+	rs55961439	A	G	SNV	c(-3, 13)	NR1H2::RXRA	jaspar2018	MA0115.1	MA0115.1	cgctgcggggccgagaGggcaagggtcctggga	0.649998	0.725256	14.9598	16.6576	0.000820121	9.39832e-05	1	1.6978	0.0742833	strong
chr19	1173554	1173554	1	+	rs55961439	A	G	SNV	c(-3, 11)	NR2C2	jaspar2018	MA0504.1	MA0504.1	ctgcggggccgagaGggcaagggtcctgg	0.704317	0.816345	9.07677	10.5059	0.00159597	6.76615e-05	1	1.42914	0.111228	strong
chr19	1173554	1173554	1	-	rs55961439	A	G	SNV	c(-2, 11)	NR2F1	jaspar2018	MA0017.1	MA0017.1	tgcggggccgagaGggcaagggtcctg	0.801428	0.850242	8.08546	8.5593	0.000296768	7.09482e-05	1	0.473839	0.0473224	weak
chr19	1173554	1173554	1	+	rs55961439	A	G	SNV	c(-10, 3)	PLAG1	jaspar2018	MA0163.1	MA0163.1	tgcggggccgagaGggcaagggtcctg	0.734447	0.850441	10.418	12.0262	0.000584498	1.80267e-05	1	1.60822	0.11406	strong
chr19	1173554	1173554	1	+	rs55961439	A	G	SNV	c(-5, 14)	PPARG::RXRA	jaspar2018	MA0065.1	MA0065.1	ctgcgctgcggggccgagaGggcaagggtcctgggaccg	0.682665	0.775538	13.4421	15.2407	0.000769945	5.30284e-05	1	1.7986	0.0918225	strong
chr19	1173554	1173554	1	+	rs55961439	A	G	SNV	c(-8, 4)	TFAP2A(var.3)	jaspar2018	MA0872.1	MA0872.1	gcggggccgagaGggcaagggtcct	0.849967	0.909888	10.5053	11.2329	0.000340417	6.30021e-05	1	0.727564	0.0590219	strong
chr19	1173554	1173554	1	-	rs55961439	A	G	SNV	c(-8, 4)	TFAP2B(var.3)	jaspar2018	MA0813.1	MA0813.1	gcggggccgagaGggcaagggtcct	0.860888	0.926636	10.79	11.6054	0.000280574	3.40194e-05	1	0.815426	0.0651545	strong
chr19	1173554	1173554	1	-	rs55961439	A	G	SNV	c(-8, 4)	TFAP2C(var.3)	jaspar2018	MA0815.1	MA0815.1	gcggggccgagaGggcaagggtcct	0.837758	0.901537	10.6523	11.4542	0.000381753	8.07792e-05	1	0.801947	0.0631839	strong
chr19	1021304	1021304	1	+	rs34277975	C	T	SNV	c(-11, 4)	ZNF143	jaspar2018	MA0088.2	MA0088.2	ttggcacccacaatcCaccgcggctatgagg	0.912739	0.810151	17.8048	15.8101	1.18534e-06	5.27618e-05	1	-1.9948	-0.102289	strong
chr5	35815846	35815846	1	-	rs35081631	G	A	SNV	c(-1, 11)	TFAP2A(var.3)	jaspar2018	MA0872.1	MA0872.1	ctgttcttgctcGccctacaggctg	0.904328	0.831133	11.1654	10.2766	8.69483e-05	0.000649855	1	-0.88875	-0.0720977	strong
chr5	35815846	35815846	1	+	rs35081631	G	A	SNV	c(-1, 11)	TFAP2B(var.3)	jaspar2018	MA0813.1	MA0813.1	ctgttcttgctcGccctacaggctg	0.93142	0.857202	11.6647	10.7443	2.78652e-05	0.000308871	1	-0.920468	-0.0735476	strong
chr5	35815846	35815846	1	+	rs35081631	G	A	SNV	c(-1, 11)	TFAP2C(var.3)	jaspar2018	MA0815.1	MA0815.1	ctgttcttgctcGccctacaggctg	0.902308	0.824912	11.4639	10.4907	7.70837e-05	0.00063093	1	-0.973166	-0.0766739	strong
chr19	1180695	1180695	1	-	rs371552790	A	T	SNV	c(-6, 5)	HINFP	jaspar2018	MA0131.2	MA0131.2	ttccccagcggAcgggcctggga	0.95616	0.784006	11.0963	9.1159	4.3273e-05	0.00175869	1	-1.98035	-0.170712	strong
chr12	6493094	6493094	1	+	rs3759335	C	T	SNV	c(-5, 6)	HINFP	jaspar2018	MA0131.2	MA0131.2	ctgaccccgggTccgccgccctt	0.754479	0.926633	8.77624	10.7566	0.0029496	6.71744e-05	1	1.98035	0.170712	strong
chr12	6493094	6493094	1	+	rs3759335	C	T	SNV	c(-2, 12)	SP2	jaspar2018	MA0516.1	MA0516.1	gggctgaccccgggCccgccgcccttccc	0.918227	0.847428	10.652	9.84296	4.27086e-05	0.000478707	1	-0.808998	-0.0698232	strong
chr14	103367708	103367708	1	-	rs3783386	C	T	SNV	c(-10, 7)	KLF13	jaspar2018	MA0657.1	MA0657.1	tgctaagttacaaagggCgtctctcagacctctgt	0.805901	0.700665	14.4631	12.6038	6.62431e-05	0.00117357	1	-1.85939	-0.103919	strong
chr14	103367708	103367708	1	-	rs3783386	C	T	SNV	c(-6, 4)	KLF4	jaspar2018	MA0039.3	MA0039.3	ttacaaagggTgtctctcaga	0.863173	0.961617	8.64097	9.60305	0.00033617	5.55515e-05	1	0.962072	0.0964179	strong
chr10	75757702	75757702	1	-	rs3812625	A	G	SNV	c(-6, 4)	EBF1	jaspar2018	MA0154.2	MA0154.2	cccctcccttGggaatggggg	0.796487	0.970917	9.03037	10.9989	0.00205088	4.05312e-06	1	1.96849	0.173787	strong
chr10	75757702	75757702	1	-	rs3812625	A	G	SNV	c(-8, 5)	EBF1	jaspar2018	MA0154.3	MA0154.3	aggcccctcccttGggaatgggggagg	0.846846	0.981954	12.3381	14.2803	0.000163995	1.42306e-06	1	1.94216	0.133576	strong
chr10	75757702	75757702	1	-	rs3812625	A	G	SNV	c(-6, 3)	EBF1	jaspar2018	MA0154.1	MA0154.1	ccctcccttGggaatgggg	0.914633	0.990277	7.86607	8.50305	0.000188828	3.8147e-06	1	0.636979	0.0741974	weak
chr10	75757702	75757702	1	-	rs3812625	A	G	SNV	c(-3, 8)	TEAD1	jaspar2018	MA0090.1	MA0090.1	gcccctcccttAggaatggggga	0.91129	0.87032	9.64271	9.22129	6.30617e-05	0.000169396	1	-0.421421	-0.0399255	weak
chr2	62533045	62533045	1	+	rs3924500	G	A	SNV	c(-3, 8)	PBX2	jaspar2018	MA1113.1	MA1113.1	gcagtcacaagAatgacatgatt	0.777531	0.931421	8.07489	9.62135	0.00160182	4.91738e-05	1	1.54646	0.149989	strong
chr16	50369763	50369763	1	+	rs4347626	C	G	SNV	c(-6, 7)	BATF3	jaspar2018	MA0835.1	MA0835.1	gtgcagatggtgaCatcctcaccaaca	0.766519	0.680538	16.9972	15.1048	6.67982e-05	0.000737727	1	-1.89239	-0.0854892	strong
chr5	35831103	35831103	1	-	rs56123112	A	C	SNV	c(-5, 5)	RUNX1	jaspar2018	MA0002.2	MA0002.2	tttccaagccAcagtcccagt	0.956877	0.845734	8.59571	7.61636	6.17504e-05	0.00118279	1	-0.979348	-0.109111	strong
chr10	112225201	112225201	1	+	rs4918520	C	A	SNV	c(-3, 10)	EGR1	jaspar2018	MA0162.2	MA0162.2	aaggctcatgcaaCctccccctcctgg	0.949264	0.868712	11.1881	10.2475	8.08015e-06	0.000145067	1	-0.940601	-0.0798435	strong
chr10	112225201	112225201	1	-	rs4918520	C	A	SNV	c(-8, 4)	POU2F2	jaspar2018	MA0507.1	MA0507.1	aggctcatgcaaActccccctcctg	0.749557	0.89266	10.5093	12.5036	0.00235927	0.00010708	1	1.99434	0.142458	strong
chr10	112225201	112225201	1	+	rs4918520	C	A	SNV	c(-8, 2)	POU5F1	jaspar2018	MA1115.1	MA1115.1	gctcatgcaaActccccctcc	0.830809	0.991414	7.61474	9.04112	0.00115943	3.21865e-05	1	1.42638	0.156447	strong
chr10	75560649	75560649	1	-	rs537530036	C	T	SNV	c(-13, 2)	GLIS1	jaspar2018	MA0735.1	MA0735.1	tgcgtgcgcggggggTggagggttacctcag	0.670303	0.751821	16.2218	18.1896	0.000857101	9.10049e-05	1	1.96779	0.0813793	strong
chr10	75560649	75560649	1	-	rs537530036	C	T	SNV	c(-12, 1)	GLIS2	jaspar2018	MA0736.1	MA0736.1	cgtgcgcggggggTggagggttacctc	0.879269	0.924744	13.1041	13.7769	2.39834e-05	4.12762e-06	1	0.672804	0.0451841	weak
chr10	75560649	75560649	1	-	rs537530036	C	T	SNV	c(-9, 5)	SP2	jaspar2018	MA0516.1	MA0516.1	gcgtgcgcggggggCggagggttacctca	0.90685	0.851546	10.522	9.89002	7.21868e-05	0.000427512	1	-0.631946	-0.0545422	weak
chr10	75560649	75560649	1	-	rs537530036	C	T	SNV	c(-7, 3)	SP3	jaspar2018	MA0746.1	MA0746.1	gcgcggggggTggagggttac	0.873538	0.949903	7.45644	8.08998	0.000433445	4.19617e-05	1	0.633544	0.0744856	weak
chr10	75560649	75560649	1	-	rs537530036	C	T	SNV	c(-8, 3)	SP8	jaspar2018	MA0747.1	MA0747.1	tgcgcggggggTggagggttacc	0.817905	0.907652	7.94942	8.80484	0.000603735	4.95911e-05	1	0.855425	0.0883241	strong
chr12	68420050	68420050	1	+	rs545951319	A	G	SNV	c(-2, 7)	HOXD13	jaspar2018	MA0909.1	MA0909.1	ttgaccaatAataaaagga	0.947721	0.905133	10.1097	9.6594	5.91278e-05	0.000224113	1	-0.450316	-0.0422337	weak
chr19	1192804	1192804	1	+	rs555338623	G	C	SNV	c(-7, 3)	EGR2	jaspar2018	MA0472.2	MA0472.2	atgttgcccaCgctggtttca	0.727899	0.861251	10.1393	11.9829	0.00141072	6.98566e-05	1	1.84357	0.132621	strong
chr19	1192804	1192804	1	-	rs555338623	G	C	SNV	c(-8, 5)	Rfx1	jaspar2018	MA0509.1	MA0509.1	actatgttgcccaGgctggtttcaaac	0.833021	0.70134	10.7654	9.09521	9.56617e-05	0.0026564	1	-1.67016	-0.129638	strong
chr6	159421183	159421183	1	+	rs56278154	C	A	SNV	c(-9, 1)	CDX2	jaspar2018	MA0465.1	MA0465.1	cccgcgataaAacgcccctgg	0.787664	0.950834	9.67447	11.6666	0.00174546	5.126e-05	1	1.99214	0.1624	strong
chr6	159421183	159421183	1	+	rs56278154	C	A	SNV	c(-8, 2)	HOXA10	jaspar2018	MA0899.1	MA0899.1	cccgcgataaAacgcccctgg	0.796609	0.954384	5.88715	7.01209	0.00410151	8.36849e-05	1	1.12493	0.153316	strong
chr6	159421183	159421183	1	+	rs56278154	C	A	SNV	c(-7, 2)	HOXB13	jaspar2018	MA0901.1	MA0901.1	ccgcgataaAacgcccctg	0.758255	0.911951	8.27794	9.93336	0.00292683	0.000102043	1	1.65542	0.152129	strong
chr6	159421183	159421183	1	+	rs56278154	C	A	SNV	c(-7, 2)	HOXD13	jaspar2018	MA0909.1	MA0909.1	ccgcgataaAacgcccctg	0.74846	0.934648	8.0028	9.97148	0.00474644	8.10623e-05	1	1.96868	0.184636	strong
chr6	159421183	159421183	1	+	rs56278154	C	A	SNV	c(-4, 13)	KLF13	jaspar2018	MA0657.1	MA0657.1	ggctgcccccgcgataaCacgcccctggcagccag	0.867195	0.808344	15.5461	14.5063	7.61959e-06	6.14497e-05	1	-1.03982	-0.0581143	strong
chr6	159421183	159421183	1	+	rs56278154	C	A	SNV	c(-3, 10)	KLF14	jaspar2018	MA0740.1	MA0740.1	gcccccgcgataaCacgcccctggcag	0.917996	0.831888	12.8219	11.6304	1.7345e-05	0.000205364	1	-1.19145	-0.0853689	strong
chr6	159421183	159421183	1	+	rs56278154	C	A	SNV	c(-2, 8)	KLF16	jaspar2018	MA0741.1	MA0741.1	cccgcgataaCacgcccctgg	0.915303	0.790398	10.4495	9.03997	4.79221e-05	0.00112319	1	-1.40955	-0.123587	strong
chr6	159421183	159421183	1	+	rs56278154	C	A	SNV	c(-2, 8)	SP3	jaspar2018	MA0746.1	MA0746.1	cccgcgataaCacgcccctgg	0.936318	0.833928	7.97727	7.12782	5.8651e-05	0.00101733	1	-0.849455	-0.0998701	strong
chr6	159421183	159421183	1	+	rs56278154	C	A	SNV	c(-2, 9)	SP8	jaspar2018	MA0747.1	MA0747.1	ccccgcgataaCacgcccctggc	0.894578	0.813325	8.68023	7.90576	7.52807e-05	0.000671625	1	-0.774473	-0.0799657	strong
chr1	160725854	160725854	1	-	rs569932	T	C	SNV	c(-2, 7)	FIGLA	jaspar2018	MA0820.1	MA0820.1	aattttaaaCaggtgctca	0.837632	0.992017	7.66116	9.05146	0.00176525	1.43051e-05	1	1.3903	0.152389	strong
chr1	160725854	160725854	1	-	rs569932	T	C	SNV	c(-2, 7)	ID4	jaspar2018	MA0824.1	MA0824.1	aattttaaaCaggtgctca	0.851899	0.993275	9.05519	10.5483	0.00069046	4.3869e-05	1	1.49309	0.140602	strong
chr1	160725854	160725854	1	-	rs569932	T	C	SNV	c(-2, 7)	MSC	jaspar2018	MA0665.1	MA0665.1	aattttaaaCaggtgctca	0.739395	0.857878	9.60252	11.1298	0.00154114	8.7738e-05	1	1.52723	0.117827	strong
chr1	160725854	160725854	1	-	rs569932	T	C	SNV	c(-2, 7)	MYF6	jaspar2018	MA0667.1	MA0667.1	aattttaaaCaggtgctca	0.734385	0.881456	9.71755	11.6507	0.00225258	7.43866e-05	1	1.93318	0.146354	strong
chr1	160725854	160725854	1	+	rs569932	T	C	SNV	c(-6, 8)	SCRT1	jaspar2018	MA0743.1	MA0743.1	gaggaaattttaaaCaggtgctcagtgag	0.72301	0.845882	11.8154	13.8002	0.00164798	8.62535e-05	1	1.98477	0.121842	strong
chr1	160725854	160725854	1	-	rs569932	T	C	SNV	c(-2, 7)	TCF3	jaspar2018	MA0522.2	MA0522.2	aattttaaaCaggtgctca	0.816143	0.995844	8.72068	10.6326	0.0021143	4.57764e-05	1	1.91193	0.179073	strong
chr1	160725854	160725854	1	-	rs569932	T	C	SNV	c(-2, 7)	TCF4	jaspar2018	MA0830.1	MA0830.1	aattttaaaCaggtgctca	0.819845	0.99637	9.13394	11.0939	0.00173187	3.05176e-05	1	1.96	0.176034	strong
chr22	37614738	37614738	1	+	rs6000613	C	A	SNV	c(-10, 4)	EGR2	jaspar2018	MA0472.1	MA0472.1	gtgcctcacccccaCtctgccctgtagcg	0.94054	0.789284	11.0732	9.31408	4.22625e-05	0.0012438	1	-1.75915	-0.149527	strong
chr22	37614738	37614738	1	+	rs6000613	C	A	SNV	c(-10, -1)	KLF16	jaspar2018	MA0741.1	MA0741.1	ctcacccccaCtctgccctgt	0.89941	0.822611	10.2702	9.40349	8.4877e-05	0.000582933	1	-0.866677	-0.0759887	strong
chr22	37614738	37614738	1	+	rs6000613	C	A	SNV	c(-10, 1)	SP8	jaspar2018	MA0747.1	MA0747.1	cctcacccccaCtctgccctgta	0.905116	0.860218	8.78067	8.35272	5.4121e-05	0.000203848	1	-0.427951	-0.0441867	weak
chr20	44650818	44650818	1	-	rs6130997	A	G	SNV	c(-5, 5)	NFKB1	jaspar2018	MA0105.3	MA0105.3	ggtgatggaaAggccggggtc	0.945795	0.783401	11.7099	9.71259	6.03199e-05	0.00199294	1	-1.9973	-0.161378	strong
chr20	44650818	44650818	1	-	rs6130997	A	G	SNV	c(-4, 5)	RELA	jaspar2018	MA0107.1	MA0107.1	gtgatggaaAggccggggt	0.923984	0.824884	10.2188	9.14242	4.57764e-05	0.000552177	1	-1.07635	-0.0974567	strong
chr20	44650818	44650818	1	-	rs6130997	A	G	SNV	c(-1, 12)	Zfx	jaspar2018	MA0146.1	MA0146.1	tctggtgatggaaAggccggggtcaag	0.965544	0.795247	11.08	9.1558	4.34667e-05	0.001801	1	-1.92416	-0.167766	strong
chr20	44650818	44650818	1	-	rs6130997	A	G	SNV	c(-1, 12)	Zfx	jaspar2018	MA0146.2	MA0146.2	tctggtgatggaaAggccggggtcaag	0.965825	0.79546	11.1337	9.19977	4.3679e-05	0.00178665	1	-1.93391	-0.167851	strong
chr20	44761634	44761634	1	+	rs62215620	A	G	SNV	c(-11, 3)	Pou5f1::Sox2	jaspar2018	MA0142.1	MA0142.1	catccttgtcatgaAtacttccttcctta	0.862397	0.795592	10.4047	9.62156	2.37534e-05	0.000195929	1	-0.783178	-0.0651676	strong
chr2	71089229	71089229	1	-	rs67180769	T	G	SNV	c(-12, 2)	CENPB	jaspar2018	MA0637.1	MA0637.1	tatgcgtgtgaatcGggtcctccttaggt	0.759987	0.923947	9.227	11.187	0.00109723	1.23363e-05	1	1.95997	0.162033	strong
chr3	17036875	17036875	1	+	rs6807144	A	T	SNV	c(-3, 8)	FOXI1	jaspar2018	MA0042.1	MA0042.1	agttttgtacaTatttgtatttg	0.78329	0.961649	7.8337	9.57989	0.0033567	3.99947e-05	1	1.74619	0.175402	strong
chr7	50473290	50473290	1	-	rs6956014	T	C	SNV	c(-15, 1)	RARA::RXRA	jaspar2018	MA0159.1	MA0159.1	attccctagttttgagCtgccatgagactccct	0.673274	0.829361	7.54568	9.22262	0.00511261	0.000100162	1	1.67694	0.151678	strong
chr7	50473290	50473290	1	-	rs6956014	T	C	SNV	c(-1, 12)	Rfx1	jaspar2018	MA0509.1	MA0509.1	ccctagttttgagTtgccatgagactc	0.878131	0.742131	11.3375	9.61258	2.05189e-05	0.0010795	1	-1.72494	-0.13389	strong
chr7	50473290	50473290	1	-	rs6956014	T	C	SNV	c(-6, 12)	RFX2	jaspar2018	MA0600.1	MA0600.1	ccattccctagttttgagTtgccatgagactccctca	0.853233	0.716612	11.6396	9.81216	2.01305e-05	0.0011456	1	-1.82746	-0.134344	strong
chr7	50473290	50473290	1	-	rs6956014	T	C	SNV	c(-4, 10)	RFX5	jaspar2018	MA0510.1	MA0510.1	tccctagttttgagTtgccatgagactcc	0.936795	0.783519	10.1911	8.53949	1.66018e-05	0.00164145	1	-1.65164	-0.151914	strong
chr11	118741157	118741157	1	-	rs7117261	T	A	SNV	c(-2, 15)	EWSR1-FLI1	jaspar2018	MA0149.1	MA0149.1	gtccctgggcacttcccTggctgctctctttcccc	0.678102	0.624346	20.9655	19.3116	8.02707e-05	0.000442591	1	-1.6539	-0.0535775	strong
chr11	128174781	128174781	1	+	rs73018933	G	A	SNV	c(-6, 3)	Arntl	jaspar2018	MA0603.1	MA0603.1	gcttctcacGtgcttgtgg	0.983135	0.83279	9.89351	8.40545	3.14713e-05	0.00122166	1	-1.48806	-0.147912	strong
chr11	128174781	128174781	1	+	rs73018933	G	A	SNV	c(-5, 5)	Bhlhe40	jaspar2018	MA0464.1	MA0464.1	agcttctcacGtgcttgtgga	0.99485	0.947089	11.498	10.9486	2.86102e-06	6.41346e-05	1	-0.549365	-0.0475342	weak
chr11	128174781	128174781	1	+	rs73018933	G	A	SNV	c(-5, 4)	BHLHE40	jaspar2018	MA0464.2	MA0464.2	gcttctcacGtgcttgtgg	0.990328	0.828065	11.647	9.75346	2.86102e-05	0.00117493	1	-1.89358	-0.16102	strong
chr11	128174781	128174781	1	-	rs73018933	G	A	SNV	c(-5, 4)	BHLHE41	jaspar2018	MA0636.1	MA0636.1	gcttctcacGtgcttgtgg	0.92477	0.787319	13.3378	11.3585	3.14713e-05	0.000862122	1	-1.97928	-0.137249	strong
chr11	128174781	128174781	1	-	rs73018933	G	A	SNV	c(-4, 3)	Id2	jaspar2018	MA0617.1	MA0617.1	ttctcacGtgcttgt	1	0.837351	12.2591	10.2711	0	0.000244141	1	-1.98798	-0.162164	strong
chr11	128174781	128174781	1	-	rs73018933	G	A	SNV	c(-4, 5)	MAX	jaspar2018	MA0058.1	MA0058.1	gcttctcacGtgcttgtgg	0.993155	0.826136	9.57204	7.99256	3.8147e-05	0.00145912	1	-1.57948	-0.163901	strong
chr11	128174781	128174781	1	-	rs73018933	G	A	SNV	c(-5, 4)	MAX	jaspar2018	MA0058.3	MA0058.3	gcttctcacGtgcttgtgg	0.994163	0.851572	10.7901	9.25277	5.81741e-05	0.000430107	1	-1.53735	-0.141652	strong
chr11	128174781	128174781	1	-	rs73018933	G	A	SNV	c(-5, 5)	MAX::MYC	jaspar2018	MA0059.1	MA0059.1	agcttctcacGtgcttgtgga	0.887558	0.765162	9.69565	8.39325	8.89301e-05	0.00154018	1	-1.3024	-0.119573	strong
chr11	128174781	128174781	1	+	rs73018933	G	A	SNV	c(-5, 4)	MLX	jaspar2018	MA0663.1	MA0663.1	gcttctcacGtgcttgtgg	0.922134	0.778266	12.4831	10.5482	3.43323e-05	0.00106812	1	-1.93489	-0.143003	strong
chr11	128174781	128174781	1	-	rs73018933	G	A	SNV	c(-4, 3)	Mlxip	jaspar2018	MA0622.1	MA0622.1	ttctcacGtgcttgt	0.992469	0.828752	12.0854	10.0974	7.62939e-05	0.00161743	1	-1.98797	-0.163258	strong
chr11	128174781	128174781	1	+	rs73018933	G	A	SNV	c(-5, 4)	MLXIPL	jaspar2018	MA0664.1	MA0664.1	gcttctcacGtgcttgtgg	0.978301	0.834139	11.5526	9.86443	2.86102e-05	0.000431061	1	-1.6882	-0.142986	strong
chr11	128174781	128174781	1	-	rs73018933	G	A	SNV	c(-3, 4)	Mycn	jaspar2018	MA0104.3	MA0104.3	ttctcacGtgcttgt	0.934958	0.819586	11.5847	10.1585	7.62939e-05	0.00161743	1	-1.42616	-0.115118	strong
chr11	128174781	128174781	1	-	rs73018933	G	A	SNV	c(-5, 4)	Srebf1(var.2)	jaspar2018	MA0829.1	MA0829.1	gcttctcacGtgcttgtgg	0.892845	0.772667	12.1428	10.5133	4.48227e-05	0.000972748	1	-1.62951	-0.119855	strong
chr11	128174781	128174781	1	-	rs73018933	G	A	SNV	c(-5, 4)	SREBF2(var.2)	jaspar2018	MA0828.1	MA0828.1	gcttctcacGtgcttgtgg	0.887284	0.762061	12.5739	10.8021	4.29153e-05	0.000998497	1	-1.77178	-0.125049	strong
chr11	128174781	128174781	1	-	rs73018933	G	A	SNV	c(-4, 11)	T	jaspar2018	MA0009.2	MA0009.2	agcagagcttctcacAtgcttgtggaaaata	0.752527	0.793125	12.6978	13.3719	0.000315822	0.000100185	1	0.674104	0.0401086	weak
chr11	128174781	128174781	1	-	rs73018933	G	A	SNV	c(-6, 13)	TBX19	jaspar2018	MA0804.1	MA0804.1	gcttagcagagcttctcacAtgcttgtggaaaataaaat	0.77024	0.828617	11.4548	12.2945	0.000309215	6.1673e-05	1	0.839698	0.0568913	strong
chr11	128174781	128174781	1	-	rs73018933	G	A	SNV	c(-5, 4)	TFE3	jaspar2018	MA0831.1	MA0831.1	gcttctcacGtgcttgtgg	0.981397	0.869545	7.99452	7.1028	3.33786e-05	0.00144196	1	-0.891719	-0.10951	strong
chr11	128174781	128174781	1	-	rs73018933	G	A	SNV	c(-5, 2)	TFE3	jaspar2018	MA0831.2	MA0831.2	ttctcacGtgcttgt	0.96079	0.871863	9.4039	8.54124	4.57764e-05	0.000686646	1	-0.862659	-0.0881679	strong
chr11	128174781	128174781	1	-	rs73018933	G	A	SNV	c(-5, 4)	TFEB	jaspar2018	MA0692.1	MA0692.1	gcttctcacGtgcttgtgg	0.956145	0.876902	9.45154	8.67944	4.1008e-05	0.000460625	1	-0.772101	-0.0781571	strong
chr11	128174781	128174781	1	-	rs73018933	G	A	SNV	c(-5, 4)	TFEC	jaspar2018	MA0871.1	MA0871.1	gcttctcacGtgcttgtgg	0.986872	0.917428	8.52782	7.93548	1.04904e-05	0.000288963	1	-0.592341	-0.0685596	weak
chr11	128174781	128174781	1	+	rs73018933	G	A	SNV	c(-9, 6)	USF2	jaspar2018	MA0526.2	MA0526.2	agcagagcttctcacGtgcttgtggaaaata	0.902276	0.798943	11.8102	10.4766	6.88536e-05	0.000634148	1	-1.33365	-0.102027	strong
chr11	60793701	60793701	1	-	rs58171230	C	T	SNV	c(-13, 5)	CTCF	jaspar2018	MA0139.1	MA0139.1	gcccgtgtggccacctggTgtggacctctcttggccg	0.815069	0.850312	11.2618	11.7374	0.000139112	4.31654e-05	1	0.475559	0.034568	weak
chr11	60793701	60793701	1	+	rs58171230	C	T	SNV	c(-10, 3)	ZIC1	jaspar2018	MA0696.1	MA0696.1	tgtggccacctggTgtggacctctctt	0.803311	0.842049	13.4203	14.0623	8.90419e-05	2.582e-05	1	0.642006	0.0384895	weak
chr10	112174424	112174424	1	+	rs74589852	A	G	SNV	c(-1, 6)	Smad4	jaspar2018	MA1153.1	MA1153.1	ttcctccGtctagaa	0.803636	0.986561	8.80088	10.7888	0.00189209	6.10352e-05	1	1.98797	0.1818	strong
chr2	25195577	25195577	1	-	rs76286777	T	C	SNV	c(-1, 8)	HINFP	jaspar2018	MA0131.1	MA0131.1	ctggagctgCggacgtcag	0.816435	0.953358	8.21255	9.56105	0.000713348	2.28882e-05	1	1.3485	0.134575	strong
chr2	25195577	25195577	1	-	rs76286777	T	C	SNV	c(-3, 8)	HINFP	jaspar2018	MA0131.2	MA0131.2	ggctggagctgCggacgtcagtt	0.861805	0.973479	10.0108	11.2955	0.000343382	1.66893e-05	1	1.28463	0.110739	strong
chr2	25195577	25195577	1	+	rs76286777	T	C	SNV	c(1, 18)	Nr1h3::Rxra	jaspar2018	MA0494.1	MA0494.1	taagccaggctggagctgTggacgtcagtttcctcag	0.835375	0.695639	8.79717	7.35569	7.4218e-05	0.00319402	1	-1.44148	-0.137344	strong
chr4	103552068	103552068	1	-	rs7690700	T	C	SNV	c(-12, 5)	PPARA::RXRA	jaspar2018	MA1148.1	MA1148.1	acaaagtaaactctggcCcatcagcttgaaagccc	0.71873	0.817661	6.81297	7.69922	0.00139347	9.62033e-05	1	0.886251	0.0949624	strong
chr4	103552068	103552068	1	-	rs7690700	T	C	SNV	c(-11, 3)	Pparg::Rxra	jaspar2018	MA0065.2	MA0065.2	aagtaaactctggcCcatcagcttgaaag	0.772162	0.849251	6.89599	7.5539	0.000859586	9.29907e-05	1	0.657906	0.07442	weak
chr5	172244155	172244155	1	-	rs793007	G	A	SNV	c(-10, 4)	EGR2	jaspar2018	MA0472.1	MA0472.1	ggggcggtgtgggaGcatccaatgaaatg	0.939649	0.807054	11.0629	9.52075	4.33968e-05	0.00091719	1	-1.54213	-0.13108	strong
chr10	112114255	112114255	1	-	rs80349868	G	A	SNV	c(-9, 8)	E2F3	jaspar2018	MA0469.2	MA0469.2	agcggacaggagagggcGctgtttcagagcttctt	0.800508	0.693006	15.0104	13.0134	2.94035e-05	0.000820716	1	-1.99694	-0.106696	strong
chr6	32632957	32632957	1	+	rs9274418	C	A	SNV	c(-10, 3)	E2F7	jaspar2018	MA0758.1	MA0758.1	tccagttcccgccAgcccgtgcctggc	0.671174	0.754198	15.6524	17.583	0.000902839	9.43877e-05	1	1.9306	0.0828626	strong
chr6	32632957	32632957	1	+	rs9274418	C	A	SNV	c(-8, 5)	EGR1	jaspar2018	MA0162.2	MA0162.2	tccagttcccgccCgcccgtgcctggc	0.897109	0.812736	10.5791	9.59387	5.27911e-05	0.00059728	1	-0.985228	-0.0836317	strong
chr6	32632957	32632957	1	+	rs9274418	C	A	SNV	c(-7, 8)	EGR4	jaspar2018	MA0733.1	MA0733.1	cctccagttcccgccCgcccgtgcctggcgc	0.858993	0.720964	10.0886	8.52131	6.68112e-05	0.00198822	1	-1.56732	-0.134076	strong
chr6	32632957	32632957	1	+	rs9274418	C	A	SNV	c(-8, 6)	SP2	jaspar2018	MA0516.1	MA0516.1	ctccagttcccgccCgcccgtgcctggcg	0.917507	0.856089	10.6437	9.94193	4.42164e-05	0.000377822	1	-0.701803	-0.0605714	strong
chr17	37976469	37976469	1	+	rs9303277	C	T	SNV	c(-10, 4)	MEF2C	jaspar2018	MA0497.1	MA0497.1	gcgatgaattaaaaTagggctgtgttaaa	0.782807	0.912416	9.25836	10.767	0.00116386	4.29982e-05	1	1.50868	0.128	strong
chr2	198907143	198907143	1	+	rs9712275	C	T	SNV	c(-4, 7)	EHF	jaspar2018	MA0598.2	MA0598.2	accagctgaacCggaaggtgatg	0.871362	0.781491	11.6561	10.4739	6.9797e-05	0.000650287	1	-1.18222	-0.0885675	strong
chr2	198907143	198907143	1	+	rs9712275	C	T	SNV	c(-4, 7)	ELF1	jaspar2018	MA0473.2	MA0473.2	accagctgaacCggaaggtgatg	0.861405	0.744995	12.9528	11.22	6.9797e-05	0.0010857	1	-1.73279	-0.115398	strong
chr2	198907143	198907143	1	+	rs9712275	C	T	SNV	c(-4, 8)	ELF3	jaspar2018	MA0640.1	MA0640.1	caccagctgaacCggaaggtgatga	0.828815	0.738518	13.2304	11.8008	0.000101015	0.000887454	1	-1.42964	-0.0896845	strong
chr2	198907143	198907143	1	+	rs9712275	C	T	SNV	c(-4, 7)	ELF4	jaspar2018	MA0641.1	MA0641.1	accagctgaacCggaaggtgatg	0.867203	0.761928	12.9803	11.4212	4.82202e-05	0.000709593	1	-1.55919	-0.104313	strong
chr2	198907143	198907143	1	+	rs9712275	C	T	SNV	c(-2, 7)	ELK1	jaspar2018	MA0028.2	MA0028.2	cagctgaacCggaaggtga	0.923476	0.781752	12.4325	10.5371	2.28882e-05	0.000887871	1	-1.89548	-0.140865	strong
chr2	198907143	198907143	1	+	rs9712275	C	T	SNV	c(-2, 7)	ELK3	jaspar2018	MA0759.1	MA0759.1	cagctgaacCggaaggtga	0.946631	0.800357	9.99748	8.47379	2.76566e-05	0.00157547	1	-1.52369	-0.144379	strong
chr2	198907143	198907143	1	-	rs9712275	C	T	SNV	c(-2, 8)	ELK4	jaspar2018	MA0076.2	MA0076.2	ccagctgaacCggaaggtgat	0.960126	0.859073	11.3177	10.1362	4.07696e-05	0.000573397	1	-1.18148	-0.100262	strong
chr2	198907143	198907143	1	+	rs9712275	C	T	SNV	c(-2, 6)	ELK4	jaspar2018	MA0076.1	MA0076.1	agctgaacCggaaggtg	0.957267	0.804778	10.4774	8.83826	1.14441e-05	0.000865936	1	-1.63915	-0.149875	strong
chr2	198907143	198907143	1	+	rs9712275	C	T	SNV	c(-2, 7)	ERF	jaspar2018	MA0760.1	MA0760.1	cagctgaacCggaaggtga	0.918447	0.815139	10.3398	9.18732	3.62396e-05	0.000567436	1	-1.15251	-0.102449	strong
chr2	198907143	198907143	1	+	rs9712275	C	T	SNV	c(-2, 7)	ERG	jaspar2018	MA0474.2	MA0474.2	cagctgaacCggaaggtga	0.949494	0.828121	9.72839	8.49487	4.48227e-05	0.00137234	1	-1.23352	-0.120441	strong
chr2	198907143	198907143	1	+	rs9712275	C	T	SNV	c(-2, 7)	ETS1	jaspar2018	MA0098.3	MA0098.3	cagctgaacCggaaggtga	0.94931	0.833512	9.98988	8.7835	2.95639e-05	0.000955582	1	-1.20638	-0.114697	strong
chr2	198907143	198907143	1	+	rs9712275	C	T	SNV	c(-2, 7)	ETV1	jaspar2018	MA0761.1	MA0761.1	cagctgaacCggaaggtga	0.96698	0.8169	9.05693	7.67245	2.38419e-05	0.00266266	1	-1.38448	-0.14789	strong
chr2	198907143	198907143	1	+	rs9712275	C	T	SNV	c(-3, 7)	ETV2	jaspar2018	MA0762.1	MA0762.1	ccagctgaacCggaaggtgat	0.91435	0.808262	12.1352	10.7358	3.21865e-05	0.000554085	1	-1.39941	-0.105496	strong
chr2	198907143	198907143	1	+	rs9712275	C	T	SNV	c(-2, 7)	ETV4	jaspar2018	MA0764.1	MA0764.1	cagctgaacCggaaggtga	0.968283	0.822394	8.94813	7.61816	2.57492e-05	0.00310612	1	-1.32997	-0.143979	strong
chr2	198907143	198907143	1	+	rs9712275	C	T	SNV	c(-2, 7)	ETV5	jaspar2018	MA0765.1	MA0765.1	cagctgaacCggaaggtga	0.979461	0.817182	8.06613	6.75245	4.00543e-05	0.00416374	1	-1.31368	-0.159574	strong
chr2	198907143	198907143	1	+	rs9712275	C	T	SNV	c(-2, 7)	FEV	jaspar2018	MA0156.2	MA0156.2	cagctgaacCggaaggtga	0.950965	0.812926	9.84917	8.43449	2.47955e-05	0.00171947	1	-1.41468	-0.136662	strong
chr2	198907143	198907143	1	+	rs9712275	C	T	SNV	c(-2, 7)	FLI1	jaspar2018	MA0475.2	MA0475.2	cagctgaacCggaaggtga	0.950817	0.820123	11.3344	9.7864	2.67029e-05	0.000788689	1	-1.548	-0.129899	strong
chr2	198907143	198907143	1	+	rs9712275	C	T	SNV	c(-1, 9)	Gabpa	jaspar2018	MA0062.2	MA0062.2	ccagctgaacCggaaggtgat	0.94783	0.827179	11.5199	10.0653	4.43459e-05	0.000703335	1	-1.45454	-0.119727	strong
chr2	198907143	198907143	1	+	rs9712275	C	T	SNV	c(-2, 7)	GABPA	jaspar2018	MA0062.1	MA0062.1	cagctgaacCggaaggtga	0.975922	0.881647	8.01279	7.26968	9.53674e-06	0.000275612	1	-0.74311	-0.0905947	strong
chr2	198907143	198907143	1	+	rs9712275	C	T	SNV	c(-3, 9)	ZBTB7A	jaspar2018	MA0750.2	MA0750.2	caccagctgaacCggaaggtgatga	0.952089	0.876164	9.58953	8.84417	4.8995e-05	0.000274971	1	-0.745363	-0.0740926	strong
chr10	6094697	6094697	1	+	rs61839660	C	T	SNV	c(-6, 5)	FOXI1	jaspar2018	MA0042.1	MA0042.1	gaaggaggtatTtattttggtcc	0.848775	0.974121	8.47482	9.702	0.00121588	1.88947e-05	1	1.22717	0.123268	strong
chr10	6094697	6094697	1	-	rs61839660	C	T	SNV	c(-2, 12)	MEF2C	jaspar2018	MA0497.1	MA0497.1	tctgaaggaggtatCtattttggtcccaa	0.92161	0.874626	10.8741	10.3272	2.75075e-05	0.000145075	1	-0.546902	-0.0464006	weak
chr17	73308346	73308346	1	-	rs9909443	C	T	SNV	c(1, 11)	PKNOX1	jaspar2018	MA0782.1	MA0782.1	tgctggtcttaTgaaagctgtca	0.830589	0.909985	17.2364	18.8822	1.8537e-05	2.08616e-06	1	1.64578	0.0793221	strong
chr17	73308346	73308346	1	+	rs9909443	C	T	SNV	c(1, 11)	PKNOX2	jaspar2018	MA0783.1	MA0783.1	tgctggtcttaTgaaagctgtca	0.807012	0.889008	16.4989	18.1731	6.13928e-05	4.23193e-06	1	1.67417	0.0819092	strong
chr17	73308346	73308346	1	-	rs9909443	C	T	SNV	c(1, 11)	TGIF1	jaspar2018	MA0796.1	MA0796.1	tgctggtcttaTgaaagctgtca	0.823506	0.910002	17.9844	19.8721	1.66297e-05	1.66893e-06	1	1.88769	0.0864477	strong
chr17	73308346	73308346	1	+	rs9909443	C	T	SNV	c(1, 11)	TGIF2	jaspar2018	MA0797.1	MA0797.1	tgctggtcttaTgaaagctgtca	0.822697	0.899403	14.1114	15.4154	4.37498e-05	3.69549e-06	1	1.30396	0.0761415	strong
chr5	35908474	35908474	1	+	rs1010599	A	G	SNV	c(-8, 3)	Mafb	jaspar2018	MA0117.2	MA0117.2	ctataactgctGaaaacctcaat	0.804113	0.938371	7.88479	9.17124	0.00165868	8.20756e-05	1	1.28645	0.131785	strong
chr5	35908474	35908474	1	-	rs1010599	A	G	SNV	c(-8, 6)	MAFK	jaspar2018	MA0496.1	MA0496.1	gtgctataactgctGaaaacctcaataac	0.810701	0.949839	9.84875	11.5122	0.00134222	6.7398e-05	1	1.66349	0.137343	strong
chr5	35908474	35908474	1	+	rs1010599	A	G	SNV	c(-8, 2)	NRL	jaspar2018	MA0842.1	MA0842.1	tataactgctGaaaacctcaa	0.859859	0.962672	5.85045	6.53111	0.00145912	0.000130415	1	0.680656	0.100418	weak
chr19	49148781	49148781	1	+	rs10426317	C	T	SNV	c(-4, 9)	EGR1	jaspar2018	MA0162.2	MA0162.2	gcatccccacctcCaccctccctcggg	0.892744	0.840145	10.5281	9.91393	6.24619e-05	0.000290848	1	-0.614197	-0.0521365	weak
chr19	49148781	49148781	1	-	rs10426317	C	T	SNV	c(-8, 9)	PPARA::RXRA	jaspar2018	MA1148.1	MA1148.1	cttggcatccccacctcTaccctccctcgggggct	0.72576	0.847834	6.87595	7.96952	0.00118294	3.62851e-05	1	1.09357	0.117177	strong
chr1	160402539	160402539	1	-	rs10494343	T	C	SNV	c(-5, 5)	BATF::JUN	jaspar2018	MA0462.1	MA0462.1	tcagtttactCatatcttaac	0.778248	0.931514	9.50881	11.3744	0.00207472	7.53403e-05	1	1.86559	0.152817	strong
chr3	101215356	101215356	1	-	rs10936664	T	C	SNV	c(-4, 9)	PLAG1	jaspar2018	MA0163.1	MA0163.1	agcaatcctcccaCcttggcctcccta	0.777876	0.81785	11.0201	11.5743	0.000181314	5.42402e-05	1	0.554218	0.0393068	weak
chr3	101215356	101215356	1	-	rs10936664	T	C	SNV	c(-5, 2)	TBX15	jaspar2018	MA0803.1	MA0803.1	cctcccaCcttggcc	0.738655	0.894597	9.36938	11.333	0.00276184	7.62939e-05	1	1.96362	0.155101	strong
chr3	101215356	101215356	1	-	rs10936664	T	C	SNV	c(-7, 4)	YY1	jaspar2018	MA0095.2	MA0095.2	caatcctcccaTcttggcctccc	0.913409	0.75969	12.0461	10.0481	8.30293e-05	0.00234032	1	-1.99802	-0.151691	strong
chr12	68431375	68431375	1	-	rs114026003	G	T	SNV	c(-1, 7)	Nr2e1	jaspar2018	MA0676.1	MA0676.1	ctaaatctTgacttctc	0.790376	0.986977	8.13049	10.1242	0.00275803	3.8147e-06	1	1.99367	0.194387	strong
chr2	204742934	204742934	1	+	rs11571302	G	T	SNV	c(-5, 7)	ELF3	jaspar2018	MA0640.1	MA0640.1	gtcagcaaagccGgcagtacactga	0.830314	0.705471	13.2542	11.2776	9.76324e-05	0.00187956	1	-1.97661	-0.123997	strong
chr9	123655329	123655329	1	+	rs6478486	T	C	SNV	c(-1, 12)	CREB3L1	jaspar2018	MA0839.1	MA0839.1	gggacaatctcagTgccaccttatcag	0.836976	0.804166	13.1491	12.6422	6.12922e-05	0.000150591	1	-0.50697	-0.0323568	weak
chr9	123655329	123655329	1	+	rs6478486	T	C	SNV	c(-9, 1)	Gfi1b	jaspar2018	MA0483.1	MA0483.1	acaatctcagCgccaccttat	0.912242	0.95805	10.5646	11.0908	6.46114e-05	6.67572e-06	1	0.526164	0.0454662	weak
chr9	123655329	123655329	1	+	rs6478486	T	C	SNV	c(-1, 7)	Hic1	jaspar2018	MA0739.1	MA0739.1	aatctcagTgccacctt	0.97045	0.782162	8.03998	6.51051	9.53674e-05	0.00607681	1	-1.52947	-0.184719	strong
chr9	123655329	123655329	1	+	rs6478486	T	C	SNV	c(-11, 3)	Sox1	jaspar2018	MA0870.1	MA0870.1	ggggacaatctcagTgccaccttatcaga	0.844018	0.745168	16.5328	14.6132	1.45892e-05	0.000283487	1	-1.91956	-0.0981281	strong
chr16	23847062	23847062	1	-	rs11645239	C	G	SNV	c(-9, 4)	EGR1	jaspar2018	MA0162.2	MA0162.2	cagccccgggggcGgaggacggggtgg	0.793359	0.925819	9.36761	10.9143	0.000947893	1.99191e-05	1	1.54673	0.131295	strong
chr16	23847062	23847062	1	-	rs11645239	C	G	SNV	c(-6, 4)	SP1	jaspar2018	MA0079.3	MA0079.3	ccccgggggcGgaggacgggg	0.776334	0.940275	9.07077	10.9745	0.00252032	2.38419e-05	1	1.90368	0.163154	strong
chr16	23847062	23847062	1	-	rs11645239	C	G	SNV	c(-10, 4)	SP2	jaspar2018	MA0516.1	MA0516.1	gcagccccgggggcGgaggacggggtggg	0.76243	0.901489	8.87171	10.4607	0.00264639	9.13329e-05	1	1.58899	0.137143	strong
chr16	23847062	23847062	1	+	rs11645239	C	G	SNV	c(-3, 17)	ZNF263	jaspar2018	MA0528.1	MA0528.1	ctgaacgcagccccgggggcGgaggacggggtggggtgggg	0.788135	0.862924	8.96062	9.77835	3.58162e-05	8.38367e-07	1	0.817731	0.0725124	strong
chr11	65625464	65625464	1	+	rs117231452	G	A	SNV	c(1, 13)	PLAG1	jaspar2018	MA0163.1	MA0163.1	cctcatcccgcccGgggcgctggggga	0.836031	0.728948	11.8264	10.3418	2.93888e-05	0.000668496	1	-1.48466	-0.105297	strong
chr11	65625464	65625464	1	+	rs117231452	G	A	SNV	c(-8, 6)	ZIC3	jaspar2018	MA0697.1	MA0697.1	ccctcatcccgcccGgggcgctgggggag	0.825692	0.753171	12.2845	11.2203	7.25817e-05	0.000536873	1	-1.06422	-0.0717013	strong
chr11	65625464	65625464	1	+	rs117231452	G	A	SNV	c(-8, 6)	ZIC4	jaspar2018	MA0751.1	MA0751.1	ccctcatcccgcccGgggcgctgggggag	0.881189	0.816844	9.83156	9.12979	4.08944e-05	0.000316427	1	-0.701763	-0.0630666	strong
chr12	6449574	6449574	1	+	rs117775665	G	A	SNV	c(-5, 6)	INSM1	jaspar2018	MA0155.1	MA0155.1	tgagggagccaGgggccgccccc	0.884745	0.725776	9.52391	7.83617	8.73208e-05	0.00389594	1	-1.68774	-0.157035	strong
chr12	6449574	6449574	1	+	rs117775665	G	A	SNV	c(-1, 11)	NFKB1	jaspar2018	MA0105.4	MA0105.4	gtgagggagccaGgggccgccccca	0.812568	0.720939	15.6365	13.8836	5.45532e-05	0.000627682	1	-1.75289	-0.0911911	strong
chr12	6449574	6449574	1	-	rs117775665	G	A	SNV	c(1, 10)	NFKB1	jaspar2018	MA0105.2	MA0105.2	gagggagccaGgggccgcccc	0.918152	0.870261	10.5665	10.0272	2.16961e-05	0.000100374	1	-0.539349	-0.0469477	weak
chr12	6449574	6449574	1	-	rs117775665	G	A	SNV	c(-1, 11)	NFKB2	jaspar2018	MA0778.1	MA0778.1	gtgagggagccaGgggccgccccca	0.888498	0.831265	13.2629	12.4188	3.66122e-05	0.000167042	1	-0.844093	-0.0566226	strong
chr19	1082266	1082266	1	-	rs11878920	G	C	SNV	c(-14, 3)	ESR2	jaspar2018	MA0258.1	MA0258.1	gcagaggcacacctgacCctgtgcgggggcggggc	0.781105	0.854447	8.44023	9.2101	0.000611844	6.51647e-05	1	0.769872	0.0716963	strong
chr19	1082266	1082266	1	-	rs11878920	G	C	SNV	c(-8, 4)	NR2F1	jaspar2018	MA0017.2	MA0017.2	ggcacacctgacCctgtgcgggggc	0.7747	0.940047	9.37696	11.3418	0.00233364	9.27746e-05	1	1.96487	0.163002	strong
chr3	196368501	196368501	1	+	rs12152276	A	G	SNV	c(-2, 12)	IRF4	jaspar2018	MA1419.1	MA1419.1	acctggtagactccGaaacagagagcaga	0.702834	0.788598	15.4604	17.3385	0.000502989	4.59375e-05	1	1.87805	0.0854912	strong
chr3	196368501	196368501	1	+	rs12152276	A	G	SNV	c(-2, 11)	IRF5	jaspar2018	MA1420.1	MA1420.1	cctggtagactccGaaacagagagcag	0.734612	0.8304	9.53634	10.7443	0.000831842	5.64009e-05	1	1.20798	0.0937647	strong
chr3	196368501	196368501	1	+	rs12152276	A	G	SNV	c(-2, 11)	IRF8	jaspar2018	MA0652.1	MA0652.1	cctggtagactccGaaacagagagcag	0.695276	0.78838	14.8457	16.8308	0.000726119	5.48214e-05	1	1.98506	0.0930088	strong
chr20	44651787	44651787	1	-	rs12479993	C	T	SNV	c(-3, 7)	SOX13	jaspar2018	MA1120.1	MA1120.1	cggacctcctCattgtacaga	0.980612	0.884261	9.14138	8.2583	0.000109434	0.000475645	1	-0.883078	-0.0947603	strong
chr2	242480415	242480415	1	-	rs6735876	C	T	SNV	c(-2, 7)	FIGLA	jaspar2018	MA0820.1	MA0820.1	gggaaaggaCaggtgtccc	0.984973	0.830588	8.98803	7.59773	6.86646e-05	0.00193214	1	-1.3903	-0.152389	strong
chr2	242480415	242480415	1	-	rs6735876	C	T	SNV	c(-2, 7)	ID4	jaspar2018	MA0824.1	MA0824.1	gggaaaggaCaggtgtccc	0.999575	0.858198	10.6148	9.12172	9.53674e-07	0.000369072	1	-1.49309	-0.140602	strong
chr2	242480415	242480415	1	-	rs6735876	C	T	SNV	c(-2, 7)	MYF6	jaspar2018	MA0667.1	MA0667.1	gggaaaggaCaggtgtccc	0.87583	0.728759	11.5768	9.6436	9.05991e-05	0.00253773	1	-1.93318	-0.146354	strong
chr2	242480415	242480415	1	+	rs6735876	C	T	SNV	c(-3, 8)	PKNOX1	jaspar2018	MA0782.1	MA0782.1	aagggaaaggaCaggtgtccctg	0.833965	0.738272	17.3064	15.3228	1.35303e-05	0.00029552	1	-1.9836	-0.0956037	strong
chr2	242480415	242480415	1	+	rs6735876	C	T	SNV	c(-3, 8)	PKNOX2	jaspar2018	MA0783.1	MA0783.1	aagggaaaggaCaggtgtccctg	0.832908	0.739671	17.0276	15.1239	1.63317e-05	0.000259638	1	-1.9037	-0.0931394	strong
chr2	242480415	242480415	1	-	rs6735876	C	T	SNV	c(-2, 7)	TCF3	jaspar2018	MA0522.2	MA0522.2	gggaaaggaCaggtgtccc	0.996388	0.816687	10.6384	8.72647	4.1008e-05	0.0020752	1	-1.91193	-0.179073	strong
chr2	242480415	242480415	1	-	rs6735876	C	T	SNV	c(-2, 7)	TCF4	jaspar2018	MA0830.1	MA0830.1	gggaaaggaCaggtgtccc	0.990918	0.814393	11.0334	9.07341	9.05991e-05	0.00252819	1	-1.96	-0.176034	strong
chr2	242480415	242480415	1	+	rs6735876	C	T	SNV	c(-3, 8)	TGIF1	jaspar2018	MA0796.1	MA0796.1	aagggaaaggaCaggtgtccctg	0.79444	0.703541	17.3501	15.3663	5.57899e-05	0.000667274	1	-1.98378	-0.0908483	strong
chr2	242480415	242480415	1	+	rs6735876	C	T	SNV	c(-3, 8)	TGIF2	jaspar2018	MA0797.1	MA0797.1	aagggaaaggaCaggtgtccctg	0.833442	0.733095	14.2941	12.5882	3.27229e-05	0.000517547	1	-1.70584	-0.0996086	strong
chr5	35797165	35797165	1	+	rs143965891	C	A	SNV	c(-7, 4)	EHF	jaspar2018	MA0598.2	MA0598.2	gaagcaactggAagtttgaatat	0.726392	0.87082	9.74906	11.6489	0.00216466	7.07507e-05	1	1.89989	0.142333	strong
chr5	35797165	35797165	1	+	rs143965891	C	A	SNV	c(-7, 5)	ELF3	jaspar2018	MA0640.1	MA0640.1	ggaagcaactggAagtttgaatatt	0.712768	0.837242	11.3931	13.3639	0.00160187	8.13454e-05	1	1.97077	0.123631	strong
chr5	35797165	35797165	1	+	rs143965891	C	A	SNV	c(-7, 4)	ELF4	jaspar2018	MA0641.1	MA0641.1	gaagcaactggAagtttgaatat	0.720328	0.850541	10.805	12.7336	0.00196391	9.06587e-05	1	1.92854	0.129024	strong
chr5	35797165	35797165	1	+	rs143965891	C	A	SNV	c(-6, 4)	ELF5	jaspar2018	MA0136.2	MA0136.2	aagcaactggAagtttgaata	0.737062	0.953801	6.67091	8.59119	0.00925827	8.86917e-05	1	1.92028	0.213353	strong
chr5	35797165	35797165	1	+	rs143965891	C	A	SNV	c(-5, 4)	ERF	jaspar2018	MA0760.1	MA0760.1	agcaactggAagtttgaat	0.746313	0.889996	8.41949	10.0224	0.00238132	7.9155e-05	1	1.60294	0.142488	strong
chr5	35797165	35797165	1	-	rs143965891	C	A	SNV	c(-12, 2)	HSF1	jaspar2018	MA0486.1	MA0486.1	ttggaagcaactggAagtttgaatattat	0.747307	0.841953	9.66911	10.8637	0.00108708	9.19839e-05	1	1.19463	0.0929047	strong
chr5	35797165	35797165	1	-	rs143965891	C	A	SNV	c(-3, 6)	Myb	jaspar2018	MA0100.2	MA0100.2	agcaactggCagtttgaat	0.991071	0.842096	12.0073	10.2058	1.23978e-05	0.000662804	1	-1.80145	-0.148693	strong
chr5	35797165	35797165	1	+	rs143965891	C	A	SNV	c(-9, 4)	SPIC	jaspar2018	MA0687.1	MA0687.1	tggaagcaactggAagtttgaatatta	0.753521	0.870968	8.13059	9.3633	0.00128538	5.43669e-05	1	1.23271	0.115017	strong
chr16	30953202	30953202	1	+	rs1458202	G	A	SNV	c(-11, 2)	FOXF2	jaspar2018	MA0030.1	MA0030.1	ttcaatcataaacAaggcttctgaggc	0.803564	0.953617	9.46204	11.1863	0.00111613	3.75658e-05	1	1.72423	0.147128	strong
chr16	30953202	30953202	1	+	rs1458202	G	A	SNV	c(-6, 1)	FOXG1	jaspar2018	MA0613.1	MA0613.1	cataaacAaggcttc	0.824963	0.979815	10.3986	12.3473	0.00106812	4.57764e-05	1	1.94869	0.154642	strong
chr16	30953202	30953202	1	+	rs1458202	G	A	SNV	c(-6, 1)	Foxj2	jaspar2018	MA0614.1	MA0614.1	cataaacAaggcttc	0.804431	0.992721	8.54411	10.5321	0.00234985	1.52588e-05	1	1.98797	0.187386	strong
chr16	30953202	30953202	1	+	rs1458202	G	A	SNV	c(-11, 5)	Foxj3	jaspar2018	MA0851.1	MA0851.1	gccttcaatcataaacAaggcttctgaggctca	0.769824	0.935374	8.6708	10.4888	0.0018987	2.81453e-05	1	1.81796	0.162341	strong
chr16	30953202	30953202	1	+	rs1458202	G	A	SNV	c(-11, 5)	Foxk1	jaspar2018	MA0852.1	MA0852.1	gccttcaatcataaacAaggcttctgaggctca	0.739094	0.888731	9.65547	11.5622	0.00175672	4.15691e-05	1	1.90678	0.1469	strong
chr16	30953202	30953202	1	+	rs1458202	G	A	SNV	c(-9, 4)	FOXK1	jaspar2018	MA0852.2	MA0852.2	ttcaatcataaacAaggcttctgaggc	0.758583	0.918543	7.83549	9.44658	0.00253006	6.40415e-05	1	1.61109	0.156919	strong
chr16	30953202	30953202	1	+	rs1458202	G	A	SNV	c(-8, 2)	FOXK2	jaspar2018	MA1103.1	MA1103.1	aatcataaacAaggcttctga	0.788914	0.961563	7.58055	9.20481	0.00269747	9.46522e-05	1	1.62426	0.169787	strong
chr10	75716487	75716487	1	-	rs147975083	T	C	SNV	c(-4, 8)	JUN	jaspar2018	MA0488.1	MA0488.1	agctatccattaCctcactgtggtt	0.767047	0.897684	10.3747	12.1323	0.00142716	6.2868e-05	1	1.75762	0.130108	strong
chr10	75716487	75716487	1	-	rs147975083	T	C	SNV	c(-5, 9)	JUND(var.2)	jaspar2018	MA0492.1	MA0492.1	atagctatccattaCctcactgtggtttc	0.847489	0.901336	11.1039	11.8047	0.000280001	5.46081e-05	1	0.700853	0.0535456	strong
chr10	112272112	112272112	1	-	rs149648716	G	T	SNV	c(-3, 7)	KLF4	jaspar2018	MA0039.3	MA0039.3	agggtccaaaGggtgtccagt	0.957789	0.791759	9.56563	7.94305	7.67708e-05	0.00233436	1	-1.62258	-0.162613	strong
chr10	112272112	112272112	1	+	rs149648716	G	T	SNV	c(-9, 4)	PLAG1	jaspar2018	MA0163.1	MA0163.1	tggagggtccaaaGggtgtccagttct	0.836159	0.796186	11.8282	11.274	2.92845e-05	0.000106145	1	-0.554218	-0.0393068	weak
chr19	1095646	1095646	1	-	rs17526231	A	G	SNV	c(-4, 9)	E2F7	jaspar2018	MA0758.1	MA0758.1	ggggcgaagtgtgGgcggggaaactga	0.684795	0.763055	15.9692	17.789	0.000563715	6.81952e-05	1	1.81984	0.0781087	strong
chr19	1095646	1095646	1	+	rs17526231	A	G	SNV	c(-6, 4)	Egr1	jaspar2018	MA0162.1	MA0162.1	gcgaagtgtgGgcggggaaac	0.797274	0.911145	8.03055	9.14881	0.000869989	3.79086e-05	1	1.11826	0.111587	strong
chr19	1095646	1095646	1	-	rs17526231	A	G	SNV	c(-6, 7)	EGR1	jaspar2018	MA0162.2	MA0162.2	ggggcgaagtgtgGgcggggaaactga	0.798202	0.941391	9.42416	11.0962	0.000853244	1.1906e-05	1	1.67202	0.141931	strong
chr19	1095646	1095646	1	-	rs17526231	A	G	SNV	c(-7, 7)	EGR2	jaspar2018	MA0472.1	MA0472.1	gggggcgaagtgtgGgcggggaaactgag	0.871826	0.981899	10.2741	11.5543	0.000188382	1.59815e-06	1	1.28019	0.108815	strong
chr19	1095646	1095646	1	-	rs17526231	A	G	SNV	c(-6, 4)	EGR2	jaspar2018	MA0472.2	MA0472.2	gcgaagtgtgGgcggggaaac	0.749839	0.870793	10.4426	12.1148	0.000998497	5.31673e-05	1	1.67218	0.120292	strong
chr19	1095646	1095646	1	-	rs17526231	A	G	SNV	c(-8, 6)	EGR3	jaspar2018	MA0732.1	MA0732.1	gggggcgaagtgtgGgcggggaaactgag	0.728758	0.845406	12.1712	14.0975	0.0011379	6.35581e-05	1	1.92622	0.115687	strong
chr19	1095646	1095646	1	-	rs17526231	A	G	SNV	c(-9, 6)	EGR4	jaspar2018	MA0733.1	MA0733.1	cgggggcgaagtgtgGgcggggaaactgagg	0.759658	0.885894	8.96068	10.3941	0.000867404	3.05502e-05	1	1.43341	0.122621	strong
chr19	1095646	1095646	1	+	rs17526231	A	G	SNV	c(-8, 4)	EOMES	jaspar2018	MA0800.1	MA0800.1	gggcgaagtgtgAgcggggaaactg	0.92768	0.758791	10.2027	8.38222	5.29885e-05	0.00280343	1	-1.82051	-0.165768	strong
chr19	1095646	1095646	1	-	rs17526231	A	G	SNV	c(-3, 7)	KLF16	jaspar2018	MA0741.1	MA0741.1	gcgaagtgtgGgcggggaaac	0.742999	0.913686	8.50507	10.4313	0.00294948	5.10216e-05	1	1.92621	0.168887	strong
chr19	1095646	1095646	1	+	rs17526231	A	G	SNV	c(-2, 7)	Klf4	jaspar2018	MA0039.2	MA0039.2	cgaagtgtgGgcggggaaa	0.788679	0.961837	8.70807	10.5924	0.0024786	4.673e-05	1	1.88434	0.171184	strong
chr19	1095646	1095646	1	-	rs17526231	A	G	SNV	c(-2, 7)	KLF5	jaspar2018	MA0599.1	MA0599.1	cgaagtgtgGgcggggaaa	0.810339	0.98496	9.31028	11.3092	0.00182533	1.71661e-05	1	1.99891	0.1741	strong
chr19	1095646	1095646	1	+	rs17526231	A	G	SNV	c(-7, -1)	MGA	jaspar2018	MA0801.1	MA0801.1	aagtgtgAgcgggga	0.944936	0.780469	9.21557	7.62833	6.10352e-05	0.00273132	1	-1.58724	-0.162844	strong
chr19	1095646	1095646	1	-	rs17526231	A	G	SNV	c(-3, 7)	SP1	jaspar2018	MA0079.3	MA0079.3	gcgaagtgtgGgcggggaaac	0.77614	0.948233	9.06852	11.0669	0.00252962	1.7643e-05	1	1.99835	0.171268	strong
chr19	1095646	1095646	1	-	rs17526231	A	G	SNV	c(-7, 7)	SP2	jaspar2018	MA0516.1	MA0516.1	gggggcgaagtgtgGgcggggaaactgag	0.770187	0.927596	8.96035	10.759	0.00231329	2.80887e-05	1	1.79867	0.15524	strong
chr19	1095646	1095646	1	-	rs17526231	A	G	SNV	c(-3, 7)	SP3	jaspar2018	MA0746.1	MA0746.1	gcgaagtgtgGgcggggaaac	0.749522	0.942982	6.42757	8.03256	0.00485182	4.86374e-05	1	1.60499	0.188698	strong
chr19	1095646	1095646	1	-	rs17526231	A	G	SNV	c(-6, 10)	SP4	jaspar2018	MA0685.1	MA0685.1	gcgggggcgaagtgtgGgcggggaaactgaggc	0.745735	0.859671	13.0908	15.0738	0.000575217	2.16502e-05	1	1.98294	0.113207	strong
chr19	1095646	1095646	1	-	rs17526231	A	G	SNV	c(-4, 7)	SP8	jaspar2018	MA0747.1	MA0747.1	ggcgaagtgtgGgcggggaaact	0.723478	0.902177	7.04938	8.75266	0.00422364	5.93662e-05	1	1.70328	0.175867	strong
chr19	1095646	1095646	1	+	rs17526231	A	G	SNV	c(-7, 2)	TBR1	jaspar2018	MA0802.1	MA0802.1	cgaagtgtgAgcggggaaa	0.903591	0.746944	10.1295	8.40219	8.01086e-05	0.0028801	1	-1.72729	-0.154325	strong
chr19	1095646	1095646	1	+	rs17526231	A	G	SNV	c(-7, -1)	TBX1	jaspar2018	MA0805.1	MA0805.1	aagtgtgAgcgggga	0.942481	0.780919	11.4283	9.48397	1.52588e-05	0.00135803	1	-1.94438	-0.16042	strong
chr19	1095646	1095646	1	+	rs17526231	A	G	SNV	c(-8, 1)	TBX21	jaspar2018	MA0690.1	MA0690.1	cgaagtgtgAgcggggaaa	0.906549	0.751862	11.2345	9.34055	4.76837e-05	0.00184822	1	-1.89399	-0.153003	strong
chr19	1095646	1095646	1	+	rs17526231	A	G	SNV	c(-7, -1)	TBX4	jaspar2018	MA0806.1	MA0806.1	aagtgtgAgcgggga	0.943872	0.839106	8.27301	7.36828	6.10352e-05	0.0012207	1	-0.904729	-0.103307	strong
chr5	96272199	96272199	1	-	rs183260325	C	A	SNV	c(-12, 7)	PPARG::RXRA	jaspar2018	MA0065.1	MA0065.1	agttggcagctcaggtttgAccccggaggaggcggtgtc	0.696293	0.772745	13.706	15.1866	0.00053258	5.81521e-05	1	1.4806	0.0755883	strong
chr5	96272199	96272199	1	-	rs183260325	C	A	SNV	c(-9, 4)	Rxra	jaspar2018	MA0512.2	MA0512.2	cagctcaggtttgAccccggaggaggc	0.679142	0.766093	14.4605	16.3054	0.000864983	7.52956e-05	1	1.8449	0.0867439	strong
chr5	96272199	96272199	1	-	rs183260325	C	A	SNV	c(-9, 4)	RXRB	jaspar2018	MA0855.1	MA0855.1	cagctcaggtttgAccccggaggaggc	0.677775	0.767673	14.8018	16.7595	0.000826657	6.61947e-05	1	1.95768	0.0897245	strong
chr5	96272199	96272199	1	-	rs183260325	C	A	SNV	c(-9, 4)	RXRG	jaspar2018	MA0856.1	MA0856.1	cagctcaggtttgAccccggaggaggc	0.68181	0.775261	14.2025	16.1445	0.000937376	6.93537e-05	1	1.94198	0.0932984	strong
chr5	96272199	96272199	1	+	rs183260325	C	A	SNV	c(-2, 11)	ZIC1	jaspar2018	MA0696.1	MA0696.1	cagctcaggtttgCccccggaggaggc	0.817809	0.733746	13.6606	12.2674	5.67734e-05	0.000596151	1	-1.3932	-0.0835248	strong
chr5	96272199	96272199	1	+	rs183260325	C	A	SNV	c(-2, 12)	ZIC3	jaspar2018	MA0697.1	MA0697.1	gcagctcaggtttgCccccggaggaggcg	0.826801	0.774621	12.3008	11.5351	6.99423e-05	0.000308407	1	-0.765722	-0.0515901	strong
chr5	96272199	96272199	1	+	rs183260325	C	A	SNV	c(-2, 12)	ZIC4	jaspar2018	MA0751.1	MA0751.1	gcagctcaggtttgCccccggaggaggcg	0.862028	0.808077	9.62259	9.03418	8.05231e-05	0.0004003	1	-0.588404	-0.0528791	weak
chr19	1132736	1132736	1	+	rs186598082	C	G	SNV	c(-8, 3)	HINFP	jaspar2018	MA0131.2	MA0131.2	aagcaaagtccGctccctgctct	0.813445	0.917785	9.45455	10.6548	0.000969529	7.35521e-05	1	1.20026	0.103466	strong
chr19	1132736	1132736	1	+	rs186598082	C	G	SNV	c(-8, 1)	HINFP	jaspar2018	MA0131.1	MA0131.1	gcaaagtccGctccctgct	0.782557	0.91948	7.87889	9.22739	0.0013485	6.19888e-05	1	1.3485	0.134575	strong
chr19	1132736	1132736	1	+	rs186598082	C	G	SNV	c(-3, 6)	KLF5	jaspar2018	MA0599.1	MA0599.1	gcaaagtccCctccctgct	0.980389	0.922125	11.2569	10.5899	3.33786e-05	0.000193596	1	-0.666956	-0.0580904	weak
chr19	1132736	1132736	1	+	rs186598082	C	G	SNV	c(-3, 7)	SP1	jaspar2018	MA0079.3	MA0079.3	agcaaagtccCctccctgctc	0.921405	0.749312	10.7553	8.75699	6.65188e-05	0.00379848	1	-1.99835	-0.171268	strong
chr12	68436456	68436456	1	+	rs191388465	G	A	SNV	c(-5, 5)	ESRRA	jaspar2018	MA0592.1	MA0592.1	gatggctaagGtcacaccacg	0.924847	0.77524	11.8422	9.94001	1.83582e-05	0.00120974	1	-1.9022	-0.148635	strong
chr12	68436456	68436456	1	+	rs191388465	G	A	SNV	c(-8, 3)	Esrrb	jaspar2018	MA0141.2	MA0141.2	ggatggctaagGtcacaccacga	0.945526	0.786335	11.2126	9.34293	4.23193e-05	0.0013634	1	-1.86966	-0.157746	strong
chr12	68436456	68436456	1	+	rs191388465	G	A	SNV	c(-8, 3)	Esrrb	jaspar2018	MA0141.1	MA0141.1	ggatggctaagGtcacaccacga	0.944679	0.786117	11.0501	9.21419	4.23789e-05	0.00137877	1	-1.83594	-0.157043	strong
chr12	68436456	68436456	1	+	rs191388465	G	A	SNV	c(-5, 5)	ESRRB	jaspar2018	MA0141.3	MA0141.3	gatggctaagGtcacaccacg	0.875624	0.749616	13.536	11.5983	5.74589e-05	0.00130367	1	-1.93764	-0.125426	strong
chr12	68436456	68436456	1	+	rs191388465	G	A	SNV	c(-5, 4)	Esrrg	jaspar2018	MA0643.1	MA0643.1	atggctaagGtcacaccac	0.953335	0.788849	11.5081	9.53613	4.673e-05	0.00128174	1	-1.97193	-0.163408	strong
chr12	68436456	68436456	1	+	rs191388465	G	A	SNV	c(-5, 5)	NR2F2	jaspar2018	MA1111.1	MA1111.1	gatggctaagGtcacaccacg	0.995394	0.833227	10.3163	8.65801	1.97887e-05	0.00107265	1	-1.65825	-0.160011	strong
chr12	68436456	68436456	1	+	rs191388465	G	A	SNV	c(-5, 4)	NR4A1	jaspar2018	MA1112.1	MA1112.1	atggctaagGtcacaccac	0.970745	0.810403	11.5808	9.68409	3.91006e-05	0.00119972	1	-1.89676	-0.159032	strong
chr12	68436456	68436456	1	+	rs191388465	G	A	SNV	c(-5, 5)	Rxra	jaspar2018	MA0512.1	MA0512.1	gatggctaagGtcacaccacg	0.939767	0.864764	10.5497	9.71422	2.76566e-05	0.000356674	1	-0.835515	-0.0744618	strong
chr8	129617654	129617654	1	-	rs6993958	A	G	SNV	c(-4, 10)	EGR2	jaspar2018	MA0472.1	MA0472.1	caagagcctctgggGtgggggaatcagag	0.742957	0.914074	8.77527	10.7654	0.00330266	6.08563e-05	1	1.99015	0.169162	strong
chr8	129617654	129617654	1	+	rs6993958	A	G	SNV	c(-3, 6)	Klf4	jaspar2018	MA0039.2	MA0039.2	gcctctgggGtgggggaat	0.791947	0.959978	8.74363	10.5722	0.00229263	5.53131e-05	1	1.82855	0.166115	strong
chr8	129617654	129617654	1	-	rs6993958	A	G	SNV	c(-3, 6)	KLF5	jaspar2018	MA0599.1	MA0599.1	gcctctgggGtgggggaat	0.813476	0.988097	9.34619	11.3451	0.00168991	1.14441e-05	1	1.99891	0.1741	strong
chr8	129617654	129617654	1	-	rs6993958	A	G	SNV	c(-4, 6)	SP1	jaspar2018	MA0079.3	MA0079.3	agcctctgggGtgggggaatc	0.784974	0.957067	9.1711	11.1694	0.00221872	1.23978e-05	1	1.99835	0.171268	strong
chr1	198571098	198571098	1	+	rs1961828	G	A	SNV	c(-3, 4)	MEIS3	jaspar2018	MA0775.1	MA0775.1	catggtgAcaggaga	0.81392	0.987536	6.6181	8.00571	0.00453186	7.62939e-05	1	1.38761	0.171197	strong
chr1	198571098	198571098	1	+	rs1961828	G	A	SNV	c(1, 20)	ZNF263	jaspar2018	MA0528.1	MA0528.1	aacactttattcacatggtgGcaggagagagagagtgagca	0.772714	0.73037	8.79202	8.32903	6.78634e-05	0.00032695	1	-0.462983	-0.0410551	weak
chr12	6562285	6562285	1	-	rs2041384	C	G	SNV	c(-2, 10)	ELF1	jaspar2018	MA0473.1	MA0473.1	ggtcctagactgCttcctggcgaag	0.920413	0.80114	11.2042	9.77058	7.8395e-05	0.00129889	1	-1.43361	-0.117888	strong
chr12	6562285	6562285	1	-	rs2041384	C	G	SNV	c(-3, 7)	Erg	jaspar2018	MA0474.1	MA0474.1	tcctagactgCttcctggcga	0.956905	0.868592	11.3558	10.3162	5.34058e-05	0.00048995	1	-1.03963	-0.0876355	strong
chr12	6562285	6562285	1	+	rs2041384	C	G	SNV	c(-4, 10)	Ets1	jaspar2018	MA0098.2	MA0098.2	gtggtcctagactgCttcctggcgaagga	0.93266	0.843969	10.9277	9.90505	2.88626e-05	0.000447099	1	-1.02268	-0.0873773	strong
chr12	6562285	6562285	1	-	rs2041384	C	G	SNV	c(-3, 7)	FLI1	jaspar2018	MA0475.1	MA0475.1	tcctagactgCttcctggcga	0.948211	0.850059	10.878	9.7629	3.05176e-05	0.000597954	1	-1.11506	-0.0972466	strong
chr19	1095122	1095122	1	-	rs2074446	C	G	SNV	c(-10, 3)	Tcfcp2l1	jaspar2018	MA0145.2	MA0145.2	tccccggcgacctCtgggcctcccgta	0.916059	0.740453	8.77928	7.12462	0.000100404	0.00447461	1	-1.65466	-0.172897	strong
chr19	1095122	1095122	1	-	rs2074446	C	G	SNV	c(-10, 3)	Tcfcp2l1	jaspar2018	MA0145.1	MA0145.1	tccccggcgacctCtgggcctcccgta	0.916539	0.740489	8.75909	7.10495	0.000100162	0.00453796	1	-1.65414	-0.17333	strong
chr6	167372978	167372978	1	+	rs2149092	C	T	SNV	c(-5, 2)	EHF	jaspar2018	MA0598.1	MA0598.1	tcacttcCtcctgta	0.99817	0.961034	12.9332	12.4521	4.57764e-05	9.15527e-05	1	-0.481083	-0.0371294	weak
chr6	167372978	167372978	1	+	rs2149092	C	T	SNV	c(-5, 9)	Ets1	jaspar2018	MA0098.2	MA0098.2	attcttgtcacttcTtcctgtactgccca	0.908121	0.958047	10.6448	11.2205	6.65216e-05	7.95536e-06	1	0.575693	0.0491868	weak
chr6	167372978	167372978	1	-	rs2149092	C	T	SNV	c(-6, 3)	ETV6	jaspar2018	MA0645.1	MA0645.1	tgtcacttcCtcctgtact	0.951907	0.850538	10.6937	9.56772	6.29425e-05	0.00069046	1	-1.12595	-0.100282	strong
chr6	167372978	167372978	1	-	rs2149092	C	T	SNV	c(-5, 12)	EWSR1-FLI1	jaspar2018	MA0149.1	MA0149.1	agaattcttgtcacttcCtcctgtactgcccactt	0.683051	0.620975	21.1178	19.2079	6.03427e-05	0.000525495	1	-1.90988	-0.0618702	strong
chr6	167372978	167372978	1	-	rs2149092	C	T	SNV	c(-7, 7)	Spi1	jaspar2018	MA0080.3	MA0080.3	attcttgtcacttcCtcctgtactgccca	0.952958	0.836452	11.4068	10.0359	1.12969e-06	0.000319446	1	-1.37096	-0.114625	strong
chr6	167372978	167372978	1	-	rs2149092	C	T	SNV	c(-6, 7)	SPI1	jaspar2018	MA0080.4	MA0080.4	ttcttgtcacttcCtcctgtactgccc	0.806388	0.711812	16.4494	14.5292	5.05485e-05	0.000679005	1	-1.92018	-0.094217	strong
chr6	167372978	167372978	1	-	rs2149092	C	T	SNV	c(-5, 1)	SPI1	jaspar2018	MA0080.2	MA0080.2	cacttcCtcctgt	1	0.92978	7.92911	7.38015	0	0.00012207	1	-0.548963	-0.0692339	weak
chr6	2903584	2903584	1	+	rs2236276	G	A	SNV	c(-8, 4)	NR2F1	jaspar2018	MA0017.2	MA0017.2	taccgcagggtcAggcgcctcccac	0.7785	0.938983	9.42211	11.3292	0.00215751	9.67383e-05	1	1.90708	0.158208	strong
chr10	8095340	8095340	1	-	rs2275806	G	A	SNV	c(-1, 9)	FOXH1	jaspar2018	MA0479.1	MA0479.1	cgagcagagaGtggatttgga	0.910125	0.751597	11.5152	9.51699	9.44138e-05	0.00283122	1	-1.99825	-0.157988	strong
chr10	75669013	75669013	1	+	rs2459449	T	C	SNV	c(-2, 8)	EBF1	jaspar2018	MA0154.2	MA0154.2	atcatgacggCccctgggaat	0.820858	0.939105	9.3054	10.6399	0.00134969	3.00407e-05	1	1.33445	0.117811	strong
chr10	75669013	75669013	1	+	rs2459449	T	C	SNV	c(-1, 8)	EBF1	jaspar2018	MA0154.1	MA0154.1	tcatgacggCccctgggaa	0.873325	0.954109	7.51823	8.19849	0.00043869	4.95911e-05	1	0.68026	0.079239	weak
chr10	75669013	75669013	1	+	rs2459449	T	C	SNV	c(-3, 10)	EBF1	jaspar2018	MA0154.3	MA0154.3	tgaatcatgacggCccctgggaatttc	0.850744	0.882447	12.3942	12.8499	0.000142358	4.50015e-05	1	0.45572	0.0313431	weak
chr22	37491140	37491140	1	+	rs2543511	A	G	SNV	c(-6, 11)	EWSR1-FLI1	jaspar2018	MA0149.1	MA0149.1	gggaaggaaaggaaaagAgggaaggagcgttcttg	0.734403	0.721235	22.6977	22.2926	9.90691e-06	2.16185e-05	1	-0.40513	-0.0131241	weak
chr22	37491140	37491140	1	+	rs2543511	A	G	SNV	c(-5, 8)	SPI1	jaspar2018	MA0080.4	MA0080.4	aggaaaggaaaagGgggaaggagcgtt	0.751024	0.827703	15.3254	16.8822	0.000181071	1.87717e-05	1	1.55682	0.0763884	strong
chr12	6561145	6561145	1	+	rs7132503	G	A	SNV	c(-9, 1)	EBF1	jaspar2018	MA0154.2	MA0154.2	aatcaccaggGgatttccggg	0.919447	0.742267	10.418	8.41848	7.24792e-05	0.00459599	1	-1.99953	-0.176527	strong
chr12	6561145	6561145	1	+	rs7132503	G	A	SNV	c(-2, 8)	NFKB1	jaspar2018	MA0105.2	MA0105.2	aatcaccaggGgatttccggg	0.9006	0.757799	10.3689	8.76064	4.19617e-05	0.00143409	1	-1.60822	-0.139987	strong
chr12	6561145	6561145	1	+	rs7132503	G	A	SNV	c(-2, 8)	NFKB1	jaspar2018	MA0105.3	MA0105.3	aatcaccaggGgatttccggg	0.972333	0.842241	12.0363	10.4363	1.83582e-05	0.000387192	1	-1.60001	-0.129278	strong
chr12	6561145	6561145	1	+	rs7132503	G	A	SNV	c(-2, 7)	REL	jaspar2018	MA0101.1	MA0101.1	atcaccaggGgatttccgg	1	0.8722	7.34539	6.42978	0	0.00025177	1	-0.915614	-0.124651	strong
chr12	6561145	6561145	1	+	rs7132503	G	A	SNV	c(-2, 7)	RELA	jaspar2018	MA0107.1	MA0107.1	atcaccaggGgatttccgg	0.983378	0.83531	10.8639	9.25566	3.8147e-06	0.000436783	1	-1.60822	-0.145614	strong
chr10	75645882	75645882	1	-	rs2633303	G	T	SNV	c(-4, 7)	ZBTB7B	jaspar2018	MA0694.1	MA0694.1	cgcttatattgGtggtggtgcca	0.912426	0.853497	11.3455	10.6234	5.57303e-05	0.000300646	1	-0.722093	-0.0581462	strong
chr19	49217605	49217605	1	+	rs281388	T	G	SNV	c(-8, 2)	NRF1	jaspar2018	MA0506.1	MA0506.1	gtccgcaagcGcatagccccg	0.766294	0.87232	9.73417	11.0789	0.00108266	7.86781e-05	1	1.34472	0.105898	strong
chr19	1076025	1076025	1	-	rs34397138	C	A	SNV	c(-6, 4)	Spz1	jaspar2018	MA0111.1	MA0111.1	gcagcctgaaAcccttttttc	0.813638	0.912249	5.72554	6.39729	0.000287771	1.12057e-05	1	0.671752	0.0960322	weak
chr5	35815846	35815846	1	-	rs35081631	G	C	SNV	c(-6, 12)	CTCF	jaspar2018	MA0139.1	MA0139.1	ctgtttctgttcttgctcCccctacaggctgttttta	0.728227	0.859942	10.09	11.8673	0.00141174	3.00618e-05	1	1.77731	0.129191	strong
chr5	35815846	35815846	1	-	rs35081631	G	C	SNV	c(-3, 6)	MZF1(var.2)	jaspar2018	MA0057.1	MA0057.1	ttcttgctcCccctacagg	0.819705	0.991118	4.97933	5.9852	0.00325108	5.72205e-06	1	1.00588	0.16661	strong
chr5	35815846	35815846	1	-	rs35081631	G	C	SNV	c(-1, 11)	TFAP2A(var.3)	jaspar2018	MA0872.1	MA0872.1	ctgttcttgctcGccctacaggctg	0.904328	0.855509	11.1654	10.5726	8.69483e-05	0.000285357	1	-0.592769	-0.048087	weak
chr5	35815846	35815846	1	+	rs35081631	G	C	SNV	c(-1, 11)	TFAP2B(var.3)	jaspar2018	MA0813.1	MA0813.1	ctgttcttgctcGccctacaggctg	0.93142	0.880173	11.6647	11.0291	2.78652e-05	0.00016892	1	-0.635582	-0.0507845	weak
chr5	35815846	35815846	1	+	rs35081631	G	C	SNV	c(-1, 11)	TFAP2C(var.3)	jaspar2018	MA0815.1	MA0815.1	ctgttcttgctcGccctacaggctg	0.902308	0.846351	11.4639	10.7603	7.70837e-05	0.000282958	1	-0.703592	-0.0554347	strong
chr19	1113520	1113520	1	+	rs371581389	C	T	SNV	c(-4, 9)	CREB3	jaspar2018	MA0638.1	MA0638.1	acactccagctgcCacgtcccacccac	0.873612	0.788966	12.0119	10.8653	7.61002e-05	0.000708241	1	-1.14659	-0.0835473	strong
chr19	1113520	1113520	1	+	rs371581389	C	T	SNV	c(-4, 9)	CREB3L1	jaspar2018	MA0839.1	MA0839.1	acactccagctgcCacgtcccacccac	0.887749	0.767914	13.9337	12.082	1.31577e-05	0.000391744	1	-1.85163	-0.118178	strong
chr19	1113520	1113520	1	+	rs371581389	C	T	SNV	c(-3, 8)	HES5	jaspar2018	MA0821.1	MA0821.1	actccagctgcCacgtcccaccc	0.848531	0.734597	14.8841	12.8896	7.96318e-05	0.00113922	1	-1.99456	-0.113742	strong
chr19	1113520	1113520	1	+	rs371581389	C	T	SNV	c(-3, 8)	HES7	jaspar2018	MA0822.1	MA0822.1	actccagctgcCacgtcccaccc	0.82474	0.720419	15.5635	13.5998	4.91738e-05	0.000788152	1	-1.96367	-0.104105	strong
chr19	1113520	1113520	1	+	rs371581389	C	T	SNV	c(-1, 18)	RREB1	jaspar2018	MA0073.1	MA0073.1	cccaccacactccagctgcCacgtcccacccacctccgc	0.827547	0.747434	10.8215	9.81217	1.41184e-05	0.000261885	1	-1.00937	-0.0776779	strong
chr19	1113520	1113520	1	-	rs371581389	C	T	SNV	c(-9, -1)	TFAP4	jaspar2018	MA0691.1	MA0691.1	tccagctgcTacgtcccac	0.890898	0.93068	11.7134	12.2314	0.000219345	8.96454e-05	1	0.51799	0.039439	weak
chr12	6493096	6493096	1	-	rs3759336	C	T	SNV	c(-2, 8)	E2F1	jaspar2018	MA0024.2	MA0024.2	accccgggccTgccgcccttc	0.771698	0.951929	8.52104	10.5096	0.00416374	5.8651e-05	1	1.98858	0.180124	strong
chr12	6493096	6493096	1	-	rs3759336	C	T	SNV	c(-2, 15)	EWSR1-FLI1	jaspar2018	MA0149.1	MA0149.1	agggctgaccccgggccTgccgcccttccctcggc	0.668185	0.721409	20.6604	22.2979	0.000135631	2.14239e-05	1	1.63752	0.053047	strong
chr12	6493096	6493096	1	-	rs3759336	C	T	SNV	c(-17, 3)	REST	jaspar2018	MA0138.2	MA0138.2	ccaagggctgaccccgggccTgccgcccttccctcggctgg	0.715338	0.775951	14.6838	15.8913	0.000194316	2.71742e-05	1	1.20748	0.0593225	strong
chr12	6493096	6493096	1	+	rs3759336	C	T	SNV	c(-16, 2)	REST	jaspar2018	MA0138.1	MA0138.1	aagggctgaccccgggccTgccgcccttccctcggct	0.716133	0.79422	12.5135	13.839	0.000191132	1.36547e-05	1	1.32552	0.0764777	strong
chr12	6493096	6493096	1	+	rs3759336	C	T	SNV	c(-4, 10)	SP2	jaspar2018	MA0516.1	MA0516.1	gctgaccccgggccCgccgcccttccctc	0.918227	0.835221	10.652	9.70348	4.27086e-05	0.00065519	1	-0.948486	-0.0818623	strong
chr12	6493096	6493096	1	+	rs3759336	C	T	SNV	c(-12, 1)	Zfx	jaspar2018	MA0146.1	MA0146.1	ctgaccccgggccTgccgcccttccct	0.795423	0.96572	9.15779	11.0819	0.00178996	4.26434e-05	1	1.92416	0.167766	strong
chr12	6493096	6493096	1	+	rs3759336	C	T	SNV	c(-12, 1)	Zfx	jaspar2018	MA0146.2	MA0146.2	ctgaccccgggccTgccgcccttccct	0.794459	0.966149	9.1884	11.1374	0.0018477	4.23156e-05	1	1.94897	0.169157	strong
chr22	37625644	37625644	1	-	rs4140870	T	C	SNV	c(-2, 8)	Spz1	jaspar2018	MA0111.1	MA0111.1	aggcagttgcTgcttccctca	0.88255	0.785672	6.19498	5.53502	3.33786e-05	0.000617743	1	-0.659954	-0.0943455	weak
chr5	96293153	96293153	1	+	rs4360063	A	G	SNV	c(-4, 5)	LBX2	jaspar2018	MA0699.1	MA0699.1	taggttgcaAttagagttg	0.988311	0.822246	5.99982	5.02094	0.000132561	0.00480556	1	-0.978889	-0.1613	strong
chr5	96293153	96293153	1	+	rs4360063	A	G	SNV	c(-3, 4)	MSX2	jaspar2018	MA0708.1	MA0708.1	ggttgcaAttagagt	0.99269	0.783274	9.16216	7.24933	7.62939e-05	0.00514221	1	-1.91283	-0.207265	strong
chr2	62533925	62533925	1	-	rs4630755	T	C	SNV	c(-7, 3)	Gata1	jaspar2018	MA0035.2	MA0035.2	ccgatgttatCtgatgctgtc	0.77346	0.979604	7.58529	9.5819	0.00573897	8.74996e-05	1	1.99661	0.204164	strong
chr2	62533925	62533925	1	+	rs4630755	T	C	SNV	c(-10, 3)	GATA2	jaspar2018	MA0036.2	MA0036.2	actccgatgttatCtgatgctgtctaa	0.781447	0.952109	9.24513	11.242	0.00226162	5.28954e-05	1	1.99688	0.169193	strong
chr2	62533925	62533925	1	-	rs4630755	T	C	SNV	c(-6, 1)	GATA3	jaspar2018	MA0037.3	MA0037.3	atgttatCtgatgct	0.770379	0.994817	6.88933	8.8773	0.0071106	3.05176e-05	1	1.98797	0.222786	strong
chr2	62533925	62533925	1	+	rs4630755	T	C	SNV	c(-6, 4)	Gata4	jaspar2018	MA0482.1	MA0482.1	ccgatgttatCtgatgctgtc	0.767089	0.933634	9.21445	11.2097	0.00281429	7.84397e-05	1	1.99521	0.166202	strong
chr2	62533925	62533925	1	-	rs4630755	T	C	SNV	c(-8, 4)	GATA6	jaspar2018	MA1104.1	MA1104.1	ctccgatgttatCtgatgctgtcta	0.756693	0.922297	8.27134	10.049	0.00254673	7.03186e-05	1	1.77764	0.16334	strong
chr2	62533925	62533925	1	-	rs4630755	T	C	SNV	c(-5, 12)	Tal1::Gata1	jaspar2018	MA0140.1	MA0140.1	gcgtactccgatgttatCtgatgctgtctaaggtt	0.751394	0.956863	7.3489	9.30103	0.00583294	5.68588e-05	1	1.95213	0.201025	strong
chr21	34817738	34817738	1	+	rs4816457	T	C	SNV	c(-6, 4)	FOXA1	jaspar2018	MA0148.2	MA0148.2	gtcttgttttCcttagcatgg	0.816786	0.930736	8.70128	9.90026	0.0011611	0.000101805	1	1.19899	0.112803	strong
chr21	34817738	34817738	1	+	rs4816457	T	C	SNV	c(-6, 4)	FOXA1	jaspar2018	MA0148.1	MA0148.1	gtcttgttttCcttagcatgg	0.817641	0.9311	8.64173	9.82493	0.00114679	0.000102282	1	1.18321	0.112222	strong
chr21	34817738	34817738	1	+	rs4816457	T	C	SNV	c(-9, 1)	Foxo1	jaspar2018	MA0480.1	MA0480.1	gtcttgttttCcttagcatgg	0.868696	0.935721	10.2834	11.071	0.00045681	6.84261e-05	1	0.787601	0.0665974	strong
chr10	75634053	75634053	1	+	rs527295252	G	A	SNV	c(-3, 6)	MZF1(var.2)	jaspar2018	MA0057.1	MA0057.1	ggcggccgaGggggagccg	0.98514	0.914636	5.95012	5.5364	1.71661e-05	0.000688553	1	-0.413726	-0.068528	weak
chr19	1103789	1103789	1	+	rs532171942	G	A	SNV	c(-6, 8)	Klf12	jaspar2018	MA0742.1	MA0742.1	gccagccaggccacGgcctcctagacaca	0.865794	0.801256	12.9509	11.9932	6.46561e-05	0.000367743	1	-0.957706	-0.0640929	strong
chr19	1103789	1103789	1	+	rs532171942	G	A	SNV	c(-8, 8)	SP4	jaspar2018	MA0685.1	MA0685.1	ccgccagccaggccacGgcctcctagacacaag	0.839666	0.733749	14.7256	12.8822	4.12505e-05	0.000765514	1	-1.84338	-0.105239	strong
chr19	1103789	1103789	1	-	rs532171942	G	A	SNV	c(-8, 5)	Zfx	jaspar2018	MA0146.1	MA0146.1	ccagccaggccacGgcctcctagacac	0.987794	0.937803	11.3314	10.7665	4.28781e-06	0.000159826	1	-0.564841	-0.0492482	weak
chr19	1103789	1103789	1	-	rs532171942	G	A	SNV	c(-8, 5)	Zfx	jaspar2018	MA0146.2	MA0146.2	ccagccaggccacGgcctcctagacac	0.987753	0.938551	11.3826	10.8241	4.32134e-06	0.000158932	1	-0.558524	-0.0484761	weak
chr11	60869612	60869612	1	+	rs546241	A	G	SNV	c(-6, 4)	Klf1	jaspar2018	MA0493.1	MA0493.1	gcctctccccAcccagacccc	0.916779	0.867464	10.9003	10.3185	6.31809e-05	0.000266075	1	-0.581794	-0.0489638	weak
chr11	60869612	60869612	1	+	rs546241	A	G	SNV	c(-5, 9)	SP2	jaspar2018	MA0516.1	MA0516.1	tcccgcctctccccGcccagacccctgcc	0.857758	0.913062	9.961	10.5929	0.000361242	5.44926e-05	1	0.631946	0.0545422	weak
chr19	1030981	1030981	1	-	rs550175103	C	A	SNV	c(-13, -1)	Rfx1	jaspar2018	MA0509.1	MA0509.1	gttgccctggagtCcccggccccaccc	0.890389	0.854539	11.493	11.0383	1.21333e-05	4.62048e-05	1	-0.454694	-0.0352935	weak
chr19	1030981	1030981	1	-	rs550175103	C	A	SNV	c(-18, -1)	RFX2	jaspar2018	MA0600.1	MA0600.1	ctgctgttgccctggagtCcccggccccaccctctgc	0.884945	0.844723	12.0638	11.5258	5.62529e-06	2.74286e-05	1	-0.538007	-0.0395513	weak
chr19	1030981	1030981	1	-	rs550175103	C	A	SNV	c(1, 9)	SP1	jaspar2018	MA0079.1	MA0079.1	ccctggagtAcccggcccc	0.85719	0.969499	4.55209	5.11706	0.0017004	2.86102e-05	1	0.564971	0.107195	weak
chr13	100022986	100022986	1	+	rs72651010	C	T	SNV	c(-5, 3)	HIC2	jaspar2018	MA0738.1	MA0738.1	cacgtgccCattgactt	0.988784	0.878663	7.14102	6.35844	0.000110626	0.0022316	1	-0.782577	-0.108379	strong
chr10	75619500	75619500	1	+	rs562934451	C	T	SNV	c(-9, -1)	MSC	jaspar2018	MA0665.1	MA0665.1	cacagctgaTgttctgact	0.824106	0.890913	10.6944	11.5556	0.000208855	2.67029e-05	1	0.861136	0.066437	strong
chr10	75619500	75619500	1	+	rs562934451	C	T	SNV	c(-11, 2)	Tcf21	jaspar2018	MA0832.1	MA0832.1	cctgcacagctgaTgttctgactacct	0.796768	0.854654	13.318	14.2781	0.000249941	5.26346e-05	1	0.960121	0.0575307	strong
chr7	50252408	50252408	1	+	rs57453899	G	A	SNV	c(-6, 7)	CTCFL	jaspar2018	MA1102.1	MA1102.1	gagtacccagcagGggacagagtgggg	0.867041	0.767097	11.0581	9.81898	7.59736e-05	0.000903647	1	-1.23908	-0.097516	strong
chr7	50252408	50252408	1	-	rs57453899	G	A	SNV	c(-14, 4)	REST	jaspar2018	MA0138.1	MA0138.1	tgacagagtacccagcagAggacagagtggggctggc	0.68232	0.760407	11.9395	13.265	0.000517187	4.60365e-05	1	1.32552	0.0764777	strong
chr7	50252408	50252408	1	+	rs57453899	G	A	SNV	c(-3, 7)	Rxra	jaspar2018	MA0512.1	MA0512.1	tacccagcagAggacagagtg	0.813346	0.929321	9.14144	10.4334	0.00120735	5.50747e-05	1	1.29193	0.115138	strong
chr7	50252408	50252408	1	-	rs57453899	G	A	SNV	c(-8, 5)	ZIC1	jaspar2018	MA0696.1	MA0696.1	gagtacccagcagGggacagagtgggg	0.826902	0.706629	13.8113	11.818	4.26956e-05	0.00114563	1	-1.9933	-0.119502	strong
chr7	50252408	50252408	1	-	rs57453899	G	A	SNV	c(-9, 5)	ZIC3	jaspar2018	MA0697.1	MA0697.1	agagtacccagcagGggacagagtggggc	0.822507	0.688631	12.2378	10.2732	8.00369e-05	0.00237243	1	-1.96457	-0.132362	strong
chr10	75617177	75617177	1	+	rs577670382	C	A	SNV	c(-6, 4)	Gfi1b	jaspar2018	MA0483.1	MA0483.1	tagcaaatccCagattcaaac	0.901428	0.837623	10.4404	9.70754	9.84669e-05	0.000643253	1	-0.732881	-0.0633287	strong
chr22	37614738	37614738	1	+	rs6000613	C	G	SNV	c(-10, 4)	EGR2	jaspar2018	MA0472.1	MA0472.1	gtgcctcacccccaCtctgccctgtagcg	0.94054	0.798625	11.0732	9.42271	4.22625e-05	0.00105017	1	-1.65052	-0.140293	strong
chr22	37614738	37614738	1	+	rs6000613	C	G	SNV	c(-10, -1)	KLF16	jaspar2018	MA0741.1	MA0741.1	ctcacccccaCtctgccctgt	0.89941	0.822174	10.2702	9.39856	8.4877e-05	0.000589609	1	-0.871614	-0.0764216	strong
chr22	37614738	37614738	1	+	rs6000613	C	G	SNV	c(-10, 1)	SP8	jaspar2018	MA0747.1	MA0747.1	cctcacccccaCtctgccctgta	0.905116	0.86255	8.78067	8.37495	5.4121e-05	0.00019151	1	-0.40572	-0.0418913	weak
chr21	34752841	34752841	1	-	rs62226376	C	A	SNV	c(-5, 4)	Atoh1	jaspar2018	MA0461.2	MA0461.2	gactgtcatAtgtccactg	0.87899	0.977932	8.80382	9.7845	0.000308037	5.05447e-05	1	0.980683	0.0980365	strong
chr21	34752841	34752841	1	+	rs62226376	C	A	SNV	c(-4, 3)	Bhlha15	jaspar2018	MA0607.1	MA0607.1	ctgtcatAtgtccac	0.89678	0.967749	9.62484	10.3862	0.000457764	7.62939e-05	1	0.761355	0.0709413	strong
chr21	34752841	34752841	1	-	rs62226376	C	A	SNV	c(-5, 4)	NEUROD2	jaspar2018	MA0668.1	MA0668.1	gactgtcatAtgtccactg	0.817215	0.961123	7.20907	8.46965	0.00189209	8.67844e-05	1	1.26058	0.143082	strong
chr21	34752841	34752841	1	-	rs62226376	C	A	SNV	c(-5, 4)	NEUROG2	jaspar2018	MA0669.1	MA0669.1	gactgtcatAtgtccactg	0.855497	0.964076	11.0855	12.4899	0.000239372	8.58307e-06	1	1.40432	0.108404	strong
chr21	34752841	34752841	1	+	rs62226376	C	A	SNV	c(-5, 4)	Twist2	jaspar2018	MA0633.1	MA0633.1	gactgtcatAtgtccactg	0.883702	0.975336	9.59818	10.5835	0.000617981	4.95911e-05	1	0.985272	0.0908197	strong
chr2	102875540	102875540	1	-	rs6719123	C	G	SNV	c(-8, 6)	MAFK	jaspar2018	MA0496.1	MA0496.1	cctctccatgtgctGaagtctggagaaat	0.803018	0.942156	9.75689	11.4204	0.00173736	0.000104312	1	1.66349	0.137343	strong
chr2	102875540	102875540	1	+	rs6719123	C	G	SNV	c(-8, 2)	NRL	jaspar2018	MA0842.1	MA0842.1	tccatgtgctGaagtctggag	0.853788	0.962146	5.81027	6.52763	0.00161123	0.000136614	1	0.717363	0.105833	strong
chr19	1088285	1088285	1	+	rs6843	T	C	SNV	c(-9, 1)	NRF1	jaspar2018	MA0506.1	MA0506.1	agcgcgtgcaCggctgtgaat	0.766287	0.873116	9.73408	11.089	0.00108361	7.72476e-05	1	1.3549	0.1067	strong
chr19	1088285	1088285	1	+	rs6843	T	C	SNV	c(-7, 12)	TP53	jaspar2018	MA0106.1	MA0106.1	ggtggcttgagcgcgtgcaTggctgtgaatggagtaaag	0.734737	0.647392	13.8195	12.2289	5.04338e-05	0.000840272	1	-1.59052	-0.0852833	strong
chr7	50237083	50237083	1	+	rs6957965	T	C	SNV	c(-3, 9)	ATF4	jaspar2018	MA0833.1	MA0833.1	attttcttagtcTgaagcaatgaca	0.930119	0.791021	12.9088	10.9926	1.9446e-05	0.000744507	1	-1.91623	-0.138142	strong
chr11	118741157	118741157	1	-	rs7117261	T	C	SNV	c(-2, 15)	EWSR1-FLI1	jaspar2018	MA0149.1	MA0149.1	gtccctgggcacttcccTggctgctctctttcccc	0.678102	0.624878	20.9655	19.328	8.02707e-05	0.000430955	1	-1.63752	-0.053047	strong
chr6	159528939	159528939	1	-	rs725786	T	C	SNV	c(-7, 6)	Mecom	jaspar2018	MA0029.1	MA0029.1	tgctcttcttaacTtttctctaacttg	0.843523	0.742404	12.0741	10.6537	5.82188e-05	0.000803515	1	-1.42045	-0.0995261	strong
chr6	159528939	159528939	1	-	rs725786	T	C	SNV	c(-5, 12)	PPARA::RXRA	jaspar2018	MA1148.1	MA1148.1	aggctgctcttcttaacCtttctctaacttgcttc	0.76142	0.830388	7.1954	7.81323	0.000492491	6.41306e-05	1	0.617834	0.0662013	weak
chr6	159528939	159528939	1	-	rs725786	T	C	SNV	c(-3, 11)	PRDM1	jaspar2018	MA0508.1	MA0508.1	ctgctcttcttaacCtttctctaacttgc	0.759074	0.854908	10.0755	11.3161	0.000827822	6.33169e-05	1	1.24058	0.0940236	strong
chr2	71079181	71079181	1	+	rs72836243	C	T	SNV	c(-3, 15)	REST	jaspar2018	MA0138.1	MA0138.1	agacatttataaagtgttCtattctggggtctgttta	0.762126	0.664022	13.2942	11.6289	4.3402e-05	0.000855586	1	-1.66531	-0.0960823	strong
chr19	49150048	49150048	1	-	rs73581711	G	T	SNV	c(-7, 2)	KLF5	jaspar2018	MA0599.1	MA0599.1	ctggggaggGgaagggagc	0.98455	0.87077	11.3045	10.002	1.90735e-05	0.000455856	1	-1.30245	-0.11344	strong
chr19	49150048	49150048	1	+	rs73581711	G	T	SNV	c(-5, 4)	MZF1(var.2)	jaspar2018	MA0057.1	MA0057.1	ctggggaggGgaagggagc	0.978057	0.832895	5.90856	5.05673	4.19617e-05	0.00270081	1	-0.851833	-0.141094	strong
chr19	49150048	49150048	1	-	rs73581711	G	T	SNV	c(-8, 2)	SP1	jaspar2018	MA0079.3	MA0079.3	gctggggaggGgaagggagcc	0.964982	0.890003	11.2614	10.3907	8.82149e-06	0.000200033	1	-0.870655	-0.0746191	strong
chr19	49150048	49150048	1	-	rs73581711	G	T	SNV	c(-12, 2)	SP2	jaspar2018	MA0516.1	MA0516.1	gtaggctggggaggGgaagggagcctgag	0.901789	0.818869	10.4641	9.51663	9.0193e-05	0.000942639	1	-0.9475	-0.0817772	strong
chr10	112215291	112215291	1	+	rs746946	G	A	SNV	c(-5, 13)	CTCF	jaspar2018	MA0139.1	MA0139.1	cttggcacctgggtaaccAggagcagggggcaccatg	0.77076	0.829468	10.6639	11.4561	0.000494741	8.82632e-05	1	0.792178	0.0575828	strong
chr2	231084902	231084902	1	-	rs7581442	G	A	SNV	c(-6, 7)	EGR1	jaspar2018	MA0162.2	MA0162.2	tcagcccagagagGgaggtatgggagg	0.883896	0.740706	10.4248	8.75278	8.79802e-05	0.00268145	1	-1.67202	-0.141931	strong
chr2	231084902	231084902	1	+	rs7581442	G	A	SNV	c(1, 17)	EWSR1-FLI1	jaspar2018	MA0149.1	MA0149.1	gggatcagcccagagagGgaggtatgggaggagga	0.690149	0.628072	21.3362	19.4263	4.36357e-05	0.0003705	1	-1.90988	-0.0618702	strong
chr2	231084902	231084902	1	+	rs7581442	G	A	SNV	c(-3, 17)	ZNF263	jaspar2018	MA0528.1	MA0528.1	gttgggatcagcccagagagGgaggtatgggaggaggaggc	0.862899	0.745009	9.77808	8.48909	8.39609e-07	0.000195264	1	-1.28899	-0.114301	strong
chr15	75100435	75100435	1	+	rs76317475	C	T	SNV	c(-4, 5)	Hand1::Tcf3	jaspar2018	MA0092.1	MA0092.1	tctgctgtcTggaaaagtg	0.749438	0.978124	5.8431	7.57509	0.00889301	4.00543e-05	1	1.73199	0.223749	strong
chr15	75100435	75100435	1	+	rs76317475	C	T	SNV	c(-4, 3)	Smad4	jaspar2018	MA1153.1	MA1153.1	tgctgtcTggaaaag	0.799063	0.981988	8.75118	10.7391	0.00212097	7.62939e-05	1	1.98797	0.1818	strong
chr12	68434459	68434459	1	+	rs76930710	T	C	SNV	c(-2, 11)	Stat4	jaspar2018	MA0518.1	MA0518.1	gtggacgacaggtTcagagaaagatgt	0.920013	0.833021	10.6525	9.65455	8.82186e-05	0.000906732	1	-0.997979	-0.0862546	strong
chr8	129586865	129586865	1	-	rs77495334	G	A	SNV	c(-7, 3)	Foxo1	jaspar2018	MA0480.1	MA0480.1	catgggaaacAagagcagctg	0.755693	0.925446	8.95545	10.9502	0.00337958	9.13143e-05	1	1.99477	0.168672	strong
chr2	71050178	71050178	1	-	rs78814850	C	T	SNV	c(-5, 9)	TFAP2C	jaspar2018	MA0524.1	MA0524.1	caagcaagtcgcccTgtgggtaggggatc	0.829414	0.940286	8.84461	10.005	0.00128655	5.8773e-05	1	1.1604	0.109163	strong
chr16	75252327	75252327	1	+	rs8056814	G	A	SNV	c(-4, 5)	Arntl	jaspar2018	MA0603.1	MA0603.1	aggtgggacAcgtgtcagt	0.854826	0.941176	8.62355	9.47822	0.000489235	8.01086e-05	1	0.85467	0.0849535	strong
chr16	75252327	75252327	1	+	rs8056814	G	A	SNV	c(-3, 6)	CLOCK	jaspar2018	MA0819.1	MA0819.1	aggtgggacAcgtgtcagt	0.841718	0.989534	8.95458	10.5132	0.000413895	5.72205e-06	1	1.55857	0.14671	strong
chr16	75252327	75252327	1	+	rs8056814	G	A	SNV	c(-3, 5)	Creb3l2	jaspar2018	MA0608.1	MA0608.1	ggtgggacAcgtgtcag	0.812036	0.978213	9.54004	11.4887	0.00120544	1.52588e-05	1	1.94865	0.165925	strong
chr16	75252327	75252327	1	-	rs8056814	G	A	SNV	c(-2, 10)	Hes2	jaspar2018	MA0616.1	MA0616.1	cacaggtgggacAcgtgtcagtggc	0.84507	0.991892	5.33914	6.21588	0.000741884	1.23084e-05	1	0.87674	0.139958	strong
chr16	75252327	75252327	1	-	rs8056814	G	A	SNV	c(-4, 7)	HES5	jaspar2018	MA0821.1	MA0821.1	acaggtgggacAcgtgtcagtgg	0.810613	0.921232	14.2203	16.1568	0.000179529	6.85453e-06	1	1.93652	0.110432	strong
chr16	75252327	75252327	1	+	rs8056814	G	A	SNV	c(-4, 7)	HES7	jaspar2018	MA0822.1	MA0822.1	acaggtgggacAcgtgtcagtgg	0.740836	0.843099	13.9842	15.9091	0.000465274	3.12924e-05	1	1.92493	0.102051	strong
chr16	75252327	75252327	1	+	rs8056814	G	A	SNV	c(-3, 6)	HEY1	jaspar2018	MA0823.1	MA0823.1	aggtgggacAcgtgtcagt	0.895823	0.992252	10.1106	11.1832	0.000247002	2.86102e-06	1	1.07268	0.0951847	strong
chr16	75252327	75252327	1	+	rs8056814	G	A	SNV	c(-3, 6)	HEY2	jaspar2018	MA0649.1	MA0649.1	aggtgggacAcgtgtcagt	0.867782	0.991704	9.37449	10.6913	0.000353813	1.23978e-05	1	1.3168	0.122158	strong
chr16	75252327	75252327	1	+	rs8056814	G	A	SNV	c(-4, 5)	MAX	jaspar2018	MA0058.1	MA0058.1	aggtgggacAcgtgtcagt	0.837579	0.97182	8.10078	9.37027	0.000785828	7.62939e-05	1	1.26949	0.131734	strong
chr16	75252327	75252327	1	+	rs8056814	G	A	SNV	c(-2, 5)	Mlxip	jaspar2018	MA0622.1	MA0622.1	gtgggacAcgtgtca	0.829143	0.99286	10.1022	12.0901	0.00134277	6.10352e-05	1	1.98797	0.163258	strong
chr16	75252327	75252327	1	+	rs8056814	G	A	SNV	c(-3, 6)	Npas2	jaspar2018	MA0626.1	MA0626.1	aggtgggacAcgtgtcagt	0.805189	0.992076	8.61975	10.6077	0.00271606	3.05176e-05	1	1.98797	0.18593	strong
chr16	75252327	75252327	1	+	rs8056814	G	A	SNV	c(-4, 12)	PAX9	jaspar2018	MA0781.1	MA0781.1	acagcacaggtgggacAcgtgtcagtggctttg	0.689177	0.779668	13.7477	15.5433	0.000829813	6.4159e-05	1	1.79556	0.0901607	strong
chr16	75252327	75252327	1	-	rs8056814	G	A	SNV	c(-4, 7)	PKNOX1	jaspar2018	MA0782.1	MA0782.1	acaggtgggacAcgtgtcagtgg	0.748716	0.843175	15.5393	17.4973	0.000158131	8.88109e-06	1	1.95803	0.0943714	strong
chr16	75252327	75252327	1	+	rs8056814	G	A	SNV	c(-4, 7)	PKNOX2	jaspar2018	MA0783.1	MA0783.1	acaggtgggacAcgtgtcagtgg	0.754875	0.849905	15.4344	17.3747	0.000161111	9.29832e-06	1	1.9403	0.09493	strong
chr16	75252327	75252327	1	+	rs8056814	G	A	SNV	c(-3, 6)	TFE3	jaspar2018	MA0831.1	MA0831.1	aggtgggacAcgtgtcagt	0.879336	0.963891	7.18085	7.85495	0.000963211	0.000100136	1	0.674103	0.0827848	weak
chr16	75252327	75252327	1	+	rs8056814	G	A	SNV	c(-3, 6)	TFEB	jaspar2018	MA0692.1	MA0692.1	aggtgggacAcgtgtcagt	0.810396	0.947137	8.03144	9.36377	0.0017271	7.34329e-05	1	1.33233	0.134867	strong
chr16	75252327	75252327	1	-	rs8056814	G	A	SNV	c(-4, 7)	TGIF1	jaspar2018	MA0796.1	MA0796.1	acaggtgggacAcgtgtcagtgg	0.727231	0.815498	15.8833	17.8096	0.000412524	3.96371e-05	1	1.92634	0.0882178	strong
chr16	75252327	75252327	1	+	rs8056814	G	A	SNV	c(-4, 7)	TGIF2	jaspar2018	MA0797.1	MA0797.1	acaggtgggacAcgtgtcagtgg	0.772172	0.865603	13.2525	14.8408	0.000204325	1.25766e-05	1	1.58827	0.0927431	strong
chr16	75252327	75252327	1	+	rs8056814	G	A	SNV	c(-7, 8)	USF2	jaspar2018	MA0526.2	MA0526.2	cagcacaggtgggacAcgtgtcagtggcttt	0.763897	0.905275	10.0243	11.8489	0.00155107	5.78747e-05	1	1.82466	0.139591	strong
chr22	22005879	22005879	1	-	rs12628594	A	C	SNV	c(-5, 9)	HNF4A	jaspar2018	MA0114.2	MA0114.2	tctcccacagatccCaaagaccacggggc	0.759342	0.891378	8.85973	10.3693	0.00149983	5.77979e-05	1	1.50961	0.130013	strong
chr22	22005879	22005879	1	+	rs12628594	A	C	SNV	c(-6, 8)	HNF4G	jaspar2018	MA0484.1	MA0484.1	tctcccacagatccCaaagaccacggggc	0.757899	0.893574	8.42862	9.90966	0.00193262	6.89328e-05	1	1.48104	0.133772	strong
chr4	38492167	38492167	1	-	rs73245307	G	A	SNV	c(-2, 8)	BATF::JUN	jaspar2018	MA0462.1	MA0462.1	ggaaagtttgAgtcatatctg	0.833142	0.997337	10.177	12.1756	0.00084281	4.76837e-07	1	1.99861	0.163713	strong
chr4	38492167	38492167	1	+	rs73245307	G	A	SNV	c(-4, 6)	FOS	jaspar2018	MA0476.1	MA0476.1	ggaaagtttgAgtcatatctg	0.829045	0.98804	10.4736	12.4731	0.000934362	2.36034e-05	1	1.99947	0.158393	strong
chr4	38492167	38492167	1	+	rs73245307	G	A	SNV	c(-3, 6)	FOS::JUN	jaspar2018	MA0099.3	MA0099.3	gaaagtttgAgtcatatct	0.881191	0.971573	9.21114	10.1444	0.000395775	2.00272e-05	1	0.933267	0.0894111	strong
chr4	38492167	38492167	1	+	rs73245307	G	A	SNV	c(-4, 7)	FOS::JUNB	jaspar2018	MA1134.1	MA1134.1	aggaaagtttgAgtcatatctga	0.829777	0.973375	9.83379	11.5204	0.000775874	1.75834e-05	1	1.68662	0.142534	strong
chr4	38492167	38492167	1	+	rs73245307	G	A	SNV	c(-5, 7)	FOS::JUND	jaspar2018	MA1141.1	MA1141.1	taggaaagtttgAgtcatatctgag	0.866589	0.974102	10.4941	11.7844	0.000338018	1.67489e-05	1	1.29028	0.106677	strong
chr4	38492167	38492167	1	-	rs73245307	G	A	SNV	c(-3, 6)	FOSB::JUNB	jaspar2018	MA1135.1	MA1135.1	gaaagtttgAgtcatatct	0.830205	0.974891	9.5398	11.1887	0.000991821	2.00272e-05	1	1.64888	0.143696	strong
chr4	38492167	38492167	1	-	rs73245307	G	A	SNV	c(-4, 6)	FOSL1	jaspar2018	MA0477.1	MA0477.1	ggaaagtttgAgtcatatctg	0.804761	0.958183	10.52	12.5173	0.0017128	6.77109e-05	1	1.99737	0.152918	strong
chr4	38492167	38492167	1	-	rs73245307	G	A	SNV	c(-5, 7)	FOSL1::JUN	jaspar2018	MA1128.1	MA1128.1	taggaaagtttgAgtcatatctgag	0.887144	0.977668	9.71597	10.6951	0.000250563	1.64807e-05	1	0.979178	0.0895314	strong
chr4	38492167	38492167	1	-	rs73245307	G	A	SNV	c(-5, 7)	FOSL1::JUNB	jaspar2018	MA1137.1	MA1137.1	taggaaagtttgAgtcatatctgag	0.863085	0.972351	6.51204	7.3058	0.000701636	1.63764e-05	1	0.793764	0.105741	strong
chr4	38492167	38492167	1	-	rs73245307	G	A	SNV	c(-3, 7)	FOSL2	jaspar2018	MA0478.1	MA0478.1	ggaaagtttgAgtcatatctg	0.816498	0.97506	10.3385	12.3359	0.00128531	3.0756e-05	1	1.99739	0.157896	strong
chr4	38492167	38492167	1	+	rs73245307	G	A	SNV	c(-5, 6)	FOSL2::JUN	jaspar2018	MA1130.1	MA1130.1	aggaaagtttgAgtcatatctga	0.882482	0.981176	9.64912	10.7168	0.000361681	1.62125e-05	1	1.06771	0.0977716	strong
chr4	38492167	38492167	1	-	rs73245307	G	A	SNV	c(-3, 6)	FOSL2::JUNB	jaspar2018	MA1138.1	MA1138.1	gaaagtttgAgtcatatct	0.822984	0.972861	9.72476	11.482	0.00110149	2.76566e-05	1	1.75722	0.148915	strong
chr4	38492167	38492167	1	-	rs73245307	G	A	SNV	c(-3, 6)	FOSL2::JUND	jaspar2018	MA1144.1	MA1144.1	gaaagtttgAgtcatatct	0.844999	0.974035	9.94785	11.4541	0.000627518	1.81198e-05	1	1.50629	0.128116	strong
chr4	38492167	38492167	1	-	rs73245307	G	A	SNV	c(-3, 5)	JDP2	jaspar2018	MA0655.1	MA0655.1	aaagtttgAgtcatatc	0.801114	0.935366	11.4333	13.3451	0.000629425	1.90735e-05	1	1.91183	0.134017	strong
chr4	38492167	38492167	1	-	rs73245307	G	A	SNV	c(-2, 5)	JUN::FOS	jaspar2018	MA0099.1	MA0099.1	aagtttgAgtcatat	0.838273	0.966133	6.61678	7.60631	0.00123596	7.62939e-05	1	0.989532	0.12576	strong
chr4	38492167	38492167	1	-	rs73245307	G	A	SNV	c(-3, 10)	JUN(var.2)	jaspar2018	MA0489.1	MA0489.1	ataggaaagtttgAgtcatatctgagc	0.829264	0.977977	10.3465	12.1805	0.000872374	1.97329e-05	1	1.83401	0.147285	strong
chr4	38492167	38492167	1	-	rs73245307	G	A	SNV	c(-3, 7)	JUNB	jaspar2018	MA0490.1	MA0490.1	ggaaagtttgAgtcatatctg	0.822889	0.981228	10.4311	12.4303	0.00123954	3.0756e-05	1	1.99911	0.157817	strong
chr4	38492167	38492167	1	+	rs73245307	G	A	SNV	c(-4, 6)	JUND	jaspar2018	MA0491.1	MA0491.1	ggaaagtttgAgtcatatctg	0.813644	0.961826	11.0045	13.0041	0.00095439	3.43323e-05	1	1.99959	0.147907	strong
chr4	38492167	38492167	1	-	rs73245307	G	A	SNV	c(-4, 6)	NFE2	jaspar2018	MA0841.1	MA0841.1	ggaaagtttgAgtcatatctg	0.777508	0.901833	12.4096	14.3903	0.00067997	2.95639e-05	1	1.98067	0.124147	strong
chr4	38492167	38492167	1	-	rs73245307	G	A	SNV	c(-14, 4)	Nr1h3::Rxra	jaspar2018	MA0494.1	MA0494.1	gacaaataggaaagtttgGgtcatatctgagctgtag	0.855753	0.765545	9.00739	8.07682	3.65671e-05	0.000601705	1	-0.930568	-0.0886643	strong
chr6	32632957	32632957	1	+	rs9274418	C	G	SNV	c(-8, 5)	EGR1	jaspar2018	MA0162.2	MA0162.2	tccagttcccgccCgcccgtgcctggc	0.897109	0.817813	10.5791	9.65316	5.27911e-05	0.000521567	1	-0.925943	-0.0785993	strong
chr6	32632957	32632957	1	+	rs9274418	C	G	SNV	c(-7, 8)	EGR4	jaspar2018	MA0733.1	MA0733.1	cctccagttcccgccCgcccgtgcctggcgc	0.858993	0.724413	10.0886	8.56046	6.68112e-05	0.00185245	1	-1.52817	-0.130727	strong
chr6	32632957	32632957	1	+	rs9274418	C	G	SNV	c(-1, 10)	HES5	jaspar2018	MA0821.1	MA0821.1	cagttcccgccGgcccgtgcctg	0.787103	0.884126	13.8087	15.5072	0.000318408	2.28882e-05	1	1.69851	0.0968597	strong
chr6	32632957	32632957	1	+	rs9274418	C	G	SNV	c(-1, 10)	HES7	jaspar2018	MA0822.1	MA0822.1	cagttcccgccGgcccgtgcctg	0.790989	0.883466	14.9282	16.6689	0.000210881	1.7643e-05	1	1.74072	0.092285	strong
chr6	32632957	32632957	1	+	rs9274418	C	G	SNV	c(-8, 6)	SP2	jaspar2018	MA0516.1	MA0516.1	ctccagttcccgccCgcccgtgcctggcg	0.917507	0.856089	10.6437	9.94193	4.42164e-05	0.000377822	1	-0.701803	-0.0605714	strong
chr19	1189482	1189482	1	+	rs9304882	T	G	SNV	c(-7, 3)	SIX1	jaspar2018	MA1118.1	MA1118.1	ggaggaacttGagccctggac	0.777006	0.910468	8.16526	9.52825	0.00134158	7.62939e-05	1	1.36299	0.130522	strong
chr19	1189482	1189482	1	+	rs9304882	T	G	SNV	c(-11, 4)	SIX2	jaspar2018	MA1119.1	MA1119.1	ggcatggaggaacttGagccctggaccagaa	0.742764	0.847866	8.32114	9.44437	0.00125879	8.86663e-05	1	1.12324	0.101465	strong
chr19	1189482	1189482	1	-	rs9304882	T	G	SNV	c(-16, 3)	TP63	jaspar2018	MA0525.1	MA0525.1	ggacggcatggaggaacttGagccctggaccagaaactt	0.783378	0.931348	8.66103	10.2406	0.00272907	8.79033e-06	1	1.57954	0.143942	strong
chr19	1189482	1189482	1	-	rs9304882	T	G	SNV	c(-15, 2)	TP73	jaspar2018	MA0861.1	MA0861.1	acggcatggaggaacttGagccctggaccagaaac	0.697244	0.835894	10.2395	12.2386	0.00315362	0.000101203	1	1.99908	0.136879	strong
chr13	42903018	42903018	1	+	rs9590686	A	G	SNV	c(-6, 4)	RUNX1	jaspar2018	MA0002.2	MA0002.2	tgtaacttgtGgttggataca	0.752916	0.97142	6.79847	8.72386	0.00652122	3.14713e-05	1	1.92538	0.214511	strong
chr13	42903018	42903018	1	+	rs9590686	A	G	SNV	c(-6, 4)	RUNX1	jaspar2018	MA0002.1	MA0002.1	tgtaacttgtGgttggataca	0.768853	0.96872	6.73552	8.44271	0.00514817	2.52724e-05	1	1.70719	0.196006	strong
chr13	42903018	42903018	1	-	rs9590686	A	G	SNV	c(-4, 4)	RUNX2	jaspar2018	MA0511.2	MA0511.2	taacttgtGgttggata	0.753162	0.947867	7.87435	9.87274	0.00541687	8.39233e-05	1	1.99839	0.192009	strong
chr13	42903018	42903018	1	+	rs9590686	A	G	SNV	c(-9, 5)	RUNX2	jaspar2018	MA0511.1	MA0511.1	cttttgtaacttgtGgttggatacaaatc	0.777628	0.952576	9.03512	11.0237	0.00235038	4.16124e-05	1	1.98861	0.171983	strong
chr13	42903018	42903018	1	-	rs9590686	A	G	SNV	c(-5, 4)	RUNX3	jaspar2018	MA0684.1	MA0684.1	gtaacttgtGgttggatac	0.760421	0.954873	7.84611	9.81096	0.00460434	4.48227e-05	1	1.96485	0.191376	strong
chr6	138132516	138132516	1	+	rs10499197	T	G	SNV	c(1, 11)	SRF	jaspar2018	MA0083.1	MA0083.1	acttacttagcGtccaaatatgg	0.831987	0.887741	12.5954	13.4297	5.36442e-05	8.04663e-06	1	0.834275	0.0552152	strong
chr15	75111152	75111152	1	+	rs74025850	G	A	SNV	c(-11, 3)	NR2C2	jaspar2018	MA0504.1	MA0504.1	tactgggggcagagGctgcgcgtgagtca	0.804595	0.722443	10.356	9.30801	0.000100168	0.00101894	1	-1.048	-0.0815643	strong
chr19	6668972	6668972	1	-	rs1077667	C	T	SNV	c(-3, 9)	POU2F2	jaspar2018	MA0507.1	MA0507.1	catgtgggtacaTgcacatacgtcc	0.762136	0.896293	10.6846	12.5543	0.00146607	8.75592e-05	1	1.86967	0.133552	strong
chr19	6668972	6668972	1	+	rs1077667	C	T	SNV	c(-17, 2)	TP53	jaspar2018	MA0106.1	MA0106.1	gtgtggacatgtgggtacaTgcacatacgtccacatggg	0.691584	0.748832	13.0337	14.0761	0.000219822	2.99958e-05	1	1.04247	0.0558973	strong
chr19	6668972	6668972	1	-	rs1077667	C	T	SNV	c(-12, 2)	TP53	jaspar2018	MA0106.2	MA0106.2	gacatgtgggtacaTgcacatacgtccac	0.85561	0.910266	12.0559	12.8133	2.15732e-05	1.46683e-06	1	0.757377	0.0538799	strong
chr19	6668972	6668972	1	-	rs1077667	C	T	SNV	c(-14, 3)	TP53	jaspar2018	MA0106.3	MA0106.3	gtggacatgtgggtacaTgcacatacgtccacatg	0.787822	0.851014	13.8276	14.9186	5.62834e-05	5.1794e-06	1	1.09102	0.0623768	strong
chr19	6668972	6668972	1	+	rs1077667	C	T	SNV	c(-14, 3)	TP63	jaspar2018	MA0525.2	MA0525.2	gtggacatgtgggtacaTgcacatacgtccacatg	0.83435	0.868059	18.105	18.8342	4.66657e-06	1.09496e-06	1	0.729116	0.0336184	strong
chr8	81289787	81289787	1	-	rs10957979	A	G	SNV	c(-4, 8)	ASCL1	jaspar2018	MA1100.1	MA1100.1	tgaaactcttacAtctgctcactca	0.880512	0.737089	10.6268	8.92131	9.62168e-05	0.00244211	1	-1.70548	-0.141561	strong
chr8	81289787	81289787	1	-	rs10957979	A	G	SNV	c(-4, 8)	TWIST1	jaspar2018	MA1123.1	MA1123.1	tgaaactcttacAtctgctcactca	0.949188	0.787986	9.87696	8.22867	8.79616e-05	0.00222604	1	-1.64829	-0.158542	strong
chr8	81289787	81289787	1	-	rs10957979	A	G	SNV	c(-4, 8)	ZBTB18	jaspar2018	MA0698.1	MA0698.1	tgaaactcttacAtctgctcactca	0.898369	0.762815	12.6842	10.7865	6.13034e-05	0.00138226	1	-1.89777	-0.134526	strong
chr10	112186148	112186148	1	-	rs11195128	C	T	SNV	c(-12, 3)	SOX8	jaspar2018	MA0868.1	MA0868.1	gtcaacacagaatagTgatataatcaaaatt	0.701566	0.770555	19.6309	21.5549	0.000204985	2.3454e-05	1	1.92399	0.0688278	strong
chr4	38665142	38665142	1	-	rs112691446	G	A	SNV	c(-4, 6)	SP1	jaspar2018	MA0079.3	MA0079.3	ctcagccgagGaggggccgcg	0.915574	0.747778	10.6876	8.73917	9.13143e-05	0.00391459	1	-1.94846	-0.166992	strong
chr5	35908610	35908610	1	-	rs115727000	G	A	SNV	c(-1, 9)	Gfi1b	jaspar2018	MA0483.1	MA0483.1	gaaaagggtaGctgaggtttc	0.920573	0.874765	10.6603	10.1342	4.52995e-05	0.000226259	1	-0.526164	-0.0454662	weak
chr5	35908610	35908610	1	+	rs115727000	G	A	SNV	c(-10, 3)	SPI1	jaspar2018	MA0080.4	MA0080.4	agagaaaagggtaActgaggtttcccc	0.686565	0.784027	14.0166	15.9954	0.00111333	9.98005e-05	1	1.97878	0.0970927	strong
chr7	98739732	98739732	1	+	rs116469582	C	T	SNV	c(-4, 8)	TFAP2A(var.3)	jaspar2018	MA0872.1	MA0872.1	acctctggagccCggggggaaacag	0.902785	0.845013	11.1466	10.4452	9.36538e-05	0.000405207	1	-0.701474	-0.0569053	strong
chr7	98739732	98739732	1	-	rs116469582	C	T	SNV	c(-4, 8)	TFAP2B(var.3)	jaspar2018	MA0813.1	MA0813.1	acctctggagccCggggggaaacag	0.902676	0.870259	11.3082	10.9062	8.53539e-05	0.000220016	1	-0.402037	-0.0321237	weak
chr7	98739732	98739732	1	-	rs116469582	C	T	SNV	c(-5, 9)	TFAP2C	jaspar2018	MA0524.1	MA0524.1	gaacctctggagccTggggggaaacaggt	0.854163	0.954003	9.10363	10.1486	0.000752473	2.91346e-05	1	1.04494	0.0983014	strong
chr7	98739732	98739732	1	-	rs116469582	C	T	SNV	c(-4, 8)	TFAP2C(var.3)	jaspar2018	MA0815.1	MA0815.1	acctctggagccCggggggaaacag	0.900575	0.837492	11.4421	10.6489	8.59946e-05	0.000386089	1	-0.793188	-0.0624938	strong
chr7	98739732	98739732	1	-	rs116469582	C	T	SNV	c(-6, 10)	ZNF282	jaspar2018	MA1154.1	MA1154.1	cagaacctctggagccTggggggaaacaggttg	0.683351	0.787224	12.6829	14.586	0.00140349	9.0251e-05	1	1.90302	0.102954	strong
chr16	68574064	68574064	1	+	rs1170442	G	T	SNV	c(-14, 3)	RARA::RXRG	jaspar2018	MA1149.1	MA1149.1	agtggggtcacaggatgGaacactgtagaggagga	0.860579	0.785284	9.14514	8.36688	7.22796e-05	0.000601251	1	-0.778259	-0.0735162	strong
chr5	96271942	96271942	1	-	rs117273653	G	A	SNV	c(-3, 11)	CENPB	jaspar2018	MA0637.1	MA0637.1	ggtcgtgggcagtcGtgacacgcggggtc	0.8901	0.768658	10.7824	9.33066	3.28803e-05	0.000888556	1	-1.4517	-0.120014	strong
chr8	129611136	129611136	1	-	rs11780050	T	A	SNV	c(-6, 6)	Lhx3	jaspar2018	MA0135.1	MA0135.1	tgtacagggaaaTtaatgttgtttt	0.874886	0.736771	10.5705	8.93135	5.73844e-05	0.00187376	1	-1.63915	-0.135969	strong
chr19	1082265	1082265	1	-	rs11879091	C	T	SNV	c(-10, 4)	SCRT1	jaspar2018	MA0743.1	MA0743.1	agaggcacacctgaTgctgtgcgggggcg	0.766178	0.862492	12.5127	14.0685	0.000582354	5.23031e-05	1	1.55577	0.0955063	strong
chr19	1082265	1082265	1	-	rs11879091	C	T	SNV	c(-8, 4)	SCRT2	jaspar2018	MA0744.1	MA0744.1	aggcacacctgaTgctgtgcggggg	0.75629	0.866437	12.6197	14.4431	0.000717506	4.59254e-05	1	1.82337	0.109485	strong
chr19	1021620	1021620	1	-	rs74806805	A	C	SNV	c(-3, 11)	MEF2A	jaspar2018	MA0052.2	MA0052.2	tcgtgaagcgttccCtatttttgctgtag	0.824637	0.886229	10.6016	11.3828	0.000256145	4.31761e-05	1	0.781203	0.0609088	strong
chr19	1021620	1021620	1	-	rs74806805	A	C	SNV	c(-2, 12)	MEF2C	jaspar2018	MA0497.1	MA0497.1	tcgtgaagcgttccCtatttttgctgtag	0.874835	0.935013	10.3296	11.0301	0.000144213	1.48341e-05	1	0.700479	0.0594304	strong
chr7	50237392	50237392	1	+	rs12155385	C	T	SNV	c(-12, 2)	Bach1::Mafk	jaspar2018	MA0591.1	MA0591.1	gcactctgactcagCggcctgcccgctgc	0.912711	0.792697	14.7358	12.8196	4.67524e-06	0.000193571	1	-1.91613	-0.118797	strong
chr7	50237392	50237392	1	+	rs12155385	C	T	SNV	c(-10, 3)	BACH2	jaspar2018	MA1101.1	MA1101.1	cactctgactcagCggcctgcccgctg	0.963161	0.875303	12.6343	11.506	2.58908e-06	4.34443e-05	1	-1.12834	-0.0860836	strong
chr7	50237392	50237392	1	+	rs12155385	C	T	SNV	c(-9, 5)	MAF::NFE2	jaspar2018	MA0501.1	MA0501.1	gcactctgactcagCggcctgcccgctgc	0.883292	0.770981	13.9593	12.2046	1.15875e-05	0.00033896	1	-1.7547	-0.111178	strong
chr7	50237392	50237392	1	-	rs12155385	C	T	SNV	c(-15, 5)	MAFF	jaspar2018	MA0495.2	MA0495.2	agggccgcactctgactcagCggcctgcccgctgcaggcac	0.776596	0.695751	10.3369	9.32615	5.87265e-05	0.000629419	1	-1.0107	-0.0769779	strong
chr7	50237392	50237392	1	-	rs12155385	C	T	SNV	c(-14, 4)	MAFK	jaspar2018	MA0496.2	MA0496.2	ggccgcactctgactcagCggcctgcccgctgcaggc	0.778322	0.69387	10.7724	9.65645	6.10186e-05	0.000709463	1	-1.11596	-0.0814468	strong
chr7	50237392	50237392	1	+	rs12155385	C	T	SNV	c(-13, 1)	Nfe2l2	jaspar2018	MA0150.2	MA0150.2	gcactctgactcagCggcctgcccgctgc	0.888491	0.768652	12.465	10.8202	1.96258e-05	0.000612337	1	-1.64481	-0.117524	strong
chr7	50237392	50237392	1	+	rs12155385	C	T	SNV	c(-9, 1)	NFE2L2	jaspar2018	MA0150.1	MA0150.1	tctgactcagCggcctgcccg	0.930992	0.776904	10.1205	8.4814	3.50475e-05	0.00152731	1	-1.63915	-0.151009	strong
chr5	96212895	96212895	1	+	rs1230360	T	C	SNV	c(-17, 2)	ESR1	jaspar2018	MA0112.2	MA0112.2	accatgttggtgaggctggCctcgaattcctgacctcag	0.69129	0.807218	7.39631	8.54973	0.00187831	8.65626e-05	1	1.15342	0.110188	strong
chr5	96212895	96212895	1	-	rs1230360	T	C	SNV	c(-15, 4)	PPARG	jaspar2018	MA0066.1	MA0066.1	accatgttggtgaggctggCctcgaattcctgacctcag	0.686502	0.770134	10.3524	11.5763	0.000733463	5.57379e-05	1	1.22391	0.0819201	strong
chr20	44761485	44761485	1	+	rs12480534	T	G	SNV	c(-6, 5)	E2F1	jaspar2018	MA0024.3	MA0024.3	gcggcttgggcGccctgagtaaa	0.748502	0.923392	8.55158	10.5136	0.00322115	6.20484e-05	1	1.96205	0.172517	strong
chr10	75570868	75570868	1	+	rs12775558	G	A	SNV	c(-6, 7)	CTCFL	jaspar2018	MA1102.1	MA1102.1	tgcgggcgccgagGgggcccggggctg	0.884808	0.784864	11.2783	10.0392	4.42043e-05	0.000651956	1	-1.23908	-0.097516	strong
chr10	75570868	75570868	1	+	rs12775558	G	A	SNV	c(-10, 3)	PLAG1	jaspar2018	MA0163.1	MA0163.1	tgcgggcgccgagGgggcccggggctg	0.825877	0.734447	11.6856	10.418	4.16376e-05	0.000584498	1	-1.26765	-0.0899055	strong
chr19	1132969	1132969	1	+	rs12971921	G	T	SNV	c(-5, 6)	HINFP	jaspar2018	MA0131.2	MA0131.2	ggcaaccccggTccgcgagcccg	0.743613	0.915766	8.65123	10.6316	0.00353384	7.71284e-05	1	1.98035	0.170712	strong
chr6	41999358	41999358	1	+	rs13211412	A	T	SNV	c(-5, 5)	HOXC13	jaspar2018	MA0907.1	MA0907.1	aaagcactagTaaaacaaaac	0.757044	0.907077	9.93192	11.8805	0.0015924	3.79086e-05	1	1.94855	0.148888	strong
chr5	35904889	35904889	1	-	rs1345827	C	A	SNV	c(-4, 5)	Sox3	jaspar2018	MA0514.1	MA0514.1	gatctaaaaCaaaagaaca	0.947247	0.819632	10.7028	9.26332	3.71933e-05	0.00120258	1	-1.43952	-0.127414	strong
chr5	35904889	35904889	1	+	rs1345827	C	A	SNV	c(-7, 4)	ZNF384	jaspar2018	MA1125.1	MA1125.1	ctgatctaaaaAaaaagaacaag	0.842281	0.999792	10.4795	12.4097	0.000278354	2.38419e-07	1	1.93017	0.155506	strong
chr2	182190965	182190965	1	+	rs1440046	A	G	SNV	c(-10, 4)	PRDM1	jaspar2018	MA0508.1	MA0508.1	atttctaaagtgagAgttttggcactctt	0.878633	0.742609	11.6232	9.8624	3.35239e-05	0.00119109	1	-1.76084	-0.133454	strong
chr15	75063863	75063863	1	+	rs149746517	C	T	SNV	c(-5, 12)	ESR2	jaspar2018	MA0258.1	MA0258.1	gggtttcaccacgttggTcaggctggtcttaaact	0.811363	0.886902	8.75785	9.55077	0.000250721	1.74428e-05	1	0.792923	0.073843	strong
chr15	75063863	75063863	1	+	rs149746517	C	T	SNV	c(-3, 11)	ESR2	jaspar2018	MA0258.2	MA0258.2	tttcaccacgttggTcaggctggtcttaa	0.780523	0.879413	8.57657	9.63947	0.000989786	6.57057e-05	1	1.0629	0.0971967	strong
chr15	75063863	75063863	1	+	rs149746517	C	T	SNV	c(-10, 3)	RORA(var.2)	jaspar2018	MA0072.1	MA0072.1	ttcaccacgttggTcaggctggtctta	0.743163	0.868427	10.6865	12.4621	0.00150699	7.54781e-05	1	1.77559	0.123932	strong
chr1	25251923	25251923	1	+	rs760805	A	T	SNV	c(-5, 5)	DMRT3	jaspar2018	MA0610.1	MA0610.1	tctaacatgtAtccagctctc	0.976694	0.778651	9.97522	7.98725	4.31538e-05	0.0044241	1	-1.98798	-0.194724	strong
chr13	99966605	99966605	1	+	rs16956449	A	G	SNV	c(-3, 7)	DMRT3	jaspar2018	MA0610.1	MA0610.1	ttcatgatctGtatcaaatgt	0.784834	0.982877	8.04932	10.0373	0.0042038	2.47955e-05	1	1.98798	0.194724	strong
chr16	68564186	68564186	1	-	rs1728769	C	T	SNV	c(-8, 2)	E2F6	jaspar2018	MA0471.1	MA0471.1	ccgcttccctCccggcacccc	0.962891	0.795487	11.5149	9.51968	2.90871e-05	0.00153542	1	-1.99523	-0.166865	strong
chr16	68564186	68564186	1	-	rs1728769	C	T	SNV	c(-4, 5)	ELK1	jaspar2018	MA0028.2	MA0028.2	cgcttccctTccggcaccc	0.756882	0.900189	10.2044	12.1211	0.00154018	4.76837e-05	1	1.91665	0.142438	strong
chr16	68564186	68564186	1	-	rs1728769	C	T	SNV	c(-4, 5)	ELK3	jaspar2018	MA0759.1	MA0759.1	cgcttccctTccggcaccc	0.743963	0.929699	7.88636	9.8211	0.00413513	6.96182e-05	1	1.93474	0.183329	strong
chr16	68564186	68564186	1	+	rs1728769	C	T	SNV	c(-5, 5)	ELK4	jaspar2018	MA0076.2	MA0076.2	ccgcttccctTccggcacccc	0.798912	0.969164	9.43282	11.4234	0.00187206	2.95639e-05	1	1.99053	0.16892	strong
chr16	68564186	68564186	1	-	rs1728769	C	T	SNV	c(-4, 5)	ETS1	jaspar2018	MA0098.3	MA0098.3	cgcttccctTccggcaccc	0.724562	0.914659	7.64846	9.62889	0.00676155	9.34601e-05	1	1.98043	0.188291	strong
chr16	68564186	68564186	1	-	rs1728769	C	T	SNV	c(-4, 5)	ETV1	jaspar2018	MA0761.1	MA0761.1	cgcttccctTccggcaccc	0.753947	0.945743	7.09171	8.86102	0.00555992	5.72205e-05	1	1.76931	0.188998	strong
chr16	68564186	68564186	1	-	rs1728769	C	T	SNV	c(-4, 5)	ETV4	jaspar2018	MA0764.1	MA0764.1	cgcttccctTccggcaccc	0.769188	0.953943	7.13312	8.81739	0.005373	6.10352e-05	1	1.68427	0.182335	strong
chr16	68564186	68564186	1	-	rs1728769	C	T	SNV	c(-4, 5)	ETV5	jaspar2018	MA0765.1	MA0765.1	cgcttccctTccggcaccc	0.802628	0.971848	6.63463	8.0045	0.00463772	9.44138e-05	1	1.36986	0.166399	strong
chr16	68564186	68564186	1	-	rs1728769	C	T	SNV	c(-4, 5)	FEV	jaspar2018	MA0156.2	MA0156.2	cgcttccctTccggcaccc	0.735846	0.922335	7.64454	9.55576	0.00576591	8.29697e-05	1	1.91122	0.184629	strong
chr16	68564186	68564186	1	-	rs1728769	C	T	SNV	c(-6, 4)	Gabpa	jaspar2018	MA0062.2	MA0062.2	ccgcttccctTccggcacccc	0.800132	0.962781	9.73925	11.7001	0.00129437	2.36034e-05	1	1.96085	0.161403	strong
chr16	68564186	68564186	1	-	rs1728769	C	T	SNV	c(-4, 5)	GABPA	jaspar2018	MA0062.1	MA0062.1	cgcttccctTccggcaccc	0.824762	0.957609	6.8213	7.86844	0.000741005	2.28882e-05	1	1.04714	0.12766	strong
chr16	68564186	68564186	1	+	rs1728769	C	T	SNV	c(-3, 16)	RREB1	jaspar2018	MA0073.1	MA0073.1	actagcctgccgcttccctCccggcacccccgccgccag	0.794026	0.680262	10.3992	8.96585	5.35492e-05	0.001744	1	-1.43335	-0.110305	strong
chr16	68564186	68564186	1	-	rs1728769	C	T	SNV	c(-6, 6)	ZBTB7A	jaspar2018	MA0750.2	MA0750.2	tgccgcttccctTccggcacccccg	0.823712	0.975588	8.32924	9.82023	0.000758454	1.2964e-05	1	1.49099	0.148211	strong
chr18	67532292	67532292	1	-	rs1788105	A	G	SNV	c(-7, 3)	CEBPB	jaspar2018	MA0466.1	MA0466.1	gcagtggcgcAatctaggctc	0.914943	0.744405	10.7968	8.79701	8.4877e-05	0.00428724	1	-1.99983	-0.169559	strong
chr5	35904614	35904614	1	-	rs1833907	G	T	SNV	c(-4, 10)	TP53	jaspar2018	MA0106.2	MA0106.2	tttggagccacatgTctgtcccagggcct	0.765957	0.815462	10.8136	11.4996	0.000452772	9.94084e-05	1	0.686004	0.0488025	weak
chr10	112116175	112116175	1	+	rs186614976	C	T	SNV	c(-4, 3)	Smad4	jaspar2018	MA1153.1	MA1153.1	cactgtcTggacctg	0.799063	0.981988	8.75118	10.7391	0.00212097	7.62939e-05	1	1.98797	0.1818	strong
chr10	64287434	64287434	1	-	rs1914196	T	C	SNV	c(-3, 8)	NHLH1	jaspar2018	MA0048.1	MA0048.1	tactagcctttCagctgagaaag	0.745375	0.889735	8.90117	10.5972	0.00249338	9.65595e-05	1	1.69602	0.142611	strong
chr1	2479983	2479983	1	-	rs1974044	A	G	SNV	c(-13, -1)	NFIC::TLX1	jaspar2018	MA0119.1	MA0119.1	ctggccgggtgcgAtggatcacgcctg	0.826584	0.720236	12.5263	10.9553	5.37038e-05	0.000785142	1	-1.57102	-0.104123	strong
chr12	6562285	6562285	1	-	rs2041384	C	T	SNV	c(-2, 10)	ELF1	jaspar2018	MA0473.1	MA0473.1	ggtcctagactgCttcctggcgaag	0.920413	0.812579	11.2042	9.90807	7.8395e-05	0.00104041	1	-1.29612	-0.106582	strong
chr12	6562285	6562285	1	-	rs2041384	C	T	SNV	c(-3, 7)	Erg	jaspar2018	MA0474.1	MA0474.1	tcctagactgCttcctggcga	0.956905	0.88984	11.3558	10.5663	5.34058e-05	0.000322342	1	-0.789497	-0.0665504	strong
chr12	6562285	6562285	1	+	rs2041384	C	T	SNV	c(-4, 10)	Ets1	jaspar2018	MA0098.2	MA0098.2	gtggtcctagactgCttcctggcgaagga	0.93266	0.864799	10.9277	10.1452	2.88626e-05	0.000257568	1	-0.782492	-0.0668555	strong
chr12	6562285	6562285	1	-	rs2041384	C	T	SNV	c(-3, 7)	FLI1	jaspar2018	MA0475.1	MA0475.1	tcctagactgCttcctggcga	0.948211	0.870031	10.878	9.98979	3.05176e-05	0.00039959	1	-0.888169	-0.077459	strong
chr5	35828362	35828362	1	-	rs77173787	A	G	SNV	c(-1, 9)	NFKB1	jaspar2018	MA0105.3	MA0105.3	gttccctgtcGgaaaaaccct	0.833982	0.951992	10.3347	11.7861	0.000482798	4.57764e-05	1	1.45141	0.117271	strong
chr5	35828362	35828362	1	-	rs77173787	A	G	SNV	c(1, 9)	REL	jaspar2018	MA0101.1	MA0101.1	ttccctgtcGgaaaaaccc	0.848414	0.97984	6.25937	7.20096	0.000492096	2.00272e-05	1	0.941593	0.128188	strong
chr5	35828362	35828362	1	-	rs77173787	A	G	SNV	c(1, 9)	RELA	jaspar2018	MA0107.1	MA0107.1	ttccctgtcGgaaaaaccc	0.791291	0.939359	8.77756	10.3858	0.00108528	3.52859e-05	1	1.60822	0.145614	strong
chr19	1095581	1095581	1	-	rs2074447	A	G	SNV	c(-7, 13)	IRF3	jaspar2018	MA1418.1	MA1418.1	cacagcctctcgggagttgtGgtttccgttcaactcccacc	0.774614	0.79937	16.6853	17.2111	4.52241e-05	1.96123e-05	1	0.525779	0.0244865	weak
chr19	1095581	1095581	1	-	rs2074447	A	G	SNV	c(-6, 7)	IRF5	jaspar2018	MA1420.1	MA1420.1	tctcgggagttgtGgtttccgttcaac	0.750417	0.820233	9.73566	10.6161	0.000565022	7.89352e-05	1	0.880441	0.0683405	strong
chr19	1095581	1095581	1	-	rs2074447	A	G	SNV	c(-6, 8)	IRF9	jaspar2018	MA0653.1	MA0653.1	ctctcgggagttgtGgtttccgttcaact	0.725486	0.758119	17.144	17.9123	0.000172977	6.62599e-05	1	0.76824	0.0325436	strong
chr19	1095581	1095581	1	+	rs2074447	A	G	SNV	c(-6, 4)	RUNX1	jaspar2018	MA0002.1	MA0002.1	cgggagttgtGgtttccgttc	0.770378	0.970245	6.74855	8.45574	0.00498676	2.19345e-05	1	1.70719	0.196006	strong
chr19	1095581	1095581	1	+	rs2074447	A	G	SNV	c(-6, 4)	RUNX1	jaspar2018	MA0002.2	MA0002.2	cgggagttgtGgtttccgttc	0.766647	0.985151	6.91946	8.84485	0.00507402	1.07288e-05	1	1.92538	0.214511	strong
chr19	1095581	1095581	1	-	rs2074447	A	G	SNV	c(-4, 4)	RUNX2	jaspar2018	MA0511.2	MA0511.2	ggagttgtGgtttccgt	0.766105	0.96081	8.00719	10.0056	0.0043335	5.34058e-05	1	1.99839	0.192009	strong
chr19	1095581	1095581	1	+	rs2074447	A	G	SNV	c(-9, 5)	RUNX2	jaspar2018	MA0511.1	MA0511.1	ctctcgggagttgtGgtttccgttcaact	0.807443	0.98239	9.37401	11.3626	0.0011647	1.88593e-06	1	1.98861	0.171983	strong
chr19	1095581	1095581	1	-	rs2074447	A	G	SNV	c(-5, 4)	RUNX3	jaspar2018	MA0684.1	MA0684.1	gggagttgtGgtttccgtt	0.775009	0.969461	7.99352	9.95836	0.00330067	1.62125e-05	1	1.96485	0.191376	strong
chr20	62368804	62368804	1	+	rs2236510	C	T	SNV	c(-8, 4)	ASCL1	jaspar2018	MA1100.1	MA1100.1	gagccccgcagcTgcgggaggtgca	0.833441	0.973319	10.0671	11.7304	0.000797212	3.02792e-05	1	1.66333	0.138063	strong
chr20	62368804	62368804	1	+	rs2236510	C	T	SNV	c(-6, 3)	Ascl2	jaspar2018	MA0816.1	MA0816.1	ccccgcagcTgcgggaggt	0.808271	0.951527	9.25111	10.8705	0.00120544	4.29153e-05	1	1.61938	0.141821	strong
chr20	62368804	62368804	1	-	rs2236510	C	T	SNV	c(-9, 3)	Myod1	jaspar2018	MA0499.1	MA0499.1	gagccccgcagcTgcgggaggtgca	0.794432	0.95864	9.39439	11.3241	0.00236526	9.83775e-05	1	1.92966	0.163391	strong
chr20	62368804	62368804	1	-	rs2236510	C	T	SNV	c(-7, 3)	Myog	jaspar2018	MA0500.1	MA0500.1	gccccgcagcTgcgggaggtg	0.803549	0.970062	9.68517	11.6844	0.00235343	9.17912e-05	1	1.99921	0.165995	strong
chr20	62368804	62368804	1	+	rs2236510	C	T	SNV	c(-6, 3)	NHLH1	jaspar2018	MA0048.2	MA0048.2	ccccgcagcTgcgggaggt	0.836326	1	10.0664	12.0146	0.000576019	0	1	1.94825	0.162156	strong
chr20	62368804	62368804	1	+	rs2236510	C	T	SNV	c(-7, 4)	NHLH1	jaspar2018	MA0048.1	MA0048.1	agccccgcagcTgcgggaggtgc	0.868248	0.998176	10.3447	11.8712	0.000159323	5.36442e-07	1	1.52645	0.128353	strong
chr20	62368804	62368804	1	-	rs2236510	C	T	SNV	c(-7, 3)	Tcf12	jaspar2018	MA0521.1	MA0521.1	gccccgcagcTgcgggaggtg	0.785709	0.950594	9.5632	11.5621	0.00236177	9.20296e-05	1	1.99885	0.164366	strong
chr20	62368804	62368804	1	-	rs2236510	C	T	SNV	c(-7, 3)	Tcf3	jaspar2018	MA0522.1	MA0522.1	gccccgcagcTgcgggaggtg	0.801656	0.973895	9.36292	11.362	0.00174189	4.72069e-05	1	1.99912	0.171377	strong
chr15	75092384	75092384	1	+	rs2301249	T	C	SNV	c(-4, 6)	Gata1	jaspar2018	MA0035.3	MA0035.3	tattcactctTatctccctcc	0.987644	0.827144	12.3919	10.3928	1.0252e-05	0.000752926	1	-1.99915	-0.159348	strong
chr15	75092384	75092384	1	-	rs2301249	T	C	SNV	c(-4, 6)	Gata1	jaspar2018	MA0035.2	MA0035.2	tattcactctTatctccctcc	0.997092	0.816403	9.75129	8.00122	7.62939e-06	0.00224495	1	-1.75006	-0.178953	strong
chr15	75092384	75092384	1	+	rs2301249	T	C	SNV	c(-7, 6)	GATA2	jaspar2018	MA0036.2	MA0036.2	ctgtattcactctTatctccctcccct	0.982166	0.821174	11.5937	9.70997	5.80028e-06	0.0011089	1	-1.88375	-0.159607	strong
chr15	75092384	75092384	1	+	rs2301249	T	C	SNV	c(-4, 6)	GATA2	jaspar2018	MA0036.3	MA0036.3	tattcactctTatctccctcc	0.999296	0.826504	10.0062	8.30088	8.58307e-06	0.00136495	1	-1.70533	-0.170309	strong
chr15	75092384	75092384	1	-	rs2301249	T	C	SNV	c(-3, 4)	GATA3	jaspar2018	MA0037.2	MA0037.2	tcactctTatctccc	1	0.848706	13.2005	11.2034	0	0.000244141	1	-1.99704	-0.151285	strong
chr15	75092384	75092384	1	-	rs2301249	T	C	SNV	c(-3, 4)	GATA3	jaspar2018	MA0037.3	MA0037.3	tcactctTatctccc	1	0.838983	8.92321	7.49699	0	0.00402832	1	-1.42621	-0.159832	strong
chr15	75092384	75092384	1	+	rs2301249	T	C	SNV	c(-3, 7)	Gata4	jaspar2018	MA0482.1	MA0482.1	tattcactctTatctccctcc	1	0.833455	12.0047	10.0095	0	0.000910521	1	-1.99521	-0.166202	strong
chr15	75092384	75092384	1	-	rs2301249	T	C	SNV	c(-5, 7)	GATA6	jaspar2018	MA1104.1	MA1104.1	tgtattcactctTatctccctcccc	0.99847	0.86005	10.8666	9.38081	7.89762e-06	0.000415087	1	-1.48583	-0.136527	strong
chr15	75092384	75092384	1	-	rs2301249	T	C	SNV	c(-2, 15)	Tal1::Gata1	jaspar2018	MA0140.1	MA0140.1	ccctctgtattcactctTatctccctcccctactg	0.952626	0.792521	9.26077	7.73964	6.96967e-05	0.00329451	1	-1.52113	-0.156642	strong
chr8	81290387	81290387	1	-	rs2370615	C	T	SNV	c(-2, 7)	BARHL2	jaspar2018	MA0635.1	MA0635.1	ccatatagtCgtttattca	0.988294	0.874421	7.0699	6.26306	8.39233e-05	0.00234032	1	-0.806837	-0.1128	strong
chr8	81290387	81290387	1	-	rs2370615	C	T	SNV	c(-2, 9)	FOXC2	jaspar2018	MA0846.1	MA0846.1	taccatatagtTgtttattcacc	0.732791	0.915669	6.90046	8.57816	0.00650275	6.31213e-05	1	1.6777	0.179399	strong
chr8	81290387	81290387	1	-	rs2370615	C	T	SNV	c(-2, 11)	FOXF2	jaspar2018	MA0030.1	MA0030.1	tttaccatatagtTgtttattcaccat	0.766136	0.916189	9.03196	10.7562	0.00234118	9.45032e-05	1	1.72423	0.147128	strong
chr8	81290387	81290387	1	-	rs2370615	C	T	SNV	c(-1, 6)	FOXG1	jaspar2018	MA0613.1	MA0613.1	atatagtTgtttatt	0.824963	0.979815	10.3986	12.3473	0.00106812	4.57764e-05	1	1.94869	0.154642	strong
chr8	81290387	81290387	1	-	rs2370615	C	T	SNV	c(-1, 6)	Foxj2	jaspar2018	MA0614.1	MA0614.1	atatagtTgtttatt	0.804431	0.992721	8.54411	10.5321	0.00234985	1.52588e-05	1	1.98797	0.187386	strong
chr8	81290387	81290387	1	-	rs2370615	C	T	SNV	c(-5, 11)	Foxj3	jaspar2018	MA0851.1	MA0851.1	ttatttaccatatagtTgtttattcaccatata	0.790934	0.932229	8.90262	10.4542	0.00118593	3.23435e-05	1	1.5516	0.138555	strong
chr8	81290387	81290387	1	-	rs2370615	C	T	SNV	c(-5, 11)	Foxk1	jaspar2018	MA0852.1	MA0852.1	ttatttaccatatagtTgtttattcaccatata	0.75754	0.864631	9.89051	11.2551	0.00122474	9.33401e-05	1	1.36464	0.105133	strong
chr8	81290387	81290387	1	-	rs2370615	C	T	SNV	c(-4, 9)	FOXK1	jaspar2018	MA0852.2	MA0852.2	tttaccatatagtTgtttattcaccat	0.748972	0.908932	7.73869	9.34978	0.00302278	8.05482e-05	1	1.61109	0.156919	strong
chr8	81290387	81290387	1	-	rs2370615	C	T	SNV	c(-2, 8)	FOXK2	jaspar2018	MA1103.1	MA1103.1	accatatagtTgtttattcac	0.788876	0.961525	7.5802	9.20445	0.00270081	9.53674e-05	1	1.62426	0.169787	strong
chr8	81290387	81290387	1	-	rs2370615	C	T	SNV	c(-2, 8)	FOXP2	jaspar2018	MA0593.1	MA0593.1	accatatagtTgtttattcac	0.780927	0.937785	9.93888	11.9236	0.00202465	6.58035e-05	1	1.98467	0.156141	strong
chr8	81290387	81290387	1	+	rs2370615	C	T	SNV	c(-4, 16)	MAFF	jaspar2018	MA0495.2	MA0495.2	tcatttatttaccatatagtTgtttattcaccatatagtca	0.721855	0.781781	9.6525	10.4017	0.00030696	4.88847e-05	1	0.749183	0.0570597	strong
chr8	81290387	81290387	1	+	rs2370615	C	T	SNV	c(-3, 15)	MAFK	jaspar2018	MA0496.2	MA0496.2	atttatttaccatatagtTgtttattcaccatatagt	0.712947	0.768951	9.90855	10.6486	0.000422578	8.5357e-05	1	0.74003	0.0540103	strong
chr4	38511871	38511871	1	-	rs2637706	T	A	SNV	c(-2, 7)	MAX	jaspar2018	MA0058.2	MA0058.2	taggcagccAtgtgttgtg	0.807515	0.975578	9.67602	11.6754	0.00144863	3.14713e-05	1	1.99937	0.167088	strong
chr4	38511871	38511871	1	+	rs2637706	T	A	SNV	c(-2, 7)	Myc	jaspar2018	MA0147.2	MA0147.2	taggcagccAtgtgttgtg	0.80545	0.976862	9.42725	11.4246	0.00154877	3.8147e-05	1	1.9974	0.170802	strong
chr20	62328375	62328375	1	-	rs2738787	A	G	SNV	c(-12, 1)	Tcfcp2l1	jaspar2018	MA0145.2	MA0145.2	tctggaactacctGgagcgctgccgct	0.866615	0.946979	8.31339	9.07063	0.000320934	2.15806e-05	1	0.757233	0.0791239	strong
chr20	62328375	62328375	1	-	rs2738787	A	G	SNV	c(-12, 1)	Tcfcp2l1	jaspar2018	MA0145.1	MA0145.1	tctggaactacctGgagcgctgccgct	0.867794	0.947038	8.30108	9.04565	0.000319868	2.18414e-05	1	0.74457	0.0780204	strong
chr22	37590203	37590203	1	+	rs2858489	A	C	SNV	c(-12, 3)	SIX2	jaspar2018	MA1119.1	MA1119.1	caagacagaaacctcAtctagtttttgtttc	0.850496	0.704728	9.47247	7.91464	8.16977e-05	0.00273264	1	-1.55784	-0.140723	strong
chr1	206939904	206939904	1	+	rs3024505	G	A	SNV	c(-6, 3)	MZF1(var.2)	jaspar2018	MA0057.1	MA0057.1	gcgtgagggGgactagtgt	0.980699	0.809286	5.92406	4.91819	3.05176e-05	0.00373459	1	-1.00588	-0.16661	strong
chr6	41945174	41945174	1	-	rs7768838	G	A	SNV	c(-9, 5)	Nfe2l2	jaspar2018	MA0150.2	MA0150.2	aatggtgctatctcAtctcactacaacct	0.707086	0.851631	9.97516	11.9591	0.00232249	6.73784e-05	1	1.98391	0.141754	strong
chr6	41945174	41945174	1	-	rs7768838	G	A	SNV	c(-9, 1)	NFE2L2	jaspar2018	MA0150.1	MA0150.1	gtgctatctcAtctcactaca	0.750037	0.904126	8.1956	9.83475	0.0025847	8.91685e-05	1	1.63915	0.151009	strong
chr19	49152708	49152708	1	+	rs35771957	G	C	SNV	c(-3, 17)	ZNF263	jaspar2018	MA0528.1	MA0528.1	ctagtcccagctgctcgggaGgatgaggcatgagaatcact	0.791396	0.669511	8.99628	7.6636	3.11295e-05	0.00212489	1	-1.33268	-0.118175	strong
chr19	1173840	1173840	1	+	rs372096825	C	T	SNV	c(-2, 9)	ELF1	jaspar2018	MA0473.2	MA0473.2	acagggagtcaCccggaagagcg	0.894402	0.859809	13.4439	12.929	2.3365e-05	7.31349e-05	1	-0.514922	-0.034292	weak
chr19	1173840	1173840	1	+	rs372096825	C	T	SNV	c(-2, 10)	ELF3	jaspar2018	MA0640.1	MA0640.1	tacagggagtcaCccggaagagcgg	0.879698	0.831081	14.0361	13.2663	2.21878e-05	9.59337e-05	1	-0.769749	-0.0482881	strong
chr19	1173840	1173840	1	+	rs372096825	C	T	SNV	c(-2, 9)	ELF4	jaspar2018	MA0641.1	MA0641.1	acagggagtcaCccggaagagcg	0.897505	0.867507	13.4291	12.9849	1.98483e-05	4.75645e-05	1	-0.444286	-0.0297238	weak
chr13	99910322	99910322	1	+	rs3759443	A	G	SNV	c(-4, 9)	POU4F1	jaspar2018	MA0790.1	MA0790.1	gcgcccagcctgtAttattaaaatgaa	0.862665	0.738338	9.29518	8.00426	7.01509e-05	0.00180644	1	-1.29092	-0.120408	strong
chr19	10426422	10426422	1	-	rs378395	A	C	SNV	c(-5, 5)	E2F1	jaspar2018	MA0024.2	MA0024.2	cctcctctccCgccgggcgcg	0.779639	0.95987	8.60865	10.5972	0.00373554	3.60012e-05	1	1.98858	0.180124	strong
chr19	10426422	10426422	1	+	rs378395	A	C	SNV	c(-4, 10)	E2F3	jaspar2018	MA0469.1	MA0469.1	gcgtcctcctctccCgccgggcgcgagcc	0.832667	0.967838	10.774	12.4978	0.000541571	1.10511e-05	1	1.72378	0.133544	strong
chr19	10426422	10426422	1	-	rs378395	A	C	SNV	c(-6, 4)	E2F4	jaspar2018	MA0470.1	MA0470.1	cctcctctccCgccgggcgcg	0.798643	0.966424	9.53064	11.5239	0.00170827	3.05176e-05	1	1.99322	0.167178	strong
chr19	10426422	10426422	1	-	rs378395	A	C	SNV	c(-6, 4)	E2F6	jaspar2018	MA0471.1	MA0471.1	cctcctctccCgccgggcgcg	0.798247	0.963137	9.55257	11.5178	0.00144863	2.7895e-05	1	1.96527	0.164359	strong
chr13	44453873	44453873	1	-	rs3816312	A	G	SNV	c(-1, 9)	Klf1	jaspar2018	MA0493.1	MA0493.1	gcggcgaggtGggtgaggtga	0.770512	0.910099	9.17477	10.8215	0.00209069	7.86781e-05	1	1.64675	0.138591	strong
chr13	44453873	44453873	1	-	rs3816312	A	G	SNV	c(-7, 12)	RREB1	jaspar2018	MA0073.1	MA0073.1	tgtgcggccgcggcgaggtGggtgaggtgaggcggggcg	0.782549	0.82939	10.2546	10.8448	8.10762e-05	1.30479e-05	1	0.590174	0.0454178	weak
chr21	45615963	45615963	1	-	rs4635612	T	G	SNV	c(-7, 2)	MZF1(var.2)	jaspar2018	MA0057.1	MA0057.1	ttttaccccTcaggggaca	0.983573	0.894997	5.94093	5.42115	2.09808e-05	0.00102425	1	-0.519779	-0.0860943	weak
chr21	45615963	45615963	1	+	rs4635612	T	G	SNV	c(-7, 7)	TFAP2A	jaspar2018	MA0003.2	MA0003.2	ggcaattttaccccTcaggggacactggc	0.902472	0.85106	9.66189	9.12478	5.90812e-05	0.000384888	1	-0.537107	-0.0502873	weak
chr3	188118572	188118572	1	+	rs4686484	G	A	SNV	c(-2, 9)	IRF1	jaspar2018	MA0050.1	MA0050.1	ttatgaacttcAagtgaaaccta	0.750225	0.866262	8.92913	10.2776	0.00153518	9.15527e-05	1	1.3485	0.113972	strong
chr3	188118572	188118572	1	-	rs4686484	G	A	SNV	c(-3, 5)	NKX2-8	jaspar2018	MA0673.1	MA0673.1	tgaacttcAagtgaaac	0.915438	0.984183	6.96404	7.48156	0.000881195	6.48499e-05	1	0.517521	0.0680892	weak
chr21	34817742	34817742	1	+	rs4817570	A	G	SNV	c(-5, 5)	NFIC	jaspar2018	MA0161.2	MA0161.2	tgtttttcttGgcatggcatg	0.852985	0.999756	8.33907	9.7424	0.000969648	6.4373e-06	1	1.40333	0.144009	strong
chr21	34817742	34817742	1	+	rs4817570	A	G	SNV	c(-5, 12)	TP53	jaspar2018	MA0106.3	MA0106.3	gaagtcttgtttttcttGgcatggcatgccacctt	0.710902	0.790015	12.4995	13.8654	0.000577884	5.21983e-05	1	1.36591	0.0780928	strong
chr21	34817742	34817742	1	-	rs4817570	A	G	SNV	c(-3, 11)	TP53	jaspar2018	MA0106.2	MA0106.2	gtcttgtttttcttGgcatggcatgccac	0.685303	0.825225	9.69597	11.6349	0.00307293	7.04257e-05	1	1.93891	0.137934	strong
chr6	159519948	159519948	1	+	rs78209538	C	T	SNV	c(-3, 7)	ETV2	jaspar2018	MA0762.1	MA0762.1	acctggtgaaCggaaacaact	0.87823	0.772142	11.6588	10.2593	0.000100136	0.00121641	1	-1.39941	-0.105496	strong
chr10	82214792	82214792	1	-	rs4934189	C	T	SNV	c(-14, 3)	ESR2	jaspar2018	MA0258.1	MA0258.1	tgggagcaaagcctgacCcctgacctagccggagt	0.844073	0.777931	9.1012	8.40692	9.28236e-05	0.000664491	1	-0.694284	-0.064657	weak
chr10	82214792	82214792	1	-	rs4934189	C	T	SNV	c(-4, 7)	INSM1	jaspar2018	MA0155.1	MA0155.1	caaagcctgacCcctgacctagc	0.912456	0.753487	9.81812	8.13038	2.92659e-05	0.00232691	1	-1.68774	-0.157035	strong
chr10	82214792	82214792	1	-	rs4934189	C	T	SNV	c(-6, 10)	NR1H2::RXRA	jaspar2018	MA0115.1	MA0115.1	gggagcaaagcctgacCcctgacctagccggag	0.794105	0.718847	18.2108	16.513	9.22859e-06	0.000115855	1	-1.6978	-0.0742833	strong
chr10	82214792	82214792	1	-	rs4934189	C	T	SNV	c(-4, 10)	NR2C2	jaspar2018	MA0504.1	MA0504.1	gagcaaagcctgacCcctgacctagccgg	0.919117	0.784646	11.817	10.1015	1.14553e-06	0.00018515	1	-1.71543	-0.13351	strong
chr10	82214792	82214792	1	+	rs4934189	C	T	SNV	c(-4, 9)	NR2F1	jaspar2018	MA0017.1	MA0017.1	agcaaagcctgacCcctgacctagccg	0.846209	0.691842	8.52016	7.02171	8.10064e-05	0.00372313	1	-1.49845	-0.14965	strong
chr10	82214792	82214792	1	-	rs4934189	C	T	SNV	c(-4, 9)	Nr2f6	jaspar2018	MA0677.1	MA0677.1	agcaaagcctgacCcctgacctagccg	0.861611	0.753784	13.8924	12.1815	4.58583e-06	0.000182725	1	-1.71093	-0.106346	strong
chr10	82214792	82214792	1	-	rs4934189	C	T	SNV	c(-5, 12)	PPARA::RXRA	jaspar2018	MA1148.1	MA1148.1	tgggagcaaagcctgacCcctgacctagccggagt	0.851048	0.742756	7.9983	7.02821	3.26095e-05	0.000788246	1	-0.970099	-0.103947	strong
chr10	82214792	82214792	1	-	rs4934189	C	T	SNV	c(-4, 10)	Pparg::Rxra	jaspar2018	MA0065.2	MA0065.2	gagcaaagcctgacCcctgacctagccgg	0.876604	0.745112	7.78734	6.66514	3.71914e-05	0.00161199	1	-1.1222	-0.126939	strong
chr10	82214792	82214792	1	-	rs4934189	C	T	SNV	c(-7, 12)	PPARG::RXRA	jaspar2018	MA0065.1	MA0065.1	tttgggagcaaagcctgacCcctgacctagccggagttc	0.790334	0.697461	15.5273	13.7287	3.41212e-05	0.000516031	1	-1.7986	-0.0918225	strong
chr10	82214792	82214792	1	-	rs4934189	C	T	SNV	c(-4, 9)	Rxra	jaspar2018	MA0512.2	MA0512.2	agcaaagcctgacCcctgacctagccg	0.81799	0.726275	17.4065	15.4605	1.90362e-05	0.000288017	1	-1.94597	-0.0914961	strong
chr10	82214792	82214792	1	-	rs4934189	C	T	SNV	c(-4, 9)	RXRB	jaspar2018	MA0855.1	MA0855.1	agcaaagcctgacCcctgacctagccg	0.811146	0.720619	17.7062	15.7348	1.93007e-05	0.00028887	1	-1.97141	-0.0903534	strong
chr10	82214792	82214792	1	-	rs4934189	C	T	SNV	c(-4, 9)	RXRG	jaspar2018	MA0856.1	MA0856.1	agcaaagcctgacCcctgacctagccg	0.826057	0.730557	17.2001	15.2155	1.50017e-05	0.000269722	1	-1.98455	-0.0953438	strong
chr15	75118732	75118732	1	+	rs532318141	A	G	SNV	c(-1, 9)	TFAP2A	jaspar2018	MA0003.3	MA0003.3	cgaccccaccGccgcaggccc	0.882286	0.971496	8.38523	9.22552	0.000408411	2.28882e-05	1	0.84029	0.0885074	strong
chr15	75118732	75118732	1	+	rs532318141	A	G	SNV	c(-1, 9)	TFAP2B(var.2)	jaspar2018	MA0812.1	MA0812.1	cgaccccaccGccgcaggccc	0.867362	0.96738	9.73183	10.8457	0.000379086	2.88486e-05	1	1.11391	0.099376	strong
chr15	75118732	75118732	1	+	rs532318141	A	G	SNV	c(-1, 9)	TFAP2C(var.2)	jaspar2018	MA0814.1	MA0814.1	cgaccccaccGccgcaggccc	0.852799	0.965537	8.46101	9.56714	0.000555992	3.8147e-05	1	1.10614	0.111671	strong
chr15	75118732	75118732	1	+	rs532318141	A	G	SNV	c(-6, 5)	ZBTB7B	jaspar2018	MA0694.1	MA0694.1	gcgaccccaccAccgcaggccct	0.898255	0.836838	11.1718	10.4192	8.27909e-05	0.000433385	1	-0.752579	-0.0606012	strong
chr15	75118732	75118732	1	+	rs532318141	A	G	SNV	c(-6, 5)	ZBTB7C	jaspar2018	MA0695.1	MA0695.1	gcgaccccaccAccgcaggccct	0.954148	0.850601	8.43418	7.54429	3.55244e-05	0.000877559	1	-0.889887	-0.1008	strong
chr19	1067178	1067178	1	+	rs537674408	C	G	SNV	c(-3, 7)	TFAP2A	jaspar2018	MA0003.3	MA0003.3	tccgcagagcCgcaggctgag	0.971157	0.85531	9.22233	8.13114	2.31266e-05	0.00077033	1	-1.09118	-0.114934	strong
chr19	1067178	1067178	1	+	rs537674408	C	G	SNV	c(-3, 7)	TFAP2B(var.2)	jaspar2018	MA0812.1	MA0812.1	tccgcagagcCgcaggctgag	0.971819	0.817153	10.8952	9.17265	2.19345e-05	0.00108051	1	-1.72254	-0.153674	strong
chr19	1067178	1067178	1	+	rs537674408	C	G	SNV	c(-6, 8)	TFAP2C	jaspar2018	MA0524.1	MA0524.1	ccactccgcagagcCgcaggctgaggccg	0.93901	0.840214	9.99165	8.95764	6.25905e-05	0.00100066	1	-1.03402	-0.0972737	strong
chr19	1067178	1067178	1	+	rs537674408	C	G	SNV	c(-3, 7)	TFAP2C(var.2)	jaspar2018	MA0814.1	MA0814.1	tccgcagagcCgcaggctgag	0.971267	0.822177	9.62336	8.16055	2.36034e-05	0.00106525	1	-1.46281	-0.14768	strong
[truncated: 3,202 more rows]
