# Supplementary material for: Dynamic chromatin architecture identifies new autoimmune-associated enhancers for IL2 and novel genes regulating CD4+ T cell activation
Source: eLife. 2024 Sep 20;13:RP96852. doi: 10.7554/eLife.96852 (PMC11418197; doi:10.7554/eLife.96852)
Supplement: Supplementary file 18. [file elife-96852-supp18.xlsx]

## Sheet: SupTab_16_orthogonal_data_impli
Table S18: V2G genes implicated by orthogonal data
phenotype	observed_v2g_with_ms_phenotype	total_phenotype	ratio	prob	expected	foldEnriched	p.value	logP	p.adjusted
mortality/aging	72	768	0.09375	0.0367394	37.3272	1.92889	6.03e-09	8.2199	1.45e-07
homeostasis/metabolism	154	2300	0.0669565	0.110027	111.787	1.37762	1.44e-05	4.84021	0.000346739
growth/size/body region	138	2053	0.0672187	0.0982109	99.7822	1.38301	3.5e-05	4.45575	0.000840351
behavior/neurological	159	2456	0.0647394	0.117489	119.369	1.332	6.88e-05	4.16253	0.00165074
skeleton	78	1052	0.0741445	0.0503253	51.1305	1.52551	7.71e-05	4.11294	0.00185042
embryo	36	407	0.0884521	0.01947	19.7815	1.81988	0.000179143	3.7468	0.00429943
hematopoietic system	126	1947	0.0647149	0.0931401	94.6303	1.3315	0.000430622	3.3659	0.0103349
immune system	97	1458	0.0665295	0.0697474	70.8634	1.36883	0.00079552	3.09935	0.0190925
integument	59	860	0.0686047	0.0411405	41.7987	1.41153	0.00416859	2.38001	0.100046
limbs/digits/tail	28	347	0.0806916	0.0165997	16.8653	1.66021	0.00450939	2.34588	0.108225
craniofacial	24	285	0.0842105	0.0136338	13.8519	1.73262	0.0045249	2.34439	0.108598
vision/eye	89	1395	0.0637993	0.0667336	67.8014	1.31266	0.00463312	2.33413	0.111195
digestive/alimentary	15	167	0.0898204	0.0079889	8.11672	1.84804	0.0122389	1.91226	0.293733
nervous system	45	671	0.0670641	0.0320991	32.6127	1.37983	0.017181	1.76495	0.412344
reproductive system	59	945	0.0624339	0.0452067	45.93	1.28456	0.0288372	1.54005	0.692094
cardiovascular system	82	1385	0.0592058	0.0662553	67.3153	1.21815	0.036795	1.43421	0.883081
adipose tissue	24	412	0.0582524	0.0197091	20.0245	1.19853	0.216391	0.664761	1
endocrine/exocrine gland	40	640	0.0625	0.0306162	31.106	1.28593	0.0631798	1.19942	1
hearing/vestibular/ear	21	307	0.0684039	0.0146862	14.9212	1.4074	0.0728383	1.13764	1
liver/biliary system	18	269	0.0669145	0.0128684	13.0742	1.37675	0.108985	0.962635	1
muscle	0	46	0	0.00220054	2.23574	0	0.877408	0.0567985	1
pigmentation	7	154	0.0454545	0.00736701	7.48488	0.935218	0.5	0.30103	1
renal/urinary system	38	626	0.0607029	0.0299464	30.4256	1.24895	0.0964256	1.01581	1
respiratory system	8	118	0.0677966	0.00564485	5.73517	1.3949	0.229946	0.638374	1

## Sheet: Marson Screen Promoter OCR
gwas	screen	hits	expected	observed	fold_enriched	P	fdr
any_gwas	IL2RA	GATA3,CREM,ETS1,FOXO1,STAT5B,DDX39B,IKZF1	1.9763	7	3.54198	0.000516509	0.00258255
any_gwas	IL2	TNFRSF9,RUNX3,CD244,DIEXF,RBM17,GATA3,NKX2-3,LSP1,CD44,CD6,CD5,CCDC88B,BCL9L,ETS1,PLEKHG6,TNFRSF1A,CD27,HDAC7,PITPNM2,GPR18,PSMA6,PRKCH,ZFP36L1,CYP1A1,PRKCB,SETD1A,SMARCE1,STAT5B,GRB2,SYNGR2,PRKD2,RPL18,DBP,PAPOLG,FIGLA,VAX2,AFF3,ARHGAP15,CD28,CTLA4,SP140L,FERMT1,CD40,NFATC2,RTEL1,ARFRP1,LIME1,IFNGR2,YDJC,PPIL2,IL2RB,RAC2,EOMES,CD80,TEC,IL2,LNPEP,SERPINB9,TAF8,BACH2,TRAF3IP2,PPIL4,IKZF1,IL7	29.8531	64	2.14383	1.15251e-09	1.72876e-08
any_gwas	CTLA4	RUNX3,ETS1,FOXO1,FOS,STAT3,ZNF652,IL1R1,CTLA4,NFATC2,IL2,IKZF1	2.45333	11	4.4837	1.92997e-06	2.17121e-05
any_gwas	IFNG	TNFRSF9,RUNX3,GATA3,FAM213A,FAM53B,CD44,BCL9L,TNFRSF1A,TAPBPL,ORMDL3,STAT5B,GRB2,TICAM1,SLC44A2,IL1R1,ARHGAP15,CD28,LTA,CCND3,TRAF3IP2,TAGAP,RNASET2,DAGLB	8.28574	23	2.77585	3.4087e-06	3.06783e-05
any_gwas	TNF	TNFRSF14,TNFRSF9,RUNX3,OAZ3,CD244,GATA3,MAP3K8,CD44,FADS3,CCDC88B,ETS1,PLEKHG6,TNFRSF1A,CD27,PITPNM2,GPR18,PRKCH,PRKCB,STAT5B,STAT3,GRB2,SYNGR2,DBP,DNAJC27,FIGLA,AFF3,ARHGAP15,CD28,TMBIM1,SP140,CD40,LIME1,IL2RB,RAC2,ABHD6,TEC,LTA,TNF,HLA-DQB1,BACH2,TRAF3IP2,RSPH3,IKZF1,PARP12,ELP3	20.8758	45	2.15561	3.31041e-07	4.25624e-06
any_gwas	Proliferation	TNFRSF14,IRF6,DIEXF,RBM17,GATA3,CREM,CD5,TMEM258,TRMT112,CCDC88B,DDX6,LTBR,CD27,HDAC7,RPS26,MPHOSPH9,SLC15A4,FOXO1,PSMA6,FOS,CSK,SOCS1,PRKCB,CTRB1,MYBBP1A,STAT3,GRB2,POLR2E,STK11,FDX1L,RPL18,THADA,REL,CD28,PPIL2,C1QTNF6,RAC2,PXK,IDUA,TEC,CCND3,TAF8,CENPW,ELMO1,TRAF1	29.8647	45	1.5068	0.00202536	0.0072913
SLE	IL2RA		0.171852	0	0	0.161258	0.188484
SLE	IL2	CD44,CYP1A1,GRB2,PAPOLG,CD40,YDJC,IL7	6.01138	7	1.16446	0.249726	0.268863
SLE	CTLA4		0.213333	0	0	0.197067	0.2217
SLE	IFNG	CD44,GRB2,SLC44A2	1.67993	3	1.78579	0.0870728	0.117135
SLE	TNF	CD44,GRB2,CD40,ABHD6,ELP3	4.23254	5	1.18132	0.247102	0.268863
SLE	Proliferation	SLC15A4,CSK,GRB2,POLR2E,STK11,PXK,IDUA	6.09483	7	1.14851	0.261849	0.277252
IBD	IL2RA	CREM,ETS1	0.257778	2	7.75862	0.00137412	0.00562141
IBD	IL2	CD244,LSP1,CD6,ETS1,TNFRSF1A,HDAC7,PRKCB,CD40,IFNGR2,LNPEP,TRAF3IP2	3.66796	11	2.99894	0.000146966	0.000881798
IBD	CTLA4	ETS1	0.32	1	3.125	0.0366017	0.0621538
IBD	IFNG	FAM53B,TNFRSF1A,TRAF3IP2	1.02504	3	2.92672	0.0186271	0.0399152
IBD	TNF	TNFRSF14,CD244,MAP3K8,ETS1,TNFRSF1A,PRKCB,DNAJC27,TMBIM1,SP140,CD40,TRAF3IP2	2.58257	11	4.25933	4.38655e-06	3.58899e-05
IBD	Proliferation	TNFRSF14,IRF6,CREM,LTBR,HDAC7,SOCS1,PRKCB	3.96164	7	1.76695	0.0395094	0.065849
UC	IL2RA	CREM,ETS1,IKZF1	0.515556	3	5.81897	0.001175	0.00503571
UC	IL2	DIEXF,NKX2-3,LSP1,CD6,CD5,ETS1,PLEKHG6,TNFRSF1A,CD27,GPR18,PRKCB,RPL18,DBP,SP140L,FERMT1,CD40,IFNGR2,YDJC,LNPEP,TAF8,BACH2,TRAF3IP2,IKZF1	9.88312	23	2.3272	3.00382e-05	0.000193103
UC	CTLA4	ETS1,STAT3,IKZF1	0.64	3	4.6875	0.00266079	0.00871143
UC	IFNG	FAM213A,FAM53B,TNFRSF1A,TAPBPL,CCND3,TRAF3IP2,DAGLB	2.76191	7	2.53448	0.00646832	0.0176409
UC	TNF	TNFRSF14,MAP3K8,ETS1,PLEKHG6,TNFRSF1A,CD27,GPR18,PRKCB,STAT3,DBP,DNAJC27,TMBIM1,SP140,CD40,BACH2,TRAF3IP2,IKZF1	6.95858	17	2.44303	0.000164986	0.000928047
UC	Proliferation	TNFRSF14,IRF6,DIEXF,CREM,CD5,LTBR,CD27,SOCS1,PRKCB,STAT3,POLR2E,STK11,RPL18,THADA,CCND3,TAF8	10.158	16	1.57511	0.0232896	0.046254
MS	IL2RA		0.042963	0	0	0.042963	0.070303
MS	IL2	PITPNM2,ZFP36L1,CD28,CD40,LIME1,BACH2	2.24153	6	2.67674	0.00485071	0.0140827
MS	CTLA4		0.0533333	0	0	0.0533333	0.0834613
MS	IFNG	CD28	0.626413	1	1.59639	0.128738	0.160922
MS	TNF	PITPNM2,CD28,CD40,LIME1,BACH2	1.57824	5	3.16809	0.00370234	0.011107
MS	Proliferation	TRMT112,DDX6,CD28,ELMO1	2.13319	4	1.87513	0.055084	0.0840264
RA	IL2RA	GATA3	0.214815	1	4.65517	0.0166908	0.0375542
RA	IL2	TNFRSF9,GATA3,CD5,PRKCH,CD40,IFNGR2,YDJC,IL2RB,RAC2,EOMES,TEC,PPIL4	3.05663	12	3.92589	2.77995e-06	2.77995e-05
RA	CTLA4		0.266667	0	0	0.240017	0.266686
RA	IFNG	TNFRSF9,GATA3	0.8542	2	2.34137	0.0527954	0.0834613
RA	TNF	TNFRSF9,GATA3,FADS3,PRKCH,CD40,IL2RB,RAC2,TEC	2.15214	8	3.71723	0.000176231	0.000932988
RA	Proliferation	GATA3,CD5,DDX6,REL,RAC2,PXK,TEC,TRAF1	3.04741	8	2.62518	0.00223239	0.0077275
CRO	IL2RA	CREM	0.386667	1	2.58621	0.0537862	0.0834613
CRO	IL2	CD244,NKX2-3,CCDC88B,BCL9L,ARFRP1,IFNGR2,IL2,LNPEP	4.27929	8	1.86947	0.0234138	0.046254
CRO	CTLA4	FOS,STAT3,IL2	0.48	3	6.25	0.000765831	0.00362762
CRO	IFNG	FAM53B,BCL9L,TAGAP	1.16741	3	2.5698	0.0286761	0.0516169
CRO	TNF	OAZ3,CD244,MAP3K8,CCDC88B,STAT3,SP140	2.94126	6	2.03994	0.025237	0.0473194
CRO	Proliferation	IRF6,CREM,TMEM258,CCDC88B,LTBR,FOS,SOCS1,STAT3	4.57112	8	1.75012	0.0347477	0.0601403
ALG	IL2RA	FOXO1,STAT5B,DDX39B	0.558519	3	5.37135	0.0016431	0.00642953
ALG	IL2	RUNX3,HDAC7,PSMA6,STAT5B,ARHGAP15,NFATC2,RTEL1,IL2,BACH2	4.1774	9	2.15445	0.00690567	0.0182797
ALG	CTLA4	RUNX3,FOXO1,ZNF652,NFATC2,IL2	0.693333	5	7.21154	2.38699e-05	0.000165253
ALG	IFNG	RUNX3,ORMDL3,STAT5B,ARHGAP15	1.16741	4	3.4264	0.00590926	0.0166198
ALG	TNF	RUNX3,STAT5B,ARHGAP15,BACH2	2.94126	4	1.35996	0.16808	0.193939
ALG	Proliferation	DDX6,HDAC7,RPS26,MPHOSPH9,FOXO1,PSMA6,MYBBP1A,TRAF1	4.1648	8	1.92086	0.0197885	0.0414179
VIT	IL2RA		0.128889	0	0	0.123518	0.156572
VIT	IL2	CCDC88B,SYNGR2,CD80,SERPINB9,BACH2	2.34342	5	2.13363	0.024506	0.0469264
VIT	CTLA4		0.16	0	0	0.151725	0.179674
VIT	IFNG	TICAM1,RNASET2	0.626413	2	3.19278	0.0236409	0.046254
VIT	TNF	CCDC88B,SYNGR2,BACH2,PARP12	1.57824	4	2.53448	0.0177758	0.03902
VIT	Proliferation	CCDC88B,RPS26	2.43793	2	0.820368	0.446257	0.451271
T1D	IL2RA		0.0859259	0	0	0.0841106	0.117135
T1D	IL2	SMARCE1,PRKD2,AFF3,CTLA4	1.42643	4	2.80421	0.00995906	0.0248977
T1D	CTLA4	CTLA4	0.106667	1	9.375	0.00280702	0.00871143
T1D	IFNG		0.398627	0	0	0.332725	0.344198
T1D	TNF	AFF3	1.00433	1	0.995687	0.265717	0.278075
T1D	Proliferation	RPS26,SOCS1,CTRB1,CENPW	1.52371	4	2.62518	0.01353	0.0320448
JIA	IL2RA		0.0859259	0	0	0.0841106	0.117135
JIA	IL2	RBM17,YDJC,IL2RB,RAC2,IL2,LNPEP	1.01888	6	5.88883	1.02651e-05	7.69886e-05
JIA	CTLA4	IL2	0.106667	1	9.375	0.00280702	0.00871143
JIA	IFNG		0.284733	0	0	0.250939	0.268863
JIA	TNF	IL2RB,RAC2	0.71738	2	2.78792	0.0301812	0.053261
JIA	Proliferation	RBM17,FDX1L,C1QTNF6,RAC2	1.0158	4	3.93776	0.00174943	0.00656037
ECZ	IL2RA	DDX39B	0.42963	1	2.32759	0.065411	0.0981166
ECZ	IL2	FIGLA,VAX2,ARFRP1	2.03776	3	1.47221	0.139724	0.169935
ECZ	CTLA4	IL1R1	0.533333	1	1.875	0.0956751	0.126629
ECZ	IFNG	IL1R1,LTA	0.540993	2	3.6969	0.0158393	0.0365522
ECZ	TNF	FIGLA,LTA,TNF,HLA-DQB1	1.36302	4	2.93466	0.00938547	0.0241341
ECZ	Proliferation		1.82845	0	0	0.854711	0.854711
PSO	IL2RA		0.128889	0	0	0.123518	0.156572
PSO	IL2	SETD1A,YDJC,PPIL2	1.73209	3	1.73201	0.0872004	0.117135
PSO	CTLA4		0.16	0	0	0.151725	0.179674
PSO	IFNG	TAGAP	0.484046	1	2.06592	0.0830536	0.117135
PSO	TNF	RSPH3	1.21955	1	0.819977	0.347308	0.355202
PSO	Proliferation	TRMT112,REL,PPIL2	1.72687	3	1.73725	0.0864228	0.117135
CEL	IL2RA		0	0	NA	0	0
CEL	IL2	ZFP36L1	0.203776	1	4.90736	0.0103771	0.0252416
CEL	CTLA4		0	0	NA	0	0
CEL	IFNG	TAGAP	0.0569466	1	17.5603	0.000809269	0.00364171
CEL	TNF		0.143476	0	0	0.138333	0.169935
CEL	Proliferation		0.203161	0	0	0.192847	0.219699
AS	IL2RA		0	0	NA	0	0
AS	IL2	YDJC	0.101888	1	9.81472	0	0
AS	CTLA4		0	0	NA	0	0
AS	IFNG		0.0284733	0	0	0.0284733	0.0516169
AS	TNF		0.071738	0	0	0.071738	0.105843
AS	Proliferation		0.10158	0	0	0.10158	0.132496

## Sheet: Marson Screen V2G enrichment
gwas	screen	hits	expected	observed	fold_enriched	P	fdr
any_gwas	IL2RA	FOXP1,BCL6,RBPJ,PTPRC,IRF1,IRF4,DDX39B,PRDM1,TNFAIP3,IKZF1,MYC,IL2RA,IL15RA,CREM,NFKB2,RELA,ETS1,FOXO1,IKZF3,STAT5A,STAT5B	5.4563	21	3.84876	1.44619e-09	3.47086e-08
any_gwas	IL2	IFNGR2,GART,CRYAA,PFKL,PPIL2,YDJC,CD247,IL2RB,RAC2,SSTR3,APOBEC3C,APOBEC3D,EOMES,FOXP1,NIT2,RASA2,ATP1B3,GAK,RBPJ,RHOH,TXK,SLC39A8,DNAJB14,NFKB1,KIAA1109,IL2,PTPRC,RIOK2,LNPEP,ARAP3,PCDH12,RBM22,RPS14,RUNX3,NSD1,IRF4,CCHCR1,PSORS1C2,PRRC2A,CSNK2B,ATF6B,HLA-DQA2,TAP2,BTNL2,KCTD20,STK38,TAF8,SPATS1,BACH2,CASP8AP2,PRDM1,THEMIS,PPIL4,SYTL3,RAC1,ITPKB,IKZF1,ZPBP,CDK6,ZNF395,MYC,PLCH2,IL2RA,RBM17,TTC34…	114.216	202	1.76858	1.05104e-16	1.009e-14
any_gwas	CTLA4	SATB1,FOXP1,IL2,IRF1,RUNX3,NSD1,IRF4,SKIV2L,TNFAIP3,IKZF1,MYC,NFIL3,EGR2,RELA,ETS1,FLI1,FOXO1,BCL11B,IKZF3,STAT3,IL1R1,CTLA4,ZBTB7B,NFATC2	6.77333	24	3.54331	8.43516e-10	2.69925e-08
any_gwas	IFNG	CD247,APOBEC3C,CMC1,H2AFZ,PTPRC,RUNX3,LTA,BAK1,CCND3,TAGAP,RNASET2,DAGLB,ITPKB,CDK6,MYC,RER1,FAM213A,FAM53B,CD44,BCL9L,DPAGT1,CD9,TAPBPL,TNFRSF1A,TNFRSF9,IL12RB2,BCL11B,ITPKA,RORA,SNX20,STAT5B,GRB2,SLC44A2,CDKN2D,ZNF114,IL1R1,STAT4,POGZ,CD28,USP37,DNTTIP1,CEBPB,SLAMF1,HELZ2,SOX18	31.7762	45	1.41615	0.00758576	0.0145647
any_gwas	TNF	IFNAR2,IL2RB,RAC2,SSTR3,CMC1,ABHD6,RASA2,DNAJB14,NCMAP,PTPRC,RUNX3,IRF4,LTA,NCR3,TNF,HLA-DQB1,TAP1,TNXB,UQCC2,BACH2,MDN1,WISP3,RSPH3,RAC1,ITPKB,DDC,IKZF1,SLC37A3,RAB19,MYC,RER1,TNFRSF14,ARHGAP12,ZEB1,RPS24,CUEDC2,CD44,FADS3,MYRF,RAB3IL1,FERMT3,CCDC88B,KAT5,RELA,FOSL1,SLC37A4,ETS1,TNFRSF1A,CD27,PLEKHG6,TNFRSF9,ENDOU,ANKRD52,RAB5B,PIP4K2C,PITPNM2,GPR18,PRKCH,C15orf53,RASGRP1,ITPKA,RORA,CRTC3,PRKCB,…	80.0596	94	1.17413	0.0446045	0.0669067
any_gwas	Proliferation	GART,PPIL2,CD247,C1QTNF6,RAC2,MFNG,POLR3H,PHF5A,FLNB,PDHB,PXK,FOXP1,SHQ1,NIT2,RASA2,ATP1B3,TFDP2,LPP,CEP19,IDUA,N4BP2,RHOH,NFKB1,KIAA1109,EXOSC9,SPATA5,RAD1,BRIX1,RIOK2,SLC22A5,LMAN2,PRELID1,IRF4,WRNIP1,CCHCR1,CSNK2B,LSM2,VARS,PSMB8,PSMB9,NOTCH4,BYSL,CCND3,TAF8,IRF6,MDN1,TNFAIP3,NUP43,RAC1,ITPKB,ELMO1,CDK6,MYC,RBM17,NFIL3,TRAF1,C9orf114,DOLK,NUP188,DNLZ,SNAPC4,TNFRSF14,CREM,ZNF25,EGR2,POLR3A,RPS2…	114.583	166	1.44873	2.75232e-07	2.20186e-06
UC	IL2RA	BCL6,IRF1,PRDM1,IKZF1,MYC,CREM,ETS1,FOXO1,STAT5A,STAT5B	1.46074	10	6.84584	4.68564e-08	5.62277e-07
UC	IL2	IFNGR2,GART,PFKL,PPIL2,YDJC,APOBEC3C,APOBEC3D,NIT2,IL2,RIOK2,LNPEP,ARAP3,PCDH12,RBM22,RPS14,TAF8,BACH2,CASP8AP2,PRDM1,RAC1,IKZF1,MYC,PLCH2,TTC34,CARD9,ZNF25,RPS24,SMC3,LSP1,CCDC86,CD5,CD6,PRPF19,ETS1,NCAPD2,TNFRSF1A,CD27,PLEKHG6,NOP2,SLC45A1,SERBP1,HDAC7,TNFSF11,GPR18,BLM,PRKCB,ISG15,CCL1,STAT5A,STAT5B,MXRA8,NOC2L,ARID3A,CFD,RPL18,EMP3,ZNF114,DBP,RUVBL2,RPL13A,PPM1G,PAPOLG,SP140L,INPP5D,GIGYF2,IN…	38.6155	68	1.76095	1.30772e-06	8.3694e-06
UC	CTLA4	IL2,IRF1,IKZF1,MYC,NFIL3,ETS1,FLI1,FOXO1,STAT3	1.81333	9	4.96324	4.66135e-06	2.48605e-05
UC	IFNG	APOBEC3C,CCND3,RNASET2,DAGLB,MYC,RER1,FAM213A,FAM53B,CD9,TAPBPL,TNFRSF1A,IL12RB2,STAT5B,ZNF114,USP37,DNTTIP1	10.7629	16	1.48659	0.0435518	0.0663646
UC	TNF	IFNAR2,BACH2,MDN1,WISP3,RAC1,DDC,IKZF1,MYC,RER1,RPS24,ETS1,TNFRSF1A,CD27,PLEKHG6,GPR18,PRKCB,ATXN2L,STAT3,STAT5A,STAT5B,EMP3,DBP,GRWD1,TMBIM1,SP140,CD244,ITLN1	27.117	27	0.995687	0.458347	0.474309
UC	Proliferation	GART,PPIL2,NIT2,RIOK2,SLC22A5,LMAN2,PRELID1,BYSL,CCND3,TAF8,IRF6,MDN1,RAC1,MYC,NFIL3,DNLZ,SNAPC4,CREM,ZNF25,POLR3A,RPS24,SMNDC1,PSTK,CCDC86,CD5,LTBR,NCAPD2,CD27,NOP2,HDAC7,FOXO1,NUFIP1,SOCS1,PRKCB,ATXN2L,STAT3,STAT5A,CPSF3L,NOC2L,POLR2E,STK11,WDR18,RPL18,ZNF114,RUVBL2,FTL,EIF2B4,GPN1,IFT172,THADA,RQCD1,SLC11A1,USP37,C20orf203	38.8037	54	1.39162	0.00507012	0.0108163
ALG	IL2RA	BCL6,DDX39B,PRDM1,TNFAIP3,IKZF1,IL15RA,IL2RA,NFKB2,ETS1,FOXO1,STAT5A,STAT5B	2.19111	12	5.47667	5.92698e-08	5.96647e-07
ALG	IL2	CRYAA,CD247,RASA2,ATP1B3,NFKB1,SLC39A8,ARAP3,PCDH12,RUNX3,NSD1,CCHCR1,PSORS1C2,CSNK2B,PRRC2A,BACH2,CASP8AP2,PRDM1,THEMIS,ITPKB,IKZF1,IL2RA,RBM17,FBXW2,DOLK,GBF1,NFKB2,TRIM8,PPP2R1B,BCL9L,ETS1,HDAC7,GDF11,ANKRD52,DGKA,DDX55,OGFOD2,PITPNM2,ZFP36L1,ITPKA,RORA,CRTC3,ZNF774,NEUROD2,EIF1,STAT5A,STAT5B,SERTAD2,PLCL1,NFATC2,HELZ2,RTEL1,ARFRP1,LIME1,PRPF6,SDHC	26.6946	55	2.06034	6.21508e-08	5.96647e-07
ALG	CTLA4	RUNX3,NSD1,SKIV2L,TNFAIP3,IKZF1,EGR2,ETS1,FLI1,FOXO1,NFATC2	2.72	10	3.67647	3.95502e-05	0.000165079
ALG	IFNG	CD247,RUNX3,LTA,BAK1,ITPKB,BCL9L,ITPKA,RORA,STAT5B,HELZ2	7.43154	10	1.34562	0.127321	0.156703
ALG	TNF	RASA2,RUNX3,LTA,NCR3,TNF,UQCC2,BACH2,ITPKB,IKZF1,CUEDC2,ETS1,ANKRD52,RAB5B,PITPNM2,ITPKA,RORA,CRTC3,EIF1,STAT5A,STAT5B,SERTAD2,GMEB2,LIME1	18.7236	23	1.2284	0.126007	0.156703
ALG	Proliferation	CD247,POLR3H,PHF5A,SHQ1,RASA2,ATP1B3,TFDP2,LPP,CEP19,NFKB1,LMAN2,PRELID1,CCHCR1,CSNK2B,LSM2,VARS,TNFAIP3,ITPKB,RBM17,TRAF1,C9orf114,DOLK,NUP188,EGR2,FBXL15,GBF1,PITX3,DDX6,HDAC7,PA2G4,RPS26,DGKA,ENO1,ABCB9,MPHOSPH9,TMED2,FOXO1,NFKBIA,STAT5A,MAP3K14,ATP8B2,OPRL1,SAMD10,SDHC	26.3093	44	1.67241	0.000237377	0.000876467
CRO	IL2RA	FOXP1,BCL6,PTPRC,IRF1,IKZF1,MYC,IL2RA,IL15RA,CREM,STAT5A,STAT5B	1.20296	11	9.14409	2.21889e-10	1.06507e-08
CRO	IL2	PFKL,PPIL2,YDJC,FOXP1,PTPRC,LNPEP,RIOK2,PCDH12,ARAP3,RBM22,RPS14,BACH2,THEMIS,IKZF1,MYC,RBM17,IL2RA,CARD9,ZNF25,RPS24,FERMT3,CCDC88B,BCL9L,FOXR1,TNFRSF1A,SLC45A1,TNFSF11,C15orf53,RASGRP1,STAT5A,STAT5B,SRSF1,STXBP4,TRIM25,PAPOLG,SNX27,PLCL1,SP140L,LIME1,PRPF6,RTEL1,SOX18,ARFRP1,CD244	20.1738	44	2.18105	1.90172e-07	1.65968e-06
CRO	CTLA4	FOXP1,IRF1,IKZF1,MYC,EGR2,STAT3	1.49333	6	4.01786	0.000440735	0.00145898
CRO	IFNG	PTPRC,CCND3,RNASET2,MYC,FAM213A,BCL9L,DPAGT1,TNFRSF1A,STAT5B,POGZ,SOX18	5.58077	11	1.97105	0.0106101	0.0195879
CRO	TNF	PTPRC,BACH2,IKZF1,MYC,RPS24,FADS3,MYRF,RAB3IL1,FERMT3,CCDC88B,SLC37A4,TNFRSF1A,C15orf53,RASGRP1,ATXN2L,STAT3,STAT5A,STAT5B,POGZ,LIME1,SOX18,GMEB2,CD244,ITLN1	14.0606	24	1.70689	0.00361753	0.0082371
CRO	Proliferation	PPIL2,FOXP1,RIOK2,SLC22A5,BYSL,CCND3,IRF6,MYC,RBM17,DNLZ,SNAPC4,CREM,ZNF25,EGR2,RPS24,PSTK,MYRF,CCDC88B,TRMT112,DDX6,TREH,C2CD2L,DPAGT1,LTBR,TMED10,RASGRP1,ATXN2L,STAT3,STAT5A,SRSF1,CTIF,SNX27,OPRL1,SAMD10	20.3161	34	1.67355	0.00097023	0.00291069
IBD	IL2RA	BCL6,IRF1,IKZF1,MYC,CREM,ETS1,FOXO1	0.859259	7	8.14655	6.01137e-07	4.43917e-06
IBD	IL2	PFKL,PPIL2,YDJC,IL2,LNPEP,RIOK2,ARAP3,PCDH12,RBM22,RPS14,BACH2,IKZF1,MYC,PLCH2,TTC34,CARD9,ZNF25,RPS24,LSP1,CD5,CD6,PRPF19,ETS1,CD27,NCAPD2,TNFRSF1A,SLC45A1,HDAC7,TNFSF11,GPR18,BLM,PRKCB,ISG15,SNX20,PAPD5,MXRA8,NOC2L,PAPOLG,SP140L,GIGYF2,INPP5D,CD244	22.3134	42	1.88227	1.9244e-05	8.79724e-05
IBD	CTLA4	IL2,IRF1,IKZF1,MYC,NFIL3,ETS1,FLI1,FOXO1,STAT3	1.06667	9	8.4375	1.2022e-08	1.92353e-07
IBD	IFNG	CCND3,MYC,RER1,FAM213A,TAPBPL,TNFRSF1A,SNX20,USP37	6.23566	8	1.28294	0.174009	0.206233
IBD	TNF	BACH2,WISP3,IKZF1,MYC,RER1,RPS24,ETS1,CD27,TNFRSF1A,ENDOU,GPR18,PRKCB,ATXN2L,STAT3,TMBIM1,SP140,CD244,ITLN1	15.7106	18	1.14572	0.226029	0.25528
IBD	Proliferation	PPIL2,RIOK2,SLC22A5,LMAN2,PRELID1,BYSL,CCND3,IRF6,MYC,NFIL3,DNLZ,SNAPC4,CREM,ZNF25,RPS24,PSTK,CD5,CD27,LTBR,NCAPD2,HDAC7,RPAP3,FOXO1,PRKCB,ATXN2L,PAPD5,STAT3,CPSF3L,NOC2L,RQCD1,SLC11A1,USP37,C20orf203	22.754	33	1.45029	0.0113242	0.0205118
AS	IL2RA		0.214815	0	0	0.1974	0.2256
AS	IL2	PFKL,RUNX3,BACH2,CARD9,RPS24,CD27,NCAPD2,SH2B3	3.56607	8	2.24336	0.00707241	0.0141448
AS	CTLA4	RUNX3,IL1R1	0.266667	2	7.5	0.00134791	0.00380587
AS	IFNG	RUNX3,TAPBPL,IL1R1	0.996566	3	3.01034	0.0169284	0.0290202
AS	TNF	RUNX3,BACH2,RPS24,CD27,LYRM9	2.51083	5	1.99137	0.0364284	0.0564053
AS	Proliferation	BRIX1,RAD1,DNLZ,SNAPC4,RPS24,CD27,LTBR,NCAPD2,ATXN2	3.55532	9	2.53142	0.00193998	0.00517329
T1D	IL2RA	IKZF1,IL15RA,IL2RA,IKZF3	0.558519	4	7.1618	0.000121764	0.000467574
T1D	IL2	PFKL,IL2RB,BACH2,IKZF1,ZPBP,IL2RA,RBM17,KLRB1,ANKRD52,DGKA,GDF11,BCL11B,C15orf53,RASGRP1,CFDP1,CTRB2,IKZF3,EIF1,SMARCE1,ICOS	8.04914	20	2.48474	2.94425e-05	0.000128476
T1D	CTLA4	IKZF1,BCL11B,IKZF3	0.693333	3	4.32692	0.00368953	0.0082371
T1D	IFNG	BCL11B	2.22092	1	0.450264	0.655347	0.662246
T1D	TNF	IL2RB,BACH2,IKZF1,ANKRD52,RAB5B,C15orf53,RASGRP1,ATXN2L,IKZF3,EIF1	5.59556	10	1.78713	0.0229759	0.0367614
T1D	Proliferation	RAD1,BRIX1,RBM17,DGKA,PA2G4,RASGRP1,SOCS1,ATXN2L	8.22802	8	0.972287	0.440902	0.470296
CEL	IL2RA		0.171852	0	0	0.161258	0.19351
CEL	IL2	PFKL,CD247,BACH2,ZFP36L1,CTLA4	1.83398	5	2.72631	0.0070056	0.0141448
CEL	CTLA4	CTLA4	0.213333	1	4.6875	0.0156984	0.0274008
CEL	IFNG	CD247	0.51252	1	1.95114	0.0917326	0.119004
CEL	TNF	BACH2	1.29128	1	0.774423	0.373909	0.407901
CEL	Proliferation	CD247,ELMO1,REL	1.82845	3	1.64074	0.102577	0.131299
RA	IL2RA	RBPJ,IRF4,PRDM1,MYC,IL15RA,ETS1,FOXO1,IKZF3	1.20296	8	6.65025	9.73241e-07	6.67365e-06
RA	IL2	PPIL2,YDJC,IL2RB,RAC2,RBPJ,TXK,KIAA1109,IL2,IRF4,ATF6B,HLA-DQA2,TAP2,SPATS1,PRDM1,PPIL4,CDK6,MYC,RBM17,FBXW2,ARHGAP12,ZEB1,CD6,CD5,PRPF19,CCDC86,BCL9L,FOXR1,ETS1,TNFRSF9,SLC45A1,SLC25A15,PRKCH,TMEM30B,ZFP36L1,C15orf53,RASGRP1,IKZF3	14.7737	37	2.50445	3.287e-08	4.50788e-07
RA	CTLA4	IL2,IRF4,MYC,ETS1,FLI1,FOXO1,IKZF3	1.49333	7	4.6875	5.833e-05	0.00023332
RA	IFNG	CMC1,TAGAP,CDK6,MYC,BCL9L,TNFRSF9,STAT4	4.12863	7	1.69548	0.0557528	0.0787098
RA	TNF	IL2RB,RAC2,CMC1,IRF4,HLA-DQB1,TAP1,TNXB,RSPH3,MYC,ARHGAP12,ZEB1,ETS1,TNFRSF9,PIP4K2C,PRKCH,C15orf53,RASGRP1,IKZF3	10.402	18	1.73044	0.00778594	0.0146559
RA	Proliferation	PPIL2,C1QTNF6,RAC2,MFNG,PDHB,PXK,KIAA1109,EXOSC9,SPATA5,IRF4,PSMB8,PSMB9,NUP43,CDK6,MYC,RBM17,TRAF1,TRIM44,CD5,CCDC86,TMEM258,DDX6,PA2G4,AGAP2,FOXO1,SNAPC1,RASGRP1,RTTN,YPEL5,CASP8,ATP8B2	14.7292	31	2.10467	1.85354e-05	8.79724e-05
SLE	IL2RA	TNFAIP3,IL2RA,RELA	0.644444	3	4.65517	0.00294024	0.00688446
SLE	IL2	PPIL2,YDJC,GAK,KCTD20,STK38,ZNF395,IL2RA,RBM17,CD44,KAT5,RELA,SART1,FOSL1,ISG15,CLK3,SMPD3,MXRA8,NOC2L,GRB2,ARID3A,CFD,ILF3,CDKN2D,DNM2,UPF1,CCNT2,PLCL1,PYGO2,CKS1B,ZBTB7B	24.0455	30	1.24763	0.0847605	0.11155
SLE	CTLA4	TNFAIP3,RELA,ZBTB7B	0.8	3	3.75	0.0064922	0.0135489
SLE	IFNG	CD44,GRB2,SLC44A2,CDKN2D,STAT4,DNTTIP1	6.69123	6	0.896696	0.505542	0.516299
SLE	TNF	ABHD6,CD44,KAT5,RELA,FOSL1,GRB2,AP1M2,CCNT2,EFNA4	16.8584	9	0.533858	0.976541	0.976541
SLE	Proliferation	PPIL2,FLNB,PDHB,PXK,IDUA,TNFAIP3,RBM17,EIF1AD,KAT5,RELA,SART1,FAM132A,RNF223,CSK,RPP25,SIN3A,C15orf39,SOCS1,TANGO6,CPSF3L,NOC2L,GRB2,ARMC7,POLR2E,STK11,WDR18,ILF3,KRI1,DNM2,MAP4K4,DPM3,PMVK	24.6841	32	1.29638	0.0517265	0.0752386
JIA	IL2RA	IL2RA,IL15RA	0.300741	2	6.65025	0.00233141	0.00588988
JIA	IL2	IL2RB,RAC2,SSTR3,KIAA1109,IL2,LNPEP,RIOK2,RUNX3,IL2RA,RBM17	4.1774	10	2.39383	0.00210352	0.00545777
JIA	CTLA4	IL2,RUNX3	0.373333	2	5.35714	0.00436399	0.00952143
JIA	IFNG	RUNX3	1.16741	1	0.8566	0.32648	0.360254
JIA	TNF	IL2RB,RAC2,SSTR3,RUNX3,MRPL4	2.94126	5	1.69995	0.0704368	0.0952385
JIA	Proliferation	C1QTNF6,RAC2,MFNG,KIAA1109,RIOK2,RBM17,CDC37,FDX1L	4.1648	8	1.92086	0.0197885	0.0333281
PSO	IL2RA	IRF4,ETS1	0.42963	2	4.65517	0.0072867	0.014276
PSO	IL2	YDJC,PPIL2,RPS14,IRF4,SYTL3,RPS24,CCDC88B,FERMT3,ETS1,ANKRD52,GDF11,MYL6,IL23A,PSMA6,RNF40,SETD1A,KAT8,PAPOLG,CEBPB	8.86424	19	2.14344	0.000386061	0.00132364
PSO	CTLA4	IRF4,ETS1,FLI1	0.533333	3	5.625	0.0012251	0.00356394
PSO	IFNG	TAGAP,CEBPB	2.47718	2	0.80737	0.452363	0.474309
PSO	TNF	NCMAP,IRF4,RSPH3,RPS24,CCDC88B,FERMT3,ETS1,ANKRD52,ZNF267,VKORC1,CEBPB	6.2412	11	1.76248	0.0211892	0.0344773
PSO	Proliferation	PPIL2,SLC22A5,IRF4,ELMO1,RPS24,POLR3A,CCDC88B,PA2G4,NFKBIA,PSMA6,ZNF843,REL,CCT4	8.8375	13	1.471	0.0552989	0.0787098
VIT	IL2RA	FOXP1,IRF4,IKZF1,ETS1	0.644444	4	6.2069	0.00026582	0.000945138
VIT	IL2	FOXP1,RHOH,SLC39A8,DNAJB14,IRF4,BACH2,CASP8AP2,IKZF1,CD44,FERMT3,CCDC88B,ETS1,ANKRD52,DGKA,GDF11,PRR12,RPL13A,RPS11,RRAS,SLC17A7,RPS27A,CTLA4,CEBPB	13.2454	23	1.73645	0.00291727	0.00688446
VIT	CTLA4	FOXP1,IRF4,IKZF1,ETS1,FLI1,CTLA4	0.8	6	7.5	4.20081e-06	2.37222e-05
VIT	IFNG	H2AFZ,RNASET2,CD44,STAT4,CEBPB	3.64459	5	1.3719	0.158646	0.192785
VIT	TNF	DNAJB14,IRF4,BACH2,DDC,IKZF1,SLC37A3,RAB19,CD44,FERMT3,CCDC88B,ETS1,ANKRD52,RAB5B,SLC17A7,CEBPB	9.18246	15	1.63355	0.0208903	0.0344773
VIT	Proliferation	POLR3H,PHF5A,FOXP1,CEP19,N4BP2,RHOH,IRF4,WRNIP1,CCDC88B,TRMT112,DGKA,PA2G4,ENO1,RPS11,PNPT1	13.2055	15	1.13589	0.245192	0.273703
MS	IL2RA	IKZF1,MYC,ETS1,FOXO1	0.902222	4	4.4335	0.00147572	0.00404769
MS	IL2	EOMES,ARAP3,PCDH12,BACH2,CASP8AP2,IKZF1,ZPBP,MYC,PLCH2,TTC34,RPS24,CD5,CD6,PRPF19,CCDC88B,FERMT3,BCL9L,ETS1,KLRB1,PITPNM2,SLC25A15,GPR18,ZFP36L1,C15orf53,RASGRP1,GPR108,TTF2,CD28,CTLA4,ICOS,SLAMF1,SLAMF6,ARFRP1,HELZ2,LIME1,PRPF6,RTEL1,CD244	14.1624	38	2.68316	2.70455e-09	5.19274e-08
MS	CTLA4	SATB1,IKZF1,MYC,ETS1,FOXO1,STAT3,CTLA4	1.12	7	6.25	5.17345e-06	2.61395e-05
MS	IFNG	MYC,RER1,BCL9L,STAT4,CD28,SLAMF1,HELZ2	3.95779	7	1.76866	0.0455086	0.0672127
MS	TNF	BACH2,MDN1,IKZF1,MYC,RER1,TNFRSF14,RPS24,CCDC88B,FERMT3,ETS1,PITPNM2,GPR18,C15orf53,RASGRP1,STAT3,CD28,GMEB2,LIME1,CD244,ITLN1	9.97158	20	2.0057	0.000916733	0.00283892
MS	Proliferation	BRIX1,RAD1,MDN1,ELMO1,MYC,TNFRSF14,RPS24,CD5,CCDC88B,DDX6,MPHOSPH9,TMED2,FOXO1,TMED10,RASGRP1,SOCS1,STAT3,THADA,REL,CD28,OPRL1,SAMD10	14.2213	22	1.54698	0.0139913	0.0248735
ATD	IL2RA	BCL6,IL15RA,IL2RA	0.171852	3	17.4569	3.07929e-06	1.84757e-05
ATD	IL2	BACH2,IL2RA,RBM17	0.713215	3	4.20631	0.00291992	0.00688446
ATD	CTLA4		0.213333	0	0	0.197067	0.2256
ATD	IFNG		0.199313	0	0	0.1831	0.214361
ATD	TNF	BACH2	0.502166	1	1.99137	0.0848247	0.11155
ATD	Proliferation	LPP,RBM17	0.711063	2	2.81269	0.026768	0.0421267
ECZ	IL2RA	DDX39B,ETS1	1.24593	2	1.60523	0.124889	0.156703
ECZ	IL2	IL2,KIAA1109,PRRC2A,CSNK2B,BTNL2,ETS1,BAZ1A,PSMA6,PAPOLG,VAX2,CD207,FIGLA,LIME1,PRPF6,RTEL1,SOX18,ARFRP1	12.4303	17	1.36762	0.0694168	0.0952002
ECZ	CTLA4	IL2,SKIV2L,EGR2,ETS1,FLI1,IL1R1	1.54667	6	3.87931	0.000556427	0.00178057
ECZ	IFNG	LTA,IL1R1,SOX18	3.47375	3	0.863621	0.459486	0.474309
ECZ	TNF	LTA,NCR3,TNF,HLA-DQB1,ETS1,FIGLA,LIME1,SOX18,GMEB2	8.75203	9	1.02833	0.37852	0.408291
ECZ	Proliferation	KIAA1109,EXOSC9,SPATA5,BRIX1,RAD1,CSNK2B,LSM2,VARS,NOTCH4,EGR2,NFKBIA,PSMA6,SOCS1,MAP4K4,ATP8B2,OPRL1,SAMD10	12.1897	17	1.39462	0.0594563	0.0827219
