# Supplementary material for: Dynamic chromatin architecture identifies new autoimmune-associated enhancers for IL2 and novel genes regulating CD4+ T cell activation
Source: eLife. 2024 Sep 20;13:RP96852. doi: 10.7554/eLife.96852 (PMC11418197; doi:10.7554/eLife.96852)
Supplement: Supplementary file 19. [file elife-96852-supp19.xlsx]

## Sheet: summary
Table S19: V2G target gene drug repurposing results
SearchTerm	Gene	GeneName	DistinctDrugCount	DruggableGeneCategories
EHMT2	EHMT2	EUCHROMATIC HISTONE LYSINE METHYLTRANSFERASE 2	864	DRUGGABLE GENOME,METHYL TRANSFERASE,ENZYME
ATXN2	ATXN2	ATAXIN 2	252	NA
SMAD3	SMAD3	SMAD FAMILY MEMBER 3	226	TRANSCRIPTION FACTOR COMPLEX,KINASE,TRANSCRIPTION FACTOR BINDING,DRUGGABLE GENOME,CLINICALLY ACTIONABLE
FEN1	FEN1	FLAP STRUCTURE-SPECIFIC ENDONUCLEASE 1	199	DNA REPAIR,DRUGGABLE GENOME,ENZYME
ERBB2	ERBB2	ERB-B2 RECEPTOR TYROSINE KINASE 2	151	KINASE,TYROSINE KINASE,DRUG RESISTANCE,DRUGGABLE GENOME,CLINICALLY ACTIONABLE
HIF1A	HIF1A	HYPOXIA INDUCIBLE FACTOR 1 ALPHA SUBUNIT	137	TRANSCRIPTION FACTOR COMPLEX,TRANSPORTER,TRANSCRIPTION FACTOR BINDING,DRUGGABLE GENOME,ENZYME,TRANSCRIPTION FACTOR
BLM	BLM	BLOOM SYNDROME RECQ LIKE HELICASE	100	DNA REPAIR,DRUGGABLE GENOME,CLINICALLY ACTIONABLE,ENZYME
NFKB1	NFKB1	NUCLEAR FACTOR KAPPA B SUBUNIT 1	90	KINASE,TRANSCRIPTION FACTOR BINDING,DRUGGABLE GENOME,TRANSCRIPTION FACTOR
RORC	RORC	RAR RELATED ORPHAN RECEPTOR C	90	NUCLEAR HORMONE RECEPTOR,DRUGGABLE GENOME,TRANSCRIPTION FACTOR
TOP2A	TOP2A	DNA TOPOISOMERASE II ALPHA	80	DRUGGABLE GENOME,CLINICALLY ACTIONABLE,ENZYME
CDK2	CDK2	CYCLIN DEPENDENT KINASE 2	69	DNA REPAIR,KINASE,SERINE THREONINE KINASE,DRUGGABLE GENOME,CLINICALLY ACTIONABLE,ENZYME
TNF	TNF	TUMOR NECROSIS FACTOR	68	CELL SURFACE,EXTERNAL SIDE OF PLASMA MEMBRANE,DRUGGABLE GENOME
RELA	RELA	RELA PROTO-ONCOGENE, NF-KB SUBUNIT	51	TRANSCRIPTION FACTOR COMPLEX,KINASE,DRUG RESISTANCE,TRANSCRIPTION FACTOR BINDING,DRUGGABLE GENOME,CLINICALLY ACTIONABLE,TRANSCRIPTION FACTOR
BAX	BAX	BCL2 ASSOCIATED X, APOPTOSIS REGULATOR	48	DRUGGABLE GENOME
MYC	MYC	MYC PROTO-ONCOGENE, BHLH TRANSCRIPTION FACTOR	41	DRUG RESISTANCE,TRANSCRIPTION FACTOR BINDING,CLINICALLY ACTIONABLE,TRANSCRIPTION FACTOR
NFKB2	NFKB2	NUCLEAR FACTOR KAPPA B SUBUNIT 2	40	KINASE,DRUGGABLE GENOME,CLINICALLY ACTIONABLE,TRANSCRIPTION FACTOR
HSP90AB1	HSP90AB1	HEAT SHOCK PROTEIN 90 ALPHA FAMILY CLASS B MEMBER 1	38	DRUGGABLE GENOME,CLINICALLY ACTIONABLE,TRANSCRIPTION FACTOR
HDAC7	HDAC7	HISTONE DEACETYLASE 7	37	DRUGGABLE GENOME,CLINICALLY ACTIONABLE,ENZYME,TRANSCRIPTION FACTOR
MAP4K4	MAP4K4	MITOGEN-ACTIVATED PROTEIN KINASE KINASE KINASE KINASE 4	37	KINASE,SERINE THREONINE KINASE,DRUGGABLE GENOME,ENZYME
GNAS	GNAS	GNAS COMPLEX LOCUS	36	TRANSPORTER,DRUG RESISTANCE,G PROTEIN COUPLED RECEPTOR,DRUGGABLE GENOME,CLINICALLY ACTIONABLE
PIK3R2	PIK3R2	PHOSPHOINOSITIDE-3-KINASE REGULATORY SUBUNIT 2	36	KINASE,DRUG RESISTANCE,PHOSPHATIDYLINOSITOL 3 KINASE,CLINICALLY ACTIONABLE,ENZYME
RUNX1	RUNX1	RUNT RELATED TRANSCRIPTION FACTOR 1	35	DRUG RESISTANCE,CLINICALLY ACTIONABLE,TRANSCRIPTION FACTOR
RAPGEF3	RAPGEF3	RAP GUANINE NUCLEOTIDE EXCHANGE FACTOR 3	33	ENZYME
IL2	IL2	INTERLEUKIN 2	32	GROWTH FACTOR,DRUGGABLE GENOME,CLINICALLY ACTIONABLE
RARA	RARA	RETINOIC ACID RECEPTOR ALPHA	31	CELL SURFACE,TRANSCRIPTION FACTOR BINDING,NUCLEAR HORMONE RECEPTOR,DRUGGABLE GENOME,CLINICALLY ACTIONABLE
TYK2	TYK2	TYROSINE KINASE 2	31	KINASE,TYROSINE KINASE,DRUGGABLE GENOME,CLINICALLY ACTIONABLE,ENZYME
ERBB3	ERBB3	ERB-B2 RECEPTOR TYROSINE KINASE 3	30	KINASE,TYROSINE KINASE,DRUG RESISTANCE,DRUGGABLE GENOME,CLINICALLY ACTIONABLE,ENZYME
MINK1	MINK1	MISSHAPEN LIKE KINASE 1	29	KINASE,SERINE THREONINE KINASE,DRUGGABLE GENOME,ENZYME
IL2RA	IL2RA	INTERLEUKIN 2 RECEPTOR SUBUNIT ALPHA	28	EXTERNAL SIDE OF PLASMA MEMBRANE,DRUGGABLE GENOME
PLAU	PLAU	PLASMINOGEN ACTIVATOR, UROKINASE	26	CELL SURFACE,PROTEASE,DRUGGABLE GENOME,ENZYME
GRIN3B	GRIN3B	GLUTAMATE IONOTROPIC RECEPTOR NMDA TYPE SUBUNIT 3B	24	ION CHANNEL,DRUGGABLE GENOME
PTPN1	PTPN1	PROTEIN TYROSINE PHOSPHATASE, NON-RECEPTOR TYPE 1	24	PROTEIN PHOSPHATASE,KINASE,DRUGGABLE GENOME,ENZYME
STAT3	STAT3	SIGNAL TRANSDUCER AND ACTIVATOR OF TRANSCRIPTION 3	23	TRANSCRIPTION FACTOR COMPLEX,TUMOR SUPPRESSOR,KINASE,TRANSCRIPTION FACTOR BINDING,NUCLEAR HORMONE RECEPTOR,DRUGGABLE GENOME,CLINICALLY ACTIONABLE
STK11	STK11	SERINE/THREONINE KINASE 11	23	KINASE,SERINE THREONINE KINASE,DRUG RESISTANCE,DRUGGABLE GENOME,CLINICALLY ACTIONABLE,ENZYME
CAMK2G	CAMK2G	CALCIUM/CALMODULIN DEPENDENT PROTEIN KINASE II GAMMA	19	KINASE,SERINE THREONINE KINASE,DRUGGABLE GENOME,ENZYME
CTDSP1	CTDSP1	CTD SMALL PHOSPHATASE 1	19	PROTEIN PHOSPHATASE,DRUGGABLE GENOME
CDK6	CDK6	CYCLIN DEPENDENT KINASE 6	18	TUMOR SUPPRESSOR,KINASE,SERINE THREONINE KINASE,DRUG RESISTANCE,DRUGGABLE GENOME,CLINICALLY ACTIONABLE,ENZYME
CDKN1A	CDKN1A	CYCLIN DEPENDENT KINASE INHIBITOR 1A	18	KINASE,DRUG RESISTANCE,DRUGGABLE GENOME,CLINICALLY ACTIONABLE
CTLA4	CTLA4	CYTOTOXIC T-LYMPHOCYTE ASSOCIATED PROTEIN 4	18	EXTERNAL SIDE OF PLASMA MEMBRANE,DRUGGABLE GENOME,CLINICALLY ACTIONABLE
PTGDR2	PTGDR2	PROSTAGLANDIN D2 RECEPTOR 2	18	KINASE,G PROTEIN COUPLED RECEPTOR,DRUGGABLE GENOME
PTGER4	PTGER4	PROSTAGLANDIN E RECEPTOR 4	18	KINASE,G PROTEIN COUPLED RECEPTOR,DRUGGABLE GENOME
TG	TG	THYROGLOBULIN	18	HORMONE ACTIVITY,DRUGGABLE GENOME
IL10	IL10	INTERLEUKIN 10	17	GROWTH FACTOR,DRUG RESISTANCE,DRUGGABLE GENOME,CLINICALLY ACTIONABLE
CHRNB2	CHRNB2	CHOLINERGIC RECEPTOR NICOTINIC BETA 2 SUBUNIT	16	ION CHANNEL,EXTERNAL SIDE OF PLASMA MEMBRANE,DRUGGABLE GENOME
SENP7	SENP7	SUMO1/SENTRIN SPECIFIC PEPTIDASE 7	16	PROTEASE,DRUGGABLE GENOME,ENZYME
CCR5	CCR5	C-C MOTIF CHEMOKINE RECEPTOR 5 (GENE/PSEUDOGENE)	15	CELL SURFACE,G PROTEIN COUPLED RECEPTOR,EXTERNAL SIDE OF PLASMA MEMBRANE,DRUGGABLE GENOME
GAPDH	GAPDH	GLYCERALDEHYDE-3-PHOSPHATE DEHYDROGENASE	15	DRUGGABLE GENOME,ENZYME
NQO2	NQO2	N-RIBOSYLDIHYDRONICOTINAMIDE:QUINONE REDUCTASE 2	15	DRUGGABLE GENOME,ENZYME
PRKCB	PRKCB	PROTEIN KINASE C BETA	15	TRANSPORTER,KINASE,SERINE THREONINE KINASE,DRUGGABLE GENOME,CLINICALLY ACTIONABLE,ENZYME
IGF2	IGF2	INSULIN LIKE GROWTH FACTOR 2	14	GROWTH FACTOR,HORMONE ACTIVITY,DRUGGABLE GENOME,CLINICALLY ACTIONABLE,TRANSCRIPTION FACTOR
KCNJ1	KCNJ1	POTASSIUM VOLTAGE-GATED CHANNEL SUBFAMILY J MEMBER 1	14	ION CHANNEL,DRUGGABLE GENOME
PDCD1	PDCD1	PROGRAMMED CELL DEATH 1	14	ION CHANNEL,EXTERNAL SIDE OF PLASMA MEMBRANE,DRUGGABLE GENOME,CLINICALLY ACTIONABLE
SLC29A1	SLC29A1	SOLUTE CARRIER FAMILY 29 MEMBER 1 (AUGUSTINE BLOOD GROUP)	14	TRANSPORTER,EXTERNAL SIDE OF PLASMA MEMBRANE,DRUGGABLE GENOME
ATG4B	ATG4B	AUTOPHAGY RELATED 4B CYSTEINE PEPTIDASE	13	PROTEASE,DRUGGABLE GENOME,ENZYME
CA14	CA14	CARBONIC ANHYDRASE 14	12	DRUGGABLE GENOME,ENZYME
HLA-DQB1	HLA-DQB1	MAJOR HISTOCOMPATIBILITY COMPLEX, CLASS II, DQ BETA 1	12	NA
IFNAR2	IFNAR2	INTERFERON ALPHA AND BETA RECEPTOR SUBUNIT 2	12	KINASE,DRUGGABLE GENOME
PTPRC	PTPRC	PROTEIN TYROSINE PHOSPHATASE, RECEPTOR TYPE C	12	PROTEIN PHOSPHATASE,CELL SURFACE,TUMOR SUPPRESSOR,KINASE,EXTERNAL SIDE OF PLASMA MEMBRANE,DRUGGABLE GENOME,CLINICALLY ACTIONABLE
SSTR3	SSTR3	SOMATOSTATIN RECEPTOR 3	12	KINASE,G PROTEIN COUPLED RECEPTOR,DRUGGABLE GENOME
CCR2	CCR2	C-C MOTIF CHEMOKINE RECEPTOR 2	11	G PROTEIN COUPLED RECEPTOR,EXTERNAL SIDE OF PLASMA MEMBRANE,DRUGGABLE GENOME
LIF	LIF	LIF, INTERLEUKIN 6 FAMILY CYTOKINE	11	GROWTH FACTOR,DRUGGABLE GENOME
MPI	MPI	MANNOSE PHOSPHATE ISOMERASE	11	DRUGGABLE GENOME,ENZYME
VKORC1	VKORC1	VITAMIN K EPOXIDE REDUCTASE COMPLEX SUBUNIT 1	11	DRUGGABLE GENOME,DRUG METABOLISM,ENZYME
APH1A	APH1A	APH-1 HOMOLOG A, GAMMA-SECRETASE SUBUNIT	10	DRUGGABLE GENOME,CLINICALLY ACTIONABLE
PRKCH	PRKCH	PROTEIN KINASE C ETA	10	KINASE,SERINE THREONINE KINASE,DRUGGABLE GENOME,ENZYME
ELANE	ELANE	ELASTASE, NEUTROPHIL EXPRESSED	9	CELL SURFACE,PROTEASE,DRUGGABLE GENOME,ENZYME
IL6R	IL6R	INTERLEUKIN 6 RECEPTOR	9	EXTERNAL SIDE OF PLASMA MEMBRANE,DRUGGABLE GENOME
NFKBIA	NFKBIA	NFKB INHIBITOR ALPHA	9	TRANSCRIPTION FACTOR BINDING,DRUGGABLE GENOME,CLINICALLY ACTIONABLE
OPRL1	OPRL1	OPIOID RELATED NOCICEPTIN RECEPTOR 1	9	KINASE,G PROTEIN COUPLED RECEPTOR,DRUGGABLE GENOME
CFL1	CFL1	COFILIN 1	8	KINASE
PSMB8	PSMB8	PROTEASOME SUBUNIT BETA 8	8	PROTEASE,DRUGGABLE GENOME,ENZYME
PTK6	PTK6	PROTEIN TYROSINE KINASE 6	8	KINASE,TYROSINE KINASE,DRUGGABLE GENOME,ENZYME,TRANSCRIPTION FACTOR
RAC1	RAC1	RAC FAMILY SMALL GTPASE 1	8	KINASE,DRUG RESISTANCE,CLINICALLY ACTIONABLE
S1PR5	S1PR5	SPHINGOSINE-1-PHOSPHATE RECEPTOR 5	8	G PROTEIN COUPLED RECEPTOR,DRUGGABLE GENOME
SRMS	SRMS	SRC-RELATED KINASE LACKING C-TERMINAL REGULATORY TYROSINE AND N-TERMINAL MYRISTYLATION SITES	8	KINASE,TYROSINE KINASE,DRUGGABLE GENOME,ENZYME
ESRRA	ESRRA	ESTROGEN RELATED RECEPTOR ALPHA	7	NUCLEAR HORMONE RECEPTOR,DRUGGABLE GENOME
IL5	IL5	INTERLEUKIN 5	7	GROWTH FACTOR,DRUGGABLE GENOME
CD28	CD28	CD28 MOLECULE	6	CELL SURFACE,KINASE,EXTERNAL SIDE OF PLASMA MEMBRANE,DRUGGABLE GENOME
CDH1	CDH1	CADHERIN 1	6	DRUG RESISTANCE,DRUGGABLE GENOME,CLINICALLY ACTIONABLE
ERAP1	ERAP1	ENDOPLASMIC RETICULUM AMINOPEPTIDASE 1	6	PROTEASE,DRUGGABLE GENOME,ENZYME
HLA-DRA	HLA-DRA	MAJOR HISTOCOMPATIBILITY COMPLEX, CLASS II, DR ALPHA	6	CELL SURFACE,DRUGGABLE GENOME
IKZF1	IKZF1	IKAROS FAMILY ZINC FINGER 1	6	CLINICALLY ACTIONABLE,TRANSCRIPTION FACTOR
IL1R1	IL1R1	INTERLEUKIN 1 RECEPTOR TYPE 1	6	EXTERNAL SIDE OF PLASMA MEMBRANE,DRUGGABLE GENOME
IL23A	IL23A	INTERLEUKIN 23 SUBUNIT ALPHA	6	DRUGGABLE GENOME
ITGA4	ITGA4	INTEGRIN SUBUNIT ALPHA 4	6	CELL SURFACE,DRUGGABLE GENOME
MAPKAPK2	MAPKAPK2	MITOGEN-ACTIVATED PROTEIN KINASE-ACTIVATED PROTEIN KINASE 2	6	KINASE,SERINE THREONINE KINASE,DRUGGABLE GENOME,ENZYME
PSMB9	PSMB9	PROTEASOME SUBUNIT BETA 9	6	PROTEASE,DRUGGABLE GENOME,ENZYME
ATP5D	ATP5F1D	ATP SYNTHASE F1 SUBUNIT DELTA	5	TRANSPORTER
CASP8	CASP8	CASPASE 8	5	PROTEASE,DRUGGABLE GENOME,CLINICALLY ACTIONABLE,ENZYME
DNMT3A	DNMT3A	DNA METHYLTRANSFERASE 3 ALPHA	5	DRUG RESISTANCE,TRANSCRIPTION FACTOR BINDING,DRUGGABLE GENOME,CLINICALLY ACTIONABLE,ENZYME
FES	FES	FES PROTO-ONCOGENE, TYROSINE KINASE	5	KINASE,TYROSINE KINASE,DRUGGABLE GENOME,ENZYME
GPBAR1	GPBAR1	G PROTEIN-COUPLED BILE ACID RECEPTOR 1	5	KINASE,G PROTEIN COUPLED RECEPTOR,DRUGGABLE GENOME,ENZYME
ICAM1	ICAM1	INTERCELLULAR ADHESION MOLECULE 1	5	CELL SURFACE,DRUG RESISTANCE,EXTERNAL SIDE OF PLASMA MEMBRANE,DRUGGABLE GENOME
IL2RB	IL2RB	INTERLEUKIN 2 RECEPTOR SUBUNIT BETA	5	CELL SURFACE,EXTERNAL SIDE OF PLASMA MEMBRANE,DRUGGABLE GENOME
PSMA6	PSMA6	PROTEASOME SUBUNIT ALPHA 6	5	PROTEASE,DRUGGABLE GENOME
SAG	SAG	S-ANTIGEN VISUAL ARRESTIN	5	NA
ATP1B3	ATP1B3	ATPASE NA+/K+ TRANSPORTING SUBUNIT BETA 3	4	TRANSPORTER,DRUGGABLE GENOME,ENZYME
CAST	CAST	CALPASTATIN	4	PROTEASE INHIBITOR
CATSPER1	CATSPER1	CATION CHANNEL SPERM ASSOCIATED 1	4	ION CHANNEL,DRUGGABLE GENOME
CD5	CD5	CD5 MOLECULE	4	EXTERNAL SIDE OF PLASMA MEMBRANE,DRUGGABLE GENOME
CYP27B1	CYP27B1	CYTOCHROME P450 FAMILY 27 SUBFAMILY B MEMBER 1	4	DRUGGABLE GENOME,CYTOCHROME P450,ENZYME
DDC	DDC	DOPA DECARBOXYLASE	4	DRUGGABLE GENOME,ENZYME
DTYMK	DTYMK	DEOXYTHYMIDYLATE KINASE	4	KINASE
HLA-DQA1	HLA-DQA1	MAJOR HISTOCOMPATIBILITY COMPLEX, CLASS II, DQ ALPHA 1	4	NA
HLA-E	HLA-E	MAJOR HISTOCOMPATIBILITY COMPLEX, CLASS I, E	4	CELL SURFACE,EXTERNAL SIDE OF PLASMA MEMBRANE
LTA	LTA	LYMPHOTOXIN ALPHA	4	DRUG RESISTANCE,DRUGGABLE GENOME
NOTCH4	NOTCH4	NOTCH 4	4	CELL SURFACE,DRUGGABLE GENOME,CLINICALLY ACTIONABLE
PDGFB	PDGFB	PLATELET DERIVED GROWTH FACTOR SUBUNIT B	4	CELL SURFACE,KINASE,GROWTH FACTOR,DRUGGABLE GENOME,CLINICALLY ACTIONABLE
POU5F1	POU5F1	POU CLASS 5 HOMEOBOX 1	4	CLINICALLY ACTIONABLE,TRANSCRIPTION FACTOR
PPP3CA	PPP3CA	PROTEIN PHOSPHATASE 3 CATALYTIC SUBUNIT ALPHA	4	DRUGGABLE GENOME,ENZYME,TRANSCRIPTION FACTOR
PSMD1	PSMD1	PROTEASOME 26S SUBUNIT, NON-ATPASE 1	4	NA
PSORS1C1	PSORS1C1	PSORIASIS SUSCEPTIBILITY 1 CANDIDATE 1	4	NA
RORA	RORA	RAR RELATED ORPHAN RECEPTOR A	4	KINASE,TRANSCRIPTION FACTOR BINDING,NUCLEAR HORMONE RECEPTOR,DRUGGABLE GENOME
SCNN1A	SCNN1A	SODIUM CHANNEL EPITHELIAL 1 ALPHA SUBUNIT	4	ION CHANNEL,DRUGGABLE GENOME
SLC22A11	SLC22A11	SOLUTE CARRIER FAMILY 22 MEMBER 11	4	TRANSPORTER,EXTERNAL SIDE OF PLASMA MEMBRANE,DRUGGABLE GENOME
TNFRSF1A	TNFRSF1A	TNF RECEPTOR SUPERFAMILY MEMBER 1A	4	CELL SURFACE,DRUGGABLE GENOME
TNFSF11	TNFSF11	TNF SUPERFAMILY MEMBER 11	4	KINASE,DRUGGABLE GENOME
TXK	TXK	TXK TYROSINE KINASE	4	KINASE,TYROSINE KINASE,DRUGGABLE GENOME,ENZYME,TRANSCRIPTION FACTOR
C3	C3	COMPLEMENT C3	3	CELL SURFACE,PROTEASE INHIBITOR,DRUGGABLE GENOME
CCND3	CCND3	CYCLIN D3	3	KINASE,DRUGGABLE GENOME,CLINICALLY ACTIONABLE,TRANSCRIPTION FACTOR
CCR4	CCR4	C-C MOTIF CHEMOKINE RECEPTOR 4	3	G PROTEIN COUPLED RECEPTOR,EXTERNAL SIDE OF PLASMA MEMBRANE,DRUGGABLE GENOME
CD247	CD247	CD247 MOLECULE	3	KINASE,DRUGGABLE GENOME,ENZYME
CD44	CD44	CD44 MOLECULE (INDIAN BLOOD GROUP)	3	CELL SURFACE,DRUGGABLE GENOME
CSK	CSK	C-TERMINAL SRC KINASE	3	KINASE,TYROSINE KINASE,DRUGGABLE GENOME,ENZYME
DUSP1	DUSP1	DUAL SPECIFICITY PHOSPHATASE 1	3	PROTEIN PHOSPHATASE,KINASE,DRUGGABLE GENOME
ERAP2	ERAP2	ENDOPLASMIC RETICULUM AMINOPEPTIDASE 2	3	NEUTRAL ZINC METALLOPEPTIDASE,PROTEASE,DRUGGABLE GENOME,ENZYME
FOXO1	FOXO1	FORKHEAD BOX O1	3	CLINICALLY ACTIONABLE,TRANSCRIPTION FACTOR
GAK	GAK	CYCLIN G ASSOCIATED KINASE	3	KINASE,SERINE THREONINE KINASE,DRUGGABLE GENOME,ENZYME
GART	GART	PHOSPHORIBOSYLGLYCINAMIDE FORMYLTRANSFERASE, PHOSPHORIBOSYLGLYCINAMIDE SYNTHETASE, PHOSPHORIBOSYLAMINOIMIDAZOLE SYNTHETASE	3	DRUGGABLE GENOME,ENZYME
GPA33	GPA33	GLYCOPROTEIN A33	3	DRUGGABLE GENOME
GPR18	GPR18	G PROTEIN-COUPLED RECEPTOR 18	3	G PROTEIN COUPLED RECEPTOR,DRUGGABLE GENOME
IL6ST	IL6ST	INTERLEUKIN 6 SIGNAL TRANSDUCER	3	KINASE,EXTERNAL SIDE OF PLASMA MEMBRANE,DRUGGABLE GENOME,CLINICALLY ACTIONABLE
KEAP1	KEAP1	KELCH LIKE ECH ASSOCIATED PROTEIN 1	3	TRANSCRIPTION FACTOR BINDING,DRUGGABLE GENOME,CLINICALLY ACTIONABLE,ENZYME
KISS1R	KISS1R	KISS1 RECEPTOR	3	TRANSPORTER,CELL SURFACE,G PROTEIN COUPLED RECEPTOR,DRUGGABLE GENOME
NDUFS2	NDUFS2	NADH:UBIQUINONE OXIDOREDUCTASE CORE SUBUNIT S2	3	ENZYME
PERP	PERP	PERP, TP53 APOPTOSIS EFFECTOR	3	NA
PRLR	PRLR	PROLACTIN RECEPTOR	3	CELL SURFACE,KINASE,EXTERNAL SIDE OF PLASMA MEMBRANE,DRUGGABLE GENOME
PRRC2A	PRRC2A	PROLINE RICH COILED-COIL 2A	3	NA
RIPK1	RIPK1	RECEPTOR INTERACTING SERINE/THREONINE KINASE 1	3	KINASE,SERINE THREONINE KINASE,DRUGGABLE GENOME,ENZYME
STAT4	STAT4	SIGNAL TRANSDUCER AND ACTIVATOR OF TRANSCRIPTION 4	3	KINASE,CLINICALLY ACTIONABLE,TRANSCRIPTION FACTOR
STAT5B	STAT5B	SIGNAL TRANSDUCER AND ACTIVATOR OF TRANSCRIPTION 5B	3	KINASE,DRUGGABLE GENOME,CLINICALLY ACTIONABLE,TRANSCRIPTION FACTOR
TNFRSF4	TNFRSF4	TNF RECEPTOR SUPERFAMILY MEMBER 4	3	CELL SURFACE,EXTERNAL SIDE OF PLASMA MEMBRANE,DRUGGABLE GENOME
TRAF1	TRAF1	TNF RECEPTOR ASSOCIATED FACTOR 1	3	NA
ZEB1	ZEB1	ZINC FINGER E-BOX BINDING HOMEOBOX 1	3	DRUG RESISTANCE,TRANSCRIPTION FACTOR
ARID5B	ARID5B	AT-RICH INTERACTION DOMAIN 5B	2	CLINICALLY ACTIONABLE
BAD	BAD	BCL2 ASSOCIATED AGONIST OF CELL DEATH	2	KINASE,DRUG RESISTANCE,DRUGGABLE GENOME
BCL2L11	BCL2L11	BCL2 LIKE 11	2	DRUG RESISTANCE,CLINICALLY ACTIONABLE,TRANSCRIPTION FACTOR
BCL6	BCL6	B-CELL CLL/LYMPHOMA 6	2	CLINICALLY ACTIONABLE,TRANSCRIPTION FACTOR
CCR6	CCR6	C-C MOTIF CHEMOKINE RECEPTOR 6	2	CELL SURFACE,G PROTEIN COUPLED RECEPTOR,EXTERNAL SIDE OF PLASMA MEMBRANE,DRUGGABLE GENOME
CD6	CD6	CD6 MOLECULE	2	KINASE,EXTERNAL SIDE OF PLASMA MEMBRANE,DRUGGABLE GENOME
CD69	CD69	CD69 MOLECULE	2	EXTERNAL SIDE OF PLASMA MEMBRANE,DRUGGABLE GENOME
CDC37	CDC37	CELL DIVISION CYCLE 37	2	KINASE
CH25H	CH25H	CHOLESTEROL 25-HYDROXYLASE	2	ENZYME
CLK3	CLK3	CDC LIKE KINASE 3	2	KINASE,SERINE THREONINE KINASE,TYROSINE KINASE,DRUGGABLE GENOME,ENZYME
CYP11A1	CYP11A1	CYTOCHROME P450 FAMILY 11 SUBFAMILY A MEMBER 1	2	DRUGGABLE GENOME,CYTOCHROME P450,ENZYME
F12	F12	COAGULATION FACTOR XII	2	PROTEASE,DRUGGABLE GENOME,ENZYME
GJD4	GJD4	GAP JUNCTION PROTEIN DELTA 4	2	ION CHANNEL
ICOS	ICOS	INDUCIBLE T-CELL COSTIMULATOR	2	DRUGGABLE GENOME
IL15RA	IL15RA	INTERLEUKIN 15 RECEPTOR SUBUNIT ALPHA	2	CELL SURFACE,DRUGGABLE GENOME
ILF3	ILF3	INTERLEUKIN ENHANCER BINDING FACTOR 3	2	KINASE,TRANSCRIPTION FACTOR
INPP5D	INPP5D	INOSITOL POLYPHOSPHATE-5-PHOSPHATASE D	2	KINASE,DRUGGABLE GENOME,CLINICALLY ACTIONABLE,ENZYME
LTB	LTB	LYMPHOTOXIN BETA	2	DRUGGABLE GENOME
LTBR	LTBR	LYMPHOTOXIN BETA RECEPTOR	2	DRUGGABLE GENOME
OXER1	OXER1	OXOEICOSANOID RECEPTOR 1	2	G PROTEIN COUPLED RECEPTOR,DRUGGABLE GENOME
PAK2	PAK2	P21 (RAC1) ACTIVATED KINASE 2	2	KINASE,SERINE THREONINE KINASE,DRUGGABLE GENOME,ENZYME
PNOC	PNOC	PREPRONOCICEPTIN	2	DRUGGABLE GENOME
PPP1R1B	PPP1R1B	PROTEIN PHOSPHATASE 1 REGULATORY INHIBITOR SUBUNIT 1B	2	KINASE
PSMD5	PSMD5	PROTEASOME 26S SUBUNIT, NON-ATPASE 5	2	NA
PSME4	PSME4	PROTEASOME ACTIVATOR SUBUNIT 4	2	DNA REPAIR
RAC2	RAC2	RAC FAMILY SMALL GTPASE 2	2	NA
RASGRP1	RASGRP1	RAS GUANYL RELEASING PROTEIN 1	2	KINASE
RPS6KA4	RPS6KA4	RIBOSOMAL PROTEIN S6 KINASE A4	2	KINASE,SERINE THREONINE KINASE,DRUGGABLE GENOME,CLINICALLY ACTIONABLE,ENZYME,TRANSCRIPTION FACTOR
RUNX3	RUNX3	RUNT RELATED TRANSCRIPTION FACTOR 3	2	TRANSCRIPTION FACTOR
SCNN1D	SCNN1D	SODIUM CHANNEL EPITHELIAL 1 DELTA SUBUNIT	2	ION CHANNEL,DRUGGABLE GENOME
SH2B3	SH2B3	SH2B ADAPTOR PROTEIN 3	2	KINASE,CLINICALLY ACTIONABLE
SIK1	SIK1	SALT INDUCIBLE KINASE 1	2	KINASE,SERINE THREONINE KINASE,DRUGGABLE GENOME,ENZYME
SLC1A2	SLC1A2	SOLUTE CARRIER FAMILY 1 MEMBER 2	2	TRANSPORTER,CELL SURFACE,DRUGGABLE GENOME,CLINICALLY ACTIONABLE
SLC22A5	SLC22A5	SOLUTE CARRIER FAMILY 22 MEMBER 5	2	TRANSPORTER,EXTERNAL SIDE OF PLASMA MEMBRANE,DRUGGABLE GENOME
SMAD7	SMAD7	SMAD FAMILY MEMBER 7	2	KINASE
SOCS1	SOCS1	SUPPRESSOR OF CYTOKINE SIGNALING 1	2	KINASE,CLINICALLY ACTIONABLE
STAT5A	STAT5A	SIGNAL TRANSDUCER AND ACTIVATOR OF TRANSCRIPTION 5A	2	KINASE,DRUGGABLE GENOME,CLINICALLY ACTIONABLE,TRANSCRIPTION FACTOR
STK36	STK36	SERINE/THREONINE KINASE 36	2	KINASE,SERINE THREONINE KINASE,TRANSCRIPTION FACTOR BINDING,DRUGGABLE GENOME,ENZYME,TRANSCRIPTION FACTOR
TBC1D1	TBC1D1	TBC1 DOMAIN FAMILY MEMBER 1	2	NA
TNFAIP3	TNFAIP3	TNF ALPHA INDUCED PROTEIN 3	2	KINASE,PROTEASE,CLINICALLY ACTIONABLE,ENZYME
TNFRSF9	TNFRSF9	TNF RECEPTOR SUPERFAMILY MEMBER 9	2	EXTERNAL SIDE OF PLASMA MEMBRANE,DRUGGABLE GENOME
TNFSF4	TNFSF4	TNF SUPERFAMILY MEMBER 4	2	CELL SURFACE,DRUGGABLE GENOME
TRPC3	TRPC3	TRANSIENT RECEPTOR POTENTIAL CATION CHANNEL SUBFAMILY C MEMBER 3	2	TRANSPORTER,KINASE,ION CHANNEL,DRUGGABLE GENOME
ULK3	ULK3	UNC-51 LIKE KINASE 3	2	KINASE,SERINE THREONINE KINASE,DRUGGABLE GENOME,ENZYME
ABHD6	ABHD6	ABHYDROLASE DOMAIN CONTAINING 6	1	PHOSPHOLIPASE,ENZYME
ACYP2	ACYP2	ACYLPHOSPHATASE 2	1	NA
ADO	ADO	2-AMINOETHANETHIOL DIOXYGENASE	1	NA
AL121594.1, KIAA0391	PRORP	PROTEIN ONLY RNASE P CATALYTIC SUBUNIT	1	NA
ARHGAP12	ARHGAP12	RHO GTPASE ACTIVATING PROTEIN 12	1	ENZYME
ATG16L1	ATG16L1	AUTOPHAGY RELATED 16 LIKE 1	1	TRANSPORTER
BAG6	BAG6	BCL2 ASSOCIATED ATHANOGENE 6	1	NA
BAK1	BAK1	BCL2 ANTAGONIST/KILLER 1	1	TUMOR SUPPRESSOR,DRUG RESISTANCE,DRUGGABLE GENOME
C5ORF56	IRF1-AS1	IRF1 ANTISENSE RNA 1	1	NA
CCHCR1	CCHCR1	COILED-COIL ALPHA-HELICAL ROD PROTEIN 1	1	NA
CD244	CD244	CD244 MOLECULE	1	EXTERNAL SIDE OF PLASMA MEMBRANE,DRUGGABLE GENOME
CD27	CD27	CD27 MOLECULE	1	PROTEASE INHIBITOR,EXTERNAL SIDE OF PLASMA MEMBRANE,DRUGGABLE GENOME
CD84	CD84	CD84 MOLECULE	1	DRUGGABLE GENOME
CDC42BPB	CDC42BPB	CDC42 BINDING PROTEIN KINASE BETA	1	KINASE,SERINE THREONINE KINASE,DRUGGABLE GENOME,ENZYME
CDKN2D	CDKN2D	CYCLIN DEPENDENT KINASE INHIBITOR 2D	1	KINASE
CFD	CFD	COMPLEMENT FACTOR D	1	PROTEASE,DRUGGABLE GENOME,ENZYME
CHD1	CHD1	CHROMODOMAIN HELICASE DNA BINDING PROTEIN 1	1	NA
CHD4	CHD4	CHROMODOMAIN HELICASE DNA BINDING PROTEIN 4	1	TRANSCRIPTION FACTOR BINDING,ENZYME
CNGA1	CNGA1	CYCLIC NUCLEOTIDE GATED CHANNEL ALPHA 1	1	TRANSPORTER,ION CHANNEL,DRUGGABLE GENOME
COIL	COIL	COILIN	1	NA
CTSD	CTSD	CATHEPSIN D	1	PROTEASE,DRUGGABLE GENOME,ENZYME
CYTH2	CYTH2	CYTOHESIN 2	1	NA
DAGLB	DAGLB	DIACYLGLYCEROL LIPASE BETA	1	DRUGGABLE GENOME,ENZYME
DBP	DBP	D-BOX BINDING PAR BZIP TRANSCRIPTION FACTOR	1	TRANSCRIPTION FACTOR
FAM177A1	FAM177A1	FAMILY WITH SEQUENCE SIMILARITY 177 MEMBER A1	1	NA
FARP2	FARP2	FERM, ARH/RHOGEF AND PLECKSTRIN DOMAIN PROTEIN 2	1	NA
FASLG	FASLG	FAS LIGAND	1	EXTERNAL SIDE OF PLASMA MEMBRANE,DRUGGABLE GENOME
FCGRT	FCGRT	FC FRAGMENT OF IGG RECEPTOR AND TRANSPORTER	1	EXTERNAL SIDE OF PLASMA MEMBRANE,DRUGGABLE GENOME
FGF1	FGF1	FIBROBLAST GROWTH FACTOR 1	1	GROWTH FACTOR,DRUGGABLE GENOME
FGF21	FGF21	FIBROBLAST GROWTH FACTOR 21	1	TRANSPORTER,GROWTH FACTOR,DRUGGABLE GENOME
FGFR1OP	CEP43	CENTROSOMAL PROTEIN 43	1	CLINICALLY ACTIONABLE
FGFRL1	FGFRL1	FIBROBLAST GROWTH FACTOR RECEPTOR LIKE 1	1	KINASE,DRUGGABLE GENOME
FOSL1	FOSL1	FOS LIKE 1, AP-1 TRANSCRIPTION FACTOR SUBUNIT	1	DRUG RESISTANCE,TRANSCRIPTION FACTOR
FUT2	FUT2	FUCOSYLTRANSFERASE 2	1	DRUGGABLE GENOME,ENZYME
GALC	GALC	GALACTOSYLCERAMIDASE	1	DRUGGABLE GENOME,ENZYME
GPR183	GPR183	G PROTEIN-COUPLED RECEPTOR 183	1	G PROTEIN COUPLED RECEPTOR,DRUGGABLE GENOME
GRK6	GRK6	G PROTEIN-COUPLED RECEPTOR KINASE 6	1	KINASE,SERINE THREONINE KINASE,DRUGGABLE GENOME,ENZYME
HAS3	HAS3	HYALURONAN SYNTHASE 3	1	DRUGGABLE GENOME
HSPA1A	HSPA1A	HEAT SHOCK PROTEIN FAMILY A (HSP70) MEMBER 1A	1	DRUGGABLE GENOME
HSPA1L	HSPA1L	HEAT SHOCK PROTEIN FAMILY A (HSP70) MEMBER 1 LIKE	1	NA
IFNGR2	IFNGR2	INTERFERON GAMMA RECEPTOR 2	1	DRUGGABLE GENOME
IL10RB	IL10RB	INTERLEUKIN 10 RECEPTOR SUBUNIT BETA	1	DRUGGABLE GENOME
IL1R2	IL1R2	INTERLEUKIN 1 RECEPTOR TYPE 2	1	DRUGGABLE GENOME
IL1RL2	IL1RL2	INTERLEUKIN 1 RECEPTOR LIKE 2	1	DRUGGABLE GENOME
IL7R	IL7R	INTERLEUKIN 7 RECEPTOR	1	EXTERNAL SIDE OF PLASMA MEMBRANE,DRUGGABLE GENOME,CLINICALLY ACTIONABLE
ISG15	ISG15	ISG15 UBIQUITIN-LIKE MODIFIER	1	DRUGGABLE GENOME,ENZYME
KAT5	KAT5	LYSINE ACETYLTRANSFERASE 5	1	TRANSCRIPTION FACTOR COMPLEX,ENZYME
KCNJ13	KCNJ13	POTASSIUM VOLTAGE-GATED CHANNEL SUBFAMILY J MEMBER 13	1	TRANSPORTER,ION CHANNEL,DRUGGABLE GENOME
KCNK4	KCNK4	POTASSIUM TWO PORE DOMAIN CHANNEL SUBFAMILY K MEMBER 4	1	ION CHANNEL,DRUGGABLE GENOME
LNPEP	LNPEP	LEUCYL AND CYSTINYL AMINOPEPTIDASE	1	TRANSPORTER,NEUTRAL ZINC METALLOPEPTIDASE,PROTEASE,DRUGGABLE GENOME,ENZYME
LST1	LST1	LEUKOCYTE SPECIFIC TRANSCRIPT 1	1	NA
MAP3K11	MAP3K11	MITOGEN-ACTIVATED PROTEIN KINASE KINASE KINASE 11	1	KINASE,SERINE THREONINE KINASE,DRUGGABLE GENOME,ENZYME
MICB	MICB	MHC CLASS I POLYPEPTIDE-RELATED SEQUENCE B	1	CELL SURFACE,EXTERNAL SIDE OF PLASMA MEMBRANE
NFATC2	NFATC2	NUCLEAR FACTOR OF ACTIVATED T-CELLS 2	1	TRANSCRIPTION FACTOR COMPLEX,DRUG RESISTANCE,TRANSCRIPTION FACTOR BINDING,DRUGGABLE GENOME
OAT	OAT	ORNITHINE AMINOTRANSFERASE	1	DRUGGABLE GENOME,ENZYME
PGC	PGC	PROGASTRICSIN	1	PROTEASE,DRUGGABLE GENOME,ENZYME
PMEL	PMEL	PREMELANOSOME PROTEIN	1	DRUGGABLE GENOME
PMS2	PMS2	PMS1 HOMOLOG 2, MISMATCH REPAIR SYSTEM COMPONENT	1	DRUG RESISTANCE,DRUGGABLE GENOME,CLINICALLY ACTIONABLE
PRDX5	PRDX5	PEROXIREDOXIN 5	1	ENZYME
PVRL4	NECTIN4	NECTIN CELL ADHESION MOLECULE 4	1	DRUGGABLE GENOME
PVT1	PVT1	PVT1 ONCOGENE (NON-PROTEIN CODING)	1	NA
RABGAP1L	RABGAP1L	RAB GTPASE ACTIVATING PROTEIN 1 LIKE	1	NA
RCSD1	RCSD1	RCSD DOMAIN CONTAINING 1	1	NA
RPS6KA2	RPS6KA2	RIBOSOMAL PROTEIN S6 KINASE A2	1	KINASE,SERINE THREONINE KINASE,DRUGGABLE GENOME,ENZYME,TRANSCRIPTION FACTOR
RTKN2	RTKN2	RHOTEKIN 2	1	NA
SDF4	SDF4	STROMAL CELL DERIVED FACTOR 4	1	NA
SF3B2	SF3B2	SPLICING FACTOR 3B SUBUNIT 2	1	NA
SLAMF1	SLAMF1	SIGNALING LYMPHOCYTIC ACTIVATION MOLECULE FAMILY MEMBER 1	1	CELL SURFACE,DRUGGABLE GENOME
SLAMF7	SLAMF7	SLAM FAMILY MEMBER 7	1	DRUGGABLE GENOME
SLC12A5	SLC12A5	SOLUTE CARRIER FAMILY 12 MEMBER 5	1	TRANSPORTER,DRUG RESISTANCE,DRUGGABLE GENOME
SLC39A8	SLC39A8	SOLUTE CARRIER FAMILY 39 MEMBER 8	1	TRANSPORTER
SLC44A4	SLC44A4	SOLUTE CARRIER FAMILY 44 MEMBER 4	1	TRANSPORTER,DRUGGABLE GENOME
SPATA5	SPATA5	SPERMATOGENESIS ASSOCIATED 5	1	NA
STX1B	STX1B	SYNTAXIN 1B	1	NA
TCF19	TCF19	TRANSCRIPTION FACTOR 19	1	TRANSCRIPTION FACTOR
TNFRSF18	TNFRSF18	TNF RECEPTOR SUPERFAMILY MEMBER 18	1	EXTERNAL SIDE OF PLASMA MEMBRANE,DRUGGABLE GENOME
TNNI2	TNNI2	TROPONIN I2, FAST SKELETAL TYPE	1	NA
TNNT3	TNNT3	TROPONIN T3, FAST SKELETAL TYPE	1	NA
UST	UST	URONYL 2-SULFOTRANSFERASE	1	NA
AAMP	AAMP	ANGIO ASSOCIATED MIGRATORY CELL PROTEIN	0	CELL SURFACE
AARS2	AARS2	ALANYL-TRNA SYNTHETASE 2, MITOCHONDRIAL	0	ENZYME
ABCA7	ABCA7	ATP BINDING CASSETTE SUBFAMILY A MEMBER 7	0	TRANSPORTER,CELL SURFACE,EXTERNAL SIDE OF PLASMA MEMBRANE,ABC TRANSPORTER,DRUGGABLE GENOME
ABCB9	ABCB9	ATP BINDING CASSETTE SUBFAMILY B MEMBER 9	0	TRANSPORTER,ABC TRANSPORTER,DRUGGABLE GENOME
ABHD16B	ABHD16B	ABHYDROLASE DOMAIN CONTAINING 16B	0	PHOSPHOLIPASE
ACA64	SNORA78	SMALL NUCLEOLAR RNA, H/ACA BOX 78	0	NA
ACAP3	ACAP3	ARFGAP WITH COILED-COIL, ANKYRIN REPEAT AND PH DOMAINS 3	0	NA
ACO2	ACO2	ACONITASE 2	0	ENZYME
ACOX2	ACOX2	ACYL-COA OXIDASE 2	0	ENZYME
ACPL2	PXYLP1	2-PHOSPHOXYLOSE PHOSPHATASE 1	0	NA
ACTA2-AS1	ACTA2-AS1	ACTA2 ANTISENSE RNA 1	0	NA
ACTR1A	ACTR1A	ARP1 ACTIN RELATED PROTEIN 1 HOMOLOG A	0	NA
ADAM15	ADAM15	ADAM METALLOPEPTIDASE DOMAIN 15	0	CELL SURFACE,KINASE,NEUTRAL ZINC METALLOPEPTIDASE,PROTEASE,DRUGGABLE GENOME,ENZYME
ADAR	ADAR	ADENOSINE DEAMINASE, RNA SPECIFIC	0	ENZYME
ADCY7	ADCY7	ADENYLATE CYCLASE 7	0	KINASE,DRUGGABLE GENOME,ENZYME
ADD2	ADD2	ADDUCIN 2	0	KINASE
AGAP2	AGAP2	ARFGAP WITH GTPASE DOMAIN, ANKYRIN REPEAT AND PH DOMAIN 2	0	KINASE
AGRN	AGRN	AGRIN	0	KINASE,DRUGGABLE GENOME
AGXT2	AGXT2	ALANINE--GLYOXYLATE AMINOTRANSFERASE 2	0	DRUGGABLE GENOME
AIF1	AIF1	ALLOGRAFT INFLAMMATORY FACTOR 1	0	NA
AIMP2	AIMP2	AMINOACYL TRNA SYNTHETASE COMPLEX INTERACTING MULTIFUNCTIONAL PROTEIN 2	0	NA
AIRE	AIRE	AUTOIMMUNE REGULATOR	0	TRANSCRIPTION FACTOR
ALG9	ALG9	ALG9, ALPHA-1,2-MANNOSYLTRANSFERASE	0	ENZYME
ALG9-IT1	ALG9-IT1	ALG9 INTRONIC TRANSCRIPT 1	0	NA
ALS2CR12	FLACC1	FLAGELLUM ASSOCIATED CONTAINING COILED-COIL DOMAINS 1	0	NA
AMN	AMN	AMNION ASSOCIATED TRANSMEMBRANE PROTEIN	0	NA
ANKRD52	ANKRD52	ANKYRIN REPEAT DOMAIN 52	0	NA
ANKRD55	ANKRD55	ANKYRIN REPEAT DOMAIN 55	0	NA
ANKRD65	ANKRD65	ANKYRIN REPEAT DOMAIN 65	0	NA
ANXA11	ANXA11	ANNEXIN A11	0	NA
AP1M2	AP1M2	ADAPTOR RELATED PROTEIN COMPLEX 1 MU 2 SUBUNIT	0	NA
AP5B1	AP5B1	ADAPTOR RELATED PROTEIN COMPLEX 5 BETA 1 SUBUNIT	0	NA
APIP	APIP	APAF1 INTERACTING PROTEIN	0	NA
APOBEC3B	APOBEC3B	APOLIPOPROTEIN B MRNA EDITING ENZYME CATALYTIC SUBUNIT 3B	0	ENZYME
APOBEC3C	APOBEC3C	APOLIPOPROTEIN B MRNA EDITING ENZYME CATALYTIC SUBUNIT 3C	0	ENZYME
APOBEC3D	APOBEC3D	APOLIPOPROTEIN B MRNA EDITING ENZYME CATALYTIC SUBUNIT 3D	0	ENZYME
APOBR	APOBR	APOLIPOPROTEIN B RECEPTOR	0	NA
APOM	APOM	APOLIPOPROTEIN M	0	DRUGGABLE GENOME
ARAP3	ARAP3	ARFGAP WITH RHOGAP DOMAIN, ANKYRIN REPEAT AND PH DOMAIN 3	0	NA
ARFRP1	ARFRP1	ADP RIBOSYLATION FACTOR RELATED PROTEIN 1	0	CLINICALLY ACTIONABLE
ARID3A	ARID3A	AT-RICH INTERACTION DOMAIN 3A	0	TRANSCRIPTION FACTOR
ARL3	ARL3	ADP RIBOSYLATION FACTOR LIKE GTPASE 3	0	NA
ARL6IP4	ARL6IP4	ADP RIBOSYLATION FACTOR LIKE GTPASE 6 INTERACTING PROTEIN 4	0	NA
ARMC5	ARMC5	ARMADILLO REPEAT CONTAINING 5	0	ENZYME
ARMC7	ARMC7	ARMADILLO REPEAT CONTAINING 7	0	NA
ARPC1A	ARPC1A	ACTIN RELATED PROTEIN 2/3 COMPLEX SUBUNIT 1A	0	NA
ARPC2	ARPC2	ACTIN RELATED PROTEIN 2/3 COMPLEX SUBUNIT 2	0	NA
ARRDC2	ARRDC2	ARRESTIN DOMAIN CONTAINING 2	0	NA
ASB8	ASB8	ANKYRIN REPEAT AND SOCS BOX CONTAINING 8	0	NA
ATAD3A	ATAD3A	ATPASE FAMILY, AAA DOMAIN CONTAINING 3A	0	NA
ATAD3B	ATAD3B	ATPASE FAMILY, AAA DOMAIN CONTAINING 3B	0	NA
ATF6B	ATF6B	ACTIVATING TRANSCRIPTION FACTOR 6 BETA	0	TRANSCRIPTION FACTOR
ATG4D	ATG4D	AUTOPHAGY RELATED 4D CYSTEINE PEPTIDASE	0	PROTEASE,ENZYME
ATP1B3-AS1	ATP1B3-AS1	ATP1B3 ANTISENSE RNA 1	0	NA
ATP5I	ATP5ME	ATP SYNTHASE MEMBRANE SUBUNIT E	0	TRANSPORTER
ATP6V0A1	ATP6V0A1	ATPASE H+ TRANSPORTING V0 SUBUNIT A1	0	TRANSPORTER,ENZYME
ATP6V1B1	ATP6V1B1	ATPASE H+ TRANSPORTING V1 SUBUNIT B1	0	TRANSPORTER,DRUGGABLE GENOME,ENZYME
ATP6V1G2	ATP6V1G2	ATPASE H+ TRANSPORTING V1 SUBUNIT G2	0	TRANSPORTER,ABC TRANSPORTER,ENZYME
ATP6V1G2-DDX39B	ATP6V1G2-DDX39B	ATP6V1G2-DDX39B READTHROUGH (NMD CANDIDATE)	0	NA
ATP6V1G3	ATP6V1G3	ATPASE H+ TRANSPORTING V1 SUBUNIT G3	0	TRANSPORTER,ENZYME
ATP8B2	ATP8B2	ATPASE PHOSPHOLIPID TRANSPORTING 8B2	0	TRANSPORTER
ATXN2L	ATXN2L	ATAXIN 2 LIKE	0	NA
AUH	AUH	AU RNA BINDING METHYLGLUTACONYL-COA HYDRATASE	0	ENZYME
AURKAIP1	AURKAIP1	AURORA KINASE A INTERACTING PROTEIN 1	0	KINASE,DRUGGABLE GENOME
AZI2	AZI2	5-AZACYTIDINE INDUCED 2	0	KINASE
B3GALT6	B3GALT6	BETA-1,3-GALACTOSYLTRANSFERASE 6	0	ENZYME
B3GNT2	B3GNT2	UDP-GLCNAC:BETAGAL BETA-1,3-N-ACETYLGLUCOSAMINYLTRANSFERASE 2	0	ENZYME
B4GALT5	B4GALT5	BETA-1,4-GALACTOSYLTRANSFERASE 5	0	ENZYME
B4GALT7	B4GALT7	BETA-1,4-GALACTOSYLTRANSFERASE 7	0	ENZYME
BACH2	BACH2	BTB DOMAIN AND CNC HOMOLOG 2	0	NA
BANF1	BANF1	BARRIER TO AUTOINTEGRATION FACTOR 1	0	NA
BANK1	BANK1	B-CELL SCAFFOLD PROTEIN WITH ANKYRIN REPEATS 1	0	NA
BAZ1A	BAZ1A	BROMODOMAIN ADJACENT TO ZINC FINGER DOMAIN 1A	0	NUCLEAR HORMONE RECEPTOR
BBS7	BBS7	BARDET-BIEDL SYNDROME 7	0	NA
BCAT2	BCAT2	BRANCHED CHAIN AMINO ACID TRANSAMINASE 2	0	TRANSPORTER,ENZYME
BCKDK	BCKDK	BRANCHED CHAIN KETOACID DEHYDROGENASE KINASE	0	KINASE,SERINE THREONINE KINASE,DRUGGABLE GENOME,ENZYME
BCL11B	BCL11B	B-CELL CLL/LYMPHOMA 11B	0	CLINICALLY ACTIONABLE
BCL7C	BCL7C	BCL TUMOR SUPPRESSOR 7C	0	NA
BCL9L	BCL9L	B-CELL CLL/LYMPHOMA 9 LIKE	0	NA
BCS1L	BCS1L	BCS1 HOMOLOG, UBIQUINOL-CYTOCHROME C REDUCTASE COMPLEX CHAPERONE	0	TRANSPORTER
BDH2	BDH2	3-HYDROXYBUTYRATE DEHYDROGENASE 2	0	DRUGGABLE GENOME,SHORT CHAIN DEHYDROGENASE REDUCTASE
BEST1	BEST1	BESTROPHIN 1	0	TRANSPORTER,ION CHANNEL
BOLL	BOLL	BOULE HOMOLOG, RNA BINDING PROTEIN	0	NA
BRIX1	BRIX1	BRX1, BIOGENESIS OF RIBOSOMES	0	NA
BRMS1L	BRMS1L	BREAST CANCER METASTASIS-SUPPRESSOR 1 LIKE	0	NA
BTNL2	BTNL2	BUTYROPHILIN LIKE 2	0	EXTERNAL SIDE OF PLASMA MEMBRANE
BYSL	BYSL	BYSTIN LIKE	0	NA
C10ORF55	C10ORF55	CHROMOSOME 10 OPEN READING FRAME 55	0	NA
C10ORF88	C10ORF88	CHROMOSOME 10 OPEN READING FRAME 88	0	NA
C10ORF95	C10ORF95	CHROMOSOME 10 OPEN READING FRAME 95	0	NA
C11ORF1	C11ORF1	CHROMOSOME 11 OPEN READING FRAME 1	0	NA
C11ORF68	C11ORF68	CHROMOSOME 11 OPEN READING FRAME 68	0	NA
C12ORF65	MTRFR	MITOCHONDRIAL TRANSLATION RELEASE FACTOR IN RESCUE	0	NA
C15ORF39	C15ORF39	CHROMOSOME 15 OPEN READING FRAME 39	0	NA
C15ORF53	LINC02694	LONG INTERGENIC NON-PROTEIN CODING RNA 2694	0	NA
C17ORF107	C17ORF107	CHROMOSOME 17 OPEN READING FRAME 107	0	NA
C17ORF99	C17ORF99	CHROMOSOME 17 OPEN READING FRAME 99	0	DRUGGABLE GENOME
C19ORF24	FAM174C	FAMILY WITH SEQUENCE SIMILARITY 174 MEMBER C	0	NA
C1ORF159	C1ORF159	CHROMOSOME 1 OPEN READING FRAME 159	0	NA
C1ORF54	C1ORF54	CHROMOSOME 1 OPEN READING FRAME 54	0	NA
C1ORF74	C1ORF74	CHROMOSOME 1 OPEN READING FRAME 74	0	NA
C1QTNF6	C1QTNF6	C1Q AND TNF RELATED 6	0	DRUGGABLE GENOME
C2	C2	COMPLEMENT C2	0	PROTEASE,DRUGGABLE GENOME,ENZYME
C20ORF203	C20ORF203	CHROMOSOME 20 OPEN READING FRAME 203	0	NA
C21ORF33	GATD3A	GLUTAMINE AMIDOTRANSFERASE CLASS 1 DOMAIN CONTAINING 3A	0	NA
C2CD2L	C2CD2L	C2CD2 LIKE	0	NA
C2ORF82	SNORC	SECONDARY OSSIFICATION CENTER ASSOCIATED REGULATOR OF CHONDROCYTE MATURATION	0	NA
C6ORF10	TSBP1	TESTIS EXPRESSED BASIC PROTEIN 1	0	NA
C6ORF47	C6ORF47	CHROMOSOME 6 OPEN READING FRAME 47	0	NA
C6ORF47-AS1	C6ORF47-AS1	C6ORF47 ANTISENSE RNA 1	0	NA
C6ORF48	SNHG32	SMALL NUCLEOLAR RNA HOST GENE 32	0	NA
CA11	CA11	CARBONIC ANHYDRASE 11	0	DRUGGABLE GENOME
CAB39	CAB39	CALCIUM BINDING PROTEIN 39	0	NA
CARD9	CARD9	CASPASE RECRUITMENT DOMAIN FAMILY MEMBER 9	0	KINASE,DRUG RESISTANCE
CASC11	CASC11	CANCER SUSCEPTIBILITY 11 (NON-PROTEIN CODING)	0	NA
CASKIN2	CASKIN2	CASK INTERACTING PROTEIN 2	0	KINASE
CASP8AP2	CASP8AP2	CASPASE 8 ASSOCIATED PROTEIN 2	0	NUCLEAR HORMONE RECEPTOR
CBX6	CBX6	CHROMOBOX 6	0	NA
CBX7	CBX7	CHROMOBOX 7	0	NA
CCAT1	CCAT1	COLON CANCER ASSOCIATED TRANSCRIPT 1 (NON-PROTEIN CODING)	0	NA
CCDC101	SGF29	SAGA COMPLEX ASSOCIATED FACTOR 29	0	NA
CCDC104	CFAP36	CILIA AND FLAGELLA ASSOCIATED PROTEIN 36	0	NA
CCDC114	ODAD1	OUTER DYNEIN ARM DOCKING COMPLEX SUBUNIT 1	0	NA
CCDC116	CCDC116	COILED-COIL DOMAIN CONTAINING 116	0	NA
CCDC121	CCDC121	COILED-COIL DOMAIN CONTAINING 121	0	NA
CCDC155	KASH5	KASH DOMAIN CONTAINING 5	0	NA
CCDC26	CCDC26	CCDC26 LONG NON-CODING RNA	0	NA
CCDC85B	CCDC85B	COILED-COIL DOMAIN CONTAINING 85B	0	NA
CCDC86	CCDC86	COILED-COIL DOMAIN CONTAINING 86	0	NA
CCDC88B	CCDC88B	COILED-COIL DOMAIN CONTAINING 88B	0	NA
CCL1	CCL1	C-C MOTIF CHEMOKINE LIGAND 1	0	DRUGGABLE GENOME
CCL13	CCL13	C-C MOTIF CHEMOKINE LIGAND 13	0	DRUGGABLE GENOME
CCNL2	CCNL2	CYCLIN L2	0	KINASE
CCNT2	CCNT2	CYCLIN T2	0	KINASE
CCNY	CCNY	CYCLIN Y	0	KINASE
CCR7	CCR7	C-C MOTIF CHEMOKINE RECEPTOR 7	0	CELL SURFACE,G PROTEIN COUPLED RECEPTOR,EXTERNAL SIDE OF PLASMA MEMBRANE,DRUGGABLE GENOME
CCT4	CCT4	CHAPERONIN CONTAINING TCP1 SUBUNIT 4	0	NA
CCT5	CCT5	CHAPERONIN CONTAINING TCP1 SUBUNIT 5	0	NA
CD207	CD207	CD207 MOLECULE	0	DRUGGABLE GENOME
CD226	CD226	CD226 MOLECULE	0	CELL SURFACE,EXTERNAL SIDE OF PLASMA MEMBRANE,DRUGGABLE GENOME
CD27-AS1	CD27-AS1	CD27 ANTISENSE RNA 1	0	NA
CD48	CD48	CD48 MOLECULE	0	DRUGGABLE GENOME
CD63	CD63	CD63 MOLECULE	0	CELL SURFACE,KINASE,DRUGGABLE GENOME
CD9	CD9	CD9 MOLECULE	0	DRUGGABLE GENOME
CEBPB	CEBPB	CCAAT/ENHANCER BINDING PROTEIN BETA	0	TRANSCRIPTION FACTOR
CENPL	CENPL	CENTROMERE PROTEIN L	0	NA
CEP19	CEP19	CENTROSOMAL PROTEIN 19	0	NA
CFDP1	CFDP1	CRANIOFACIAL DEVELOPMENT PROTEIN 1	0	NA
CHAC2	CHAC2	CHAC CATION TRANSPORT REGULATOR HOMOLOG 2	0	NA
CHCHD1	CHCHD1	COILED-COIL-HELIX-COILED-COIL-HELIX DOMAIN CONTAINING 1	0	NA
CHTF8	CHTF8	CHROMOSOME TRANSMISSION FIDELITY FACTOR 8	0	NA
CIRBP	CIRBP	COLD INDUCIBLE RNA BINDING PROTEIN	0	NA
CIRBP-AS1	CIRBP-AS1	CIRBP ANTISENSE RNA 1	0	NA
CIRH1A	UTP4	UTP4, SMALL SUBUNIT PROCESSOME COMPONENT	0	NA
CISD2	CISD2	CDGSH IRON SULFUR DOMAIN 2	0	NA
CKAP2L	CKAP2L	CYTOSKELETON ASSOCIATED PROTEIN 2 LIKE	0	NA
CKS1B	CKS1B	CDC28 PROTEIN KINASE REGULATORY SUBUNIT 1B	0	KINASE,CLINICALLY ACTIONABLE
CLDN23	CLDN23	CLAUDIN 23	0	NA
CLEC16A	CLEC16A	C-TYPE LECTIN DOMAIN CONTAINING 16A	0	NA
CLEC2D	CLEC2D	C-TYPE LECTIN DOMAIN FAMILY 2 MEMBER D	0	CELL SURFACE,EXTERNAL SIDE OF PLASMA MEMBRANE
CLEC4F	CLEC4F	C-TYPE LECTIN DOMAIN FAMILY 4 MEMBER F	0	NA
CLECL1	CLECL1	C-TYPE LECTIN LIKE 1	0	NA
CLHC1	CLHC1	CLATHRIN HEAVY CHAIN LINKER DOMAIN CONTAINING 1	0	NA
CLIC1	CLIC1	CHLORIDE INTRACELLULAR CHANNEL 1	0	TUMOR SUPPRESSOR,ION CHANNEL
CLN3	CLN3	CLN3, BATTENIN	0	TRANSPORTER
CMC1	CMC1	C-X9-C MOTIF CONTAINING 1	0	NA
CNN2	CNN2	CALPONIN 2	0	NA
CNPY2	CNPY2	CANOPY FGF SIGNALING REGULATOR 2	0	NA
CNTRL	CNTRL	CENTRIOLIN	0	CLINICALLY ACTIONABLE
COG6	COG6	COMPONENT OF OLIGOMERIC GOLGI COMPLEX 6	0	NA
COMMD1	COMMD1	COPPER METABOLISM DOMAIN CONTAINING 1	0	NA
COMMD9	COMMD9	COMM DOMAIN CONTAINING 9	0	NA
COMTD1	COMTD1	CATECHOL-O-METHYLTRANSFERASE DOMAIN CONTAINING 1	0	DRUGGABLE GENOME
COQ10A	COQ10A	COENZYME Q10A	0	NA
COX11	COX11	COX11, CYTOCHROME C OXIDASE COPPER CHAPERONE	0	ENZYME
COX5A	COX5A	CYTOCHROME C OXIDASE SUBUNIT 5A	0	TRANSPORTER,ENZYME
COX6A2	COX6A2	CYTOCHROME C OXIDASE SUBUNIT 6A2	0	ENZYME
CPLX1	CPLX1	COMPLEXIN 1	0	NA
CPLX3	CPLX3	COMPLEXIN 3	0	NA
CPNE5	CPNE5	COPINE 5	0	NA
CPSF3L	INTS11	INTEGRATOR COMPLEX SUBUNIT 11	0	NA
CPSF7	CPSF7	CLEAVAGE AND POLYADENYLATION SPECIFIC FACTOR 7	0	NA
CPT1C	CPT1C	CARNITINE PALMITOYLTRANSFERASE 1C	0	DRUGGABLE GENOME,ENZYME
CREG1	CREG1	CELLULAR REPRESSOR OF E1A STIMULATED GENES 1	0	DRUGGABLE GENOME,TRANSCRIPTION FACTOR
CREM	CREM	CAMP RESPONSIVE ELEMENT MODULATOR	0	TRANSCRIPTION FACTOR COMPLEX,TRANSCRIPTION FACTOR
CRTC3	CRTC3	CREB REGULATED TRANSCRIPTION COACTIVATOR 3	0	CLINICALLY ACTIONABLE
CRYAA	CRYAA	CRYSTALLIN ALPHA A	0	NA
CRYZL1	CRYZL1	CRYSTALLIN ZETA LIKE 1	0	DRUGGABLE GENOME
CS	CS	CITRATE SYNTHASE	0	ENZYME
CSNK2B	CSNK2B	CASEIN KINASE 2 BETA	0	KINASE,SERINE THREONINE KINASE,TRANSCRIPTION FACTOR BINDING,ENZYME
CST6	CST6	CYSTATIN E/M	0	PROTEASE INHIBITOR,DRUGGABLE GENOME
CTIF	CTIF	CAP BINDING COMPLEX DEPENDENT TRANSLATION INITIATION FACTOR	0	NA
CTRB2	CTRB2	CHYMOTRYPSINOGEN B2	0	PROTEASE,DRUGGABLE GENOME
CTSW	CTSW	CATHEPSIN W	0	PROTEASE,DRUGGABLE GENOME
CUEDC2	CUEDC2	CUE DOMAIN CONTAINING 2	0	NA
CUL2	CUL2	CULLIN 2	0	ENZYME
CXCR5	CXCR5	C-X-C MOTIF CHEMOKINE RECEPTOR 5	0	G PROTEIN COUPLED RECEPTOR,EXTERNAL SIDE OF PLASMA MEMBRANE,DRUGGABLE GENOME
CYLD	CYLD	CYLD LYSINE 63 DEUBIQUITINASE	0	KINASE,PROTEASE,CLINICALLY ACTIONABLE,ENZYME
CYP20A1	CYP20A1	CYTOCHROME P450 FAMILY 20 SUBFAMILY A MEMBER 1	0	DRUGGABLE GENOME,CYTOCHROME P450,ENZYME
D2HGDH	D2HGDH	D-2-HYDROXYGLUTARATE DEHYDROGENASE	0	ENZYME
DARS2	DARS2	ASPARTYL-TRNA SYNTHETASE 2, MITOCHONDRIAL	0	ENZYME
DBN1	DBN1	DREBRIN 1	0	NA
DCTN4	DCTN4	DYNACTIN SUBUNIT 4	0	NA
DDX39B	DDX39B	DEXD-BOX HELICASE 39B	0	NA
DDX39B-AS1	DDX39B-AS1	DDX39B ANTISENSE RNA 1	0	NA
DDX41	DDX41	DEAD-BOX HELICASE 41	0	ENZYME
DDX55	DDX55	DEAD-BOX HELICASE 55	0	NA
DDX6	DDX6	DEAD-BOX HELICASE 6	0	CLINICALLY ACTIONABLE,ENZYME
DEXI	DEXI	DEXI HOMOLOG	0	NA
DGKA	DGKA	DIACYLGLYCEROL KINASE ALPHA	0	KINASE
DGKD	DGKD	DIACYLGLYCEROL KINASE DELTA	0	KINASE,ENZYME
DGKQ	DGKQ	DIACYLGLYCEROL KINASE THETA	0	KINASE
DMXL1	DMXL1	DMX LIKE 1	0	TRANSCRIPTION FACTOR
DNAJB14	DNAJB14	DNAJ HEAT SHOCK PROTEIN FAMILY (HSP40) MEMBER B14	0	NA
DNAJC14	DNAJC14	DNAJ HEAT SHOCK PROTEIN FAMILY (HSP40) MEMBER C14	0	NA
DNAJC21	DNAJC21	DNAJ HEAT SHOCK PROTEIN FAMILY (HSP40) MEMBER C21	0	NA
DNAJC28	DNAJC28	DNAJ HEAT SHOCK PROTEIN FAMILY (HSP40) MEMBER C28	0	NA
DNAJC4	DNAJC4	DNAJ HEAT SHOCK PROTEIN FAMILY (HSP40) MEMBER C4	0	NA
DNAJC5	DNAJC5	DNAJ HEAT SHOCK PROTEIN FAMILY (HSP40) MEMBER C5	0	NA
DNLZ	DNLZ	DNL-TYPE ZINC FINGER	0	NA
DNM2	DNM2	DYNAMIN 2	0	TRANSPORTER,CLINICALLY ACTIONABLE,ENZYME
DNTTIP1	DNTTIP1	DEOXYNUCLEOTIDYLTRANSFERASE TERMINAL INTERACTING PROTEIN 1	0	NA
DOCK9	DOCK9	DEDICATOR OF CYTOKINESIS 9	0	NA
DOCK9-AS1	DOCK9-AS1	DOCK9 ANTISENSE RNA 1	0	NA
DOCK9-AS2	DOCK9-DT	DOCK9 DIVERGENT TRANSCRIPT	0	NA
DOK3	DOK3	DOCKING PROTEIN 3	0	NA
DOLK	DOLK	DOLICHOL KINASE	0	KINASE,ENZYME
DONSON	DONSON	DOWNSTREAM NEIGHBOR OF SON	0	NA
DPAGT1	DPAGT1	DOLICHYL-PHOSPHATE N-ACETYLGLUCOSAMINEPHOSPHOTRANSFERASE 1	0	ENZYME
DPM3	DPM3	DOLICHYL-PHOSPHATE MANNOSYLTRANSFERASE SUBUNIT 3	0	ENZYME
DRAP1	DRAP1	DR1 ASSOCIATED PROTEIN 1	0	TRANSCRIPTION FACTOR
DTNB	DTNB	DYSTROBREVIN BETA	0	NA
DTWD2	DTWD2	DTW DOMAIN CONTAINING 2	0	NA
DUSP13	DUSP13	DUAL SPECIFICITY PHOSPHATASE 13	0	PROTEIN PHOSPHATASE,KINASE,DRUGGABLE GENOME
DUSP22	DUSP22	DUAL SPECIFICITY PHOSPHATASE 22	0	PROTEIN PHOSPHATASE,KINASE,DRUGGABLE GENOME,CLINICALLY ACTIONABLE
DUSP5	DUSP5	DUAL SPECIFICITY PHOSPHATASE 5	0	PROTEIN PHOSPHATASE,KINASE,DRUGGABLE GENOME
DVL1	DVL1	DISHEVELLED SEGMENT POLARITY PROTEIN 1	0	NA
DXO	DXO	DECAPPING EXORIBONUCLEASE	0	ENZYME
DYNLT1	DYNLT1	DYNEIN LIGHT CHAIN TCTEX-TYPE 1	0	NA
EDC3	EDC3	ENHANCER OF MRNA DECAPPING 3	0	NA
EFEMP2	EFEMP2	EGF CONTAINING FIBULIN LIKE EXTRACELLULAR MATRIX PROTEIN 2	0	DRUGGABLE GENOME
EFHD1	EFHD1	EF-HAND DOMAIN FAMILY MEMBER D1	0	NA
EFNA3	EFNA3	EPHRIN A3	0	KINASE
EFNA4	EFNA4	EPHRIN A4	0	KINASE,DRUGGABLE GENOME
EFR3B	EFR3B	EFR3 HOMOLOG B	0	KINASE
EGR2	EGR2	EARLY GROWTH RESPONSE 2	0	TRANSCRIPTION FACTOR
EHMT2-AS1	EHMT2-AS1	EHMT2 AND SLC44A4 ANTISENSE RNA 1	0	NA
EIF1	EIF1	EUKARYOTIC TRANSLATION INITIATION FACTOR 1	0	NA
EIF1AD	EIF1AD	EUKARYOTIC TRANSLATION INITIATION FACTOR 1A DOMAIN CONTAINING	0	NA
EIF2B4	EIF2B4	EUKARYOTIC TRANSLATION INITIATION FACTOR 2B SUBUNIT DELTA	0	NA
ELMO1	ELMO1	ENGULFMENT AND CELL MOTILITY 1	0	NA
ELMO2	ELMO2	ENGULFMENT AND CELL MOTILITY 2	0	NA
ELOVL3	ELOVL3	ELOVL FATTY ACID ELONGASE 3	0	DRUGGABLE GENOME,ENZYME
EMP3	EMP3	EPITHELIAL MEMBRANE PROTEIN 3	0	NA
ENDOD1	ENDOD1	ENDONUCLEASE DOMAIN CONTAINING 1	0	DRUGGABLE GENOME
ENDOU	ENDOU	ENDONUCLEASE, POLY(U) SPECIFIC	0	GROWTH FACTOR,PROTEASE,DRUGGABLE GENOME
ENO1	ENO1	ENOLASE 1	0	CELL SURFACE,ENZYME
ENO1-AS1	ENO1-AS1	ENO1 ANTISENSE RNA 1	0	NA
ENO1-IT1	ENO1-IT1	ENO1 INTRONIC TRANSCRIPT 1	0	NA
EOMES	EOMES	EOMESODERMIN	0	TRANSCRIPTION FACTOR
EPSTI1	EPSTI1	EPITHELIAL STROMAL INTERACTION 1	0	NA
ERGIC1	ERGIC1	ENDOPLASMIC RETICULUM-GOLGI INTERMEDIATE COMPARTMENT 1	0	NA
ERI1	ERI1	EXORIBONUCLEASE 1	0	NA
ERLEC1	ERLEC1	ENDOPLASMIC RETICULUM LECTIN 1	0	NA
ERVH48-1	ERVH48-1	ENDOGENOUS RETROVIRUS GROUP 48 MEMBER 1	0	NA
ESYT1	ESYT1	EXTENDED SYNAPTOTAGMIN 1	0	NA
ETS1	ETS1	ETS PROTO-ONCOGENE 1, TRANSCRIPTION FACTOR	0	TRANSCRIPTION FACTOR BINDING,CLINICALLY ACTIONABLE,TRANSCRIPTION FACTOR
EXOSC9	EXOSC9	EXOSOME COMPONENT 9	0	NA
F11R	F11R	F11 RECEPTOR	0	DRUGGABLE GENOME
FADS1	FADS1	FATTY ACID DESATURASE 1	0	ENZYME
FADS2	FADS2	FATTY ACID DESATURASE 2	0	ENZYME
FADS3	FADS3	FATTY ACID DESATURASE 3	0	ENZYME
FAIM3	FCMR	FC FRAGMENT OF IGM RECEPTOR	0	NA
FAM132A	C1QTNF12	C1Q AND TNF RELATED 12	0	HORMONE ACTIVITY
FAM136A	FAM136A	FAMILY WITH SEQUENCE SIMILARITY 136 MEMBER A	0	NA
FAM161A	FAM161A	FAMILY WITH SEQUENCE SIMILARITY 161 MEMBER A	0	NA
FAM173B	ATPSCKMT	ATP SYNTHASE C SUBUNIT LYSINE N-METHYLTRANSFERASE	0	NA
FAM174A	FAM174A	FAMILY WITH SEQUENCE SIMILARITY 174 MEMBER A	0	NA
FAM175B	ABRAXAS2	ABRAXAS 2, BRISC COMPLEX SUBUNIT	0	NA
FAM193B	FAM193B	FAMILY WITH SEQUENCE SIMILARITY 193 MEMBER B	0	NA
FAM213A	PRXL2A	PEROXIREDOXIN LIKE 2A	0	NA
FAM213B	PRXL2B	PEROXIREDOXIN LIKE 2B	0	NA
FAM219B	FAM219B	FAMILY WITH SEQUENCE SIMILARITY 219 MEMBER B	0	NA
FAM220A	FAM220A	FAMILY WITH SEQUENCE SIMILARITY 220 MEMBER A	0	NA
FAM53B	FAM53B	FAMILY WITH SEQUENCE SIMILARITY 53 MEMBER B	0	NA
FAM83E	FAM83E	FAMILY WITH SEQUENCE SIMILARITY 83 MEMBER E	0	NA
FAM84B	LRATD2	LRAT DOMAIN CONTAINING 2	0	NA
FBXL15	FBXL15	F-BOX AND LEUCINE RICH REPEAT PROTEIN 15	0	NA
FBXO18	FBH1	F-BOX DNA HELICASE 1	0	ENZYME
FBXW2	FBXW2	F-BOX AND WD REPEAT DOMAIN CONTAINING 2	0	ENZYME
FCHSD1	FCHSD1	FCH AND DOUBLE SH3 DOMAINS 1	0	NA
FDX1L	FDX2	FERREDOXIN 2	0	NA
FDXACB1	FDXACB1	FERREDOXIN-FOLD ANTICODON BINDING DOMAIN CONTAINING 1	0	NA
FERMT3	FERMT3	FERMITIN FAMILY MEMBER 3	0	NA
FIBP	FIBP	FGF1 INTRACELLULAR BINDING PROTEIN	0	NA
FIGLA	FIGLA	FOLLICULOGENESIS SPECIFIC BHLH TRANSCRIPTION FACTOR	0	TRANSCRIPTION FACTOR COMPLEX,TRANSCRIPTION FACTOR BINDING,TRANSCRIPTION FACTOR
FIGNL1	FIGNL1	FIDGETIN LIKE 1	0	TUMOR SUPPRESSOR
FJX1	FJX1	FOUR JOINTED BOX 1	0	DRUGGABLE GENOME
FKBP2	FKBP2	FK506 BINDING PROTEIN 2	0	DRUGGABLE GENOME
FLAD1	FLAD1	FLAVIN ADENINE DINUCLEOTIDE SYNTHETASE 1	0	ENZYME
FLI1	FLI1	FLI-1 PROTO-ONCOGENE, ETS TRANSCRIPTION FACTOR	0	CLINICALLY ACTIONABLE,TRANSCRIPTION FACTOR
FLI1-AS1	SENCR	SMOOTH MUSCLE AND ENDOTHELIAL CELL ENRICHED MIGRATION/DIFFERENTIATION-ASSOCIATED LNCRNA	0	NA
FLNB	FLNB	FILAMIN B	0	TRANSPORTER
FOXP1	FOXP1	FORKHEAD BOX P1	0	CLINICALLY ACTIONABLE,TRANSCRIPTION FACTOR
FOXP1-AS1	FOXP1-AS1	FOXP1 ANTISENSE RNA 1	0	NA
FOXP1-IT1	FOXP1-IT1	FOXP1 INTRONIC TRANSCRIPT 1	0	NA
FOXR1	FOXR1	FORKHEAD BOX R1	0	TRANSCRIPTION FACTOR
FRS3	FRS3	FIBROBLAST GROWTH FACTOR RECEPTOR SUBSTRATE 3	0	KINASE
FRYL	FRYL	FRY LIKE TRANSCRIPTION COACTIVATOR	0	NA
FTH1	FTH1	FERRITIN HEAVY CHAIN 1	0	NA
FTL	FTL	FERRITIN LIGHT CHAIN	0	NA
FURIN	FURIN	FURIN, PAIRED BASIC AMINO ACID CLEAVING ENZYME	0	CELL SURFACE,PROTEASE,DRUGGABLE GENOME,ENZYME
FUT1	FUT1	FUCOSYLTRANSFERASE 1 (H BLOOD GROUP)	0	DRUGGABLE GENOME,ENZYME
FUT11	FUT11	FUCOSYLTRANSFERASE 11	0	NA
FYB	FYB1	FYN BINDING PROTEIN 1	0	NA
GABARAPL3	GABARAPL3	GABA TYPE A RECEPTOR ASSOCIATED PROTEIN LIKE 3 PSEUDOGENE	0	NA
GAS5	GAS5	GROWTH ARREST SPECIFIC 5 (NON-PROTEIN CODING)	0	NA
GAS5-AS1	GAS5-AS1	GAS5 ANTISENSE RNA 1	0	NA
GBF1	GBF1	GOLGI BREFELDIN A RESISTANT GUANINE NUCLEOTIDE EXCHANGE FACTOR 1	0	G PROTEIN COUPLED RECEPTOR
GDF11	GDF11	GROWTH DIFFERENTIATION FACTOR 11	0	GROWTH FACTOR,DRUGGABLE GENOME,TRANSCRIPTION FACTOR
GGA3	GGA3	GOLGI ASSOCIATED, GAMMA ADAPTIN EAR CONTAINING, ARF BINDING PROTEIN 3	0	G PROTEIN COUPLED RECEPTOR
GGNBP1	GGNBP1	GAMETOGENETIN BINDING PROTEIN 1 (PSEUDOGENE)	0	NA
GIGYF2	GIGYF2	GRB10 INTERACTING GYF PROTEIN 2	0	KINASE
GLB1	GLB1	GALACTOSIDASE BETA 1	0	DRUGGABLE GENOME,ENZYME
GLRX	GLRX	GLUTAREDOXIN	0	ENZYME
GLS2	GLS2	GLUTAMINASE 2	0	NA
GLTPD1	CPTP	CERAMIDE-1-PHOSPHATE TRANSFER PROTEIN	0	NA
GMEB2	GMEB2	GLUCOCORTICOID MODULATORY ELEMENT BINDING PROTEIN 2	0	NA
GNPDA1	GNPDA1	GLUCOSAMINE-6-PHOSPHATE DEAMINASE 1	0	ENZYME
GPALPP1	GPALPP1	GPALPP MOTIFS CONTAINING 1	0	NA
GPANK1	GPANK1	G-PATCH DOMAIN AND ANKYRIN REPEATS 1	0	NA
GPN1	GPN1	GPN-LOOP GTPASE 1	0	ENZYME
GPR108	GPR108	G PROTEIN-COUPLED RECEPTOR 108	0	NA
GPR137	GPR137	G PROTEIN-COUPLED RECEPTOR 137	0	G PROTEIN COUPLED RECEPTOR
GPR65	GPR65	G PROTEIN-COUPLED RECEPTOR 65	0	G PROTEIN COUPLED RECEPTOR,DRUGGABLE GENOME
GPR75-ASB3	GPR75-ASB3	GPR75-ASB3 READTHROUGH	0	NA
GPX4	GPX4	GLUTATHIONE PEROXIDASE 4	0	DRUGGABLE GENOME,ENZYME
GRB10	GRB10	GROWTH FACTOR RECEPTOR BOUND PROTEIN 10	0	KINASE
GRB2	GRB2	GROWTH FACTOR RECEPTOR BOUND PROTEIN 2	0	NA
GRB7	GRB7	GROWTH FACTOR RECEPTOR BOUND PROTEIN 7	0	KINASE
GRWD1	GRWD1	GLUTAMATE RICH WD REPEAT CONTAINING 1	0	NA
GSDMB	GSDMB	GASDERMIN B	0	NA
GTF2H5	GTF2H5	GENERAL TRANSCRIPTION FACTOR IIH SUBUNIT 5	0	KINASE,TRANSCRIPTION FACTOR
GTF3C2	GTF3C2	GENERAL TRANSCRIPTION FACTOR IIIC SUBUNIT 2	0	TRANSCRIPTION FACTOR
GTPBP2	GTPBP2	GTP BINDING PROTEIN 2	0	NA
GUCA1A	GUCA1A	GUANYLATE CYCLASE ACTIVATOR 1A	0	ENZYME
GUCA1B	GUCA1B	GUANYLATE CYCLASE ACTIVATOR 1B	0	NA
GYS1	GYS1	GLYCOGEN SYNTHASE 1	0	ENZYME
H19	H19	H19, IMPRINTED MATERNALLY EXPRESSED TRANSCRIPT (NON-PROTEIN CODING)	0	NA
H2AFZ	H2AZ1	H2A.Z VARIANT HISTONE 1	0	NA
HAAO	HAAO	3-HYDROXYANTHRANILATE 3,4-DIOXYGENASE	0	ENZYME
HCG23	HCG23	HLA COMPLEX GROUP 23 (NON-PROTEIN CODING)	0	NA
HCG27	HCG27	HLA COMPLEX GROUP 27 (NON-PROTEIN CODING)	0	NA
HCG9	HCG9	HLA COMPLEX GROUP 9 (NON-PROTEIN CODING)	0	NA
HDDC3	HDDC3	HD DOMAIN CONTAINING 3	0	ENZYME
HDLBP	HDLBP	HIGH DENSITY LIPOPROTEIN BINDING PROTEIN	0	NA
HELZ2	HELZ2	HELICASE WITH ZINC FINGER 2	0	NUCLEAR HORMONE RECEPTOR
HES4	HES4	HES FAMILY BHLH TRANSCRIPTION FACTOR 4	0	TRANSCRIPTION FACTOR BINDING,TRANSCRIPTION FACTOR
HES5	HES5	HES FAMILY BHLH TRANSCRIPTION FACTOR 5	0	TRANSCRIPTION FACTOR BINDING,TRANSCRIPTION FACTOR
HHAT	HHAT	HEDGEHOG ACYLTRANSFERASE	0	DRUGGABLE GENOME,ENZYME
HIC2	HIC2	HIC ZBTB TRANSCRIPTIONAL REPRESSOR 2	0	NA
HIF1A-AS1	HIF1A-AS1	HIF1A ANTISENSE RNA 1	0	NA
HIF1A-AS2	HIF1A-AS2	HIF1A ANTISENSE RNA 2	0	NA
HIP1R	HIP1R	HUNTINGTIN INTERACTING PROTEIN 1 RELATED	0	KINASE
HLA-DOB	HLA-DOB	MAJOR HISTOCOMPATIBILITY COMPLEX, CLASS II, DO BETA	0	DRUGGABLE GENOME
HLA-DQA2	HLA-DQA2	MAJOR HISTOCOMPATIBILITY COMPLEX, CLASS II, DQ ALPHA 2	0	DRUGGABLE GENOME
HLA-DQB1-AS1	HLA-DQB1-AS1	HLA-DQB1 ANTISENSE RNA 1	0	NA
HLA-DQB2	HLA-DQB2	MAJOR HISTOCOMPATIBILITY COMPLEX, CLASS II, DQ BETA 2	0	NA
HLA-F	HLA-F	MAJOR HISTOCOMPATIBILITY COMPLEX, CLASS I, F	0	CELL SURFACE,EXTERNAL SIDE OF PLASMA MEMBRANE
HLA-F-AS1	HLA-F-AS1	HLA-F ANTISENSE RNA 1	0	NA
HMGXB4	HMGXB4	HMG-BOX CONTAINING 4	0	NA
HMHA1	ARHGAP45	RHO GTPASE ACTIVATING PROTEIN 45	0	NA
HOTTIP	HOTTIP	HOXA DISTAL TRANSCRIPT ANTISENSE RNA	0	NA
HOXA10	HOXA10	HOMEOBOX A10	0	TRANSCRIPTION FACTOR COMPLEX,TRANSCRIPTION FACTOR
HOXA11-AS	HOXA11-AS	HOXA11 ANTISENSE RNA	0	NA
HOXA13	HOXA13	HOMEOBOX A13	0	CLINICALLY ACTIONABLE,TRANSCRIPTION FACTOR
HSD17B14	HSD17B14	HYDROXYSTEROID 17-BETA DEHYDROGENASE 14	0	DRUGGABLE GENOME,SHORT CHAIN DEHYDROGENASE REDUCTASE
HSF2BP	HSF2BP	HEAT SHOCK TRANSCRIPTION FACTOR 2 BINDING PROTEIN	0	NA
HSPA1B	HSPA1B	HEAT SHOCK PROTEIN FAMILY A (HSP70) MEMBER 1B	0	DRUGGABLE GENOME
ICAM4	ICAM4	INTERCELLULAR ADHESION MOLECULE 4 (LANDSTEINER-WIENER BLOOD GROUP)	0	DRUGGABLE GENOME
ICAM5	ICAM5	INTERCELLULAR ADHESION MOLECULE 5	0	NA
ID2	ID2	INHIBITOR OF DNA BINDING 2, HLH PROTEIN	0	TRANSCRIPTION FACTOR
IDUA	IDUA	IDURONIDASE, ALPHA-L-	0	ENZYME
IFFO1	IFFO1	INTERMEDIATE FILAMENT FAMILY ORPHAN 1	0	NA
IFT172	IFT172	INTRAFLAGELLAR TRANSPORT 172	0	NA
IFT27	IFT27	INTRAFLAGELLAR TRANSPORT 27	0	NA
IGF2-AS	IGF2-AS	IGF2 ANTISENSE RNA	0	NA
IKZF3	IKZF3	IKAROS FAMILY ZINC FINGER 3	0	CLINICALLY ACTIONABLE,TRANSCRIPTION FACTOR
IKZF4	IKZF4	IKAROS FAMILY ZINC FINGER 4	0	TRANSCRIPTION FACTOR
IL10RB-AS1	IL10RB-DT	IL10RB DIVERGENT TRANSCRIPT	0	NA
IL12RB1	IL12RB1	INTERLEUKIN 12 RECEPTOR SUBUNIT BETA 1	0	EXTERNAL SIDE OF PLASMA MEMBRANE,DRUGGABLE GENOME
IL12RB2	IL12RB2	INTERLEUKIN 12 RECEPTOR SUBUNIT BETA 2	0	EXTERNAL SIDE OF PLASMA MEMBRANE,DRUGGABLE GENOME
IL18R1	IL18R1	INTERLEUKIN 18 RECEPTOR 1	0	DRUGGABLE GENOME
IL18RAP	IL18RAP	INTERLEUKIN 18 RECEPTOR ACCESSORY PROTEIN	0	DRUGGABLE GENOME
IL19	IL19	INTERLEUKIN 19	0	DRUGGABLE GENOME
IL1RL1	IL1RL1	INTERLEUKIN 1 RECEPTOR LIKE 1	0	EXTERNAL SIDE OF PLASMA MEMBRANE,DRUGGABLE GENOME
IL26	IL26	INTERLEUKIN 26	0	DRUGGABLE GENOME
IL27	IL27	INTERLEUKIN 27	0	DRUGGABLE GENOME
ILF3-AS1	ILF3-DT	ILF3 DIVERGENT TRANSCRIPT	0	NA
INCENP	INCENP	INNER CENTROMERE PROTEIN	0	NA
ING5	ING5	INHIBITOR OF GROWTH FAMILY MEMBER 5	0	NA
INS-IGF2	INS-IGF2	INS-IGF2 READTHROUGH	0	HORMONE ACTIVITY,DRUGGABLE GENOME
IQGAP1	IQGAP1	IQ MOTIF CONTAINING GTPASE ACTIVATING PROTEIN 1	0	NA
IRF1	IRF1	INTERFERON REGULATORY FACTOR 1	0	TUMOR SUPPRESSOR,CLINICALLY ACTIONABLE
IRF4	IRF4	INTERFERON REGULATORY FACTOR 4	0	TRANSCRIPTION FACTOR BINDING,CLINICALLY ACTIONABLE,TRANSCRIPTION FACTOR
IRF6	IRF6	INTERFERON REGULATORY FACTOR 6	0	TRANSCRIPTION FACTOR
ITGAD	ITGAD	INTEGRIN SUBUNIT ALPHA D	0	CELL SURFACE,DRUGGABLE GENOME
ITLN1	ITLN1	INTELECTIN 1	0	DRUGGABLE GENOME,FIBRINOGEN
ITLN2	ITLN2	INTELECTIN 2	0	DRUGGABLE GENOME,FIBRINOGEN
ITPKA	ITPKA	INOSITOL-TRISPHOSPHATE 3-KINASE A	0	KINASE,ENZYME
ITPKB	ITPKB	INOSITOL-TRISPHOSPHATE 3-KINASE B	0	KINASE,ENZYME
ITPKB-AS1	ITPKB-AS1	ITPKB ANTISENSE RNA 1	0	NA
ITPKB-IT1	ITPKB-IT1	ITPKB INTRONIC TRANSCRIPT 1	0	NA
ITPR3	ITPR3	INOSITOL 1,4,5-TRISPHOSPHATE RECEPTOR TYPE 3	0	ION CHANNEL,DRUGGABLE GENOME
IZUMO1	IZUMO1	IZUMO SPERM-EGG FUSION 1	0	NA
JARID2	JARID2	JUMONJI AND AT-RICH INTERACTION DOMAIN CONTAINING 2	0	TRANSCRIPTION FACTOR BINDING,CLINICALLY ACTIONABLE
JARID2-AS1	JARID2-AS1	JARID2 ANTISENSE RNA 1	0	NA
JHDM1D-AS1	KDM7A-DT	KDM7A DIVERGENT TRANSCRIPT	0	NA
KAT8	KAT8	LYSINE ACETYLTRANSFERASE 8	0	TRANSCRIPTION FACTOR BINDING,ENZYME
KATNA1	KATNA1	KATANIN CATALYTIC SUBUNIT A1	0	ENZYME
KCTD17	KCTD17	POTASSIUM CHANNEL TETRAMERIZATION DOMAIN CONTAINING 17	0	ENZYME
KCTD20	KCTD20	POTASSIUM CHANNEL TETRAMERIZATION DOMAIN CONTAINING 20	0	NA
KCTD6	KCTD6	POTASSIUM CHANNEL TETRAMERIZATION DOMAIN CONTAINING 6	0	TRANSCRIPTION FACTOR
KIAA1109	KIAA1109	KIAA1109	0	NA
KIAA1919	MFSD4B	MAJOR FACILITATOR SUPERFAMILY DOMAIN CONTAINING 4B	0	TRANSPORTER,DRUGGABLE GENOME
KLF3	KLF3	KRUPPEL LIKE FACTOR 3	0	NA
KLHL17	KLHL17	KELCH LIKE FAMILY MEMBER 17	0	DRUGGABLE GENOME
KLHL20	KLHL20	KELCH LIKE FAMILY MEMBER 20	0	DRUGGABLE GENOME
KLRB1	KLRB1	KILLER CELL LECTIN LIKE RECEPTOR B1	0	KINASE,DRUGGABLE GENOME
KRI1	KRI1	KRI1 HOMOLOG	0	NA
KRT28	KRT28	KERATIN 28	0	NA
KRTAP5-6	KRTAP5-6	KERATIN ASSOCIATED PROTEIN 5-6	0	NA
KRTCAP2	KRTCAP2	KERATINOCYTE ASSOCIATED PROTEIN 2	0	ENZYME
KRTCAP3	KRTCAP3	KERATINOCYTE ASSOCIATED PROTEIN 3	0	NA
LATS1	LATS1	LARGE TUMOR SUPPRESSOR KINASE 1	0	KINASE,SERINE THREONINE KINASE,DRUGGABLE GENOME,CLINICALLY ACTIONABLE,ENZYME
LCLAT1	LCLAT1	LYSOCARDIOLIPIN ACYLTRANSFERASE 1	0	ENZYME
LHPP	LHPP	PHOSPHOLYSINE PHOSPHOHISTIDINE INORGANIC PYROPHOSPHATE PHOSPHATASE	0	NA
LIME1	LIME1	LCK INTERACTING TRANSMEMBRANE ADAPTOR 1	0	KINASE
LINC00176	C20ORF204	CHROMOSOME 20 OPEN READING FRAME 204	0	NA
LINC00299	LINC00299	LONG INTERGENIC NON-PROTEIN CODING RNA 299	0	NA
LINC00332	LINC00332	LONG INTERGENIC NON-PROTEIN CODING RNA 332	0	NA
LINC00336	LINC00336	LONG INTERGENIC NON-PROTEIN CODING RNA 336	0	NA
LINC00449	LINC00449	LONG INTERGENIC NON-PROTEIN CODING RNA 449	0	NA
LINC00598	LINC00598	LONG INTERGENIC NON-PROTEIN CODING RNA 598	0	NA
LINC00708	LINC00708	LONG INTERGENIC NON-PROTEIN CODING RNA 708	0	NA
LINC01011	LINC01011	LONG INTERGENIC NON-PROTEIN CODING RNA 1011	0	NA
LINC01063	LINC01063	LONG INTERGENIC NON-PROTEIN CODING RNA 1063	0	NA
LINC01071	TUSC8	TUMOR SUPPRESSOR CANDIDATE 8 (NON-PROTEIN CODING)	0	NA
LIX1	LIX1	LIMB AND CNS EXPRESSED 1	0	NA
LMAN1L	LMAN1L	LECTIN, MANNOSE BINDING 1 LIKE	0	NA
LMAN2	LMAN2	LECTIN, MANNOSE BINDING 2	0	CELL SURFACE
LMTK3	LMTK3	LEMUR TYROSINE KINASE 3	0	KINASE,TYROSINE KINASE,DRUGGABLE GENOME
LPP	LPP	LIM DOMAIN CONTAINING PREFERRED TRANSLOCATION PARTNER IN LIPOMA	0	CLINICALLY ACTIONABLE
LRRC3C	LRRC3C	LEUCINE RICH REPEAT CONTAINING 3C	0	NA
LSM2	LSM2	LSM2 HOMOLOG, U6 SMALL NUCLEAR RNA AND MRNA DEGRADATION ASSOCIATED	0	NA
LSP1	LSP1	LYMPHOCYTE-SPECIFIC PROTEIN 1	0	NA
LY9	LY9	LYMPHOCYTE ANTIGEN 9	0	CELL SURFACE,DRUGGABLE GENOME
LYRM9	LYRM9	LYR MOTIF CONTAINING 9	0	NA
MAMSTR	MAMSTR	MEF2 ACTIVATING MOTIF AND SAP DOMAIN CONTAINING TRANSCRIPTIONAL REGULATOR	0	NA
MAN2A2	MAN2A2	MANNOSIDASE ALPHA CLASS 2A MEMBER 2	0	DRUGGABLE GENOME
MANBA	MANBA	MANNOSIDASE BETA	0	DRUGGABLE GENOME,ENZYME
MAP3K14	MAP3K14	MITOGEN-ACTIVATED PROTEIN KINASE KINASE KINASE 14	0	KINASE,SERINE THREONINE KINASE,DRUGGABLE GENOME,CLINICALLY ACTIONABLE,ENZYME
MAPKBP1	MAPKBP1	MITOGEN-ACTIVATED PROTEIN KINASE BINDING PROTEIN 1	0	KINASE
2022-03-06	MARCHF6	MEMBRANE ASSOCIATED RING-CH-TYPE FINGER 6	0	ENZYME
MCCD1	MCCD1	MITOCHONDRIAL COILED-COIL DOMAIN 1	0	NA
MDM1	MDM1	MDM1 NUCLEAR PROTEIN	0	NA
MDN1	MDN1	MIDASIN AAA ATPASE 1	0	NA
MED20	MED20	MEDIATOR COMPLEX SUBUNIT 20	0	NUCLEAR HORMONE RECEPTOR,TRANSCRIPTION FACTOR
METTL1	METTL1	METHYLTRANSFERASE LIKE 1	0	NA
METTL10	EEF1AKMT2	EEF1A LYSINE METHYLTRANSFERASE 2	0	NA
METTL21B	EEF1AKMT3	EEF1A LYSINE METHYLTRANSFERASE 3	0	NA
MFNG	MFNG	MFNG O-FUCOSYLPEPTIDE 3-BETA-N-ACETYLGLUCOSAMINYLTRANSFERASE	0	DRUGGABLE GENOME
MFSD7	SLC49A3	SOLUTE CARRIER FAMILY 49 MEMBER 3	0	DRUGGABLE GENOME
MGAT5	MGAT5	MANNOSYL (ALPHA-1,6-)-GLYCOPROTEIN BETA-1,6-N-ACETYL-GLUCOSAMINYLTRANSFERASE	0	ENZYME
MIDN	MIDN	MIDNOLIN	0	NA
MIEN1	MIEN1	MIGRATION AND INVASION ENHANCER 1	0	NA
MIF4GD	MIF4GD	MIF4G DOMAIN CONTAINING	0	NA
MIP	MIP	MAJOR INTRINSIC PROTEIN OF LENS FIBER	0	ION CHANNEL,PROTEASE,DRUGGABLE GENOME
MIR1205	MIR1205	MICRORNA 1205	0	NA
MIR1207	MIR1207	MICRORNA 1207	0	NA
MIR1208	MIR1208	MICRORNA 1208	0	NA
MIR1238	MIR1238	MICRORNA 1238	0	NA
MIR1255A	MIR1255A	MICRORNA 1255A	0	NA
MIR1284	MIR1284	MICRORNA 1284	0	NA
MIR130B	MIR130B	MICRORNA 130B	0	NA
MIR146B	MIR146B	MICRORNA 146B	0	NA
MIR150	MIR150	MICRORNA 150	0	NA
MIR1908	MIR1908	MICRORNA 1908	0	NA
MIR200A	MIR200A	MICRORNA 200A	0	NA
MIR200B	MIR200B	MICRORNA 200B	0	NA
MIR26B	MIR26B	MICRORNA 26B	0	NA
MIR301B	MIR301B	MICRORNA 301B	0	NA
MIR3135B	MIR3135B	MICRORNA 3135B	0	NA
MIR3155A	MIR3155A	MICRORNA 3155A	0	NA
MIR320D1	MIR320D1	MICRORNA 320D-1	0	NA
MIR3678	MIR3678	MICRORNA 3678	0	NA
MIR3679	MIR3679	MICRORNA 3679	0	NA
MIR3714	MIR3714	MICRORNA 3714	0	NA
MIR3918	MIR3918	MICRORNA 3918	0	NA
MIR3925	MIR3925	MICRORNA 3925	0	NA
MIR3934	MIR3934	MICRORNA 3934	0	NA
MIR3939	MIR3939	MICRORNA 3939	0	NA
MIR4258	MIR4258	MICRORNA 4258	0	NA
MIR429	MIR429	MICRORNA 429	0	NA
MIR4304	MIR4304	MICRORNA 4304	0	NA
MIR4425	MIR4425	MICRORNA 4425	0	NA
MIR4437	MIR4437	MICRORNA 4437	0	NA
MIR4464	MIR4464	MICRORNA 4464	0	NA
MIR4489	MIR4489	MICRORNA 4489	0	NA
MIR4492	MIR4492	MICRORNA 4492	0	NA
MIR4513	MIR4513	MICRORNA 4513	0	NA
MIR4519	MIR4519	MICRORNA 4519	0	NA
MIR4645	MIR4645	MICRORNA 4645	0	NA
MIR4647	MIR4647	MICRORNA 4647	0	NA
MIR4690	MIR4690	MICRORNA 4690	0	NA
MIR4728	MIR4728	MICRORNA 4728	0	NA
MIR4772	MIR4772	MICRORNA 4772	0	NA
MIR5192	MIR5192	MICRORNA 5192	0	NA
MIR548H2	MIR548H2	MICRORNA 548H-2	0	NA
MIR548P	MIR548P	MICRORNA 548P	0	NA
MIR611	MIR611	MICRORNA 611	0	NA
MIR623	MIR623	MICRORNA 623	0	NA
MIR638	MIR638	MICRORNA 638	0	NA
MLEC	MLEC	MALECTIN	0	NA
MMD	MMD	MONOCYTE TO MACROPHAGE DIFFERENTIATION ASSOCIATED	0	ION CHANNEL
MMEL1	MMEL1	MEMBRANE METALLOENDOPEPTIDASE LIKE 1	0	PROTEASE,DRUGGABLE GENOME
MORN1	MORN1	MORN REPEAT CONTAINING 1	0	NA
MPHOSPH9	MPHOSPH9	M-PHASE PHOSPHOPROTEIN 9	0	NA
MPV17	MPV17	MPV17, MITOCHONDRIAL INNER MEMBRANE PROTEIN	0	TRANSPORTER
MPZ	MPZ	MYELIN PROTEIN ZERO	0	DRUGGABLE GENOME
MRPL14	MRPL14	MITOCHONDRIAL RIBOSOMAL PROTEIN L14	0	NA
MRPL20	MRPL20	MITOCHONDRIAL RIBOSOMAL PROTEIN L20	0	NA
MRPL23	MRPL23	MITOCHONDRIAL RIBOSOMAL PROTEIN L23	0	NA
MRPL4	MRPL4	MITOCHONDRIAL RIBOSOMAL PROTEIN L4	0	NA
MRPL51	MRPL51	MITOCHONDRIAL RIBOSOMAL PROTEIN L51	0	NA
MRPS21	MRPS21	MITOCHONDRIAL RIBOSOMAL PROTEIN S21	0	NA
MRPS31	MRPS31	MITOCHONDRIAL RIBOSOMAL PROTEIN S31	0	NA
MRPS7	MRPS7	MITOCHONDRIAL RIBOSOMAL PROTEIN S7	0	NA
MTIF2	MTIF2	MITOCHONDRIAL TRANSLATIONAL INITIATION FACTOR 2	0	NA
MUS81	MUS81	MUS81 STRUCTURE-SPECIFIC ENDONUCLEASE SUBUNIT	0	DNA REPAIR
MXD3	MXD3	MAX DIMERIZATION PROTEIN 3	0	NA
MXRA8	MXRA8	MATRIX REMODELING ASSOCIATED 8	0	CELL SURFACE
MYL5	MYL5	MYOSIN LIGHT CHAIN 5	0	NA
MYL6	MYL6	MYOSIN LIGHT CHAIN 6	0	NA
MYOZ3	MYOZ3	MYOZENIN 3	0	NA
MYRF	MYRF	MYELIN REGULATORY FACTOR	0	PROTEASE,TRANSCRIPTION FACTOR
N4BP2	N4BP2	NEDD4 BINDING PROTEIN 2	0	KINASE
NABP1	NABP1	NUCLEIC ACID BINDING PROTEIN 1	0	DNA REPAIR
NABP2	NABP2	NUCLEIC ACID BINDING PROTEIN 2	0	DNA REPAIR
NCAPD2	NCAPD2	NON-SMC CONDENSIN I COMPLEX SUBUNIT D2	0	NA
NCMAP	NCMAP	NON-COMPACT MYELIN ASSOCIATED PROTEIN	0	NA
NCOA5	NCOA5	NUCLEAR RECEPTOR COACTIVATOR 5	0	NUCLEAR HORMONE RECEPTOR
NCR3	NCR3	NATURAL CYTOTOXICITY TRIGGERING RECEPTOR 3	0	DRUGGABLE GENOME
NDFIP1	NDFIP1	NEDD4 FAMILY INTERACTING PROTEIN 1	0	TRANSPORTER,DRUGGABLE GENOME,ENZYME
NDST1	NDST1	N-DEACETYLASE AND N-SULFOTRANSFERASE 1	0	ENZYME
NDST2	NDST2	N-DEACETYLASE AND N-SULFOTRANSFERASE 2	0	ENZYME
NEK7	NEK7	NIMA RELATED KINASE 7	0	KINASE,SERINE THREONINE KINASE,DRUGGABLE GENOME,ENZYME
NEK9	NEK9	NIMA RELATED KINASE 9	0	TRANSPORTER,KINASE,SERINE THREONINE KINASE,DRUGGABLE GENOME,ENZYME
NEU1	NEU1	NEURAMINIDASE 1	0	DRUGGABLE GENOME,ENZYME
NEUROD2	NEUROD2	NEURONAL DIFFERENTIATION 2	0	NA
NFIL3	NFIL3	NUCLEAR FACTOR, INTERLEUKIN 3 REGULATED	0	TRANSCRIPTION FACTOR
NFKBIL1	NFKBIL1	NFKB INHIBITOR LIKE 1	0	NA
NFXL1	NFXL1	NUCLEAR TRANSCRIPTION FACTOR, X-BOX BINDING LIKE 1	0	NA
NIPAL1	NIPAL1	NIPA LIKE DOMAIN CONTAINING 1	0	TRANSPORTER
NIPAL3	NIPAL3	NIPA LIKE DOMAIN CONTAINING 3	0	TRANSPORTER
NIT2	NIT2	NITRILASE FAMILY MEMBER 2	0	NA
NKD1	NKD1	NAKED CUTICLE HOMOLOG 1	0	NA
NOC2L	NOC2L	NOC2 LIKE NUCLEOLAR ASSOCIATED TRANSCRIPTIONAL REPRESSOR	0	NA
NOG	NOG	NOGGIN	0	DRUGGABLE GENOME
NOLC1	NOLC1	NUCLEOLAR AND COILED-BODY PHOSPHOPROTEIN 1	0	TRANSCRIPTION FACTOR BINDING,ENZYME
NOP2	NOP2	NOP2 NUCLEOLAR PROTEIN	0	NA
NOSIP	NOSIP	NITRIC OXIDE SYNTHASE INTERACTING PROTEIN	0	NA
NRBF2	NRBF2	NUCLEAR RECEPTOR BINDING FACTOR 2	0	KINASE,NUCLEAR HORMONE RECEPTOR
NRROS	NRROS	NEGATIVE REGULATOR OF REACTIVE OXYGEN SPECIES	0	CELL SURFACE
NRXN2	NRXN2	NEUREXIN 2	0	DRUGGABLE GENOME
NSD1	NSD1	NUCLEAR RECEPTOR BINDING SET DOMAIN PROTEIN 1	0	NUCLEAR HORMONE RECEPTOR,CLINICALLY ACTIONABLE,METHYL TRANSFERASE,ENZYME
NT5DC4	NT5DC4	5'-NUCLEOTIDASE DOMAIN CONTAINING 4	0	NA
NTN5	NTN5	NETRIN 5	0	NA
NUDT22	NUDT22	NUDIX HYDROLASE 22	0	NA
NUDT6	NUDT6	NUDIX HYDROLASE 6	0	NA
NUFIP1	NUFIP1	NUFIP1, FMR1 INTERACTING PROTEIN 1	0	NA
NUP188	NUP188	NUCLEOPORIN 188	0	TRANSPORTER
NUP43	NUP43	NUCLEOPORIN 43	0	NA
NUPR1	NUPR1	NUCLEAR PROTEIN 1, TRANSCRIPTIONAL REGULATOR	0	NA
OGFOD2	OGFOD2	2-OXOGLUTARATE AND IRON DEPENDENT OXYGENASE DOMAIN CONTAINING 2	0	NA
OLFM2	OLFM2	OLFACTOMEDIN 2	0	DRUGGABLE GENOME
ORMDL2	ORMDL2	ORMDL SPHINGOLIPID BIOSYNTHESIS REGULATOR 2	0	NA
OS9	OS9	OS9, ENDOPLASMIC RETICULUM LECTIN	0	NA
OVOL1	OVOL1	OVO LIKE TRANSCRIPTIONAL REPRESSOR 1	0	TRANSCRIPTION FACTOR
PA2G4	PA2G4	PROLIFERATION-ASSOCIATED 2G4	0	PROTEASE,DRUGGABLE GENOME
PAN2	PAN2	PAN2 POLY(A) SPECIFIC RIBONUCLEASE SUBUNIT	0	PROTEASE
PANK4	PANK4	PANTOTHENATE KINASE 4	0	KINASE,ENZYME
PAPD5	TENT4B	TERMINAL NUCLEOTIDYLTRANSFERASE 4B	0	TRANSPORTER
PAPOLG	PAPOLG	POLY(A) POLYMERASE GAMMA	0	ENZYME
PARK7	PARK7	PARKINSONISM ASSOCIATED DEGLYCASE	0	DNA REPAIR,HISTONE MODIFICATION,PROTEASE,TRANSCRIPTION FACTOR BINDING,ENZYME
PAXBP1	PAXBP1	PAX3 AND PAX7 BINDING PROTEIN 1	0	TRANSCRIPTION FACTOR BINDING,TRANSCRIPTION FACTOR
PAXBP1-AS1	PAXBP1-AS1	PAXBP1 ANTISENSE RNA 1	0	NA
PBXIP1	PBXIP1	PBX HOMEOBOX INTERACTING PROTEIN 1	0	TRANSCRIPTION FACTOR
PCAT1	PCAT1	PROSTATE CANCER ASSOCIATED TRANSCRIPT 1 (NON-PROTEIN CODING)	0	NA
PCAT2	PCAT2	PROSTATE CANCER ASSOCIATED TRANSCRIPT 2 (NON-PROTEIN CODING)	0	NA
PCDH12	PCDH12	PROTOCADHERIN 12	0	NA
PCGF3	PCGF3	POLYCOMB GROUP RING FINGER 3	0	NA
PCIF1	PCIF1	PDX1 C-TERMINAL INHIBITING FACTOR 1	0	NA
PCNP	PCNP	PEST PROTEOLYTIC SIGNAL CONTAINING NUCLEAR PROTEIN	0	NA
PCNXL3	PCNX3	PECANEX HOMOLOG 3	0	NA
PDHB	PDHB	PYRUVATE DEHYDROGENASE E1 BETA SUBUNIT	0	ENZYME
PDHX	PDHX	PYRUVATE DEHYDROGENASE COMPLEX COMPONENT X	0	KINASE
PDLIM7	PDLIM7	PDZ AND LIM DOMAIN 7	0	KINASE
PEPD	PEPD	PEPTIDASE D	0	PROTEASE,DRUGGABLE GENOME,ENZYME
PEX10	PEX10	PEROXISOMAL BIOGENESIS FACTOR 10	0	TRANSPORTER
PEX13	PEX13	PEROXISOMAL BIOGENESIS FACTOR 13	0	TRANSPORTER
PFKFB3	PFKFB3	6-PHOSPHOFRUCTO-2-KINASE/FRUCTOSE-2,6-BIPHOSPHATASE 3	0	KINASE,ENZYME
PFKL	PFKL	PHOSPHOFRUCTOKINASE, LIVER TYPE	0	KINASE,ENZYME
PFN3	PFN3	PROFILIN 3	0	NA
PGAP3	PGAP3	POST-GPI ATTACHMENT TO PROTEINS 3	0	NA
PGS1	PGS1	PHOSPHATIDYLGLYCEROPHOSPHATE SYNTHASE 1	0	NA
PHF19	PHF19	PHD FINGER PROTEIN 19	0	NA
PHF5A	PHF5A	PHD FINGER PROTEIN 5A	0	NA
PIGX	PIGX	PHOSPHATIDYLINOSITOL GLYCAN ANCHOR BIOSYNTHESIS CLASS X	0	NA
PIP4K2C	PIP4K2C	PHOSPHATIDYLINOSITOL-5-PHOSPHATE 4-KINASE TYPE 2 GAMMA	0	KINASE,DRUGGABLE GENOME,ENZYME
PITPNM2	PITPNM2	PHOSPHATIDYLINOSITOL TRANSFER PROTEIN MEMBRANE ASSOCIATED 2	0	NA
PITX3	PITX3	PAIRED LIKE HOMEODOMAIN 3	0	TRANSCRIPTION FACTOR
PKIA	PKIA	CAMP-DEPENDENT PROTEIN KINASE INHIBITOR ALPHA	0	KINASE,ENZYME
PLCB3	PLCB3	PHOSPHOLIPASE C BETA 3	0	PHOSPHOLIPASE,DRUGGABLE GENOME,ENZYME
PLCH2	PLCH2	PHOSPHOLIPASE C ETA 2	0	PHOSPHOLIPASE,DRUGGABLE GENOME,ENZYME
PLCL1	PLCL1	PHOSPHOLIPASE C LIKE 1 (INACTIVE)	0	PHOSPHOLIPASE,DRUGGABLE GENOME
PLCL2	PLCL2	PHOSPHOLIPASE C LIKE 2	0	PHOSPHOLIPASE,DRUGGABLE GENOME
PLEKHA1	PLEKHA1	PLECKSTRIN HOMOLOGY DOMAIN CONTAINING A1	0	NA
PLEKHA4	PLEKHA4	PLECKSTRIN HOMOLOGY DOMAIN CONTAINING A4	0	NA
PLEKHG6	PLEKHG6	PLECKSTRIN HOMOLOGY AND RHOGEF DOMAIN CONTAINING G6	0	NA
PLEKHN1	PLEKHN1	PLECKSTRIN HOMOLOGY DOMAIN CONTAINING N1	0	NA
PMM1	PMM1	PHOSPHOMANNOMUTASE 1	0	NA
PMVK	PMVK	PHOSPHOMEVALONATE KINASE	0	KINASE,ENZYME
PNKD	PNKD	PAROXYSMAL NONKINESIGENIC DYSKINESIA	0	NA
PNPT1	PNPT1	POLYRIBONUCLEOTIDE NUCLEOTIDYLTRANSFERASE 1	0	ENZYME
POGZ	POGZ	POGO TRANSPOSABLE ELEMENT DERIVED WITH ZNF DOMAIN	0	KINASE,TRANSCRIPTION FACTOR
POLR2E	POLR2E	RNA POLYMERASE II SUBUNIT E	0	NA
POLR3A	POLR3A	RNA POLYMERASE III SUBUNIT A	0	ENZYME
POLR3H	POLR3H	RNA POLYMERASE III SUBUNIT H	0	NA
PPDPF	PPDPF	PANCREATIC PROGENITOR CELL DIFFERENTIATION AND PROLIFERATION FACTOR	0	NA
PPIF	PPIF	PEPTIDYLPROLYL ISOMERASE F	0	DRUGGABLE GENOME
PPIL2	PPIL2	PEPTIDYLPROLYL ISOMERASE LIKE 2	0	DRUGGABLE GENOME
PPIL4	PPIL4	PEPTIDYLPROLYL ISOMERASE LIKE 4	0	DRUGGABLE GENOME
PPM1G	PPM1G	PROTEIN PHOSPHATASE, MG2+/MN2+ DEPENDENT 1G	0	NA
PPP1R14B	PPP1R14B	PROTEIN PHOSPHATASE 1 REGULATORY INHIBITOR SUBUNIT 14B	0	NA
PPP2R1B	PPP2R1B	PROTEIN PHOSPHATASE 2 SCAFFOLD SUBUNIT ABETA	0	ENZYME
PPP2R3C	PPP2R3C	PROTEIN PHOSPHATASE 2 REGULATORY SUBUNIT B''GAMMA	0	TRANSPORTER
PPRC1	PPRC1	PEROXISOME PROLIFERATOR-ACTIVATED RECEPTOR GAMMA, COACTIVATOR-RELATED 1	0	TRANSCRIPTION FACTOR BINDING
PRDM1	PRDM1	PR/SET DOMAIN 1	0	CLINICALLY ACTIONABLE,METHYL TRANSFERASE,TRANSCRIPTION FACTOR
PRDX6	PRDX6	PEROXIREDOXIN 6	0	ENZYME
PRELID1	PRELID1	PRELI DOMAIN CONTAINING 1	0	TRANSPORTER
PRICKLE4	PRICKLE4	PRICKLE PLANAR CELL POLARITY PROTEIN 4	0	NA
PRKCQ-AS1	PRKCQ-AS1	PRKCQ ANTISENSE RNA 1	0	NA
PRM1	PRM1	PROTAMINE 1	0	NA
PRM2	PRM2	PROTAMINE 2	0	NA
PRM3	PRM3	PROTAMINE 3	0	NA
PRMT7	PRMT7	PROTEIN ARGININE METHYLTRANSFERASE 7	0	METHYL TRANSFERASE,ENZYME
PRPF19	PRPF19	PRE-MRNA PROCESSING FACTOR 19	0	NA
PRPF3	PRPF3	PRE-MRNA PROCESSING FACTOR 3	0	NA
PRPF6	PRPF6	PRE-MRNA PROCESSING FACTOR 6	0	NA
PRR12	PRR12	PROLINE RICH 12	0	NA
PRR5L	PRR5L	PROLINE RICH 5 LIKE	0	NA
PRR7	PRR7	PROLINE RICH 7, SYNAPTIC	0	TRANSCRIPTION FACTOR
PRR7-AS1	PRR7-AS1	PRR7 ANTISENSE RNA 1	0	NA
PRRG2	PRRG2	PROLINE RICH AND GLA DOMAIN 2	0	NA
PRSS36	PRSS36	PROTEASE, SERINE 36	0	PROTEASE,DRUGGABLE GENOME
PSD	PSD	PLECKSTRIN AND SEC7 DOMAIN CONTAINING	0	NA
PSMD5-AS1	CUTALP	CUTA DIVALENT CATION TOLERANCE LIKE, PSEUDOGENE	0	NA
PSORS1C2	PSORS1C2	PSORIASIS SUSCEPTIBILITY 1 CANDIDATE 2	0	NA
PSTK	PSTK	PHOSPHOSERYL-TRNA KINASE	0	KINASE
PTPN2	PTPN2	PROTEIN TYROSINE PHOSPHATASE, NON-RECEPTOR TYPE 2	0	PROTEIN PHOSPHATASE,KINASE,DRUGGABLE GENOME,CLINICALLY ACTIONABLE
PTPRK	PTPRK	PROTEIN TYROSINE PHOSPHATASE, RECEPTOR TYPE K	0	PROTEIN PHOSPHATASE,CELL SURFACE,DRUGGABLE GENOME
PUS10	PUS10	PSEUDOURIDYLATE SYNTHASE 10	0	ENZYME
PUSL1	PUSL1	PSEUDOURIDYLATE SYNTHASE-LIKE 1	0	NA
PXK	PXK	PX DOMAIN CONTAINING SERINE/THREONINE KINASE LIKE	0	KINASE,SERINE THREONINE KINASE,DRUGGABLE GENOME,ENZYME
PXT1	PXT1	PEROXISOMAL, TESTIS SPECIFIC 1	0	NA
PYGO2	PYGO2	PYGOPUS FAMILY PHD FINGER 2	0	NA
QTRT1	QTRT1	QUEUINE TRNA-RIBOSYLTRANSFERASE CATALYTIC SUBUNIT 1	0	ENZYME
R3HDM4	R3HDM4	R3H DOMAIN CONTAINING 4	0	NA
RAB19	RAB19	RAB19, MEMBER RAS ONCOGENE FAMILY	0	NA
RAB24	RAB24	RAB24, MEMBER RAS ONCOGENE FAMILY	0	NA
RAB3IL1	RAB3IL1	RAB3A INTERACTING PROTEIN LIKE 1	0	KINASE
RAB5B	RAB5B	RAB5B, MEMBER RAS ONCOGENE FAMILY	0	NA
RAD1	RAD1	RAD1 CHECKPOINT DNA EXONUCLEASE	0	DNA REPAIR
RAD51B	RAD51B	RAD51 PARALOG B	0	DNA REPAIR,CLINICALLY ACTIONABLE
RANBP1	RANBP1	RAN BINDING PROTEIN 1	0	NA
RAPH1	RAPH1	RAS ASSOCIATION (RALGDS/AF-6) AND PLECKSTRIN HOMOLOGY DOMAINS 1	0	NA
RASA2	RASA2	RAS P21 PROTEIN ACTIVATOR 2	0	NA
RASA2-IT1	RASA2-IT1	RASA2 INTRONIC TRANSCRIPT 1	0	NA
RASIP1	RASIP1	RAS INTERACTING PROTEIN 1	0	NA
RBM17	RBM17	RNA BINDING MOTIF PROTEIN 17	0	NA
RBM22	RBM22	RNA BINDING MOTIF PROTEIN 22	0	NA
RBPJ	RBPJ	RECOMBINATION SIGNAL BINDING PROTEIN FOR IMMUNOGLOBULIN KAPPA J REGION	0	TRANSCRIPTION FACTOR BINDING
RC3H1	RC3H1	RING FINGER AND CCCH-TYPE DOMAINS 1	0	ENZYME
RCAN3	RCAN3	RCAN FAMILY MEMBER 3	0	NA
RCOR1	RCOR1	REST COREPRESSOR 1	0	TRANSCRIPTION FACTOR COMPLEX,TRANSCRIPTION FACTOR
RDH5	RDH5	RETINOL DEHYDROGENASE 5	0	DRUGGABLE GENOME,SHORT CHAIN DEHYDROGENASE REDUCTASE,ENZYME
REL	REL	REL PROTO-ONCOGENE, NF-KB SUBUNIT	0	TRANSCRIPTION FACTOR COMPLEX,KINASE,DRUGGABLE GENOME,CLINICALLY ACTIONABLE,TRANSCRIPTION FACTOR
RER1	RER1	RETENTION IN ENDOPLASMIC RETICULUM SORTING RECEPTOR 1	0	CELL SURFACE
RERE	RERE	ARGININE-GLUTAMIC ACID DIPEPTIDE REPEATS	0	TRANSCRIPTION FACTOR
RGS1	RGS1	REGULATOR OF G PROTEIN SIGNALING 1	0	NA
RGS14	RGS14	REGULATOR OF G PROTEIN SIGNALING 14	0	NA
RGS19	RGS19	REGULATOR OF G PROTEIN SIGNALING 19	0	NA
RHOH	RHOH	RAS HOMOLOG FAMILY MEMBER H	0	CLINICALLY ACTIONABLE,ENZYME
RIOK2	RIOK2	RIO KINASE 2	0	KINASE,SERINE THREONINE KINASE,DRUGGABLE GENOME,ENZYME
RMI2	RMI2	RECQ MEDIATED GENOME INSTABILITY 2	0	DNA REPAIR,CLINICALLY ACTIONABLE
RN7SKP110	RN7SKP110	RNA, 7SK SMALL NUCLEAR PSEUDOGENE 110	0	NA
RN7SKP160	RN7SKP160	RNA, 7SK SMALL NUCLEAR PSEUDOGENE 160	0	NA
RN7SKP2	RN7SKP2	RNA, 7SK SMALL NUCLEAR PSEUDOGENE 2	0	NA
RN7SKP214	RN7SKP214	RNA, 7SK SMALL NUCLEAR PSEUDOGENE 214	0	NA
RN7SKP226	RN7SKP226	RNA, 7SK SMALL NUCLEAR PSEUDOGENE 226	0	NA
RN7SKP78	RN7SKP78	RNA, 7SK SMALL NUCLEAR PSEUDOGENE 78	0	NA
RN7SKP9	RN7SKP9	RNA, 7SK SMALL NUCLEAR PSEUDOGENE 9	0	NA
RN7SL108P	RN7SL108P	RNA, 7SL, CYTOPLASMIC 108, PSEUDOGENE	0	NA
RN7SL160P	RN7SL160P	RNA, 7SL, CYTOPLASMIC 160, PSEUDOGENE	0	NA
RN7SL174P	RN7SL174P	RNA, 7SL, CYTOPLASMIC 174, PSEUDOGENE	0	NA
RN7SL178P	RN7SL178P	RNA, 7SL, CYTOPLASMIC 178, PSEUDOGENE	0	NA
RN7SL309P	RN7SL309P	RNA, 7SL, CYTOPLASMIC 309, PSEUDOGENE	0	NA
RN7SL332P	RN7SL332P	RNA, 7SL, CYTOPLASMIC 332, PSEUDOGENE	0	NA
RN7SL341P	RN7SL341P	RNA, 7SL, CYTOPLASMIC 341, PSEUDOGENE	0	NA
RN7SL363P	RN7SL363P	RNA, 7SL, CYTOPLASMIC 363, PSEUDOGENE	0	NA
RN7SL391P	RN7SL391P	RNA, 7SL, CYTOPLASMIC 391, PSEUDOGENE	0	NA
RN7SL561P	RN7SL561P	RNA, 7SL, CYTOPLASMIC 561, PSEUDOGENE	0	NA
RN7SL632P	RN7SL632P	RNA, 7SL, CYTOPLASMIC 632, PSEUDOGENE	0	NA
RN7SL635P	RN7SL635P	RNA, 7SL, CYTOPLASMIC 635, PSEUDOGENE	0	NA
RN7SL657P	RN7SL657P	RNA, 7SL, CYTOPLASMIC 657, PSEUDOGENE	0	NA
RN7SL688P	RN7SL688P	RNA, 7SL, CYTOPLASMIC 688, PSEUDOGENE	0	NA
RN7SL69P	RN7SL69P	RNA, 7SL, CYTOPLASMIC 69, PSEUDOGENE	0	NA
RN7SL706P	RN7SL706P	RNA, 7SL, CYTOPLASMIC 706, PSEUDOGENE	0	NA
RN7SL708P	RN7SL708P	RNA, 7SL, CYTOPLASMIC 708, PSEUDOGENE	0	NA
RN7SL728P	RN7SL728P	RNA, 7SL, CYTOPLASMIC 728, PSEUDOGENE	0	NA
RN7SL736P	RN7SL736P	RNA, 7SL, CYTOPLASMIC 736, PSEUDOGENE	0	NA
RN7SL748P	RN7SL748P	RNA, 7SL, CYTOPLASMIC 748, PSEUDOGENE	0	NA
RN7SL784P	RN7SL784P	RNA, 7SL, CYTOPLASMIC 784, PSEUDOGENE	0	NA
RN7SL834P	RN7SL834P	RNA, 7SL, CYTOPLASMIC 834, PSEUDOGENE	0	NA
RNA5SP104	RNA5SP104	RNA, 5S RIBOSOMAL PSEUDOGENE 104	0	NA
RNA5SP122	RNA5SP122	RNA, 5S RIBOSOMAL PSEUDOGENE 122	0	NA
RNA5SP309	RNA5SP309	RNA, 5S RIBOSOMAL PSEUDOGENE 309	0	NA
RNA5SP397	RNA5SP397	RNA, 5S RIBOSOMAL PSEUDOGENE 397	0	NA
RNA5SP443	RNA5SP443	RNA, 5S RIBOSOMAL PSEUDOGENE 443	0	NA
RNA5SP95	RNA5SP95	RNA, 5S RIBOSOMAL PSEUDOGENE 95	0	NA
RNASEH2C	RNASEH2C	RIBONUCLEASE H2 SUBUNIT C	0	NA
RNASET2	RNASET2	RIBONUCLEASE T2	0	DRUGGABLE GENOME
RNF14	RNF14	RING FINGER PROTEIN 14	0	ENZYME
RNF223	RNF223	RING FINGER PROTEIN 223	0	NA
RNF25	RNF25	RING FINGER PROTEIN 25	0	ENZYME
RNF40	RNF40	RING FINGER PROTEIN 40	0	ENZYME
RNF41	RNF41	RING FINGER PROTEIN 41	0	NA
RNU1-106P	RNVU1-32	RNA, VARIANT U1 SMALL NUCLEAR 32	0	NA
RNU1-150P	RNU1-150P	RNA, U1 SMALL NUCLEAR 150, PSEUDOGENE	0	NA
RNU1-27P	RNU1-27P	RNA, U1 SMALL NUCLEAR 27, PSEUDOGENE	0	NA
RNU1-58P	RNU1-58P	RNA, U1 SMALL NUCLEAR 58, PSEUDOGENE	0	NA
RNU1-61P	RNU1-61P	RNA, U1 SMALL NUCLEAR 61, PSEUDOGENE	0	NA
RNU1-73P	RNU1-73P	RNA, U1 SMALL NUCLEAR 73, PSEUDOGENE	0	NA
RNU4-25P	RNU4-25P	RNA, U4 SMALL NUCLEAR 25, PSEUDOGENE	0	NA
RNU4-42P	RNU4-42P	RNA, U4 SMALL NUCLEAR 42, PSEUDOGENE	0	NA
RNU5A-3P	RNU5A-3P	RNA, U5A SMALL NUCLEAR 3, PSEUDOGENE	0	NA
RNU6-107P	RNU6-107P	RNA, U6 SMALL NUCLEAR 107, PSEUDOGENE	0	NA
RNU6-1091P	RNU6-1091P	RNA, U6 SMALL NUCLEAR 1091, PSEUDOGENE	0	NA
RNU6-1167P	RNU6-1167P	RNA, U6 SMALL NUCLEAR 1167, PSEUDOGENE	0	NA
RNU6-1243P	RNU6-1243P	RNA, U6 SMALL NUCLEAR 1243, PSEUDOGENE	0	NA
RNU6-1316P	RNU6-1316P	RNA, U6 SMALL NUCLEAR 1316, PSEUDOGENE	0	NA
RNU6-178P	RNU6-178P	RNA, U6 SMALL NUCLEAR 178, PSEUDOGENE	0	NA
RNU6-2	RNU6-2	RNA, U6 SMALL NUCLEAR 2	0	NA
RNU6-299P	RNU6-299P	RNA, U6 SMALL NUCLEAR 299, PSEUDOGENE	0	NA
RNU6-317P	RNU6-317P	RNA, U6 SMALL NUCLEAR 317, PSEUDOGENE	0	NA
RNU6-376P	RNU6-376P	RNA, U6 SMALL NUCLEAR 376, PSEUDOGENE	0	NA
RNU6-387P	RNU6-387P	RNA, U6 SMALL NUCLEAR 387, PSEUDOGENE	0	NA
RNU6-451P	RNU6-451P	RNA, U6 SMALL NUCLEAR 451, PSEUDOGENE	0	NA
RNU6-474P	RNU6-474P	RNA, U6 SMALL NUCLEAR 474, PSEUDOGENE	0	NA
RNU6-481P	RNU6-481P	RNA, U6 SMALL NUCLEAR 481, PSEUDOGENE	0	NA
RNU6-509P	RNU6-509P	RNA, U6 SMALL NUCLEAR 509, PSEUDOGENE	0	NA
RNU6-543P	RNU6-543P	RNA, U6 SMALL NUCLEAR 543, PSEUDOGENE	0	NA
RNU6-612P	RNU6-612P	RNA, U6 SMALL NUCLEAR 612, PSEUDOGENE	0	NA
RNU6-645P	RNU6-645P	RNA, U6 SMALL NUCLEAR 645, PSEUDOGENE	0	NA
RNU6-646P	RNU6-646P	RNA, U6 SMALL NUCLEAR 646, PSEUDOGENE	0	NA
RNU6-693P	RNU6-693P	RNA, U6 SMALL NUCLEAR 693, PSEUDOGENE	0	NA
RNU6-700P	RNU6-700P	RNA, U6 SMALL NUCLEAR 700, PSEUDOGENE	0	NA
RNU6-761P	RNU6-761P	RNA, U6 SMALL NUCLEAR 761, PSEUDOGENE	0	NA
RNU6-794P	RNU6-794P	RNA, U6 SMALL NUCLEAR 794, PSEUDOGENE	0	NA
RNU6-835P	RNU6-835P	RNA, U6 SMALL NUCLEAR 835, PSEUDOGENE	0	NA
RNU6-838P	RNU6-838P	RNA, U6 SMALL NUCLEAR 838, PSEUDOGENE	0	NA
RNU6-869P	RNU6-869P	RNA, U6 SMALL NUCLEAR 869, PSEUDOGENE	0	NA
RNU6-921P	RNU6-921P	RNA, U6 SMALL NUCLEAR 921, PSEUDOGENE	0	NA
RNU6-933P	RNU6-933P	RNA, U6 SMALL NUCLEAR 933, PSEUDOGENE	0	NA
RNU6-938P	RNU6-938P	RNA, U6 SMALL NUCLEAR 938, PSEUDOGENE	0	NA
RNU7-130P	RNU7-130P	RNA, U7 SMALL NUCLEAR 130 PSEUDOGENE	0	NA
RNU7-135P	RNU7-125P	RNA, U7 SMALL NUCLEAR 125 PSEUDOGENE	0	NA
RNU7-140P	RNU7-140P	RNA, U7 SMALL NUCLEAR 140 PSEUDOGENE	0	NA
RNU7-3P	RNU7-3P	RNA, U7 SMALL NUCLEAR 3 PSEUDOGENE	0	NA
RNU7-57P	RNU7-57P	RNA, U7 SMALL NUCLEAR 57 PSEUDOGENE	0	NA
RNU7-77P	RNU7-77P	RNA, U7 SMALL NUCLEAR 77 PSEUDOGENE	0	NA
RNY3P9	RNY3P9	RNA, RO-ASSOCIATED Y3 PSEUDOGENE 9	0	NA
RNY4P14	RNY4P14	RNA, RO-ASSOCIATED Y4 PSEUDOGENE 14	0	NA
ROPN1L	ROPN1L	RHOPHILIN ASSOCIATED TAIL PROTEIN 1 LIKE	0	KINASE
ROPN1L-AS1	ROPN1L-AS1	ROPN1L ANTISENSE RNA 1	0	NA
RPAP3	RPAP3	RNA POLYMERASE II ASSOCIATED PROTEIN 3	0	ENZYME
RPL13A	RPL13A	RIBOSOMAL PROTEIN L13A	0	NA
RPL18	RPL18	RIBOSOMAL PROTEIN L18	0	NA
RPL41	RPL41	RIBOSOMAL PROTEIN L41	0	KINASE
RPP14	RPP14	RIBONUCLEASE P/MRP SUBUNIT P14	0	NA
RPP25	RPP25	RIBONUCLEASE P AND MRP SUBUNIT P25	0	NA
RPRD2	RPRD2	REGULATION OF NUCLEAR PRE-MRNA DOMAIN CONTAINING 2	0	NA
RPS11	RPS11	RIBOSOMAL PROTEIN S11	0	NA
RPS14	RPS14	RIBOSOMAL PROTEIN S14	0	NA
RPS24	RPS24	RIBOSOMAL PROTEIN S24	0	NA
RPS26	RPS26	RIBOSOMAL PROTEIN S26	0	NA
RPS27A	RPS27A	RIBOSOMAL PROTEIN S27A	0	KINASE,TRANSCRIPTION FACTOR
RQCD1	CNOT9	CCR4-NOT TRANSCRIPTION COMPLEX SUBUNIT 9	0	NA
RRAS	RRAS	RAS RELATED	0	NA
RSPH3	RSPH3	RADIAL SPOKE HEAD 3 HOMOLOG	0	KINASE
RTEL1	RTEL1	REGULATOR OF TELOMERE ELONGATION HELICASE 1	0	DNA REPAIR,ENZYME
RTEL1-TNFRSF6B	RTEL1-TNFRSF6B	RTEL1-TNFRSF6B READTHROUGH (NMD CANDIDATE)	0	NA
RTF1	RTF1	RTF1 HOMOLOG, PAF1/RNA POLYMERASE II COMPLEX COMPONENT	0	ENZYME
RTTN	RTTN	ROTATIN	0	NA
RUVBL2	RUVBL2	RUVB LIKE AAA ATPASE 2	0	DNA REPAIR
RYBP	RYBP	RING1 AND YY1 BINDING PROTEIN	0	DRUGGABLE GENOME,CLINICALLY ACTIONABLE
SAMD10	SAMD10	STERILE ALPHA MOTIF DOMAIN CONTAINING 10	0	NA
SAMD8	SAMD8	STERILE ALPHA MOTIF DOMAIN CONTAINING 8	0	ENZYME
SARNP	SARNP	SAP DOMAIN CONTAINING RIBONUCLEOPROTEIN	0	NA
SART1	SART1	SART1, U4/U6.U5 TRI-SNRNP-ASSOCIATED PROTEIN 1	0	NA
SATB1	SATB1	SATB HOMEOBOX 1	0	ENZYME
SBNO2	SBNO2	STRAWBERRY NOTCH HOMOLOG 2	0	TRANSCRIPTION FACTOR
SCAF1	SCAF1	SR-RELATED CTD ASSOCIATED FACTOR 1	0	NA
SCAMP2	SCAMP2	SECRETORY CARRIER MEMBRANE PROTEIN 2	0	NA
SCAMP5	SCAMP5	SECRETORY CARRIER MEMBRANE PROTEIN 5	0	NA
SCARNA10	SCARNA10	SMALL CAJAL BODY-SPECIFIC RNA 10	0	NA
SCARNA5	SCARNA5	SMALL CAJAL BODY-SPECIFIC RNA 5	0	NA
SCARNA6	SCARNA6	SMALL CAJAL BODY-SPECIFIC RNA 6	0	NA
SDF2L1	SDF2L1	STROMAL CELL DERIVED FACTOR 2 LIKE 1	0	NA
SDHAF2	SDHAF2	SUCCINATE DEHYDROGENASE COMPLEX ASSEMBLY FACTOR 2	0	CLINICALLY ACTIONABLE,ENZYME
SDHC	SDHC	SUCCINATE DEHYDROGENASE COMPLEX SUBUNIT C	0	CLINICALLY ACTIONABLE,ENZYME
SEC24C	SEC24C	SEC24 HOMOLOG C, COPII COAT COMPLEX COMPONENT	0	NA
SERAC1	SERAC1	SERINE ACTIVE SITE CONTAINING 1	0	NA
SERBP1	SERBP1	SERPINE1 MRNA BINDING PROTEIN 1	0	NA
SERPINB1	SERPINB1	SERPIN FAMILY B MEMBER 1	0	PROTEASE INHIBITOR,DRUGGABLE GENOME
SERPINB6	SERPINB6	SERPIN FAMILY B MEMBER 6	0	PROTEASE INHIBITOR,DRUGGABLE GENOME
SERTAD2	SERTAD2	SERTA DOMAIN CONTAINING 2	0	TRANSCRIPTION FACTOR
SESN3	SESN3	SESTRIN 3	0	KINASE,TRANSCRIPTION FACTOR
SETD1A	SETD1A	SET DOMAIN CONTAINING 1A	0	TRANSCRIPTION FACTOR BINDING,METHYL TRANSFERASE,ENZYME
SFXN2	SFXN2	SIDEROFLEXIN 2	0	TRANSPORTER
SGK223	PRAG1	PEAK1 RELATED, KINASE-ACTIVATING PSEUDOKINASE 1	0	KINASE,SERINE THREONINE KINASE,ENZYME
SH2D4B	SH2D4B	SH2 DOMAIN CONTAINING 4B	0	NA
SHC1	SHC1	SHC ADAPTOR PROTEIN 1	0	KINASE
SHE	SHE	SRC HOMOLOGY 2 DOMAIN CONTAINING E	0	NA
SHQ1	SHQ1	SHQ1, H/ACA RIBONUCLEOPROTEIN ASSEMBLY FACTOR	0	CLINICALLY ACTIONABLE
SHROOM1	SHROOM1	SHROOM FAMILY MEMBER 1	0	NA
SIN3A	SIN3A	SIN3 TRANSCRIPTION REGULATOR FAMILY MEMBER A	0	NA
SIPA1	SIPA1	SIGNAL-INDUCED PROLIFERATION-ASSOCIATED 1	0	NA
SIRPD	SIRPD	SIGNAL REGULATORY PROTEIN DELTA	0	NA
SIRPG	SIRPG	SIGNAL REGULATORY PROTEIN GAMMA	0	KINASE,DRUGGABLE GENOME
SKI	SKI	SKI PROTO-ONCOGENE	0	TRANSCRIPTION FACTOR COMPLEX
SKIV2L	SKIV2L	SKI2 LIKE RNA HELICASE	0	NA
SLAMF6	SLAMF6	SLAM FAMILY MEMBER 6	0	DRUGGABLE GENOME
SLC11A1	SLC11A1	SOLUTE CARRIER FAMILY 11 MEMBER 1	0	TRANSPORTER,ENZYME
SLC13A3	SLC13A3	SOLUTE CARRIER FAMILY 13 MEMBER 3	0	TRANSPORTER,EXTERNAL SIDE OF PLASMA MEMBRANE,DRUGGABLE GENOME
SLC15A3	SLC15A3	SOLUTE CARRIER FAMILY 15 MEMBER 3	0	TRANSPORTER,DRUGGABLE GENOME
SLC17A7	SLC17A7	SOLUTE CARRIER FAMILY 17 MEMBER 7	0	TRANSPORTER,DRUGGABLE GENOME
SLC25A15	SLC25A15	SOLUTE CARRIER FAMILY 25 MEMBER 15	0	TRANSPORTER,DRUGGABLE GENOME
SLC25A19	SLC25A19	SOLUTE CARRIER FAMILY 25 MEMBER 19	0	TRANSPORTER,DRUGGABLE GENOME
SLC26A1	SLC26A1	SOLUTE CARRIER FAMILY 26 MEMBER 1	0	TRANSPORTER,ION CHANNEL
SLC2A4RG	SLC2A4RG	SLC2A4 REGULATOR	0	TRANSCRIPTION FACTOR
SLC34A1	SLC34A1	SOLUTE CARRIER FAMILY 34 MEMBER 1	0	TRANSPORTER,CELL SURFACE,DRUG RESISTANCE
SLC35C2	SLC35C2	SOLUTE CARRIER FAMILY 35 MEMBER C2	0	TRANSPORTER
SLC37A3	SLC37A3	SOLUTE CARRIER FAMILY 37 MEMBER 3	0	TRANSPORTER,DRUGGABLE GENOME
SLC37A4	SLC37A4	SOLUTE CARRIER FAMILY 37 MEMBER 4	0	TRANSPORTER,DRUGGABLE GENOME
SLC38A1	SLC38A1	SOLUTE CARRIER FAMILY 38 MEMBER 1	0	TRANSPORTER
SLC39A5	SLC39A5	SOLUTE CARRIER FAMILY 39 MEMBER 5	0	TRANSPORTER,DRUGGABLE GENOME,ENZYME
SLC44A2	SLC44A2	SOLUTE CARRIER FAMILY 44 MEMBER 2	0	TRANSPORTER
SLC45A1	SLC45A1	SOLUTE CARRIER FAMILY 45 MEMBER 1	0	TRANSPORTER
SLC48A1	SLC48A1	SOLUTE CARRIER FAMILY 48 MEMBER 1	0	TRANSPORTER
SLC50A1	SLC50A1	SOLUTE CARRIER FAMILY 50 MEMBER 1	0	TRANSPORTER
SLC9A2	SLC9A2	SOLUTE CARRIER FAMILY 9 MEMBER A2	0	TRANSPORTER,DRUGGABLE GENOME,EXCHANGER
SLC9B1	SLC9B1	SOLUTE CARRIER FAMILY 9 MEMBER B1	0	TRANSPORTER,DRUGGABLE GENOME,EXCHANGER
SLC9B2	SLC9B2	SOLUTE CARRIER FAMILY 9 MEMBER B2	0	TRANSPORTER,DRUGGABLE GENOME,EXCHANGER
SMARCC2	SMARCC2	SWI/SNF RELATED, MATRIX ASSOCIATED, ACTIN DEPENDENT REGULATOR OF CHROMATIN SUBFAMILY C MEMBER 2	0	TRANSCRIPTION FACTOR
SMARCE1	SMARCE1	SWI/SNF RELATED, MATRIX ASSOCIATED, ACTIN DEPENDENT REGULATOR OF CHROMATIN, SUBFAMILY E, MEMBER 1	0	CLINICALLY ACTIONABLE
SMC3	SMC3	STRUCTURAL MAINTENANCE OF CHROMOSOMES 3	0	DNA REPAIR,DRUGGABLE GENOME,CLINICALLY ACTIONABLE
SMIM3	SMIM3	SMALL INTEGRAL MEMBRANE PROTEIN 3	0	NA
SMNDC1	SMNDC1	SURVIVAL MOTOR NEURON DOMAIN CONTAINING 1	0	NA
SMPD3	SMPD3	SPHINGOMYELIN PHOSPHODIESTERASE 3	0	PHOSPHOLIPASE,DRUGGABLE GENOME,ENZYME
SNAPC1	SNAPC1	SMALL NUCLEAR RNA ACTIVATING COMPLEX POLYPEPTIDE 1	0	NA
SNAPC4	SNAPC4	SMALL NUCLEAR RNA ACTIVATING COMPLEX POLYPEPTIDE 4	0	NA
SNORA38	SNORA38	SMALL NUCLEOLAR RNA, H/ACA BOX 38	0	NA
SNORA48	SNORA48	SMALL NUCLEOLAR RNA, H/ACA BOX 48	0	NA
SNORA51	SNORA51	SMALL NUCLEOLAR RNA, H/ACA BOX 51	0	NA
SNORA63	SNORA63	SMALL NUCLEOLAR RNA, H/ACA BOX 63	0	NA
SNORA70	SNORA70	SMALL NUCLEOLAR RNA, H/ACA BOX 70	0	NA
SNORA76	SNORA50C	SMALL NUCLEOLAR RNA, H/ACA BOX 50C	0	NA
SNORA77	SNORA77	SMALL NUCLEOLAR RNA, H/ACA BOX 77	0	NA
SNORA8	SNORA8	SMALL NUCLEOLAR RNA, H/ACA BOX 8	0	NA
SNORD117	SNORD117	SMALL NUCLEOLAR RNA, C/D BOX 117	0	NA
SNORD32A	SNORD32A	SMALL NUCLEOLAR RNA, C/D BOX 32A	0	NA
SNORD33	SNORD33	SMALL NUCLEOLAR RNA, C/D BOX 33	0	NA
SNORD34	SNORD34	SMALL NUCLEOLAR RNA, C/D BOX 34	0	NA
SNORD35A	SNORD35A	SMALL NUCLEOLAR RNA, C/D BOX 35A	0	NA
SNORD35B	SNORD35B	SMALL NUCLEOLAR RNA, C/D BOX 35B	0	NA
SNORD48	SNORD48	SMALL NUCLEOLAR RNA, C/D BOX 48	0	NA
SNORD52	SNORD52	SMALL NUCLEOLAR RNA, C/D BOX 52	0	NA
SNORD78	SNORD78	SMALL NUCLEOLAR RNA, C/D BOX 78	0	NA
SNORD84	SNORD84	SMALL NUCLEOLAR RNA, C/D BOX 84	0	NA
SNRPG	SNRPG	SMALL NUCLEAR RIBONUCLEOPROTEIN POLYPEPTIDE G	0	NA
SNX17	SNX17	SORTING NEXIN 17	0	NA
SNX20	SNX20	SORTING NEXIN 20	0	NA
SNX27	SNX27	SORTING NEXIN FAMILY MEMBER 27	0	NA
SNX32	SNX32	SORTING NEXIN 32	0	NA
SNX6	SNX6	SORTING NEXIN 6	0	KINASE,ENZYME
SON	SON	SON DNA BINDING PROTEIN	0	TRANSPORTER,TUMOR SUPPRESSOR
SOX18	SOX18	SRY-BOX 18	0	TRANSCRIPTION FACTOR COMPLEX,TRANSCRIPTION FACTOR
SP100	SP100	SP100 NUCLEAR ANTIGEN	0	NA
SP110	SP110	SP110 NUCLEAR BODY PROTEIN	0	TRANSCRIPTION FACTOR
SP140	SP140	SP140 NUCLEAR BODY PROTEIN	0	NA
SP140L	SP140L	SP140 NUCLEAR BODY PROTEIN LIKE	0	NA
SPATS1	SPATS1	SPERMATOGENESIS ASSOCIATED SERINE RICH 1	0	NA
SPEF2	SPEF2	SPERM FLAGELLAR 2	0	NA
SPRYD4	SPRYD4	SPRY DOMAIN CONTAINING 4	0	DRUGGABLE GENOME,B30_2 SPRY DOMAIN
SRP54	SRP54	SIGNAL RECOGNITION PARTICLE 54	0	NA
SRRM1	SRRM1	SERINE AND ARGININE REPETITIVE MATRIX 1	0	NA
SRSF1	SRSF1	SERINE AND ARGININE RICH SPLICING FACTOR 1	0	NA
SRSF3	SRSF3	SERINE AND ARGININE RICH SPLICING FACTOR 3	0	CLINICALLY ACTIONABLE
SSBP4	SSBP4	SINGLE STRANDED DNA BINDING PROTEIN 4	0	NA
ST8SIA4	ST8SIA4	ST8 ALPHA-N-ACETYL-NEURAMINIDE ALPHA-2,8-SIALYLTRANSFERASE 4	0	NA
STARD3	STARD3	STAR RELATED LIPID TRANSFER DOMAIN CONTAINING 3	0	NA
STAT2	STAT2	SIGNAL TRANSDUCER AND ACTIVATOR OF TRANSCRIPTION 2	0	KINASE,TRANSCRIPTION FACTOR
STIP1	STIP1	STRESS INDUCED PHOSPHOPROTEIN 1	0	NA
STK19	STK19	SERINE/THREONINE KINASE 19	0	KINASE,SERINE THREONINE KINASE,ENZYME
STK25	STK25	SERINE/THREONINE KINASE 25	0	KINASE,SERINE THREONINE KINASE,DRUGGABLE GENOME,ENZYME
STK38	STK38	SERINE/THREONINE KINASE 38	0	KINASE,SERINE THREONINE KINASE,DRUGGABLE GENOME,ENZYME
STMN3	STMN3	STATHMIN 3	0	NA
STPG1	STPG1	SPERM TAIL PG-RICH REPEAT CONTAINING 1	0	NA
STXBP4	STXBP4	SYNTAXIN BINDING PROTEIN 4	0	NA
SUCO	SUCO	SUN DOMAIN CONTAINING OSSIFICATION FACTOR	0	NA
SUOX	SUOX	SULFITE OXIDASE	0	DRUGGABLE GENOME,ENZYME
SYNJ1	SYNJ1	SYNAPTOJANIN 1	0	KINASE,DRUGGABLE GENOME,ENZYME
SYTL3	SYTL3	SYNAPTOTAGMIN LIKE 3	0	NA
TAF8	TAF8	TATA-BOX BINDING PROTEIN ASSOCIATED FACTOR 8	0	TRANSCRIPTION FACTOR
TAGAP	TAGAP	T-CELL ACTIVATION RHOGTPASE ACTIVATING PROTEIN	0	NA
TANGO6	TANGO6	TRANSPORT AND GOLGI ORGANIZATION 6 HOMOLOG	0	NA
TAP1	TAP1	TRANSPORTER 1, ATP BINDING CASSETTE SUBFAMILY B MEMBER	0	TRANSPORTER,ABC TRANSPORTER,DRUGGABLE GENOME
TAP2	TAP2	TRANSPORTER 2, ATP BINDING CASSETTE SUBFAMILY B MEMBER	0	TRANSPORTER,ABC TRANSPORTER,DRUGGABLE GENOME
TAPBPL	TAPBPL	TAP BINDING PROTEIN LIKE	0	TRANSPORTER,DRUGGABLE GENOME
TAPSAR1	PSMB8-AS1	PSMB8 ANTISENSE RNA 1 (HEAD TO HEAD)	0	NA
TAS1R3	TAS1R3	TASTE 1 RECEPTOR MEMBER 3	0	G PROTEIN COUPLED RECEPTOR,DRUGGABLE GENOME
TBC1D5	TBC1D5	TBC1 DOMAIN FAMILY MEMBER 5	0	NA
TCEA2	TCEA2	TRANSCRIPTION ELONGATION FACTOR A2	0	TRANSCRIPTION FACTOR
TCP10L2	TCP10L2	T-COMPLEX 10 LIKE 2	0	NA
TDRD10	TDRD10	TUDOR DOMAIN CONTAINING 10	0	NA
TDRKH	TDRKH	TUDOR AND KH DOMAIN CONTAINING	0	NA
TEF	TEF	TEF, PAR BZIP TRANSCRIPTION FACTOR	0	TRANSCRIPTION FACTOR
TEX40	CATSPERZ	CATSPER CHANNEL AUXILIARY SUBUNIT ZETA	0	NA
TFAM	TFAM	TRANSCRIPTION FACTOR A, MITOCHONDRIAL	0	TRANSCRIPTION FACTOR
TFDP2	TFDP2	TRANSCRIPTION FACTOR DP-2	0	TRANSCRIPTION FACTOR BINDING,TRANSCRIPTION FACTOR
TGFB1I1	TGFB1I1	TRANSFORMING GROWTH FACTOR BETA 1 INDUCED TRANSCRIPT 1	0	NUCLEAR HORMONE RECEPTOR,TRANSCRIPTION FACTOR
THADA	THADA	THADA, ARMADILLO REPEAT CONTAINING	0	CLINICALLY ACTIONABLE
THAP4	THAP4	THAP DOMAIN CONTAINING 4	0	NA
THAP7	THAP7	THAP DOMAIN CONTAINING 7	0	NA
THAP7-AS1	THAP7-AS1	THAP7 ANTISENSE RNA 1	0	NA
THEMIS	THEMIS	THYMOCYTE SELECTION ASSOCIATED	0	NA
TIMELESS	TIMELESS	TIMELESS CIRCADIAN CLOCK	0	DNA REPAIR
TM9SF2	TM9SF2	TRANSMEMBRANE 9 SUPERFAMILY MEMBER 2	0	TRANSPORTER,ION CHANNEL
TMBIM1	TMBIM1	TRANSMEMBRANE BAX INHIBITOR MOTIF CONTAINING 1	0	NA
TMC6	TMC6	TRANSMEMBRANE CHANNEL LIKE 6	0	TRANSPORTER,ION CHANNEL
TMC8	TMC8	TRANSMEMBRANE CHANNEL LIKE 8	0	TRANSPORTER,ION CHANNEL
TMED10	TMED10	TRANSMEMBRANE P24 TRAFFICKING PROTEIN 10	0	G PROTEIN COUPLED RECEPTOR,DRUGGABLE GENOME
TMED2	TMED2	TRANSMEMBRANE P24 TRAFFICKING PROTEIN 2	0	G PROTEIN COUPLED RECEPTOR
TMEM109	TMEM109	TRANSMEMBRANE PROTEIN 109	0	ION CHANNEL
TMEM110	STIMATE	STIM ACTIVATING ENHANCER	0	NA
TMEM132A	TMEM132A	TRANSMEMBRANE PROTEIN 132A	0	NA
TMEM175	TMEM175	TRANSMEMBRANE PROTEIN 175	0	TRANSPORTER,ION CHANNEL
TMEM180	MFSD13A	MAJOR FACILITATOR SUPERFAMILY DOMAIN CONTAINING 13A	0	NA
TMEM189	PEDS1	PLASMANYLETHANOLAMINE DESATURASE 1	0	ENZYME
TMEM189-UBE2V1	PEDS1-UBE2V1	PEDS1-UBE2V1 READTHROUGH	0	NA
TMEM196	TMEM196	TRANSMEMBRANE PROTEIN 196	0	NA
TMEM258	TMEM258	TRANSMEMBRANE PROTEIN 258	0	ENZYME
TMEM259	TMEM259	TRANSMEMBRANE PROTEIN 259	0	NA
TMEM30B	TMEM30B	TRANSMEMBRANE PROTEIN 30B	0	NA
TMEM50B	TMEM50B	TRANSMEMBRANE PROTEIN 50B	0	NA
TMEM63B	TMEM63B	TRANSMEMBRANE PROTEIN 63B	0	ION CHANNEL
TMEM75	LINC02912	LONG INTERGENIC NON-PROTEIN CODING RNA 2912	0	NA
TMPRSS6	TMPRSS6	TRANSMEMBRANE PROTEASE, SERINE 6	0	PROTEASE,DRUGGABLE GENOME,ENZYME
TNFAIP8	TNFAIP8	TNF ALPHA INDUCED PROTEIN 8	0	PROTEASE
TNFRSF14	TNFRSF14	TNF RECEPTOR SUPERFAMILY MEMBER 14	0	EXTERNAL SIDE OF PLASMA MEMBRANE,DRUGGABLE GENOME,CLINICALLY ACTIONABLE
TNFRSF6B	TNFRSF6B	TNF RECEPTOR SUPERFAMILY MEMBER 6B	0	DRUGGABLE GENOME
TNFSF18	TNFSF18	TNF SUPERFAMILY MEMBER 18	0	CELL SURFACE
TNIP1	TNIP1	TNFAIP3 INTERACTING PROTEIN 1	0	KINASE
TNP2	TNP2	TRANSITION PROTEIN 2	0	NA
TNRC6C	TNRC6C	TRINUCLEOTIDE REPEAT CONTAINING 6C	0	NA
TNRC6C-AS1	TNRC6C-AS1	TNRC6C ANTISENSE RNA 1	0	NA
TNXB	TNXB	TENASCIN XB	0	DRUGGABLE GENOME,FIBRINOGEN
TOB2	TOB2	TRANSDUCER OF ERBB2, 2	0	NA
TOM1	TOM1	TARGET OF MYB1 MEMBRANE TRAFFICKING PROTEIN	0	NA
TOMM6	TOMM6	TRANSLOCASE OF OUTER MITOCHONDRIAL MEMBRANE 6	0	NA
TPD52L2	TPD52L2	TUMOR PROTEIN D52 LIKE 2	0	NA
TRAF3	TRAF3	TNF RECEPTOR ASSOCIATED FACTOR 3	0	KINASE,CLINICALLY ACTIONABLE,ENZYME
TRAF3IP3	TRAF3IP3	TRAF3 INTERACTING PROTEIN 3	0	KINASE
TREH	TREH	TREHALASE	0	ENZYME
TRIM25	TRIM25	TRIPARTITE MOTIF CONTAINING 25	0	DRUGGABLE GENOME,B30_2 SPRY DOMAIN,TRANSCRIPTION FACTOR
TRIM44	TRIM44	TRIPARTITE MOTIF CONTAINING 44	0	NA
TRIM45	TRIM45	TRIPARTITE MOTIF CONTAINING 45	0	KINASE
TRIM46	TRIM46	TRIPARTITE MOTIF CONTAINING 46	0	DRUGGABLE GENOME,B30_2 SPRY DOMAIN
TRIM8	TRIM8	TRIPARTITE MOTIF CONTAINING 8	0	NA
TRIP10	TRIP10	THYROID HORMONE RECEPTOR INTERACTOR 10	0	NA
TRMT10C	TRMT10C	TRNA METHYLTRANSFERASE 10C, MITOCHONDRIAL RNASE P SUBUNIT	0	ENZYME
TRMT112	TRMT112	TRNA METHYLTRANSFERASE SUBUNIT 11-2	0	NA
TRMT2A	TRMT2A	TRNA METHYLTRANSFERASE 2 HOMOLOG A	0	NA
TRPT1	TRPT1	TRNA PHOSPHOTRANSFERASE 1	0	NA
TSC22D1	TSC22D1	TSC22 DOMAIN FAMILY MEMBER 1	0	TRANSCRIPTION FACTOR
TSEN54	TSEN54	TRNA SPLICING ENDONUCLEASE SUBUNIT 54	0	NA
TSPAN14	TSPAN14	TETRASPANIN 14	0	CELL SURFACE
TSPAN31	TSPAN31	TETRASPANIN 31	0	NA
TSTD1	TSTD1	THIOSULFATE SULFURTRANSFERASE LIKE DOMAIN CONTAINING 1	0	DRUGGABLE GENOME
TTC34	TTC34	TETRATRICOPEPTIDE REPEAT DOMAIN 34	0	NA
TTF2	TTF2	TRANSCRIPTION TERMINATION FACTOR 2	0	NA
TTLL10	TTLL10	TUBULIN TYROSINE LIGASE LIKE 10	0	NA
TTLL10-AS1	TTLL10-AS1	TTLL10 ANTISENSE RNA 1	0	NA
TTLL5	TTLL5	TUBULIN TYROSINE LIGASE LIKE 5	0	NA
TUBE1	TUBE1	TUBULIN EPSILON 1	0	DRUGGABLE GENOME
UBAC2	UBAC2	UBA DOMAIN CONTAINING 2	0	NA
UBAC2-AS1	UBAC2-AS1	UBAC2 ANTISENSE RNA 1	0	NA
UBE2D3	UBE2D3	UBIQUITIN CONJUGATING ENZYME E2 D3	0	DNA REPAIR,ENZYME
UBE2J2	UBE2J2	UBIQUITIN CONJUGATING ENZYME E2 J2	0	ENZYME
UBE2L3	UBE2L3	UBIQUITIN CONJUGATING ENZYME E2 L3	0	ENZYME
UBE2Q1	UBE2Q1	UBIQUITIN CONJUGATING ENZYME E2 Q1	0	ENZYME
UBE2Q1-AS1	UBE2Q1-AS1	UBE2Q1 ANTISENSE RNA 1	0	NA
UBE2V1	UBE2V1	UBIQUITIN CONJUGATING ENZYME E2 V1	0	ENZYME
UBR2	UBR2	UBIQUITIN PROTEIN LIGASE E3 COMPONENT N-RECOGNIN 2	0	NA
UCKL1	UCKL1	URIDINE-CYTIDINE KINASE 1 LIKE 1	0	KINASE
UNC45A	UNC45A	UNC-45 MYOSIN CHAPERONE A	0	NA
UPF1	UPF1	UPF1, RNA HELICASE AND ATPASE	0	DNA REPAIR,KINASE
UPK2	UPK2	UROPLAKIN 2	0	NA
UPP1	UPP1	URIDINE PHOSPHORYLASE 1	0	DRUGGABLE GENOME,ENZYME
UQCC2	UQCC2	UBIQUINOL-CYTOCHROME C REDUCTASE COMPLEX ASSEMBLY FACTOR 2	0	NA
USP37	USP37	UBIQUITIN SPECIFIC PEPTIDASE 37	0	PROTEASE
USP49	USP49	UBIQUITIN SPECIFIC PEPTIDASE 49	0	PROTEASE
VAMP1	VAMP1	VESICLE ASSOCIATED MEMBRANE PROTEIN 1	0	DRUGGABLE GENOME
VANGL2	VANGL2	VANGL PLANAR CELL POLARITY PROTEIN 2	0	NA
VARS	VARS1	VALYL-TRNA SYNTHETASE 1	0	DRUGGABLE GENOME
VAULT	VTRNA2-1	VAULT RNA 2-1	0	NA
VAX2	VAX2	VENTRAL ANTERIOR HOMEOBOX 2	0	TRANSCRIPTION FACTOR
VCL	VCL	VINCULIN	0	DRUGGABLE GENOME
VPS37B	VPS37B	VPS37B, ESCRT-I SUBUNIT	0	NA
VPS37C	VPS37C	VPS37C, ESCRT-I SUBUNIT	0	NA
VPS4A	VPS4A	VACUOLAR PROTEIN SORTING 4 HOMOLOG A	0	ENZYME
VRK2	VRK2	VACCINIA RELATED KINASE 2	0	KINASE,SERINE THREONINE KINASE,DRUGGABLE GENOME,ENZYME
WBP1L	WBP1L	WW DOMAIN BINDING PROTEIN 1 LIKE	0	NA
WDR18	WDR18	WD REPEAT DOMAIN 18	0	NA
WFDC3	WFDC3	WAP FOUR-DISULFIDE CORE DOMAIN 3	0	PROTEASE INHIBITOR
WISP1	CCN4	CELLULAR COMMUNICATION NETWORK FACTOR 4	0	KINASE,DRUGGABLE GENOME
WISP3	CCN6	CELLULAR COMMUNICATION NETWORK FACTOR 6	0	GROWTH FACTOR,DRUGGABLE GENOME,CLINICALLY ACTIONABLE
WRNIP1	WRNIP1	WERNER HELICASE INTERACTING PROTEIN 1	0	NA
YDJC	YDJC	YDJC CHITOOLIGOSACCHARIDE DEACETYLASE HOMOLOG	0	NA
YPEL5	YPEL5	YIPPEE LIKE 5	0	CLINICALLY ACTIONABLE,TRANSCRIPTION FACTOR
ZBTB10	ZBTB10	ZINC FINGER AND BTB DOMAIN CONTAINING 10	0	NA
ZBTB37	ZBTB37	ZINC FINGER AND BTB DOMAIN CONTAINING 37	0	NA
ZBTB38	ZBTB38	ZINC FINGER AND BTB DOMAIN CONTAINING 38	0	NA
ZBTB46	ZBTB46	ZINC FINGER AND BTB DOMAIN CONTAINING 46	0	NA
ZBTB7B	ZBTB7B	ZINC FINGER AND BTB DOMAIN CONTAINING 7B	0	TRANSCRIPTION FACTOR
ZC3H10	ZC3H10	ZINC FINGER CCCH-TYPE CONTAINING 10	0	NA
ZC3H12D	ZC3H12D	ZINC FINGER CCCH-TYPE CONTAINING 12D	0	NA
ZCCHC24	ZCCHC24	ZINC FINGER CCHC-TYPE CONTAINING 24	0	NA
ZCWPW2	ZCWPW2	ZINC FINGER CW-TYPE AND PWWP DOMAIN CONTAINING 2	0	NA
ZEB1-AS1	ZEB1-AS1	ZEB1 ANTISENSE RNA 1	0	NA
ZFP36L1	ZFP36L1	ZFP36 RING FINGER PROTEIN LIKE 1	0	KINASE,TRANSCRIPTION FACTOR
ZFP36L2	ZFP36L2	ZFP36 RING FINGER PROTEIN LIKE 2	0	TRANSCRIPTION FACTOR
ZFYVE26	ZFYVE26	ZINC FINGER FYVE-TYPE CONTAINING 26	0	NA
ZGLP1	ZGLP1	ZINC FINGER, GATA-LIKE PROTEIN 1	0	TRANSCRIPTION FACTOR
ZGPAT	ZGPAT	ZINC FINGER CCCH-TYPE AND G-PATCH DOMAIN CONTAINING	0	NA
ZMIZ1	ZMIZ1	ZINC FINGER MIZ-TYPE CONTAINING 1	0	KINASE,TRANSCRIPTION FACTOR
ZNF114	ZNF114	ZINC FINGER PROTEIN 114	0	NA
ZNF142	ZNF142	ZINC FINGER PROTEIN 142	0	NA
ZNF248	ZNF248	ZINC FINGER PROTEIN 248	0	NA
ZNF25	ZNF25	ZINC FINGER PROTEIN 25	0	NA
ZNF267	ZNF267	ZINC FINGER PROTEIN 267	0	NA
ZNF335	ZNF335	ZINC FINGER PROTEIN 335	0	NA
ZNF365	ZNF365	ZINC FINGER PROTEIN 365	0	NA
ZNF385C	ZNF385C	ZINC FINGER PROTEIN 385C	0	NA
ZNF395	ZNF395	ZINC FINGER PROTEIN 395	0	NA
ZNF512B	ZNF512B	ZINC FINGER PROTEIN 512B	0	NA
ZNF513	ZNF513	ZINC FINGER PROTEIN 513	0	NA
ZNF646	ZNF646	ZINC FINGER PROTEIN 646	0	NA
ZNF668	ZNF668	ZINC FINGER PROTEIN 668	0	NA
ZNF774	ZNF774	ZINC FINGER PROTEIN 774	0	NA
ZNF843	ZNF843	ZINC FINGER PROTEIN 843	0	NA
ZPBP	ZPBP	ZONA PELLUCIDA BINDING PROTEIN	0	NA
ZPBP2	ZPBP2	ZONA PELLUCIDA BINDING PROTEIN 2	0	NA
ZSWIM8	ZSWIM8	ZINC FINGER SWIM-TYPE CONTAINING 8	0	NA

## Sheet: long
SearchTerm	Gene	Drug	InteractionType	Source	PMIDs
ABHD6	ABHD6	ORLISTAT		DTC	26344596
ACYP2	ACYP2	CISPLATIN		PharmGKB	2692827031666710
ADO	ADO	HYDROCHLOROTHIAZIDE		PharmGKB	31327267
AL121594.1, KIAA0391	PRORP	ZILEUTON		PharmGKB	25963335
APH1A	APH1A	TARENFLURBIL	modulator	ChemblInteractions
APH1A	APH1A	BEGACESTAT	inhibitor	ChemblInteractions
APH1A	APH1A	SEMAGACESTAT	inhibitor	DTC,ChemblInteractions	19443228
APH1A	APH1A	AVAGACESTAT	inhibitor	TdgClinicalTrial,ChemblInteractions
APH1A	APH1A	CHEMBL392068		DTC	2318150219443220
APH1A	APH1A	MK-0752		ClearityFoundationClinicalTrial
APH1A	APH1A	CHEMBL247471		TdgClinicalTrial
APH1A	APH1A	IC261		DTC	20350806
APH1A	APH1A	METHYLINOSITOL		TdgClinicalTrial
APH1A	APH1A	GSI-136		TdgClinicalTrial
ARHGAP12	ARHGAP12	METHYLPHENIDATE		PharmGKB	29382897
ARID5B	ARID5B	HALOPERIDOL		PharmGKB	27023437
ARID5B	ARID5B	METHOTREXATE		PharmGKB	24712521
ATG16L1	ATG16L1	ADALIMUMAB		PharmGKB	25712183
ATG4B	ATG4B	DOXYCYCLINE HYCLATE		DTC
ATG4B	ATG4B	ALEXIDINE HYDROCHLORIDE		DTC
ATG4B	ATG4B	LINOLENIC ACID		DTC
ATG4B	ATG4B	TOLFENAMIC ACID		DTC
ATG4B	ATG4B	9,10-PHENANTHRENEQUINONE		DTC
ATG4B	ATG4B	FENTICLOR		DTC
ATG4B	ATG4B	CHEMBL429095		DTC
ATG4B	ATG4B	CHEMBL601757		DTC
ATG4B	ATG4B	CHEMBL605084		DTC
ATG4B	ATG4B	CHEMBL528181		DTC
ATG4B	ATG4B	CETYLPYRIDINIUM BROMIDE		DTC
ATG4B	ATG4B	CHEMBL599924		DTC
ATG4B	ATG4B	BIFONAZOLE		DTC
ATP1B3	ATP1B3	ACETYLDIGITOXIN	inhibitor	ChemblInteractions
ATP1B3	ATP1B3	DIGITOXIN	inhibitor	ChemblInteractions
ATP1B3	ATP1B3	DESLANOSIDE	inhibitor	ChemblInteractions
ATP1B3	ATP1B3	DIGOXIN	inhibitor	ChemblInteractions
ATP5D	ATP5F1D	DESFLURANE	other/unknown	TdgClinicalTrial,TEND	1.71393e+22
ATP5D	ATP5F1D	METHOXYFLURANE		TdgClinicalTrial,TEND	1713928417016420
ATP5D	ATP5F1D	ENFLURANE		TdgClinicalTrial,TEND	8214757
ATP5D	ATP5F1D	SEVOFLURANE		TdgClinicalTrial,TEND	1713928417016420
ATP5D	ATP5F1D	HALOTHANE		TdgClinicalTrial,TEND	1713928417016420
ATXN2	ATXN2	PROCHLORPERAZINE		DTC
ATXN2	ATXN2	OXYPHENBUTAZONE		DTC
ATXN2	ATXN2	CHEMBL429095		DTC
ATXN2	ATXN2	ERBSTATIN		DTC
ATXN2	ATXN2	CHEMBL493863		DTC
ATXN2	ATXN2	CEPHARANTHINE		DTC
ATXN2	ATXN2	CHLORPROMAZINE HYDROCHLORIDE		DTC
ATXN2	ATXN2	CHEMBL578944		DTC
ATXN2	ATXN2	CHEMBL1287980		DTC
ATXN2	ATXN2	CHEMBL600747		DTC
ATXN2	ATXN2	TRIFLUOPERAZINE HYDROCHLORIDE		DTC
ATXN2	ATXN2	CHEMBL601364		DTC
ATXN2	ATXN2	ALOXISTATIN		DTC
ATXN2	ATXN2	PAROXETINE		DTC
ATXN2	ATXN2	CHEMBL482050		DTC
ATXN2	ATXN2	CHEMBL580340		DTC
ATXN2	ATXN2	CHEMBL1549738		DTC
ATXN2	ATXN2	CHEMBL309760		DTC
ATXN2	ATXN2	CHEMBL116548		DTC
ATXN2	ATXN2	CHEMBL585591		DTC
ATXN2	ATXN2	CHEMBL585502		DTC
ATXN2	ATXN2	SERTRALINE		DTC
ATXN2	ATXN2	FANCHININ		DTC
ATXN2	ATXN2	CHEMBL17201		DTC
ATXN2	ATXN2	SAQUINAVIR		DTC
ATXN2	ATXN2	THIOTHIXENE		DTC
ATXN2	ATXN2	NICARDIPINE		DTC
ATXN2	ATXN2	RALOXIFENE		DTC
ATXN2	ATXN2	TOLONIUM CHLORIDE		DTC
ATXN2	ATXN2	CHEMBL600353		DTC
ATXN2	ATXN2	GR-127935		DTC
ATXN2	ATXN2	APOMORPHINE HYDROCHLORIDE HEMIHYDRATE		DTC
ATXN2	ATXN2	PROMETHAZINE		DTC
ATXN2	ATXN2	PIPLARTINE		DTC
ATXN2	ATXN2	CHEMBL1503190		DTC
ATXN2	ATXN2	THIRAM		DTC
ATXN2	ATXN2	CHEMBL591126		DTC
ATXN2	ATXN2	PYROGALLOL RED		DTC
ATXN2	ATXN2	CHEMBL1465049		DTC
ATXN2	ATXN2	CHEMBL579045		DTC
ATXN2	ATXN2	CHEMBL1481509		DTC
ATXN2	ATXN2	CHEMBL1334191		DTC
ATXN2	ATXN2	CHEMBL546493		DTC
ATXN2	ATXN2	IDARUBICIN HYDROCHLORIDE		DTC
ATXN2	ATXN2	NICLOSAMIDE		DTC
ATXN2	ATXN2	(S)-ROSCOVITINE		DTC
ATXN2	ATXN2	CLEMASTINE FUMARATE		DTC
ATXN2	ATXN2	PYRITHIONE		DTC
ATXN2	ATXN2	CHEMBL1889303		DTC
ATXN2	ATXN2	CHEMBL576409		DTC
ATXN2	ATXN2	KAMEBANIN		DTC
ATXN2	ATXN2	CHELERYTHRINE		DTC
ATXN2	ATXN2	AFIMOXIFENE		DTC
ATXN2	ATXN2	CHEMBL581152		DTC
ATXN2	ATXN2	CHEMBL1415851		DTC
ATXN2	ATXN2	CHEMBL579318		DTC
ATXN2	ATXN2	CHEMBL1256660		DTC
ATXN2	ATXN2	VANOXERINE		DTC
ATXN2	ATXN2	CHEMBL1362503		DTC
ATXN2	ATXN2	CHEMBL576208		DTC
ATXN2	ATXN2	KEPONE		DTC
ATXN2	ATXN2	NELFINAVIR MESYLATE		DTC
ATXN2	ATXN2	BAY-11-7085		DTC
ATXN2	ATXN2	CHEMBL288174		DTC
ATXN2	ATXN2	LOBARIC ACID		DTC
ATXN2	ATXN2	CHEMBL596633		DTC
ATXN2	ATXN2	CHEMBL536375		DTC
ATXN2	ATXN2	VINBLASTINE SULFATE		DTC
ATXN2	ATXN2	ISOVELLERAL		DTC
ATXN2	ATXN2	PIMOZIDE		DTC
ATXN2	ATXN2	FANGCHINOLINE		DTC
ATXN2	ATXN2	EMETINE		DTC
ATXN2	ATXN2	A-443654		DTC
ATXN2	ATXN2	PROPYLPYRAZOLETRIOL		DTC
ATXN2	ATXN2	TETRABROMOBENZOTRIAZOLE		DTC
ATXN2	ATXN2	CHEMBL1519374		DTC
ATXN2	ATXN2	THONZONIUM BROMIDE		DTC
ATXN2	ATXN2	THIORIDAZINE		DTC
ATXN2	ATXN2	PROTOAPIGENONE		DTC
ATXN2	ATXN2	IDARUBICIN		DTC
ATXN2	ATXN2	NORDIHYDROGUAIARETIC ACID		DTC
ATXN2	ATXN2	CHEMBL81782		DTC
ATXN2	ATXN2	HONOKIOL		DTC
ATXN2	ATXN2	(R,S)-INDATRALINE		DTC
ATXN2	ATXN2	CHEMBL458094		DTC
ATXN2	ATXN2	DOCEBENONE		DTC
ATXN2	ATXN2	CHEMBL531268		DTC
ATXN2	ATXN2	SERTRALINE HYDROCHLORIDE		DTC
ATXN2	ATXN2	CHEMBL604321		DTC
ATXN2	ATXN2	CHEMBL533602		DTC
ATXN2	ATXN2	CHLORHEXIDINE		DTC
ATXN2	ATXN2	FLUOXETINE HYDROCHLORIDE		DTC
ATXN2	ATXN2	CHEMBL602946		DTC
ATXN2	ATXN2	THIMEROSAL		DTC
ATXN2	ATXN2	CHEMBL582699		DTC
ATXN2	ATXN2	AMSACRINE		DTC
ATXN2	ATXN2	ALEXIDINE HYDROCHLORIDE		DTC
ATXN2	ATXN2	CYCLOSPORINE		DTC
ATXN2	ATXN2	PERHEXILINE MALEATE		DTC
ATXN2	ATXN2	CHEMBL1392894		DTC
ATXN2	ATXN2	LAPACHONE		DTC
ATXN2	ATXN2	CALCIMYCIN		DTC
ATXN2	ATXN2	CHEMBL1287983		DTC
ATXN2	ATXN2	CHEMBL589715		DTC
ATXN2	ATXN2	CHEMBL461579		DTC
ATXN2	ATXN2	FENDILINE HYDROCHLORIDE		DTC
ATXN2	ATXN2	SERTACONAZOLE NITRATE		DTC
ATXN2	ATXN2	BENZETHONIUM CHLORIDE		DTC
ATXN2	ATXN2	PERPHENAZINE		DTC
ATXN2	ATXN2	CHEMBL1546223		DTC
ATXN2	ATXN2	SORAFENIB TOSYLATE		DTC
ATXN2	ATXN2	CHEMBL592316		DTC
ATXN2	ATXN2	CHEMBL590686		DTC
ATXN2	ATXN2	FLUOXETINE		DTC
ATXN2	ATXN2	CHEMBL600734		DTC
ATXN2	ATXN2	CHEMBL515505		DTC
ATXN2	ATXN2	CHEMBL601757		DTC
ATXN2	ATXN2	CHEMBL585656		DTC
ATXN2	ATXN2	CHEMBL587849		DTC
ATXN2	ATXN2	ENCLOMIPHENE		DTC
ATXN2	ATXN2	CHEMBL530049		DTC
ATXN2	ATXN2	CHEMBL576362		DTC
ATXN2	ATXN2	CHEMBL299853		DTC
ATXN2	ATXN2	METITEPINE		DTC
ATXN2	ATXN2	CHEMBL223575		DTC
ATXN2	ATXN2	METHIOTHEPIN MESYLATE		DTC
ATXN2	ATXN2	PROADIFEN HYDROCHLORIDE		DTC
ATXN2	ATXN2	EPIRUBICIN HYDROCHLORIDE		DTC
ATXN2	ATXN2	CHEMBL1169388		DTC
ATXN2	ATXN2	ENNIATIN B		DTC
ATXN2	ATXN2	THAPSIGARGIN		DTC
ATXN2	ATXN2	CHEMBL607253		DTC
ATXN2	ATXN2	MITOXANTRONE		DTC
ATXN2	ATXN2	CHEMBL599098		DTC
ATXN2	ATXN2	GERONTOXANTHONE H		DTC
ATXN2	ATXN2	MAPROTILINE		DTC
ATXN2	ATXN2	CHEMBL586937		DTC
ATXN2	ATXN2	MITOXANTRONE HYDROCHLORIDE		DTC
ATXN2	ATXN2	GEDUNIN		DTC
ATXN2	ATXN2	CHEMBL578915		DTC
ATXN2	ATXN2	CYCLOVALONE		DTC
ATXN2	ATXN2	CHEMBL1606		DTC
ATXN2	ATXN2	BROMOENOL LACTONE		DTC
ATXN2	ATXN2	CHEMBL586024		DTC
ATXN2	ATXN2	CLOFOCTOL		DTC
ATXN2	ATXN2	TUBERCIDIN		DTC
ATXN2	ATXN2	OSAJIN		DTC
ATXN2	ATXN2	CHEMBL546597		DTC
ATXN2	ATXN2	CHEMBL534535		DTC
ATXN2	ATXN2	CHEMBL603952		DTC
ATXN2	ATXN2	GOSSYPOL		DTC
ATXN2	ATXN2	CHEMBL86464		DTC
ATXN2	ATXN2	CHEMBL291143		DTC
ATXN2	ATXN2	CARMINIC ACID		DTC
ATXN2	ATXN2	ENCLOMIPHENE CITRATE		DTC
ATXN2	ATXN2	CHEMBL599924		DTC
ATXN2	ATXN2	OLEOYL DOPAMINE		DTC
ATXN2	ATXN2	PHENANTHROLINE		DTC
ATXN2	ATXN2	N-DESMETHYLCLOZAPINE		DTC
ATXN2	ATXN2	PYRONIN Y		DTC
ATXN2	ATXN2	CHEMBL609606		DTC
ATXN2	ATXN2	CHEMBL589694		DTC
ATXN2	ATXN2	CHEMBL600908		DTC
ATXN2	ATXN2	CAMPTOTHECIN		DTC
ATXN2	ATXN2	CHEMBL2094789		DTC
ATXN2	ATXN2	CUCURBITACIN B		DTC
ATXN2	ATXN2	CHEMBL578512		DTC
ATXN2	ATXN2	DOXORUBICIN HYDROCHLORIDE		DTC
ATXN2	ATXN2	9,10-PHENANTHRENEQUINONE		DTC
ATXN2	ATXN2	CHEMBL580819		DTC
ATXN2	ATXN2	PARAROSANILINE		DTC
ATXN2	ATXN2	CHEMBL591834		DTC
ATXN2	ATXN2	CHEMBL578257		DTC
ATXN2	ATXN2	FENRETINIDE		DTC
ATXN2	ATXN2	CLOTRIMAZOLE		DTC
ATXN2	ATXN2	CHEMBL591404		DTC
ATXN2	ATXN2	SANGUINARIUM		DTC
ATXN2	ATXN2	CP-55940		DTC
ATXN2	ATXN2	CUDRAFLAVONE B		DTC
ATXN2	ATXN2	CHEMBL528694		DTC
ATXN2	ATXN2	CHEMBL515617		DTC
ATXN2	ATXN2	XANTHOANGELOL F		DTC
ATXN2	ATXN2	ECONAZOLE NITRATE		DTC
ATXN2	ATXN2	CHEMBL2095095		DTC
ATXN2	ATXN2	CLOROTEPINE		DTC
ATXN2	ATXN2	INDIRUBIN-3-MONOXIME		DTC
ATXN2	ATXN2	XANTHOANGELOL		DTC
ATXN2	ATXN2	CHEMBL1546228		DTC
ATXN2	ATXN2	TPCK		DTC
ATXN2	ATXN2	CHEMBL1576310		DTC
ATXN2	ATXN2	CHEMBL596380		DTC
ATXN2	ATXN2	FLAVOKAWAIN B		DTC
ATXN2	ATXN2	CANTHARIDIC_ACID		DTC
ATXN2	ATXN2	CHEMBL1255834		DTC
ATXN2	ATXN2	MENADIONE		DTC
ATXN2	ATXN2	TEGASEROD MALEATE		DTC
ATXN2	ATXN2	ENPIROLINE		DTC
ATXN2	ATXN2	QUINESTROL		DTC
ATXN2	ATXN2	CHEMBL1343568		DTC
ATXN2	ATXN2	CHEMBL590168		DTC
ATXN2	ATXN2	CHEMBL505670		DTC
ATXN2	ATXN2	CHEMBL582473		DTC
ATXN2	ATXN2	MEFLOQUINE HYDROCHLORIDE		DTC
ATXN2	ATXN2	PD-173074		DTC
ATXN2	ATXN2	HELENALIN		DTC
ATXN2	ATXN2	TAMOXIFEN		DTC
ATXN2	ATXN2	CHEMBL607309		DTC
ATXN2	ATXN2	CALMIDAZOLIUM CHLORIDE		DTC
ATXN2	ATXN2	CHEMBL1701915		DTC
ATXN2	ATXN2	CHEMBL1902074		DTC
ATXN2	ATXN2	HYCANTHONE		DTC
ATXN2	ATXN2	CHEMBL1526167		DTC
ATXN2	ATXN2	MIBEFRADIL		DTC
ATXN2	ATXN2	SAQUINAVIR MESYLATE		DTC
ATXN2	ATXN2	AURIN		DTC
ATXN2	ATXN2	CHEMBL73711		DTC
ATXN2	ATXN2	CHEMBL549208		DTC
ATXN2	ATXN2	THIORIDAZINE HYDROCHLORIDE		DTC
ATXN2	ATXN2	SPHAEROPSIDIN A		DTC
ATXN2	ATXN2	CHEMBL528712		DTC
ATXN2	ATXN2	LASALOCID A SODIUM		DTC
ATXN2	ATXN2	CHEMBL1567571		DTC
ATXN2	ATXN2	AROMOLINE		DTC
ATXN2	ATXN2	CHEMBL589245		DTC
ATXN2	ATXN2	TRIFLUOPERAZINE		DTC
ATXN2	ATXN2	METHIXENE HYDROCHLORIDE		DTC
ATXN2	ATXN2	CHEMBL1306556		DTC
ATXN2	ATXN2	SCLEROTIORIN		DTC
ATXN2	ATXN2	R-N-PROPYLNORAPOMORPHINE		DTC
ATXN2	ATXN2	CHEMBL532160		DTC
ATXN2	ATXN2	NANAOMYCIN		DTC
ATXN2	ATXN2	NORTRIPTYLINE		DTC
ATXN2	ATXN2	CHEMBL461193		DTC
ATXN2	ATXN2	CHEMBL588038		DTC
ATXN2	ATXN2	PAROXETINE HYDROCHLORIDE		DTC
ATXN2	ATXN2	TYRPHOSTIN A9		DTC
ATXN2	ATXN2	CHEMBL569864		DTC
ATXN2	ATXN2	CHEMBL403183		DTC
ATXN2	ATXN2	GEOPYXIN A		DTC
ATXN2	ATXN2	N-AMINOHEXYL-5-CHLORO-1-NAPTHALENESULFONAMIDE HYDROCHLORIDE		DTC
ATXN2	ATXN2	SB-242084		DTC
ATXN2	ATXN2	DEPHOSTATIN		DTC
ATXN2	ATXN2	ANGUSTIBALIN		DTC
ATXN2	ATXN2	CHEMBL586135		DTC
ATXN2	ATXN2	NIFEDIPINE		DTC
ATXN2	ATXN2	FLUPENTIXOL		DTC
ATXN2	ATXN2	CHEMBL578502		DTC
ATXN2	ATXN2	T091317		DTC
ATXN2	ATXN2	CHEMBL523200		DTC
ATXN2	ATXN2	SU-9516		DTC
ATXN2	ATXN2	TANSHINONE I		DTC
ATXN2	ATXN2	STREPTONIGRIN		DTC
BAD	BAD	RUBOXISTAURIN		DTC	18077363
BAD	BAD	ISOSORBIDE		TdgClinicalTrial
BAG6	BAG6	CARBAMAZEPINE		PharmGKB	16538176
BAK1	BAK1	KERACYANIN		DTC	17360708
BAX	BAX	BORTEZOMIB	inhibitor	TALC
BAX	BAX	ESTRAMUSTINE		NCI	15869997
BAX	BAX	OXALIPLATIN		NCI	1554597514985450
BAX	BAX	BCG VACCINE		NCI	9393826
BAX	BAX	QUERCETIN		NCI	15741050
BAX	BAX	MEDROXYPROGESTERONE ACETATE		NCI	15885761
BAX	BAX	PHENYLEPHRINE		NCI	10220693
BAX	BAX	OXYTOCIN		NCI	15590985
BAX	BAX	DOCETAXEL		NCI	15641988
BAX	BAX	NICOTINE		NCI	15225679
BAX	BAX	ROFECOXIB		NCI	14627349
BAX	BAX	LEUCOVORIN		NCI	11237386
BAX	BAX	PHENOBARBITAL		NCI	9230198
BAX	BAX	CIPROFLOXACIN		NCI	1074171312632060
BAX	BAX	ANDROSTENEDIONE		NCI	15590985
BAX	BAX	PREDNISOLONE		NCI	12730678
BAX	BAX	O-CHLOROACETYLCARBAMOYLFUMAGILLOL		NCI	10481942
BAX	BAX	SIROLIMUS		NCI	15782132
BAX	BAX	DOXORUBICIN		NCI	12040435
BAX	BAX	FLUDARABINE		NCI	12040435
BAX	BAX	MITOXANTRONE		NCI	1476752511839660
BAX	BAX	CARVEDILOL		NCI	1675952012973920
BAX	BAX	VERAPAMIL		NCI	9354939
BAX	BAX	LAPACHONE		NCI	15753997
BAX	BAX	METHOTREXATE		NCI	11237386
BAX	BAX	SULFORAPHANE		NCI	15753404
BAX	BAX	PROCARBAZINE		NCI	11839668
BAX	BAX	CISPLATIN		NCI	15790433
BAX	BAX	SODIUM CHLORIDE		NCI	15641688
BAX	BAX	MELATONIN		NCI	15205854
BAX	BAX	ERYTHROMYCIN		NCI	17007374
BAX	BAX	DACARBAZINE		NCI	14512787
BAX	BAX	LEVODOPA		NCI	15672541
BAX	BAX	ETOPOSIDE		NCI	15454884
BAX	BAX	KERACYANIN		DTC	17360708
BAX	BAX	CAMPTOTHECIN		NCI	9398050
BAX	BAX	BICALUTAMIDE		NCI	11845989
BAX	BAX	CILMOSTIM		NCI	10770207
BAX	BAX	PRASTERONE		NCI	9177459
BAX	BAX	VINORELBINE		NCI	11720482
BAX	BAX	ANDROSTANOLONE		NCI	15517879
BAX	BAX	CYCLOPHOSPHAMIDE		NCI	14767525
BAX	BAX	NALTREXONE		NCI	16716514
BAX	BAX	ERBITUX		NCI	12850474
BAX	BAX	FLUOROURACIL		NCI	15641988
BAX	BAX	RETINOL		NCI	17202653
BAX	BAX	ATENOLOL		NCI	16995309
BAX	BAX	PRAVASTATIN		NCI	16540096
BCL2L11	BCL2L11	IMATINIB		CIViC,PharmGKB	2422382422426420
BCL2L11	BCL2L11	KERACYANIN		DTC	17360708
BCL6	BCL6	ONALESPIB		CGI
BCL6	BCL6	FENRETINIDE		NCI	11027625
BLM	BLM	L-NOREPINEPHRINE		DTC
BLM	BLM	PYROGALLOL RED		DTC
BLM	BLM	METHOCTRAMINE HYDROCHLORIDE		DTC
BLM	BLM	FENOLDOPAM BROMIDE		DTC
BLM	BLM	9,10-PHENANTHRENEQUINONE		DTC
BLM	BLM	TANSHINONE IIA SULFONATE		DTC
BLM	BLM	CHEMBL175266		DTC
BLM	BLM	ERYTHROSINE		DTC
BLM	BLM	STREPTONIGRIN		DTC
BLM	BLM	DIHYDROGAMBOGIC ACID		DTC
BLM	BLM	QUERCETIN		DTC
BLM	BLM	ELLAGIC ACID		DTC
BLM	BLM	ROSE BENGAL		DTC
BLM	BLM	CHEMBL72365		DTC
BLM	BLM	SOFALCONE		DTC
BLM	BLM	MITOXANTRONE		DTC
BLM	BLM	HYDROXYUREA		NCI	18504617
BLM	BLM	JUGLONE		DTC
BLM	BLM	CHEMBL458328		DTC
BLM	BLM	CHEMBL601757		DTC
BLM	BLM	CHEMBL580421		DTC
BLM	BLM	ROSMARINIC ACID		DTC
BLM	BLM	CHEMBL1397270		DTC
BLM	BLM	MENADIONE		DTC
BLM	BLM	CHEMBL234338		DTC
BLM	BLM	METHYLDOPA		DTC
BLM	BLM	SALIRASIB		DTC
BLM	BLM	RHEIN		DTC
BLM	BLM	CHEMBL463783		DTC
BLM	BLM	PURPUROGALLIN		DTC
BLM	BLM	CHEMBL1307453		DTC
BLM	BLM	BAICALEIN		DTC
BLM	BLM	TRIMETREXATE		DTC
BLM	BLM	CHEMBL56393		DTC
BLM	BLM	QUERCETIN DIHYDRATE		DTC
BLM	BLM	CHEMBL1256813		DTC
BLM	BLM	DAUNORUBICIN		DTC
BLM	BLM	CHEMBL1364172		DTC
BLM	BLM	AURINTRICARBOXYLIC ACID		DTC
BLM	BLM	ASTERRIC ACID		DTC
BLM	BLM	METHYLTHIONINIUM CHLORIDE		DTC
BLM	BLM	TETRAIDOFLUORESCEIN		DTC
BLM	BLM	DEPHOSTATIN		DTC
BLM	BLM	PHANQUONE		DTC
BLM	BLM	WEDELOLACTONE		DTC
BLM	BLM	FLUPIRTINE MALEATE		DTC
BLM	BLM	GW7647		DTC
BLM	BLM	HYPERICIN		DTC
BLM	BLM	CHEMBL211670		DTC
BLM	BLM	NOREPINEPHRINE		DTC
BLM	BLM	ESTRAMUSTINE		DTC
BLM	BLM	LOMOFUNGIN		DTC
BLM	BLM	CHEMBL429095		DTC
BLM	BLM	MYRICETIN		DTC
BLM	BLM	HARMALOL		DTC
BLM	BLM	GOSSYPOL		DTC
BLM	BLM	IRIGINOL HEXAACEATATE		DTC
BLM	BLM	IRIGENOL		DTC
BLM	BLM	BEXAROTENE		DTC
BLM	BLM	MITOXANTRONE HYDROCHLORIDE		DTC
BLM	BLM	LEVODOPA		DTC
BLM	BLM	LIPOIC ACID, ALPHA		DTC
BLM	BLM	FENOLDOPAM MESYLATE		DTC
BLM	BLM	CHEMBL106525		DTC
BLM	BLM	CHEMBL585591		DTC
BLM	BLM	CARUBICIN		DTC
BLM	BLM	QUINALDINE BLUE		DTC
BLM	BLM	DAUNORUBICIN HYDROCHLORIDE		DTC
BLM	BLM	CHEMBL530280		DTC
BLM	BLM	CONGO RED		DTC
BLM	BLM	LAPACHONE		DTC
BLM	BLM	CHEMBL587856		DTC
BLM	BLM	LIOTHYRONINE SODIUM		DTC
BLM	BLM	CHEMBL515252		DTC
BLM	BLM	CHEMBL592124		DTC
BLM	BLM	CHEMBL67535		DTC
BLM	BLM	CHEMBL1504679		DTC
BLM	BLM	FLUORESCEIN		DTC
BLM	BLM	5,7-DIHYDROXYISOFLAVONE		DTC
BLM	BLM	CAULIBUGULONE B		DTC
BLM	BLM	METHYLENE BLUE		DTC
BLM	BLM	CAULIBUGULONE C		DTC
BLM	BLM	TOLONIUM CHLORIDE		DTC
BLM	BLM	ALAZANINE		DTC
BLM	BLM	LUTEOLIN		DTC
BLM	BLM	ACRIFLAVINE		DTC
BLM	BLM	CHEMBL1451216		DTC
BLM	BLM	HELIOMYCIN		DTC
BLM	BLM	3-O-METHYLQUERCETIN		DTC
BLM	BLM	CHEMBL68534		DTC
BLM	BLM	DOXORUBICIN HYDROCHLORIDE		DTC
BLM	BLM	CHEMBL578741		DTC
BLM	BLM	CALMIDAZOLIUM CHLORIDE		DTC
BLM	BLM	CHEMBL337173		DTC
BLM	BLM	GENTIAN VIOLET		DTC
BLM	BLM	CHEMBL599013		DTC
BLM	BLM	IDARUBICIN		DTC
BLM	BLM	CHEMBL515505		DTC
BLM	BLM	CHEMBL578512		DTC
BLM	BLM	CHEMBL601140		DTC
C3	C3	COMPSTATIN		DTC	25494040
C3	C3	PEGCETACOPLAN		TTD
C3	C3	CLOZAPINE		PharmGKB	26503818
C5ORF56	IRF1-AS1	HYDROCHLOROTHIAZIDE		PharmGKB	31327267
CA14	CA14	HISTIDINE	activator	GuideToPharmacology
CA14	CA14	ACETAZOLAMIDE	inhibitor	GuideToPharmacology	10592235
CA14	CA14	ETHOXZOLAMIDE	inhibitor	ChemblInteractions,GuideToPharmacology
CA14	CA14	METHAZOLAMIDE	inhibitor	GuideToPharmacology
CA14	CA14	CHLORTHALIDONE	inhibitor	GuideToPharmacology
CA14	CA14	DORZOLAMIDE	inhibitor	GuideToPharmacology
CA14	CA14	BRINZOLAMIDE	inhibitor	GuideToPharmacology
CA14	CA14	PARABEN		TTD
CA14	CA14	SULFAMYLON		TTD
CA14	CA14	TRIENTINE		TTD
CA14	CA14	PHENOL		TTD
CA14	CA14	CURCUMIN		TTD
CAMK2G	CAMK2G	BOSUTINIB	inhibitor	GuideToPharmacology	23493838
CAMK2G	CAMK2G	SNS-314		DTC
CAMK2G	CAMK2G	CHEMBL541400		DTC
CAMK2G	CAMK2G	AZD-1080		DTC
CAMK2G	CAMK2G	SOTRASTAURIN		DTC
CAMK2G	CAMK2G	PF-00562271		DTC
CAMK2G	CAMK2G	LINIFANIB		DTC
CAMK2G	CAMK2G	CENISERTIB		DTC
CAMK2G	CAMK2G	DOVITINIB		DTC
CAMK2G	CAMK2G	TAE-684		DTC
CAMK2G	CAMK2G	GEFITINIB		DTC
CAMK2G	CAMK2G	LY-2090314		DTC
CAMK2G	CAMK2G	LITHIUM		NCI	12614997
CAMK2G	CAMK2G	R-406		DTC
CAMK2G	CAMK2G	HALOPERIDOL		NCI	12614997
CAMK2G	CAMK2G	CYC-116		DTC
CAMK2G	CAMK2G	SP-600125		DTC
CAMK2G	CAMK2G	ILORASERTIB		DTC
CAMK2G	CAMK2G	GW441756X		DTC
CASP8	CASP8	EMRICASAN	inhibitor	ChemblInteractions,GuideToPharmacology
CASP8	CASP8	NIVOCASAN	inhibitor	ChemblInteractions
CASP8	CASP8	CONATUMUMAB		CIViC	26291055
CASP8	CASP8	CHEMBL1210769		DTC
CASP8	CASP8	CHEMBL375563		DTC	17261067
CAST	CAST	ANDROSTANOLONE		NCI	12646165
CAST	CAST	STAUROSPORINE		NCI	12576481
CAST	CAST	EPINEPHRINE		NCI	10863002
CAST	CAST	THROMBIN		NCI	8358337
CATSPER1	CATSPER1	PROGESTERONE	activator	GuideToPharmacology
CATSPER1	CATSPER1	MIBEFRADIL	blocker	GuideToPharmacology
CATSPER1	CATSPER1	DINOPROSTONE	activator	GuideToPharmacology
CATSPER1	CATSPER1	ALPROSTADIL	activator	GuideToPharmacology
CCHCR1	CCHCR1	NEVIRAPINE		PharmGKB	21810746
CCND3	CCND3	ABEMACICLIB		ClearityFoundationBiomarkers
CCND3	CCND3	RIBOCICLIB		ClearityFoundationBiomarkers
CCND3	CCND3	PALBOCICLIB		CIViC	23079656
CCR2	CCR2	AZD2423	antagonist,allosteric modulator	ChemblInteractions,GuideToPharmacology,TTD
CCR2	CCR2	PF-04634817	antagonist	ChemblInteractions,GuideToPharmacology
CCR2	CCR2	CCX140	antagonist	TdgClinicalTrial,ChemblInteractions,TTD
CCR2	CCR2	PLOZALIZUMAB	antibody,antagonist	TdgClinicalTrial,ChemblInteractions,GuideToPharmacology
CCR2	CCR2	CHEMBL41275	antagonist	DTC,GuideToPharmacology	17715128
CCR2	CCR2	CENICRIVIROC	antagonist	ChemblInteractions,TTD
CCR2	CCR2	MK-0812		TTD
CCR2	CCR2	PIMAGEDINE		TTD
CCR2	CCR2	MORPHINE		NCI	16831471
CCR2	CCR2	SIMVASTATIN		NCI	15781755
CCR2	CCR2	PLERIXAFOR		DTC	17715128
CCR4	CCR4	MOGAMULIZUMAB	antibody,antagonist	MyCancerGenome,GuideToPharmacology,TTD	2.57927e+31
CCR4	CCR4	CHEMBL2018969	antagonist	GuideToPharmacology
CCR4	CCR4	GSK-2239633		TTD
CCR5	CCR5	MARAVIROC	antagonist	DTC,TdgClinicalTrial,ChemblInteractions,TEND,GuideToPharmacology,PharmGKB,TTD	1.62983e+47
CCR5	CCR5	ANCRIVIROC	antagonist	GuideToPharmacology
CCR5	CCR5	LERONLIMAB	antagonist,antibody	ChemblInteractions,GuideToPharmacology,TTD	1113427031903790
CCR5	CCR5	INCB-9471	antagonist	ChemblInteractions,TTD
CCR5	CCR5	CENICRIVIROC	antagonist	TdgClinicalTrial,ChemblInteractions,GuideToPharmacology,TTD
CCR5	CCR5	APLAVIROC HYDROCHLORIDE	antagonist	ChemblInteractions
CCR5	CCR5	CHEMBL41275	antagonist	GuideToPharmacology
CCR5	CCR5	VICRIVIROC MALEATE	antagonist	ChemblInteractions
CCR5	CCR5	PF-04634817	antagonist	ChemblInteractions
CCR5	CCR5	VICRIVIROC	antagonist	TdgClinicalTrial,GuideToPharmacology,TTD	1724306518495770
CCR5	CCR5	AZD5672	antagonist	ChemblInteractions,GuideToPharmacology
CCR5	CCR5	CHEMBL2018969	antagonist	GuideToPharmacology
CCR5	CCR5	APLAVIROC	antagonist	GuideToPharmacology
CCR5	CCR5	CHEMBL207004	antagonist	DTC,GuideToPharmacology,TTD	26451468
CCR5	CCR5	PF-232798		TTD
CCR6	CCR6	CHEMBL114544		DTC
CCR6	CCR6	CHEMBL592124		DTC
CD244	CD244	ALDESLEUKIN		NCI	7561164
CD247	CD247	MUROMONAB-CD3		TdgClinicalTrial	25033488861551
CD247	CD247	AZACITIDINE		NCI	15795105
CD247	CD247	BLINATUMOMAB		TdgClinicalTrial
CD27	CD27	VARLILUMAB		TTD
CD28	CD28	PROGESTERONE		NCI	11903384
CD28	CD28	BELATACEPT		TTD
CD28	CD28	BENZODEPA		TTD
CD28	CD28	CHEMBL445304		DTC	18003900
CD28	CD28	GELDANAMYCIN		NCI	9747895
CD28	CD28	ALDESLEUKIN		NCI	2156582
CD44	CD44	HYALURONAN		TdgClinicalTrial
CD44	CD44	PROGESTERONE		NCI	11605071
CD44	CD44	GENTAMICIN		NCI	14967965
CD5	CD5	INOSITOL		NCI	1371522
CD5	CD5	REGRAMOSTIM		NCI	10379842
CD5	CD5	IONOMYCIN		NCI	7540861
CD5	CD5	ZOLIMOMAB ARITOX		ChemblInteractions
CD6	CD6	ITOLIZUMAB	antibody	GuideToPharmacology,TTD
CD6	CD6	ONCOLYSIN CD6		ChemblInteractions
CD69	CD69	BENDAMUSTINE		CGI
CD69	CD69	TOCILIZUMAB		PharmGKB	27339827
CD84	CD84	ETANERCEPT		PharmGKB	27564082
CDC37	CDC37	SODIUM MOLYBDATE		DTC	21486005
CDC37	CDC37	GELDANAMYCIN		DTC	21486005
CDC42BPB	CDC42BPB	A-443654	inhibitor	GuideToPharmacology
CDH1	CDH1	BICALUTAMIDE		CGI
CDH1	CDH1	ERLOTINIB		JAX-CKB	26251290
CDH1	CDH1	LAPATINIB		JAX-CKB	26487584
CDH1	CDH1	SELUMETINIB		JAX-CKB	26251290
CDH1	CDH1	CAPECITABINE		JAX-CKB	26487584
CDH1	CDH1	VOLASERTIB		JAX-CKB	26597303
CDK2	CDK2	BOHEMINE	inhibitor	GuideToPharmacology
CDK2	CDK2	SU-9516	inhibitor	ChemblInteractions	1.05922e+31
CDK2	CDK2	ALVOCIDIB	inhibitor	MyCancerGenome,TdgClinicalTrial,ChemblInteractions,GuideToPharmacology	1846553811752350
CDK2	CDK2	BX-795	inhibitor	GuideToPharmacology
CDK2	CDK2	BMS-387032	inhibitor	TdgClinicalTrial,ChemblInteractions,GuideToPharmacology,CancerCommons,TTD
CDK2	CDK2	AT-7519	inhibitor	DTC,TdgClinicalTrial,ChemblInteractions,GuideToPharmacology,TTD	1059223518656910
CDK2	CDK2	AZD-5438	inhibitor	ChemblInteractions,TTD
CDK2	CDK2	DINACICLIB	inhibitor	DTC,MyCancerGenome,ClearityFoundationClinicalTrial,ChemblInteractions,GuideToPharmacology,CancerCommons,MyCancerGenomeClinicalTrial	23600925
CDK2	CDK2	ZOTIRACICLIB	inhibitor	DTC,ChemblInteractions,GuideToPharmacology,TTD	22148278
CDK2	CDK2	ALOISINE	inhibitor	GuideToPharmacology
CDK2	CDK2	MILCICLIB	inhibitor	DTC,ChemblInteractions,GuideToPharmacology	19603809
CDK2	CDK2	JNJ-7706621	inhibitor	GuideToPharmacology
CDK2	CDK2	RGB-286638	inhibitor	ChemblInteractions,GuideToPharmacology,TTD
CDK2	CDK2	PHA-793887	inhibitor	ChemblInteractions,TTD
CDK2	CDK2	CYC-065	inhibitor	TTD
CDK2	CDK2	AG-24322	inhibitor	ChemblInteractions,TTD
CDK2	CDK2	RG-547	inhibitor	ChemblInteractions	10592235
CDK2	CDK2	RONICICLIB	inhibitor	ChemblInteractions,GuideToPharmacology
CDK2	CDK2	CT-7001	inhibitor	GuideToPharmacology
CDK2	CDK2	SCH-900776	inhibitor	GuideToPharmacology
CDK2	CDK2	SELICICLIB	inhibitor	DTC,MyCancerGenome,TdgClinicalTrial,ChemblInteractions,GuideToPharmacology,TTD	1710810821080700
CDK2	CDK2	TRILACICLIB	inhibitor	GuideToPharmacology
CDK2	CDK2	UCN-01	inhibitor	ChemblInteractions
CDK2	CDK2	OLOMOUCINE	inhibitor	DTC	1.05922e+31
CDK2	CDK2	VORUCICLIB	inhibitor	GuideToPharmacology
CDK2	CDK2	(RS)-ROSCOVITINE		DTC
CDK2	CDK2	CHEMBL402915		DTC	18063365
CDK2	CDK2	CENISERTIB		DTC
CDK2	CDK2	PF-00562271		DTC
CDK2	CDK2	CYC-116		DTC
CDK2	CDK2	LY-2090314		DTC
CDK2	CDK2	SP-600125		DTC
CDK2	CDK2	CHEMBL379975		DTC
CDK2	CDK2	CHEMBL365617		DTC
CDK2	CDK2	DEXAMETHASONE		NCI	10867026
CDK2	CDK2	R-406		DTC
CDK2	CDK2	INDOLE-3-CARBINOL		NCI	15611077
CDK2	CDK2	GW441756X		DTC
CDK2	CDK2	LAUROGUADINE		DTC
CDK2	CDK2	O-CHLOROACETYLCARBAMOYLFUMAGILLOL		NCI	8012959
CDK2	CDK2	CHEMBL541400		DTC
CDK2	CDK2	RG-1530		DTC
CDK2	CDK2	CHIR-99021		DTC
CDK2	CDK2	CHEMBL225519		DTC
CDK2	CDK2	TAE-684		DTC
CDK2	CDK2	CHEMBL578061		DTC
CDK2	CDK2	KENPAULLONE		DTC
CDK2	CDK2	AZAKENPAULLONE		DTC
CDK2	CDK2	CHEMBL259850		DTC
CDK2	CDK2	GSK-269962A		DTC
CDK2	CDK2	CHEMBL373822		DTC	17181166
CDK2	CDK2	AZD-1080		DTC
CDK2	CDK2	GS 6201		DTC
CDK2	CDK2	CHEMBL557670		DTC	19410453
CDK2	CDK2	PACLITAXEL		NCI	16020661
CDK2	CDK2	CARBOPLATIN		CIViC	26006067
CDK2	CDK2	RESVERATROL		NCI	15122319
CDK2	CDK2	LOVASTATIN		NCI	9553123
CDK2	CDK2	RALTITREXED		NCI	10047461
CDK2	CDK2	CHEMBL210618		DTC
CDK2	CDK2	ALSTERPAULLONE		DTC
CDK2	CDK2	CHEMBL494107		DTC	17643111
CDK2	CDK2	BMS-345541		DTC
CDK2	CDK2	ERIBULIN		CIViC	26006067
CDK2	CDK2	ACETAMINOPHEN		NCI	14644624
CDK2	CDK2	SOTRASTAURIN		DTC
CDK2	CDK2	LAPACHONE		NCI	12689523
CDK2	CDK2	ANDROSTANOLONE		NCI	10698512
CDK2	CDK2	GO-6976		DTC
CDK6	CDK6	PALBOCICLIB	inhibitor	MyCancerGenome,ChemblInteractions,GuideToPharmacology,CancerCommons,MyCancerGenomeClinicalTrial	2820330115542780
CDK6	CDK6	PHA-793887	inhibitor	ChemblInteractions
CDK6	CDK6	ALVOCIDIB	inhibitor	DTC,MyCancerGenome,TdgClinicalTrial,ChemblInteractions	11752352
CDK6	CDK6	RIBOCICLIB	inhibitor,antagonist	MyCancerGenome,TdgClinicalTrial,ChemblInteractions,CGI,CIViC,TTD	2404517929408320
CDK6	CDK6	LEROCICLIB	inhibitor	GuideToPharmacology,TTD
CDK6	CDK6	AT-7519	inhibitor	ChemblInteractions,GuideToPharmacology
CDK6	CDK6	ABEMACICLIB	inhibitor	ChemblInteractions,GuideToPharmacology,CancerCommons,TTD	24919854
CDK6	CDK6	VORUCICLIB	inhibitor	GuideToPharmacology
CDK6	CDK6	RIBOCICLIB SUCCINATE	inhibitor	ChemblInteractions
CDK6	CDK6	RGB-286638	inhibitor	GuideToPharmacology
CDK6	CDK6	AZD-5438	inhibitor	ChemblInteractions
CDK6	CDK6	G1T28-1	inhibitor	ChemblInteractions,TTD
CDK6	CDK6	UCN-01	inhibitor	ChemblInteractions
CDK6	CDK6	RONICICLIB	inhibitor	ChemblInteractions
CDK6	CDK6	TRILACICLIB	inhibitor	GuideToPharmacology,TTD
CDK6	CDK6	DEXAMETHASONE		CIViC	29408328
CDK6	CDK6	FULVESTRANT		CIViC	27252418
CDK6	CDK6	APREMILAST		TTD
CDKN1A	CDKN1A	CARBOPLATIN		NCI	12168940
CDKN1A	CDKN1A	NICOTINE		NCI	16011614
CDKN1A	CDKN1A	DEOXYCYTIDINE		NCI	16276353
CDKN1A	CDKN1A	VINBLASTINE		NCI	8763853
CDKN1A	CDKN1A	IRINOTECAN HYDROCHLORIDE		NCI	12032863
CDKN1A	CDKN1A	MELPHALAN		NCI	11507071
CDKN1A	CDKN1A	DIAZIQUONE		NCI	8943236
CDKN1A	CDKN1A	DICUMAROL		NCI	9343371
CDKN1A	CDKN1A	PENTETIC ACID		NCI	9343371
CDKN1A	CDKN1A	CYCLOSPORINE		NCI	11827957
CDKN1A	CDKN1A	CLADRIBINE		NCI	12473386
CDKN1A	CDKN1A	ACETAMINOPHEN		NCI	16330492
CDKN1A	CDKN1A	EPOETIN BETA		NCI	11023508
CDKN1A	CDKN1A	PACLITAXEL		NCI	12574211
CDKN1A	CDKN1A	CELECOXIB		PharmGKB	22336956
CDKN1A	CDKN1A	ROMIDEPSIN		NCI	15014036
CDKN1A	CDKN1A	FLUTAMIDE		NCI	16281084
CDKN1A	CDKN1A	FLUOROURACIL		NCI,CIViC	2470848415067350
CDKN2D	CDKN2D	ROMIDEPSIN		NCI	11753657
CFD	CFD	LAMPALIZUMAB	antibody	GuideToPharmacology
CFL1	CFL1	PATULIN		DTC	16680159
CFL1	CFL1	CLOTRIMAZOLE		DTC	16680159
CFL1	CFL1	ROTENONE		DTC	16680159
CFL1	CFL1	CLOFIBRATE		DTC	16680159
CFL1	CFL1	FENOFIBRATE		DTC	16680159
CFL1	CFL1	MG-132		DTC	16680159
CFL1	CFL1	CINNARIZINE		DTC	16680159
CFL1	CFL1	SERTRALINE		DTC	16680159
CH25H	CH25H	TABIMORELIN	inhibitor	ChemblInteractions
CH25H	CH25H	COBICISTAT	inhibitor	ChemblInteractions
CHD1	CHD1	EPIRUBICIN	antagonist	TdgClinicalTrial,TEND	1713928417016420
CHD4	CHD4	VORINOSTAT		PharmGKB	26296641
CHRNB2	CHRNB2	NICOTINE	agonist	DTC,TdgClinicalTrial,ChemblInteractions,TEND,PharmGKB	1.66368e+63
CHRNB2	CHRNB2	CP-601927	partial agonist	ChemblInteractions
CHRNB2	CHRNB2	POZANICLINE	partial agonist	TdgClinicalTrial,ChemblInteractions
CHRNB2	CHRNB2	VARENICLINE TARTRATE	agonist	ChemblInteractions
CHRNB2	CHRNB2	ABT-560	modulator	ChemblInteractions
CHRNB2	CHRNB2	TEBANICLINE	agonist	ChemblInteractions
CHRNB2	CHRNB2	AZD1446	agonist	ChemblInteractions
CHRNB2	CHRNB2	SOFINICLINE	agonist	ChemblInteractions
CHRNB2	CHRNB2	ISPRONICLINE	partial agonist	TdgClinicalTrial,ChemblInteractions
CHRNB2	CHRNB2	ALTINICLINE	agonist	ChemblInteractions
CHRNB2	CHRNB2	TC-6499	agonist	TdgClinicalTrial,ChemblInteractions
CHRNB2	CHRNB2	DEXMECAMYLAMINE	antagonist	TdgClinicalTrial,ChemblInteractions,TTD
CHRNB2	CHRNB2	TC-2216	antagonist	ChemblInteractions
CHRNB2	CHRNB2	NICOTINE POLACRILEX	agonist	ChemblInteractions
CHRNB2	CHRNB2	VARENICLINE	partial agonist	TdgClinicalTrial	16883648
CHRNB2	CHRNB2	CYTISINICLINE	partial agonist	TTD	20331614
CLK3	CLK3	HARMINE		DTC	22998443
CLK3	CLK3	LEUCETTAMINE B		DTC	22998443
CNGA1	CNGA1	DEQUALINIUM	blocker	GuideToPharmacology,TTD	12508052
COIL	COIL	EPIGALOCATECHIN GALLATE		NCI	16046615
CSK	CSK	RIVOCERANIB	inhibitor	GuideToPharmacology
CSK	CSK	HESPERADIN	inhibitor	DTC	19035792
CSK	CSK	HYDROCHLOROTHIAZIDE		PharmGKB	31327267
CTDSP1	CTDSP1	KAEMPFEROL		DTC
CTDSP1	CTDSP1	CHEMBL527307		DTC
CTDSP1	CTDSP1	CHEMBL258756		DTC
CTDSP1	CTDSP1	HESPERIDIN		DTC
CTDSP1	CTDSP1	CEFACLOR		DTC
CTDSP1	CTDSP1	CEFUROXIME SODIUM		DTC
CTDSP1	CTDSP1	CHEMBL477936		DTC
CTDSP1	CTDSP1	CHEMBL1443422		DTC
CTDSP1	CTDSP1	NALOXONE METHIODIDE		DTC
CTDSP1	CTDSP1	CHEMBL581449		DTC
CTDSP1	CTDSP1	CHEMBL598477		DTC
CTDSP1	CTDSP1	ISOPROPAMIDE IODIDE		DTC
CTDSP1	CTDSP1	LITHOCHOLIC ACID		DTC
CTDSP1	CTDSP1	CHEMBL484640		DTC
CTDSP1	CTDSP1	STILONIUM IODIDE		DTC
CTDSP1	CTDSP1	CEFDINIR		DTC
CTDSP1	CTDSP1	CHEMBL176599		DTC
CTDSP1	CTDSP1	CHEMBL528734		DTC
CTDSP1	CTDSP1	CEPHALOTHIN		DTC
CTLA4	CTLA4	TREMELIMUMAB	antibody,inhibitor	TALC,MyCancerGenome,TdgClinicalTrial,ChemblInteractions,GuideToPharmacology,TTD
CTLA4	CTLA4	IPILIMUMAB	antibody,inhibitor	TALC,MyCancerGenome,TdgClinicalTrial,ClearityFoundationClinicalTrial,ChemblInteractions,GuideToPharmacology,CancerCommons,TTD	18049334
CTLA4	CTLA4	BLEOMYCIN		NCI	11489978
CTLA4	CTLA4	PREDNISONE		PharmGKB	21228734
CTLA4	CTLA4	ATEZOLIZUMAB		CIViC	25428504
CTLA4	CTLA4	BORTEZOMIB		PharmGKB	21228734
CTLA4	CTLA4	ABATACEPT		NCI	9758890
CTLA4	CTLA4	METHIMAZOLE		NCI	15504312
CTLA4	CTLA4	DEXAMETHASONE		PharmGKB	21228734
CTLA4	CTLA4	SIROLIMUS		NCI	798290711698435
CTLA4	CTLA4	THALIDOMIDE		NCI	10823791
CTLA4	CTLA4	MELPHALAN		PharmGKB	21228734
CTLA4	CTLA4	ZALIFRELIMAB		TTD
CTLA4	CTLA4	WORTMANNIN		NCI	10464177
CTLA4	CTLA4	ANTIBIOTIC		NCI	10030847
CTLA4	CTLA4	TACROLIMUS		PharmGKB
CTLA4	CTLA4	ALCOHOL		NCI	11025487
CTLA4	CTLA4	CYCLOSPORINE		PharmGKB	18021981
CTSD	CTSD	STREPTOZOCIN		NCI	3282952
CYP11A1	CYP11A1	MITOTANE	inhibitor	ChemblInteractions,GuideToPharmacology
CYP11A1	CYP11A1	AMINOGLUTETHIMIDE	inhibitor	ChemblInteractions,TTD	1.17524e+23
CYP27B1	CYP27B1	CHEMBL255088	inhibitor	GuideToPharmacology
CYP27B1	CYP27B1	DEFERASIROX		PharmGKB	30651574
CYP27B1	CYP27B1	CHEMBL2036072		DTC	22404326
CYP27B1	CYP27B1	RIBAVIRIN		PharmGKB	21145801
CYTH2	CYTH2	CLOTRIMAZOLE		DTC
DAGLB	DAGLB	ORLISTAT	inhibitor	DTC,GuideToPharmacology	18657971
DBP	DBP	ALBUMIN HUMAN		NCI	2331750
DDC	DDC	CARBIDOPA	inhibitor	TdgClinicalTrial,ChemblInteractions,TEND,GuideToPharmacology,PharmGKB,TTD	1.28858e+55
DDC	DDC	BENSERAZIDE	inhibitor	GuideToPharmacology,TTD
DDC	DDC	SIROLIMUS		NCI	16126007
DDC	DDC	NICOTINE		PharmGKB	16740595
DNMT3A	DNMT3A	DECITABINE	inhibitor	JAX-CKB,ChemblInteractions,CIViC	2212421327418640
DNMT3A	DNMT3A	AZACITIDINE	inhibitor	ChemblInteractions
DNMT3A	DNMT3A	WARFARIN		PharmGKB	27740732
DNMT3A	DNMT3A	IDARUBICIN		CIViC	22081665
DNMT3A	DNMT3A	DAUNORUBICIN		CGI
DTYMK	DTYMK	ZIDOVUDINE		PharmGKB	22960662
DTYMK	DTYMK	STAVUDINE		NCI	15134538
DTYMK	DTYMK	ALCOHOL		NCI	11923581
DTYMK	DTYMK	FLUOROURACIL		NCI	15067352
DUSP1	DUSP1	HYDROXYUREA		NCI	15856297
DUSP1	DUSP1	ALBUTEROL		PharmGKB	20673984
DUSP1	DUSP1	VASOPRESSIN		NCI	9231829
EHMT2	EHMT2	CHEMBL569864	inhibitor	GuideToPharmacology
EHMT2	EHMT2	CLIOQUINOL		DTC
EHMT2	EHMT2	CHEMBL520992		DTC
EHMT2	EHMT2	MORIN		DTC
EHMT2	EHMT2	ACTINONIN		DTC
EHMT2	EHMT2	CHLORPROMAZINE HYDROCHLORIDE		DTC
EHMT2	EHMT2	CHEMBL527585		DTC
EHMT2	EHMT2	CHEMBL588038		DTC
EHMT2	EHMT2	CHEMBL579742		DTC
EHMT2	EHMT2	PROPYLENE GLYCOL MONOSTEARATE		DTC
EHMT2	EHMT2	LOVASTATIN		DTC
EHMT2	EHMT2	DIMETHYLPHENYLPIPERAZINIUM		DTC
EHMT2	EHMT2	VITAMIN B2		DTC
EHMT2	EHMT2	NOMIFENSINE		DTC
EHMT2	EHMT2	MYRICETIN		DTC
EHMT2	EHMT2	ESTRADIOL		DTC
EHMT2	EHMT2	PROPRANOLOL		DTC
EHMT2	EHMT2	AURINTRICARBOXYLIC ACID		DTC
EHMT2	EHMT2	TYRPHOSTIN 23		DTC
EHMT2	EHMT2	CHEMBL1256484		DTC
EHMT2	EHMT2	CHEMBL527336		DTC
EHMT2	EHMT2	GAMMA-AMINOBUTYRIC ACID		DTC
EHMT2	EHMT2	BIS(DIMETHYLAMINETHIOCARBONYL)MONOSULFIDE		DTC
EHMT2	EHMT2	CHEMBL175266		DTC
EHMT2	EHMT2	ZAPA		DTC
EHMT2	EHMT2	DAPHNETIN		DTC
EHMT2	EHMT2	CHEMBL603024		DTC
EHMT2	EHMT2	CHLOROXINE		DTC
EHMT2	EHMT2	DOCONEXENT		DTC
EHMT2	EHMT2	CHEMBL1408276		DTC
EHMT2	EHMT2	CHEMBL578896		DTC
EHMT2	EHMT2	CHEMBL525888		DTC
EHMT2	EHMT2	DOCEBENONE		DTC
EHMT2	EHMT2	CHEMBL338314		DTC
EHMT2	EHMT2	CHEMBL591864		DTC
EHMT2	EHMT2	CHEMBL577851		DTC
EHMT2	EHMT2	THIOGUANINE		DTC
EHMT2	EHMT2	(D)-SERINE		DTC
EHMT2	EHMT2	IBUFENAC		DTC
EHMT2	EHMT2	CHEMBL589734		DTC
EHMT2	EHMT2	PURPUROGALLIN		DTC
EHMT2	EHMT2	CHEMBL56393		DTC
EHMT2	EHMT2	INAMRINONE		DTC
EHMT2	EHMT2	DOXYCYCLINE		DTC
EHMT2	EHMT2	DIAMIDE		DTC
EHMT2	EHMT2	CHEMBL522983		DTC
EHMT2	EHMT2	AGROCLAVINE		DTC
EHMT2	EHMT2	QUINACRINE		DTC
EHMT2	EHMT2	KETANSERIN		DTC
EHMT2	EHMT2	CHEMBL1576310		DTC
EHMT2	EHMT2	METHYLSELENOCYSTEINE		DTC
EHMT2	EHMT2	PIRENZEPINE HYDROCHLORIDE		DTC
EHMT2	EHMT2	BOPINDOLOL		DTC
EHMT2	EHMT2	DEFERIPRONE		DTC
EHMT2	EHMT2	CHEMBL590949		DTC
EHMT2	EHMT2	CHEMBL534214		DTC
EHMT2	EHMT2	CHEMBL523200		DTC
EHMT2	EHMT2	ALITRETINOIN		DTC
EHMT2	EHMT2	METHYLDOPA		DTC
EHMT2	EHMT2	CHEMBL547656		DTC
EHMT2	EHMT2	QUINELORANE		DTC
EHMT2	EHMT2	N-METHYLHISTAMINE		DTC
EHMT2	EHMT2	CAPENSIN		DTC
EHMT2	EHMT2	U-0126		DTC
EHMT2	EHMT2	DIETHYLCARBAMAZINE CITRATE		DTC
EHMT2	EHMT2	CHEMBL1232076		DTC
EHMT2	EHMT2	ACID BLUE 129		DTC
EHMT2	EHMT2	PAPAVERINE		DTC
EHMT2	EHMT2	GALLAMINE		DTC
EHMT2	EHMT2	PROCHLORPERAZINE		DTC
EHMT2	EHMT2	CHEMBL597246		DTC
EHMT2	EHMT2	CHEMBL534288		DTC
EHMT2	EHMT2	CHEMBL600692		DTC
EHMT2	EHMT2	(4-CHLOROPHENYL)(MORPHOLINO)METHANETHIONE		DTC
EHMT2	EHMT2	CHEMBL592124		DTC
EHMT2	EHMT2	CHEMBL1256776		DTC
EHMT2	EHMT2	ELLAGIC ACID		DTC
EHMT2	EHMT2	RESERPINE		DTC
EHMT2	EHMT2	CHEMBL1270169		DTC
EHMT2	EHMT2	CYSTEAMINE		DTC
EHMT2	EHMT2	DEMECLOCYCLINE HYDROCHLORIDE		DTC
EHMT2	EHMT2	CHEMBL600734		DTC
EHMT2	EHMT2	CAFFEIC ACID		DTC
EHMT2	EHMT2	ANTHRALIN		DTC
EHMT2	EHMT2	CHEMBL529741		DTC
EHMT2	EHMT2	DIACEREIN		DTC
EHMT2	EHMT2	ERGOCRYPTINE		DTC
EHMT2	EHMT2	PORFIROMYCIN		DTC
EHMT2	EHMT2	ARACHIDONOYL DOPAMINE		DTC
EHMT2	EHMT2	PALMITOYL-CARNITINE		DTC
EHMT2	EHMT2	YOHIMBINE		DTC
EHMT2	EHMT2	SPERMIDINE		DTC
EHMT2	EHMT2	CHOLECALCIFEROL		DTC
EHMT2	EHMT2	DEQUALINIUM CHLORIDE		DTC
EHMT2	EHMT2	FLUSPIRILENE		DTC
EHMT2	EHMT2	SB-202190		DTC
EHMT2	EHMT2	QUINPIROLE		DTC
EHMT2	EHMT2	SHIKONIN		DTC
EHMT2	EHMT2	CHEMBL444928		DTC
EHMT2	EHMT2	HELENALIN		DTC
EHMT2	EHMT2	BISMUTH SUBSALICYLATE		DTC
EHMT2	EHMT2	DAMNACANTHAL		DTC
EHMT2	EHMT2	NICLOSAMIDE		DTC
EHMT2	EHMT2	CHEMBL275177		DTC
EHMT2	EHMT2	CHEMBL1546228		DTC
EHMT2	EHMT2	FLUPIRTINE		DTC
EHMT2	EHMT2	QUISQUALATE		DTC
EHMT2	EHMT2	CGP-71683A		DTC
EHMT2	EHMT2	DEPHOSTATIN		DTC
EHMT2	EHMT2	FENOLDOPAM BROMIDE		DTC
EHMT2	EHMT2	CHEMBL1545737		DTC
EHMT2	EHMT2	CHEMBL403741		DTC
EHMT2	EHMT2	R-N-PROPYLNORAPOMORPHINE		DTC
EHMT2	EHMT2	CHEMBL261557		DTC
EHMT2	EHMT2	CHEMBL211042		DTC
EHMT2	EHMT2	OXOTREMORINE METHIODIDE		DTC
EHMT2	EHMT2	ENOXAMAST		DTC
EHMT2	EHMT2	CHEMBL313737		DTC
EHMT2	EHMT2	BETAXOLOL HYDROCHLORIDE		DTC
EHMT2	EHMT2	CHEMBL328710		DTC
EHMT2	EHMT2	CHEMBL1728978		DTC
EHMT2	EHMT2	CHEMBL602408		DTC
EHMT2	EHMT2	CHEMBL1478462		DTC
EHMT2	EHMT2	CATECHOL		DTC
EHMT2	EHMT2	TALIPEXOLE HYDROCHLORIDE		DTC
EHMT2	EHMT2	CHEMBL284609		DTC
EHMT2	EHMT2	APAZONE		DTC
EHMT2	EHMT2	SKF-38393		DTC
EHMT2	EHMT2	PHENAZINE-1-CARBOXYLIC ACID		DTC
EHMT2	EHMT2	ADEFOVIR DIPIVOXIL		DTC
EHMT2	EHMT2	CHEMBL512649		DTC
EHMT2	EHMT2	IODOPHTHALEIN		DTC
EHMT2	EHMT2	IODOQUINOL		DTC
EHMT2	EHMT2	CHEMBL532143		DTC
EHMT2	EHMT2	METHOTREXATE		DTC
EHMT2	EHMT2	MERCURIC CHLORIDE		DTC
EHMT2	EHMT2	CHEMBL580816		DTC
EHMT2	EHMT2	CHEMBL578294		DTC
EHMT2	EHMT2	TALIPEXOLE		DTC
EHMT2	EHMT2	CHEMBL592834		DTC
EHMT2	EHMT2	CHEMBL2095095		DTC
EHMT2	EHMT2	CHEMBL461579		DTC
EHMT2	EHMT2	METHYSERGIDE		DTC
EHMT2	EHMT2	PROSTAGLANDIN A2		DTC
EHMT2	EHMT2	4-DAMP		DTC
EHMT2	EHMT2	GALLIC ACID		DTC
EHMT2	EHMT2	ERGOCRISTINE		DTC
EHMT2	EHMT2	PYRITHIONE		DTC
EHMT2	EHMT2	CHEMBL599957		DTC
EHMT2	EHMT2	CHEMBL548615		DTC
EHMT2	EHMT2	CHEMBL580340		DTC
EHMT2	EHMT2	RALOXIFENE HYDROCHLORIDE		DTC
EHMT2	EHMT2	SURAMIN HEXASODIUM		DTC
EHMT2	EHMT2	EPINEPHRINE BITARTRATE		DTC
EHMT2	EHMT2	ARUNDINE		DTC
EHMT2	EHMT2	CHEMBL24983		DTC
EHMT2	EHMT2	S-NITROSOGLUTATHIONE		DTC
EHMT2	EHMT2	MESALAMINE		DTC
EHMT2	EHMT2	MIANSERIN HYDROCHLORIDE		DTC
EHMT2	EHMT2	GLAUCINE METHIODIDE		DTC
EHMT2	EHMT2	CHEMBL527586		DTC
EHMT2	EHMT2	CHEMBL589694		DTC
EHMT2	EHMT2	METAPHIT METHANESULFONATE		DTC
EHMT2	EHMT2	ICILLIN		DTC
EHMT2	EHMT2	TAMOXIFEN CITRATE		DTC
EHMT2	EHMT2	CHEMBL1256396		DTC
EHMT2	EHMT2	LAVENDUSTIN A		DTC
EHMT2	EHMT2	MIFEPRISTONE		DTC
EHMT2	EHMT2	CHEMBL603370		DTC
EHMT2	EHMT2	CHEMBL532160		DTC
EHMT2	EHMT2	CHEMBL585656		DTC
EHMT2	EHMT2	CAMPTOTHECIN		DTC
EHMT2	EHMT2	THIOGUANOSINE		DTC
EHMT2	EHMT2	DIAZOXIDE		DTC
EHMT2	EHMT2	HERACLENOL		DTC
EHMT2	EHMT2	IDARUBICIN		DTC
EHMT2	EHMT2	CHEMBL582496		DTC
EHMT2	EHMT2	CHEMBL602923		DTC
EHMT2	EHMT2	NARINGIN		DTC
EHMT2	EHMT2	PICEATANNOL		DTC
EHMT2	EHMT2	CYSTAMINE		DTC
EHMT2	EHMT2	2'-HYDROXYCHALCONE		DTC
EHMT2	EHMT2	CHEMBL186526		DTC
EHMT2	EHMT2	BUFLOMEDIL		DTC
EHMT2	EHMT2	CROCIN		DTC
EHMT2	EHMT2	PYRROLIDINE DITHIOCARBAMIC ACID, AMMONIUM SALT		DTC
EHMT2	EHMT2	PHOSMET		DTC
EHMT2	EHMT2	E319		DTC
EHMT2	EHMT2	N-METHYL-D-ASPARTIC ACID (NMDA)		DTC
EHMT2	EHMT2	GUANFACINE		DTC
EHMT2	EHMT2	BRILLIANT GREEN OXALATE		DTC
EHMT2	EHMT2	CHEMBL1385558		DTC
EHMT2	EHMT2	DEXBROMPHENIRAMINE		DTC
EHMT2	EHMT2	CHEMBL1256876		DTC
EHMT2	EHMT2	CHEMBL582478		DTC
EHMT2	EHMT2	CHEMBL527584		DTC
EHMT2	EHMT2	APOMORPHINE HYDROCHLORIDE HEMIHYDRATE		DTC
EHMT2	EHMT2	PHENINDIONE		DTC
EHMT2	EHMT2	CHEMBL591628		DTC
EHMT2	EHMT2	HISPIDIN		DTC
EHMT2	EHMT2	LAVENDUSTIN C		DTC
EHMT2	EHMT2	MEDRONIC ACID		DTC
EHMT2	EHMT2	CHEMBL577222		DTC
EHMT2	EHMT2	CYSTEINE		DTC
EHMT2	EHMT2	BISINDOLYLMALEIMIDE IX		DTC
EHMT2	EHMT2	DOXORUBICIN HYDROCHLORIDE		DTC
EHMT2	EHMT2	PALIPERIDONE		DTC
EHMT2	EHMT2	SULFAPYRIDINE		DTC
EHMT2	EHMT2	CHEMBL589715		DTC
EHMT2	EHMT2	NORDEXFENFLURAMINE		DTC
EHMT2	EHMT2	CHEMBL1335833		DTC
EHMT2	EHMT2	CHEMBL1503729		DTC
EHMT2	EHMT2	CHEMBL122355		DTC
EHMT2	EHMT2	GYKI-52466		DTC
EHMT2	EHMT2	CHEMBL547269		DTC
EHMT2	EHMT2	BENFLUOREX HYDROCHLORIDE		DTC
EHMT2	EHMT2	HYPEROSIDE		DTC
EHMT2	EHMT2	TRYPTOPHAN		DTC
EHMT2	EHMT2	CAPTAN		DTC
EHMT2	EHMT2	INDIGOTINDISULFONATE		DTC
EHMT2	EHMT2	DYCLONINE		DTC
EHMT2	EHMT2	HYDROQUINONE		DTC
EHMT2	EHMT2	BENSERAZIDE		DTC
EHMT2	EHMT2	ROTTLERIN		DTC
EHMT2	EHMT2	PHYSOSTIGMINE		DTC
EHMT2	EHMT2	CHEMBL576409		DTC
EHMT2	EHMT2	GALLAMINE TRIETHIODIDE		DTC
EHMT2	EHMT2	(+)-TAXIFOLIN		DTC
EHMT2	EHMT2	NORFLOXACIN		DTC
EHMT2	EHMT2	CHEMBL1255656		DTC
EHMT2	EHMT2	CHEMBL559934		DTC
EHMT2	EHMT2	PIRETANIDE		DTC
EHMT2	EHMT2	CHEMBL1256364		DTC
EHMT2	EHMT2	CHEMBL585502		DTC
EHMT2	EHMT2	SALSOLINOL HYDROBROMIDE		DTC
EHMT2	EHMT2	CHEMBL592558		DTC
EHMT2	EHMT2	CHEMBL515495		DTC
EHMT2	EHMT2	CHEMBL1509789		DTC
EHMT2	EHMT2	CHEMBL584868		DTC
EHMT2	EHMT2	PROMETHAZINE		DTC
EHMT2	EHMT2	CHEMBL607309		DTC
EHMT2	EHMT2	CHEMBL19954		DTC
EHMT2	EHMT2	CHEMBL104264		DTC
EHMT2	EHMT2	CHEMBL565893		DTC
EHMT2	EHMT2	CHEMBL1363249		DTC
EHMT2	EHMT2	Z-PRO-PROLINAL		DTC
EHMT2	EHMT2	CHEMBL322970		DTC
EHMT2	EHMT2	CHEMBL1256845		DTC
EHMT2	EHMT2	CHEMBL338115		DTC
EHMT2	EHMT2	CHEMBL528119		DTC
EHMT2	EHMT2	CHEMBL581152		DTC
EHMT2	EHMT2	CYCLOBENZAPRINE HYDROCHLORIDE		DTC
EHMT2	EHMT2	CHEMBL56731		DTC
EHMT2	EHMT2	CHEMBL601364		DTC
EHMT2	EHMT2	CHEMBL589479		DTC
EHMT2	EHMT2	ALFUZOSIN		DTC
EHMT2	EHMT2	CHEMBL27403		DTC
EHMT2	EHMT2	CHEMBL121915		DTC
EHMT2	EHMT2	TAMOXIFEN		DTC
EHMT2	EHMT2	OMEPRAZOLE		DTC
EHMT2	EHMT2	CHEMBL601367		DTC
EHMT2	EHMT2	CHEMBL584458		DTC
EHMT2	EHMT2	CHEMBL32307		DTC
EHMT2	EHMT2	CHEMBL88553		DTC
EHMT2	EHMT2	CHEMBL224032		DTC
EHMT2	EHMT2	SPICLOMAZINE		DTC
EHMT2	EHMT2	KETOCONAZOLE		DTC
EHMT2	EHMT2	TINORIDINE		DTC
EHMT2	EHMT2	CHEMBL1256510		DTC
EHMT2	EHMT2	BAY-11-7085		DTC
EHMT2	EHMT2	CHEMBL398765		DTC
EHMT2	EHMT2	CHEMBL589469		DTC
EHMT2	EHMT2	CHEMBL313938		DTC
EHMT2	EHMT2	CHEMBL586982		DTC
EHMT2	EHMT2	PAROXETINE HYDROCHLORIDE		DTC
EHMT2	EHMT2	DYCLONINE HYDROCHLORIDE		DTC
EHMT2	EHMT2	CHEMBL580076		DTC
EHMT2	EHMT2	RANITIDINE		DTC
EHMT2	EHMT2	CHEMBL590186		DTC
EHMT2	EHMT2	IODOACETAMIDE		DTC
EHMT2	EHMT2	CHEMBL1256797		DTC
EHMT2	EHMT2	2-MERCAPTONICOTINIC ACID		DTC
EHMT2	EHMT2	CHEMBL583150		DTC
EHMT2	EHMT2	CHEMBL1984884		DTC
EHMT2	EHMT2	IMETIT		DTC
EHMT2	EHMT2	OXITRIPTAN		DTC
EHMT2	EHMT2	5-BENZYLOXYTRYPTAMINE		DTC
EHMT2	EHMT2	CHEMBL339587		DTC
EHMT2	EHMT2	SARCOLYSIN		DTC
EHMT2	EHMT2	METHYLERGONOVINE		DTC
EHMT2	EHMT2	CHEMBL1341830		DTC
EHMT2	EHMT2	FLUTAMIDE		DTC
EHMT2	EHMT2	CHEMBL129841		DTC
EHMT2	EHMT2	CHEMBL585030		DTC
EHMT2	EHMT2	METIZOLINE		DTC
EHMT2	EHMT2	CHEMBL1256885		DTC
EHMT2	EHMT2	CHEMBL171699		DTC
EHMT2	EHMT2	CHEMBL387632		DTC
EHMT2	EHMT2	CHEMBL1255936		DTC
EHMT2	EHMT2	METERGOLINE		DTC
EHMT2	EHMT2	CHEMBL316796		DTC
EHMT2	EHMT2	METITEPINE		DTC
EHMT2	EHMT2	ERGOCALCIFEROL		DTC
EHMT2	EHMT2	NALIDIXIC ACID		DTC
EHMT2	EHMT2	CHLOROGENIC ACID		DTC
EHMT2	EHMT2	CHEMBL533577		DTC
EHMT2	EHMT2	8-OH-DPAT		DTC
EHMT2	EHMT2	CHEMBL578504		DTC
EHMT2	EHMT2	DIHYDREXIDINE HYDROCHLORIDE		DTC
EHMT2	EHMT2	HYDROXYZINE PAMOATE		DTC
EHMT2	EHMT2	PHENAZINE		DTC
EHMT2	EHMT2	TYRPHOSTIN 25		DTC
EHMT2	EHMT2	WORTMANNIN		DTC
EHMT2	EHMT2	RHEIN		DTC
EHMT2	EHMT2	PROROXAN		DTC
EHMT2	EHMT2	CHEMBL505670		DTC
EHMT2	EHMT2	CHEMBL598268		DTC
EHMT2	EHMT2	CEFOTAXIME		DTC
EHMT2	EHMT2	CHEMBL581872		DTC
EHMT2	EHMT2	EPHEDRINE SULFATE		DTC
EHMT2	EHMT2	DOXYLAMINE		DTC
EHMT2	EHMT2	TELENZEPINE		DTC
EHMT2	EHMT2	CHEMBL537045		DTC
EHMT2	EHMT2	MITOXANTRONE HYDROCHLORIDE		DTC
EHMT2	EHMT2	(R,S)-AMPA		DTC
EHMT2	EHMT2	CHEMBL297304		DTC
EHMT2	EHMT2	CHEMBL596836		DTC
EHMT2	EHMT2	CHEMBL590666		DTC
EHMT2	EHMT2	CHEMBL602776		DTC
EHMT2	EHMT2	DIPYRITHIONE		DTC
EHMT2	EHMT2	LEVISOPRENALINE		DTC
EHMT2	EHMT2	CEPHALOTHIN SODIUM		DTC
EHMT2	EHMT2	RESCINNAMINE		DTC
EHMT2	EHMT2	CYCLOSERINE		DTC
EHMT2	EHMT2	CHEMBL600306		DTC
EHMT2	EHMT2	CHEMBL1256863		DTC
EHMT2	EHMT2	BENANSERIN HYDROCHLORIDE		DTC
EHMT2	EHMT2	CLINAFLOXACIN		DTC
EHMT2	EHMT2	FENRETINIDE		DTC
EHMT2	EHMT2	TRETINOIN		DTC
EHMT2	EHMT2	CYCLOPHOSPHAMIDE		DTC
EHMT2	EHMT2	CHEMBL538104		DTC
EHMT2	EHMT2	CHEMBL1256995		DTC
EHMT2	EHMT2	CHEMBL84010		DTC
EHMT2	EHMT2	TROLOX		DTC
EHMT2	EHMT2	CHEMBL235891		DTC
EHMT2	EHMT2	CHEMBL1486366		DTC
EHMT2	EHMT2	UMIFENOVIR		DTC
EHMT2	EHMT2	GABACULINE HYDROCHLORIDE		DTC
EHMT2	EHMT2	FLUMEQUINE		DTC
EHMT2	EHMT2	FLUNARIZINE		DTC
EHMT2	EHMT2	EPIGALOCATECHIN GALLATE		DTC
EHMT2	EHMT2	SYROSINGOPINE		DTC
EHMT2	EHMT2	CGP-53353		DTC
EHMT2	EHMT2	GR-127935		DTC
EHMT2	EHMT2	CEFOTAXIME SODIUM		DTC
EHMT2	EHMT2	METHYLMALONIC ACID		DTC
EHMT2	EHMT2	CHEMBL179611		DTC
EHMT2	EHMT2	CHEMBL86464		DTC
EHMT2	EHMT2	LONIDAMINE		DTC
EHMT2	EHMT2	CLOMETHIAZOLE		DTC
EHMT2	EHMT2	CHEMBL279556		DTC
EHMT2	EHMT2	SEMAXANIB		DTC
EHMT2	EHMT2	CHEMBL1160508		DTC
EHMT2	EHMT2	CHEMBL1256738		DTC
EHMT2	EHMT2	CHEMBL316589		DTC
EHMT2	EHMT2	OLPRINONE		DTC
EHMT2	EHMT2	TRANSTORINE		DTC
EHMT2	EHMT2	CHEMBL602807		DTC
EHMT2	EHMT2	CHEMBL1310138		DTC
EHMT2	EHMT2	FENOLDOPAM		DTC
EHMT2	EHMT2	CHEMBL395915		DTC
EHMT2	EHMT2	THIOINOSINE		DTC
EHMT2	EHMT2	CHLOROETHYLCLONIDINE		DTC
EHMT2	EHMT2	CHEMBL547483		DTC
EHMT2	EHMT2	METHOCTRAMINE		DTC
EHMT2	EHMT2	ENROFLOXACIN		DTC
EHMT2	EHMT2	BRIMONIDINE		DTC
EHMT2	EHMT2	ERGOCORNINE		DTC
EHMT2	EHMT2	CHEMBL1537417		DTC
EHMT2	EHMT2	1-AMINOCYCLOPROPANE CARBOXYLIC ACID		DTC
EHMT2	EHMT2	CHEMBL227959		DTC
EHMT2	EHMT2	CHEMBL472940		DTC
EHMT2	EHMT2	CHEMBL585240		DTC
EHMT2	EHMT2	DAUNORUBICIN HYDROCHLORIDE		DTC
EHMT2	EHMT2	ALTENUSIN		DTC
EHMT2	EHMT2	OXYPHENBUTAZONE		DTC
EHMT2	EHMT2	CEPHALEXIN		DTC
EHMT2	EHMT2	CHEMBL585628		DTC
EHMT2	EHMT2	DEBRISOQUIN SULFATE		DTC
EHMT2	EHMT2	CEFAZOLIN		DTC
EHMT2	EHMT2	CHEMBL1256186		DTC
EHMT2	EHMT2	CHEMBL586029		DTC
EHMT2	EHMT2	CHEMBL1312050		DTC
EHMT2	EHMT2	SULINDAC		DTC
EHMT2	EHMT2	CYSTAMINE DIHYDROCHLORIDE		DTC
EHMT2	EHMT2	AZEPEXOLE		DTC
EHMT2	EHMT2	TELMISARTAN		DTC
EHMT2	EHMT2	CHAETOCIN		DTC
EHMT2	EHMT2	IMIDAZOLE ACETIC ACID		DTC
EHMT2	EHMT2	PAXILLINE		DTC
EHMT2	EHMT2	CHLOROQUINE		DTC
EHMT2	EHMT2	LANSOPRAZOLE		DTC
EHMT2	EHMT2	LOMEFLOXACIN		DTC
EHMT2	EHMT2	PHENELZINE		DTC
EHMT2	EHMT2	FUSARIC ACID		DTC
EHMT2	EHMT2	ETHACRYNIC ACID		DTC
EHMT2	EHMT2	ETAZOLATE		DTC
EHMT2	EHMT2	CGP-12177		DTC
EHMT2	EHMT2	CHEMBL1256689		DTC
EHMT2	EHMT2	SULINDAC SULFOXIDE		DTC
EHMT2	EHMT2	CHEMBL154580		DTC
EHMT2	EHMT2	CHEMBL282199		DTC
EHMT2	EHMT2	ETHAMSYLATE		DTC
EHMT2	EHMT2	THIETHYLPERAZINE MALATE		DTC
EHMT2	EHMT2	TRICHOSTATIN		DTC
EHMT2	EHMT2	NICARDIPINE HYDROCHLORIDE		DTC
EHMT2	EHMT2	CHEMBL530280		DTC
EHMT2	EHMT2	CHEMBL234338		DTC
EHMT2	EHMT2	PYRROLIDINE DITHIOCARBAMATE		DTC
EHMT2	EHMT2	ENCLOMIPHENE CITRATE		DTC
EHMT2	EHMT2	CHLORHEXIDINE		DTC
EHMT2	EHMT2	PERAZINE		DTC
EHMT2	EHMT2	DIPYRIDAMOLE		DTC
EHMT2	EHMT2	GOSSYPOL		DTC
EHMT2	EHMT2	BUTHIONINE SULFOXIMINE		DTC
EHMT2	EHMT2	CHEMBL198666		DTC
EHMT2	EHMT2	GUAIAZULEN		DTC
EHMT2	EHMT2	NICARDIPINE		DTC
EHMT2	EHMT2	CHEMBL576781		DTC	19891491
EHMT2	EHMT2	NOLATREXED		DTC
EHMT2	EHMT2	4-BENZYLOXYANILINE		DTC
EHMT2	EHMT2	CHEMBL586195		DTC
EHMT2	EHMT2	CHEMBL538542		DTC
EHMT2	EHMT2	CHEMBL1331995		DTC
EHMT2	EHMT2	TYRPHOSTIN AG 879		DTC
EHMT2	EHMT2	CHEMBL458328		DTC
EHMT2	EHMT2	HINOKITIOL		DTC
EHMT2	EHMT2	CARBETAPENTANE		DTC
EHMT2	EHMT2	FOMEPIZOLE		DTC
EHMT2	EHMT2	ELLIPTECINE		DTC
EHMT2	EHMT2	DANTHRON		DTC
EHMT2	EHMT2	FIDUXOSIN HYDROCHLORIDE		DTC
EHMT2	EHMT2	CYSTEAMINE HYDROCHLORIDE		DTC
EHMT2	EHMT2	CIANIDANOL		DTC
EHMT2	EHMT2	CHEMBL578675		DTC
EHMT2	EHMT2	CHEMBL193093		DTC
EHMT2	EHMT2	ZIPRASIDONE		DTC
EHMT2	EHMT2	CHEMBL211670		DTC
EHMT2	EHMT2	CHEMBL601547		DTC
EHMT2	EHMT2	CHEMBL1448793		DTC
EHMT2	EHMT2	CHEMBL530664		DTC
EHMT2	EHMT2	CHEMBL67535		DTC
EHMT2	EHMT2	CHEMBL600173		DTC
EHMT2	EHMT2	QUINOLINIC ACID		DTC
EHMT2	EHMT2	DIMERCAPROL		DTC
EHMT2	EHMT2	AMARANTH		DTC
EHMT2	EHMT2	CITALOPRAM		DTC
EHMT2	EHMT2	HYDRALAZINE		DTC
EHMT2	EHMT2	CHEMBL17329		DTC
EHMT2	EHMT2	PROROXAN HYDROCHLORIDE		DTC
EHMT2	EHMT2	CHEMBL56543		DTC
EHMT2	EHMT2	PHENANTHROLINE		DTC
EHMT2	EHMT2	CHEMBL139935		DTC
EHMT2	EHMT2	HARMOL		DTC
EHMT2	EHMT2	LEVONORDEFRIN		DTC
EHMT2	EHMT2	THIORIDAZINE		DTC
EHMT2	EHMT2	LISINOPRIL HYDRATE		DTC
EHMT2	EHMT2	CHEMBL68534		DTC
EHMT2	EHMT2	CHEMBL116548		DTC
EHMT2	EHMT2	PHENOTHIAZINE		DTC
EHMT2	EHMT2	ENOXIMONE		DTC
EHMT2	EHMT2	PHENSERINE		DTC
EHMT2	EHMT2	CHEMBL466465		DTC
EHMT2	EHMT2	CHEMBL2374078		DTC
EHMT2	EHMT2	CISPLATIN		DTC
EHMT2	EHMT2	CHEMBL59030		DTC
EHMT2	EHMT2	CHEMBL586031		DTC
EHMT2	EHMT2	CHEMBL56542		DTC
EHMT2	EHMT2	DACTINOMYCIN		DTC
EHMT2	EHMT2	NALOXONE HYDROCHLORIDE		DTC
EHMT2	EHMT2	ERBSTATIN		DTC
EHMT2	EHMT2	TOLAZAMIDE		DTC
EHMT2	EHMT2	THIRAM		DTC
EHMT2	EHMT2	CHEMBL580851		DTC
EHMT2	EHMT2	CHEMBL1256698		DTC
EHMT2	EHMT2	CHEMBL77387		DTC
EHMT2	EHMT2	CHEMBL601952		DTC
EHMT2	EHMT2	CHEMBL1504679		DTC
EHMT2	EHMT2	CHEMBL127421		DTC
EHMT2	EHMT2	ARACHIDONOYL GLYCINE		DTC
EHMT2	EHMT2	CHEMBL476025		DTC
EHMT2	EHMT2	CHEMBL582764		DTC
EHMT2	EHMT2	RUFLOXACIN		DTC
EHMT2	EHMT2	CHEMBL585269		DTC
EHMT2	EHMT2	CHEMBL1465049		DTC
EHMT2	EHMT2	CEFOTIAM HYDROCHLORIDE		DTC
EHMT2	EHMT2	DICYCLOMINE		DTC
EHMT2	EHMT2	CHEMBL553503		DTC
EHMT2	EHMT2	CHELERYTHRINE		DTC
EHMT2	EHMT2	EMODIN		DTC
EHMT2	EHMT2	CHEMBL1306524		DTC
EHMT2	EHMT2	2-MERCAPTOBENZIMIDAZOLE		DTC
EHMT2	EHMT2	CHEMBL589670		DTC
EHMT2	EHMT2	CHEMBL578257		DTC
EHMT2	EHMT2	CARBOXYMETHOXYLAMINE		DTC
EHMT2	EHMT2	CHEMBL606456		DTC
EHMT2	EHMT2	CHEMBL258756		DTC
EHMT2	EHMT2	ACETYLSEROTONIN		DTC
EHMT2	EHMT2	E-64C		DTC
EHMT2	EHMT2	CHEMBL428789		DTC
EHMT2	EHMT2	NIALAMIDE		DTC
EHMT2	EHMT2	CHEMBL602990		DTC
EHMT2	EHMT2	2-METHOXYESTRADIOL		DTC
EHMT2	EHMT2	3,5-DINITROCATECHOL (OR-486)		DTC
EHMT2	EHMT2	CHEMBL189753		DTC
EHMT2	EHMT2	NORDIHYDROGUAIARETIC ACID		DTC
EHMT2	EHMT2	COCLAURINE		DTC
EHMT2	EHMT2	CHEMBL429095		DTC
EHMT2	EHMT2	AP-7		DTC
EHMT2	EHMT2	CHEMBL584248		DTC
EHMT2	EHMT2	N-ETHYLMALEIMIDE		DTC
EHMT2	EHMT2	CHEMBL317356		DTC
EHMT2	EHMT2	THIOTEPA		DTC
EHMT2	EHMT2	DIOTYROSINE		DTC
EHMT2	EHMT2	BUFEXAMAC		DTC
EHMT2	EHMT2	CEFACLOR		DTC
EHMT2	EHMT2	CHELERYTHRINE CHLORIDE		DTC
EHMT2	EHMT2	FOSFONET		DTC
EHMT2	EHMT2	2-MERCAPTOBENZOTHIAZOLE		DTC
EHMT2	EHMT2	CHEMBL602763		DTC
EHMT2	EHMT2	MIZORIBINE		DTC
EHMT2	EHMT2	CHEMBL493863		DTC
EHMT2	EHMT2	THIOPROPERAZINE MESYLATE		DTC
EHMT2	EHMT2	CHEMBL578741		DTC
EHMT2	EHMT2	MUSCARINE		DTC
EHMT2	EHMT2	CHEMBL601744		DTC
EHMT2	EHMT2	CHEMBL1079460		DTC
EHMT2	EHMT2	CHEMBL140020		DTC
EHMT2	EHMT2	METHIMAZOLE		DTC
EHMT2	EHMT2	HYPOTAURINE		DTC
EHMT2	EHMT2	BENZOPHENONE-THIOSEMICARBAZONE		DTC
EHMT2	EHMT2	FLUPHENAZINE		DTC
EHMT2	EHMT2	CHEMBL388979		DTC
EHMT2	EHMT2	CHEMBL529361		DTC
EHMT2	EHMT2	CHEMBL1459149		DTC
EHMT2	EHMT2	CHEMBL1256984		DTC
EHMT2	EHMT2	PROCHLORPERAZINE EDISYLATE		DTC
EHMT2	EHMT2	HOMIDIUM		DTC
EHMT2	EHMT2	CHEMBL545184		DTC
EHMT2	EHMT2	PUTRESCINE DIHYDROCHLORIDE		DTC
EHMT2	EHMT2	GUANIDINONALTRINDOLE		DTC
EHMT2	EHMT2	EFLORNITHINE		DTC
EHMT2	EHMT2	CHEMBL601137		DTC
EHMT2	EHMT2	QUERCETIN		DTC
EHMT2	EHMT2	THYMOL IODIDE		DTC
EHMT2	EHMT2	CHEMBL35354		DTC
EHMT2	EHMT2	CHEMBL600701		DTC
EHMT2	EHMT2	PROMAZINE HYDROCHLORIDE		DTC
EHMT2	EHMT2	NAFTOPIDIL		DTC
EHMT2	EHMT2	LINOLENIC ACID		DTC
EHMT2	EHMT2	EBSELEN		DTC
EHMT2	EHMT2	CHEMBL297784		DTC
EHMT2	EHMT2	DIBROMOTYROSINE		DTC
EHMT2	EHMT2	CHEMBL166486		DTC
EHMT2	EHMT2	CHEMBL1368696		DTC
EHMT2	EHMT2	APOCIDEINE		DTC
EHMT2	EHMT2	CHEMBL1256813		DTC
EHMT2	EHMT2	CHEMBL475813		DTC
EHMT2	EHMT2	ISOETHARINE MESYLATE		DTC
EHMT2	EHMT2	HISTAMINE		DTC
EHMT2	EHMT2	BENZYL NICOTINATE		DTC
EHMT2	EHMT2	GANAXOLONE		DTC
EHMT2	EHMT2	CHEMBL589421		DTC
EHMT2	EHMT2	CHEMBL1172228		DTC
EHMT2	EHMT2	3,4-DIHYDROXYPHENYLACETIC ACID		DTC
EHMT2	EHMT2	CHEMBL602969		DTC
EHMT2	EHMT2	CALCIMYCIN		DTC
EHMT2	EHMT2	CHEMBL1256678		DTC
EHMT2	EHMT2	IDAZOXAN HYDROCHLORIDE		DTC
EHMT2	EHMT2	MENADIONE		DTC
EHMT2	EHMT2	CEPHALOTHIN		DTC
EHMT2	EHMT2	CHEMBL1307453		DTC
EHMT2	EHMT2	CEFOTETAN		DTC
EHMT2	EHMT2	E324		DTC
EHMT2	EHMT2	LEVODOPA		DTC
EHMT2	EHMT2	DOPAMINE HYDROCHLORIDE		DTC
EHMT2	EHMT2	CAPSAZEPINE		DTC
EHMT2	EHMT2	CHEMBL1256920		DTC
EHMT2	EHMT2	INDOCATE		DTC
EHMT2	EHMT2	CHEMBL595227		DTC
EHMT2	EHMT2	MESORIDAZINE		DTC
EHMT2	EHMT2	DIHYDRALAZINE		DTC
EHMT2	EHMT2	CARBIDOPA		DTC
EHMT2	EHMT2	DIPHOSPHOMETHYLPHOSPHONIC ACID ADENOSYL ESTER		DTC
EHMT2	EHMT2	HYPERICIN		DTC
EHMT2	EHMT2	DAUNORUBICIN		DTC
EHMT2	EHMT2	CONGO RED		DTC
EHMT2	EHMT2	PIRENZEPINE		DTC
EHMT2	EHMT2	CHEMBL605959		DTC
EHMT2	EHMT2	CHEMBL431504		DTC
EHMT2	EHMT2	CORYNANTHEINE		DTC
EHMT2	EHMT2	SANGUINARIUM		DTC
EHMT2	EHMT2	ISOQUERCETIN		DTC
EHMT2	EHMT2	TRIPROLIDINE		DTC
EHMT2	EHMT2	URAPIDIL		DTC
EHMT2	EHMT2	PHENYLBUTAZONE		DTC
EHMT2	EHMT2	RESVERATROL		DTC
EHMT2	EHMT2	VINPOCETINE		DTC
EHMT2	EHMT2	CHEMBL295212		DTC
EHMT2	EHMT2	SEROTONIN HYDROCHLORIDE		DTC
EHMT2	EHMT2	CLOFAZIMINE		DTC
EHMT2	EHMT2	CHEMBL1426508		DTC
EHMT2	EHMT2	CHEMBL590691		DTC
EHMT2	EHMT2	CHEMBL421215		DTC
EHMT2	EHMT2	DILTIAZEM HYDROCHLORIDE		DTC
EHMT2	EHMT2	AMSACRINE HYDROCHLORIDE		DTC
EHMT2	EHMT2	BROMOCRIPTINE MESYLATE		DTC
EHMT2	EHMT2	CHEMBL1383812		DTC
EHMT2	EHMT2	CHEMBL591404		DTC
EHMT2	EHMT2	ACETAMIDE		DTC
EHMT2	EHMT2	PROTOAPIGENONE		DTC
EHMT2	EHMT2	CHEMBL547833		DTC
EHMT2	EHMT2	CHEMBL457504		DTC
EHMT2	EHMT2	CHEMBL590672		DTC
EHMT2	EHMT2	CHEMBL1449731		DTC
EHMT2	EHMT2	CHEMBL258767		DTC
EHMT2	EHMT2	CHEMBL492528		DTC
EHMT2	EHMT2	LINSIDOMINE		DTC
EHMT2	EHMT2	CYCLOPHOSPHAMIDE		DTC
EHMT2	EHMT2	DECYLUBIQUINONE		DTC
EHMT2	EHMT2	PYRAZINOIC ACID		DTC
EHMT2	EHMT2	L-MIMOSINE		DTC
EHMT2	EHMT2	AMANTADINE HYDROCHLORIDE		DTC
EHMT2	EHMT2	SYMCLOSENE		DTC
EHMT2	EHMT2	CHEMBL541585		DTC
EHMT2	EHMT2	CYCLOPIAZONIC ACID		DTC
EHMT2	EHMT2	CAPTOPRIL		DTC
EHMT2	EHMT2	CHEMBL587856		DTC
EHMT2	EHMT2	SERTACONAZOLE NITRATE		DTC
EHMT2	EHMT2	PAROXETINE		DTC
EHMT2	EHMT2	BETAINE HYDROCHLORIDE		DTC
EHMT2	EHMT2	CHEMBL343002		DTC
EHMT2	EHMT2	ZAPRINAST		DTC
EHMT2	EHMT2	0-HEXYL-1,3-DIAMINE-PLATINUM 2,2-DICHLORIDE		DTC
EHMT2	EHMT2	CHEMBL582697		DTC
EHMT2	EHMT2	BENSERAZIDE HYDROCHLORIDE		DTC
EHMT2	EHMT2	CHELIDAMIC ACID		DTC
EHMT2	EHMT2	GALLIC ACID METHYL ESTER		DTC
EHMT2	EHMT2	TRIFLUOPERAZINE		DTC
EHMT2	EHMT2	CYTARABINE		DTC
EHMT2	EHMT2	CHEMBL1814509		DTC
EHMT2	EHMT2	CHEMBL533602		DTC
EHMT2	EHMT2	PYRONIN Y		DTC
EHMT2	EHMT2	MOLINDONE		DTC
EHMT2	EHMT2	CHEMBL601385		DTC
EHMT2	EHMT2	PROFLAVINE		DTC
EHMT2	EHMT2	CHEMBL403183		DTC
EHMT2	EHMT2	CHEMBL321585		DTC
EHMT2	EHMT2	SCARLET RED		DTC
EHMT2	EHMT2	TREQUINSIN		DTC
EHMT2	EHMT2	BROMOCRIPTINE		DTC
EHMT2	EHMT2	CHEMBL411085		DTC
EHMT2	EHMT2	LYCOPENE		DTC
EHMT2	EHMT2	(S)-WILLARDIINE		DTC
EHMT2	EHMT2	IMETIT DIHYDROBROMIDE		DTC
EHMT2	EHMT2	CHEMBL275311		DTC
EHMT2	EHMT2	CLOSANTEL		DTC
EHMT2	EHMT2	SANGUINARIUM CHLORIDE		DTC
EHMT2	EHMT2	CHEMBL583558		DTC
EHMT2	EHMT2	SALICYLHYDROXAMIC ACID		DTC
EHMT2	EHMT2	VANITIOLIDE		DTC
EHMT2	EHMT2	METHYLDOPA (RACEMIC)		DTC
EHMT2	EHMT2	DOPAMINE		DTC
EHMT2	EHMT2	CHEMBL596631		DTC
EHMT2	EHMT2	CHEMBL590168		DTC
EHMT2	EHMT2	CANAVANINE		DTC
EHMT2	EHMT2	CHEMBL1442783		DTC
EHMT2	EHMT2	IODOFORM		DTC
EHMT2	EHMT2	CARNOSIC ACID		DTC
EHMT2	EHMT2	MG-132		DTC
EHMT2	EHMT2	GR-55562		DTC
EHMT2	EHMT2	NISOLDIPINE		DTC
EHMT2	EHMT2	CHEMBL578512		DTC
EHMT2	EHMT2	CHEMBL582737		DTC
EHMT2	EHMT2	CHEMBL605003		DTC
EHMT2	EHMT2	THEOPHYLLINE		DTC
EHMT2	EHMT2	OXYTETRACYCLINE		DTC
EHMT2	EHMT2	CHEMBL600298		DTC
EHMT2	EHMT2	DIMETHYLPHENYLPIPERAZINIUM IODIDE		DTC
EHMT2	EHMT2	ISOCONAZOLE		DTC
EHMT2	EHMT2	AMSACRINE		DTC
EHMT2	EHMT2	FENCLONINE		DTC
EHMT2	EHMT2	DEXTROMEPROMAZINE		DTC
EHMT2	EHMT2	CHEMBL584452		DTC
EHMT2	EHMT2	RISEDRONIC ACID		DTC
EHMT2	EHMT2	2-PICOLINIC ACID		DTC
EHMT2	EHMT2	RABEPRAZOLE		DTC
EHMT2	EHMT2	CHEMBL1534034		DTC
EHMT2	EHMT2	IMIPRAMINE		DTC
EHMT2	EHMT2	CARUBICIN		DTC
EHMT2	EHMT2	DISULFIRAM		DTC
EHMT2	EHMT2	CHEMBL589245		DTC
EHMT2	EHMT2	CHEMBL1489812		DTC
EHMT2	EHMT2	TYRPHOSTIN A9		DTC
EHMT2	EHMT2	PROMETHAZINE HYDROCHLORIDE		DTC
EHMT2	EHMT2	DITHIAZANINE IODIDE		DTC
EHMT2	EHMT2	HARPAGOSIDE		DTC
EHMT2	EHMT2	GF-109203		DTC
EHMT2	EHMT2	CHEMBL451722		DTC
EHMT2	EHMT2	CHEMBL80155		DTC
EHMT2	EHMT2	PHENELZINE SULFATE		DTC
EHMT2	EHMT2	INDIRUBIN-3-MONOXIME		DTC
EHMT2	EHMT2	(-)-U-50488		DTC
EHMT2	EHMT2	GW7647		DTC
EHMT2	EHMT2	FLUPIRTINE MALEATE		DTC
EHMT2	EHMT2	ETHOPROPAZINE		DTC
EHMT2	EHMT2	CHEMBL599098		DTC
EHMT2	EHMT2	CGS-15943		DTC
EHMT2	EHMT2	PYROGALLOL		DTC
EHMT2	EHMT2	CYCLIC ADENOSINE MONOPHOSPHATE		DTC
EHMT2	EHMT2	FLUPHENAZINE HYDROCHLORIDE		DTC
EHMT2	EHMT2	CHEMBL603739		DTC
EHMT2	EHMT2	CHEMBL118378		DTC
EHMT2	EHMT2	APOMORPHINE		DTC
EHMT2	EHMT2	N,N-HEXAMETHYLENEAMILORIDE		DTC
EHMT2	EHMT2	PD-169316		DTC
EHMT2	EHMT2	CHEMBL581251		DTC
EHMT2	EHMT2	CHEMBL599013		DTC
EHMT2	EHMT2	CHEMBL299853		DTC
EHMT2	EHMT2	IPRONIAZID PHOSPHATE		DTC
EHMT2	EHMT2	ISOETHARINE		DTC
EHMT2	EHMT2	NICOTINE BITARTRATE		DTC
EHMT2	EHMT2	MAPROTILINE HYDROCHLORIDE		DTC
EHMT2	EHMT2	CEFAMANDOLE SODIUM		DTC
EHMT2	EHMT2	SALUBRINAL		DTC
EHMT2	EHMT2	BUSPIRONE		DTC
EHMT2	EHMT2	NIMUSTINE		DTC
EHMT2	EHMT2	CHEMBL582287		DTC
EHMT2	EHMT2	CHEMBL600747		DTC
EHMT2	EHMT2	GLUTAMIC ACID HYDROCHLORIDE		DTC
EHMT2	EHMT2	HEMICHOLINIUM-3		DTC
EHMT2	EHMT2	CHEMBL1567571		DTC
EHMT2	EHMT2	TOLFENAMIC ACID		DTC
EHMT2	EHMT2	CHEMBL1510164		DTC
EHMT2	EHMT2	SEROTONIN		DTC
EHMT2	EHMT2	CHEMBL532412		DTC
EHMT2	EHMT2	CHEMBL1308346		DTC
EHMT2	EHMT2	CHEMBL589711		DTC
EHMT2	EHMT2	GLUTAMIC ACID		DTC
EHMT2	EHMT2	CHEMBL600738		DTC
EHMT2	EHMT2	CHEMBL533954		DTC
EHMT2	EHMT2	CHEMBL1369632		DTC
EHMT2	EHMT2	CHEMBL580183		DTC
EHMT2	EHMT2	SURAMIN		DTC
EHMT2	EHMT2	CHEMBL53898		DTC
EHMT2	EHMT2	DIHYDROXIDINE		DTC
EHMT2	EHMT2	CHEMBL1236602		DTC
EHMT2	EHMT2	CARMINE		DTC
EHMT2	EHMT2	CHEMBL600769		DTC
EHMT2	EHMT2	NOREPINEPHRINE		DTC
EHMT2	EHMT2	DEOXIEPINEPHRINE		DTC
EHMT2	EHMT2	1,2-NAPHTHOQUINONE		DTC
EHMT2	EHMT2	CHEMBL530698		DTC
EHMT2	EHMT2	TRIMETREXATE		DTC
EHMT2	EHMT2	CHEMBL1483413		DTC
EHMT2	EHMT2	AMILORIDE		DTC
EHMT2	EHMT2	SULFADIAZINE, SILVER		DTC
EHMT2	EHMT2	KENPAULLONE		DTC
EHMT2	EHMT2	OXYMETHOLONE		DTC
EHMT2	EHMT2	OMEPRAZOLE MAGNESIUM		DTC
EHMT2	EHMT2	CHEMBL591137		DTC
EHMT2	EHMT2	CHEMBL1310701		DTC
EHMT2	EHMT2	CHEMBL344127		DTC
EHMT2	EHMT2	RAZOXANE		DTC
EHMT2	EHMT2	CHEMBL602206		DTC
EHMT2	EHMT2	CHEMBL586937		DTC
EHMT2	EHMT2	CHEMBL576353		DTC
EHMT2	EHMT2	TYRPHOSTIN 51		DTC
EHMT2	EHMT2	MELPHALAN		DTC
EHMT2	EHMT2	CHEMBL582694		DTC
EHMT2	EHMT2	CHEMBL547175		DTC
EHMT2	EHMT2	METHAZOLAMIDE		DTC
EHMT2	EHMT2	CHEMBL1451216		DTC
EHMT2	EHMT2	WIN-552122		DTC
EHMT2	EHMT2	CHEMBL26320		DTC
EHMT2	EHMT2	4-CHLOROMERCURIBENZOIC ACID		DTC
EHMT2	EHMT2	XANTHINE AMINE CONGENER		DTC
EHMT2	EHMT2	CHEMBL590706		DTC
EHMT2	EHMT2	CEPHAPIRIN SODIUM		DTC
EHMT2	EHMT2	BRONOPOL		DTC
EHMT2	EHMT2	CHEMBL536166		DTC
EHMT2	EHMT2	SILIBININ		DTC
EHMT2	EHMT2	HARMINE HYDROCHLORIDE		DTC
EHMT2	EHMT2	CHEMBL596380		DTC
EHMT2	EHMT2	CHEMBL1328677		DTC
EHMT2	EHMT2	THIOSALICYLIC ACID		DTC
EHMT2	EHMT2	ISOPROTERENOL		DTC
EHMT2	EHMT2	CHEMBL1605629		DTC
EHMT2	EHMT2	TREQUINSIN HYDROCHLORIDE		DTC
EHMT2	EHMT2	CHEMBL1256174		DTC
EHMT2	EHMT2	CHEMBL2094456		DTC
EHMT2	EHMT2	CHEMBL525106		DTC
EHMT2	EHMT2	INDOLE-3-CARBINOL		DTC
EHMT2	EHMT2	TANNIC ACID		DTC
EHMT2	EHMT2	CHEMBL538798		DTC
EHMT2	EHMT2	CHEMBL1412002		DTC
EHMT2	EHMT2	CHEMBL546580		DTC
EHMT2	EHMT2	SALMETEROL XINAFOATE		DTC
EHMT2	EHMT2	METRAZOLINE OXALATE		DTC
EHMT2	EHMT2	CHEMBL547304		DTC
EHMT2	EHMT2	(-)-EPICATECHIN		DTC
EHMT2	EHMT2	CHEMBL531322		DTC
EHMT2	EHMT2	TANSHINONE IIA		DTC
EHMT2	EHMT2	LAPACHONE		DTC
EHMT2	EHMT2	THIORIDAZINE HYDROCHLORIDE		DTC
EHMT2	EHMT2	NIFEDIPINE		DTC
EHMT2	EHMT2	LIPOIC ACID, ALPHA		DTC
EHMT2	EHMT2	CEPHARANTHINE		DTC
EHMT2	EHMT2	DIPYRIDYL		DTC
EHMT2	EHMT2	CHEMBL592588		DTC
EHMT2	EHMT2	CHEMBL582722		DTC
EHMT2	EHMT2	CHEMBL584635		DTC
EHMT2	EHMT2	PYRAZOPHOS		DTC
EHMT2	EHMT2	BEPRIDIL		DTC
EHMT2	EHMT2	ORPHENADRINE CITRATE		DTC
EHMT2	EHMT2	CHEMBL598663		DTC
EHMT2	EHMT2	CHEMBL609606		DTC
EHMT2	EHMT2	INDIGO		DTC
EHMT2	EHMT2	STREPTOMYCIN		DTC
EHMT2	EHMT2	MITOXANTRONE		DTC
EHMT2	EHMT2	ICRF-193		DTC
EHMT2	EHMT2	NIMESULIDE		DTC
EHMT2	EHMT2	TRITIOZINE		DTC
EHMT2	EHMT2	NALOXONE METHIODIDE		DTC
EHMT2	EHMT2	CHEMBL467987		DTC
EHMT2	EHMT2	SR-2640		DTC
EHMT2	EHMT2	CLORINDIONE		DTC
EHMT2	EHMT2	QUINACRINE DIHYDROCHLORIDE		DTC
EHMT2	EHMT2	NORBINALTORPHIMINE		DTC
EHMT2	EHMT2	CHEMBL591630		DTC
EHMT2	EHMT2	HISTIDINE		DTC
EHMT2	EHMT2	CHEMBL1315166		DTC
EHMT2	EHMT2	CHEMBL72365		DTC
EHMT2	EHMT2	CAFFEIC ACID PHENETHYL ESTER		DTC
EHMT2	EHMT2	THIOTHIXENE HYDROCHLORIDE		DTC
EHMT2	EHMT2	DAPH		DTC
EHMT2	EHMT2	CYCLOVALONE		DTC
EHMT2	EHMT2	CHEMBL43078		DTC
EHMT2	EHMT2	CHEMBL609036		DTC
EHMT2	EHMT2	LUTEOLIN		DTC
EHMT2	EHMT2	CITICOLINE SODIUM		DTC
EHMT2	EHMT2	NALOXONE BENZOYLHYDRAZONE		DTC
EHMT2	EHMT2	CHEMBL601605		DTC
EHMT2	EHMT2	SOBUZOXANE		DTC
EHMT2	EHMT2	FENAMIC ACID		DTC
EHMT2	EHMT2	SPERMINE		DTC
EHMT2	EHMT2	ARACHIDONIC ACID		DTC
EHMT2	EHMT2	SULFINPYRAZONE		DTC
EHMT2	EHMT2	OSAJIN		DTC
EHMT2	EHMT2	CALMIDAZOLIUM CHLORIDE		DTC
EHMT2	EHMT2	CHEMBL589924		DTC
EHMT2	EHMT2	LOMOFUNGIN		DTC
EHMT2	EHMT2	PYRITHIONE ZINC		DTC
EHMT2	EHMT2	CHEMBL601968		DTC
ELANE	ELANE	SIVELESTAT	inhibitor	DTC,TdgClinicalTrial,GuideToPharmacology,TTD	23350733
ELANE	ELANE	ALVELESTAT	inhibitor	GuideToPharmacology
ELANE	ELANE	NIFEDIPINE		NCI	97967818833599
ELANE	ELANE	ERDOSTEINE		TdgClinicalTrial
ELANE	ELANE	DEPELESTAT		TTD
ELANE	ELANE	CHEMBL310871		DTC	17535802
ELANE	ELANE	NICOTINE		NCI	8912774
ELANE	ELANE	SYMPLOSTATIN 5		DTC	23350733
ELANE	ELANE	TIPRELESTAT		TTD
ERAP1	ERAP1	TOSEDOSTAT	inhibitor	ChemblInteractions
ERAP1	ERAP1	CHEMBL531269		DTC
ERAP1	ERAP1	UMBELLIFERONE		DTC
ERAP1	ERAP1	ESCULETIN		DTC
ERAP1	ERAP1	CHEMBL587247		DTC
ERAP1	ERAP1	SCOPOLETIN		DTC
ERAP2	ERAP2	TOSEDOSTAT	inhibitor	ChemblInteractions
ERAP2	ERAP2	ESCULETIN		DTC
ERAP2	ERAP2	SCOPOLETIN		DTC
ERBB2	ERBB2	OSIMERTINIB MESYLATE	inhibitor	ChemblInteractions
ERBB2	ERBB2	AC-480	inhibitor	TALC,DTC,MyCancerGenome,TdgClinicalTrial,JAX-CKB,ChemblInteractions,GuideToPharmacology,TTD	1982156221576280
ERBB2	ERBB2	PERTUZUMAB	antibody,inhibitor	TALC,ClearityFoundationBiomarkers,MyCancerGenome,TdgClinicalTrial,JAX-CKB,ChemblInteractions,CGI,CIViC,GuideToPharmacology,PharmGKB,TTD,FDA,OncoKB	3.14534e+87
ERBB2	ERBB2	MUBRITINIB	inhibitor	MyCancerGenome,ChemblInteractions,GuideToPharmacology
ERBB2	ERBB2	BMS-690514	inhibitor	TALC,MyCancerGenome,JAX-CKB,ChemblInteractions,GuideToPharmacology	21531814
ERBB2	ERBB2	HEMAY-022	inhibitor	ChemblInteractions
ERBB2	ERBB2	TRASTUZUMAB	inhibitor,antibody	TALC,ClearityFoundationBiomarkers,MyCancerGenome,TdgClinicalTrial,ClearityFoundationClinicalTrial,JAX-CKB,ChemblInteractions,NCI,CGI,DoCM,CIViC,GuideToPharmacology,PharmGKB,TTD,FDA,OncoKB	27900589,26619011,20504363,16091755,31453370,17936563,22257673,19840887,2013,21676217,26759238,30452336,26598547,24470511,28784859,27140927,11248153,27108243,22908275,21107682,18555254,26880266,15236790,26296355,22149875,23801166,29523624,26469692,26874901,22850551,24691421,25601188,24606768,24982373,26104654,17660958,20728210,11098307,20975068,17679724,27626067,23948973,26099744,28167203,3085795…
ERBB2	ERBB2	CUDC-101	inhibitor	TALC,TdgClinicalTrial,JAX-CKB,ChemblInteractions,GuideToPharmacology,TTD	25107918
ERBB2	ERBB2	SAPITINIB	inhibitor	TALC,MyCancerGenome,JAX-CKB,ChemblInteractions,GuideToPharmacology,TTD	24886365
ERBB2	ERBB2	CANERTINIB	inhibitor	MyCancerGenome,JAX-CKB,GuideToPharmacology,TTD	16843263
ERBB2	ERBB2	AFATINIB	inhibitor	TALC,MyCancerGenome,TdgClinicalTrial,JAX-CKB,CGI,CIViC,GuideToPharmacology,MyCancerGenomeClinicalTrial	1.91221e+191
ERBB2	ERBB2	POZIOTINIB	inhibitor	JAX-CKB,ChemblInteractions,GuideToPharmacology,MyCancerGenomeClinicalTrial	21306821
ERBB2	ERBB2	S-222611	inhibitor	JAX-CKB,ChemblInteractions,TTD	2483729925434920
ERBB2	ERBB2	DACOMITINIB	inhibitor	TALC,MyCancerGenome,TdgClinicalTrial,JAX-CKB,ChemblInteractions,CGI,CIViC,GuideToPharmacology,MyCancerGenomeClinicalTrial,TTD	2.21352e+39
ERBB2	ERBB2	ALLITINIB	inhibitor	ChemblInteractions,GuideToPharmacology
ERBB2	ERBB2	LAPATINIB	inhibitor,antagonist	TALC,DTC,ClearityFoundationBiomarkers,MyCancerGenome,TdgClinicalTrial,JAX-CKB,CGI,TEND,DoCM,CIViC,GuideToPharmacology,PharmGKB,TTD,FDA,OncoKB	26619011,25305330,17192538,20179222,16091755,27595477,12214266,24516025,22257673,20110044,18413839,27197158,27140927,15374980,26270481,27108243,22908275,24971884,14633707,22586653,27760111,26296355,26570998,2015169,18774637,27450453,24355130,16894399,27900369,23948973,14751502,27026198,23940356,25398453,24868024,26245675,19786658,26811533,11752352,14737100,18803986,23122784,25157968,15163842,2204…
ERBB2	ERBB2	JNJ-26483327	inhibitor	ChemblInteractions,TTD
ERBB2	ERBB2	CP-724714	inhibitor	ChemblInteractions,GuideToPharmacology,TTD
ERBB2	ERBB2	LAPATINIB DITOSYLATE	inhibitor	ChemblInteractions
ERBB2	ERBB2	NERATINIB	inhibitor	TALC,MyCancerGenome,TdgClinicalTrial,JAX-CKB,ChemblInteractions,CGI,DoCM,CIViC,GuideToPharmacology,MyCancerGenomeClinicalTrial,PharmGKB,TTD,FDA,OncoKB	2.6619e+199
ERBB2	ERBB2	MM-111	antibody	MyCancerGenome,TdgClinicalTrial,JAX-CKB,GuideToPharmacology,TTD
ERBB2	ERBB2	TUCATINIB	inhibitor	TALC,TdgClinicalTrial,JAX-CKB,GuideToPharmacology,TTD	3.22419e+23
ERBB2	ERBB2	PELITINIB	inhibitor	TALC,MyCancerGenome
ERBB2	ERBB2	TESEVATINIB	inhibitor	TALC,MyCancerGenome,TdgClinicalTrial,JAX-CKB,ChemblInteractions,GuideToPharmacology	1841383919718020
ERBB2	ERBB2	TAK-285	inhibitor	JAX-CKB,ChemblInteractions,TTD	2.5594e+23
ERBB2	ERBB2	VARLITINIB	inhibitor	TdgClinicalTrial,JAX-CKB,ChemblInteractions,TTD
ERBB2	ERBB2	IBRUTINIB	inhibitor	JAX-CKB,CIViC,GuideToPharmacology	2725637828830910
ERBB2	ERBB2	ACALABRUTINIB	inhibitor	GuideToPharmacology
ERBB2	ERBB2	AEE-788	inhibitor	MyCancerGenome,JAX-CKB,ChemblInteractions,GuideToPharmacology	22046346
ERBB2	ERBB2	GEFITINIB	inhibitor	DTC,JAX-CKB,NCI,MyCancerGenomeClinicalTrial,PharmGKB	2.65459e+39
ERBB2	ERBB2	CANERTINIB DIHYDROCHLORIDE	inhibitor	ChemblInteractions
ERBB2	ERBB2	PYROTINIB	inhibitor	JAX-CKB,ChemblInteractions,GuideToPharmacology	28498781
ERBB2	ERBB2	AFATINIB DIMALEATE	inhibitor	ChemblInteractions
ERBB2	ERBB2	MP-412	inhibitor	TdgClinicalTrial,JAX-CKB,ChemblInteractions	1788803319459850
ERBB2	ERBB2	VANDETANIB	inhibitor	ChemblInteractions
ERBB2	ERBB2	MARGETUXIMAB	inhibitor,antibody	TdgClinicalTrial,JAX-CKB,ChemblInteractions,GuideToPharmacology,TTD	2811929522129100
ERBB2	ERBB2	TRASTUZUMAB EMTANSINE	inhibitor	ChemblInteractions
ERBB2	ERBB2	FALNIDAMOL	inhibitor	GuideToPharmacology
ERBB2	ERBB2	INSM-18	inhibitor	TdgClinicalTrial,ChemblInteractions
ERBB2	ERBB2	FLOXURIDINE		NCI	17177846
ERBB2	ERBB2	SIROLIMUS		CIViC	19122144
ERBB2	ERBB2	SOTRASTAURIN		DTC
ERBB2	ERBB2	ERLOTINIB		DTC,JAX-CKB,PharmGKB	27900369
ERBB2	ERBB2	ELGEMTUMAB		JAX-CKB	28539475
ERBB2	ERBB2	PONATINIB		JAX-CKB	26270481
ERBB2	ERBB2	METFORMIN		JAX-CKB	28375706
ERBB2	ERBB2	VINORELBINE		JAX-CKB	2799245124742730
ERBB2	ERBB2	DASATINIB		DTC
ERBB2	ERBB2	EMODIN		NCI	9671406
ERBB2	ERBB2	TALAZOPARIB		PharmGKB,FDA
ERBB2	ERBB2	BUPARLISIB		JAX-CKB	2.44705e+31
ERBB2	ERBB2	DIMETHYLCURCUMIN		DTC	25753330
ERBB2	ERBB2	PALBOCICLIB		JAX-CKB,CGI,PharmGKB,FDA	2.70209e+23
ERBB2	ERBB2	VISTUSERTIB		JAX-CKB	25805799
ERBB2	ERBB2	IXABEPILONE		PharmGKB,FDA
ERBB2	ERBB2	LAPULEUCEL-T		JAX-CKB
ERBB2	ERBB2	EVEROLIMUS		JAX-CKB,CGI,PharmGKB,FDA	2.11077e+23
ERBB2	ERBB2	IRINOTECAN		CIViC	25601188
ERBB2	ERBB2	ABEMACICLIB		CGI,PharmGKB,FDA
ERBB2	ERBB2	ROCILETINIB		CGI
ERBB2	ERBB2	CYCLOPHOSPHAMIDE		JAX-CKB
ERBB2	ERBB2	TRASTUZUMAB DUOCARMAZINE		JAX-CKB	2558949327256370
ERBB2	ERBB2	CENISERTIB		DTC
ERBB2	ERBB2	PA-799		JAX-CKB	21558396
ERBB2	ERBB2	GW843682X		DTC
ERBB2	ERBB2	PANITUMUMAB		JAX-CKB	26243863
ERBB2	ERBB2	SORAFENIB		JAX-CKB	27992451
ERBB2	ERBB2	SERIBANTUMAB		JAX-CKB
ERBB2	ERBB2	ZENOCUTUZUMAB		TTD
ERBB2	ERBB2	CRIZOTINIB		JAX-CKB,CGI	2759547726432100
ERBB2	ERBB2	EPIRUBICIN		NCI	11759828
ERBB2	ERBB2	AT-13148		JAX-CKB	22781553
ERBB2	ERBB2	MEDI-4276		TTD
ERBB2	ERBB2	CHEMBL35482		NCI	10318905
ERBB2	ERBB2	CAPECITABINE		JAX-CKB,CIViC	2.05044e+63
ERBB2	ERBB2	DEPATUXIZUMAB MAFODOTIN		JAX-CKB	26846818
ERBB2	ERBB2	TIPIRACIL		FDA
ERBB2	ERBB2	COPANLISIB		JAX-CKB	24170767
ERBB2	ERBB2	RIBOCICLIB		PharmGKB,FDA
ERBB2	ERBB2	TEMSIROLIMUS		JAX-CKB	24323026
ERBB2	ERBB2	ANASTROZOLE		CGI
ERBB2	ERBB2	CEDIRANIB		DTC
ERBB2	ERBB2	TRASTUZUMAB DERUXTECAN		JAX-CKB	27026201
ERBB2	ERBB2	ADO-TRASTUZUMAB EMTANSINE		TTD
ERBB2	ERBB2	OXALIPLATIN		JAX-CKB	2.87849e+23
ERBB2	ERBB2	TAE-684		DTC
ERBB2	ERBB2	PICTILISIB		JAX-CKB,CIViC	2702085722802530
ERBB2	ERBB2	CARBOPLATIN		CIViC,PharmGKB	3007103929584540
ERBB2	ERBB2	GANCOTAMAB		JAX-CKB,ChemblInteractions,TTD	26759238
ERBB2	ERBB2	LIFIRAFENIB		JAX-CKB	26208524
ERBB2	ERBB2	RG-4733		JAX-CKB	27556950
ERBB2	ERBB2	PLUMBAGIN		DTC	24355130
ERBB2	ERBB2	BEVACIZUMAB		JAX-CKB	2394035626432100
ERBB2	ERBB2	NAKIJIQUINONES H		DTC	18676149
ERBB2	ERBB2	ENTINOSTAT		JAX-CKB
ERBB2	ERBB2	MASOPROCOL		TTD
ERBB2	ERBB2	ERIBULIN		PharmGKB,FDA
ERBB2	ERBB2	DOCETAXEL		JAX-CKB,CIViC,PharmGKB	3.04523e+55
ERBB2	ERBB2	PACLITAXEL		JAX-CKB,CIViC	2.48864e+55
ERBB2	ERBB2	ALISERTIB		DTC
ERBB2	ERBB2	OSIMERTINIB		JAX-CKB,CGI	27252416
ERBB2	ERBB2	FIMEPINOSTAT		JAX-CKB	22693356
ERBB2	ERBB2	HERCEPTIN		NCI	1721600215581050
ERBB2	ERBB2	ERTUMAXOMAB		ChemblInteractions,TTD
ERBB2	ERBB2	DOXORUBICIN		JAX-CKB
ERBB2	ERBB2	CURCUMIN		DTC	25753330
ERBB2	ERBB2	T-DM1		JAX-CKB	27052654
ERBB2	ERBB2	MDX-210		ChemblInteractions
ERBB2	ERBB2	EPIGALOCATECHIN GALLATE		DTC	24456004
ERBB2	ERBB2	HYDROCORTISONE		NCI	7909787
ERBB2	ERBB2	NAKIJIQUINONE I		DTC	18676149
ERBB2	ERBB2	TASELISIB		JAX-CKB	2517276226333380
ERBB2	ERBB2	METHYLCURCUMIN		DTC	25753330
ERBB2	ERBB2	AZD-8055		JAX-CKB	25436981
ERBB2	ERBB2	PKI-179		JAX-CKB	20797855
ERBB2	ERBB2	IRESSA		NCI	16470840
ERBB2	ERBB2	TRODUSQUEMINE		JAX-CKB	24845231
ERBB2	ERBB2	FLUOROURACIL		JAX-CKB	2.87849e+23
ERBB2	ERBB2	LEUCOVORIN		JAX-CKB	2.87849e+23
ERBB2	ERBB2	IPATASERTIB		JAX-CKB	24141624
ERBB2	ERBB2	EXEMESTANE		JAX-CKB,CGI
ERBB2	ERBB2	CHLORAMBUCIL		NCI	11691913
ERBB2	ERBB2	ALPELISIB		PharmGKB,FDA
ERBB2	ERBB2	GO-6976		DTC
ERBB2	ERBB2	VS-5584		JAX-CKB	23270925
ERBB2	ERBB2	ILORASERTIB		DTC
ERBB2	ERBB2	ONARTUZUMAB		JAX-CKB	27918764
ERBB2	ERBB2	DIETHYLSTILBESTROL		NCI	14647453
ERBB2	ERBB2	TRIFLURIDINE		FDA
ERBB2	ERBB2	NAKIJIQUINONES G		DTC	18676149
ERBB2	ERBB2	LETROZOLE		JAX-CKB,CGI	19786658
ERBB2	ERBB2	MK-2206		JAX-CKB,CGI	2.01326e+23
ERBB2	ERBB2	RAMUCIRUMAB		JAX-CKB	25185099
ERBB2	ERBB2	PILARALISIB		JAX-CKB,CIViC	2394897323204220
ERBB2	ERBB2	GEDATOLISIB		JAX-CKB	1731427621325070
ERBB2	ERBB2	CI-1040		JAX-CKB	23948973
ERBB2	ERBB2	R-406		DTC
ERBB2	ERBB2	TAMOXIFEN		NCI,CGI	1.19162e+23
ERBB2	ERBB2	GANCICLOVIR		NCI	8986436
ERBB2	ERBB2	CETUXIMAB		JAX-CKB,CIViC	2.25867e+47
ERBB2	ERBB2	SUNITINIB		JAX-CKB	24606768
ERBB2	ERBB2	OLAPARIB		JAX-CKB,PharmGKB,FDA
ERBB2	ERBB2	ROMIDEPSIN		NCI	11929951
ERBB2	ERBB2	URACIL		NCI	1682063
ERBB2	ERBB2	GEMCITABINE		JAX-CKB,NCI	15581051
ERBB2	ERBB2	ANTHRAQUINONE		NCI	16357514
ERBB2	ERBB2	TIVOZANIB		JAX-CKB	25995436
ERBB2	ERBB2	FILGRASTIM		NCI	16549824
ERBB2	ERBB2	FULVESTRANT		CGI,PharmGKB,FDA
ERBB2	ERBB2	CISPLATIN		JAX-CKB
ERBB2	ERBB2	SELUMETINIB		JAX-CKB	24971884
ERBB3	ERBB3	PATRITUMAB	inhibitor	ChemblInteractions,TTD
ERBB3	ERBB3	DACOMITINIB	inhibitor	ChemblInteractions,MyCancerGenomeClinicalTrial
ERBB3	ERBB3	DULIGOTUZUMAB	antibody	MyCancerGenome,TTD
ERBB3	ERBB3	SAPITINIB	inhibitor	TALC,MyCancerGenome,ChemblInteractions,GuideToPharmacology
ERBB3	ERBB3	AV-203	antibody	TALC,TTD
ERBB3	ERBB3	POZIOTINIB	inhibitor	ChemblInteractions,MyCancerGenomeClinicalTrial
ERBB3	ERBB3	GEFITINIB	inhibitor	CIViC,MyCancerGenomeClinicalTrial,PharmGKB	24685132
ERBB3	ERBB3	AMG-888	antibody	TALC,MyCancerGenome
ERBB3	ERBB3	VANDETANIB	inhibitor	ChemblInteractions
ERBB3	ERBB3	MM-121	antagonist,antibody	MyCancerGenome,ClearityFoundationClinicalTrial,ChemblInteractions,TTD
ERBB3	ERBB3	ISTIRATUMAB	antibody	GuideToPharmacology,TTD
ERBB3	ERBB3	ELGEMTUMAB	antibody	GuideToPharmacology,TTD
ERBB3	ERBB3	MM-111	antibody	MyCancerGenome,TdgClinicalTrial,GuideToPharmacology
ERBB3	ERBB3	OSIMERTINIB MESYLATE	inhibitor	ChemblInteractions
ERBB3	ERBB3	SERIBANTUMAB	antibody	GuideToPharmacology,TTD
ERBB3	ERBB3	CETUXIMAB		CIViC	25520391
ERBB3	ERBB3	TRASTUZUMAB		CGI,DoCM,CIViC,PharmGKB	2.36801e+23
ERBB3	ERBB3	PERTUZUMAB		CGI,DoCM,CIViC	2.36801e+23
ERBB3	ERBB3	LAPATINIB		CGI,DoCM,CIViC,PharmGKB	2.36801e+23
ERBB3	ERBB3	SELUMETINIB		CIViC	2595264824685130
ERBB3	ERBB3	AFATINIB		CGI,CIViC	2704493124685130
ERBB3	ERBB3	ERLOTINIB		PharmGKB
ERBB3	ERBB3	DIMETHYLCURCUMIN		DTC	25753330
ERBB3	ERBB3	METHYLCURCUMIN		DTC	25753330
ERBB3	ERBB3	CURCUMIN		DTC	25753330
ERBB3	ERBB3	DOCETAXEL		PharmGKB	30071039
ERBB3	ERBB3	TRAMETINIB		CIViC	25952648
ERBB3	ERBB3	CARBOPLATIN		PharmGKB	30071039
ERBB3	ERBB3	AC-480		TdgClinicalTrial
ERBB3	ERBB3	MARGETUXIMAB		ClearityFoundationClinicalTrial
ESRRA	ESRRA	CHEMBL189753	antagonist	GuideToPharmacology
ESRRA	ESRRA	DAIDZEIN	agonist	GuideToPharmacology
ESRRA	ESRRA	GENISTEIN	agonist	GuideToPharmacology	1463887015955690
ESRRA	ESRRA	PREGNENOLONE		TTD
ESRRA	ESRRA	RIMEXOLONE		TTD
ESRRA	ESRRA	FULVESTRANT		DTC	23448346
ESRRA	ESRRA	ESTRADIOL		DTC	23448346
F12	F12	PENTAMIDINE ISETHIONATE		DTC
F12	F12	BORTEZOMIB		DTC	20875739
FAM177A1	FAM177A1	LITHIUM		PharmGKB	29121268
FARP2	FARP2	METHYLPHENIDATE		PharmGKB	29382897
FASLG	FASLG	ASUNERCEPT		TdgClinicalTrial
FCGRT	FCGRT	ROZANOLIXIZUMAB	antibody	GuideToPharmacology
FEN1	FEN1	CHEMBL257991		DTC
FEN1	FEN1	LOMOFUNGIN		DTC
FEN1	FEN1	CEPHALOCHROMIN		DTC
FEN1	FEN1	PROTOPORPHYRIN DISODIUM		DTC
FEN1	FEN1	CHEMBL1092508		DTC
FEN1	FEN1	METHYLDOPA		DTC
FEN1	FEN1	CHEMBL136344		DTC
FEN1	FEN1	EBSELEN		DTC
FEN1	FEN1	OXIDOPAMINE HYDROCHLORIDE		DTC
FEN1	FEN1	CHEMBL461193		DTC
FEN1	FEN1	CHEMBL1256291		DTC
FEN1	FEN1	GW305074X		DTC
FEN1	FEN1	CHEMBL494668		DTC
FEN1	FEN1	PICEATANNOL		DTC
FEN1	FEN1	HOMIDIUM BROMIDE		DTC
FEN1	FEN1	CATECHOL		DTC
FEN1	FEN1	CHEMBL463783		DTC
FEN1	FEN1	CARMINE		DTC
FEN1	FEN1	HAEMATOXYLIN		DTC
FEN1	FEN1	DEMECLOCYCLINE		DTC
FEN1	FEN1	METHOXSALEN		NCI	3319774
FEN1	FEN1	CHEMBL585622		DTC
FEN1	FEN1	CHEMBL68096		DTC
FEN1	FEN1	CHEMBL576409		DTC
FEN1	FEN1	CHEMBL596633		DTC
FEN1	FEN1	DEQUALINIUM		DTC
FEN1	FEN1	CHEMBL581225		DTC
FEN1	FEN1	CHEMBL1622802		DTC
FEN1	FEN1	SLAZINIC ACID		DTC
FEN1	FEN1	PROTOPORPHYRIN		DTC
FEN1	FEN1	PHENYLSTIBONIC ACID		DTC
FEN1	FEN1	DIOTYROSINE		DTC
FEN1	FEN1	FAGARONINE		DTC
FEN1	FEN1	CHEMBL601137		DTC
FEN1	FEN1	CHEMBL1312050		DTC
FEN1	FEN1	CHEMBL1255944		DTC
FEN1	FEN1	CHEMBL223575		DTC
FEN1	FEN1	MITOXANTRONE		DTC
FEN1	FEN1	SANGUINARINE SULFATE		DTC
FEN1	FEN1	CHEMBL578257		DTC
FEN1	FEN1	CHEMBL525103		DTC
FEN1	FEN1	CHEMBL124006		DTC
FEN1	FEN1	CHEMBL578719		DTC
FEN1	FEN1	CHEMBL86464		DTC
FEN1	FEN1	CHEMBL526763		DTC
FEN1	FEN1	CHEMBL1448793		DTC
FEN1	FEN1	ALEXIDINE HYDROCHLORIDE		DTC
FEN1	FEN1	CIANIDANOL		DTC
FEN1	FEN1	TOLONIUM CHLORIDE		DTC
FEN1	FEN1	CLOSANTEL		DTC
FEN1	FEN1	PENTABROMOPHENOL		DTC
FEN1	FEN1	CHEMBL515252		DTC
FEN1	FEN1	CHEMBL585502		DTC
FEN1	FEN1	AMENTOFLAVONE		DTC
FEN1	FEN1	TRANSPLATIN		DTC
FEN1	FEN1	OXOGLAUCINE		DTC
FEN1	FEN1	CHEMBL578741		DTC
FEN1	FEN1	PINAFIDE		DTC
FEN1	FEN1	CHEMBL579742		DTC
FEN1	FEN1	ISOKAEMPFERIDE		DTC
FEN1	FEN1	CHEMBL493863		DTC
FEN1	FEN1	MITONAFIDE		DTC
FEN1	FEN1	HEXAMETHYL PARAROSANILINE		DTC
FEN1	FEN1	CHEMBL477936		DTC
FEN1	FEN1	MITOXANTRONE HYDROCHLORIDE		DTC
FEN1	FEN1	EMODIN		DTC
FEN1	FEN1	CHEMBL478754		DTC
FEN1	FEN1	CHEMBL533082		DTC
FEN1	FEN1	SURAMIN		DTC
FEN1	FEN1	FRAXETIN		DTC
FEN1	FEN1	CHEMBL528724		DTC
FEN1	FEN1	PYRONIN Y		DTC
FEN1	FEN1	CHARTREUSIN		DTC
FEN1	FEN1	CARMINIC ACID		DTC
FEN1	FEN1	CHEMBL585240		DTC
FEN1	FEN1	CHEMBL1287983		DTC
FEN1	FEN1	QUERCETIN		DTC
FEN1	FEN1	CHEMBL1726814		DTC
FEN1	FEN1	CHEMBL522983		DTC
FEN1	FEN1	COUMESTROL		DTC
FEN1	FEN1	CHEMBL1701915		DTC
FEN1	FEN1	EUPAFOLIN		DTC
FEN1	FEN1	CHEMBL95704		DTC
FEN1	FEN1	CHEMBL584458		DTC
FEN1	FEN1	DAUNORUBICIN HYDROCHLORIDE		DTC
FEN1	FEN1	CHEMBL1341830		DTC
FEN1	FEN1	SANGUINARIUM CHLORIDE		DTC
FEN1	FEN1	PURPURIN		DTC
FEN1	FEN1	CHEMBL1451216		DTC
FEN1	FEN1	CLINAFLOXACIN		DTC
FEN1	FEN1	DEOXIEPINEPHRINE		DTC
FEN1	FEN1	CHEMBL106525		DTC
FEN1	FEN1	ACRIFLAVINE		DTC
FEN1	FEN1	CHEMBL338115		DTC
FEN1	FEN1	THIMEROSAL		DTC
FEN1	FEN1	PAMOIC ACID		DTC
FEN1	FEN1	CHEMBL547833		DTC
FEN1	FEN1	CHEMBL505670		DTC
FEN1	FEN1	MORIN		DTC
FEN1	FEN1	DOPAMINE		DTC
FEN1	FEN1	CHEMBL532504		DTC
FEN1	FEN1	CHEMBL576781		DTC
FEN1	FEN1	LEVODOPA		DTC
FEN1	FEN1	CHEMBL601364		DTC
FEN1	FEN1	DOXYCYCLINE		DTC
FEN1	FEN1	METHYLDOPA (RACEMIC)		DTC
FEN1	FEN1	CEFSULODIN SODIUM		DTC
FEN1	FEN1	ISOTHYMONIN		DTC
FEN1	FEN1	CHEMBL602365		DTC
FEN1	FEN1	RHEIN		DTC
FEN1	FEN1	OXYTETRACYCLINE		DTC
FEN1	FEN1	HYDROXYZINE PAMOATE		DTC
FEN1	FEN1	STICTIC ACID		DTC
FEN1	FEN1	CHEMBL585591		DTC
FEN1	FEN1	CHEMBL1509103		DTC
FEN1	FEN1	BENSERAZIDE HYDROCHLORIDE		DTC
FEN1	FEN1	CHEMBL592316		DTC
FEN1	FEN1	METHYLTHIONINIUM CHLORIDE		DTC
FEN1	FEN1	ELLIPTECINE		DTC
FEN1	FEN1	HISPIDIN		DTC
FEN1	FEN1	CHEMBL602127		DTC
FEN1	FEN1	ELLAGIC ACID		DTC
FEN1	FEN1	3-O-METHYLQUERCETIN		DTC
FEN1	FEN1	HYCANTHONE		DTC
FEN1	FEN1	TYRPHOSTIN 51		DTC
FEN1	FEN1	TETRAIDOFLUORESCEIN		DTC
FEN1	FEN1	CHEMBL592124		DTC
FEN1	FEN1	CHEMBL234338		DTC
FEN1	FEN1	4-CHLOROMERCURIBENZOIC ACID		DTC
FEN1	FEN1	TAXIFOLIN		DTC
FEN1	FEN1	NORDIHYDROGUAIARETIC ACID		DTC
FEN1	FEN1	LUTEOLIN		DTC
FEN1	FEN1	CHEMBL56731		DTC
FEN1	FEN1	CHEMBL1528359		DTC
FEN1	FEN1	CHEMBL461579		DTC
FEN1	FEN1	CHEMBL68534		DTC
FEN1	FEN1	CALMIDAZOLIUM CHLORIDE		DTC
FEN1	FEN1	CHEMBL521171		DTC
FEN1	FEN1	FURAMIDINE		DTC
FEN1	FEN1	APOMORPHINE HYDROCHLORIDE HEMIHYDRATE		DTC
FEN1	FEN1	DEPHOSTATIN		DTC
FEN1	FEN1	CHEMBL486706		DTC
FEN1	FEN1	CHEMBL151146		DTC
FEN1	FEN1	CHEMBL1287980		DTC
FEN1	FEN1	CHEMBL592598		DTC
FEN1	FEN1	CHEMBL1601846		DTC
FEN1	FEN1	STREPTONIGRIN		DTC
FEN1	FEN1	ATHRAQUINONES A		DTC
FEN1	FEN1	CHEMBL56393		DTC
FEN1	FEN1	CHEMBL569864		DTC
FEN1	FEN1	METHACYCLINE HYDROCHLORIDE		DTC
FEN1	FEN1	OXOPURPUREINE		DTC
FEN1	FEN1	CHEMBL589915		DTC
FEN1	FEN1	CHEMBL22062		DTC
[truncated: 2,047 more rows]

## Sheet: by database
Gene	Drug	ChemblInteractions	TTD	TdgClinicalTrial	TEND	DTC	CIViC	NCI	JAX.CKB	GuideToPharmacology	PharmGKB	MyCancerGenomeClinicalTrial	CancerCommons	OncoKB	MyCancerGenome	CGI	ClearityFoundationClinicalTrial	TALC	FDA	ClearityFoundationBiomarkers	DoCM	PMID	Score
VKORC1	WARFARIN	0	1	1	1	0	0	0	0	1	1	0	0	0	0	0	0	0	1	0	0	20072124,21174619,21326313,26445138,14765195,18752379,21635147,24029542,25042728,23602689,16815312,28262345,20833980,17110455,22534826,17124101,17042764,21383771,22528326,29781049,24474498,15358623,25594941,16611310,27581200,27262824,25026456,28382498,21318593,17015052,16141794,18466099,25519826,25312789,19875892,16580898,17989110,16432637,31653973,19135231,16888441,27488176,21900891,19387626,222…	166
ERBB2	TRASTUZUMAB	1	1	1	0	0	1	1	1	1	1	0	0	1	1	1	1	1	1	1	1	27900589,26619011,20504363,16091755,31453370,17936563,22257673,19840887,2013,21676217,26759238,30452336,26598547,24470511,28784859,27140927,11248153,27108243,22908275,21107682,18555254,26880266,15236790,26296355,22149875,23801166,29523624,26469692,26874901,22850551,24691421,25601188,24606768,24982373,26104654,17660958,20728210,11098307,20975068,17679724,27626067,23948973,26099744,28167203,3085795…	94
ERBB2	LAPATINIB	0	1	1	1	1	1	0	1	1	1	0	0	1	1	1	0	1	1	1	1	26619011,25305330,17192538,20179222,16091755,27595477,12214266,24516025,22257673,20110044,18413839,27197158,27140927,15374980,26270481,27108243,22908275,24971884,14633707,22586653,27760111,26296355,26570998,2015169,18774637,27450453,24355130,16894399,27900369,23948973,14751502,27026198,23940356,25398453,24868024,26245675,19786658,26811533,11752352,14737100,18803986,23122784,25157968,15163842,2204…	77
VKORC1	ACENOCOUMAROL	0	1	1	1	0	0	0	0	0	1	0	0	0	0	0	0	0	0	0	0	22920394,26445138,25042728,19225451,19018719,23602689,18781852,24474498,16611310,27581200,27262824,17596133,25519826,19875892,19277427,27488176,24956252,18574025,29577257,30983536,29479633,27335128,25769357,25089947,21148049,26777610,25244877,28689179,23651023,25001883,18950464,19270263,24919870,24108193,22571356,18698879,11752352,18690342,23774101,25521356,21636598,22592842,22486182,29432897,234…	58
TOP2A	ETOPOSIDE	1	0	1	1	1	0	1	0	1	0	0	0	0	0	0	0	0	0	0	0	25466187,20006518,18258442,8823806,22867019,25240702,26291037,25003995,26216018,26292628,23360284,16271071,23920485,21435753,22867097,16759114,11678653,19386396,24931277,23566520,17361331,25922181,25941559,24507920,24775914,9485461,23353750,25815139,16309315,24012683,19691293,25800514,21644529,22620261,25945730,24334150,17514873,8870683,23711769,11752352,20863598,24095018,26264845,25799376,223647…	58
VKORC1	PHENPROCOUMON	1	1	1	1	0	0	0	0	1	1	0	0	0	0	0	0	0	0	0	0	22920394,26445138,19225451,18629445,23602689,20833980,16201835,18781852,24474498,27581200,27262824,17596133,17192772,25519826,20376629,27488176,26984978,18574025,29577257,30983536,25769357,21057703,3207986,21148049,26777610,25244877,28689179,25001883,18950464,19270263,24919870,22571356,2706010,18698879,11752352,18690342,23774101,25521356,21636598,22592842,23299853,29432897,23423913,28033245,16815…	53
ERBB2	NERATINIB	1	1	1	0	0	1	0	1	1	1	1	0	1	1	1	0	1	1	0	1	2.6619e+199	39
TNF	INFLIXIMAB	1	1	1	1	0	0	0	0	0	1	0	0	0	0	0	0	0	0	0	0	16720636,16909270,23057546,16456024,26244882,12847678,18050183,18713756,19365401,22760475,16052578,24192118,12110154,17343250,22960943,15481318,15691299,15674127,15804598,22129793,11752352,25311255,12190096,18438841,15691217,17673491,15695296,17642244,16622728	34
ERBB2	AFATINIB	0	0	1	0	0	1	0	1	1	0	1	0	0	1	1	0	1	0	0	0	1.91221e+191	32
TNF	ADALIMUMAB	1	1	1	1	0	0	0	0	0	1	0	0	0	0	0	0	0	0	0	0	1.2044e+167	26
TNF	ETANERCEPT	1	1	1	1	0	0	0	0	0	1	0	0	0	0	0	0	0	0	0	0	1.67206e+167	26
ERBB2	PERTUZUMAB	1	1	1	0	0	1	0	1	1	1	0	0	1	1	1	0	1	1	1	0	3.14534e+87	24
TOP2A	AMSACRINE	0	0	0	0	1	0	1	0	0	0	0	0	0	0	0	0	0	0	0	0	1.32279e+114	17
HSP90AB1	GELDANAMYCIN	0	0	0	0	1	0	0	0	1	0	0	0	0	0	0	0	0	0	0	0	2.57563e+103	15
ERBB2	DACOMITINIB	1	1	1	0	0	1	0	1	1	0	1	0	0	1	1	0	1	0	0	0	2.21352e+39	15
TOP2A	DOXORUBICIN	0	0	1	1	1	0	0	0	1	0	0	0	0	0	0	1	0	0	0	0	2.13881e+79	15
CCR5	MARAVIROC	1	1	1	1	1	0	0	0	1	1	0	0	0	0	0	0	0	0	0	0	1.62983e+47	13
DDC	CARBIDOPA	1	1	1	1	0	0	0	0	1	1	0	0	0	0	0	0	0	0	0	0	1.28858e+55	13
IL1R1	ANAKINRA	1	1	1	1	0	0	1	0	0	0	0	0	0	0	0	0	0	0	0	0	1.7083e+62	13
CHRNB2	NICOTINE	1	0	1	1	1	0	0	0	0	1	0	0	0	0	0	0	0	0	0	0	1.66368e+63	13
GART	PEMETREXED	0	0	1	1	0	0	0	0	0	0	0	0	0	0	0	0	0	0	0	0	1.25718e+79	12
RARA	ALITRETINOIN	1	0	0	1	1	0	0	0	1	0	0	0	0	0	0	0	0	0	0	0	1.61443e+62	12
TOP2A	MITOXANTRONE	0	0	1	1	0	0	1	0	1	0	0	0	0	0	0	0	0	0	0	0	1.04514e+60	12
IL2RA	DACLIZUMAB	1	0	1	1	0	0	0	0	1	0	0	0	0	0	0	0	0	0	0	0	1.69083e+54	11
IL2RA	BASILIXIMAB	1	1	1	1	0	0	0	0	1	0	0	0	0	0	0	0	0	0	0	0	1.25914e+46	11
HDAC7	VORINOSTAT	0	0	0	0	1	0	0	0	0	0	0	0	0	1	0	0	1	0	0	0	1.93442e+63	11
RARA	ADAPALENE	1	0	1	1	0	0	0	0	1	0	0	0	0	0	0	0	0	0	0	0	3.12731e+51	11
TOP2A	TENIPOSIDE	1	0	1	1	0	0	1	0	0	0	0	0	0	0	0	0	0	0	0	0	8.70219e+53	11
PTGER4	DINOPROSTONE	0	0	1	1	1	0	0	0	1	0	0	0	0	0	0	0	0	0	0	0	1.73292e+47	10
TNF	THALIDOMIDE	0	1	1	1	0	0	0	0	0	0	0	0	0	0	0	0	0	0	0	0	8.75551e+54	10
HSP90AB1	TANESPIMYCIN	1	0	1	0	1	0	0	0	0	0	0	0	0	1	0	0	0	0	0	0	2.52771e+47	10
IL2RA	ALDESLEUKIN	1	0	1	1	0	0	0	0	0	0	0	0	0	0	0	0	0	0	0	0	1.75846e+55	10
SCNN1A	TRIAMTERENE	1	0	1	1	0	0	0	0	0	1	0	0	0	0	0	0	0	0	0	0	2.3788e+46	10
ERBB2	AC-480	1	1	1	0	1	0	0	1	1	0	0	0	0	1	0	0	1	0	0	0	1982156221576280	10
ERBB2	GEFITINIB	0	0	0	0	1	0	1	1	0	1	1	0	0	0	0	0	0	0	0	0	2.65459e+39	10
ERBB2	CAPECITABINE	0	0	0	0	0	1	0	1	0	0	0	0	0	0	0	0	0	0	0	0	2.05044e+63	10
ERBB2	DOCETAXEL	0	0	0	0	0	1	0	1	0	1	0	0	0	0	0	0	0	0	0	0	3.04523e+55	10
RARA	TAZAROTENE	1	0	1	1	0	0	0	0	1	0	0	0	0	0	0	0	0	0	0	0	1.61443e+46	10
TOP2A	DEXRAZOXANE	0	0	0	0	0	0	1	0	0	0	0	0	0	0	0	0	0	0	0	0	1.11794e+71	10
IL6R	TOCILIZUMAB	1	1	1	1	0	0	0	0	0	1	0	0	0	1	0	0	0	0	0	0	1.68991e+31	10
IL2RB	ALDESLEUKIN	1	0	1	1	0	0	0	0	0	0	0	0	0	0	0	0	0	0	0	0	1.65962e+47	9
KCNJ1	MINOXIDIL	0	0	1	1	0	0	0	0	0	0	0	0	0	0	0	0	0	0	0	0	9.64601e+52	9
KCNJ1	GLYMIDINE	0	0	1	1	0	0	0	0	0	0	0	0	0	0	0	0	0	0	0	0	1.64702e+53	9
TNFSF11	DENOSUMAB	1	1	1	1	0	0	0	0	0	0	0	0	0	1	0	1	1	0	0	0	1670219718685420	9
VKORC1	PHENINDIONE	1	1	1	1	0	0	0	0	1	0	0	0	0	0	0	0	0	0	0	0	1.17524e+30	9
VKORC1	DICUMAROL	1	1	1	1	0	0	0	0	1	0	0	0	0	0	0	0	0	0	0	0	1.17524e+30	9
ERBB2	PACLITAXEL	0	0	0	0	0	1	0	1	0	0	0	0	0	0	0	0	0	0	0	0	2.48864e+55	9
RARA	TAMIBAROTENE	0	1	1	1	0	0	0	0	1	0	0	0	0	0	0	0	0	0	0	0	1.76117e+39	9
ITGA4	NATALIZUMAB	1	0	1	1	0	0	0	0	1	0	0	0	0	0	0	0	0	0	0	0	1.6634e+38	9
CTLA4	IPILIMUMAB	1	1	1	0	0	0	0	0	1	0	0	1	0	1	0	1	1	0	0	0	18049334	9
CDK6	RIBOCICLIB	1	1	1	0	0	1	0	0	0	0	0	0	0	1	1	0	0	0	0	0	2404517929408320	8
IL2RA	DENILEUKIN DIFTITOX	1	0	0	0	0	0	0	0	0	0	0	0	0	0	0	0	0	0	0	0	1.86841e+53	8
SCNN1A	AMILORIDE	0	0	1	1	0	0	0	0	0	1	0	0	0	0	0	0	0	0	0	0	2.3788e+39	8
CDK2	DINACICLIB	1	0	0	0	1	0	0	0	1	0	1	1	0	1	0	1	0	0	0	0	23600925	8
CDK2	SELICICLIB	1	1	1	0	1	0	0	0	1	0	0	0	0	1	0	0	0	0	0	0	1710810821080700	8
ERBB2	TUCATINIB	0	1	1	0	0	0	0	1	1	0	0	0	0	0	0	0	1	0	0	0	3.22419e+23	8
ERBB2	TESEVATINIB	1	0	1	0	0	0	0	1	1	0	0	0	0	1	0	0	1	0	0	0	1841383919718020	8
ERBB2	CETUXIMAB	0	0	0	0	0	1	0	1	0	0	0	0	0	0	0	0	0	0	0	0	2.25867e+47	8
RARA	ISOTRETINOIN	1	0	1	1	0	0	0	0	0	0	0	0	0	0	0	0	0	0	0	0	1.09558e+36	8
RARA	TRETINOIN	1	0	0	0	1	0	0	0	1	1	0	0	0	0	0	0	0	1	0	0	2.58381e+22	8
TOP2A	PODOFILOX	0	0	1	1	0	0	0	0	0	0	0	0	0	0	0	0	0	0	0	0	1.60614e+44	8
TOP2A	IDARUBICIN	0	0	1	1	0	0	0	0	0	0	0	0	0	0	0	0	0	0	0	0	1.02031e+46	8
IL6R	SARILUMAB	1	1	0	0	0	0	0	0	1	0	0	0	0	0	0	0	0	0	0	0	2.82648e+39	8
IFNAR2	INTERFERON ALFA-N3	1	0	0	0	0	0	0	0	0	0	0	0	0	0	0	0	0	0	0	0	1.69538e+47	7
IL2RB	BASILIXIMAB	1	0	0	0	0	0	0	0	0	0	0	0	0	0	0	0	0	0	0	0	1.07081e+47	7
IL2RB	DACLIZUMAB	1	0	0	0	0	0	0	0	0	0	0	0	0	0	0	0	0	0	0	0	1.50224e+45	7
CCR4	MOGAMULIZUMAB	0	1	0	0	0	0	0	0	1	0	0	0	0	1	0	0	0	0	0	0	2.57927e+31	7
SLC29A1	GEMCITABINE	0	0	0	0	0	0	0	0	0	1	0	0	0	0	1	0	0	0	0	0	2.51628e+39	7
CDK6	PALBOCICLIB	1	0	0	0	0	0	0	0	1	0	1	1	0	1	0	0	0	0	0	0	2820330115542780	7
PLAU	UROKINASE	0	1	1	0	0	0	0	0	0	0	0	0	0	0	0	0	0	0	0	0	1.2824e+39	7
SLC22A11	PROBENECID	1	0	1	1	0	0	0	0	0	0	0	0	0	0	0	0	0	0	0	0	1.20632e+31	7
KCNJ1	ACETOHEXAMIDE	0	0	1	1	0	0	0	0	0	0	0	0	0	0	0	0	0	0	0	0	1.07512e+39	7
HDAC7	BELINOSTAT	1	0	1	0	1	0	0	0	1	0	0	0	0	1	0	0	1	0	0	0	25937017	7
CDK2	AT-7519	1	1	1	0	1	0	0	0	1	0	0	0	0	0	0	0	0	0	0	0	1059223518656910	7
ERBB3	TRASTUZUMAB	0	0	0	0	0	1	0	0	0	1	0	0	0	0	1	0	0	0	0	1	2.36801e+23	7
ERBB3	LAPATINIB	0	0	0	0	0	1	0	0	0	1	0	0	0	0	1	0	0	0	0	1	2.36801e+23	7
SCNN1D	AMILORIDE	0	0	1	1	0	0	0	0	0	0	0	0	0	0	0	0	0	0	0	0	1.61075e+39	7
ERBB2	CUDC-101	1	1	1	0	0	0	0	1	1	0	0	0	0	0	0	0	1	0	0	0	25107918	7
ERBB2	SAPITINIB	1	1	0	0	0	0	0	1	1	0	0	0	0	1	0	0	1	0	0	0	24886365	7
ERBB2	MARGETUXIMAB	1	1	1	0	0	0	0	1	1	0	0	0	0	0	0	0	0	0	0	0	2811929522129100	7
ERBB2	PALBOCICLIB	0	0	0	0	0	0	0	1	0	1	0	0	0	0	1	0	0	1	0	0	2.70209e+23	7
ERBB2	EVEROLIMUS	0	0	0	0	0	0	0	1	0	1	0	0	0	0	1	0	0	1	0	0	2.11077e+23	7
RARA	ACITRETIN	1	0	1	1	0	0	0	0	0	0	0	0	0	0	0	0	0	0	0	0	9.07484e+29	7
TOP2A	DAUNORUBICIN	0	0	1	0	1	0	1	0	0	0	0	0	0	0	0	0	0	0	0	0	2.22602e+28	7
TOP2A	AMONAFIDE	0	0	1	0	1	0	0	0	0	0	0	0	0	0	0	0	0	0	0	0	2.40545e+39	7
PDCD1	NIVOLUMAB	1	1	1	0	0	0	0	0	1	0	0	0	0	1	0	1	0	0	0	0	23289116	7
IL2RB	DENILEUKIN DIFTITOX	1	0	0	0	0	0	0	0	0	0	0	0	0	0	0	0	0	0	0	0	1.86841e+39	6
NQO2	MENADIONE	0	0	0	1	0	0	0	0	0	0	0	0	0	0	0	0	0	0	0	0	1.67653e+39	6
KCNJ1	GLIMEPIRIDE	0	0	1	1	0	0	0	0	0	0	0	0	0	0	0	0	0	0	0	0	1.27031e+31	6
HDAC7	TRICHOSTATIN	0	0	0	0	1	0	0	0	0	0	0	0	0	0	0	0	0	0	0	0	2.10558e+39	6
CDK2	ALVOCIDIB	1	0	1	0	0	0	0	0	1	0	0	0	0	1	0	0	0	0	0	0	1846553811752350	6
ERBB3	PERTUZUMAB	0	0	0	0	0	1	0	0	0	0	0	0	0	0	1	0	0	0	0	1	2.36801e+23	6
IL23A	USTEKINUMAB	1	1	1	1	0	0	0	0	0	1	0	0	0	0	0	0	0	1	0	0		6
PRKCB	ENZASTAURIN	1	1	1	0	0	0	0	0	1	0	0	0	0	1	0	0	1	0	0	0		6
VKORC1	MENADIONE	0	0	1	1	0	0	0	0	0	0	0	0	0	0	0	0	0	0	0	0	1.71393e+31	6
ERBB2	BMS-690514	1	0	0	0	0	0	0	1	1	0	0	0	0	1	0	0	1	0	0	0	21531814	6
ERBB2	TAK-285	1	1	0	0	0	0	0	1	0	0	0	0	0	0	0	0	0	0	0	0	2.5594e+23	6
ERBB2	MK-2206	0	0	0	0	0	0	0	1	0	0	0	0	0	0	1	0	0	0	0	0	2.01326e+23	6
RARA	ETRETINATE	1	0	0	0	0	0	0	0	0	0	0	0	0	0	0	0	0	0	0	0	1.96589e+35	6
TOP2A	EPIRUBICIN	0	0	1	1	0	0	0	0	0	1	0	0	0	0	0	0	0	0	0	0	1.47289e+23	6
CTLA4	TREMELIMUMAB	1	1	1	0	0	0	0	0	1	0	0	0	0	1	0	0	1	0	0	0		6
PSMD1	BORTEZOMIB	1	0	1	1	1	0	0	0	0	0	0	0	0	1	0	0	0	0	0	0	24524217	6
IFNAR2	INTERFERON ALFA-2B	1	0	0	0	0	0	0	0	0	0	0	0	0	0	0	0	0	0	0	0	1.17524e+30	5
IFNGR2	INTERFERON GAMMA-1B	1	0	1	0	0	0	0	0	0	0	0	0	0	0	0	0	0	0	0	0	1.76184e+23	5
SSTR3	PASIREOTIDE	0	1	1	0	0	0	0	0	1	0	0	0	0	0	0	0	0	0	0	0	1198062817395970	5
CCR5	LERONLIMAB	1	1	0	0	0	0	0	0	1	0	0	0	0	0	0	0	0	0	0	0	1113427031903790	5
CCR5	VICRIVIROC	0	1	1	0	0	0	0	0	1	0	0	0	0	0	0	0	0	0	0	0	1724306518495770	5
IL5	MEPOLIZUMAB	1	1	1	0	0	0	0	0	0	0	0	0	0	0	0	0	0	0	0	0	1856427314699390	5
TNF	GOLIMUMAB	1	1	1	1	0	0	0	0	0	0	0	0	0	0	0	0	0	0	0	0	21079302	5
PSMB8	CARFILZOMIB	1	0	0	0	1	0	0	0	0	0	0	0	0	1	0	0	0	0	0	0	1759194524524210	5
PSMB9	CARFILZOMIB	1	0	0	0	1	0	0	0	0	0	0	0	0	1	0	0	0	0	0	0	1759194524524210	5
HSP90AB1	RADICICOL	0	0	0	0	1	0	0	0	0	0	0	0	0	0	0	0	0	0	0	0	2.49849e+31	5
CDK6	ALVOCIDIB	1	0	1	0	1	0	0	0	0	0	0	0	0	1	0	0	0	0	0	0	11752352	5
CDK6	ABEMACICLIB	1	1	0	0	0	0	0	0	1	0	0	1	0	0	0	0	0	0	0	0	24919854	5
KCNJ1	TOLBUTAMIDE	0	0	1	1	0	0	0	0	0	0	0	0	0	0	0	0	0	0	0	0	1.04552e+22	5
CDK2	SU-9516	1	0	0	0	0	0	0	0	0	0	0	0	0	0	0	0	0	0	0	0	1.05922e+31	5
CDK2	BMS-387032	1	1	1	0	0	0	0	0	1	0	0	1	0	0	0	0	0	0	0	0		5
CDK2	ZOTIRACICLIB	1	1	0	0	1	0	0	0	1	0	0	0	0	0	0	0	0	0	0	0	22148278	5
CDK2	OLOMOUCINE	0	0	0	0	1	0	0	0	0	0	0	0	0	0	0	0	0	0	0	0	1.05922e+31	5
SCNN1D	TRIAMTERENE	0	0	1	1	0	0	0	0	0	0	0	0	0	0	0	0	0	0	0	0	1.15098e+23	5
CYP11A1	AMINOGLUTETHIMIDE	1	1	0	0	0	0	0	0	0	0	0	0	0	0	0	0	0	0	0	0	1.17524e+23	5
ERBB2	CANERTINIB	0	1	0	0	0	0	0	1	1	0	0	0	0	1	0	0	0	0	0	0	16843263	5
ERBB2	POZIOTINIB	1	0	0	0	0	0	0	1	1	0	1	0	0	0	0	0	0	0	0	0	21306821	5
ERBB2	S-222611	1	1	0	0	0	0	0	1	0	0	0	0	0	0	0	0	0	0	0	0	2483729925434920	5
ERBB2	MM-111	0	1	1	0	0	0	0	1	1	0	0	0	0	1	0	0	0	0	0	0		5
ERBB2	IBRUTINIB	0	0	0	0	0	1	0	1	1	0	0	0	0	0	0	0	0	0	0	0	2725637828830910	5
ERBB2	AEE-788	1	0	0	0	0	0	0	1	1	0	0	0	0	1	0	0	0	0	0	0	22046346	5
ERBB2	MP-412	1	0	1	0	0	0	0	1	0	0	0	0	0	0	0	0	0	0	0	0	1788803319459850	5
ERBB2	BUPARLISIB	0	0	0	0	0	0	0	1	0	0	0	0	0	0	0	0	0	0	0	0	2.44705e+31	5
ERBB2	TAMOXIFEN	0	0	0	0	0	0	1	0	0	0	0	0	0	0	1	0	0	0	0	0	1.19162e+23	5
TOP2A	VALRUBICIN	1	0	1	1	0	0	0	0	0	0	0	0	0	0	0	0	0	0	0	0	1175235216019760	5
ATP5F1D	DESFLURANE	0	0	1	1	0	0	0	0	0	0	0	0	0	0	0	0	0	0	0	0	1.71393e+22	5
STK11	EVEROLIMUS	0	0	0	0	0	0	0	1	0	0	0	0	0	0	1	0	0	0	0	1	2118937827615700	5
GRIN3B	ORPHENADRINE	0	0	1	1	0	0	0	0	0	0	0	0	0	0	0	0	0	0	0	0	1.71393e+22	5
ELANE	SIVELESTAT	0	1	1	0	1	0	0	0	1	0	0	0	0	0	0	0	0	0	0	0	23350733	5
S1PR5	SIPONIMOD	1	0	0	0	0	0	0	0	1	0	0	0	0	0	0	0	0	0	0	0	2.68568e+23	5
DNMT3A	DECITABINE	1	0	0	0	0	1	0	1	0	0	0	0	0	0	0	0	0	0	0	0	2212421327418640	5
PDCD1	PEMBROLIZUMAB	1	1	0	0	0	0	0	0	1	0	0	0	0	1	0	0	0	0	0	0	25685857	5
SLAMF7	ELOTUZUMAB	1	0	1	0	0	0	0	0	1	0	0	0	0	1	0	0	0	0	0	0	26809244	5
SSTR3	SOMATOSTATIN	0	0	0	0	1	0	0	0	1	0	0	0	0	0	0	0	0	0	0	0	2595646721806010	4
CCR5	CENICRIVIROC	1	1	1	0	0	0	0	0	1	0	0	0	0	0	0	0	0	0	0	0		4
CCR5	CHEMBL207004	0	1	0	0	1	0	0	0	1	0	0	0	0	0	0	0	0	0	0	0	26451468	4
NFKB1	THALIDOMIDE	0	0	1	1	0	0	0	0	0	0	0	0	0	0	0	0	0	0	0	0	1175235215723630	4
CHD1	EPIRUBICIN	0	0	1	1	0	0	0	0	0	0	0	0	0	0	0	0	0	0	0	0	1713928417016420	4
IL10	SIROLIMUS	0	0	0	0	0	0	1	0	0	1	0	0	0	0	0	0	0	0	0	0	1290762022094950	4
TNF	CARBAMAZEPINE	0	0	0	0	0	0	1	0	0	1	0	0	0	0	0	0	0	0	0	0	1556543211294920	4
HLA-DQB1	ASPIRIN	0	0	0	0	0	0	0	0	0	1	0	0	0	0	0	0	0	0	0	0	2.63668e+23	4
PSMB8	BORTEZOMIB	1	0	0	0	1	0	0	0	0	0	0	0	0	1	0	0	0	0	0	0	24524217	4
PSMB9	BORTEZOMIB	1	0	0	0	1	0	0	0	0	0	0	0	0	1	0	0	0	0	0	0	24524217	4
HLA-DQA1	LAPATINIB	0	0	0	0	0	0	0	0	0	1	0	0	0	0	0	0	0	1	0	0	2468783021245430	4
CDKN1A	FLUOROURACIL	0	0	0	0	0	1	1	0	0	0	0	0	0	0	0	0	0	0	0	0	2470848415067350	4
IL2RA	METHIMAZOLE	0	0	0	0	0	0	1	0	0	0	0	0	0	0	0	0	0	0	0	0	7.64757e+20	4
OAT	GABACULINE	0	0	0	0	1	0	0	0	0	0	0	0	0	0	0	0	0	0	0	0	2.62887e+23	4
PTGDR2	OC000459	1	1	1	0	0	0	0	0	1	0	0	0	0	0	0	0	0	0	0	0		4
PTGDR2	INDOMETHACIN	0	0	0	0	0	0	0	0	1	0	0	0	0	0	0	0	0	0	0	0	1.603e+23	4
MAP3K11	CEP-1347	1	0	0	0	1	0	0	0	1	0	0	0	0	0	0	0	0	0	0	0	24044867	4
HDAC7	CUDC-101	1	0	1	0	0	0	0	0	1	0	0	0	0	0	0	0	1	0	0	0		4
HDAC7	PANOBINOSTAT	0	0	1	0	0	0	0	0	1	0	0	0	0	1	0	0	1	0	0	0		4
HDAC7	ROMIDEPSIN	1	0	1	0	0	0	0	0	1	0	0	0	0	1	0	0	0	0	0	0		4
HDAC7	ENTINOSTAT	1	0	0	0	1	0	0	0	0	0	0	0	0	0	0	0	0	0	0	0	1996678920491440	4
HDAC7	MOCETINOSTAT	0	0	1	0	1	0	0	0	0	0	0	0	0	0	0	0	0	0	0	0	2382948326287310	4
HDAC7	LARGAZOLE	0	0	0	0	1	0	0	0	0	0	0	0	0	0	0	0	0	0	0	0	2.14203e+23	4
HDAC7	VALPROIC ACID	0	0	0	0	1	0	0	0	0	0	0	0	0	0	0	0	0	0	0	0	1.82948e+23	4
CDK2	MILCICLIB	1	0	0	0	1	0	0	0	1	0	0	0	0	0	0	0	0	0	0	0	19603809	4
ERBB3	SAPITINIB	1	0	0	0	0	0	0	0	1	0	0	0	0	1	0	0	1	0	0	0		4
ERBB3	GEFITINIB	0	0	0	0	0	1	0	0	0	1	1	0	0	0	0	0	0	0	0	0	24685132	4
ERBB3	MM-121	1	1	0	0	0	0	0	0	0	0	0	0	0	1	0	1	0	0	0	0		4
ERBB3	AFATINIB	0	0	0	0	0	1	0	0	0	0	0	0	0	0	1	0	0	0	0	0	2704493124685130	4
PSMA6	CARFILZOMIB	1	0	0	0	1	0	0	0	0	0	0	0	0	1	0	0	0	0	0	0	24524217	4
PSMA6	BORTEZOMIB	1	0	0	0	1	0	0	0	0	0	0	0	0	1	0	0	0	0	0	0	24524217	4
HIF1A	EPOETIN ALFA	0	0	0	0	0	0	1	0	0	0	0	0	0	0	0	0	0	0	0	0	1.19862e+23	4
RORA	CHOLESTEROL	0	0	0	0	0	0	0	0	1	0	0	0	0	0	0	0	0	0	0	0	1.05922e+23	4
ERBB2	VARLITINIB	1	1	1	0	0	0	0	1	0	0	0	0	0	0	0	0	0	0	0	0		4
ERBB2	PYROTINIB	1	0	0	0	0	0	0	1	1	0	0	0	0	0	0	0	0	0	0	0	28498781	4
ERBB2	ERLOTINIB	0	0	0	0	1	0	0	1	0	1	0	0	0	0	0	0	0	0	0	0	27900369	4
ERBB2	CRIZOTINIB	0	0	0	0	0	0	0	1	0	0	0	0	0	0	1	0	0	0	0	0	2759547726432100	4
ERBB2	OXALIPLATIN	0	0	0	0	0	0	0	1	0	0	0	0	0	0	0	0	0	0	0	0	2.87849e+23	4
ERBB2	PICTILISIB	0	0	0	0	0	1	0	1	0	0	0	0	0	0	0	0	0	0	0	0	2702085722802530	4
ERBB2	CARBOPLATIN	0	0	0	0	0	1	0	0	0	1	0	0	0	0	0	0	0	0	0	0	3007103929584540	4
ERBB2	GANCOTAMAB	1	1	0	0	0	0	0	1	0	0	0	0	0	0	0	0	0	0	0	0	26759238	4
ERBB2	FLUOROURACIL	0	0	0	0	0	0	0	1	0	0	0	0	0	0	0	0	0	0	0	0	2.87849e+23	4
ERBB2	LEUCOVORIN	0	0	0	0	0	0	0	1	0	0	0	0	0	0	0	0	0	0	0	0	2.87849e+23	4
ERBB2	PILARALISIB	0	0	0	0	0	1	0	1	0	0	0	0	0	0	0	0	0	0	0	0	2394897323204220	4
TOP2A	GENISTEIN	0	0	0	0	1	0	0	0	0	0	0	0	0	0	0	0	0	0	0	0	1.71393e+22	4
STAT5B	DASATINIB	0	0	1	1	0	0	0	0	0	0	0	0	0	0	0	0	0	0	0	0	1743111817020990	4
ATP5F1D	METHOXYFLURANE	0	0	1	1	0	0	0	0	0	0	0	0	0	0	0	0	0	0	0	0	1713928417016420	4
ATP5F1D	SEVOFLURANE	0	0	1	1	0	0	0	0	0	0	0	0	0	0	0	0	0	0	0	0	1713928417016420	4
ATP5F1D	HALOTHANE	0	0	1	1	0	0	0	0	0	0	0	0	0	0	0	0	0	0	0	0	1713928417016420	4
STK11	SELUMETINIB	0	0	0	0	0	1	0	1	0	0	0	0	0	0	0	0	0	0	0	0	2782148922425990	4
TYK2	TOFACITINIB	0	0	0	0	1	0	0	0	1	0	0	0	0	0	0	0	0	0	0	0	1059223526231150	4
S1PR5	OZANIMOD	0	0	0	0	0	0	0	0	1	0	0	0	0	0	0	0	0	0	0	0	2.91257e+23	4
BCL2L11	IMATINIB	0	0	0	0	0	1	0	0	0	1	0	0	0	0	0	0	0	0	0	0	2422382422426420	4
PSMD1	CARFILZOMIB	1	0	0	0	1	0	0	0	0	0	0	0	0	1	0	0	0	0	0	0	24524217	4
PDCD1	CEMIPLIMAB	0	1	0	0	0	0	0	0	1	0	0	0	0	0	0	0	0	0	0	0	2986397929089720	4
LIF	CISPLATIN	0	0	0	0	0	0	1	0	0	0	0	0	0	0	0	0	0	0	0	0	1180002212519010	3
CD247	MUROMONAB-CD3	0	0	1	0	0	0	0	0	0	0	0	0	0	0	0	0	0	0	0	0	25033488861551	3
SSTR3	CHEMBL452157	0	1	0	0	1	0	0	0	0	0	0	0	0	0	0	0	0	0	0	0	21806016	3
PDGFB	SUNITINIB	0	0	0	0	0	1	0	0	0	0	1	0	0	0	0	0	0	0	0	0	29760553	3
CCR2	AZD2423	1	1	0	0	0	0	0	0	1	0	0	0	0	0	0	0	0	0	0	0		3
CCR2	CCX140	1	1	1	0	0	0	0	0	0	0	0	0	0	0	0	0	0	0	0	0		3
CCR2	PLOZALIZUMAB	1	0	1	0	0	0	0	0	1	0	0	0	0	0	0	0	0	0	0	0		3
CCR2	CHEMBL41275	0	0	0	0	1	0	0	0	1	0	0	0	0	0	0	0	0	0	0	0	17715128	3
CNGA1	DEQUALINIUM	0	1	0	0	0	0	0	0	1	0	0	0	0	0	0	0	0	0	0	0	12508052	3
NFKB1	ANDROGRAPHOLIDE	0	0	1	0	1	0	0	0	0	0	0	0	0	0	0	0	0	0	0	0	25615020	3
IL2	CYCLOSPORINE	0	0	0	0	0	0	1	0	0	0	0	0	0	0	0	0	0	0	0	0	121357067529939	3
IL2	QUININE	0	0	0	0	0	0	1	0	0	0	0	0	0	0	0	0	0	0	0	0	34978882846451	3
IL7R	RUXOLITINIB	0	0	0	0	0	0	0	0	0	0	0	0	0	0	1	0	0	0	0	0	2289784722955920	3
PTGER4	GRAPIPRANT	0	0	0	0	0	0	0	0	1	0	0	0	0	0	0	0	0	0	0	0	2175287629067170	3
PTPRC	ADALIMUMAB	0	0	0	0	0	0	0	0	0	1	0	0	0	0	0	0	0	0	0	0	2030987423007920	3
PTPRC	ETANERCEPT	0	0	0	0	0	0	0	0	0	1	0	0	0	0	0	0	0	0	0	0	2030987423007920	3
PTPRC	INFLIXIMAB	0	0	0	0	0	0	0	0	0	1	0	0	0	0	0	0	0	0	0	0	2030987423007920	3
SLC22A5	IMATINIB	0	0	0	0	0	0	0	0	0	1	0	0	0	0	0	0	0	0	0	0	2876237123127910	3
IL5	RESLIZUMAB	1	1	1	0	0	0	0	0	0	0	0	0	0	0	0	0	0	0	0	0		3
IL5	METHYLPREDNISOLONE	0	0	0	0	0	0	1	0	0	0	0	0	0	0	0	0	0	0	0	0	155170110836352	3
NQO2	CYCLOPHOSPHAMIDE	0	0	0	0	0	0	0	0	0	1	0	0	0	0	0	0	0	0	0	0	2993834421946890	3
NQO2	DOXORUBICIN	0	0	0	0	0	0	0	0	0	1	0	0	0	0	0	0	0	0	0	0	2993834421946890	3
PSORS1C1	ALLOPURINOL	0	0	0	0	0	0	0	0	0	1	0	0	0	0	0	0	0	0	0	0	2180139429193000	3
TNF	PLACULUMAB	1	1	1	0	0	0	0	0	0	0	0	0	0	0	0	0	0	0	0	0		3
TNF	CEFOTAXIME	0	0	0	0	0	0	1	0	0	0	0	0	0	0	0	0	0	0	0	0	835490710989981	3
TNF	RISPERIDONE	0	0	0	0	0	0	1	0	0	0	0	0	0	0	0	0	0	0	0	0	1556777011545240	3
TNF	INSULIN	0	0	0	0	0	0	1	0	0	0	0	0	0	0	0	0	0	0	0	0	161255269287059	3
HLA-DQB1	AMOXICILLIN	0	0	0	0	0	0	0	0	0	1	0	0	0	0	0	0	0	0	0	0	1053588230664870	3
HLA-DQB1	CLAVULANIC ACID	0	0	0	0	0	0	0	0	0	1	0	0	0	0	0	0	0	0	0	0	1053588230664870	3
HSP90AB1	GANETESPIB	1	0	1	0	0	0	0	0	0	0	0	0	0	1	0	0	0	0	0	0		3
HSP90AB1	ALVESPIMYCIN	0	0	1	0	1	0	0	0	0	0	0	0	0	0	0	0	0	0	0	0	17603540	3
HSP90AB1	GEDUNIN	0	0	0	0	1	0	0	0	0	0	0	0	0	0	0	0	0	0	0	0	2575629921129980	3
HSP90AB1	CELASTROL	0	0	0	0	1	0	0	0	0	0	0	0	0	0	0	0	0	0	0	0	2575629921129980	3
SLC29A1	ALCOHOL	0	0	0	0	0	0	1	0	0	0	0	0	0	0	0	0	0	0	0	0	1525858619298320	3
TNFAIP3	USTEKINUMAB	0	0	0	0	0	0	0	0	0	1	0	0	0	0	0	0	0	0	0	0	2756408223521140	3
UST	NORTRIPTYLINE	0	0	0	0	0	0	0	0	0	1	0	0	0	0	0	0	0	0	0	0	2036031525916520	3
DAGLB	ORLISTAT	0	0	0	0	1	0	0	0	1	0	0	0	0	0	0	0	0	0	0	0	18657971	3
RAC1	VEMURAFENIB	0	0	0	0	0	1	0	0	0	0	0	0	0	0	0	0	0	0	0	0	2505611924265150	3
RAC1	DABRAFENIB	0	0	0	0	0	1	0	0	0	0	0	0	0	0	0	0	0	0	0	0	2505611924265150	3
MYC	ACIVICIN	0	0	0	0	0	0	1	0	0	0	0	0	0	0	0	0	0	0	0	0	15965741997162	3
MYC	ESTRONE	0	0	0	0	0	0	1	0	0	0	0	0	0	0	0	0	0	0	0	0	1252097012567850	3
MYC	THYROTROPIN	0	0	0	0	0	0	1	0	0	0	0	0	0	0	0	0	0	0	0	0	31250353726540	3
MYC	CALCITRIOL	0	0	0	0	0	0	1	0	0	0	0	0	0	0	0	0	0	0	0	0	849020015598784	3
TG	PREDNISOLONE	0	0	0	0	0	0	1	0	0	0	0	0	0	0	0	0	0	0	0	0	34277928636270	3
TG	ROSIGLITAZONE	0	0	0	0	0	0	1	0	0	0	0	0	0	0	0	0	0	0	0	0	1564077616921270	3
IL2RA	ALDESLEUKIN	0	0	1	0	0	0	1	0	0	0	0	0	0	0	0	0	0	0	0	0	9167045	3
PLAU	UPAMOSTAT	0	1	1	0	0	0	0	0	1	0	0	0	0	0	0	0	0	0	0	0		3
NFKB2	PARTHENOLIDE	0	1	0	0	1	0	0	0	0	0	0	0	0	0	0	0	0	0	0	0	25190466	3
IGF2	GANITUMAB	0	0	0	0	0	1	0	0	0	0	0	0	0	0	0	0	0	0	0	0	2374107124727320	3
PTGDR2	QAV680	1	1	0	0	0	0	0	0	1	0	0	0	0	0	0	0	0	0	0	0		3
PTGDR2	ARRY-502	1	1	0	0	0	0	0	0	1	0	0	0	0	0	0	0	0	0	0	0		3
PTGDR2	VIDUPIPRANT	1	0	0	0	1	0	0	0	1	0	0	0	0	0	0	0	0	0	0	0		3
PTGDR2	AM-211	1	1	1	0	0	0	0	0	0	0	0	0	0	0	0	0	0	0	0	0		3
PTGDR2	RAMATROBAN	0	1	0	0	0	0	0	0	1	0	0	0	0	0	0	0	0	0	0	0	16256979	3
PTGDR2	AM-461	1	1	0	0	0	0	0	0	1	0	0	0	0	0	0	0	0	0	0	0		3
PTGDR2	AZD1981	1	1	0	0	0	0	0	0	1	0	0	0	0	0	0	0	0	0	0	0		3
PTGDR2	SETIPIPRANT	1	1	0	0	0	0	0	0	1	0	0	0	0	0	0	0	0	0	0	0		3
ESRRA	GENISTEIN	0	0	0	0	0	0	0	0	1	0	0	0	0	0	0	0	0	0	0	0	1463887015955690	3
TNFRSF9	URELUMAB	1	1	0	0	0	0	0	0	1	0	0	0	0	0	0	0	0	0	0	0		3
HDAC7	TACEDINALINE	1	0	0	0	1	0	0	0	0	0	0	0	0	0	0	0	0	0	0	0	18692397	3
HDAC7	SCRIPTAID	0	0	0	0	1	0	0	0	1	0	0	0	0	0	0	0	0	0	0	0	19966789	3
HDAC7	GIVINOSTAT	0	0	1	0	0	0	0	0	1	0	0	0	0	0	0	0	1	0	0	0		3
CDK2	RGB-286638	1	1	0	0	0	0	0	0	1	0	0	0	0	0	0	0	0	0	0	0		3
ERBB3	MM-111	0	0	1	0	0	0	0	0	1	0	0	0	0	1	0	0	0	0	0	0		3
ERBB3	SELUMETINIB	0	0	0	0	0	1	0	0	0	0	0	0	0	0	0	0	0	0	0	0	2595264824685130	3
IL23A	GUSELKUMAB	1	1	0	0	0	0	0	0	0	0	0	0	0	0	0	0	0	0	0	0	26714681	3
SH2B3	RUXOLITINIB	0	0	0	0	0	0	0	0	0	0	0	0	0	0	1	0	0	0	0	0	2289784722955920	3
TNFSF11	LENALIDOMIDE	0	0	1	0	0	0	0	0	0	0	0	0	0	0	0	0	0	0	0	0	1736907619370680	3
GALC	BUSULFAN	0	0	0	0	0	0	1	0	0	0	0	0	0	0	0	0	0	0	0	0	20344808101401	3
RORA	MELATONIN	0	0	0	0	0	0	1	0	0	0	0	0	0	0	0	0	0	0	0	0	870267812595746	3
PRKCB	RUBOXISTAURIN	1	0	1	0	0	0	0	0	1	0	0	0	0	0	0	0	0	0	0	0		3
PRKCB	BRYOSTATIN	0	0	1	0	1	0	0	0	0	0	0	0	0	0	0	0	0	0	0	0	22579485	3
ERBB2	MUBRITINIB	1	0	0	0	0	0	0	0	1	0	0	0	0	1	0	0	0	0	0	0		3
ERBB2	CP-724714	1	1	0	0	0	0	0	0	1	0	0	0	0	0	0	0	0	0	0	0		3
ERBB2	VINORELBINE	0	0	0	0	0	0	0	1	0	0	0	0	0	0	0	0	0	0	0	0	2799245124742730	3
ERBB2	ABEMACICLIB	0	0	0	0	0	0	0	0	0	1	0	0	0	0	1	0	0	1	0	0		3
ERBB2	TRASTUZUMAB DUOCARMAZINE	0	0	0	0	0	0	0	1	0	0	0	0	0	0	0	0	0	0	0	0	2558949327256370	3
ERBB2	BEVACIZUMAB	0	0	0	0	0	0	0	1	0	0	0	0	0	0	0	0	0	0	0	0	2394035626432100	3
ERBB2	OSIMERTINIB	0	0	0	0	0	0	0	1	0	0	0	0	0	0	1	0	0	0	0	0	27252416	3
ERBB2	HERCEPTIN	0	0	0	0	0	0	1	0	0	0	0	0	0	0	0	0	0	0	0	0	1721600215581050	3
ERBB2	TASELISIB	0	0	0	0	0	0	0	1	0	0	0	0	0	0	0	0	0	0	0	0	2517276226333380	3
ERBB2	LETROZOLE	0	0	0	0	0	0	0	1	0	0	0	0	0	0	1	0	0	0	0	0	19786658	3
ERBB2	GEDATOLISIB	0	0	0	0	0	0	0	1	0	0	0	0	0	0	0	0	0	0	0	0	1731427621325070	3
ERBB2	OLAPARIB	0	0	0	0	0	0	0	1	0	1	0	0	0	0	0	0	0	1	0	0		3
ERBB2	GEMCITABINE	0	0	0	0	0	0	1	1	0	0	0	0	0	0	0	0	0	0	0	0	15581051	3
ERBB2	FULVESTRANT	0	0	0	0	0	0	0	0	0	1	0	0	0	0	1	0	0	1	0	0		3
RARA	COLCHICINE	0	0	0	0	0	0	1	0	0	0	0	0	0	0	0	0	0	0	0	0	966763817291686	3
RARA	FENRETINIDE	0	0	1	0	0	0	1	0	0	0	0	0	0	0	0	0	0	0	0	0	10328240	3
TOP2A	ALDOXORUBICIN	1	0	1	0	0	0	0	0	0	0	0	0	0	0	0	0	0	0	0	0	25312684	3
TOP2A	ELLIPTECINE	0	0	0	0	1	0	0	0	0	0	0	0	0	0	0	0	0	0	0	0	1881604519783440	3
TOP2A	QUERCETIN	0	0	0	0	1	0	0	0	0	0	0	0	0	0	0	0	0	0	0	0	87591707769390	3
TOP2A	MYRICETIN	0	0	0	0	1	0	0	0	0	0	0	0	0	0	0	0	0	0	0	0	87591707769390	3
STAT5A	TOFACITINIB	0	0	0	0	1	0	0	0	0	0	0	0	0	0	0	0	0	0	0	0	1459318219053750	3
STAT3	AZD-1480	0	0	0	0	1	0	0	0	0	0	0	0	0	0	0	0	0	0	0	0	2113824624978110	3
ATP5F1D	ENFLURANE	0	0	1	1	0	0	0	0	0	0	0	0	0	0	0	0	0	0	0	0	8214757	3
STK11	PHENFORMIN	0	0	0	0	0	0	0	1	0	0	0	0	0	0	1	0	0	0	0	0	26574479	3
STK11	DOCETAXEL	0	0	0	0	0	1	0	0	0	0	0	0	0	0	1	0	0	0	0	0	22425996	3
STK11	METFORMIN	0	0	0	0	0	0	0	1	0	0	0	0	0	0	0	0	0	0	0	0	1706255818006820	3
ELANE	NIFEDIPINE	0	0	0	0	0	0	1	0	0	0	0	0	0	0	0	0	0	0	0	0	97967818833599	3
ICAM1	BI-505	1	1	1	0	0	0	0	0	0	0	0	0	0	0	0	0	0	0	0	0		3
KEAP1	DIMETHYL FUMARATE	1	0	0	0	1	0	0	0	0	0	0	0	0	0	0	0	0	0	0	0	23647822	3
S1PR5	FINGOLIMOD	0	0	0	0	0	0	0	0	1	0	0	0	0	0	0	0	0	0	0	0	2357945623579450	3
PIK3R2	GEDATOLISIB	1	0	0	0	0	0	0	0	0	0	1	0	0	1	0	0	0	0	0	0		3
PIK3R2	DACTOLISIB	1	0	0	0	0	0	0	0	0	0	1	0	0	1	0	0	0	0	0	0		3
PIK3R2	SONOLISIB	1	0	0	0	0	0	0	0	0	0	1	0	0	1	0	0	0	0	0	0		3
PIK3R2	COPANLISIB	1	0	0	0	0	0	0	0	0	0	1	0	0	1	0	0	0	0	0	0		3
BAX	OXALIPLATIN	0	0	0	0	0	0	1	0	0	0	0	0	0	0	0	0	0	0	0	0	1554597514985450	3
BAX	CIPROFLOXACIN	0	0	0	0	0	0	1	0	0	0	0	0	0	0	0	0	0	0	0	0	1074171312632060	3
BAX	MITOXANTRONE	0	0	0	0	0	0	1	0	0	0	0	0	0	0	0	0	0	0	0	0	1476752511839660	3
BAX	CARVEDILOL	0	0	0	0	0	0	1	0	0	0	0	0	0	0	0	0	0	0	0	0	1675952012973920	3
OXER1	5-OXO-ETE	0	0	0	0	1	0	0	0	1	0	0	0	0	0	0	0	0	0	0	0	21377873	3
ACYP2	CISPLATIN	0	0	0	0	0	0	0	0	0	1	0	0	0	0	0	0	0	0	0	0	2692827031666710	3
ITGA4	VEDOLIZUMAB	1	0	1	0	0	0	0	0	0	0	0	0	0	0	0	0	0	0	0	0	19509315	3
APH1A	SEMAGACESTAT	1	0	0	0	1	0	0	0	0	0	0	0	0	0	0	0	0	0	0	0	19443228	3
APH1A	CHEMBL392068	0	0	0	0	1	0	0	0	0	0	0	0	0	0	0	0	0	0	0	0	2318150219443220	3
STAT4	ALDESLEUKIN	0	0	0	0	0	0	1	0	0	0	0	0	0	0	0	0	0	0	0	0	1141800116493030	3
CTLA4	SIROLIMUS	0	0	0	0	0	0	1	0	0	0	0	0	0	0	0	0	0	0	0	0	798290711698435	3
IL6R	SATRALIZUMAB	1	1	0	0	0	0	0	0	0	0	0	0	0	0	0	0	0	0	0	0	23575266	3
GPBAR1	TAUROLITHOCHOLIC ACID	0	0	0	0	1	0	0	0	0	0	0	0	0	0	0	0	0	0	0	0	2516283725247750	3
GPBAR1	CHENODIOL	0	0	0	0	1	0	0	0	0	0	0	0	0	0	0	0	0	0	0	0	2516283717963370	3
CHRNB2	DEXMECAMYLAMINE	1	1	1	0	0	0	0	0	0	0	0	0	0	0	0	0	0	0	0	0		3
PDCD1	PIDILIZUMAB	0	0	1	0	0	0	0	0	0	0	0	1	0	1	0	0	0	0	0	0		3
SLC12A5	BUMETANIDE	0	0	1	1	0	0	0	0	0	0	0	0	0	0	0	0	0	0	0	0	10793196	3
PTPN1	TRODUSQUEMINE	0	1	1	0	0	0	0	0	1	0	0	0	0	0	0	0	0	0	0	0		3
OPRL1	CHEMBL140979	0	0	0	0	1	0	0	0	1	0	0	0	0	0	0	0	0	0	0	0	21330016	3
NECTIN4	ENFORTUMAB VEDOTIN	0	1	1	0	0	0	0	0	0	0	0	0	0	0	0	0	1	0	0	0		3
GART	LOMETREXOL	0	0	0	0	1	0	0	0	0	0	0	0	0	0	0	0	0	0	0	0	22243528	2
RUNX1	CYTARABINE	0	0	0	0	0	1	0	0	0	0	0	0	0	0	0	0	0	0	0	0	21343560	2
RUNX1	IMATINIB	0	0	0	0	0	0	1	0	0	0	0	0	0	0	0	0	0	0	0	0	15650049	2
RUNX1	DOXORUBICIN	0	0	0	0	0	0	0	1	0	0	0	0	0	0	0	0	0	0	0	0	26552700	2
LIF	MIFEPRISTONE	0	0	0	0	0	0	1	0	0	0	0	0	0	0	0	0	0	0	0	0	10717784	2
LIF	PACLITAXEL	0	0	0	0	0	0	1	0	0	0	0	0	0	0	0	0	0	0	0	0	11800022	2
LIF	ESTRADIOL	0	0	0	0	0	0	1	0	0	0	0	0	0	0	0	0	0	0	0	0	10508216	2
LIF	CAPSAICIN	0	0	0	0	0	0	1	0	0	0	0	0	0	0	0	0	0	0	0	0	9138695	2
LIF	DEXAMETHASONE	0	0	0	0	0	0	1	0	0	0	0	0	0	0	0	0	0	0	0	0	8392465	2
LIF	THROMBIN	0	0	0	0	0	0	1	0	0	0	0	0	0	0	0	0	0	0	0	0	7007650	2
LIF	DAIDZEIN	0	0	0	0	0	0	1	0	0	0	0	0	0	0	0	0	0	0	0	0	10508216	2
LIF	SIMVASTATIN	0	0	0	0	0	0	1	0	0	0	0	0	0	0	0	0	0	0	0	0	16797728	2
LIF	BUPIVACAINE	0	0	0	0	0	0	1	0	0	0	0	0	0	0	0	0	0	0	0	0	10838161	2
LIF	AZACITIDINE	0	0	0	0	0	0	1	0	0	0	0	0	0	0	0	0	0	0	0	0	12543079	2
CD247	AZACITIDINE	0	0	0	0	0	0	1	0	0	0	0	0	0	0	0	0	0	0	0	0	15795105	2
GPA33	KRN-330	0	1	1	0	0	0	0	0	0	0	0	0	0	0	0	0	0	0	0	0		2
RAC2	IDARUBICIN	0	0	0	0	0	0	0	0	0	1	0	0	0	0	0	0	0	0	0	0	28485375	2
RAC2	DOXORUBICIN	0	0	0	0	0	0	0	0	0	1	0	0	0	0	0	0	0	0	0	0	21048526	2
SSTR3	VAPREOTIDE	1	0	0	0	0	0	0	0	1	0	0	0	0	0	0	0	0	0	0	0		2
RCSD1	IMATINIB	0	0	0	0	0	1	0	0	0	0	0	0	0	0	0	0	0	0	0	0	27125982	2
PDGFB	PEGPLERANIB SODIUM	1	1	0	0	0	0	0	0	0	0	0	0	0	0	0	0	0	0	0	0		2
CCR2	PF-04634817	1	0	0	0	0	0	0	0	1	0	0	0	0	0	0	0	0	0	0	0		2
CCR2	CENICRIVIROC	1	1	0	0	0	0	0	0	0	0	0	0	0	0	0	0	0	0	0	0		2
CCR2	MORPHINE	0	0	0	0	0	0	1	0	0	0	0	0	0	0	0	0	0	0	0	0	16831471	2
CCR2	SIMVASTATIN	0	0	0	0	0	0	1	0	0	0	0	0	0	0	0	0	0	0	0	0	15781755	2
CCR2	PLERIXAFOR	0	0	0	0	1	0	0	0	0	0	0	0	0	0	0	0	0	0	0	0	17715128	2
CCR5	INCB-9471	1	1	0	0	0	0	0	0	0	0	0	0	0	0	0	0	0	0	0	0		2
CCR5	AZD5672	1	0	0	0	0	0	0	0	1	0	0	0	0	0	0	0	0	0	0	0		2
ABHD6	ORLISTAT	0	0	0	0	1	0	0	0	0	0	0	0	0	0	0	0	0	0	0	0	26344596	2
BCL6	FENRETINIDE	0	0	0	0	0	0	1	0	0	0	0	0	0	0	0	0	0	0	0	0	11027625	2
FGFRL1	BRIVANIB	0	0	0	0	0	0	0	0	0	1	0	0	0	0	0	0	0	0	0	0	20124951	2
GAK	CHEMBL261454	0	0	0	0	1	0	0	0	0	0	0	0	0	0	0	0	0	0	0	0	19035792	2
GAK	SB-202190	0	0	0	0	1	0	0	0	0	0	0	0	0	0	0	0	0	0	0	0	22951114	2
TBC1D1	CLOZAPINE	0	0	0	0	0	0	0	0	0	1	0	0	0	0	0	0	0	0	0	0	23364847	2
TBC1D1	OLANZAPINE	0	0	0	0	0	0	0	0	0	1	0	0	0	0	0	0	0	0	0	0	23364847	2
TXK	HESPERADIN	0	0	0	0	1	0	0	0	0	0	0	0	0	0	0	0	0	0	0	0	19035792	2
PPP3CA	VOCLOSPORIN	0	1	1	0	0	0	0	0	0	0	0	0	0	0	0	0	0	0	0	0		2
SLC39A8	ALCOHOL	0	0	0	0	0	0	0	0	0	1	0	0	0	0	0	0	0	0	0	0	32451486	2
NFKB1	KAEMPFERIDE	0	0	0	0	1	0	0	0	0	0	0	0	0	0	0	0	0	0	0	0	25190466	2
NFKB1	DEHYDROXYMETHYLEPOXYQUINOMICIN	0	0	0	0	1	0	0	0	0	0	0	0	0	0	0	0	0	0	0	0	18729348	2
NFKB1	KAEMPFEROL	0	0	0	0	1	0	0	0	0	0	0	0	0	0	0	0	0	0	0	0	25190466	2
NFKB1	DIOSMETIN	0	0	0	0	1	0	0	0	0	0	0	0	0	0	0	0	0	0	0	0	25190466	2
NFKB1	QUERCETIN	0	0	0	0	1	0	0	0	0	0	0	0	0	0	0	0	0	0	0	0	25190466	2
NFKB1	RUTIN	0	0	0	0	1	0	0	0	0	0	0	0	0	0	0	0	0	0	0	0	25496805	2
NFKB1	LUTEOLIN	0	0	0	0	1	0	0	0	0	0	0	0	0	0	0	0	0	0	0	0	25190466	2
NFKB1	E-FLUPENTIXOL	0	0	0	0	0	0	0	0	0	1	0	0	0	0	0	0	0	0	0	0	27992301	2
NFKB1	TAMARIXETIN	0	0	0	0	1	0	0	0	0	0	0	0	0	0	0	0	0	0	0	0	25190466	2
NFKB1	PARTHENOLIDE	0	0	0	0	1	0	0	0	0	0	0	0	0	0	0	0	0	0	0	0	25190466	2
NFKB1	ISORHAMNETIN	0	0	0	0	1	0	0	0	0	0	0	0	0	0	0	0	0	0	0	0	25190466	2
NFKB1	GOSSYPETIN	0	0	0	0	1	0	0	0	0	0	0	0	0	0	0	0	0	0	0	0	25190466	2
NFKB1	SORBINIL	0	0	0	0	1	0	0	0	0	0	0	0	0	0	0	0	0	0	0	0	24819954	2
NFKB1	ARTESUNATE	0	0	0	0	1	0	0	0	0	0	0	0	0	0	0	0	0	0	0	0	25074847	2
NFKB1	ACACETIN	0	0	0	0	1	0	0	0	0	0	0	0	0	0	0	0	0	0	0	0	25190466	2
NFKB1	CHRYSOERIOL	0	0	0	0	1	0	0	0	0	0	0	0	0	0	0	0	0	0	0	0	25190466	2
NFKB1	APIGENIN	0	0	0	0	1	0	0	0	0	0	0	0	0	0	0	0	0	0	0	0	25190466	2
NFKB1	QUERCETAGETIN	0	0	0	0	1	0	0	0	0	0	0	0	0	0	0	0	0	0	0	0	25190466	2
IL2	IMIPENEM	0	0	0	0	0	0	1	0	0	0	0	0	0	0	0	0	0	0	0	0	7796708	2
IL2	PYRIMETHAMINE	0	0	0	0	0	0	1	0	0	0	0	0	0	0	0	0	0	0	0	0	3497888	2
IL2	AZIRIDINE	0	0	0	0	0	0	1	0	0	0	0	0	0	0	0	0	0	0	0	0	17197726	2
IL2	ROXITHROMYCIN	0	0	0	0	0	0	1	0	0	0	0	0	0	0	0	0	0	0	0	0	1513198	2
IL2	GENTAMICIN	0	0	0	0	0	0	1	0	0	0	0	0	0	0	0	0	0	0	0	0	1598936	2
IL2	PROCHLORPERAZINE	0	0	0	0	0	0	1	0	0	0	0	0	0	0	0	0	0	0	0	0	8564607	2
IL2	HALOFUGINONE	0	0	0	0	0	0	1	0	0	0	0	0	0	0	0	0	0	0	0	0	15177499	2
IL2	CLOZAPINE	0	0	0	0	0	0	1	0	0	0	0	0	0	0	0	0	0	0	0	0	15053234	2
IL2	METOCLOPRAMIDE	0	0	0	0	0	0	1	0	0	0	0	0	0	0	0	0	0	0	0	0	8191163	2
IL2	TROPISETRON	0	0	0	0	0	0	1	0	0	0	0	0	0	0	0	0	0	0	0	0	11053919	2
IL2	TICARCILLIN	0	0	0	0	0	0	1	0	0	0	0	0	0	0	0	0	0	0	0	0	1598936	2
IL2	PEFLOXACIN	0	0	0	0	0	0	1	0	0	0	0	0	0	0	0	0	0	0	0	0	9869897	2
IL2	GARLIC	0	0	0	0	0	0	1	0	0	0	0	0	0	0	0	0	0	0	0	0	10737264	2
IL2	ACETAMINOPHEN	0	0	0	0	0	0	1	0	0	0	0	0	0	0	0	0	0	0	0	0	11053919	2
IL2	BECLOMETHASONE	0	0	0	0	0	0	1	0	0	0	0	0	0	0	0	0	0	0	0	0	8071057	2
IL2	METHOTREXATE	0	0	0	0	0	0	1	0	0	0	0	0	0	0	0	0	0	0	0	0	9669212	2
IL2	PERFOSFAMIDE	0	0	0	0	0	0	1	0	0	0	0	0	0	0	0	0	0	0	0	0	3497116	2
IL2	GLYBURIDE	0	0	0	0	0	0	1	0	0	0	0	0	0	0	0	0	0	0	0	0	10466081	2
IL2	RITUXIMAB	0	0	0	0	0	0	0	0	0	1	0	0	0	0	0	0	0	0	0	0	23645042	2
IL2	PRASTERONE	0	0	0	0	0	0	1	0	0	0	0	0	0	0	0	0	0	0	0	0	16091484	2
IL2	CEFEPIME	0	0	0	0	0	0	1	0	0	0	0	0	0	0	0	0	0	0	0	0	8106902	2
IL2	OFLOXACIN	0	0	0	0	0	0	1	0	0	0	0	0	0	0	0	0	0	0	0	0	2115511	2
IL2	METYROSINE	0	0	0	0	0	0	1	0	0	0	0	0	0	0	0	0	0	0	0	0	15456539	2
IL2	ITRACONAZOLE	0	0	0	0	0	0	1	0	0	0	0	0	0	0	0	0	0	0	0	0	1330944	2
IL2	PRAVASTATIN	0	0	0	0	0	0	1	0	0	0	0	0	0	0	0	0	0	0	0	0	16051523	2
IL2	CALCITRIOL	0	0	0	0	0	0	1	0	0	0	0	0	0	0	0	0	0	0	0	0	3492067	2
IL2	BROMOCRIPTINE	0	0	0	0	0	0	1	0	0	0	0	0	0	0	0	0	0	0	0	0	8191163	2
SPATA5	PACLITAXEL	0	0	0	0	0	0	0	0	0	1	0	0	0	0	0	0	0	0	0	0	24444404	2
PRLR	ANDROSTANOLONE	0	0	0	0	0	0	1	0	0	0	0	0	0	0	0	0	0	0	0	0	1544711	2
PTGER4	BETAMETHASONE	0	0	0	0	0	0	1	0	0	0	0	0	0	0	0	0	0	0	0	0	17515865	2
PTGER4	CELECOXIB	0	0	0	0	0	0	0	0	0	1	0	0	0	0	0	0	0	0	0	0	23778325	2
PTGER4	IBUPROFEN	0	0	0	0	0	0	1	0	0	0	0	0	0	0	0	0	0	0	0	0	9118476	2
PTGER4	STREPTOZOCIN	0	0	0	0	0	0	1	0	0	0	0	0	0	0	0	0	0	0	0	0	16954344	2
IL6ST	BAZEDOXIFENE	0	0	0	0	1	0	0	0	0	0	0	0	0	0	0	0	0	0	0	0	24456369	2
IL6ST	RALOXIFENE	0	0	0	0	1	0	0	0	0	0	0	0	0	0	0	0	0	0	0	0	24456369	2
PTPRC	PREDNISONE	0	0	0	0	0	0	1	0	0	0	0	0	0	0	0	0	0	0	0	0	17063711	2
PTPRC	FLUOROURACIL	0	0	0	0	0	0	1	0	0	0	0	0	0	0	0	0	0	0	0	0	15206578	2
PTPRC	HYDROGEN PEROXIDE	0	0	0	0	1	0	0	0	0	0	0	0	0	0	0	0	0	0	0	0	15012988	2
PTPRC	HYDROCORTISONE	0	0	0	0	0	0	1	0	0	0	0	0	0	0	0	0	0	0	0	0	10731548	2
PTPRC	CHEMBL204543	0	0	0	0	1	0	0	0	0	0	0	0	0	0	0	0	0	0	0	0	24997687	2
PTPRC	EPOETIN BETA	0	0	0	0	0	0	1	0	0	0	0	0	0	0	0	0	0	0	0	0	1713254	2
PTPRC	ALENDRONIC ACID	0	0	0	0	1	0	0	0	0	0	0	0	0	0	0	0	0	0	0	0	15012988	2
PTPRC	ESTRADIOL	0	0	0	0	0	0	1	0	0	0	0	0	0	0	0	0	0	0	0	0	10325261	2
CAST	ANDROSTANOLONE	0	0	0	0	0	0	1	0	0	0	0	0	0	0	0	0	0	0	0	0	12646165	2
CAST	STAUROSPORINE	0	0	0	0	0	0	1	0	0	0	0	0	0	0	0	0	0	0	0	0	12576481	2
CAST	EPINEPHRINE	0	0	0	0	0	0	1	0	0	0	0	0	0	0	0	0	0	0	0	0	10863002	2
CAST	THROMBIN	0	0	0	0	0	0	1	0	0	0	0	0	0	0	0	0	0	0	0	0	8358337	2
IRF1-AS1	HYDROCHLOROTHIAZIDE	0	0	0	0	0	0	0	0	0	1	0	0	0	0	0	0	0	0	0	0	31327267	2
SLC22A5	CARNITINE	0	0	0	0	1	0	0	0	0	0	0	0	0	0	0	0	0	0	0	0	21422191	2
IL5	MUPLESTIM	0	0	0	0	0	0	1	0	0	0	0	0	0	0	0	0	0	0	0	0	8485042	2
IL5	CYCLOPHOSPHAMIDE	0	0	0	0	0	0	1	0	0	0	0	0	0	0	0	0	0	0	0	0	11006010	2
IL5	BENRALIZUMAB	0	1	0	0	0	0	0	0	0	0	0	0	0	0	0	0	0	0	0	0	22136436	2
IL5	CYCLOSPORINE	0	0	0	0	0	0	1	0	0	0	0	0	0	0	0	0	0	0	0	0	9237106	2
RUNX3	LEUCOVORIN	0	0	0	0	0	0	1	0	0	0	0	0	0	0	0	0	0	0	0	0	17372756	2
RUNX3	IRINOTECAN	0	0	0	0	0	0	1	0	0	0	0	0	0	0	0	0	0	0	0	0	17372756	2
DUSP1	HYDROXYUREA	0	0	0	0	0	0	1	0	0	0	0	0	0	0	0	0	0	0	0	0	15856297	2
DUSP1	ALBUTEROL	0	0	0	0	0	0	0	0	0	1	0	0	0	0	0	0	0	0	0	0	20673984	2
DUSP1	VASOPRESSIN	0	0	0	0	0	0	1	0	0	0	0	0	0	0	0	0	0	0	0	0	9231829	2
F12	BORTEZOMIB	0	0	0	0	1	0	0	0	0	0	0	0	0	0	0	0	0	0	0	0	20875739	2
NQO2	CHEMBL1287866	0	0	0	0	1	0	0	0	0	0	0	0	0	0	0	0	0	0	0	0	21074425	2
NQO2	DABIGATRAN	0	0	0	0	1	0	0	0	0	0	0	0	0	0	0	0	0	0	0	0	22494098	2
NQO2	IMATINIB	0	0	0	0	1	0	0	0	0	0	0	0	0	0	0	0	0	0	0	0	22494098	2
NQO2	CHEMBL1288253	0	0	0	0	1	0	0	0	0	0	0	0	0	0	0	0	0	0	0	0	21074425	2
NQO2	CHEMBL476968	0	0	0	0	1	0	0	0	0	0	0	0	0	0	0	0	0	0	0	0	21074425	2
NQO2	CHEMBL1983317	0	0	0	0	1	0	0	0	0	0	0	0	0	0	0	0	0	0	0	0	21074425	2
NQO2	CHEMBL1288281	0	0	0	0	1	0	0	0	0	0	0	0	0	0	0	0	0	0	0	0	21074425	2
NQO2	CHEMBL1287895	0	0	0	0	1	0	0	0	0	0	0	0	0	0	0	0	0	0	0	0	21074425	2
NQO2	CHEMBL1287867	0	0	0	0	1	0	0	0	0	0	0	0	0	0	0	0	0	0	0	0	21074425	2
NQO2	MELATONIN	0	1	0	0	0	0	0	0	0	0	0	0	0	0	0	0	0	0	0	0	19463840	2
RIPK1	RESVERATROL	0	0	0	0	0	0	1	0	0	0	0	0	0	0	0	0	0	0	0	0	16116226	2
MAPKAPK2	SB-203580	0	0	0	0	1	0	0	0	0	0	0	0	0	0	0	0	0	0	0	0	17964780	2
MAPKAPK2	THEOPHYLLINE	0	0	0	0	0	0	1	0	0	0	0	0	0	0	0	0	0	0	0	0	10666409	2
IL10	TACROLIMUS	0	0	0	0	0	0	0	0	0	1	0	0	0	0	0	0	0	0	0	0	21359536	2
IL10	EFAVIRENZ	0	0	0	0	0	0	0	0	0	1	0	0	0	0	0	0	0	0	0	0	24819158	2
IL10	ACYCLOVIR	0	0	0	0	0	0	1	0	0	0	0	0	0	0	0	0	0	0	0	0	16961277	2
IL10	ZIDOVUDINE	0	0	0	0	0	0	1	0	0	0	0	0	0	0	0	0	0	0	0	0	10433557	2
IL10	MESALAMINE	0	0	0	0	0	0	1	0	0	0	0	0	0	0	0	0	0	0	0	0	15887108	2
IL10	RITUXIMAB	0	0	0	0	0	0	0	0	0	1	0	0	0	0	0	0	0	0	0	0	26384320	2
IL10	RABEPRAZOLE	0	0	0	0	0	0	1	0	0	0	0	0	0	0	0	0	0	0	0	0	16815316	2
IL10	CYCLOSPORINE	0	0	0	0	0	0	0	0	0	1	0	0	0	0	0	0	0	0	0	0	18444945	2
IL10	CLARITHROMYCIN	0	0	0	0	0	0	1	0	0	0	0	0	0	0	0	0	0	0	0	0	16815316	2
IL10	LISOFYLLINE	0	0	0	0	0	0	1	0	0	0	0	0	0	0	0	0	0	0	0	0	9227316	2
IL10	TRETINOIN	0	0	0	0	0	0	1	0	0	0	0	0	0	0	0	0	0	0	0	0	8982293	2
IL10	AMOXICILLIN	0	0	0	0	0	0	1	0	0	0	0	0	0	0	0	0	0	0	0	0	16815316	2
IL10	ROFECOXIB	0	0	0	0	0	0	1	0	0	0	0	0	0	0	0	0	0	0	0	0	15613743	2
CCHCR1	NEVIRAPINE	0	0	0	0	0	0	0	0	0	1	0	0	0	0	0	0	0	0	0	0	21810746	2
POU5F1	ALLOPURINOL	0	0	0	0	0	0	0	0	0	1	0	0	0	0	0	0	0	0	0	0	21801394	2
POU5F1	ALCOHOL	0	0	0	0	0	0	1	0	0	0	0	0	0	0	0	0	0	0	0	0	16112835	2
PSORS1C1	GEMCITABINE	0	0	0	0	0	0	0	0	0	1	0	0	0	0	0	0	0	0	0	0	31616045	2
PSORS1C1	CARBOPLATIN	0	0	0	0	0	0	0	0	0	1	0	0	0	0	0	0	0	0	0	0	31616045	2
TCF19	NEVIRAPINE	0	0	0	0	0	0	0	0	0	1	0	0	0	0	0	0	0	0	0	0	21810746	2
LTA	BAMINERCEPT	1	0	1	0	0	0	0	0	0	0	0	0	0	0	0	0	0	0	0	0		2
LTA	CARBAMAZEPINE	0	0	0	0	0	0	0	0	0	1	0	0	0	0	0	0	0	0	0	0	11294926	2
LTB	BAMINERCEPT	1	0	1	0	0	0	0	0	0	0	0	0	0	0	0	0	0	0	0	0		2
PRRC2A	CARBOPLATIN	0	0	0	0	0	0	0	0	0	1	0	0	0	0	0	0	0	0	0	0	31616045	2
PRRC2A	GEMCITABINE	0	0	0	0	0	0	0	0	0	1	0	0	0	0	0	0	0	0	0	0	31616045	2
PRRC2A	CARBAMAZEPINE	0	0	0	0	0	0	0	0	0	1	0	0	0	0	0	0	0	0	0	0	16538176	2
TNF	AFELIMOMAB	1	0	0	0	0	0	0	0	0	0	0	0	0	0	0	0	0	0	0	0	10829362	2
TNF	OZORALIZUMAB	1	0	1	0	0	0	0	0	0	0	0	0	0	0	0	0	0	0	0	0		2
TNF	PEGSUNERCEPT	1	1	0	0	0	0	0	0	0	0	0	0	0	0	0	0	0	0	0	0		2
TNF	BUPIVACAINE	0	0	0	0	0	0	1	0	0	0	0	0	0	0	0	0	0	0	0	0	15781526	2
TNF	PYRAZINAMIDE	0	0	0	0	0	0	0	0	0	1	0	0	0	0	0	0	0	0	0	0	22151084	2
TNF	LACTULOSE	0	0	0	0	0	0	1	0	0	0	0	0	0	0	0	0	0	0	0	0	11226652	2
TNF	SPIRONOLACTONE	0	0	0	0	0	0	1	0	0	0	0	0	0	0	0	0	0	0	0	0	16837769	2
TNF	RABEPRAZOLE	0	0	0	0	0	0	1	0	0	0	0	0	0	0	0	0	0	0	0	0	16815316	2
TNF	MEROPENEM	0	0	0	0	0	0	1	0	0	0	0	0	0	0	0	0	0	0	0	0	8354907	2
TNF	LENALIDOMIDE	0	1	0	0	0	0	0	0	0	0	0	0	0	0	0	1	0	0	0	0		2
TNF	ALTEPLASE	0	0	0	0	0	0	1	0	0	0	0	0	0	0	0	0	0	0	0	0	8615653	2
TNF	MIDAZOLAM	0	0	0	0	0	0	1	0	0	0	0	0	0	0	0	0	0	0	0	0	16406030	2
TNF	RUTIN	0	0	0	0	0	0	1	0	0	0	0	0	0	0	0	0	0	0	0	0	12423426	2
TNF	PYRIDOXINE	0	0	0	0	0	0	1	0	0	0	0	0	0	0	0	0	0	0	0	0	16277693	2
TNF	HYDROXYCHLOROQUINE	0	0	0	0	0	0	1	0	0	0	0	0	0	0	0	0	0	0	0	0	9002011	2
TNF	GENTAMICIN	0	0	0	0	0	0	1	0	0	0	0	0	0	0	0	0	0	0	0	0	14565862	2
TNF	SORAFENIB	0	0	0	0	0	0	0	0	0	1	0	0	0	0	0	0	0	0	0	0	22736425	2
TNF	GLIMEPIRIDE	0	0	0	0	0	0	1	0	0	0	0	0	0	0	0	0	0	0	0	0	14686960	2
TNF	LAPACHONE	0	0	0	0	0	0	1	0	0	0	0	0	0	0	0	0	0	0	0	0	10075082	2
TNF	MILTEFOSINE	0	0	0	0	0	0	1	0	0	0	0	0	0	0	0	0	0	0	0	0	7883777	2
TNF	ISONIAZID	0	0	0	0	0	0	0	0	0	1	0	0	0	0	0	0	0	0	0	0	22151084	2
TNF	GEMCITABINE	0	0	0	0	0	0	0	0	0	1	0	0	0	0	0	0	0	0	0	0	31616045	2
TNF	PROPYLTHIOURACIL	0	0	0	0	0	0	1	0	0	0	0	0	0	0	0	0	0	0	0	0	15119959	2
TNF	OMEPRAZOLE	0	0	0	0	0	0	1	0	0	0	0	0	0	0	0	0	0	0	0	0	16815316	2
TNF	RIFAMPIN	0	0	0	0	0	0	0	0	0	1	0	0	0	0	0	0	0	0	0	0	22151084	2
TNF	ETHAMBUTOL	0	0	0	0	0	0	0	0	0	1	0	0	0	0	0	0	0	0	0	0	22151084	2
TNF	ATORVASTATIN	0	0	0	0	0	0	0	0	0	1	0	0	0	0	0	0	0	0	0	0	18997459	2
TNF	METHIMAZOLE	0	0	0	0	0	0	1	0	0	0	0	0	0	0	0	0	0	0	0	0	8491516	2
TNF	CYCLOSPORINE	0	0	0	0	0	0	0	0	0	1	0	0	0	0	0	0	0	0	0	0	18444945	2
TNF	STAVUDINE	0	0	0	0	0	0	0	0	0	1	0	0	0	0	0	0	0	0	0	0	20887379	2
TNF	SOBLIDOTIN	0	0	0	0	0	0	1	0	0	0	0	0	0	0	0	0	0	0	0	0	11855751	2
TNF	HALOFUGINONE	0	0	0	0	0	0	1	0	0	0	0	0	0	0	0	0	0	0	0	0	16769768	2
TNF	DIDANOSINE	0	0	0	0	0	0	1	0	0	0	0	0	0	0	0	0	0	0	0	0	9430255	2
TNF	BCG VACCINE	0	0	0	0	0	0	1	0	0	0	0	0	0	0	0	0	0	0	0	0	10022737	2
TNF	CARBOPLATIN	0	0	0	0	0	0	0	0	0	1	0	0	0	0	0	0	0	0	0	0	31616045	2
BAG6	CARBAMAZEPINE	0	0	0	0	0	0	0	0	0	1	0	0	0	0	0	0	0	0	0	0	16538176	2
EHMT2	CHEMBL576781	0	0	0	0	1	0	0	0	0	0	0	0	0	0	0	0	0	0	0	0	19891491	2
HSPA1A	CARBAMAZEPINE	0	0	0	0	0	0	0	0	0	1	0	0	0	0	0	0	0	0	0	0	16538175	2
HSPA1L	CARBAMAZEPINE	0	0	0	0	0	0	0	0	0	1	0	0	0	0	0	0	0	0	0	0	16538175	2
HLA-DQB1	LAMOTRIGINE	0	0	0	0	0	0	0	0	0	1	0	0	0	0	0	0	0	0	0	0	19668019	2
HLA-DQB1	FLUPIRTINE	0	0	0	0	0	0	0	0	0	1	0	0	0	0	0	0	0	0	0	0	26959717	2
HLA-DQB1	ACETAMINOPHEN	0	0	0	0	0	0	0	0	0	1	0	0	0	0	0	0	0	0	0	0	21545408	2
HLA-DQB1	FLOXACILLIN	0	0	0	0	0	0	0	0	0	1	0	0	0	0	0	0	0	0	0	0	30664875	2
HLA-DQB1	TICLOPIDINE	0	0	0	0	0	0	0	0	0	1	0	0	0	0	0	0	0	0	0	0	17339877	2
HLA-DQB1	LUMIRACOXIB	0	0	0	0	0	0	0	0	0	1	0	0	0	0	0	0	0	0	0	0	20639878	2
HLA-DQB1	CARBAMAZEPINE	0	0	0	0	0	0	0	0	0	1	0	0	0	0	0	0	0	0	0	0	24399721	2
PSMB8	BELACTOSIN A	0	0	0	0	1	0	0	0	0	0	0	0	0	0	0	0	0	0	0	0	23547757	2
PSMB8	LACTACYSTIN	0	0	0	0	1	0	0	0	0	0	0	0	0	0	0	0	0	0	0	0	23547757	2
HLA-DQA1	LUMIRACOXIB	0	0	0	0	0	0	0	0	0	1	0	0	0	0	0	0	0	0	0	0	20639878	2
HLA-DQA1	AZATHIOPRINE	0	0	0	0	0	0	0	0	0	1	0	0	0	0	0	0	0	0	0	0	25217962	2
HLA-DQA1	MERCAPTOPURINE	0	0	0	0	0	0	0	0	0	1	0	0	0	0	0	0	0	0	0	0	25217962	2
HLA-DRA	AMOXICILLIN	0	0	0	0	0	0	0	0	0	1	0	0	0	0	0	0	0	0	0	0	30664875	2
HLA-DRA	ATEZOLIZUMAB	0	0	0	0	0	1	0	0	0	0	0	0	0	0	0	0	0	0	0	0	26822383	2
HLA-DRA	NIVOLUMAB	0	0	0	0	0	1	0	0	0	0	0	0	0	0	0	0	0	0	0	0	26822383	2
HLA-DRA	FLOXACILLIN	0	0	0	0	0	0	0	0	0	1	0	0	0	0	0	0	0	0	0	0	30664875	2
HLA-DRA	PEMBROLIZUMAB	0	0	0	0	0	1	0	0	0	0	0	0	0	0	0	0	0	0	0	0	26822383	2
HLA-DRA	CLAVULANIC ACID	0	0	0	0	0	0	0	0	0	1	0	0	0	0	0	0	0	0	0	0	30664875	2
NOTCH4	ALLOPURINOL	0	0	0	0	0	0	0	0	0	1	0	0	0	0	0	0	0	0	0	0	29193002	2
BAK1	KERACYANIN	0	0	0	0	1	0	0	0	0	0	0	0	0	0	0	0	0	0	0	0	17360708	2
CDKN1A	CARBOPLATIN	0	0	0	0	0	0	1	0	0	0	0	0	0	0	0	0	0	0	0	0	12168940	2
CDKN1A	NICOTINE	0	0	0	0	0	0	1	0	0	0	0	0	0	0	0	0	0	0	0	0	16011614	2
CDKN1A	DEOXYCYTIDINE	0	0	0	0	0	0	1	0	0	0	0	0	0	0	0	0	0	0	0	0	16276353	2
CDKN1A	VINBLASTINE	0	0	0	0	0	0	1	0	0	0	0	0	0	0	0	0	0	0	0	0	8763853	2
CDKN1A	IRINOTECAN HYDROCHLORIDE	0	0	0	0	0	0	1	0	0	0	0	0	0	0	0	0	0	0	0	0	12032863	2
CDKN1A	MELPHALAN	0	0	0	0	0	0	1	0	0	0	0	0	0	0	0	0	0	0	0	0	11507071	2
CDKN1A	DIAZIQUONE	0	0	0	0	0	0	1	0	0	0	0	0	0	0	0	0	0	0	0	0	8943236	2
CDKN1A	DICUMAROL	0	0	0	0	0	0	1	0	0	0	0	0	0	0	0	0	0	0	0	0	9343371	2
CDKN1A	PENTETIC ACID	0	0	0	0	0	0	1	0	0	0	0	0	0	0	0	0	0	0	0	0	9343371	2
CDKN1A	CYCLOSPORINE	0	0	0	0	0	0	1	0	0	0	0	0	0	0	0	0	0	0	0	0	11827957	2
CDKN1A	CLADRIBINE	0	0	0	0	0	0	1	0	0	0	0	0	0	0	0	0	0	0	0	0	12473386	2
CDKN1A	ACETAMINOPHEN	0	0	0	0	0	0	1	0	0	0	0	0	0	0	0	0	0	0	0	0	16330492	2
CDKN1A	EPOETIN BETA	0	0	0	0	0	0	1	0	0	0	0	0	0	0	0	0	0	0	0	0	11023508	2
CDKN1A	PACLITAXEL	0	0	0	0	0	0	1	0	0	0	0	0	0	0	0	0	0	0	0	0	12574211	2
CDKN1A	CELECOXIB	0	0	0	0	0	0	0	0	0	1	0	0	0	0	0	0	0	0	0	0	22336956	2
CDKN1A	ROMIDEPSIN	0	0	0	0	0	0	1	0	0	0	0	0	0	0	0	0	0	0	0	0	15014036	2
CDKN1A	FLUTAMIDE	0	0	0	0	0	0	1	0	0	0	0	0	0	0	0	0	0	0	0	0	16281084	2
CCND3	PALBOCICLIB	0	0	0	0	0	1	0	0	0	0	0	0	0	0	0	0	0	0	0	0	23079656	2
HSP90AB1	RETASPIMYCIN	0	0	1	0	0	0	0	0	0	0	0	0	0	1	0	0	0	0	0	0		2
HSP90AB1	RETASPIMYCIN HYDROCHLORIDE	1	0	1	0	0	0	0	0	0	0	0	0	0	0	0	0	0	0	0	0		2
HSP90AB1	CHEMBL2022241	0	0	0	0	1	0	0	0	0	0	0	0	0	0	0	0	0	0	0	0	25756299	2
HSP90AB1	NOVOBIOCIN	0	0	0	0	1	0	0	0	0	0	0	0	0	0	0	0	0	0	0	0	23859777	2
HSP90AB1	COUMERMYCIN A1	0	0	0	0	1	0	0	0	0	0	0	0	0	0	0	0	0	0	0	0	24360559	2
HSP90AB1	CHEMBL553939	0	1	1	0	0	0	0	0	0	0	0	0	0	0	0	0	0	0	0	0		2
HSP90AB1	CHEMBL192264	0	0	0	0	1	0	0	0	0	0	0	0	0	0	0	0	0	0	0	0	21764310	2
HSP90AB1	RADANAMYCIN	0	0	0	0	1	0	0	0	0	0	0	0	0	0	0	0	0	0	0	0	16464590	2
HSP90AB1	GAMBOGIC ACID	0	0	0	0	1	0	0	0	0	0	0	0	0	0	0	0	0	0	0	0	21486005	2
HSP90AB1	BEVACIZUMAB	0	0	0	0	0	0	0	0	0	1	0	0	0	0	0	0	0	0	0	0	29871907	2
HSP90AB1	SILIBININ	0	0	0	0	1	0	0	0	0	0	0	0	0	0	0	0	0	0	0	0	21273068	2
HSP90AB1	CUCURBITACIN D	0	0	0	0	1	0	0	0	0	0	0	0	0	0	0	0	0	0	0	0	25756299	2
HSP90AB1	DERRUBONE	0	0	0	0	1	0	0	0	0	0	0	0	0	0	0	0	0	0	0	0	18020309	2
HSP90AB1	CYCLOPROPARADICICOL	0	0	0	0	1	0	0	0	0	0	0	0	0	0	0	0	0	0	0	0	17603540	2
HSP90AB1	MONOCILLIN I	0	0	0	0	1	0	0	0	0	0	0	0	0	0	0	0	0	0	0	0	16499313	2
SLC29A1	DIPYRIDAMOLE	1	0	0	0	0	0	0	0	1	0	0	0	0	0	0	0	0	0	0	0		2
SLC29A1	NITROBENZYLMERCAPTOPURINE RIBONUCLEOSIDE	0	0	0	0	1	0	0	0	0	0	0	0	0	0	0	0	0	0	0	0	19574048	2
SLC29A1	FLUDARABINE	0	0	0	0	1	0	0	0	0	0	0	0	0	0	0	0	0	0	0	0	23388705	2
SLC29A1	TECADENOSON	0	0	0	0	1	0	0	0	0	0	0	0	0	0	0	0	0	0	0	0	23388705	2
SLC29A1	PACLITAXEL	0	0	0	0	0	0	0	0	0	1	0	0	0	0	0	0	0	0	0	0	24361227	2
SLC29A1	TRIFLURIDINE	0	0	0	0	0	0	0	0	0	1	0	0	0	0	0	0	0	0	0	0	28992563	2
SLC29A1	RIBAVIRIN	0	0	0	0	0	0	0	0	0	1	0	0	0	0	0	0	0	0	0	0	20812847	2
SLC29A1	URIDINE	0	0	0	0	0	0	1	0	0	0	0	0	0	0	0	0	0	0	0	0	10763851	2
TNFAIP3	METHOTREXATE	0	0	0	0	0	0	0	0	0	1	0	0	0	0	0	0	0	0	0	0	20921970	2
CEP43	BRIVANIB	0	0	0	0	0	0	0	0	0	1	0	0	0	0	0	0	0	0	0	0	20124951	2
RPS6KA2	CHEMBL573107	0	1	0	0	0	0	0	0	1	0	0	0	0	0	0	0	0	0	0	0		2
PMS2	NIVOLUMAB	0	0	0	0	0	1	0	0	0	0	0	0	0	0	0	0	0	0	0	0	27001570	2
RAC1	PLX-4720	0	0	0	0	0	1	0	0	0	0	0	0	0	0	0	0	0	0	0	0	31257073	2
RAC1	CHEMBL554475	0	0	0	0	1	0	0	0	0	0	0	0	0	0	0	0	0	0	0	0	19527032	2
RAC1	CHEMBL562095	0	0	0	0	1	0	0	0	0	0	0	0	0	0	0	0	0	0	0	0	19527032	2
RAC1	CHEMBL563777	0	0	0	0	1	0	0	0	0	0	0	0	0	0	0	0	0	0	0	0	19527032	2
RAC1	CHEMBL257119	0	0	0	0	1	0	0	0	0	0	0	0	0	0	0	0	0	0	0	0	19527032	2
DDC	BENSERAZIDE	0	1	0	0	0	0	0	0	1	0	0	0	0	0	0	0	0	0	0	0		2
DDC	SIROLIMUS	0	0	0	0	0	0	1	0	0	0	0	0	0	0	0	0	0	0	0	0	16126007	2
DDC	NICOTINE	0	0	0	0	0	0	0	0	0	1	0	0	0	0	0	0	0	0	0	0	16740595	2
IKZF1	LENALIDOMIDE	0	0	0	0	0	0	0	1	0	0	0	0	0	0	0	0	0	0	0	0	24292625	2
IKZF1	FLUDARABINE	0	0	0	0	0	1	0	0	0	0	0	0	0	0	0	0	0	0	0	0	30044693	2
IKZF1	CYTARABINE	0	0	0	0	0	1	0	0	0	0	0	0	0	0	0	0	0	0	0	0	30044693	2
IKZF1	DAUNORUBICIN	0	0	0	0	0	1	0	0	0	0	0	0	0	0	0	0	0	0	0	0	30044693	2
IKZF1	METHOTREXATE	0	0	0	0	0	1	0	0	0	0	0	0	0	0	0	0	0	0	0	0	30044693	2
IKZF1	IMATINIB	0	0	0	0	0	1	0	0	0	0	0	0	0	0	0	0	0	0	0	0	30044693	2
CDK6	LEROCICLIB	0	1	0	0	0	0	0	0	1	0	0	0	0	0	0	0	0	0	0	0		2
CDK6	AT-7519	1	0	0	0	0	0	0	0	1	0	0	0	0	0	0	0	0	0	0	0		2
CDK6	G1T28-1	1	1	0	0	0	0	0	0	0	0	0	0	0	0	0	0	0	0	0	0		2
CDK6	TRILACICLIB	0	1	0	0	0	0	0	0	1	0	0	0	0	0	0	0	0	0	0	0		2
CDK6	DEXAMETHASONE	0	0	0	0	0	1	0	0	0	0	0	0	0	0	0	0	0	0	0	0	29408328	2
CDK6	FULVESTRANT	0	0	0	0	0	1	0	0	0	0	0	0	0	0	0	0	0	0	0	0	27252418	2
MYC	MELATONIN	0	0	0	0	0	0	1	0	0	0	0	0	0	0	0	0	0	0	0	0	7629697	2
MYC	AMINOPTERIN	0	0	0	0	0	0	1	0	0	0	0	0	0	0	0	0	0	0	0	0	11410244	2
MYC	THROMBIN	0	0	0	0	0	0	1	0	0	0	0	0	0	0	0	0	0	0	0	0	3023371	2
MYC	QUINAPRIL	0	0	0	0	0	0	1	0	0	0	0	0	0	0	0	0	0	0	0	0	9370386	2
MYC	PROTOPORPHYRIN	0	0	0	0	0	0	1	0	0	0	0	0	0	0	0	0	0	0	0	0	9868803	2
MYC	NOVOBIOCIN	0	0	0	0	0	0	1	0	0	0	0	0	0	0	0	0	0	0	0	0	3528175	2
MYC	MITOGUAZONE	0	0	0	0	0	0	1	0	0	0	0	0	0	0	0	0	0	0	0	0	3528175	2
MYC	TROGLITAZONE	0	0	0	0	0	0	1	0	0	0	0	0	0	0	0	0	0	0	0	0	11344222	2
MYC	DIETHYLSTILBESTROL	0	0	0	0	0	0	1	0	0	0	0	0	0	0	0	0	0	0	0	0	15545218	2
MYC	CHEMBL35482	0	0	0	0	0	0	1	0	0	0	0	0	0	0	0	0	0	0	0	0	11196459	2
MYC	OLAPARIB	0	0	0	0	0	1	0	0	0	0	0	0	0	0	0	0	0	0	0	0	28490518	2
MYC	AN-9	0	0	0	0	0	0	1	0	0	0	0	0	0	0	0	0	0	0	0	0	8348968	2
MYC	INDOMETHACIN	0	0	0	0	0	0	1	0	0	0	0	0	0	0	0	0	0	0	0	0	10403534	2
MYC	PREXASERTIB	0	0	0	0	0	1	0	0	0	0	0	0	0	0	0	0	0	0	0	0	28490518	2
MYC	IBRUTINIB	0	0	0	0	0	1	0	0	0	0	0	0	0	0	0	0	0	0	0	0	28830912	2
MYC	CISPLATIN	0	0	0	0	0	1	0	0	0	0	0	0	0	0	0	0	0	0	0	0	28490518	2
MYC	BIZELESIN	0	0	0	0	0	0	1	0	0	0	0	0	0	0	0	0	0	0	0	0	10933811	2
MYC	VERAPAMIL	0	0	0	0	0	0	1	0	0	0	0	0	0	0	0	0	0	0	0	0	1511424	2
MYC	IMATINIB	0	0	0	0	0	0	1	0	0	0	0	0	0	0	0	0	0	0	0	0	15517875	2
MYC	SULINDAC	0	0	0	0	0	0	1	0	0	0	0	0	0	0	0	0	0	0	0	0	12414619	2
MYC	LITHIUM	0	0	0	0	0	0	1	0	0	0	0	0	0	0	0	0	0	0	0	0	15286700	2
MYC	VORINOSTAT	0	0	0	0	0	0	1	0	0	0	0	0	0	0	0	0	0	0	0	0	15583844	2
MYC	ANTIBIOTIC	0	0	0	0	0	0	1	0	0	0	0	0	0	0	0	0	0	0	0	0	2654492	2
MYC	AZACITIDINE	0	0	0	0	0	0	1	0	0	0	0	0	0	0	0	0	0	0	0	0	9006118	2
MYC	METHYLPREDNISOLONE	0	0	0	0	0	0	1	0	0	0	0	0	0	0	0	0	0	0	0	0	9169090	2
MYC	GLUTAMINE	0	0	0	0	0	0	1	0	0	0	0	0	0	0	0	0	0	0	0	0	16898871	2
MYC	CETUXIMAB	0	0	0	0	0	0	1	0	0	0	0	0	0	0	0	0	0	0	0	0	3085922	2
MYC	LOBAPLATIN	0	0	0	0	0	0	1	0	0	0	0	0	0	0	0	0	0	0	0	0	11116285	2
MYC	THIOGUANINE	0	0	0	0	0	0	1	0	0	0	0	0	0	0	0	0	0	0	0	0	1988936	2
MYC	HYPOXANTHINE	0	0	0	0	0	0	1	0	0	0	0	0	0	0	0	0	0	0	0	0	3528863	2
MYC	AMIFOSTINE	0	0	0	0	0	0	1	0	0	0	0	0	0	0	0	0	0	0	0	0	9450496	2
MYC	BROMOCRIPTINE	0	0	0	0	0	0	1	0	0	0	0	0	0	0	0	0	0	0	0	0	11680511	2
MYC	ADOZELESIN	0	0	0	0	0	0	1	0	0	0	0	0	0	0	0	0	0	0	0	0	10933811	2
PVT1	GLIVEC	0	0	0	0	0	0	1	0	0	0	0	0	0	0	0	0	0	0	0	0	15251464	2
TG	AMINOGLUTETHIMIDE	0	0	0	0	0	0	1	0	0	0	0	0	0	0	0	0	0	0	0	0	3781413	2
TG	AMIODARONE	0	0	0	0	0	0	1	0	0	0	0	0	0	0	0	0	0	0	0	0	8778159	2
TG	ALCOHOL	0	0	0	0	0	0	1	0	0	0	0	0	0	0	0	0	0	0	0	0	8289752	2
TG	ACEBUTOLOL	0	0	0	0	0	0	1	0	0	0	0	0	0	0	0	0	0	0	0	0	2878948	2
TG	ISOTRETINOIN	0	0	0	0	0	0	1	0	0	0	0	0	0	0	0	0	0	0	0	0	12656659	2
TG	PREDNISONE	0	0	0	0	0	0	1	0	0	0	0	0	0	0	0	0	0	0	0	0	2745931	2
TG	FLUDEOXYGLUCOSE-F18	0	0	0	0	0	0	1	0	0	0	0	0	0	0	0	0	0	0	0	0	10452315	2
TG	GENISTEIN	0	0	0	0	0	0	1	0	0	0	0	0	0	0	0	0	0	0	0	0	16475902	2
TG	RETINOL	0	0	0	0	0	0	1	0	0	0	0	0	0	0	0	0	0	0	0	0	11563543	2
TG	CALCITRIOL	0	0	0	0	0	0	1	0	0	0	0	0	0	0	0	0	0	0	0	0	15319350	2
TG	OCTREOTIDE	0	0	0	0	0	0	1	0	0	0	0	0	0	0	0	0	0	0	0	0	14530610	2
TG	HEXAMETHYLENEBISACETAMIDE	0	0	0	0	0	0	1	0	0	0	0	0	0	0	0	0	0	0	0	0	10650339	2
TG	ALDESLEUKIN	0	0	0	0	0	0	1	0	0	0	0	0	0	0	0	0	0	0	0	0	2149997	2
TG	DEXAMETHASONE	0	0	0	0	0	0	1	0	0	0	0	0	0	0	0	0	0	0	0	0	1174132	2
TG	AZACITIDINE	0	0	0	0	0	0	1	0	0	0	0	0	0	0	0	0	0	0	0	0	2476239	2
TG	PHENYTOIN	0	0	0	0	0	0	1	0	0	0	0	0	0	0	0	0	0	0	0	0	3935423	2
IL2RA	INOLIMOMAB	1	1	0	0	0	0	0	0	0	0	0	0	0	0	0	0	0	0	0	0		2
IL2RA	PROPYLTHIOURACIL	0	0	0	0	0	0	1	0	0	0	0	0	0	0	0	0	0	0	0	0	8340196	2
IL2RA	LMB-2	1	1	0	0	0	0	0	0	0	0	0	0	0	0	0	0	0	0	0	0		2
IL2RA	CETIRIZINE	0	0	0	0	0	0	1	0	0	0	0	0	0	0	0	0	0	0	0	0	7591422	2
IL2RA	VERAPAMIL	0	0	0	0	0	0	1	0	0	0	0	0	0	0	0	0	0	0	0	0	2645720	2
IL2RA	PACLITAXEL	0	0	0	0	0	0	1	0	0	0	0	0	0	0	0	0	0	0	0	0	16595340	2
IL2RA	CAFFEINE	0	0	0	0	0	0	1	0	0	0	0	0	0	0	0	0	0	0	0	0	3129507	2
IL2RA	THYROXINE	0	0	0	0	0	0	1	0	0	0	0	0	0	0	0	0	0	0	0	0	15068404	2
IL2RA	DECITABINE	0	0	0	0	0	0	1	0	0	0	0	0	0	0	0	0	0	0	0	0	15814281	2
IL2RA	DINITROCHLOROBENZENE	0	0	0	0	0	0	1	0	0	0	0	0	0	0	0	0	0	0	0	0	9607619	2
IL2RA	MERCAPTOPURINE	0	0	0	0	0	0	1	0	0	0	0	0	0	0	0	0	0	0	0	0	1580639	2
IL2RA	FLUOROURACIL	0	0	0	0	0	0	1	0	0	0	0	0	0	0	0	0	0	0	0	0	9238541	2
IL2RA	ATORVASTATIN	0	0	0	0	0	0	1	0	0	0	0	0	0	0	0	0	0	0	0	0	16207471	2
IL2RA	BRYOSTATIN	0	0	0	0	0	0	1	0	0	0	0	0	0	0	0	0	0	0	0	0	10988359	2
IL2RA	STAUROSPORINE	0	0	0	0	0	0	1	0	0	0	0	0	0	0	0	0	0	0	0	0	1560050	2
IL2RA	PROGESTERONE	0	0	0	0	0	0	1	0	0	0	0	0	0	0	0	0	0	0	0	0	12405159	2
IL2RA	DIDANOSINE	0	0	0	0	0	0	1	0	0	0	0	0	0	0	0	0	0	0	0	0	1774603	2
IL2RA	GARLIC	0	0	0	0	0	0	1	0	0	0	0	0	0	0	0	0	0	0	0	0	10737264	2
IL2RA	FLUTAMIDE	0	0	0	0	0	0	1	0	0	0	0	0	0	0	0	0	0	0	0	0	11312147	2
IL2RA	THEOPHYLLINE	0	0	0	0	0	0	1	0	0	0	0	0	0	0	0	0	0	0	0	0	3129507	2
IL2RA	CLADRIBINE	0	0	0	0	0	0	1	0	0	0	0	0	0	0	0	0	0	0	0	0	9619876	2
IL2RA	METHYLPREDNISOLONE	0	0	0	0	0	0	1	0	0	0	0	0	0	0	0	0	0	0	0	0	8981122	2
IL2RA	LENTINAN	0	0	0	0	0	0	1	0	0	0	0	0	0	0	0	0	0	0	0	0	10681809	2
TRAF1	INFLIXIMAB	0	0	0	0	0	0	0	0	0	1	0	0	0	0	0	0	0	0	0	0	23007924	2
TRAF1	ADALIMUMAB	0	0	0	0	0	0	0	0	0	1	0	0	0	0	0	0	0	0	0	0	23007924	2
TRAF1	ETANERCEPT	0	0	0	0	0	0	0	0	0	1	0	0	0	0	0	0	0	0	0	0	23007924	2
ARHGAP12	METHYLPHENIDATE	0	0	0	0	0	0	0	0	0	1	0	0	0	0	0	0	0	0	0	0	29382897	2
ZEB1	DOXORUBICIN	0	0	0	0	0	1	0	0	0	0	0	0	0	0	0	0	0	0	0	0	24013721	2
ZEB1	SALINOMYCIN	0	0	0	0	0	1	0	0	0	0	0	0	0	0	0	0	0	0	0	0	24013721	2
ZEB1	OXALIPLATIN	0	0	0	0	0	1	0	0	0	0	0	0	0	0	0	0	0	0	0	0	29151941	2
ARID5B	HALOPERIDOL	0	0	0	0	0	0	0	0	0	1	0	0	0	0	0	0	0	0	0	0	27023437	2
ARID5B	METHOTREXATE	0	0	0	0	0	0	0	0	0	1	0	0	0	0	0	0	0	0	0	0	24712521	2
RTKN2	HALOPERIDOL	0	0	0	0	0	0	0	0	0	1	0	0	0	0	0	0	0	0	0	0	27023437	2
ADO	HYDROCHLOROTHIAZIDE	0	0	0	0	0	0	0	0	0	1	0	0	0	0	0	0	0	0	0	0	31327267	2
CAMK2G	BOSUTINIB	0	0	0	0	0	0	0	0	1	0	0	0	0	0	0	0	0	0	0	0	23493838	2
CAMK2G	LITHIUM	0	0	0	0	0	0	1	0	0	0	0	0	0	0	0	0	0	0	0	0	12614997	2
CAMK2G	HALOPERIDOL	0	0	0	0	0	0	1	0	0	0	0	0	0	0	0	0	0	0	0	0	12614997	2
PLAU	FILGRASTIM	0	0	0	0	0	0	1	0	0	0	0	0	0	0	0	0	0	0	0	0	16331631	2
PLAU	DACARBAZINE	0	0	0	0	0	0	1	0	0	0	0	0	0	0	0	0	0	0	0	0	9378540	2
PLAU	SIROLIMUS	0	0	0	0	0	0	1	0	0	0	0	0	0	0	0	0	0	0	0	0	11245436	2
PLAU	ZOLEDRONIC ACID	0	0	0	0	0	0	1	0	0	0	0	0	0	0	0	0	0	0	0	0	11984068	2
PLAU	BLEOMYCIN	0	0	0	0	0	0	1	0	0	0	0	0	0	0	0	0	0	0	0	0	16224526	2
PLAU	CARMUSTINE	0	0	0	0	0	0	1	0	0	0	0	0	0	0	0	0	0	0	0	0	9219734	2
PLAU	CALCITRIOL	0	0	0	0	0	0	1	0	0	0	0	0	0	0	0	0	0	0	0	0	3139763	2
PLAU	CISPLATIN	0	0	0	0	0	0	1	0	0	0	0	0	0	0	0	0	0	0	0	0	9219734	2
PLAU	RAZOXANE	0	0	0	0	0	0	1	0	0	0	0	0	0	0	0	0	0	0	0	0	9378540	2
PLAU	ANTIBIOTIC	0	0	0	0	0	0	1	0	0	0	0	0	0	0	0	0	0	0	0	0	12724357	2
PLAU	ALENDRONIC ACID	0	0	0	0	0	0	1	0	0	0	0	0	0	0	0	0	0	0	0	0	11984068	2
PLAU	IONOMYCIN	0	0	0	0	0	0	1	0	0	0	0	0	0	0	0	0	0	0	0	0	1701176	2
PLAU	RETINOL	0	0	0	0	0	0	1	0	0	0	0	0	0	0	0	0	0	0	0	0	1576255	2
PLAU	ESTRADIOL	0	0	0	0	0	0	1	0	0	0	0	0	0	0	0	0	0	0	0	0	9662256	2
PLAU	VERAPAMIL	0	0	0	0	0	0	1	0	0	0	0	0	0	0	0	0	0	0	0	0	9579573	2
PLAU	IRESSA	0	0	0	0	0	0	1	0	0	0	0	0	0	0	0	0	0	0	0	0	16263158	2
PLAU	HYDROCORTISONE	0	0	0	0	0	0	1	0	0	0	0	0	0	0	0	0	0	0	0	0	2115769	2
PLAU	AZACITIDINE	0	0	0	0	0	0	1	0	0	0	0	0	0	0	0	0	0	0	0	0	10209960	2
PLAU	CLODRONIC ACID	0	0	0	0	0	0	1	0	0	0	0	0	0	0	0	0	0	0	0	0	11984068	2
PLAU	CELECOXIB	0	0	0	0	0	0	1	0	0	0	0	0	0	0	0	0	0	0	0	0	16172791	2
PLAU	GELDANAMYCIN	0	0	0	0	0	0	1	0	0	0	0	0	0	0	0	0	0	0	0	0	12724357	2
PLAU	PAPAVERINE	0	0	0	0	0	0	1	0	0	0	0	0	0	0	0	0	0	0	0	0	16099300	2
NFKB2	BORTEZOMIB	0	1	0	0	0	0	0	0	0	0	0	0	0	0	0	0	1	0	0	0		2
NFKB2	RUTIN	0	0	0	0	1	0	0	0	0	0	0	0	0	0	0	0	0	0	0	0	25496805	2
NFKB2	TAMARIXETIN	0	0	0	0	1	0	0	0	0	0	0	0	0	0	0	0	0	0	0	0	25190466	2
NFKB2	CHRYSOERIOL	0	0	0	0	1	0	0	0	0	0	0	0	0	0	0	0	0	0	0	0	25190466	2
NFKB2	KAEMPFERIDE	0	0	0	0	1	0	0	0	0	0	0	0	0	0	0	0	0	0	0	0	25190466	2
NFKB2	LUTEOLIN	0	0	0	0	1	0	0	0	0	0	0	0	0	0	0	0	0	0	0	0	25190466	2
NFKB2	KAEMPFEROL	0	0	0	0	1	0	0	0	0	0	0	0	0	0	0	0	0	0	0	0	25190466	2
NFKB2	APIGENIN	0	0	0	0	1	0	0	0	0	0	0	0	0	0	0	0	0	0	0	0	25190466	2
NFKB2	QUERCETAGETIN	0	0	0	0	1	0	0	0	0	0	0	0	0	0	0	0	0	0	0	0	25190466	2
NFKB2	ARTESUNATE	0	0	0	0	1	0	0	0	0	0	0	0	0	0	0	0	0	0	0	0	25074847	2
NFKB2	QUERCETIN	0	0	0	0	1	0	0	0	0	0	0	0	0	0	0	0	0	0	0	0	25190466	2
NFKB2	ISORHAMNETIN	0	0	0	0	1	0	0	0	0	0	0	0	0	0	0	0	0	0	0	0	25190466	2
NFKB2	GOSSYPETIN	0	0	0	0	1	0	0	0	0	0	0	0	0	0	0	0	0	0	0	0	25190466	2
NFKB2	ACACETIN	0	0	0	0	1	0	0	0	0	0	0	0	0	0	0	0	0	0	0	0	25190466	2
NFKB2	DIOSMETIN	0	0	0	0	1	0	0	0	0	0	0	0	0	0	0	0	0	0	0	0	25190466	2
NFKB2	SORBINIL	0	0	0	0	1	0	0	0	0	0	0	0	0	0	0	0	0	0	0	0	24819954	2
CTSD	STREPTOZOCIN	0	0	0	0	0	0	1	0	0	0	0	0	0	0	0	0	0	0	0	0	3282952	2
IGF2	DUSIGITUMAB	1	1	0	0	0	0	0	0	0	0	0	0	0	0	0	0	0	0	0	0		2
IGF2	HUMAN GROWTH HORMONE	0	0	0	0	0	0	1	0	0	0	0	0	0	0	0	0	0	0	0	0	9834461	2
IGF2	LINSITINIB	0	0	0	0	0	1	0	0	0	0	0	0	0	0	0	0	0	0	0	0	25670080	2
IGF2	FLUOXETINE	0	0	0	0	0	0	1	0	0	0	0	0	0	0	0	0	0	0	0	0	8265809	2
IGF2	GEMCITABINE	0	0	0	0	0	1	0	0	0	0	0	0	0	0	0	0	0	0	0	0	23741071	2
IGF2	BETAMETHASONE	0	0	0	0	0	0	1	0	0	0	0	0	0	0	0	0	0	0	0	0	10495414	2
IGF2	CABAZITAXEL	0	0	0	0	0	1	0	0	0	0	0	0	0	0	0	0	0	0	0	0	25670080	2
IGF2	DOCETAXEL	0	0	0	0	0	1	0	0	0	0	0	0	0	0	0	0	0	0	0	0	25670080	2
IGF2	ETOPOSIDE	0	0	0	0	0	0	1	0	0	0	0	0	0	0	0	0	0	0	0	0	15019164	2
IGF2	ANASTROZOLE	0	0	0	0	0	0	1	0	0	0	0	0	0	0	0	0	0	0	0	0	11983488	2
IGF2	GLUTAMINE	0	0	0	0	0	0	1	0	0	0	0	0	0	0	0	0	0	0	0	0	14746834	2
IGF2	GEFITINIB	0	0	0	0	0	0	1	0	0	0	0	0	0	0	0	0	0	0	0	0	16988945	2
CD44	PROGESTERONE	0	0	0	0	0	0	1	0	0	0	0	0	0	0	0	0	0	0	0	0	11605071	2
CD44	GENTAMICIN	0	0	0	0	0	0	1	0	0	0	0	0	0	0	0	0	0	0	0	0	14967965	2
CD5	INOSITOL	0	0	0	0	0	0	1	0	0	0	0	0	0	0	0	0	0	0	0	0	1371522	2
CD5	REGRAMOSTIM	0	0	0	0	0	0	1	0	0	0	0	0	0	0	0	0	0	0	0	0	10379842	2
CD5	IONOMYCIN	0	0	0	0	0	0	1	0	0	0	0	0	0	0	0	0	0	0	0	0	7540861	2
CD6	ITOLIZUMAB	0	1	0	0	0	0	0	0	1	0	0	0	0	0	0	0	0	0	0	0		2
PTGDR2	FEVIPIPRANT	1	0	0	0	0	0	0	0	1	0	0	0	0	0	0	0	0	0	0	0		2
PTGDR2	MK-7246	1	1	0	0	0	0	0	0	0	0	0	0	0	0	0	0	0	0	0	0		2
PTGDR2	DINOPROSTONE	0	0	0	0	0	0	0	0	1	0	0	0	0	0	0	0	0	0	0	0	9579725	2
PTGDR2	ADC3680	1	1	0	0	0	0	0	0	0	0	0	0	0	0	0	0	0	0	0	0		2
FEN1	METHOXSALEN	0	0	0	0	0	0	1	0	0	0	0	0	0	0	0	0	0	0	0	0	3319774	2
BAD	RUBOXISTAURIN	0	0	0	0	1	0	0	0	0	0	0	0	0	0	0	0	0	0	0	0	18077363	2
ESRRA	FULVESTRANT	0	0	0	0	1	0	0	0	0	0	0	0	0	0	0	0	0	0	0	0	23448346	2
ESRRA	ESTRADIOL	0	0	0	0	1	0	0	0	0	0	0	0	0	0	0	0	0	0	0	0	23448346	2
RPS6KA4	HESPERADIN	0	0	0	0	1	0	0	0	0	0	0	0	0	0	0	0	0	0	0	0	19035792	2
PRDX5	CHEMBL148831	0	0	0	0	1	0	0	0	0	0	0	0	0	0	0	0	0	0	0	0	26492576	2
SLC22A11	ZIDOVUDINE	0	0	0	0	0	0	0	0	0	1	0	0	0	0	0	0	0	0	0	0	22960662	2
SLC22A11	METHOTREXATE	0	0	0	0	0	0	0	0	0	1	0	0	0	0	0	0	0	0	0	0	26086825	2
KAT5	CHEMBL416038	0	0	0	0	1	0	0	0	0	0	0	0	0	0	0	0	0	0	0	0	22100137	2
RELA	MULBERROFURAN H	0	0	0	0	1	0	0	0	0	0	0	0	0	0	0	0	0	0	0	0	24901948	2
RELA	CHEMBL1940084	0	0	0	0	1	0	0	0	0	0	0	0	0	0	0	0	0	0	0	0	22153345	2
RELA	PARTHENOLIDE	0	0	0	0	1	0	0	0	0	0	0	0	0	0	0	0	0	0	0	0	25190466	2
RELA	SORBINIL	0	0	0	0	1	0	0	0	0	0	0	0	0	0	0	0	0	0	0	0	24819954	2
RELA	CHRYSOERIOL	0	0	0	0	1	0	0	0	0	0	0	0	0	0	0	0	0	0	0	0	25190466	2
RELA	KAEMPFEROL	0	0	0	0	1	0	0	0	0	0	0	0	0	0	0	0	0	0	0	0	25190466	2
RELA	ANDROGRAPHOLIDE	0	0	0	0	1	0	0	0	0	0	0	0	0	0	0	0	0	0	0	0	22026410	2
RELA	DEHYDROXYMETHYLEPOXYQUINOMICIN	0	0	0	0	1	0	0	0	0	0	0	0	0	0	0	0	0	0	0	0	18729348	2
RELA	CUDRAFLAVONE B	0	0	0	0	1	0	0	0	0	0	0	0	0	0	0	0	0	0	0	0	24901948	2
RELA	GOSSYPETIN	0	0	0	0	1	0	0	0	0	0	0	0	0	0	0	0	0	0	0	0	25190466	2
RELA	ISOLIQUIRITIGENIN	0	0	0	0	1	0	0	0	0	0	0	0	0	0	0	0	0	0	0	0	21866899	2
RELA	BROMOPYROGALLOL RED	0	0	0	0	1	0	0	0	0	0	0	0	0	0	0	0	0	0	0	0	16759101	2
RELA	PYROCATECHOL VIOLET	0	0	0	0	1	0	0	0	0	0	0	0	0	0	0	0	0	0	0	0	16759101	2
RELA	DIOSMETIN	0	0	0	0	1	0	0	0	0	0	0	0	0	0	0	0	0	0	0	0	25190466	2
RELA	MORUSINOL	0	0	0	0	1	0	0	0	0	0	0	0	0	0	0	0	0	0	0	0	24901948	2
RELA	ISORHAMNETIN	0	0	0	0	1	0	0	0	0	0	0	0	0	0	0	0	0	0	0	0	25190466	2
RELA	RUTIN	0	0	0	0	1	0	0	0	0	0	0	0	0	0	0	0	0	0	0	0	25496805	2
RELA	QUERCETAGETIN	0	0	0	0	1	0	0	0	0	0	0	0	0	0	0	0	0	0	0	0	25190466	2
RELA	TAMARIXETIN	0	0	0	0	1	0	0	0	0	0	0	0	0	0	0	0	0	0	0	0	25190466	2
RELA	VORICONAZOLE	0	0	0	0	1	0	0	0	0	0	0	0	0	0	0	0	0	0	0	0	18625774	2
RELA	ARTESUNATE	0	0	0	0	1	0	0	0	0	0	0	0	0	0	0	0	0	0	0	0	25074847	2
RELA	GEFITINIB	0	0	0	0	0	0	0	0	0	1	0	0	0	0	0	0	0	0	0	0	31664190	2
RELA	QUERCETIN	0	0	0	0	1	0	0	0	0	0	0	0	0	0	0	0	0	0	0	0	25190466	2
RELA	ACACETIN	0	0	0	0	1	0	0	0	0	0	0	0	0	0	0	0	0	0	0	0	25190466	2
RELA	LUTEOLIN	0	0	0	0	1	0	0	0	0	0	0	0	0	0	0	0	0	0	0	0	25190466	2
RELA	APIGENIN	0	0	0	0	1	0	0	0	0	0	0	0	0	0	0	0	0	0	0	0	25190466	2
RELA	PYROGALLOL RED	0	0	0	0	1	0	0	0	0	0	0	0	0	0	0	0	0	0	0	0	16759101	2
RELA	DEXAMETHASONE	0	0	0	0	1	0	0	0	0	0	0	0	0	0	0	0	0	0	0	0	23219855	2
RELA	PLUMBAGIN	0	0	0	0	1	0	0	0	0	0	0	0	0	0	0	0	0	0	0	0	22483392	2
RELA	CYNAROPICRIN	0	0	0	0	1	0	0	0	0	0	0	0	0	0	0	0	0	0	0	0	23232059	2
RELA	CHEMBL8483	0	0	0	0	1	0	0	0	0	0	0	0	0	0	0	0	0	0	0	0	18566250	2
RELA	KAEMPFERIDE	0	0	0	0	1	0	0	0	0	0	0	0	0	0	0	0	0	0	0	0	25190466	2
CFL1	PATULIN	0	0	0	0	1	0	0	0	0	0	0	0	0	0	0	0	0	0	0	0	16680159	2
CFL1	CLOTRIMAZOLE	0	0	0	0	1	0	0	0	0	0	0	0	0	0	0	0	0	0	0	0	16680159	2
CFL1	ROTENONE	0	0	0	0	1	0	0	0	0	0	0	0	0	0	0	0	0	0	0	0	16680159	2
CFL1	CLOFIBRATE	0	0	0	0	1	0	0	0	0	0	0	0	0	0	0	0	0	0	0	0	16680159	2
CFL1	FENOFIBRATE	0	0	0	0	1	0	0	0	0	0	0	0	0	0	0	0	0	0	0	0	16680159	2
CFL1	MG-132	0	0	0	0	1	0	0	0	0	0	0	0	0	0	0	0	0	0	0	0	16680159	2
CFL1	CINNARIZINE	0	0	0	0	1	0	0	0	0	0	0	0	0	0	0	0	0	0	0	0	16680159	2
CFL1	SERTRALINE	0	0	0	0	1	0	0	0	0	0	0	0	0	0	0	0	0	0	0	0	16680159	2
FOSL1	ALTEPLASE	0	0	0	0	0	0	1	0	0	0	0	0	0	0	0	0	0	0	0	0	7761434	2
SF3B2	CHEMBL1221944	0	0	0	0	1	0	0	0	0	0	0	0	0	0	0	0	0	0	0	0	17643111	2
KCNJ1	GLIPIZIDE	0	0	1	1	0	0	0	0	0	0	0	0	0	0	0	0	0	0	0	0		2
KCNJ1	CHLORPROPAMIDE	0	0	1	1	0	0	0	0	0	0	0	0	0	0	0	0	0	0	0	0		2
KCNJ1	HYDROCHLOROTHIAZIDE	0	0	0	0	0	0	0	0	0	1	0	0	0	0	0	0	0	0	0	0	22907731	2
KCNJ1	GLICLAZIDE	0	0	1	1	0	0	0	0	0	0	0	0	0	0	0	0	0	0	0	0		2
KCNJ1	GLYBURIDE	0	0	1	1	0	0	0	0	0	0	0	0	0	0	0	0	0	0	0	0		2
KCNJ1	TOLAZAMIDE	0	0	1	1	0	0	0	0	0	0	0	0	0	0	0	0	0	0	0	0		2
GAPDH	ESTRADIOL	0	0	0	0	0	0	1	0	0	0	0	0	0	0	0	0	0	0	0	0	9883985	2
GAPDH	TAMOXIFEN	0	0	0	0	0	0	1	0	0	0	0	0	0	0	0	0	0	0	0	0	9883985	2
GAPDH	DEFEROXAMINE	0	0	0	0	0	0	1	0	0	0	0	0	0	0	0	0	0	0	0	0	9486123	2
GAPDH	OMIGAPIL	0	1	1	0	0	0	0	0	0	0	0	0	0	0	0	0	0	0	0	0		2
TNFRSF1A	ETANERCEPT	0	0	0	0	0	0	0	0	0	1	0	0	0	0	0	0	0	0	0	0	22480748	2
TNFRSF1A	INFLIXIMAB	0	0	0	0	0	0	0	0	0	1	0	0	0	0	0	0	0	0	0	0	22480748	2
TNFRSF1A	ADALIMUMAB	0	0	0	0	0	0	0	0	0	1	0	0	0	0	0	0	0	0	0	0	22480748	2
TNFRSF1A	CYCLOPHOSPHAMIDE	0	0	0	0	0	0	1	0	0	0	0	0	0	0	0	0	0	0	0	0	9894568	2
CHD4	VORINOSTAT	0	0	0	0	0	0	0	0	0	1	0	0	0	0	0	0	0	0	0	0	26296641	2
CD69	TOCILIZUMAB	0	0	0	0	0	0	0	0	0	1	0	0	0	0	0	0	0	0	0	0	27339827	2
TNFRSF9	UTOMILUMAB	0	1	0	0	0	0	0	0	1	0	0	0	0	0	0	0	0	0	0	0		2
HDAC7	PSAMMAPLIN A	0	0	0	0	1	0	0	0	0	0	0	0	0	0	0	0	0	0	0	0	25884112	2
HDAC7	COLFORSIN	0	0	0	0	1	0	0	0	0	0	0	0	0	0	0	0	0	0	0	0	19966789	2
HDAC7	SUBEROHYDROXAMIC ACID	0	0	0	0	1	0	0	0	0	0	0	0	0	0	0	0	0	0	0	0	16921367	2
HDAC7	BUTYRYLHYDROXAMIC ACID	0	0	0	0	1	0	0	0	0	0	0	0	0	0	0	0	0	0	0	0	21874153	2
HDAC7	PHENYLBUTYRYLHYDROXAMIC ACID	0	0	0	0	1	0	0	0	0	0	0	0	0	0	0	0	0	0	0	0	21874153	2
HDAC7	DAUNORUBICIN	0	0	0	0	1	0	0	0	0	0	0	0	0	0	0	0	0	0	0	0	22260166	2
HDAC7	7-ETHYL-10-HYDROXYCAMPTOTHECIN	0	0	0	0	1	0	0	0	0	0	0	0	0	0	0	0	0	0	0	0	23622981	2
HDAC7	APICIDIN	0	0	0	0	1	0	0	0	0	0	0	0	0	0	0	0	0	0	0	0	19705846	2
HDAC7	CHEMBL117487	0	0	0	0	1	0	0	0	0	0	0	0	0	0	0	0	0	0	0	0	17566732	2
HDAC7	CHEMBL324053	0	0	0	0	1	0	0	0	0	0	0	0	0	0	0	0	0	0	0	0	16921367	2
HDAC7	PHENYLBUTANOIC ACID	0	0	0	0	1	0	0	0	0	0	0	0	0	0	0	0	0	0	0	0	24044874	2
HDAC7	CHEMBL1650245	0	0	0	0	1	0	0	0	0	0	0	0	0	0	0	0	0	0	0	0	24044874	2
HDAC7	BUTANOIC ACID	0	0	0	0	1	0	0	0	0	0	0	0	0	0	0	0	0	0	0	0	19053749	2
CDK2	AZD-5438	1	1	0	0	0	0	0	0	0	0	0	0	0	0	0	0	0	0	0	0		2
CDK2	PHA-793887	1	1	0	0	0	0	0	0	0	0	0	0	0	0	0	0	0	0	0	0		2
CDK2	AG-24322	1	1	0	0	0	0	0	0	0	0	0	0	0	0	0	0	0	0	0	0		2
CDK2	RG-547	1	0	0	0	0	0	0	0	0	0	0	0	0	0	0	0	0	0	0	0	10592235	2
CDK2	RONICICLIB	1	0	0	0	0	0	0	0	1	0	0	0	0	0	0	0	0	0	0	0		2
CDK2	CHEMBL402915	0	0	0	0	1	0	0	0	0	0	0	0	0	0	0	0	0	0	0	0	18063365	2
CDK2	DEXAMETHASONE	0	0	0	0	0	0	1	0	0	0	0	0	0	0	0	0	0	0	0	0	10867026	2
CDK2	INDOLE-3-CARBINOL	0	0	0	0	0	0	1	0	0	0	0	0	0	0	0	0	0	0	0	0	15611077	2
CDK2	O-CHLOROACETYLCARBAMOYLFUMAGILLOL	0	0	0	0	0	0	1	0	0	0	0	0	0	0	0	0	0	0	0	0	8012959	2
CDK2	CHEMBL373822	0	0	0	0	1	0	0	0	0	0	0	0	0	0	0	0	0	0	0	0	17181166	2
CDK2	CHEMBL557670	0	0	0	0	1	0	0	0	0	0	0	0	0	0	0	0	0	0	0	0	19410453	2
CDK2	PACLITAXEL	0	0	0	0	0	0	1	0	0	0	0	0	0	0	0	0	0	0	0	0	16020661	2
CDK2	CARBOPLATIN	0	0	0	0	0	1	0	0	0	0	0	0	0	0	0	0	0	0	0	0	26006067	2
CDK2	RESVERATROL	0	0	0	0	0	0	1	0	0	0	0	0	0	0	0	0	0	0	0	0	15122319	2
CDK2	LOVASTATIN	0	0	0	0	0	0	1	0	0	0	0	0	0	0	0	0	0	0	0	0	9553123	2
CDK2	RALTITREXED	0	0	0	0	0	0	1	0	0	0	0	0	0	0	0	0	0	0	0	0	10047461	2
CDK2	CHEMBL494107	0	0	0	0	1	0	0	0	0	0	0	0	0	0	0	0	0	0	0	0	17643111	2
CDK2	ERIBULIN	0	0	0	0	0	1	0	0	0	0	0	0	0	0	0	0	0	0	0	0	26006067	2
CDK2	ACETAMINOPHEN	0	0	0	0	0	0	1	0	0	0	0	0	0	0	0	0	0	0	0	0	14644624	2
CDK2	LAPACHONE	0	0	0	0	0	0	1	0	0	0	0	0	0	0	0	0	0	0	0	0	12689523	2
CDK2	ANDROSTANOLONE	0	0	0	0	0	0	1	0	0	0	0	0	0	0	0	0	0	0	0	0	10698512	2
PMEL	TEBENTAFUSP	0	1	0	0	0	0	0	0	0	0	0	0	0	0	0	0	0	0	0	0	23263452	2
ERBB3	PATRITUMAB	1	1	0	0	0	0	0	0	0	0	0	0	0	0	0	0	0	0	0	0		2
ERBB3	DACOMITINIB	1	0	0	0	0	0	0	0	0	0	1	0	0	0	0	0	0	0	0	0		2
ERBB3	DULIGOTUZUMAB	0	1	0	0	0	0	0	0	0	0	0	0	0	1	0	0	0	0	0	0		2
ERBB3	AV-203	0	1	0	0	0	0	0	0	0	0	0	0	0	0	0	0	1	0	0	0		2
ERBB3	POZIOTINIB	1	0	0	0	0	0	0	0	0	0	1	0	0	0	0	0	0	0	0	0		2
ERBB3	AMG-888	0	0	0	0	0	0	0	0	0	0	0	0	0	1	0	0	1	0	0	0		2
ERBB3	ISTIRATUMAB	0	1	0	0	0	0	0	0	1	0	0	0	0	0	0	0	0	0	0	0		2
ERBB3	ELGEMTUMAB	0	1	0	0	0	0	0	0	1	0	0	0	0	0	0	0	0	0	0	0		2
ERBB3	SERIBANTUMAB	0	1	0	0	0	0	0	0	1	0	0	0	0	0	0	0	0	0	0	0		2
ERBB3	CETUXIMAB	0	0	0	0	0	1	0	0	0	0	0	0	0	0	0	0	0	0	0	0	25520391	2
ERBB3	DIMETHYLCURCUMIN	0	0	0	0	1	0	0	0	0	0	0	0	0	0	0	0	0	0	0	0	25753330	2
ERBB3	METHYLCURCUMIN	0	0	0	0	1	0	0	0	0	0	0	0	0	0	0	0	0	0	0	0	25753330	2
ERBB3	CURCUMIN	0	0	0	0	1	0	0	0	0	0	0	0	0	0	0	0	0	0	0	0	25753330	2
ERBB3	DOCETAXEL	0	0	0	0	0	0	0	0	0	1	0	0	0	0	0	0	0	0	0	0	30071039	2
ERBB3	TRAMETINIB	0	0	0	0	0	1	0	0	0	0	0	0	0	0	0	0	0	0	0	0	25952648	2
ERBB3	CARBOPLATIN	0	0	0	0	0	0	0	0	0	1	0	0	0	0	0	0	0	0	0	0	30071039	2
IL23A	BRIAKINUMAB	1	0	1	0	0	0	0	0	0	0	0	0	0	0	0	0	0	0	0	0		2
IL23A	TILDRAKIZUMAB	1	1	0	0	0	0	0	0	0	0	0	0	0	0	0	0	0	0	0	0		2
CYP27B1	DEFERASIROX	0	0	0	0	0	0	0	0	0	1	0	0	0	0	0	0	0	0	0	0	30651574	2
CYP27B1	CHEMBL2036072	0	0	0	0	1	0	0	0	0	0	0	0	0	0	0	0	0	0	0	0	22404326	2
CYP27B1	RIBAVIRIN	0	0	0	0	0	0	0	0	0	1	0	0	0	0	0	0	0	0	0	0	21145801	2
SH2B3	CANDESARTAN	0	0	0	0	0	0	0	0	0	1	0	0	0	0	0	0	0	0	0	0	31327267	2
GPR18	CANNABIDIOL	0	0	0	0	0	0	0	0	1	0	0	0	0	0	0	0	0	0	0	0	26264914	2
PRORP	ZILEUTON	0	0	0	0	0	0	0	0	0	1	0	0	0	0	0	0	0	0	0	0	25963335	2
NFKBIA	DIOSCIN	0	0	0	0	1	0	0	0	0	0	0	0	0	0	0	0	0	0	0	0	23621869	2
NFKBIA	CHEMBL401565	0	0	0	0	1	0	0	0	0	0	0	0	0	0	0	0	0	0	0	0	18088098	2
NFKBIA	PEPEROMIN E	0	0	0	0	1	0	0	0	0	0	0	0	0	0	0	0	0	0	0	0	19559609	2
NFKBIA	DEMETHYLWEDELOLACTONE	0	0	0	0	1	0	0	0	0	0	0	0	0	0	0	0	0	0	0	0	22926226	2
NFKBIA	CHEMBL1940084	0	0	0	0	1	0	0	0	0	0	0	0	0	0	0	0	0	0	0	0	22153345	2
NFKBIA	CHEMBL256967	0	0	0	0	1	0	0	0	0	0	0	0	0	0	0	0	0	0	0	0	18088098	2
NFKBIA	GAMBOGIC ACID	0	0	0	0	1	0	0	0	0	0	0	0	0	0	0	0	0	0	0	0	22472167	2
NFKBIA	GEFITINIB	0	0	0	0	0	0	0	0	0	1	0	0	0	0	0	0	0	0	0	0	31664190	2
NFKBIA	WEDELOLACTONE	0	0	0	0	1	0	0	0	0	0	0	0	0	0	0	0	0	0	0	0	22926226	2
FAM177A1	LITHIUM	0	0	0	0	0	0	0	0	0	1	0	0	0	0	0	0	0	0	0	0	29121268	2
HIF1A	PX-478	0	0	1	0	0	0	0	0	0	0	0	0	0	0	0	0	1	0	0	0		2
HIF1A	FUROSPONGOLIDE	0	0	0	0	1	0	0	0	0	0	0	0	0	0	0	0	0	0	0	0	18989978	2
HIF1A	PIMONIDAZOLE	0	0	0	0	0	0	1	0	0	0	0	0	0	0	0	0	0	0	0	0	12829158	2
HIF1A	EMETINE	0	0	0	0	1	0	0	0	0	0	0	0	0	0	0	0	0	0	0	0	15974627	2
HIF1A	CYCLOHEXIMIDE	0	0	0	0	1	0	0	0	0	0	0	0	0	0	0	0	0	0	0	0	15974627	2
HIF1A	KLUGINE	0	0	0	0	1	0	0	0	0	0	0	0	0	0	0	0	0	0	0	0	15974627	2
HIF1A	PUUPEHENONE	0	0	0	0	1	0	0	0	0	0	0	0	0	0	0	0	0	0	0	0	22928967	2
HIF1A	GELDANAMYCIN	0	0	0	0	0	0	1	0	0	0	0	0	0	0	0	0	0	0	0	0	12811834	2
HIF1A	TANESPIMYCIN	0	0	0	0	1	0	0	0	0	0	0	0	0	0	0	0	0	0	0	0	23153200	2
HIF1A	SORAFENIB	0	0	0	0	0	0	0	0	0	1	0	0	0	0	0	0	0	0	0	0	25816720	2
HIF1A	HALICLONADIAMINE	0	0	0	0	1	0	0	0	0	0	0	0	0	0	0	0	0	0	0	0	22928967	2
HIF1A	DEFEROXAMINE	0	0	0	0	0	0	1	0	0	0	0	0	0	0	0	0	0	0	0	0	15780758	2
HIF1A	AXITINIB	0	0	0	0	0	0	0	0	0	1	0	0	0	0	0	0	0	0	0	0	25816720	2
HIF1A	MANASSANTIN B	0	0	0	0	1	0	0	0	0	0	0	0	0	0	0	0	0	0	0	0	15165135	2
HIF1A	EPICATECHIN GALLATE	0	0	0	0	1	0	0	0	0	0	0	0	0	0	0	0	0	0	0	0	15620252	2
HIF1A	ISOCEPHAELINE	0	0	0	0	1	0	0	0	0	0	0	0	0	0	0	0	0	0	0	0	15974627	2
HIF1A	NEOPETROFORMYNE A	0	0	0	0	1	0	0	0	0	0	0	0	0	0	0	0	0	0	0	0	22928967	2
PRKCH	SOTRASTAURIN	1	0	0	0	0	0	0	0	1	0	0	0	0	0	0	0	0	0	0	0		2
SDF4	ALCOHOL	0	0	0	0	0	0	1	0	0	0	0	0	0	0	0	0	0	0	0	0	18355758	2
RASGRP1	PHORBOL MYRISTATE ACETATE	0	0	0	0	1	0	0	0	0	0	0	0	0	0	0	0	0	0	0	0	15588099	2
RASGRP1	BYROSTATIN 1	0	0	0	0	1	0	0	0	0	0	0	0	0	0	0	0	0	0	0	0	15588099	2
RORA	T091317	0	0	0	0	1	0	0	0	1	0	0	0	0	0	0	0	0	0	0	0		2
RORA	CITALOPRAM	0	0	0	0	0	0	0	0	0	1	0	0	0	0	0	0	0	0	0	0	19846067	2
SMAD3	DEXAMETHASONE	0	0	0	0	0	0	1	0	0	0	0	0	0	0	0	0	0	0	0	0	15817834	2
SMAD3	DEMETHOXYCURCUMIN	0	0	0	0	1	0	0	0	0	0	0	0	0	0	0	0	0	0	0	0	23145932	2
SMAD3	BISDEMETHOXYCURCUMIN	0	0	0	0	1	0	0	0	0	0	0	0	0	0	0	0	0	0	0	0	23145932	2
SMAD3	GENISTEIN	0	0	0	0	0	0	1	0	0	0	0	0	0	0	0	0	0	0	0	0	15963949	2
SMAD3	HALOFUGINONE	0	0	0	0	0	0	1	0	0	0	0	0	0	0	0	0	0	0	0	0	11874485	2
SMAD3	CURCUMIN	0	0	0	0	1	0	0	0	0	0	0	0	0	0	0	0	0	0	0	0	23145932	2
CLK3	HARMINE	0	0	0	0	1	0	0	0	0	0	0	0	0	0	0	0	0	0	0	0	22998443	2
CLK3	LEUCETTAMINE B	0	0	0	0	1	0	0	0	0	0	0	0	0	0	0	0	0	0	0	0	22998443	2
CSK	HESPERADIN	0	0	0	0	1	0	0	0	0	0	0	0	0	0	0	0	0	0	0	0	19035792	2
CSK	HYDROCHLOROTHIAZIDE	0	0	0	0	0	0	0	0	0	1	0	0	0	0	0	0	0	0	0	0	31327267	2
CYP11A1	MITOTANE	1	0	0	0	0	0	0	0	1	0	0	0	0	0	0	0	0	0	0	0		2
ULK3	HESPERADIN	0	0	0	0	1	0	0	0	0	0	0	0	0	0	0	0	0	0	0	0	19035792	2
ULK3	IMATINIB	0	0	0	0	0	0	0	0	0	1	0	0	0	0	0	0	0	0	0	0	15073101	2
FES	HESPERADIN	0	0	0	0	1	0	0	0	0	0	0	0	0	0	0	0	0	0	0	0	19035792	2
BLM	HYDROXYUREA	0	0	0	0	0	0	1	0	0	0	0	0	0	0	0	0	0	0	0	0	18504617	2
SOCS1	INSULIN	0	0	0	0	0	0	1	0	0	0	0	0	0	0	0	0	0	0	0	0	18171911	2
SOCS1	ALDESLEUKIN	0	0	0	0	0	0	1	0	0	0	0	0	0	0	0	0	0	0	0	0	12928391	2
PRKCB	SOTRASTAURIN	1	0	0	0	0	0	0	0	1	0	0	0	0	0	0	0	0	0	0	0		2
PRKCB	BISINDOLYLMALEIMIDE IX	0	0	0	0	1	0	0	0	0	0	0	0	0	0	0	0	0	0	0	0	25058929	2
PRKCB	ENOXOLONE	0	0	0	0	1	0	0	0	0	0	0	0	0	0	0	0	0	0	0	0	24461294	2
VKORC1	TECARFARIN	0	1	1	0	0	0	0	0	0	0	0	0	0	0	0	0	0	0	0	0		2
VKORC1	FLUINDIONE	0	0	0	0	0	0	0	0	0	1	0	0	0	0	0	0	0	0	0	0	21883387	2
STX1B	WARFARIN	0	0	0	0	0	0	0	0	0	1	0	0	0	0	0	0	0	0	0	0	27740732	2
CDH1	ERLOTINIB	0	0	0	0	0	0	0	1	0	0	0	0	0	0	0	0	0	0	0	0	26251290	2
CDH1	LAPATINIB	0	0	0	0	0	0	0	1	0	0	0	0	0	0	0	0	0	0	0	0	26487584	2
CDH1	SELUMETINIB	0	0	0	0	0	0	0	1	0	0	0	0	0	0	0	0	0	0	0	0	26251290	2
CDH1	CAPECITABINE	0	0	0	0	0	0	0	1	0	0	0	0	0	0	0	0	0	0	0	0	26487584	2
CDH1	VOLASERTIB	0	0	0	0	0	0	0	1	0	0	0	0	0	0	0	0	0	0	0	0	26597303	2
HAS3	HYDROCORTISONE	0	0	0	0	0	0	1	0	0	0	0	0	0	0	0	0	0	0	0	0	13130151	2
ERBB2	ALLITINIB	1	0	0	0	0	0	0	0	1	0	0	0	0	0	0	0	0	0	0	0		2
ERBB2	JNJ-26483327	1	1	0	0	0	0	0	0	0	0	0	0	0	0	0	0	0	0	0	0		2
ERBB2	PELITINIB	0	0	0	0	0	0	0	0	0	0	0	0	0	1	0	0	1	0	0	0		2
ERBB2	INSM-18	1	0	1	0	0	0	0	0	0	0	0	0	0	0	0	0	0	0	0	0		2
ERBB2	FLOXURIDINE	0	0	0	0	0	0	1	0	0	0	0	0	0	0	0	0	0	0	0	0	17177846	2
ERBB2	SIROLIMUS	0	0	0	0	0	1	0	0	0	0	0	0	0	0	0	0	0	0	0	0	19122144	2
ERBB2	ELGEMTUMAB	0	0	0	0	0	0	0	1	0	0	0	0	0	0	0	0	0	0	0	0	28539475	2
ERBB2	PONATINIB	0	0	0	0	0	0	0	1	0	0	0	0	0	0	0	0	0	0	0	0	26270481	2
ERBB2	METFORMIN	0	0	0	0	0	0	0	1	0	0	0	0	0	0	0	0	0	0	0	0	28375706	2
ERBB2	EMODIN	0	0	0	0	0	0	1	0	0	0	0	0	0	0	0	0	0	0	0	0	9671406	2
ERBB2	TALAZOPARIB	0	0	0	0	0	0	0	0	0	1	0	0	0	0	0	0	0	1	0	0		2
ERBB2	DIMETHYLCURCUMIN	0	0	0	0	1	0	0	0	0	0	0	0	0	0	0	0	0	0	0	0	25753330	2
ERBB2	VISTUSERTIB	0	0	0	0	0	0	0	1	0	0	0	0	0	0	0	0	0	0	0	0	25805799	2
ERBB2	IXABEPILONE	0	0	0	0	0	0	0	0	0	1	0	0	0	0	0	0	0	1	0	0		2
ERBB2	IRINOTECAN	0	0	0	0	0	1	0	0	0	0	0	0	0	0	0	0	0	0	0	0	25601188	2
ERBB2	PA-799	0	0	0	0	0	0	0	1	0	0	0	0	0	0	0	0	0	0	0	0	21558396	2
ERBB2	PANITUMUMAB	0	0	0	0	0	0	0	1	0	0	0	0	0	0	0	0	0	0	0	0	26243863	2
ERBB2	SORAFENIB	0	0	0	0	0	0	0	1	0	0	0	0	0	0	0	0	0	0	0	0	27992451	2
ERBB2	EPIRUBICIN	0	0	0	0	0	0	1	0	0	0	0	0	0	0	0	0	0	0	0	0	11759828	2
ERBB2	AT-13148	0	0	0	0	0	0	0	1	0	0	0	0	0	0	0	0	0	0	0	0	22781553	2
ERBB2	CHEMBL35482	0	0	0	0	0	0	1	0	0	0	0	0	0	0	0	0	0	0	0	0	10318905	2
ERBB2	DEPATUXIZUMAB MAFODOTIN	0	0	0	0	0	0	0	1	0	0	0	0	0	0	0	0	0	0	0	0	26846818	2
ERBB2	COPANLISIB	0	0	0	0	0	0	0	1	0	0	0	0	0	0	0	0	0	0	0	0	24170767	2
ERBB2	RIBOCICLIB	0	0	0	0	0	0	0	0	0	1	0	0	0	0	0	0	0	1	0	0		2
ERBB2	TEMSIROLIMUS	0	0	0	0	0	0	0	1	0	0	0	0	0	0	0	0	0	0	0	0	24323026	2
ERBB2	TRASTUZUMAB DERUXTECAN	0	0	0	0	0	0	0	1	0	0	0	0	0	0	0	0	0	0	0	0	27026201	2
ERBB2	LIFIRAFENIB	0	0	0	0	0	0	0	1	0	0	0	0	0	0	0	0	0	0	0	0	26208524	2
ERBB2	RG-4733	0	0	0	0	0	0	0	1	0	0	0	0	0	0	0	0	0	0	0	0	27556950	2
ERBB2	PLUMBAGIN	0	0	0	0	1	0	0	0	0	0	0	0	0	0	0	0	0	0	0	0	24355130	2
ERBB2	NAKIJIQUINONES H	0	0	0	0	1	0	0	0	0	0	0	0	0	0	0	0	0	0	0	0	18676149	2
ERBB2	ERIBULIN	0	0	0	0	0	0	0	0	0	1	0	0	0	0	0	0	0	1	0	0		2
ERBB2	FIMEPINOSTAT	0	0	0	0	0	0	0	1	0	0	0	0	0	0	0	0	0	0	0	0	22693356	2
ERBB2	ERTUMAXOMAB	1	1	0	0	0	0	0	0	0	0	0	0	0	0	0	0	0	0	0	0		2
ERBB2	CURCUMIN	0	0	0	0	1	0	0	0	0	0	0	0	0	0	0	0	0	0	0	0	25753330	2
ERBB2	T-DM1	0	0	0	0	0	0	0	1	0	0	0	0	0	0	0	0	0	0	0	0	27052654	2
ERBB2	EPIGALOCATECHIN GALLATE	0	0	0	0	1	0	0	0	0	0	0	0	0	0	0	0	0	0	0	0	24456004	2
ERBB2	HYDROCORTISONE	0	0	0	0	0	0	1	0	0	0	0	0	0	0	0	0	0	0	0	0	7909787	2
ERBB2	NAKIJIQUINONE I	0	0	0	0	1	0	0	0	0	0	0	0	0	0	0	0	0	0	0	0	18676149	2
ERBB2	METHYLCURCUMIN	0	0	0	0	1	0	0	0	0	0	0	0	0	0	0	0	0	0	0	0	25753330	2
ERBB2	AZD-8055	0	0	0	0	0	0	0	1	0	0	0	0	0	0	0	0	0	0	0	0	25436981	2
ERBB2	PKI-179	0	0	0	0	0	0	0	1	0	0	0	0	0	0	0	0	0	0	0	0	20797855	2
ERBB2	IRESSA	0	0	0	0	0	0	1	0	0	0	0	0	0	0	0	0	0	0	0	0	16470840	2
ERBB2	TRODUSQUEMINE	0	0	0	0	0	0	0	1	0	0	0	0	0	0	0	0	0	0	0	0	24845231	2
ERBB2	IPATASERTIB	0	0	0	0	0	0	0	1	0	0	0	0	0	0	0	0	0	0	0	0	24141624	2
ERBB2	EXEMESTANE	0	0	0	0	0	0	0	1	0	0	0	0	0	0	1	0	0	0	0	0		2
ERBB2	CHLORAMBUCIL	0	0	0	0	0	0	1	0	0	0	0	0	0	0	0	0	0	0	0	0	11691913	2
ERBB2	ALPELISIB	0	0	0	0	0	0	0	0	0	1	0	0	0	0	0	0	0	1	0	0		2
ERBB2	VS-5584	0	0	0	0	0	0	0	1	0	0	0	0	0	0	0	0	0	0	0	0	23270925	2
ERBB2	ONARTUZUMAB	0	0	0	0	0	0	0	1	0	0	0	0	0	0	0	0	0	0	0	0	27918764	2
ERBB2	DIETHYLSTILBESTROL	0	0	0	0	0	0	1	0	0	0	0	0	0	0	0	0	0	0	0	0	14647453	2
ERBB2	NAKIJIQUINONES G	0	0	0	0	1	0	0	0	0	0	0	0	0	0	0	0	0	0	0	0	18676149	2
ERBB2	RAMUCIRUMAB	0	0	0	0	0	0	0	1	0	0	0	0	0	0	0	0	0	0	0	0	25185099	2
ERBB2	CI-1040	0	0	0	0	0	0	0	1	0	0	0	0	0	0	0	0	0	0	0	0	23948973	2
ERBB2	GANCICLOVIR	0	0	0	0	0	0	1	0	0	0	0	0	0	0	0	0	0	0	0	0	8986436	2
ERBB2	SUNITINIB	0	0	0	0	0	0	0	1	0	0	0	0	0	0	0	0	0	0	0	0	24606768	2
ERBB2	ROMIDEPSIN	0	0	0	0	0	0	1	0	0	0	0	0	0	0	0	0	0	0	0	0	11929951	2
ERBB2	URACIL	0	0	0	0	0	0	1	0	0	0	0	0	0	0	0	0	0	0	0	0	1682063	2
ERBB2	ANTHRAQUINONE	0	0	0	0	0	0	1	0	0	0	0	0	0	0	0	0	0	0	0	0	16357514	2
ERBB2	TIVOZANIB	0	0	0	0	0	0	0	1	0	0	0	0	0	0	0	0	0	0	0	0	25995436	2
ERBB2	FILGRASTIM	0	0	0	0	0	0	1	0	0	0	0	0	0	0	0	0	0	0	0	0	16549824	2
ERBB2	SELUMETINIB	0	0	0	0	0	0	0	1	0	0	0	0	0	0	0	0	0	0	0	0	24971884	2
PPP1R1B	FLUOXETINE	0	0	0	0	0	0	1	0	0	0	0	0	0	0	0	0	0	0	0	0	17125745	2
RARA	TRIFAROTENE	0	0	0	0	0	0	0	0	1	0	0	0	0	0	0	0	0	0	0	0	29974453	2
RARA	NRX195183	1	1	0	0	0	0	0	0	0	0	0	0	0	0	0	0	0	0	0	0		2
RARA	CHEMBL275311	0	0	0	0	1	0	0	0	0	0	0	0	0	0	0	0	0	0	0	0	18951029	2
RARA	ABIETIC ACID	0	0	0	0	1	0	0	0	0	0	0	0	0	0	0	0	0	0	0	0	24799257	2
RARA	PIMARIC ACID	0	0	0	0	1	0	0	0	0	0	0	0	0	0	0	0	0	0	0	0	24799257	2
RARA	DEXAMETHASONE	0	0	0	0	0	0	1	0	0	0	0	0	0	0	0	0	0	0	0	0	8606853	2
RARA	CETUXIMAB	0	0	0	0	0	0	1	0	0	0	0	0	0	0	0	0	0	0	0	0	8857944	2
RARA	DIMETHYL SULFOXIDE	0	0	0	0	0	0	1	0	0	0	0	0	0	0	0	0	0	0	0	0	9067579	2
RARA	MELATONIN	0	0	0	0	0	0	1	0	0	0	0	0	0	0	0	0	0	0	0	0	15813899	2
RARA	INSULIN	0	0	0	0	0	0	1	0	0	0	0	0	0	0	0	0	0	0	0	0	9329777	2
RARA	LYCOPENE	0	0	0	0	0	0	1	0	0	0	0	0	0	0	0	0	0	0	0	0	11437362	2
RARA	GERONTOXANTHONE H	0	0	0	0	1	0	0	0	0	0	0	0	0	0	0	0	0	0	0	0	25838141	2
RARA	CHEMBL472172	0	0	0	0	1	0	0	0	0	0	0	0	0	0	0	0	0	0	0	0	18702457	2
RARA	GERONTOXANTHONE B	0	0	0	0	1	0	0	0	0	0	0	0	0	0	0	0	0	0	0	0	25838141	2
RARA	NALOXONE	0	0	0	0	0	0	1	0	0	0	0	0	0	0	0	0	0	0	0	0	14741437	2
RARA	GERONTOXANTHONE A	0	0	0	0	1	0	0	0	0	0	0	0	0	0	0	0	0	0	0	0	25838141	2
RARA	RETINOL	0	0	0	0	1	0	0	0	0	0	0	0	0	0	0	0	0	0	0	0	18511283	2
RARA	TRIBUTYRIN	0	0	0	0	0	0	1	0	0	0	0	0	0	0	0	0	0	0	0	0	11593538	2
RARA	RETINYLRETINOATE	0	0	0	0	1	0	0	0	0	0	0	0	0	0	0	0	0	0	0	0	18511283	2
TOP2A	AMRUBICIN	1	0	0	0	0	0	0	0	0	0	0	0	0	0	0	0	0	0	0	0	17628745	2
TOP2A	C-1311	1	0	1	0	0	0	0	0	0	0	0	0	0	0	0	0	0	0	0	0		2
TOP2A	VOSAROXIN	1	0	1	0	0	0	0	0	0	0	0	0	0	0	0	0	0	0	0	0		2
TOP2A	BECATECARIN	1	0	1	0	0	0	0	0	0	0	0	0	0	0	0	0	0	0	0	0		2
TOP2A	CHEMBL607534	0	0	0	0	1	0	0	0	0	0	0	0	0	0	0	0	0	0	0	0	19783445	2
TOP2A	UNGEREMINE	0	0	0	0	1	0	0	0	0	0	0	0	0	0	0	0	0	0	0	0	22014547	2
TOP2A	MAKALUVAMINE C TFA SALT	0	0	0	0	1	0	0	0	0	0	0	0	0	0	0	0	0	0	0	0	8691207	2
TOP2A	DIGITOXIN	0	0	0	0	1	0	0	0	0	0	0	0	0	0	0	0	0	0	0	0	16309315	2
TOP2A	VINCRISTINE	0	0	0	0	0	0	1	0	0	0	0	0	0	0	0	0	0	0	0	0	9494516	2
TOP2A	CHEMBL593570	0	0	0	0	1	0	0	0	0	0	0	0	0	0	0	0	0	0	0	0	19783445	2
TOP2A	CAMPTOTHECIN	0	0	0	0	0	0	1	0	0	0	0	0	0	0	0	0	0	0	0	0	11205246	2
TOP2A	DEMETHYLZEYLASTERONE	0	0	0	0	1	0	0	0	0	0	0	0	0	0	0	0	0	0	0	0	11678653	2
TOP2A	MAKALUVAMINE F	0	0	0	0	1	0	0	0	0	0	0	0	0	0	0	0	0	0	0	0	8691207	2
TOP2A	CHEMBL1773343	0	0	0	0	1	0	0	0	0	0	0	0	0	0	0	0	0	0	0	0	21489802	2
TOP2A	CHEMBL594257	0	0	0	0	1	0	0	0	0	0	0	0	0	0	0	0	0	0	0	0	19783445	2
TOP2A	MAKALUVAMINE A	0	0	0	0	1	0	0	0	0	0	0	0	0	0	0	0	0	0	0	0	8691207	2
TOP2A	DIAZIRINE	0	0	0	0	1	0	0	0	0	0	0	0	0	0	0	0	0	0	0	0	20006518	2
TOP2A	CHEMBL2023733	0	0	0	0	1	0	0	0	0	0	0	0	0	0	0	0	0	0	0	0	22276998	2
TOP2A	DIPHYLLIN	0	0	0	0	1	0	0	0	0	0	0	0	0	0	0	0	0	0	0	0	22119124	2
TOP2A	OLEANDEROLIDE	0	0	0	0	1	0	0	0	0	0	0	0	0	0	0	0	0	0	0	0	24326278	2
TOP2A	BETULIN	0	0	0	0	1	0	0	0	0	0	0	0	0	0	0	0	0	0	0	0	11754608	2
TOP2A	CHEMBL2171812	0	0	0	0	1	0	0	0	0	0	0	0	0	0	0	0	0	0	0	0	22867019	2
TOP2A	CHEMBL594259	0	0	0	0	1	0	0	0	0	0	0	0	0	0	0	0	0	0	0	0	19783445	2
TOP2A	MAKALUVAMINE E	0	0	0	0	1	0	0	0	0	0	0	0	0	0	0	0	0	0	0	0	8691207	2
TOP2A	TRICITRINOL B	0	0	0	0	1	0	0	0	0	0	0	0	0	0	0	0	0	0	0	0	21761866	2
TOP2A	KAEMPFERITRIN	0	0	0	0	1	0	0	0	0	0	0	0	0	0	0	0	0	0	0	0	22014228	2
TOP2A	FISETIN	0	0	0	0	1	0	0	0	0	0	0	0	0	0	0	0	0	0	0	0	8759170	2
TOP2A	FRANGULIN B	0	0	0	0	1	0	0	0	0	0	0	0	0	0	0	0	0	0	0	0	20561793	2
TOP2A	4'-O-ACETYLPATENTIFLORIN B	0	0	0	0	1	0	0	0	0	0	0	0	0	0	0	0	0	0	0	0	22119124	2
TOP2A	CHEMBL2171781	0	0	0	0	1	0	0	0	0	0	0	0	0	0	0	0	0	0	0	0	22867019	2
TOP2A	HURATOXIN	0	0	0	0	1	0	0	0	0	0	0	0	0	0	0	0	0	0	0	0	24931277	2
TOP2A	LYCOBETAINE	0	0	0	0	1	0	0	0	0	0	0	0	0	0	0	0	0	0	0	0	23266176	2
TOP2A	SIMOCYCLINONE D8	0	0	0	0	1	0	0	0	0	0	0	0	0	0	0	0	0	0	0	0	22867097	2
TOP2A	ELINAFIDE	0	0	0	0	1	0	0	0	0	0	0	0	0	0	0	0	0	0	0	0	21880496	2
TOP2A	CHEMBL507986	0	0	0	0	1	0	0	0	0	0	0	0	0	0	0	0	0	0	0	0	21391686	2
TOP2A	CHEMBL594695	0	0	0	0	1	0	0	0	0	0	0	0	0	0	0	0	0	0	0	0	19783445	2
TOP2A	CHEMBL594153	0	0	0	0	1	0	0	0	0	0	0	0	0	0	0	0	0	0	0	0	19783445	2
TOP2A	CHEMBL2171794	0	0	0	0	1	0	0	0	0	0	0	0	0	0	0	0	0	0	0	0	22867019	2
TOP2A	ADRIAMYCIN	0	0	0	0	0	0	1	0	0	0	0	0	0	0	0	0	0	0	0	0	9494516	2
TOP2A	LUPEOL	0	0	0	0	1	0	0	0	0	0	0	0	0	0	0	0	0	0	0	0	11754608	2
TOP2A	CHEMBL1080077	0	0	0	0	1	0	0	0	0	0	0	0	0	0	0	0	0	0	0	0	19691293	2
TOP2A	CHEMBL244268	0	0	0	0	1	0	0	0	0	0	0	0	0	0	0	0	0	0	0	0	17658777	2
TOP2A	CHEMBL596082	0	0	0	0	1	0	0	0	0	0	0	0	0	0	0	0	0	0	0	0	19783445	2
TOP2A	CHEMBL594379	0	0	0	0	1	0	0	0	0	0	0	0	0	0	0	0	0	0	0	0	19783445	2
TOP2A	HYDROQUINONE	0	0	0	0	0	0	1	0	0	0	0	0	0	0	0	0	0	0	0	0	15833037	2
STAT5A	AZD-1480	0	0	0	0	1	0	0	0	0	0	0	0	0	0	0	0	0	0	0	0	21138246	2
STAT5B	EPOETIN ALFA	0	0	0	0	0	0	1	0	0	0	0	0	0	0	0	0	0	0	0	0	9195960	2
STAT5B	TOFACITINIB	0	0	0	0	1	0	0	0	0	0	0	0	0	0	0	0	0	0	0	0	14593182	2
STAT3	CUCURBITACIN E	0	0	0	0	1	0	0	0	0	0	0	0	0	0	0	0	0	0	0	0	20347305	2
STAT3	COSMOMYCIN C	0	0	0	0	1	0	0	0	0	0	0	0	0	0	0	0	0	0	0	0	22071520	2
STAT3	CHEMBL2062862	0	0	0	0	1	0	0	0	0	0	0	0	0	0	0	0	0	0	0	0	26331426	2
STAT3	PYRIMETHAMINE	0	0	0	0	1	0	0	0	0	0	0	0	0	0	0	0	0	0	0	0	25984755	2
STAT3	BARDOXOLONE METHYL	0	0	0	0	1	0	0	0	0	0	0	0	0	0	0	0	0	0	0	0	25675144	2
STAT3	CELECOXIB	0	0	0	0	1	0	0	0	0	0	0	0	0	0	0	0	0	0	0	0	21678971	2
STAT3	CHEMBL2062869	0	0	0	0	1	0	0	0	0	0	0	0	0	0	0	0	0	0	0	0	26331426	2
STAT3	CHEMBL2062863	0	0	0	0	1	0	0	0	0	0	0	0	0	0	0	0	0	0	0	0	26331426	2
STAT3	CHEMBL2062868	0	0	0	0	1	0	0	0	0	0	0	0	0	0	0	0	0	0	0	0	26331426	2
STAT3	OCHROMYCINONE	0	0	0	0	1	0	0	0	0	0	0	0	0	0	0	0	0	0	0	0	18006313	2
STAT3	CUCURBITACIN B	0	0	0	0	1	0	0	0	0	0	0	0	0	0	0	0	0	0	0	0	20347305	2
STAT3	CIGLITAZONE	0	0	0	0	1	0	0	0	0	0	0	0	0	0	0	0	0	0	0	0	20170185	2
COIL	EPIGALOCATECHIN GALLATE	0	0	0	0	0	0	1	0	0	0	0	0	0	0	0	0	0	0	0	0	16046615	2
SMAD7	ALTEPLASE	0	0	0	0	0	0	1	0	0	0	0	0	0	0	0	0	0	0	0	0	15033458	2
KISS1R	BENZETHONIUM CHLORIDE	0	0	0	0	1	0	0	0	0	0	0	0	0	0	0	0	0	0	0	0	17266198	2
STK11	TOZASERTIB	0	0	0	0	1	0	0	0	0	0	0	0	0	0	0	0	0	0	0	0	19035792	2
STK11	AMPKINONE	0	0	0	0	1	0	0	0	0	0	0	0	0	0	0	0	0	0	0	0	20873794	2
STK11	VOXTALISIB	0	0	0	0	0	0	0	1	0	0	0	0	0	0	0	0	0	0	0	0	24634413	2
STK11	PILARALISIB	0	0	0	0	0	0	0	1	0	0	0	0	0	0	0	0	0	0	0	0	25637314	2
STK11	CI-1040	0	0	0	0	0	0	0	1	0	0	0	0	0	0	0	0	0	0	0	0	27821489	2
STK11	PEMBROLIZUMAB	0	0	0	0	0	1	0	0	0	0	0	0	0	0	0	0	0	0	0	0	29773717	2
STK11	TRAMETINIB	0	0	0	0	0	0	0	1	0	0	0	0	0	0	0	0	0	0	0	0	27821489	2
STK11	PD-0325901	0	0	0	0	0	0	0	1	0	0	0	0	0	0	0	0	0	0	0	0	27821489	2
STK11	CHEMBL589258	0	0	0	0	0	0	0	1	0	0	0	0	0	0	0	0	0	0	0	0	20371716	2
STK11	CISPLATIN	0	0	0	0	0	0	0	1	0	0	0	0	0	0	0	0	0	0	0	0	28652249	2
STK11	SAPANISERTIB	0	0	0	0	0	0	0	1	0	0	0	0	0	0	0	0	0	0	0	0	26574479	2
STK11	PICTILISIB	0	0	0	0	0	0	0	1	0	0	0	0	0	0	0	0	0	0	0	0	24322983	2
STK11	ATEZOLIZUMAB	0	0	0	0	0	1	0	0	0	0	0	0	0	0	0	0	0	0	0	0	29773717	2
STK11	SIROLIMUS	0	0	0	0	0	0	0	1	0	0	0	0	0	0	0	0	0	0	0	0	20142330	2
STK11	NIVOLUMAB	0	0	0	0	0	1	0	0	0	0	0	0	0	0	0	0	0	0	0	0	29773717	2
STK11	GEDATOLISIB	0	0	0	0	0	0	0	1	0	0	0	0	0	0	0	0	0	0	0	0	21325073	2
STK11	AZD-8055	0	0	0	0	0	0	0	1	0	0	0	0	0	0	0	0	0	0	0	0	25436981	2
STK11	ADAVOSERTIB	0	0	0	0	0	0	0	1	0	0	0	0	0	0	0	0	0	0	0	0	28652249	2
GRIN3B	INDANTADOL	1	0	1	0	0	0	0	0	0	0	0	0	0	0	0	0	0	0	0	0		2
GRIN3B	CNS-5161	1	0	1	0	0	0	0	0	0	0	0	0	0	0	0	0	0	0	0	0		2
GRIN3B	LANICEMINE	1	0	1	0	0	0	0	0	0	0	0	0	0	0	0	0	0	0	0	0		2
GRIN3B	ESKETAMINE HYDROCHLORIDE	1	0	1	0	0	0	0	0	0	0	0	0	0	0	0	0	0	0	0	0		2
ELANE	CHEMBL310871	0	0	0	0	1	0	0	0	0	0	0	0	0	0	0	0	0	0	0	0	17535802	2
ELANE	NICOTINE	0	0	0	0	0	0	1	0	0	0	0	0	0	0	0	0	0	0	0	0	8912774	2
ELANE	SYMPLOSTATIN 5	0	0	0	0	1	0	0	0	0	0	0	0	0	0	0	0	0	0	0	0	23350733	2
C3	COMPSTATIN	0	0	0	0	1	0	0	0	0	0	0	0	0	0	0	0	0	0	0	0	25494040	2
C3	CLOZAPINE	0	0	0	0	0	0	0	0	0	1	0	0	0	0	0	0	0	0	0	0	26503818	2
CDC37	SODIUM MOLYBDATE	0	0	0	0	1	0	0	0	0	0	0	0	0	0	0	0	0	0	0	0	21486005	2
CDC37	GELDANAMYCIN	0	0	0	0	1	0	0	0	0	0	0	0	0	0	0	0	0	0	0	0	21486005	2
TYK2	HESPERADIN	0	0	0	0	1	0	0	0	0	0	0	0	0	0	0	0	0	0	0	0	19035792	2
TYK2	BREPOCITINIB	0	1	0	0	0	0	0	0	1	0	0	0	0	0	0	0	0	0	0	0		2
TYK2	PEFICITINIB	1	0	0	0	0	0	0	0	1	0	0	0	0	0	0	0	0	0	0	0		2
TYK2	CERDULATINIB	1	0	0	0	0	0	0	0	1	0	0	0	0	0	0	0	0	0	0	0		2
TYK2	JNJ-7706621	0	0	0	0	1	0	0	0	0	0	0	0	0	0	0	0	0	0	0	0	21106455	2
TYK2	ALDESLEUKIN	0	0	0	0	0	0	1	0	0	0	0	0	0	0	0	0	0	0	0	0	7528775	2
ICAM1	LIFITEGRAST	0	1	0	0	1	0	0	0	0	0	0	0	0	0	0	0	0	0	0	0		2
ICAM1	ALICAFORSEN	0	1	1	0	0	0	0	0	0	0	0	0	0	0	0	0	0	0	0	0		2
ILF3	CYCLOSPORINE	0	0	0	0	0	0	1	0	0	0	0	0	0	0	0	0	0	0	0	0	9843854	2
ILF3	ALDESLEUKIN	0	0	0	0	0	0	1	0	0	0	0	0	0	0	0	0	0	0	0	0	12504009	2
CDKN2D	ROMIDEPSIN	0	0	0	0	0	0	1	0	0	0	0	0	0	0	0	0	0	0	0	0	11753657	2
S1PR5	ASP-4058	0	1	0	0	0	0	0	0	1	0	0	0	0	0	0	0	0	0	0	0		2
PIK3R2	PF-04691502	1	0	0	0	0	0	0	0	0	0	0	0	0	1	0	0	0	0	0	0		2
PIK3R2	OMIPALISIB	1	0	0	0	0	0	0	0	0	0	1	0	0	0	0	0	0	0	0	0		2
PIK3R2	BUPARLISIB	1	0	0	0	0	0	0	0	0	0	0	0	0	1	0	0	0	0	0	0		2
PIK3R2	APITOLISIB	1	0	0	0	0	0	0	0	0	0	0	0	0	1	0	0	0	0	0	0		2
PIK3R2	PILARALISIB	1	0	0	0	0	0	0	0	0	0	0	0	0	1	0	0	0	0	0	0		2
PIK3R2	VOXTALISIB	1	0	0	0	0	0	0	0	0	0	0	0	0	1	0	0	0	0	0	0		2
PIK3R2	PICTILISIB	1	0	0	0	0	0	0	0	0	0	0	0	0	1	0	0	0	0	0	0		2
PIK3R2	ALPELISIB	0	0	0	0	0	0	0	0	0	0	1	0	0	1	0	0	0	0	0	0		2
PIK3R2	VEMURAFENIB	0	0	0	0	0	1	0	0	0	0	0	0	0	0	0	0	0	0	0	0	24265155	2
DBP	ALBUMIN HUMAN	0	0	0	0	0	0	1	0	0	0	0	0	0	0	0	0	0	0	0	0	2331750	2
FUT2	ALCOHOL	0	0	0	0	0	0	0	0	0	1	0	0	0	0	0	0	0	0	0	0	32451486	2
BAX	ESTRAMUSTINE	0	0	0	0	0	0	1	0	0	0	0	0	0	0	0	0	0	0	0	0	15869997	2
BAX	BCG VACCINE	0	0	0	0	0	0	1	0	0	0	0	0	0	0	0	0	0	0	0	0	9393826	2
BAX	QUERCETIN	0	0	0	0	0	0	1	0	0	0	0	0	0	0	0	0	0	0	0	0	15741050	2
BAX	MEDROXYPROGESTERONE ACETATE	0	0	0	0	0	0	1	0	0	0	0	0	0	0	0	0	0	0	0	0	15885761	2
BAX	PHENYLEPHRINE	0	0	0	0	0	0	1	0	0	0	0	0	0	0	0	0	0	0	0	0	10220693	2
BAX	OXYTOCIN	0	0	0	0	0	0	1	0	0	0	0	0	0	0	0	0	0	0	0	0	15590985	2
BAX	DOCETAXEL	0	0	0	0	0	0	1	0	0	0	0	0	0	0	0	0	0	0	0	0	15641988	2
BAX	NICOTINE	0	0	0	0	0	0	1	0	0	0	0	0	0	0	0	0	0	0	0	0	15225679	2
BAX	ROFECOXIB	0	0	0	0	0	0	1	0	0	0	0	0	0	0	0	0	0	0	0	0	14627349	2
BAX	LEUCOVORIN	0	0	0	0	0	0	1	0	0	0	0	0	0	0	0	0	0	0	0	0	11237386	2
BAX	PHENOBARBITAL	0	0	0	0	0	0	1	0	0	0	0	0	0	0	0	0	0	0	0	0	9230198	2
BAX	ANDROSTENEDIONE	0	0	0	0	0	0	1	0	0	0	0	0	0	0	0	0	0	0	0	0	15590985	2
BAX	PREDNISOLONE	0	0	0	0	0	0	1	0	0	0	0	0	0	0	0	0	0	0	0	0	12730678	2
BAX	O-CHLOROACETYLCARBAMOYLFUMAGILLOL	0	0	0	0	0	0	1	0	0	0	0	0	0	0	0	0	0	0	0	0	10481942	2
BAX	SIROLIMUS	0	0	0	0	0	0	1	0	0	0	0	0	0	0	0	0	0	0	0	0	15782132	2
BAX	DOXORUBICIN	0	0	0	0	0	0	1	0	0	0	0	0	0	0	0	0	0	0	0	0	12040435	2
BAX	FLUDARABINE	0	0	0	0	0	0	1	0	0	0	0	0	0	0	0	0	0	0	0	0	12040435	2
BAX	VERAPAMIL	0	0	0	0	0	0	1	0	0	0	0	0	0	0	0	0	0	0	0	0	9354939	2
BAX	LAPACHONE	0	0	0	0	0	0	1	0	0	0	0	0	0	0	0	0	0	0	0	0	15753997	2
BAX	METHOTREXATE	0	0	0	0	0	0	1	0	0	0	0	0	0	0	0	0	0	0	0	0	11237386	2
BAX	SULFORAPHANE	0	0	0	0	0	0	1	0	0	0	0	0	0	0	0	0	0	0	0	0	15753404	2
BAX	PROCARBAZINE	0	0	0	0	0	0	1	0	0	0	0	0	0	0	0	0	0	0	0	0	11839668	2
BAX	CISPLATIN	0	0	0	0	0	0	1	0	0	0	0	0	0	0	0	0	0	0	0	0	15790433	2
BAX	SODIUM CHLORIDE	0	0	0	0	0	0	1	0	0	0	0	0	0	0	0	0	0	0	0	0	15641688	2
BAX	MELATONIN	0	0	0	0	0	0	1	0	0	0	0	0	0	0	0	0	0	0	0	0	15205854	2
BAX	ERYTHROMYCIN	0	0	0	0	0	0	1	0	0	0	0	0	0	0	0	0	0	0	0	0	17007374	2
BAX	DACARBAZINE	0	0	0	0	0	0	1	0	0	0	0	0	0	0	0	0	0	0	0	0	14512787	2
BAX	LEVODOPA	0	0	0	0	0	0	1	0	0	0	0	0	0	0	0	0	0	0	0	0	15672541	2
BAX	ETOPOSIDE	0	0	0	0	0	0	1	0	0	0	0	0	0	0	0	0	0	0	0	0	15454884	2
BAX	KERACYANIN	0	0	0	0	1	0	0	0	0	0	0	0	0	0	0	0	0	0	0	0	17360708	2
BAX	CAMPTOTHECIN	0	0	0	0	0	0	1	0	0	0	0	0	0	0	0	0	0	0	0	0	9398050	2
BAX	BICALUTAMIDE	0	0	0	0	0	0	1	0	0	0	0	0	0	0	0	0	0	0	0	0	11845989	2
BAX	CILMOSTIM	0	0	0	0	0	0	1	0	0	0	0	0	0	0	0	0	0	0	0	0	10770207	2
BAX	PRASTERONE	0	0	0	0	0	0	1	0	0	0	0	0	0	0	0	0	0	0	0	0	9177459	2
BAX	VINORELBINE	0	0	0	0	0	0	1	0	0	0	0	0	0	0	0	0	0	0	0	0	11720482	2
BAX	ANDROSTANOLONE	0	0	0	0	0	0	1	0	0	0	0	0	0	0	0	0	0	0	0	0	15517879	2
BAX	CYCLOPHOSPHAMIDE	0	0	0	0	0	0	1	0	0	0	0	0	0	0	0	0	0	0	0	0	14767525	2
BAX	NALTREXONE	0	0	0	0	0	0	1	0	0	0	0	0	0	0	0	0	0	0	0	0	16716514	2
BAX	ERBITUX	0	0	0	0	0	0	1	0	0	0	0	0	0	0	0	0	0	0	0	0	12850474	2
BAX	FLUOROURACIL	0	0	0	0	0	0	1	0	0	0	0	0	0	0	0	0	0	0	0	0	15641988	2
BAX	RETINOL	0	0	0	0	0	0	1	0	0	0	0	0	0	0	0	0	0	0	0	0	17202653	2
BAX	ATENOLOL	0	0	0	0	0	0	1	0	0	0	0	0	0	0	0	0	0	0	0	0	16995309	2
BAX	PRAVASTATIN	0	0	0	0	0	0	1	0	0	0	0	0	0	0	0	0	0	0	0	0	16540096	2
DNMT3A	WARFARIN	0	0	0	0	0	0	0	0	0	1	0	0	0	0	0	0	0	0	0	0	27740732	2
DNMT3A	IDARUBICIN	0	0	0	0	0	1	0	0	0	0	0	0	0	0	0	0	0	0	0	0	22081665	2
IL1R1	EPOETIN ALFA	0	0	0	0	0	0	1	0	0	0	0	0	0	0	0	0	0	0	0	0	16337691	2
IL1R1	GENISTEIN	0	0	0	0	0	0	1	0	0	0	0	0	0	0	0	0	0	0	0	0	10400830	2
IL1R1	AMMONIUM TRICHLOROTELLURATE	0	0	0	0	0	0	1	0	0	0	0	0	0	0	0	0	0	0	0	0	7539780	2
IL1R1	ALCOHOL	0	0	0	0	0	0	1	0	0	0	0	0	0	0	0	0	0	0	0	0	16272348	2
MAP4K4	CEP-1347	0	0	0	0	1	0	0	0	0	0	0	0	0	0	0	0	0	0	0	0	24044867	2
BCL2L11	KERACYANIN	0	0	0	0	1	0	0	0	0	0	0	0	0	0	0	0	0	0	0	0	17360708	2
ITGA4	FIRATEGRAST	1	0	1	0	0	0	0	0	0	0	0	0	0	0	0	0	0	0	0	0		2
APH1A	AVAGACESTAT	1	0	1	0	0	0	0	0	0	0	0	0	0	0	0	0	0	0	0	0		2
APH1A	IC261	0	0	0	0	1	0	0	0	0	0	0	0	0	0	0	0	0	0	0	0	20350806	2
CA14	ACETAZOLAMIDE	0	0	0	0	0	0	0	0	1	0	0	0	0	0	0	0	0	0	0	0	10592235	2
CA14	ETHOXZOLAMIDE	1	0	0	0	0	0	0	0	1	0	0	0	0	0	0	0	0	0	0	0		2
RORC	T091317	0	0	0	0	1	0	0	0	1	0	0	0	0	0	0	0	0	0	0	0		2
CASP8	EMRICASAN	1	0	0	0	0	0	0	0	1	0	0	0	0	0	0	0	0	0	0	0		2
CASP8	CONATUMUMAB	0	0	0	0	0	1	0	0	0	0	0	0	0	0	0	0	0	0	0	0	26291055	2
CASP8	CHEMBL375563	0	0	0	0	1	0	0	0	0	0	0	0	0	0	0	0	0	0	0	0	17261067	2
CD28	PROGESTERONE	0	0	0	0	0	0	1	0	0	0	0	0	0	0	0	0	0	0	0	0	11903384	2
CD28	CHEMBL445304	0	0	0	0	1	0	0	0	0	0	0	0	0	0	0	0	0	0	0	0	18003900	2
CD28	GELDANAMYCIN	0	0	0	0	0	0	1	0	0	0	0	0	0	0	0	0	0	0	0	0	9747895	2
CD28	ALDESLEUKIN	0	0	0	0	0	0	1	0	0	0	0	0	0	0	0	0	0	0	0	0	2156582	2
CTLA4	BLEOMYCIN	0	0	0	0	0	0	1	0	0	0	0	0	0	0	0	0	0	0	0	0	11489978	2
CTLA4	PREDNISONE	0	0	0	0	0	0	0	0	0	1	0	0	0	0	0	0	0	0	0	0	21228734	2
CTLA4	ATEZOLIZUMAB	0	0	0	0	0	1	0	0	0	0	0	0	0	0	0	0	0	0	0	0	25428504	2
CTLA4	BORTEZOMIB	0	0	0	0	0	0	0	0	0	1	0	0	0	0	0	0	0	0	0	0	21228734	2
CTLA4	ABATACEPT	0	0	0	0	0	0	1	0	0	0	0	0	0	0	0	0	0	0	0	0	9758890	2
CTLA4	METHIMAZOLE	0	0	0	0	0	0	1	0	0	0	0	0	0	0	0	0	0	0	0	0	15504312	2
CTLA4	DEXAMETHASONE	0	0	0	0	0	0	0	0	0	1	0	0	0	0	0	0	0	0	0	0	21228734	2
CTLA4	THALIDOMIDE	0	0	0	0	0	0	1	0	0	0	0	0	0	0	0	0	0	0	0	0	10823791	2
CTLA4	MELPHALAN	0	0	0	0	0	0	0	0	0	1	0	0	0	0	0	0	0	0	0	0	21228734	2
CTLA4	WORTMANNIN	0	0	0	0	0	0	1	0	0	0	0	0	0	0	0	0	0	0	0	0	10464177	2
CTLA4	ANTIBIOTIC	0	0	0	0	0	0	1	0	0	0	0	0	0	0	0	0	0	0	0	0	10030847	2
CTLA4	ALCOHOL	0	0	0	0	0	0	1	0	0	0	0	0	0	0	0	0	0	0	0	0	11025487	2
CTLA4	CYCLOSPORINE	0	0	0	0	0	0	0	0	0	1	0	0	0	0	0	0	0	0	0	0	18021981	2
IL6R	BAZEDOXIFENE	0	0	0	0	1	0	0	0	0	0	0	0	0	0	0	0	0	0	0	0	24456369	2
IL6R	FLUOROURACIL	0	0	0	0	0	0	1	0	0	0	0	0	0	0	0	0	0	0	0	0	8888499	2
IL6R	THALIDOMIDE	0	0	0	0	0	0	1	0	0	0	0	0	0	0	0	0	0	0	0	0	12515619	2
IL6R	RALOXIFENE	0	0	0	0	1	0	0	0	0	0	0	0	0	0	0	0	0	0	0	0	24456369	2
IL6R	SIRUKUMAB	0	1	1	0	0	0	0	0	0	0	0	0	0	0	0	0	0	0	0	0		2
GPBAR1	CHEMBL583611	0	0	0	0	1	0	0	0	0	0	0	0	0	0	0	0	0	0	0	0	25735208	2
GPBAR1	URSODIOL	0	0	0	0	1	0	0	0	0	0	0	0	0	0	0	0	0	0	0	0	25162837	2
GPBAR1	LITHOCHOLIC ACID	0	0	0	0	1	0	0	0	0	0	0	0	0	0	0	0	0	0	0	0	17963371	2
STK36	SB-202190	0	0	0	0	1	0	0	0	0	0	0	0	0	0	0	0	0	0	0	0	22951114	2
CHRNB2	POZANICLINE	1	0	1	0	0	0	0	0	0	0	0	0	0	0	0	0	0	0	0	0		2
CHRNB2	ISPRONICLINE	1	0	1	0	0	0	0	0	0	0	0	0	0	0	0	0	0	0	0	0		2
CHRNB2	TC-6499	1	0	1	0	0	0	0	0	0	0	0	0	0	0	0	0	0	0	0	0		2
CHRNB2	VARENICLINE	0	0	1	0	0	0	0	0	0	0	0	0	0	0	0	0	0	0	0	0	16883648	2
CHRNB2	CYTISINICLINE	0	1	0	0	0	0	0	0	0	0	0	0	0	0	0	0	0	0	0	0	20331614	2
PSMD1	OPROZOMIB	1	0	1	0	0	0	0	0	0	0	0	0	0	0	0	0	0	0	0	0		2
PSMD1	IXAZOMIB CITRATE	1	0	1	0	0	0	0	0	0	0	0	0	0	0	0	0	0	0	0	0		2
INPP5D	ROSIPTOR	0	1	0	0	0	0	0	0	1	0	0	0	0	0	0	0	0	0	0	0		2
INPP5D	TURNAGAINOLIDE B	0	0	0	0	1	0	0	0	0	0	0	0	0	0	0	0	0	0	0	0	21539394	2
ATG16L1	ADALIMUMAB	0	0	0	0	0	0	0	0	0	1	0	0	0	0	0	0	0	0	0	0	25712183	2
SAG	DEXAMETHASONE	0	0	0	0	0	0	1	0	0	0	0	0	0	0	0	0	0	0	0	0	3123380	2
SAG	BROMOCRIPTINE	0	0	0	0	0	0	1	0	0	0	0	0	0	0	0	0	0	0	0	0	3494043	2
SAG	INDOMETHACIN	0	0	0	0	0	0	1	0	0	0	0	0	0	0	0	0	0	0	0	0	1324133	2
SAG	CYCLOSPORINE	0	0	0	0	0	0	1	0	0	0	0	0	0	0	0	0	0	0	0	0	3123380	2
FARP2	METHYLPHENIDATE	0	0	0	0	0	0	0	0	0	1	0	0	0	0	0	0	0	0	0	0	29382897	2
DTYMK	ZIDOVUDINE	0	0	0	0	0	0	0	0	0	1	0	0	0	0	0	0	0	0	0	0	22960662	2
DTYMK	STAVUDINE	0	0	0	0	0	0	1	0	0	0	0	0	0	0	0	0	0	0	0	0	15134538	2
DTYMK	ALCOHOL	0	0	0	0	0	0	1	0	0	0	0	0	0	0	0	0	0	0	0	0	11923581	2
DTYMK	FLUOROURACIL	0	0	0	0	0	0	1	0	0	0	0	0	0	0	0	0	0	0	0	0	15067352	2
PDCD1	SPARTALIZUMAB	0	1	0	0	0	0	0	0	1	0	0	0	0	0	0	0	0	0	0	0		2
PDCD1	AMP-224	0	1	0	0	0	0	0	0	0	0	0	0	0	1	0	0	0	0	0	0		2
PDCD1	TISLELIZUMAB	0	1	0	0	0	0	0	0	1	0	0	0	0	0	0	0	0	0	0	0		2
PTPN1	INSULIN	0	0	0	0	0	0	1	0	0	0	0	0	0	0	0	0	0	0	0	0	8826975	2
PTPN1	CHEMBL2207339	0	0	0	0	1	0	0	0	0	0	0	0	0	0	0	0	0	0	0	0	23141910	2
PTPN1	CHEMBL204543	0	0	0	0	1	0	0	0	0	0	0	0	0	0	0	0	0	0	0	0	24997687	2
PTPN1	CHEMBL1162414	0	0	0	0	1	0	0	0	0	0	0	0	0	0	0	0	0	0	0	0	18595691	2
PTPN1	LIPIDYL PSEUDOPTERANE A	0	0	0	0	1	0	0	0	0	0	0	0	0	0	0	0	0	0	0	0	19061360	2
PTPN1	ALLYL ISOTHIOCYANATE	0	0	0	0	1	0	0	0	0	0	0	0	0	0	0	0	0	0	0	0	26338358	2
PTPN1	DITHIOLETHIONE	0	0	0	0	1	0	0	0	0	0	0	0	0	0	0	0	0	0	0	0	20655236	2
PTPN1	URSOLIC ACID	0	0	0	0	1	0	0	0	0	0	0	0	0	0	0	0	0	0	0	0	21453996	2
PTPN1	ISOBAVACHALCONE	0	0	0	0	1	0	0	0	0	0	0	0	0	0	0	0	0	0	0	0	24047800	2
PTPN1	GLISOFLAVONE	0	0	0	0	1	0	0	0	0	0	0	0	0	0	0	0	0	0	0	0	20724155	2
PTPN1	OLTIPRAZ	0	0	0	0	1	0	0	0	0	0	0	0	0	0	0	0	0	0	0	0	20655236	2
PTPN1	LICOAGRODIN	0	0	0	0	1	0	0	0	0	0	0	0	0	0	0	0	0	0	0	0	24047800	2
PTPN1	ALDISIN	0	0	0	0	1	0	0	0	0	0	0	0	0	0	0	0	0	0	0	0	21696953	2
PTPN1	LOBARIC ACID	0	0	0	0	1	0	0	0	0	0	0	0	0	0	0	0	0	0	0	0	19362837	2
PTPN1	FLUORESCEIN DIPHOSPHATE	0	0	0	0	1	0	0	0	0	0	0	0	0	0	0	0	0	0	0	0	21482108	2
PTPN1	MORONIC ACID	0	0	0	0	1	0	0	0	0	0	0	0	0	0	0	0	0	0	0	0	21453996	2
PTPN1	TILUDRONIC ACID	0	0	1	1	0	0	0	0	0	0	0	0	0	0	0	0	0	0	0	0		2
PTPN1	CHEMBL458855	0	0	0	0	1	0	0	0	0	0	0	0	0	0	0	0	0	0	0	0	18595691	2
PTPN1	LIPIDYL PSEUDOPTERANE D	0	0	0	0	1	0	0	0	0	0	0	0	0	0	0	0	0	0	0	0	19061360	2
PTPN1	MOROLIC ACID	0	0	0	0	1	0	0	0	0	0	0	0	0	0	0	0	0	0	0	0	21453996	2
PTPN1	LICOAGRONE	0	0	0	0	1	0	0	0	0	0	0	0	0	0	0	0	0	0	0	0	24047800	2
PTPN1	ANETHOLTRITHION	0	0	0	0	1	0	0	0	0	0	0	0	0	0	0	0	0	0	0	0	20655236	2
PTPN1	OLEANOLIC_ACID	0	0	0	0	1	0	0	0	0	0	0	0	0	0	0	0	0	0	0	0	21453996	2
NFATC2	ASPARAGINASE	0	0	0	0	0	0	0	0	0	1	0	0	0	0	0	0	0	0	0	0	25987655	2
CD84	ETANERCEPT	0	0	0	0	0	0	0	0	0	1	0	0	0	0	0	0	0	0	0	0	27564082	2
SLAMF1	METHOTREXATE	0	0	0	0	0	0	1	0	0	0	0	0	0	0	0	0	0	0	0	0	16882589	2
GNAS	FLUOROURACIL	0	0	0	0	0	1	0	0	0	0	0	0	0	0	0	0	0	0	0	0	19274060	2
GNAS	CISPLATIN	0	0	0	0	0	1	0	0	0	0	0	0	0	0	0	0	0	0	0	0	19274060	2
GNAS	DOBUTAMINE	0	0	0	0	0	0	0	0	0	1	0	0	0	0	0	0	0	0	0	0	19542315	2
SRMS	ILORASERTIB	1	0	0	0	1	0	0	0	0	0	0	0	0	0	0	0	0	0	0	0		2
SRMS	DASATINIB	1	0	0	0	1	0	0	0	0	0	0	0	0	0	0	0	0	0	0	0		2
OPRL1	CEBRANOPADOL	1	0	0	0	0	0	0	0	1	0	0	0	0	0	0	0	0	0	0	0		2
OPRL1	LY2940094	1	0	0	0	0	0	0	0	1	0	0	0	0	0	0	0	0	0	0	0		2
PTK6	SB-202190	0	0	0	0	1	0	0	0	0	0	0	0	0	0	0	0	0	0	0	0	22951114	2
CD244	ALDESLEUKIN	0	0	0	0	0	0	1	0	0	0	0	0	0	0	0	0	0	0	0	0	7561164	2
IFNAR2	PEGINTERFERON ALFA-2A	1	0	0	0	0	0	0	0	0	0	0	0	0	0	0	0	0	0	0	0		1
IFNAR2	INTERFERON ALFACON-1	1	0	0	0	0	0	0	0	0	0	0	0	0	0	0	0	0	0	0	0		1
IFNAR2	PEGINTERFERON BETA-1A	1	0	0	0	0	0	0	0	0	0	0	0	0	0	0	0	0	0	0	0		1
IFNAR2	INTERFERON BETA-1B	1	0	0	0	0	0	0	0	0	0	0	0	0	0	0	0	0	0	0	0		1
IFNAR2	ALBINTERFERON ALFA-2B	1	0	0	0	0	0	0	0	0	0	0	0	0	0	0	0	0	0	0	0		1
IFNAR2	PEGINTERFERON ALFA-2B	1	0	0	0	0	0	0	0	0	0	0	0	0	0	0	0	0	0	0	0		1
IFNAR2	INTERFERON BETA-1A	1	0	0	0	0	0	0	0	0	0	0	0	0	0	0	0	0	0	0	0		1
IFNAR2	INTERFERON ALFA-2A	1	0	0	0	0	0	0	0	0	0	0	0	0	0	0	0	0	0	0	0		1
IFNAR2	SIFALIMUMAB	0	1	0	0	0	0	0	0	0	0	0	0	0	0	0	0	0	0	0	0		1
IFNAR2	ANIFROLUMAB	0	1	0	0	0	0	0	0	0	0	0	0	0	0	0	0	0	0	0	0		1
IL10RB	PEGINTERFERON LAMBDA-1A	1	0	0	0	0	0	0	0	0	0	0	0	0	0	0	0	0	0	0	0		1
GART	PELITREXOL	0	1	0	0	0	0	0	0	0	0	0	0	0	0	0	0	0	0	0	0		1
RUNX1	PURPUROGALLIN	0	0	0	0	1	0	0	0	0	0	0	0	0	0	0	0	0	0	0	0		1
RUNX1	TOLONIUM CHLORIDE	0	0	0	0	1	0	0	0	0	0	0	0	0	0	0	0	0	0	0	0		1
RUNX1	ERGOCORNINE	0	0	0	0	1	0	0	0	0	0	0	0	0	0	0	0	0	0	0	0		1
RUNX1	APOMORPHINE HYDROCHLORIDE HEMIHYDRATE	0	0	0	0	1	0	0	0	0	0	0	0	0	0	0	0	0	0	0	0		1
RUNX1	QUINOLINIC ACID	0	0	0	0	1	0	0	0	0	0	0	0	0	0	0	0	0	0	0	0		1
RUNX1	DEPHOSTATIN	0	0	0	0	1	0	0	0	0	0	0	0	0	0	0	0	0	0	0	0		1
RUNX1	DIPYRIDYL	0	0	0	0	1	0	0	0	0	0	0	0	0	0	0	0	0	0	0	0		1
RUNX1	HOMIDIUM BROMIDE	0	0	0	0	1	0	0	0	0	0	0	0	0	0	0	0	0	0	0	0		1
RUNX1	WEDELOLACTONE	0	0	0	0	1	0	0	0	0	0	0	0	0	0	0	0	0	0	0	0		1
RUNX1	JUGLONE	0	0	0	0	1	0	0	0	0	0	0	0	0	0	0	0	0	0	0	0		1
RUNX1	IRIGENOL	0	0	0	0	1	0	0	0	0	0	0	0	0	0	0	0	0	0	0	0		1
RUNX1	TAMOXIFEN CITRATE	0	0	0	0	1	0	0	0	0	0	0	0	0	0	0	0	0	0	0	0		1
RUNX1	CHEMBL260311	0	0	0	0	1	0	0	0	0	0	0	0	0	0	0	0	0	0	0	0		1
RUNX1	DAUNORUBICIN	0	0	0	0	1	0	0	0	0	0	0	0	0	0	0	0	0	0	0	0		1
RUNX1	ELLAGIC ACID	0	0	0	0	1	0	0	0	0	0	0	0	0	0	0	0	0	0	0	0		1
RUNX1	CETIRIZINE HYDROCHLORIDE	0	0	0	0	1	0	0	0	0	0	0	0	0	0	0	0	0	0	0	0		1
RUNX1	PYROGALLOL	0	0	0	0	1	0	0	0	0	0	0	0	0	0	0	0	0	0	0	0		1
RUNX1	PHENANTHROLINE	0	0	0	0	1	0	0	0	0	0	0	0	0	0	0	0	0	0	0	0		1
RUNX1	FUMARPROTOCETRARIC ACID	0	0	0	0	1	0	0	0	0	0	0	0	0	0	0	0	0	0	0	0		1
RUNX1	CHEMBL533226	0	0	0	0	1	0	0	0	0	0	0	0	0	0	0	0	0	0	0	0		1
RUNX1	CHEMBL1341830	0	0	0	0	1	0	0	0	0	0	0	0	0	0	0	0	0	0	0	0		1
RUNX1	CHEMBL211670	0	0	0	0	1	0	0	0	0	0	0	0	0	0	0	0	0	0	0	0		1
RUNX1	CHEMBL1601846	0	0	0	0	1	0	0	0	0	0	0	0	0	0	0	0	0	0	0	0		1
RUNX1	SHIKONIN	0	0	0	0	1	0	0	0	0	0	0	0	0	0	0	0	0	0	0	0		1
RUNX1	CYTARABINE HYDROCHLORIDE	0	0	0	0	1	0	0	0	0	0	0	0	0	0	0	0	0	0	0	0		1
RUNX1	L-NOREPINEPHRINE	0	0	0	0	1	0	0	0	0	0	0	0	0	0	0	0	0	0	0	0		1
RUNX1	DISULFIRAM	0	0	0	0	1	0	0	0	0	0	0	0	0	0	0	0	0	0	0	0		1
RUNX1	ERGOCRYPTINE	0	0	0	0	1	0	0	0	0	0	0	0	0	0	0	0	0	0	0	0		1
RUNX1	FUSARIC ACID	0	0	0	0	1	0	0	0	0	0	0	0	0	0	0	0	0	0	0	0		1
RUNX1	CHEMBL313737	0	0	0	0	1	0	0	0	0	0	0	0	0	0	0	0	0	0	0	0		1
RUNX1	IRIGINOL HEXAACEATATE	0	0	0	0	1	0	0	0	0	0	0	0	0	0	0	0	0	0	0	0		1
RUNX1	AURINTRICARBOXYLIC ACID	0	0	0	0	1	0	0	0	0	0	0	0	0	0	0	0	0	0	0	0		1
SIK1	DASATINIB	0	0	0	0	0	0	0	0	1	0	0	0	0	0	0	0	0	0	0	0		1
SIK1	BOSUTINIB	0	0	0	0	0	0	0	0	1	0	0	0	0	0	0	0	0	0	0	0		1
CD247	BLINATUMOMAB	0	0	1	0	0	0	0	0	0	0	0	0	0	0	0	0	0	0	0	0		1
GPA33	HUA33	0	1	0	0	0	0	0	0	0	0	0	0	0	0	0	0	0	0	0	0		1
GPA33	MGD-007	0	1	0	0	0	0	0	0	0	0	0	0	0	0	0	0	0	0	0	0		1
IL2RB	ALDESLEUKIN	0	0	1	0	0	0	0	0	0	0	0	0	0	0	0	0	0	0	0	0		1
IL2RB	BEMPEGALDESLEUKIN	0	0	0	0	0	0	0	0	1	0	0	0	0	0	0	0	0	0	0	0		1
SSTR3	CORTISTATIN-14	0	0	0	0	0	0	0	0	1	0	0	0	0	0	0	0	0	0	0	0		1
SSTR3	PASIREOTIDE PAMOATE	1	0	0	0	0	0	0	0	0	0	0	0	0	0	0	0	0	0	0	0		1
SSTR3	LANREOTIDE	0	0	0	0	0	0	0	0	1	0	0	0	0	0	0	0	0	0	0	0		1
SSTR3	PASIREOTIDE DIASPARTATE	1	0	0	0	0	0	0	0	0	0	0	0	0	0	0	0	0	0	0	0		1
SSTR3	OCTREOTIDE ACETATE	1	0	0	0	0	0	0	0	0	0	0	0	0	0	0	0	0	0	0	0		1
SSTR3	CHEMBL442494	0	0	0	0	0	0	0	0	1	0	0	0	0	0	0	0	0	0	0	0		1
SSTR3	OCTREOTIDE	0	0	0	0	0	0	0	0	1	0	0	0	0	0	0	0	0	0	0	0		1
SSTR3	SEGLITIDE	0	0	0	0	0	0	0	0	1	0	0	0	0	0	0	0	0	0	0	0		1
PDGFB	AXITINIB	0	0	0	0	0	0	0	0	0	0	0	1	0	0	0	0	0	0	0	0		1
PDGFB	IMATINIB	0	0	0	0	0	0	0	0	0	0	0	0	1	0	0	0	0	0	0	0		1
CCR4	CHEMBL2018969	0	0	0	0	0	0	0	0	1	0	0	0	0	0	0	0	0	0	0	0		1
CCR4	GSK-2239633	0	1	0	0	0	0	0	0	0	0	0	0	0	0	0	0	0	0	0	0		1
CCR2	MK-0812	0	1	0	0	0	0	0	0	0	0	0	0	0	0	0	0	0	0	0	0		1
CCR2	PIMAGEDINE	0	1	0	0	0	0	0	0	0	0	0	0	0	0	0	0	0	0	0	0		1
CCR5	ANCRIVIROC	0	0	0	0	0	0	0	0	1	0	0	0	0	0	0	0	0	0	0	0		1
CCR5	APLAVIROC HYDROCHLORIDE	1	0	0	0	0	0	0	0	0	0	0	0	0	0	0	0	0	0	0	0		1
CCR5	CHEMBL41275	0	0	0	0	0	0	0	0	1	0	0	0	0	0	0	0	0	0	0	0		1
CCR5	VICRIVIROC MALEATE	1	0	0	0	0	0	0	0	0	0	0	0	0	0	0	0	0	0	0	0		1
CCR5	PF-04634817	1	0	0	0	0	0	0	0	0	0	0	0	0	0	0	0	0	0	0	0		1
CCR5	CHEMBL2018969	0	0	0	0	0	0	0	0	1	0	0	0	0	0	0	0	0	0	0	0		1
CCR5	APLAVIROC	0	0	0	0	0	0	0	0	1	0	0	0	0	0	0	0	0	0	0	0		1
CCR5	PF-232798	0	1	0	0	0	0	0	0	0	0	0	0	0	0	0	0	0	0	0	0		1
FASLG	ASUNERCEPT	0	0	1	0	0	0	0	0	0	0	0	0	0	0	0	0	0	0	0	0		1
RABGAP1L	ALCOHOL	0	0	0	0	0	0	0	0	0	1	0	0	0	0	0	0	0	0	0	0		1
TNFSF4	OXELUMAB	1	0	0	0	0	0	0	0	0	0	0	0	0	0	0	0	0	0	0	0		1
TNFSF4	EFIZONERIMOD ALFA	0	1	0	0	0	0	0	0	0	0	0	0	0	0	0	0	0	0	0	0		1
SENP7	CHEMBL600313	0	0	0	0	1	0	0	0	0	0	0	0	0	0	0	0	0	0	0	0		1
SENP7	DIHYDROXANTHOHUMOL	0	0	0	0	1	0	0	0	0	0	0	0	0	0	0	0	0	0	0	0		1
SENP7	CHEMBL412603	0	0	0	0	1	0	0	0	0	0	0	0	0	0	0	0	0	0	0	0		1
SENP7	CHEMBL602561	0	0	0	0	1	0	0	0	0	0	0	0	0	0	0	0	0	0	0	0		1
SENP7	IPRIFLAVONE	0	0	0	0	1	0	0	0	0	0	0	0	0	0	0	0	0	0	0	0		1
SENP7	CHEMBL428789	0	0	0	0	1	0	0	0	0	0	0	0	0	0	0	0	0	0	0	0		1
SENP7	XANTHOANGELOL B	0	0	0	0	1	0	0	0	0	0	0	0	0	0	0	0	0	0	0	0		1
SENP7	CHEMBL1504679	0	0	0	0	1	0	0	0	0	0	0	0	0	0	0	0	0	0	0	0		1
SENP7	CHEMBL1493528	0	0	0	0	1	0	0	0	0	0	0	0	0	0	0	0	0	0	0	0		1
SENP7	CHEMBL299853	0	0	0	0	1	0	0	0	0	0	0	0	0	0	0	0	0	0	0	0		1
SENP7	CHEMBL546865	0	0	0	0	1	0	0	0	0	0	0	0	0	0	0	0	0	0	0	0		1
SENP7	CHEMBL378903	0	0	0	0	1	0	0	0	0	0	0	0	0	0	0	0	0	0	0	0		1
SENP7	CHEMBL576208	0	0	0	0	1	0	0	0	0	0	0	0	0	0	0	0	0	0	0	0		1
SENP7	CHEMBL546170	0	0	0	0	1	0	0	0	0	0	0	0	0	0	0	0	0	0	0	0		1
SENP7	CHEMBL584668	0	0	0	0	1	0	0	0	0	0	0	0	0	0	0	0	0	0	0	0		1
SENP7	CHEMBL484663	0	0	0	0	1	0	0	0	0	0	0	0	0	0	0	0	0	0	0	0		1
ATP1B3	ACETYLDIGITOXIN	1	0	0	0	0	0	0	0	0	0	0	0	0	0	0	0	0	0	0	0		1
ATP1B3	DIGITOXIN	1	0	0	0	0	0	0	0	0	0	0	0	0	0	0	0	0	0	0	0		1
ATP1B3	DESLANOSIDE	1	0	0	0	0	0	0	0	0	0	0	0	0	0	0	0	0	0	0	0		1
ATP1B3	DIGOXIN	1	0	0	0	0	0	0	0	0	0	0	0	0	0	0	0	0	0	0	0		1
BCL6	ONALESPIB	0	0	0	0	0	0	0	0	0	0	0	0	0	0	1	0	0	0	0	0		1
PAK2	PF-03758309	0	0	0	0	0	0	0	0	1	0	0	0	0	0	0	0	0	0	0	0		1
PAK2	STAUROSPORINE	0	0	0	0	0	0	0	0	1	0	0	0	0	0	0	0	0	0	0	0		1
GAK	BARICITINIB	0	0	0	0	0	0	0	0	1	0	0	0	0	0	0	0	0	0	0	0		1
TXK	BOSUTINIB	0	0	0	0	0	0	0	0	1	0	0	0	0	0	0	0	0	0	0	0		1
TXK	ACALABRUTINIB	0	0	0	0	0	0	0	0	1	0	0	0	0	0	0	0	0	0	0	0		1
TXK	IBRUTINIB	0	0	0	0	0	0	0	0	1	0	0	0	0	0	0	0	0	0	0	0		1
PPP3CA	TACROLIMUS	0	1	0	0	0	0	0	0	0	0	0	0	0	0	0	0	0	0	0	0		1
PPP3CA	CYCLOSPORINE	0	1	0	0	0	0	0	0	0	0	0	0	0	0	0	0	0	0	0	0		1
PPP3CA	PIMECROLIMUS	0	1	0	0	0	0	0	0	0	0	0	0	0	0	0	0	0	0	0	0		1
NFKB1	CHEMBL51697	0	0	0	0	1	0	0	0	0	0	0	0	0	0	0	0	0	0	0	0		1
NFKB1	INDOPROFEN	0	0	0	0	1	0	0	0	0	0	0	0	0	0	0	0	0	0	0	0		1
NFKB1	4',7-DIMETHOXY-5-HYDROXYGENISTEIN	0	0	0	0	1	0	0	0	0	0	0	0	0	0	0	0	0	0	0	0		1
NFKB1	CHEMBL275311	0	0	0	0	1	0	0	0	0	0	0	0	0	0	0	0	0	0	0	0		1
NFKB1	CHEMBL1405979	0	0	0	0	1	0	0	0	0	0	0	0	0	0	0	0	0	0	0	0		1
NFKB1	CHEMBL63329	0	0	0	0	1	0	0	0	0	0	0	0	0	0	0	0	0	0	0	0		1
NFKB1	CHEMBL428789	0	0	0	0	1	0	0	0	0	0	0	0	0	0	0	0	0	0	0	0		1
NFKB1	PROTRIPTYLINE	0	0	0	0	1	0	0	0	0	0	0	0	0	0	0	0	0	0	0	0		1
NFKB1	CHEMBL201325	0	0	0	0	1	0	0	0	0	0	0	0	0	0	0	0	0	0	0	0		1
NFKB1	TYRPHOSTIN 47	0	0	0	0	1	0	0	0	0	0	0	0	0	0	0	0	0	0	0	0		1
NFKB1	CHEMBL85826	0	0	0	0	1	0	0	0	0	0	0	0	0	0	0	0	0	0	0	0		1
NFKB1	(+)-EPITAXIFOLIN	0	0	0	0	1	0	0	0	0	0	0	0	0	0	0	0	0	0	0	0		1
NFKB1	3R14S-OCHRATOXIN A	0	0	0	0	1	0	0	0	0	0	0	0	0	0	0	0	0	0	0	0		1
NFKB1	MITOXANTRONE	0	0	0	0	1	0	0	0	0	0	0	0	0	0	0	0	0	0	0	0		1
NFKB1	CHLORAMBUCIL	0	0	0	0	1	0	0	0	0	0	0	0	0	0	0	0	0	0	0	0		1
NFKB1	FURAFYLLINE	0	0	0	0	1	0	0	0	0	0	0	0	0	0	0	0	0	0	0	0		1
NFKB1	BORTEZOMIB	0	0	0	0	0	0	0	0	0	0	0	0	0	0	0	1	0	0	0	0		1
NFKB1	TYRPHOSTIN 23	0	0	0	0	1	0	0	0	0	0	0	0	0	0	0	0	0	0	0	0		1
NFKB1	TETRABROMOBENZOTRIAZOLE	0	0	0	0	1	0	0	0	0	0	0	0	0	0	0	0	0	0	0	0		1
NFKB1	LAPACHONE	0	0	0	0	1	0	0	0	0	0	0	0	0	0	0	0	0	0	0	0		1
NFKB1	SANGUINARIUM	0	0	0	0	1	0	0	0	0	0	0	0	0	0	0	0	0	0	0	0		1
NFKB1	6,4'-DIMETHOXYFLAVONE	0	0	0	0	1	0	0	0	0	0	0	0	0	0	0	0	0	0	0	0		1
NFKB1	SULFAPHENAZOLE	0	0	0	0	1	0	0	0	0	0	0	0	0	0	0	0	0	0	0	0		1
NFKB1	NORDIHYDROGUAIARETIC ACID	0	0	0	0	1	0	0	0	0	0	0	0	0	0	0	0	0	0	0	0		1
NFKB1	TRIAMCINOLONE	0	0	0	0	1	0	0	0	0	0	0	0	0	0	0	0	0	0	0	0		1
NFKB1	PHENAMIL METHANESULFONATE	0	0	0	0	1	0	0	0	0	0	0	0	0	0	0	0	0	0	0	0		1
NFKB1	CHELIDAMIC ACID	0	0	0	0	1	0	0	0	0	0	0	0	0	0	0	0	0	0	0	0		1
NFKB1	CHEMBL605003	0	0	0	0	1	0	0	0	0	0	0	0	0	0	0	0	0	0	0	0		1
NFKB1	RITANSERIN	0	0	0	0	1	0	0	0	0	0	0	0	0	0	0	0	0	0	0	0		1
NFKB1	CHELERYTHRINE	0	0	0	0	1	0	0	0	0	0	0	0	0	0	0	0	0	0	0	0		1
NFKB1	CHEMBL34730	0	0	0	0	1	0	0	0	0	0	0	0	0	0	0	0	0	0	0	0		1
NFKB1	CHEMBL602718	0	0	0	0	1	0	0	0	0	0	0	0	0	0	0	0	0	0	0	0		1
NFKB1	DIHYDREXIDINE	0	0	0	0	1	0	0	0	0	0	0	0	0	0	0	0	0	0	0	0		1
NFKB1	TRYPTAMINE	0	0	0	0	1	0	0	0	0	0	0	0	0	0	0	0	0	0	0	0		1
NFKB1	HYDROQUINONE	0	0	0	0	1	0	0	0	0	0	0	0	0	0	0	0	0	0	0	0		1
NFKB1	TYRPHOSTIN AG-1478	0	0	0	0	1	0	0	0	0	0	0	0	0	0	0	0	0	0	0	0		1
NFKB1	BENZO(K)FLUORANTHENE	0	0	0	0	1	0	0	0	0	0	0	0	0	0	0	0	0	0	0	0		1
NFKB1	CHEMBL408850	0	0	0	0	1	0	0	0	0	0	0	0	0	0	0	0	0	0	0	0		1
NFKB1	CHEMBL502774	0	0	0	0	1	0	0	0	0	0	0	0	0	0	0	0	0	0	0	0		1
NFKB1	FRENTIZOLE	0	0	0	0	1	0	0	0	0	0	0	0	0	0	0	0	0	0	0	0		1
NFKB1	(S)-MEXILETINE	0	0	0	0	1	0	0	0	0	0	0	0	0	0	0	0	0	0	0	0		1
NFKB1	DYRENE	0	0	0	0	1	0	0	0	0	0	0	0	0	0	0	0	0	0	0	0		1
NFKB1	FENRETINIDE	0	0	0	0	1	0	0	0	0	0	0	0	0	0	0	0	0	0	0	0		1
NFKB1	GW7647	0	0	0	0	1	0	0	0	0	0	0	0	0	0	0	0	0	0	0	0		1
NFKB1	CHEMBL72365	0	0	0	0	1	0	0	0	0	0	0	0	0	0	0	0	0	0	0	0		1
NFKB1	LY-294002	0	0	0	0	1	0	0	0	0	0	0	0	0	0	0	0	0	0	0	0		1
NFKB1	(R)-NITRENDIPINE	0	0	0	0	1	0	0	0	0	0	0	0	0	0	0	0	0	0	0	0		1
NFKB1	(R,S)-INDATRALINE	0	0	0	0	1	0	0	0	0	0	0	0	0	0	0	0	0	0	0	0		1
NFKB1	CHLORPROPAMIDE	0	0	0	0	1	0	0	0	0	0	0	0	0	0	0	0	0	0	0	0		1
NFKB1	NIFEDIPINE	0	0	0	0	1	0	0	0	0	0	0	0	0	0	0	0	0	0	0	0		1
NFKB1	PECTOLINARIGENIN	0	0	0	0	1	0	0	0	0	0	0	0	0	0	0	0	0	0	0	0		1
NFKB1	CHEMBL2094789	0	0	0	0	1	0	0	0	0	0	0	0	0	0	0	0	0	0	0	0		1
NFKB1	CHEMBL578741	0	0	0	0	1	0	0	0	0	0	0	0	0	0	0	0	0	0	0	0		1
NFKB1	PROMETHAZINE HYDROCHLORIDE	0	0	0	0	1	0	0	0	0	0	0	0	0	0	0	0	0	0	0	0		1
NFKB1	CHEMBL260560	0	0	0	0	1	0	0	0	0	0	0	0	0	0	0	0	0	0	0	0		1
NFKB1	EPIGALOCATECHIN GALLATE	0	0	0	0	1	0	0	0	0	0	0	0	0	0	0	0	0	0	0	0		1
NFKB1	BACLOFEN	0	0	0	0	1	0	0	0	0	0	0	0	0	0	0	0	0	0	0	0		1
NFKB1	BENZETHONIUM CHLORIDE	0	0	0	0	1	0	0	0	0	0	0	0	0	0	0	0	0	0	0	0		1
NFKB1	DISULFIRAM	0	0	0	0	1	0	0	0	0	0	0	0	0	0	0	0	0	0	0	0		1
NFKB1	TYRPHOSTIN 1	0	0	0	0	1	0	0	0	0	0	0	0	0	0	0	0	0	0	0	0		1
NFKB1	CHEMBL406557	0	0	0	0	1	0	0	0	0	0	0	0	0	0	0	0	0	0	0	0		1
NFKB1	BARDOXOLONE	0	0	1	0	0	0	0	0	0	0	0	0	0	0	0	0	0	0	0	0		1
NFKB1	CHEMBL466465	0	0	0	0	1	0	0	0	0	0	0	0	0	0	0	0	0	0	0	0		1
NFKB1	CHEMBL84010	0	0	0	0	1	0	0	0	0	0	0	0	0	0	0	0	0	0	0	0		1
NFKB1	CHEMBL595227	0	0	0	0	1	0	0	0	0	0	0	0	0	0	0	0	0	0	0	0		1
NFKB1	RESVERATROL	0	0	0	0	1	0	0	0	0	0	0	0	0	0	0	0	0	0	0	0		1
NFKB1	HYDROCORTISONE	0	0	0	0	1	0	0	0	0	0	0	0	0	0	0	0	0	0	0	0		1
NFKB1	CHEMBL528694	0	0	0	0	1	0	0	0	0	0	0	0	0	0	0	0	0	0	0	0		1
NFKB1	SB-222200	0	0	0	0	1	0	0	0	0	0	0	0	0	0	0	0	0	0	0	0		1
NFKB1	DAPH	0	0	0	0	1	0	0	0	0	0	0	0	0	0	0	0	0	0	0	0		1
IL2	ALDESLEUKIN	0	1	0	0	0	0	0	0	0	0	0	0	0	0	0	0	0	0	0	0		1
IL2	THYMOCTONAN	0	1	0	0	0	0	0	0	0	0	0	0	0	0	0	0	0	0	0	0		1
IL2	DACLIZUMAB	0	1	0	0	0	0	0	0	0	0	0	0	0	0	0	0	0	0	0	0		1
TRPC3	CLEMIZOLE	0	0	0	0	0	0	0	0	1	0	0	0	0	0	0	0	0	0	0	0		1
TRPC3	NORGESTIMATE	0	0	0	0	0	0	0	0	1	0	0	0	0	0	0	0	0	0	0	0		1
PRLR	ENDOSTATIN	0	1	0	0	0	0	0	0	0	0	0	0	0	0	0	0	0	0	0	0		1
PRLR	SOMATROPIN	0	0	1	0	0	0	0	0	0	0	0	0	0	0	0	0	0	0	0	0		1
PTGER4	CR-6086	0	0	0	0	0	0	0	0	1	0	0	0	0	0	0	0	0	0	0	0		1
PTGER4	CICAPROST	0	0	0	0	0	0	0	0	1	0	0	0	0	0	0	0	0	0	0	0		1
PTGER4	BERAPROST	0	0	0	0	0	0	0	0	1	0	0	0	0	0	0	0	0	0	0	0		1
PTGER4	ILOPROST	0	0	0	0	0	0	0	0	1	0	0	0	0	0	0	0	0	0	0	0		1
PTGER4	ENPROSTIL	0	0	0	0	0	0	0	0	1	0	0	0	0	0	0	0	0	0	0	0		1
PTGER4	EVATANEPAG	0	0	0	0	0	0	0	0	1	0	0	0	0	0	0	0	0	0	0	0		1
PTGER4	ALPROSTADIL	0	0	0	0	0	0	0	0	1	0	0	0	0	0	0	0	0	0	0	0		1
PTGER4	CARBACYCLIN	0	0	0	0	0	0	0	0	1	0	0	0	0	0	0	0	0	0	0	0		1
PTGER4	CHEMBL597997	0	0	0	0	0	0	0	0	1	0	0	0	0	0	0	0	0	0	0	0		1
PTGER4	TREPROSTINIL	0	0	0	0	0	0	0	0	1	0	0	0	0	0	0	0	0	0	0	0		1
PTGER4	EPOPROSTENOL	0	0	0	0	0	0	0	0	1	0	0	0	0	0	0	0	0	0	0	0		1
PTGER4	BUTAPROST	0	1	0	0	0	0	0	0	0	0	0	0	0	0	0	0	0	0	0	0		1
IL6ST	SATRALIZUMAB	1	0	0	0	0	0	0	0	0	0	0	0	0	0	0	0	0	0	0	0		1
PTPRC	APAMISTAMAB IODINE I-131	0	1	0	0	0	0	0	0	0	0	0	0	0	0	0	0	0	0	0	0		1
ERAP1	TOSEDOSTAT	1	0	0	0	0	0	0	0	0	0	0	0	0	0	0	0	0	0	0	0		1
ERAP1	CHEMBL531269	0	0	0	0	1	0	0	0	0	0	0	0	0	0	0	0	0	0	0	0		1
ERAP1	UMBELLIFERONE	0	0	0	0	1	0	0	0	0	0	0	0	0	0	0	0	0	0	0	0		1
ERAP1	ESCULETIN	0	0	0	0	1	0	0	0	0	0	0	0	0	0	0	0	0	0	0	0		1
ERAP1	CHEMBL587247	0	0	0	0	1	0	0	0	0	0	0	0	0	0	0	0	0	0	0	0		1
ERAP1	SCOPOLETIN	0	0	0	0	1	0	0	0	0	0	0	0	0	0	0	0	0	0	0	0		1
LNPEP	TOSEDOSTAT	1	0	0	0	0	0	0	0	0	0	0	0	0	0	0	0	0	0	0	0		1
ERAP2	TOSEDOSTAT	1	0	0	0	0	0	0	0	0	0	0	0	0	0	0	0	0	0	0	0		1
ERAP2	ESCULETIN	0	0	0	0	1	0	0	0	0	0	0	0	0	0	0	0	0	0	0	0		1
ERAP2	SCOPOLETIN	0	0	0	0	1	0	0	0	0	0	0	0	0	0	0	0	0	0	0	0		1
FGF1	MUPARFOSTAT	1	0	0	0	0	0	0	0	0	0	0	0	0	0	0	0	0	0	0	0		1
F12	PENTAMIDINE ISETHIONATE	0	0	0	0	1	0	0	0	0	0	0	0	0	0	0	0	0	0	0	0		1
GRK6	BALANOL	0	0	0	0	0	0	0	0	1	0	0	0	0	0	0	0	0	0	0	0		1
NQO2	CARICOTAMIDE	0	0	1	0	0	0	0	0	0	0	0	0	0	0	0	0	0	0	0	0		1
NQO2	C-1311	0	1	0	0	0	0	0	0	0	0	0	0	0	0	0	0	0	0	0	0		1
RIPK1	NECROSTATIN	0	0	0	0	0	0	0	0	1	0	0	0	0	0	0	0	0	0	0	0		1
RIPK1	PONATINIB	0	0	0	0	0	0	0	0	1	0	0	0	0	0	0	0	0	0	0	0		1
MAPKAPK2	AT-13148	1	0	0	0	0	0	0	0	0	0	0	0	0	0	0	0	0	0	0	0		1
MAPKAPK2	CBP-501	0	1	0	0	0	0	0	0	0	0	0	0	0	0	0	0	0	0	0	0		1
MAPKAPK2	LAUROGUADINE	0	0	0	0	1	0	0	0	0	0	0	0	0	0	0	0	0	0	0	0		1
MAPKAPK2	CHEMBL225519	0	0	0	0	1	0	0	0	0	0	0	0	0	0	0	0	0	0	0	0		1
IL10	SCH-708980	1	0	0	0	0	0	0	0	0	0	0	0	0	0	0	0	0	0	0	0		1
IL10	PEGILODECAKIN	0	1	0	0	0	0	0	0	0	0	0	0	0	0	0	0	0	0	0	0		1
IL10	ILODECAKIN	0	1	0	0	0	0	0	0	0	0	0	0	0	0	0	0	0	0	0	0		1
POU5F1	CARBAMAZEPINE	0	0	0	0	0	0	0	0	0	1	0	0	0	0	0	0	0	0	0	0		1
POU5F1	PHENYTOIN	0	0	0	0	0	0	0	0	0	1	0	0	0	0	0	0	0	0	0	0		1
PSORS1C1	ETANERCEPT	0	0	0	0	0	0	0	0	0	1	0	0	0	0	0	0	0	0	0	0		1
LST1	ABACAVIR	0	0	0	0	0	0	0	0	0	1	0	0	0	0	0	0	0	0	0	0		1
LTA	PATECLIZUMAB	1	0	0	0	0	0	0	0	0	0	0	0	0	0	0	0	0	0	0	0		1
LTA	ABACAVIR	0	0	0	0	0	0	0	0	0	1	0	0	0	0	0	0	0	0	0	0		1
LTB	ABACAVIR	0	0	0	0	0	0	0	0	0	1	0	0	0	0	0	0	0	0	0	0		1
MICB	RIBAVIRIN	0	0	0	0	0	0	0	0	0	1	0	0	0	0	0	0	0	0	0	0		1
TNF	ONERCEPT	1	0	0	0	0	0	0	0	0	0	0	0	0	0	0	0	0	0	0	0		1
TNF	AZ9773	1	0	0	0	0	0	0	0	0	0	0	0	0	0	0	0	0	0	0	0		1
TNF	VADIMEZAN	0	0	0	0	0	0	0	0	0	0	0	0	0	0	0	0	1	0	0	0		1
TNF	CERTOLIZUMAB PEGOL	1	0	0	0	0	0	0	0	0	0	0	0	0	0	0	0	0	0	0	0		1
TNF	NERELIMOMAB	1	0	0	0	0	0	0	0	0	0	0	0	0	0	0	0	0	0	0	0		1
TNF	LENERCEPT	1	0	0	0	0	0	0	0	0	0	0	0	0	0	0	0	0	0	0	0		1
TNF	PF-04236921	0	0	1	0	0	0	0	0	0	0	0	0	0	0	0	0	0	0	0	0		1
TNF	NAFAMOSTAT	0	1	0	0	0	0	0	0	0	0	0	0	0	0	0	0	0	0	0	0		1
TNF	AMPHOTERICIN B	0	0	0	0	1	0	0	0	0	0	0	0	0	0	0	0	0	0	0	0		1
TNF	CELASTROL	0	1	0	0	0	0	0	0	0	0	0	0	0	0	0	0	0	0	0	0		1
TNF	DERSALAZINE	0	0	1	0	0	0	0	0	0	0	0	0	0	0	0	0	0	0	0	0		1
TNF	CERTOLIZUMAB	0	1	0	0	0	0	0	0	0	0	0	0	0	0	0	0	0	0	0	0		1
TNF	BENZO[E]PYRENE	0	0	0	0	1	0	0	0	0	0	0	0	0	0	0	0	0	0	0	0		1
TNF	METHYLENE BLUE	0	0	0	0	1	0	0	0	0	0	0	0	0	0	0	0	0	0	0	0		1
TNF	HOMIDIUM BROMIDE	0	0	0	0	1	0	0	0	0	0	0	0	0	0	0	0	0	0	0	0		1
TNF	ORTATAXEL	0	1	0	0	0	0	0	0	0	0	0	0	0	0	0	0	0	0	0	0		1
TNF	REMTOLUMAB	0	1	0	0	0	0	0	0	0	0	0	0	0	0	0	0	0	0	0	0		1
TNF	ABBV-257	0	1	0	0	0	0	0	0	0	0	0	0	0	0	0	0	0	0	0	0		1
TNF	ENBREL	0	1	0	0	0	0	0	0	0	0	0	0	0	0	0	0	0	0	0	0		1
TNF	LENABASUM	0	1	0	0	0	0	0	0	0	0	0	0	0	0	0	0	0	0	0	0		1
TNF	DIGOXIN	0	0	0	0	1	0	0	0	0	0	0	0	0	0	0	0	0	0	0	0		1
TNF	PENTOXIFYLLINE	0	1	0	0	0	0	0	0	0	0	0	0	0	0	0	0	0	0	0	0		1
TNF	5,7-DIHYDROXY-4-METHYLCOUMARIN	0	0	0	0	1	0	0	0	0	0	0	0	0	0	0	0	0	0	0	0		1
EHMT2	CHEMBL569864	0	0	0	0	0	0	0	0	1	0	0	0	0	0	0	0	0	0	0	0		1
EHMT2	CLIOQUINOL	0	0	0	0	1	0	0	0	0	0	0	0	0	0	0	0	0	0	0	0		1
EHMT2	CHEMBL520992	0	0	0	0	1	0	0	0	0	0	0	0	0	0	0	0	0	0	0	0		1
EHMT2	MORIN	0	0	0	0	1	0	0	0	0	0	0	0	0	0	0	0	0	0	0	0		1
EHMT2	ACTINONIN	0	0	0	0	1	0	0	0	0	0	0	0	0	0	0	0	0	0	0	0		1
EHMT2	CHLORPROMAZINE HYDROCHLORIDE	0	0	0	0	1	0	0	0	0	0	0	0	0	0	0	0	0	0	0	0		1
EHMT2	CHEMBL527585	0	0	0	0	1	0	0	0	0	0	0	0	0	0	0	0	0	0	0	0		1
EHMT2	CHEMBL588038	0	0	0	0	1	0	0	0	0	0	0	0	0	0	0	0	0	0	0	0		1
EHMT2	CHEMBL579742	0	0	0	0	1	0	0	0	0	0	0	0	0	0	0	0	0	0	0	0		1
EHMT2	PROPYLENE GLYCOL MONOSTEARATE	0	0	0	0	1	0	0	0	0	0	0	0	0	0	0	0	0	0	0	0		1
EHMT2	LOVASTATIN	0	0	0	0	1	0	0	0	0	0	0	0	0	0	0	0	0	0	0	0		1
EHMT2	DIMETHYLPHENYLPIPERAZINIUM	0	0	0	0	1	0	0	0	0	0	0	0	0	0	0	0	0	0	0	0		1
EHMT2	VITAMIN B2	0	0	0	0	1	0	0	0	0	0	0	0	0	0	0	0	0	0	0	0		1
EHMT2	NOMIFENSINE	0	0	0	0	1	0	0	0	0	0	0	0	0	0	0	0	0	0	0	0		1
EHMT2	MYRICETIN	0	0	0	0	1	0	0	0	0	0	0	0	0	0	0	0	0	0	0	0		1
EHMT2	ESTRADIOL	0	0	0	0	1	0	0	0	0	0	0	0	0	0	0	0	0	0	0	0		1
EHMT2	PROPRANOLOL	0	0	0	0	1	0	0	0	0	0	0	0	0	0	0	0	0	0	0	0		1
EHMT2	AURINTRICARBOXYLIC ACID	0	0	0	0	1	0	0	0	0	0	0	0	0	0	0	0	0	0	0	0		1
EHMT2	TYRPHOSTIN 23	0	0	0	0	1	0	0	0	0	0	0	0	0	0	0	0	0	0	0	0		1
EHMT2	CHEMBL1256484	0	0	0	0	1	0	0	0	0	0	0	0	0	0	0	0	0	0	0	0		1
EHMT2	CHEMBL527336	0	0	0	0	1	0	0	0	0	0	0	0	0	0	0	0	0	0	0	0		1
EHMT2	GAMMA-AMINOBUTYRIC ACID	0	0	0	0	1	0	0	0	0	0	0	0	0	0	0	0	0	0	0	0		1
EHMT2	BIS(DIMETHYLAMINETHIOCARBONYL)MONOSULFIDE	0	0	0	0	1	0	0	0	0	0	0	0	0	0	0	0	0	0	0	0		1
EHMT2	CHEMBL175266	0	0	0	0	1	0	0	0	0	0	0	0	0	0	0	0	0	0	0	0		1
EHMT2	ZAPA	0	0	0	0	1	0	0	0	0	0	0	0	0	0	0	0	0	0	0	0		1
EHMT2	DAPHNETIN	0	0	0	0	1	0	0	0	0	0	0	0	0	0	0	0	0	0	0	0		1
EHMT2	CHEMBL603024	0	0	0	0	1	0	0	0	0	0	0	0	0	0	0	0	0	0	0	0		1
EHMT2	CHLOROXINE	0	0	0	0	1	0	0	0	0	0	0	0	0	0	0	0	0	0	0	0		1
EHMT2	DOCONEXENT	0	0	0	0	1	0	0	0	0	0	0	0	0	0	0	0	0	0	0	0		1
EHMT2	CHEMBL1408276	0	0	0	0	1	0	0	0	0	0	0	0	0	0	0	0	0	0	0	0		1
EHMT2	CHEMBL578896	0	0	0	0	1	0	0	0	0	0	0	0	0	0	0	0	0	0	0	0		1
EHMT2	CHEMBL525888	0	0	0	0	1	0	0	0	0	0	0	0	0	0	0	0	0	0	0	0		1
EHMT2	DOCEBENONE	0	0	0	0	1	0	0	0	0	0	0	0	0	0	0	0	0	0	0	0		1
EHMT2	CHEMBL338314	0	0	0	0	1	0	0	0	0	0	0	0	0	0	0	0	0	0	0	0		1
EHMT2	CHEMBL591864	0	0	0	0	1	0	0	0	0	0	0	0	0	0	0	0	0	0	0	0		1
EHMT2	CHEMBL577851	0	0	0	0	1	0	0	0	0	0	0	0	0	0	0	0	0	0	0	0		1
EHMT2	THIOGUANINE	0	0	0	0	1	0	0	0	0	0	0	0	0	0	0	0	0	0	0	0		1
EHMT2	(D)-SERINE	0	0	0	0	1	0	0	0	0	0	0	0	0	0	0	0	0	0	0	0		1
EHMT2	IBUFENAC	0	0	0	0	1	0	0	0	0	0	0	0	0	0	0	0	0	0	0	0		1
EHMT2	CHEMBL589734	0	0	0	0	1	0	0	0	0	0	0	0	0	0	0	0	0	0	0	0		1
EHMT2	PURPUROGALLIN	0	0	0	0	1	0	0	0	0	0	0	0	0	0	0	0	0	0	0	0		1
EHMT2	CHEMBL56393	0	0	0	0	1	0	0	0	0	0	0	0	0	0	0	0	0	0	0	0		1
EHMT2	INAMRINONE	0	0	0	0	1	0	0	0	0	0	0	0	0	0	0	0	0	0	0	0		1
EHMT2	DOXYCYCLINE	0	0	0	0	1	0	0	0	0	0	0	0	0	0	0	0	0	0	0	0		1
EHMT2	DIAMIDE	0	0	0	0	1	0	0	0	0	0	0	0	0	0	0	0	0	0	0	0		1
EHMT2	CHEMBL522983	0	0	0	0	1	0	0	0	0	0	0	0	0	0	0	0	0	0	0	0		1
EHMT2	AGROCLAVINE	0	0	0	0	1	0	0	0	0	0	0	0	0	0	0	0	0	0	0	0		1
EHMT2	QUINACRINE	0	0	0	0	1	0	0	0	0	0	0	0	0	0	0	0	0	0	0	0		1
EHMT2	KETANSERIN	0	0	0	0	1	0	0	0	0	0	0	0	0	0	0	0	0	0	0	0		1
EHMT2	CHEMBL1576310	0	0	0	0	1	0	0	0	0	0	0	0	0	0	0	0	0	0	0	0		1
EHMT2	METHYLSELENOCYSTEINE	0	0	0	0	1	0	0	0	0	0	0	0	0	0	0	0	0	0	0	0		1
EHMT2	PIRENZEPINE HYDROCHLORIDE	0	0	0	0	1	0	0	0	0	0	0	0	0	0	0	0	0	0	0	0		1
EHMT2	BOPINDOLOL	0	0	0	0	1	0	0	0	0	0	0	0	0	0	0	0	0	0	0	0		1
EHMT2	DEFERIPRONE	0	0	0	0	1	0	0	0	0	0	0	0	0	0	0	0	0	0	0	0		1
EHMT2	CHEMBL590949	0	0	0	0	1	0	0	0	0	0	0	0	0	0	0	0	0	0	0	0		1
EHMT2	CHEMBL534214	0	0	0	0	1	0	0	0	0	0	0	0	0	0	0	0	0	0	0	0		1
EHMT2	CHEMBL523200	0	0	0	0	1	0	0	0	0	0	0	0	0	0	0	0	0	0	0	0		1
EHMT2	ALITRETINOIN	0	0	0	0	1	0	0	0	0	0	0	0	0	0	0	0	0	0	0	0		1
EHMT2	METHYLDOPA	0	0	0	0	1	0	0	0	0	0	0	0	0	0	0	0	0	0	0	0		1
EHMT2	CHEMBL547656	0	0	0	0	1	0	0	0	0	0	0	0	0	0	0	0	0	0	0	0		1
EHMT2	QUINELORANE	0	0	0	0	1	0	0	0	0	0	0	0	0	0	0	0	0	0	0	0		1
EHMT2	N-METHYLHISTAMINE	0	0	0	0	1	0	0	0	0	0	0	0	0	0	0	0	0	0	0	0		1
EHMT2	CAPENSIN	0	0	0	0	1	0	0	0	0	0	0	0	0	0	0	0	0	0	0	0		1
EHMT2	U-0126	0	0	0	0	1	0	0	0	0	0	0	0	0	0	0	0	0	0	0	0		1
EHMT2	DIETHYLCARBAMAZINE CITRATE	0	0	0	0	1	0	0	0	0	0	0	0	0	0	0	0	0	0	0	0		1
EHMT2	CHEMBL1232076	0	0	0	0	1	0	0	0	0	0	0	0	0	0	0	0	0	0	0	0		1
EHMT2	ACID BLUE 129	0	0	0	0	1	0	0	0	0	0	0	0	0	0	0	0	0	0	0	0		1
EHMT2	PAPAVERINE	0	0	0	0	1	0	0	0	0	0	0	0	0	0	0	0	0	0	0	0		1
EHMT2	GALLAMINE	0	0	0	0	1	0	0	0	0	0	0	0	0	0	0	0	0	0	0	0		1
EHMT2	PROCHLORPERAZINE	0	0	0	0	1	0	0	0	0	0	0	0	0	0	0	0	0	0	0	0		1
EHMT2	CHEMBL597246	0	0	0	0	1	0	0	0	0	0	0	0	0	0	0	0	0	0	0	0		1
EHMT2	CHEMBL534288	0	0	0	0	1	0	0	0	0	0	0	0	0	0	0	0	0	0	0	0		1
EHMT2	CHEMBL600692	0	0	0	0	1	0	0	0	0	0	0	0	0	0	0	0	0	0	0	0		1
EHMT2	(4-CHLOROPHENYL)(MORPHOLINO)METHANETHIONE	0	0	0	0	1	0	0	0	0	0	0	0	0	0	0	0	0	0	0	0		1
EHMT2	CHEMBL592124	0	0	0	0	1	0	0	0	0	0	0	0	0	0	0	0	0	0	0	0		1
EHMT2	CHEMBL1256776	0	0	0	0	1	0	0	0	0	0	0	0	0	0	0	0	0	0	0	0		1
EHMT2	ELLAGIC ACID	0	0	0	0	1	0	0	0	0	0	0	0	0	0	0	0	0	0	0	0		1
EHMT2	RESERPINE	0	0	0	0	1	0	0	0	0	0	0	0	0	0	0	0	0	0	0	0		1
EHMT2	CHEMBL1270169	0	0	0	0	1	0	0	0	0	0	0	0	0	0	0	0	0	0	0	0		1
EHMT2	CYSTEAMINE	0	0	0	0	1	0	0	0	0	0	0	0	0	0	0	0	0	0	0	0		1
EHMT2	DEMECLOCYCLINE HYDROCHLORIDE	0	0	0	0	1	0	0	0	0	0	0	0	0	0	0	0	0	0	0	0		1
EHMT2	CHEMBL600734	0	0	0	0	1	0	0	0	0	0	0	0	0	0	0	0	0	0	0	0		1
EHMT2	CAFFEIC ACID	0	0	0	0	1	0	0	0	0	0	0	0	0	0	0	0	0	0	0	0		1
EHMT2	ANTHRALIN	0	0	0	0	1	0	0	0	0	0	0	0	0	0	0	0	0	0	0	0		1
EHMT2	CHEMBL529741	0	0	0	0	1	0	0	0	0	0	0	0	0	0	0	0	0	0	0	0		1
EHMT2	DIACEREIN	0	0	0	0	1	0	0	0	0	0	0	0	0	0	0	0	0	0	0	0		1
EHMT2	ERGOCRYPTINE	0	0	0	0	1	0	0	0	0	0	0	0	0	0	0	0	0	0	0	0		1
EHMT2	PORFIROMYCIN	0	0	0	0	1	0	0	0	0	0	0	0	0	0	0	0	0	0	0	0		1
EHMT2	ARACHIDONOYL DOPAMINE	0	0	0	0	1	0	0	0	0	0	0	0	0	0	0	0	0	0	0	0		1
EHMT2	PALMITOYL-CARNITINE	0	0	0	0	1	0	0	0	0	0	0	0	0	0	0	0	0	0	0	0		1
EHMT2	YOHIMBINE	0	0	0	0	1	0	0	0	0	0	0	0	0	0	0	0	0	0	0	0		1
EHMT2	SPERMIDINE	0	0	0	0	1	0	0	0	0	0	0	0	0	0	0	0	0	0	0	0		1
EHMT2	CHOLECALCIFEROL	0	0	0	0	1	0	0	0	0	0	0	0	0	0	0	0	0	0	0	0		1
EHMT2	DEQUALINIUM CHLORIDE	0	0	0	0	1	0	0	0	0	0	0	0	0	0	0	0	0	0	0	0		1
EHMT2	FLUSPIRILENE	0	0	0	0	1	0	0	0	0	0	0	0	0	0	0	0	0	0	0	0		1
EHMT2	SB-202190	0	0	0	0	1	0	0	0	0	0	0	0	0	0	0	0	0	0	0	0		1
EHMT2	QUINPIROLE	0	0	0	0	1	0	0	0	0	0	0	0	0	0	0	0	0	0	0	0		1
EHMT2	SHIKONIN	0	0	0	0	1	0	0	0	0	0	0	0	0	0	0	0	0	0	0	0		1
EHMT2	CHEMBL444928	0	0	0	0	1	0	0	0	0	0	0	0	0	0	0	0	0	0	0	0		1
EHMT2	HELENALIN	0	0	0	0	1	0	0	0	0	0	0	0	0	0	0	0	0	0	0	0		1
EHMT2	BISMUTH SUBSALICYLATE	0	0	0	0	1	0	0	0	0	0	0	0	0	0	0	0	0	0	0	0		1
EHMT2	DAMNACANTHAL	0	0	0	0	1	0	0	0	0	0	0	0	0	0	0	0	0	0	0	0		1
EHMT2	NICLOSAMIDE	0	0	0	0	1	0	0	0	0	0	0	0	0	0	0	0	0	0	0	0		1
EHMT2	CHEMBL275177	0	0	0	0	1	0	0	0	0	0	0	0	0	0	0	0	0	0	0	0		1
EHMT2	CHEMBL1546228	0	0	0	0	1	0	0	0	0	0	0	0	0	0	0	0	0	0	0	0		1
EHMT2	FLUPIRTINE	0	0	0	0	1	0	0	0	0	0	0	0	0	0	0	0	0	0	0	0		1
EHMT2	QUISQUALATE	0	0	0	0	1	0	0	0	0	0	0	0	0	0	0	0	0	0	0	0		1
EHMT2	CGP-71683A	0	0	0	0	1	0	0	0	0	0	0	0	0	0	0	0	0	0	0	0		1
EHMT2	DEPHOSTATIN	0	0	0	0	1	0	0	0	0	0	0	0	0	0	0	0	0	0	0	0		1
EHMT2	FENOLDOPAM BROMIDE	0	0	0	0	1	0	0	0	0	0	0	0	0	0	0	0	0	0	0	0		1
EHMT2	CHEMBL1545737	0	0	0	0	1	0	0	0	0	0	0	0	0	0	0	0	0	0	0	0		1
EHMT2	CHEMBL403741	0	0	0	0	1	0	0	0	0	0	0	0	0	0	0	0	0	0	0	0		1
EHMT2	R-N-PROPYLNORAPOMORPHINE	0	0	0	0	1	0	0	0	0	0	0	0	0	0	0	0	0	0	0	0		1
EHMT2	CHEMBL261557	0	0	0	0	1	0	0	0	0	0	0	0	0	0	0	0	0	0	0	0		1
EHMT2	CHEMBL211042	0	0	0	0	1	0	0	0	0	0	0	0	0	0	0	0	0	0	0	0		1
EHMT2	OXOTREMORINE METHIODIDE	0	0	0	0	1	0	0	0	0	0	0	0	0	0	0	0	0	0	0	0		1
EHMT2	ENOXAMAST	0	0	0	0	1	0	0	0	0	0	0	0	0	0	0	0	0	0	0	0		1
EHMT2	CHEMBL313737	0	0	0	0	1	0	0	0	0	0	0	0	0	0	0	0	0	0	0	0		1
EHMT2	BETAXOLOL HYDROCHLORIDE	0	0	0	0	1	0	0	0	0	0	0	0	0	0	0	0	0	0	0	0		1
EHMT2	CHEMBL328710	0	0	0	0	1	0	0	0	0	0	0	0	0	0	0	0	0	0	0	0		1
EHMT2	CHEMBL1728978	0	0	0	0	1	0	0	0	0	0	0	0	0	0	0	0	0	0	0	0		1
EHMT2	CHEMBL602408	0	0	0	0	1	0	0	0	0	0	0	0	0	0	0	0	0	0	0	0		1
EHMT2	CHEMBL1478462	0	0	0	0	1	0	0	0	0	0	0	0	0	0	0	0	0	0	0	0		1
EHMT2	CATECHOL	0	0	0	0	1	0	0	0	0	0	0	0	0	0	0	0	0	0	0	0		1
EHMT2	TALIPEXOLE HYDROCHLORIDE	0	0	0	0	1	0	0	0	0	0	0	0	0	0	0	0	0	0	0	0		1
EHMT2	CHEMBL284609	0	0	0	0	1	0	0	0	0	0	0	0	0	0	0	0	0	0	0	0		1
EHMT2	APAZONE	0	0	0	0	1	0	0	0	0	0	0	0	0	0	0	0	0	0	0	0		1
EHMT2	SKF-38393	0	0	0	0	1	0	0	0	0	0	0	0	0	0	0	0	0	0	0	0		1
EHMT2	PHENAZINE-1-CARBOXYLIC ACID	0	0	0	0	1	0	0	0	0	0	0	0	0	0	0	0	0	0	0	0		1
EHMT2	ADEFOVIR DIPIVOXIL	0	0	0	0	1	0	0	0	0	0	0	0	0	0	0	0	0	0	0	0		1
EHMT2	CHEMBL512649	0	0	0	0	1	0	0	0	0	0	0	0	0	0	0	0	0	0	0	0		1
EHMT2	IODOPHTHALEIN	0	0	0	0	1	0	0	0	0	0	0	0	0	0	0	0	0	0	0	0		1
EHMT2	IODOQUINOL	0	0	0	0	1	0	0	0	0	0	0	0	0	0	0	0	0	0	0	0		1
EHMT2	CHEMBL532143	0	0	0	0	1	0	0	0	0	0	0	0	0	0	0	0	0	0	0	0		1
EHMT2	METHOTREXATE	0	0	0	0	1	0	0	0	0	0	0	0	0	0	0	0	0	0	0	0		1
EHMT2	MERCURIC CHLORIDE	0	0	0	0	1	0	0	0	0	0	0	0	0	0	0	0	0	0	0	0		1
EHMT2	CHEMBL580816	0	0	0	0	1	0	0	0	0	0	0	0	0	0	0	0	0	0	0	0		1
EHMT2	CHEMBL578294	0	0	0	0	1	0	0	0	0	0	0	0	0	0	0	0	0	0	0	0		1
EHMT2	TALIPEXOLE	0	0	0	0	1	0	0	0	0	0	0	0	0	0	0	0	0	0	0	0		1
EHMT2	CHEMBL592834	0	0	0	0	1	0	0	0	0	0	0	0	0	0	0	0	0	0	0	0		1
EHMT2	CHEMBL2095095	0	0	0	0	1	0	0	0	0	0	0	0	0	0	0	0	0	0	0	0		1
EHMT2	CHEMBL461579	0	0	0	0	1	0	0	0	0	0	0	0	0	0	0	0	0	0	0	0		1
EHMT2	METHYSERGIDE	0	0	0	0	1	0	0	0	0	0	0	0	0	0	0	0	0	0	0	0		1
EHMT2	PROSTAGLANDIN A2	0	0	0	0	1	0	0	0	0	0	0	0	0	0	0	0	0	0	0	0		1
EHMT2	4-DAMP	0	0	0	0	1	0	0	0	0	0	0	0	0	0	0	0	0	0	0	0		1
EHMT2	GALLIC ACID	0	0	0	0	1	0	0	0	0	0	0	0	0	0	0	0	0	0	0	0		1
EHMT2	ERGOCRISTINE	0	0	0	0	1	0	0	0	0	0	0	0	0	0	0	0	0	0	0	0		1
EHMT2	PYRITHIONE	0	0	0	0	1	0	0	0	0	0	0	0	0	0	0	0	0	0	0	0		1
EHMT2	CHEMBL599957	0	0	0	0	1	0	0	0	0	0	0	0	0	0	0	0	0	0	0	0		1
EHMT2	CHEMBL548615	0	0	0	0	1	0	0	0	0	0	0	0	0	0	0	0	0	0	0	0		1
EHMT2	CHEMBL580340	0	0	0	0	1	0	0	0	0	0	0	0	0	0	0	0	0	0	0	0		1
EHMT2	RALOXIFENE HYDROCHLORIDE	0	0	0	0	1	0	0	0	0	0	0	0	0	0	0	0	0	0	0	0		1
EHMT2	SURAMIN HEXASODIUM	0	0	0	0	1	0	0	0	0	0	0	0	0	0	0	0	0	0	0	0		1
EHMT2	EPINEPHRINE BITARTRATE	0	0	0	0	1	0	0	0	0	0	0	0	0	0	0	0	0	0	0	0		1
EHMT2	ARUNDINE	0	0	0	0	1	0	0	0	0	0	0	0	0	0	0	0	0	0	0	0		1
EHMT2	CHEMBL24983	0	0	0	0	1	0	0	0	0	0	0	0	0	0	0	0	0	0	0	0		1
EHMT2	S-NITROSOGLUTATHIONE	0	0	0	0	1	0	0	0	0	0	0	0	0	0	0	0	0	0	0	0		1
EHMT2	MESALAMINE	0	0	0	0	1	0	0	0	0	0	0	0	0	0	0	0	0	0	0	0		1
EHMT2	MIANSERIN HYDROCHLORIDE	0	0	0	0	1	0	0	0	0	0	0	0	0	0	0	0	0	0	0	0		1
EHMT2	GLAUCINE METHIODIDE	0	0	0	0	1	0	0	0	0	0	0	0	0	0	0	0	0	0	0	0		1
EHMT2	CHEMBL527586	0	0	0	0	1	0	0	0	0	0	0	0	0	0	0	0	0	0	0	0		1
EHMT2	CHEMBL589694	0	0	0	0	1	0	0	0	0	0	0	0	0	0	0	0	0	0	0	0		1
EHMT2	METAPHIT METHANESULFONATE	0	0	0	0	1	0	0	0	0	0	0	0	0	0	0	0	0	0	0	0		1
EHMT2	ICILLIN	0	0	0	0	1	0	0	0	0	0	0	0	0	0	0	0	0	0	0	0		1
EHMT2	TAMOXIFEN CITRATE	0	0	0	0	1	0	0	0	0	0	0	0	0	0	0	0	0	0	0	0		1
EHMT2	CHEMBL1256396	0	0	0	0	1	0	0	0	0	0	0	0	0	0	0	0	0	0	0	0		1
EHMT2	LAVENDUSTIN A	0	0	0	0	1	0	0	0	0	0	0	0	0	0	0	0	0	0	0	0		1
EHMT2	MIFEPRISTONE	0	0	0	0	1	0	0	0	0	0	0	0	0	0	0	0	0	0	0	0		1
EHMT2	CHEMBL603370	0	0	0	0	1	0	0	0	0	0	0	0	0	0	0	0	0	0	0	0		1
EHMT2	CHEMBL532160	0	0	0	0	1	0	0	0	0	0	0	0	0	0	0	0	0	0	0	0		1
EHMT2	CHEMBL585656	0	0	0	0	1	0	0	0	0	0	0	0	0	0	0	0	0	0	0	0		1
EHMT2	CAMPTOTHECIN	0	0	0	0	1	0	0	0	0	0	0	0	0	0	0	0	0	0	0	0		1
EHMT2	THIOGUANOSINE	0	0	0	0	1	0	0	0	0	0	0	0	0	0	0	0	0	0	0	0		1
EHMT2	DIAZOXIDE	0	0	0	0	1	0	0	0	0	0	0	0	0	0	0	0	0	0	0	0		1
EHMT2	HERACLENOL	0	0	0	0	1	0	0	0	0	0	0	0	0	0	0	0	0	0	0	0		1
EHMT2	IDARUBICIN	0	0	0	0	1	0	0	0	0	0	0	0	0	0	0	0	0	0	0	0		1
EHMT2	CHEMBL582496	0	0	0	0	1	0	0	0	0	0	0	0	0	0	0	0	0	0	0	0		1
EHMT2	CHEMBL602923	0	0	0	0	1	0	0	0	0	0	0	0	0	0	0	0	0	0	0	0		1
EHMT2	NARINGIN	0	0	0	0	1	0	0	0	0	0	0	0	0	0	0	0	0	0	0	0		1
EHMT2	PICEATANNOL	0	0	0	0	1	0	0	0	0	0	0	0	0	0	0	0	0	0	0	0		1
EHMT2	CYSTAMINE	0	0	0	0	1	0	0	0	0	0	0	0	0	0	0	0	0	0	0	0		1
EHMT2	2'-HYDROXYCHALCONE	0	0	0	0	1	0	0	0	0	0	0	0	0	0	0	0	0	0	0	0		1
EHMT2	CHEMBL186526	0	0	0	0	1	0	0	0	0	0	0	0	0	0	0	0	0	0	0	0		1
EHMT2	BUFLOMEDIL	0	0	0	0	1	0	0	0	0	0	0	0	0	0	0	0	0	0	0	0		1
EHMT2	CROCIN	0	0	0	0	1	0	0	0	0	0	0	0	0	0	0	0	0	0	0	0		1
EHMT2	PYRROLIDINE DITHIOCARBAMIC ACID, AMMONIUM SALT	0	0	0	0	1	0	0	0	0	0	0	0	0	0	0	0	0	0	0	0		1
EHMT2	PHOSMET	0	0	0	0	1	0	0	0	0	0	0	0	0	0	0	0	0	0	0	0		1
EHMT2	E319	0	0	0	0	1	0	0	0	0	0	0	0	0	0	0	0	0	0	0	0		1
EHMT2	N-METHYL-D-ASPARTIC ACID (NMDA)	0	0	0	0	1	0	0	0	0	0	0	0	0	0	0	0	0	0	0	0		1
EHMT2	GUANFACINE	0	0	0	0	1	0	0	0	0	0	0	0	0	0	0	0	0	0	0	0		1
EHMT2	BRILLIANT GREEN OXALATE	0	0	0	0	1	0	0	0	0	0	0	0	0	0	0	0	0	0	0	0		1
EHMT2	CHEMBL1385558	0	0	0	0	1	0	0	0	0	0	0	0	0	0	0	0	0	0	0	0		1
EHMT2	DEXBROMPHENIRAMINE	0	0	0	0	1	0	0	0	0	0	0	0	0	0	0	0	0	0	0	0		1
EHMT2	CHEMBL1256876	0	0	0	0	1	0	0	0	0	0	0	0	0	0	0	0	0	0	0	0		1
EHMT2	CHEMBL582478	0	0	0	0	1	0	0	0	0	0	0	0	0	0	0	0	0	0	0	0		1
EHMT2	CHEMBL527584	0	0	0	0	1	0	0	0	0	0	0	0	0	0	0	0	0	0	0	0		1
EHMT2	APOMORPHINE HYDROCHLORIDE HEMIHYDRATE	0	0	0	0	1	0	0	0	0	0	0	0	0	0	0	0	0	0	0	0		1
EHMT2	PHENINDIONE	0	0	0	0	1	0	0	0	0	0	0	0	0	0	0	0	0	0	0	0		1
EHMT2	CHEMBL591628	0	0	0	0	1	0	0	0	0	0	0	0	0	0	0	0	0	0	0	0		1
EHMT2	HISPIDIN	0	0	0	0	1	0	0	0	0	0	0	0	0	0	0	0	0	0	0	0		1
EHMT2	LAVENDUSTIN C	0	0	0	0	1	0	0	0	0	0	0	0	0	0	0	0	0	0	0	0		1
EHMT2	MEDRONIC ACID	0	0	0	0	1	0	0	0	0	0	0	0	0	0	0	0	0	0	0	0		1
EHMT2	CHEMBL577222	0	0	0	0	1	0	0	0	0	0	0	0	0	0	0	0	0	0	0	0		1
EHMT2	CYSTEINE	0	0	0	0	1	0	0	0	0	0	0	0	0	0	0	0	0	0	0	0		1
EHMT2	BISINDOLYLMALEIMIDE IX	0	0	0	0	1	0	0	0	0	0	0	0	0	0	0	0	0	0	0	0		1
EHMT2	DOXORUBICIN HYDROCHLORIDE	0	0	0	0	1	0	0	0	0	0	0	0	0	0	0	0	0	0	0	0		1
EHMT2	PALIPERIDONE	0	0	0	0	1	0	0	0	0	0	0	0	0	0	0	0	0	0	0	0		1
EHMT2	SULFAPYRIDINE	0	0	0	0	1	0	0	0	0	0	0	0	0	0	0	0	0	0	0	0		1
EHMT2	CHEMBL589715	0	0	0	0	1	0	0	0	0	0	0	0	0	0	0	0	0	0	0	0		1
EHMT2	NORDEXFENFLURAMINE	0	0	0	0	1	0	0	0	0	0	0	0	0	0	0	0	0	0	0	0		1
EHMT2	CHEMBL1335833	0	0	0	0	1	0	0	0	0	0	0	0	0	0	0	0	0	0	0	0		1
EHMT2	CHEMBL1503729	0	0	0	0	1	0	0	0	0	0	0	0	0	0	0	0	0	0	0	0		1
EHMT2	CHEMBL122355	0	0	0	0	1	0	0	0	0	0	0	0	0	0	0	0	0	0	0	0		1
EHMT2	GYKI-52466	0	0	0	0	1	0	0	0	0	0	0	0	0	0	0	0	0	0	0	0		1
EHMT2	CHEMBL547269	0	0	0	0	1	0	0	0	0	0	0	0	0	0	0	0	0	0	0	0		1
EHMT2	BENFLUOREX HYDROCHLORIDE	0	0	0	0	1	0	0	0	0	0	0	0	0	0	0	0	0	0	0	0		1
EHMT2	HYPEROSIDE	0	0	0	0	1	0	0	0	0	0	0	0	0	0	0	0	0	0	0	0		1
EHMT2	TRYPTOPHAN	0	0	0	0	1	0	0	0	0	0	0	0	0	0	0	0	0	0	0	0		1
EHMT2	CAPTAN	0	0	0	0	1	0	0	0	0	0	0	0	0	0	0	0	0	0	0	0		1
EHMT2	INDIGOTINDISULFONATE	0	0	0	0	1	0	0	0	0	0	0	0	0	0	0	0	0	0	0	0		1
EHMT2	DYCLONINE	0	0	0	0	1	0	0	0	0	0	0	0	0	0	0	0	0	0	0	0		1
EHMT2	HYDROQUINONE	0	0	0	0	1	0	0	0	0	0	0	0	0	0	0	0	0	0	0	0		1
EHMT2	BENSERAZIDE	0	0	0	0	1	0	0	0	0	0	0	0	0	0	0	0	0	0	0	0		1
EHMT2	ROTTLERIN	0	0	0	0	1	0	0	0	0	0	0	0	0	0	0	0	0	0	0	0		1
EHMT2	PHYSOSTIGMINE	0	0	0	0	1	0	0	0	0	0	0	0	0	0	0	0	0	0	0	0		1
EHMT2	CHEMBL576409	0	0	0	0	1	0	0	0	0	0	0	0	0	0	0	0	0	0	0	0		1
EHMT2	GALLAMINE TRIETHIODIDE	0	0	0	0	1	0	0	0	0	0	0	0	0	0	0	0	0	0	0	0		1
EHMT2	(+)-TAXIFOLIN	0	0	0	0	1	0	0	0	0	0	0	0	0	0	0	0	0	0	0	0		1
EHMT2	NORFLOXACIN	0	0	0	0	1	0	0	0	0	0	0	0	0	0	0	0	0	0	0	0		1
EHMT2	CHEMBL1255656	0	0	0	0	1	0	0	0	0	0	0	0	0	0	0	0	0	0	0	0		1
EHMT2	CHEMBL559934	0	0	0	0	1	0	0	0	0	0	0	0	0	0	0	0	0	0	0	0		1
EHMT2	PIRETANIDE	0	0	0	0	1	0	0	0	0	0	0	0	0	0	0	0	0	0	0	0		1
EHMT2	CHEMBL1256364	0	0	0	0	1	0	0	0	0	0	0	0	0	0	0	0	0	0	0	0		1
EHMT2	CHEMBL585502	0	0	0	0	1	0	0	0	0	0	0	0	0	0	0	0	0	0	0	0		1
EHMT2	SALSOLINOL HYDROBROMIDE	0	0	0	0	1	0	0	0	0	0	0	0	0	0	0	0	0	0	0	0		1
EHMT2	CHEMBL592558	0	0	0	0	1	0	0	0	0	0	0	0	0	0	0	0	0	0	0	0		1
EHMT2	CHEMBL515495	0	0	0	0	1	0	0	0	0	0	0	0	0	0	0	0	0	0	0	0		1
EHMT2	CHEMBL1509789	0	0	0	0	1	0	0	0	0	0	0	0	0	0	0	0	0	0	0	0		1
EHMT2	CHEMBL584868	0	0	0	0	1	0	0	0	0	0	0	0	0	0	0	0	0	0	0	0		1
EHMT2	PROMETHAZINE	0	0	0	0	1	0	0	0	0	0	0	0	0	0	0	0	0	0	0	0		1
EHMT2	CHEMBL607309	0	0	0	0	1	0	0	0	0	0	0	0	0	0	0	0	0	0	0	0		1
EHMT2	CHEMBL19954	0	0	0	0	1	0	0	0	0	0	0	0	0	0	0	0	0	0	0	0		1
EHMT2	CHEMBL104264	0	0	0	0	1	0	0	0	0	0	0	0	0	0	0	0	0	0	0	0		1
EHMT2	CHEMBL565893	0	0	0	0	1	0	0	0	0	0	0	0	0	0	0	0	0	0	0	0		1
EHMT2	CHEMBL1363249	0	0	0	0	1	0	0	0	0	0	0	0	0	0	0	0	0	0	0	0		1
EHMT2	Z-PRO-PROLINAL	0	0	0	0	1	0	0	0	0	0	0	0	0	0	0	0	0	0	0	0		1
EHMT2	CHEMBL322970	0	0	0	0	1	0	0	0	0	0	0	0	0	0	0	0	0	0	0	0		1
EHMT2	CHEMBL1256845	0	0	0	0	1	0	0	0	0	0	0	0	0	0	0	0	0	0	0	0		1
EHMT2	CHEMBL338115	0	0	0	0	1	0	0	0	0	0	0	0	0	0	0	0	0	0	0	0		1
EHMT2	CHEMBL528119	0	0	0	0	1	0	0	0	0	0	0	0	0	0	0	0	0	0	0	0		1
EHMT2	CHEMBL581152	0	0	0	0	1	0	0	0	0	0	0	0	0	0	0	0	0	0	0	0		1
EHMT2	CYCLOBENZAPRINE HYDROCHLORIDE	0	0	0	0	1	0	0	0	0	0	0	0	0	0	0	0	0	0	0	0		1
EHMT2	CHEMBL56731	0	0	0	0	1	0	0	0	0	0	0	0	0	0	0	0	0	0	0	0		1
EHMT2	CHEMBL601364	0	0	0	0	1	0	0	0	0	0	0	0	0	0	0	0	0	0	0	0		1
EHMT2	CHEMBL589479	0	0	0	0	1	0	0	0	0	0	0	0	0	0	0	0	0	0	0	0		1
EHMT2	ALFUZOSIN	0	0	0	0	1	0	0	0	0	0	0	0	0	0	0	0	0	0	0	0		1
EHMT2	CHEMBL27403	0	0	0	0	1	0	0	0	0	0	0	0	0	0	0	0	0	0	0	0		1
EHMT2	CHEMBL121915	0	0	0	0	1	0	0	0	0	0	0	0	0	0	0	0	0	0	0	0		1
EHMT2	TAMOXIFEN	0	0	0	0	1	0	0	0	0	0	0	0	0	0	0	0	0	0	0	0		1
EHMT2	OMEPRAZOLE	0	0	0	0	1	0	0	0	0	0	0	0	0	0	0	0	0	0	0	0		1
EHMT2	CHEMBL601367	0	0	0	0	1	0	0	0	0	0	0	0	0	0	0	0	0	0	0	0		1
EHMT2	CHEMBL584458	0	0	0	0	1	0	0	0	0	0	0	0	0	0	0	0	0	0	0	0		1
EHMT2	CHEMBL32307	0	0	0	0	1	0	0	0	0	0	0	0	0	0	0	0	0	0	0	0		1
EHMT2	CHEMBL88553	0	0	0	0	1	0	0	0	0	0	0	0	0	0	0	0	0	0	0	0		1
EHMT2	CHEMBL224032	0	0	0	0	1	0	0	0	0	0	0	0	0	0	0	0	0	0	0	0		1
EHMT2	SPICLOMAZINE	0	0	0	0	1	0	0	0	0	0	0	0	0	0	0	0	0	0	0	0		1
EHMT2	KETOCONAZOLE	0	0	0	0	1	0	0	0	0	0	0	0	0	0	0	0	0	0	0	0		1
EHMT2	TINORIDINE	0	0	0	0	1	0	0	0	0	0	0	0	0	0	0	0	0	0	0	0		1
EHMT2	CHEMBL1256510	0	0	0	0	1	0	0	0	0	0	0	0	0	0	0	0	0	0	0	0		1
EHMT2	BAY-11-7085	0	0	0	0	1	0	0	0	0	0	0	0	0	0	0	0	0	0	0	0		1
EHMT2	CHEMBL398765	0	0	0	0	1	0	0	0	0	0	0	0	0	0	0	0	0	0	0	0		1
EHMT2	CHEMBL589469	0	0	0	0	1	0	0	0	0	0	0	0	0	0	0	0	0	0	0	0		1
EHMT2	CHEMBL313938	0	0	0	0	1	0	0	0	0	0	0	0	0	0	0	0	0	0	0	0		1
EHMT2	CHEMBL586982	0	0	0	0	1	0	0	0	0	0	0	0	0	0	0	0	0	0	0	0		1
EHMT2	PAROXETINE HYDROCHLORIDE	0	0	0	0	1	0	0	0	0	0	0	0	0	0	0	0	0	0	0	0		1
EHMT2	DYCLONINE HYDROCHLORIDE	0	0	0	0	1	0	0	0	0	0	0	0	0	0	0	0	0	0	0	0		1
EHMT2	CHEMBL580076	0	0	0	0	1	0	0	0	0	0	0	0	0	0	0	0	0	0	0	0		1
EHMT2	RANITIDINE	0	0	0	0	1	0	0	0	0	0	0	0	0	0	0	0	0	0	0	0		1
EHMT2	CHEMBL590186	0	0	0	0	1	0	0	0	0	0	0	0	0	0	0	0	0	0	0	0		1
EHMT2	IODOACETAMIDE	0	0	0	0	1	0	0	0	0	0	0	0	0	0	0	0	0	0	0	0		1
EHMT2	CHEMBL1256797	0	0	0	0	1	0	0	0	0	0	0	0	0	0	0	0	0	0	0	0		1
EHMT2	2-MERCAPTONICOTINIC ACID	0	0	0	0	1	0	0	0	0	0	0	0	0	0	0	0	0	0	0	0		1
EHMT2	CHEMBL583150	0	0	0	0	1	0	0	0	0	0	0	0	0	0	0	0	0	0	0	0		1
EHMT2	CHEMBL1984884	0	0	0	0	1	0	0	0	0	0	0	0	0	0	0	0	0	0	0	0		1
EHMT2	IMETIT	0	0	0	0	1	0	0	0	0	0	0	0	0	0	0	0	0	0	0	0		1
EHMT2	OXITRIPTAN	0	0	0	0	1	0	0	0	0	0	0	0	0	0	0	0	0	0	0	0		1
EHMT2	5-BENZYLOXYTRYPTAMINE	0	0	0	0	1	0	0	0	0	0	0	0	0	0	0	0	0	0	0	0		1
EHMT2	CHEMBL339587	0	0	0	0	1	0	0	0	0	0	0	0	0	0	0	0	0	0	0	0		1
EHMT2	SARCOLYSIN	0	0	0	0	1	0	0	0	0	0	0	0	0	0	0	0	0	0	0	0		1
EHMT2	METHYLERGONOVINE	0	0	0	0	1	0	0	0	0	0	0	0	0	0	0	0	0	0	0	0		1
EHMT2	CHEMBL1341830	0	0	0	0	1	0	0	0	0	0	0	0	0	0	0	0	0	0	0	0		1
EHMT2	FLUTAMIDE	0	0	0	0	1	0	0	0	0	0	0	0	0	0	0	0	0	0	0	0		1
EHMT2	CHEMBL129841	0	0	0	0	1	0	0	0	0	0	0	0	0	0	0	0	0	0	0	0		1
EHMT2	CHEMBL585030	0	0	0	0	1	0	0	0	0	0	0	0	0	0	0	0	0	0	0	0		1
EHMT2	METIZOLINE	0	0	0	0	1	0	0	0	0	0	0	0	0	0	0	0	0	0	0	0		1
EHMT2	CHEMBL1256885	0	0	0	0	1	0	0	0	0	0	0	0	0	0	0	0	0	0	0	0		1
EHMT2	CHEMBL171699	0	0	0	0	1	0	0	0	0	0	0	0	0	0	0	0	0	0	0	0		1
EHMT2	CHEMBL387632	0	0	0	0	1	0	0	0	0	0	0	0	0	0	0	0	0	0	0	0		1
EHMT2	CHEMBL1255936	0	0	0	0	1	0	0	0	0	0	0	0	0	0	0	0	0	0	0	0		1
EHMT2	METERGOLINE	0	0	0	0	1	0	0	0	0	0	0	0	0	0	0	0	0	0	0	0		1
EHMT2	CHEMBL316796	0	0	0	0	1	0	0	0	0	0	0	0	0	0	0	0	0	0	0	0		1
EHMT2	METITEPINE	0	0	0	0	1	0	0	0	0	0	0	0	0	0	0	0	0	0	0	0		1
EHMT2	ERGOCALCIFEROL	0	0	0	0	1	0	0	0	0	0	0	0	0	0	0	0	0	0	0	0		1
EHMT2	NALIDIXIC ACID	0	0	0	0	1	0	0	0	0	0	0	0	0	0	0	0	0	0	0	0		1
EHMT2	CHLOROGENIC ACID	0	0	0	0	1	0	0	0	0	0	0	0	0	0	0	0	0	0	0	0		1
EHMT2	CHEMBL533577	0	0	0	0	1	0	0	0	0	0	0	0	0	0	0	0	0	0	0	0		1
EHMT2	8-OH-DPAT	0	0	0	0	1	0	0	0	0	0	0	0	0	0	0	0	0	0	0	0		1
EHMT2	CHEMBL578504	0	0	0	0	1	0	0	0	0	0	0	0	0	0	0	0	0	0	0	0		1
EHMT2	DIHYDREXIDINE HYDROCHLORIDE	0	0	0	0	1	0	0	0	0	0	0	0	0	0	0	0	0	0	0	0		1
EHMT2	HYDROXYZINE PAMOATE	0	0	0	0	1	0	0	0	0	0	0	0	0	0	0	0	0	0	0	0		1
EHMT2	PHENAZINE	0	0	0	0	1	0	0	0	0	0	0	0	0	0	0	0	0	0	0	0		1
EHMT2	TYRPHOSTIN 25	0	0	0	0	1	0	0	0	0	0	0	0	0	0	0	0	0	0	0	0		1
EHMT2	WORTMANNIN	0	0	0	0	1	0	0	0	0	0	0	0	0	0	0	0	0	0	0	0		1
EHMT2	RHEIN	0	0	0	0	1	0	0	0	0	0	0	0	0	0	0	0	0	0	0	0		1
EHMT2	PROROXAN	0	0	0	0	1	0	0	0	0	0	0	0	0	0	0	0	0	0	0	0		1
EHMT2	CHEMBL505670	0	0	0	0	1	0	0	0	0	0	0	0	0	0	0	0	0	0	0	0		1
EHMT2	CHEMBL598268	0	0	0	0	1	0	0	0	0	0	0	0	0	0	0	0	0	0	0	0		1
EHMT2	CEFOTAXIME	0	0	0	0	1	0	0	0	0	0	0	0	0	0	0	0	0	0	0	0		1
EHMT2	CHEMBL581872	0	0	0	0	1	0	0	0	0	0	0	0	0	0	0	0	0	0	0	0		1
EHMT2	EPHEDRINE SULFATE	0	0	0	0	1	0	0	0	0	0	0	0	0	0	0	0	0	0	0	0		1
EHMT2	DOXYLAMINE	0	0	0	0	1	0	0	0	0	0	0	0	0	0	0	0	0	0	0	0		1
EHMT2	TELENZEPINE	0	0	0	0	1	0	0	0	0	0	0	0	0	0	0	0	0	0	0	0		1
EHMT2	CHEMBL537045	0	0	0	0	1	0	0	0	0	0	0	0	0	0	0	0	0	0	0	0		1
EHMT2	MITOXANTRONE HYDROCHLORIDE	0	0	0	0	1	0	0	0	0	0	0	0	0	0	0	0	0	0	0	0		1
EHMT2	(R,S)-AMPA	0	0	0	0	1	0	0	0	0	0	0	0	0	0	0	0	0	0	0	0		1
EHMT2	CHEMBL297304	0	0	0	0	1	0	0	0	0	0	0	0	0	0	0	0	0	0	0	0		1
EHMT2	CHEMBL596836	0	0	0	0	1	0	0	0	0	0	0	0	0	0	0	0	0	0	0	0		1
EHMT2	CHEMBL590666	0	0	0	0	1	0	0	0	0	0	0	0	0	0	0	0	0	0	0	0		1
EHMT2	CHEMBL602776	0	0	0	0	1	0	0	0	0	0	0	0	0	0	0	0	0	0	0	0		1
EHMT2	DIPYRITHIONE	0	0	0	0	1	0	0	0	0	0	0	0	0	0	0	0	0	0	0	0		1
EHMT2	LEVISOPRENALINE	0	0	0	0	1	0	0	0	0	0	0	0	0	0	0	0	0	0	0	0		1
EHMT2	CEPHALOTHIN SODIUM	0	0	0	0	1	0	0	0	0	0	0	0	0	0	0	0	0	0	0	0		1
EHMT2	RESCINNAMINE	0	0	0	0	1	0	0	0	0	0	0	0	0	0	0	0	0	0	0	0		1
EHMT2	CYCLOSERINE	0	0	0	0	1	0	0	0	0	0	0	0	0	0	0	0	0	0	0	0		1
EHMT2	CHEMBL600306	0	0	0	0	1	0	0	0	0	0	0	0	0	0	0	0	0	0	0	0		1
EHMT2	CHEMBL1256863	0	0	0	0	1	0	0	0	0	0	0	0	0	0	0	0	0	0	0	0		1
EHMT2	BENANSERIN HYDROCHLORIDE	0	0	0	0	1	0	0	0	0	0	0	0	0	0	0	0	0	0	0	0		1
EHMT2	CLINAFLOXACIN	0	0	0	0	1	0	0	0	0	0	0	0	0	0	0	0	0	0	0	0		1
EHMT2	FENRETINIDE	0	0	0	0	1	0	0	0	0	0	0	0	0	0	0	0	0	0	0	0		1
EHMT2	TRETINOIN	0	0	0	0	1	0	0	0	0	0	0	0	0	0	0	0	0	0	0	0		1
EHMT2	CYCLOPHOSPHAMIDE	0	0	0	0	1	0	0	0	0	0	0	0	0	0	0	0	0	0	0	0		1
EHMT2	CHEMBL538104	0	0	0	0	1	0	0	0	0	0	0	0	0	0	0	0	0	0	0	0		1
EHMT2	CHEMBL1256995	0	0	0	0	1	0	0	0	0	0	0	0	0	0	0	0	0	0	0	0		1
EHMT2	CHEMBL84010	0	0	0	0	1	0	0	0	0	0	0	0	0	0	0	0	0	0	0	0		1
EHMT2	TROLOX	0	0	0	0	1	0	0	0	0	0	0	0	0	0	0	0	0	0	0	0		1
EHMT2	CHEMBL235891	0	0	0	0	1	0	0	0	0	0	0	0	0	0	0	0	0	0	0	0		1
EHMT2	CHEMBL1486366	0	0	0	0	1	0	0	0	0	0	0	0	0	0	0	0	0	0	0	0		1
EHMT2	UMIFENOVIR	0	0	0	0	1	0	0	0	0	0	0	0	0	0	0	0	0	0	0	0		1
EHMT2	GABACULINE HYDROCHLORIDE	0	0	0	0	1	0	0	0	0	0	0	0	0	0	0	0	0	0	0	0		1
EHMT2	FLUMEQUINE	0	0	0	0	1	0	0	0	0	0	0	0	0	0	0	0	0	0	0	0		1
EHMT2	FLUNARIZINE	0	0	0	0	1	0	0	0	0	0	0	0	0	0	0	0	0	0	0	0		1
EHMT2	EPIGALOCATECHIN GALLATE	0	0	0	0	1	0	0	0	0	0	0	0	0	0	0	0	0	0	0	0		1
EHMT2	SYROSINGOPINE	0	0	0	0	1	0	0	0	0	0	0	0	0	0	0	0	0	0	0	0		1
EHMT2	CGP-53353	0	0	0	0	1	0	0	0	0	0	0	0	0	0	0	0	0	0	0	0		1
EHMT2	GR-127935	0	0	0	0	1	0	0	0	0	0	0	0	0	0	0	0	0	0	0	0		1
EHMT2	CEFOTAXIME SODIUM	0	0	0	0	1	0	0	0	0	0	0	0	0	0	0	0	0	0	0	0		1
EHMT2	METHYLMALONIC ACID	0	0	0	0	1	0	0	0	0	0	0	0	0	0	0	0	0	0	0	0		1
EHMT2	CHEMBL179611	0	0	0	0	1	0	0	0	0	0	0	0	0	0	0	0	0	0	0	0		1
EHMT2	CHEMBL86464	0	0	0	0	1	0	0	0	0	0	0	0	0	0	0	0	0	0	0	0		1
EHMT2	LONIDAMINE	0	0	0	0	1	0	0	0	0	0	0	0	0	0	0	0	0	0	0	0		1
EHMT2	CLOMETHIAZOLE	0	0	0	0	1	0	0	0	0	0	0	0	0	0	0	0	0	0	0	0		1
EHMT2	CHEMBL279556	0	0	0	0	1	0	0	0	0	0	0	0	0	0	0	0	0	0	0	0		1
EHMT2	SEMAXANIB	0	0	0	0	1	0	0	0	0	0	0	0	0	0	0	0	0	0	0	0		1
EHMT2	CHEMBL1160508	0	0	0	0	1	0	0	0	0	0	0	0	0	0	0	0	0	0	0	0		1
EHMT2	CHEMBL1256738	0	0	0	0	1	0	0	0	0	0	0	0	0	0	0	0	0	0	0	0		1
EHMT2	CHEMBL316589	0	0	0	0	1	0	0	0	0	0	0	0	0	0	0	0	0	0	0	0		1
EHMT2	OLPRINONE	0	0	0	0	1	0	0	0	0	0	0	0	0	0	0	0	0	0	0	0		1
EHMT2	TRANSTORINE	0	0	0	0	1	0	0	0	0	0	0	0	0	0	0	0	0	0	0	0		1
EHMT2	CHEMBL602807	0	0	0	0	1	0	0	0	0	0	0	0	0	0	0	0	0	0	0	0		1
EHMT2	CHEMBL1310138	0	0	0	0	1	0	0	0	0	0	0	0	0	0	0	0	0	0	0	0		1
EHMT2	FENOLDOPAM	0	0	0	0	1	0	0	0	0	0	0	0	0	0	0	0	0	0	0	0		1
EHMT2	CHEMBL395915	0	0	0	0	1	0	0	0	0	0	0	0	0	0	0	0	0	0	0	0		1
EHMT2	THIOINOSINE	0	0	0	0	1	0	0	0	0	0	0	0	0	0	0	0	0	0	0	0		1
EHMT2	CHLOROETHYLCLONIDINE	0	0	0	0	1	0	0	0	0	0	0	0	0	0	0	0	0	0	0	0		1
EHMT2	CHEMBL547483	0	0	0	0	1	0	0	0	0	0	0	0	0	0	0	0	0	0	0	0		1
EHMT2	METHOCTRAMINE	0	0	0	0	1	0	0	0	0	0	0	0	0	0	0	0	0	0	0	0		1
EHMT2	ENROFLOXACIN	0	0	0	0	1	0	0	0	0	0	0	0	0	0	0	0	0	0	0	0		1
EHMT2	BRIMONIDINE	0	0	0	0	1	0	0	0	0	0	0	0	0	0	0	0	0	0	0	0		1
EHMT2	ERGOCORNINE	0	0	0	0	1	0	0	0	0	0	0	0	0	0	0	0	0	0	0	0		1
EHMT2	CHEMBL1537417	0	0	0	0	1	0	0	0	0	0	0	0	0	0	0	0	0	0	0	0		1
EHMT2	1-AMINOCYCLOPROPANE CARBOXYLIC ACID	0	0	0	0	1	0	0	0	0	0	0	0	0	0	0	0	0	0	0	0		1
EHMT2	CHEMBL227959	0	0	0	0	1	0	0	0	0	0	0	0	0	0	0	0	0	0	0	0		1
EHMT2	CHEMBL472940	0	0	0	0	1	0	0	0	0	0	0	0	0	0	0	0	0	0	0	0		1
EHMT2	CHEMBL585240	0	0	0	0	1	0	0	0	0	0	0	0	0	0	0	0	0	0	0	0		1
EHMT2	DAUNORUBICIN HYDROCHLORIDE	0	0	0	0	1	0	0	0	0	0	0	0	0	0	0	0	0	0	0	0		1
EHMT2	ALTENUSIN	0	0	0	0	1	0	0	0	0	0	0	0	0	0	0	0	0	0	0	0		1
EHMT2	OXYPHENBUTAZONE	0	0	0	0	1	0	0	0	0	0	0	0	0	0	0	0	0	0	0	0		1
EHMT2	CEPHALEXIN	0	0	0	0	1	0	0	0	0	0	0	0	0	0	0	0	0	0	0	0		1
EHMT2	CHEMBL585628	0	0	0	0	1	0	0	0	0	0	0	0	0	0	0	0	0	0	0	0		1
EHMT2	DEBRISOQUIN SULFATE	0	0	0	0	1	0	0	0	0	0	0	0	0	0	0	0	0	0	0	0		1
EHMT2	CEFAZOLIN	0	0	0	0	1	0	0	0	0	0	0	0	0	0	0	0	0	0	0	0		1
EHMT2	CHEMBL1256186	0	0	0	0	1	0	0	0	0	0	0	0	0	0	0	0	0	0	0	0		1
EHMT2	CHEMBL586029	0	0	0	0	1	0	0	0	0	0	0	0	0	0	0	0	0	0	0	0		1
EHMT2	CHEMBL1312050	0	0	0	0	1	0	0	0	0	0	0	0	0	0	0	0	0	0	0	0		1
EHMT2	SULINDAC	0	0	0	0	1	0	0	0	0	0	0	0	0	0	0	0	0	0	0	0		1
EHMT2	CYSTAMINE DIHYDROCHLORIDE	0	0	0	0	1	0	0	0	0	0	0	0	0	0	0	0	0	0	0	0		1
EHMT2	AZEPEXOLE	0	0	0	0	1	0	0	0	0	0	0	0	0	0	0	0	0	0	0	0		1
EHMT2	TELMISARTAN	0	0	0	0	1	0	0	0	0	0	0	0	0	0	0	0	0	0	0	0		1
EHMT2	CHAETOCIN	0	0	0	0	1	0	0	0	0	0	0	0	0	0	0	0	0	0	0	0		1
EHMT2	IMIDAZOLE ACETIC ACID	0	0	0	0	1	0	0	0	0	0	0	0	0	0	0	0	0	0	0	0		1
EHMT2	PAXILLINE	0	0	0	0	1	0	0	0	0	0	0	0	0	0	0	0	0	0	0	0		1
EHMT2	CHLOROQUINE	0	0	0	0	1	0	0	0	0	0	0	0	0	0	0	0	0	0	0	0		1
EHMT2	LANSOPRAZOLE	0	0	0	0	1	0	0	0	0	0	0	0	0	0	0	0	0	0	0	0		1
EHMT2	LOMEFLOXACIN	0	0	0	0	1	0	0	0	0	0	0	0	0	0	0	0	0	0	0	0		1
EHMT2	PHENELZINE	0	0	0	0	1	0	0	0	0	0	0	0	0	0	0	0	0	0	0	0		1
EHMT2	FUSARIC ACID	0	0	0	0	1	0	0	0	0	0	0	0	0	0	0	0	0	0	0	0		1
EHMT2	ETHACRYNIC ACID	0	0	0	0	1	0	0	0	0	0	0	0	0	0	0	0	0	0	0	0		1
EHMT2	ETAZOLATE	0	0	0	0	1	0	0	0	0	0	0	0	0	0	0	0	0	0	0	0		1
EHMT2	CGP-12177	0	0	0	0	1	0	0	0	0	0	0	0	0	0	0	0	0	0	0	0		1
EHMT2	CHEMBL1256689	0	0	0	0	1	0	0	0	0	0	0	0	0	0	0	0	0	0	0	0		1
EHMT2	SULINDAC SULFOXIDE	0	0	0	0	1	0	0	0	0	0	0	0	0	0	0	0	0	0	0	0		1
EHMT2	CHEMBL154580	0	0	0	0	1	0	0	0	0	0	0	0	0	0	0	0	0	0	0	0		1
EHMT2	CHEMBL282199	0	0	0	0	1	0	0	0	0	0	0	0	0	0	0	0	0	0	0	0		1
EHMT2	ETHAMSYLATE	0	0	0	0	1	0	0	0	0	0	0	0	0	0	0	0	0	0	0	0		1
EHMT2	THIETHYLPERAZINE MALATE	0	0	0	0	1	0	0	0	0	0	0	0	0	0	0	0	0	0	0	0		1
EHMT2	TRICHOSTATIN	0	0	0	0	1	0	0	0	0	0	0	0	0	0	0	0	0	0	0	0		1
EHMT2	NICARDIPINE HYDROCHLORIDE	0	0	0	0	1	0	0	0	0	0	0	0	0	0	0	0	0	0	0	0		1
EHMT2	CHEMBL530280	0	0	0	0	1	0	0	0	0	0	0	0	0	0	0	0	0	0	0	0		1
EHMT2	CHEMBL234338	0	0	0	0	1	0	0	0	0	0	0	0	0	0	0	0	0	0	0	0		1
EHMT2	PYRROLIDINE DITHIOCARBAMATE	0	0	0	0	1	0	0	0	0	0	0	0	0	0	0	0	0	0	0	0		1
EHMT2	ENCLOMIPHENE CITRATE	0	0	0	0	1	0	0	0	0	0	0	0	0	0	0	0	0	0	0	0		1
EHMT2	CHLORHEXIDINE	0	0	0	0	1	0	0	0	0	0	0	0	0	0	0	0	0	0	0	0		1
EHMT2	PERAZINE	0	0	0	0	1	0	0	0	0	0	0	0	0	0	0	0	0	0	0	0		1
EHMT2	DIPYRIDAMOLE	0	0	0	0	1	0	0	0	0	0	0	0	0	0	0	0	0	0	0	0		1
EHMT2	GOSSYPOL	0	0	0	0	1	0	0	0	0	0	0	0	0	0	0	0	0	0	0	0		1
EHMT2	BUTHIONINE SULFOXIMINE	0	0	0	0	1	0	0	0	0	0	0	0	0	0	0	0	0	0	0	0		1
EHMT2	CHEMBL198666	0	0	0	0	1	0	0	0	0	0	0	0	0	0	0	0	0	0	0	0		1
EHMT2	GUAIAZULEN	0	0	0	0	1	0	0	0	0	0	0	0	0	0	0	0	0	0	0	0		1
EHMT2	NICARDIPINE	0	0	0	0	1	0	0	0	0	0	0	0	0	0	0	0	0	0	0	0		1
EHMT2	NOLATREXED	0	0	0	0	1	0	0	0	0	0	0	0	0	0	0	0	0	0	0	0		1
EHMT2	4-BENZYLOXYANILINE	0	0	0	0	1	0	0	0	0	0	0	0	0	0	0	0	0	0	0	0		1
EHMT2	CHEMBL586195	0	0	0	0	1	0	0	0	0	0	0	0	0	0	0	0	0	0	0	0		1
EHMT2	CHEMBL538542	0	0	0	0	1	0	0	0	0	0	0	0	0	0	0	0	0	0	0	0		1
EHMT2	CHEMBL1331995	0	0	0	0	1	0	0	0	0	0	0	0	0	0	0	0	0	0	0	0		1
EHMT2	TYRPHOSTIN AG 879	0	0	0	0	1	0	0	0	0	0	0	0	0	0	0	0	0	0	0	0		1
EHMT2	CHEMBL458328	0	0	0	0	1	0	0	0	0	0	0	0	0	0	0	0	0	0	0	0		1
EHMT2	HINOKITIOL	0	0	0	0	1	0	0	0	0	0	0	0	0	0	0	0	0	0	0	0		1
EHMT2	CARBETAPENTANE	0	0	0	0	1	0	0	0	0	0	0	0	0	0	0	0	0	0	0	0		1
EHMT2	FOMEPIZOLE	0	0	0	0	1	0	0	0	0	0	0	0	0	0	0	0	0	0	0	0		1
EHMT2	ELLIPTECINE	0	0	0	0	1	0	0	0	0	0	0	0	0	0	0	0	0	0	0	0		1
EHMT2	DANTHRON	0	0	0	0	1	0	0	0	0	0	0	0	0	0	0	0	0	0	0	0		1
EHMT2	FIDUXOSIN HYDROCHLORIDE	0	0	0	0	1	0	0	0	0	0	0	0	0	0	0	0	0	0	0	0		1
EHMT2	CYSTEAMINE HYDROCHLORIDE	0	0	0	0	1	0	0	0	0	0	0	0	0	0	0	0	0	0	0	0		1
EHMT2	CIANIDANOL	0	0	0	0	1	0	0	0	0	0	0	0	0	0	0	0	0	0	0	0		1
EHMT2	CHEMBL578675	0	0	0	0	1	0	0	0	0	0	0	0	0	0	0	0	0	0	0	0		1
EHMT2	CHEMBL193093	0	0	0	0	1	0	0	0	0	0	0	0	0	0	0	0	0	0	0	0		1
EHMT2	ZIPRASIDONE	0	0	0	0	1	0	0	0	0	0	0	0	0	0	0	0	0	0	0	0		1
EHMT2	CHEMBL211670	0	0	0	0	1	0	0	0	0	0	0	0	0	0	0	0	0	0	0	0		1
EHMT2	CHEMBL601547	0	0	0	0	1	0	0	0	0	0	0	0	0	0	0	0	0	0	0	0		1
EHMT2	CHEMBL1448793	0	0	0	0	1	0	0	0	0	0	0	0	0	0	0	0	0	0	0	0		1
EHMT2	CHEMBL530664	0	0	0	0	1	0	0	0	0	0	0	0	0	0	0	0	0	0	0	0		1
EHMT2	CHEMBL67535	0	0	0	0	1	0	0	0	0	0	0	0	0	0	0	0	0	0	0	0		1
EHMT2	CHEMBL600173	0	0	0	0	1	0	0	0	0	0	0	0	0	0	0	0	0	0	0	0		1
EHMT2	QUINOLINIC ACID	0	0	0	0	1	0	0	0	0	0	0	0	0	0	0	0	0	0	0	0		1
EHMT2	DIMERCAPROL	0	0	0	0	1	0	0	0	0	0	0	0	0	0	0	0	0	0	0	0		1
EHMT2	AMARANTH	0	0	0	0	1	0	0	0	0	0	0	0	0	0	0	0	0	0	0	0		1
EHMT2	CITALOPRAM	0	0	0	0	1	0	0	0	0	0	0	0	0	0	0	0	0	0	0	0		1
EHMT2	HYDRALAZINE	0	0	0	0	1	0	0	0	0	0	0	0	0	0	0	0	0	0	0	0		1
EHMT2	CHEMBL17329	0	0	0	0	1	0	0	0	0	0	0	0	0	0	0	0	0	0	0	0		1
EHMT2	PROROXAN HYDROCHLORIDE	0	0	0	0	1	0	0	0	0	0	0	0	0	0	0	0	0	0	0	0		1
EHMT2	CHEMBL56543	0	0	0	0	1	0	0	0	0	0	0	0	0	0	0	0	0	0	0	0		1
EHMT2	PHENANTHROLINE	0	0	0	0	1	0	0	0	0	0	0	0	0	0	0	0	0	0	0	0		1
EHMT2	CHEMBL139935	0	0	0	0	1	0	0	0	0	0	0	0	0	0	0	0	0	0	0	0		1
EHMT2	HARMOL	0	0	0	0	1	0	0	0	0	0	0	0	0	0	0	0	0	0	0	0		1
EHMT2	LEVONORDEFRIN	0	0	0	0	1	0	0	0	0	0	0	0	0	0	0	0	0	0	0	0		1
EHMT2	THIORIDAZINE	0	0	0	0	1	0	0	0	0	0	0	0	0	0	0	0	0	0	0	0		1
EHMT2	LISINOPRIL HYDRATE	0	0	0	0	1	0	0	0	0	0	0	0	0	0	0	0	0	0	0	0		1
EHMT2	CHEMBL68534	0	0	0	0	1	0	0	0	0	0	0	0	0	0	0	0	0	0	0	0		1
EHMT2	CHEMBL116548	0	0	0	0	1	0	0	0	0	0	0	0	0	0	0	0	0	0	0	0		1
EHMT2	PHENOTHIAZINE	0	0	0	0	1	0	0	0	0	0	0	0	0	0	0	0	0	0	0	0		1
EHMT2	ENOXIMONE	0	0	0	0	1	0	0	0	0	0	0	0	0	0	0	0	0	0	0	0		1
EHMT2	PHENSERINE	0	0	0	0	1	0	0	0	0	0	0	0	0	0	0	0	0	0	0	0		1
EHMT2	CHEMBL466465	0	0	0	0	1	0	0	0	0	0	0	0	0	0	0	0	0	0	0	0		1
[truncated: 2,047 more rows]
